# Supplementary material for: Insight into the mechanisms of terminal HS-tolerance in wheat mutant with improved nutritional quality through de novo transcriptome sequencing
Source: Research Square preprint supplement (doi:10.21203/rs.3.rs-241832/v1), 2021-02-26
Supplement: Supplementary file 1 [file 0414dbd7a358318728e1f2c7.docx]

**Table S1.** List of primers used for the validation of randomly selected upregulated and downregulated transcripts using quantitative real-time PCR (qRT-PCR) in wheat mutant (M3), and parent (P3) under HS.

| **Primers** | **5' - 3'** | **Tm (°C)** |
| --- | --- | --- |
| **Upregulated** |  |  |
| CDPK-F | TAGAGCGGGAAGAACACTTG | 58.1 |
| CDPK-R | CCAATATTGCCACCATTAGC | 57.9 |
| HSP70-F | CCAACGGTAACCTGAATGTC | 57.9 |
| HSP70-R | TCCACCTTCTTCTTGTGCTC | 58.2 |
| HSP17-F | GAGGGAGGAGAAGGAGGAC | 57.7 |
| HSP17-R | TCGCTACTCTCTGCTTCGAT | 57.9 |
| HSP101-F | CAAGGTCATCCTCTTCATCG | 58.2 |
| HSP101-R | TACTTGCGGTACTCCTCCAG | 57.9 |
| HSF-F | CCAACTTCTCCAGCTTCGTC | 60.1 |
| HSF-R | TGCTGCTGATGTCTTCATCC | 59.9 |
| STKs-F | TCCGCCATGAGAATGTTATT | 58.1 |
| STKs-R | CCAGTAGGTTCCCAGGTTTT | 58.5 |
| PPIase-F | CTTTGCTGTGGTTCCTCCTA | 57.9 |
| PPIase-R | CCTTGGATTGCTTCTTCTCA | 58.2 |
| SOD-F | GGTGTGGCTAGCTTTGGATA | 58.7 |
| SOD-R | TTCACCACCTTCCAGATGTT | 58.6 |
| OEEP-F | AGCTACAGGGGTTCGTCTTT | 57.9 |
| OEEP-R | CTGGATCTTGACATCCTTGG | 58.3 |
| ABC-Tra-F | CGACGCCTTGTAGGAGATAA | 58.1 |
| ABC-Tra-R | AGTTCGAATACTGCCGACTG | 57.9 |
| **Downregulated** |  |  |
| PDC-F | CACTTCCTCGGCACCTACT | 57.8 |
| PDC-R | CCAATGCAGACAGGTACTCC | 58.1 |
| SPS-F | taacatctgggggcatagaa | 58.3 |
| SPS-R | tctcgctgttcttttctgct | 57.9 |
| Suc Syn-F | tggtaaacctggtggttgtt | 57.8 |
| Suc Syn-R | atctcagctggaccaccata | 58.1 |
| SuT-F | CTCGGGATCACATCTATTGG | 57.9 |
| SuT-R | CCCAAGATTTTCAACACGAC | 58.2 |
| SS-F | GCTACATGTGGGAGCTGAAG | 58.4 |
| SS-R | GTTGGTGTAGTCGTCGGAGT | 57.6 |
| Rub(S)-F | TGTGTGCATTCCACAATTTC | 57.9 |
| Rub(S)-R | GTAGTCGACCTGCTTCAGGA | 58,2 |
| β-Amylase-F | CCTGATCGTGGACATAGAGG | 58.1 |
| β-Amylase-R | AAGGAAGAACCTCCCCTTCT | 58.2 |
| FBA-F | gggcggagaccttctactac | 57.8 |
| FBA-R | gaggagcttgagggtgtagc | 59.1 |
| DBE-F | CTTTCAAACCTGCAAAAGGA | 58.6 |
| DBE-R | TCTCATCTCGTGCATCTTCA | 58.1 |
| AGPase-F | CTTTCTGGCGATCACCTCTA | 58.1 |
| AGPase-R | ATCAGCTCCTCTCGGTTTTT | 58.0 |
| **Endogenous gene** |  |  |
| Act-F | GCGGTCGAACAACTGGTATT | 63.7 |
| Act-R | GGTCCAAACGAAGGATAGCA | 63.8 |

**Manuscript title:** Insight into the mechanisms of terminal HS-tolerance in wheat mutant with improved nutritional quality through de novo transcriptome sequencing

**Author’s List:** Ranjeet R. Kumar, Suman Bakshi, Kavita Dubey, Sumedha Hasija, Gyanendra K. Rai, Neelu Jain, Sanjay Jambhulkar, Bhupinder Singh, Gyanendra P. Singh, & Shelly Praveen
