# Supplementary material for: Insight into the mechanisms of terminal HS-tolerance in wheat mutant with improved nutritional quality through de novo transcriptome sequencing
Source: Research Square preprint supplement (doi:10.21203/rs.3.rs-241832/v1), 2021-02-26
Supplement: Supplementary file 3 [file 2220e3934cad6b0cc74e7627.xlsx]

## Sheet: SNP_RD5
	Insight into the mechanisms of terminal HS-tolerance in wheat mutant with improved nutritional quality through de novo transcriptome sequencing Ranjeet R. Kumar, Suman Bakshi, Kavita Dubey, Sumedha Hasija, Gyanendra K. Rai, Neelu Jain, Sanjay Jambhulkar, Bhupinder Singh, Gyanendra P. Singh, & Shelly Praveen
	Table S15 List of Single Nucleotide Polymorphisms (SNPs) overlying on differentially expressed transcripts identified in wheat mutant (M3), parent (P3) and mutant exposed to HS (M3H) through de novo transcriptomic sequencing
	rs#	alleles	chrom	pos	GenBankID	RefSeqID	strand	clusterID	center	panel	QCcode	M3HSLR1_M3HSRR2_M3HSSR1_M3HSSpR1	M3HSLR2_M3HSRR2_M3HSSR2_M3HSSpR2	M3LR2_M3RR1_M3SR1_M3SpR1	M3LR2_M3RR2_M3SR2_M3SpR2	P3LR1_P3RR1_P3SR1_P3SpR1	P3LR2_P3RR2_P3SR2_P3SpR2
	UTRINITY_DN7591_c0_g1_i1_215	C/A	TRINITY_DN7591_c0_g1_i1	215	NA	NA	+	TRINITY_DN7591_c0_g1_i1	NA	NA	NA	CC	CC	CA	CA	CA	CA
	UTRINITY_DN24227_c0_g1_i4_167	G/T	TRINITY_DN24227_c0_g1_i4	167	NA	NA	+	TRINITY_DN24227_c0_g1_i4	NA	NA	NA	GG	GG	GG	GG	GT	GT
	UTRINITY_DN3581_c0_g1_i5_963	T/C	TRINITY_DN3581_c0_g1_i5	963	NA	NA	+	TRINITY_DN3581_c0_g1_i5	NA	NA	NA	TT	TT	CC	CC	TT	TT
	UTRINITY_DN9204_c0_g3_i1_635	G/A	TRINITY_DN9204_c0_g3_i1	635	NA	NA	+	TRINITY_DN9204_c0_g3_i1	NA	NA	NA	GG	GG	GG	GG	GA	GA
	UTRINITY_DN9204_c0_g3_i1_647	G/A	TRINITY_DN9204_c0_g3_i1	647	NA	NA	+	TRINITY_DN9204_c0_g3_i1	NA	NA	NA	GG	GG	GG	GG	GA	GA
	UTRINITY_DN9204_c0_g3_i1_651	C/A	TRINITY_DN9204_c0_g3_i1	651	NA	NA	+	TRINITY_DN9204_c0_g3_i1	NA	NA	NA	CC	CC	CC	CC	CA	CA
	UTRINITY_DN9204_c0_g3_i1_665	C/T	TRINITY_DN9204_c0_g3_i1	665	NA	NA	+	TRINITY_DN9204_c0_g3_i1	NA	NA	NA	CC	CC	CC	CC	CT	CT
	UTRINITY_DN45358_c0_g2_i4_143	G/A	TRINITY_DN45358_c0_g2_i4	143	NA	NA	+	TRINITY_DN45358_c0_g2_i4	NA	NA	NA	GG	GG	GG	GG	AA	AA
	UTRINITY_DN50262_c0_g1_i1_169	C/G	TRINITY_DN50262_c0_g1_i1	169	NA	NA	+	TRINITY_DN50262_c0_g1_i1	NA	NA	NA	GG	GG	GC	GC	CC	CC
	UTRINITY_DN50262_c0_g1_i1_174	A/T	TRINITY_DN50262_c0_g1_i1	174	NA	NA	+	TRINITY_DN50262_c0_g1_i1	NA	NA	NA	AA	AA	AT	AT	AA	AA
	UTRINITY_DN50262_c0_g1_i1_177	G/A	TRINITY_DN50262_c0_g1_i1	177	NA	NA	+	TRINITY_DN50262_c0_g1_i1	NA	NA	NA	GG	GG	GA	GA	GG	GG
	UTRINITY_DN50262_c0_g1_i1_188	G/T	TRINITY_DN50262_c0_g1_i1	188	NA	NA	+	TRINITY_DN50262_c0_g1_i1	NA	NA	NA	GG	GG	GT	GT	GG	GG
	UTRINITY_DN50262_c0_g1_i1_189	T/C	TRINITY_DN50262_c0_g1_i1	189	NA	NA	+	TRINITY_DN50262_c0_g1_i1	NA	NA	NA	TT	TT	TC	TC	TT	TT
	UTRINITY_DN50262_c0_g1_i1_315	A/T	TRINITY_DN50262_c0_g1_i1	315	NA	NA	+	TRINITY_DN50262_c0_g1_i1	NA	NA	NA	AA	AA	TA	TA	TA	TA
	UTRINITY_DN2666_c0_g1_i1_1028	G/T	TRINITY_DN2666_c0_g1_i1	1028	NA	NA	+	TRINITY_DN2666_c0_g1_i1	NA	NA	NA	GG	GG	GG	GG	TT	TT
	UTRINITY_DN4859_c0_g1_i3_1886	T/C	TRINITY_DN4859_c0_g1_i3	1886	NA	NA	+	TRINITY_DN4859_c0_g1_i3	NA	NA	NA	CC	CC	TT	TT	TT	TT
	UTRINITY_DN7547_c0_g1_i1_415	C/G	TRINITY_DN7547_c0_g1_i1	415	NA	NA	+	TRINITY_DN7547_c0_g1_i1	NA	NA	NA	CC	CC	CC	CC	GG	GG
	UTRINITY_DN7547_c0_g1_i1_418	A/T	TRINITY_DN7547_c0_g1_i1	418	NA	NA	+	TRINITY_DN7547_c0_g1_i1	NA	NA	NA	AA	AA	AA	AA	TT	TT
	UTRINITY_DN3289_c3_g1_i4_112	T/C	TRINITY_DN3289_c3_g1_i4	112	NA	NA	+	TRINITY_DN3289_c3_g1_i4	NA	NA	NA	TT	TT	TT	TT	CC	CC
	UTRINITY_DN3289_c3_g1_i4_253	C/G	TRINITY_DN3289_c3_g1_i4	253	NA	NA	+	TRINITY_DN3289_c3_g1_i4	NA	NA	NA	GG	GG	CC	CC	CC	CC
	UTRINITY_DN2856_c0_g1_i3_261	T/C	TRINITY_DN2856_c0_g1_i3	261	NA	NA	+	TRINITY_DN2856_c0_g1_i3	NA	NA	NA	TT	TT	TT	TT	CC	CC
	UTRINITY_DN189_c0_g2_i3_2530	A/T	TRINITY_DN189_c0_g2_i3	2530	NA	NA	+	TRINITY_DN189_c0_g2_i3	NA	NA	NA	--	--	TT	TT	AA	AA
	UTRINITY_DN9038_c0_g1_i5_652	T/C	TRINITY_DN9038_c0_g1_i5	652	NA	NA	+	TRINITY_DN9038_c0_g1_i5	NA	NA	NA	TT	TT	TT	TT	CC	CC
	UTRINITY_DN4218_c0_g1_i6_1601	A/C	TRINITY_DN4218_c0_g1_i6	1601	NA	NA	+	TRINITY_DN4218_c0_g1_i6	NA	NA	NA	AA	AA	CC	CC	AA	AA
	UTRINITY_DN6374_c0_g1_i3_515	A/G	TRINITY_DN6374_c0_g1_i3	515	NA	NA	+	TRINITY_DN6374_c0_g1_i3	NA	NA	NA	AA	AA	AA	AA	GG	GG
	UTRINITY_DN32277_c0_g1_i4_282	G/C	TRINITY_DN32277_c0_g1_i4	282	NA	NA	+	TRINITY_DN32277_c0_g1_i4	NA	NA	NA	CC	CC	GG	GG	GG	GG
	UTRINITY_DN32277_c0_g1_i4_461	G/A	TRINITY_DN32277_c0_g1_i4	461	NA	NA	+	TRINITY_DN32277_c0_g1_i4	NA	NA	NA	GG	GG	GG	GG	AA	AA
	UTRINITY_DN6870_c0_g1_i1_1278	C/T	TRINITY_DN6870_c0_g1_i1	1278	NA	NA	+	TRINITY_DN6870_c0_g1_i1	NA	NA	NA	CC	CC	CT	CT	CC	CC
	UTRINITY_DN6870_c0_g1_i1_1312	A/G	TRINITY_DN6870_c0_g1_i1	1312	NA	NA	+	TRINITY_DN6870_c0_g1_i1	NA	NA	NA	AA	AA	AG	AG	AA	AA
	UTRINITY_DN6792_c0_g1_i3_2576	C/T	TRINITY_DN6792_c0_g1_i3	2576	NA	NA	+	TRINITY_DN6792_c0_g1_i3	NA	NA	NA	CC	CC	CC	CC	TT	TT
	UTRINITY_DN6792_c0_g1_i3_2585	G/A	TRINITY_DN6792_c0_g1_i3	2585	NA	NA	+	TRINITY_DN6792_c0_g1_i3	NA	NA	NA	GG	GG	GG	GG	AA	AA
	UTRINITY_DN15709_c0_g1_i1_192	A/G	TRINITY_DN15709_c0_g1_i1	192	NA	NA	+	TRINITY_DN15709_c0_g1_i1	NA	NA	NA	AA	AA	AA	AA	GG	GG
	UTRINITY_DN14769_c0_g1_i1_191	C/A	TRINITY_DN14769_c0_g1_i1	191	NA	NA	+	TRINITY_DN14769_c0_g1_i1	NA	NA	NA	CC	CC	CC	CC	AA	AA
	UTRINITY_DN21604_c0_g1_i2_475	C/G	TRINITY_DN21604_c0_g1_i2	475	NA	NA	+	TRINITY_DN21604_c0_g1_i2	NA	NA	NA	--	--	CC	CC	GG	GG
	UTRINITY_DN25620_c0_g2_i1_420	G/C	TRINITY_DN25620_c0_g2_i1	420	NA	NA	+	TRINITY_DN25620_c0_g2_i1	NA	NA	NA	GG	GG	GG	GG	CC	CC
	UTRINITY_DN15444_c0_g1_i2_232	T/C	TRINITY_DN15444_c0_g1_i2	232	NA	NA	+	TRINITY_DN15444_c0_g1_i2	NA	NA	NA	TT	TT	TT	TT	CC	CC
	UTRINITY_DN33_c0_g2_i2_349	C/G	TRINITY_DN33_c0_g2_i2	349	NA	NA	+	TRINITY_DN33_c0_g2_i2	NA	NA	NA	CC	CC	CC	CC	CG	CG
	UTRINITY_DN33_c0_g2_i2_1189	G/C	TRINITY_DN33_c0_g2_i2	1189	NA	NA	+	TRINITY_DN33_c0_g2_i2	NA	NA	NA	GG	GG	GC	GC	GC	GC
	UTRINITY_DN33_c0_g2_i2_1208	C/G	TRINITY_DN33_c0_g2_i2	1208	NA	NA	+	TRINITY_DN33_c0_g2_i2	NA	NA	NA	CC	CC	CG	CG	CG	CG
	UTRINITY_DN33_c0_g2_i2_1330	T/C	TRINITY_DN33_c0_g2_i2	1330	NA	NA	+	TRINITY_DN33_c0_g2_i2	NA	NA	NA	TT	TT	TC	TC	TC	TC
	UTRINITY_DN33_c0_g2_i2_1340	G/T	TRINITY_DN33_c0_g2_i2	1340	NA	NA	+	TRINITY_DN33_c0_g2_i2	NA	NA	NA	GG	GG	GG	GG	GT	GT
	UTRINITY_DN33_c0_g2_i2_2013	C/A	TRINITY_DN33_c0_g2_i2	2013	NA	NA	+	TRINITY_DN33_c0_g2_i2	NA	NA	NA	CC	CC	CC	CC	CA	CA
	UTRINITY_DN33_c0_g2_i2_2779	C/T	TRINITY_DN33_c0_g2_i2	2779	NA	NA	+	TRINITY_DN33_c0_g2_i2	NA	NA	NA	CC	CC	CT	CT	CT	CT
	UTRINITY_DN5628_c0_g1_i4_571	T/G	TRINITY_DN5628_c0_g1_i4	571	NA	NA	+	TRINITY_DN5628_c0_g1_i4	NA	NA	NA	TT	TT	TT	TT	GG	GG
	UTRINITY_DN5628_c0_g1_i4_573	G/T	TRINITY_DN5628_c0_g1_i4	573	NA	NA	+	TRINITY_DN5628_c0_g1_i4	NA	NA	NA	GG	GG	GG	GG	TT	TT
	UTRINITY_DN5628_c0_g1_i4_575	T/G	TRINITY_DN5628_c0_g1_i4	575	NA	NA	+	TRINITY_DN5628_c0_g1_i4	NA	NA	NA	TT	TT	TT	TT	GG	GG
	UTRINITY_DN15268_c0_g1_i5_192	G/C	TRINITY_DN15268_c0_g1_i5	192	NA	NA	+	TRINITY_DN15268_c0_g1_i5	NA	NA	NA	GG	GG	GG	GG	CC	CC
	UTRINITY_DN7152_c0_g1_i2_1795	T/C	TRINITY_DN7152_c0_g1_i2	1795	NA	NA	+	TRINITY_DN7152_c0_g1_i2	NA	NA	NA	CC	CC	TT	TT	TT	TT
	UTRINITY_DN19930_c0_g2_i2_155	C/T	TRINITY_DN19930_c0_g2_i2	155	NA	NA	+	TRINITY_DN19930_c0_g2_i2	NA	NA	NA	CC	CC	CC	CC	CT	CT
	UTRINITY_DN61617_c0_g1_i8_291	A/G	TRINITY_DN61617_c0_g1_i8	291	NA	NA	+	TRINITY_DN61617_c0_g1_i8	NA	NA	NA	GG	GG	AA	AA	AA	AA
	UTRINITY_DN3588_c0_g1_i4_31	T/C	TRINITY_DN3588_c0_g1_i4	31	NA	NA	+	TRINITY_DN3588_c0_g1_i4	NA	NA	NA	TT	TT	CC	CC	TT	TT
	UTRINITY_DN14691_c0_g1_i5_190	G/A	TRINITY_DN14691_c0_g1_i5	190	NA	NA	+	TRINITY_DN14691_c0_g1_i5	NA	NA	NA	GG	GG	GG	GG	AA	AA
	UTRINITY_DN14691_c0_g1_i5_846	C/T	TRINITY_DN14691_c0_g1_i5	846	NA	NA	+	TRINITY_DN14691_c0_g1_i5	NA	NA	NA	CC	CC	CC	CC	TT	TT
	UTRINITY_DN14691_c0_g1_i5_989	C/A	TRINITY_DN14691_c0_g1_i5	989	NA	NA	+	TRINITY_DN14691_c0_g1_i5	NA	NA	NA	CC	CC	CC	CC	AA	AA
	UTRINITY_DN14691_c0_g1_i5_1451	A/G	TRINITY_DN14691_c0_g1_i5	1451	NA	NA	+	TRINITY_DN14691_c0_g1_i5	NA	NA	NA	GG	GG	AA	AA	AA	AA
	UTRINITY_DN14691_c0_g1_i5_1475	A/T	TRINITY_DN14691_c0_g1_i5	1475	NA	NA	+	TRINITY_DN14691_c0_g1_i5	NA	NA	NA	TT	TT	AA	AA	AA	AA
	UTRINITY_DN6037_c1_g2_i6_196	A/G	TRINITY_DN6037_c1_g2_i6	196	NA	NA	+	TRINITY_DN6037_c1_g2_i6	NA	NA	NA	AA	AA	GG	GG	AA	AA
	UTRINITY_DN35840_c1_g2_i1_71	G/A	TRINITY_DN35840_c1_g2_i1	71	NA	NA	+	TRINITY_DN35840_c1_g2_i1	NA	NA	NA	GG	GG	GG	GG	AA	AA
	UTRINITY_DN5576_c0_g1_i4_3099	A/G	TRINITY_DN5576_c0_g1_i4	3099	NA	NA	+	TRINITY_DN5576_c0_g1_i4	NA	NA	NA	AA	AA	AA	AA	GG	GG
	UTRINITY_DN5576_c0_g1_i4_3263	C/T	TRINITY_DN5576_c0_g1_i4	3263	NA	NA	+	TRINITY_DN5576_c0_g1_i4	NA	NA	NA	CC	CC	CC	CC	TT	TT
	UTRINITY_DN9826_c0_g1_i2_175	C/T	TRINITY_DN9826_c0_g1_i2	175	NA	NA	+	TRINITY_DN9826_c0_g1_i2	NA	NA	NA	CC	CC	CC	CC	CT	CT
	UTRINITY_DN869_c0_g2_i3_2630	A/T	TRINITY_DN869_c0_g2_i3	2630	NA	NA	+	TRINITY_DN869_c0_g2_i3	NA	NA	NA	AA	AA	AA	AA	TT	TT
	UTRINITY_DN2568_c0_g2_i1_2520	C/T	TRINITY_DN2568_c0_g2_i1	2520	NA	NA	+	TRINITY_DN2568_c0_g2_i1	NA	NA	NA	CT	CT	CT	CT	CC	CC
	UTRINITY_DN2568_c0_g2_i1_2532	G/C	TRINITY_DN2568_c0_g2_i1	2532	NA	NA	+	TRINITY_DN2568_c0_g2_i1	NA	NA	NA	GG	GG	GG	GG	GC	GC
	UTRINITY_DN2568_c0_g2_i1_2667	T/A	TRINITY_DN2568_c0_g2_i1	2667	NA	NA	+	TRINITY_DN2568_c0_g2_i1	NA	NA	NA	TA	TA	TA	TA	TT	TT
	UTRINITY_DN2568_c0_g2_i1_2739	T/C	TRINITY_DN2568_c0_g2_i1	2739	NA	NA	+	TRINITY_DN2568_c0_g2_i1	NA	NA	NA	TC	TC	TT	TT	TT	TT
	UTRINITY_DN2568_c0_g2_i1_2745	G/A	TRINITY_DN2568_c0_g2_i1	2745	NA	NA	+	TRINITY_DN2568_c0_g2_i1	NA	NA	NA	GA	GA	GG	GG	GA	GA
	UTRINITY_DN4069_c0_g1_i4_1541	A/C	TRINITY_DN4069_c0_g1_i4	1541	NA	NA	+	TRINITY_DN4069_c0_g1_i4	NA	NA	NA	AA	AA	AA	AA	CC	CC
	UTRINITY_DN2149_c0_g1_i4_1828	G/A	TRINITY_DN2149_c0_g1_i4	1828	NA	NA	+	TRINITY_DN2149_c0_g1_i4	NA	NA	NA	GG	GG	GG	GG	AA	AA
	UTRINITY_DN148_c0_g1_i2_2519	A/G	TRINITY_DN148_c0_g1_i2	2519	NA	NA	+	TRINITY_DN148_c0_g1_i2	NA	NA	NA	GG	GG	AA	AA	AA	AA
	UTRINITY_DN54134_c0_g1_i1_131	C/T	TRINITY_DN54134_c0_g1_i1	131	NA	NA	+	TRINITY_DN54134_c0_g1_i1	NA	NA	NA	CC	CC	CC	CC	TT	TT
	UTRINITY_DN22077_c0_g3_i1_132	A/T	TRINITY_DN22077_c0_g3_i1	132	NA	NA	+	TRINITY_DN22077_c0_g3_i1	NA	NA	NA	AA	AA	AA	AA	AT	AT
	UTRINITY_DN23438_c0_g1_i1_424	G/C	TRINITY_DN23438_c0_g1_i1	424	NA	NA	+	TRINITY_DN23438_c0_g1_i1	NA	NA	NA	GG	GG	GC	GC	GG	GG
	UTRINITY_DN23438_c0_g1_i1_425	T/C	TRINITY_DN23438_c0_g1_i1	425	NA	NA	+	TRINITY_DN23438_c0_g1_i1	NA	NA	NA	TT	TT	TC	TC	TT	TT
	UTRINITY_DN1857_c0_g1_i6_1263	C/T	TRINITY_DN1857_c0_g1_i6	1263	NA	NA	+	TRINITY_DN1857_c0_g1_i6	NA	NA	NA	CC	CC	CC	CC	TT	TT
	UTRINITY_DN110253_c1_g1_i1_182	G/C	TRINITY_DN110253_c1_g1_i1	182	NA	NA	+	TRINITY_DN110253_c1_g1_i1	NA	NA	NA	GG	GG	GG	GG	CC	CC
	UTRINITY_DN110253_c1_g1_i1_187	G/A	TRINITY_DN110253_c1_g1_i1	187	NA	NA	+	TRINITY_DN110253_c1_g1_i1	NA	NA	NA	GG	GG	GG	GG	AA	AA
	UTRINITY_DN15449_c0_g1_i3_732	T/C	TRINITY_DN15449_c0_g1_i3	732	NA	NA	+	TRINITY_DN15449_c0_g1_i3	NA	NA	NA	TT	TT	TC	TC	TT	TT
	UTRINITY_DN15449_c0_g1_i3_757	G/A	TRINITY_DN15449_c0_g1_i3	757	NA	NA	+	TRINITY_DN15449_c0_g1_i3	NA	NA	NA	GG	GG	GA	GA	GG	GG
	UTRINITY_DN14699_c0_g1_i1_5043	G/A	TRINITY_DN14699_c0_g1_i1	5043	NA	NA	+	TRINITY_DN14699_c0_g1_i1	NA	NA	NA	GG	GG	GG	GG	AA	AA
	UTRINITY_DN14699_c0_g1_i1_5044	A/G	TRINITY_DN14699_c0_g1_i1	5044	NA	NA	+	TRINITY_DN14699_c0_g1_i1	NA	NA	NA	AA	AA	AA	AA	GG	GG
	UTRINITY_DN6622_c0_g1_i10_1379	T/G	TRINITY_DN6622_c0_g1_i10	1379	NA	NA	+	TRINITY_DN6622_c0_g1_i10	NA	NA	NA	TT	TT	TT	TT	GG	GG
	UTRINITY_DN14168_c0_g1_i3_403	A/G	TRINITY_DN14168_c0_g1_i3	403	NA	NA	+	TRINITY_DN14168_c0_g1_i3	NA	NA	NA	GG	GG	AA	AA	AA	AA
	UTRINITY_DN14168_c0_g1_i3_412	G/T	TRINITY_DN14168_c0_g1_i3	412	NA	NA	+	TRINITY_DN14168_c0_g1_i3	NA	NA	NA	TT	TT	GG	GG	GG	GG
	UTRINITY_DN3138_c0_g3_i1_1133	C/A	TRINITY_DN3138_c0_g3_i1	1133	NA	NA	+	TRINITY_DN3138_c0_g3_i1	NA	NA	NA	CC	CC	CC	CC	CA	CA
	UTRINITY_DN17590_c0_g1_i2_1144	G/A	TRINITY_DN17590_c0_g1_i2	1144	NA	NA	+	TRINITY_DN17590_c0_g1_i2	NA	NA	NA	GG	GG	GA	GA	GG	GG
	UTRINITY_DN17590_c0_g1_i2_1445	C/T	TRINITY_DN17590_c0_g1_i2	1445	NA	NA	+	TRINITY_DN17590_c0_g1_i2	NA	NA	NA	CC	CC	TC	TC	TC	TC
	UTRINITY_DN17590_c0_g1_i2_1571	G/A	TRINITY_DN17590_c0_g1_i2	1571	NA	NA	+	TRINITY_DN17590_c0_g1_i2	NA	NA	NA	GG	GG	GG	GG	GA	GA
	UTRINITY_DN17590_c0_g1_i2_1574	C/T	TRINITY_DN17590_c0_g1_i2	1574	NA	NA	+	TRINITY_DN17590_c0_g1_i2	NA	NA	NA	CC	CC	CC	CC	CT	CT
	UTRINITY_DN17590_c0_g1_i2_3329	G/A	TRINITY_DN17590_c0_g1_i2	3329	NA	NA	+	TRINITY_DN17590_c0_g1_i2	NA	NA	NA	GG	GG	GG	GG	GA	GA
	UTRINITY_DN17590_c0_g1_i2_3669	T/C	TRINITY_DN17590_c0_g1_i2	3669	NA	NA	+	TRINITY_DN17590_c0_g1_i2	NA	NA	NA	TT	TT	TC	TC	TC	TC
	UTRINITY_DN17590_c0_g1_i2_4101	G/A	TRINITY_DN17590_c0_g1_i2	4101	NA	NA	+	TRINITY_DN17590_c0_g1_i2	NA	NA	NA	GG	GG	GA	GA	GA	GA
	UTRINITY_DN1225_c0_g1_i25_307	G/T	TRINITY_DN1225_c0_g1_i25	307	NA	NA	+	TRINITY_DN1225_c0_g1_i25	NA	NA	NA	GG	GG	GG	GG	GT	GT
	UTRINITY_DN1225_c0_g1_i25_386	T/C	TRINITY_DN1225_c0_g1_i25	386	NA	NA	+	TRINITY_DN1225_c0_g1_i25	NA	NA	NA	TT	TT	TT	TT	TC	TC
	UTRINITY_DN1225_c0_g1_i25_410	T/C	TRINITY_DN1225_c0_g1_i25	410	NA	NA	+	TRINITY_DN1225_c0_g1_i25	NA	NA	NA	TT	TT	TT	TT	TC	TC
	UTRINITY_DN1225_c0_g1_i25_449	A/G	TRINITY_DN1225_c0_g1_i25	449	NA	NA	+	TRINITY_DN1225_c0_g1_i25	NA	NA	NA	AA	AA	AA	AA	AG	AG
	UTRINITY_DN1225_c0_g1_i25_461	C/T	TRINITY_DN1225_c0_g1_i25	461	NA	NA	+	TRINITY_DN1225_c0_g1_i25	NA	NA	NA	CC	CC	CC	CC	CT	CT
	UTRINITY_DN1225_c0_g1_i25_473	A/T	TRINITY_DN1225_c0_g1_i25	473	NA	NA	+	TRINITY_DN1225_c0_g1_i25	NA	NA	NA	AA	AA	AA	AA	AT	AT
	UTRINITY_DN1225_c0_g1_i25_474	G/T	TRINITY_DN1225_c0_g1_i25	474	NA	NA	+	TRINITY_DN1225_c0_g1_i25	NA	NA	NA	GG	GG	GG	GG	GT	GT
	UTRINITY_DN1225_c0_g1_i25_479	A/G	TRINITY_DN1225_c0_g1_i25	479	NA	NA	+	TRINITY_DN1225_c0_g1_i25	NA	NA	NA	AA	AA	AA	AA	AG	AG
	UTRINITY_DN6945_c0_g1_i8_45	T/C	TRINITY_DN6945_c0_g1_i8	45	NA	NA	+	TRINITY_DN6945_c0_g1_i8	NA	NA	NA	TT	TT	TT	TT	CC	CC
	UTRINITY_DN35928_c0_g2_i8_2466	G/A	TRINITY_DN35928_c0_g2_i8	2466	NA	NA	+	TRINITY_DN35928_c0_g2_i8	NA	NA	NA	GG	GG	GG	GG	GA	GA
	UTRINITY_DN6701_c0_g1_i11_2218	G/A	TRINITY_DN6701_c0_g1_i11	2218	NA	NA	+	TRINITY_DN6701_c0_g1_i11	NA	NA	NA	GG	GG	GG	GG	AA	AA
	UTRINITY_DN85998_c0_g4_i1_149	T/C	TRINITY_DN85998_c0_g4_i1	149	NA	NA	+	TRINITY_DN85998_c0_g4_i1	NA	NA	NA	TT	TT	TT	TT	CC	CC
	UTRINITY_DN85998_c0_g4_i1_218	T/C	TRINITY_DN85998_c0_g4_i1	218	NA	NA	+	TRINITY_DN85998_c0_g4_i1	NA	NA	NA	TT	TT	TT	TT	CC	CC
	UTRINITY_DN6779_c0_g1_i3_1247	A/G	TRINITY_DN6779_c0_g1_i3	1247	NA	NA	+	TRINITY_DN6779_c0_g1_i3	NA	NA	NA	AA	AA	AG	AG	AG	AG
	UTRINITY_DN31495_c0_g1_i1_97	G/A	TRINITY_DN31495_c0_g1_i1	97	NA	NA	+	TRINITY_DN31495_c0_g1_i1	NA	NA	NA	GG	GG	GG	GG	AA	AA
	UTRINITY_DN46184_c0_g1_i1_87	G/A	TRINITY_DN46184_c0_g1_i1	87	NA	NA	+	TRINITY_DN46184_c0_g1_i1	NA	NA	NA	GG	GG	GG	GG	AA	AA
	UTRINITY_DN10402_c0_g3_i1_238	A/C	TRINITY_DN10402_c0_g3_i1	238	NA	NA	+	TRINITY_DN10402_c0_g3_i1	NA	NA	NA	AA	AA	AC	AC	AA	AA
	UTRINITY_DN10402_c0_g3_i1_248	C/T	TRINITY_DN10402_c0_g3_i1	248	NA	NA	+	TRINITY_DN10402_c0_g3_i1	NA	NA	NA	CC	CC	CT	CT	CC	CC
	UTRINITY_DN38374_c0_g1_i2_4347	T/C	TRINITY_DN38374_c0_g1_i2	4347	NA	NA	+	TRINITY_DN38374_c0_g1_i2	NA	NA	NA	TT	TT	TT	TT	CC	CC
	UTRINITY_DN3323_c0_g1_i5_1868	C/T	TRINITY_DN3323_c0_g1_i5	1868	NA	NA	+	TRINITY_DN3323_c0_g1_i5	NA	NA	NA	CC	CC	TC	TC	CC	CC
	UTRINITY_DN7458_c0_g1_i8_909	A/C	TRINITY_DN7458_c0_g1_i8	909	NA	NA	+	TRINITY_DN7458_c0_g1_i8	NA	NA	NA	AA	AA	AA	AA	CC	CC
	UTRINITY_DN6678_c0_g1_i5_852	A/G	TRINITY_DN6678_c0_g1_i5	852	NA	NA	+	TRINITY_DN6678_c0_g1_i5	NA	NA	NA	AA	AA	AA	AA	GG	GG
	UTRINITY_DN6678_c0_g1_i5_1246	T/C	TRINITY_DN6678_c0_g1_i5	1246	NA	NA	+	TRINITY_DN6678_c0_g1_i5	NA	NA	NA	TT	TT	TT	TT	CC	CC
	UTRINITY_DN9876_c0_g1_i4_363	T/C	TRINITY_DN9876_c0_g1_i4	363	NA	NA	+	TRINITY_DN9876_c0_g1_i4	NA	NA	NA	CC	CC	TT	TT	TT	TT
	UTRINITY_DN9420_c0_g1_i8_303	T/C	TRINITY_DN9420_c0_g1_i8	303	NA	NA	+	TRINITY_DN9420_c0_g1_i8	NA	NA	NA	TT	TT	TT	TT	CC	CC
	UTRINITY_DN4302_c0_g1_i19_1561	G/C	TRINITY_DN4302_c0_g1_i19	1561	NA	NA	+	TRINITY_DN4302_c0_g1_i19	NA	NA	NA	GG	GG	CC	CC	GG	GG
	UTRINITY_DN4302_c0_g1_i19_1562	G/A	TRINITY_DN4302_c0_g1_i19	1562	NA	NA	+	TRINITY_DN4302_c0_g1_i19	NA	NA	NA	GG	GG	AA	AA	GG	GG
	UTRINITY_DN6835_c0_g1_i10_523	C/T	TRINITY_DN6835_c0_g1_i10	523	NA	NA	+	TRINITY_DN6835_c0_g1_i10	NA	NA	NA	TT	TT	CC	CC	CC	CC
	UTRINITY_DN6835_c0_g1_i10_525	G/A	TRINITY_DN6835_c0_g1_i10	525	NA	NA	+	TRINITY_DN6835_c0_g1_i10	NA	NA	NA	AA	AA	GG	GG	GG	GG
	UTRINITY_DN6835_c0_g1_i10_526	G/A	TRINITY_DN6835_c0_g1_i10	526	NA	NA	+	TRINITY_DN6835_c0_g1_i10	NA	NA	NA	AA	AA	GG	GG	GG	GG
	UTRINITY_DN6835_c0_g1_i10_802	A/G	TRINITY_DN6835_c0_g1_i10	802	NA	NA	+	TRINITY_DN6835_c0_g1_i10	NA	NA	NA	AA	AA	AA	AA	GG	GG
	UTRINITY_DN6835_c0_g1_i10_857	C/T	TRINITY_DN6835_c0_g1_i10	857	NA	NA	+	TRINITY_DN6835_c0_g1_i10	NA	NA	NA	CC	CC	CC	CC	TT	TT
	UTRINITY_DN6835_c0_g1_i10_1082	C/T	TRINITY_DN6835_c0_g1_i10	1082	NA	NA	+	TRINITY_DN6835_c0_g1_i10	NA	NA	NA	CC	CC	CC	CC	TT	TT
	UTRINITY_DN6835_c0_g1_i10_1337	G/A	TRINITY_DN6835_c0_g1_i10	1337	NA	NA	+	TRINITY_DN6835_c0_g1_i10	NA	NA	NA	GG	GG	GG	GG	AA	AA
	UTRINITY_DN16620_c1_g1_i2_131	G/A	TRINITY_DN16620_c1_g1_i2	131	NA	NA	+	TRINITY_DN16620_c1_g1_i2	NA	NA	NA	GG	GG	GG	GG	GA	GA
	UTRINITY_DN16620_c1_g1_i2_512	C/G	TRINITY_DN16620_c1_g1_i2	512	NA	NA	+	TRINITY_DN16620_c1_g1_i2	NA	NA	NA	CC	CC	CG	CG	CG	CG
	UTRINITY_DN16620_c1_g1_i2_584	C/T	TRINITY_DN16620_c1_g1_i2	584	NA	NA	+	TRINITY_DN16620_c1_g1_i2	NA	NA	NA	CC	CC	CT	CT	CT	CT
	UTRINITY_DN16620_c1_g1_i2_605	C/T	TRINITY_DN16620_c1_g1_i2	605	NA	NA	+	TRINITY_DN16620_c1_g1_i2	NA	NA	NA	CC	CC	CT	CT	CT	CT
	UTRINITY_DN16620_c1_g1_i2_655	G/C	TRINITY_DN16620_c1_g1_i2	655	NA	NA	+	TRINITY_DN16620_c1_g1_i2	NA	NA	NA	GG	GG	GG	GG	GC	GC
	UTRINITY_DN16620_c1_g1_i2_1207	C/A	TRINITY_DN16620_c1_g1_i2	1207	NA	NA	+	TRINITY_DN16620_c1_g1_i2	NA	NA	NA	CC	CC	CC	CC	AA	AA
	UTRINITY_DN9523_c0_g2_i2_52	A/G	TRINITY_DN9523_c0_g2_i2	52	NA	NA	+	TRINITY_DN9523_c0_g2_i2	NA	NA	NA	AA	AA	AA	AA	GG	GG
	UTRINITY_DN4017_c0_g1_i8_1150	T/C	TRINITY_DN4017_c0_g1_i8	1150	NA	NA	+	TRINITY_DN4017_c0_g1_i8	NA	NA	NA	TT	TT	TC	TC	TC	TC
	UTRINITY_DN3476_c1_g2_i4_623	C/T	TRINITY_DN3476_c1_g2_i4	623	NA	NA	+	TRINITY_DN3476_c1_g2_i4	NA	NA	NA	TT	TT	CC	CC	CC	CC
	UTRINITY_DN3476_c1_g2_i4_627	C/T	TRINITY_DN3476_c1_g2_i4	627	NA	NA	+	TRINITY_DN3476_c1_g2_i4	NA	NA	NA	TT	TT	CC	CC	CC	CC
	UTRINITY_DN7291_c0_g1_i3_156	T/G	TRINITY_DN7291_c0_g1_i3	156	NA	NA	+	TRINITY_DN7291_c0_g1_i3	NA	NA	NA	TT	TT	TT	TT	GG	GG
	UTRINITY_DN40147_c0_g1_i2_99	C/T	TRINITY_DN40147_c0_g1_i2	99	NA	NA	+	TRINITY_DN40147_c0_g1_i2	NA	NA	NA	CC	CC	TT	TT	CC	CC
	UTRINITY_DN3865_c0_g1_i12_776	A/G	TRINITY_DN3865_c0_g1_i12	776	NA	NA	+	TRINITY_DN3865_c0_g1_i12	NA	NA	NA	AA	AA	AA	AA	GG	GG
	UTRINITY_DN47151_c0_g2_i1_283	G/C	TRINITY_DN47151_c0_g2_i1	283	NA	NA	+	TRINITY_DN47151_c0_g2_i1	NA	NA	NA	GG	GG	GC	GC	GG	GG
	UTRINITY_DN47151_c0_g2_i1_296	G/A	TRINITY_DN47151_c0_g2_i1	296	NA	NA	+	TRINITY_DN47151_c0_g2_i1	NA	NA	NA	GG	GG	GA	GA	GG	GG
	UTRINITY_DN47151_c0_g2_i1_340	C/T	TRINITY_DN47151_c0_g2_i1	340	NA	NA	+	TRINITY_DN47151_c0_g2_i1	NA	NA	NA	CC	CC	CC	CC	CT	CT
	UTRINITY_DN47151_c0_g2_i1_560	A/G	TRINITY_DN47151_c0_g2_i1	560	NA	NA	+	TRINITY_DN47151_c0_g2_i1	NA	NA	NA	AA	AA	AA	AA	AG	AG
	UTRINITY_DN47151_c0_g2_i1_710	C/T	TRINITY_DN47151_c0_g2_i1	710	NA	NA	+	TRINITY_DN47151_c0_g2_i1	NA	NA	NA	TT	TT	CC	CC	CC	CC
	UTRINITY_DN29957_c0_g2_i2_102	A/T	TRINITY_DN29957_c0_g2_i2	102	NA	NA	+	TRINITY_DN29957_c0_g2_i2	NA	NA	NA	AA	AA	AA	AA	TT	TT
	UTRINITY_DN3302_c0_g1_i6_2322	G/A	TRINITY_DN3302_c0_g1_i6	2322	NA	NA	+	TRINITY_DN3302_c0_g1_i6	NA	NA	NA	GG	GG	GG	GG	AA	AA
	UTRINITY_DN3302_c0_g1_i6_3159	T/C	TRINITY_DN3302_c0_g1_i6	3159	NA	NA	+	TRINITY_DN3302_c0_g1_i6	NA	NA	NA	TT	TT	TT	TT	TC	TC
	UTRINITY_DN3302_c0_g1_i6_3165	C/T	TRINITY_DN3302_c0_g1_i6	3165	NA	NA	+	TRINITY_DN3302_c0_g1_i6	NA	NA	NA	CC	CC	CC	CC	CT	CT
	UTRINITY_DN7500_c1_g1_i4_1238	C/T	TRINITY_DN7500_c1_g1_i4	1238	NA	NA	+	TRINITY_DN7500_c1_g1_i4	NA	NA	NA	CC	CC	CT	CT	CT	CT
	UTRINITY_DN7500_c1_g1_i4_1280	C/A	TRINITY_DN7500_c1_g1_i4	1280	NA	NA	+	TRINITY_DN7500_c1_g1_i4	NA	NA	NA	CC	CC	CC	CC	CA	CA
	UTRINITY_DN7500_c1_g1_i4_1303	C/T	TRINITY_DN7500_c1_g1_i4	1303	NA	NA	+	TRINITY_DN7500_c1_g1_i4	NA	NA	NA	CC	CC	CC	CC	CT	CT
	UTRINITY_DN1532_c0_g1_i4_3552	C/T	TRINITY_DN1532_c0_g1_i4	3552	NA	NA	+	TRINITY_DN1532_c0_g1_i4	NA	NA	NA	CC	CC	CC	CC	TT	TT
	UTRINITY_DN1532_c0_g1_i4_3561	C/G	TRINITY_DN1532_c0_g1_i4	3561	NA	NA	+	TRINITY_DN1532_c0_g1_i4	NA	NA	NA	CC	CC	CC	CC	GG	GG
	UTRINITY_DN316_c0_g2_i3_1436	T/C	TRINITY_DN316_c0_g2_i3	1436	NA	NA	+	TRINITY_DN316_c0_g2_i3	NA	NA	NA	TC	TC	TT	TT	TT	TT
	UTRINITY_DN316_c0_g2_i3_1451	A/G	TRINITY_DN316_c0_g2_i3	1451	NA	NA	+	TRINITY_DN316_c0_g2_i3	NA	NA	NA	AG	AG	AA	AA	AA	AA
	UTRINITY_DN316_c0_g2_i3_1719	T/A	TRINITY_DN316_c0_g2_i3	1719	NA	NA	+	TRINITY_DN316_c0_g2_i3	NA	NA	NA	TT	TT	TA	TA	TT	TT
	UTRINITY_DN316_c0_g2_i3_1721	T/C	TRINITY_DN316_c0_g2_i3	1721	NA	NA	+	TRINITY_DN316_c0_g2_i3	NA	NA	NA	TT	TT	TC	TC	TT	TT
	UTRINITY_DN4169_c0_g1_i8_546	A/G	TRINITY_DN4169_c0_g1_i8	546	NA	NA	+	TRINITY_DN4169_c0_g1_i8	NA	NA	NA	AA	AA	AA	AA	GG	GG
	UTRINITY_DN12395_c0_g1_i2_599	C/G	TRINITY_DN12395_c0_g1_i2	599	NA	NA	+	TRINITY_DN12395_c0_g1_i2	NA	NA	NA	CC	CC	GG	GG	CC	CC
	UTRINITY_DN12395_c0_g1_i2_603	A/T	TRINITY_DN12395_c0_g1_i2	603	NA	NA	+	TRINITY_DN12395_c0_g1_i2	NA	NA	NA	AA	AA	TT	TT	AA	AA
	UTRINITY_DN42173_c0_g1_i7_422	C/G	TRINITY_DN42173_c0_g1_i7	422	NA	NA	+	TRINITY_DN42173_c0_g1_i7	NA	NA	NA	GG	GG	CC	CC	CC	CC
	UTRINITY_DN12652_c0_g1_i5_41	G/A	TRINITY_DN12652_c0_g1_i5	41	NA	NA	+	TRINITY_DN12652_c0_g1_i5	NA	NA	NA	AA	AA	GG	GG	GG	GG
	UTRINITY_DN12652_c0_g1_i5_42	A/G	TRINITY_DN12652_c0_g1_i5	42	NA	NA	+	TRINITY_DN12652_c0_g1_i5	NA	NA	NA	GG	GG	AA	AA	AA	AA
	UTRINITY_DN12652_c0_g1_i5_44	T/C	TRINITY_DN12652_c0_g1_i5	44	NA	NA	+	TRINITY_DN12652_c0_g1_i5	NA	NA	NA	CC	CC	TT	TT	TT	TT
	UTRINITY_DN12652_c0_g1_i5_47	G/A	TRINITY_DN12652_c0_g1_i5	47	NA	NA	+	TRINITY_DN12652_c0_g1_i5	NA	NA	NA	AA	AA	GG	GG	GG	GG
	UTRINITY_DN12652_c0_g1_i5_63	A/G	TRINITY_DN12652_c0_g1_i5	63	NA	NA	+	TRINITY_DN12652_c0_g1_i5	NA	NA	NA	GG	GG	AA	AA	AA	AA
	UTRINITY_DN12652_c0_g1_i5_90	G/A	TRINITY_DN12652_c0_g1_i5	90	NA	NA	+	TRINITY_DN12652_c0_g1_i5	NA	NA	NA	AA	AA	GG	GG	GG	GG
	UTRINITY_DN24920_c0_g1_i3_468	A/G	TRINITY_DN24920_c0_g1_i3	468	NA	NA	+	TRINITY_DN24920_c0_g1_i3	NA	NA	NA	AA	AA	AA	AA	GG	GG
	UTRINITY_DN437_c0_g1_i2_1173	G/C	TRINITY_DN437_c0_g1_i2	1173	NA	NA	+	TRINITY_DN437_c0_g1_i2	NA	NA	NA	CC	CC	GG	GG	GG	GG
	UTRINITY_DN1693_c0_g1_i10_606	C/G	TRINITY_DN1693_c0_g1_i10	606	NA	NA	+	TRINITY_DN1693_c0_g1_i10	NA	NA	NA	CC	CC	CG	CG	CG	CG
	UTRINITY_DN1693_c0_g1_i10_635	A/G	TRINITY_DN1693_c0_g1_i10	635	NA	NA	+	TRINITY_DN1693_c0_g1_i10	NA	NA	NA	AA	AA	AG	AG	AG	AG
	UTRINITY_DN1693_c0_g1_i10_795	G/C	TRINITY_DN1693_c0_g1_i10	795	NA	NA	+	TRINITY_DN1693_c0_g1_i10	NA	NA	NA	GG	GG	GG	GG	GC	GC
	UTRINITY_DN1693_c0_g1_i10_825	T/C	TRINITY_DN1693_c0_g1_i10	825	NA	NA	+	TRINITY_DN1693_c0_g1_i10	NA	NA	NA	TT	TT	TT	TT	TC	TC
	UTRINITY_DN1693_c0_g1_i10_848	T/C	TRINITY_DN1693_c0_g1_i10	848	NA	NA	+	TRINITY_DN1693_c0_g1_i10	NA	NA	NA	TT	TT	TT	TT	TC	TC
	UTRINITY_DN1777_c0_g1_i5_1345	G/C	TRINITY_DN1777_c0_g1_i5	1345	NA	NA	+	TRINITY_DN1777_c0_g1_i5	NA	NA	NA	GG	GG	CC	CC	GG	GG
	UTRINITY_DN1777_c0_g1_i5_1353	C/G	TRINITY_DN1777_c0_g1_i5	1353	NA	NA	+	TRINITY_DN1777_c0_g1_i5	NA	NA	NA	CC	CC	GG	GG	CC	CC
	UTRINITY_DN1777_c0_g1_i5_1377	C/A	TRINITY_DN1777_c0_g1_i5	1377	NA	NA	+	TRINITY_DN1777_c0_g1_i5	NA	NA	NA	CC	CC	CC	CC	AA	AA
	UTRINITY_DN1777_c0_g1_i5_1386	C/T	TRINITY_DN1777_c0_g1_i5	1386	NA	NA	+	TRINITY_DN1777_c0_g1_i5	NA	NA	NA	CC	CC	CC	CC	TT	TT
	UTRINITY_DN1777_c0_g1_i5_1615	A/G	TRINITY_DN1777_c0_g1_i5	1615	NA	NA	+	TRINITY_DN1777_c0_g1_i5	NA	NA	NA	--	--	GG	GG	AA	AA
	UTRINITY_DN255_c0_g1_i4_1330	G/A	TRINITY_DN255_c0_g1_i4	1330	NA	NA	+	TRINITY_DN255_c0_g1_i4	NA	NA	NA	AA	AA	GG	GG	GG	GG
	UTRINITY_DN255_c0_g1_i4_1431	C/A	TRINITY_DN255_c0_g1_i4	1431	NA	NA	+	TRINITY_DN255_c0_g1_i4	NA	NA	NA	CC	CC	CC	CC	AA	AA
	UTRINITY_DN255_c0_g1_i4_1930	C/T	TRINITY_DN255_c0_g1_i4	1930	NA	NA	+	TRINITY_DN255_c0_g1_i4	NA	NA	NA	CC	CC	CC	CC	TT	TT
	UTRINITY_DN255_c0_g1_i4_1994	T/A	TRINITY_DN255_c0_g1_i4	1994	NA	NA	+	TRINITY_DN255_c0_g1_i4	NA	NA	NA	TT	TT	TT	TT	AA	AA
	UTRINITY_DN10237_c0_g1_i1_388	T/C	TRINITY_DN10237_c0_g1_i1	388	NA	NA	+	TRINITY_DN10237_c0_g1_i1	NA	NA	NA	TT	TT	TT	TT	CC	CC
	UTRINITY_DN39922_c0_g1_i1_552	G/A	TRINITY_DN39922_c0_g1_i1	552	NA	NA	+	TRINITY_DN39922_c0_g1_i1	NA	NA	NA	GG	GG	AA	AA	GG	GG
	UTRINITY_DN3177_c1_g1_i6_2044	T/A	TRINITY_DN3177_c1_g1_i6	2044	NA	NA	+	TRINITY_DN3177_c1_g1_i6	NA	NA	NA	AA	AA	TT	TT	TT	TT
	UTRINITY_DN23765_c0_g1_i5_55	T/C	TRINITY_DN23765_c0_g1_i5	55	NA	NA	+	TRINITY_DN23765_c0_g1_i5	NA	NA	NA	TT	TT	TT	TT	TC	TC
	UTRINITY_DN4315_c1_g1_i2_276	G/A	TRINITY_DN4315_c1_g1_i2	276	NA	NA	+	TRINITY_DN4315_c1_g1_i2	NA	NA	NA	GG	GG	GG	GG	AA	AA
	UTRINITY_DN10745_c0_g1_i4_272	C/A	TRINITY_DN10745_c0_g1_i4	272	NA	NA	+	TRINITY_DN10745_c0_g1_i4	NA	NA	NA	CA	CA	CA	CA	CC	CC
	UTRINITY_DN7585_c0_g1_i3_303	C/T	TRINITY_DN7585_c0_g1_i3	303	NA	NA	+	TRINITY_DN7585_c0_g1_i3	NA	NA	NA	--	--	CC	CC	CT	CT
	UTRINITY_DN4419_c0_g1_i9_1258	T/C	TRINITY_DN4419_c0_g1_i9	1258	NA	NA	+	TRINITY_DN4419_c0_g1_i9	NA	NA	NA	TT	TT	TT	TT	CC	CC
	UTRINITY_DN6267_c0_g1_i6_152	A/G	TRINITY_DN6267_c0_g1_i6	152	NA	NA	+	TRINITY_DN6267_c0_g1_i6	NA	NA	NA	GG	GG	AA	AA	AA	AA
	UTRINITY_DN6267_c0_g1_i6_154	A/G	TRINITY_DN6267_c0_g1_i6	154	NA	NA	+	TRINITY_DN6267_c0_g1_i6	NA	NA	NA	GG	GG	AA	AA	AA	AA
	UTRINITY_DN6267_c0_g1_i6_163	A/T	TRINITY_DN6267_c0_g1_i6	163	NA	NA	+	TRINITY_DN6267_c0_g1_i6	NA	NA	NA	TT	TT	AA	AA	AA	AA
	UTRINITY_DN6267_c0_g1_i6_166	G/C	TRINITY_DN6267_c0_g1_i6	166	NA	NA	+	TRINITY_DN6267_c0_g1_i6	NA	NA	NA	CC	CC	GG	GG	GG	GG
	UTRINITY_DN6267_c0_g1_i6_176	C/G	TRINITY_DN6267_c0_g1_i6	176	NA	NA	+	TRINITY_DN6267_c0_g1_i6	NA	NA	NA	GG	GG	CC	CC	CC	CC
	UTRINITY_DN38528_c1_g1_i1_322	A/G	TRINITY_DN38528_c1_g1_i1	322	NA	NA	+	TRINITY_DN38528_c1_g1_i1	NA	NA	NA	GG	GG	AA	AA	AA	AA
	UTRINITY_DN53132_c0_g1_i1_96	C/A	TRINITY_DN53132_c0_g1_i1	96	NA	NA	+	TRINITY_DN53132_c0_g1_i1	NA	NA	NA	CC	CC	CC	CC	AA	AA
	UTRINITY_DN53132_c0_g1_i1_236	C/T	TRINITY_DN53132_c0_g1_i1	236	NA	NA	+	TRINITY_DN53132_c0_g1_i1	NA	NA	NA	CC	CC	CC	CC	TT	TT
	UTRINITY_DN24244_c0_g1_i1_116	C/T	TRINITY_DN24244_c0_g1_i1	116	NA	NA	+	TRINITY_DN24244_c0_g1_i1	NA	NA	NA	CC	CC	CT	CT	CT	CT
	UTRINITY_DN5383_c0_g2_i1_606	A/C	TRINITY_DN5383_c0_g2_i1	606	NA	NA	+	TRINITY_DN5383_c0_g2_i1	NA	NA	NA	AA	AA	AA	AA	CC	CC
	UTRINITY_DN17697_c1_g2_i1_121	T/C	TRINITY_DN17697_c1_g2_i1	121	NA	NA	+	TRINITY_DN17697_c1_g2_i1	NA	NA	NA	TT	TT	TC	TC	TT	TT
	UTRINITY_DN15076_c0_g1_i3_236	C/T	TRINITY_DN15076_c0_g1_i3	236	NA	NA	+	TRINITY_DN15076_c0_g1_i3	NA	NA	NA	CC	CC	CC	CC	TT	TT
	UTRINITY_DN15076_c0_g1_i3_239	T/C	TRINITY_DN15076_c0_g1_i3	239	NA	NA	+	TRINITY_DN15076_c0_g1_i3	NA	NA	NA	TT	TT	TT	TT	CC	CC
	UTRINITY_DN17498_c0_g1_i2_142	A/G	TRINITY_DN17498_c0_g1_i2	142	NA	NA	+	TRINITY_DN17498_c0_g1_i2	NA	NA	NA	AA	AA	AG	AG	AG	AG
	UTRINITY_DN3174_c0_g2_i2_140	T/C	TRINITY_DN3174_c0_g2_i2	140	NA	NA	+	TRINITY_DN3174_c0_g2_i2	NA	NA	NA	TT	TT	TT	TT	CC	CC
	UTRINITY_DN9977_c0_g1_i1_1759	G/C	TRINITY_DN9977_c0_g1_i1	1759	NA	NA	+	TRINITY_DN9977_c0_g1_i1	NA	NA	NA	GG	GG	GC	GC	GC	GC
	UTRINITY_DN53647_c1_g2_i2_507	C/T	TRINITY_DN53647_c1_g2_i2	507	NA	NA	+	TRINITY_DN53647_c1_g2_i2	NA	NA	NA	CC	CC	CC	CC	CT	CT
	UTRINITY_DN1809_c0_g1_i5_704	A/G	TRINITY_DN1809_c0_g1_i5	704	NA	NA	+	TRINITY_DN1809_c0_g1_i5	NA	NA	NA	GG	GG	AA	AA	AA	AA
	UTRINITY_DN1809_c0_g1_i5_1258	C/T	TRINITY_DN1809_c0_g1_i5	1258	NA	NA	+	TRINITY_DN1809_c0_g1_i5	NA	NA	NA	CC	CC	CT	CT	CT	CT
	UTRINITY_DN30564_c1_g1_i2_168	T/C	TRINITY_DN30564_c1_g1_i2	168	NA	NA	+	TRINITY_DN30564_c1_g1_i2	NA	NA	NA	CC	CC	TT	TT	TT	TT
	UTRINITY_DN1283_c0_g1_i1_528	T/C	TRINITY_DN1283_c0_g1_i1	528	NA	NA	+	TRINITY_DN1283_c0_g1_i1	NA	NA	NA	TT	TT	CC	CC	TT	TT
	UTRINITY_DN11415_c1_g3_i1_1109	G/A	TRINITY_DN11415_c1_g3_i1	1109	NA	NA	+	TRINITY_DN11415_c1_g3_i1	NA	NA	NA	GG	GG	GA	GA	GG	GG
	UTRINITY_DN11415_c1_g3_i1_1385	C/T	TRINITY_DN11415_c1_g3_i1	1385	NA	NA	+	TRINITY_DN11415_c1_g3_i1	NA	NA	NA	CC	CC	CT	CT	CT	CT
	UTRINITY_DN11415_c1_g3_i1_1396	T/C	TRINITY_DN11415_c1_g3_i1	1396	NA	NA	+	TRINITY_DN11415_c1_g3_i1	NA	NA	NA	TT	TT	TC	TC	TC	TC
	UTRINITY_DN11415_c1_g3_i1_1707	G/A	TRINITY_DN11415_c1_g3_i1	1707	NA	NA	+	TRINITY_DN11415_c1_g3_i1	NA	NA	NA	GG	GG	GA	GA	GG	GG
	UTRINITY_DN4012_c0_g1_i2_491	T/C	TRINITY_DN4012_c0_g1_i2	491	NA	NA	+	TRINITY_DN4012_c0_g1_i2	NA	NA	NA	TT	TT	TT	TT	TC	TC
	UTRINITY_DN31056_c0_g1_i1_261	G/C	TRINITY_DN31056_c0_g1_i1	261	NA	NA	+	TRINITY_DN31056_c0_g1_i1	NA	NA	NA	GG	GG	GG	GG	GC	GC
	UTRINITY_DN33547_c0_g2_i1_86	G/T	TRINITY_DN33547_c0_g2_i1	86	NA	NA	+	TRINITY_DN33547_c0_g2_i1	NA	NA	NA	GG	GG	GG	GG	GT	GT
	UTRINITY_DN33547_c0_g2_i1_123	G/A	TRINITY_DN33547_c0_g2_i1	123	NA	NA	+	TRINITY_DN33547_c0_g2_i1	NA	NA	NA	GG	GG	GG	GG	GA	GA
	UTRINITY_DN33547_c0_g2_i1_131	C/T	TRINITY_DN33547_c0_g2_i1	131	NA	NA	+	TRINITY_DN33547_c0_g2_i1	NA	NA	NA	CC	CC	CC	CC	CT	CT
	UTRINITY_DN51370_c0_g1_i2_417	C/T	TRINITY_DN51370_c0_g1_i2	417	NA	NA	+	TRINITY_DN51370_c0_g1_i2	NA	NA	NA	CC	CC	CC	CC	TT	TT
	UTRINITY_DN51370_c0_g1_i2_418	G/A	TRINITY_DN51370_c0_g1_i2	418	NA	NA	+	TRINITY_DN51370_c0_g1_i2	NA	NA	NA	GG	GG	GG	GG	AA	AA
	UTRINITY_DN5664_c0_g1_i2_440	C/G	TRINITY_DN5664_c0_g1_i2	440	NA	NA	+	TRINITY_DN5664_c0_g1_i2	NA	NA	NA	GG	GG	CC	CC	CC	CC
	UTRINITY_DN5664_c0_g1_i2_448	G/C	TRINITY_DN5664_c0_g1_i2	448	NA	NA	+	TRINITY_DN5664_c0_g1_i2	NA	NA	NA	GG	GG	GG	GG	CC	CC
	UTRINITY_DN5664_c0_g1_i2_481	T/G	TRINITY_DN5664_c0_g1_i2	481	NA	NA	+	TRINITY_DN5664_c0_g1_i2	NA	NA	NA	TT	TT	TT	TT	GG	GG
	UTRINITY_DN5664_c0_g1_i2_496	A/G	TRINITY_DN5664_c0_g1_i2	496	NA	NA	+	TRINITY_DN5664_c0_g1_i2	NA	NA	NA	AA	AA	AA	AA	GG	GG
	UTRINITY_DN5664_c0_g1_i2_498	G/A	TRINITY_DN5664_c0_g1_i2	498	NA	NA	+	TRINITY_DN5664_c0_g1_i2	NA	NA	NA	GG	GG	GG	GG	AA	AA
	UTRINITY_DN5664_c0_g1_i2_511	A/G	TRINITY_DN5664_c0_g1_i2	511	NA	NA	+	TRINITY_DN5664_c0_g1_i2	NA	NA	NA	AA	AA	AA	AA	GG	GG
	UTRINITY_DN5664_c0_g1_i2_525	G/A	TRINITY_DN5664_c0_g1_i2	525	NA	NA	+	TRINITY_DN5664_c0_g1_i2	NA	NA	NA	GG	GG	GG	GG	AA	AA
	UTRINITY_DN4243_c1_g1_i17_2314	C/A	TRINITY_DN4243_c1_g1_i17	2314	NA	NA	+	TRINITY_DN4243_c1_g1_i17	NA	NA	NA	CC	CC	CC	CC	AA	AA
	UTRINITY_DN4243_c1_g1_i17_2325	C/A	TRINITY_DN4243_c1_g1_i17	2325	NA	NA	+	TRINITY_DN4243_c1_g1_i17	NA	NA	NA	CC	CC	CC	CC	AA	AA
	UTRINITY_DN4243_c1_g1_i17_2330	T/C	TRINITY_DN4243_c1_g1_i17	2330	NA	NA	+	TRINITY_DN4243_c1_g1_i17	NA	NA	NA	TT	TT	TT	TT	CC	CC
	UTRINITY_DN4243_c1_g1_i17_2391	C/G	TRINITY_DN4243_c1_g1_i17	2391	NA	NA	+	TRINITY_DN4243_c1_g1_i17	NA	NA	NA	CC	CC	GG	GG	CC	CC
	UTRINITY_DN4243_c1_g1_i17_2541	G/A	TRINITY_DN4243_c1_g1_i17	2541	NA	NA	+	TRINITY_DN4243_c1_g1_i17	NA	NA	NA	GG	GG	GG	GG	AA	AA
	UTRINITY_DN11864_c0_g1_i3_362	T/A	TRINITY_DN11864_c0_g1_i3	362	NA	NA	+	TRINITY_DN11864_c0_g1_i3	NA	NA	NA	TA	TA	TA	TA	TT	TT
	UTRINITY_DN11864_c0_g1_i3_373	C/T	TRINITY_DN11864_c0_g1_i3	373	NA	NA	+	TRINITY_DN11864_c0_g1_i3	NA	NA	NA	CT	CT	CT	CT	CC	CC
	UTRINITY_DN11864_c0_g1_i3_401	A/C	TRINITY_DN11864_c0_g1_i3	401	NA	NA	+	TRINITY_DN11864_c0_g1_i3	NA	NA	NA	AA	AA	AC	AC	AA	AA
	UTRINITY_DN11864_c0_g1_i3_432	T/C	TRINITY_DN11864_c0_g1_i3	432	NA	NA	+	TRINITY_DN11864_c0_g1_i3	NA	NA	NA	TT	TT	TC	TC	TT	TT
	UTRINITY_DN11864_c0_g1_i3_435	A/G	TRINITY_DN11864_c0_g1_i3	435	NA	NA	+	TRINITY_DN11864_c0_g1_i3	NA	NA	NA	AA	AA	AG	AG	AA	AA
	UTRINITY_DN7982_c0_g1_i3_2360	C/A	TRINITY_DN7982_c0_g1_i3	2360	NA	NA	+	TRINITY_DN7982_c0_g1_i3	NA	NA	NA	CC	CC	CC	CC	AA	AA
	UTRINITY_DN7982_c0_g1_i3_2408	G/T	TRINITY_DN7982_c0_g1_i3	2408	NA	NA	+	TRINITY_DN7982_c0_g1_i3	NA	NA	NA	GG	GG	GG	GG	TT	TT
	UTRINITY_DN7982_c0_g1_i3_2413	G/T	TRINITY_DN7982_c0_g1_i3	2413	NA	NA	+	TRINITY_DN7982_c0_g1_i3	NA	NA	NA	GG	GG	GG	GG	TT	TT
	UTRINITY_DN7982_c0_g1_i3_2417	C/T	TRINITY_DN7982_c0_g1_i3	2417	NA	NA	+	TRINITY_DN7982_c0_g1_i3	NA	NA	NA	CC	CC	CC	CC	TT	TT
	UTRINITY_DN7982_c0_g1_i3_2419	T/A	TRINITY_DN7982_c0_g1_i3	2419	NA	NA	+	TRINITY_DN7982_c0_g1_i3	NA	NA	NA	TT	TT	TT	TT	AA	AA
	UTRINITY_DN7982_c0_g1_i3_2562	T/C	TRINITY_DN7982_c0_g1_i3	2562	NA	NA	+	TRINITY_DN7982_c0_g1_i3	NA	NA	NA	TT	TT	TT	TT	CC	CC
	UTRINITY_DN7982_c0_g1_i3_2650	A/G	TRINITY_DN7982_c0_g1_i3	2650	NA	NA	+	TRINITY_DN7982_c0_g1_i3	NA	NA	NA	AA	AA	AA	AA	GG	GG
	UTRINITY_DN7982_c0_g1_i3_2731	T/C	TRINITY_DN7982_c0_g1_i3	2731	NA	NA	+	TRINITY_DN7982_c0_g1_i3	NA	NA	NA	TT	TT	TT	TT	CC	CC
	UTRINITY_DN7982_c0_g1_i3_2732	T/A	TRINITY_DN7982_c0_g1_i3	2732	NA	NA	+	TRINITY_DN7982_c0_g1_i3	NA	NA	NA	TT	TT	TT	TT	AA	AA
	UTRINITY_DN7955_c0_g1_i2_5337	G/A	TRINITY_DN7955_c0_g1_i2	5337	NA	NA	+	TRINITY_DN7955_c0_g1_i2	NA	NA	NA	GG	GG	GG	GG	AA	AA
	UTRINITY_DN7955_c0_g1_i2_5568	C/T	TRINITY_DN7955_c0_g1_i2	5568	NA	NA	+	TRINITY_DN7955_c0_g1_i2	NA	NA	NA	CC	CC	CC	CC	TT	TT
	UTRINITY_DN7955_c0_g1_i2_5569	A/G	TRINITY_DN7955_c0_g1_i2	5569	NA	NA	+	TRINITY_DN7955_c0_g1_i2	NA	NA	NA	AA	AA	AA	AA	GG	GG
	UTRINITY_DN7955_c0_g1_i2_5689	G/C	TRINITY_DN7955_c0_g1_i2	5689	NA	NA	+	TRINITY_DN7955_c0_g1_i2	NA	NA	NA	GG	GG	GG	GG	CC	CC
	UTRINITY_DN7955_c0_g1_i2_5752	C/T	TRINITY_DN7955_c0_g1_i2	5752	NA	NA	+	TRINITY_DN7955_c0_g1_i2	NA	NA	NA	CC	CC	CC	CC	TT	TT
	UTRINITY_DN7955_c0_g1_i2_5778	G/A	TRINITY_DN7955_c0_g1_i2	5778	NA	NA	+	TRINITY_DN7955_c0_g1_i2	NA	NA	NA	GG	GG	GG	GG	AA	AA
	UTRINITY_DN23820_c1_g1_i2_2800	T/C	TRINITY_DN23820_c1_g1_i2	2800	NA	NA	+	TRINITY_DN23820_c1_g1_i2	NA	NA	NA	TC	TC	TC	TC	TT	TT
	UTRINITY_DN10048_c0_g1_i10_2187	C/G	TRINITY_DN10048_c0_g1_i10	2187	NA	NA	+	TRINITY_DN10048_c0_g1_i10	NA	NA	NA	CC	CC	CC	CC	GC	GC
	UTRINITY_DN68032_c0_g1_i1_242	C/T	TRINITY_DN68032_c0_g1_i1	242	NA	NA	+	TRINITY_DN68032_c0_g1_i1	NA	NA	NA	CT	CT	CT	CT	CC	CC
	UTRINITY_DN420_c0_g2_i4_582	C/T	TRINITY_DN420_c0_g2_i4	582	NA	NA	+	TRINITY_DN420_c0_g2_i4	NA	NA	NA	CC	CC	CC	CC	TT	TT
	UTRINITY_DN420_c0_g2_i4_591	A/G	TRINITY_DN420_c0_g2_i4	591	NA	NA	+	TRINITY_DN420_c0_g2_i4	NA	NA	NA	AA	AA	AA	AA	GG	GG
	UTRINITY_DN420_c0_g2_i4_670	T/G	TRINITY_DN420_c0_g2_i4	670	NA	NA	+	TRINITY_DN420_c0_g2_i4	NA	NA	NA	TT	TT	TT	TT	GG	GG
	UTRINITY_DN420_c0_g2_i4_798	C/T	TRINITY_DN420_c0_g2_i4	798	NA	NA	+	TRINITY_DN420_c0_g2_i4	NA	NA	NA	CC	CC	CC	CC	TT	TT
	UTRINITY_DN420_c0_g2_i4_823	C/A	TRINITY_DN420_c0_g2_i4	823	NA	NA	+	TRINITY_DN420_c0_g2_i4	NA	NA	NA	CC	CC	CC	CC	AA	AA
	UTRINITY_DN14831_c0_g2_i1_556	G/C	TRINITY_DN14831_c0_g2_i1	556	NA	NA	+	TRINITY_DN14831_c0_g2_i1	NA	NA	NA	CC	CC	GG	GG	GG	GG
	UTRINITY_DN29293_c0_g2_i1_602	T/C	TRINITY_DN29293_c0_g2_i1	602	NA	NA	+	TRINITY_DN29293_c0_g2_i1	NA	NA	NA	TT	TT	TT	TT	CC	CC
	UTRINITY_DN121852_c0_g1_i1_132	G/A	TRINITY_DN121852_c0_g1_i1	132	NA	NA	+	TRINITY_DN121852_c0_g1_i1	NA	NA	NA	GG	GG	GG	GG	AA	AA
	UTRINITY_DN7273_c1_g1_i2_550	C/T	TRINITY_DN7273_c1_g1_i2	550	NA	NA	+	TRINITY_DN7273_c1_g1_i2	NA	NA	NA	TT	TT	CC	CC	CC	CC
	UTRINITY_DN11067_c0_g1_i1_694	A/G	TRINITY_DN11067_c0_g1_i1	694	NA	NA	+	TRINITY_DN11067_c0_g1_i1	NA	NA	NA	AA	AA	AA	AA	GG	GG
	UTRINITY_DN11067_c0_g1_i1_752	A/G	TRINITY_DN11067_c0_g1_i1	752	NA	NA	+	TRINITY_DN11067_c0_g1_i1	NA	NA	NA	AA	AA	AA	AA	GG	GG
	UTRINITY_DN11067_c0_g1_i1_761	A/C	TRINITY_DN11067_c0_g1_i1	761	NA	NA	+	TRINITY_DN11067_c0_g1_i1	NA	NA	NA	AA	AA	AA	AA	CC	CC
	UTRINITY_DN11067_c0_g1_i1_839	G/A	TRINITY_DN11067_c0_g1_i1	839	NA	NA	+	TRINITY_DN11067_c0_g1_i1	NA	NA	NA	GG	GG	GG	GG	AA	AA
	UTRINITY_DN18081_c0_g1_i7_692	C/G	TRINITY_DN18081_c0_g1_i7	692	NA	NA	+	TRINITY_DN18081_c0_g1_i7	NA	NA	NA	CC	CC	CC	CC	GG	GG
	UTRINITY_DN3804_c0_g2_i1_681	G/T	TRINITY_DN3804_c0_g2_i1	681	NA	NA	+	TRINITY_DN3804_c0_g2_i1	NA	NA	NA	GG	GG	GG	GG	GT	GT
	UTRINITY_DN35704_c0_g2_i1_461	T/C	TRINITY_DN35704_c0_g2_i1	461	NA	NA	+	TRINITY_DN35704_c0_g2_i1	NA	NA	NA	TT	TT	TC	TC	TC	TC
	UTRINITY_DN85765_c0_g1_i4_204	T/C	TRINITY_DN85765_c0_g1_i4	204	NA	NA	+	TRINITY_DN85765_c0_g1_i4	NA	NA	NA	TC	TC	TT	TT	TT	TT
	UTRINITY_DN7543_c0_g1_i4_1467	C/T	TRINITY_DN7543_c0_g1_i4	1467	NA	NA	+	TRINITY_DN7543_c0_g1_i4	NA	NA	NA	CC	CC	CC	CC	TT	TT
	UTRINITY_DN457_c1_g1_i7_1229	G/T	TRINITY_DN457_c1_g1_i7	1229	NA	NA	+	TRINITY_DN457_c1_g1_i7	NA	NA	NA	GG	GG	GG	GG	TT	TT
	UTRINITY_DN6896_c0_g1_i1_398	A/G	TRINITY_DN6896_c0_g1_i1	398	NA	NA	+	TRINITY_DN6896_c0_g1_i1	NA	NA	NA	AG	AG	AG	AG	AA	AA
	UTRINITY_DN129798_c1_g2_i1_97	C/G	TRINITY_DN129798_c1_g2_i1	97	NA	NA	+	TRINITY_DN129798_c1_g2_i1	NA	NA	NA	CC	CC	CC	CC	CG	CG
	UTRINITY_DN129798_c1_g2_i1_172	C/G	TRINITY_DN129798_c1_g2_i1	172	NA	NA	+	TRINITY_DN129798_c1_g2_i1	NA	NA	NA	CC	CC	CC	CC	CG	CG
	UTRINITY_DN3405_c0_g1_i3_861	A/G	TRINITY_DN3405_c0_g1_i3	861	NA	NA	+	TRINITY_DN3405_c0_g1_i3	NA	NA	NA	AA	AA	AA	AA	GG	GG
	UTRINITY_DN47702_c0_g1_i3_179	C/T	TRINITY_DN47702_c0_g1_i3	179	NA	NA	+	TRINITY_DN47702_c0_g1_i3	NA	NA	NA	CC	CC	CC	CC	CT	CT
	UTRINITY_DN611_c0_g2_i3_1424	C/T	TRINITY_DN611_c0_g2_i3	1424	NA	NA	+	TRINITY_DN611_c0_g2_i3	NA	NA	NA	CC	CC	CT	CT	CT	CT
	UTRINITY_DN2868_c0_g1_i2_1035	G/A	TRINITY_DN2868_c0_g1_i2	1035	NA	NA	+	TRINITY_DN2868_c0_g1_i2	NA	NA	NA	GG	GG	GA	GA	GG	GG
	UTRINITY_DN2868_c0_g1_i2_1166	T/C	TRINITY_DN2868_c0_g1_i2	1166	NA	NA	+	TRINITY_DN2868_c0_g1_i2	NA	NA	NA	TT	TT	TC	TC	TT	TT
	UTRINITY_DN68603_c1_g1_i1_47	A/G	TRINITY_DN68603_c1_g1_i1	47	NA	NA	+	TRINITY_DN68603_c1_g1_i1	NA	NA	NA	GG	GG	AA	AA	AA	AA
	UTRINITY_DN10414_c0_g1_i9_707	C/A	TRINITY_DN10414_c0_g1_i9	707	NA	NA	+	TRINITY_DN10414_c0_g1_i9	NA	NA	NA	AA	AA	CC	CC	CC	CC
	UTRINITY_DN10414_c0_g1_i9_711	T/C	TRINITY_DN10414_c0_g1_i9	711	NA	NA	+	TRINITY_DN10414_c0_g1_i9	NA	NA	NA	CC	CC	TT	TT	TT	TT
	UTRINITY_DN10648_c0_g1_i1_1742	A/G	TRINITY_DN10648_c0_g1_i1	1742	NA	NA	+	TRINITY_DN10648_c0_g1_i1	NA	NA	NA	AA	AA	AA	AA	GG	GG
	UTRINITY_DN10648_c0_g1_i1_1777	A/G	TRINITY_DN10648_c0_g1_i1	1777	NA	NA	+	TRINITY_DN10648_c0_g1_i1	NA	NA	NA	AA	AA	AA	AA	GG	GG
	UTRINITY_DN15123_c0_g1_i3_471	A/G	TRINITY_DN15123_c0_g1_i3	471	NA	NA	+	TRINITY_DN15123_c0_g1_i3	NA	NA	NA	AA	AA	AA	AA	GG	GG
	UTRINITY_DN4249_c0_g1_i5_1635	C/A	TRINITY_DN4249_c0_g1_i5	1635	NA	NA	+	TRINITY_DN4249_c0_g1_i5	NA	NA	NA	CC	CC	CC	CC	CA	CA
	UTRINITY_DN96122_c0_g1_i1_131	C/A	TRINITY_DN96122_c0_g1_i1	131	NA	NA	+	TRINITY_DN96122_c0_g1_i1	NA	NA	NA	CC	CC	CC	CC	CA	CA
	UTRINITY_DN96122_c0_g1_i1_344	C/G	TRINITY_DN96122_c0_g1_i1	344	NA	NA	+	TRINITY_DN96122_c0_g1_i1	NA	NA	NA	CC	CC	CC	CC	CG	CG
	UTRINITY_DN10652_c0_g1_i5_612	G/A	TRINITY_DN10652_c0_g1_i5	612	NA	NA	+	TRINITY_DN10652_c0_g1_i5	NA	NA	NA	GG	GG	AA	AA	GG	GG
	UTRINITY_DN1405_c0_g1_i1_394	G/C	TRINITY_DN1405_c0_g1_i1	394	NA	NA	+	TRINITY_DN1405_c0_g1_i1	NA	NA	NA	GC	GC	GC	GC	GG	GG
	UTRINITY_DN1405_c0_g1_i1_400	C/T	TRINITY_DN1405_c0_g1_i1	400	NA	NA	+	TRINITY_DN1405_c0_g1_i1	NA	NA	NA	CT	CT	CT	CT	CC	CC
	UTRINITY_DN1405_c0_g1_i1_544	C/G	TRINITY_DN1405_c0_g1_i1	544	NA	NA	+	TRINITY_DN1405_c0_g1_i1	NA	NA	NA	CC	CC	CC	CC	CG	CG
	UTRINITY_DN1405_c0_g1_i1_580	C/G	TRINITY_DN1405_c0_g1_i1	580	NA	NA	+	TRINITY_DN1405_c0_g1_i1	NA	NA	NA	CC	CC	CC	CC	CG	CG
	UTRINITY_DN1405_c0_g1_i1_582	C/T	TRINITY_DN1405_c0_g1_i1	582	NA	NA	+	TRINITY_DN1405_c0_g1_i1	NA	NA	NA	CC	CC	CC	CC	CT	CT
	UTRINITY_DN1405_c0_g1_i1_610	T/C	TRINITY_DN1405_c0_g1_i1	610	NA	NA	+	TRINITY_DN1405_c0_g1_i1	NA	NA	NA	TC	TC	TC	TC	TT	TT
	UTRINITY_DN1405_c0_g1_i1_612	C/G	TRINITY_DN1405_c0_g1_i1	612	NA	NA	+	TRINITY_DN1405_c0_g1_i1	NA	NA	NA	CC	CC	CC	CC	GG	GG
	UTRINITY_DN1405_c0_g1_i1_665	A/C	TRINITY_DN1405_c0_g1_i1	665	NA	NA	+	TRINITY_DN1405_c0_g1_i1	NA	NA	NA	AC	AC	AC	AC	AA	AA
	UTRINITY_DN1405_c0_g1_i1_692	A/G	TRINITY_DN1405_c0_g1_i1	692	NA	NA	+	TRINITY_DN1405_c0_g1_i1	NA	NA	NA	AG	AG	AA	AA	AA	AA
	UTRINITY_DN1405_c0_g1_i1_705	A/G	TRINITY_DN1405_c0_g1_i1	705	NA	NA	+	TRINITY_DN1405_c0_g1_i1	NA	NA	NA	AG	AG	AA	AA	AA	AA
	UTRINITY_DN1405_c0_g1_i1_731	A/G	TRINITY_DN1405_c0_g1_i1	731	NA	NA	+	TRINITY_DN1405_c0_g1_i1	NA	NA	NA	AG	AG	AG	AG	AA	AA
	UTRINITY_DN1405_c0_g1_i1_787	G/C	TRINITY_DN1405_c0_g1_i1	787	NA	NA	+	TRINITY_DN1405_c0_g1_i1	NA	NA	NA	CG	CG	CG	CG	GG	GG
	UTRINITY_DN1405_c0_g1_i1_793	G/C	TRINITY_DN1405_c0_g1_i1	793	NA	NA	+	TRINITY_DN1405_c0_g1_i1	NA	NA	NA	GG	GG	GG	GG	GC	GC
	UTRINITY_DN1405_c0_g1_i1_798	C/T	TRINITY_DN1405_c0_g1_i1	798	NA	NA	+	TRINITY_DN1405_c0_g1_i1	NA	NA	NA	TC	TC	TC	TC	CC	CC
	UTRINITY_DN1405_c0_g1_i1_824	C/T	TRINITY_DN1405_c0_g1_i1	824	NA	NA	+	TRINITY_DN1405_c0_g1_i1	NA	NA	NA	CC	CC	CC	CC	CT	CT
	UTRINITY_DN1405_c0_g1_i1_832	G/T	TRINITY_DN1405_c0_g1_i1	832	NA	NA	+	TRINITY_DN1405_c0_g1_i1	NA	NA	NA	TG	TG	TG	TG	GG	GG
	UTRINITY_DN1405_c0_g1_i1_883	C/G	TRINITY_DN1405_c0_g1_i1	883	NA	NA	+	TRINITY_DN1405_c0_g1_i1	NA	NA	NA	CC	CC	CC	CC	CG	CG
	UTRINITY_DN1405_c0_g1_i1_1024	C/T	TRINITY_DN1405_c0_g1_i1	1024	NA	NA	+	TRINITY_DN1405_c0_g1_i1	NA	NA	NA	TC	TC	TC	TC	CC	CC
	UTRINITY_DN1405_c0_g1_i1_1042	C/R	TRINITY_DN1405_c0_g1_i1	1042	NA	NA	+	TRINITY_DN1405_c0_g1_i1	NA	NA	NA	AC	AC	AC	AC	GC	GC
	UTRINITY_DN1405_c0_g1_i1_1069	C/G	TRINITY_DN1405_c0_g1_i1	1069	NA	NA	+	TRINITY_DN1405_c0_g1_i1	NA	NA	NA	CG	CG	CG	CG	CC	CC
	UTRINITY_DN1405_c0_g1_i1_1099	T/C	TRINITY_DN1405_c0_g1_i1	1099	NA	NA	+	TRINITY_DN1405_c0_g1_i1	NA	NA	NA	CT	CT	CT	CT	TT	TT
	UTRINITY_DN1405_c0_g1_i1_1368	A/G	TRINITY_DN1405_c0_g1_i1	1368	NA	NA	+	TRINITY_DN1405_c0_g1_i1	NA	NA	NA	AA	AA	AA	AA	GG	GG
	UTRINITY_DN1405_c0_g1_i1_1369	A/G	TRINITY_DN1405_c0_g1_i1	1369	NA	NA	+	TRINITY_DN1405_c0_g1_i1	NA	NA	NA	AA	AA	AA	AA	GG	GG
	UTRINITY_DN17910_c0_g1_i2_263	G/A	TRINITY_DN17910_c0_g1_i2	263	NA	NA	+	TRINITY_DN17910_c0_g1_i2	NA	NA	NA	GG	GG	GG	GG	GA	GA
	UTRINITY_DN17910_c0_g1_i2_266	C/T	TRINITY_DN17910_c0_g1_i2	266	NA	NA	+	TRINITY_DN17910_c0_g1_i2	NA	NA	NA	CC	CC	CC	CC	CT	CT
	UTRINITY_DN14791_c0_g3_i2_84	C/G	TRINITY_DN14791_c0_g3_i2	84	NA	NA	+	TRINITY_DN14791_c0_g3_i2	NA	NA	NA	CC	CC	CC	CC	GG	GG
	UTRINITY_DN14791_c0_g3_i2_88	T/C	TRINITY_DN14791_c0_g3_i2	88	NA	NA	+	TRINITY_DN14791_c0_g3_i2	NA	NA	NA	TT	TT	TT	TT	CC	CC
	UTRINITY_DN12357_c0_g1_i4_312	T/C	TRINITY_DN12357_c0_g1_i4	312	NA	NA	+	TRINITY_DN12357_c0_g1_i4	NA	NA	NA	TT	TT	TT	TT	CC	CC
	UTRINITY_DN18465_c7_g1_i1_64	T/A	TRINITY_DN18465_c7_g1_i1	64	NA	NA	+	TRINITY_DN18465_c7_g1_i1	NA	NA	NA	TT	TT	TT	TT	AA	AA
	UTRINITY_DN13237_c0_g1_i5_1136	G/A	TRINITY_DN13237_c0_g1_i5	1136	NA	NA	+	TRINITY_DN13237_c0_g1_i5	NA	NA	NA	GG	GG	GG	GG	GA	GA
	UTRINITY_DN13237_c0_g1_i5_1166	A/G	TRINITY_DN13237_c0_g1_i5	1166	NA	NA	+	TRINITY_DN13237_c0_g1_i5	NA	NA	NA	AA	AA	AA	AA	AG	AG
	UTRINITY_DN13237_c0_g1_i5_1167	C/T	TRINITY_DN13237_c0_g1_i5	1167	NA	NA	+	TRINITY_DN13237_c0_g1_i5	NA	NA	NA	CC	CC	CC	CC	CT	CT
	UTRINITY_DN710_c0_g1_i10_640	G/A	TRINITY_DN710_c0_g1_i10	640	NA	NA	+	TRINITY_DN710_c0_g1_i10	NA	NA	NA	AA	AA	GG	GG	GG	GG
	UTRINITY_DN1055_c1_g1_i1_842	C/G	TRINITY_DN1055_c1_g1_i1	842	NA	NA	+	TRINITY_DN1055_c1_g1_i1	NA	NA	NA	GG	GG	CC	CC	CC	CC
	UTRINITY_DN1055_c1_g1_i1_848	C/A	TRINITY_DN1055_c1_g1_i1	848	NA	NA	+	TRINITY_DN1055_c1_g1_i1	NA	NA	NA	AA	AA	CC	CC	CC	CC
	UTRINITY_DN1055_c1_g1_i1_854	A/G	TRINITY_DN1055_c1_g1_i1	854	NA	NA	+	TRINITY_DN1055_c1_g1_i1	NA	NA	NA	GG	GG	AA	AA	AA	AA
	UTRINITY_DN879_c0_g1_i2_24	C/T	TRINITY_DN879_c0_g1_i2	24	NA	NA	+	TRINITY_DN879_c0_g1_i2	NA	NA	NA	CC	CC	CC	CC	TT	TT
	UTRINITY_DN879_c0_g1_i2_268	A/G	TRINITY_DN879_c0_g1_i2	268	NA	NA	+	TRINITY_DN879_c0_g1_i2	NA	NA	NA	AA	AA	AA	AA	GG	GG
	UTRINITY_DN879_c0_g1_i2_305	C/T	TRINITY_DN879_c0_g1_i2	305	NA	NA	+	TRINITY_DN879_c0_g1_i2	NA	NA	NA	CC	CC	CC	CC	TT	TT
	UTRINITY_DN2286_c0_g1_i1_903	G/A	TRINITY_DN2286_c0_g1_i1	903	NA	NA	+	TRINITY_DN2286_c0_g1_i1	NA	NA	NA	GG	GG	GG	GG	AA	AA
	UTRINITY_DN2286_c0_g1_i1_905	T/C	TRINITY_DN2286_c0_g1_i1	905	NA	NA	+	TRINITY_DN2286_c0_g1_i1	NA	NA	NA	TT	TT	TT	TT	CC	CC
	UTRINITY_DN8631_c0_g1_i3_1350	G/A	TRINITY_DN8631_c0_g1_i3	1350	NA	NA	+	TRINITY_DN8631_c0_g1_i3	NA	NA	NA	GG	GG	GG	GG	GA	GA
	UTRINITY_DN8631_c0_g1_i3_1411	A/G	TRINITY_DN8631_c0_g1_i3	1411	NA	NA	+	TRINITY_DN8631_c0_g1_i3	NA	NA	NA	AA	AA	AG	AG	AG	AG
	UTRINITY_DN3620_c0_g1_i3_503	C/T	TRINITY_DN3620_c0_g1_i3	503	NA	NA	+	TRINITY_DN3620_c0_g1_i3	NA	NA	NA	CC	CC	TT	TT	CC	CC
	UTRINITY_DN35793_c0_g1_i2_131	T/S	TRINITY_DN35793_c0_g1_i2	131	NA	NA	+	TRINITY_DN35793_c0_g1_i2	NA	NA	NA	TC	TC	TG	TG	TT	TT
	UTRINITY_DN35793_c0_g1_i2_158	T/C	TRINITY_DN35793_c0_g1_i2	158	NA	NA	+	TRINITY_DN35793_c0_g1_i2	NA	NA	NA	TC	TC	TC	TC	TT	TT
	UTRINITY_DN19369_c0_g2_i1_223	C/T	TRINITY_DN19369_c0_g2_i1	223	NA	NA	+	TRINITY_DN19369_c0_g2_i1	NA	NA	NA	CT	CT	CC	CC	CC	CC
	UTRINITY_DN4456_c0_g2_i2_312	A/T	TRINITY_DN4456_c0_g2_i2	312	NA	NA	+	TRINITY_DN4456_c0_g2_i2	NA	NA	NA	AA	AA	TT	TT	AA	AA
	UTRINITY_DN12057_c0_g1_i2_462	C/T	TRINITY_DN12057_c0_g1_i2	462	NA	NA	+	TRINITY_DN12057_c0_g1_i2	NA	NA	NA	CC	CC	CT	CT	CT	CT
	UTRINITY_DN241_c0_g1_i10_1390	T/A	TRINITY_DN241_c0_g1_i10	1390	NA	NA	+	TRINITY_DN241_c0_g1_i10	NA	NA	NA	TT	TT	AA	AA	TT	TT
	UTRINITY_DN3020_c1_g1_i1_255	T/C	TRINITY_DN3020_c1_g1_i1	255	NA	NA	+	TRINITY_DN3020_c1_g1_i1	NA	NA	NA	TT	TT	TT	TT	TC	TC
	UTRINITY_DN3020_c1_g1_i1_262	G/C	TRINITY_DN3020_c1_g1_i1	262	NA	NA	+	TRINITY_DN3020_c1_g1_i1	NA	NA	NA	GG	GG	GG	GG	GC	GC
	UTRINITY_DN9209_c0_g1_i1_2593	T/A	TRINITY_DN9209_c0_g1_i1	2593	NA	NA	+	TRINITY_DN9209_c0_g1_i1	NA	NA	NA	TT	TT	TT	TT	AA	AA
	UTRINITY_DN9209_c0_g1_i1_2595	G/T	TRINITY_DN9209_c0_g1_i1	2595	NA	NA	+	TRINITY_DN9209_c0_g1_i1	NA	NA	NA	GG	GG	GG	GG	TT	TT
	UTRINITY_DN76950_c0_g1_i2_265	C/G	TRINITY_DN76950_c0_g1_i2	265	NA	NA	+	TRINITY_DN76950_c0_g1_i2	NA	NA	NA	GG	GG	CC	CC	CC	CC
	UTRINITY_DN121899_c0_g4_i1_347	G/T	TRINITY_DN121899_c0_g4_i1	347	NA	NA	+	TRINITY_DN121899_c0_g4_i1	NA	NA	NA	GG	GG	GG	GG	TT	TT
	UTRINITY_DN340_c0_g2_i2_1087	G/A	TRINITY_DN340_c0_g2_i2	1087	NA	NA	+	TRINITY_DN340_c0_g2_i2	NA	NA	NA	GG	GG	GG	GG	AA	AA
	UTRINITY_DN340_c0_g2_i2_1117	T/C	TRINITY_DN340_c0_g2_i2	1117	NA	NA	+	TRINITY_DN340_c0_g2_i2	NA	NA	NA	TT	TT	TT	TT	CC	CC
	UTRINITY_DN14354_c0_g1_i3_84	G/A	TRINITY_DN14354_c0_g1_i3	84	NA	NA	+	TRINITY_DN14354_c0_g1_i3	NA	NA	NA	GG	GG	GG	GG	AA	AA
	UTRINITY_DN14354_c0_g1_i3_91	T/C	TRINITY_DN14354_c0_g1_i3	91	NA	NA	+	TRINITY_DN14354_c0_g1_i3	NA	NA	NA	TT	TT	TT	TT	CC	CC
	UTRINITY_DN14354_c0_g1_i3_136	C/A	TRINITY_DN14354_c0_g1_i3	136	NA	NA	+	TRINITY_DN14354_c0_g1_i3	NA	NA	NA	CC	CC	CC	CC	AA	AA
	UTRINITY_DN11121_c0_g1_i5_1191	T/C	TRINITY_DN11121_c0_g1_i5	1191	NA	NA	+	TRINITY_DN11121_c0_g1_i5	NA	NA	NA	TT	TT	TT	TT	TC	TC
	UTRINITY_DN11121_c0_g1_i5_1575	A/C	TRINITY_DN11121_c0_g1_i5	1575	NA	NA	+	TRINITY_DN11121_c0_g1_i5	NA	NA	NA	AC	AC	AC	AC	AA	AA
	UTRINITY_DN11121_c0_g1_i5_1765	A/G	TRINITY_DN11121_c0_g1_i5	1765	NA	NA	+	TRINITY_DN11121_c0_g1_i5	NA	NA	NA	GA	GA	GA	GA	AA	AA
	UTRINITY_DN2375_c0_g1_i5_807	G/A	TRINITY_DN2375_c0_g1_i5	807	NA	NA	+	TRINITY_DN2375_c0_g1_i5	NA	NA	NA	GG	GG	GG	GG	AA	AA
	UTRINITY_DN2375_c0_g1_i5_814	C/T	TRINITY_DN2375_c0_g1_i5	814	NA	NA	+	TRINITY_DN2375_c0_g1_i5	NA	NA	NA	CC	CC	CC	CC	TT	TT
	UTRINITY_DN34506_c0_g1_i1_129	A/C	TRINITY_DN34506_c0_g1_i1	129	NA	NA	+	TRINITY_DN34506_c0_g1_i1	NA	NA	NA	AA	AA	AA	AA	CC	CC
	UTRINITY_DN34506_c0_g1_i1_204	C/G	TRINITY_DN34506_c0_g1_i1	204	NA	NA	+	TRINITY_DN34506_c0_g1_i1	NA	NA	NA	CC	CC	CC	CC	GG	GG
	UTRINITY_DN3770_c0_g1_i5_472	A/C	TRINITY_DN3770_c0_g1_i5	472	NA	NA	+	TRINITY_DN3770_c0_g1_i5	NA	NA	NA	CC	CC	AA	AA	AA	AA
	UTRINITY_DN29533_c0_g1_i2_136	C/T	TRINITY_DN29533_c0_g1_i2	136	NA	NA	+	TRINITY_DN29533_c0_g1_i2	NA	NA	NA	CC	CC	CC	CC	TT	TT
	UTRINITY_DN1167_c0_g1_i5_1578	G/A	TRINITY_DN1167_c0_g1_i5	1578	NA	NA	+	TRINITY_DN1167_c0_g1_i5	NA	NA	NA	GA	GA	GA	GA	GG	GG
	UTRINITY_DN21383_c0_g1_i8_1247	T/G	TRINITY_DN21383_c0_g1_i8	1247	NA	NA	+	TRINITY_DN21383_c0_g1_i8	NA	NA	NA	GG	GG	TT	TT	--	--
	UTRINITY_DN108_c2_g1_i4_545	T/C	TRINITY_DN108_c2_g1_i4	545	NA	NA	+	TRINITY_DN108_c2_g1_i4	NA	NA	NA	TT	TT	TT	TT	CC	CC
	UTRINITY_DN108_c2_g1_i4_560	A/T	TRINITY_DN108_c2_g1_i4	560	NA	NA	+	TRINITY_DN108_c2_g1_i4	NA	NA	NA	AA	AA	AA	AA	TT	TT
	UTRINITY_DN4106_c0_g1_i6_1032	C/G	TRINITY_DN4106_c0_g1_i6	1032	NA	NA	+	TRINITY_DN4106_c0_g1_i6	NA	NA	NA	GG	GG	CC	CC	CC	CC
	UTRINITY_DN22235_c0_g1_i7_233	A/C	TRINITY_DN22235_c0_g1_i7	233	NA	NA	+	TRINITY_DN22235_c0_g1_i7	NA	NA	NA	AA	AA	AC	AC	AA	AA
	UTRINITY_DN9641_c0_g1_i2_2734	G/C	TRINITY_DN9641_c0_g1_i2	2734	NA	NA	+	TRINITY_DN9641_c0_g1_i2	NA	NA	NA	CC	CC	GG	GG	GG	GG
	UTRINITY_DN20788_c0_g1_i7_1093	C/T	TRINITY_DN20788_c0_g1_i7	1093	NA	NA	+	TRINITY_DN20788_c0_g1_i7	NA	NA	NA	--	--	CT	CT	CC	CC
	UTRINITY_DN20788_c0_g1_i7_1109	T/C	TRINITY_DN20788_c0_g1_i7	1109	NA	NA	+	TRINITY_DN20788_c0_g1_i7	NA	NA	NA	--	--	TC	TC	TT	TT
	UTRINITY_DN20788_c0_g1_i7_1117	A/C	TRINITY_DN20788_c0_g1_i7	1117	NA	NA	+	TRINITY_DN20788_c0_g1_i7	NA	NA	NA	--	--	AC	AC	AA	AA
	UTRINITY_DN20788_c0_g1_i7_1129	C/T	TRINITY_DN20788_c0_g1_i7	1129	NA	NA	+	TRINITY_DN20788_c0_g1_i7	NA	NA	NA	--	--	CT	CT	CC	CC
	UTRINITY_DN15947_c0_g1_i4_207	T/A	TRINITY_DN15947_c0_g1_i4	207	NA	NA	+	TRINITY_DN15947_c0_g1_i4	NA	NA	NA	TT	TT	TT	TT	AA	AA
	UTRINITY_DN2493_c0_g1_i7_1849	T/A	TRINITY_DN2493_c0_g1_i7	1849	NA	NA	+	TRINITY_DN2493_c0_g1_i7	NA	NA	NA	AA	AA	TT	TT	TT	TT
	UTRINITY_DN2493_c0_g1_i7_1859	G/A	TRINITY_DN2493_c0_g1_i7	1859	NA	NA	+	TRINITY_DN2493_c0_g1_i7	NA	NA	NA	AA	AA	GG	GG	GG	GG
	UTRINITY_DN130458_c0_g1_i2_176	A/C	TRINITY_DN130458_c0_g1_i2	176	NA	NA	+	TRINITY_DN130458_c0_g1_i2	NA	NA	NA	AC	AC	AA	AA	AA	AA
	UTRINITY_DN4256_c0_g1_i4_639	A/G	TRINITY_DN4256_c0_g1_i4	639	NA	NA	+	TRINITY_DN4256_c0_g1_i4	NA	NA	NA	GG	GG	AA	AA	AA	AA
	UTRINITY_DN4256_c0_g1_i4_642	A/G	TRINITY_DN4256_c0_g1_i4	642	NA	NA	+	TRINITY_DN4256_c0_g1_i4	NA	NA	NA	AA	AA	GG	GG	AA	AA
	UTRINITY_DN4256_c0_g1_i4_672	C/T	TRINITY_DN4256_c0_g1_i4	672	NA	NA	+	TRINITY_DN4256_c0_g1_i4	NA	NA	NA	CC	CC	TT	TT	CC	CC
	UTRINITY_DN27095_c0_g1_i2_652	C/T	TRINITY_DN27095_c0_g1_i2	652	NA	NA	+	TRINITY_DN27095_c0_g1_i2	NA	NA	NA	CC	CC	CC	CC	CT	CT
	UTRINITY_DN9143_c1_g2_i3_436	T/G	TRINITY_DN9143_c1_g2_i3	436	NA	NA	+	TRINITY_DN9143_c1_g2_i3	NA	NA	NA	TT	TT	TG	TG	TT	TT
	UTRINITY_DN9927_c0_g1_i4_502	G/T	TRINITY_DN9927_c0_g1_i4	502	NA	NA	+	TRINITY_DN9927_c0_g1_i4	NA	NA	NA	GG	GG	GT	GT	GT	GT
	UTRINITY_DN17562_c0_g2_i1_450	G/A	TRINITY_DN17562_c0_g2_i1	450	NA	NA	+	TRINITY_DN17562_c0_g2_i1	NA	NA	NA	GG	GG	GG	GG	AA	AA
	UTRINITY_DN11281_c1_g1_i6_471	T/C	TRINITY_DN11281_c1_g1_i6	471	NA	NA	+	TRINITY_DN11281_c1_g1_i6	NA	NA	NA	TT	TT	TT	TT	CC	CC
	UTRINITY_DN11281_c1_g1_i6_564	G/A	TRINITY_DN11281_c1_g1_i6	564	NA	NA	+	TRINITY_DN11281_c1_g1_i6	NA	NA	NA	GG	GG	GG	GG	AA	AA
	UTRINITY_DN1258_c0_g1_i9_85	T/G	TRINITY_DN1258_c0_g1_i9	85	NA	NA	+	TRINITY_DN1258_c0_g1_i9	NA	NA	NA	TT	TT	GG	GG	TT	TT
	UTRINITY_DN7636_c0_g1_i5_618	G/A	TRINITY_DN7636_c0_g1_i5	618	NA	NA	+	TRINITY_DN7636_c0_g1_i5	NA	NA	NA	GG	GG	GG	GG	GA	GA
	UTRINITY_DN12811_c1_g1_i1_397	A/C	TRINITY_DN12811_c1_g1_i1	397	NA	NA	+	TRINITY_DN12811_c1_g1_i1	NA	NA	NA	AA	AA	AA	AA	CC	CC
	UTRINITY_DN6029_c0_g1_i2_417	G/A	TRINITY_DN6029_c0_g1_i2	417	NA	NA	+	TRINITY_DN6029_c0_g1_i2	NA	NA	NA	AA	AA	GG	GG	GG	GG
	UTRINITY_DN199_c0_g1_i1_250	C/G	TRINITY_DN199_c0_g1_i1	250	NA	NA	+	TRINITY_DN199_c0_g1_i1	NA	NA	NA	CC	CC	CC	CC	CG	CG
	UTRINITY_DN199_c0_g1_i1_316	G/A	TRINITY_DN199_c0_g1_i1	316	NA	NA	+	TRINITY_DN199_c0_g1_i1	NA	NA	NA	GG	GG	GA	GA	GA	GA
	UTRINITY_DN199_c0_g1_i1_336	C/G	TRINITY_DN199_c0_g1_i1	336	NA	NA	+	TRINITY_DN199_c0_g1_i1	NA	NA	NA	CC	CC	CG	CG	CG	CG
	UTRINITY_DN199_c0_g1_i1_337	A/C	TRINITY_DN199_c0_g1_i1	337	NA	NA	+	TRINITY_DN199_c0_g1_i1	NA	NA	NA	AA	AA	AC	AC	AC	AC
	UTRINITY_DN199_c0_g1_i1_384	G/C	TRINITY_DN199_c0_g1_i1	384	NA	NA	+	TRINITY_DN199_c0_g1_i1	NA	NA	NA	GG	GG	GG	GG	GC	GC
	UTRINITY_DN45946_c0_g2_i3_211	T/A	TRINITY_DN45946_c0_g2_i3	211	NA	NA	+	TRINITY_DN45946_c0_g2_i3	NA	NA	NA	AA	AA	TT	TT	TT	TT
	UTRINITY_DN45946_c0_g2_i3_227	T/G	TRINITY_DN45946_c0_g2_i3	227	NA	NA	+	TRINITY_DN45946_c0_g2_i3	NA	NA	NA	GG	GG	TT	TT	TT	TT
	UTRINITY_DN2931_c0_g2_i6_3387	G/C	TRINITY_DN2931_c0_g2_i6	3387	NA	NA	+	TRINITY_DN2931_c0_g2_i6	NA	NA	NA	GG	GG	CC	CC	GG	GG
	UTRINITY_DN43449_c0_g1_i3_206	C/T	TRINITY_DN43449_c0_g1_i3	206	NA	NA	+	TRINITY_DN43449_c0_g1_i3	NA	NA	NA	CC	CC	TT	TT	CC	CC
	UTRINITY_DN4981_c0_g1_i6_589	G/A	TRINITY_DN4981_c0_g1_i6	589	NA	NA	+	TRINITY_DN4981_c0_g1_i6	NA	NA	NA	GG	GG	GG	GG	AA	AA
	UTRINITY_DN6397_c0_g1_i4_2118	G/T	TRINITY_DN6397_c0_g1_i4	2118	NA	NA	+	TRINITY_DN6397_c0_g1_i4	NA	NA	NA	GG	GG	GT	GT	GT	GT
	UTRINITY_DN6397_c0_g1_i4_2125	T/C	TRINITY_DN6397_c0_g1_i4	2125	NA	NA	+	TRINITY_DN6397_c0_g1_i4	NA	NA	NA	TT	TT	TC	TC	TC	TC
	UTRINITY_DN6397_c0_g1_i4_2158	A/G	TRINITY_DN6397_c0_g1_i4	2158	NA	NA	+	TRINITY_DN6397_c0_g1_i4	NA	NA	NA	AA	AA	AG	AG	AG	AG
	UTRINITY_DN8153_c0_g1_i4_5171	C/T	TRINITY_DN8153_c0_g1_i4	5171	NA	NA	+	TRINITY_DN8153_c0_g1_i4	NA	NA	NA	CT	CT	CC	CC	CC	CC
	UTRINITY_DN10799_c0_g2_i1_157	A/G	TRINITY_DN10799_c0_g2_i1	157	NA	NA	+	TRINITY_DN10799_c0_g2_i1	NA	NA	NA	AA	AA	GG	GG	AA	AA
	UTRINITY_DN10799_c0_g2_i1_174	C/A	TRINITY_DN10799_c0_g2_i1	174	NA	NA	+	TRINITY_DN10799_c0_g2_i1	NA	NA	NA	CC	CC	AA	AA	CC	CC
	UTRINITY_DN56_c0_g1_i4_156	C/G	TRINITY_DN56_c0_g1_i4	156	NA	NA	+	TRINITY_DN56_c0_g1_i4	NA	NA	NA	CC	CC	CG	CG	CG	CG
	UTRINITY_DN7068_c0_g1_i9_490	C/T	TRINITY_DN7068_c0_g1_i9	490	NA	NA	+	TRINITY_DN7068_c0_g1_i9	NA	NA	NA	CC	CC	TT	TT	CC	CC
	UTRINITY_DN2401_c0_g1_i6_3000	T/C	TRINITY_DN2401_c0_g1_i6	3000	NA	NA	+	TRINITY_DN2401_c0_g1_i6	NA	NA	NA	TT	TT	TT	TT	CC	CC
	UTRINITY_DN26698_c0_g1_i8_71	C/T	TRINITY_DN26698_c0_g1_i8	71	NA	NA	+	TRINITY_DN26698_c0_g1_i8	NA	NA	NA	CC	CC	CT	CT	CT	CT
	UTRINITY_DN13063_c0_g1_i6_1472	G/A	TRINITY_DN13063_c0_g1_i6	1472	NA	NA	+	TRINITY_DN13063_c0_g1_i6	NA	NA	NA	GG	GG	GG	GG	AA	AA
	UTRINITY_DN4657_c0_g1_i2_231	C/T	TRINITY_DN4657_c0_g1_i2	231	NA	NA	+	TRINITY_DN4657_c0_g1_i2	NA	NA	NA	CC	CC	CC	CC	TT	TT
	UTRINITY_DN4657_c0_g1_i2_2329	T/C	TRINITY_DN4657_c0_g1_i2	2329	NA	NA	+	TRINITY_DN4657_c0_g1_i2	NA	NA	NA	TT	TT	TC	TC	TC	TC
	UTRINITY_DN307_c0_g1_i4_2002	G/T	TRINITY_DN307_c0_g1_i4	2002	NA	NA	+	TRINITY_DN307_c0_g1_i4	NA	NA	NA	GG	GG	TT	TT	GG	GG
	UTRINITY_DN20251_c0_g1_i4_2334	T/A	TRINITY_DN20251_c0_g1_i4	2334	NA	NA	+	TRINITY_DN20251_c0_g1_i4	NA	NA	NA	--	--	TT	TT	TA	TA
	UTRINITY_DN20251_c0_g1_i4_2353	T/A	TRINITY_DN20251_c0_g1_i4	2353	NA	NA	+	TRINITY_DN20251_c0_g1_i4	NA	NA	NA	--	--	TT	TT	TA	TA
	UTRINITY_DN20251_c0_g1_i4_2579	C/T	TRINITY_DN20251_c0_g1_i4	2579	NA	NA	+	TRINITY_DN20251_c0_g1_i4	NA	NA	NA	CC	CC	CT	CT	CC	CC
	UTRINITY_DN58354_c0_g1_i1_239	G/C	TRINITY_DN58354_c0_g1_i1	239	NA	NA	+	TRINITY_DN58354_c0_g1_i1	NA	NA	NA	GC	GC	GC	GC	GG	GG
	UTRINITY_DN17531_c0_g1_i16_165	C/T	TRINITY_DN17531_c0_g1_i16	165	NA	NA	+	TRINITY_DN17531_c0_g1_i16	NA	NA	NA	CC	CC	CC	CC	TT	TT
	UTRINITY_DN50570_c0_g1_i1_196	T/C	TRINITY_DN50570_c0_g1_i1	196	NA	NA	+	TRINITY_DN50570_c0_g1_i1	NA	NA	NA	TC	TC	TT	TT	TC	TC
	UTRINITY_DN2033_c0_g1_i1_2409	A/G	TRINITY_DN2033_c0_g1_i1	2409	NA	NA	+	TRINITY_DN2033_c0_g1_i1	NA	NA	NA	AA	AA	AA	AA	GG	GG
	UTRINITY_DN3326_c0_g3_i1_1279	T/A	TRINITY_DN3326_c0_g3_i1	1279	NA	NA	+	TRINITY_DN3326_c0_g3_i1	NA	NA	NA	TT	TT	TA	TA	TA	TA
	UTRINITY_DN3326_c0_g3_i1_1286	C/T	TRINITY_DN3326_c0_g3_i1	1286	NA	NA	+	TRINITY_DN3326_c0_g3_i1	NA	NA	NA	CC	CC	CT	CT	CT	CT
	UTRINITY_DN6392_c0_g1_i6_435	G/A	TRINITY_DN6392_c0_g1_i6	435	NA	NA	+	TRINITY_DN6392_c0_g1_i6	NA	NA	NA	GG	GG	GG	GG	AA	AA
	UTRINITY_DN6392_c0_g1_i6_585	G/A	TRINITY_DN6392_c0_g1_i6	585	NA	NA	+	TRINITY_DN6392_c0_g1_i6	NA	NA	NA	GG	GG	GG	GG	AA	AA
	UTRINITY_DN6392_c0_g1_i6_600	T/C	TRINITY_DN6392_c0_g1_i6	600	NA	NA	+	TRINITY_DN6392_c0_g1_i6	NA	NA	NA	TT	TT	TT	TT	CC	CC
	UTRINITY_DN6392_c0_g1_i6_696	C/T	TRINITY_DN6392_c0_g1_i6	696	NA	NA	+	TRINITY_DN6392_c0_g1_i6	NA	NA	NA	CC	CC	CC	CC	TT	TT
	UTRINITY_DN6392_c0_g1_i6_763	T/G	TRINITY_DN6392_c0_g1_i6	763	NA	NA	+	TRINITY_DN6392_c0_g1_i6	NA	NA	NA	TT	TT	TT	TT	GG	GG
	UTRINITY_DN6392_c0_g1_i6_784	A/G	TRINITY_DN6392_c0_g1_i6	784	NA	NA	+	TRINITY_DN6392_c0_g1_i6	NA	NA	NA	AA	AA	AA	AA	GG	GG
	UTRINITY_DN6392_c0_g1_i6_806	A/G	TRINITY_DN6392_c0_g1_i6	806	NA	NA	+	TRINITY_DN6392_c0_g1_i6	NA	NA	NA	AA	AA	AA	AA	GG	GG
	UTRINITY_DN6392_c0_g1_i6_826	T/C	TRINITY_DN6392_c0_g1_i6	826	NA	NA	+	TRINITY_DN6392_c0_g1_i6	NA	NA	NA	TT	TT	TT	TT	CC	CC
	UTRINITY_DN6392_c0_g1_i6_868	T/G	TRINITY_DN6392_c0_g1_i6	868	NA	NA	+	TRINITY_DN6392_c0_g1_i6	NA	NA	NA	TT	TT	TT	TT	GG	GG
	UTRINITY_DN6392_c0_g1_i6_871	G/A	TRINITY_DN6392_c0_g1_i6	871	NA	NA	+	TRINITY_DN6392_c0_g1_i6	NA	NA	NA	GG	GG	GG	GG	AA	AA
	UTRINITY_DN6392_c0_g1_i6_874	G/A	TRINITY_DN6392_c0_g1_i6	874	NA	NA	+	TRINITY_DN6392_c0_g1_i6	NA	NA	NA	GG	GG	GG	GG	AA	AA
	UTRINITY_DN6392_c0_g1_i6_892	A/C	TRINITY_DN6392_c0_g1_i6	892	NA	NA	+	TRINITY_DN6392_c0_g1_i6	NA	NA	NA	AA	AA	AA	AA	CC	CC
	UTRINITY_DN6392_c0_g1_i6_898	A/G	TRINITY_DN6392_c0_g1_i6	898	NA	NA	+	TRINITY_DN6392_c0_g1_i6	NA	NA	NA	AA	AA	AA	AA	GG	GG
	UTRINITY_DN6392_c0_g1_i6_957	C/G	TRINITY_DN6392_c0_g1_i6	957	NA	NA	+	TRINITY_DN6392_c0_g1_i6	NA	NA	NA	CC	CC	CC	CC	GG	GG
	UTRINITY_DN14307_c0_g1_i7_2937	A/C	TRINITY_DN14307_c0_g1_i7	2937	NA	NA	+	TRINITY_DN14307_c0_g1_i7	NA	NA	NA	AA	AA	AA	AA	CC	CC
	UTRINITY_DN16986_c0_g1_i4_755	T/C	TRINITY_DN16986_c0_g1_i4	755	NA	NA	+	TRINITY_DN16986_c0_g1_i4	NA	NA	NA	TT	TT	CC	CC	TT	TT
	UTRINITY_DN37375_c0_g1_i1_269	C/A	TRINITY_DN37375_c0_g1_i1	269	NA	NA	+	TRINITY_DN37375_c0_g1_i1	NA	NA	NA	CC	CC	CC	CC	CA	CA
	UTRINITY_DN37375_c0_g1_i1_270	G/T	TRINITY_DN37375_c0_g1_i1	270	NA	NA	+	TRINITY_DN37375_c0_g1_i1	NA	NA	NA	GG	GG	GG	GG	GT	GT
	UTRINITY_DN4304_c0_g1_i6_820	G/A	TRINITY_DN4304_c0_g1_i6	820	NA	NA	+	TRINITY_DN4304_c0_g1_i6	NA	NA	NA	GG	GG	GG	GG	GA	GA
	UTRINITY_DN34279_c0_g1_i1_187	A/G	TRINITY_DN34279_c0_g1_i1	187	NA	NA	+	TRINITY_DN34279_c0_g1_i1	NA	NA	NA	AA	AA	AA	AA	AG	AG
	UTRINITY_DN93842_c0_g1_i1_259	A/C	TRINITY_DN93842_c0_g1_i1	259	NA	NA	+	TRINITY_DN93842_c0_g1_i1	NA	NA	NA	AA	AA	CC	CC	AA	AA
	UTRINITY_DN17026_c0_g2_i1_1039	A/G	TRINITY_DN17026_c0_g2_i1	1039	NA	NA	+	TRINITY_DN17026_c0_g2_i1	NA	NA	NA	AA	AA	AA	AA	GG	GG
	UTRINITY_DN17026_c0_g2_i1_1154	T/C	TRINITY_DN17026_c0_g2_i1	1154	NA	NA	+	TRINITY_DN17026_c0_g2_i1	NA	NA	NA	TT	TT	TT	TT	CC	CC
	UTRINITY_DN32425_c0_g1_i2_612	C/A	TRINITY_DN32425_c0_g1_i2	612	NA	NA	+	TRINITY_DN32425_c0_g1_i2	NA	NA	NA	CC	CC	CC	CC	CA	CA
	UTRINITY_DN2599_c1_g1_i4_764	G/C	TRINITY_DN2599_c1_g1_i4	764	NA	NA	+	TRINITY_DN2599_c1_g1_i4	NA	NA	NA	GG	GG	GG	GG	CC	CC
	UTRINITY_DN2599_c1_g1_i4_766	A/T	TRINITY_DN2599_c1_g1_i4	766	NA	NA	+	TRINITY_DN2599_c1_g1_i4	NA	NA	NA	AA	AA	AA	AA	TT	TT
	UTRINITY_DN6554_c0_g2_i7_331	G/C	TRINITY_DN6554_c0_g2_i7	331	NA	NA	+	TRINITY_DN6554_c0_g2_i7	NA	NA	NA	CC	CC	GG	GG	GG	GG
	UTRINITY_DN80018_c1_g1_i1_224	C/A	TRINITY_DN80018_c1_g1_i1	224	NA	NA	+	TRINITY_DN80018_c1_g1_i1	NA	NA	NA	CC	CC	CC	CC	AA	AA
	UTRINITY_DN8954_c1_g1_i3_2144	T/C	TRINITY_DN8954_c1_g1_i3	2144	NA	NA	+	TRINITY_DN8954_c1_g1_i3	NA	NA	NA	TT	TT	TT	TT	CC	CC
	UTRINITY_DN14781_c1_g1_i1_83	T/A	TRINITY_DN14781_c1_g1_i1	83	NA	NA	+	TRINITY_DN14781_c1_g1_i1	NA	NA	NA	TT	TT	TT	TT	AA	AA
	UTRINITY_DN8586_c0_g1_i1_378	A/C	TRINITY_DN8586_c0_g1_i1	378	NA	NA	+	TRINITY_DN8586_c0_g1_i1	NA	NA	NA	AA	AA	AA	AA	AC	AC
	UTRINITY_DN8586_c0_g1_i1_437	A/G	TRINITY_DN8586_c0_g1_i1	437	NA	NA	+	TRINITY_DN8586_c0_g1_i1	NA	NA	NA	AA	AA	AA	AA	GA	GA
	UTRINITY_DN8586_c0_g1_i1_480	C/T	TRINITY_DN8586_c0_g1_i1	480	NA	NA	+	TRINITY_DN8586_c0_g1_i1	NA	NA	NA	CC	CC	CC	CC	CT	CT
	UTRINITY_DN8586_c0_g1_i1_492	A/C	TRINITY_DN8586_c0_g1_i1	492	NA	NA	+	TRINITY_DN8586_c0_g1_i1	NA	NA	NA	AA	AA	AA	AA	AC	AC
	UTRINITY_DN8586_c0_g1_i1_534	A/C	TRINITY_DN8586_c0_g1_i1	534	NA	NA	+	TRINITY_DN8586_c0_g1_i1	NA	NA	NA	AA	AA	AA	AA	AC	AC
	UTRINITY_DN8586_c0_g1_i1_539	A/G	TRINITY_DN8586_c0_g1_i1	539	NA	NA	+	TRINITY_DN8586_c0_g1_i1	NA	NA	NA	AA	AA	AA	AA	AG	AG
	UTRINITY_DN5786_c0_g1_i1_279	C/G	TRINITY_DN5786_c0_g1_i1	279	NA	NA	+	TRINITY_DN5786_c0_g1_i1	NA	NA	NA	CC	CC	GG	GG	CC	CC
	UTRINITY_DN4996_c0_g1_i3_1263	G/T	TRINITY_DN4996_c0_g1_i3	1263	NA	NA	+	TRINITY_DN4996_c0_g1_i3	NA	NA	NA	GG	GG	GT	GT	GT	GT
	UTRINITY_DN4996_c0_g1_i3_1499	T/A	TRINITY_DN4996_c0_g1_i3	1499	NA	NA	+	TRINITY_DN4996_c0_g1_i3	NA	NA	NA	TT	TT	TT	TT	TA	TA
	UTRINITY_DN738_c0_g1_i5_892	A/T	TRINITY_DN738_c0_g1_i5	892	NA	NA	+	TRINITY_DN738_c0_g1_i5	NA	NA	NA	AA	AA	AA	AA	TT	TT
	UTRINITY_DN738_c0_g1_i5_985	C/A	TRINITY_DN738_c0_g1_i5	985	NA	NA	+	TRINITY_DN738_c0_g1_i5	NA	NA	NA	CC	CC	CC	CC	AA	AA
	UTRINITY_DN9875_c0_g1_i11_3198	T/C	TRINITY_DN9875_c0_g1_i11	3198	NA	NA	+	TRINITY_DN9875_c0_g1_i11	NA	NA	NA	TT	TT	TC	TC	TT	TT
	UTRINITY_DN9875_c0_g1_i11_3203	C/T	TRINITY_DN9875_c0_g1_i11	3203	NA	NA	+	TRINITY_DN9875_c0_g1_i11	NA	NA	NA	CC	CC	CT	CT	CC	CC
	UTRINITY_DN9875_c0_g1_i11_3204	T/A	TRINITY_DN9875_c0_g1_i11	3204	NA	NA	+	TRINITY_DN9875_c0_g1_i11	NA	NA	NA	TT	TT	TA	TA	TT	TT
	UTRINITY_DN9875_c0_g1_i11_3370	T/C	TRINITY_DN9875_c0_g1_i11	3370	NA	NA	+	TRINITY_DN9875_c0_g1_i11	NA	NA	NA	TC	TC	TC	TC	TT	TT
	UTRINITY_DN9875_c0_g1_i11_3662	A/T	TRINITY_DN9875_c0_g1_i11	3662	NA	NA	+	TRINITY_DN9875_c0_g1_i11	NA	NA	NA	AA	AA	AA	AA	AT	AT
	UTRINITY_DN9875_c0_g1_i11_3670	G/T	TRINITY_DN9875_c0_g1_i11	3670	NA	NA	+	TRINITY_DN9875_c0_g1_i11	NA	NA	NA	GG	GG	GG	GG	GT	GT
	UTRINITY_DN9875_c0_g1_i11_3675	T/A	TRINITY_DN9875_c0_g1_i11	3675	NA	NA	+	TRINITY_DN9875_c0_g1_i11	NA	NA	NA	TT	TT	TT	TT	TA	TA
	UTRINITY_DN9875_c0_g1_i11_4274	C/T	TRINITY_DN9875_c0_g1_i11	4274	NA	NA	+	TRINITY_DN9875_c0_g1_i11	NA	NA	NA	CC	CC	CT	CT	CC	CC
	UTRINITY_DN9875_c0_g1_i11_4300	G/C	TRINITY_DN9875_c0_g1_i11	4300	NA	NA	+	TRINITY_DN9875_c0_g1_i11	NA	NA	NA	GC	GC	GG	GG	GG	GG
	UTRINITY_DN11890_c0_g1_i10_547	A/G	TRINITY_DN11890_c0_g1_i10	547	NA	NA	+	TRINITY_DN11890_c0_g1_i10	NA	NA	NA	GG	GG	AA	AA	AA	AA
	UTRINITY_DN11890_c0_g1_i10_549	C/G	TRINITY_DN11890_c0_g1_i10	549	NA	NA	+	TRINITY_DN11890_c0_g1_i10	NA	NA	NA	CC	CC	GG	GG	CC	CC
	UTRINITY_DN2702_c0_g2_i6_543	G/A	TRINITY_DN2702_c0_g2_i6	543	NA	NA	+	TRINITY_DN2702_c0_g2_i6	NA	NA	NA	GA	GA	GG	GG	GG	GG
	UTRINITY_DN2702_c0_g2_i6_581	T/C	TRINITY_DN2702_c0_g2_i6	581	NA	NA	+	TRINITY_DN2702_c0_g2_i6	NA	NA	NA	TC	TC	TT	TT	TT	TT
	UTRINITY_DN2702_c0_g2_i6_629	C/A	TRINITY_DN2702_c0_g2_i6	629	NA	NA	+	TRINITY_DN2702_c0_g2_i6	NA	NA	NA	CA	CA	CC	CC	CC	CC
	UTRINITY_DN2702_c0_g2_i6_680	T/G	TRINITY_DN2702_c0_g2_i6	680	NA	NA	+	TRINITY_DN2702_c0_g2_i6	NA	NA	NA	TG	TG	TT	TT	TT	TT
	UTRINITY_DN2702_c0_g2_i6_736	A/T	TRINITY_DN2702_c0_g2_i6	736	NA	NA	+	TRINITY_DN2702_c0_g2_i6	NA	NA	NA	AT	AT	AA	AA	AA	AA
	UTRINITY_DN20882_c0_g1_i2_290	T/C	TRINITY_DN20882_c0_g1_i2	290	NA	NA	+	TRINITY_DN20882_c0_g1_i2	NA	NA	NA	TT	TT	CC	CC	CT	CT
	UTRINITY_DN630_c0_g1_i4_225	A/C	TRINITY_DN630_c0_g1_i4	225	NA	NA	+	TRINITY_DN630_c0_g1_i4	NA	NA	NA	AA	AA	CC	CC	AA	AA
	UTRINITY_DN268_c0_g1_i5_917	G/A	TRINITY_DN268_c0_g1_i5	917	NA	NA	+	TRINITY_DN268_c0_g1_i5	NA	NA	NA	GG	GG	GG	GG	AA	AA
	UTRINITY_DN5227_c0_g1_i7_470	A/G	TRINITY_DN5227_c0_g1_i7	470	NA	NA	+	TRINITY_DN5227_c0_g1_i7	NA	NA	NA	AG	AG	AA	AA	AA	AA
	UTRINITY_DN1366_c0_g1_i9_653	G/T	TRINITY_DN1366_c0_g1_i9	653	NA	NA	+	TRINITY_DN1366_c0_g1_i9	NA	NA	NA	GG	GG	GT	GT	GT	GT
	UTRINITY_DN1366_c0_g1_i9_709	T/A	TRINITY_DN1366_c0_g1_i9	709	NA	NA	+	TRINITY_DN1366_c0_g1_i9	NA	NA	NA	TT	TT	TA	TA	TA	TA
	UTRINITY_DN1366_c0_g1_i9_710	C/G	TRINITY_DN1366_c0_g1_i9	710	NA	NA	+	TRINITY_DN1366_c0_g1_i9	NA	NA	NA	CC	CC	CG	CG	CG	CG
	UTRINITY_DN1366_c0_g1_i9_719	A/G	TRINITY_DN1366_c0_g1_i9	719	NA	NA	+	TRINITY_DN1366_c0_g1_i9	NA	NA	NA	AA	AA	AG	AG	AG	AG
	UTRINITY_DN1366_c0_g1_i9_796	T/C	TRINITY_DN1366_c0_g1_i9	796	NA	NA	+	TRINITY_DN1366_c0_g1_i9	NA	NA	NA	TT	TT	TT	TT	CC	CC
	UTRINITY_DN3293_c0_g1_i4_520	A/G	TRINITY_DN3293_c0_g1_i4	520	NA	NA	+	TRINITY_DN3293_c0_g1_i4	NA	NA	NA	GG	GG	AA	AA	AA	AA
	UTRINITY_DN2337_c0_g1_i9_697	A/G	TRINITY_DN2337_c0_g1_i9	697	NA	NA	+	TRINITY_DN2337_c0_g1_i9	NA	NA	NA	AA	AA	GG	GG	AA	AA
	UTRINITY_DN3099_c0_g2_i6_1399	C/T	TRINITY_DN3099_c0_g2_i6	1399	NA	NA	+	TRINITY_DN3099_c0_g2_i6	NA	NA	NA	CC	CC	CT	CT	CC	CC
	UTRINITY_DN3099_c0_g2_i6_1405	C/G	TRINITY_DN3099_c0_g2_i6	1405	NA	NA	+	TRINITY_DN3099_c0_g2_i6	NA	NA	NA	CC	CC	CG	CG	CC	CC
	UTRINITY_DN27155_c0_g1_i3_113	A/G	TRINITY_DN27155_c0_g1_i3	113	NA	NA	+	TRINITY_DN27155_c0_g1_i3	NA	NA	NA	--	--	GG	GG	AA	AA
	UTRINITY_DN18288_c0_g2_i1_115	C/T	TRINITY_DN18288_c0_g2_i1	115	NA	NA	+	TRINITY_DN18288_c0_g2_i1	NA	NA	NA	CC	CC	CC	CC	TT	TT
	UTRINITY_DN8670_c0_g1_i4_547	T/G	TRINITY_DN8670_c0_g1_i4	547	NA	NA	+	TRINITY_DN8670_c0_g1_i4	NA	NA	NA	TT	TT	TT	TT	GG	GG
	UTRINITY_DN1269_c0_g1_i8_1035	T/C	TRINITY_DN1269_c0_g1_i8	1035	NA	NA	+	TRINITY_DN1269_c0_g1_i8	NA	NA	NA	TT	TT	TT	TT	CC	CC
	UTRINITY_DN1269_c0_g1_i8_1109	G/A	TRINITY_DN1269_c0_g1_i8	1109	NA	NA	+	TRINITY_DN1269_c0_g1_i8	NA	NA	NA	GG	GG	GG	GG	AA	AA
	UTRINITY_DN1269_c0_g1_i8_1160	T/G	TRINITY_DN1269_c0_g1_i8	1160	NA	NA	+	TRINITY_DN1269_c0_g1_i8	NA	NA	NA	TT	TT	TT	TT	GG	GG
	UTRINITY_DN1269_c0_g1_i8_1176	T/C	TRINITY_DN1269_c0_g1_i8	1176	NA	NA	+	TRINITY_DN1269_c0_g1_i8	NA	NA	NA	TT	TT	TT	TT	CC	CC
	UTRINITY_DN1269_c0_g1_i8_1204	C/T	TRINITY_DN1269_c0_g1_i8	1204	NA	NA	+	TRINITY_DN1269_c0_g1_i8	NA	NA	NA	CC	CC	CC	CC	TT	TT
	UTRINITY_DN1269_c0_g1_i8_1230	G/A	TRINITY_DN1269_c0_g1_i8	1230	NA	NA	+	TRINITY_DN1269_c0_g1_i8	NA	NA	NA	GG	GG	GG	GG	AA	AA
	UTRINITY_DN1269_c0_g1_i8_1243	G/T	TRINITY_DN1269_c0_g1_i8	1243	NA	NA	+	TRINITY_DN1269_c0_g1_i8	NA	NA	NA	GG	GG	GG	GG	TT	TT
	UTRINITY_DN1269_c0_g1_i8_1412	G/A	TRINITY_DN1269_c0_g1_i8	1412	NA	NA	+	TRINITY_DN1269_c0_g1_i8	NA	NA	NA	GG	GG	GG	GG	AA	AA
	UTRINITY_DN1269_c0_g1_i8_1420	G/A	TRINITY_DN1269_c0_g1_i8	1420	NA	NA	+	TRINITY_DN1269_c0_g1_i8	NA	NA	NA	GG	GG	GG	GG	AA	AA
	UTRINITY_DN604_c0_g2_i4_1747	C/T	TRINITY_DN604_c0_g2_i4	1747	NA	NA	+	TRINITY_DN604_c0_g2_i4	NA	NA	NA	CC	CC	CC	CC	TT	TT
	UTRINITY_DN604_c0_g2_i4_2012	T/G	TRINITY_DN604_c0_g2_i4	2012	NA	NA	+	TRINITY_DN604_c0_g2_i4	NA	NA	NA	TT	TT	TT	TT	GG	GG
	UTRINITY_DN604_c0_g2_i4_2018	C/T	TRINITY_DN604_c0_g2_i4	2018	NA	NA	+	TRINITY_DN604_c0_g2_i4	NA	NA	NA	CC	CC	CC	CC	TT	TT
	UTRINITY_DN604_c0_g2_i4_2033	C/T	TRINITY_DN604_c0_g2_i4	2033	NA	NA	+	TRINITY_DN604_c0_g2_i4	NA	NA	NA	CC	CC	CC	CC	TT	TT
	UTRINITY_DN604_c0_g2_i4_2041	A/G	TRINITY_DN604_c0_g2_i4	2041	NA	NA	+	TRINITY_DN604_c0_g2_i4	NA	NA	NA	AA	AA	AA	AA	GG	GG
	UTRINITY_DN7325_c1_g2_i1_681	C/G	TRINITY_DN7325_c1_g2_i1	681	NA	NA	+	TRINITY_DN7325_c1_g2_i1	NA	NA	NA	CC	CC	CC	CC	CG	CG
	UTRINITY_DN7325_c1_g2_i1_714	C/A	TRINITY_DN7325_c1_g2_i1	714	NA	NA	+	TRINITY_DN7325_c1_g2_i1	NA	NA	NA	CA	CA	CA	CA	CC	CC
	UTRINITY_DN7325_c1_g2_i1_720	T/C	TRINITY_DN7325_c1_g2_i1	720	NA	NA	+	TRINITY_DN7325_c1_g2_i1	NA	NA	NA	TC	TC	TC	TC	TT	TT
	UTRINITY_DN7325_c1_g2_i1_864	C/T	TRINITY_DN7325_c1_g2_i1	864	NA	NA	+	TRINITY_DN7325_c1_g2_i1	NA	NA	NA	CT	CT	CT	CT	CC	CC
	UTRINITY_DN7325_c1_g2_i1_939	C/T	TRINITY_DN7325_c1_g2_i1	939	NA	NA	+	TRINITY_DN7325_c1_g2_i1	NA	NA	NA	CC	CC	TC	TC	CC	CC
	UTRINITY_DN7325_c1_g2_i1_1058	C/T	TRINITY_DN7325_c1_g2_i1	1058	NA	NA	+	TRINITY_DN7325_c1_g2_i1	NA	NA	NA	TC	TC	TC	TC	CC	CC
	UTRINITY_DN15337_c0_g1_i12_884	T/C	TRINITY_DN15337_c0_g1_i12	884	NA	NA	+	TRINITY_DN15337_c0_g1_i12	NA	NA	NA	TT	TT	TT	TT	CC	CC
	UTRINITY_DN15602_c0_g1_i2_379	A/G	TRINITY_DN15602_c0_g1_i2	379	NA	NA	+	TRINITY_DN15602_c0_g1_i2	NA	NA	NA	AA	AA	AG	AG	AA	AA
	UTRINITY_DN15602_c0_g1_i2_384	G/A	TRINITY_DN15602_c0_g1_i2	384	NA	NA	+	TRINITY_DN15602_c0_g1_i2	NA	NA	NA	GG	GG	GA	GA	GG	GG
	UTRINITY_DN15602_c0_g1_i2_388	C/T	TRINITY_DN15602_c0_g1_i2	388	NA	NA	+	TRINITY_DN15602_c0_g1_i2	NA	NA	NA	CC	CC	CT	CT	CC	CC
	UTRINITY_DN15602_c0_g1_i2_398	A/G	TRINITY_DN15602_c0_g1_i2	398	NA	NA	+	TRINITY_DN15602_c0_g1_i2	NA	NA	NA	AA	AA	AG	AG	AA	AA
	UTRINITY_DN20996_c0_g1_i7_223	G/C	TRINITY_DN20996_c0_g1_i7	223	NA	NA	+	TRINITY_DN20996_c0_g1_i7	NA	NA	NA	GG	GG	GG	GG	CC	CC
	UTRINITY_DN14201_c0_g1_i4_233	T/C	TRINITY_DN14201_c0_g1_i4	233	NA	NA	+	TRINITY_DN14201_c0_g1_i4	NA	NA	NA	TC	TC	TT	TT	TT	TT
	UTRINITY_DN8095_c0_g2_i1_128	G/A	TRINITY_DN8095_c0_g2_i1	128	NA	NA	+	TRINITY_DN8095_c0_g2_i1	NA	NA	NA	GG	GG	GG	GG	AA	AA
	UTRINITY_DN19233_c0_g1_i4_158	G/A	TRINITY_DN19233_c0_g1_i4	158	NA	NA	+	TRINITY_DN19233_c0_g1_i4	NA	NA	NA	GG	GG	GG	GG	AA	AA
	UTRINITY_DN10281_c0_g1_i5_909	G/A	TRINITY_DN10281_c0_g1_i5	909	NA	NA	+	TRINITY_DN10281_c0_g1_i5	NA	NA	NA	GG	GG	GG	GG	AA	AA
	UTRINITY_DN7765_c0_g1_i6_704	C/G	TRINITY_DN7765_c0_g1_i6	704	NA	NA	+	TRINITY_DN7765_c0_g1_i6	NA	NA	NA	CC	CC	GG	GG	CC	CC
	UTRINITY_DN12984_c1_g5_i1_167	G/A	TRINITY_DN12984_c1_g5_i1	167	NA	NA	+	TRINITY_DN12984_c1_g5_i1	NA	NA	NA	GG	GG	GA	GA	GG	GG
	UTRINITY_DN9006_c0_g1_i8_175	G/A	TRINITY_DN9006_c0_g1_i8	175	NA	NA	+	TRINITY_DN9006_c0_g1_i8	NA	NA	NA	GG	GG	GG	GG	AA	AA
	UTRINITY_DN3073_c0_g1_i3_914	C/G	TRINITY_DN3073_c0_g1_i3	914	NA	NA	+	TRINITY_DN3073_c0_g1_i3	NA	NA	NA	CC	CC	CC	CC	GG	GG
	UTRINITY_DN20682_c0_g1_i2_110	G/C	TRINITY_DN20682_c0_g1_i2	110	NA	NA	+	TRINITY_DN20682_c0_g1_i2	NA	NA	NA	GG	GG	GG	GG	CC	CC
	UTRINITY_DN20682_c0_g1_i2_219	A/S	TRINITY_DN20682_c0_g1_i2	219	NA	NA	+	TRINITY_DN20682_c0_g1_i2	NA	NA	NA	AA	AA	AA	AA	GC	GC
	UTRINITY_DN38507_c0_g1_i1_366	T/C	TRINITY_DN38507_c0_g1_i1	366	NA	NA	+	TRINITY_DN38507_c0_g1_i1	NA	NA	NA	TT	TT	TT	TT	CC	CC
	UTRINITY_DN38507_c0_g1_i1_378	G/T	TRINITY_DN38507_c0_g1_i1	378	NA	NA	+	TRINITY_DN38507_c0_g1_i1	NA	NA	NA	GG	GG	GG	GG	TT	TT
	UTRINITY_DN38507_c0_g1_i1_381	T/G	TRINITY_DN38507_c0_g1_i1	381	NA	NA	+	TRINITY_DN38507_c0_g1_i1	NA	NA	NA	TT	TT	TT	TT	GG	GG
	UTRINITY_DN14154_c0_g1_i2_681	C/T	TRINITY_DN14154_c0_g1_i2	681	NA	NA	+	TRINITY_DN14154_c0_g1_i2	NA	NA	NA	CC	CC	CC	CC	TT	TT
	UTRINITY_DN14154_c0_g1_i2_683	G/A	TRINITY_DN14154_c0_g1_i2	683	NA	NA	+	TRINITY_DN14154_c0_g1_i2	NA	NA	NA	GG	GG	GG	GG	AA	AA
	UTRINITY_DN14154_c0_g1_i2_760	G/A	TRINITY_DN14154_c0_g1_i2	760	NA	NA	+	TRINITY_DN14154_c0_g1_i2	NA	NA	NA	GG	GG	AA	AA	GG	GG
	UTRINITY_DN14154_c0_g1_i2_775	T/C	TRINITY_DN14154_c0_g1_i2	775	NA	NA	+	TRINITY_DN14154_c0_g1_i2	NA	NA	NA	TT	TT	CC	CC	TT	TT
	UTRINITY_DN14154_c0_g1_i2_781	A/C	TRINITY_DN14154_c0_g1_i2	781	NA	NA	+	TRINITY_DN14154_c0_g1_i2	NA	NA	NA	AA	AA	CC	CC	AA	AA
	UTRINITY_DN14154_c0_g1_i2_811	T/C	TRINITY_DN14154_c0_g1_i2	811	NA	NA	+	TRINITY_DN14154_c0_g1_i2	NA	NA	NA	TT	TT	CC	CC	TT	TT
	UTRINITY_DN11572_c0_g1_i7_831	A/G	TRINITY_DN11572_c0_g1_i7	831	NA	NA	+	TRINITY_DN11572_c0_g1_i7	NA	NA	NA	--	--	GG	GG	AA	AA
	UTRINITY_DN11572_c0_g1_i7_879	T/C	TRINITY_DN11572_c0_g1_i7	879	NA	NA	+	TRINITY_DN11572_c0_g1_i7	NA	NA	NA	--	--	CC	CC	TT	TT
	UTRINITY_DN11572_c0_g1_i7_922	T/C	TRINITY_DN11572_c0_g1_i7	922	NA	NA	+	TRINITY_DN11572_c0_g1_i7	NA	NA	NA	--	--	TT	TT	CC	CC
	UTRINITY_DN11572_c0_g1_i7_930	T/C	TRINITY_DN11572_c0_g1_i7	930	NA	NA	+	TRINITY_DN11572_c0_g1_i7	NA	NA	NA	--	--	TT	TT	CC	CC
	UTRINITY_DN3939_c1_g2_i1_538	A/C	TRINITY_DN3939_c1_g2_i1	538	NA	NA	+	TRINITY_DN3939_c1_g2_i1	NA	NA	NA	AA	AA	AC	AC	AC	AC
	UTRINITY_DN3939_c1_g2_i1_760	C/T	TRINITY_DN3939_c1_g2_i1	760	NA	NA	+	TRINITY_DN3939_c1_g2_i1	NA	NA	NA	CC	CC	CT	CT	CT	CT
	UTRINITY_DN3939_c1_g2_i1_1207	A/G	TRINITY_DN3939_c1_g2_i1	1207	NA	NA	+	TRINITY_DN3939_c1_g2_i1	NA	NA	NA	AA	AA	AG	AG	AA	AA
	UTRINITY_DN10050_c0_g1_i1_286	A/G	TRINITY_DN10050_c0_g1_i1	286	NA	NA	+	TRINITY_DN10050_c0_g1_i1	NA	NA	NA	AA	AA	AA	AA	GG	GG
	UTRINITY_DN10050_c0_g1_i1_289	G/T	TRINITY_DN10050_c0_g1_i1	289	NA	NA	+	TRINITY_DN10050_c0_g1_i1	NA	NA	NA	GG	GG	GG	GG	TT	TT
	UTRINITY_DN13300_c2_g2_i1_853	G/A	TRINITY_DN13300_c2_g2_i1	853	NA	NA	+	TRINITY_DN13300_c2_g2_i1	NA	NA	NA	GA	GA	GG	GG	GG	GG
	UTRINITY_DN13300_c2_g2_i1_1527	A/C	TRINITY_DN13300_c2_g2_i1	1527	NA	NA	+	TRINITY_DN13300_c2_g2_i1	NA	NA	NA	AA	AA	AC	AC	AA	AA
	UTRINITY_DN3904_c0_g1_i1_874	C/T	TRINITY_DN3904_c0_g1_i1	874	NA	NA	+	TRINITY_DN3904_c0_g1_i1	NA	NA	NA	CC	CC	CC	CC	TT	TT
	UTRINITY_DN3904_c0_g1_i1_913	C/T	TRINITY_DN3904_c0_g1_i1	913	NA	NA	+	TRINITY_DN3904_c0_g1_i1	NA	NA	NA	CC	CC	TT	TT	CC	CC
	UTRINITY_DN68269_c0_g2_i7_112	T/C	TRINITY_DN68269_c0_g2_i7	112	NA	NA	+	TRINITY_DN68269_c0_g2_i7	NA	NA	NA	CC	CC	TT	TT	TT	TT
	UTRINITY_DN47992_c0_g1_i1_422	T/C	TRINITY_DN47992_c0_g1_i1	422	NA	NA	+	TRINITY_DN47992_c0_g1_i1	NA	NA	NA	TT	TT	TC	TC	TT	TT
	UTRINITY_DN47992_c0_g1_i1_425	A/G	TRINITY_DN47992_c0_g1_i1	425	NA	NA	+	TRINITY_DN47992_c0_g1_i1	NA	NA	NA	AA	AA	AG	AG	AA	AA
	UTRINITY_DN13381_c0_g1_i1_210	A/G	TRINITY_DN13381_c0_g1_i1	210	NA	NA	+	TRINITY_DN13381_c0_g1_i1	NA	NA	NA	AA	AA	AA	AA	GG	GG
	UTRINITY_DN40949_c0_g3_i3_908	G/A	TRINITY_DN40949_c0_g3_i3	908	NA	NA	+	TRINITY_DN40949_c0_g3_i3	NA	NA	NA	GG	GG	AA	AA	GG	GG
	UTRINITY_DN41160_c0_g2_i3_80	G/A	TRINITY_DN41160_c0_g2_i3	80	NA	NA	+	TRINITY_DN41160_c0_g2_i3	NA	NA	NA	GG	GG	GA	GA	GG	GG
	UTRINITY_DN8076_c0_g2_i3_828	T/C	TRINITY_DN8076_c0_g2_i3	828	NA	NA	+	TRINITY_DN8076_c0_g2_i3	NA	NA	NA	TT	TT	TC	TC	TT	TT
	UTRINITY_DN23064_c0_g1_i1_122	T/C	TRINITY_DN23064_c0_g1_i1	122	NA	NA	+	TRINITY_DN23064_c0_g1_i1	NA	NA	NA	TT	TT	TT	TT	TC	TC
	UTRINITY_DN4520_c0_g1_i10_44	C/T	TRINITY_DN4520_c0_g1_i10	44	NA	NA	+	TRINITY_DN4520_c0_g1_i10	NA	NA	NA	CC	CC	CC	CC	TT	TT
	UTRINITY_DN4520_c0_g1_i10_104	T/C	TRINITY_DN4520_c0_g1_i10	104	NA	NA	+	TRINITY_DN4520_c0_g1_i10	NA	NA	NA	TT	TT	TT	TT	CC	CC
	UTRINITY_DN4520_c0_g1_i10_162	G/A	TRINITY_DN4520_c0_g1_i10	162	NA	NA	+	TRINITY_DN4520_c0_g1_i10	NA	NA	NA	GG	GG	GG	GG	AA	AA
	UTRINITY_DN4520_c0_g1_i10_175	C/A	TRINITY_DN4520_c0_g1_i10	175	NA	NA	+	TRINITY_DN4520_c0_g1_i10	NA	NA	NA	CC	CC	CC	CC	AA	AA
	UTRINITY_DN14963_c0_g2_i11_642	C/T	TRINITY_DN14963_c0_g2_i11	642	NA	NA	+	TRINITY_DN14963_c0_g2_i11	NA	NA	NA	CC	CC	CC	CC	TT	TT
	UTRINITY_DN7911_c0_g1_i4_1109	G/A	TRINITY_DN7911_c0_g1_i4	1109	NA	NA	+	TRINITY_DN7911_c0_g1_i4	NA	NA	NA	GG	GG	GA	GA	GA	GA
	UTRINITY_DN7911_c0_g1_i4_1111	C/T	TRINITY_DN7911_c0_g1_i4	1111	NA	NA	+	TRINITY_DN7911_c0_g1_i4	NA	NA	NA	CC	CC	CC	CC	CT	CT
	UTRINITY_DN7911_c0_g1_i4_1121	C/T	TRINITY_DN7911_c0_g1_i4	1121	NA	NA	+	TRINITY_DN7911_c0_g1_i4	NA	NA	NA	CC	CC	CT	CT	CC	CC
	UTRINITY_DN4240_c0_g1_i3_384	T/C	TRINITY_DN4240_c0_g1_i3	384	NA	NA	+	TRINITY_DN4240_c0_g1_i3	NA	NA	NA	TT	TT	TT	TT	CC	CC
	UTRINITY_DN5304_c0_g1_i3_351	A/G	TRINITY_DN5304_c0_g1_i3	351	NA	NA	+	TRINITY_DN5304_c0_g1_i3	NA	NA	NA	AA	AA	GG	GG	AA	AA
	UTRINITY_DN5304_c0_g1_i3_581	A/T	TRINITY_DN5304_c0_g1_i3	581	NA	NA	+	TRINITY_DN5304_c0_g1_i3	NA	NA	NA	TT	TT	AA	AA	AA	AA
	UTRINITY_DN26489_c1_g1_i1_367	C/G	TRINITY_DN26489_c1_g1_i1	367	NA	NA	+	TRINITY_DN26489_c1_g1_i1	NA	NA	NA	CC	CC	CC	CC	GG	GG
	UTRINITY_DN26489_c1_g1_i1_420	G/A	TRINITY_DN26489_c1_g1_i1	420	NA	NA	+	TRINITY_DN26489_c1_g1_i1	NA	NA	NA	GG	GG	GG	GG	AA	AA
	UTRINITY_DN56276_c0_g2_i3_173	C/T	TRINITY_DN56276_c0_g2_i3	173	NA	NA	+	TRINITY_DN56276_c0_g2_i3	NA	NA	NA	CC	CC	CC	CC	TT	TT
	UTRINITY_DN21469_c0_g1_i2_56	C/G	TRINITY_DN21469_c0_g1_i2	56	NA	NA	+	TRINITY_DN21469_c0_g1_i2	NA	NA	NA	--	--	GG	GG	CC	CC
	UTRINITY_DN12627_c0_g3_i2_1664	A/G	TRINITY_DN12627_c0_g3_i2	1664	NA	NA	+	TRINITY_DN12627_c0_g3_i2	NA	NA	NA	GG	GG	AA	AA	AA	AA
	UTRINITY_DN3229_c0_g1_i2_133	C/T	TRINITY_DN3229_c0_g1_i2	133	NA	NA	+	TRINITY_DN3229_c0_g1_i2	NA	NA	NA	CC	CC	CT	CT	CT	CT
	UTRINITY_DN3229_c0_g1_i2_593	T/C	TRINITY_DN3229_c0_g1_i2	593	NA	NA	+	TRINITY_DN3229_c0_g1_i2	NA	NA	NA	TT	TT	TT	TT	TC	TC
	UTRINITY_DN3229_c0_g1_i2_735	C/A	TRINITY_DN3229_c0_g1_i2	735	NA	NA	+	TRINITY_DN3229_c0_g1_i2	NA	NA	NA	CC	CC	CC	CC	CA	CA
	UTRINITY_DN3229_c0_g1_i2_744	A/G	TRINITY_DN3229_c0_g1_i2	744	NA	NA	+	TRINITY_DN3229_c0_g1_i2	NA	NA	NA	AA	AA	AA	AA	AG	AG
	UTRINITY_DN61376_c0_g1_i1_100	T/C	TRINITY_DN61376_c0_g1_i1	100	NA	NA	+	TRINITY_DN61376_c0_g1_i1	NA	NA	NA	CC	CC	TT	TT	TT	TT
	UTRINITY_DN9413_c0_g2_i1_58	G/C	TRINITY_DN9413_c0_g2_i1	58	NA	NA	+	TRINITY_DN9413_c0_g2_i1	NA	NA	NA	GG	GG	GG	GG	CC	CC
	UTRINITY_DN20075_c0_g1_i1_310	G/C	TRINITY_DN20075_c0_g1_i1	310	NA	NA	+	TRINITY_DN20075_c0_g1_i1	NA	NA	NA	GG	GG	GG	GG	GC	GC
	UTRINITY_DN20075_c0_g1_i1_447	A/G	TRINITY_DN20075_c0_g1_i1	447	NA	NA	+	TRINITY_DN20075_c0_g1_i1	NA	NA	NA	AA	AA	AA	AA	AG	AG
	UTRINITY_DN20075_c0_g1_i1_665	A/G	TRINITY_DN20075_c0_g1_i1	665	NA	NA	+	TRINITY_DN20075_c0_g1_i1	NA	NA	NA	AA	AA	AA	AA	AG	AG
	UTRINITY_DN32182_c0_g1_i6_307	A/C	TRINITY_DN32182_c0_g1_i6	307	NA	NA	+	TRINITY_DN32182_c0_g1_i6	NA	NA	NA	AA	AA	CC	CC	AA	AA
	UTRINITY_DN413_c0_g1_i16_3418	C/T	TRINITY_DN413_c0_g1_i16	3418	NA	NA	+	TRINITY_DN413_c0_g1_i16	NA	NA	NA	TT	TT	CC	CC	CC	CC
	UTRINITY_DN86927_c0_g2_i1_180	A/C	TRINITY_DN86927_c0_g2_i1	180	NA	NA	+	TRINITY_DN86927_c0_g2_i1	NA	NA	NA	AA	AA	AC	AC	AA	AA
	UTRINITY_DN508_c2_g1_i1_2773	G/A	TRINITY_DN508_c2_g1_i1	2773	NA	NA	+	TRINITY_DN508_c2_g1_i1	NA	NA	NA	GG	GG	GG	GG	AA	AA
	UTRINITY_DN11468_c0_g1_i9_2347	T/A	TRINITY_DN11468_c0_g1_i9	2347	NA	NA	+	TRINITY_DN11468_c0_g1_i9	NA	NA	NA	TT	TT	AA	AA	TT	TT
	UTRINITY_DN22853_c0_g2_i2_100	G/A	TRINITY_DN22853_c0_g2_i2	100	NA	NA	+	TRINITY_DN22853_c0_g2_i2	NA	NA	NA	GG	GG	AA	AA	GG	GG
	UTRINITY_DN4329_c0_g1_i6_357	G/A	TRINITY_DN4329_c0_g1_i6	357	NA	NA	+	TRINITY_DN4329_c0_g1_i6	NA	NA	NA	GG	GG	GG	GG	AA	AA
	UTRINITY_DN1168_c1_g1_i4_400	C/T	TRINITY_DN1168_c1_g1_i4	400	NA	NA	+	TRINITY_DN1168_c1_g1_i4	NA	NA	NA	CT	CT	CT	CT	CC	CC
	UTRINITY_DN4650_c0_g1_i5_403	C/G	TRINITY_DN4650_c0_g1_i5	403	NA	NA	+	TRINITY_DN4650_c0_g1_i5	NA	NA	NA	GG	GG	CC	CC	CC	CC
	UTRINITY_DN12476_c0_g1_i7_413	C/A	TRINITY_DN12476_c0_g1_i7	413	NA	NA	+	TRINITY_DN12476_c0_g1_i7	NA	NA	NA	CC	CC	CC	CC	AA	AA
	UTRINITY_DN11960_c1_g1_i4_529	G/T	TRINITY_DN11960_c1_g1_i4	529	NA	NA	+	TRINITY_DN11960_c1_g1_i4	NA	NA	NA	GG	GG	GG	GG	TT	TT
	UTRINITY_DN81_c0_g1_i18_184	G/T	TRINITY_DN81_c0_g1_i18	184	NA	NA	+	TRINITY_DN81_c0_g1_i18	NA	NA	NA	GG	GG	GG	GG	GT	GT
	UTRINITY_DN10676_c0_g1_i6_3813	C/T	TRINITY_DN10676_c0_g1_i6	3813	NA	NA	+	TRINITY_DN10676_c0_g1_i6	NA	NA	NA	CC	CC	TT	TT	CC	CC
	UTRINITY_DN13495_c0_g1_i2_402	A/G	TRINITY_DN13495_c0_g1_i2	402	NA	NA	+	TRINITY_DN13495_c0_g1_i2	NA	NA	NA	AA	AA	AA	AA	GG	GG
	UTRINITY_DN6901_c0_g1_i7_88	T/A	TRINITY_DN6901_c0_g1_i7	88	NA	NA	+	TRINITY_DN6901_c0_g1_i7	NA	NA	NA	TT	TT	TT	TT	AA	AA
	UTRINITY_DN3212_c1_g1_i11_84	C/T	TRINITY_DN3212_c1_g1_i11	84	NA	NA	+	TRINITY_DN3212_c1_g1_i11	NA	NA	NA	CC	CC	CC	CC	CT	CT
	UTRINITY_DN3212_c1_g1_i11_136	C/T	TRINITY_DN3212_c1_g1_i11	136	NA	NA	+	TRINITY_DN3212_c1_g1_i11	NA	NA	NA	CC	CC	CC	CC	CT	CT
	UTRINITY_DN3212_c1_g1_i11_146	A/G	TRINITY_DN3212_c1_g1_i11	146	NA	NA	+	TRINITY_DN3212_c1_g1_i11	NA	NA	NA	AG	AG	AA	AA	AG	AG
	UTRINITY_DN3252_c0_g1_i8_221	G/A	TRINITY_DN3252_c0_g1_i8	221	NA	NA	+	TRINITY_DN3252_c0_g1_i8	NA	NA	NA	--	--	GG	GG	AG	AG
	UTRINITY_DN77834_c0_g5_i1_235	C/T	TRINITY_DN77834_c0_g5_i1	235	NA	NA	+	TRINITY_DN77834_c0_g5_i1	NA	NA	NA	CC	CC	CC	CC	TT	TT
	UTRINITY_DN13456_c0_g1_i5_256	T/A	TRINITY_DN13456_c0_g1_i5	256	NA	NA	+	TRINITY_DN13456_c0_g1_i5	NA	NA	NA	TT	TT	TT	TT	AA	AA
	UTRINITY_DN235481_c0_g1_i1_118	C/A	TRINITY_DN235481_c0_g1_i1	118	NA	NA	+	TRINITY_DN235481_c0_g1_i1	NA	NA	NA	CC	CC	AA	AA	CC	CC
	UTRINITY_DN10277_c0_g1_i4_581	T/C	TRINITY_DN10277_c0_g1_i4	581	NA	NA	+	TRINITY_DN10277_c0_g1_i4	NA	NA	NA	TT	TT	TT	TT	CC	CC
	UTRINITY_DN10277_c0_g1_i4_673	T/C	TRINITY_DN10277_c0_g1_i4	673	NA	NA	+	TRINITY_DN10277_c0_g1_i4	NA	NA	NA	CC	CC	TT	TT	TT	TT
	UTRINITY_DN10219_c0_g1_i3_498	C/T	TRINITY_DN10219_c0_g1_i3	498	NA	NA	+	TRINITY_DN10219_c0_g1_i3	NA	NA	NA	CC	CC	TT	TT	CC	CC
	UTRINITY_DN10219_c0_g1_i3_501	A/G	TRINITY_DN10219_c0_g1_i3	501	NA	NA	+	TRINITY_DN10219_c0_g1_i3	NA	NA	NA	AA	AA	GG	GG	AA	AA
	UTRINITY_DN667_c0_g1_i8_664	C/G	TRINITY_DN667_c0_g1_i8	664	NA	NA	+	TRINITY_DN667_c0_g1_i8	NA	NA	NA	GC	GC	GC	GC	CC	CC
	UTRINITY_DN8516_c0_g1_i13_159	C/T	TRINITY_DN8516_c0_g1_i13	159	NA	NA	+	TRINITY_DN8516_c0_g1_i13	NA	NA	NA	CT	CT	CC	CC	CT	CT
	UTRINITY_DN996_c0_g1_i5_1268	T/C	TRINITY_DN996_c0_g1_i5	1268	NA	NA	+	TRINITY_DN996_c0_g1_i5	NA	NA	NA	TT	TT	TT	TT	CC	CC
	UTRINITY_DN65039_c0_g1_i3_735	G/A	TRINITY_DN65039_c0_g1_i3	735	NA	NA	+	TRINITY_DN65039_c0_g1_i3	NA	NA	NA	GG	GG	GA	GA	GG	GG
	UTRINITY_DN8114_c0_g1_i2_257	G/A	TRINITY_DN8114_c0_g1_i2	257	NA	NA	+	TRINITY_DN8114_c0_g1_i2	NA	NA	NA	GA	GA	GA	GA	GG	GG
	UTRINITY_DN2771_c0_g1_i10_620	T/C	TRINITY_DN2771_c0_g1_i10	620	NA	NA	+	TRINITY_DN2771_c0_g1_i10	NA	NA	NA	CC	CC	TT	TT	TT	TT
	UTRINITY_DN1852_c0_g1_i1_527	C/T	TRINITY_DN1852_c0_g1_i1	527	NA	NA	+	TRINITY_DN1852_c0_g1_i1	NA	NA	NA	CC	CC	CC	CC	TT	TT
	UTRINITY_DN1852_c0_g1_i1_723	C/T	TRINITY_DN1852_c0_g1_i1	723	NA	NA	+	TRINITY_DN1852_c0_g1_i1	NA	NA	NA	CC	CC	CC	CC	TT	TT
	UTRINITY_DN6544_c0_g1_i1_442	T/C	TRINITY_DN6544_c0_g1_i1	442	NA	NA	+	TRINITY_DN6544_c0_g1_i1	NA	NA	NA	CT	CT	TT	TT	TT	TT
	UTRINITY_DN6544_c0_g1_i1_445	T/C	TRINITY_DN6544_c0_g1_i1	445	NA	NA	+	TRINITY_DN6544_c0_g1_i1	NA	NA	NA	CT	CT	TT	TT	TT	TT
	UTRINITY_DN46625_c0_g1_i3_245	A/G	TRINITY_DN46625_c0_g1_i3	245	NA	NA	+	TRINITY_DN46625_c0_g1_i3	NA	NA	NA	AA	AA	AA	AA	GG	GG
	UTRINITY_DN46625_c0_g1_i3_249	T/C	TRINITY_DN46625_c0_g1_i3	249	NA	NA	+	TRINITY_DN46625_c0_g1_i3	NA	NA	NA	TT	TT	TT	TT	CC	CC
	UTRINITY_DN27899_c0_g3_i1_156	G/A	TRINITY_DN27899_c0_g3_i1	156	NA	NA	+	TRINITY_DN27899_c0_g3_i1	NA	NA	NA	GG	GG	GG	GG	AA	AA
	UTRINITY_DN27899_c0_g3_i1_174	A/G	TRINITY_DN27899_c0_g3_i1	174	NA	NA	+	TRINITY_DN27899_c0_g3_i1	NA	NA	NA	AA	AA	AA	AA	GG	GG
	UTRINITY_DN27899_c0_g3_i1_183	T/G	TRINITY_DN27899_c0_g3_i1	183	NA	NA	+	TRINITY_DN27899_c0_g3_i1	NA	NA	NA	TT	TT	TT	TT	GG	GG
	UTRINITY_DN1009_c2_g1_i2_269	G/C	TRINITY_DN1009_c2_g1_i2	269	NA	NA	+	TRINITY_DN1009_c2_g1_i2	NA	NA	NA	GG	GG	GC	GC	GG	GG
	UTRINITY_DN1009_c2_g1_i2_650	G/T	TRINITY_DN1009_c2_g1_i2	650	NA	NA	+	TRINITY_DN1009_c2_g1_i2	NA	NA	NA	GT	GT	GG	GG	GT	GT
	UTRINITY_DN1009_c2_g1_i2_713	G/C	TRINITY_DN1009_c2_g1_i2	713	NA	NA	+	TRINITY_DN1009_c2_g1_i2	NA	NA	NA	GG	GG	GC	GC	GG	GG
	UTRINITY_DN33678_c0_g1_i1_202	A/C	TRINITY_DN33678_c0_g1_i1	202	NA	NA	+	TRINITY_DN33678_c0_g1_i1	NA	NA	NA	AA	AA	AA	AA	AC	AC
	UTRINITY_DN33678_c0_g1_i1_209	A/G	TRINITY_DN33678_c0_g1_i1	209	NA	NA	+	TRINITY_DN33678_c0_g1_i1	NA	NA	NA	AG	AG	AG	AG	AA	AA
	UTRINITY_DN1360_c0_g1_i1_1171	G/C	TRINITY_DN1360_c0_g1_i1	1171	NA	NA	+	TRINITY_DN1360_c0_g1_i1	NA	NA	NA	GG	GG	GG	GG	CC	CC
	UTRINITY_DN13841_c0_g1_i2_331	T/C	TRINITY_DN13841_c0_g1_i2	331	NA	NA	+	TRINITY_DN13841_c0_g1_i2	NA	NA	NA	TT	TT	CC	CC	TT	TT
	UTRINITY_DN5438_c0_g1_i4_163	A/G	TRINITY_DN5438_c0_g1_i4	163	NA	NA	+	TRINITY_DN5438_c0_g1_i4	NA	NA	NA	AA	AA	AA	AA	GG	GG
	UTRINITY_DN6785_c0_g1_i18_1659	G/T	TRINITY_DN6785_c0_g1_i18	1659	NA	NA	+	TRINITY_DN6785_c0_g1_i18	NA	NA	NA	GG	GG	GG	GG	TT	TT
	UTRINITY_DN508_c1_g2_i1_9	C/T	TRINITY_DN508_c1_g2_i1	9	NA	NA	+	TRINITY_DN508_c1_g2_i1	NA	NA	NA	CC	CC	CC	CC	CT	CT
	UTRINITY_DN26015_c0_g1_i8_954	T/G	TRINITY_DN26015_c0_g1_i8	954	NA	NA	+	TRINITY_DN26015_c0_g1_i8	NA	NA	NA	TT	TT	TT	TT	GG	GG
	UTRINITY_DN13166_c0_g2_i1_49	T/C	TRINITY_DN13166_c0_g2_i1	49	NA	NA	+	TRINITY_DN13166_c0_g2_i1	NA	NA	NA	CC	CC	TT	TT	TT	TT
	UTRINITY_DN35456_c0_g1_i11_225	A/G	TRINITY_DN35456_c0_g1_i11	225	NA	NA	+	TRINITY_DN35456_c0_g1_i11	NA	NA	NA	GG	GG	AA	AA	AA	AA
	UTRINITY_DN984_c0_g1_i4_1097	T/A	TRINITY_DN984_c0_g1_i4	1097	NA	NA	+	TRINITY_DN984_c0_g1_i4	NA	NA	NA	TT	TT	TT	TT	TA	TA
	UTRINITY_DN984_c0_g1_i4_1450	G/A	TRINITY_DN984_c0_g1_i4	1450	NA	NA	+	TRINITY_DN984_c0_g1_i4	NA	NA	NA	GG	GG	GG	GG	GA	GA
	UTRINITY_DN984_c0_g1_i4_1490	G/A	TRINITY_DN984_c0_g1_i4	1490	NA	NA	+	TRINITY_DN984_c0_g1_i4	NA	NA	NA	GG	GG	GG	GG	GA	GA
	UTRINITY_DN2720_c0_g1_i6_668	C/T	TRINITY_DN2720_c0_g1_i6	668	NA	NA	+	TRINITY_DN2720_c0_g1_i6	NA	NA	NA	CC	CC	CC	CC	TT	TT
	UTRINITY_DN2314_c0_g1_i9_422	C/G	TRINITY_DN2314_c0_g1_i9	422	NA	NA	+	TRINITY_DN2314_c0_g1_i9	NA	NA	NA	CC	CC	GG	GG	CC	CC
	UTRINITY_DN14050_c0_g1_i3_477	C/T	TRINITY_DN14050_c0_g1_i3	477	NA	NA	+	TRINITY_DN14050_c0_g1_i3	NA	NA	NA	CC	CC	CC	CC	TT	TT
	UTRINITY_DN8254_c0_g1_i2_2100	G/A	TRINITY_DN8254_c0_g1_i2	2100	NA	NA	+	TRINITY_DN8254_c0_g1_i2	NA	NA	NA	GG	GG	GG	GG	AA	AA
	UTRINITY_DN879_c0_g2_i1_280	T/C	TRINITY_DN879_c0_g2_i1	280	NA	NA	+	TRINITY_DN879_c0_g2_i1	NA	NA	NA	TT	TT	TT	TT	TC	TC
	UTRINITY_DN879_c0_g2_i1_323	G/C	TRINITY_DN879_c0_g2_i1	323	NA	NA	+	TRINITY_DN879_c0_g2_i1	NA	NA	NA	GG	GG	GG	GG	GC	GC
	UTRINITY_DN879_c0_g2_i1_574	C/A	TRINITY_DN879_c0_g2_i1	574	NA	NA	+	TRINITY_DN879_c0_g2_i1	NA	NA	NA	CC	CC	CC	CC	CA	CA
	UTRINITY_DN879_c0_g2_i1_637	C/T	TRINITY_DN879_c0_g2_i1	637	NA	NA	+	TRINITY_DN879_c0_g2_i1	NA	NA	NA	CT	CT	CT	CT	CC	CC
	UTRINITY_DN879_c0_g2_i1_877	A/G	TRINITY_DN879_c0_g2_i1	877	NA	NA	+	TRINITY_DN879_c0_g2_i1	NA	NA	NA	AA	AA	AG	AG	AG	AG
	UTRINITY_DN879_c0_g2_i1_1048	C/T	TRINITY_DN879_c0_g2_i1	1048	NA	NA	+	TRINITY_DN879_c0_g2_i1	NA	NA	NA	CT	CT	CT	CT	CC	CC
	UTRINITY_DN879_c0_g2_i1_1105	G/A	TRINITY_DN879_c0_g2_i1	1105	NA	NA	+	TRINITY_DN879_c0_g2_i1	NA	NA	NA	GA	GA	GA	GA	GG	GG
	UTRINITY_DN879_c0_g2_i1_1198	C/T	TRINITY_DN879_c0_g2_i1	1198	NA	NA	+	TRINITY_DN879_c0_g2_i1	NA	NA	NA	CT	CT	CT	CT	CC	CC
	UTRINITY_DN879_c0_g2_i1_1213	A/T	TRINITY_DN879_c0_g2_i1	1213	NA	NA	+	TRINITY_DN879_c0_g2_i1	NA	NA	NA	AT	AT	AT	AT	AA	AA
	UTRINITY_DN879_c0_g2_i1_1218	A/C	TRINITY_DN879_c0_g2_i1	1218	NA	NA	+	TRINITY_DN879_c0_g2_i1	NA	NA	NA	AC	AC	AC	AC	AA	AA
	UTRINITY_DN879_c0_g2_i1_1291	A/G	TRINITY_DN879_c0_g2_i1	1291	NA	NA	+	TRINITY_DN879_c0_g2_i1	NA	NA	NA	AA	AA	AA	AA	AG	AG
	UTRINITY_DN879_c0_g2_i1_1495	C/T	TRINITY_DN879_c0_g2_i1	1495	NA	NA	+	TRINITY_DN879_c0_g2_i1	NA	NA	NA	CC	CC	CC	CC	CT	CT
	UTRINITY_DN17617_c0_g1_i1_27	C/T	TRINITY_DN17617_c0_g1_i1	27	NA	NA	+	TRINITY_DN17617_c0_g1_i1	NA	NA	NA	CC	CC	CC	CC	TT	TT
	UTRINITY_DN17617_c0_g1_i1_61	C/T	TRINITY_DN17617_c0_g1_i1	61	NA	NA	+	TRINITY_DN17617_c0_g1_i1	NA	NA	NA	CC	CC	CC	CC	TT	TT
	UTRINITY_DN38156_c0_g1_i1_603	G/T	TRINITY_DN38156_c0_g1_i1	603	NA	NA	+	TRINITY_DN38156_c0_g1_i1	NA	NA	NA	GG	GG	GG	GG	GT	GT
	UTRINITY_DN3228_c0_g1_i4_1790	C/T	TRINITY_DN3228_c0_g1_i4	1790	NA	NA	+	TRINITY_DN3228_c0_g1_i4	NA	NA	NA	CC	CC	CC	CC	CT	CT
	UTRINITY_DN3228_c0_g1_i4_2009	G/A	TRINITY_DN3228_c0_g1_i4	2009	NA	NA	+	TRINITY_DN3228_c0_g1_i4	NA	NA	NA	GG	GG	GA	GA	GG	GG
	UTRINITY_DN3228_c0_g1_i4_2036	C/T	TRINITY_DN3228_c0_g1_i4	2036	NA	NA	+	TRINITY_DN3228_c0_g1_i4	NA	NA	NA	CC	CC	CC	CC	TT	TT
	UTRINITY_DN14113_c0_g1_i4_1598	T/C	TRINITY_DN14113_c0_g1_i4	1598	NA	NA	+	TRINITY_DN14113_c0_g1_i4	NA	NA	NA	TT	TT	TT	TT	CC	CC
	UTRINITY_DN40401_c0_g1_i5_394	G/T	TRINITY_DN40401_c0_g1_i5	394	NA	NA	+	TRINITY_DN40401_c0_g1_i5	NA	NA	NA	GG	GG	GG	GG	TT	TT
	UTRINITY_DN16512_c0_g1_i2_1465	C/G	TRINITY_DN16512_c0_g1_i2	1465	NA	NA	+	TRINITY_DN16512_c0_g1_i2	NA	NA	NA	CC	CC	CG	CG	CC	CC
	UTRINITY_DN48838_c1_g1_i1_258	C/G	TRINITY_DN48838_c1_g1_i1	258	NA	NA	+	TRINITY_DN48838_c1_g1_i1	NA	NA	NA	CG	CG	CG	CG	CC	CC
	UTRINITY_DN3063_c2_g2_i1_156	C/G	TRINITY_DN3063_c2_g2_i1	156	NA	NA	+	TRINITY_DN3063_c2_g2_i1	NA	NA	NA	--	--	CC	CC	CG	CG
	UTRINITY_DN33187_c0_g1_i4_226	A/C	TRINITY_DN33187_c0_g1_i4	226	NA	NA	+	TRINITY_DN33187_c0_g1_i4	NA	NA	NA	AA	AA	AC	AC	AA	AA
	UTRINITY_DN33187_c0_g1_i4_254	A/G	TRINITY_DN33187_c0_g1_i4	254	NA	NA	+	TRINITY_DN33187_c0_g1_i4	NA	NA	NA	AA	AA	AA	AA	GG	GG
	UTRINITY_DN6891_c0_g1_i7_1883	C/G	TRINITY_DN6891_c0_g1_i7	1883	NA	NA	+	TRINITY_DN6891_c0_g1_i7	NA	NA	NA	CC	CC	CC	CC	GG	GG
	UTRINITY_DN4083_c0_g1_i5_458	C/T	TRINITY_DN4083_c0_g1_i5	458	NA	NA	+	TRINITY_DN4083_c0_g1_i5	NA	NA	NA	TT	TT	CC	CC	CC	CC
	UTRINITY_DN4083_c0_g1_i5_1907	C/T	TRINITY_DN4083_c0_g1_i5	1907	NA	NA	+	TRINITY_DN4083_c0_g1_i5	NA	NA	NA	CC	CC	TT	TT	CC	CC
	UTRINITY_DN393_c0_g1_i5_532	T/A	TRINITY_DN393_c0_g1_i5	532	NA	NA	+	TRINITY_DN393_c0_g1_i5	NA	NA	NA	TT	TT	TA	TA	TT	TT
	UTRINITY_DN393_c0_g1_i5_563	C/G	TRINITY_DN393_c0_g1_i5	563	NA	NA	+	TRINITY_DN393_c0_g1_i5	NA	NA	NA	CC	CC	CG	CG	CC	CC
	UTRINITY_DN393_c0_g1_i5_579	T/A	TRINITY_DN393_c0_g1_i5	579	NA	NA	+	TRINITY_DN393_c0_g1_i5	NA	NA	NA	TT	TT	TA	TA	TT	TT
	UTRINITY_DN393_c0_g1_i5_587	T/A	TRINITY_DN393_c0_g1_i5	587	NA	NA	+	TRINITY_DN393_c0_g1_i5	NA	NA	NA	TT	TT	TA	TA	TT	TT
	UTRINITY_DN393_c0_g1_i5_644	A/T	TRINITY_DN393_c0_g1_i5	644	NA	NA	+	TRINITY_DN393_c0_g1_i5	NA	NA	NA	AA	AA	AT	AT	AA	AA
	UTRINITY_DN12846_c0_g1_i1_865	C/T	TRINITY_DN12846_c0_g1_i1	865	NA	NA	+	TRINITY_DN12846_c0_g1_i1	NA	NA	NA	CC	CC	CC	CC	TT	TT
	UTRINITY_DN12846_c0_g1_i1_966	C/T	TRINITY_DN12846_c0_g1_i1	966	NA	NA	+	TRINITY_DN12846_c0_g1_i1	NA	NA	NA	CT	CT	CT	CT	CC	CC
	UTRINITY_DN7155_c0_g1_i5_140	T/C	TRINITY_DN7155_c0_g1_i5	140	NA	NA	+	TRINITY_DN7155_c0_g1_i5	NA	NA	NA	TT	TT	TT	TT	CC	CC
	UTRINITY_DN57770_c0_g1_i3_1237	T/A	TRINITY_DN57770_c0_g1_i3	1237	NA	NA	+	TRINITY_DN57770_c0_g1_i3	NA	NA	NA	TT	TT	TT	TT	AA	AA
	UTRINITY_DN57770_c0_g1_i3_1260	G/A	TRINITY_DN57770_c0_g1_i3	1260	NA	NA	+	TRINITY_DN57770_c0_g1_i3	NA	NA	NA	GG	GG	AA	AA	GG	GG
	UTRINITY_DN765_c0_g2_i1_292	A/G	TRINITY_DN765_c0_g2_i1	292	NA	NA	+	TRINITY_DN765_c0_g2_i1	NA	NA	NA	AA	AA	AG	AG	AA	AA
	UTRINITY_DN765_c0_g2_i1_314	G/C	TRINITY_DN765_c0_g2_i1	314	NA	NA	+	TRINITY_DN765_c0_g2_i1	NA	NA	NA	GG	GG	GC	GC	GG	GG
	UTRINITY_DN765_c0_g2_i1_321	T/G	TRINITY_DN765_c0_g2_i1	321	NA	NA	+	TRINITY_DN765_c0_g2_i1	NA	NA	NA	TT	TT	TG	TG	TT	TT
	UTRINITY_DN765_c0_g2_i1_322	T/A	TRINITY_DN765_c0_g2_i1	322	NA	NA	+	TRINITY_DN765_c0_g2_i1	NA	NA	NA	TT	TT	TA	TA	TT	TT
	UTRINITY_DN765_c0_g2_i1_389	A/G	TRINITY_DN765_c0_g2_i1	389	NA	NA	+	TRINITY_DN765_c0_g2_i1	NA	NA	NA	AA	AA	AG	AG	AA	AA
	UTRINITY_DN765_c0_g2_i1_394	C/T	TRINITY_DN765_c0_g2_i1	394	NA	NA	+	TRINITY_DN765_c0_g2_i1	NA	NA	NA	CC	CC	CT	CT	CC	CC
	UTRINITY_DN13892_c0_g1_i3_318	G/T	TRINITY_DN13892_c0_g1_i3	318	NA	NA	+	TRINITY_DN13892_c0_g1_i3	NA	NA	NA	GG	GG	GT	GT	GG	GG
	UTRINITY_DN5355_c0_g1_i3_1046	A/G	TRINITY_DN5355_c0_g1_i3	1046	NA	NA	+	TRINITY_DN5355_c0_g1_i3	NA	NA	NA	AA	AA	AA	AA	GG	GG
	UTRINITY_DN91560_c0_g1_i5_3695	G/C	TRINITY_DN91560_c0_g1_i5	3695	NA	NA	+	TRINITY_DN91560_c0_g1_i5	NA	NA	NA	GG	GG	GG	GG	GC	GC
	UTRINITY_DN10985_c0_g2_i1_95	C/A	TRINITY_DN10985_c0_g2_i1	95	NA	NA	+	TRINITY_DN10985_c0_g2_i1	NA	NA	NA	CC	CC	CC	CC	CA	CA
	UTRINITY_DN10985_c0_g2_i1_132	C/T	TRINITY_DN10985_c0_g2_i1	132	NA	NA	+	TRINITY_DN10985_c0_g2_i1	NA	NA	NA	CC	CC	CC	CC	CT	CT
	UTRINITY_DN10985_c0_g2_i1_511	T/A	TRINITY_DN10985_c0_g2_i1	511	NA	NA	+	TRINITY_DN10985_c0_g2_i1	NA	NA	NA	TT	TT	TA	TA	TA	TA
	UTRINITY_DN10985_c0_g2_i1_514	T/A	TRINITY_DN10985_c0_g2_i1	514	NA	NA	+	TRINITY_DN10985_c0_g2_i1	NA	NA	NA	TT	TT	TA	TA	TA	TA
	UTRINITY_DN10985_c0_g2_i1_741	T/A	TRINITY_DN10985_c0_g2_i1	741	NA	NA	+	TRINITY_DN10985_c0_g2_i1	NA	NA	NA	TT	TT	TA	TA	TA	TA
	UTRINITY_DN10985_c0_g2_i1_750	C/T	TRINITY_DN10985_c0_g2_i1	750	NA	NA	+	TRINITY_DN10985_c0_g2_i1	NA	NA	NA	CC	CC	CT	CT	CT	CT
	UTRINITY_DN10985_c0_g2_i1_756	A/G	TRINITY_DN10985_c0_g2_i1	756	NA	NA	+	TRINITY_DN10985_c0_g2_i1	NA	NA	NA	AA	AA	AG	AG	AG	AG
	UTRINITY_DN40241_c2_g1_i1_2406	A/G	TRINITY_DN40241_c2_g1_i1	2406	NA	NA	+	TRINITY_DN40241_c2_g1_i1	NA	NA	NA	AA	AA	AA	AA	AG	AG
	UTRINITY_DN40241_c2_g1_i1_2407	C/T	TRINITY_DN40241_c2_g1_i1	2407	NA	NA	+	TRINITY_DN40241_c2_g1_i1	NA	NA	NA	CC	CC	CC	CC	CT	CT
	UTRINITY_DN40241_c2_g1_i1_2553	A/G	TRINITY_DN40241_c2_g1_i1	2553	NA	NA	+	TRINITY_DN40241_c2_g1_i1	NA	NA	NA	AA	AA	AA	AA	AG	AG
	UTRINITY_DN39716_c0_g1_i1_214	T/G	TRINITY_DN39716_c0_g1_i1	214	NA	NA	+	TRINITY_DN39716_c0_g1_i1	NA	NA	NA	TT	TT	TT	TT	GG	GG
	UTRINITY_DN39716_c0_g1_i1_227	G/A	TRINITY_DN39716_c0_g1_i1	227	NA	NA	+	TRINITY_DN39716_c0_g1_i1	NA	NA	NA	GG	GG	GG	GG	AA	AA
	UTRINITY_DN13278_c0_g1_i8_205	G/A	TRINITY_DN13278_c0_g1_i8	205	NA	NA	+	TRINITY_DN13278_c0_g1_i8	NA	NA	NA	GG	GG	GG	GG	AA	AA
	UTRINITY_DN13278_c0_g1_i8_229	A/G	TRINITY_DN13278_c0_g1_i8	229	NA	NA	+	TRINITY_DN13278_c0_g1_i8	NA	NA	NA	AA	AA	AA	AA	GG	GG
	UTRINITY_DN13278_c0_g1_i8_231	T/C	TRINITY_DN13278_c0_g1_i8	231	NA	NA	+	TRINITY_DN13278_c0_g1_i8	NA	NA	NA	TT	TT	TT	TT	CC	CC
	UTRINITY_DN13278_c0_g1_i8_232	C/T	TRINITY_DN13278_c0_g1_i8	232	NA	NA	+	TRINITY_DN13278_c0_g1_i8	NA	NA	NA	CC	CC	CC	CC	TT	TT
	UTRINITY_DN13278_c0_g1_i8_409	T/C	TRINITY_DN13278_c0_g1_i8	409	NA	NA	+	TRINITY_DN13278_c0_g1_i8	NA	NA	NA	TT	TT	TT	TT	CC	CC
	UTRINITY_DN13278_c0_g1_i8_416	G/A	TRINITY_DN13278_c0_g1_i8	416	NA	NA	+	TRINITY_DN13278_c0_g1_i8	NA	NA	NA	GG	GG	GG	GG	AA	AA
	UTRINITY_DN13278_c0_g1_i8_428	T/C	TRINITY_DN13278_c0_g1_i8	428	NA	NA	+	TRINITY_DN13278_c0_g1_i8	NA	NA	NA	TT	TT	TT	TT	CC	CC
	UTRINITY_DN13278_c0_g1_i8_444	T/C	TRINITY_DN13278_c0_g1_i8	444	NA	NA	+	TRINITY_DN13278_c0_g1_i8	NA	NA	NA	TT	TT	TT	TT	CC	CC
	UTRINITY_DN24257_c0_g1_i3_931	T/C	TRINITY_DN24257_c0_g1_i3	931	NA	NA	+	TRINITY_DN24257_c0_g1_i3	NA	NA	NA	TT	TT	CC	CC	TT	TT
	UTRINITY_DN24257_c0_g1_i3_1037	A/G	TRINITY_DN24257_c0_g1_i3	1037	NA	NA	+	TRINITY_DN24257_c0_g1_i3	NA	NA	NA	AA	AA	AA	AA	GG	GG
	UTRINITY_DN24257_c0_g1_i3_1096	A/G	TRINITY_DN24257_c0_g1_i3	1096	NA	NA	+	TRINITY_DN24257_c0_g1_i3	NA	NA	NA	AA	AA	AA	AA	GG	GG
	UTRINITY_DN6299_c0_g1_i5_508	G/A	TRINITY_DN6299_c0_g1_i5	508	NA	NA	+	TRINITY_DN6299_c0_g1_i5	NA	NA	NA	AA	AA	GG	GG	GG	GG
	UTRINITY_DN6491_c0_g2_i1_319	C/T	TRINITY_DN6491_c0_g2_i1	319	NA	NA	+	TRINITY_DN6491_c0_g2_i1	NA	NA	NA	CC	CC	CT	CT	CT	CT
	UTRINITY_DN6491_c0_g2_i1_1118	T/C	TRINITY_DN6491_c0_g2_i1	1118	NA	NA	+	TRINITY_DN6491_c0_g2_i1	NA	NA	NA	TT	TT	TC	TC	TC	TC
	UTRINITY_DN6491_c0_g2_i1_1323	G/C	TRINITY_DN6491_c0_g2_i1	1323	NA	NA	+	TRINITY_DN6491_c0_g2_i1	NA	NA	NA	GG	GG	GC	GC	GC	GC
	UTRINITY_DN2526_c0_g1_i4_3091	T/A	TRINITY_DN2526_c0_g1_i4	3091	NA	NA	+	TRINITY_DN2526_c0_g1_i4	NA	NA	NA	TT	TT	AT	AT	TT	TT
	UTRINITY_DN16131_c0_g1_i6_348	C/G	TRINITY_DN16131_c0_g1_i6	348	NA	NA	+	TRINITY_DN16131_c0_g1_i6	NA	NA	NA	CC	CC	CC	CC	GG	GG
	UTRINITY_DN52414_c0_g2_i2_641	C/G	TRINITY_DN52414_c0_g2_i2	641	NA	NA	+	TRINITY_DN52414_c0_g2_i2	NA	NA	NA	CC	CC	CC	CC	GG	GG
	UTRINITY_DN3858_c0_g1_i5_286	C/T	TRINITY_DN3858_c0_g1_i5	286	NA	NA	+	TRINITY_DN3858_c0_g1_i5	NA	NA	NA	TT	TT	CC	CC	CC	CC
	UTRINITY_DN5841_c0_g2_i1_526	T/C	TRINITY_DN5841_c0_g2_i1	526	NA	NA	+	TRINITY_DN5841_c0_g2_i1	NA	NA	NA	TT	TT	--	--	CC	CC
	UTRINITY_DN5841_c0_g2_i1_1007	A/G	TRINITY_DN5841_c0_g2_i1	1007	NA	NA	+	TRINITY_DN5841_c0_g2_i1	NA	NA	NA	AA	AA	--	--	GG	GG
	UTRINITY_DN5841_c0_g2_i1_1025	A/G	TRINITY_DN5841_c0_g2_i1	1025	NA	NA	+	TRINITY_DN5841_c0_g2_i1	NA	NA	NA	GG	GG	--	--	AA	AA
	UTRINITY_DN29143_c0_g2_i1_222	A/T	TRINITY_DN29143_c0_g2_i1	222	NA	NA	+	TRINITY_DN29143_c0_g2_i1	NA	NA	NA	--	--	AA	AA	TT	TT
	UTRINITY_DN29143_c0_g2_i1_271	A/G	TRINITY_DN29143_c0_g2_i1	271	NA	NA	+	TRINITY_DN29143_c0_g2_i1	NA	NA	NA	--	--	AA	AA	GG	GG
	UTRINITY_DN3983_c0_g1_i3_2263	G/A	TRINITY_DN3983_c0_g1_i3	2263	NA	NA	+	TRINITY_DN3983_c0_g1_i3	NA	NA	NA	GG	GG	GG	GG	AA	AA
	UTRINITY_DN3983_c0_g1_i3_2316	G/T	TRINITY_DN3983_c0_g1_i3	2316	NA	NA	+	TRINITY_DN3983_c0_g1_i3	NA	NA	NA	GG	GG	GG	GG	TT	TT
	UTRINITY_DN3983_c0_g1_i3_2344	T/C	TRINITY_DN3983_c0_g1_i3	2344	NA	NA	+	TRINITY_DN3983_c0_g1_i3	NA	NA	NA	TT	TT	TT	TT	CC	CC
	UTRINITY_DN3983_c0_g1_i3_2369	A/G	TRINITY_DN3983_c0_g1_i3	2369	NA	NA	+	TRINITY_DN3983_c0_g1_i3	NA	NA	NA	AA	AA	AA	AA	GG	GG
	UTRINITY_DN3983_c0_g1_i3_2413	G/T	TRINITY_DN3983_c0_g1_i3	2413	NA	NA	+	TRINITY_DN3983_c0_g1_i3	NA	NA	NA	GG	GG	GG	GG	TT	TT
	UTRINITY_DN3983_c0_g1_i3_2417	T/C	TRINITY_DN3983_c0_g1_i3	2417	NA	NA	+	TRINITY_DN3983_c0_g1_i3	NA	NA	NA	TT	TT	TT	TT	CC	CC
	UTRINITY_DN3983_c0_g1_i3_2423	G/A	TRINITY_DN3983_c0_g1_i3	2423	NA	NA	+	TRINITY_DN3983_c0_g1_i3	NA	NA	NA	GG	GG	GG	GG	AA	AA
	UTRINITY_DN3983_c0_g1_i3_2433	T/C	TRINITY_DN3983_c0_g1_i3	2433	NA	NA	+	TRINITY_DN3983_c0_g1_i3	NA	NA	NA	TT	TT	TT	TT	CC	CC
	UTRINITY_DN3983_c0_g1_i3_2442	G/T	TRINITY_DN3983_c0_g1_i3	2442	NA	NA	+	TRINITY_DN3983_c0_g1_i3	NA	NA	NA	GG	GG	GG	GG	TT	TT
	UTRINITY_DN3983_c0_g1_i3_2448	T/A	TRINITY_DN3983_c0_g1_i3	2448	NA	NA	+	TRINITY_DN3983_c0_g1_i3	NA	NA	NA	TT	TT	TT	TT	AA	AA
	UTRINITY_DN30681_c0_g1_i2_104	T/C	TRINITY_DN30681_c0_g1_i2	104	NA	NA	+	TRINITY_DN30681_c0_g1_i2	NA	NA	NA	TT	TT	TT	TT	TC	TC
	UTRINITY_DN167883_c0_g1_i1_34	C/T	TRINITY_DN167883_c0_g1_i1	34	NA	NA	+	TRINITY_DN167883_c0_g1_i1	NA	NA	NA	CT	CT	CC	CC	CC	CC
	UTRINITY_DN2967_c0_g1_i15_832	G/A	TRINITY_DN2967_c0_g1_i15	832	NA	NA	+	TRINITY_DN2967_c0_g1_i15	NA	NA	NA	GG	GG	GA	GA	GA	GA
	UTRINITY_DN2967_c0_g1_i15_1004	T/C	TRINITY_DN2967_c0_g1_i15	1004	NA	NA	+	TRINITY_DN2967_c0_g1_i15	NA	NA	NA	TT	TT	TC	TC	TC	TC
	UTRINITY_DN9319_c0_g1_i1_1518	A/C	TRINITY_DN9319_c0_g1_i1	1518	NA	NA	+	TRINITY_DN9319_c0_g1_i1	NA	NA	NA	CC	CC	AA	AA	AA	AA
	UTRINITY_DN9429_c0_g1_i5_397	T/C	TRINITY_DN9429_c0_g1_i5	397	NA	NA	+	TRINITY_DN9429_c0_g1_i5	NA	NA	NA	TT	TT	CC	CC	TT	TT
	UTRINITY_DN13656_c0_g2_i1_162	G/A	TRINITY_DN13656_c0_g2_i1	162	NA	NA	+	TRINITY_DN13656_c0_g2_i1	NA	NA	NA	AG	AG	AG	AG	GG	GG
	UTRINITY_DN13656_c0_g2_i1_189	T/C	TRINITY_DN13656_c0_g2_i1	189	NA	NA	+	TRINITY_DN13656_c0_g2_i1	NA	NA	NA	CT	CT	CT	CT	TT	TT
	UTRINITY_DN13656_c0_g2_i1_249	C/T	TRINITY_DN13656_c0_g2_i1	249	NA	NA	+	TRINITY_DN13656_c0_g2_i1	NA	NA	NA	TC	TC	TC	TC	CC	CC
	UTRINITY_DN13656_c0_g2_i1_282	A/G	TRINITY_DN13656_c0_g2_i1	282	NA	NA	+	TRINITY_DN13656_c0_g2_i1	NA	NA	NA	AA	AA	AG	AG	GG	GG
	UTRINITY_DN37975_c1_g2_i1_1119	G/A	TRINITY_DN37975_c1_g2_i1	1119	NA	NA	+	TRINITY_DN37975_c1_g2_i1	NA	NA	NA	AA	AA	GG	GG	GG	GG
	UTRINITY_DN7378_c0_g1_i4_544	T/C	TRINITY_DN7378_c0_g1_i4	544	NA	NA	+	TRINITY_DN7378_c0_g1_i4	NA	NA	NA	CC	CC	TT	TT	TT	TT
	UTRINITY_DN41726_c0_g2_i1_128	G/A	TRINITY_DN41726_c0_g2_i1	128	NA	NA	+	TRINITY_DN41726_c0_g2_i1	NA	NA	NA	GG	GG	GG	GG	GA	GA
	UTRINITY_DN41726_c0_g2_i1_182	A/G	TRINITY_DN41726_c0_g2_i1	182	NA	NA	+	TRINITY_DN41726_c0_g2_i1	NA	NA	NA	AA	AA	AG	AG	AG	AG
	UTRINITY_DN5573_c0_g1_i3_1483	A/C	TRINITY_DN5573_c0_g1_i3	1483	NA	NA	+	TRINITY_DN5573_c0_g1_i3	NA	NA	NA	AA	AA	CC	CC	AA	AA
	UTRINITY_DN11054_c0_g2_i3_262	C/T	TRINITY_DN11054_c0_g2_i3	262	NA	NA	+	TRINITY_DN11054_c0_g2_i3	NA	NA	NA	CC	CC	CC	CC	CT	CT
	UTRINITY_DN11054_c0_g2_i3_373	C/T	TRINITY_DN11054_c0_g2_i3	373	NA	NA	+	TRINITY_DN11054_c0_g2_i3	NA	NA	NA	CC	CC	CC	CC	CT	CT
	UTRINITY_DN62179_c0_g1_i1_525	C/G	TRINITY_DN62179_c0_g1_i1	525	NA	NA	+	TRINITY_DN62179_c0_g1_i1	NA	NA	NA	CC	CC	CC	CC	CG	CG
	UTRINITY_DN3105_c0_g1_i7_224	G/C	TRINITY_DN3105_c0_g1_i7	224	NA	NA	+	TRINITY_DN3105_c0_g1_i7	NA	NA	NA	CG	CG	CG	CG	GG	GG
	UTRINITY_DN5212_c0_g1_i17_2469	C/G	TRINITY_DN5212_c0_g1_i17	2469	NA	NA	+	TRINITY_DN5212_c0_g1_i17	NA	NA	NA	CC	CC	CC	CC	GG	GG
	UTRINITY_DN8722_c0_g2_i10_91	A/G	TRINITY_DN8722_c0_g2_i10	91	NA	NA	+	TRINITY_DN8722_c0_g2_i10	NA	NA	NA	AA	AA	AA	AA	AG	AG
	UTRINITY_DN8722_c0_g2_i10_130	T/C	TRINITY_DN8722_c0_g2_i10	130	NA	NA	+	TRINITY_DN8722_c0_g2_i10	NA	NA	NA	TT	TT	TT	TT	TC	TC
	UTRINITY_DN8722_c0_g2_i10_163	G/A	TRINITY_DN8722_c0_g2_i10	163	NA	NA	+	TRINITY_DN8722_c0_g2_i10	NA	NA	NA	GG	GG	GG	GG	GA	GA
	UTRINITY_DN8722_c0_g2_i10_199	T/C	TRINITY_DN8722_c0_g2_i10	199	NA	NA	+	TRINITY_DN8722_c0_g2_i10	NA	NA	NA	TT	TT	TT	TT	TC	TC
	UTRINITY_DN8722_c0_g2_i10_328	T/G	TRINITY_DN8722_c0_g2_i10	328	NA	NA	+	TRINITY_DN8722_c0_g2_i10	NA	NA	NA	TT	TT	TT	TT	TG	TG
	UTRINITY_DN11230_c0_g1_i2_2264	C/G	TRINITY_DN11230_c0_g1_i2	2264	NA	NA	+	TRINITY_DN11230_c0_g1_i2	NA	NA	NA	CC	CC	CC	CC	CG	CG
	UTRINITY_DN34696_c0_g1_i2_254	G/C	TRINITY_DN34696_c0_g1_i2	254	NA	NA	+	TRINITY_DN34696_c0_g1_i2	NA	NA	NA	CC	CC	GG	GG	GG	GG
	UTRINITY_DN12351_c0_g1_i7_104	T/G	TRINITY_DN12351_c0_g1_i7	104	NA	NA	+	TRINITY_DN12351_c0_g1_i7	NA	NA	NA	TT	TT	TT	TT	GG	GG
	UTRINITY_DN12351_c0_g1_i7_309	A/G	TRINITY_DN12351_c0_g1_i7	309	NA	NA	+	TRINITY_DN12351_c0_g1_i7	NA	NA	NA	AA	AA	GG	GG	AA	AA
	UTRINITY_DN12351_c0_g1_i7_428	G/C	TRINITY_DN12351_c0_g1_i7	428	NA	NA	+	TRINITY_DN12351_c0_g1_i7	NA	NA	NA	GG	GG	GG	GG	CC	CC
	UTRINITY_DN12351_c0_g1_i7_436	C/T	TRINITY_DN12351_c0_g1_i7	436	NA	NA	+	TRINITY_DN12351_c0_g1_i7	NA	NA	NA	CC	CC	CC	CC	TT	TT
	UTRINITY_DN12351_c0_g1_i7_560	T/G	TRINITY_DN12351_c0_g1_i7	560	NA	NA	+	TRINITY_DN12351_c0_g1_i7	NA	NA	NA	TT	TT	TT	TT	GG	GG
	UTRINITY_DN4012_c1_g1_i8_80	G/A	TRINITY_DN4012_c1_g1_i8	80	NA	NA	+	TRINITY_DN4012_c1_g1_i8	NA	NA	NA	GA	GA	GG	GG	GG	GG
	UTRINITY_DN4012_c1_g1_i8_83	G/C	TRINITY_DN4012_c1_g1_i8	83	NA	NA	+	TRINITY_DN4012_c1_g1_i8	NA	NA	NA	GC	GC	GG	GG	GC	GC
	UTRINITY_DN1602_c0_g1_i2_866	T/C	TRINITY_DN1602_c0_g1_i2	866	NA	NA	+	TRINITY_DN1602_c0_g1_i2	NA	NA	NA	TT	TT	TT	TT	TC	TC
	UTRINITY_DN1602_c0_g1_i2_1373	C/T	TRINITY_DN1602_c0_g1_i2	1373	NA	NA	+	TRINITY_DN1602_c0_g1_i2	NA	NA	NA	CC	CC	CC	CC	CT	CT
	UTRINITY_DN1602_c0_g1_i2_1745	G/A	TRINITY_DN1602_c0_g1_i2	1745	NA	NA	+	TRINITY_DN1602_c0_g1_i2	NA	NA	NA	GG	GG	GG	GG	GA	GA
	UTRINITY_DN1602_c0_g1_i2_1907	C/G	TRINITY_DN1602_c0_g1_i2	1907	NA	NA	+	TRINITY_DN1602_c0_g1_i2	NA	NA	NA	CG	CG	CG	CG	CC	CC
	UTRINITY_DN26649_c0_g1_i3_199	A/G	TRINITY_DN26649_c0_g1_i3	199	NA	NA	+	TRINITY_DN26649_c0_g1_i3	NA	NA	NA	AA	AA	AA	AA	GG	GG
	UTRINITY_DN3595_c0_g1_i3_2238	A/G	TRINITY_DN3595_c0_g1_i3	2238	NA	NA	+	TRINITY_DN3595_c0_g1_i3	NA	NA	NA	AG	AG	AG	AG	AA	AA
	UTRINITY_DN3595_c0_g1_i3_2241	G/A	TRINITY_DN3595_c0_g1_i3	2241	NA	NA	+	TRINITY_DN3595_c0_g1_i3	NA	NA	NA	GA	GA	GA	GA	GG	GG
	UTRINITY_DN1275_c0_g1_i6_2338	T/C	TRINITY_DN1275_c0_g1_i6	2338	NA	NA	+	TRINITY_DN1275_c0_g1_i6	NA	NA	NA	TT	TT	CC	CC	TT	TT
	UTRINITY_DN1275_c0_g1_i6_2520	C/A	TRINITY_DN1275_c0_g1_i6	2520	NA	NA	+	TRINITY_DN1275_c0_g1_i6	NA	NA	NA	CC	CC	CC	CC	AC	AC
	UTRINITY_DN1275_c0_g1_i6_2525	C/T	TRINITY_DN1275_c0_g1_i6	2525	NA	NA	+	TRINITY_DN1275_c0_g1_i6	NA	NA	NA	CC	CC	CC	CC	TC	TC
	UTRINITY_DN1275_c0_g1_i6_2570	T/C	TRINITY_DN1275_c0_g1_i6	2570	NA	NA	+	TRINITY_DN1275_c0_g1_i6	NA	NA	NA	TT	TT	TT	TT	TC	TC
	UTRINITY_DN1275_c0_g1_i6_2574	C/G	TRINITY_DN1275_c0_g1_i6	2574	NA	NA	+	TRINITY_DN1275_c0_g1_i6	NA	NA	NA	CC	CC	CC	CC	CG	CG
	UTRINITY_DN1275_c0_g1_i6_2577	C/T	TRINITY_DN1275_c0_g1_i6	2577	NA	NA	+	TRINITY_DN1275_c0_g1_i6	NA	NA	NA	CC	CC	CC	CC	CT	CT
	UTRINITY_DN1275_c0_g1_i6_2581	G/T	TRINITY_DN1275_c0_g1_i6	2581	NA	NA	+	TRINITY_DN1275_c0_g1_i6	NA	NA	NA	GG	GG	GG	GG	GT	GT
	UTRINITY_DN1275_c0_g1_i6_2583	C/T	TRINITY_DN1275_c0_g1_i6	2583	NA	NA	+	TRINITY_DN1275_c0_g1_i6	NA	NA	NA	CC	CC	CC	CC	CT	CT
	UTRINITY_DN1275_c0_g1_i6_2606	T/C	TRINITY_DN1275_c0_g1_i6	2606	NA	NA	+	TRINITY_DN1275_c0_g1_i6	NA	NA	NA	TT	TT	TT	TT	TC	TC
	UTRINITY_DN65203_c0_g1_i1_216	A/C	TRINITY_DN65203_c0_g1_i1	216	NA	NA	+	TRINITY_DN65203_c0_g1_i1	NA	NA	NA	AA	AA	AC	AC	AA	AA
	UTRINITY_DN15980_c0_g1_i5_1594	T/G	TRINITY_DN15980_c0_g1_i5	1594	NA	NA	+	TRINITY_DN15980_c0_g1_i5	NA	NA	NA	TT	TT	TT	TT	GG	GG
	UTRINITY_DN5428_c0_g2_i2_589	T/C	TRINITY_DN5428_c0_g2_i2	589	NA	NA	+	TRINITY_DN5428_c0_g2_i2	NA	NA	NA	TC	TC	TC	TC	TT	TT
	UTRINITY_DN39328_c0_g1_i1_74	A/T	TRINITY_DN39328_c0_g1_i1	74	NA	NA	+	TRINITY_DN39328_c0_g1_i1	NA	NA	NA	AA	AA	AT	AT	AT	AT
	UTRINITY_DN1114_c0_g1_i6_162	G/C	TRINITY_DN1114_c0_g1_i6	162	NA	NA	+	TRINITY_DN1114_c0_g1_i6	NA	NA	NA	GG	GG	GG	GG	CC	CC
	UTRINITY_DN1114_c0_g1_i6_165	C/T	TRINITY_DN1114_c0_g1_i6	165	NA	NA	+	TRINITY_DN1114_c0_g1_i6	NA	NA	NA	CC	CC	CC	CC	TT	TT
	UTRINITY_DN1114_c0_g1_i6_177	T/C	TRINITY_DN1114_c0_g1_i6	177	NA	NA	+	TRINITY_DN1114_c0_g1_i6	NA	NA	NA	TT	TT	TT	TT	CC	CC
	UTRINITY_DN1114_c0_g1_i6_198	T/G	TRINITY_DN1114_c0_g1_i6	198	NA	NA	+	TRINITY_DN1114_c0_g1_i6	NA	NA	NA	TT	TT	TT	TT	GG	GG
	UTRINITY_DN1114_c0_g1_i6_264	C/T	TRINITY_DN1114_c0_g1_i6	264	NA	NA	+	TRINITY_DN1114_c0_g1_i6	NA	NA	NA	CT	CT	CC	CC	CC	CC
	UTRINITY_DN1114_c0_g1_i6_267	C/G	TRINITY_DN1114_c0_g1_i6	267	NA	NA	+	TRINITY_DN1114_c0_g1_i6	NA	NA	NA	CG	CG	CC	CC	CC	CC
	UTRINITY_DN1114_c0_g1_i6_279	G/C	TRINITY_DN1114_c0_g1_i6	279	NA	NA	+	TRINITY_DN1114_c0_g1_i6	NA	NA	NA	GC	GC	GG	GG	GG	GG
	UTRINITY_DN1114_c0_g1_i6_393	A/G	TRINITY_DN1114_c0_g1_i6	393	NA	NA	+	TRINITY_DN1114_c0_g1_i6	NA	NA	NA	AA	AA	AA	AA	AG	AG
	UTRINITY_DN1114_c0_g1_i6_685	A/G	TRINITY_DN1114_c0_g1_i6	685	NA	NA	+	TRINITY_DN1114_c0_g1_i6	NA	NA	NA	AA	AA	AA	AA	AG	AG
	UTRINITY_DN1114_c0_g1_i6_801	A/S	TRINITY_DN1114_c0_g1_i6	801	NA	NA	+	TRINITY_DN1114_c0_g1_i6	NA	NA	NA	GC	GC	AA	AA	AA	AA
	UTRINITY_DN21219_c0_g1_i3_450	G/C	TRINITY_DN21219_c0_g1_i3	450	NA	NA	+	TRINITY_DN21219_c0_g1_i3	NA	NA	NA	GG	GG	GG	GG	GC	GC
	UTRINITY_DN14017_c0_g2_i4_965	C/T	TRINITY_DN14017_c0_g2_i4	965	NA	NA	+	TRINITY_DN14017_c0_g2_i4	NA	NA	NA	CT	CT	CT	CT	CC	CC
	UTRINITY_DN14017_c0_g2_i4_1101	G/A	TRINITY_DN14017_c0_g2_i4	1101	NA	NA	+	TRINITY_DN14017_c0_g2_i4	NA	NA	NA	AG	AG	AG	AG	GG	GG
	UTRINITY_DN12100_c0_g1_i8_2245	A/T	TRINITY_DN12100_c0_g1_i8	2245	NA	NA	+	TRINITY_DN12100_c0_g1_i8	NA	NA	NA	AA	AA	AT	AT	AT	AT
	UTRINITY_DN2607_c0_g1_i2_1014	G/A	TRINITY_DN2607_c0_g1_i2	1014	NA	NA	+	TRINITY_DN2607_c0_g1_i2	NA	NA	NA	GA	GA	GA	GA	GG	GG
	UTRINITY_DN11299_c0_g2_i1_39	T/G	TRINITY_DN11299_c0_g2_i1	39	NA	NA	+	TRINITY_DN11299_c0_g2_i1	NA	NA	NA	TG	TG	TG	TG	TT	TT
	UTRINITY_DN11299_c0_g2_i1_106	G/A	TRINITY_DN11299_c0_g2_i1	106	NA	NA	+	TRINITY_DN11299_c0_g2_i1	NA	NA	NA	GA	GA	GA	GA	GG	GG
	UTRINITY_DN11299_c0_g2_i1_142	G/A	TRINITY_DN11299_c0_g2_i1	142	NA	NA	+	TRINITY_DN11299_c0_g2_i1	NA	NA	NA	GG	GG	GG	GG	AG	AG
	UTRINITY_DN11299_c0_g2_i1_156	C/T	TRINITY_DN11299_c0_g2_i1	156	NA	NA	+	TRINITY_DN11299_c0_g2_i1	NA	NA	NA	CC	CC	CC	CC	TC	TC
	UTRINITY_DN11299_c0_g2_i1_157	C/T	TRINITY_DN11299_c0_g2_i1	157	NA	NA	+	TRINITY_DN11299_c0_g2_i1	NA	NA	NA	CC	CC	CC	CC	TC	TC
	UTRINITY_DN11299_c0_g2_i1_159	G/M	TRINITY_DN11299_c0_g2_i1	159	NA	NA	+	TRINITY_DN11299_c0_g2_i1	NA	NA	NA	GG	GG	GC	GC	AG	AG
	UTRINITY_DN11299_c0_g2_i1_292	G/C	TRINITY_DN11299_c0_g2_i1	292	NA	NA	+	TRINITY_DN11299_c0_g2_i1	NA	NA	NA	GG	GG	GG	GG	CC	CC
	UTRINITY_DN11299_c0_g2_i1_298	A/G	TRINITY_DN11299_c0_g2_i1	298	NA	NA	+	TRINITY_DN11299_c0_g2_i1	NA	NA	NA	AA	AA	AA	AA	GG	GG
	UTRINITY_DN5007_c0_g1_i3_2383	G/C	TRINITY_DN5007_c0_g1_i3	2383	NA	NA	+	TRINITY_DN5007_c0_g1_i3	NA	NA	NA	GC	GC	GG	GG	GC	GC
	UTRINITY_DN5007_c0_g1_i3_2386	T/C	TRINITY_DN5007_c0_g1_i3	2386	NA	NA	+	TRINITY_DN5007_c0_g1_i3	NA	NA	NA	TC	TC	TT	TT	TC	TC
	UTRINITY_DN123844_c0_g1_i6_204	A/G	TRINITY_DN123844_c0_g1_i6	204	NA	NA	+	TRINITY_DN123844_c0_g1_i6	NA	NA	NA	AA	AA	GG	GG	AA	AA
	UTRINITY_DN89048_c0_g1_i1_193	T/C	TRINITY_DN89048_c0_g1_i1	193	NA	NA	+	TRINITY_DN89048_c0_g1_i1	NA	NA	NA	CC	CC	TT	TT	TT	TT
	UTRINITY_DN42487_c0_g1_i1_268	C/T	TRINITY_DN42487_c0_g1_i1	268	NA	NA	+	TRINITY_DN42487_c0_g1_i1	NA	NA	NA	CC	CC	CC	CC	TT	TT
	UTRINITY_DN8843_c0_g1_i3_2176	G/C	TRINITY_DN8843_c0_g1_i3	2176	NA	NA	+	TRINITY_DN8843_c0_g1_i3	NA	NA	NA	GG	GG	GG	GG	CC	CC
	UTRINITY_DN29642_c0_g1_i4_93	A/G	TRINITY_DN29642_c0_g1_i4	93	NA	NA	+	TRINITY_DN29642_c0_g1_i4	NA	NA	NA	AA	AA	AA	AA	AG	AG
	UTRINITY_DN29642_c0_g1_i4_384	C/A	TRINITY_DN29642_c0_g1_i4	384	NA	NA	+	TRINITY_DN29642_c0_g1_i4	NA	NA	NA	CC	CC	CC	CC	AA	AA
	UTRINITY_DN31208_c3_g1_i1_88	A/T	TRINITY_DN31208_c3_g1_i1	88	NA	NA	+	TRINITY_DN31208_c3_g1_i1	NA	NA	NA	AA	AA	TT	TT	AA	AA
	UTRINITY_DN257_c1_g1_i1_980	C/K	TRINITY_DN257_c1_g1_i1	980	NA	NA	+	TRINITY_DN257_c1_g1_i1	NA	NA	NA	CT	CT	CG	CG	CT	CT
	UTRINITY_DN9011_c0_g1_i3_82	G/A	TRINITY_DN9011_c0_g1_i3	82	NA	NA	+	TRINITY_DN9011_c0_g1_i3	NA	NA	NA	GG	GG	GG	GG	AA	AA
	UTRINITY_DN9011_c0_g1_i3_83	C/T	TRINITY_DN9011_c0_g1_i3	83	NA	NA	+	TRINITY_DN9011_c0_g1_i3	NA	NA	NA	CC	CC	CC	CC	TT	TT
	UTRINITY_DN9011_c0_g1_i3_90	C/T	TRINITY_DN9011_c0_g1_i3	90	NA	NA	+	TRINITY_DN9011_c0_g1_i3	NA	NA	NA	CC	CC	CC	CC	TT	TT
	UTRINITY_DN11689_c0_g1_i2_2170	G/A	TRINITY_DN11689_c0_g1_i2	2170	NA	NA	+	TRINITY_DN11689_c0_g1_i2	NA	NA	NA	GA	GA	GG	GG	GA	GA
	UTRINITY_DN106_c0_g1_i4_242	G/A	TRINITY_DN106_c0_g1_i4	242	NA	NA	+	TRINITY_DN106_c0_g1_i4	NA	NA	NA	GG	GG	GG	GG	AA	AA
	UTRINITY_DN106_c0_g1_i4_640	A/G	TRINITY_DN106_c0_g1_i4	640	NA	NA	+	TRINITY_DN106_c0_g1_i4	NA	NA	NA	GG	GG	AA	AA	AA	AA
	UTRINITY_DN10366_c1_g2_i1_362	C/T	TRINITY_DN10366_c1_g2_i1	362	NA	NA	+	TRINITY_DN10366_c1_g2_i1	NA	NA	NA	CC	CC	TT	TT	CC	CC
	UTRINITY_DN26565_c0_g1_i1_136	A/C	TRINITY_DN26565_c0_g1_i1	136	NA	NA	+	TRINITY_DN26565_c0_g1_i1	NA	NA	NA	AA	AA	AC	AC	AA	AA
	UTRINITY_DN26565_c0_g1_i1_177	T/C	TRINITY_DN26565_c0_g1_i1	177	NA	NA	+	TRINITY_DN26565_c0_g1_i1	NA	NA	NA	TT	TT	TC	TC	TT	TT
	UTRINITY_DN13228_c0_g2_i7_1457	G/A	TRINITY_DN13228_c0_g2_i7	1457	NA	NA	+	TRINITY_DN13228_c0_g2_i7	NA	NA	NA	GG	GG	GG	GG	GA	GA
	UTRINITY_DN13228_c0_g2_i7_1460	A/G	TRINITY_DN13228_c0_g2_i7	1460	NA	NA	+	TRINITY_DN13228_c0_g2_i7	NA	NA	NA	AA	AA	AA	AA	AG	AG
	UTRINITY_DN13228_c0_g2_i7_1461	T/G	TRINITY_DN13228_c0_g2_i7	1461	NA	NA	+	TRINITY_DN13228_c0_g2_i7	NA	NA	NA	TT	TT	TT	TT	TG	TG
	UTRINITY_DN13228_c0_g2_i7_1464	G/C	TRINITY_DN13228_c0_g2_i7	1464	NA	NA	+	TRINITY_DN13228_c0_g2_i7	NA	NA	NA	GG	GG	GG	GG	GC	GC
	UTRINITY_DN35414_c0_g1_i5_156	T/C	TRINITY_DN35414_c0_g1_i5	156	NA	NA	+	TRINITY_DN35414_c0_g1_i5	NA	NA	NA	TT	TT	TT	TT	CC	CC
	UTRINITY_DN35414_c0_g1_i5_161	A/C	TRINITY_DN35414_c0_g1_i5	161	NA	NA	+	TRINITY_DN35414_c0_g1_i5	NA	NA	NA	AA	AA	AA	AA	CC	CC
	UTRINITY_DN35414_c0_g1_i5_164	G/C	TRINITY_DN35414_c0_g1_i5	164	NA	NA	+	TRINITY_DN35414_c0_g1_i5	NA	NA	NA	GG	GG	GG	GG	CC	CC
	UTRINITY_DN35414_c0_g1_i5_169	T/C	TRINITY_DN35414_c0_g1_i5	169	NA	NA	+	TRINITY_DN35414_c0_g1_i5	NA	NA	NA	TT	TT	TT	TT	CC	CC
	UTRINITY_DN37461_c1_g1_i1_77	T/C	TRINITY_DN37461_c1_g1_i1	77	NA	NA	+	TRINITY_DN37461_c1_g1_i1	NA	NA	NA	TT	TT	TT	TT	CC	CC
	UTRINITY_DN9960_c0_g1_i4_998	G/A	TRINITY_DN9960_c0_g1_i4	998	NA	NA	+	TRINITY_DN9960_c0_g1_i4	NA	NA	NA	GG	GG	AA	AA	GG	GG
	UTRINITY_DN6461_c0_g1_i4_847	A/G	TRINITY_DN6461_c0_g1_i4	847	NA	NA	+	TRINITY_DN6461_c0_g1_i4	NA	NA	NA	AA	AA	AA	AA	GG	GG
	UTRINITY_DN1570_c1_g1_i1_283	T/G	TRINITY_DN1570_c1_g1_i1	283	NA	NA	+	TRINITY_DN1570_c1_g1_i1	NA	NA	NA	TT	TT	TG	TG	TG	TG
	UTRINITY_DN3922_c0_g2_i4_336	G/A	TRINITY_DN3922_c0_g2_i4	336	NA	NA	+	TRINITY_DN3922_c0_g2_i4	NA	NA	NA	GG	GG	GG	GG	AA	AA
	UTRINITY_DN68339_c0_g2_i1_205	A/G	TRINITY_DN68339_c0_g2_i1	205	NA	NA	+	TRINITY_DN68339_c0_g2_i1	NA	NA	NA	AA	AA	AA	AA	GG	GG
	UTRINITY_DN68339_c0_g2_i1_215	T/C	TRINITY_DN68339_c0_g2_i1	215	NA	NA	+	TRINITY_DN68339_c0_g2_i1	NA	NA	NA	TT	TT	TT	TT	CC	CC
	UTRINITY_DN23116_c0_g1_i4_137	C/G	TRINITY_DN23116_c0_g1_i4	137	NA	NA	+	TRINITY_DN23116_c0_g1_i4	NA	NA	NA	CC	CC	CC	CC	GG	GG
	UTRINITY_DN23116_c0_g1_i4_138	G/T	TRINITY_DN23116_c0_g1_i4	138	NA	NA	+	TRINITY_DN23116_c0_g1_i4	NA	NA	NA	GG	GG	GG	GG	TT	TT
	UTRINITY_DN3849_c0_g1_i16_980	C/T	TRINITY_DN3849_c0_g1_i16	980	NA	NA	+	TRINITY_DN3849_c0_g1_i16	NA	NA	NA	CC	CC	CC	CC	TT	TT
	UTRINITY_DN13828_c0_g1_i1_97	C/T	TRINITY_DN13828_c0_g1_i1	97	NA	NA	+	TRINITY_DN13828_c0_g1_i1	NA	NA	NA	CC	CC	CC	CC	CT	CT
	UTRINITY_DN13828_c0_g1_i1_297	G/A	TRINITY_DN13828_c0_g1_i1	297	NA	NA	+	TRINITY_DN13828_c0_g1_i1	NA	NA	NA	GG	GG	GA	GA	GA	GA
	UTRINITY_DN33145_c0_g1_i1_346	C/T	TRINITY_DN33145_c0_g1_i1	346	NA	NA	+	TRINITY_DN33145_c0_g1_i1	NA	NA	NA	CC	CC	CC	CC	TT	TT
	UTRINITY_DN4913_c0_g1_i1_1004	A/G	TRINITY_DN4913_c0_g1_i1	1004	NA	NA	+	TRINITY_DN4913_c0_g1_i1	NA	NA	NA	AA	AA	AA	AA	GG	GG
	UTRINITY_DN38904_c0_g2_i1_241	A/G	TRINITY_DN38904_c0_g2_i1	241	NA	NA	+	TRINITY_DN38904_c0_g2_i1	NA	NA	NA	AG	AG	AG	AG	AA	AA
	UTRINITY_DN6379_c0_g1_i2_994	G/A	TRINITY_DN6379_c0_g1_i2	994	NA	NA	+	TRINITY_DN6379_c0_g1_i2	NA	NA	NA	GG	GG	GG	GG	AA	AA
	UTRINITY_DN6379_c0_g1_i2_995	C/T	TRINITY_DN6379_c0_g1_i2	995	NA	NA	+	TRINITY_DN6379_c0_g1_i2	NA	NA	NA	CC	CC	CC	CC	TT	TT
	UTRINITY_DN30122_c0_g3_i1_119	A/G	TRINITY_DN30122_c0_g3_i1	119	NA	NA	+	TRINITY_DN30122_c0_g3_i1	NA	NA	NA	AA	AA	GG	GG	AA	AA
	UTRINITY_DN30122_c0_g3_i1_191	T/C	TRINITY_DN30122_c0_g3_i1	191	NA	NA	+	TRINITY_DN30122_c0_g3_i1	NA	NA	NA	TT	TT	TT	TT	CC	CC
	UTRINITY_DN30122_c0_g3_i1_326	A/G	TRINITY_DN30122_c0_g3_i1	326	NA	NA	+	TRINITY_DN30122_c0_g3_i1	NA	NA	NA	AA	AA	GG	GG	AA	AA
	UTRINITY_DN30122_c0_g3_i1_467	A/C	TRINITY_DN30122_c0_g3_i1	467	NA	NA	+	TRINITY_DN30122_c0_g3_i1	NA	NA	NA	AA	AA	CC	CC	AA	AA
	UTRINITY_DN30122_c0_g3_i1_494	G/C	TRINITY_DN30122_c0_g3_i1	494	NA	NA	+	TRINITY_DN30122_c0_g3_i1	NA	NA	NA	GG	GG	CC	CC	GG	GG
	UTRINITY_DN17155_c0_g1_i2_438	G/C	TRINITY_DN17155_c0_g1_i2	438	NA	NA	+	TRINITY_DN17155_c0_g1_i2	NA	NA	NA	GC	GC	GG	GG	GG	GG
	UTRINITY_DN3752_c2_g1_i14_384	T/C	TRINITY_DN3752_c2_g1_i14	384	NA	NA	+	TRINITY_DN3752_c2_g1_i14	NA	NA	NA	TT	TT	TT	TT	CC	CC
	UTRINITY_DN22049_c0_g1_i1_145	A/G	TRINITY_DN22049_c0_g1_i1	145	NA	NA	+	TRINITY_DN22049_c0_g1_i1	NA	NA	NA	AA	AA	AA	AA	GG	GG
	UTRINITY_DN12953_c1_g1_i1_805	T/C	TRINITY_DN12953_c1_g1_i1	805	NA	NA	+	TRINITY_DN12953_c1_g1_i1	NA	NA	NA	TT	TT	CC	CC	TT	TT
	UTRINITY_DN12953_c1_g1_i1_845	G/C	TRINITY_DN12953_c1_g1_i1	845	NA	NA	+	TRINITY_DN12953_c1_g1_i1	NA	NA	NA	GG	GG	GG	GG	CC	CC
	UTRINITY_DN356_c0_g1_i3_430	C/T	TRINITY_DN356_c0_g1_i3	430	NA	NA	+	TRINITY_DN356_c0_g1_i3	NA	NA	NA	TT	TT	CC	CC	CC	CC
	UTRINITY_DN19079_c0_g3_i1_132	C/T	TRINITY_DN19079_c0_g3_i1	132	NA	NA	+	TRINITY_DN19079_c0_g3_i1	NA	NA	NA	TT	TT	CC	CC	CC	CC
	UTRINITY_DN8371_c0_g1_i5_773	T/C	TRINITY_DN8371_c0_g1_i5	773	NA	NA	+	TRINITY_DN8371_c0_g1_i5	NA	NA	NA	TT	TT	CC	CC	TT	TT
	UTRINITY_DN8371_c0_g1_i5_782	A/G	TRINITY_DN8371_c0_g1_i5	782	NA	NA	+	TRINITY_DN8371_c0_g1_i5	NA	NA	NA	AA	AA	GG	GG	AA	AA
	UTRINITY_DN4665_c0_g1_i3_365	G/A	TRINITY_DN4665_c0_g1_i3	365	NA	NA	+	TRINITY_DN4665_c0_g1_i3	NA	NA	NA	GG	GG	GG	GG	AA	AA
	UTRINITY_DN46143_c0_g1_i3_2387	G/T	TRINITY_DN46143_c0_g1_i3	2387	NA	NA	+	TRINITY_DN46143_c0_g1_i3	NA	NA	NA	GG	GG	TT	TT	GG	GG
	UTRINITY_DN46143_c0_g1_i3_2396	G/A	TRINITY_DN46143_c0_g1_i3	2396	NA	NA	+	TRINITY_DN46143_c0_g1_i3	NA	NA	NA	GG	GG	AA	AA	GG	GG
	UTRINITY_DN46143_c0_g1_i3_2404	A/G	TRINITY_DN46143_c0_g1_i3	2404	NA	NA	+	TRINITY_DN46143_c0_g1_i3	NA	NA	NA	AA	AA	GG	GG	AA	AA
	UTRINITY_DN17096_c0_g1_i2_921	C/T	TRINITY_DN17096_c0_g1_i2	921	NA	NA	+	TRINITY_DN17096_c0_g1_i2	NA	NA	NA	CT	CT	CC	CC	CC	CC
	UTRINITY_DN17096_c0_g1_i2_956	C/T	TRINITY_DN17096_c0_g1_i2	956	NA	NA	+	TRINITY_DN17096_c0_g1_i2	NA	NA	NA	CT	CT	CC	CC	CC	CC
	UTRINITY_DN17096_c0_g1_i2_960	T/G	TRINITY_DN17096_c0_g1_i2	960	NA	NA	+	TRINITY_DN17096_c0_g1_i2	NA	NA	NA	TG	TG	TT	TT	TT	TT
	UTRINITY_DN1782_c0_g1_i3_170	G/T	TRINITY_DN1782_c0_g1_i3	170	NA	NA	+	TRINITY_DN1782_c0_g1_i3	NA	NA	NA	GG	GG	GT	GT	GT	GT
	UTRINITY_DN1782_c0_g1_i3_171	C/T	TRINITY_DN1782_c0_g1_i3	171	NA	NA	+	TRINITY_DN1782_c0_g1_i3	NA	NA	NA	CC	CC	CT	CT	CT	CT
	UTRINITY_DN1782_c0_g1_i3_172	A/T	TRINITY_DN1782_c0_g1_i3	172	NA	NA	+	TRINITY_DN1782_c0_g1_i3	NA	NA	NA	AA	AA	AT	AT	AT	AT
	UTRINITY_DN1782_c0_g1_i3_196	A/G	TRINITY_DN1782_c0_g1_i3	196	NA	NA	+	TRINITY_DN1782_c0_g1_i3	NA	NA	NA	AA	AA	AG	AG	AG	AG
	UTRINITY_DN3208_c0_g1_i5_1401	T/C	TRINITY_DN3208_c0_g1_i5	1401	NA	NA	+	TRINITY_DN3208_c0_g1_i5	NA	NA	NA	TT	TT	TC	TC	TC	TC
	UTRINITY_DN3424_c3_g1_i1_49	T/C	TRINITY_DN3424_c3_g1_i1	49	NA	NA	+	TRINITY_DN3424_c3_g1_i1	NA	NA	NA	CC	CC	TT	TT	TT	TT
	UTRINITY_DN3424_c3_g1_i1_73	C/G	TRINITY_DN3424_c3_g1_i1	73	NA	NA	+	TRINITY_DN3424_c3_g1_i1	NA	NA	NA	GG	GG	CC	CC	CC	CC
	UTRINITY_DN5111_c0_g1_i2_2141	C/T	TRINITY_DN5111_c0_g1_i2	2141	NA	NA	+	TRINITY_DN5111_c0_g1_i2	NA	NA	NA	CC	CC	CC	CC	TT	TT
	UTRINITY_DN5111_c0_g1_i2_2143	T/C	TRINITY_DN5111_c0_g1_i2	2143	NA	NA	+	TRINITY_DN5111_c0_g1_i2	NA	NA	NA	TT	TT	TT	TT	CC	CC
	UTRINITY_DN5111_c0_g1_i2_2149	A/G	TRINITY_DN5111_c0_g1_i2	2149	NA	NA	+	TRINITY_DN5111_c0_g1_i2	NA	NA	NA	GG	GG	AA	AA	AA	AA
	UTRINITY_DN8412_c1_g3_i1_902	G/A	TRINITY_DN8412_c1_g3_i1	902	NA	NA	+	TRINITY_DN8412_c1_g3_i1	NA	NA	NA	GG	GG	GG	GG	GA	GA
	UTRINITY_DN8412_c1_g3_i1_1068	T/C	TRINITY_DN8412_c1_g3_i1	1068	NA	NA	+	TRINITY_DN8412_c1_g3_i1	NA	NA	NA	TT	TT	TT	TT	TC	TC
	UTRINITY_DN6500_c0_g1_i5_787	A/K	TRINITY_DN6500_c0_g1_i5	787	NA	NA	+	TRINITY_DN6500_c0_g1_i5	NA	NA	NA	AA	AA	AA	AA	TG	TG
	UTRINITY_DN12565_c0_g1_i2_1456	A/C	TRINITY_DN12565_c0_g1_i2	1456	NA	NA	+	TRINITY_DN12565_c0_g1_i2	NA	NA	NA	AA	AA	AA	AA	CC	CC
	UTRINITY_DN12565_c0_g1_i2_1574	T/A	TRINITY_DN12565_c0_g1_i2	1574	NA	NA	+	TRINITY_DN12565_c0_g1_i2	NA	NA	NA	TT	TT	TT	TT	AA	AA
	UTRINITY_DN25482_c1_g2_i2_357	A/G	TRINITY_DN25482_c1_g2_i2	357	NA	NA	+	TRINITY_DN25482_c1_g2_i2	NA	NA	NA	AA	AA	AA	AA	AG	AG
	UTRINITY_DN12882_c0_g1_i1_812	G/T	TRINITY_DN12882_c0_g1_i1	812	NA	NA	+	TRINITY_DN12882_c0_g1_i1	NA	NA	NA	TT	TT	GG	GG	GG	GG
	UTRINITY_DN12882_c0_g1_i1_815	A/G	TRINITY_DN12882_c0_g1_i1	815	NA	NA	+	TRINITY_DN12882_c0_g1_i1	NA	NA	NA	GG	GG	AA	AA	AA	AA
	UTRINITY_DN12882_c0_g1_i1_873	A/G	TRINITY_DN12882_c0_g1_i1	873	NA	NA	+	TRINITY_DN12882_c0_g1_i1	NA	NA	NA	AA	AA	AA	AA	GG	GG
	UTRINITY_DN422_c0_g1_i3_807	C/T	TRINITY_DN422_c0_g1_i3	807	NA	NA	+	TRINITY_DN422_c0_g1_i3	NA	NA	NA	TT	TT	CC	CC	CC	CC
	UTRINITY_DN28834_c0_g1_i1_62	G/C	TRINITY_DN28834_c0_g1_i1	62	NA	NA	+	TRINITY_DN28834_c0_g1_i1	NA	NA	NA	GG	GG	GG	GG	CC	CC
	UTRINITY_DN28834_c0_g1_i1_149	T/C	TRINITY_DN28834_c0_g1_i1	149	NA	NA	+	TRINITY_DN28834_c0_g1_i1	NA	NA	NA	TT	TT	TT	TT	CC	CC
	UTRINITY_DN1248_c0_g1_i1_159	T/C	TRINITY_DN1248_c0_g1_i1	159	NA	NA	+	TRINITY_DN1248_c0_g1_i1	NA	NA	NA	TT	TT	CC	CC	TT	TT
	UTRINITY_DN16777_c0_g1_i4_525	T/C	TRINITY_DN16777_c0_g1_i4	525	NA	NA	+	TRINITY_DN16777_c0_g1_i4	NA	NA	NA	TT	TT	CC	CC	TT	TT
	UTRINITY_DN1295_c0_g2_i1_94	C/A	TRINITY_DN1295_c0_g2_i1	94	NA	NA	+	TRINITY_DN1295_c0_g2_i1	NA	NA	NA	CC	CC	CC	CC	CA	CA
	UTRINITY_DN1295_c0_g2_i1_106	C/G	TRINITY_DN1295_c0_g2_i1	106	NA	NA	+	TRINITY_DN1295_c0_g2_i1	NA	NA	NA	CG	CG	CG	CG	CC	CC
	UTRINITY_DN168_c0_g2_i3_1647	A/G	TRINITY_DN168_c0_g2_i3	1647	NA	NA	+	TRINITY_DN168_c0_g2_i3	NA	NA	NA	AA	AA	AA	AA	GG	GG
	UTRINITY_DN4822_c0_g1_i3_314	C/A	TRINITY_DN4822_c0_g1_i3	314	NA	NA	+	TRINITY_DN4822_c0_g1_i3	NA	NA	NA	CC	CC	AA	AA	CC	CC
	UTRINITY_DN4822_c0_g1_i3_315	A/C	TRINITY_DN4822_c0_g1_i3	315	NA	NA	+	TRINITY_DN4822_c0_g1_i3	NA	NA	NA	AA	AA	CC	CC	AA	AA
	UTRINITY_DN23477_c0_g1_i2_211	T/C	TRINITY_DN23477_c0_g1_i2	211	NA	NA	+	TRINITY_DN23477_c0_g1_i2	NA	NA	NA	TT	TT	TT	TT	CC	CC
	UTRINITY_DN3845_c0_g1_i3_1405	T/C	TRINITY_DN3845_c0_g1_i3	1405	NA	NA	+	TRINITY_DN3845_c0_g1_i3	NA	NA	NA	CC	CC	TT	TT	TT	TT
	UTRINITY_DN3845_c0_g1_i3_1411	A/G	TRINITY_DN3845_c0_g1_i3	1411	NA	NA	+	TRINITY_DN3845_c0_g1_i3	NA	NA	NA	GG	GG	AA	AA	AA	AA
	UTRINITY_DN1859_c0_g1_i7_1753	A/C	TRINITY_DN1859_c0_g1_i7	1753	NA	NA	+	TRINITY_DN1859_c0_g1_i7	NA	NA	NA	AA	AA	AA	AA	CC	CC
	UTRINITY_DN4714_c0_g1_i10_301	C/T	TRINITY_DN4714_c0_g1_i10	301	NA	NA	+	TRINITY_DN4714_c0_g1_i10	NA	NA	NA	CC	CC	TT	TT	CC	CC
	UTRINITY_DN9900_c0_g1_i1_323	T/C	TRINITY_DN9900_c0_g1_i1	323	NA	NA	+	TRINITY_DN9900_c0_g1_i1	NA	NA	NA	TT	TT	TT	TT	CC	CC
	UTRINITY_DN3856_c1_g1_i6_442	T/C	TRINITY_DN3856_c1_g1_i6	442	NA	NA	+	TRINITY_DN3856_c1_g1_i6	NA	NA	NA	TT	TT	TT	TT	TC	TC
	UTRINITY_DN15683_c0_g2_i1_71	T/C	TRINITY_DN15683_c0_g2_i1	71	NA	NA	+	TRINITY_DN15683_c0_g2_i1	NA	NA	NA	TT	TT	TT	TT	CC	CC
	UTRINITY_DN15683_c0_g2_i1_212	A/G	TRINITY_DN15683_c0_g2_i1	212	NA	NA	+	TRINITY_DN15683_c0_g2_i1	NA	NA	NA	AG	AG	AG	AG	AA	AA
	UTRINITY_DN15683_c0_g2_i1_219	G/A	TRINITY_DN15683_c0_g2_i1	219	NA	NA	+	TRINITY_DN15683_c0_g2_i1	NA	NA	NA	GA	GA	GA	GA	GG	GG
	UTRINITY_DN15683_c0_g2_i1_227	A/G	TRINITY_DN15683_c0_g2_i1	227	NA	NA	+	TRINITY_DN15683_c0_g2_i1	NA	NA	NA	AG	AG	AG	AG	AA	AA
	UTRINITY_DN15683_c0_g2_i1_239	G/A	TRINITY_DN15683_c0_g2_i1	239	NA	NA	+	TRINITY_DN15683_c0_g2_i1	NA	NA	NA	GA	GA	GA	GA	GG	GG
	UTRINITY_DN15683_c0_g2_i1_308	G/T	TRINITY_DN15683_c0_g2_i1	308	NA	NA	+	TRINITY_DN15683_c0_g2_i1	NA	NA	NA	GG	GG	GG	GG	GT	GT
	UTRINITY_DN15683_c0_g2_i1_333	T/G	TRINITY_DN15683_c0_g2_i1	333	NA	NA	+	TRINITY_DN15683_c0_g2_i1	NA	NA	NA	TT	TT	TT	TT	TG	TG
	UTRINITY_DN15683_c0_g2_i1_356	C/G	TRINITY_DN15683_c0_g2_i1	356	NA	NA	+	TRINITY_DN15683_c0_g2_i1	NA	NA	NA	CG	CG	CG	CG	CC	CC
	UTRINITY_DN15683_c0_g2_i1_371	G/A	TRINITY_DN15683_c0_g2_i1	371	NA	NA	+	TRINITY_DN15683_c0_g2_i1	NA	NA	NA	GG	GG	GG	GG	GA	GA
	UTRINITY_DN15683_c0_g2_i1_467	T/C	TRINITY_DN15683_c0_g2_i1	467	NA	NA	+	TRINITY_DN15683_c0_g2_i1	NA	NA	NA	TC	TC	TC	TC	TT	TT
	UTRINITY_DN15683_c0_g2_i1_487	T/C	TRINITY_DN15683_c0_g2_i1	487	NA	NA	+	TRINITY_DN15683_c0_g2_i1	NA	NA	NA	TC	TC	TC	TC	TT	TT
	UTRINITY_DN15683_c0_g2_i1_884	C/K	TRINITY_DN15683_c0_g2_i1	884	NA	NA	+	TRINITY_DN15683_c0_g2_i1	NA	NA	NA	GC	GC	GC	GC	CT	CT
	UTRINITY_DN15683_c0_g2_i1_936	G/A	TRINITY_DN15683_c0_g2_i1	936	NA	NA	+	TRINITY_DN15683_c0_g2_i1	NA	NA	NA	GA	GA	GA	GA	GG	GG
	UTRINITY_DN15683_c0_g2_i1_980	A/G	TRINITY_DN15683_c0_g2_i1	980	NA	NA	+	TRINITY_DN15683_c0_g2_i1	NA	NA	NA	AG	AG	AG	AG	AA	AA
	UTRINITY_DN15683_c0_g2_i1_1001	T/C	TRINITY_DN15683_c0_g2_i1	1001	NA	NA	+	TRINITY_DN15683_c0_g2_i1	NA	NA	NA	TT	TT	TT	TT	TC	TC
	UTRINITY_DN15683_c0_g2_i1_1020	A/G	TRINITY_DN15683_c0_g2_i1	1020	NA	NA	+	TRINITY_DN15683_c0_g2_i1	NA	NA	NA	AG	AG	AG	AG	AA	AA
	UTRINITY_DN15683_c0_g2_i1_1028	T/C	TRINITY_DN15683_c0_g2_i1	1028	NA	NA	+	TRINITY_DN15683_c0_g2_i1	NA	NA	NA	TC	TC	TC	TC	TT	TT
	UTRINITY_DN15683_c0_g2_i1_1094	A/G	TRINITY_DN15683_c0_g2_i1	1094	NA	NA	+	TRINITY_DN15683_c0_g2_i1	NA	NA	NA	AG	AG	AG	AG	AA	AA
	UTRINITY_DN15683_c0_g2_i1_1116	T/G	TRINITY_DN15683_c0_g2_i1	1116	NA	NA	+	TRINITY_DN15683_c0_g2_i1	NA	NA	NA	TT	TT	TT	TT	TG	TG
	UTRINITY_DN15683_c0_g2_i1_1156	G/A	TRINITY_DN15683_c0_g2_i1	1156	NA	NA	+	TRINITY_DN15683_c0_g2_i1	NA	NA	NA	GG	GG	GG	GG	GA	GA
	UTRINITY_DN15683_c0_g2_i1_1193	C/T	TRINITY_DN15683_c0_g2_i1	1193	NA	NA	+	TRINITY_DN15683_c0_g2_i1	NA	NA	NA	CC	CC	CC	CC	CT	CT
	UTRINITY_DN15683_c0_g2_i1_1265	C/A	TRINITY_DN15683_c0_g2_i1	1265	NA	NA	+	TRINITY_DN15683_c0_g2_i1	NA	NA	NA	CA	CA	CA	CA	CC	CC
	UTRINITY_DN15683_c0_g2_i1_1325	T/C	TRINITY_DN15683_c0_g2_i1	1325	NA	NA	+	TRINITY_DN15683_c0_g2_i1	NA	NA	NA	TC	TC	TC	TC	TT	TT
	UTRINITY_DN15683_c0_g2_i1_1355	T/C	TRINITY_DN15683_c0_g2_i1	1355	NA	NA	+	TRINITY_DN15683_c0_g2_i1	NA	NA	NA	TC	TC	TC	TC	TT	TT
	UTRINITY_DN15683_c0_g2_i1_1356	C/T	TRINITY_DN15683_c0_g2_i1	1356	NA	NA	+	TRINITY_DN15683_c0_g2_i1	NA	NA	NA	CT	CT	CT	CT	CC	CC
	UTRINITY_DN15683_c0_g2_i1_1364	A/G	TRINITY_DN15683_c0_g2_i1	1364	NA	NA	+	TRINITY_DN15683_c0_g2_i1	NA	NA	NA	AG	AG	AG	AG	AA	AA
	UTRINITY_DN15683_c0_g2_i1_1365	C/T	TRINITY_DN15683_c0_g2_i1	1365	NA	NA	+	TRINITY_DN15683_c0_g2_i1	NA	NA	NA	CT	CT	CT	CT	CC	CC
	UTRINITY_DN15683_c0_g2_i1_1378	A/C	TRINITY_DN15683_c0_g2_i1	1378	NA	NA	+	TRINITY_DN15683_c0_g2_i1	NA	NA	NA	AC	AC	AC	AC	AA	AA
	UTRINITY_DN22879_c0_g1_i1_130	T/G	TRINITY_DN22879_c0_g1_i1	130	NA	NA	+	TRINITY_DN22879_c0_g1_i1	NA	NA	NA	TT	TT	TT	TT	GG	GG
	UTRINITY_DN946_c0_g1_i17_260	A/G	TRINITY_DN946_c0_g1_i17	260	NA	NA	+	TRINITY_DN946_c0_g1_i17	NA	NA	NA	AA	AA	AA	AA	GG	GG
	UTRINITY_DN946_c0_g1_i17_268	C/T	TRINITY_DN946_c0_g1_i17	268	NA	NA	+	TRINITY_DN946_c0_g1_i17	NA	NA	NA	CC	CC	CC	CC	TT	TT
	UTRINITY_DN27165_c0_g2_i4_191	A/G	TRINITY_DN27165_c0_g2_i4	191	NA	NA	+	TRINITY_DN27165_c0_g2_i4	NA	NA	NA	AA	AA	AA	AA	GG	GG
	UTRINITY_DN8400_c0_g2_i1_508	C/A	TRINITY_DN8400_c0_g2_i1	508	NA	NA	+	TRINITY_DN8400_c0_g2_i1	NA	NA	NA	CC	CC	CA	CA	CC	CC
	UTRINITY_DN8400_c0_g2_i1_541	C/T	TRINITY_DN8400_c0_g2_i1	541	NA	NA	+	TRINITY_DN8400_c0_g2_i1	NA	NA	NA	CT	CT	CT	CT	CC	CC
	UTRINITY_DN8400_c0_g2_i1_562	C/T	TRINITY_DN8400_c0_g2_i1	562	NA	NA	+	TRINITY_DN8400_c0_g2_i1	NA	NA	NA	CC	CC	CC	CC	CT	CT
	UTRINITY_DN8400_c0_g2_i1_721	T/C	TRINITY_DN8400_c0_g2_i1	721	NA	NA	+	TRINITY_DN8400_c0_g2_i1	NA	NA	NA	TC	TC	TT	TT	TC	TC
	UTRINITY_DN4978_c2_g1_i3_22	T/G	TRINITY_DN4978_c2_g1_i3	22	NA	NA	+	TRINITY_DN4978_c2_g1_i3	NA	NA	NA	GG	GG	TT	TT	TT	TT
	UTRINITY_DN4978_c2_g1_i3_90	T/C	TRINITY_DN4978_c2_g1_i3	90	NA	NA	+	TRINITY_DN4978_c2_g1_i3	NA	NA	NA	TT	TT	TT	TT	TC	TC
	UTRINITY_DN4978_c2_g1_i3_190	G/C	TRINITY_DN4978_c2_g1_i3	190	NA	NA	+	TRINITY_DN4978_c2_g1_i3	NA	NA	NA	GG	GG	GG	GG	GC	GC
	UTRINITY_DN4978_c2_g1_i3_249	G/T	TRINITY_DN4978_c2_g1_i3	249	NA	NA	+	TRINITY_DN4978_c2_g1_i3	NA	NA	NA	GT	GT	GT	GT	GG	GG
	UTRINITY_DN4978_c2_g1_i3_269	A/G	TRINITY_DN4978_c2_g1_i3	269	NA	NA	+	TRINITY_DN4978_c2_g1_i3	NA	NA	NA	AA	AA	AG	AG	AA	AA
	UTRINITY_DN39364_c0_g1_i1_186	A/G	TRINITY_DN39364_c0_g1_i1	186	NA	NA	+	TRINITY_DN39364_c0_g1_i1	NA	NA	NA	AA	AA	AA	AA	GG	GG
	UTRINITY_DN6850_c0_g1_i2_794	T/C	TRINITY_DN6850_c0_g1_i2	794	NA	NA	+	TRINITY_DN6850_c0_g1_i2	NA	NA	NA	TT	TT	TT	TT	CC	CC
	UTRINITY_DN629_c0_g1_i4_939	C/G	TRINITY_DN629_c0_g1_i4	939	NA	NA	+	TRINITY_DN629_c0_g1_i4	NA	NA	NA	CC	CC	CC	CC	GG	GG
	UTRINITY_DN2323_c0_g1_i4_888	T/C	TRINITY_DN2323_c0_g1_i4	888	NA	NA	+	TRINITY_DN2323_c0_g1_i4	NA	NA	NA	CC	CC	TT	TT	TT	TT
	UTRINITY_DN2323_c0_g1_i4_1567	T/A	TRINITY_DN2323_c0_g1_i4	1567	NA	NA	+	TRINITY_DN2323_c0_g1_i4	NA	NA	NA	TT	TT	TT	TT	AA	AA
	UTRINITY_DN2323_c0_g1_i4_1632	G/A	TRINITY_DN2323_c0_g1_i4	1632	NA	NA	+	TRINITY_DN2323_c0_g1_i4	NA	NA	NA	GG	GG	GG	GG	AA	AA
	UTRINITY_DN956_c0_g1_i9_664	G/A	TRINITY_DN956_c0_g1_i9	664	NA	NA	+	TRINITY_DN956_c0_g1_i9	NA	NA	NA	GG	GG	GG	GG	AA	AA
	UTRINITY_DN956_c0_g1_i9_666	A/C	TRINITY_DN956_c0_g1_i9	666	NA	NA	+	TRINITY_DN956_c0_g1_i9	NA	NA	NA	AA	AA	AA	AA	CC	CC
	UTRINITY_DN956_c0_g1_i9_674	T/C	TRINITY_DN956_c0_g1_i9	674	NA	NA	+	TRINITY_DN956_c0_g1_i9	NA	NA	NA	TT	TT	TT	TT	CC	CC
	UTRINITY_DN956_c0_g1_i9_675	T/C	TRINITY_DN956_c0_g1_i9	675	NA	NA	+	TRINITY_DN956_c0_g1_i9	NA	NA	NA	TT	TT	TT	TT	CC	CC
	UTRINITY_DN956_c0_g1_i9_703	G/C	TRINITY_DN956_c0_g1_i9	703	NA	NA	+	TRINITY_DN956_c0_g1_i9	NA	NA	NA	GG	GG	GG	GG	CC	CC
	UTRINITY_DN956_c0_g1_i9_758	T/C	TRINITY_DN956_c0_g1_i9	758	NA	NA	+	TRINITY_DN956_c0_g1_i9	NA	NA	NA	TT	TT	TT	TT	CC	CC
	UTRINITY_DN956_c0_g1_i9_765	C/T	TRINITY_DN956_c0_g1_i9	765	NA	NA	+	TRINITY_DN956_c0_g1_i9	NA	NA	NA	CC	CC	CC	CC	TT	TT
	UTRINITY_DN26412_c0_g1_i7_516	A/G	TRINITY_DN26412_c0_g1_i7	516	NA	NA	+	TRINITY_DN26412_c0_g1_i7	NA	NA	NA	AA	AA	GA	GA	GG	GG
	UTRINITY_DN17590_c1_g2_i2_237	T/C	TRINITY_DN17590_c1_g2_i2	237	NA	NA	+	TRINITY_DN17590_c1_g2_i2	NA	NA	NA	TT	TT	TC	TC	TT	TT
	UTRINITY_DN2086_c0_g1_i13_223	G/C	TRINITY_DN2086_c0_g1_i13	223	NA	NA	+	TRINITY_DN2086_c0_g1_i13	NA	NA	NA	CC	CC	GG	GG	GG	GG
	UTRINITY_DN2086_c0_g1_i13_241	G/A	TRINITY_DN2086_c0_g1_i13	241	NA	NA	+	TRINITY_DN2086_c0_g1_i13	NA	NA	NA	GG	GG	GG	GG	AA	AA
	UTRINITY_DN5982_c0_g1_i4_81	T/C	TRINITY_DN5982_c0_g1_i4	81	NA	NA	+	TRINITY_DN5982_c0_g1_i4	NA	NA	NA	TT	TT	TT	TT	CC	CC
	UTRINITY_DN12755_c0_g1_i2_1099	T/C	TRINITY_DN12755_c0_g1_i2	1099	NA	NA	+	TRINITY_DN12755_c0_g1_i2	NA	NA	NA	TT	TT	CC	CC	TT	TT
	UTRINITY_DN11460_c1_g1_i1_226	T/C	TRINITY_DN11460_c1_g1_i1	226	NA	NA	+	TRINITY_DN11460_c1_g1_i1	NA	NA	NA	TT	TT	TT	TT	CC	CC
	UTRINITY_DN11460_c1_g1_i1_240	C/G	TRINITY_DN11460_c1_g1_i1	240	NA	NA	+	TRINITY_DN11460_c1_g1_i1	NA	NA	NA	CC	CC	CC	CC	GG	GG
	UTRINITY_DN11460_c1_g1_i1_244	G/A	TRINITY_DN11460_c1_g1_i1	244	NA	NA	+	TRINITY_DN11460_c1_g1_i1	NA	NA	NA	GG	GG	GG	GG	AA	AA
	UTRINITY_DN19047_c0_g1_i5_329	A/G	TRINITY_DN19047_c0_g1_i5	329	NA	NA	+	TRINITY_DN19047_c0_g1_i5	NA	NA	NA	AA	AA	AA	AA	GG	GG
	UTRINITY_DN19047_c0_g1_i5_335	A/G	TRINITY_DN19047_c0_g1_i5	335	NA	NA	+	TRINITY_DN19047_c0_g1_i5	NA	NA	NA	AA	AA	AA	AA	GG	GG
	UTRINITY_DN19047_c0_g1_i5_588	A/C	TRINITY_DN19047_c0_g1_i5	588	NA	NA	+	TRINITY_DN19047_c0_g1_i5	NA	NA	NA	AA	AA	AA	AA	CC	CC
	UTRINITY_DN1181_c0_g1_i5_1771	A/G	TRINITY_DN1181_c0_g1_i5	1771	NA	NA	+	TRINITY_DN1181_c0_g1_i5	NA	NA	NA	AA	AA	AA	AA	GG	GG
	UTRINITY_DN1181_c0_g1_i5_1784	T/C	TRINITY_DN1181_c0_g1_i5	1784	NA	NA	+	TRINITY_DN1181_c0_g1_i5	NA	NA	NA	TT	TT	TT	TT	CC	CC
	UTRINITY_DN54383_c0_g1_i1_134	C/T	TRINITY_DN54383_c0_g1_i1	134	NA	NA	+	TRINITY_DN54383_c0_g1_i1	NA	NA	NA	CC	CC	CC	CC	TT	TT
	UTRINITY_DN2261_c0_g1_i2_1246	A/G	TRINITY_DN2261_c0_g1_i2	1246	NA	NA	+	TRINITY_DN2261_c0_g1_i2	NA	NA	NA	AA	AA	AA	AA	GG	GG
	UTRINITY_DN9144_c0_g1_i3_618	T/A	TRINITY_DN9144_c0_g1_i3	618	NA	NA	+	TRINITY_DN9144_c0_g1_i3	NA	NA	NA	AA	AA	TT	TT	TT	TT
	UTRINITY_DN17191_c0_g1_i5_2652	T/C	TRINITY_DN17191_c0_g1_i5	2652	NA	NA	+	TRINITY_DN17191_c0_g1_i5	NA	NA	NA	CC	CC	TT	TT	TT	TT
	UTRINITY_DN23837_c0_g1_i1_193	G/A	TRINITY_DN23837_c0_g1_i1	193	NA	NA	+	TRINITY_DN23837_c0_g1_i1	NA	NA	NA	GG	GG	GG	GG	AA	AA
	UTRINITY_DN22219_c0_g1_i2_1298	C/G	TRINITY_DN22219_c0_g1_i2	1298	NA	NA	+	TRINITY_DN22219_c0_g1_i2	NA	NA	NA	CC	CC	CC	CC	GG	GG
	UTRINITY_DN10081_c1_g1_i2_680	C/T	TRINITY_DN10081_c1_g1_i2	680	NA	NA	+	TRINITY_DN10081_c1_g1_i2	NA	NA	NA	CC	CC	CC	CC	CT	CT
	UTRINITY_DN46742_c0_g1_i2_393	G/A	TRINITY_DN46742_c0_g1_i2	393	NA	NA	+	TRINITY_DN46742_c0_g1_i2	NA	NA	NA	GG	GG	GG	GG	AA	AA
	UTRINITY_DN20508_c0_g1_i1_102	C/G	TRINITY_DN20508_c0_g1_i1	102	NA	NA	+	TRINITY_DN20508_c0_g1_i1	NA	NA	NA	CC	CC	CC	CC	GG	GG
	UTRINITY_DN20508_c0_g1_i1_114	C/G	TRINITY_DN20508_c0_g1_i1	114	NA	NA	+	TRINITY_DN20508_c0_g1_i1	NA	NA	NA	CC	CC	CC	CC	GG	GG
	UTRINITY_DN20508_c0_g1_i1_119	T/A	TRINITY_DN20508_c0_g1_i1	119	NA	NA	+	TRINITY_DN20508_c0_g1_i1	NA	NA	NA	TT	TT	TT	TT	AA	AA
	UTRINITY_DN30627_c0_g1_i1_46	T/C	TRINITY_DN30627_c0_g1_i1	46	NA	NA	+	TRINITY_DN30627_c0_g1_i1	NA	NA	NA	TT	TT	CC	CC	TT	TT
	UTRINITY_DN7172_c0_g2_i1_53	C/T	TRINITY_DN7172_c0_g2_i1	53	NA	NA	+	TRINITY_DN7172_c0_g2_i1	NA	NA	NA	CC	CC	TC	TC	TC	TC
	UTRINITY_DN1614_c0_g1_i10_72	T/C	TRINITY_DN1614_c0_g1_i10	72	NA	NA	+	TRINITY_DN1614_c0_g1_i10	NA	NA	NA	TT	TT	TC	TC	TT	TT
	UTRINITY_DN1614_c0_g1_i10_132	T/C	TRINITY_DN1614_c0_g1_i10	132	NA	NA	+	TRINITY_DN1614_c0_g1_i10	NA	NA	NA	TC	TC	TT	TT	TT	TT
	UTRINITY_DN1614_c0_g1_i10_133	G/A	TRINITY_DN1614_c0_g1_i10	133	NA	NA	+	TRINITY_DN1614_c0_g1_i10	NA	NA	NA	GA	GA	GG	GG	GG	GG
	UTRINITY_DN1614_c0_g1_i10_667	T/C	TRINITY_DN1614_c0_g1_i10	667	NA	NA	+	TRINITY_DN1614_c0_g1_i10	NA	NA	NA	TT	TT	TT	TT	TC	TC
	UTRINITY_DN1614_c0_g1_i10_693	C/T	TRINITY_DN1614_c0_g1_i10	693	NA	NA	+	TRINITY_DN1614_c0_g1_i10	NA	NA	NA	CC	CC	CC	CC	CT	CT
	UTRINITY_DN1614_c0_g1_i10_694	G/C	TRINITY_DN1614_c0_g1_i10	694	NA	NA	+	TRINITY_DN1614_c0_g1_i10	NA	NA	NA	GG	GG	GG	GG	GC	GC
	UTRINITY_DN10403_c0_g2_i2_73	T/C	TRINITY_DN10403_c0_g2_i2	73	NA	NA	+	TRINITY_DN10403_c0_g2_i2	NA	NA	NA	TT	TT	TT	TT	TC	TC
	UTRINITY_DN10403_c0_g2_i2_89	C/T	TRINITY_DN10403_c0_g2_i2	89	NA	NA	+	TRINITY_DN10403_c0_g2_i2	NA	NA	NA	CC	CC	CC	CC	CT	CT
	UTRINITY_DN10403_c0_g2_i2_103	T/C	TRINITY_DN10403_c0_g2_i2	103	NA	NA	+	TRINITY_DN10403_c0_g2_i2	NA	NA	NA	TT	TT	TT	TT	TC	TC
	UTRINITY_DN10403_c0_g2_i2_180	A/G	TRINITY_DN10403_c0_g2_i2	180	NA	NA	+	TRINITY_DN10403_c0_g2_i2	NA	NA	NA	AA	AA	AA	AA	AG	AG
	UTRINITY_DN60371_c0_g1_i2_320	G/T	TRINITY_DN60371_c0_g1_i2	320	NA	NA	+	TRINITY_DN60371_c0_g1_i2	NA	NA	NA	GG	GG	GG	GG	GT	GT
	UTRINITY_DN6201_c0_g1_i6_1258	T/C	TRINITY_DN6201_c0_g1_i6	1258	NA	NA	+	TRINITY_DN6201_c0_g1_i6	NA	NA	NA	CC	CC	TT	TT	TT	TT
	UTRINITY_DN6201_c0_g1_i6_1474	A/G	TRINITY_DN6201_c0_g1_i6	1474	NA	NA	+	TRINITY_DN6201_c0_g1_i6	NA	NA	NA	AG	AG	AG	AG	AA	AA
	UTRINITY_DN6201_c0_g1_i6_1524	A/G	TRINITY_DN6201_c0_g1_i6	1524	NA	NA	+	TRINITY_DN6201_c0_g1_i6	NA	NA	NA	AG	AG	AG	AG	AA	AA
	UTRINITY_DN6201_c0_g1_i6_1549	C/T	TRINITY_DN6201_c0_g1_i6	1549	NA	NA	+	TRINITY_DN6201_c0_g1_i6	NA	NA	NA	CT	CT	CT	CT	CC	CC
	UTRINITY_DN6201_c0_g1_i6_1646	A/T	TRINITY_DN6201_c0_g1_i6	1646	NA	NA	+	TRINITY_DN6201_c0_g1_i6	NA	NA	NA	AT	AT	AT	AT	AA	AA
	UTRINITY_DN6201_c0_g1_i6_1659	A/G	TRINITY_DN6201_c0_g1_i6	1659	NA	NA	+	TRINITY_DN6201_c0_g1_i6	NA	NA	NA	AG	AG	AG	AG	AA	AA
	UTRINITY_DN6201_c0_g1_i6_1660	G/C	TRINITY_DN6201_c0_g1_i6	1660	NA	NA	+	TRINITY_DN6201_c0_g1_i6	NA	NA	NA	GC	GC	GC	GC	GG	GG
	UTRINITY_DN27887_c0_g1_i2_390	C/G	TRINITY_DN27887_c0_g1_i2	390	NA	NA	+	TRINITY_DN27887_c0_g1_i2	NA	NA	NA	CC	CC	CC	CC	GG	GG
	UTRINITY_DN1725_c0_g1_i4_1126	C/T	TRINITY_DN1725_c0_g1_i4	1126	NA	NA	+	TRINITY_DN1725_c0_g1_i4	NA	NA	NA	TT	TT	CC	CC	CC	CC
	UTRINITY_DN40011_c0_g1_i2_163	C/A	TRINITY_DN40011_c0_g1_i2	163	NA	NA	+	TRINITY_DN40011_c0_g1_i2	NA	NA	NA	CC	CC	CC	CC	AA	AA
	UTRINITY_DN12997_c2_g1_i1_101	A/G	TRINITY_DN12997_c2_g1_i1	101	NA	NA	+	TRINITY_DN12997_c2_g1_i1	NA	NA	NA	AA	AA	AA	AA	GG	GG
	UTRINITY_DN12997_c2_g1_i1_140	G/A	TRINITY_DN12997_c2_g1_i1	140	NA	NA	+	TRINITY_DN12997_c2_g1_i1	NA	NA	NA	GG	GG	GG	GG	AA	AA
	UTRINITY_DN1159_c3_g3_i2_1682	T/C	TRINITY_DN1159_c3_g3_i2	1682	NA	NA	+	TRINITY_DN1159_c3_g3_i2	NA	NA	NA	TT	TT	TT	TT	CC	CC
	UTRINITY_DN1159_c3_g3_i2_1713	A/G	TRINITY_DN1159_c3_g3_i2	1713	NA	NA	+	TRINITY_DN1159_c3_g3_i2	NA	NA	NA	AA	AA	AA	AA	AG	AG
	UTRINITY_DN1159_c3_g3_i2_1864	C/T	TRINITY_DN1159_c3_g3_i2	1864	NA	NA	+	TRINITY_DN1159_c3_g3_i2	NA	NA	NA	CC	CC	TC	TC	TC	TC
	UTRINITY_DN35599_c0_g1_i1_114	G/A	TRINITY_DN35599_c0_g1_i1	114	NA	NA	+	TRINITY_DN35599_c0_g1_i1	NA	NA	NA	GG	GG	GG	GG	AA	AA
	UTRINITY_DN14280_c0_g1_i3_178	T/A	TRINITY_DN14280_c0_g1_i3	178	NA	NA	+	TRINITY_DN14280_c0_g1_i3	NA	NA	NA	TT	TT	TT	TT	AA	AA
	UTRINITY_DN13008_c0_g1_i7_1007	C/T	TRINITY_DN13008_c0_g1_i7	1007	NA	NA	+	TRINITY_DN13008_c0_g1_i7	NA	NA	NA	TC	TC	TC	TC	CC	CC
	UTRINITY_DN13008_c0_g1_i7_1014	G/A	TRINITY_DN13008_c0_g1_i7	1014	NA	NA	+	TRINITY_DN13008_c0_g1_i7	NA	NA	NA	AG	AG	AG	AG	GG	GG
	UTRINITY_DN13008_c0_g1_i7_1069	G/C	TRINITY_DN13008_c0_g1_i7	1069	NA	NA	+	TRINITY_DN13008_c0_g1_i7	NA	NA	NA	GC	GC	GG	GG	GG	GG
	UTRINITY_DN13008_c0_g1_i7_1313	G/A	TRINITY_DN13008_c0_g1_i7	1313	NA	NA	+	TRINITY_DN13008_c0_g1_i7	NA	NA	NA	GA	GA	GA	GA	GG	GG
	UTRINITY_DN13008_c0_g1_i7_1322	C/T	TRINITY_DN13008_c0_g1_i7	1322	NA	NA	+	TRINITY_DN13008_c0_g1_i7	NA	NA	NA	CT	CT	CT	CT	CC	CC
	UTRINITY_DN13008_c0_g1_i7_1359	T/C	TRINITY_DN13008_c0_g1_i7	1359	NA	NA	+	TRINITY_DN13008_c0_g1_i7	NA	NA	NA	TC	TC	TC	TC	TT	TT
	UTRINITY_DN13008_c0_g1_i7_1365	C/G	TRINITY_DN13008_c0_g1_i7	1365	NA	NA	+	TRINITY_DN13008_c0_g1_i7	NA	NA	NA	CG	CG	CG	CG	CC	CC
	UTRINITY_DN755_c0_g2_i7_528	C/G	TRINITY_DN755_c0_g2_i7	528	NA	NA	+	TRINITY_DN755_c0_g2_i7	NA	NA	NA	GG	GG	GC	GC	CC	CC
	UTRINITY_DN8183_c0_g1_i6_177	G/A	TRINITY_DN8183_c0_g1_i6	177	NA	NA	+	TRINITY_DN8183_c0_g1_i6	NA	NA	NA	GG	GG	GG	GG	AA	AA
	UTRINITY_DN8183_c0_g1_i6_301	G/C	TRINITY_DN8183_c0_g1_i6	301	NA	NA	+	TRINITY_DN8183_c0_g1_i6	NA	NA	NA	GG	GG	GG	GG	CC	CC
	UTRINITY_DN8183_c0_g1_i6_385	C/G	TRINITY_DN8183_c0_g1_i6	385	NA	NA	+	TRINITY_DN8183_c0_g1_i6	NA	NA	NA	GG	GG	CC	CC	CC	CC
	UTRINITY_DN8183_c0_g1_i6_500	T/A	TRINITY_DN8183_c0_g1_i6	500	NA	NA	+	TRINITY_DN8183_c0_g1_i6	NA	NA	NA	TT	TT	TT	TT	AA	AA
	UTRINITY_DN8183_c0_g1_i6_535	A/G	TRINITY_DN8183_c0_g1_i6	535	NA	NA	+	TRINITY_DN8183_c0_g1_i6	NA	NA	NA	AA	AA	AA	AA	GG	GG
	UTRINITY_DN49166_c0_g1_i3_2203	T/C	TRINITY_DN49166_c0_g1_i3	2203	NA	NA	+	TRINITY_DN49166_c0_g1_i3	NA	NA	NA	TT	TT	TT	TT	TC	TC
	UTRINITY_DN49166_c0_g1_i3_2707	C/T	TRINITY_DN49166_c0_g1_i3	2707	NA	NA	+	TRINITY_DN49166_c0_g1_i3	NA	NA	NA	CC	CC	CT	CT	CT	CT
	UTRINITY_DN27744_c0_g1_i1_1210	C/T	TRINITY_DN27744_c0_g1_i1	1210	NA	NA	+	TRINITY_DN27744_c0_g1_i1	NA	NA	NA	CT	CT	CC	CC	CC	CC
	UTRINITY_DN27744_c0_g1_i1_1265	C/T	TRINITY_DN27744_c0_g1_i1	1265	NA	NA	+	TRINITY_DN27744_c0_g1_i1	NA	NA	NA	CT	CT	CC	CC	CC	CC
	UTRINITY_DN27744_c0_g1_i1_1266	C/T	TRINITY_DN27744_c0_g1_i1	1266	NA	NA	+	TRINITY_DN27744_c0_g1_i1	NA	NA	NA	CT	CT	CC	CC	CC	CC
	UTRINITY_DN20171_c1_g1_i1_209	A/C	TRINITY_DN20171_c1_g1_i1	209	NA	NA	+	TRINITY_DN20171_c1_g1_i1	NA	NA	NA	AA	AA	AC	AC	AA	AA
	UTRINITY_DN20171_c1_g1_i1_264	A/G	TRINITY_DN20171_c1_g1_i1	264	NA	NA	+	TRINITY_DN20171_c1_g1_i1	NA	NA	NA	AA	AA	AG	AG	AA	AA
	UTRINITY_DN20171_c1_g1_i1_267	A/G	TRINITY_DN20171_c1_g1_i1	267	NA	NA	+	TRINITY_DN20171_c1_g1_i1	NA	NA	NA	AA	AA	AG	AG	AA	AA
	UTRINITY_DN9252_c0_g1_i2_1423	G/T	TRINITY_DN9252_c0_g1_i2	1423	NA	NA	+	TRINITY_DN9252_c0_g1_i2	NA	NA	NA	TT	TT	GG	GG	GG	GG
	UTRINITY_DN9380_c2_g1_i6_167	G/T	TRINITY_DN9380_c2_g1_i6	167	NA	NA	+	TRINITY_DN9380_c2_g1_i6	NA	NA	NA	GG	GG	GG	GG	TT	TT
	UTRINITY_DN9380_c2_g1_i6_168	T/G	TRINITY_DN9380_c2_g1_i6	168	NA	NA	+	TRINITY_DN9380_c2_g1_i6	NA	NA	NA	TT	TT	TT	TT	GG	GG
	UTRINITY_DN5992_c1_g2_i4_1002	G/A	TRINITY_DN5992_c1_g2_i4	1002	NA	NA	+	TRINITY_DN5992_c1_g2_i4	NA	NA	NA	GG	GG	GG	GG	GA	GA
	UTRINITY_DN5992_c1_g2_i4_1003	G/C	TRINITY_DN5992_c1_g2_i4	1003	NA	NA	+	TRINITY_DN5992_c1_g2_i4	NA	NA	NA	GG	GG	CG	CG	CG	CG
	UTRINITY_DN16046_c0_g2_i1_1146	A/G	TRINITY_DN16046_c0_g2_i1	1146	NA	NA	+	TRINITY_DN16046_c0_g2_i1	NA	NA	NA	AA	AA	GG	GG	AA	AA
	UTRINITY_DN16046_c0_g2_i1_1156	C/G	TRINITY_DN16046_c0_g2_i1	1156	NA	NA	+	TRINITY_DN16046_c0_g2_i1	NA	NA	NA	CC	CC	GG	GG	CC	CC
	UTRINITY_DN16046_c0_g2_i1_1167	C/T	TRINITY_DN16046_c0_g2_i1	1167	NA	NA	+	TRINITY_DN16046_c0_g2_i1	NA	NA	NA	CC	CC	TT	TT	CC	CC
	UTRINITY_DN16046_c0_g2_i1_1171	G/C	TRINITY_DN16046_c0_g2_i1	1171	NA	NA	+	TRINITY_DN16046_c0_g2_i1	NA	NA	NA	GG	GG	CC	CC	GG	GG
	UTRINITY_DN6617_c0_g1_i3_4500	G/A	TRINITY_DN6617_c0_g1_i3	4500	NA	NA	+	TRINITY_DN6617_c0_g1_i3	NA	NA	NA	GA	GA	GA	GA	GG	GG
	UTRINITY_DN6617_c0_g1_i3_4517	G/A	TRINITY_DN6617_c0_g1_i3	4517	NA	NA	+	TRINITY_DN6617_c0_g1_i3	NA	NA	NA	GA	GA	GA	GA	GG	GG
	UTRINITY_DN6617_c0_g1_i3_4524	T/C	TRINITY_DN6617_c0_g1_i3	4524	NA	NA	+	TRINITY_DN6617_c0_g1_i3	NA	NA	NA	TC	TC	TC	TC	TT	TT
	UTRINITY_DN6050_c0_g1_i5_446	A/C	TRINITY_DN6050_c0_g1_i5	446	NA	NA	+	TRINITY_DN6050_c0_g1_i5	NA	NA	NA	AA	AA	AA	AA	CC	CC
	UTRINITY_DN6050_c0_g1_i5_496	C/T	TRINITY_DN6050_c0_g1_i5	496	NA	NA	+	TRINITY_DN6050_c0_g1_i5	NA	NA	NA	CC	CC	CC	CC	TT	TT
	UTRINITY_DN2412_c0_g1_i5_5177	A/G	TRINITY_DN2412_c0_g1_i5	5177	NA	NA	+	TRINITY_DN2412_c0_g1_i5	NA	NA	NA	AA	AA	AA	AA	GG	GG
	UTRINITY_DN2412_c0_g1_i5_5398	A/G	TRINITY_DN2412_c0_g1_i5	5398	NA	NA	+	TRINITY_DN2412_c0_g1_i5	NA	NA	NA	AA	AA	AA	AA	GG	GG
	UTRINITY_DN2412_c0_g1_i5_5664	T/C	TRINITY_DN2412_c0_g1_i5	5664	NA	NA	+	TRINITY_DN2412_c0_g1_i5	NA	NA	NA	TT	TT	TT	TT	CC	CC
	UTRINITY_DN67320_c0_g1_i1_898	T/C	TRINITY_DN67320_c0_g1_i1	898	NA	NA	+	TRINITY_DN67320_c0_g1_i1	NA	NA	NA	TT	TT	CC	CC	TT	TT
	UTRINITY_DN8308_c0_g1_i6_211	T/C	TRINITY_DN8308_c0_g1_i6	211	NA	NA	+	TRINITY_DN8308_c0_g1_i6	NA	NA	NA	CC	CC	TT	TT	TT	TT
	UTRINITY_DN5802_c0_g1_i1_401	G/C	TRINITY_DN5802_c0_g1_i1	401	NA	NA	+	TRINITY_DN5802_c0_g1_i1	NA	NA	NA	GG	GG	GG	GG	CC	CC
	UTRINITY_DN5802_c0_g1_i1_850	C/G	TRINITY_DN5802_c0_g1_i1	850	NA	NA	+	TRINITY_DN5802_c0_g1_i1	NA	NA	NA	CC	CC	CC	CC	GG	GG
	UTRINITY_DN2740_c0_g1_i5_2899	T/C	TRINITY_DN2740_c0_g1_i5	2899	NA	NA	+	TRINITY_DN2740_c0_g1_i5	NA	NA	NA	TT	TT	TT	TT	CC	CC
	UTRINITY_DN3102_c0_g1_i1_390	T/C	TRINITY_DN3102_c0_g1_i1	390	NA	NA	+	TRINITY_DN3102_c0_g1_i1	NA	NA	NA	CC	CC	TT	TT	TT	TT
	UTRINITY_DN3102_c0_g1_i1_1353	A/G	TRINITY_DN3102_c0_g1_i1	1353	NA	NA	+	TRINITY_DN3102_c0_g1_i1	NA	NA	NA	AA	AA	AA	AA	GG	GG
	UTRINITY_DN44787_c0_g1_i1_134	T/A	TRINITY_DN44787_c0_g1_i1	134	NA	NA	+	TRINITY_DN44787_c0_g1_i1	NA	NA	NA	AA	AA	TT	TT	TT	TT
	UTRINITY_DN17845_c1_g2_i1_139	G/C	TRINITY_DN17845_c1_g2_i1	139	NA	NA	+	TRINITY_DN17845_c1_g2_i1	NA	NA	NA	GG	GG	GG	GG	GC	GC
	UTRINITY_DN17845_c1_g2_i1_163	T/G	TRINITY_DN17845_c1_g2_i1	163	NA	NA	+	TRINITY_DN17845_c1_g2_i1	NA	NA	NA	TT	TT	TT	TT	TG	TG
	UTRINITY_DN17845_c1_g2_i1_266	C/A	TRINITY_DN17845_c1_g2_i1	266	NA	NA	+	TRINITY_DN17845_c1_g2_i1	NA	NA	NA	CC	CC	CC	CC	AA	AA
	UTRINITY_DN17845_c1_g2_i1_272	A/G	TRINITY_DN17845_c1_g2_i1	272	NA	NA	+	TRINITY_DN17845_c1_g2_i1	NA	NA	NA	AA	AA	AA	AA	GG	GG
	UTRINITY_DN17845_c1_g2_i1_283	T/C	TRINITY_DN17845_c1_g2_i1	283	NA	NA	+	TRINITY_DN17845_c1_g2_i1	NA	NA	NA	TT	TT	TT	TT	CT	CT
	UTRINITY_DN17845_c1_g2_i1_358	T/C	TRINITY_DN17845_c1_g2_i1	358	NA	NA	+	TRINITY_DN17845_c1_g2_i1	NA	NA	NA	TT	TT	TT	TT	CT	CT
	UTRINITY_DN17845_c1_g2_i1_463	G/C	TRINITY_DN17845_c1_g2_i1	463	NA	NA	+	TRINITY_DN17845_c1_g2_i1	NA	NA	NA	GG	GG	GG	GG	CC	CC
	UTRINITY_DN784_c3_g1_i1_334	G/A	TRINITY_DN784_c3_g1_i1	334	NA	NA	+	TRINITY_DN784_c3_g1_i1	NA	NA	NA	GG	GG	GG	GG	GA	GA
	UTRINITY_DN3842_c0_g1_i6_72	T/G	TRINITY_DN3842_c0_g1_i6	72	NA	NA	+	TRINITY_DN3842_c0_g1_i6	NA	NA	NA	TT	TT	TT	TT	GG	GG
	UTRINITY_DN3842_c0_g1_i6_89	T/G	TRINITY_DN3842_c0_g1_i6	89	NA	NA	+	TRINITY_DN3842_c0_g1_i6	NA	NA	NA	GG	GG	TT	TT	TT	TT
	UTRINITY_DN18937_c0_g1_i6_710	C/A	TRINITY_DN18937_c0_g1_i6	710	NA	NA	+	TRINITY_DN18937_c0_g1_i6	NA	NA	NA	CC	CC	CC	CC	AA	AA
	UTRINITY_DN18937_c0_g1_i6_711	T/A	TRINITY_DN18937_c0_g1_i6	711	NA	NA	+	TRINITY_DN18937_c0_g1_i6	NA	NA	NA	TT	TT	TT	TT	AA	AA
	UTRINITY_DN14493_c0_g1_i4_348	C/G	TRINITY_DN14493_c0_g1_i4	348	NA	NA	+	TRINITY_DN14493_c0_g1_i4	NA	NA	NA	GG	GG	CC	CC	CC	CC
	UTRINITY_DN1914_c0_g1_i8_482	A/G	TRINITY_DN1914_c0_g1_i8	482	NA	NA	+	TRINITY_DN1914_c0_g1_i8	NA	NA	NA	GG	GG	AA	AA	AA	AA
	UTRINITY_DN1914_c0_g1_i8_501	A/C	TRINITY_DN1914_c0_g1_i8	501	NA	NA	+	TRINITY_DN1914_c0_g1_i8	NA	NA	NA	CC	CC	AA	AA	AA	AA
	UTRINITY_DN4733_c0_g1_i10_115	C/G	TRINITY_DN4733_c0_g1_i10	115	NA	NA	+	TRINITY_DN4733_c0_g1_i10	NA	NA	NA	GG	GG	CC	CC	CC	CC
	UTRINITY_DN545_c0_g1_i10_253	T/G	TRINITY_DN545_c0_g1_i10	253	NA	NA	+	TRINITY_DN545_c0_g1_i10	NA	NA	NA	TT	TT	TT	TT	TG	TG
	UTRINITY_DN4806_c0_g1_i2_4696	G/T	TRINITY_DN4806_c0_g1_i2	4696	NA	NA	+	TRINITY_DN4806_c0_g1_i2	NA	NA	NA	GG	GG	GG	GG	TT	TT
	UTRINITY_DN4806_c0_g1_i2_4921	C/T	TRINITY_DN4806_c0_g1_i2	4921	NA	NA	+	TRINITY_DN4806_c0_g1_i2	NA	NA	NA	TT	TT	CC	CC	CC	CC
	UTRINITY_DN16658_c0_g1_i2_307	C/A	TRINITY_DN16658_c0_g1_i2	307	NA	NA	+	TRINITY_DN16658_c0_g1_i2	NA	NA	NA	AA	AA	CC	CC	CC	CC
	UTRINITY_DN16658_c0_g1_i2_308	A/C	TRINITY_DN16658_c0_g1_i2	308	NA	NA	+	TRINITY_DN16658_c0_g1_i2	NA	NA	NA	CC	CC	AA	AA	AA	AA
	UTRINITY_DN9559_c0_g1_i17_574	G/T	TRINITY_DN9559_c0_g1_i17	574	NA	NA	+	TRINITY_DN9559_c0_g1_i17	NA	NA	NA	TG	TG	TG	TG	GG	GG
	UTRINITY_DN9559_c0_g1_i17_578	C/T	TRINITY_DN9559_c0_g1_i17	578	NA	NA	+	TRINITY_DN9559_c0_g1_i17	NA	NA	NA	TC	TC	TC	TC	CC	CC
	UTRINITY_DN9559_c0_g1_i17_597	T/G	TRINITY_DN9559_c0_g1_i17	597	NA	NA	+	TRINITY_DN9559_c0_g1_i17	NA	NA	NA	GT	GT	GT	GT	TT	TT
	UTRINITY_DN9559_c0_g1_i17_637	T/C	TRINITY_DN9559_c0_g1_i17	637	NA	NA	+	TRINITY_DN9559_c0_g1_i17	NA	NA	NA	TC	TC	TC	TC	TT	TT
	UTRINITY_DN4748_c0_g1_i4_1310	C/T	TRINITY_DN4748_c0_g1_i4	1310	NA	NA	+	TRINITY_DN4748_c0_g1_i4	NA	NA	NA	CC	CC	CC	CC	TT	TT
	UTRINITY_DN4748_c0_g1_i4_1490	G/A	TRINITY_DN4748_c0_g1_i4	1490	NA	NA	+	TRINITY_DN4748_c0_g1_i4	NA	NA	NA	GG	GG	GG	GG	AA	AA
	UTRINITY_DN657_c0_g1_i9_1396	T/A	TRINITY_DN657_c0_g1_i9	1396	NA	NA	+	TRINITY_DN657_c0_g1_i9	NA	NA	NA	TT	TT	TT	TT	AA	AA
	UTRINITY_DN657_c0_g1_i9_1447	C/A	TRINITY_DN657_c0_g1_i9	1447	NA	NA	+	TRINITY_DN657_c0_g1_i9	NA	NA	NA	CC	CC	CC	CC	AA	AA
	UTRINITY_DN24365_c0_g1_i1_188	T/C	TRINITY_DN24365_c0_g1_i1	188	NA	NA	+	TRINITY_DN24365_c0_g1_i1	NA	NA	NA	TT	TT	TC	TC	TC	TC
	UTRINITY_DN24365_c0_g1_i1_214	G/A	TRINITY_DN24365_c0_g1_i1	214	NA	NA	+	TRINITY_DN24365_c0_g1_i1	NA	NA	NA	GA	GA	GG	GG	GA	GA
	UTRINITY_DN24365_c0_g1_i1_274	T/C	TRINITY_DN24365_c0_g1_i1	274	NA	NA	+	TRINITY_DN24365_c0_g1_i1	NA	NA	NA	TT	TT	TT	TT	TC	TC
	UTRINITY_DN14569_c0_g2_i2_923	C/T	TRINITY_DN14569_c0_g2_i2	923	NA	NA	+	TRINITY_DN14569_c0_g2_i2	NA	NA	NA	CT	CT	CT	CT	CC	CC
	UTRINITY_DN44411_c0_g1_i1_281	T/C	TRINITY_DN44411_c0_g1_i1	281	NA	NA	+	TRINITY_DN44411_c0_g1_i1	NA	NA	NA	CC	CC	CT	CT	TT	TT
	UTRINITY_DN15857_c0_g1_i2_149	G/A	TRINITY_DN15857_c0_g1_i2	149	NA	NA	+	TRINITY_DN15857_c0_g1_i2	NA	NA	NA	GG	GG	GG	GG	AA	AA
	UTRINITY_DN15857_c0_g1_i2_172	C/T	TRINITY_DN15857_c0_g1_i2	172	NA	NA	+	TRINITY_DN15857_c0_g1_i2	NA	NA	NA	CC	CC	CC	CC	TT	TT
	UTRINITY_DN15857_c0_g1_i2_177	T/C	TRINITY_DN15857_c0_g1_i2	177	NA	NA	+	TRINITY_DN15857_c0_g1_i2	NA	NA	NA	TT	TT	TT	TT	CC	CC
	UTRINITY_DN15857_c0_g1_i2_181	T/A	TRINITY_DN15857_c0_g1_i2	181	NA	NA	+	TRINITY_DN15857_c0_g1_i2	NA	NA	NA	TT	TT	TT	TT	AA	AA
	UTRINITY_DN9386_c0_g1_i1_3162	T/C	TRINITY_DN9386_c0_g1_i1	3162	NA	NA	+	TRINITY_DN9386_c0_g1_i1	NA	NA	NA	TT	TT	TT	TT	CC	CC
	UTRINITY_DN9386_c0_g1_i1_3179	C/T	TRINITY_DN9386_c0_g1_i1	3179	NA	NA	+	TRINITY_DN9386_c0_g1_i1	NA	NA	NA	CC	CC	CC	CC	TT	TT
	UTRINITY_DN75374_c0_g1_i1_152	C/T	TRINITY_DN75374_c0_g1_i1	152	NA	NA	+	TRINITY_DN75374_c0_g1_i1	NA	NA	NA	CC	CC	CC	CC	TT	TT
	UTRINITY_DN338_c0_g1_i10_126	C/G	TRINITY_DN338_c0_g1_i10	126	NA	NA	+	TRINITY_DN338_c0_g1_i10	NA	NA	NA	GG	GG	CC	CC	CC	CC
	UTRINITY_DN338_c0_g1_i10_127	G/C	TRINITY_DN338_c0_g1_i10	127	NA	NA	+	TRINITY_DN338_c0_g1_i10	NA	NA	NA	CC	CC	GG	GG	GG	GG
	UTRINITY_DN338_c0_g1_i10_128	T/A	TRINITY_DN338_c0_g1_i10	128	NA	NA	+	TRINITY_DN338_c0_g1_i10	NA	NA	NA	AA	AA	TT	TT	TT	TT
	UTRINITY_DN55922_c0_g1_i1_65	G/T	TRINITY_DN55922_c0_g1_i1	65	NA	NA	+	TRINITY_DN55922_c0_g1_i1	NA	NA	NA	GG	GG	GG	GG	TT	TT
	UTRINITY_DN55922_c0_g1_i1_102	A/G	TRINITY_DN55922_c0_g1_i1	102	NA	NA	+	TRINITY_DN55922_c0_g1_i1	NA	NA	NA	AA	AA	AA	AA	GG	GG
	UTRINITY_DN47_c0_g1_i2_438	A/G	TRINITY_DN47_c0_g1_i2	438	NA	NA	+	TRINITY_DN47_c0_g1_i2	NA	NA	NA	AA	AA	AA	AA	GG	GG
	UTRINITY_DN17120_c0_g1_i2_232	C/T	TRINITY_DN17120_c0_g1_i2	232	NA	NA	+	TRINITY_DN17120_c0_g1_i2	NA	NA	NA	CC	CC	CC	CC	CT	CT
	UTRINITY_DN15392_c0_g1_i1_148	C/T	TRINITY_DN15392_c0_g1_i1	148	NA	NA	+	TRINITY_DN15392_c0_g1_i1	NA	NA	NA	CT	CT	CT	CT	CC	CC
	UTRINITY_DN15392_c0_g1_i1_157	G/C	TRINITY_DN15392_c0_g1_i1	157	NA	NA	+	TRINITY_DN15392_c0_g1_i1	NA	NA	NA	GC	GC	GC	GC	GG	GG
	UTRINITY_DN15392_c0_g1_i1_179	G/C	TRINITY_DN15392_c0_g1_i1	179	NA	NA	+	TRINITY_DN15392_c0_g1_i1	NA	NA	NA	GC	GC	GC	GC	GG	GG
	UTRINITY_DN15392_c0_g1_i1_181	A/G	TRINITY_DN15392_c0_g1_i1	181	NA	NA	+	TRINITY_DN15392_c0_g1_i1	NA	NA	NA	AG	AG	AG	AG	AA	AA
	UTRINITY_DN15392_c0_g1_i1_216	G/A	TRINITY_DN15392_c0_g1_i1	216	NA	NA	+	TRINITY_DN15392_c0_g1_i1	NA	NA	NA	GA	GA	GA	GA	GG	GG
	UTRINITY_DN15392_c0_g1_i1_508	A/G	TRINITY_DN15392_c0_g1_i1	508	NA	NA	+	TRINITY_DN15392_c0_g1_i1	NA	NA	NA	AG	AG	AG	AG	AA	AA
	UTRINITY_DN15392_c0_g1_i1_525	T/C	TRINITY_DN15392_c0_g1_i1	525	NA	NA	+	TRINITY_DN15392_c0_g1_i1	NA	NA	NA	TC	TC	TC	TC	TT	TT
	UTRINITY_DN5988_c0_g2_i1_196	C/T	TRINITY_DN5988_c0_g2_i1	196	NA	NA	+	TRINITY_DN5988_c0_g2_i1	NA	NA	NA	CC	CC	CT	CT	CC	CC
	UTRINITY_DN5988_c0_g2_i1_257	T/C	TRINITY_DN5988_c0_g2_i1	257	NA	NA	+	TRINITY_DN5988_c0_g2_i1	NA	NA	NA	TT	TT	TC	TC	TT	TT
	UTRINITY_DN466_c0_g1_i8_1657	G/A	TRINITY_DN466_c0_g1_i8	1657	NA	NA	+	TRINITY_DN466_c0_g1_i8	NA	NA	NA	GG	GG	GG	GG	AA	AA
	UTRINITY_DN466_c0_g1_i8_1660	G/C	TRINITY_DN466_c0_g1_i8	1660	NA	NA	+	TRINITY_DN466_c0_g1_i8	NA	NA	NA	GG	GG	GG	GG	CC	CC
	UTRINITY_DN466_c0_g1_i8_1669	C/G	TRINITY_DN466_c0_g1_i8	1669	NA	NA	+	TRINITY_DN466_c0_g1_i8	NA	NA	NA	CC	CC	CC	CC	GG	GG
	UTRINITY_DN22766_c0_g1_i4_1445	G/A	TRINITY_DN22766_c0_g1_i4	1445	NA	NA	+	TRINITY_DN22766_c0_g1_i4	NA	NA	NA	GG	GG	GA	GA	GG	GG
	UTRINITY_DN22766_c0_g1_i4_1520	G/C	TRINITY_DN22766_c0_g1_i4	1520	NA	NA	+	TRINITY_DN22766_c0_g1_i4	NA	NA	NA	GG	GG	GC	GC	GG	GG
	UTRINITY_DN22766_c0_g1_i4_1535	G/C	TRINITY_DN22766_c0_g1_i4	1535	NA	NA	+	TRINITY_DN22766_c0_g1_i4	NA	NA	NA	GG	GG	GC	GC	GG	GG
	UTRINITY_DN22766_c0_g1_i4_1541	T/C	TRINITY_DN22766_c0_g1_i4	1541	NA	NA	+	TRINITY_DN22766_c0_g1_i4	NA	NA	NA	TT	TT	TC	TC	TT	TT
	UTRINITY_DN14016_c0_g2_i1_647	C/A	TRINITY_DN14016_c0_g2_i1	647	NA	NA	+	TRINITY_DN14016_c0_g2_i1	NA	NA	NA	CC	CC	CA	CA	CC	CC
	UTRINITY_DN14016_c0_g2_i1_652	A/G	TRINITY_DN14016_c0_g2_i1	652	NA	NA	+	TRINITY_DN14016_c0_g2_i1	NA	NA	NA	AA	AA	AG	AG	AA	AA
	UTRINITY_DN14016_c0_g2_i1_668	A/G	TRINITY_DN14016_c0_g2_i1	668	NA	NA	+	TRINITY_DN14016_c0_g2_i1	NA	NA	NA	AA	AA	AG	AG	AG	AG
	UTRINITY_DN14016_c0_g2_i1_1406	A/T	TRINITY_DN14016_c0_g2_i1	1406	NA	NA	+	TRINITY_DN14016_c0_g2_i1	NA	NA	NA	AA	AA	AT	AT	AT	AT
	UTRINITY_DN14016_c0_g2_i1_1442	G/A	TRINITY_DN14016_c0_g2_i1	1442	NA	NA	+	TRINITY_DN14016_c0_g2_i1	NA	NA	NA	GG	GG	GA	GA	GG	GG
	UTRINITY_DN3289_c0_g1_i6_258	C/G	TRINITY_DN3289_c0_g1_i6	258	NA	NA	+	TRINITY_DN3289_c0_g1_i6	NA	NA	NA	CC	CC	CC	CC	CG	CG
	UTRINITY_DN1091_c0_g1_i3_201	C/G	TRINITY_DN1091_c0_g1_i3	201	NA	NA	+	TRINITY_DN1091_c0_g1_i3	NA	NA	NA	CC	CC	CC	CC	GG	GG
	UTRINITY_DN225_c0_g1_i4_1623	T/C	TRINITY_DN225_c0_g1_i4	1623	NA	NA	+	TRINITY_DN225_c0_g1_i4	NA	NA	NA	TT	TT	TT	TT	CC	CC
	UTRINITY_DN225_c0_g1_i4_1711	A/C	TRINITY_DN225_c0_g1_i4	1711	NA	NA	+	TRINITY_DN225_c0_g1_i4	NA	NA	NA	AA	AA	AA	AA	CC	CC
	UTRINITY_DN225_c0_g1_i4_1712	A/C	TRINITY_DN225_c0_g1_i4	1712	NA	NA	+	TRINITY_DN225_c0_g1_i4	NA	NA	NA	AA	AA	AA	AA	CC	CC
	UTRINITY_DN225_c0_g1_i4_1744	C/A	TRINITY_DN225_c0_g1_i4	1744	NA	NA	+	TRINITY_DN225_c0_g1_i4	NA	NA	NA	CC	CC	CC	CC	AA	AA
	UTRINITY_DN225_c0_g1_i4_1767	T/C	TRINITY_DN225_c0_g1_i4	1767	NA	NA	+	TRINITY_DN225_c0_g1_i4	NA	NA	NA	TT	TT	TT	TT	CC	CC
	UTRINITY_DN225_c0_g1_i4_1788	C/T	TRINITY_DN225_c0_g1_i4	1788	NA	NA	+	TRINITY_DN225_c0_g1_i4	NA	NA	NA	CC	CC	CC	CC	TT	TT
	UTRINITY_DN225_c0_g1_i4_1791	G/A	TRINITY_DN225_c0_g1_i4	1791	NA	NA	+	TRINITY_DN225_c0_g1_i4	NA	NA	NA	GG	GG	GG	GG	AA	AA
	UTRINITY_DN225_c0_g1_i4_1979	A/T	TRINITY_DN225_c0_g1_i4	1979	NA	NA	+	TRINITY_DN225_c0_g1_i4	NA	NA	NA	AA	AA	AA	AA	TT	TT
	UTRINITY_DN225_c0_g1_i4_2025	C/G	TRINITY_DN225_c0_g1_i4	2025	NA	NA	+	TRINITY_DN225_c0_g1_i4	NA	NA	NA	CC	CC	CC	CC	GG	GG
	UTRINITY_DN225_c0_g1_i4_2030	G/A	TRINITY_DN225_c0_g1_i4	2030	NA	NA	+	TRINITY_DN225_c0_g1_i4	NA	NA	NA	GG	GG	GG	GG	AA	AA
	UTRINITY_DN225_c0_g1_i4_2057	T/G	TRINITY_DN225_c0_g1_i4	2057	NA	NA	+	TRINITY_DN225_c0_g1_i4	NA	NA	NA	TT	TT	TT	TT	GG	GG
	UTRINITY_DN225_c0_g1_i4_2071	C/T	TRINITY_DN225_c0_g1_i4	2071	NA	NA	+	TRINITY_DN225_c0_g1_i4	NA	NA	NA	CC	CC	CC	CC	TT	TT
	UTRINITY_DN2496_c0_g1_i6_2870	A/G	TRINITY_DN2496_c0_g1_i6	2870	NA	NA	+	TRINITY_DN2496_c0_g1_i6	NA	NA	NA	AA	AA	AA	AA	GG	GG
	UTRINITY_DN2822_c0_g2_i1_32	A/T	TRINITY_DN2822_c0_g2_i1	32	NA	NA	+	TRINITY_DN2822_c0_g2_i1	NA	NA	NA	AT	AT	AA	AA	AA	AA
	UTRINITY_DN2822_c0_g2_i1_95	C/A	TRINITY_DN2822_c0_g2_i1	95	NA	NA	+	TRINITY_DN2822_c0_g2_i1	NA	NA	NA	AC	AC	AC	AC	CC	CC
	UTRINITY_DN2822_c0_g2_i1_124	T/C	TRINITY_DN2822_c0_g2_i1	124	NA	NA	+	TRINITY_DN2822_c0_g2_i1	NA	NA	NA	TC	TC	TC	TC	TT	TT
	UTRINITY_DN2822_c0_g2_i1_148	C/A	TRINITY_DN2822_c0_g2_i1	148	NA	NA	+	TRINITY_DN2822_c0_g2_i1	NA	NA	NA	CC	CC	CC	CC	CA	CA
	UTRINITY_DN2822_c0_g2_i1_391	C/T	TRINITY_DN2822_c0_g2_i1	391	NA	NA	+	TRINITY_DN2822_c0_g2_i1	NA	NA	NA	CC	CC	CC	CC	CT	CT
	UTRINITY_DN24914_c0_g1_i1_1522	C/G	TRINITY_DN24914_c0_g1_i1	1522	NA	NA	+	TRINITY_DN24914_c0_g1_i1	NA	NA	NA	--	--	GG	GG	CC	CC
	UTRINITY_DN11870_c0_g1_i1_106	T/C	TRINITY_DN11870_c0_g1_i1	106	NA	NA	+	TRINITY_DN11870_c0_g1_i1	NA	NA	NA	TT	TT	CC	CC	TT	TT
	UTRINITY_DN25042_c0_g1_i2_180	T/C	TRINITY_DN25042_c0_g1_i2	180	NA	NA	+	TRINITY_DN25042_c0_g1_i2	NA	NA	NA	TT	TT	TT	TT	CC	CC
	UTRINITY_DN25042_c0_g1_i2_186	C/T	TRINITY_DN25042_c0_g1_i2	186	NA	NA	+	TRINITY_DN25042_c0_g1_i2	NA	NA	NA	CC	CC	CC	CC	TT	TT
	UTRINITY_DN7029_c0_g1_i4_362	A/G	TRINITY_DN7029_c0_g1_i4	362	NA	NA	+	TRINITY_DN7029_c0_g1_i4	NA	NA	NA	AA	AA	AA	AA	GG	GG
	UTRINITY_DN6505_c0_g1_i3_1063	G/A	TRINITY_DN6505_c0_g1_i3	1063	NA	NA	+	TRINITY_DN6505_c0_g1_i3	NA	NA	NA	GG	GG	GA	GA	GG	GG
	UTRINITY_DN2535_c1_g1_i2_334	C/T	TRINITY_DN2535_c1_g1_i2	334	NA	NA	+	TRINITY_DN2535_c1_g1_i2	NA	NA	NA	CC	CC	CC	CC	TT	TT
	UTRINITY_DN3916_c0_g1_i4_725	T/G	TRINITY_DN3916_c0_g1_i4	725	NA	NA	+	TRINITY_DN3916_c0_g1_i4	NA	NA	NA	TT	TT	GG	GG	TT	TT
	UTRINITY_DN2813_c1_g1_i3_1150	T/C	TRINITY_DN2813_c1_g1_i3	1150	NA	NA	+	TRINITY_DN2813_c1_g1_i3	NA	NA	NA	TT	TT	TT	TT	CC	CC
	UTRINITY_DN1981_c1_g2_i3_244	C/G	TRINITY_DN1981_c1_g2_i3	244	NA	NA	+	TRINITY_DN1981_c1_g2_i3	NA	NA	NA	--	--	CC	CC	GG	GG
	UTRINITY_DN28803_c0_g2_i1_82	C/G	TRINITY_DN28803_c0_g2_i1	82	NA	NA	+	TRINITY_DN28803_c0_g2_i1	NA	NA	NA	CG	CG	CC	CC	CC	CC
	UTRINITY_DN28803_c0_g2_i1_106	A/T	TRINITY_DN28803_c0_g2_i1	106	NA	NA	+	TRINITY_DN28803_c0_g2_i1	NA	NA	NA	AT	AT	AA	AA	AA	AA
	UTRINITY_DN28803_c0_g2_i1_107	T/G	TRINITY_DN28803_c0_g2_i1	107	NA	NA	+	TRINITY_DN28803_c0_g2_i1	NA	NA	NA	TG	TG	TT	TT	TT	TT
	UTRINITY_DN28803_c0_g2_i1_123	T/C	TRINITY_DN28803_c0_g2_i1	123	NA	NA	+	TRINITY_DN28803_c0_g2_i1	NA	NA	NA	TC	TC	TT	TT	TT	TT
	UTRINITY_DN8801_c0_g1_i5_496	T/A	TRINITY_DN8801_c0_g1_i5	496	NA	NA	+	TRINITY_DN8801_c0_g1_i5	NA	NA	NA	TT	TT	TA	TA	TT	TT
	UTRINITY_DN103391_c0_g1_i2_48	T/C	TRINITY_DN103391_c0_g1_i2	48	NA	NA	+	TRINITY_DN103391_c0_g1_i2	NA	NA	NA	TT	TT	--	--	CC	CC
	UTRINITY_DN14002_c0_g4_i1_255	C/T	TRINITY_DN14002_c0_g4_i1	255	NA	NA	+	TRINITY_DN14002_c0_g4_i1	NA	NA	NA	CC	CC	CC	CC	TT	TT
	UTRINITY_DN11212_c0_g1_i2_734	G/T	TRINITY_DN11212_c0_g1_i2	734	NA	NA	+	TRINITY_DN11212_c0_g1_i2	NA	NA	NA	GG	GG	GG	GG	GT	GT
	UTRINITY_DN1387_c0_g1_i11_451	G/A	TRINITY_DN1387_c0_g1_i11	451	NA	NA	+	TRINITY_DN1387_c0_g1_i11	NA	NA	NA	GG	GG	GG	GG	AA	AA
	UTRINITY_DN7879_c0_g1_i4_341	G/A	TRINITY_DN7879_c0_g1_i4	341	NA	NA	+	TRINITY_DN7879_c0_g1_i4	NA	NA	NA	GG	GG	GG	GG	GA	GA
	UTRINITY_DN6800_c0_g1_i2_379	G/A	TRINITY_DN6800_c0_g1_i2	379	NA	NA	+	TRINITY_DN6800_c0_g1_i2	NA	NA	NA	GG	GG	GG	GG	AA	AA
	UTRINITY_DN31460_c0_g1_i3_928	C/G	TRINITY_DN31460_c0_g1_i3	928	NA	NA	+	TRINITY_DN31460_c0_g1_i3	NA	NA	NA	CC	CC	CC	CC	GG	GG
	UTRINITY_DN31460_c0_g1_i3_931	C/G	TRINITY_DN31460_c0_g1_i3	931	NA	NA	+	TRINITY_DN31460_c0_g1_i3	NA	NA	NA	CC	CC	CC	CC	GG	GG
	UTRINITY_DN39435_c0_g1_i6_357	G/T	TRINITY_DN39435_c0_g1_i6	357	NA	NA	+	TRINITY_DN39435_c0_g1_i6	NA	NA	NA	GG	GG	TT	TT	GG	GG
	UTRINITY_DN7129_c0_g1_i3_5644	A/G	TRINITY_DN7129_c0_g1_i3	5644	NA	NA	+	TRINITY_DN7129_c0_g1_i3	NA	NA	NA	AA	AA	AA	AA	AG	AG
	UTRINITY_DN7129_c0_g1_i3_5649	A/C	TRINITY_DN7129_c0_g1_i3	5649	NA	NA	+	TRINITY_DN7129_c0_g1_i3	NA	NA	NA	AA	AA	AA	AA	AC	AC
	UTRINITY_DN7129_c0_g1_i3_5650	G/C	TRINITY_DN7129_c0_g1_i3	5650	NA	NA	+	TRINITY_DN7129_c0_g1_i3	NA	NA	NA	GG	GG	GG	GG	GC	GC
	UTRINITY_DN7129_c0_g1_i3_5664	T/A	TRINITY_DN7129_c0_g1_i3	5664	NA	NA	+	TRINITY_DN7129_c0_g1_i3	NA	NA	NA	TT	TT	TT	TT	TA	TA
	UTRINITY_DN7129_c0_g1_i3_5674	A/C	TRINITY_DN7129_c0_g1_i3	5674	NA	NA	+	TRINITY_DN7129_c0_g1_i3	NA	NA	NA	AA	AA	AA	AA	AC	AC
	UTRINITY_DN7129_c0_g1_i3_5773	G/T	TRINITY_DN7129_c0_g1_i3	5773	NA	NA	+	TRINITY_DN7129_c0_g1_i3	NA	NA	NA	GG	GG	GG	GG	TT	TT
	UTRINITY_DN49770_c0_g1_i9_139	T/C	TRINITY_DN49770_c0_g1_i9	139	NA	NA	+	TRINITY_DN49770_c0_g1_i9	NA	NA	NA	TT	TT	TT	TT	CC	CC
	UTRINITY_DN49770_c0_g1_i9_239	A/G	TRINITY_DN49770_c0_g1_i9	239	NA	NA	+	TRINITY_DN49770_c0_g1_i9	NA	NA	NA	AA	AA	AA	AA	GG	GG
	UTRINITY_DN8098_c0_g1_i2_1131	A/G	TRINITY_DN8098_c0_g1_i2	1131	NA	NA	+	TRINITY_DN8098_c0_g1_i2	NA	NA	NA	AA	AA	AA	AA	AG	AG
	UTRINITY_DN21647_c0_g1_i4_202	G/C	TRINITY_DN21647_c0_g1_i4	202	NA	NA	+	TRINITY_DN21647_c0_g1_i4	NA	NA	NA	GG	GG	GG	GG	CC	CC
	UTRINITY_DN21647_c0_g1_i4_220	G/C	TRINITY_DN21647_c0_g1_i4	220	NA	NA	+	TRINITY_DN21647_c0_g1_i4	NA	NA	NA	GG	GG	GG	GG	CC	CC
	UTRINITY_DN2156_c0_g1_i10_1309	C/T	TRINITY_DN2156_c0_g1_i10	1309	NA	NA	+	TRINITY_DN2156_c0_g1_i10	NA	NA	NA	CC	CC	CC	CC	TT	TT
	UTRINITY_DN12903_c0_g1_i6_814	C/T	TRINITY_DN12903_c0_g1_i6	814	NA	NA	+	TRINITY_DN12903_c0_g1_i6	NA	NA	NA	TT	TT	CC	CC	CC	CC
	UTRINITY_DN17576_c0_g1_i1_166	T/G	TRINITY_DN17576_c0_g1_i1	166	NA	NA	+	TRINITY_DN17576_c0_g1_i1	NA	NA	NA	TT	TT	TT	TT	TG	TG
	UTRINITY_DN2303_c0_g1_i4_1431	C/T	TRINITY_DN2303_c0_g1_i4	1431	NA	NA	+	TRINITY_DN2303_c0_g1_i4	NA	NA	NA	CC	CC	CC	CC	CT	CT
	UTRINITY_DN2303_c0_g1_i4_1461	C/A	TRINITY_DN2303_c0_g1_i4	1461	NA	NA	+	TRINITY_DN2303_c0_g1_i4	NA	NA	NA	CC	CC	CC	CC	CA	CA
	UTRINITY_DN2303_c0_g1_i4_1495	T/C	TRINITY_DN2303_c0_g1_i4	1495	NA	NA	+	TRINITY_DN2303_c0_g1_i4	NA	NA	NA	TT	TT	TT	TT	TC	TC
	UTRINITY_DN2303_c0_g1_i4_1524	C/T	TRINITY_DN2303_c0_g1_i4	1524	NA	NA	+	TRINITY_DN2303_c0_g1_i4	NA	NA	NA	CT	CT	CC	CC	CT	CT
	UTRINITY_DN2303_c0_g1_i4_1525	C/G	TRINITY_DN2303_c0_g1_i4	1525	NA	NA	+	TRINITY_DN2303_c0_g1_i4	NA	NA	NA	CG	CG	CC	CC	CC	CC
	UTRINITY_DN2303_c0_g1_i4_1529	A/T	TRINITY_DN2303_c0_g1_i4	1529	NA	NA	+	TRINITY_DN2303_c0_g1_i4	NA	NA	NA	AA	AA	AA	AA	AT	AT
	UTRINITY_DN2303_c0_g1_i4_1534	T/G	TRINITY_DN2303_c0_g1_i4	1534	NA	NA	+	TRINITY_DN2303_c0_g1_i4	NA	NA	NA	TG	TG	TT	TT	TT	TT
	UTRINITY_DN5571_c0_g3_i1_114	C/T	TRINITY_DN5571_c0_g3_i1	114	NA	NA	+	TRINITY_DN5571_c0_g3_i1	NA	NA	NA	CC	CC	CC	CC	CT	CT
	UTRINITY_DN5571_c0_g3_i1_127	G/A	TRINITY_DN5571_c0_g3_i1	127	NA	NA	+	TRINITY_DN5571_c0_g3_i1	NA	NA	NA	GG	GG	GG	GG	GA	GA
	UTRINITY_DN5571_c0_g3_i1_140	A/K	TRINITY_DN5571_c0_g3_i1	140	NA	NA	+	TRINITY_DN5571_c0_g3_i1	NA	NA	NA	TA	TA	TA	TA	AG	AG
	UTRINITY_DN5571_c0_g3_i1_149	G/C	TRINITY_DN5571_c0_g3_i1	149	NA	NA	+	TRINITY_DN5571_c0_g3_i1	NA	NA	NA	GG	GG	GG	GG	GC	GC
	UTRINITY_DN5571_c0_g3_i1_157	T/C	TRINITY_DN5571_c0_g3_i1	157	NA	NA	+	TRINITY_DN5571_c0_g3_i1	NA	NA	NA	CC	CC	CT	CT	TT	TT
	UTRINITY_DN8270_c0_g2_i1_702	T/A	TRINITY_DN8270_c0_g2_i1	702	NA	NA	+	TRINITY_DN8270_c0_g2_i1	NA	NA	NA	TT	TT	TA	TA	TT	TT
	UTRINITY_DN5763_c0_g1_i1_1412	G/A	TRINITY_DN5763_c0_g1_i1	1412	NA	NA	+	TRINITY_DN5763_c0_g1_i1	NA	NA	NA	AA	AA	GG	GG	GG	GG
	UTRINITY_DN3599_c0_g1_i7_536	A/G	TRINITY_DN3599_c0_g1_i7	536	NA	NA	+	TRINITY_DN3599_c0_g1_i7	NA	NA	NA	AA	AA	AA	AA	GG	GG
	UTRINITY_DN3599_c0_g1_i7_538	T/G	TRINITY_DN3599_c0_g1_i7	538	NA	NA	+	TRINITY_DN3599_c0_g1_i7	NA	NA	NA	TT	TT	TT	TT	GG	GG
	UTRINITY_DN184_c0_g2_i1_203	T/A	TRINITY_DN184_c0_g2_i1	203	NA	NA	+	TRINITY_DN184_c0_g2_i1	NA	NA	NA	TT	TT	TT	TT	AA	AA
	UTRINITY_DN184_c0_g2_i1_395	C/A	TRINITY_DN184_c0_g2_i1	395	NA	NA	+	TRINITY_DN184_c0_g2_i1	NA	NA	NA	CC	CC	CC	CC	CA	CA
	UTRINITY_DN184_c0_g2_i1_580	T/C	TRINITY_DN184_c0_g2_i1	580	NA	NA	+	TRINITY_DN184_c0_g2_i1	NA	NA	NA	TT	TT	TT	TT	TC	TC
	UTRINITY_DN184_c0_g2_i1_617	C/T	TRINITY_DN184_c0_g2_i1	617	NA	NA	+	TRINITY_DN184_c0_g2_i1	NA	NA	NA	CT	CT	CC	CC	CT	CT
	UTRINITY_DN184_c0_g2_i1_620	C/T	TRINITY_DN184_c0_g2_i1	620	NA	NA	+	TRINITY_DN184_c0_g2_i1	NA	NA	NA	CT	CT	CC	CC	CC	CC
	UTRINITY_DN99057_c0_g1_i1_74	G/A	TRINITY_DN99057_c0_g1_i1	74	NA	NA	+	TRINITY_DN99057_c0_g1_i1	NA	NA	NA	AG	AG	AG	AG	GG	GG
	UTRINITY_DN99057_c0_g1_i1_105	A/C	TRINITY_DN99057_c0_g1_i1	105	NA	NA	+	TRINITY_DN99057_c0_g1_i1	NA	NA	NA	CA	CA	CA	CA	AA	AA
	UTRINITY_DN99057_c0_g1_i1_131	G/A	TRINITY_DN99057_c0_g1_i1	131	NA	NA	+	TRINITY_DN99057_c0_g1_i1	NA	NA	NA	GA	GA	GA	GA	GG	GG
	UTRINITY_DN99057_c0_g1_i1_153	T/C	TRINITY_DN99057_c0_g1_i1	153	NA	NA	+	TRINITY_DN99057_c0_g1_i1	NA	NA	NA	TC	TC	TC	TC	TT	TT
	UTRINITY_DN99057_c0_g1_i1_186	C/T	TRINITY_DN99057_c0_g1_i1	186	NA	NA	+	TRINITY_DN99057_c0_g1_i1	NA	NA	NA	CT	CT	CT	CT	CC	CC
	UTRINITY_DN99057_c0_g1_i1_188	A/G	TRINITY_DN99057_c0_g1_i1	188	NA	NA	+	TRINITY_DN99057_c0_g1_i1	NA	NA	NA	AG	AG	AG	AG	AA	AA
	UTRINITY_DN1826_c1_g1_i9_759	T/C	TRINITY_DN1826_c1_g1_i9	759	NA	NA	+	TRINITY_DN1826_c1_g1_i9	NA	NA	NA	TT	TT	CC	CC	TT	TT
	UTRINITY_DN24953_c0_g1_i7_49	G/A	TRINITY_DN24953_c0_g1_i7	49	NA	NA	+	TRINITY_DN24953_c0_g1_i7	NA	NA	NA	GG	GG	GG	GG	AA	AA
	UTRINITY_DN24953_c0_g1_i7_198	A/G	TRINITY_DN24953_c0_g1_i7	198	NA	NA	+	TRINITY_DN24953_c0_g1_i7	NA	NA	NA	AA	AA	AA	AA	GG	GG
	UTRINITY_DN24953_c0_g1_i7_237	G/A	TRINITY_DN24953_c0_g1_i7	237	NA	NA	+	TRINITY_DN24953_c0_g1_i7	NA	NA	NA	GG	GG	GG	GG	AA	AA
	UTRINITY_DN24953_c0_g1_i7_268	C/T	TRINITY_DN24953_c0_g1_i7	268	NA	NA	+	TRINITY_DN24953_c0_g1_i7	NA	NA	NA	CC	CC	CC	CC	TT	TT
	UTRINITY_DN22443_c0_g3_i1_293	C/T	TRINITY_DN22443_c0_g3_i1	293	NA	NA	+	TRINITY_DN22443_c0_g3_i1	NA	NA	NA	TT	TT	CC	CC	CC	CC
	UTRINITY_DN22443_c0_g3_i1_316	A/G	TRINITY_DN22443_c0_g3_i1	316	NA	NA	+	TRINITY_DN22443_c0_g3_i1	NA	NA	NA	GG	GG	AA	AA	AA	AA
	UTRINITY_DN1924_c0_g1_i3_22	T/C	TRINITY_DN1924_c0_g1_i3	22	NA	NA	+	TRINITY_DN1924_c0_g1_i3	NA	NA	NA	TT	TT	TT	TT	CC	CC
	UTRINITY_DN1924_c0_g1_i3_27	G/A	TRINITY_DN1924_c0_g1_i3	27	NA	NA	+	TRINITY_DN1924_c0_g1_i3	NA	NA	NA	GG	GG	GG	GG	AA	AA
	UTRINITY_DN1924_c0_g1_i3_244	C/T	TRINITY_DN1924_c0_g1_i3	244	NA	NA	+	TRINITY_DN1924_c0_g1_i3	NA	NA	NA	CC	CC	CC	CC	TT	TT
	UTRINITY_DN1924_c0_g1_i3_541	T/C	TRINITY_DN1924_c0_g1_i3	541	NA	NA	+	TRINITY_DN1924_c0_g1_i3	NA	NA	NA	TT	TT	TT	TT	CC	CC
	UTRINITY_DN4812_c0_g1_i9_1328	G/C	TRINITY_DN4812_c0_g1_i9	1328	NA	NA	+	TRINITY_DN4812_c0_g1_i9	NA	NA	NA	GG	GG	GG	GG	CC	CC
	UTRINITY_DN87402_c0_g1_i1_142	G/A	TRINITY_DN87402_c0_g1_i1	142	NA	NA	+	TRINITY_DN87402_c0_g1_i1	NA	NA	NA	GG	GG	GA	GA	GG	GG
	UTRINITY_DN4738_c0_g1_i2_422	G/C	TRINITY_DN4738_c0_g1_i2	422	NA	NA	+	TRINITY_DN4738_c0_g1_i2	NA	NA	NA	CC	CC	GG	GG	GG	GG
	UTRINITY_DN4738_c0_g1_i2_434	C/T	TRINITY_DN4738_c0_g1_i2	434	NA	NA	+	TRINITY_DN4738_c0_g1_i2	NA	NA	NA	CC	CC	CC	CC	TT	TT
	UTRINITY_DN4738_c0_g1_i2_446	C/A	TRINITY_DN4738_c0_g1_i2	446	NA	NA	+	TRINITY_DN4738_c0_g1_i2	NA	NA	NA	CC	CC	CC	CC	AA	AA
	UTRINITY_DN4738_c0_g1_i2_707	T/C	TRINITY_DN4738_c0_g1_i2	707	NA	NA	+	TRINITY_DN4738_c0_g1_i2	NA	NA	NA	TT	TT	TT	TT	CC	CC
	UTRINITY_DN4738_c0_g1_i2_725	T/C	TRINITY_DN4738_c0_g1_i2	725	NA	NA	+	TRINITY_DN4738_c0_g1_i2	NA	NA	NA	TT	TT	TT	TT	CC	CC
	UTRINITY_DN15606_c0_g1_i1_184	C/T	TRINITY_DN15606_c0_g1_i1	184	NA	NA	+	TRINITY_DN15606_c0_g1_i1	NA	NA	NA	CC	CC	CC	CC	TT	TT
	UTRINITY_DN15606_c0_g1_i1_208	C/T	TRINITY_DN15606_c0_g1_i1	208	NA	NA	+	TRINITY_DN15606_c0_g1_i1	NA	NA	NA	CC	CC	CC	CC	TT	TT
	UTRINITY_DN15606_c0_g1_i1_214	C/T	TRINITY_DN15606_c0_g1_i1	214	NA	NA	+	TRINITY_DN15606_c0_g1_i1	NA	NA	NA	CC	CC	CC	CC	TT	TT
	UTRINITY_DN15606_c0_g1_i1_236	C/A	TRINITY_DN15606_c0_g1_i1	236	NA	NA	+	TRINITY_DN15606_c0_g1_i1	NA	NA	NA	CC	CC	CC	CC	AA	AA
	UTRINITY_DN15606_c0_g1_i1_301	G/A	TRINITY_DN15606_c0_g1_i1	301	NA	NA	+	TRINITY_DN15606_c0_g1_i1	NA	NA	NA	GG	GG	GG	GG	AA	AA
	UTRINITY_DN4309_c1_g1_i2_674	C/T	TRINITY_DN4309_c1_g1_i2	674	NA	NA	+	TRINITY_DN4309_c1_g1_i2	NA	NA	NA	CC	CC	CC	CC	TT	TT
	UTRINITY_DN4288_c0_g1_i3_368	A/G	TRINITY_DN4288_c0_g1_i3	368	NA	NA	+	TRINITY_DN4288_c0_g1_i3	NA	NA	NA	GG	GG	AA	AA	AA	AA
	UTRINITY_DN1519_c0_g1_i6_929	T/C	TRINITY_DN1519_c0_g1_i6	929	NA	NA	+	TRINITY_DN1519_c0_g1_i6	NA	NA	NA	TT	TT	TT	TT	CC	CC
	UTRINITY_DN1519_c0_g1_i6_1013	G/A	TRINITY_DN1519_c0_g1_i6	1013	NA	NA	+	TRINITY_DN1519_c0_g1_i6	NA	NA	NA	GG	GG	GG	GG	AA	AA
	UTRINITY_DN7620_c0_g1_i3_682	C/A	TRINITY_DN7620_c0_g1_i3	682	NA	NA	+	TRINITY_DN7620_c0_g1_i3	NA	NA	NA	CC	CC	AA	AA	CC	CC
	UTRINITY_DN8219_c0_g1_i6_3854	A/C	TRINITY_DN8219_c0_g1_i6	3854	NA	NA	+	TRINITY_DN8219_c0_g1_i6	NA	NA	NA	AA	AA	AA	AA	CA	CA
	UTRINITY_DN8219_c0_g1_i6_3856	G/C	TRINITY_DN8219_c0_g1_i6	3856	NA	NA	+	TRINITY_DN8219_c0_g1_i6	NA	NA	NA	GG	GG	GG	GG	CG	CG
	UTRINITY_DN18402_c0_g1_i9_411	T/C	TRINITY_DN18402_c0_g1_i9	411	NA	NA	+	TRINITY_DN18402_c0_g1_i9	NA	NA	NA	TT	TT	TT	TT	CC	CC
	UTRINITY_DN18402_c0_g1_i9_490	T/A	TRINITY_DN18402_c0_g1_i9	490	NA	NA	+	TRINITY_DN18402_c0_g1_i9	NA	NA	NA	TT	TT	TT	TT	AA	AA
	UTRINITY_DN1234_c5_g1_i1_82	G/A	TRINITY_DN1234_c5_g1_i1	82	NA	NA	+	TRINITY_DN1234_c5_g1_i1	NA	NA	NA	GA	GA	GG	GG	GG	GG
	UTRINITY_DN12440_c0_g1_i9_4624	C/T	TRINITY_DN12440_c0_g1_i9	4624	NA	NA	+	TRINITY_DN12440_c0_g1_i9	NA	NA	NA	CC	CC	CC	CC	TT	TT
	UTRINITY_DN12440_c0_g1_i9_4743	A/G	TRINITY_DN12440_c0_g1_i9	4743	NA	NA	+	TRINITY_DN12440_c0_g1_i9	NA	NA	NA	AA	AA	AA	AA	GG	GG
	UTRINITY_DN12398_c1_g1_i2_1268	G/C	TRINITY_DN12398_c1_g1_i2	1268	NA	NA	+	TRINITY_DN12398_c1_g1_i2	NA	NA	NA	GG	GG	CC	CC	GG	GG
	UTRINITY_DN42318_c0_g1_i4_543	C/T	TRINITY_DN42318_c0_g1_i4	543	NA	NA	+	TRINITY_DN42318_c0_g1_i4	NA	NA	NA	CT	CT	CC	CC	CC	CC
	UTRINITY_DN42318_c0_g1_i4_978	C/T	TRINITY_DN42318_c0_g1_i4	978	NA	NA	+	TRINITY_DN42318_c0_g1_i4	NA	NA	NA	CT	CT	CC	CC	CC	CC
	UTRINITY_DN5075_c0_g1_i7_586	G/C	TRINITY_DN5075_c0_g1_i7	586	NA	NA	+	TRINITY_DN5075_c0_g1_i7	NA	NA	NA	GG	GG	GG	GG	CC	CC
	UTRINITY_DN33379_c0_g1_i1_685	C/T	TRINITY_DN33379_c0_g1_i1	685	NA	NA	+	TRINITY_DN33379_c0_g1_i1	NA	NA	NA	CT	CT	CT	CT	CC	CC
	UTRINITY_DN33379_c0_g1_i1_743	T/C	TRINITY_DN33379_c0_g1_i1	743	NA	NA	+	TRINITY_DN33379_c0_g1_i1	NA	NA	NA	TC	TC	TT	TT	TC	TC
	UTRINITY_DN11771_c0_g1_i9_1089	A/G	TRINITY_DN11771_c0_g1_i9	1089	NA	NA	+	TRINITY_DN11771_c0_g1_i9	NA	NA	NA	AA	AA	AA	AA	AG	AG
	UTRINITY_DN11771_c0_g1_i9_1160	G/T	TRINITY_DN11771_c0_g1_i9	1160	NA	NA	+	TRINITY_DN11771_c0_g1_i9	NA	NA	NA	GG	GG	GG	GG	GT	GT
	UTRINITY_DN19963_c0_g1_i7_60	A/G	TRINITY_DN19963_c0_g1_i7	60	NA	NA	+	TRINITY_DN19963_c0_g1_i7	NA	NA	NA	AA	AA	AG	AG	AG	AG
	UTRINITY_DN19963_c0_g1_i7_69	A/C	TRINITY_DN19963_c0_g1_i7	69	NA	NA	+	TRINITY_DN19963_c0_g1_i7	NA	NA	NA	AA	AA	AC	AC	AC	AC
	UTRINITY_DN109_c2_g3_i1_66	C/A	TRINITY_DN109_c2_g3_i1	66	NA	NA	+	TRINITY_DN109_c2_g3_i1	NA	NA	NA	CA	CA	CC	CC	CC	CC
	UTRINITY_DN109_c2_g3_i1_75	T/C	TRINITY_DN109_c2_g3_i1	75	NA	NA	+	TRINITY_DN109_c2_g3_i1	NA	NA	NA	TC	TC	TT	TT	TT	TT
	UTRINITY_DN109_c2_g3_i1_81	C/T	TRINITY_DN109_c2_g3_i1	81	NA	NA	+	TRINITY_DN109_c2_g3_i1	NA	NA	NA	CT	CT	CC	CC	CC	CC
	UTRINITY_DN109_c2_g3_i1_84	A/G	TRINITY_DN109_c2_g3_i1	84	NA	NA	+	TRINITY_DN109_c2_g3_i1	NA	NA	NA	AG	AG	AA	AA	AA	AA
	UTRINITY_DN109_c2_g3_i1_87	C/G	TRINITY_DN109_c2_g3_i1	87	NA	NA	+	TRINITY_DN109_c2_g3_i1	NA	NA	NA	CG	CG	CC	CC	CC	CC
	UTRINITY_DN109_c2_g3_i1_186	T/C	TRINITY_DN109_c2_g3_i1	186	NA	NA	+	TRINITY_DN109_c2_g3_i1	NA	NA	NA	TT	TT	TC	TC	TT	TT
	UTRINITY_DN14582_c0_g1_i4_233	C/T	TRINITY_DN14582_c0_g1_i4	233	NA	NA	+	TRINITY_DN14582_c0_g1_i4	NA	NA	NA	CC	CC	CC	CC	TT	TT
	UTRINITY_DN659_c0_g1_i1_1703	T/C	TRINITY_DN659_c0_g1_i1	1703	NA	NA	+	TRINITY_DN659_c0_g1_i1	NA	NA	NA	TT	TT	TT	TT	CC	CC
	UTRINITY_DN918_c1_g2_i2_68	C/A	TRINITY_DN918_c1_g2_i2	68	NA	NA	+	TRINITY_DN918_c1_g2_i2	NA	NA	NA	CC	CC	CC	CC	CA	CA
	UTRINITY_DN918_c1_g2_i2_235	T/C	TRINITY_DN918_c1_g2_i2	235	NA	NA	+	TRINITY_DN918_c1_g2_i2	NA	NA	NA	TC	TC	TT	TT	TT	TT
	UTRINITY_DN2169_c0_g1_i3_57	T/A	TRINITY_DN2169_c0_g1_i3	57	NA	NA	+	TRINITY_DN2169_c0_g1_i3	NA	NA	NA	AA	AA	TT	TT	TT	TT
	UTRINITY_DN2169_c0_g1_i3_112	C/T	TRINITY_DN2169_c0_g1_i3	112	NA	NA	+	TRINITY_DN2169_c0_g1_i3	NA	NA	NA	CT	CT	CC	CC	CC	CC
	UTRINITY_DN2169_c0_g1_i3_129	G/A	TRINITY_DN2169_c0_g1_i3	129	NA	NA	+	TRINITY_DN2169_c0_g1_i3	NA	NA	NA	GA	GA	GG	GG	GG	GG
	UTRINITY_DN2895_c1_g1_i1_451	C/T	TRINITY_DN2895_c1_g1_i1	451	NA	NA	+	TRINITY_DN2895_c1_g1_i1	NA	NA	NA	CC	CC	CC	CC	TT	TT
	UTRINITY_DN2895_c1_g1_i1_538	C/T	TRINITY_DN2895_c1_g1_i1	538	NA	NA	+	TRINITY_DN2895_c1_g1_i1	NA	NA	NA	CC	CC	CC	CC	TT	TT
	UTRINITY_DN2895_c1_g1_i1_574	C/T	TRINITY_DN2895_c1_g1_i1	574	NA	NA	+	TRINITY_DN2895_c1_g1_i1	NA	NA	NA	CC	CC	CC	CC	TT	TT
	UTRINITY_DN2895_c1_g1_i1_590	G/A	TRINITY_DN2895_c1_g1_i1	590	NA	NA	+	TRINITY_DN2895_c1_g1_i1	NA	NA	NA	GG	GG	GG	GG	AA	AA
	UTRINITY_DN2895_c1_g1_i1_635	T/C	TRINITY_DN2895_c1_g1_i1	635	NA	NA	+	TRINITY_DN2895_c1_g1_i1	NA	NA	NA	TT	TT	TT	TT	CC	CC
	UTRINITY_DN2895_c1_g1_i1_644	A/G	TRINITY_DN2895_c1_g1_i1	644	NA	NA	+	TRINITY_DN2895_c1_g1_i1	NA	NA	NA	AA	AA	AA	AA	GG	GG
	UTRINITY_DN2895_c1_g1_i1_653	G/C	TRINITY_DN2895_c1_g1_i1	653	NA	NA	+	TRINITY_DN2895_c1_g1_i1	NA	NA	NA	GG	GG	GG	GG	CC	CC
	UTRINITY_DN22411_c0_g1_i13_1024	G/A	TRINITY_DN22411_c0_g1_i13	1024	NA	NA	+	TRINITY_DN22411_c0_g1_i13	NA	NA	NA	AG	AG	AG	AG	GG	GG
	UTRINITY_DN22411_c0_g1_i13_1081	T/C	TRINITY_DN22411_c0_g1_i13	1081	NA	NA	+	TRINITY_DN22411_c0_g1_i13	NA	NA	NA	TC	TC	TT	TT	CC	CC
	UTRINITY_DN7052_c0_g1_i2_217	T/C	TRINITY_DN7052_c0_g1_i2	217	NA	NA	+	TRINITY_DN7052_c0_g1_i2	NA	NA	NA	TT	TT	TT	TT	CC	CC
	UTRINITY_DN7052_c0_g1_i2_218	C/T	TRINITY_DN7052_c0_g1_i2	218	NA	NA	+	TRINITY_DN7052_c0_g1_i2	NA	NA	NA	CC	CC	CC	CC	TT	TT
	UTRINITY_DN4628_c0_g1_i11_1300	G/A	TRINITY_DN4628_c0_g1_i11	1300	NA	NA	+	TRINITY_DN4628_c0_g1_i11	NA	NA	NA	GG	GG	GG	GG	AA	AA
	UTRINITY_DN4628_c0_g1_i11_1497	A/G	TRINITY_DN4628_c0_g1_i11	1497	NA	NA	+	TRINITY_DN4628_c0_g1_i11	NA	NA	NA	AA	AA	AA	AA	GG	GG
	UTRINITY_DN7699_c0_g1_i4_1345	C/T	TRINITY_DN7699_c0_g1_i4	1345	NA	NA	+	TRINITY_DN7699_c0_g1_i4	NA	NA	NA	TT	TT	CC	CC	CC	CC
	UTRINITY_DN7699_c0_g1_i4_1360	A/T	TRINITY_DN7699_c0_g1_i4	1360	NA	NA	+	TRINITY_DN7699_c0_g1_i4	NA	NA	NA	TT	TT	AA	AA	AA	AA
	UTRINITY_DN10026_c0_g1_i3_1180	C/T	TRINITY_DN10026_c0_g1_i3	1180	NA	NA	+	TRINITY_DN10026_c0_g1_i3	NA	NA	NA	CC	CC	CC	CC	TT	TT
	UTRINITY_DN5109_c0_g1_i1_1070	G/A	TRINITY_DN5109_c0_g1_i1	1070	NA	NA	+	TRINITY_DN5109_c0_g1_i1	NA	NA	NA	GG	GG	GG	GG	AA	AA
	UTRINITY_DN1199_c0_g1_i4_2641	G/C	TRINITY_DN1199_c0_g1_i4	2641	NA	NA	+	TRINITY_DN1199_c0_g1_i4	NA	NA	NA	GG	GG	GC	GC	GG	GG
	UTRINITY_DN1199_c0_g1_i4_2647	C/T	TRINITY_DN1199_c0_g1_i4	2647	NA	NA	+	TRINITY_DN1199_c0_g1_i4	NA	NA	NA	CC	CC	CT	CT	CC	CC
	UTRINITY_DN7144_c0_g1_i1_427	G/C	TRINITY_DN7144_c0_g1_i1	427	NA	NA	+	TRINITY_DN7144_c0_g1_i1	NA	NA	NA	GG	GG	CC	CC	GG	GG
	UTRINITY_DN6744_c0_g1_i9_1250	G/C	TRINITY_DN6744_c0_g1_i9	1250	NA	NA	+	TRINITY_DN6744_c0_g1_i9	NA	NA	NA	CC	CC	GG	GG	GG	GG
	UTRINITY_DN6744_c0_g1_i9_1251	C/T	TRINITY_DN6744_c0_g1_i9	1251	NA	NA	+	TRINITY_DN6744_c0_g1_i9	NA	NA	NA	TT	TT	CC	CC	CC	CC
	UTRINITY_DN6744_c0_g1_i9_1257	C/G	TRINITY_DN6744_c0_g1_i9	1257	NA	NA	+	TRINITY_DN6744_c0_g1_i9	NA	NA	NA	GG	GG	CC	CC	CC	CC
	UTRINITY_DN6744_c0_g1_i9_1259	A/G	TRINITY_DN6744_c0_g1_i9	1259	NA	NA	+	TRINITY_DN6744_c0_g1_i9	NA	NA	NA	GG	GG	AA	AA	AA	AA
	UTRINITY_DN4520_c0_g1_i15_976	T/C	TRINITY_DN4520_c0_g1_i15	976	NA	NA	+	TRINITY_DN4520_c0_g1_i15	NA	NA	NA	TT	TT	TT	TT	CC	CC
	UTRINITY_DN4520_c0_g1_i15_1009	T/C	TRINITY_DN4520_c0_g1_i15	1009	NA	NA	+	TRINITY_DN4520_c0_g1_i15	NA	NA	NA	TT	TT	TT	TT	CC	CC
	UTRINITY_DN4520_c0_g1_i15_1011	C/T	TRINITY_DN4520_c0_g1_i15	1011	NA	NA	+	TRINITY_DN4520_c0_g1_i15	NA	NA	NA	CC	CC	CC	CC	TT	TT
	UTRINITY_DN15258_c0_g1_i5_417	G/T	TRINITY_DN15258_c0_g1_i5	417	NA	NA	+	TRINITY_DN15258_c0_g1_i5	NA	NA	NA	GG	GG	GG	GG	TT	TT
	UTRINITY_DN15258_c0_g1_i5_424	G/C	TRINITY_DN15258_c0_g1_i5	424	NA	NA	+	TRINITY_DN15258_c0_g1_i5	NA	NA	NA	GG	GG	GG	GG	CC	CC
	UTRINITY_DN15258_c0_g1_i5_473	T/G	TRINITY_DN15258_c0_g1_i5	473	NA	NA	+	TRINITY_DN15258_c0_g1_i5	NA	NA	NA	TT	TT	TT	TT	GG	GG
	UTRINITY_DN15258_c0_g1_i5_479	C/T	TRINITY_DN15258_c0_g1_i5	479	NA	NA	+	TRINITY_DN15258_c0_g1_i5	NA	NA	NA	CC	CC	CC	CC	TT	TT
	UTRINITY_DN15258_c0_g1_i5_480	A/T	TRINITY_DN15258_c0_g1_i5	480	NA	NA	+	TRINITY_DN15258_c0_g1_i5	NA	NA	NA	AA	AA	AA	AA	TT	TT
	UTRINITY_DN13887_c1_g1_i1_82	G/A	TRINITY_DN13887_c1_g1_i1	82	NA	NA	+	TRINITY_DN13887_c1_g1_i1	NA	NA	NA	GG	GG	GG	GG	GA	GA
	UTRINITY_DN5131_c0_g1_i4_1806	A/G	TRINITY_DN5131_c0_g1_i4	1806	NA	NA	+	TRINITY_DN5131_c0_g1_i4	NA	NA	NA	AA	AA	AA	AA	GG	GG
	UTRINITY_DN5131_c0_g1_i4_1818	A/C	TRINITY_DN5131_c0_g1_i4	1818	NA	NA	+	TRINITY_DN5131_c0_g1_i4	NA	NA	NA	AA	AA	AA	AA	CC	CC
	UTRINITY_DN13032_c0_g3_i1_207	T/G	TRINITY_DN13032_c0_g3_i1	207	NA	NA	+	TRINITY_DN13032_c0_g3_i1	NA	NA	NA	TT	TT	TG	TG	TG	TG
	UTRINITY_DN13032_c0_g3_i1_209	G/A	TRINITY_DN13032_c0_g3_i1	209	NA	NA	+	TRINITY_DN13032_c0_g3_i1	NA	NA	NA	GG	GG	GA	GA	GG	GG
	UTRINITY_DN13032_c0_g3_i1_564	A/C	TRINITY_DN13032_c0_g3_i1	564	NA	NA	+	TRINITY_DN13032_c0_g3_i1	NA	NA	NA	AA	AA	AA	AA	AC	AC
	UTRINITY_DN13032_c0_g3_i1_571	T/C	TRINITY_DN13032_c0_g3_i1	571	NA	NA	+	TRINITY_DN13032_c0_g3_i1	NA	NA	NA	TT	TT	TT	TT	TC	TC
	UTRINITY_DN13032_c0_g3_i1_610	G/T	TRINITY_DN13032_c0_g3_i1	610	NA	NA	+	TRINITY_DN13032_c0_g3_i1	NA	NA	NA	GG	GG	GG	GG	GT	GT
	UTRINITY_DN13032_c0_g3_i1_1098	G/C	TRINITY_DN13032_c0_g3_i1	1098	NA	NA	+	TRINITY_DN13032_c0_g3_i1	NA	NA	NA	--	--	GG	GG	GC	GC
	UTRINITY_DN3085_c0_g1_i2_313	C/T	TRINITY_DN3085_c0_g1_i2	313	NA	NA	+	TRINITY_DN3085_c0_g1_i2	NA	NA	NA	CC	CC	CC	CC	TT	TT
	UTRINITY_DN19995_c0_g2_i4_1048	A/G	TRINITY_DN19995_c0_g2_i4	1048	NA	NA	+	TRINITY_DN19995_c0_g2_i4	NA	NA	NA	AA	AA	AA	AA	GG	GG
	UTRINITY_DN10862_c0_g1_i4_425	C/G	TRINITY_DN10862_c0_g1_i4	425	NA	NA	+	TRINITY_DN10862_c0_g1_i4	NA	NA	NA	CC	CC	GG	GG	--	--
	UTRINITY_DN6168_c0_g1_i1_312	A/T	TRINITY_DN6168_c0_g1_i1	312	NA	NA	+	TRINITY_DN6168_c0_g1_i1	NA	NA	NA	AA	AA	AA	AA	TT	TT
	UTRINITY_DN6168_c0_g1_i1_313	A/C	TRINITY_DN6168_c0_g1_i1	313	NA	NA	+	TRINITY_DN6168_c0_g1_i1	NA	NA	NA	AA	AA	AA	AA	CC	CC
	UTRINITY_DN21639_c0_g1_i5_331	C/T	TRINITY_DN21639_c0_g1_i5	331	NA	NA	+	TRINITY_DN21639_c0_g1_i5	NA	NA	NA	CC	CC	CT	CT	CT	CT
	UTRINITY_DN21639_c0_g1_i5_928	G/T	TRINITY_DN21639_c0_g1_i5	928	NA	NA	+	TRINITY_DN21639_c0_g1_i5	NA	NA	NA	GT	GT	GT	GT	GG	GG
	UTRINITY_DN32810_c0_g1_i2_286	C/A	TRINITY_DN32810_c0_g1_i2	286	NA	NA	+	TRINITY_DN32810_c0_g1_i2	NA	NA	NA	CC	CC	CC	CC	AA	AA
	UTRINITY_DN32810_c0_g1_i2_323	A/G	TRINITY_DN32810_c0_g1_i2	323	NA	NA	+	TRINITY_DN32810_c0_g1_i2	NA	NA	NA	AA	AA	AA	AA	GG	GG
	UTRINITY_DN32810_c0_g1_i2_358	G/A	TRINITY_DN32810_c0_g1_i2	358	NA	NA	+	TRINITY_DN32810_c0_g1_i2	NA	NA	NA	GG	GG	GG	GG	AA	AA
	UTRINITY_DN16265_c0_g1_i1_234	A/T	TRINITY_DN16265_c0_g1_i1	234	NA	NA	+	TRINITY_DN16265_c0_g1_i1	NA	NA	NA	TT	TT	AA	AA	AA	AA
	UTRINITY_DN39180_c0_g1_i1_252	G/T	TRINITY_DN39180_c0_g1_i1	252	NA	NA	+	TRINITY_DN39180_c0_g1_i1	NA	NA	NA	GG	GG	GT	GT	GG	GG
	UTRINITY_DN39180_c0_g1_i1_372	A/G	TRINITY_DN39180_c0_g1_i1	372	NA	NA	+	TRINITY_DN39180_c0_g1_i1	NA	NA	NA	AA	AA	AG	AG	AA	AA
	UTRINITY_DN39180_c0_g1_i1_395	A/G	TRINITY_DN39180_c0_g1_i1	395	NA	NA	+	TRINITY_DN39180_c0_g1_i1	NA	NA	NA	AA	AA	AG	AG	AA	AA
	UTRINITY_DN39180_c0_g1_i1_429	A/T	TRINITY_DN39180_c0_g1_i1	429	NA	NA	+	TRINITY_DN39180_c0_g1_i1	NA	NA	NA	AA	AA	AT	AT	AA	AA
	UTRINITY_DN39180_c0_g1_i1_620	C/T	TRINITY_DN39180_c0_g1_i1	620	NA	NA	+	TRINITY_DN39180_c0_g1_i1	NA	NA	NA	CC	CC	CT	CT	CC	CC
	UTRINITY_DN19658_c0_g1_i3_2190	T/C	TRINITY_DN19658_c0_g1_i3	2190	NA	NA	+	TRINITY_DN19658_c0_g1_i3	NA	NA	NA	TT	TT	TT	TT	CC	CC
	UTRINITY_DN19658_c0_g1_i3_2240	C/T	TRINITY_DN19658_c0_g1_i3	2240	NA	NA	+	TRINITY_DN19658_c0_g1_i3	NA	NA	NA	CC	CC	CC	CC	TT	TT
	UTRINITY_DN25253_c0_g1_i1_306	C/T	TRINITY_DN25253_c0_g1_i1	306	NA	NA	+	TRINITY_DN25253_c0_g1_i1	NA	NA	NA	CC	CC	CC	CC	TT	TT
	UTRINITY_DN25253_c0_g1_i1_406	T/C	TRINITY_DN25253_c0_g1_i1	406	NA	NA	+	TRINITY_DN25253_c0_g1_i1	NA	NA	NA	TT	TT	TT	TT	CC	CC
	UTRINITY_DN25253_c0_g1_i1_410	C/G	TRINITY_DN25253_c0_g1_i1	410	NA	NA	+	TRINITY_DN25253_c0_g1_i1	NA	NA	NA	CC	CC	CC	CC	GG	GG
	UTRINITY_DN3587_c0_g1_i4_5242	C/T	TRINITY_DN3587_c0_g1_i4	5242	NA	NA	+	TRINITY_DN3587_c0_g1_i4	NA	NA	NA	CT	CT	CC	CC	CC	CC
	UTRINITY_DN13673_c0_g1_i1_62	T/A	TRINITY_DN13673_c0_g1_i1	62	NA	NA	+	TRINITY_DN13673_c0_g1_i1	NA	NA	NA	TT	TT	TT	TT	AA	AA
	UTRINITY_DN13673_c0_g1_i1_116	T/C	TRINITY_DN13673_c0_g1_i1	116	NA	NA	+	TRINITY_DN13673_c0_g1_i1	NA	NA	NA	TT	TT	TT	TT	CC	CC
	UTRINITY_DN13673_c0_g1_i1_165	A/T	TRINITY_DN13673_c0_g1_i1	165	NA	NA	+	TRINITY_DN13673_c0_g1_i1	NA	NA	NA	AA	AA	AA	AA	TT	TT
	UTRINITY_DN13673_c0_g1_i1_169	A/G	TRINITY_DN13673_c0_g1_i1	169	NA	NA	+	TRINITY_DN13673_c0_g1_i1	NA	NA	NA	AA	AA	AA	AA	GG	GG
	UTRINITY_DN13673_c0_g1_i1_205	A/G	TRINITY_DN13673_c0_g1_i1	205	NA	NA	+	TRINITY_DN13673_c0_g1_i1	NA	NA	NA	AA	AA	AA	AA	GG	GG
	UTRINITY_DN35439_c0_g1_i10_527	C/T	TRINITY_DN35439_c0_g1_i10	527	NA	NA	+	TRINITY_DN35439_c0_g1_i10	NA	NA	NA	CC	CC	CC	CC	TT	TT
	UTRINITY_DN1191_c0_g1_i6_327	C/A	TRINITY_DN1191_c0_g1_i6	327	NA	NA	+	TRINITY_DN1191_c0_g1_i6	NA	NA	NA	CC	CC	CC	CC	CA	CA
	UTRINITY_DN1191_c0_g1_i6_329	G/C	TRINITY_DN1191_c0_g1_i6	329	NA	NA	+	TRINITY_DN1191_c0_g1_i6	NA	NA	NA	GG	GG	GG	GG	GC	GC
	UTRINITY_DN980_c0_g1_i4_648	C/T	TRINITY_DN980_c0_g1_i4	648	NA	NA	+	TRINITY_DN980_c0_g1_i4	NA	NA	NA	CC	CC	TT	TT	CC	CC
	UTRINITY_DN3641_c1_g1_i1_200	C/T	TRINITY_DN3641_c1_g1_i1	200	NA	NA	+	TRINITY_DN3641_c1_g1_i1	NA	NA	NA	CC	CC	CC	CC	TT	TT
	UTRINITY_DN3641_c1_g1_i1_273	G/T	TRINITY_DN3641_c1_g1_i1	273	NA	NA	+	TRINITY_DN3641_c1_g1_i1	NA	NA	NA	GG	GG	GG	GG	TT	TT
	UTRINITY_DN3641_c1_g1_i1_317	G/C	TRINITY_DN3641_c1_g1_i1	317	NA	NA	+	TRINITY_DN3641_c1_g1_i1	NA	NA	NA	GG	GG	GG	GG	CC	CC
	UTRINITY_DN3641_c1_g1_i1_319	C/G	TRINITY_DN3641_c1_g1_i1	319	NA	NA	+	TRINITY_DN3641_c1_g1_i1	NA	NA	NA	CC	CC	CC	CC	GG	GG
	UTRINITY_DN8561_c0_g1_i2_1803	C/T	TRINITY_DN8561_c0_g1_i2	1803	NA	NA	+	TRINITY_DN8561_c0_g1_i2	NA	NA	NA	CT	CT	CC	CC	CT	CT
	UTRINITY_DN8561_c0_g1_i2_1914	C/T	TRINITY_DN8561_c0_g1_i2	1914	NA	NA	+	TRINITY_DN8561_c0_g1_i2	NA	NA	NA	CT	CT	CC	CC	CT	CT
	UTRINITY_DN3026_c0_g1_i9_789	G/T	TRINITY_DN3026_c0_g1_i9	789	NA	NA	+	TRINITY_DN3026_c0_g1_i9	NA	NA	NA	GG	GG	GG	GG	TT	TT
	UTRINITY_DN3026_c0_g1_i9_792	C/G	TRINITY_DN3026_c0_g1_i9	792	NA	NA	+	TRINITY_DN3026_c0_g1_i9	NA	NA	NA	CC	CC	CC	CC	GG	GG
	UTRINITY_DN3026_c0_g1_i9_795	T/C	TRINITY_DN3026_c0_g1_i9	795	NA	NA	+	TRINITY_DN3026_c0_g1_i9	NA	NA	NA	TT	TT	TT	TT	CC	CC
	UTRINITY_DN3026_c0_g1_i9_798	A/G	TRINITY_DN3026_c0_g1_i9	798	NA	NA	+	TRINITY_DN3026_c0_g1_i9	NA	NA	NA	AA	AA	AA	AA	GG	GG
	UTRINITY_DN3026_c0_g1_i9_807	T/C	TRINITY_DN3026_c0_g1_i9	807	NA	NA	+	TRINITY_DN3026_c0_g1_i9	NA	NA	NA	TT	TT	TT	TT	CC	CC
	UTRINITY_DN4016_c0_g1_i3_2313	T/C	TRINITY_DN4016_c0_g1_i3	2313	NA	NA	+	TRINITY_DN4016_c0_g1_i3	NA	NA	NA	TT	TT	TT	TT	CC	CC
	UTRINITY_DN7944_c0_g1_i5_858	C/T	TRINITY_DN7944_c0_g1_i5	858	NA	NA	+	TRINITY_DN7944_c0_g1_i5	NA	NA	NA	CC	CC	CC	CC	TT	TT
	UTRINITY_DN7944_c0_g1_i5_860	G/C	TRINITY_DN7944_c0_g1_i5	860	NA	NA	+	TRINITY_DN7944_c0_g1_i5	NA	NA	NA	GG	GG	GG	GG	CC	CC
	UTRINITY_DN13465_c0_g3_i1_943	C/T	TRINITY_DN13465_c0_g3_i1	943	NA	NA	+	TRINITY_DN13465_c0_g3_i1	NA	NA	NA	CC	CC	CT	CT	CT	CT
	UTRINITY_DN13465_c0_g3_i1_944	C/G	TRINITY_DN13465_c0_g3_i1	944	NA	NA	+	TRINITY_DN13465_c0_g3_i1	NA	NA	NA	CC	CC	CG	CG	CG	CG
	UTRINITY_DN34354_c0_g1_i1_74	G/T	TRINITY_DN34354_c0_g1_i1	74	NA	NA	+	TRINITY_DN34354_c0_g1_i1	NA	NA	NA	GG	GG	GG	GG	TT	TT
	UTRINITY_DN42146_c0_g1_i2_127	T/A	TRINITY_DN42146_c0_g1_i2	127	NA	NA	+	TRINITY_DN42146_c0_g1_i2	NA	NA	NA	TT	TT	TT	TT	AA	AA
	UTRINITY_DN16986_c0_g1_i5_1351	T/C	TRINITY_DN16986_c0_g1_i5	1351	NA	NA	+	TRINITY_DN16986_c0_g1_i5	NA	NA	NA	TT	TT	TT	TT	CC	CC
	UTRINITY_DN14544_c0_g1_i1_252	T/C	TRINITY_DN14544_c0_g1_i1	252	NA	NA	+	TRINITY_DN14544_c0_g1_i1	NA	NA	NA	TT	TT	TT	TT	CC	CC
	UTRINITY_DN14544_c0_g1_i1_270	C/T	TRINITY_DN14544_c0_g1_i1	270	NA	NA	+	TRINITY_DN14544_c0_g1_i1	NA	NA	NA	CC	CC	CC	CC	TT	TT
	UTRINITY_DN8838_c0_g2_i1_1138	C/G	TRINITY_DN8838_c0_g2_i1	1138	NA	NA	+	TRINITY_DN8838_c0_g2_i1	NA	NA	NA	CC	CC	CC	CC	GG	GG
	UTRINITY_DN10496_c0_g1_i11_2425	G/A	TRINITY_DN10496_c0_g1_i11	2425	NA	NA	+	TRINITY_DN10496_c0_g1_i11	NA	NA	NA	GG	GG	GA	GA	GA	GA
	UTRINITY_DN10496_c0_g1_i11_2447	C/G	TRINITY_DN10496_c0_g1_i11	2447	NA	NA	+	TRINITY_DN10496_c0_g1_i11	NA	NA	NA	CC	CC	CG	CG	CG	CG
	UTRINITY_DN35839_c0_g1_i5_215	G/C	TRINITY_DN35839_c0_g1_i5	215	NA	NA	+	TRINITY_DN35839_c0_g1_i5	NA	NA	NA	CC	CC	GG	GG	GG	GG
	UTRINITY_DN8688_c0_g1_i5_465	T/C	TRINITY_DN8688_c0_g1_i5	465	NA	NA	+	TRINITY_DN8688_c0_g1_i5	NA	NA	NA	TT	TT	TT	TT	CC	CC
	UTRINITY_DN3832_c0_g1_i2_460	A/G	TRINITY_DN3832_c0_g1_i2	460	NA	NA	+	TRINITY_DN3832_c0_g1_i2	NA	NA	NA	AA	AA	AA	AA	GG	GG
	UTRINITY_DN3832_c0_g1_i2_466	C/G	TRINITY_DN3832_c0_g1_i2	466	NA	NA	+	TRINITY_DN3832_c0_g1_i2	NA	NA	NA	CC	CC	CC	CC	GG	GG
	UTRINITY_DN100367_c0_g2_i1_122	G/T	TRINITY_DN100367_c0_g2_i1	122	NA	NA	+	TRINITY_DN100367_c0_g2_i1	NA	NA	NA	GG	GG	GG	GG	GT	GT
	UTRINITY_DN15056_c0_g1_i1_31	T/G	TRINITY_DN15056_c0_g1_i1	31	NA	NA	+	TRINITY_DN15056_c0_g1_i1	NA	NA	NA	TT	TT	TT	TT	GG	GG
	UTRINITY_DN12808_c0_g1_i1_72	G/A	TRINITY_DN12808_c0_g1_i1	72	NA	NA	+	TRINITY_DN12808_c0_g1_i1	NA	NA	NA	GG	GG	GG	GG	AA	AA
	UTRINITY_DN12808_c0_g1_i1_226	T/C	TRINITY_DN12808_c0_g1_i1	226	NA	NA	+	TRINITY_DN12808_c0_g1_i1	NA	NA	NA	TC	TC	TC	TC	TT	TT
	UTRINITY_DN12808_c0_g1_i1_245	C/T	TRINITY_DN12808_c0_g1_i1	245	NA	NA	+	TRINITY_DN12808_c0_g1_i1	NA	NA	NA	CT	CT	CT	CT	CC	CC
	UTRINITY_DN1625_c0_g1_i1_1466	C/T	TRINITY_DN1625_c0_g1_i1	1466	NA	NA	+	TRINITY_DN1625_c0_g1_i1	NA	NA	NA	CC	CC	CC	CC	TT	TT
	UTRINITY_DN1625_c0_g1_i1_1571	A/G	TRINITY_DN1625_c0_g1_i1	1571	NA	NA	+	TRINITY_DN1625_c0_g1_i1	NA	NA	NA	AA	AA	AA	AA	GG	GG
	UTRINITY_DN1625_c0_g1_i1_1668	C/A	TRINITY_DN1625_c0_g1_i1	1668	NA	NA	+	TRINITY_DN1625_c0_g1_i1	NA	NA	NA	CC	CC	CC	CC	AA	AA
	UTRINITY_DN11850_c0_g1_i10_34	T/A	TRINITY_DN11850_c0_g1_i10	34	NA	NA	+	TRINITY_DN11850_c0_g1_i10	NA	NA	NA	TT	TT	TT	TT	TA	TA
	UTRINITY_DN11850_c0_g1_i10_146	C/G	TRINITY_DN11850_c0_g1_i10	146	NA	NA	+	TRINITY_DN11850_c0_g1_i10	NA	NA	NA	CC	CC	CC	CC	CG	CG
	UTRINITY_DN11850_c0_g1_i10_168	C/T	TRINITY_DN11850_c0_g1_i10	168	NA	NA	+	TRINITY_DN11850_c0_g1_i10	NA	NA	NA	CC	CC	CC	CC	CT	CT
	UTRINITY_DN11850_c0_g1_i10_240	G/T	TRINITY_DN11850_c0_g1_i10	240	NA	NA	+	TRINITY_DN11850_c0_g1_i10	NA	NA	NA	GG	GG	TG	TG	GG	GG
	UTRINITY_DN6654_c0_g1_i4_532	G/A	TRINITY_DN6654_c0_g1_i4	532	NA	NA	+	TRINITY_DN6654_c0_g1_i4	NA	NA	NA	GG	GG	AA	AA	GG	GG
	UTRINITY_DN4481_c0_g1_i4_350	C/A	TRINITY_DN4481_c0_g1_i4	350	NA	NA	+	TRINITY_DN4481_c0_g1_i4	NA	NA	NA	CC	CC	CC	CC	CA	CA
	UTRINITY_DN4481_c0_g1_i4_369	C/T	TRINITY_DN4481_c0_g1_i4	369	NA	NA	+	TRINITY_DN4481_c0_g1_i4	NA	NA	NA	CC	CC	CC	CC	CT	CT
	UTRINITY_DN3355_c0_g2_i1_451	C/A	TRINITY_DN3355_c0_g2_i1	451	NA	NA	+	TRINITY_DN3355_c0_g2_i1	NA	NA	NA	CC	CC	CC	CC	AA	AA
	UTRINITY_DN3355_c0_g2_i1_1078	C/T	TRINITY_DN3355_c0_g2_i1	1078	NA	NA	+	TRINITY_DN3355_c0_g2_i1	NA	NA	NA	CT	CT	CT	CT	CC	CC
	UTRINITY_DN3355_c0_g2_i1_1165	A/G	TRINITY_DN3355_c0_g2_i1	1165	NA	NA	+	TRINITY_DN3355_c0_g2_i1	NA	NA	NA	AA	AA	AA	AA	AG	AG
	UTRINITY_DN508_c1_g3_i2_859	G/A	TRINITY_DN508_c1_g3_i2	859	NA	NA	+	TRINITY_DN508_c1_g3_i2	NA	NA	NA	AA	AA	GG	GG	GG	GG
	UTRINITY_DN508_c1_g3_i2_865	A/G	TRINITY_DN508_c1_g3_i2	865	NA	NA	+	TRINITY_DN508_c1_g3_i2	NA	NA	NA	GG	GG	AA	AA	AA	AA
	UTRINITY_DN39426_c0_g1_i2_300	G/A	TRINITY_DN39426_c0_g1_i2	300	NA	NA	+	TRINITY_DN39426_c0_g1_i2	NA	NA	NA	GG	GG	GG	GG	AA	AA
	UTRINITY_DN39426_c0_g1_i2_318	A/G	TRINITY_DN39426_c0_g1_i2	318	NA	NA	+	TRINITY_DN39426_c0_g1_i2	NA	NA	NA	AA	AA	AA	AA	GG	GG
	UTRINITY_DN7010_c0_g1_i7_1337	A/T	TRINITY_DN7010_c0_g1_i7	1337	NA	NA	+	TRINITY_DN7010_c0_g1_i7	NA	NA	NA	--	--	AT	AT	AA	AA
	UTRINITY_DN7010_c0_g1_i7_1345	C/A	TRINITY_DN7010_c0_g1_i7	1345	NA	NA	+	TRINITY_DN7010_c0_g1_i7	NA	NA	NA	--	--	CA	CA	CC	CC
	UTRINITY_DN5472_c0_g1_i3_1087	A/G	TRINITY_DN5472_c0_g1_i3	1087	NA	NA	+	TRINITY_DN5472_c0_g1_i3	NA	NA	NA	AA	AA	AA	AA	AG	AG
	UTRINITY_DN5472_c0_g1_i3_1091	A/T	TRINITY_DN5472_c0_g1_i3	1091	NA	NA	+	TRINITY_DN5472_c0_g1_i3	NA	NA	NA	AA	AA	AA	AA	AT	AT
	UTRINITY_DN5472_c0_g1_i3_1153	A/G	TRINITY_DN5472_c0_g1_i3	1153	NA	NA	+	TRINITY_DN5472_c0_g1_i3	NA	NA	NA	AA	AA	AA	AA	AG	AG
	UTRINITY_DN5472_c0_g1_i3_1285	T/A	TRINITY_DN5472_c0_g1_i3	1285	NA	NA	+	TRINITY_DN5472_c0_g1_i3	NA	NA	NA	TT	TT	TT	TT	TA	TA
	UTRINITY_DN5472_c0_g1_i3_1297	A/T	TRINITY_DN5472_c0_g1_i3	1297	NA	NA	+	TRINITY_DN5472_c0_g1_i3	NA	NA	NA	AA	AA	AA	AA	AT	AT
	UTRINITY_DN76975_c0_g1_i1_175	A/G	TRINITY_DN76975_c0_g1_i1	175	NA	NA	+	TRINITY_DN76975_c0_g1_i1	NA	NA	NA	AA	AA	AA	AA	GG	GG
	UTRINITY_DN4298_c0_g1_i1_378	G/T	TRINITY_DN4298_c0_g1_i1	378	NA	NA	+	TRINITY_DN4298_c0_g1_i1	NA	NA	NA	TT	TT	GG	GG	GG	GG
	UTRINITY_DN62324_c1_g1_i3_355	C/T	TRINITY_DN62324_c1_g1_i3	355	NA	NA	+	TRINITY_DN62324_c1_g1_i3	NA	NA	NA	TT	TT	CC	CC	CC	CC
	UTRINITY_DN62324_c1_g1_i3_357	G/T	TRINITY_DN62324_c1_g1_i3	357	NA	NA	+	TRINITY_DN62324_c1_g1_i3	NA	NA	NA	TT	TT	GG	GG	GG	GG
	UTRINITY_DN62324_c1_g1_i3_559	C/T	TRINITY_DN62324_c1_g1_i3	559	NA	NA	+	TRINITY_DN62324_c1_g1_i3	NA	NA	NA	CC	CC	CT	CT	CT	CT
	UTRINITY_DN1301_c1_g1_i4_471	G/C	TRINITY_DN1301_c1_g1_i4	471	NA	NA	+	TRINITY_DN1301_c1_g1_i4	NA	NA	NA	GG	GG	CC	CC	GG	GG
	UTRINITY_DN5841_c0_g4_i1_103	A/G	TRINITY_DN5841_c0_g4_i1	103	NA	NA	+	TRINITY_DN5841_c0_g4_i1	NA	NA	NA	AA	AA	AA	AA	GG	GG
	UTRINITY_DN3400_c0_g2_i1_530	G/A	TRINITY_DN3400_c0_g2_i1	530	NA	NA	+	TRINITY_DN3400_c0_g2_i1	NA	NA	NA	GG	GG	GA	GA	GG	GG
	UTRINITY_DN3400_c0_g2_i1_590	T/C	TRINITY_DN3400_c0_g2_i1	590	NA	NA	+	TRINITY_DN3400_c0_g2_i1	NA	NA	NA	TT	TT	TC	TC	TT	TT
	UTRINITY_DN3400_c0_g2_i1_591	C/G	TRINITY_DN3400_c0_g2_i1	591	NA	NA	+	TRINITY_DN3400_c0_g2_i1	NA	NA	NA	CC	CC	CG	CG	CC	CC
	UTRINITY_DN6056_c0_g1_i5_349	T/G	TRINITY_DN6056_c0_g1_i5	349	NA	NA	+	TRINITY_DN6056_c0_g1_i5	NA	NA	NA	TT	TT	TT	TT	GG	GG
	UTRINITY_DN1929_c0_g2_i3_38	G/A	TRINITY_DN1929_c0_g2_i3	38	NA	NA	+	TRINITY_DN1929_c0_g2_i3	NA	NA	NA	GA	GA	GA	GA	GG	GG
	UTRINITY_DN4595_c0_g1_i2_1435	G/C	TRINITY_DN4595_c0_g1_i2	1435	NA	NA	+	TRINITY_DN4595_c0_g1_i2	NA	NA	NA	GG	GG	GG	GG	CC	CC
	UTRINITY_DN5888_c0_g1_i1_1435	C/T	TRINITY_DN5888_c0_g1_i1	1435	NA	NA	+	TRINITY_DN5888_c0_g1_i1	NA	NA	NA	CT	CT	CC	CC	CT	CT
	UTRINITY_DN5888_c0_g1_i1_1555	C/T	TRINITY_DN5888_c0_g1_i1	1555	NA	NA	+	TRINITY_DN5888_c0_g1_i1	NA	NA	NA	CT	CT	CC	CC	CT	CT
	UTRINITY_DN11019_c0_g1_i7_1307	A/G	TRINITY_DN11019_c0_g1_i7	1307	NA	NA	+	TRINITY_DN11019_c0_g1_i7	NA	NA	NA	AA	AA	AG	AG	AG	AG
	UTRINITY_DN19609_c0_g1_i2_103	G/A	TRINITY_DN19609_c0_g1_i2	103	NA	NA	+	TRINITY_DN19609_c0_g1_i2	NA	NA	NA	GG	GG	GG	GG	AA	AA
	UTRINITY_DN19609_c0_g1_i2_152	G/A	TRINITY_DN19609_c0_g1_i2	152	NA	NA	+	TRINITY_DN19609_c0_g1_i2	NA	NA	NA	GG	GG	GG	GG	AA	AA
	UTRINITY_DN61602_c0_g1_i4_118	C/G	TRINITY_DN61602_c0_g1_i4	118	NA	NA	+	TRINITY_DN61602_c0_g1_i4	NA	NA	NA	--	--	GG	GG	CC	CC
	UTRINITY_DN2486_c0_g1_i9_1844	A/G	TRINITY_DN2486_c0_g1_i9	1844	NA	NA	+	TRINITY_DN2486_c0_g1_i9	NA	NA	NA	AA	AA	AA	AA	GG	GG
	UTRINITY_DN2486_c0_g1_i9_1846	G/A	TRINITY_DN2486_c0_g1_i9	1846	NA	NA	+	TRINITY_DN2486_c0_g1_i9	NA	NA	NA	GG	GG	GG	GG	AA	AA
	UTRINITY_DN2486_c0_g1_i9_1852	A/G	TRINITY_DN2486_c0_g1_i9	1852	NA	NA	+	TRINITY_DN2486_c0_g1_i9	NA	NA	NA	AA	AA	AA	AA	GG	GG
	UTRINITY_DN11605_c0_g1_i13_709	G/A	TRINITY_DN11605_c0_g1_i13	709	NA	NA	+	TRINITY_DN11605_c0_g1_i13	NA	NA	NA	GG	GG	AA	AA	GG	GG
	UTRINITY_DN78201_c0_g1_i1_55	G/T	TRINITY_DN78201_c0_g1_i1	55	NA	NA	+	TRINITY_DN78201_c0_g1_i1	NA	NA	NA	GG	GG	GG	GG	TT	TT
	UTRINITY_DN78201_c0_g1_i1_137	T/C	TRINITY_DN78201_c0_g1_i1	137	NA	NA	+	TRINITY_DN78201_c0_g1_i1	NA	NA	NA	TT	TT	TT	TT	CC	CC
	UTRINITY_DN1765_c0_g1_i7_1526	T/C	TRINITY_DN1765_c0_g1_i7	1526	NA	NA	+	TRINITY_DN1765_c0_g1_i7	NA	NA	NA	TT	TT	CC	CC	TT	TT
	UTRINITY_DN13163_c1_g1_i4_729	A/G	TRINITY_DN13163_c1_g1_i4	729	NA	NA	+	TRINITY_DN13163_c1_g1_i4	NA	NA	NA	GG	GG	AA	AA	AA	AA
	UTRINITY_DN8345_c0_g1_i3_1270	A/G	TRINITY_DN8345_c0_g1_i3	1270	NA	NA	+	TRINITY_DN8345_c0_g1_i3	NA	NA	NA	AA	AA	AA	AA	GG	GG
	UTRINITY_DN8345_c0_g1_i3_1358	G/A	TRINITY_DN8345_c0_g1_i3	1358	NA	NA	+	TRINITY_DN8345_c0_g1_i3	NA	NA	NA	GG	GG	GG	GG	AA	AA
	UTRINITY_DN8345_c0_g1_i3_1362	A/C	TRINITY_DN8345_c0_g1_i3	1362	NA	NA	+	TRINITY_DN8345_c0_g1_i3	NA	NA	NA	AA	AA	AA	AA	CC	CC
	UTRINITY_DN1418_c1_g1_i4_802	C/G	TRINITY_DN1418_c1_g1_i4	802	NA	NA	+	TRINITY_DN1418_c1_g1_i4	NA	NA	NA	CC	CC	CC	CC	GG	GG
	UTRINITY_DN1418_c1_g1_i4_862	C/T	TRINITY_DN1418_c1_g1_i4	862	NA	NA	+	TRINITY_DN1418_c1_g1_i4	NA	NA	NA	CC	CC	CC	CC	TT	TT
	UTRINITY_DN9427_c0_g1_i1_1727	G/A	TRINITY_DN9427_c0_g1_i1	1727	NA	NA	+	TRINITY_DN9427_c0_g1_i1	NA	NA	NA	GG	GG	GG	GG	GA	GA
	UTRINITY_DN9427_c0_g1_i1_1806	C/A	TRINITY_DN9427_c0_g1_i1	1806	NA	NA	+	TRINITY_DN9427_c0_g1_i1	NA	NA	NA	CC	CC	CC	CC	CA	CA
	UTRINITY_DN5989_c0_g1_i3_971	A/G	TRINITY_DN5989_c0_g1_i3	971	NA	NA	+	TRINITY_DN5989_c0_g1_i3	NA	NA	NA	AA	AA	AA	AA	GG	GG
	UTRINITY_DN37031_c0_g1_i6_152	T/C	TRINITY_DN37031_c0_g1_i6	152	NA	NA	+	TRINITY_DN37031_c0_g1_i6	NA	NA	NA	CC	CC	TT	TT	TT	TT
	UTRINITY_DN37031_c0_g1_i6_170	T/C	TRINITY_DN37031_c0_g1_i6	170	NA	NA	+	TRINITY_DN37031_c0_g1_i6	NA	NA	NA	TT	TT	TT	TT	CC	CC
	UTRINITY_DN37031_c0_g1_i6_173	A/T	TRINITY_DN37031_c0_g1_i6	173	NA	NA	+	TRINITY_DN37031_c0_g1_i6	NA	NA	NA	AA	AA	AA	AA	TT	TT
	UTRINITY_DN37031_c0_g1_i6_182	G/A	TRINITY_DN37031_c0_g1_i6	182	NA	NA	+	TRINITY_DN37031_c0_g1_i6	NA	NA	NA	AA	AA	GG	GG	GG	GG
	UTRINITY_DN2689_c0_g1_i5_2503	A/C	TRINITY_DN2689_c0_g1_i5	2503	NA	NA	+	TRINITY_DN2689_c0_g1_i5	NA	NA	NA	AA	AA	AA	AA	CC	CC
	UTRINITY_DN5830_c1_g1_i5_1613	C/G	TRINITY_DN5830_c1_g1_i5	1613	NA	NA	+	TRINITY_DN5830_c1_g1_i5	NA	NA	NA	CC	CC	CG	CG	CC	CC
	UTRINITY_DN5830_c1_g1_i5_1624	A/G	TRINITY_DN5830_c1_g1_i5	1624	NA	NA	+	TRINITY_DN5830_c1_g1_i5	NA	NA	NA	GG	GG	GA	GA	AA	AA
	UTRINITY_DN13991_c0_g1_i2_985	C/T	TRINITY_DN13991_c0_g1_i2	985	NA	NA	+	TRINITY_DN13991_c0_g1_i2	NA	NA	NA	CC	CC	CC	CC	TT	TT
	UTRINITY_DN13991_c0_g1_i2_1030	C/T	TRINITY_DN13991_c0_g1_i2	1030	NA	NA	+	TRINITY_DN13991_c0_g1_i2	NA	NA	NA	CC	CC	CC	CC	TT	TT
	UTRINITY_DN1779_c0_g1_i1_1318	G/A	TRINITY_DN1779_c0_g1_i1	1318	NA	NA	+	TRINITY_DN1779_c0_g1_i1	NA	NA	NA	AA	AA	GG	GG	GG	GG
	UTRINITY_DN1779_c0_g1_i1_1319	C/T	TRINITY_DN1779_c0_g1_i1	1319	NA	NA	+	TRINITY_DN1779_c0_g1_i1	NA	NA	NA	TT	TT	CC	CC	CC	CC
	UTRINITY_DN1671_c0_g1_i8_1371	G/A	TRINITY_DN1671_c0_g1_i8	1371	NA	NA	+	TRINITY_DN1671_c0_g1_i8	NA	NA	NA	GG	GG	GG	GG	GA	GA
	UTRINITY_DN1671_c0_g1_i8_1418	G/A	TRINITY_DN1671_c0_g1_i8	1418	NA	NA	+	TRINITY_DN1671_c0_g1_i8	NA	NA	NA	GG	GG	GG	GG	GA	GA
	UTRINITY_DN1671_c0_g1_i8_1708	A/G	TRINITY_DN1671_c0_g1_i8	1708	NA	NA	+	TRINITY_DN1671_c0_g1_i8	NA	NA	NA	AG	AG	AG	AG	AA	AA
	UTRINITY_DN68_c0_g1_i2_568	G/C	TRINITY_DN68_c0_g1_i2	568	NA	NA	+	TRINITY_DN68_c0_g1_i2	NA	NA	NA	GG	GG	GG	GG	CC	CC
	UTRINITY_DN68_c0_g1_i2_628	G/C	TRINITY_DN68_c0_g1_i2	628	NA	NA	+	TRINITY_DN68_c0_g1_i2	NA	NA	NA	GG	GG	GG	GG	CC	CC
	UTRINITY_DN43049_c0_g1_i2_163	C/T	TRINITY_DN43049_c0_g1_i2	163	NA	NA	+	TRINITY_DN43049_c0_g1_i2	NA	NA	NA	CC	CC	CC	CC	TT	TT
	UTRINITY_DN17453_c0_g1_i1_261	C/T	TRINITY_DN17453_c0_g1_i1	261	NA	NA	+	TRINITY_DN17453_c0_g1_i1	NA	NA	NA	CC	CC	CT	CT	CC	CC
	UTRINITY_DN17453_c0_g1_i1_282	C/G	TRINITY_DN17453_c0_g1_i1	282	NA	NA	+	TRINITY_DN17453_c0_g1_i1	NA	NA	NA	CC	CC	CG	CG	CC	CC
	UTRINITY_DN1092_c0_g1_i1_2576	T/C	TRINITY_DN1092_c0_g1_i1	2576	NA	NA	+	TRINITY_DN1092_c0_g1_i1	NA	NA	NA	TC	TC	TT	TT	CC	CC
	UTRINITY_DN1092_c0_g1_i1_2578	A/C	TRINITY_DN1092_c0_g1_i1	2578	NA	NA	+	TRINITY_DN1092_c0_g1_i1	NA	NA	NA	AC	AC	AA	AA	CC	CC
	UTRINITY_DN1092_c0_g1_i1_2613	T/C	TRINITY_DN1092_c0_g1_i1	2613	NA	NA	+	TRINITY_DN1092_c0_g1_i1	NA	NA	NA	TT	TT	TT	TT	TC	TC
	UTRINITY_DN1092_c0_g1_i1_2621	G/A	TRINITY_DN1092_c0_g1_i1	2621	NA	NA	+	TRINITY_DN1092_c0_g1_i1	NA	NA	NA	AG	AG	AG	AG	GG	GG
	UTRINITY_DN1092_c0_g1_i1_2650	G/C	TRINITY_DN1092_c0_g1_i1	2650	NA	NA	+	TRINITY_DN1092_c0_g1_i1	NA	NA	NA	GG	GG	GG	GG	GC	GC
	UTRINITY_DN1092_c0_g1_i1_2683	C/G	TRINITY_DN1092_c0_g1_i1	2683	NA	NA	+	TRINITY_DN1092_c0_g1_i1	NA	NA	NA	GC	GC	GC	GC	CC	CC
	UTRINITY_DN1092_c0_g1_i1_2778	G/A	TRINITY_DN1092_c0_g1_i1	2778	NA	NA	+	TRINITY_DN1092_c0_g1_i1	NA	NA	NA	GG	GG	GG	GG	GA	GA
	UTRINITY_DN1092_c0_g1_i1_2798	G/A	TRINITY_DN1092_c0_g1_i1	2798	NA	NA	+	TRINITY_DN1092_c0_g1_i1	NA	NA	NA	GG	GG	GG	GG	GA	GA
	UTRINITY_DN1092_c0_g1_i1_2819	C/A	TRINITY_DN1092_c0_g1_i1	2819	NA	NA	+	TRINITY_DN1092_c0_g1_i1	NA	NA	NA	CC	CC	CC	CC	CA	CA
	UTRINITY_DN1092_c0_g1_i1_2840	G/A	TRINITY_DN1092_c0_g1_i1	2840	NA	NA	+	TRINITY_DN1092_c0_g1_i1	NA	NA	NA	GA	GA	GA	GA	GG	GG
	UTRINITY_DN1092_c0_g1_i1_2944	C/T	TRINITY_DN1092_c0_g1_i1	2944	NA	NA	+	TRINITY_DN1092_c0_g1_i1	NA	NA	NA	CC	CC	CC	CC	CT	CT
	UTRINITY_DN1092_c0_g1_i1_2986	G/A	TRINITY_DN1092_c0_g1_i1	2986	NA	NA	+	TRINITY_DN1092_c0_g1_i1	NA	NA	NA	GG	GG	GG	GG	GA	GA
	UTRINITY_DN1092_c0_g1_i1_2992	C/T	TRINITY_DN1092_c0_g1_i1	2992	NA	NA	+	TRINITY_DN1092_c0_g1_i1	NA	NA	NA	CT	CT	CT	CT	CC	CC
	UTRINITY_DN1092_c0_g1_i1_2993	T/C	TRINITY_DN1092_c0_g1_i1	2993	NA	NA	+	TRINITY_DN1092_c0_g1_i1	NA	NA	NA	TC	TC	TC	TC	TT	TT
	UTRINITY_DN1092_c0_g1_i1_3129	C/T	TRINITY_DN1092_c0_g1_i1	3129	NA	NA	+	TRINITY_DN1092_c0_g1_i1	NA	NA	NA	CC	CC	CC	CC	CT	CT
	UTRINITY_DN1092_c0_g1_i1_3146	C/A	TRINITY_DN1092_c0_g1_i1	3146	NA	NA	+	TRINITY_DN1092_c0_g1_i1	NA	NA	NA	CA	CA	CA	CA	CC	CC
	UTRINITY_DN1092_c0_g1_i1_3202	G/A	TRINITY_DN1092_c0_g1_i1	3202	NA	NA	+	TRINITY_DN1092_c0_g1_i1	NA	NA	NA	GG	GG	GG	GG	GA	GA
	UTRINITY_DN1092_c0_g1_i1_3205	G/T	TRINITY_DN1092_c0_g1_i1	3205	NA	NA	+	TRINITY_DN1092_c0_g1_i1	NA	NA	NA	GT	GT	GT	GT	GG	GG
	UTRINITY_DN1092_c0_g1_i1_3253	G/A	TRINITY_DN1092_c0_g1_i1	3253	NA	NA	+	TRINITY_DN1092_c0_g1_i1	NA	NA	NA	GA	GA	GA	GA	GG	GG
	UTRINITY_DN1092_c0_g1_i1_3345	A/C	TRINITY_DN1092_c0_g1_i1	3345	NA	NA	+	TRINITY_DN1092_c0_g1_i1	NA	NA	NA	AA	AA	AA	AA	AC	AC
	UTRINITY_DN1092_c0_g1_i1_3468	G/C	TRINITY_DN1092_c0_g1_i1	3468	NA	NA	+	TRINITY_DN1092_c0_g1_i1	NA	NA	NA	GC	GC	GG	GG	GC	GC
	UTRINITY_DN1092_c0_g1_i1_3475	A/K	TRINITY_DN1092_c0_g1_i1	3475	NA	NA	+	TRINITY_DN1092_c0_g1_i1	NA	NA	NA	AT	AT	AT	AT	AG	AG
	UTRINITY_DN1092_c0_g1_i1_3478	G/T	TRINITY_DN1092_c0_g1_i1	3478	NA	NA	+	TRINITY_DN1092_c0_g1_i1	NA	NA	NA	GG	GG	GG	GG	GT	GT
	UTRINITY_DN1092_c0_g1_i1_3483	C/A	TRINITY_DN1092_c0_g1_i1	3483	NA	NA	+	TRINITY_DN1092_c0_g1_i1	NA	NA	NA	CA	CA	CA	CA	CC	CC
	UTRINITY_DN1092_c0_g1_i1_3569	C/T	TRINITY_DN1092_c0_g1_i1	3569	NA	NA	+	TRINITY_DN1092_c0_g1_i1	NA	NA	NA	CC	CC	CC	CC	CT	CT
	UTRINITY_DN5970_c0_g2_i2_869	A/G	TRINITY_DN5970_c0_g2_i2	869	NA	NA	+	TRINITY_DN5970_c0_g2_i2	NA	NA	NA	AA	AA	AA	AA	GG	GG
	UTRINITY_DN5939_c2_g2_i2_146	C/T	TRINITY_DN5939_c2_g2_i2	146	NA	NA	+	TRINITY_DN5939_c2_g2_i2	NA	NA	NA	CC	CC	CC	CC	TT	TT
	UTRINITY_DN40636_c0_g2_i1_329	G/A	TRINITY_DN40636_c0_g2_i1	329	NA	NA	+	TRINITY_DN40636_c0_g2_i1	NA	NA	NA	GG	GG	GG	GG	AA	AA
	UTRINITY_DN40636_c0_g2_i1_463	A/G	TRINITY_DN40636_c0_g2_i1	463	NA	NA	+	TRINITY_DN40636_c0_g2_i1	NA	NA	NA	AA	AA	AA	AA	GG	GG
	UTRINITY_DN35339_c0_g1_i1_115	C/T	TRINITY_DN35339_c0_g1_i1	115	NA	NA	+	TRINITY_DN35339_c0_g1_i1	NA	NA	NA	CC	CC	CT	CT	CC	CC
	UTRINITY_DN9813_c0_g1_i5_1140	C/T	TRINITY_DN9813_c0_g1_i5	1140	NA	NA	+	TRINITY_DN9813_c0_g1_i5	NA	NA	NA	CC	CC	CT	CT	CT	CT
	UTRINITY_DN9813_c0_g1_i5_1147	T/C	TRINITY_DN9813_c0_g1_i5	1147	NA	NA	+	TRINITY_DN9813_c0_g1_i5	NA	NA	NA	TT	TT	TT	TT	TC	TC
	UTRINITY_DN5505_c1_g1_i6_851	G/A	TRINITY_DN5505_c1_g1_i6	851	NA	NA	+	TRINITY_DN5505_c1_g1_i6	NA	NA	NA	AA	AA	GG	GG	GG	GG
	UTRINITY_DN367_c0_g1_i2_1789	G/A	TRINITY_DN367_c0_g1_i2	1789	NA	NA	+	TRINITY_DN367_c0_g1_i2	NA	NA	NA	GG	GG	GG	GG	AA	AA
	UTRINITY_DN27227_c0_g1_i6_395	G/C	TRINITY_DN27227_c0_g1_i6	395	NA	NA	+	TRINITY_DN27227_c0_g1_i6	NA	NA	NA	CC	CC	GG	GG	GG	GG
	UTRINITY_DN61614_c0_g1_i1_131	C/T	TRINITY_DN61614_c0_g1_i1	131	NA	NA	+	TRINITY_DN61614_c0_g1_i1	NA	NA	NA	CC	CC	CC	CC	TT	TT
	UTRINITY_DN12450_c1_g1_i3_565	T/C	TRINITY_DN12450_c1_g1_i3	565	NA	NA	+	TRINITY_DN12450_c1_g1_i3	NA	NA	NA	TT	TT	TT	TT	CC	CC
	UTRINITY_DN12450_c1_g1_i3_599	A/G	TRINITY_DN12450_c1_g1_i3	599	NA	NA	+	TRINITY_DN12450_c1_g1_i3	NA	NA	NA	AA	AA	AA	AA	GG	GG
	UTRINITY_DN12450_c1_g1_i3_641	A/G	TRINITY_DN12450_c1_g1_i3	641	NA	NA	+	TRINITY_DN12450_c1_g1_i3	NA	NA	NA	AA	AA	AA	AA	GG	GG
	UTRINITY_DN5484_c0_g1_i3_2833	A/G	TRINITY_DN5484_c0_g1_i3	2833	NA	NA	+	TRINITY_DN5484_c0_g1_i3	NA	NA	NA	GG	GG	AA	AA	AA	AA
	UTRINITY_DN55644_c0_g1_i3_89	T/G	TRINITY_DN55644_c0_g1_i3	89	NA	NA	+	TRINITY_DN55644_c0_g1_i3	NA	NA	NA	TT	TT	TT	TT	GG	GG
	UTRINITY_DN55644_c0_g1_i3_93	C/G	TRINITY_DN55644_c0_g1_i3	93	NA	NA	+	TRINITY_DN55644_c0_g1_i3	NA	NA	NA	CC	CC	CC	CC	GG	GG
	UTRINITY_DN925_c0_g1_i4_63	G/A	TRINITY_DN925_c0_g1_i4	63	NA	NA	+	TRINITY_DN925_c0_g1_i4	NA	NA	NA	AG	AG	AG	AG	GG	GG
	UTRINITY_DN925_c0_g1_i4_206	G/A	TRINITY_DN925_c0_g1_i4	206	NA	NA	+	TRINITY_DN925_c0_g1_i4	NA	NA	NA	GG	GG	GA	GA	GG	GG
	UTRINITY_DN3488_c1_g1_i1_2113	A/G	TRINITY_DN3488_c1_g1_i1	2113	NA	NA	+	TRINITY_DN3488_c1_g1_i1	NA	NA	NA	AA	AA	AG	AG	AA	AA
	UTRINITY_DN4776_c0_g4_i1_267	G/C	TRINITY_DN4776_c0_g4_i1	267	NA	NA	+	TRINITY_DN4776_c0_g4_i1	NA	NA	NA	GC	GC	GG	GG	GG	GG
	UTRINITY_DN4234_c0_g1_i5_2137	T/C	TRINITY_DN4234_c0_g1_i5	2137	NA	NA	+	TRINITY_DN4234_c0_g1_i5	NA	NA	NA	TT	TT	TT	TT	CC	CC
	UTRINITY_DN4234_c0_g1_i5_2914	T/C	TRINITY_DN4234_c0_g1_i5	2914	NA	NA	+	TRINITY_DN4234_c0_g1_i5	NA	NA	NA	TC	TC	TT	TT	TT	TT
	UTRINITY_DN34091_c0_g1_i3_114	A/C	TRINITY_DN34091_c0_g1_i3	114	NA	NA	+	TRINITY_DN34091_c0_g1_i3	NA	NA	NA	AA	AA	AA	AA	CC	CC
	UTRINITY_DN55997_c0_g1_i2_113	G/A	TRINITY_DN55997_c0_g1_i2	113	NA	NA	+	TRINITY_DN55997_c0_g1_i2	NA	NA	NA	GG	GG	GG	GG	AA	AA
	UTRINITY_DN941_c0_g1_i1_71	A/T	TRINITY_DN941_c0_g1_i1	71	NA	NA	+	TRINITY_DN941_c0_g1_i1	NA	NA	NA	AA	AA	AA	AA	TT	TT
	UTRINITY_DN941_c0_g1_i1_542	G/C	TRINITY_DN941_c0_g1_i1	542	NA	NA	+	TRINITY_DN941_c0_g1_i1	NA	NA	NA	GG	GG	GG	GG	CC	CC
	UTRINITY_DN4002_c0_g2_i3_1148	C/T	TRINITY_DN4002_c0_g2_i3	1148	NA	NA	+	TRINITY_DN4002_c0_g2_i3	NA	NA	NA	CC	CC	CC	CC	TT	TT
	UTRINITY_DN4002_c0_g2_i3_1593	A/G	TRINITY_DN4002_c0_g2_i3	1593	NA	NA	+	TRINITY_DN4002_c0_g2_i3	NA	NA	NA	AA	AA	AA	AA	AG	AG
	UTRINITY_DN31669_c0_g2_i1_131	C/T	TRINITY_DN31669_c0_g2_i1	131	NA	NA	+	TRINITY_DN31669_c0_g2_i1	NA	NA	NA	CT	CT	CT	CT	CC	CC
	UTRINITY_DN31669_c0_g2_i1_156	C/A	TRINITY_DN31669_c0_g2_i1	156	NA	NA	+	TRINITY_DN31669_c0_g2_i1	NA	NA	NA	CC	CC	CC	CC	CA	CA
	UTRINITY_DN31669_c0_g2_i1_163	A/C	TRINITY_DN31669_c0_g2_i1	163	NA	NA	+	TRINITY_DN31669_c0_g2_i1	NA	NA	NA	CA	CA	CC	CC	AA	AA
	UTRINITY_DN31669_c0_g2_i1_288	G/A	TRINITY_DN31669_c0_g2_i1	288	NA	NA	+	TRINITY_DN31669_c0_g2_i1	NA	NA	NA	GA	GA	GA	GA	GG	GG
	UTRINITY_DN31669_c0_g2_i1_304	C/T	TRINITY_DN31669_c0_g2_i1	304	NA	NA	+	TRINITY_DN31669_c0_g2_i1	NA	NA	NA	CT	CT	CT	CT	CC	CC
	UTRINITY_DN31669_c0_g2_i1_397	T/C	TRINITY_DN31669_c0_g2_i1	397	NA	NA	+	TRINITY_DN31669_c0_g2_i1	NA	NA	NA	TT	TT	TT	TT	TC	TC
	UTRINITY_DN31669_c0_g2_i1_457	G/A	TRINITY_DN31669_c0_g2_i1	457	NA	NA	+	TRINITY_DN31669_c0_g2_i1	NA	NA	NA	GG	GG	GG	GG	AA	AA
	UTRINITY_DN31669_c0_g2_i1_487	A/G	TRINITY_DN31669_c0_g2_i1	487	NA	NA	+	TRINITY_DN31669_c0_g2_i1	NA	NA	NA	AA	AA	AA	AA	GG	GG
	UTRINITY_DN31669_c0_g2_i1_488	C/T	TRINITY_DN31669_c0_g2_i1	488	NA	NA	+	TRINITY_DN31669_c0_g2_i1	NA	NA	NA	CC	CC	CC	CC	TT	TT
	UTRINITY_DN31669_c0_g2_i1_528	C/T	TRINITY_DN31669_c0_g2_i1	528	NA	NA	+	TRINITY_DN31669_c0_g2_i1	NA	NA	NA	CC	CC	CC	CC	TT	TT
	UTRINITY_DN31669_c0_g2_i1_560	C/T	TRINITY_DN31669_c0_g2_i1	560	NA	NA	+	TRINITY_DN31669_c0_g2_i1	NA	NA	NA	CC	CC	CC	CC	TT	TT
	UTRINITY_DN31669_c0_g2_i1_579	G/C	TRINITY_DN31669_c0_g2_i1	579	NA	NA	+	TRINITY_DN31669_c0_g2_i1	NA	NA	NA	GG	GG	GG	GG	CC	CC
	UTRINITY_DN42234_c0_g1_i1_135	T/C	TRINITY_DN42234_c0_g1_i1	135	NA	NA	+	TRINITY_DN42234_c0_g1_i1	NA	NA	NA	TT	TT	TT	TT	TC	TC
	UTRINITY_DN42234_c0_g1_i1_136	G/A	TRINITY_DN42234_c0_g1_i1	136	NA	NA	+	TRINITY_DN42234_c0_g1_i1	NA	NA	NA	GG	GG	GG	GG	GA	GA
	UTRINITY_DN52793_c0_g1_i4_77	A/G	TRINITY_DN52793_c0_g1_i4	77	NA	NA	+	TRINITY_DN52793_c0_g1_i4	NA	NA	NA	AA	AA	AA	AA	GG	GG
	UTRINITY_DN5638_c0_g1_i7_865	G/A	TRINITY_DN5638_c0_g1_i7	865	NA	NA	+	TRINITY_DN5638_c0_g1_i7	NA	NA	NA	GG	GG	GG	GG	AA	AA
	UTRINITY_DN5638_c0_g1_i7_901	C/T	TRINITY_DN5638_c0_g1_i7	901	NA	NA	+	TRINITY_DN5638_c0_g1_i7	NA	NA	NA	CC	CC	CC	CC	TT	TT
	UTRINITY_DN35795_c1_g1_i1_414	G/A	TRINITY_DN35795_c1_g1_i1	414	NA	NA	+	TRINITY_DN35795_c1_g1_i1	NA	NA	NA	GG	GG	GG	GG	AA	AA
	UTRINITY_DN6568_c0_g1_i2_2907	G/C	TRINITY_DN6568_c0_g1_i2	2907	NA	NA	+	TRINITY_DN6568_c0_g1_i2	NA	NA	NA	GG	GG	GG	GG	CC	CC
	UTRINITY_DN10998_c0_g1_i5_2338	C/T	TRINITY_DN10998_c0_g1_i5	2338	NA	NA	+	TRINITY_DN10998_c0_g1_i5	NA	NA	NA	CC	CC	CC	CC	TT	TT
	UTRINITY_DN10998_c0_g1_i5_2347	T/A	TRINITY_DN10998_c0_g1_i5	2347	NA	NA	+	TRINITY_DN10998_c0_g1_i5	NA	NA	NA	TA	TA	TA	TA	TT	TT
	UTRINITY_DN10998_c0_g1_i5_2446	G/A	TRINITY_DN10998_c0_g1_i5	2446	NA	NA	+	TRINITY_DN10998_c0_g1_i5	NA	NA	NA	GA	GA	GG	GG	GG	GG
	UTRINITY_DN10998_c0_g1_i5_2558	A/G	TRINITY_DN10998_c0_g1_i5	2558	NA	NA	+	TRINITY_DN10998_c0_g1_i5	NA	NA	NA	AG	AG	AG	AG	AA	AA
	UTRINITY_DN10998_c0_g1_i5_2561	C/T	TRINITY_DN10998_c0_g1_i5	2561	NA	NA	+	TRINITY_DN10998_c0_g1_i5	NA	NA	NA	CT	CT	CT	CT	CC	CC
	UTRINITY_DN10998_c0_g1_i5_2584	T/C	TRINITY_DN10998_c0_g1_i5	2584	NA	NA	+	TRINITY_DN10998_c0_g1_i5	NA	NA	NA	TC	TC	TC	TC	TT	TT
	UTRINITY_DN10998_c0_g1_i5_2619	G/T	TRINITY_DN10998_c0_g1_i5	2619	NA	NA	+	TRINITY_DN10998_c0_g1_i5	NA	NA	NA	GT	GT	GT	GT	GG	GG
	UTRINITY_DN10998_c0_g1_i5_2649	T/C	TRINITY_DN10998_c0_g1_i5	2649	NA	NA	+	TRINITY_DN10998_c0_g1_i5	NA	NA	NA	TC	TC	TC	TC	TT	TT
	UTRINITY_DN22015_c0_g1_i1_23	C/T	TRINITY_DN22015_c0_g1_i1	23	NA	NA	+	TRINITY_DN22015_c0_g1_i1	NA	NA	NA	CC	CC	CC	CC	TT	TT
	UTRINITY_DN22015_c0_g1_i1_47	T/C	TRINITY_DN22015_c0_g1_i1	47	NA	NA	+	TRINITY_DN22015_c0_g1_i1	NA	NA	NA	TT	TT	TT	TT	CC	CC
	UTRINITY_DN12895_c0_g1_i11_226	T/C	TRINITY_DN12895_c0_g1_i11	226	NA	NA	+	TRINITY_DN12895_c0_g1_i11	NA	NA	NA	CC	CC	TT	TT	TT	TT
	UTRINITY_DN4382_c0_g1_i8_544	C/T	TRINITY_DN4382_c0_g1_i8	544	NA	NA	+	TRINITY_DN4382_c0_g1_i8	NA	NA	NA	CT	CT	CC	CC	CC	CC
	UTRINITY_DN335_c0_g1_i2_1287	T/A	TRINITY_DN335_c0_g1_i2	1287	NA	NA	+	TRINITY_DN335_c0_g1_i2	NA	NA	NA	TT	TT	AA	AA	TT	TT
	UTRINITY_DN335_c0_g1_i2_1296	C/T	TRINITY_DN335_c0_g1_i2	1296	NA	NA	+	TRINITY_DN335_c0_g1_i2	NA	NA	NA	CC	CC	TT	TT	CC	CC
	UTRINITY_DN6257_c0_g1_i4_449	A/C	TRINITY_DN6257_c0_g1_i4	449	NA	NA	+	TRINITY_DN6257_c0_g1_i4	NA	NA	NA	AC	AC	AC	AC	AA	AA
	UTRINITY_DN6257_c0_g1_i4_575	C/T	TRINITY_DN6257_c0_g1_i4	575	NA	NA	+	TRINITY_DN6257_c0_g1_i4	NA	NA	NA	CC	CC	CC	CC	CT	CT
	UTRINITY_DN6257_c0_g1_i4_815	G/A	TRINITY_DN6257_c0_g1_i4	815	NA	NA	+	TRINITY_DN6257_c0_g1_i4	NA	NA	NA	GG	GG	GA	GA	GG	GG
	UTRINITY_DN6257_c0_g1_i4_869	G/A	TRINITY_DN6257_c0_g1_i4	869	NA	NA	+	TRINITY_DN6257_c0_g1_i4	NA	NA	NA	GG	GG	GG	GG	AA	AA
	UTRINITY_DN6257_c0_g1_i4_1018	G/A	TRINITY_DN6257_c0_g1_i4	1018	NA	NA	+	TRINITY_DN6257_c0_g1_i4	NA	NA	NA	GG	GG	GG	GG	GA	GA
	UTRINITY_DN6257_c0_g1_i4_1043	C/G	TRINITY_DN6257_c0_g1_i4	1043	NA	NA	+	TRINITY_DN6257_c0_g1_i4	NA	NA	NA	CC	CC	CC	CC	CG	CG
	UTRINITY_DN6257_c0_g1_i4_1108	G/C	TRINITY_DN6257_c0_g1_i4	1108	NA	NA	+	TRINITY_DN6257_c0_g1_i4	NA	NA	NA	GG	GG	GG	GG	GC	GC
	UTRINITY_DN6257_c0_g1_i4_1118	G/C	TRINITY_DN6257_c0_g1_i4	1118	NA	NA	+	TRINITY_DN6257_c0_g1_i4	NA	NA	NA	GG	GG	GG	GG	CC	CC
	UTRINITY_DN6257_c0_g1_i4_1120	G/C	TRINITY_DN6257_c0_g1_i4	1120	NA	NA	+	TRINITY_DN6257_c0_g1_i4	NA	NA	NA	GG	GG	GG	GG	CC	CC
	UTRINITY_DN6257_c0_g1_i4_1122	A/C	TRINITY_DN6257_c0_g1_i4	1122	NA	NA	+	TRINITY_DN6257_c0_g1_i4	NA	NA	NA	AA	AA	AA	AA	AC	AC
	UTRINITY_DN6257_c0_g1_i4_1169	A/G	TRINITY_DN6257_c0_g1_i4	1169	NA	NA	+	TRINITY_DN6257_c0_g1_i4	NA	NA	NA	AA	AA	AA	AA	GG	GG
	UTRINITY_DN6257_c0_g1_i4_1228	G/T	TRINITY_DN6257_c0_g1_i4	1228	NA	NA	+	TRINITY_DN6257_c0_g1_i4	NA	NA	NA	GG	GG	GG	GG	TT	TT
	UTRINITY_DN6257_c0_g1_i4_1230	C/A	TRINITY_DN6257_c0_g1_i4	1230	NA	NA	+	TRINITY_DN6257_c0_g1_i4	NA	NA	NA	CC	CC	CC	CC	AA	AA
	UTRINITY_DN6257_c0_g1_i4_1264	T/C	TRINITY_DN6257_c0_g1_i4	1264	NA	NA	+	TRINITY_DN6257_c0_g1_i4	NA	NA	NA	TC	TC	TC	TC	TT	TT
	UTRINITY_DN6257_c0_g1_i4_1293	A/G	TRINITY_DN6257_c0_g1_i4	1293	NA	NA	+	TRINITY_DN6257_c0_g1_i4	NA	NA	NA	AA	AA	AG	AG	AA	AA
	UTRINITY_DN6257_c0_g1_i4_1482	C/G	TRINITY_DN6257_c0_g1_i4	1482	NA	NA	+	TRINITY_DN6257_c0_g1_i4	NA	NA	NA	CG	CG	CC	CC	CC	CC
	UTRINITY_DN70741_c0_g6_i1_180	C/A	TRINITY_DN70741_c0_g6_i1	180	NA	NA	+	TRINITY_DN70741_c0_g6_i1	NA	NA	NA	CC	CC	AA	AA	CC	CC
	UTRINITY_DN8206_c0_g1_i4_445	T/C	TRINITY_DN8206_c0_g1_i4	445	NA	NA	+	TRINITY_DN8206_c0_g1_i4	NA	NA	NA	TT	TT	TT	TT	CC	CC
	UTRINITY_DN2758_c0_g1_i1_305	A/T	TRINITY_DN2758_c0_g1_i1	305	NA	NA	+	TRINITY_DN2758_c0_g1_i1	NA	NA	NA	TT	TT	AA	AA	AA	AA
	UTRINITY_DN9023_c0_g1_i1_496	C/T	TRINITY_DN9023_c0_g1_i1	496	NA	NA	+	TRINITY_DN9023_c0_g1_i1	NA	NA	NA	CC	CC	CC	CC	TT	TT
	UTRINITY_DN9939_c0_g1_i8_4479	C/T	TRINITY_DN9939_c0_g1_i8	4479	NA	NA	+	TRINITY_DN9939_c0_g1_i8	NA	NA	NA	TT	TT	CC	CC	CC	CC
	UTRINITY_DN50235_c0_g1_i1_702	C/A	TRINITY_DN50235_c0_g1_i1	702	NA	NA	+	TRINITY_DN50235_c0_g1_i1	NA	NA	NA	CC	CC	AA	AA	CC	CC
	UTRINITY_DN1263_c0_g1_i3_2001	T/C	TRINITY_DN1263_c0_g1_i3	2001	NA	NA	+	TRINITY_DN1263_c0_g1_i3	NA	NA	NA	TT	TT	CC	CC	TT	TT
	UTRINITY_DN2624_c0_g1_i4_4677	A/G	TRINITY_DN2624_c0_g1_i4	4677	NA	NA	+	TRINITY_DN2624_c0_g1_i4	NA	NA	NA	GA	GA	GA	GA	AA	AA
	UTRINITY_DN2624_c0_g1_i4_4681	G/A	TRINITY_DN2624_c0_g1_i4	4681	NA	NA	+	TRINITY_DN2624_c0_g1_i4	NA	NA	NA	AG	AG	AG	AG	GG	GG
	UTRINITY_DN2624_c0_g1_i4_4737	C/T	TRINITY_DN2624_c0_g1_i4	4737	NA	NA	+	TRINITY_DN2624_c0_g1_i4	NA	NA	NA	CC	CC	CC	CC	CT	CT
	UTRINITY_DN124_c1_g1_i1_912	G/A	TRINITY_DN124_c1_g1_i1	912	NA	NA	+	TRINITY_DN124_c1_g1_i1	NA	NA	NA	GG	GG	GA	GA	GA	GA
	UTRINITY_DN4472_c2_g1_i1_557	A/G	TRINITY_DN4472_c2_g1_i1	557	NA	NA	+	TRINITY_DN4472_c2_g1_i1	NA	NA	NA	AA	AA	AA	AA	AG	AG
	UTRINITY_DN943_c0_g2_i2_802	A/G	TRINITY_DN943_c0_g2_i2	802	NA	NA	+	TRINITY_DN943_c0_g2_i2	NA	NA	NA	AA	AA	AA	AA	GG	GG
	UTRINITY_DN943_c0_g2_i2_815	G/C	TRINITY_DN943_c0_g2_i2	815	NA	NA	+	TRINITY_DN943_c0_g2_i2	NA	NA	NA	GG	GG	GG	GG	CC	CC
	UTRINITY_DN943_c0_g2_i2_911	G/T	TRINITY_DN943_c0_g2_i2	911	NA	NA	+	TRINITY_DN943_c0_g2_i2	NA	NA	NA	TT	TT	GG	GG	GG	GG
	UTRINITY_DN15812_c1_g1_i2_270	C/G	TRINITY_DN15812_c1_g1_i2	270	NA	NA	+	TRINITY_DN15812_c1_g1_i2	NA	NA	NA	GG	GG	CC	CC	CC	CC
	UTRINITY_DN5755_c2_g1_i1_187	G/C	TRINITY_DN5755_c2_g1_i1	187	NA	NA	+	TRINITY_DN5755_c2_g1_i1	NA	NA	NA	GG	GG	GG	GG	CC	CC
	UTRINITY_DN13146_c0_g1_i2_57	C/G	TRINITY_DN13146_c0_g1_i2	57	NA	NA	+	TRINITY_DN13146_c0_g1_i2	NA	NA	NA	CC	CC	CC	CC	GG	GG
	UTRINITY_DN13146_c0_g1_i2_160	T/A	TRINITY_DN13146_c0_g1_i2	160	NA	NA	+	TRINITY_DN13146_c0_g1_i2	NA	NA	NA	AA	AA	TT	TT	TT	TT
	UTRINITY_DN13146_c0_g1_i2_164	A/G	TRINITY_DN13146_c0_g1_i2	164	NA	NA	+	TRINITY_DN13146_c0_g1_i2	NA	NA	NA	GG	GG	AA	AA	AA	AA
	UTRINITY_DN13146_c0_g1_i2_165	T/G	TRINITY_DN13146_c0_g1_i2	165	NA	NA	+	TRINITY_DN13146_c0_g1_i2	NA	NA	NA	GG	GG	TT	TT	TT	TT
	UTRINITY_DN9463_c0_g1_i7_3519	T/C	TRINITY_DN9463_c0_g1_i7	3519	NA	NA	+	TRINITY_DN9463_c0_g1_i7	NA	NA	NA	TT	TT	CC	CC	TT	TT
	UTRINITY_DN723_c0_g1_i4_616	A/G	TRINITY_DN723_c0_g1_i4	616	NA	NA	+	TRINITY_DN723_c0_g1_i4	NA	NA	NA	AA	AA	AA	AA	GG	GG
	UTRINITY_DN5016_c0_g1_i2_559	C/T	TRINITY_DN5016_c0_g1_i2	559	NA	NA	+	TRINITY_DN5016_c0_g1_i2	NA	NA	NA	CC	CC	TC	TC	TC	TC
	UTRINITY_DN5016_c0_g1_i2_639	A/G	TRINITY_DN5016_c0_g1_i2	639	NA	NA	+	TRINITY_DN5016_c0_g1_i2	NA	NA	NA	AA	AA	AG	AG	AG	AG
	UTRINITY_DN5016_c0_g1_i2_659	A/T	TRINITY_DN5016_c0_g1_i2	659	NA	NA	+	TRINITY_DN5016_c0_g1_i2	NA	NA	NA	AA	AA	AT	AT	AT	AT
	UTRINITY_DN31897_c0_g1_i1_112	T/C	TRINITY_DN31897_c0_g1_i1	112	NA	NA	+	TRINITY_DN31897_c0_g1_i1	NA	NA	NA	CT	CT	CC	CC	TT	TT
	UTRINITY_DN21118_c0_g1_i1_52	C/T	TRINITY_DN21118_c0_g1_i1	52	NA	NA	+	TRINITY_DN21118_c0_g1_i1	NA	NA	NA	CC	CC	CC	CC	TT	TT
	UTRINITY_DN21118_c0_g1_i1_77	T/C	TRINITY_DN21118_c0_g1_i1	77	NA	NA	+	TRINITY_DN21118_c0_g1_i1	NA	NA	NA	TT	TT	TT	TT	TC	TC
	UTRINITY_DN117250_c0_g2_i2_175	G/C	TRINITY_DN117250_c0_g2_i2	175	NA	NA	+	TRINITY_DN117250_c0_g2_i2	NA	NA	NA	GG	GG	GG	GG	CC	CC
	UTRINITY_DN4243_c1_g1_i12_368	T/C	TRINITY_DN4243_c1_g1_i12	368	NA	NA	+	TRINITY_DN4243_c1_g1_i12	NA	NA	NA	TT	TT	TT	TT	CC	CC
	UTRINITY_DN2777_c0_g2_i1_1119	T/C	TRINITY_DN2777_c0_g2_i1	1119	NA	NA	+	TRINITY_DN2777_c0_g2_i1	NA	NA	NA	TC	TC	TT	TT	TT	TT
	UTRINITY_DN2777_c0_g2_i1_1126	T/C	TRINITY_DN2777_c0_g2_i1	1126	NA	NA	+	TRINITY_DN2777_c0_g2_i1	NA	NA	NA	TC	TC	TT	TT	TT	TT
	UTRINITY_DN2777_c0_g2_i1_1141	T/C	TRINITY_DN2777_c0_g2_i1	1141	NA	NA	+	TRINITY_DN2777_c0_g2_i1	NA	NA	NA	TC	TC	TT	TT	TT	TT
	UTRINITY_DN2777_c0_g2_i1_1158	T/C	TRINITY_DN2777_c0_g2_i1	1158	NA	NA	+	TRINITY_DN2777_c0_g2_i1	NA	NA	NA	TC	TC	TT	TT	TT	TT
	UTRINITY_DN2777_c0_g2_i1_1162	T/C	TRINITY_DN2777_c0_g2_i1	1162	NA	NA	+	TRINITY_DN2777_c0_g2_i1	NA	NA	NA	TC	TC	TT	TT	TT	TT
	UTRINITY_DN13547_c0_g1_i8_142	C/T	TRINITY_DN13547_c0_g1_i8	142	NA	NA	+	TRINITY_DN13547_c0_g1_i8	NA	NA	NA	CC	CC	CC	CC	TT	TT
	UTRINITY_DN54459_c0_g2_i4_762	A/G	TRINITY_DN54459_c0_g2_i4	762	NA	NA	+	TRINITY_DN54459_c0_g2_i4	NA	NA	NA	AA	AA	GG	GG	AA	AA
	UTRINITY_DN12068_c0_g1_i1_102	T/G	TRINITY_DN12068_c0_g1_i1	102	NA	NA	+	TRINITY_DN12068_c0_g1_i1	NA	NA	NA	TG	TG	TG	TG	TT	TT
	UTRINITY_DN13459_c0_g1_i7_11344	A/G	TRINITY_DN13459_c0_g1_i7	11344	NA	NA	+	TRINITY_DN13459_c0_g1_i7	NA	NA	NA	AA	AA	AA	AA	GG	GG
	UTRINITY_DN13459_c0_g1_i7_11461	T/G	TRINITY_DN13459_c0_g1_i7	11461	NA	NA	+	TRINITY_DN13459_c0_g1_i7	NA	NA	NA	TT	TT	TT	TT	GT	GT
	UTRINITY_DN23012_c0_g1_i15_333	C/G	TRINITY_DN23012_c0_g1_i15	333	NA	NA	+	TRINITY_DN23012_c0_g1_i15	NA	NA	NA	CC	CC	CG	CG	CC	CC
	UTRINITY_DN23012_c0_g1_i15_368	T/C	TRINITY_DN23012_c0_g1_i15	368	NA	NA	+	TRINITY_DN23012_c0_g1_i15	NA	NA	NA	TT	TT	TC	TC	TT	TT
	UTRINITY_DN23012_c0_g1_i15_390	G/A	TRINITY_DN23012_c0_g1_i15	390	NA	NA	+	TRINITY_DN23012_c0_g1_i15	NA	NA	NA	GG	GG	GA	GA	GG	GG
	UTRINITY_DN19770_c0_g1_i3_1212	T/G	TRINITY_DN19770_c0_g1_i3	1212	NA	NA	+	TRINITY_DN19770_c0_g1_i3	NA	NA	NA	TT	TT	GG	GG	TT	TT
	UTRINITY_DN19770_c0_g1_i3_1217	G/A	TRINITY_DN19770_c0_g1_i3	1217	NA	NA	+	TRINITY_DN19770_c0_g1_i3	NA	NA	NA	GG	GG	AA	AA	GG	GG
	UTRINITY_DN19770_c0_g1_i3_1220	G/C	TRINITY_DN19770_c0_g1_i3	1220	NA	NA	+	TRINITY_DN19770_c0_g1_i3	NA	NA	NA	GG	GG	CC	CC	GG	GG
	UTRINITY_DN5910_c0_g1_i3_571	T/C	TRINITY_DN5910_c0_g1_i3	571	NA	NA	+	TRINITY_DN5910_c0_g1_i3	NA	NA	NA	TT	TT	TT	TT	CC	CC
	UTRINITY_DN923_c0_g2_i6_627	G/A	TRINITY_DN923_c0_g2_i6	627	NA	NA	+	TRINITY_DN923_c0_g2_i6	NA	NA	NA	GG	GG	AA	AA	GG	GG
	UTRINITY_DN923_c0_g2_i6_640	A/G	TRINITY_DN923_c0_g2_i6	640	NA	NA	+	TRINITY_DN923_c0_g2_i6	NA	NA	NA	AA	AA	GG	GG	AA	AA
	UTRINITY_DN33519_c0_g1_i1_453	T/C	TRINITY_DN33519_c0_g1_i1	453	NA	NA	+	TRINITY_DN33519_c0_g1_i1	NA	NA	NA	--	--	TT	TT	CC	CC
	UTRINITY_DN20517_c3_g1_i1_560	C/A	TRINITY_DN20517_c3_g1_i1	560	NA	NA	+	TRINITY_DN20517_c3_g1_i1	NA	NA	NA	CC	CC	CA	CA	CA	CA
	UTRINITY_DN20517_c3_g1_i1_602	T/C	TRINITY_DN20517_c3_g1_i1	602	NA	NA	+	TRINITY_DN20517_c3_g1_i1	NA	NA	NA	TT	TT	TC	TC	TC	TC
	UTRINITY_DN20517_c3_g1_i1_668	A/C	TRINITY_DN20517_c3_g1_i1	668	NA	NA	+	TRINITY_DN20517_c3_g1_i1	NA	NA	NA	AA	AA	AC	AC	AA	AA
	UTRINITY_DN20517_c3_g1_i1_863	G/T	TRINITY_DN20517_c3_g1_i1	863	NA	NA	+	TRINITY_DN20517_c3_g1_i1	NA	NA	NA	GG	GG	GG	GG	GT	GT
	UTRINITY_DN20517_c3_g1_i1_917	G/A	TRINITY_DN20517_c3_g1_i1	917	NA	NA	+	TRINITY_DN20517_c3_g1_i1	NA	NA	NA	GG	GG	GA	GA	GA	GA
	UTRINITY_DN20517_c3_g1_i1_938	C/T	TRINITY_DN20517_c3_g1_i1	938	NA	NA	+	TRINITY_DN20517_c3_g1_i1	NA	NA	NA	CC	CC	CT	CT	CT	CT
	UTRINITY_DN20517_c3_g1_i1_1193	G/C	TRINITY_DN20517_c3_g1_i1	1193	NA	NA	+	TRINITY_DN20517_c3_g1_i1	NA	NA	NA	GG	GG	GC	GC	GG	GG
	UTRINITY_DN20517_c3_g1_i1_1196	T/C	TRINITY_DN20517_c3_g1_i1	1196	NA	NA	+	TRINITY_DN20517_c3_g1_i1	NA	NA	NA	TT	TT	TC	TC	TT	TT
	UTRINITY_DN67952_c0_g1_i1_249	T/C	TRINITY_DN67952_c0_g1_i1	249	NA	NA	+	TRINITY_DN67952_c0_g1_i1	NA	NA	NA	TC	TC	TT	TT	TT	TT
	UTRINITY_DN67952_c0_g1_i1_283	T/C	TRINITY_DN67952_c0_g1_i1	283	NA	NA	+	TRINITY_DN67952_c0_g1_i1	NA	NA	NA	TC	TC	TT	TT	TT	TT
	UTRINITY_DN19108_c0_g1_i10_154	T/G	TRINITY_DN19108_c0_g1_i10	154	NA	NA	+	TRINITY_DN19108_c0_g1_i10	NA	NA	NA	TT	TT	TT	TT	TG	TG
	UTRINITY_DN19108_c0_g1_i10_262	G/C	TRINITY_DN19108_c0_g1_i10	262	NA	NA	+	TRINITY_DN19108_c0_g1_i10	NA	NA	NA	GG	GG	GC	GC	GC	GC
	UTRINITY_DN19108_c0_g1_i10_545	G/T	TRINITY_DN19108_c0_g1_i10	545	NA	NA	+	TRINITY_DN19108_c0_g1_i10	NA	NA	NA	GG	GG	GG	GG	GT	GT
	UTRINITY_DN19108_c0_g1_i10_583	T/C	TRINITY_DN19108_c0_g1_i10	583	NA	NA	+	TRINITY_DN19108_c0_g1_i10	NA	NA	NA	TT	TT	TT	TT	TC	TC
	UTRINITY_DN19108_c0_g1_i10_596	C/T	TRINITY_DN19108_c0_g1_i10	596	NA	NA	+	TRINITY_DN19108_c0_g1_i10	NA	NA	NA	CC	CC	CT	CT	CT	CT
	UTRINITY_DN19108_c0_g1_i10_619	G/A	TRINITY_DN19108_c0_g1_i10	619	NA	NA	+	TRINITY_DN19108_c0_g1_i10	NA	NA	NA	GG	GG	GG	GG	GA	GA
	UTRINITY_DN2542_c0_g1_i1_533	C/G	TRINITY_DN2542_c0_g1_i1	533	NA	NA	+	TRINITY_DN2542_c0_g1_i1	NA	NA	NA	CC	CC	CC	CC	GG	GG
	UTRINITY_DN2542_c0_g1_i1_548	A/G	TRINITY_DN2542_c0_g1_i1	548	NA	NA	+	TRINITY_DN2542_c0_g1_i1	NA	NA	NA	AA	AA	GG	GG	AA	AA
	UTRINITY_DN539_c0_g1_i3_1823	C/T	TRINITY_DN539_c0_g1_i3	1823	NA	NA	+	TRINITY_DN539_c0_g1_i3	NA	NA	NA	TT	TT	CC	CC	CC	CC
	UTRINITY_DN9935_c0_g1_i2_4789	G/A	TRINITY_DN9935_c0_g1_i2	4789	NA	NA	+	TRINITY_DN9935_c0_g1_i2	NA	NA	NA	GA	GA	GA	GA	GG	GG
	UTRINITY_DN10500_c0_g1_i1_303	T/C	TRINITY_DN10500_c0_g1_i1	303	NA	NA	+	TRINITY_DN10500_c0_g1_i1	NA	NA	NA	TT	TT	TT	TT	CC	CC
	UTRINITY_DN14803_c0_g1_i1_156	G/T	TRINITY_DN14803_c0_g1_i1	156	NA	NA	+	TRINITY_DN14803_c0_g1_i1	NA	NA	NA	GG	GG	GG	GG	TT	TT
	UTRINITY_DN77412_c1_g1_i7_117	T/C	TRINITY_DN77412_c1_g1_i7	117	NA	NA	+	TRINITY_DN77412_c1_g1_i7	NA	NA	NA	TT	TT	CC	CC	TT	TT
	UTRINITY_DN19701_c0_g1_i1_380	A/G	TRINITY_DN19701_c0_g1_i1	380	NA	NA	+	TRINITY_DN19701_c0_g1_i1	NA	NA	NA	AA	AA	AA	AA	AG	AG
	UTRINITY_DN4355_c0_g1_i3_3971	C/A	TRINITY_DN4355_c0_g1_i3	3971	NA	NA	+	TRINITY_DN4355_c0_g1_i3	NA	NA	NA	CC	CC	CC	CC	AA	AA
	UTRINITY_DN4198_c1_g1_i2_72	C/T	TRINITY_DN4198_c1_g1_i2	72	NA	NA	+	TRINITY_DN4198_c1_g1_i2	NA	NA	NA	CC	CC	CC	CC	TT	TT
	UTRINITY_DN4198_c1_g1_i2_83	G/C	TRINITY_DN4198_c1_g1_i2	83	NA	NA	+	TRINITY_DN4198_c1_g1_i2	NA	NA	NA	GG	GG	GG	GG	CC	CC
	UTRINITY_DN230_c0_g1_i3_1309	T/C	TRINITY_DN230_c0_g1_i3	1309	NA	NA	+	TRINITY_DN230_c0_g1_i3	NA	NA	NA	TT	TT	CC	CC	TT	TT
	UTRINITY_DN13269_c0_g1_i8_196	G/C	TRINITY_DN13269_c0_g1_i8	196	NA	NA	+	TRINITY_DN13269_c0_g1_i8	NA	NA	NA	GG	GG	CC	CC	GG	GG
	UTRINITY_DN1309_c0_g1_i3_3397	G/A	TRINITY_DN1309_c0_g1_i3	3397	NA	NA	+	TRINITY_DN1309_c0_g1_i3	NA	NA	NA	GG	GG	AA	AA	GG	GG
	UTRINITY_DN12194_c0_g1_i4_1537	C/T	TRINITY_DN12194_c0_g1_i4	1537	NA	NA	+	TRINITY_DN12194_c0_g1_i4	NA	NA	NA	CC	CC	CC	CC	TT	TT
	UTRINITY_DN12194_c0_g1_i4_1547	T/C	TRINITY_DN12194_c0_g1_i4	1547	NA	NA	+	TRINITY_DN12194_c0_g1_i4	NA	NA	NA	TT	TT	TT	TT	CC	CC
	UTRINITY_DN12194_c0_g1_i4_1658	C/G	TRINITY_DN12194_c0_g1_i4	1658	NA	NA	+	TRINITY_DN12194_c0_g1_i4	NA	NA	NA	CC	CC	CC	CC	GG	GG
	UTRINITY_DN12194_c0_g1_i4_1692	G/A	TRINITY_DN12194_c0_g1_i4	1692	NA	NA	+	TRINITY_DN12194_c0_g1_i4	NA	NA	NA	GG	GG	GG	GG	AA	AA
	UTRINITY_DN12194_c0_g1_i4_1701	G/T	TRINITY_DN12194_c0_g1_i4	1701	NA	NA	+	TRINITY_DN12194_c0_g1_i4	NA	NA	NA	GG	GG	GG	GG	TT	TT
	UTRINITY_DN12194_c0_g1_i4_1722	T/C	TRINITY_DN12194_c0_g1_i4	1722	NA	NA	+	TRINITY_DN12194_c0_g1_i4	NA	NA	NA	TT	TT	TT	TT	CC	CC
	UTRINITY_DN16580_c0_g1_i7_965	A/C	TRINITY_DN16580_c0_g1_i7	965	NA	NA	+	TRINITY_DN16580_c0_g1_i7	NA	NA	NA	AA	AA	AA	AA	CC	CC
	UTRINITY_DN7664_c0_g1_i12_269	C/G	TRINITY_DN7664_c0_g1_i12	269	NA	NA	+	TRINITY_DN7664_c0_g1_i12	NA	NA	NA	CC	CC	GG	GG	CC	CC
	UTRINITY_DN13369_c0_g1_i2_1041	A/G	TRINITY_DN13369_c0_g1_i2	1041	NA	NA	+	TRINITY_DN13369_c0_g1_i2	NA	NA	NA	AA	AA	AA	AA	GG	GG
	UTRINITY_DN1547_c0_g1_i4_1967	T/C	TRINITY_DN1547_c0_g1_i4	1967	NA	NA	+	TRINITY_DN1547_c0_g1_i4	NA	NA	NA	TT	TT	TT	TT	CC	CC
	UTRINITY_DN1547_c0_g1_i4_2006	C/T	TRINITY_DN1547_c0_g1_i4	2006	NA	NA	+	TRINITY_DN1547_c0_g1_i4	NA	NA	NA	CC	CC	CC	CC	TT	TT
	UTRINITY_DN1547_c0_g1_i4_2043	C/T	TRINITY_DN1547_c0_g1_i4	2043	NA	NA	+	TRINITY_DN1547_c0_g1_i4	NA	NA	NA	CC	CC	CC	CC	TT	TT
	UTRINITY_DN28150_c0_g1_i2_169	T/G	TRINITY_DN28150_c0_g1_i2	169	NA	NA	+	TRINITY_DN28150_c0_g1_i2	NA	NA	NA	TT	TT	TT	TT	GG	GG
	UTRINITY_DN28150_c0_g1_i2_172	T/C	TRINITY_DN28150_c0_g1_i2	172	NA	NA	+	TRINITY_DN28150_c0_g1_i2	NA	NA	NA	TT	TT	TT	TT	CC	CC
	UTRINITY_DN2331_c0_g1_i9_387	C/T	TRINITY_DN2331_c0_g1_i9	387	NA	NA	+	TRINITY_DN2331_c0_g1_i9	NA	NA	NA	CC	CC	CC	CC	CT	CT
	UTRINITY_DN13827_c0_g1_i1_77	C/G	TRINITY_DN13827_c0_g1_i1	77	NA	NA	+	TRINITY_DN13827_c0_g1_i1	NA	NA	NA	CC	CC	CC	CC	GG	GG
	UTRINITY_DN13827_c0_g1_i1_128	A/G	TRINITY_DN13827_c0_g1_i1	128	NA	NA	+	TRINITY_DN13827_c0_g1_i1	NA	NA	NA	AA	AA	AA	AA	GG	GG
	UTRINITY_DN5061_c0_g1_i2_1771	T/C	TRINITY_DN5061_c0_g1_i2	1771	NA	NA	+	TRINITY_DN5061_c0_g1_i2	NA	NA	NA	CC	CC	TT	TT	TT	TT
	UTRINITY_DN11511_c0_g1_i4_288	C/T	TRINITY_DN11511_c0_g1_i4	288	NA	NA	+	TRINITY_DN11511_c0_g1_i4	NA	NA	NA	TT	TT	CC	CC	CC	CC
	UTRINITY_DN9695_c0_g1_i3_778	A/T	TRINITY_DN9695_c0_g1_i3	778	NA	NA	+	TRINITY_DN9695_c0_g1_i3	NA	NA	NA	AT	AT	AT	AT	AA	AA
	UTRINITY_DN9695_c0_g1_i3_786	G/A	TRINITY_DN9695_c0_g1_i3	786	NA	NA	+	TRINITY_DN9695_c0_g1_i3	NA	NA	NA	GA	GA	GA	GA	GG	GG
	UTRINITY_DN9695_c0_g1_i3_797	T/A	TRINITY_DN9695_c0_g1_i3	797	NA	NA	+	TRINITY_DN9695_c0_g1_i3	NA	NA	NA	TA	TA	TA	TA	TT	TT
	UTRINITY_DN9695_c0_g1_i3_829	A/C	TRINITY_DN9695_c0_g1_i3	829	NA	NA	+	TRINITY_DN9695_c0_g1_i3	NA	NA	NA	AC	AC	AC	AC	AA	AA
	UTRINITY_DN9695_c0_g1_i3_844	A/T	TRINITY_DN9695_c0_g1_i3	844	NA	NA	+	TRINITY_DN9695_c0_g1_i3	NA	NA	NA	AA	AA	AA	AA	AT	AT
	UTRINITY_DN9695_c0_g1_i3_858	T/A	TRINITY_DN9695_c0_g1_i3	858	NA	NA	+	TRINITY_DN9695_c0_g1_i3	NA	NA	NA	TA	TA	TA	TA	TT	TT
	UTRINITY_DN9695_c0_g1_i3_985	C/T	TRINITY_DN9695_c0_g1_i3	985	NA	NA	+	TRINITY_DN9695_c0_g1_i3	NA	NA	NA	CC	CC	CC	CC	CT	CT
	UTRINITY_DN9695_c0_g1_i3_1122	C/T	TRINITY_DN9695_c0_g1_i3	1122	NA	NA	+	TRINITY_DN9695_c0_g1_i3	NA	NA	NA	CT	CT	CT	CT	CC	CC
	UTRINITY_DN9695_c0_g1_i3_1174	T/A	TRINITY_DN9695_c0_g1_i3	1174	NA	NA	+	TRINITY_DN9695_c0_g1_i3	NA	NA	NA	TT	TT	TT	TT	TA	TA
	UTRINITY_DN9695_c0_g1_i3_1189	A/C	TRINITY_DN9695_c0_g1_i3	1189	NA	NA	+	TRINITY_DN9695_c0_g1_i3	NA	NA	NA	AC	AC	AC	AC	AA	AA
	UTRINITY_DN9695_c0_g1_i3_1193	C/A	TRINITY_DN9695_c0_g1_i3	1193	NA	NA	+	TRINITY_DN9695_c0_g1_i3	NA	NA	NA	CA	CA	CA	CA	CC	CC
	UTRINITY_DN9695_c0_g1_i3_1215	T/C	TRINITY_DN9695_c0_g1_i3	1215	NA	NA	+	TRINITY_DN9695_c0_g1_i3	NA	NA	NA	TT	TT	TT	TT	TC	TC
	UTRINITY_DN9695_c0_g1_i3_1366	A/T	TRINITY_DN9695_c0_g1_i3	1366	NA	NA	+	TRINITY_DN9695_c0_g1_i3	NA	NA	NA	AA	AA	AA	AA	AT	AT
	UTRINITY_DN9695_c0_g1_i3_1389	T/C	TRINITY_DN9695_c0_g1_i3	1389	NA	NA	+	TRINITY_DN9695_c0_g1_i3	NA	NA	NA	TT	TT	TT	TT	TC	TC
	UTRINITY_DN22841_c0_g1_i1_279	T/C	TRINITY_DN22841_c0_g1_i1	279	NA	NA	+	TRINITY_DN22841_c0_g1_i1	NA	NA	NA	TT	TT	TT	TT	TC	TC
	UTRINITY_DN22841_c0_g1_i1_591	C/G	TRINITY_DN22841_c0_g1_i1	591	NA	NA	+	TRINITY_DN22841_c0_g1_i1	NA	NA	NA	CC	CC	CG	CG	CG	CG
	UTRINITY_DN41785_c0_g1_i1_652	A/G	TRINITY_DN41785_c0_g1_i1	652	NA	NA	+	TRINITY_DN41785_c0_g1_i1	NA	NA	NA	GG	GG	AA	AA	AA	AA
	UTRINITY_DN41785_c0_g1_i1_676	G/T	TRINITY_DN41785_c0_g1_i1	676	NA	NA	+	TRINITY_DN41785_c0_g1_i1	NA	NA	NA	TT	TT	GG	GG	GG	GG
	UTRINITY_DN8422_c0_g1_i4_1982	G/A	TRINITY_DN8422_c0_g1_i4	1982	NA	NA	+	TRINITY_DN8422_c0_g1_i4	NA	NA	NA	GG	GG	GG	GG	AA	AA
	UTRINITY_DN22213_c0_g1_i11_22	T/C	TRINITY_DN22213_c0_g1_i11	22	NA	NA	+	TRINITY_DN22213_c0_g1_i11	NA	NA	NA	TC	TC	TC	TC	TT	TT
	UTRINITY_DN22213_c0_g1_i11_145	A/G	TRINITY_DN22213_c0_g1_i11	145	NA	NA	+	TRINITY_DN22213_c0_g1_i11	NA	NA	NA	GA	GA	GA	GA	AA	AA
	UTRINITY_DN7846_c0_g1_i1_376	T/A	TRINITY_DN7846_c0_g1_i1	376	NA	NA	+	TRINITY_DN7846_c0_g1_i1	NA	NA	NA	TT	TT	TT	TT	AA	AA
	UTRINITY_DN7846_c0_g1_i1_379	A/G	TRINITY_DN7846_c0_g1_i1	379	NA	NA	+	TRINITY_DN7846_c0_g1_i1	NA	NA	NA	AA	AA	AA	AA	GG	GG
	UTRINITY_DN7846_c0_g1_i1_391	G/A	TRINITY_DN7846_c0_g1_i1	391	NA	NA	+	TRINITY_DN7846_c0_g1_i1	NA	NA	NA	GG	GG	GG	GG	AA	AA
	UTRINITY_DN40252_c0_g2_i1_70	A/G	TRINITY_DN40252_c0_g2_i1	70	NA	NA	+	TRINITY_DN40252_c0_g2_i1	NA	NA	NA	AA	AA	AA	AA	AG	AG
	UTRINITY_DN40252_c0_g2_i1_139	C/G	TRINITY_DN40252_c0_g2_i1	139	NA	NA	+	TRINITY_DN40252_c0_g2_i1	NA	NA	NA	CC	CC	CC	CC	CG	CG
	UTRINITY_DN40252_c0_g2_i1_160	C/T	TRINITY_DN40252_c0_g2_i1	160	NA	NA	+	TRINITY_DN40252_c0_g2_i1	NA	NA	NA	CC	CC	CC	CC	CT	CT
	UTRINITY_DN2123_c0_g1_i6_786	T/A	TRINITY_DN2123_c0_g1_i6	786	NA	NA	+	TRINITY_DN2123_c0_g1_i6	NA	NA	NA	TT	TT	AA	AA	TT	TT
	UTRINITY_DN9323_c0_g1_i9_902	T/G	TRINITY_DN9323_c0_g1_i9	902	NA	NA	+	TRINITY_DN9323_c0_g1_i9	NA	NA	NA	GG	GG	TG	TG	TT	TT
	UTRINITY_DN8489_c0_g1_i8_1702	T/C	TRINITY_DN8489_c0_g1_i8	1702	NA	NA	+	TRINITY_DN8489_c0_g1_i8	NA	NA	NA	TT	TT	TT	TT	CC	CC
	UTRINITY_DN12212_c0_g1_i7_545	C/T	TRINITY_DN12212_c0_g1_i7	545	NA	NA	+	TRINITY_DN12212_c0_g1_i7	NA	NA	NA	CC	CC	CC	CC	CT	CT
	UTRINITY_DN8261_c0_g1_i1_838	G/A	TRINITY_DN8261_c0_g1_i1	838	NA	NA	+	TRINITY_DN8261_c0_g1_i1	NA	NA	NA	AA	AA	GG	GG	GG	GG
	UTRINITY_DN2132_c0_g2_i2_790	C/T	TRINITY_DN2132_c0_g2_i2	790	NA	NA	+	TRINITY_DN2132_c0_g2_i2	NA	NA	NA	CT	CT	CT	CT	CC	CC
	UTRINITY_DN529_c0_g1_i2_488	T/C	TRINITY_DN529_c0_g1_i2	488	NA	NA	+	TRINITY_DN529_c0_g1_i2	NA	NA	NA	TT	TT	CC	CC	TT	TT
	UTRINITY_DN15335_c0_g1_i1_743	G/A	TRINITY_DN15335_c0_g1_i1	743	NA	NA	+	TRINITY_DN15335_c0_g1_i1	NA	NA	NA	GG	GG	AA	AA	GG	GG
	UTRINITY_DN14165_c0_g1_i4_296	G/C	TRINITY_DN14165_c0_g1_i4	296	NA	NA	+	TRINITY_DN14165_c0_g1_i4	NA	NA	NA	CC	CC	GG	GG	GG	GG
	UTRINITY_DN2595_c0_g1_i12_1165	G/C	TRINITY_DN2595_c0_g1_i12	1165	NA	NA	+	TRINITY_DN2595_c0_g1_i12	NA	NA	NA	CC	CC	GG	GG	GG	GG
	UTRINITY_DN2595_c0_g1_i12_1696	T/C	TRINITY_DN2595_c0_g1_i12	1696	NA	NA	+	TRINITY_DN2595_c0_g1_i12	NA	NA	NA	CC	CC	TT	TT	TT	TT
	UTRINITY_DN14181_c0_g1_i4_2618	G/A	TRINITY_DN14181_c0_g1_i4	2618	NA	NA	+	TRINITY_DN14181_c0_g1_i4	NA	NA	NA	GG	GG	GG	GG	AA	AA
	UTRINITY_DN5679_c0_g1_i10_406	A/T	TRINITY_DN5679_c0_g1_i10	406	NA	NA	+	TRINITY_DN5679_c0_g1_i10	NA	NA	NA	AA	AA	AA	AA	TT	TT
	UTRINITY_DN22731_c0_g1_i2_135	C/T	TRINITY_DN22731_c0_g1_i2	135	NA	NA	+	TRINITY_DN22731_c0_g1_i2	NA	NA	NA	CC	CC	CC	CC	TT	TT
	UTRINITY_DN24666_c0_g1_i2_529	C/A	TRINITY_DN24666_c0_g1_i2	529	NA	NA	+	TRINITY_DN24666_c0_g1_i2	NA	NA	NA	AA	AA	CC	CC	CC	CC
	UTRINITY_DN17039_c0_g1_i2_45	T/C	TRINITY_DN17039_c0_g1_i2	45	NA	NA	+	TRINITY_DN17039_c0_g1_i2	NA	NA	NA	TT	TT	TT	TT	CC	CC
	UTRINITY_DN17039_c0_g1_i2_134	A/G	TRINITY_DN17039_c0_g1_i2	134	NA	NA	+	TRINITY_DN17039_c0_g1_i2	NA	NA	NA	AA	AA	AA	AA	GG	GG
	UTRINITY_DN3299_c0_g1_i1_716	G/C	TRINITY_DN3299_c0_g1_i1	716	NA	NA	+	TRINITY_DN3299_c0_g1_i1	NA	NA	NA	GG	GG	GG	GG	CC	CC
	UTRINITY_DN8552_c2_g2_i4_240	T/C	TRINITY_DN8552_c2_g2_i4	240	NA	NA	+	TRINITY_DN8552_c2_g2_i4	NA	NA	NA	TT	TT	TT	TT	CC	CC
	UTRINITY_DN8552_c2_g2_i4_252	T/C	TRINITY_DN8552_c2_g2_i4	252	NA	NA	+	TRINITY_DN8552_c2_g2_i4	NA	NA	NA	TT	TT	TT	TT	CC	CC
	UTRINITY_DN8617_c0_g1_i5_414	A/G	TRINITY_DN8617_c0_g1_i5	414	NA	NA	+	TRINITY_DN8617_c0_g1_i5	NA	NA	NA	GA	GA	GG	GG	AA	AA
	UTRINITY_DN22948_c1_g1_i3_142	T/C	TRINITY_DN22948_c1_g1_i3	142	NA	NA	+	TRINITY_DN22948_c1_g1_i3	NA	NA	NA	TT	TT	CC	CC	TT	TT
	UTRINITY_DN10934_c0_g1_i6_346	T/C	TRINITY_DN10934_c0_g1_i6	346	NA	NA	+	TRINITY_DN10934_c0_g1_i6	NA	NA	NA	TT	TT	CC	CC	TT	TT
	UTRINITY_DN43702_c0_g1_i10_2376	T/C	TRINITY_DN43702_c0_g1_i10	2376	NA	NA	+	TRINITY_DN43702_c0_g1_i10	NA	NA	NA	TT	TT	TT	TT	TC	TC
	UTRINITY_DN43702_c0_g1_i10_2379	T/C	TRINITY_DN43702_c0_g1_i10	2379	NA	NA	+	TRINITY_DN43702_c0_g1_i10	NA	NA	NA	TT	TT	TT	TT	TC	TC
	UTRINITY_DN15080_c0_g5_i1_179	C/G	TRINITY_DN15080_c0_g5_i1	179	NA	NA	+	TRINITY_DN15080_c0_g5_i1	NA	NA	NA	CC	CC	CC	CC	GG	GG
	UTRINITY_DN37586_c0_g1_i6_245	G/A	TRINITY_DN37586_c0_g1_i6	245	NA	NA	+	TRINITY_DN37586_c0_g1_i6	NA	NA	NA	GG	GG	AA	AA	GG	GG
	UTRINITY_DN16538_c0_g1_i2_124	C/T	TRINITY_DN16538_c0_g1_i2	124	NA	NA	+	TRINITY_DN16538_c0_g1_i2	NA	NA	NA	CC	CC	CT	CT	CC	CC
	UTRINITY_DN70170_c0_g1_i1_170	G/A	TRINITY_DN70170_c0_g1_i1	170	NA	NA	+	TRINITY_DN70170_c0_g1_i1	NA	NA	NA	GG	GG	GG	GG	AG	AG
	UTRINITY_DN70170_c0_g1_i1_187	A/T	TRINITY_DN70170_c0_g1_i1	187	NA	NA	+	TRINITY_DN70170_c0_g1_i1	NA	NA	NA	AA	AA	AA	AA	TA	TA
	UTRINITY_DN70170_c0_g1_i1_191	G/A	TRINITY_DN70170_c0_g1_i1	191	NA	NA	+	TRINITY_DN70170_c0_g1_i1	NA	NA	NA	GG	GG	GG	GG	AG	AG
	UTRINITY_DN70170_c0_g1_i1_225	C/T	TRINITY_DN70170_c0_g1_i1	225	NA	NA	+	TRINITY_DN70170_c0_g1_i1	NA	NA	NA	CC	CC	CC	CC	TC	TC
	UTRINITY_DN70170_c0_g1_i1_241	C/T	TRINITY_DN70170_c0_g1_i1	241	NA	NA	+	TRINITY_DN70170_c0_g1_i1	NA	NA	NA	CC	CC	CC	CC	TT	TT
	UTRINITY_DN12321_c0_g1_i2_1961	A/T	TRINITY_DN12321_c0_g1_i2	1961	NA	NA	+	TRINITY_DN12321_c0_g1_i2	NA	NA	NA	AA	AA	AA	AA	AT	AT
	UTRINITY_DN3996_c0_g1_i2_2544	G/A	TRINITY_DN3996_c0_g1_i2	2544	NA	NA	+	TRINITY_DN3996_c0_g1_i2	NA	NA	NA	AA	AA	GG	GG	GG	GG
	UTRINITY_DN2849_c0_g1_i1_2840	A/C	TRINITY_DN2849_c0_g1_i1	2840	NA	NA	+	TRINITY_DN2849_c0_g1_i1	NA	NA	NA	CC	CC	AA	AA	AA	AA
	UTRINITY_DN4177_c0_g1_i3_825	A/C	TRINITY_DN4177_c0_g1_i3	825	NA	NA	+	TRINITY_DN4177_c0_g1_i3	NA	NA	NA	AA	AA	AA	AA	CC	CC
	UTRINITY_DN4177_c0_g1_i3_1026	C/A	TRINITY_DN4177_c0_g1_i3	1026	NA	NA	+	TRINITY_DN4177_c0_g1_i3	NA	NA	NA	CC	CC	CC	CC	AA	AA
	UTRINITY_DN4177_c0_g1_i3_1030	C/T	TRINITY_DN4177_c0_g1_i3	1030	NA	NA	+	TRINITY_DN4177_c0_g1_i3	NA	NA	NA	CC	CC	CC	CC	TT	TT
	UTRINITY_DN7590_c0_g1_i16_870	C/T	TRINITY_DN7590_c0_g1_i16	870	NA	NA	+	TRINITY_DN7590_c0_g1_i16	NA	NA	NA	CC	CC	CC	CC	TC	TC
	UTRINITY_DN7590_c0_g1_i16_951	T/G	TRINITY_DN7590_c0_g1_i16	951	NA	NA	+	TRINITY_DN7590_c0_g1_i16	NA	NA	NA	TT	TT	TT	TT	TG	TG
	UTRINITY_DN7590_c0_g1_i16_953	T/A	TRINITY_DN7590_c0_g1_i16	953	NA	NA	+	TRINITY_DN7590_c0_g1_i16	NA	NA	NA	TT	TT	TT	TT	TA	TA
	UTRINITY_DN7590_c0_g1_i16_961	A/T	TRINITY_DN7590_c0_g1_i16	961	NA	NA	+	TRINITY_DN7590_c0_g1_i16	NA	NA	NA	AA	AA	AA	AA	AT	AT
	UTRINITY_DN7590_c0_g1_i16_987	T/G	TRINITY_DN7590_c0_g1_i16	987	NA	NA	+	TRINITY_DN7590_c0_g1_i16	NA	NA	NA	TT	TT	TT	TT	TG	TG
	UTRINITY_DN7590_c0_g1_i16_988	T/A	TRINITY_DN7590_c0_g1_i16	988	NA	NA	+	TRINITY_DN7590_c0_g1_i16	NA	NA	NA	TT	TT	TT	TT	TA	TA
	UTRINITY_DN7590_c0_g1_i16_993	G/T	TRINITY_DN7590_c0_g1_i16	993	NA	NA	+	TRINITY_DN7590_c0_g1_i16	NA	NA	NA	GG	GG	GG	GG	GT	GT
	UTRINITY_DN3264_c0_g1_i2_144	T/C	TRINITY_DN3264_c0_g1_i2	144	NA	NA	+	TRINITY_DN3264_c0_g1_i2	NA	NA	NA	TT	TT	TT	TT	CC	CC
	UTRINITY_DN3264_c0_g1_i2_153	G/A	TRINITY_DN3264_c0_g1_i2	153	NA	NA	+	TRINITY_DN3264_c0_g1_i2	NA	NA	NA	GG	GG	GG	GG	AA	AA
	UTRINITY_DN3264_c0_g1_i2_167	G/A	TRINITY_DN3264_c0_g1_i2	167	NA	NA	+	TRINITY_DN3264_c0_g1_i2	NA	NA	NA	GG	GG	GG	GG	AA	AA
	UTRINITY_DN2836_c0_g1_i3_1241	A/G	TRINITY_DN2836_c0_g1_i3	1241	NA	NA	+	TRINITY_DN2836_c0_g1_i3	NA	NA	NA	AA	AA	AA	AA	GG	GG
	UTRINITY_DN2836_c0_g1_i3_1244	G/A	TRINITY_DN2836_c0_g1_i3	1244	NA	NA	+	TRINITY_DN2836_c0_g1_i3	NA	NA	NA	GG	GG	GG	GG	AA	AA
	UTRINITY_DN2836_c0_g1_i3_1250	G/A	TRINITY_DN2836_c0_g1_i3	1250	NA	NA	+	TRINITY_DN2836_c0_g1_i3	NA	NA	NA	GG	GG	GG	GG	AA	AA
	UTRINITY_DN40437_c1_g1_i4_168	A/G	TRINITY_DN40437_c1_g1_i4	168	NA	NA	+	TRINITY_DN40437_c1_g1_i4	NA	NA	NA	GG	GG	AA	AA	AA	AA
	UTRINITY_DN19162_c0_g1_i1_239	T/A	TRINITY_DN19162_c0_g1_i1	239	NA	NA	+	TRINITY_DN19162_c0_g1_i1	NA	NA	NA	TT	TT	TA	TA	TA	TA
	UTRINITY_DN21501_c0_g1_i1_151	T/C	TRINITY_DN21501_c0_g1_i1	151	NA	NA	+	TRINITY_DN21501_c0_g1_i1	NA	NA	NA	--	--	CC	CC	TT	TT
	UTRINITY_DN62645_c0_g5_i2_178	A/C	TRINITY_DN62645_c0_g5_i2	178	NA	NA	+	TRINITY_DN62645_c0_g5_i2	NA	NA	NA	AA	AA	AA	AA	AC	AC
	UTRINITY_DN62645_c0_g5_i2_215	C/T	TRINITY_DN62645_c0_g5_i2	215	NA	NA	+	TRINITY_DN62645_c0_g5_i2	NA	NA	NA	CT	CT	CT	CT	CC	CC
	UTRINITY_DN62645_c0_g5_i2_367	A/G	TRINITY_DN62645_c0_g5_i2	367	NA	NA	+	TRINITY_DN62645_c0_g5_i2	NA	NA	NA	AG	AG	AA	AA	AA	AA
	UTRINITY_DN62645_c0_g5_i2_424	C/A	TRINITY_DN62645_c0_g5_i2	424	NA	NA	+	TRINITY_DN62645_c0_g5_i2	NA	NA	NA	CC	CC	CC	CC	CA	CA
	UTRINITY_DN62645_c0_g5_i2_444	T/A	TRINITY_DN62645_c0_g5_i2	444	NA	NA	+	TRINITY_DN62645_c0_g5_i2	NA	NA	NA	TT	TT	TT	TT	TA	TA
	UTRINITY_DN52860_c0_g1_i1_120	G/C	TRINITY_DN52860_c0_g1_i1	120	NA	NA	+	TRINITY_DN52860_c0_g1_i1	NA	NA	NA	GG	GG	GG	GG	CC	CC
	UTRINITY_DN8162_c0_g1_i5_182	T/C	TRINITY_DN8162_c0_g1_i5	182	NA	NA	+	TRINITY_DN8162_c0_g1_i5	NA	NA	NA	TT	TT	TT	TT	CC	CC
	UTRINITY_DN8162_c0_g1_i5_197	G/C	TRINITY_DN8162_c0_g1_i5	197	NA	NA	+	TRINITY_DN8162_c0_g1_i5	NA	NA	NA	CC	CC	GG	GG	GG	GG
	UTRINITY_DN35640_c0_g1_i2_95	G/T	TRINITY_DN35640_c0_g1_i2	95	NA	NA	+	TRINITY_DN35640_c0_g1_i2	NA	NA	NA	GG	GG	GG	GG	TT	TT
	UTRINITY_DN5913_c0_g1_i2_523	G/A	TRINITY_DN5913_c0_g1_i2	523	NA	NA	+	TRINITY_DN5913_c0_g1_i2	NA	NA	NA	AA	AA	GG	GG	GG	GG
	UTRINITY_DN5913_c0_g1_i2_576	A/G	TRINITY_DN5913_c0_g1_i2	576	NA	NA	+	TRINITY_DN5913_c0_g1_i2	NA	NA	NA	AA	AA	AA	AA	GG	GG
	UTRINITY_DN11607_c0_g1_i15_468	T/A	TRINITY_DN11607_c0_g1_i15	468	NA	NA	+	TRINITY_DN11607_c0_g1_i15	NA	NA	NA	AA	AA	TT	TT	TT	TT
	UTRINITY_DN11607_c0_g1_i15_481	A/G	TRINITY_DN11607_c0_g1_i15	481	NA	NA	+	TRINITY_DN11607_c0_g1_i15	NA	NA	NA	GG	GG	AA	AA	AA	AA
	UTRINITY_DN17703_c0_g1_i3_1047	A/G	TRINITY_DN17703_c0_g1_i3	1047	NA	NA	+	TRINITY_DN17703_c0_g1_i3	NA	NA	NA	AG	AG	AA	AA	AA	AA
	UTRINITY_DN1816_c0_g1_i8_932	G/A	TRINITY_DN1816_c0_g1_i8	932	NA	NA	+	TRINITY_DN1816_c0_g1_i8	NA	NA	NA	GG	GG	AA	AA	GG	GG
	UTRINITY_DN1749_c0_g1_i9_1147	G/C	TRINITY_DN1749_c0_g1_i9	1147	NA	NA	+	TRINITY_DN1749_c0_g1_i9	NA	NA	NA	GC	GC	GG	GG	GG	GG
	UTRINITY_DN30143_c0_g1_i2_1049	T/G	TRINITY_DN30143_c0_g1_i2	1049	NA	NA	+	TRINITY_DN30143_c0_g1_i2	NA	NA	NA	GG	GG	TT	TT	TT	TT
	UTRINITY_DN30143_c0_g1_i2_1058	A/G	TRINITY_DN30143_c0_g1_i2	1058	NA	NA	+	TRINITY_DN30143_c0_g1_i2	NA	NA	NA	GG	GG	AA	AA	AA	AA
	UTRINITY_DN3643_c0_g1_i13_3201	G/T	TRINITY_DN3643_c0_g1_i13	3201	NA	NA	+	TRINITY_DN3643_c0_g1_i13	NA	NA	NA	GG	GG	GG	GG	TT	TT
	UTRINITY_DN3643_c0_g1_i13_3208	T/C	TRINITY_DN3643_c0_g1_i13	3208	NA	NA	+	TRINITY_DN3643_c0_g1_i13	NA	NA	NA	TT	TT	TT	TT	CC	CC
	UTRINITY_DN7564_c0_g1_i3_203	C/T	TRINITY_DN7564_c0_g1_i3	203	NA	NA	+	TRINITY_DN7564_c0_g1_i3	NA	NA	NA	CC	CC	CC	CC	CT	CT
	UTRINITY_DN7564_c0_g1_i3_419	C/T	TRINITY_DN7564_c0_g1_i3	419	NA	NA	+	TRINITY_DN7564_c0_g1_i3	NA	NA	NA	CC	CC	CT	CT	CC	CC
	UTRINITY_DN16616_c0_g2_i1_368	A/T	TRINITY_DN16616_c0_g2_i1	368	NA	NA	+	TRINITY_DN16616_c0_g2_i1	NA	NA	NA	TT	TT	AA	AA	AA	AA
	UTRINITY_DN3516_c0_g1_i2_1285	G/A	TRINITY_DN3516_c0_g1_i2	1285	NA	NA	+	TRINITY_DN3516_c0_g1_i2	NA	NA	NA	AA	AA	GG	GG	GG	GG
	UTRINITY_DN3516_c0_g1_i2_1306	A/T	TRINITY_DN3516_c0_g1_i2	1306	NA	NA	+	TRINITY_DN3516_c0_g1_i2	NA	NA	NA	TT	TT	AA	AA	AA	AA
	UTRINITY_DN3516_c0_g1_i2_1360	G/A	TRINITY_DN3516_c0_g1_i2	1360	NA	NA	+	TRINITY_DN3516_c0_g1_i2	NA	NA	NA	GG	GG	GG	GG	AA	AA
	UTRINITY_DN1824_c0_g1_i4_322	T/C	TRINITY_DN1824_c0_g1_i4	322	NA	NA	+	TRINITY_DN1824_c0_g1_i4	NA	NA	NA	TC	TC	TT	TT	TT	TT
	UTRINITY_DN1824_c0_g1_i4_386	C/T	TRINITY_DN1824_c0_g1_i4	386	NA	NA	+	TRINITY_DN1824_c0_g1_i4	NA	NA	NA	CT	CT	CC	CC	CC	CC
	UTRINITY_DN1824_c0_g1_i4_468	A/C	TRINITY_DN1824_c0_g1_i4	468	NA	NA	+	TRINITY_DN1824_c0_g1_i4	NA	NA	NA	CA	CA	CA	CA	AA	AA
	UTRINITY_DN15368_c0_g2_i1_93	C/A	TRINITY_DN15368_c0_g2_i1	93	NA	NA	+	TRINITY_DN15368_c0_g2_i1	NA	NA	NA	CC	CC	CC	CC	CA	CA
	UTRINITY_DN15368_c0_g2_i1_248	A/G	TRINITY_DN15368_c0_g2_i1	248	NA	NA	+	TRINITY_DN15368_c0_g2_i1	NA	NA	NA	AA	AA	AA	AA	AG	AG
	UTRINITY_DN15368_c0_g2_i1_254	T/C	TRINITY_DN15368_c0_g2_i1	254	NA	NA	+	TRINITY_DN15368_c0_g2_i1	NA	NA	NA	TT	TT	TT	TT	TC	TC
	UTRINITY_DN15368_c0_g2_i1_279	A/G	TRINITY_DN15368_c0_g2_i1	279	NA	NA	+	TRINITY_DN15368_c0_g2_i1	NA	NA	NA	AA	AA	AA	AA	AG	AG
	UTRINITY_DN15368_c0_g2_i1_281	G/A	TRINITY_DN15368_c0_g2_i1	281	NA	NA	+	TRINITY_DN15368_c0_g2_i1	NA	NA	NA	GG	GG	GG	GG	GA	GA
	UTRINITY_DN9596_c0_g2_i2_635	A/G	TRINITY_DN9596_c0_g2_i2	635	NA	NA	+	TRINITY_DN9596_c0_g2_i2	NA	NA	NA	AA	AA	AA	AA	GG	GG
	UTRINITY_DN3221_c0_g1_i2_366	G/C	TRINITY_DN3221_c0_g1_i2	366	NA	NA	+	TRINITY_DN3221_c0_g1_i2	NA	NA	NA	GG	GG	GG	GG	GC	GC
	UTRINITY_DN3221_c0_g1_i2_371	C/G	TRINITY_DN3221_c0_g1_i2	371	NA	NA	+	TRINITY_DN3221_c0_g1_i2	NA	NA	NA	CC	CC	CC	CC	CG	CG
	UTRINITY_DN3221_c0_g1_i2_381	A/C	TRINITY_DN3221_c0_g1_i2	381	NA	NA	+	TRINITY_DN3221_c0_g1_i2	NA	NA	NA	AA	AA	AA	AA	AC	AC
	UTRINITY_DN3221_c0_g1_i2_387	G/T	TRINITY_DN3221_c0_g1_i2	387	NA	NA	+	TRINITY_DN3221_c0_g1_i2	NA	NA	NA	GG	GG	GG	GG	GT	GT
	UTRINITY_DN3221_c0_g1_i2_415	C/A	TRINITY_DN3221_c0_g1_i2	415	NA	NA	+	TRINITY_DN3221_c0_g1_i2	NA	NA	NA	CC	CC	CC	CC	AA	AA
	UTRINITY_DN3221_c0_g1_i2_423	G/A	TRINITY_DN3221_c0_g1_i2	423	NA	NA	+	TRINITY_DN3221_c0_g1_i2	NA	NA	NA	GG	GG	GG	GG	AA	AA
	UTRINITY_DN3221_c0_g1_i2_619	T/A	TRINITY_DN3221_c0_g1_i2	619	NA	NA	+	TRINITY_DN3221_c0_g1_i2	NA	NA	NA	TT	TT	TT	TT	AA	AA
	UTRINITY_DN14595_c0_g1_i2_433	A/C	TRINITY_DN14595_c0_g1_i2	433	NA	NA	+	TRINITY_DN14595_c0_g1_i2	NA	NA	NA	CC	CC	AA	AA	AA	AA
	UTRINITY_DN14495_c0_g1_i1_155	T/C	TRINITY_DN14495_c0_g1_i1	155	NA	NA	+	TRINITY_DN14495_c0_g1_i1	NA	NA	NA	CC	CC	TT	TT	TT	TT
	UTRINITY_DN3961_c0_g1_i2_210	G/A	TRINITY_DN3961_c0_g1_i2	210	NA	NA	+	TRINITY_DN3961_c0_g1_i2	NA	NA	NA	GG	GG	GA	GA	GA	GA
	UTRINITY_DN3961_c0_g1_i2_303	G/T	TRINITY_DN3961_c0_g1_i2	303	NA	NA	+	TRINITY_DN3961_c0_g1_i2	NA	NA	NA	GG	GG	GT	GT	GT	GT
	UTRINITY_DN3961_c0_g1_i2_309	C/T	TRINITY_DN3961_c0_g1_i2	309	NA	NA	+	TRINITY_DN3961_c0_g1_i2	NA	NA	NA	CC	CC	CT	CT	CT	CT
	UTRINITY_DN3554_c0_g1_i2_563	G/T	TRINITY_DN3554_c0_g1_i2	563	NA	NA	+	TRINITY_DN3554_c0_g1_i2	NA	NA	NA	GG	GG	GG	GG	TT	TT
	UTRINITY_DN22914_c0_g1_i1_84	T/C	TRINITY_DN22914_c0_g1_i1	84	NA	NA	+	TRINITY_DN22914_c0_g1_i1	NA	NA	NA	TT	TT	TC	TC	TT	TT
	UTRINITY_DN22914_c0_g1_i1_705	T/G	TRINITY_DN22914_c0_g1_i1	705	NA	NA	+	TRINITY_DN22914_c0_g1_i1	NA	NA	NA	TG	TG	TT	TT	TT	TT
	UTRINITY_DN16001_c0_g1_i7_2022	C/T	TRINITY_DN16001_c0_g1_i7	2022	NA	NA	+	TRINITY_DN16001_c0_g1_i7	NA	NA	NA	CC	CC	TT	TT	CC	CC
	UTRINITY_DN16001_c0_g1_i7_2025	T/C	TRINITY_DN16001_c0_g1_i7	2025	NA	NA	+	TRINITY_DN16001_c0_g1_i7	NA	NA	NA	TT	TT	CC	CC	TT	TT
	UTRINITY_DN117_c0_g1_i6_915	G/T	TRINITY_DN117_c0_g1_i6	915	NA	NA	+	TRINITY_DN117_c0_g1_i6	NA	NA	NA	GG	GG	GG	GG	TT	TT
	UTRINITY_DN19152_c1_g1_i6_834	A/G	TRINITY_DN19152_c1_g1_i6	834	NA	NA	+	TRINITY_DN19152_c1_g1_i6	NA	NA	NA	AA	AA	--	--	GG	GG
	UTRINITY_DN19152_c1_g1_i6_836	T/C	TRINITY_DN19152_c1_g1_i6	836	NA	NA	+	TRINITY_DN19152_c1_g1_i6	NA	NA	NA	TT	TT	--	--	CC	CC
	UTRINITY_DN1760_c0_g1_i5_448	T/G	TRINITY_DN1760_c0_g1_i5	448	NA	NA	+	TRINITY_DN1760_c0_g1_i5	NA	NA	NA	--	--	TT	TT	TG	TG
	UTRINITY_DN8227_c0_g1_i5_294	C/G	TRINITY_DN8227_c0_g1_i5	294	NA	NA	+	TRINITY_DN8227_c0_g1_i5	NA	NA	NA	CC	CC	CC	CC	GG	GG
	UTRINITY_DN8227_c0_g1_i5_429	T/C	TRINITY_DN8227_c0_g1_i5	429	NA	NA	+	TRINITY_DN8227_c0_g1_i5	NA	NA	NA	TT	TT	TT	TT	CC	CC
	UTRINITY_DN8227_c0_g1_i5_434	C/G	TRINITY_DN8227_c0_g1_i5	434	NA	NA	+	TRINITY_DN8227_c0_g1_i5	NA	NA	NA	CC	CC	CC	CC	GG	GG
	UTRINITY_DN9771_c0_g1_i4_575	G/C	TRINITY_DN9771_c0_g1_i4	575	NA	NA	+	TRINITY_DN9771_c0_g1_i4	NA	NA	NA	GG	GG	GG	GG	CC	CC
	UTRINITY_DN9771_c0_g1_i4_591	G/C	TRINITY_DN9771_c0_g1_i4	591	NA	NA	+	TRINITY_DN9771_c0_g1_i4	NA	NA	NA	GG	GG	GG	GG	CC	CC
	UTRINITY_DN1518_c0_g1_i3_295	C/T	TRINITY_DN1518_c0_g1_i3	295	NA	NA	+	TRINITY_DN1518_c0_g1_i3	NA	NA	NA	CC	CC	CC	CC	CT	CT
	UTRINITY_DN3744_c0_g2_i2_695	T/G	TRINITY_DN3744_c0_g2_i2	695	NA	NA	+	TRINITY_DN3744_c0_g2_i2	NA	NA	NA	GG	GG	TT	TT	TT	TT
	UTRINITY_DN3744_c0_g2_i2_826	A/G	TRINITY_DN3744_c0_g2_i2	826	NA	NA	+	TRINITY_DN3744_c0_g2_i2	NA	NA	NA	GG	GG	AA	AA	AA	AA
	UTRINITY_DN3744_c0_g2_i2_846	C/T	TRINITY_DN3744_c0_g2_i2	846	NA	NA	+	TRINITY_DN3744_c0_g2_i2	NA	NA	NA	TT	TT	CC	CC	CC	CC
	UTRINITY_DN3744_c0_g2_i2_909	G/C	TRINITY_DN3744_c0_g2_i2	909	NA	NA	+	TRINITY_DN3744_c0_g2_i2	NA	NA	NA	CC	CC	GG	GG	GG	GG
	UTRINITY_DN3744_c0_g2_i2_1877	T/C	TRINITY_DN3744_c0_g2_i2	1877	NA	NA	+	TRINITY_DN3744_c0_g2_i2	NA	NA	NA	TT	TT	TT	TT	CC	CC
	UTRINITY_DN5489_c0_g2_i1_1116	A/G	TRINITY_DN5489_c0_g2_i1	1116	NA	NA	+	TRINITY_DN5489_c0_g2_i1	NA	NA	NA	AA	AA	AG	AG	AG	AG
	UTRINITY_DN5489_c0_g2_i1_1218	T/C	TRINITY_DN5489_c0_g2_i1	1218	NA	NA	+	TRINITY_DN5489_c0_g2_i1	NA	NA	NA	TT	TT	TT	TT	TC	TC
	UTRINITY_DN5489_c0_g2_i1_1779	G/A	TRINITY_DN5489_c0_g2_i1	1779	NA	NA	+	TRINITY_DN5489_c0_g2_i1	NA	NA	NA	GG	GG	GA	GA	GA	GA
	UTRINITY_DN5489_c0_g2_i1_1803	T/C	TRINITY_DN5489_c0_g2_i1	1803	NA	NA	+	TRINITY_DN5489_c0_g2_i1	NA	NA	NA	TC	TC	TC	TC	TT	TT
	UTRINITY_DN5489_c0_g2_i1_1937	G/A	TRINITY_DN5489_c0_g2_i1	1937	NA	NA	+	TRINITY_DN5489_c0_g2_i1	NA	NA	NA	GG	GG	GA	GA	GA	GA
	UTRINITY_DN63983_c1_g1_i1_88	T/A	TRINITY_DN63983_c1_g1_i1	88	NA	NA	+	TRINITY_DN63983_c1_g1_i1	NA	NA	NA	TT	TT	TA	TA	TT	TT
	UTRINITY_DN40493_c0_g1_i3_581	C/T	TRINITY_DN40493_c0_g1_i3	581	NA	NA	+	TRINITY_DN40493_c0_g1_i3	NA	NA	NA	CC	CC	TT	TT	CC	CC
	UTRINITY_DN105059_c0_g2_i1_621	G/A	TRINITY_DN105059_c0_g2_i1	621	NA	NA	+	TRINITY_DN105059_c0_g2_i1	NA	NA	NA	GG	GG	GG	GG	AA	AA
	UTRINITY_DN8996_c0_g1_i2_1072	A/G	TRINITY_DN8996_c0_g1_i2	1072	NA	NA	+	TRINITY_DN8996_c0_g1_i2	NA	NA	NA	AG	AG	AG	AG	AA	AA
	UTRINITY_DN8996_c0_g1_i2_1208	C/A	TRINITY_DN8996_c0_g1_i2	1208	NA	NA	+	TRINITY_DN8996_c0_g1_i2	NA	NA	NA	CA	CA	CC	CC	CA	CA
	UTRINITY_DN5979_c0_g1_i5_484	T/G	TRINITY_DN5979_c0_g1_i5	484	NA	NA	+	TRINITY_DN5979_c0_g1_i5	NA	NA	NA	TT	TT	TT	TT	GG	GG
	UTRINITY_DN5979_c0_g1_i5_502	G/A	TRINITY_DN5979_c0_g1_i5	502	NA	NA	+	TRINITY_DN5979_c0_g1_i5	NA	NA	NA	GG	GG	GG	GG	AA	AA
	UTRINITY_DN5979_c0_g1_i5_531	G/A	TRINITY_DN5979_c0_g1_i5	531	NA	NA	+	TRINITY_DN5979_c0_g1_i5	NA	NA	NA	GG	GG	GG	GG	AA	AA
	UTRINITY_DN26849_c0_g1_i12_589	T/C	TRINITY_DN26849_c0_g1_i12	589	NA	NA	+	TRINITY_DN26849_c0_g1_i12	NA	NA	NA	TT	TT	CC	CC	TT	TT
	UTRINITY_DN719_c0_g1_i11_893	T/G	TRINITY_DN719_c0_g1_i11	893	NA	NA	+	TRINITY_DN719_c0_g1_i11	NA	NA	NA	GG	GG	TT	TT	TT	TT
	UTRINITY_DN719_c0_g1_i11_895	T/C	TRINITY_DN719_c0_g1_i11	895	NA	NA	+	TRINITY_DN719_c0_g1_i11	NA	NA	NA	CC	CC	TT	TT	TT	TT
	UTRINITY_DN719_c0_g1_i11_896	C/G	TRINITY_DN719_c0_g1_i11	896	NA	NA	+	TRINITY_DN719_c0_g1_i11	NA	NA	NA	GG	GG	CC	CC	CC	CC
	UTRINITY_DN18225_c0_g1_i2_1606	T/G	TRINITY_DN18225_c0_g1_i2	1606	NA	NA	+	TRINITY_DN18225_c0_g1_i2	NA	NA	NA	GG	GG	TT	TT	TT	TT
	UTRINITY_DN3207_c0_g1_i11_1254	T/C	TRINITY_DN3207_c0_g1_i11	1254	NA	NA	+	TRINITY_DN3207_c0_g1_i11	NA	NA	NA	TT	TT	TT	TT	TC	TC
	UTRINITY_DN3207_c0_g1_i11_1346	A/T	TRINITY_DN3207_c0_g1_i11	1346	NA	NA	+	TRINITY_DN3207_c0_g1_i11	NA	NA	NA	AA	AA	AA	AA	AT	AT
	UTRINITY_DN3207_c0_g1_i11_2914	G/A	TRINITY_DN3207_c0_g1_i11	2914	NA	NA	+	TRINITY_DN3207_c0_g1_i11	NA	NA	NA	GG	GG	GG	GG	GA	GA
	UTRINITY_DN3207_c0_g1_i11_4455	T/C	TRINITY_DN3207_c0_g1_i11	4455	NA	NA	+	TRINITY_DN3207_c0_g1_i11	NA	NA	NA	TT	TT	CC	CC	TT	TT
	UTRINITY_DN53776_c0_g2_i1_498	A/G	TRINITY_DN53776_c0_g2_i1	498	NA	NA	+	TRINITY_DN53776_c0_g2_i1	NA	NA	NA	AA	AA	AG	AG	AA	AA
	UTRINITY_DN5641_c0_g1_i4_319	A/G	TRINITY_DN5641_c0_g1_i4	319	NA	NA	+	TRINITY_DN5641_c0_g1_i4	NA	NA	NA	AA	AA	AA	AA	GG	GG
	UTRINITY_DN5641_c0_g1_i4_462	T/C	TRINITY_DN5641_c0_g1_i4	462	NA	NA	+	TRINITY_DN5641_c0_g1_i4	NA	NA	NA	TT	TT	TT	TT	CC	CC
	UTRINITY_DN2192_c0_g1_i4_794	C/G	TRINITY_DN2192_c0_g1_i4	794	NA	NA	+	TRINITY_DN2192_c0_g1_i4	NA	NA	NA	CC	CC	CC	CC	GG	GG
	UTRINITY_DN9523_c0_g2_i3_557	A/G	TRINITY_DN9523_c0_g2_i3	557	NA	NA	+	TRINITY_DN9523_c0_g2_i3	NA	NA	NA	AA	AA	AA	AA	GG	GG
	UTRINITY_DN2152_c1_g4_i1_154	C/G	TRINITY_DN2152_c1_g4_i1	154	NA	NA	+	TRINITY_DN2152_c1_g4_i1	NA	NA	NA	CG	CG	CC	CC	CC	CC
	UTRINITY_DN6054_c0_g1_i2_151	T/C	TRINITY_DN6054_c0_g1_i2	151	NA	NA	+	TRINITY_DN6054_c0_g1_i2	NA	NA	NA	TT	TT	TC	TC	TC	TC
	UTRINITY_DN6054_c0_g1_i2_173	T/C	TRINITY_DN6054_c0_g1_i2	173	NA	NA	+	TRINITY_DN6054_c0_g1_i2	NA	NA	NA	TT	TT	TC	TC	TC	TC
	UTRINITY_DN19978_c0_g1_i2_110	A/C	TRINITY_DN19978_c0_g1_i2	110	NA	NA	+	TRINITY_DN19978_c0_g1_i2	NA	NA	NA	AA	AA	AC	AC	AA	AA
	UTRINITY_DN19978_c0_g1_i2_185	A/C	TRINITY_DN19978_c0_g1_i2	185	NA	NA	+	TRINITY_DN19978_c0_g1_i2	NA	NA	NA	AA	AA	AC	AC	AA	AA
	UTRINITY_DN11330_c0_g1_i1_1608	T/C	TRINITY_DN11330_c0_g1_i1	1608	NA	NA	+	TRINITY_DN11330_c0_g1_i1	NA	NA	NA	TT	TT	TT	TT	CC	CC
	UTRINITY_DN6655_c0_g1_i2_2626	A/C	TRINITY_DN6655_c0_g1_i2	2626	NA	NA	+	TRINITY_DN6655_c0_g1_i2	NA	NA	NA	AA	AA	AA	AA	CA	CA
	UTRINITY_DN8617_c0_g1_i12_219	T/C	TRINITY_DN8617_c0_g1_i12	219	NA	NA	+	TRINITY_DN8617_c0_g1_i12	NA	NA	NA	TT	TT	CC	CC	TT	TT
	UTRINITY_DN8617_c0_g1_i12_241	G/A	TRINITY_DN8617_c0_g1_i12	241	NA	NA	+	TRINITY_DN8617_c0_g1_i12	NA	NA	NA	AA	AA	GG	GG	GG	GG
	UTRINITY_DN29637_c0_g1_i4_497	A/T	TRINITY_DN29637_c0_g1_i4	497	NA	NA	+	TRINITY_DN29637_c0_g1_i4	NA	NA	NA	AA	AA	TT	TT	AA	AA
	UTRINITY_DN26594_c0_g1_i5_402	T/C	TRINITY_DN26594_c0_g1_i5	402	NA	NA	+	TRINITY_DN26594_c0_g1_i5	NA	NA	NA	CC	CC	TT	TT	TT	TT
	UTRINITY_DN12843_c0_g1_i3_100	T/C	TRINITY_DN12843_c0_g1_i3	100	NA	NA	+	TRINITY_DN12843_c0_g1_i3	NA	NA	NA	TT	TT	TT	TT	CC	CC
	UTRINITY_DN2037_c0_g2_i4_354	C/A	TRINITY_DN2037_c0_g2_i4	354	NA	NA	+	TRINITY_DN2037_c0_g2_i4	NA	NA	NA	CC	CC	CC	CC	AA	AA
	UTRINITY_DN8435_c0_g1_i11_289	T/C	TRINITY_DN8435_c0_g1_i11	289	NA	NA	+	TRINITY_DN8435_c0_g1_i11	NA	NA	NA	TT	TT	TT	TT	TC	TC
	UTRINITY_DN8435_c0_g1_i11_297	G/A	TRINITY_DN8435_c0_g1_i11	297	NA	NA	+	TRINITY_DN8435_c0_g1_i11	NA	NA	NA	GG	GG	GG	GG	GA	GA
	UTRINITY_DN8435_c0_g1_i11_303	T/G	TRINITY_DN8435_c0_g1_i11	303	NA	NA	+	TRINITY_DN8435_c0_g1_i11	NA	NA	NA	TT	TT	TT	TT	TG	TG
	UTRINITY_DN437_c0_g1_i19_1208	C/A	TRINITY_DN437_c0_g1_i19	1208	NA	NA	+	TRINITY_DN437_c0_g1_i19	NA	NA	NA	CC	CC	CC	CC	AA	AA
	UTRINITY_DN437_c0_g1_i19_1214	G/C	TRINITY_DN437_c0_g1_i19	1214	NA	NA	+	TRINITY_DN437_c0_g1_i19	NA	NA	NA	CC	CC	GG	GG	GG	GG
	UTRINITY_DN30876_c0_g1_i3_1328	A/C	TRINITY_DN30876_c0_g1_i3	1328	NA	NA	+	TRINITY_DN30876_c0_g1_i3	NA	NA	NA	CC	CC	AA	AA	--	--
	UTRINITY_DN30876_c0_g1_i3_1329	T/G	TRINITY_DN30876_c0_g1_i3	1329	NA	NA	+	TRINITY_DN30876_c0_g1_i3	NA	NA	NA	GG	GG	TT	TT	--	--
	UTRINITY_DN77079_c1_g1_i2_359	A/G	TRINITY_DN77079_c1_g1_i2	359	NA	NA	+	TRINITY_DN77079_c1_g1_i2	NA	NA	NA	AA	AA	AA	AA	GG	GG
	UTRINITY_DN893_c0_g1_i12_2036	G/A	TRINITY_DN893_c0_g1_i12	2036	NA	NA	+	TRINITY_DN893_c0_g1_i12	NA	NA	NA	GG	GG	AA	AA	GG	GG
	UTRINITY_DN893_c0_g1_i12_2039	C/G	TRINITY_DN893_c0_g1_i12	2039	NA	NA	+	TRINITY_DN893_c0_g1_i12	NA	NA	NA	CC	CC	GG	GG	CC	CC
	UTRINITY_DN2622_c0_g1_i2_561	G/A	TRINITY_DN2622_c0_g1_i2	561	NA	NA	+	TRINITY_DN2622_c0_g1_i2	NA	NA	NA	GG	GG	AA	AA	GG	GG
	UTRINITY_DN62370_c0_g1_i7_356	T/C	TRINITY_DN62370_c0_g1_i7	356	NA	NA	+	TRINITY_DN62370_c0_g1_i7	NA	NA	NA	TT	TT	TT	TT	CT	CT
	UTRINITY_DN730_c0_g1_i13_165	C/T	TRINITY_DN730_c0_g1_i13	165	NA	NA	+	TRINITY_DN730_c0_g1_i13	NA	NA	NA	CC	CC	CC	CC	TT	TT
	UTRINITY_DN730_c0_g1_i13_171	C/T	TRINITY_DN730_c0_g1_i13	171	NA	NA	+	TRINITY_DN730_c0_g1_i13	NA	NA	NA	CC	CC	CC	CC	TT	TT
	UTRINITY_DN23034_c0_g1_i7_1122	C/A	TRINITY_DN23034_c0_g1_i7	1122	NA	NA	+	TRINITY_DN23034_c0_g1_i7	NA	NA	NA	CC	CC	CC	CC	AA	AA
	UTRINITY_DN9295_c0_g1_i2_216	C/G	TRINITY_DN9295_c0_g1_i2	216	NA	NA	+	TRINITY_DN9295_c0_g1_i2	NA	NA	NA	CC	CC	GG	GG	--	--
	UTRINITY_DN52967_c0_g1_i1_380	C/T	TRINITY_DN52967_c0_g1_i1	380	NA	NA	+	TRINITY_DN52967_c0_g1_i1	NA	NA	NA	CC	CC	CC	CC	TT	TT
	UTRINITY_DN14101_c0_g1_i1_57	A/G	TRINITY_DN14101_c0_g1_i1	57	NA	NA	+	TRINITY_DN14101_c0_g1_i1	NA	NA	NA	GA	GA	GA	GA	AA	AA
	UTRINITY_DN14101_c0_g1_i1_76	G/A	TRINITY_DN14101_c0_g1_i1	76	NA	NA	+	TRINITY_DN14101_c0_g1_i1	NA	NA	NA	GG	GG	GG	GG	AA	AA
	UTRINITY_DN14101_c0_g1_i1_118	G/A	TRINITY_DN14101_c0_g1_i1	118	NA	NA	+	TRINITY_DN14101_c0_g1_i1	NA	NA	NA	GA	GA	GA	GA	GG	GG
	UTRINITY_DN14101_c0_g1_i1_120	G/A	TRINITY_DN14101_c0_g1_i1	120	NA	NA	+	TRINITY_DN14101_c0_g1_i1	NA	NA	NA	GA	GA	GA	GA	GG	GG
	UTRINITY_DN14101_c0_g1_i1_192	A/T	TRINITY_DN14101_c0_g1_i1	192	NA	NA	+	TRINITY_DN14101_c0_g1_i1	NA	NA	NA	AT	AT	AT	AT	AA	AA
	UTRINITY_DN14101_c0_g1_i1_295	A/T	TRINITY_DN14101_c0_g1_i1	295	NA	NA	+	TRINITY_DN14101_c0_g1_i1	NA	NA	NA	TA	TA	TA	TA	AA	AA
	UTRINITY_DN14101_c0_g1_i1_311	T/A	TRINITY_DN14101_c0_g1_i1	311	NA	NA	+	TRINITY_DN14101_c0_g1_i1	NA	NA	NA	AT	AT	AT	AT	TT	TT
	UTRINITY_DN14101_c0_g1_i1_403	G/C	TRINITY_DN14101_c0_g1_i1	403	NA	NA	+	TRINITY_DN14101_c0_g1_i1	NA	NA	NA	GC	GC	GC	GC	GG	GG
	UTRINITY_DN14101_c0_g1_i1_428	C/A	TRINITY_DN14101_c0_g1_i1	428	NA	NA	+	TRINITY_DN14101_c0_g1_i1	NA	NA	NA	CA	CA	CA	CA	CC	CC
	UTRINITY_DN14101_c0_g1_i1_473	T/A	TRINITY_DN14101_c0_g1_i1	473	NA	NA	+	TRINITY_DN14101_c0_g1_i1	NA	NA	NA	TA	TA	TA	TA	TT	TT
	UTRINITY_DN16334_c0_g1_i1_78	T/C	TRINITY_DN16334_c0_g1_i1	78	NA	NA	+	TRINITY_DN16334_c0_g1_i1	NA	NA	NA	--	--	TT	TT	TC	TC
	UTRINITY_DN12373_c0_g2_i2_50	A/T	TRINITY_DN12373_c0_g2_i2	50	NA	NA	+	TRINITY_DN12373_c0_g2_i2	NA	NA	NA	AT	AT	AA	AA	AA	AA
	UTRINITY_DN2672_c0_g1_i1_438	A/G	TRINITY_DN2672_c0_g1_i1	438	NA	NA	+	TRINITY_DN2672_c0_g1_i1	NA	NA	NA	GG	GG	AA	AA	AA	AA
	UTRINITY_DN15585_c0_g1_i9_170	T/G	TRINITY_DN15585_c0_g1_i9	170	NA	NA	+	TRINITY_DN15585_c0_g1_i9	NA	NA	NA	GG	GG	TT	TT	TT	TT
	UTRINITY_DN1581_c0_g1_i8_1200	A/G	TRINITY_DN1581_c0_g1_i8	1200	NA	NA	+	TRINITY_DN1581_c0_g1_i8	NA	NA	NA	AA	AA	AA	AA	GG	GG
	UTRINITY_DN1581_c0_g1_i8_1211	C/T	TRINITY_DN1581_c0_g1_i8	1211	NA	NA	+	TRINITY_DN1581_c0_g1_i8	NA	NA	NA	CC	CC	CC	CC	TT	TT
	UTRINITY_DN23961_c0_g2_i9_176	G/A	TRINITY_DN23961_c0_g2_i9	176	NA	NA	+	TRINITY_DN23961_c0_g2_i9	NA	NA	NA	GG	GG	GG	GG	AA	AA
	UTRINITY_DN23961_c0_g2_i9_178	C/G	TRINITY_DN23961_c0_g2_i9	178	NA	NA	+	TRINITY_DN23961_c0_g2_i9	NA	NA	NA	CC	CC	CC	CC	GG	GG
	UTRINITY_DN4520_c0_g1_i18_625	T/C	TRINITY_DN4520_c0_g1_i18	625	NA	NA	+	TRINITY_DN4520_c0_g1_i18	NA	NA	NA	TT	TT	TT	TT	CC	CC
	UTRINITY_DN4520_c0_g1_i18_637	C/T	TRINITY_DN4520_c0_g1_i18	637	NA	NA	+	TRINITY_DN4520_c0_g1_i18	NA	NA	NA	CC	CC	CC	CC	TT	TT
	UTRINITY_DN4520_c0_g1_i18_649	C/T	TRINITY_DN4520_c0_g1_i18	649	NA	NA	+	TRINITY_DN4520_c0_g1_i18	NA	NA	NA	CC	CC	CC	CC	TT	TT
	UTRINITY_DN10832_c2_g1_i6_789	G/A	TRINITY_DN10832_c2_g1_i6	789	NA	NA	+	TRINITY_DN10832_c2_g1_i6	NA	NA	NA	GG	GG	GG	GG	GA	GA
	UTRINITY_DN10832_c2_g1_i6_809	C/G	TRINITY_DN10832_c2_g1_i6	809	NA	NA	+	TRINITY_DN10832_c2_g1_i6	NA	NA	NA	CC	CC	CC	CC	CG	CG
	UTRINITY_DN10832_c2_g1_i6_858	A/G	TRINITY_DN10832_c2_g1_i6	858	NA	NA	+	TRINITY_DN10832_c2_g1_i6	NA	NA	NA	AG	AG	AG	AG	AA	AA
	UTRINITY_DN10832_c2_g1_i6_888	T/C	TRINITY_DN10832_c2_g1_i6	888	NA	NA	+	TRINITY_DN10832_c2_g1_i6	NA	NA	NA	TT	TT	TT	TT	TC	TC
	UTRINITY_DN10832_c2_g1_i6_1104	C/T	TRINITY_DN10832_c2_g1_i6	1104	NA	NA	+	TRINITY_DN10832_c2_g1_i6	NA	NA	NA	CC	CC	CC	CC	CT	CT
	UTRINITY_DN10832_c2_g1_i6_1146	A/T	TRINITY_DN10832_c2_g1_i6	1146	NA	NA	+	TRINITY_DN10832_c2_g1_i6	NA	NA	NA	AA	AA	AT	AT	AT	AT
	UTRINITY_DN11765_c0_g1_i9_1286	A/G	TRINITY_DN11765_c0_g1_i9	1286	NA	NA	+	TRINITY_DN11765_c0_g1_i9	NA	NA	NA	AA	AA	AA	AA	GG	GG
	UTRINITY_DN11765_c0_g1_i9_1299	T/C	TRINITY_DN11765_c0_g1_i9	1299	NA	NA	+	TRINITY_DN11765_c0_g1_i9	NA	NA	NA	TT	TT	TT	TT	CC	CC
	UTRINITY_DN7329_c0_g2_i1_904	C/T	TRINITY_DN7329_c0_g2_i1	904	NA	NA	+	TRINITY_DN7329_c0_g2_i1	NA	NA	NA	CC	CC	CC	CC	TT	TT
	UTRINITY_DN1119_c0_g1_i5_1429	G/A	TRINITY_DN1119_c0_g1_i5	1429	NA	NA	+	TRINITY_DN1119_c0_g1_i5	NA	NA	NA	GG	GG	GG	GG	AA	AA
	UTRINITY_DN1119_c0_g1_i5_1463	A/G	TRINITY_DN1119_c0_g1_i5	1463	NA	NA	+	TRINITY_DN1119_c0_g1_i5	NA	NA	NA	AA	AA	AA	AA	GG	GG
	UTRINITY_DN19471_c0_g1_i6_314	G/A	TRINITY_DN19471_c0_g1_i6	314	NA	NA	+	TRINITY_DN19471_c0_g1_i6	NA	NA	NA	GG	GG	GG	GG	AA	AA
	UTRINITY_DN19471_c0_g1_i6_333	C/A	TRINITY_DN19471_c0_g1_i6	333	NA	NA	+	TRINITY_DN19471_c0_g1_i6	NA	NA	NA	CC	CC	CC	CC	AA	AA
	UTRINITY_DN10431_c0_g1_i1_182	T/C	TRINITY_DN10431_c0_g1_i1	182	NA	NA	+	TRINITY_DN10431_c0_g1_i1	NA	NA	NA	TC	TC	TC	TC	TT	TT
	UTRINITY_DN10431_c0_g1_i1_232	G/A	TRINITY_DN10431_c0_g1_i1	232	NA	NA	+	TRINITY_DN10431_c0_g1_i1	NA	NA	NA	GA	GA	GA	GA	GG	GG
	UTRINITY_DN1940_c0_g2_i2_459	G/A	TRINITY_DN1940_c0_g2_i2	459	NA	NA	+	TRINITY_DN1940_c0_g2_i2	NA	NA	NA	GA	GA	GG	GG	GG	GG
	UTRINITY_DN1648_c0_g1_i1_1639	T/C	TRINITY_DN1648_c0_g1_i1	1639	NA	NA	+	TRINITY_DN1648_c0_g1_i1	NA	NA	NA	TT	TT	TT	TT	CC	CC
	UTRINITY_DN1648_c0_g1_i1_1978	C/G	TRINITY_DN1648_c0_g1_i1	1978	NA	NA	+	TRINITY_DN1648_c0_g1_i1	NA	NA	NA	CC	CC	CC	CC	GG	GG
	UTRINITY_DN1648_c0_g1_i1_2089	C/T	TRINITY_DN1648_c0_g1_i1	2089	NA	NA	+	TRINITY_DN1648_c0_g1_i1	NA	NA	NA	CC	CC	CC	CC	TT	TT
	UTRINITY_DN1648_c0_g1_i1_2093	G/A	TRINITY_DN1648_c0_g1_i1	2093	NA	NA	+	TRINITY_DN1648_c0_g1_i1	NA	NA	NA	GG	GG	GG	GG	AA	AA
	UTRINITY_DN10601_c0_g1_i1_364	C/T	TRINITY_DN10601_c0_g1_i1	364	NA	NA	+	TRINITY_DN10601_c0_g1_i1	NA	NA	NA	CC	CC	CC	CC	TT	TT
	UTRINITY_DN10601_c0_g1_i1_376	T/C	TRINITY_DN10601_c0_g1_i1	376	NA	NA	+	TRINITY_DN10601_c0_g1_i1	NA	NA	NA	TT	TT	TT	TT	CC	CC
	UTRINITY_DN10601_c0_g1_i1_481	T/C	TRINITY_DN10601_c0_g1_i1	481	NA	NA	+	TRINITY_DN10601_c0_g1_i1	NA	NA	NA	TT	TT	TT	TT	CC	CC
	UTRINITY_DN15270_c0_g1_i3_545	G/A	TRINITY_DN15270_c0_g1_i3	545	NA	NA	+	TRINITY_DN15270_c0_g1_i3	NA	NA	NA	GG	GG	AA	AA	GG	GG
	UTRINITY_DN23223_c0_g1_i14_1364	T/C	TRINITY_DN23223_c0_g1_i14	1364	NA	NA	+	TRINITY_DN23223_c0_g1_i14	NA	NA	NA	CC	CC	TT	TT	TT	TT
	UTRINITY_DN21336_c0_g1_i1_481	A/C	TRINITY_DN21336_c0_g1_i1	481	NA	NA	+	TRINITY_DN21336_c0_g1_i1	NA	NA	NA	AA	AA	AC	AC	AA	AA
	UTRINITY_DN31572_c0_g1_i1_75	T/C	TRINITY_DN31572_c0_g1_i1	75	NA	NA	+	TRINITY_DN31572_c0_g1_i1	NA	NA	NA	TT	TT	TT	TT	CC	CC
	UTRINITY_DN31572_c0_g1_i1_150	T/C	TRINITY_DN31572_c0_g1_i1	150	NA	NA	+	TRINITY_DN31572_c0_g1_i1	NA	NA	NA	TT	TT	TT	TT	CC	CC
	UTRINITY_DN15738_c0_g1_i3_730	T/G	TRINITY_DN15738_c0_g1_i3	730	NA	NA	+	TRINITY_DN15738_c0_g1_i3	NA	NA	NA	TG	TG	TG	TG	TT	TT
	UTRINITY_DN6881_c0_g1_i6_250	G/T	TRINITY_DN6881_c0_g1_i6	250	NA	NA	+	TRINITY_DN6881_c0_g1_i6	NA	NA	NA	TT	TT	GG	GG	GG	GG
	UTRINITY_DN1905_c0_g1_i9_860	T/C	TRINITY_DN1905_c0_g1_i9	860	NA	NA	+	TRINITY_DN1905_c0_g1_i9	NA	NA	NA	TT	TT	CC	CC	TT	TT
	UTRINITY_DN6491_c1_g1_i2_29	G/A	TRINITY_DN6491_c1_g1_i2	29	NA	NA	+	TRINITY_DN6491_c1_g1_i2	NA	NA	NA	GG	GG	AA	AA	GG	GG
	UTRINITY_DN6491_c1_g1_i2_197	G/C	TRINITY_DN6491_c1_g1_i2	197	NA	NA	+	TRINITY_DN6491_c1_g1_i2	NA	NA	NA	GG	GG	GG	GG	CC	CC
	UTRINITY_DN2095_c0_g1_i10_1542	G/A	TRINITY_DN2095_c0_g1_i10	1542	NA	NA	+	TRINITY_DN2095_c0_g1_i10	NA	NA	NA	GG	GG	GG	GG	AA	AA
	UTRINITY_DN2426_c0_g1_i1_652	G/C	TRINITY_DN2426_c0_g1_i1	652	NA	NA	+	TRINITY_DN2426_c0_g1_i1	NA	NA	NA	GG	GG	GC	GC	GG	GG
	UTRINITY_DN2698_c0_g1_i6_701	A/G	TRINITY_DN2698_c0_g1_i6	701	NA	NA	+	TRINITY_DN2698_c0_g1_i6	NA	NA	NA	AA	AA	AA	AA	GG	GG
	UTRINITY_DN7736_c0_g1_i7_1229	G/C	TRINITY_DN7736_c0_g1_i7	1229	NA	NA	+	TRINITY_DN7736_c0_g1_i7	NA	NA	NA	GG	GG	GG	GG	CC	CC
	UTRINITY_DN1405_c0_g1_i4_528	G/C	TRINITY_DN1405_c0_g1_i4	528	NA	NA	+	TRINITY_DN1405_c0_g1_i4	NA	NA	NA	GG	GG	CC	CC	GG	GG
	UTRINITY_DN38846_c0_g1_i3_268	A/C	TRINITY_DN38846_c0_g1_i3	268	NA	NA	+	TRINITY_DN38846_c0_g1_i3	NA	NA	NA	--	--	CC	CC	AA	AA
	UTRINITY_DN38846_c0_g1_i3_269	T/G	TRINITY_DN38846_c0_g1_i3	269	NA	NA	+	TRINITY_DN38846_c0_g1_i3	NA	NA	NA	--	--	TT	TT	GG	GG
	UTRINITY_DN65_c0_g2_i1_185	A/C	TRINITY_DN65_c0_g2_i1	185	NA	NA	+	TRINITY_DN65_c0_g2_i1	NA	NA	NA	AA	AA	AA	AA	AC	AC
	UTRINITY_DN10336_c0_g1_i2_116	C/T	TRINITY_DN10336_c0_g1_i2	116	NA	NA	+	TRINITY_DN10336_c0_g1_i2	NA	NA	NA	TT	TT	CC	CC	CC	CC
	UTRINITY_DN10336_c0_g1_i2_137	A/T	TRINITY_DN10336_c0_g1_i2	137	NA	NA	+	TRINITY_DN10336_c0_g1_i2	NA	NA	NA	TT	TT	AA	AA	AA	AA
	UTRINITY_DN3069_c0_g1_i5_240	T/C	TRINITY_DN3069_c0_g1_i5	240	NA	NA	+	TRINITY_DN3069_c0_g1_i5	NA	NA	NA	TT	TT	TT	TT	CC	CC
	UTRINITY_DN3069_c0_g1_i5_241	G/A	TRINITY_DN3069_c0_g1_i5	241	NA	NA	+	TRINITY_DN3069_c0_g1_i5	NA	NA	NA	GG	GG	GG	GG	AA	AA
	UTRINITY_DN1725_c0_g1_i14_1161	C/T	TRINITY_DN1725_c0_g1_i14	1161	NA	NA	+	TRINITY_DN1725_c0_g1_i14	NA	NA	NA	TT	TT	CC	CC	CC	CC
	UTRINITY_DN2755_c0_g1_i5_571	C/T	TRINITY_DN2755_c0_g1_i5	571	NA	NA	+	TRINITY_DN2755_c0_g1_i5	NA	NA	NA	TT	TT	CC	CC	CC	CC
	UTRINITY_DN15156_c0_g3_i2_271	A/G	TRINITY_DN15156_c0_g3_i2	271	NA	NA	+	TRINITY_DN15156_c0_g3_i2	NA	NA	NA	AA	AA	AA	AA	GG	GG
	UTRINITY_DN15156_c0_g3_i2_809	A/G	TRINITY_DN15156_c0_g3_i2	809	NA	NA	+	TRINITY_DN15156_c0_g3_i2	NA	NA	NA	AA	AA	AA	AA	GG	GG
	UTRINITY_DN4840_c0_g1_i12_256	C/A	TRINITY_DN4840_c0_g1_i12	256	NA	NA	+	TRINITY_DN4840_c0_g1_i12	NA	NA	NA	CC	CC	CC	CC	AA	AA
	UTRINITY_DN8323_c0_g1_i3_128	A/G	TRINITY_DN8323_c0_g1_i3	128	NA	NA	+	TRINITY_DN8323_c0_g1_i3	NA	NA	NA	AA	AA	AA	AA	GG	GG
	UTRINITY_DN8323_c0_g1_i3_130	T/G	TRINITY_DN8323_c0_g1_i3	130	NA	NA	+	TRINITY_DN8323_c0_g1_i3	NA	NA	NA	TT	TT	TT	TT	GG	GG
	UTRINITY_DN8323_c0_g1_i3_138	G/A	TRINITY_DN8323_c0_g1_i3	138	NA	NA	+	TRINITY_DN8323_c0_g1_i3	NA	NA	NA	GG	GG	GG	GG	AA	AA
	UTRINITY_DN8323_c0_g1_i3_146	T/G	TRINITY_DN8323_c0_g1_i3	146	NA	NA	+	TRINITY_DN8323_c0_g1_i3	NA	NA	NA	TT	TT	TT	TT	GG	GG
	UTRINITY_DN8323_c0_g1_i3_831	G/A	TRINITY_DN8323_c0_g1_i3	831	NA	NA	+	TRINITY_DN8323_c0_g1_i3	NA	NA	NA	GG	GG	GG	GG	GA	GA
	UTRINITY_DN8323_c0_g1_i3_843	A/G	TRINITY_DN8323_c0_g1_i3	843	NA	NA	+	TRINITY_DN8323_c0_g1_i3	NA	NA	NA	AG	AG	AA	AA	AA	AA
	UTRINITY_DN8323_c0_g1_i3_849	G/A	TRINITY_DN8323_c0_g1_i3	849	NA	NA	+	TRINITY_DN8323_c0_g1_i3	NA	NA	NA	GA	GA	GG	GG	GG	GG
	UTRINITY_DN8323_c0_g1_i3_1081	A/C	TRINITY_DN8323_c0_g1_i3	1081	NA	NA	+	TRINITY_DN8323_c0_g1_i3	NA	NA	NA	CC	CC	AA	AA	AA	AA
	UTRINITY_DN8323_c0_g1_i3_1083	G/A	TRINITY_DN8323_c0_g1_i3	1083	NA	NA	+	TRINITY_DN8323_c0_g1_i3	NA	NA	NA	AA	AA	GG	GG	GG	GG
	UTRINITY_DN23193_c0_g1_i6_2132	T/C	TRINITY_DN23193_c0_g1_i6	2132	NA	NA	+	TRINITY_DN23193_c0_g1_i6	NA	NA	NA	CC	CC	TT	TT	TT	TT
	UTRINITY_DN9192_c0_g1_i5_463	T/C	TRINITY_DN9192_c0_g1_i5	463	NA	NA	+	TRINITY_DN9192_c0_g1_i5	NA	NA	NA	TT	TT	TT	TT	CC	CC
	UTRINITY_DN9192_c0_g1_i5_508	A/G	TRINITY_DN9192_c0_g1_i5	508	NA	NA	+	TRINITY_DN9192_c0_g1_i5	NA	NA	NA	AA	AA	AA	AA	GG	GG
	UTRINITY_DN5937_c0_g1_i12_454	A/G	TRINITY_DN5937_c0_g1_i12	454	NA	NA	+	TRINITY_DN5937_c0_g1_i12	NA	NA	NA	AA	AA	AA	AA	GG	GG
	UTRINITY_DN5937_c0_g1_i12_458	A/G	TRINITY_DN5937_c0_g1_i12	458	NA	NA	+	TRINITY_DN5937_c0_g1_i12	NA	NA	NA	AA	AA	AA	AA	GG	GG
	UTRINITY_DN23003_c0_g1_i4_628	A/G	TRINITY_DN23003_c0_g1_i4	628	NA	NA	+	TRINITY_DN23003_c0_g1_i4	NA	NA	NA	AA	AA	AA	AA	GG	GG
	UTRINITY_DN23003_c0_g1_i4_810	C/T	TRINITY_DN23003_c0_g1_i4	810	NA	NA	+	TRINITY_DN23003_c0_g1_i4	NA	NA	NA	CC	CC	CC	CC	CT	CT
	UTRINITY_DN4189_c1_g1_i2_998	T/C	TRINITY_DN4189_c1_g1_i2	998	NA	NA	+	TRINITY_DN4189_c1_g1_i2	NA	NA	NA	CC	CC	TT	TT	TT	TT
	UTRINITY_DN21868_c1_g1_i6_436	G/A	TRINITY_DN21868_c1_g1_i6	436	NA	NA	+	TRINITY_DN21868_c1_g1_i6	NA	NA	NA	GG	GG	AA	AA	GG	GG
	UTRINITY_DN25606_c3_g1_i1_65	A/T	TRINITY_DN25606_c3_g1_i1	65	NA	NA	+	TRINITY_DN25606_c3_g1_i1	NA	NA	NA	TT	TT	AA	AA	AA	AA
	UTRINITY_DN25606_c3_g1_i1_80	T/A	TRINITY_DN25606_c3_g1_i1	80	NA	NA	+	TRINITY_DN25606_c3_g1_i1	NA	NA	NA	AA	AA	TT	TT	TT	TT
	UTRINITY_DN25606_c3_g1_i1_85	C/T	TRINITY_DN25606_c3_g1_i1	85	NA	NA	+	TRINITY_DN25606_c3_g1_i1	NA	NA	NA	TT	TT	CC	CC	CC	CC
	UTRINITY_DN19119_c0_g1_i12_92	C/T	TRINITY_DN19119_c0_g1_i12	92	NA	NA	+	TRINITY_DN19119_c0_g1_i12	NA	NA	NA	CC	CC	CC	CC	TT	TT
	UTRINITY_DN1269_c0_g1_i1_764	G/A	TRINITY_DN1269_c0_g1_i1	764	NA	NA	+	TRINITY_DN1269_c0_g1_i1	NA	NA	NA	GA	GA	GA	GA	GG	GG
	UTRINITY_DN2649_c0_g1_i5_199	T/C	TRINITY_DN2649_c0_g1_i5	199	NA	NA	+	TRINITY_DN2649_c0_g1_i5	NA	NA	NA	TT	TT	TT	TT	CC	CC
	UTRINITY_DN535_c0_g1_i3_1525	G/C	TRINITY_DN535_c0_g1_i3	1525	NA	NA	+	TRINITY_DN535_c0_g1_i3	NA	NA	NA	GG	GG	GG	GG	CC	CC
	UTRINITY_DN18747_c2_g1_i2_71	T/G	TRINITY_DN18747_c2_g1_i2	71	NA	NA	+	TRINITY_DN18747_c2_g1_i2	NA	NA	NA	GG	GG	TT	TT	TT	TT
	UTRINITY_DN18747_c2_g1_i2_78	G/A	TRINITY_DN18747_c2_g1_i2	78	NA	NA	+	TRINITY_DN18747_c2_g1_i2	NA	NA	NA	AA	AA	GG	GG	GG	GG
	UTRINITY_DN3251_c1_g2_i2_1132	G/A	TRINITY_DN3251_c1_g2_i2	1132	NA	NA	+	TRINITY_DN3251_c1_g2_i2	NA	NA	NA	GG	GG	GG	GG	AA	AA
	UTRINITY_DN8079_c0_g1_i2_915	G/A	TRINITY_DN8079_c0_g1_i2	915	NA	NA	+	TRINITY_DN8079_c0_g1_i2	NA	NA	NA	AA	AA	GG	GG	GG	GG
	UTRINITY_DN8079_c0_g1_i2_918	C/A	TRINITY_DN8079_c0_g1_i2	918	NA	NA	+	TRINITY_DN8079_c0_g1_i2	NA	NA	NA	AA	AA	CC	CC	CC	CC
	UTRINITY_DN10390_c0_g1_i2_5762	C/G	TRINITY_DN10390_c0_g1_i2	5762	NA	NA	+	TRINITY_DN10390_c0_g1_i2	NA	NA	NA	CC	CC	CC	CC	GG	GG
	UTRINITY_DN1789_c0_g1_i1_465	G/T	TRINITY_DN1789_c0_g1_i1	465	NA	NA	+	TRINITY_DN1789_c0_g1_i1	NA	NA	NA	GG	GG	GG	GG	TT	TT
	UTRINITY_DN1789_c0_g1_i1_467	T/C	TRINITY_DN1789_c0_g1_i1	467	NA	NA	+	TRINITY_DN1789_c0_g1_i1	NA	NA	NA	TT	TT	TT	TT	CC	CC
	UTRINITY_DN132261_c1_g1_i1_156	T/A	TRINITY_DN132261_c1_g1_i1	156	NA	NA	+	TRINITY_DN132261_c1_g1_i1	NA	NA	NA	TT	TT	TT	TT	AA	AA
	UTRINITY_DN132261_c1_g1_i1_166	C/T	TRINITY_DN132261_c1_g1_i1	166	NA	NA	+	TRINITY_DN132261_c1_g1_i1	NA	NA	NA	CC	CC	CC	CC	TT	TT
	UTRINITY_DN18682_c0_g3_i1_142	C/G	TRINITY_DN18682_c0_g3_i1	142	NA	NA	+	TRINITY_DN18682_c0_g3_i1	NA	NA	NA	CG	CG	CC	CC	CG	CG
	UTRINITY_DN67522_c0_g1_i2_172	C/T	TRINITY_DN67522_c0_g1_i2	172	NA	NA	+	TRINITY_DN67522_c0_g1_i2	NA	NA	NA	CC	CC	CC	CC	TT	TT
	UTRINITY_DN3144_c0_g1_i3_1038	G/A	TRINITY_DN3144_c0_g1_i3	1038	NA	NA	+	TRINITY_DN3144_c0_g1_i3	NA	NA	NA	GG	GG	AA	AA	GG	GG
	UTRINITY_DN16020_c0_g1_i8_4709	G/A	TRINITY_DN16020_c0_g1_i8	4709	NA	NA	+	TRINITY_DN16020_c0_g1_i8	NA	NA	NA	GG	GG	GG	GG	AA	AA
	UTRINITY_DN12330_c0_g2_i1_25	C/G	TRINITY_DN12330_c0_g2_i1	25	NA	NA	+	TRINITY_DN12330_c0_g2_i1	NA	NA	NA	GC	GC	GG	GG	CC	CC
	UTRINITY_DN12330_c0_g2_i1_112	C/G	TRINITY_DN12330_c0_g2_i1	112	NA	NA	+	TRINITY_DN12330_c0_g2_i1	NA	NA	NA	GC	GC	GG	GG	CC	CC
	UTRINITY_DN12330_c0_g2_i1_127	C/T	TRINITY_DN12330_c0_g2_i1	127	NA	NA	+	TRINITY_DN12330_c0_g2_i1	NA	NA	NA	CC	CC	CC	CC	CT	CT
	UTRINITY_DN12330_c0_g2_i1_139	C/G	TRINITY_DN12330_c0_g2_i1	139	NA	NA	+	TRINITY_DN12330_c0_g2_i1	NA	NA	NA	CG	CG	CC	CC	CG	CG
	UTRINITY_DN12330_c0_g2_i1_190	G/C	TRINITY_DN12330_c0_g2_i1	190	NA	NA	+	TRINITY_DN12330_c0_g2_i1	NA	NA	NA	GG	GG	GG	GG	GC	GC
	UTRINITY_DN12330_c0_g2_i1_256	A/C	TRINITY_DN12330_c0_g2_i1	256	NA	NA	+	TRINITY_DN12330_c0_g2_i1	NA	NA	NA	CA	CA	AA	AA	CC	CC
[truncated: 38,702 more rows]

## Sheet: SNPs_RD10
	Insight into the mechanisms of terminal HS-tolerance in wheat mutant with improved nutritional quality through de novo transcriptome sequencing Ranjeet R. Kumar, Suman Bakshi, Kavita Dubey, Sumedha Hasija, Gyanendra K. Rai, Neelu Jain, Sanjay Jambhulkar, Bhupinder Singh, Gyanendra P. Singh, & Shelly Praveen
	Table S15 List of Single Nucleotide Polymorphisms (SNPs) overlying on differentially expressed transcripts identified in wheat mutant (M3), parent (P3) and mutant exposed to HS (M3H) through de novo transcriptomic sequencing
	rs#	alleles	chrom	pos	GenBankID	RefSeqID	strand	clusterID	center	panel	QCcode	M3HSLR1_M3HSRR2_M3HSSR1_M3HSSpR1	M3HSLR2_M3HSRR2_M3HSSR2_M3HSSpR2	M3LR2_M3RR1_M3SR1_M3SpR1	M3LR2_M3RR2_M3SR2_M3SpR2	P3LR1_P3RR1_P3SR1_P3SpR1	P3LR2_P3RR2_P3SR2_P3SpR2
	UTRINITY_DN7591_c0_g1_i1_215	C/A	TRINITY_DN7591_c0_g1_i1	215	NA	NA	+	TRINITY_DN7591_c0_g1_i1	NA	NA	NA	CC	CC	CA	CA	CA	CA
	UTRINITY_DN3581_c0_g1_i5_963	T/C	TRINITY_DN3581_c0_g1_i5	963	NA	NA	+	TRINITY_DN3581_c0_g1_i5	NA	NA	NA	TT	TT	CC	CC	TT	TT
	UTRINITY_DN6631_c0_g1_i2_631	G/C	TRINITY_DN6631_c0_g1_i2	631	NA	NA	+	TRINITY_DN6631_c0_g1_i2	NA	NA	NA	GG	GG	GG	GG	CC	CC
	UTRINITY_DN50262_c0_g1_i1_169	C/G	TRINITY_DN50262_c0_g1_i1	169	NA	NA	+	TRINITY_DN50262_c0_g1_i1	NA	NA	NA	GG	GG	GC	GC	CC	CC
	UTRINITY_DN50262_c0_g1_i1_174	A/T	TRINITY_DN50262_c0_g1_i1	174	NA	NA	+	TRINITY_DN50262_c0_g1_i1	NA	NA	NA	AA	AA	AT	AT	AA	AA
	UTRINITY_DN50262_c0_g1_i1_177	G/A	TRINITY_DN50262_c0_g1_i1	177	NA	NA	+	TRINITY_DN50262_c0_g1_i1	NA	NA	NA	GG	GG	GA	GA	GG	GG
	UTRINITY_DN50262_c0_g1_i1_188	G/T	TRINITY_DN50262_c0_g1_i1	188	NA	NA	+	TRINITY_DN50262_c0_g1_i1	NA	NA	NA	GG	GG	GT	GT	GG	GG
	UTRINITY_DN50262_c0_g1_i1_189	T/C	TRINITY_DN50262_c0_g1_i1	189	NA	NA	+	TRINITY_DN50262_c0_g1_i1	NA	NA	NA	TT	TT	TC	TC	TT	TT
	UTRINITY_DN50262_c0_g1_i1_315	A/T	TRINITY_DN50262_c0_g1_i1	315	NA	NA	+	TRINITY_DN50262_c0_g1_i1	NA	NA	NA	AA	AA	TA	TA	TA	TA
	UTRINITY_DN2666_c0_g1_i1_1028	G/T	TRINITY_DN2666_c0_g1_i1	1028	NA	NA	+	TRINITY_DN2666_c0_g1_i1	NA	NA	NA	GG	GG	GG	GG	TT	TT
	UTRINITY_DN41254_c0_g2_i1_142	C/G	TRINITY_DN41254_c0_g2_i1	142	NA	NA	+	TRINITY_DN41254_c0_g2_i1	NA	NA	NA	CC	CC	CC	CC	GG	GG
	UTRINITY_DN4859_c0_g1_i3_1886	T/C	TRINITY_DN4859_c0_g1_i3	1886	NA	NA	+	TRINITY_DN4859_c0_g1_i3	NA	NA	NA	CC	CC	TT	TT	TT	TT
	UTRINITY_DN7547_c0_g1_i1_415	C/G	TRINITY_DN7547_c0_g1_i1	415	NA	NA	+	TRINITY_DN7547_c0_g1_i1	NA	NA	NA	CC	CC	CC	CC	GG	GG
	UTRINITY_DN7547_c0_g1_i1_418	A/T	TRINITY_DN7547_c0_g1_i1	418	NA	NA	+	TRINITY_DN7547_c0_g1_i1	NA	NA	NA	AA	AA	AA	AA	TT	TT
	UTRINITY_DN15410_c0_g1_i8_234	T/G	TRINITY_DN15410_c0_g1_i8	234	NA	NA	+	TRINITY_DN15410_c0_g1_i8	NA	NA	NA	TT	TT	GG	GG	TT	TT
	UTRINITY_DN2856_c0_g1_i3_261	T/C	TRINITY_DN2856_c0_g1_i3	261	NA	NA	+	TRINITY_DN2856_c0_g1_i3	NA	NA	NA	TT	TT	TT	TT	CC	CC
	UTRINITY_DN3289_c3_g1_i4_112	T/C	TRINITY_DN3289_c3_g1_i4	112	NA	NA	+	TRINITY_DN3289_c3_g1_i4	NA	NA	NA	TT	TT	TT	TT	CC	CC
	UTRINITY_DN3289_c3_g1_i4_253	C/G	TRINITY_DN3289_c3_g1_i4	253	NA	NA	+	TRINITY_DN3289_c3_g1_i4	NA	NA	NA	GG	GG	CC	CC	CC	CC
	UTRINITY_DN25805_c0_g1_i1_421	G/T	TRINITY_DN25805_c0_g1_i1	421	NA	NA	+	TRINITY_DN25805_c0_g1_i1	NA	NA	NA	GT	GT	GT	GT	GG	GG
	UTRINITY_DN9038_c0_g1_i5_652	T/C	TRINITY_DN9038_c0_g1_i5	652	NA	NA	+	TRINITY_DN9038_c0_g1_i5	NA	NA	NA	TT	TT	TT	TT	CC	CC
	UTRINITY_DN4218_c0_g1_i6_1601	A/C	TRINITY_DN4218_c0_g1_i6	1601	NA	NA	+	TRINITY_DN4218_c0_g1_i6	NA	NA	NA	AA	AA	CC	CC	AA	AA
	UTRINITY_DN3711_c0_g1_i7_1080	C/T	TRINITY_DN3711_c0_g1_i7	1080	NA	NA	+	TRINITY_DN3711_c0_g1_i7	NA	NA	NA	CC	CC	CC	CC	TT	TT
	UTRINITY_DN11554_c0_g1_i1_455	C/G	TRINITY_DN11554_c0_g1_i1	455	NA	NA	+	TRINITY_DN11554_c0_g1_i1	NA	NA	NA	CC	CC	CC	CC	GG	GG
	UTRINITY_DN11554_c0_g1_i1_456	T/G	TRINITY_DN11554_c0_g1_i1	456	NA	NA	+	TRINITY_DN11554_c0_g1_i1	NA	NA	NA	TT	TT	TT	TT	GG	GG
	UTRINITY_DN13803_c1_g3_i2_259	C/G	TRINITY_DN13803_c1_g3_i2	259	NA	NA	+	TRINITY_DN13803_c1_g3_i2	NA	NA	NA	--	--	GG	GG	CC	CC
	UTRINITY_DN13803_c1_g3_i2_266	T/G	TRINITY_DN13803_c1_g3_i2	266	NA	NA	+	TRINITY_DN13803_c1_g3_i2	NA	NA	NA	--	--	GG	GG	TT	TT
	UTRINITY_DN7609_c0_g1_i2_2432	C/T	TRINITY_DN7609_c0_g1_i2	2432	NA	NA	+	TRINITY_DN7609_c0_g1_i2	NA	NA	NA	CC	CC	TT	TT	CC	CC
	UTRINITY_DN6374_c0_g1_i3_515	A/G	TRINITY_DN6374_c0_g1_i3	515	NA	NA	+	TRINITY_DN6374_c0_g1_i3	NA	NA	NA	AA	AA	AA	AA	GG	GG
	UTRINITY_DN14475_c0_g1_i1_343	A/G	TRINITY_DN14475_c0_g1_i1	343	NA	NA	+	TRINITY_DN14475_c0_g1_i1	NA	NA	NA	GA	GA	GA	GA	AA	AA
	UTRINITY_DN14475_c0_g1_i1_400	A/T	TRINITY_DN14475_c0_g1_i1	400	NA	NA	+	TRINITY_DN14475_c0_g1_i1	NA	NA	NA	TA	TA	TA	TA	AA	AA
	UTRINITY_DN14475_c0_g1_i1_422	T/C	TRINITY_DN14475_c0_g1_i1	422	NA	NA	+	TRINITY_DN14475_c0_g1_i1	NA	NA	NA	CT	CT	CT	CT	TT	TT
	UTRINITY_DN14475_c0_g1_i1_507	C/T	TRINITY_DN14475_c0_g1_i1	507	NA	NA	+	TRINITY_DN14475_c0_g1_i1	NA	NA	NA	TC	TC	TC	TC	CC	CC
	UTRINITY_DN14475_c0_g1_i1_586	C/T	TRINITY_DN14475_c0_g1_i1	586	NA	NA	+	TRINITY_DN14475_c0_g1_i1	NA	NA	NA	TC	TC	TC	TC	CC	CC
	UTRINITY_DN14475_c0_g1_i1_589	G/A	TRINITY_DN14475_c0_g1_i1	589	NA	NA	+	TRINITY_DN14475_c0_g1_i1	NA	NA	NA	AG	AG	AG	AG	GG	GG
	UTRINITY_DN14475_c0_g1_i1_600	A/G	TRINITY_DN14475_c0_g1_i1	600	NA	NA	+	TRINITY_DN14475_c0_g1_i1	NA	NA	NA	GA	GA	GA	GA	AA	AA
	UTRINITY_DN14475_c0_g1_i1_664	C/G	TRINITY_DN14475_c0_g1_i1	664	NA	NA	+	TRINITY_DN14475_c0_g1_i1	NA	NA	NA	GC	GC	GC	GC	CC	CC
	UTRINITY_DN14475_c0_g1_i1_727	C/G	TRINITY_DN14475_c0_g1_i1	727	NA	NA	+	TRINITY_DN14475_c0_g1_i1	NA	NA	NA	GC	GC	GC	GC	CC	CC
	UTRINITY_DN14475_c0_g1_i1_844	C/T	TRINITY_DN14475_c0_g1_i1	844	NA	NA	+	TRINITY_DN14475_c0_g1_i1	NA	NA	NA	TC	TC	TC	TC	CC	CC
	UTRINITY_DN14475_c0_g1_i1_860	T/A	TRINITY_DN14475_c0_g1_i1	860	NA	NA	+	TRINITY_DN14475_c0_g1_i1	NA	NA	NA	AT	AT	AT	AT	TT	TT
	UTRINITY_DN14475_c0_g1_i1_864	C/T	TRINITY_DN14475_c0_g1_i1	864	NA	NA	+	TRINITY_DN14475_c0_g1_i1	NA	NA	NA	TC	TC	TC	TC	CC	CC
	UTRINITY_DN14475_c0_g1_i1_865	T/G	TRINITY_DN14475_c0_g1_i1	865	NA	NA	+	TRINITY_DN14475_c0_g1_i1	NA	NA	NA	GT	GT	GT	GT	TT	TT
	UTRINITY_DN14475_c0_g1_i1_889	C/A	TRINITY_DN14475_c0_g1_i1	889	NA	NA	+	TRINITY_DN14475_c0_g1_i1	NA	NA	NA	AC	AC	AC	AC	CC	CC
	UTRINITY_DN14475_c0_g1_i1_947	T/A	TRINITY_DN14475_c0_g1_i1	947	NA	NA	+	TRINITY_DN14475_c0_g1_i1	NA	NA	NA	TT	TT	TT	TT	AA	AA
	UTRINITY_DN14475_c0_g1_i1_975	T/C	TRINITY_DN14475_c0_g1_i1	975	NA	NA	+	TRINITY_DN14475_c0_g1_i1	NA	NA	NA	CT	CT	CT	CT	TT	TT
	UTRINITY_DN14475_c0_g1_i1_1038	A/C	TRINITY_DN14475_c0_g1_i1	1038	NA	NA	+	TRINITY_DN14475_c0_g1_i1	NA	NA	NA	CA	CA	CA	CA	AA	AA
	UTRINITY_DN14475_c0_g1_i1_1063	C/T	TRINITY_DN14475_c0_g1_i1	1063	NA	NA	+	TRINITY_DN14475_c0_g1_i1	NA	NA	NA	TC	TC	TC	TC	CC	CC
	UTRINITY_DN14475_c0_g1_i1_1235	C/T	TRINITY_DN14475_c0_g1_i1	1235	NA	NA	+	TRINITY_DN14475_c0_g1_i1	NA	NA	NA	TC	TC	TC	TC	CC	CC
	UTRINITY_DN14475_c0_g1_i1_1314	A/G	TRINITY_DN14475_c0_g1_i1	1314	NA	NA	+	TRINITY_DN14475_c0_g1_i1	NA	NA	NA	GA	GA	GA	GA	AA	AA
	UTRINITY_DN14475_c0_g1_i1_1341	T/C	TRINITY_DN14475_c0_g1_i1	1341	NA	NA	+	TRINITY_DN14475_c0_g1_i1	NA	NA	NA	CT	CT	CT	CT	TT	TT
	UTRINITY_DN14475_c0_g1_i1_1382	C/G	TRINITY_DN14475_c0_g1_i1	1382	NA	NA	+	TRINITY_DN14475_c0_g1_i1	NA	NA	NA	GG	GG	GC	GC	CC	CC
	UTRINITY_DN14475_c0_g1_i1_1402	A/C	TRINITY_DN14475_c0_g1_i1	1402	NA	NA	+	TRINITY_DN14475_c0_g1_i1	NA	NA	NA	CC	CC	CA	CA	AA	AA
	UTRINITY_DN14475_c0_g1_i1_1405	A/T	TRINITY_DN14475_c0_g1_i1	1405	NA	NA	+	TRINITY_DN14475_c0_g1_i1	NA	NA	NA	AA	AA	AT	AT	TT	TT
	UTRINITY_DN187216_c0_g1_i1_461	C/T	TRINITY_DN187216_c0_g1_i1	461	NA	NA	+	TRINITY_DN187216_c0_g1_i1	NA	NA	NA	CC	CC	CC	CC	TT	TT
	UTRINITY_DN6792_c0_g1_i3_2576	C/T	TRINITY_DN6792_c0_g1_i3	2576	NA	NA	+	TRINITY_DN6792_c0_g1_i3	NA	NA	NA	CC	CC	CC	CC	TT	TT
	UTRINITY_DN6792_c0_g1_i3_2585	G/A	TRINITY_DN6792_c0_g1_i3	2585	NA	NA	+	TRINITY_DN6792_c0_g1_i3	NA	NA	NA	GG	GG	GG	GG	AA	AA
	UTRINITY_DN11870_c0_g2_i2_134	T/C	TRINITY_DN11870_c0_g2_i2	134	NA	NA	+	TRINITY_DN11870_c0_g2_i2	NA	NA	NA	TC	TC	TC	TC	TT	TT
	UTRINITY_DN11870_c0_g2_i2_244	A/G	TRINITY_DN11870_c0_g2_i2	244	NA	NA	+	TRINITY_DN11870_c0_g2_i2	NA	NA	NA	AG	AG	AG	AG	AA	AA
	UTRINITY_DN11870_c0_g2_i2_328	T/C	TRINITY_DN11870_c0_g2_i2	328	NA	NA	+	TRINITY_DN11870_c0_g2_i2	NA	NA	NA	CT	CT	CT	CT	TT	TT
	UTRINITY_DN11870_c0_g2_i2_336	G/A	TRINITY_DN11870_c0_g2_i2	336	NA	NA	+	TRINITY_DN11870_c0_g2_i2	NA	NA	NA	GG	GG	GG	GG	GA	GA
	UTRINITY_DN11870_c0_g2_i2_349	C/G	TRINITY_DN11870_c0_g2_i2	349	NA	NA	+	TRINITY_DN11870_c0_g2_i2	NA	NA	NA	CC	CC	CC	CC	CG	CG
	UTRINITY_DN11870_c0_g2_i2_374	A/C	TRINITY_DN11870_c0_g2_i2	374	NA	NA	+	TRINITY_DN11870_c0_g2_i2	NA	NA	NA	AA	AA	AA	AA	AC	AC
	UTRINITY_DN11870_c0_g2_i2_397	A/G	TRINITY_DN11870_c0_g2_i2	397	NA	NA	+	TRINITY_DN11870_c0_g2_i2	NA	NA	NA	AA	AA	AA	AA	AG	AG
	UTRINITY_DN11870_c0_g2_i2_1124	T/G	TRINITY_DN11870_c0_g2_i2	1124	NA	NA	+	TRINITY_DN11870_c0_g2_i2	NA	NA	NA	TT	TT	TT	TT	GG	GG
	UTRINITY_DN43636_c0_g1_i7_184	T/C	TRINITY_DN43636_c0_g1_i7	184	NA	NA	+	TRINITY_DN43636_c0_g1_i7	NA	NA	NA	TT	TT	TT	TT	CC	CC
	UTRINITY_DN43636_c0_g1_i7_187	C/G	TRINITY_DN43636_c0_g1_i7	187	NA	NA	+	TRINITY_DN43636_c0_g1_i7	NA	NA	NA	CC	CC	CC	CC	GG	GG
	UTRINITY_DN23082_c0_g1_i4_585	C/T	TRINITY_DN23082_c0_g1_i4	585	NA	NA	+	TRINITY_DN23082_c0_g1_i4	NA	NA	NA	CC	CC	CC	CC	TT	TT
	UTRINITY_DN23082_c0_g1_i4_596	T/C	TRINITY_DN23082_c0_g1_i4	596	NA	NA	+	TRINITY_DN23082_c0_g1_i4	NA	NA	NA	TT	TT	TT	TT	CC	CC
	UTRINITY_DN23082_c0_g1_i4_629	G/C	TRINITY_DN23082_c0_g1_i4	629	NA	NA	+	TRINITY_DN23082_c0_g1_i4	NA	NA	NA	GG	GG	GG	GG	CC	CC
	UTRINITY_DN23082_c0_g1_i4_640	A/T	TRINITY_DN23082_c0_g1_i4	640	NA	NA	+	TRINITY_DN23082_c0_g1_i4	NA	NA	NA	AA	AA	AA	AA	TT	TT
	UTRINITY_DN23082_c0_g1_i4_655	T/C	TRINITY_DN23082_c0_g1_i4	655	NA	NA	+	TRINITY_DN23082_c0_g1_i4	NA	NA	NA	TT	TT	TT	TT	CC	CC
	UTRINITY_DN15709_c0_g1_i1_192	A/G	TRINITY_DN15709_c0_g1_i1	192	NA	NA	+	TRINITY_DN15709_c0_g1_i1	NA	NA	NA	AA	AA	AA	AA	GG	GG
	UTRINITY_DN41301_c0_g1_i2_1716	T/C	TRINITY_DN41301_c0_g1_i2	1716	NA	NA	+	TRINITY_DN41301_c0_g1_i2	NA	NA	NA	--	--	TT	TT	TC	TC
	UTRINITY_DN41301_c0_g1_i2_1719	T/C	TRINITY_DN41301_c0_g1_i2	1719	NA	NA	+	TRINITY_DN41301_c0_g1_i2	NA	NA	NA	--	--	TT	TT	TC	TC
	UTRINITY_DN15218_c0_g1_i8_1805	C/T	TRINITY_DN15218_c0_g1_i8	1805	NA	NA	+	TRINITY_DN15218_c0_g1_i8	NA	NA	NA	CC	CC	CT	CT	CC	CC
	UTRINITY_DN42315_c0_g1_i4_593	T/C	TRINITY_DN42315_c0_g1_i4	593	NA	NA	+	TRINITY_DN42315_c0_g1_i4	NA	NA	NA	TT	TT	TT	TT	CC	CC
	UTRINITY_DN2668_c0_g1_i8_496	G/C	TRINITY_DN2668_c0_g1_i8	496	NA	NA	+	TRINITY_DN2668_c0_g1_i8	NA	NA	NA	GG	GG	GG	GG	GC	GC
	UTRINITY_DN2668_c0_g1_i8_532	T/C	TRINITY_DN2668_c0_g1_i8	532	NA	NA	+	TRINITY_DN2668_c0_g1_i8	NA	NA	NA	TT	TT	TT	TT	TC	TC
	UTRINITY_DN2668_c0_g1_i8_664	C/G	TRINITY_DN2668_c0_g1_i8	664	NA	NA	+	TRINITY_DN2668_c0_g1_i8	NA	NA	NA	CC	CC	CC	CC	GG	GG
	UTRINITY_DN7846_c0_g1_i5_1962	C/T	TRINITY_DN7846_c0_g1_i5	1962	NA	NA	+	TRINITY_DN7846_c0_g1_i5	NA	NA	NA	CC	CC	CC	CC	TT	TT
	UTRINITY_DN4227_c0_g1_i9_1137	T/C	TRINITY_DN4227_c0_g1_i9	1137	NA	NA	+	TRINITY_DN4227_c0_g1_i9	NA	NA	NA	TT	TT	TT	TT	CC	CC
	UTRINITY_DN15444_c0_g1_i2_232	T/C	TRINITY_DN15444_c0_g1_i2	232	NA	NA	+	TRINITY_DN15444_c0_g1_i2	NA	NA	NA	TT	TT	TT	TT	CC	CC
	UTRINITY_DN33_c0_g2_i2_1189	G/C	TRINITY_DN33_c0_g2_i2	1189	NA	NA	+	TRINITY_DN33_c0_g2_i2	NA	NA	NA	GG	GG	GC	GC	GC	GC
	UTRINITY_DN33_c0_g2_i2_1208	C/G	TRINITY_DN33_c0_g2_i2	1208	NA	NA	+	TRINITY_DN33_c0_g2_i2	NA	NA	NA	CC	CC	CG	CG	CG	CG
	UTRINITY_DN33_c0_g2_i2_1330	T/C	TRINITY_DN33_c0_g2_i2	1330	NA	NA	+	TRINITY_DN33_c0_g2_i2	NA	NA	NA	TT	TT	TC	TC	TC	TC
	UTRINITY_DN33_c0_g2_i2_1340	G/T	TRINITY_DN33_c0_g2_i2	1340	NA	NA	+	TRINITY_DN33_c0_g2_i2	NA	NA	NA	GG	GG	GG	GG	GT	GT
	UTRINITY_DN33_c0_g2_i2_2013	C/A	TRINITY_DN33_c0_g2_i2	2013	NA	NA	+	TRINITY_DN33_c0_g2_i2	NA	NA	NA	CC	CC	CC	CC	CA	CA
	UTRINITY_DN33_c0_g2_i2_2779	C/T	TRINITY_DN33_c0_g2_i2	2779	NA	NA	+	TRINITY_DN33_c0_g2_i2	NA	NA	NA	CC	CC	CT	CT	CT	CT
	UTRINITY_DN16135_c0_g1_i3_176	A/C	TRINITY_DN16135_c0_g1_i3	176	NA	NA	+	TRINITY_DN16135_c0_g1_i3	NA	NA	NA	AA	AA	CC	CC	AA	AA
	UTRINITY_DN16135_c0_g1_i3_177	A/T	TRINITY_DN16135_c0_g1_i3	177	NA	NA	+	TRINITY_DN16135_c0_g1_i3	NA	NA	NA	AA	AA	TT	TT	AA	AA
	UTRINITY_DN5628_c0_g1_i4_571	T/G	TRINITY_DN5628_c0_g1_i4	571	NA	NA	+	TRINITY_DN5628_c0_g1_i4	NA	NA	NA	TT	TT	TT	TT	GG	GG
	UTRINITY_DN5628_c0_g1_i4_573	G/T	TRINITY_DN5628_c0_g1_i4	573	NA	NA	+	TRINITY_DN5628_c0_g1_i4	NA	NA	NA	GG	GG	GG	GG	TT	TT
	UTRINITY_DN5628_c0_g1_i4_575	T/G	TRINITY_DN5628_c0_g1_i4	575	NA	NA	+	TRINITY_DN5628_c0_g1_i4	NA	NA	NA	TT	TT	TT	TT	GG	GG
	UTRINITY_DN15268_c0_g1_i5_192	G/C	TRINITY_DN15268_c0_g1_i5	192	NA	NA	+	TRINITY_DN15268_c0_g1_i5	NA	NA	NA	GG	GG	GG	GG	CC	CC
	UTRINITY_DN3789_c0_g1_i5_1771	C/T	TRINITY_DN3789_c0_g1_i5	1771	NA	NA	+	TRINITY_DN3789_c0_g1_i5	NA	NA	NA	CC	CC	CT	CT	CT	CT
	UTRINITY_DN3789_c0_g1_i5_1772	A/G	TRINITY_DN3789_c0_g1_i5	1772	NA	NA	+	TRINITY_DN3789_c0_g1_i5	NA	NA	NA	AA	AA	AG	AG	AG	AG
	UTRINITY_DN3789_c0_g1_i5_1847	A/G	TRINITY_DN3789_c0_g1_i5	1847	NA	NA	+	TRINITY_DN3789_c0_g1_i5	NA	NA	NA	AA	AA	AG	AG	AA	AA
	UTRINITY_DN2267_c0_g1_i3_884	G/A	TRINITY_DN2267_c0_g1_i3	884	NA	NA	+	TRINITY_DN2267_c0_g1_i3	NA	NA	NA	GG	GG	AA	AA	GG	GG
	UTRINITY_DN2267_c0_g1_i3_890	G/A	TRINITY_DN2267_c0_g1_i3	890	NA	NA	+	TRINITY_DN2267_c0_g1_i3	NA	NA	NA	GG	GG	AA	AA	GG	GG
	UTRINITY_DN7152_c0_g1_i2_1795	T/C	TRINITY_DN7152_c0_g1_i2	1795	NA	NA	+	TRINITY_DN7152_c0_g1_i2	NA	NA	NA	CC	CC	TT	TT	TT	TT
	UTRINITY_DN1216_c0_g1_i4_3200	G/C	TRINITY_DN1216_c0_g1_i4	3200	NA	NA	+	TRINITY_DN1216_c0_g1_i4	NA	NA	NA	GG	GG	GG	GG	GC	GC
	UTRINITY_DN6937_c0_g1_i3_1000	T/C	TRINITY_DN6937_c0_g1_i3	1000	NA	NA	+	TRINITY_DN6937_c0_g1_i3	NA	NA	NA	TT	TT	TT	TT	CC	CC
	UTRINITY_DN6937_c0_g1_i3_1259	T/A	TRINITY_DN6937_c0_g1_i3	1259	NA	NA	+	TRINITY_DN6937_c0_g1_i3	NA	NA	NA	TT	TT	TT	TT	AA	AA
	UTRINITY_DN7455_c0_g1_i16_315	T/G	TRINITY_DN7455_c0_g1_i16	315	NA	NA	+	TRINITY_DN7455_c0_g1_i16	NA	NA	NA	TT	TT	TT	TT	GG	GG
	UTRINITY_DN32708_c0_g2_i5_901	C/T	TRINITY_DN32708_c0_g2_i5	901	NA	NA	+	TRINITY_DN32708_c0_g2_i5	NA	NA	NA	CC	CC	CC	CC	CT	CT
	UTRINITY_DN11064_c0_g1_i10_963	C/T	TRINITY_DN11064_c0_g1_i10	963	NA	NA	+	TRINITY_DN11064_c0_g1_i10	NA	NA	NA	CC	CC	CC	CC	TT	TT
	UTRINITY_DN19930_c0_g2_i2_155	C/T	TRINITY_DN19930_c0_g2_i2	155	NA	NA	+	TRINITY_DN19930_c0_g2_i2	NA	NA	NA	CC	CC	CC	CC	CT	CT
	UTRINITY_DN346_c2_g1_i2_938	G/C	TRINITY_DN346_c2_g1_i2	938	NA	NA	+	TRINITY_DN346_c2_g1_i2	NA	NA	NA	GG	GG	GG	GG	GC	GC
	UTRINITY_DN346_c2_g1_i2_1097	C/T	TRINITY_DN346_c2_g1_i2	1097	NA	NA	+	TRINITY_DN346_c2_g1_i2	NA	NA	NA	CC	CC	CC	CC	CT	CT
	UTRINITY_DN61617_c0_g1_i8_291	A/G	TRINITY_DN61617_c0_g1_i8	291	NA	NA	+	TRINITY_DN61617_c0_g1_i8	NA	NA	NA	GG	GG	AA	AA	AA	AA
	UTRINITY_DN14691_c0_g1_i5_190	G/A	TRINITY_DN14691_c0_g1_i5	190	NA	NA	+	TRINITY_DN14691_c0_g1_i5	NA	NA	NA	GG	GG	GG	GG	AA	AA
	UTRINITY_DN14691_c0_g1_i5_846	C/T	TRINITY_DN14691_c0_g1_i5	846	NA	NA	+	TRINITY_DN14691_c0_g1_i5	NA	NA	NA	CC	CC	CC	CC	TT	TT
	UTRINITY_DN14691_c0_g1_i5_989	C/A	TRINITY_DN14691_c0_g1_i5	989	NA	NA	+	TRINITY_DN14691_c0_g1_i5	NA	NA	NA	CC	CC	CC	CC	AA	AA
	UTRINITY_DN14691_c0_g1_i5_1451	A/G	TRINITY_DN14691_c0_g1_i5	1451	NA	NA	+	TRINITY_DN14691_c0_g1_i5	NA	NA	NA	GG	GG	AA	AA	AA	AA
	UTRINITY_DN14691_c0_g1_i5_1475	A/T	TRINITY_DN14691_c0_g1_i5	1475	NA	NA	+	TRINITY_DN14691_c0_g1_i5	NA	NA	NA	TT	TT	AA	AA	AA	AA
	UTRINITY_DN6037_c1_g2_i6_196	A/G	TRINITY_DN6037_c1_g2_i6	196	NA	NA	+	TRINITY_DN6037_c1_g2_i6	NA	NA	NA	AA	AA	GG	GG	AA	AA
	UTRINITY_DN4480_c0_g1_i2_891	C/G	TRINITY_DN4480_c0_g1_i2	891	NA	NA	+	TRINITY_DN4480_c0_g1_i2	NA	NA	NA	CG	CG	CC	CC	CG	CG
	UTRINITY_DN4480_c0_g1_i2_897	C/G	TRINITY_DN4480_c0_g1_i2	897	NA	NA	+	TRINITY_DN4480_c0_g1_i2	NA	NA	NA	CG	CG	CC	CC	CG	CG
	UTRINITY_DN18445_c0_g1_i2_382	G/C	TRINITY_DN18445_c0_g1_i2	382	NA	NA	+	TRINITY_DN18445_c0_g1_i2	NA	NA	NA	GG	GG	GG	GG	CC	CC
	UTRINITY_DN100369_c0_g1_i1_148	G/T	TRINITY_DN100369_c0_g1_i1	148	NA	NA	+	TRINITY_DN100369_c0_g1_i1	NA	NA	NA	TG	TG	TG	TG	GG	GG
	UTRINITY_DN9826_c0_g1_i2_175	C/T	TRINITY_DN9826_c0_g1_i2	175	NA	NA	+	TRINITY_DN9826_c0_g1_i2	NA	NA	NA	CC	CC	CC	CC	CT	CT
	UTRINITY_DN8208_c0_g1_i2_2713	T/C	TRINITY_DN8208_c0_g1_i2	2713	NA	NA	+	TRINITY_DN8208_c0_g1_i2	NA	NA	NA	TT	TT	CT	CT	TT	TT
	UTRINITY_DN8208_c0_g1_i2_2773	T/C	TRINITY_DN8208_c0_g1_i2	2773	NA	NA	+	TRINITY_DN8208_c0_g1_i2	NA	NA	NA	TT	TT	TC	TC	TC	TC
	UTRINITY_DN8208_c0_g1_i2_2774	G/A	TRINITY_DN8208_c0_g1_i2	2774	NA	NA	+	TRINITY_DN8208_c0_g1_i2	NA	NA	NA	GG	GG	GA	GA	GG	GG
	UTRINITY_DN8208_c0_g1_i2_2800	T/C	TRINITY_DN8208_c0_g1_i2	2800	NA	NA	+	TRINITY_DN8208_c0_g1_i2	NA	NA	NA	TT	TT	TC	TC	TC	TC
	UTRINITY_DN869_c0_g2_i3_2630	A/T	TRINITY_DN869_c0_g2_i3	2630	NA	NA	+	TRINITY_DN869_c0_g2_i3	NA	NA	NA	AA	AA	AA	AA	TT	TT
	UTRINITY_DN2568_c0_g2_i1_2520	C/T	TRINITY_DN2568_c0_g2_i1	2520	NA	NA	+	TRINITY_DN2568_c0_g2_i1	NA	NA	NA	CT	CT	CT	CT	CC	CC
	UTRINITY_DN2568_c0_g2_i1_2532	G/C	TRINITY_DN2568_c0_g2_i1	2532	NA	NA	+	TRINITY_DN2568_c0_g2_i1	NA	NA	NA	GG	GG	GG	GG	GC	GC
	UTRINITY_DN2568_c0_g2_i1_2667	T/A	TRINITY_DN2568_c0_g2_i1	2667	NA	NA	+	TRINITY_DN2568_c0_g2_i1	NA	NA	NA	TA	TA	TA	TA	TT	TT
	UTRINITY_DN2568_c0_g2_i1_2739	T/C	TRINITY_DN2568_c0_g2_i1	2739	NA	NA	+	TRINITY_DN2568_c0_g2_i1	NA	NA	NA	TC	TC	TT	TT	TT	TT
	UTRINITY_DN2568_c0_g2_i1_2745	G/A	TRINITY_DN2568_c0_g2_i1	2745	NA	NA	+	TRINITY_DN2568_c0_g2_i1	NA	NA	NA	GA	GA	GG	GG	GA	GA
	UTRINITY_DN2149_c0_g1_i4_1828	G/A	TRINITY_DN2149_c0_g1_i4	1828	NA	NA	+	TRINITY_DN2149_c0_g1_i4	NA	NA	NA	GG	GG	GG	GG	AA	AA
	UTRINITY_DN132905_c0_g2_i2_53	C/T	TRINITY_DN132905_c0_g2_i2	53	NA	NA	+	TRINITY_DN132905_c0_g2_i2	NA	NA	NA	TC	TC	TC	TC	CC	CC
	UTRINITY_DN132905_c0_g2_i2_145	C/A	TRINITY_DN132905_c0_g2_i2	145	NA	NA	+	TRINITY_DN132905_c0_g2_i2	NA	NA	NA	AC	AC	AC	AC	CC	CC
	UTRINITY_DN132905_c0_g2_i2_172	C/T	TRINITY_DN132905_c0_g2_i2	172	NA	NA	+	TRINITY_DN132905_c0_g2_i2	NA	NA	NA	TC	TC	TC	TC	CC	CC
	UTRINITY_DN8019_c0_g1_i1_90	C/G	TRINITY_DN8019_c0_g1_i1	90	NA	NA	+	TRINITY_DN8019_c0_g1_i1	NA	NA	NA	CC	CC	CG	CG	CC	CC
	UTRINITY_DN6344_c0_g1_i8_1386	G/T	TRINITY_DN6344_c0_g1_i8	1386	NA	NA	+	TRINITY_DN6344_c0_g1_i8	NA	NA	NA	GG	GG	GT	GT	GT	GT
	UTRINITY_DN148_c0_g1_i2_2519	A/G	TRINITY_DN148_c0_g1_i2	2519	NA	NA	+	TRINITY_DN148_c0_g1_i2	NA	NA	NA	GG	GG	AA	AA	AA	AA
	UTRINITY_DN22077_c0_g3_i1_132	A/T	TRINITY_DN22077_c0_g3_i1	132	NA	NA	+	TRINITY_DN22077_c0_g3_i1	NA	NA	NA	AA	AA	AA	AA	AT	AT
	UTRINITY_DN730_c0_g1_i6_229	G/T	TRINITY_DN730_c0_g1_i6	229	NA	NA	+	TRINITY_DN730_c0_g1_i6	NA	NA	NA	GG	GG	GG	GG	TT	TT
	UTRINITY_DN730_c0_g1_i6_330	T/C	TRINITY_DN730_c0_g1_i6	330	NA	NA	+	TRINITY_DN730_c0_g1_i6	NA	NA	NA	TT	TT	TT	TT	CC	CC
	UTRINITY_DN730_c0_g1_i6_334	C/G	TRINITY_DN730_c0_g1_i6	334	NA	NA	+	TRINITY_DN730_c0_g1_i6	NA	NA	NA	CC	CC	CC	CC	GG	GG
	UTRINITY_DN4531_c3_g2_i1_149	C/T	TRINITY_DN4531_c3_g2_i1	149	NA	NA	+	TRINITY_DN4531_c3_g2_i1	NA	NA	NA	CC	CC	CC	CC	CT	CT
	UTRINITY_DN4531_c3_g2_i1_155	T/C	TRINITY_DN4531_c3_g2_i1	155	NA	NA	+	TRINITY_DN4531_c3_g2_i1	NA	NA	NA	TT	TT	TT	TT	TC	TC
	UTRINITY_DN1503_c0_g1_i3_304	C/G	TRINITY_DN1503_c0_g1_i3	304	NA	NA	+	TRINITY_DN1503_c0_g1_i3	NA	NA	NA	CC	CC	GG	GG	CC	CC
	UTRINITY_DN1418_c1_g1_i10_579	A/T	TRINITY_DN1418_c1_g1_i10	579	NA	NA	+	TRINITY_DN1418_c1_g1_i10	NA	NA	NA	TT	TT	AA	AA	AA	AA
	UTRINITY_DN1418_c1_g1_i10_847	C/T	TRINITY_DN1418_c1_g1_i10	847	NA	NA	+	TRINITY_DN1418_c1_g1_i10	NA	NA	NA	CC	CC	CC	CC	TT	TT
	UTRINITY_DN1418_c1_g1_i10_856	G/A	TRINITY_DN1418_c1_g1_i10	856	NA	NA	+	TRINITY_DN1418_c1_g1_i10	NA	NA	NA	GG	GG	GG	GG	AA	AA
	UTRINITY_DN1418_c1_g1_i10_899	C/A	TRINITY_DN1418_c1_g1_i10	899	NA	NA	+	TRINITY_DN1418_c1_g1_i10	NA	NA	NA	CC	CC	AA	AA	CC	CC
	UTRINITY_DN743_c0_g1_i7_111	T/C	TRINITY_DN743_c0_g1_i7	111	NA	NA	+	TRINITY_DN743_c0_g1_i7	NA	NA	NA	--	--	TT	TT	CC	CC
	UTRINITY_DN743_c0_g1_i7_123	A/G	TRINITY_DN743_c0_g1_i7	123	NA	NA	+	TRINITY_DN743_c0_g1_i7	NA	NA	NA	--	--	GG	GG	AA	AA
	UTRINITY_DN5560_c0_g1_i7_3100	G/A	TRINITY_DN5560_c0_g1_i7	3100	NA	NA	+	TRINITY_DN5560_c0_g1_i7	NA	NA	NA	GG	GG	GG	GG	AA	AA
	UTRINITY_DN5560_c0_g1_i7_3165	A/G	TRINITY_DN5560_c0_g1_i7	3165	NA	NA	+	TRINITY_DN5560_c0_g1_i7	NA	NA	NA	AA	AA	AA	AA	GG	GG
	UTRINITY_DN5560_c0_g1_i7_3241	G/A	TRINITY_DN5560_c0_g1_i7	3241	NA	NA	+	TRINITY_DN5560_c0_g1_i7	NA	NA	NA	GG	GG	GG	GG	AA	AA
	UTRINITY_DN15449_c0_g1_i3_732	T/C	TRINITY_DN15449_c0_g1_i3	732	NA	NA	+	TRINITY_DN15449_c0_g1_i3	NA	NA	NA	TT	TT	TC	TC	TT	TT
	UTRINITY_DN15449_c0_g1_i3_757	G/A	TRINITY_DN15449_c0_g1_i3	757	NA	NA	+	TRINITY_DN15449_c0_g1_i3	NA	NA	NA	GG	GG	GA	GA	GG	GG
	UTRINITY_DN1553_c0_g1_i2_1304	T/A	TRINITY_DN1553_c0_g1_i2	1304	NA	NA	+	TRINITY_DN1553_c0_g1_i2	NA	NA	NA	TT	TT	TT	TT	AA	AA
	UTRINITY_DN14699_c0_g1_i1_5043	G/A	TRINITY_DN14699_c0_g1_i1	5043	NA	NA	+	TRINITY_DN14699_c0_g1_i1	NA	NA	NA	GG	GG	GG	GG	AA	AA
	UTRINITY_DN14699_c0_g1_i1_5044	A/G	TRINITY_DN14699_c0_g1_i1	5044	NA	NA	+	TRINITY_DN14699_c0_g1_i1	NA	NA	NA	AA	AA	AA	AA	GG	GG
	UTRINITY_DN1644_c0_g1_i8_514	T/G	TRINITY_DN1644_c0_g1_i8	514	NA	NA	+	TRINITY_DN1644_c0_g1_i8	NA	NA	NA	TT	TT	TT	TT	TG	TG
	UTRINITY_DN1644_c0_g1_i8_532	A/G	TRINITY_DN1644_c0_g1_i8	532	NA	NA	+	TRINITY_DN1644_c0_g1_i8	NA	NA	NA	AA	AA	AA	AA	GG	GG
	UTRINITY_DN1644_c0_g1_i8_535	C/T	TRINITY_DN1644_c0_g1_i8	535	NA	NA	+	TRINITY_DN1644_c0_g1_i8	NA	NA	NA	CC	CC	CC	CC	TT	TT
	UTRINITY_DN1644_c0_g1_i8_580	T/C	TRINITY_DN1644_c0_g1_i8	580	NA	NA	+	TRINITY_DN1644_c0_g1_i8	NA	NA	NA	CT	CT	TT	TT	TT	TT
	UTRINITY_DN1644_c0_g1_i8_606	C/T	TRINITY_DN1644_c0_g1_i8	606	NA	NA	+	TRINITY_DN1644_c0_g1_i8	NA	NA	NA	CC	CC	CC	CC	CT	CT
	UTRINITY_DN1644_c0_g1_i8_712	C/T	TRINITY_DN1644_c0_g1_i8	712	NA	NA	+	TRINITY_DN1644_c0_g1_i8	NA	NA	NA	CC	CC	CT	CT	CC	CC
	UTRINITY_DN1644_c0_g1_i8_766	T/A	TRINITY_DN1644_c0_g1_i8	766	NA	NA	+	TRINITY_DN1644_c0_g1_i8	NA	NA	NA	TT	TT	TT	TT	TA	TA
	UTRINITY_DN8701_c0_g1_i4_1217	C/A	TRINITY_DN8701_c0_g1_i4	1217	NA	NA	+	TRINITY_DN8701_c0_g1_i4	NA	NA	NA	CC	CC	CC	CC	CA	CA
	UTRINITY_DN8701_c0_g1_i4_1345	A/G	TRINITY_DN8701_c0_g1_i4	1345	NA	NA	+	TRINITY_DN8701_c0_g1_i4	NA	NA	NA	AA	AA	AA	AA	AG	AG
	UTRINITY_DN8701_c0_g1_i4_1366	C/G	TRINITY_DN8701_c0_g1_i4	1366	NA	NA	+	TRINITY_DN8701_c0_g1_i4	NA	NA	NA	CC	CC	CC	CC	CG	CG
	UTRINITY_DN19010_c0_g2_i1_686	C/T	TRINITY_DN19010_c0_g2_i1	686	NA	NA	+	TRINITY_DN19010_c0_g2_i1	NA	NA	NA	CC	CC	CC	CC	TT	TT
	UTRINITY_DN14168_c0_g1_i3_403	A/G	TRINITY_DN14168_c0_g1_i3	403	NA	NA	+	TRINITY_DN14168_c0_g1_i3	NA	NA	NA	GG	GG	AA	AA	AA	AA
	UTRINITY_DN14168_c0_g1_i3_412	G/T	TRINITY_DN14168_c0_g1_i3	412	NA	NA	+	TRINITY_DN14168_c0_g1_i3	NA	NA	NA	TT	TT	GG	GG	GG	GG
	UTRINITY_DN4374_c0_g1_i6_2927	C/T	TRINITY_DN4374_c0_g1_i6	2927	NA	NA	+	TRINITY_DN4374_c0_g1_i6	NA	NA	NA	TT	TT	CC	CC	CC	CC
	UTRINITY_DN274_c0_g1_i4_1352	A/C	TRINITY_DN274_c0_g1_i4	1352	NA	NA	+	TRINITY_DN274_c0_g1_i4	NA	NA	NA	AA	AA	CC	CC	AA	AA
	UTRINITY_DN3138_c0_g3_i1_1133	C/A	TRINITY_DN3138_c0_g3_i1	1133	NA	NA	+	TRINITY_DN3138_c0_g3_i1	NA	NA	NA	CC	CC	CC	CC	CA	CA
	UTRINITY_DN5978_c0_g1_i7_825	T/A	TRINITY_DN5978_c0_g1_i7	825	NA	NA	+	TRINITY_DN5978_c0_g1_i7	NA	NA	NA	TT	TT	TT	TT	AA	AA
	UTRINITY_DN17590_c0_g1_i2_1144	G/A	TRINITY_DN17590_c0_g1_i2	1144	NA	NA	+	TRINITY_DN17590_c0_g1_i2	NA	NA	NA	GG	GG	GA	GA	GG	GG
	UTRINITY_DN17590_c0_g1_i2_1445	C/T	TRINITY_DN17590_c0_g1_i2	1445	NA	NA	+	TRINITY_DN17590_c0_g1_i2	NA	NA	NA	CC	CC	TC	TC	TC	TC
	UTRINITY_DN17590_c0_g1_i2_3329	G/A	TRINITY_DN17590_c0_g1_i2	3329	NA	NA	+	TRINITY_DN17590_c0_g1_i2	NA	NA	NA	GG	GG	GG	GG	GA	GA
	UTRINITY_DN17590_c0_g1_i2_3669	T/C	TRINITY_DN17590_c0_g1_i2	3669	NA	NA	+	TRINITY_DN17590_c0_g1_i2	NA	NA	NA	TT	TT	TC	TC	TC	TC
	UTRINITY_DN17590_c0_g1_i2_4101	G/A	TRINITY_DN17590_c0_g1_i2	4101	NA	NA	+	TRINITY_DN17590_c0_g1_i2	NA	NA	NA	GG	GG	GA	GA	GA	GA
	UTRINITY_DN1225_c0_g1_i25_307	G/T	TRINITY_DN1225_c0_g1_i25	307	NA	NA	+	TRINITY_DN1225_c0_g1_i25	NA	NA	NA	GG	GG	GG	GG	GT	GT
	UTRINITY_DN1225_c0_g1_i25_386	T/C	TRINITY_DN1225_c0_g1_i25	386	NA	NA	+	TRINITY_DN1225_c0_g1_i25	NA	NA	NA	TT	TT	TT	TT	TC	TC
	UTRINITY_DN1225_c0_g1_i25_410	T/C	TRINITY_DN1225_c0_g1_i25	410	NA	NA	+	TRINITY_DN1225_c0_g1_i25	NA	NA	NA	TT	TT	TT	TT	TC	TC
	UTRINITY_DN1225_c0_g1_i25_449	A/G	TRINITY_DN1225_c0_g1_i25	449	NA	NA	+	TRINITY_DN1225_c0_g1_i25	NA	NA	NA	AA	AA	AA	AA	AG	AG
	UTRINITY_DN1225_c0_g1_i25_461	C/T	TRINITY_DN1225_c0_g1_i25	461	NA	NA	+	TRINITY_DN1225_c0_g1_i25	NA	NA	NA	CC	CC	CC	CC	CT	CT
	UTRINITY_DN1225_c0_g1_i25_473	A/T	TRINITY_DN1225_c0_g1_i25	473	NA	NA	+	TRINITY_DN1225_c0_g1_i25	NA	NA	NA	AA	AA	AA	AA	AT	AT
	UTRINITY_DN1225_c0_g1_i25_474	G/T	TRINITY_DN1225_c0_g1_i25	474	NA	NA	+	TRINITY_DN1225_c0_g1_i25	NA	NA	NA	GG	GG	GG	GG	GT	GT
	UTRINITY_DN1225_c0_g1_i25_479	A/G	TRINITY_DN1225_c0_g1_i25	479	NA	NA	+	TRINITY_DN1225_c0_g1_i25	NA	NA	NA	AA	AA	AA	AA	AG	AG
	UTRINITY_DN192_c0_g1_i5_286	C/T	TRINITY_DN192_c0_g1_i5	286	NA	NA	+	TRINITY_DN192_c0_g1_i5	NA	NA	NA	TT	TT	CC	CC	CC	CC
	UTRINITY_DN3535_c3_g1_i2_1467	T/C	TRINITY_DN3535_c3_g1_i2	1467	NA	NA	+	TRINITY_DN3535_c3_g1_i2	NA	NA	NA	TC	TC	TC	TC	TT	TT
	UTRINITY_DN3535_c3_g1_i2_1473	T/G	TRINITY_DN3535_c3_g1_i2	1473	NA	NA	+	TRINITY_DN3535_c3_g1_i2	NA	NA	NA	TG	TG	TG	TG	TT	TT
	UTRINITY_DN6945_c0_g1_i8_45	T/C	TRINITY_DN6945_c0_g1_i8	45	NA	NA	+	TRINITY_DN6945_c0_g1_i8	NA	NA	NA	TT	TT	TT	TT	CC	CC
	UTRINITY_DN6701_c0_g1_i11_2218	G/A	TRINITY_DN6701_c0_g1_i11	2218	NA	NA	+	TRINITY_DN6701_c0_g1_i11	NA	NA	NA	GG	GG	GG	GG	AA	AA
	UTRINITY_DN11956_c0_g1_i1_1068	C/A	TRINITY_DN11956_c0_g1_i1	1068	NA	NA	+	TRINITY_DN11956_c0_g1_i1	NA	NA	NA	CC	CC	CC	CC	AA	AA
	UTRINITY_DN85998_c0_g4_i1_149	T/C	TRINITY_DN85998_c0_g4_i1	149	NA	NA	+	TRINITY_DN85998_c0_g4_i1	NA	NA	NA	TT	TT	TT	TT	CC	CC
	UTRINITY_DN85998_c0_g4_i1_218	T/C	TRINITY_DN85998_c0_g4_i1	218	NA	NA	+	TRINITY_DN85998_c0_g4_i1	NA	NA	NA	TT	TT	TT	TT	CC	CC
	UTRINITY_DN6779_c0_g1_i3_1247	A/G	TRINITY_DN6779_c0_g1_i3	1247	NA	NA	+	TRINITY_DN6779_c0_g1_i3	NA	NA	NA	AA	AA	AG	AG	AG	AG
	UTRINITY_DN31495_c0_g1_i1_97	G/A	TRINITY_DN31495_c0_g1_i1	97	NA	NA	+	TRINITY_DN31495_c0_g1_i1	NA	NA	NA	GG	GG	GG	GG	AA	AA
	UTRINITY_DN451_c0_g1_i6_2851	G/A	TRINITY_DN451_c0_g1_i6	2851	NA	NA	+	TRINITY_DN451_c0_g1_i6	NA	NA	NA	GG	GG	AA	AA	GG	GG
	UTRINITY_DN451_c0_g1_i6_2852	T/A	TRINITY_DN451_c0_g1_i6	2852	NA	NA	+	TRINITY_DN451_c0_g1_i6	NA	NA	NA	TT	TT	AA	AA	TT	TT
	UTRINITY_DN451_c0_g1_i6_2853	T/C	TRINITY_DN451_c0_g1_i6	2853	NA	NA	+	TRINITY_DN451_c0_g1_i6	NA	NA	NA	TT	TT	CC	CC	TT	TT
	UTRINITY_DN9567_c0_g1_i4_976	C/T	TRINITY_DN9567_c0_g1_i4	976	NA	NA	+	TRINITY_DN9567_c0_g1_i4	NA	NA	NA	CC	CC	CC	CC	CT	CT
	UTRINITY_DN19426_c0_g1_i1_103	T/G	TRINITY_DN19426_c0_g1_i1	103	NA	NA	+	TRINITY_DN19426_c0_g1_i1	NA	NA	NA	TT	TT	TG	TG	TG	TG
	UTRINITY_DN19426_c0_g1_i1_105	G/C	TRINITY_DN19426_c0_g1_i1	105	NA	NA	+	TRINITY_DN19426_c0_g1_i1	NA	NA	NA	GG	GG	GC	GC	GC	GC
	UTRINITY_DN19426_c0_g1_i1_115	C/G	TRINITY_DN19426_c0_g1_i1	115	NA	NA	+	TRINITY_DN19426_c0_g1_i1	NA	NA	NA	CC	CC	CG	CG	CG	CG
	UTRINITY_DN10402_c0_g3_i1_238	A/C	TRINITY_DN10402_c0_g3_i1	238	NA	NA	+	TRINITY_DN10402_c0_g3_i1	NA	NA	NA	AA	AA	AC	AC	AA	AA
	UTRINITY_DN10402_c0_g3_i1_248	C/T	TRINITY_DN10402_c0_g3_i1	248	NA	NA	+	TRINITY_DN10402_c0_g3_i1	NA	NA	NA	CC	CC	CT	CT	CC	CC
	UTRINITY_DN8648_c0_g1_i1_194	G/A	TRINITY_DN8648_c0_g1_i1	194	NA	NA	+	TRINITY_DN8648_c0_g1_i1	NA	NA	NA	GG	GG	AA	AA	GG	GG
	UTRINITY_DN69302_c0_g2_i1_134	T/C	TRINITY_DN69302_c0_g2_i1	134	NA	NA	+	TRINITY_DN69302_c0_g2_i1	NA	NA	NA	CC	CC	TT	TT	TT	TT
	UTRINITY_DN64632_c0_g2_i1_102	G/T	TRINITY_DN64632_c0_g2_i1	102	NA	NA	+	TRINITY_DN64632_c0_g2_i1	NA	NA	NA	GT	GT	GT	GT	GG	GG
	UTRINITY_DN3323_c0_g1_i5_1868	C/T	TRINITY_DN3323_c0_g1_i5	1868	NA	NA	+	TRINITY_DN3323_c0_g1_i5	NA	NA	NA	CC	CC	TC	TC	CC	CC
	UTRINITY_DN7458_c0_g1_i8_909	A/C	TRINITY_DN7458_c0_g1_i8	909	NA	NA	+	TRINITY_DN7458_c0_g1_i8	NA	NA	NA	AA	AA	AA	AA	CC	CC
	UTRINITY_DN6678_c0_g1_i5_852	A/G	TRINITY_DN6678_c0_g1_i5	852	NA	NA	+	TRINITY_DN6678_c0_g1_i5	NA	NA	NA	AA	AA	AA	AA	GG	GG
	UTRINITY_DN6678_c0_g1_i5_1246	T/C	TRINITY_DN6678_c0_g1_i5	1246	NA	NA	+	TRINITY_DN6678_c0_g1_i5	NA	NA	NA	TT	TT	TT	TT	CC	CC
	UTRINITY_DN6460_c0_g1_i3_1733	A/G	TRINITY_DN6460_c0_g1_i3	1733	NA	NA	+	TRINITY_DN6460_c0_g1_i3	NA	NA	NA	AA	AA	GG	GG	AA	AA
	UTRINITY_DN9157_c0_g1_i4_1071	C/T	TRINITY_DN9157_c0_g1_i4	1071	NA	NA	+	TRINITY_DN9157_c0_g1_i4	NA	NA	NA	CC	CC	CC	CC	CT	CT
	UTRINITY_DN9157_c0_g1_i4_1253	G/A	TRINITY_DN9157_c0_g1_i4	1253	NA	NA	+	TRINITY_DN9157_c0_g1_i4	NA	NA	NA	GA	GA	GA	GA	GG	GG
	UTRINITY_DN9784_c0_g1_i1_1240	A/G	TRINITY_DN9784_c0_g1_i1	1240	NA	NA	+	TRINITY_DN9784_c0_g1_i1	NA	NA	NA	AA	AA	AG	AG	GG	GG
	UTRINITY_DN4302_c0_g1_i19_1561	G/C	TRINITY_DN4302_c0_g1_i19	1561	NA	NA	+	TRINITY_DN4302_c0_g1_i19	NA	NA	NA	GG	GG	CC	CC	GG	GG
	UTRINITY_DN4302_c0_g1_i19_1562	G/A	TRINITY_DN4302_c0_g1_i19	1562	NA	NA	+	TRINITY_DN4302_c0_g1_i19	NA	NA	NA	GG	GG	AA	AA	GG	GG
	UTRINITY_DN6835_c0_g1_i10_523	C/T	TRINITY_DN6835_c0_g1_i10	523	NA	NA	+	TRINITY_DN6835_c0_g1_i10	NA	NA	NA	TT	TT	CC	CC	CC	CC
	UTRINITY_DN6835_c0_g1_i10_525	G/A	TRINITY_DN6835_c0_g1_i10	525	NA	NA	+	TRINITY_DN6835_c0_g1_i10	NA	NA	NA	AA	AA	GG	GG	GG	GG
	UTRINITY_DN6835_c0_g1_i10_526	G/A	TRINITY_DN6835_c0_g1_i10	526	NA	NA	+	TRINITY_DN6835_c0_g1_i10	NA	NA	NA	AA	AA	GG	GG	GG	GG
	UTRINITY_DN6835_c0_g1_i10_802	A/G	TRINITY_DN6835_c0_g1_i10	802	NA	NA	+	TRINITY_DN6835_c0_g1_i10	NA	NA	NA	AA	AA	AA	AA	GG	GG
	UTRINITY_DN6835_c0_g1_i10_857	C/T	TRINITY_DN6835_c0_g1_i10	857	NA	NA	+	TRINITY_DN6835_c0_g1_i10	NA	NA	NA	CC	CC	CC	CC	TT	TT
	UTRINITY_DN6835_c0_g1_i10_1082	C/T	TRINITY_DN6835_c0_g1_i10	1082	NA	NA	+	TRINITY_DN6835_c0_g1_i10	NA	NA	NA	CC	CC	CC	CC	TT	TT
	UTRINITY_DN1404_c0_g1_i1_157	G/A	TRINITY_DN1404_c0_g1_i1	157	NA	NA	+	TRINITY_DN1404_c0_g1_i1	NA	NA	NA	GG	GG	GG	GG	AA	AA
	UTRINITY_DN18523_c0_g1_i8_741	G/T	TRINITY_DN18523_c0_g1_i8	741	NA	NA	+	TRINITY_DN18523_c0_g1_i8	NA	NA	NA	GG	GG	GG	GG	TT	TT
	UTRINITY_DN16620_c1_g1_i2_512	C/G	TRINITY_DN16620_c1_g1_i2	512	NA	NA	+	TRINITY_DN16620_c1_g1_i2	NA	NA	NA	CC	CC	CG	CG	CG	CG
	UTRINITY_DN16620_c1_g1_i2_584	C/T	TRINITY_DN16620_c1_g1_i2	584	NA	NA	+	TRINITY_DN16620_c1_g1_i2	NA	NA	NA	CC	CC	CT	CT	CT	CT
	UTRINITY_DN16620_c1_g1_i2_605	C/T	TRINITY_DN16620_c1_g1_i2	605	NA	NA	+	TRINITY_DN16620_c1_g1_i2	NA	NA	NA	CC	CC	CT	CT	CT	CT
	UTRINITY_DN16620_c1_g1_i2_655	G/C	TRINITY_DN16620_c1_g1_i2	655	NA	NA	+	TRINITY_DN16620_c1_g1_i2	NA	NA	NA	GG	GG	GG	GG	GC	GC
	UTRINITY_DN16620_c1_g1_i2_1207	C/A	TRINITY_DN16620_c1_g1_i2	1207	NA	NA	+	TRINITY_DN16620_c1_g1_i2	NA	NA	NA	CC	CC	CC	CC	AA	AA
	UTRINITY_DN9523_c0_g2_i2_52	A/G	TRINITY_DN9523_c0_g2_i2	52	NA	NA	+	TRINITY_DN9523_c0_g2_i2	NA	NA	NA	AA	AA	AA	AA	GG	GG
	UTRINITY_DN4017_c0_g1_i8_1150	T/C	TRINITY_DN4017_c0_g1_i8	1150	NA	NA	+	TRINITY_DN4017_c0_g1_i8	NA	NA	NA	TT	TT	TC	TC	TC	TC
	UTRINITY_DN3476_c1_g2_i4_623	C/T	TRINITY_DN3476_c1_g2_i4	623	NA	NA	+	TRINITY_DN3476_c1_g2_i4	NA	NA	NA	TT	TT	CC	CC	CC	CC
	UTRINITY_DN3476_c1_g2_i4_627	C/T	TRINITY_DN3476_c1_g2_i4	627	NA	NA	+	TRINITY_DN3476_c1_g2_i4	NA	NA	NA	TT	TT	CC	CC	CC	CC
	UTRINITY_DN7291_c0_g1_i3_156	T/G	TRINITY_DN7291_c0_g1_i3	156	NA	NA	+	TRINITY_DN7291_c0_g1_i3	NA	NA	NA	TT	TT	TT	TT	GG	GG
	UTRINITY_DN6901_c0_g1_i12_34	G/A	TRINITY_DN6901_c0_g1_i12	34	NA	NA	+	TRINITY_DN6901_c0_g1_i12	NA	NA	NA	GG	GG	GG	GG	AA	AA
	UTRINITY_DN34091_c0_g1_i4_196	G/T	TRINITY_DN34091_c0_g1_i4	196	NA	NA	+	TRINITY_DN34091_c0_g1_i4	NA	NA	NA	GG	GG	GG	GG	TT	TT
	UTRINITY_DN29957_c0_g2_i2_102	A/T	TRINITY_DN29957_c0_g2_i2	102	NA	NA	+	TRINITY_DN29957_c0_g2_i2	NA	NA	NA	AA	AA	AA	AA	TT	TT
	UTRINITY_DN59628_c0_g3_i1_80	T/C	TRINITY_DN59628_c0_g3_i1	80	NA	NA	+	TRINITY_DN59628_c0_g3_i1	NA	NA	NA	TT	TT	CC	CC	TT	TT
	UTRINITY_DN12779_c1_g1_i1_113	G/A	TRINITY_DN12779_c1_g1_i1	113	NA	NA	+	TRINITY_DN12779_c1_g1_i1	NA	NA	NA	GG	GG	GG	GG	GA	GA
	UTRINITY_DN3302_c0_g1_i6_2322	G/A	TRINITY_DN3302_c0_g1_i6	2322	NA	NA	+	TRINITY_DN3302_c0_g1_i6	NA	NA	NA	GG	GG	GG	GG	AA	AA
	UTRINITY_DN3302_c0_g1_i6_3159	T/C	TRINITY_DN3302_c0_g1_i6	3159	NA	NA	+	TRINITY_DN3302_c0_g1_i6	NA	NA	NA	TT	TT	TT	TT	TC	TC
	UTRINITY_DN3302_c0_g1_i6_3165	C/T	TRINITY_DN3302_c0_g1_i6	3165	NA	NA	+	TRINITY_DN3302_c0_g1_i6	NA	NA	NA	CC	CC	CC	CC	CT	CT
	UTRINITY_DN7500_c1_g1_i4_1280	C/A	TRINITY_DN7500_c1_g1_i4	1280	NA	NA	+	TRINITY_DN7500_c1_g1_i4	NA	NA	NA	CC	CC	CC	CC	CA	CA
	UTRINITY_DN7500_c1_g1_i4_1303	C/T	TRINITY_DN7500_c1_g1_i4	1303	NA	NA	+	TRINITY_DN7500_c1_g1_i4	NA	NA	NA	CC	CC	CC	CC	CT	CT
	UTRINITY_DN4930_c0_g1_i4_2467	C/A	TRINITY_DN4930_c0_g1_i4	2467	NA	NA	+	TRINITY_DN4930_c0_g1_i4	NA	NA	NA	AA	AA	CC	CC	CC	CC
	UTRINITY_DN54123_c0_g1_i6_323	A/C	TRINITY_DN54123_c0_g1_i6	323	NA	NA	+	TRINITY_DN54123_c0_g1_i6	NA	NA	NA	AA	AA	AA	AA	CC	CC
	UTRINITY_DN937_c0_g1_i3_1716	C/T	TRINITY_DN937_c0_g1_i3	1716	NA	NA	+	TRINITY_DN937_c0_g1_i3	NA	NA	NA	CC	CC	CC	CC	TT	TT
	UTRINITY_DN1532_c0_g1_i4_3552	C/T	TRINITY_DN1532_c0_g1_i4	3552	NA	NA	+	TRINITY_DN1532_c0_g1_i4	NA	NA	NA	CC	CC	CC	CC	TT	TT
	UTRINITY_DN1532_c0_g1_i4_3561	C/G	TRINITY_DN1532_c0_g1_i4	3561	NA	NA	+	TRINITY_DN1532_c0_g1_i4	NA	NA	NA	CC	CC	CC	CC	GG	GG
	UTRINITY_DN316_c0_g2_i3_1436	T/C	TRINITY_DN316_c0_g2_i3	1436	NA	NA	+	TRINITY_DN316_c0_g2_i3	NA	NA	NA	TC	TC	TT	TT	TT	TT
	UTRINITY_DN316_c0_g2_i3_1451	A/G	TRINITY_DN316_c0_g2_i3	1451	NA	NA	+	TRINITY_DN316_c0_g2_i3	NA	NA	NA	AG	AG	AA	AA	AA	AA
	UTRINITY_DN316_c0_g2_i3_1719	T/A	TRINITY_DN316_c0_g2_i3	1719	NA	NA	+	TRINITY_DN316_c0_g2_i3	NA	NA	NA	TT	TT	TA	TA	TT	TT
	UTRINITY_DN316_c0_g2_i3_1721	T/C	TRINITY_DN316_c0_g2_i3	1721	NA	NA	+	TRINITY_DN316_c0_g2_i3	NA	NA	NA	TT	TT	TC	TC	TT	TT
	UTRINITY_DN3496_c1_g1_i4_1518	T/C	TRINITY_DN3496_c1_g1_i4	1518	NA	NA	+	TRINITY_DN3496_c1_g1_i4	NA	NA	NA	TT	TT	CC	CC	TT	TT
	UTRINITY_DN4169_c0_g1_i8_546	A/G	TRINITY_DN4169_c0_g1_i8	546	NA	NA	+	TRINITY_DN4169_c0_g1_i8	NA	NA	NA	AA	AA	AA	AA	GG	GG
	UTRINITY_DN24140_c0_g1_i1_388	A/T	TRINITY_DN24140_c0_g1_i1	388	NA	NA	+	TRINITY_DN24140_c0_g1_i1	NA	NA	NA	AT	AT	AT	AT	AA	AA
	UTRINITY_DN24140_c0_g1_i1_396	G/A	TRINITY_DN24140_c0_g1_i1	396	NA	NA	+	TRINITY_DN24140_c0_g1_i1	NA	NA	NA	GA	GA	GA	GA	GG	GG
	UTRINITY_DN24140_c0_g1_i1_397	A/G	TRINITY_DN24140_c0_g1_i1	397	NA	NA	+	TRINITY_DN24140_c0_g1_i1	NA	NA	NA	AG	AG	AG	AG	AA	AA
	UTRINITY_DN6552_c0_g1_i1_649	C/T	TRINITY_DN6552_c0_g1_i1	649	NA	NA	+	TRINITY_DN6552_c0_g1_i1	NA	NA	NA	CT	CT	CC	CC	CC	CC
	UTRINITY_DN6552_c0_g1_i1_680	C/T	TRINITY_DN6552_c0_g1_i1	680	NA	NA	+	TRINITY_DN6552_c0_g1_i1	NA	NA	NA	CT	CT	CC	CC	CC	CC
	UTRINITY_DN24920_c0_g1_i3_468	A/G	TRINITY_DN24920_c0_g1_i3	468	NA	NA	+	TRINITY_DN24920_c0_g1_i3	NA	NA	NA	AA	AA	AA	AA	GG	GG
	UTRINITY_DN437_c0_g1_i2_1173	G/C	TRINITY_DN437_c0_g1_i2	1173	NA	NA	+	TRINITY_DN437_c0_g1_i2	NA	NA	NA	CC	CC	GG	GG	GG	GG
	UTRINITY_DN12186_c0_g1_i1_1362	G/A	TRINITY_DN12186_c0_g1_i1	1362	NA	NA	+	TRINITY_DN12186_c0_g1_i1	NA	NA	NA	AA	AA	GG	GG	GG	GG
	UTRINITY_DN12186_c0_g1_i1_1370	T/C	TRINITY_DN12186_c0_g1_i1	1370	NA	NA	+	TRINITY_DN12186_c0_g1_i1	NA	NA	NA	CC	CC	TT	TT	TT	TT
	UTRINITY_DN12186_c0_g1_i1_1406	A/T	TRINITY_DN12186_c0_g1_i1	1406	NA	NA	+	TRINITY_DN12186_c0_g1_i1	NA	NA	NA	TT	TT	AA	AA	AA	AA
	UTRINITY_DN12186_c0_g1_i1_1409	A/T	TRINITY_DN12186_c0_g1_i1	1409	NA	NA	+	TRINITY_DN12186_c0_g1_i1	NA	NA	NA	TT	TT	AA	AA	AA	AA
	UTRINITY_DN12186_c0_g1_i1_1415	T/C	TRINITY_DN12186_c0_g1_i1	1415	NA	NA	+	TRINITY_DN12186_c0_g1_i1	NA	NA	NA	CC	CC	TT	TT	TT	TT
	UTRINITY_DN1693_c0_g1_i10_606	C/G	TRINITY_DN1693_c0_g1_i10	606	NA	NA	+	TRINITY_DN1693_c0_g1_i10	NA	NA	NA	CC	CC	CG	CG	CG	CG
	UTRINITY_DN1693_c0_g1_i10_635	A/G	TRINITY_DN1693_c0_g1_i10	635	NA	NA	+	TRINITY_DN1693_c0_g1_i10	NA	NA	NA	AA	AA	AG	AG	AG	AG
	UTRINITY_DN1693_c0_g1_i10_795	G/C	TRINITY_DN1693_c0_g1_i10	795	NA	NA	+	TRINITY_DN1693_c0_g1_i10	NA	NA	NA	GG	GG	GG	GG	GC	GC
	UTRINITY_DN4797_c0_g1_i7_696	A/G	TRINITY_DN4797_c0_g1_i7	696	NA	NA	+	TRINITY_DN4797_c0_g1_i7	NA	NA	NA	AA	AA	AA	AA	AG	AG
	UTRINITY_DN4797_c0_g1_i7_2016	G/A	TRINITY_DN4797_c0_g1_i7	2016	NA	NA	+	TRINITY_DN4797_c0_g1_i7	NA	NA	NA	GG	GG	GG	GG	AA	AA
	UTRINITY_DN4797_c0_g1_i7_2099	A/C	TRINITY_DN4797_c0_g1_i7	2099	NA	NA	+	TRINITY_DN4797_c0_g1_i7	NA	NA	NA	CC	CC	AA	AA	AA	AA
	UTRINITY_DN1777_c0_g1_i5_1345	G/C	TRINITY_DN1777_c0_g1_i5	1345	NA	NA	+	TRINITY_DN1777_c0_g1_i5	NA	NA	NA	GG	GG	CC	CC	GG	GG
	UTRINITY_DN1777_c0_g1_i5_1353	C/G	TRINITY_DN1777_c0_g1_i5	1353	NA	NA	+	TRINITY_DN1777_c0_g1_i5	NA	NA	NA	CC	CC	GG	GG	CC	CC
	UTRINITY_DN1777_c0_g1_i5_1377	C/A	TRINITY_DN1777_c0_g1_i5	1377	NA	NA	+	TRINITY_DN1777_c0_g1_i5	NA	NA	NA	CC	CC	CC	CC	AA	AA
	UTRINITY_DN255_c0_g1_i4_1330	G/A	TRINITY_DN255_c0_g1_i4	1330	NA	NA	+	TRINITY_DN255_c0_g1_i4	NA	NA	NA	AA	AA	GG	GG	GG	GG
	UTRINITY_DN255_c0_g1_i4_1431	C/A	TRINITY_DN255_c0_g1_i4	1431	NA	NA	+	TRINITY_DN255_c0_g1_i4	NA	NA	NA	CC	CC	CC	CC	AA	AA
	UTRINITY_DN255_c0_g1_i4_1930	C/T	TRINITY_DN255_c0_g1_i4	1930	NA	NA	+	TRINITY_DN255_c0_g1_i4	NA	NA	NA	CC	CC	CC	CC	TT	TT
	UTRINITY_DN1671_c0_g1_i3_1293	C/T	TRINITY_DN1671_c0_g1_i3	1293	NA	NA	+	TRINITY_DN1671_c0_g1_i3	NA	NA	NA	CC	CC	CC	CC	TT	TT
	UTRINITY_DN1671_c0_g1_i3_1320	C/T	TRINITY_DN1671_c0_g1_i3	1320	NA	NA	+	TRINITY_DN1671_c0_g1_i3	NA	NA	NA	CC	CC	CC	CC	CT	CT
	UTRINITY_DN1671_c0_g1_i3_1332	C/A	TRINITY_DN1671_c0_g1_i3	1332	NA	NA	+	TRINITY_DN1671_c0_g1_i3	NA	NA	NA	CC	CC	CC	CC	AA	AA
	UTRINITY_DN1671_c0_g1_i3_1350	T/C	TRINITY_DN1671_c0_g1_i3	1350	NA	NA	+	TRINITY_DN1671_c0_g1_i3	NA	NA	NA	TT	TT	TT	TT	TC	TC
	UTRINITY_DN1671_c0_g1_i3_1394	T/A	TRINITY_DN1671_c0_g1_i3	1394	NA	NA	+	TRINITY_DN1671_c0_g1_i3	NA	NA	NA	TT	TT	TT	TT	TA	TA
	UTRINITY_DN1671_c0_g1_i3_1434	C/G	TRINITY_DN1671_c0_g1_i3	1434	NA	NA	+	TRINITY_DN1671_c0_g1_i3	NA	NA	NA	CC	CC	CC	CC	GG	GG
	UTRINITY_DN1671_c0_g1_i3_1477	A/G	TRINITY_DN1671_c0_g1_i3	1477	NA	NA	+	TRINITY_DN1671_c0_g1_i3	NA	NA	NA	AA	AA	AA	AA	GA	GA
	UTRINITY_DN1671_c0_g1_i3_1508	C/R	TRINITY_DN1671_c0_g1_i3	1508	NA	NA	+	TRINITY_DN1671_c0_g1_i3	NA	NA	NA	CC	CC	CC	CC	GA	GA
	UTRINITY_DN1671_c0_g1_i3_1548	G/C	TRINITY_DN1671_c0_g1_i3	1548	NA	NA	+	TRINITY_DN1671_c0_g1_i3	NA	NA	NA	GG	GG	GG	GG	GC	GC
	UTRINITY_DN1671_c0_g1_i3_1566	T/A	TRINITY_DN1671_c0_g1_i3	1566	NA	NA	+	TRINITY_DN1671_c0_g1_i3	NA	NA	NA	TT	TT	TT	TT	TA	TA
	UTRINITY_DN1671_c0_g1_i3_1636	C/T	TRINITY_DN1671_c0_g1_i3	1636	NA	NA	+	TRINITY_DN1671_c0_g1_i3	NA	NA	NA	CC	CC	CC	CC	CT	CT
	UTRINITY_DN81130_c0_g1_i1_130	A/C	TRINITY_DN81130_c0_g1_i1	130	NA	NA	+	TRINITY_DN81130_c0_g1_i1	NA	NA	NA	AC	AC	AA	AA	AA	AA
	UTRINITY_DN39922_c0_g1_i1_552	G/A	TRINITY_DN39922_c0_g1_i1	552	NA	NA	+	TRINITY_DN39922_c0_g1_i1	NA	NA	NA	GG	GG	AA	AA	GG	GG
	UTRINITY_DN10237_c0_g1_i1_388	T/C	TRINITY_DN10237_c0_g1_i1	388	NA	NA	+	TRINITY_DN10237_c0_g1_i1	NA	NA	NA	TT	TT	TT	TT	CC	CC
	UTRINITY_DN29710_c0_g5_i1_916	C/G	TRINITY_DN29710_c0_g5_i1	916	NA	NA	+	TRINITY_DN29710_c0_g5_i1	NA	NA	NA	CC	CC	CC	CC	GG	GG
	UTRINITY_DN3177_c1_g1_i6_2044	T/A	TRINITY_DN3177_c1_g1_i6	2044	NA	NA	+	TRINITY_DN3177_c1_g1_i6	NA	NA	NA	AA	AA	TT	TT	TT	TT
	UTRINITY_DN10204_c0_g1_i3_353	G/A	TRINITY_DN10204_c0_g1_i3	353	NA	NA	+	TRINITY_DN10204_c0_g1_i3	NA	NA	NA	GG	GG	GG	GG	AA	AA
	UTRINITY_DN10745_c0_g1_i4_272	C/A	TRINITY_DN10745_c0_g1_i4	272	NA	NA	+	TRINITY_DN10745_c0_g1_i4	NA	NA	NA	CA	CA	CA	CA	CC	CC
	UTRINITY_DN6942_c0_g1_i1_1187	C/T	TRINITY_DN6942_c0_g1_i1	1187	NA	NA	+	TRINITY_DN6942_c0_g1_i1	NA	NA	NA	CC	CC	TT	TT	CC	CC
	UTRINITY_DN6942_c0_g1_i1_2348	T/C	TRINITY_DN6942_c0_g1_i1	2348	NA	NA	+	TRINITY_DN6942_c0_g1_i1	NA	NA	NA	TT	TT	TT	TT	CC	CC
	UTRINITY_DN1570_c0_g1_i10_935	T/C	TRINITY_DN1570_c0_g1_i10	935	NA	NA	+	TRINITY_DN1570_c0_g1_i10	NA	NA	NA	CC	CC	TT	TT	TT	TT
	UTRINITY_DN1640_c0_g1_i5_223	C/T	TRINITY_DN1640_c0_g1_i5	223	NA	NA	+	TRINITY_DN1640_c0_g1_i5	NA	NA	NA	CC	CC	TT	TT	CC	CC
	UTRINITY_DN1640_c0_g1_i5_240	C/T	TRINITY_DN1640_c0_g1_i5	240	NA	NA	+	TRINITY_DN1640_c0_g1_i5	NA	NA	NA	CC	CC	TT	TT	CC	CC
	UTRINITY_DN4419_c0_g1_i9_1258	T/C	TRINITY_DN4419_c0_g1_i9	1258	NA	NA	+	TRINITY_DN4419_c0_g1_i9	NA	NA	NA	TT	TT	TT	TT	CC	CC
	UTRINITY_DN6267_c0_g1_i6_152	A/G	TRINITY_DN6267_c0_g1_i6	152	NA	NA	+	TRINITY_DN6267_c0_g1_i6	NA	NA	NA	GG	GG	AA	AA	AA	AA
	UTRINITY_DN6267_c0_g1_i6_154	A/G	TRINITY_DN6267_c0_g1_i6	154	NA	NA	+	TRINITY_DN6267_c0_g1_i6	NA	NA	NA	GG	GG	AA	AA	AA	AA
	UTRINITY_DN6267_c0_g1_i6_163	A/T	TRINITY_DN6267_c0_g1_i6	163	NA	NA	+	TRINITY_DN6267_c0_g1_i6	NA	NA	NA	TT	TT	AA	AA	AA	AA
	UTRINITY_DN6267_c0_g1_i6_166	G/C	TRINITY_DN6267_c0_g1_i6	166	NA	NA	+	TRINITY_DN6267_c0_g1_i6	NA	NA	NA	CC	CC	GG	GG	GG	GG
	UTRINITY_DN6267_c0_g1_i6_176	C/G	TRINITY_DN6267_c0_g1_i6	176	NA	NA	+	TRINITY_DN6267_c0_g1_i6	NA	NA	NA	GG	GG	CC	CC	CC	CC
	UTRINITY_DN38528_c1_g1_i1_322	A/G	TRINITY_DN38528_c1_g1_i1	322	NA	NA	+	TRINITY_DN38528_c1_g1_i1	NA	NA	NA	GG	GG	AA	AA	AA	AA
	UTRINITY_DN8763_c1_g1_i8_323	G/A	TRINITY_DN8763_c1_g1_i8	323	NA	NA	+	TRINITY_DN8763_c1_g1_i8	NA	NA	NA	GG	GG	GG	GG	AA	AA
	UTRINITY_DN8763_c1_g1_i8_367	C/T	TRINITY_DN8763_c1_g1_i8	367	NA	NA	+	TRINITY_DN8763_c1_g1_i8	NA	NA	NA	CC	CC	CC	CC	TT	TT
	UTRINITY_DN8763_c1_g1_i8_483	T/C	TRINITY_DN8763_c1_g1_i8	483	NA	NA	+	TRINITY_DN8763_c1_g1_i8	NA	NA	NA	TT	TT	TT	TT	CC	CC
	UTRINITY_DN8763_c1_g1_i8_494	G/A	TRINITY_DN8763_c1_g1_i8	494	NA	NA	+	TRINITY_DN8763_c1_g1_i8	NA	NA	NA	GG	GG	GG	GG	AA	AA
	UTRINITY_DN14432_c0_g1_i1_262	C/T	TRINITY_DN14432_c0_g1_i1	262	NA	NA	+	TRINITY_DN14432_c0_g1_i1	NA	NA	NA	CC	CC	CC	CC	TT	TT
	UTRINITY_DN24244_c0_g1_i1_116	C/T	TRINITY_DN24244_c0_g1_i1	116	NA	NA	+	TRINITY_DN24244_c0_g1_i1	NA	NA	NA	CC	CC	CT	CT	CT	CT
	UTRINITY_DN69527_c0_g3_i3_193	G/A	TRINITY_DN69527_c0_g3_i3	193	NA	NA	+	TRINITY_DN69527_c0_g3_i3	NA	NA	NA	GG	GG	GG	GG	GA	GA
	UTRINITY_DN5383_c0_g2_i1_606	A/C	TRINITY_DN5383_c0_g2_i1	606	NA	NA	+	TRINITY_DN5383_c0_g2_i1	NA	NA	NA	AA	AA	AA	AA	CC	CC
	UTRINITY_DN1242_c0_g2_i2_2403	C/T	TRINITY_DN1242_c0_g2_i2	2403	NA	NA	+	TRINITY_DN1242_c0_g2_i2	NA	NA	NA	CC	CC	CC	CC	TT	TT
	UTRINITY_DN15076_c0_g1_i3_236	C/T	TRINITY_DN15076_c0_g1_i3	236	NA	NA	+	TRINITY_DN15076_c0_g1_i3	NA	NA	NA	CC	CC	CC	CC	TT	TT
	UTRINITY_DN15076_c0_g1_i3_239	T/C	TRINITY_DN15076_c0_g1_i3	239	NA	NA	+	TRINITY_DN15076_c0_g1_i3	NA	NA	NA	TT	TT	TT	TT	CC	CC
	UTRINITY_DN461_c0_g2_i1_268	T/G	TRINITY_DN461_c0_g2_i1	268	NA	NA	+	TRINITY_DN461_c0_g2_i1	NA	NA	NA	TG	TG	TT	TT	TT	TT
	UTRINITY_DN17498_c0_g1_i2_142	A/G	TRINITY_DN17498_c0_g1_i2	142	NA	NA	+	TRINITY_DN17498_c0_g1_i2	NA	NA	NA	AA	AA	AG	AG	AG	AG
	UTRINITY_DN3174_c0_g2_i2_140	T/C	TRINITY_DN3174_c0_g2_i2	140	NA	NA	+	TRINITY_DN3174_c0_g2_i2	NA	NA	NA	TT	TT	TT	TT	CC	CC
	UTRINITY_DN11725_c0_g1_i4_1550	A/G	TRINITY_DN11725_c0_g1_i4	1550	NA	NA	+	TRINITY_DN11725_c0_g1_i4	NA	NA	NA	AA	AA	AA	AA	AG	AG
	UTRINITY_DN11725_c0_g1_i4_1598	G/A	TRINITY_DN11725_c0_g1_i4	1598	NA	NA	+	TRINITY_DN11725_c0_g1_i4	NA	NA	NA	GG	GG	GG	GG	GA	GA
	UTRINITY_DN11725_c0_g1_i4_1604	T/C	TRINITY_DN11725_c0_g1_i4	1604	NA	NA	+	TRINITY_DN11725_c0_g1_i4	NA	NA	NA	TT	TT	TT	TT	TC	TC
	UTRINITY_DN12788_c0_g1_i1_96	G/A	TRINITY_DN12788_c0_g1_i1	96	NA	NA	+	TRINITY_DN12788_c0_g1_i1	NA	NA	NA	GA	GA	GA	GA	GG	GG
	UTRINITY_DN35359_c0_g1_i2_431	T/C	TRINITY_DN35359_c0_g1_i2	431	NA	NA	+	TRINITY_DN35359_c0_g1_i2	NA	NA	NA	TT	TT	TT	TT	CC	CC
	UTRINITY_DN11215_c0_g1_i1_985	T/C	TRINITY_DN11215_c0_g1_i1	985	NA	NA	+	TRINITY_DN11215_c0_g1_i1	NA	NA	NA	CC	CC	TT	TT	TT	TT
	UTRINITY_DN6025_c0_g1_i1_372	G/C	TRINITY_DN6025_c0_g1_i1	372	NA	NA	+	TRINITY_DN6025_c0_g1_i1	NA	NA	NA	GG	GG	GG	GG	CC	CC
	UTRINITY_DN6025_c0_g1_i1_450	G/C	TRINITY_DN6025_c0_g1_i1	450	NA	NA	+	TRINITY_DN6025_c0_g1_i1	NA	NA	NA	GG	GG	GG	GG	CC	CC
	UTRINITY_DN1283_c0_g1_i1_528	T/C	TRINITY_DN1283_c0_g1_i1	528	NA	NA	+	TRINITY_DN1283_c0_g1_i1	NA	NA	NA	TT	TT	CC	CC	TT	TT
	UTRINITY_DN12284_c0_g1_i1_145	C/T	TRINITY_DN12284_c0_g1_i1	145	NA	NA	+	TRINITY_DN12284_c0_g1_i1	NA	NA	NA	CC	CC	CC	CC	TT	TT
	UTRINITY_DN12284_c0_g1_i1_513	G/A	TRINITY_DN12284_c0_g1_i1	513	NA	NA	+	TRINITY_DN12284_c0_g1_i1	NA	NA	NA	GG	GG	GG	GG	AA	AA
	UTRINITY_DN11415_c1_g3_i1_1109	G/A	TRINITY_DN11415_c1_g3_i1	1109	NA	NA	+	TRINITY_DN11415_c1_g3_i1	NA	NA	NA	GG	GG	GA	GA	GG	GG
	UTRINITY_DN11415_c1_g3_i1_1385	C/T	TRINITY_DN11415_c1_g3_i1	1385	NA	NA	+	TRINITY_DN11415_c1_g3_i1	NA	NA	NA	CC	CC	CT	CT	CT	CT
	UTRINITY_DN11415_c1_g3_i1_1396	T/C	TRINITY_DN11415_c1_g3_i1	1396	NA	NA	+	TRINITY_DN11415_c1_g3_i1	NA	NA	NA	TT	TT	TC	TC	TC	TC
	UTRINITY_DN33547_c0_g2_i1_86	G/T	TRINITY_DN33547_c0_g2_i1	86	NA	NA	+	TRINITY_DN33547_c0_g2_i1	NA	NA	NA	GG	GG	GG	GG	GT	GT
	UTRINITY_DN33547_c0_g2_i1_123	G/A	TRINITY_DN33547_c0_g2_i1	123	NA	NA	+	TRINITY_DN33547_c0_g2_i1	NA	NA	NA	GG	GG	GG	GG	GA	GA
	UTRINITY_DN33547_c0_g2_i1_131	C/T	TRINITY_DN33547_c0_g2_i1	131	NA	NA	+	TRINITY_DN33547_c0_g2_i1	NA	NA	NA	CC	CC	CC	CC	CT	CT
	UTRINITY_DN202_c1_g1_i13_1658	C/T	TRINITY_DN202_c1_g1_i13	1658	NA	NA	+	TRINITY_DN202_c1_g1_i13	NA	NA	NA	CC	CC	CC	CC	TT	TT
	UTRINITY_DN3777_c2_g1_i21_144	C/T	TRINITY_DN3777_c2_g1_i21	144	NA	NA	+	TRINITY_DN3777_c2_g1_i21	NA	NA	NA	CC	CC	CC	CC	TC	TC
	UTRINITY_DN3777_c2_g1_i21_159	C/T	TRINITY_DN3777_c2_g1_i21	159	NA	NA	+	TRINITY_DN3777_c2_g1_i21	NA	NA	NA	CC	CC	TC	TC	TC	TC
	UTRINITY_DN5664_c0_g1_i2_440	C/G	TRINITY_DN5664_c0_g1_i2	440	NA	NA	+	TRINITY_DN5664_c0_g1_i2	NA	NA	NA	GG	GG	CC	CC	CC	CC
	UTRINITY_DN5664_c0_g1_i2_448	G/C	TRINITY_DN5664_c0_g1_i2	448	NA	NA	+	TRINITY_DN5664_c0_g1_i2	NA	NA	NA	GG	GG	GG	GG	CC	CC
	UTRINITY_DN5664_c0_g1_i2_481	T/G	TRINITY_DN5664_c0_g1_i2	481	NA	NA	+	TRINITY_DN5664_c0_g1_i2	NA	NA	NA	TT	TT	TT	TT	GG	GG
	UTRINITY_DN5664_c0_g1_i2_496	A/G	TRINITY_DN5664_c0_g1_i2	496	NA	NA	+	TRINITY_DN5664_c0_g1_i2	NA	NA	NA	AA	AA	AA	AA	GG	GG
	UTRINITY_DN5664_c0_g1_i2_498	G/A	TRINITY_DN5664_c0_g1_i2	498	NA	NA	+	TRINITY_DN5664_c0_g1_i2	NA	NA	NA	GG	GG	GG	GG	AA	AA
	UTRINITY_DN5664_c0_g1_i2_511	A/G	TRINITY_DN5664_c0_g1_i2	511	NA	NA	+	TRINITY_DN5664_c0_g1_i2	NA	NA	NA	AA	AA	AA	AA	GG	GG
	UTRINITY_DN5664_c0_g1_i2_525	G/A	TRINITY_DN5664_c0_g1_i2	525	NA	NA	+	TRINITY_DN5664_c0_g1_i2	NA	NA	NA	GG	GG	GG	GG	AA	AA
	UTRINITY_DN4243_c1_g1_i17_2314	C/A	TRINITY_DN4243_c1_g1_i17	2314	NA	NA	+	TRINITY_DN4243_c1_g1_i17	NA	NA	NA	CC	CC	CC	CC	AA	AA
	UTRINITY_DN4243_c1_g1_i17_2325	C/A	TRINITY_DN4243_c1_g1_i17	2325	NA	NA	+	TRINITY_DN4243_c1_g1_i17	NA	NA	NA	CC	CC	CC	CC	AA	AA
	UTRINITY_DN4243_c1_g1_i17_2330	T/C	TRINITY_DN4243_c1_g1_i17	2330	NA	NA	+	TRINITY_DN4243_c1_g1_i17	NA	NA	NA	TT	TT	TT	TT	CC	CC
	UTRINITY_DN4243_c1_g1_i17_2391	C/G	TRINITY_DN4243_c1_g1_i17	2391	NA	NA	+	TRINITY_DN4243_c1_g1_i17	NA	NA	NA	CC	CC	GG	GG	CC	CC
	UTRINITY_DN4243_c1_g1_i17_2541	G/A	TRINITY_DN4243_c1_g1_i17	2541	NA	NA	+	TRINITY_DN4243_c1_g1_i17	NA	NA	NA	GG	GG	GG	GG	AA	AA
	UTRINITY_DN11864_c0_g1_i3_362	T/A	TRINITY_DN11864_c0_g1_i3	362	NA	NA	+	TRINITY_DN11864_c0_g1_i3	NA	NA	NA	TA	TA	TA	TA	TT	TT
	UTRINITY_DN11864_c0_g1_i3_373	C/T	TRINITY_DN11864_c0_g1_i3	373	NA	NA	+	TRINITY_DN11864_c0_g1_i3	NA	NA	NA	CT	CT	CT	CT	CC	CC
	UTRINITY_DN11864_c0_g1_i3_432	T/C	TRINITY_DN11864_c0_g1_i3	432	NA	NA	+	TRINITY_DN11864_c0_g1_i3	NA	NA	NA	TT	TT	TC	TC	TT	TT
	UTRINITY_DN11864_c0_g1_i3_435	A/G	TRINITY_DN11864_c0_g1_i3	435	NA	NA	+	TRINITY_DN11864_c0_g1_i3	NA	NA	NA	AA	AA	AG	AG	AA	AA
	UTRINITY_DN4803_c0_g1_i2_2365	T/C	TRINITY_DN4803_c0_g1_i2	2365	NA	NA	+	TRINITY_DN4803_c0_g1_i2	NA	NA	NA	CC	CC	TT	TT	TT	TT
	UTRINITY_DN5072_c0_g1_i1_441	G/C	TRINITY_DN5072_c0_g1_i1	441	NA	NA	+	TRINITY_DN5072_c0_g1_i1	NA	NA	NA	GG	GG	GG	GG	CC	CC
	UTRINITY_DN5072_c0_g1_i1_449	C/T	TRINITY_DN5072_c0_g1_i1	449	NA	NA	+	TRINITY_DN5072_c0_g1_i1	NA	NA	NA	CC	CC	CC	CC	TT	TT
	UTRINITY_DN8948_c0_g1_i3_1140	C/G	TRINITY_DN8948_c0_g1_i3	1140	NA	NA	+	TRINITY_DN8948_c0_g1_i3	NA	NA	NA	CC	CC	CC	CC	CG	CG
	UTRINITY_DN7437_c3_g1_i1_647	C/A	TRINITY_DN7437_c3_g1_i1	647	NA	NA	+	TRINITY_DN7437_c3_g1_i1	NA	NA	NA	CC	CC	CA	CA	CA	CA
	UTRINITY_DN7437_c3_g1_i1_702	A/G	TRINITY_DN7437_c3_g1_i1	702	NA	NA	+	TRINITY_DN7437_c3_g1_i1	NA	NA	NA	AA	AA	AG	AG	AG	AG
	UTRINITY_DN7437_c3_g1_i1_905	C/G	TRINITY_DN7437_c3_g1_i1	905	NA	NA	+	TRINITY_DN7437_c3_g1_i1	NA	NA	NA	CC	CC	CC	CC	CG	CG
	UTRINITY_DN7982_c0_g1_i3_2360	C/A	TRINITY_DN7982_c0_g1_i3	2360	NA	NA	+	TRINITY_DN7982_c0_g1_i3	NA	NA	NA	CC	CC	CC	CC	AA	AA
	UTRINITY_DN7982_c0_g1_i3_2408	G/T	TRINITY_DN7982_c0_g1_i3	2408	NA	NA	+	TRINITY_DN7982_c0_g1_i3	NA	NA	NA	GG	GG	GG	GG	TT	TT
	UTRINITY_DN7982_c0_g1_i3_2413	G/T	TRINITY_DN7982_c0_g1_i3	2413	NA	NA	+	TRINITY_DN7982_c0_g1_i3	NA	NA	NA	GG	GG	GG	GG	TT	TT
	UTRINITY_DN7982_c0_g1_i3_2417	C/T	TRINITY_DN7982_c0_g1_i3	2417	NA	NA	+	TRINITY_DN7982_c0_g1_i3	NA	NA	NA	CC	CC	CC	CC	TT	TT
	UTRINITY_DN7982_c0_g1_i3_2419	T/A	TRINITY_DN7982_c0_g1_i3	2419	NA	NA	+	TRINITY_DN7982_c0_g1_i3	NA	NA	NA	TT	TT	TT	TT	AA	AA
	UTRINITY_DN7982_c0_g1_i3_2562	T/C	TRINITY_DN7982_c0_g1_i3	2562	NA	NA	+	TRINITY_DN7982_c0_g1_i3	NA	NA	NA	TT	TT	TT	TT	CC	CC
	UTRINITY_DN7982_c0_g1_i3_2650	A/G	TRINITY_DN7982_c0_g1_i3	2650	NA	NA	+	TRINITY_DN7982_c0_g1_i3	NA	NA	NA	AA	AA	AA	AA	GG	GG
	UTRINITY_DN17798_c0_g1_i6_329	C/T	TRINITY_DN17798_c0_g1_i6	329	NA	NA	+	TRINITY_DN17798_c0_g1_i6	NA	NA	NA	CC	CC	TT	TT	CC	CC
	UTRINITY_DN12121_c0_g2_i1_888	T/C	TRINITY_DN12121_c0_g2_i1	888	NA	NA	+	TRINITY_DN12121_c0_g2_i1	NA	NA	NA	TT	TT	TT	TT	CC	CC
	UTRINITY_DN7955_c0_g1_i2_5337	G/A	TRINITY_DN7955_c0_g1_i2	5337	NA	NA	+	TRINITY_DN7955_c0_g1_i2	NA	NA	NA	GG	GG	GG	GG	AA	AA
	UTRINITY_DN7955_c0_g1_i2_5568	C/T	TRINITY_DN7955_c0_g1_i2	5568	NA	NA	+	TRINITY_DN7955_c0_g1_i2	NA	NA	NA	CC	CC	CC	CC	TT	TT
	UTRINITY_DN7955_c0_g1_i2_5569	A/G	TRINITY_DN7955_c0_g1_i2	5569	NA	NA	+	TRINITY_DN7955_c0_g1_i2	NA	NA	NA	AA	AA	AA	AA	GG	GG
	UTRINITY_DN7955_c0_g1_i2_5689	G/C	TRINITY_DN7955_c0_g1_i2	5689	NA	NA	+	TRINITY_DN7955_c0_g1_i2	NA	NA	NA	GG	GG	GG	GG	CC	CC
	UTRINITY_DN7955_c0_g1_i2_5752	C/T	TRINITY_DN7955_c0_g1_i2	5752	NA	NA	+	TRINITY_DN7955_c0_g1_i2	NA	NA	NA	CC	CC	CC	CC	TT	TT
	UTRINITY_DN7955_c0_g1_i2_5778	G/A	TRINITY_DN7955_c0_g1_i2	5778	NA	NA	+	TRINITY_DN7955_c0_g1_i2	NA	NA	NA	GG	GG	GG	GG	AA	AA
	UTRINITY_DN2299_c0_g1_i9_1282	T/A	TRINITY_DN2299_c0_g1_i9	1282	NA	NA	+	TRINITY_DN2299_c0_g1_i9	NA	NA	NA	TT	TT	AA	AA	TT	TT
	UTRINITY_DN23820_c1_g1_i2_2800	T/C	TRINITY_DN23820_c1_g1_i2	2800	NA	NA	+	TRINITY_DN23820_c1_g1_i2	NA	NA	NA	TC	TC	TC	TC	TT	TT
	UTRINITY_DN10048_c0_g1_i10_2187	C/G	TRINITY_DN10048_c0_g1_i10	2187	NA	NA	+	TRINITY_DN10048_c0_g1_i10	NA	NA	NA	CC	CC	CC	CC	GC	GC
	UTRINITY_DN13588_c0_g1_i2_816	G/A	TRINITY_DN13588_c0_g1_i2	816	NA	NA	+	TRINITY_DN13588_c0_g1_i2	NA	NA	NA	GG	GG	GG	GG	AG	AG
	UTRINITY_DN420_c0_g2_i4_582	C/T	TRINITY_DN420_c0_g2_i4	582	NA	NA	+	TRINITY_DN420_c0_g2_i4	NA	NA	NA	CC	CC	CC	CC	TT	TT
	UTRINITY_DN420_c0_g2_i4_591	A/G	TRINITY_DN420_c0_g2_i4	591	NA	NA	+	TRINITY_DN420_c0_g2_i4	NA	NA	NA	AA	AA	AA	AA	GG	GG
	UTRINITY_DN420_c0_g2_i4_670	T/G	TRINITY_DN420_c0_g2_i4	670	NA	NA	+	TRINITY_DN420_c0_g2_i4	NA	NA	NA	TT	TT	TT	TT	GG	GG
	UTRINITY_DN420_c0_g2_i4_798	C/T	TRINITY_DN420_c0_g2_i4	798	NA	NA	+	TRINITY_DN420_c0_g2_i4	NA	NA	NA	CC	CC	CC	CC	TT	TT
	UTRINITY_DN420_c0_g2_i4_823	C/A	TRINITY_DN420_c0_g2_i4	823	NA	NA	+	TRINITY_DN420_c0_g2_i4	NA	NA	NA	CC	CC	CC	CC	AA	AA
	UTRINITY_DN11892_c0_g1_i13_1081	A/T	TRINITY_DN11892_c0_g1_i13	1081	NA	NA	+	TRINITY_DN11892_c0_g1_i13	NA	NA	NA	AA	AA	AT	AT	AA	AA
	UTRINITY_DN11892_c0_g1_i13_1152	T/C	TRINITY_DN11892_c0_g1_i13	1152	NA	NA	+	TRINITY_DN11892_c0_g1_i13	NA	NA	NA	TT	TT	TT	TT	TC	TC
	UTRINITY_DN11892_c0_g1_i13_1185	A/G	TRINITY_DN11892_c0_g1_i13	1185	NA	NA	+	TRINITY_DN11892_c0_g1_i13	NA	NA	NA	AG	AG	AG	AG	AA	AA
	UTRINITY_DN11892_c0_g1_i13_1243	G/C	TRINITY_DN11892_c0_g1_i13	1243	NA	NA	+	TRINITY_DN11892_c0_g1_i13	NA	NA	NA	GC	GC	GC	GC	GG	GG
	UTRINITY_DN11892_c0_g1_i13_1349	G/A	TRINITY_DN11892_c0_g1_i13	1349	NA	NA	+	TRINITY_DN11892_c0_g1_i13	NA	NA	NA	GG	GG	GG	GG	GA	GA
	UTRINITY_DN11892_c0_g1_i13_1399	T/C	TRINITY_DN11892_c0_g1_i13	1399	NA	NA	+	TRINITY_DN11892_c0_g1_i13	NA	NA	NA	TC	TC	TT	TT	TC	TC
	UTRINITY_DN11892_c0_g1_i13_1446	T/C	TRINITY_DN11892_c0_g1_i13	1446	NA	NA	+	TRINITY_DN11892_c0_g1_i13	NA	NA	NA	TT	TT	TT	TT	TC	TC
	UTRINITY_DN11892_c0_g1_i13_1461	C/T	TRINITY_DN11892_c0_g1_i13	1461	NA	NA	+	TRINITY_DN11892_c0_g1_i13	NA	NA	NA	CT	CT	CT	CT	CC	CC
	UTRINITY_DN11892_c0_g1_i13_1990	C/A	TRINITY_DN11892_c0_g1_i13	1990	NA	NA	+	TRINITY_DN11892_c0_g1_i13	NA	NA	NA	CC	CC	CC	CC	CA	CA
	UTRINITY_DN24285_c0_g1_i3_205	G/A	TRINITY_DN24285_c0_g1_i3	205	NA	NA	+	TRINITY_DN24285_c0_g1_i3	NA	NA	NA	GA	GA	GG	GG	GG	GG
	UTRINITY_DN121852_c0_g1_i1_132	G/A	TRINITY_DN121852_c0_g1_i1	132	NA	NA	+	TRINITY_DN121852_c0_g1_i1	NA	NA	NA	GG	GG	GG	GG	AA	AA
	UTRINITY_DN3130_c0_g1_i7_3628	T/C	TRINITY_DN3130_c0_g1_i7	3628	NA	NA	+	TRINITY_DN3130_c0_g1_i7	NA	NA	NA	TT	TT	TT	TT	CC	CC
	UTRINITY_DN3130_c0_g1_i7_3692	C/T	TRINITY_DN3130_c0_g1_i7	3692	NA	NA	+	TRINITY_DN3130_c0_g1_i7	NA	NA	NA	CC	CC	CC	CC	TT	TT
	UTRINITY_DN3130_c0_g1_i7_3701	A/G	TRINITY_DN3130_c0_g1_i7	3701	NA	NA	+	TRINITY_DN3130_c0_g1_i7	NA	NA	NA	AA	AA	AA	AA	GG	GG
	UTRINITY_DN3365_c0_g1_i6_2173	T/C	TRINITY_DN3365_c0_g1_i6	2173	NA	NA	+	TRINITY_DN3365_c0_g1_i6	NA	NA	NA	TT	TT	CC	CC	TT	TT
	UTRINITY_DN7273_c1_g1_i2_550	C/T	TRINITY_DN7273_c1_g1_i2	550	NA	NA	+	TRINITY_DN7273_c1_g1_i2	NA	NA	NA	TT	TT	CC	CC	CC	CC
	UTRINITY_DN4161_c2_g1_i6_2763	T/C	TRINITY_DN4161_c2_g1_i6	2763	NA	NA	+	TRINITY_DN4161_c2_g1_i6	NA	NA	NA	CT	CT	CT	CT	TT	TT
	UTRINITY_DN3804_c0_g2_i1_681	G/T	TRINITY_DN3804_c0_g2_i1	681	NA	NA	+	TRINITY_DN3804_c0_g2_i1	NA	NA	NA	GG	GG	GG	GG	GT	GT
	UTRINITY_DN4707_c0_g1_i2_1602	G/A	TRINITY_DN4707_c0_g1_i2	1602	NA	NA	+	TRINITY_DN4707_c0_g1_i2	NA	NA	NA	GG	GG	GG	GG	AG	AG
	UTRINITY_DN9098_c0_g1_i1_1613	T/C	TRINITY_DN9098_c0_g1_i1	1613	NA	NA	+	TRINITY_DN9098_c0_g1_i1	NA	NA	NA	TT	TT	TC	TC	TC	TC
	UTRINITY_DN36423_c0_g1_i2_797	T/C	TRINITY_DN36423_c0_g1_i2	797	NA	NA	+	TRINITY_DN36423_c0_g1_i2	NA	NA	NA	TT	TT	TT	TT	CC	CC
	UTRINITY_DN7543_c0_g1_i4_1467	C/T	TRINITY_DN7543_c0_g1_i4	1467	NA	NA	+	TRINITY_DN7543_c0_g1_i4	NA	NA	NA	CC	CC	CC	CC	TT	TT
	UTRINITY_DN457_c1_g1_i7_1229	G/T	TRINITY_DN457_c1_g1_i7	1229	NA	NA	+	TRINITY_DN457_c1_g1_i7	NA	NA	NA	GG	GG	GG	GG	TT	TT
	UTRINITY_DN6896_c0_g1_i1_398	A/G	TRINITY_DN6896_c0_g1_i1	398	NA	NA	+	TRINITY_DN6896_c0_g1_i1	NA	NA	NA	AG	AG	AG	AG	AA	AA
	UTRINITY_DN366_c2_g2_i1_338	C/T	TRINITY_DN366_c2_g2_i1	338	NA	NA	+	TRINITY_DN366_c2_g2_i1	NA	NA	NA	CT	CT	CT	CT	CC	CC
	UTRINITY_DN366_c2_g2_i1_501	C/T	TRINITY_DN366_c2_g2_i1	501	NA	NA	+	TRINITY_DN366_c2_g2_i1	NA	NA	NA	CT	CT	CT	CT	CC	CC
	UTRINITY_DN366_c2_g2_i1_517	C/T	TRINITY_DN366_c2_g2_i1	517	NA	NA	+	TRINITY_DN366_c2_g2_i1	NA	NA	NA	CT	CT	CT	CT	CC	CC
	UTRINITY_DN22549_c0_g1_i2_2782	G/C	TRINITY_DN22549_c0_g1_i2	2782	NA	NA	+	TRINITY_DN22549_c0_g1_i2	NA	NA	NA	GG	GG	GG	GG	CC	CC
	UTRINITY_DN3405_c0_g1_i3_861	A/G	TRINITY_DN3405_c0_g1_i3	861	NA	NA	+	TRINITY_DN3405_c0_g1_i3	NA	NA	NA	AA	AA	AA	AA	GG	GG
	UTRINITY_DN4350_c0_g1_i12_812	C/T	TRINITY_DN4350_c0_g1_i12	812	NA	NA	+	TRINITY_DN4350_c0_g1_i12	NA	NA	NA	CC	CC	CC	CC	TT	TT
	UTRINITY_DN611_c0_g2_i3_1424	C/T	TRINITY_DN611_c0_g2_i3	1424	NA	NA	+	TRINITY_DN611_c0_g2_i3	NA	NA	NA	CC	CC	CT	CT	CT	CT
	UTRINITY_DN1023_c0_g1_i1_597	A/G	TRINITY_DN1023_c0_g1_i1	597	NA	NA	+	TRINITY_DN1023_c0_g1_i1	NA	NA	NA	AA	AA	AA	AA	GG	GG
	UTRINITY_DN2868_c0_g1_i2_1035	G/A	TRINITY_DN2868_c0_g1_i2	1035	NA	NA	+	TRINITY_DN2868_c0_g1_i2	NA	NA	NA	GG	GG	GA	GA	GG	GG
	UTRINITY_DN68603_c1_g1_i1_47	A/G	TRINITY_DN68603_c1_g1_i1	47	NA	NA	+	TRINITY_DN68603_c1_g1_i1	NA	NA	NA	GG	GG	AA	AA	AA	AA
	UTRINITY_DN404_c0_g2_i1_371	G/A	TRINITY_DN404_c0_g2_i1	371	NA	NA	+	TRINITY_DN404_c0_g2_i1	NA	NA	NA	GA	GA	GA	GA	GG	GG
	UTRINITY_DN10648_c0_g1_i1_1777	A/G	TRINITY_DN10648_c0_g1_i1	1777	NA	NA	+	TRINITY_DN10648_c0_g1_i1	NA	NA	NA	AA	AA	AA	AA	GG	GG
	UTRINITY_DN4249_c0_g1_i5_1635	C/A	TRINITY_DN4249_c0_g1_i5	1635	NA	NA	+	TRINITY_DN4249_c0_g1_i5	NA	NA	NA	CC	CC	CC	CC	CA	CA
	UTRINITY_DN96122_c0_g1_i1_131	C/A	TRINITY_DN96122_c0_g1_i1	131	NA	NA	+	TRINITY_DN96122_c0_g1_i1	NA	NA	NA	CC	CC	CC	CC	CA	CA
	UTRINITY_DN96122_c0_g1_i1_344	C/G	TRINITY_DN96122_c0_g1_i1	344	NA	NA	+	TRINITY_DN96122_c0_g1_i1	NA	NA	NA	CC	CC	CC	CC	CG	CG
	UTRINITY_DN15471_c0_g2_i3_292	C/G	TRINITY_DN15471_c0_g2_i3	292	NA	NA	+	TRINITY_DN15471_c0_g2_i3	NA	NA	NA	CC	CC	CC	CC	GG	GG
	UTRINITY_DN9110_c0_g1_i8_2293	G/A	TRINITY_DN9110_c0_g1_i8	2293	NA	NA	+	TRINITY_DN9110_c0_g1_i8	NA	NA	NA	GG	GG	GA	GA	GG	GG
	UTRINITY_DN9110_c0_g1_i8_2405	A/G	TRINITY_DN9110_c0_g1_i8	2405	NA	NA	+	TRINITY_DN9110_c0_g1_i8	NA	NA	NA	AA	AA	AA	AA	GG	GG
	UTRINITY_DN10652_c0_g1_i5_612	G/A	TRINITY_DN10652_c0_g1_i5	612	NA	NA	+	TRINITY_DN10652_c0_g1_i5	NA	NA	NA	GG	GG	AA	AA	GG	GG
	UTRINITY_DN1405_c0_g1_i1_394	G/C	TRINITY_DN1405_c0_g1_i1	394	NA	NA	+	TRINITY_DN1405_c0_g1_i1	NA	NA	NA	GC	GC	GC	GC	GG	GG
	UTRINITY_DN1405_c0_g1_i1_400	C/T	TRINITY_DN1405_c0_g1_i1	400	NA	NA	+	TRINITY_DN1405_c0_g1_i1	NA	NA	NA	CT	CT	CT	CT	CC	CC
	UTRINITY_DN1405_c0_g1_i1_544	C/G	TRINITY_DN1405_c0_g1_i1	544	NA	NA	+	TRINITY_DN1405_c0_g1_i1	NA	NA	NA	CC	CC	CC	CC	CG	CG
	UTRINITY_DN1405_c0_g1_i1_580	C/G	TRINITY_DN1405_c0_g1_i1	580	NA	NA	+	TRINITY_DN1405_c0_g1_i1	NA	NA	NA	CC	CC	CC	CC	CG	CG
	UTRINITY_DN1405_c0_g1_i1_582	C/T	TRINITY_DN1405_c0_g1_i1	582	NA	NA	+	TRINITY_DN1405_c0_g1_i1	NA	NA	NA	CC	CC	CC	CC	CT	CT
	UTRINITY_DN1405_c0_g1_i1_610	T/C	TRINITY_DN1405_c0_g1_i1	610	NA	NA	+	TRINITY_DN1405_c0_g1_i1	NA	NA	NA	TC	TC	TC	TC	TT	TT
	UTRINITY_DN1405_c0_g1_i1_612	C/G	TRINITY_DN1405_c0_g1_i1	612	NA	NA	+	TRINITY_DN1405_c0_g1_i1	NA	NA	NA	CC	CC	CC	CC	GG	GG
	UTRINITY_DN1405_c0_g1_i1_665	A/C	TRINITY_DN1405_c0_g1_i1	665	NA	NA	+	TRINITY_DN1405_c0_g1_i1	NA	NA	NA	AC	AC	AC	AC	AA	AA
	UTRINITY_DN1405_c0_g1_i1_692	A/G	TRINITY_DN1405_c0_g1_i1	692	NA	NA	+	TRINITY_DN1405_c0_g1_i1	NA	NA	NA	AG	AG	AA	AA	AA	AA
	UTRINITY_DN1405_c0_g1_i1_705	A/G	TRINITY_DN1405_c0_g1_i1	705	NA	NA	+	TRINITY_DN1405_c0_g1_i1	NA	NA	NA	AG	AG	AA	AA	AA	AA
	UTRINITY_DN1405_c0_g1_i1_731	A/G	TRINITY_DN1405_c0_g1_i1	731	NA	NA	+	TRINITY_DN1405_c0_g1_i1	NA	NA	NA	AG	AG	AG	AG	AA	AA
	UTRINITY_DN1405_c0_g1_i1_787	G/C	TRINITY_DN1405_c0_g1_i1	787	NA	NA	+	TRINITY_DN1405_c0_g1_i1	NA	NA	NA	CG	CG	CG	CG	GG	GG
	UTRINITY_DN1405_c0_g1_i1_793	G/C	TRINITY_DN1405_c0_g1_i1	793	NA	NA	+	TRINITY_DN1405_c0_g1_i1	NA	NA	NA	GG	GG	GG	GG	GC	GC
	UTRINITY_DN1405_c0_g1_i1_798	C/T	TRINITY_DN1405_c0_g1_i1	798	NA	NA	+	TRINITY_DN1405_c0_g1_i1	NA	NA	NA	TC	TC	TC	TC	CC	CC
	UTRINITY_DN1405_c0_g1_i1_824	C/T	TRINITY_DN1405_c0_g1_i1	824	NA	NA	+	TRINITY_DN1405_c0_g1_i1	NA	NA	NA	CC	CC	CC	CC	CT	CT
	UTRINITY_DN1405_c0_g1_i1_832	G/T	TRINITY_DN1405_c0_g1_i1	832	NA	NA	+	TRINITY_DN1405_c0_g1_i1	NA	NA	NA	TG	TG	TG	TG	GG	GG
	UTRINITY_DN1405_c0_g1_i1_883	C/G	TRINITY_DN1405_c0_g1_i1	883	NA	NA	+	TRINITY_DN1405_c0_g1_i1	NA	NA	NA	CC	CC	CC	CC	CG	CG
	UTRINITY_DN1405_c0_g1_i1_1024	C/T	TRINITY_DN1405_c0_g1_i1	1024	NA	NA	+	TRINITY_DN1405_c0_g1_i1	NA	NA	NA	TC	TC	TC	TC	CC	CC
	UTRINITY_DN1405_c0_g1_i1_1042	C/R	TRINITY_DN1405_c0_g1_i1	1042	NA	NA	+	TRINITY_DN1405_c0_g1_i1	NA	NA	NA	AC	AC	AC	AC	GC	GC
	UTRINITY_DN1405_c0_g1_i1_1069	C/G	TRINITY_DN1405_c0_g1_i1	1069	NA	NA	+	TRINITY_DN1405_c0_g1_i1	NA	NA	NA	CG	CG	CG	CG	CC	CC
	UTRINITY_DN1405_c0_g1_i1_1099	T/C	TRINITY_DN1405_c0_g1_i1	1099	NA	NA	+	TRINITY_DN1405_c0_g1_i1	NA	NA	NA	CT	CT	CT	CT	TT	TT
	UTRINITY_DN1405_c0_g1_i1_1368	A/G	TRINITY_DN1405_c0_g1_i1	1368	NA	NA	+	TRINITY_DN1405_c0_g1_i1	NA	NA	NA	AA	AA	AA	AA	GG	GG
	UTRINITY_DN1405_c0_g1_i1_1369	A/G	TRINITY_DN1405_c0_g1_i1	1369	NA	NA	+	TRINITY_DN1405_c0_g1_i1	NA	NA	NA	AA	AA	AA	AA	GG	GG
	UTRINITY_DN4675_c4_g3_i1_231	C/T	TRINITY_DN4675_c4_g3_i1	231	NA	NA	+	TRINITY_DN4675_c4_g3_i1	NA	NA	NA	CC	CC	CC	CC	CT	CT
	UTRINITY_DN7478_c0_g1_i5_989	C/T	TRINITY_DN7478_c0_g1_i5	989	NA	NA	+	TRINITY_DN7478_c0_g1_i5	NA	NA	NA	CC	CC	CT	CT	CC	CC
	UTRINITY_DN17910_c0_g1_i2_263	G/A	TRINITY_DN17910_c0_g1_i2	263	NA	NA	+	TRINITY_DN17910_c0_g1_i2	NA	NA	NA	GG	GG	GG	GG	GA	GA
	UTRINITY_DN17910_c0_g1_i2_266	C/T	TRINITY_DN17910_c0_g1_i2	266	NA	NA	+	TRINITY_DN17910_c0_g1_i2	NA	NA	NA	CC	CC	CC	CC	CT	CT
	UTRINITY_DN14791_c0_g3_i2_84	C/G	TRINITY_DN14791_c0_g3_i2	84	NA	NA	+	TRINITY_DN14791_c0_g3_i2	NA	NA	NA	CC	CC	CC	CC	GG	GG
	UTRINITY_DN14791_c0_g3_i2_88	T/C	TRINITY_DN14791_c0_g3_i2	88	NA	NA	+	TRINITY_DN14791_c0_g3_i2	NA	NA	NA	TT	TT	TT	TT	CC	CC
	UTRINITY_DN12357_c0_g1_i4_312	T/C	TRINITY_DN12357_c0_g1_i4	312	NA	NA	+	TRINITY_DN12357_c0_g1_i4	NA	NA	NA	TT	TT	TT	TT	CC	CC
	UTRINITY_DN3575_c0_g2_i1_288	C/G	TRINITY_DN3575_c0_g2_i1	288	NA	NA	+	TRINITY_DN3575_c0_g2_i1	NA	NA	NA	CG	CG	CG	CG	CC	CC
	UTRINITY_DN3575_c0_g2_i1_292	C/T	TRINITY_DN3575_c0_g2_i1	292	NA	NA	+	TRINITY_DN3575_c0_g2_i1	NA	NA	NA	CT	CT	CT	CT	CC	CC
	UTRINITY_DN3575_c0_g2_i1_336	A/Y	TRINITY_DN3575_c0_g2_i1	336	NA	NA	+	TRINITY_DN3575_c0_g2_i1	NA	NA	NA	AT	AT	AT	AT	AC	AC
	UTRINITY_DN3575_c0_g2_i1_354	C/G	TRINITY_DN3575_c0_g2_i1	354	NA	NA	+	TRINITY_DN3575_c0_g2_i1	NA	NA	NA	CC	CC	CC	CC	CG	CG
	UTRINITY_DN3575_c0_g2_i1_405	G/C	TRINITY_DN3575_c0_g2_i1	405	NA	NA	+	TRINITY_DN3575_c0_g2_i1	NA	NA	NA	GC	GC	GC	GC	GG	GG
	UTRINITY_DN3575_c0_g2_i1_546	G/A	TRINITY_DN3575_c0_g2_i1	546	NA	NA	+	TRINITY_DN3575_c0_g2_i1	NA	NA	NA	GA	GA	GA	GA	GG	GG
	UTRINITY_DN3575_c0_g2_i1_547	T/C	TRINITY_DN3575_c0_g2_i1	547	NA	NA	+	TRINITY_DN3575_c0_g2_i1	NA	NA	NA	TT	TT	TT	TT	TC	TC
	UTRINITY_DN3575_c0_g2_i1_615	C/T	TRINITY_DN3575_c0_g2_i1	615	NA	NA	+	TRINITY_DN3575_c0_g2_i1	NA	NA	NA	CT	CT	CT	CT	CC	CC
	UTRINITY_DN3575_c0_g2_i1_630	C/G	TRINITY_DN3575_c0_g2_i1	630	NA	NA	+	TRINITY_DN3575_c0_g2_i1	NA	NA	NA	CG	CG	CG	CG	CC	CC
	UTRINITY_DN3575_c0_g2_i1_658	A/G	TRINITY_DN3575_c0_g2_i1	658	NA	NA	+	TRINITY_DN3575_c0_g2_i1	NA	NA	NA	AA	AA	AA	AA	AG	AG
	UTRINITY_DN3575_c0_g2_i1_750	G/C	TRINITY_DN3575_c0_g2_i1	750	NA	NA	+	TRINITY_DN3575_c0_g2_i1	NA	NA	NA	GC	GC	GC	GC	GG	GG
	UTRINITY_DN3575_c0_g2_i1_831	C/G	TRINITY_DN3575_c0_g2_i1	831	NA	NA	+	TRINITY_DN3575_c0_g2_i1	NA	NA	NA	CC	CC	CC	CC	CG	CG
	UTRINITY_DN3575_c0_g2_i1_833	G/A	TRINITY_DN3575_c0_g2_i1	833	NA	NA	+	TRINITY_DN3575_c0_g2_i1	NA	NA	NA	GG	GG	GG	GG	GA	GA
	UTRINITY_DN3575_c0_g2_i1_837	C/T	TRINITY_DN3575_c0_g2_i1	837	NA	NA	+	TRINITY_DN3575_c0_g2_i1	NA	NA	NA	CC	CC	CC	CC	CT	CT
	UTRINITY_DN3575_c0_g2_i1_893	A/G	TRINITY_DN3575_c0_g2_i1	893	NA	NA	+	TRINITY_DN3575_c0_g2_i1	NA	NA	NA	AG	AG	AG	AG	AA	AA
	UTRINITY_DN3575_c0_g2_i1_903	G/C	TRINITY_DN3575_c0_g2_i1	903	NA	NA	+	TRINITY_DN3575_c0_g2_i1	NA	NA	NA	GG	GG	GG	GG	GC	GC
	UTRINITY_DN12092_c1_g1_i1_145	G/A	TRINITY_DN12092_c1_g1_i1	145	NA	NA	+	TRINITY_DN12092_c1_g1_i1	NA	NA	NA	GG	GG	GA	GA	GA	GA
	UTRINITY_DN77560_c2_g1_i1_188	T/C	TRINITY_DN77560_c2_g1_i1	188	NA	NA	+	TRINITY_DN77560_c2_g1_i1	NA	NA	NA	TT	TT	TT	TT	CC	CC
	UTRINITY_DN87255_c2_g1_i1_122	C/T	TRINITY_DN87255_c2_g1_i1	122	NA	NA	+	TRINITY_DN87255_c2_g1_i1	NA	NA	NA	CC	CC	TT	TT	CC	CC
	UTRINITY_DN1583_c0_g1_i1_420	C/T	TRINITY_DN1583_c0_g1_i1	420	NA	NA	+	TRINITY_DN1583_c0_g1_i1	NA	NA	NA	CT	CT	CC	CC	CT	CT
	UTRINITY_DN1583_c0_g1_i1_983	C/T	TRINITY_DN1583_c0_g1_i1	983	NA	NA	+	TRINITY_DN1583_c0_g1_i1	NA	NA	NA	CC	CC	CT	CT	CT	CT
	UTRINITY_DN13237_c0_g1_i5_1136	G/A	TRINITY_DN13237_c0_g1_i5	1136	NA	NA	+	TRINITY_DN13237_c0_g1_i5	NA	NA	NA	GG	GG	GG	GG	GA	GA
	UTRINITY_DN13237_c0_g1_i5_1166	A/G	TRINITY_DN13237_c0_g1_i5	1166	NA	NA	+	TRINITY_DN13237_c0_g1_i5	NA	NA	NA	AA	AA	AA	AA	AG	AG
	UTRINITY_DN13237_c0_g1_i5_1167	C/T	TRINITY_DN13237_c0_g1_i5	1167	NA	NA	+	TRINITY_DN13237_c0_g1_i5	NA	NA	NA	CC	CC	CC	CC	CT	CT
	UTRINITY_DN710_c0_g1_i10_640	G/A	TRINITY_DN710_c0_g1_i10	640	NA	NA	+	TRINITY_DN710_c0_g1_i10	NA	NA	NA	AA	AA	GG	GG	GG	GG
	UTRINITY_DN3596_c0_g1_i4_1586	G/A	TRINITY_DN3596_c0_g1_i4	1586	NA	NA	+	TRINITY_DN3596_c0_g1_i4	NA	NA	NA	GG	GG	GG	GG	AA	AA
	UTRINITY_DN1055_c1_g1_i1_842	C/G	TRINITY_DN1055_c1_g1_i1	842	NA	NA	+	TRINITY_DN1055_c1_g1_i1	NA	NA	NA	GG	GG	CC	CC	CC	CC
	UTRINITY_DN1055_c1_g1_i1_848	C/A	TRINITY_DN1055_c1_g1_i1	848	NA	NA	+	TRINITY_DN1055_c1_g1_i1	NA	NA	NA	AA	AA	CC	CC	CC	CC
	UTRINITY_DN1055_c1_g1_i1_854	A/G	TRINITY_DN1055_c1_g1_i1	854	NA	NA	+	TRINITY_DN1055_c1_g1_i1	NA	NA	NA	GG	GG	AA	AA	AA	AA
	UTRINITY_DN879_c0_g1_i2_268	A/G	TRINITY_DN879_c0_g1_i2	268	NA	NA	+	TRINITY_DN879_c0_g1_i2	NA	NA	NA	AA	AA	AA	AA	GG	GG
	UTRINITY_DN879_c0_g1_i2_305	C/T	TRINITY_DN879_c0_g1_i2	305	NA	NA	+	TRINITY_DN879_c0_g1_i2	NA	NA	NA	CC	CC	CC	CC	TT	TT
	UTRINITY_DN2286_c0_g1_i1_903	G/A	TRINITY_DN2286_c0_g1_i1	903	NA	NA	+	TRINITY_DN2286_c0_g1_i1	NA	NA	NA	GG	GG	GG	GG	AA	AA
	UTRINITY_DN2286_c0_g1_i1_905	T/C	TRINITY_DN2286_c0_g1_i1	905	NA	NA	+	TRINITY_DN2286_c0_g1_i1	NA	NA	NA	TT	TT	TT	TT	CC	CC
	UTRINITY_DN8631_c0_g1_i3_1350	G/A	TRINITY_DN8631_c0_g1_i3	1350	NA	NA	+	TRINITY_DN8631_c0_g1_i3	NA	NA	NA	GG	GG	GG	GG	GA	GA
	UTRINITY_DN8631_c0_g1_i3_1411	A/G	TRINITY_DN8631_c0_g1_i3	1411	NA	NA	+	TRINITY_DN8631_c0_g1_i3	NA	NA	NA	AA	AA	AG	AG	AG	AG
	UTRINITY_DN3620_c0_g1_i3_503	C/T	TRINITY_DN3620_c0_g1_i3	503	NA	NA	+	TRINITY_DN3620_c0_g1_i3	NA	NA	NA	CC	CC	TT	TT	CC	CC
	UTRINITY_DN35793_c0_g1_i2_131	T/S	TRINITY_DN35793_c0_g1_i2	131	NA	NA	+	TRINITY_DN35793_c0_g1_i2	NA	NA	NA	TC	TC	TG	TG	TT	TT
	UTRINITY_DN4260_c0_g2_i6_398	T/C	TRINITY_DN4260_c0_g2_i6	398	NA	NA	+	TRINITY_DN4260_c0_g2_i6	NA	NA	NA	TT	TT	TT	TT	CC	CC
	UTRINITY_DN4260_c0_g2_i6_424	G/C	TRINITY_DN4260_c0_g2_i6	424	NA	NA	+	TRINITY_DN4260_c0_g2_i6	NA	NA	NA	GG	GG	GG	GG	CC	CC
	UTRINITY_DN4260_c0_g2_i6_479	G/C	TRINITY_DN4260_c0_g2_i6	479	NA	NA	+	TRINITY_DN4260_c0_g2_i6	NA	NA	NA	GG	GG	GG	GG	CC	CC
	UTRINITY_DN4260_c0_g2_i6_490	T/C	TRINITY_DN4260_c0_g2_i6	490	NA	NA	+	TRINITY_DN4260_c0_g2_i6	NA	NA	NA	TT	TT	TT	TT	CC	CC
	UTRINITY_DN4260_c0_g2_i6_1098	T/C	TRINITY_DN4260_c0_g2_i6	1098	NA	NA	+	TRINITY_DN4260_c0_g2_i6	NA	NA	NA	TT	TT	TT	TT	CC	CC
	UTRINITY_DN8237_c0_g1_i4_649	C/G	TRINITY_DN8237_c0_g1_i4	649	NA	NA	+	TRINITY_DN8237_c0_g1_i4	NA	NA	NA	CC	CC	GG	GG	CC	CC
	UTRINITY_DN12057_c0_g1_i2_462	C/T	TRINITY_DN12057_c0_g1_i2	462	NA	NA	+	TRINITY_DN12057_c0_g1_i2	NA	NA	NA	CC	CC	CT	CT	CT	CT
	UTRINITY_DN4456_c0_g2_i2_312	A/T	TRINITY_DN4456_c0_g2_i2	312	NA	NA	+	TRINITY_DN4456_c0_g2_i2	NA	NA	NA	AA	AA	TT	TT	AA	AA
	UTRINITY_DN241_c0_g1_i10_1390	T/A	TRINITY_DN241_c0_g1_i10	1390	NA	NA	+	TRINITY_DN241_c0_g1_i10	NA	NA	NA	TT	TT	AA	AA	TT	TT
	UTRINITY_DN3020_c1_g1_i1_255	T/C	TRINITY_DN3020_c1_g1_i1	255	NA	NA	+	TRINITY_DN3020_c1_g1_i1	NA	NA	NA	TT	TT	TT	TT	TC	TC
	UTRINITY_DN3020_c1_g1_i1_262	G/C	TRINITY_DN3020_c1_g1_i1	262	NA	NA	+	TRINITY_DN3020_c1_g1_i1	NA	NA	NA	GG	GG	GG	GG	GC	GC
	UTRINITY_DN10072_c0_g1_i2_487	C/A	TRINITY_DN10072_c0_g1_i2	487	NA	NA	+	TRINITY_DN10072_c0_g1_i2	NA	NA	NA	CC	CC	CC	CC	AA	AA
	UTRINITY_DN4700_c0_g1_i7_541	T/C	TRINITY_DN4700_c0_g1_i7	541	NA	NA	+	TRINITY_DN4700_c0_g1_i7	NA	NA	NA	TT	TT	TT	TT	CC	CC
	UTRINITY_DN9209_c0_g1_i1_2593	T/A	TRINITY_DN9209_c0_g1_i1	2593	NA	NA	+	TRINITY_DN9209_c0_g1_i1	NA	NA	NA	TT	TT	TT	TT	AA	AA
	UTRINITY_DN9209_c0_g1_i1_2595	G/T	TRINITY_DN9209_c0_g1_i1	2595	NA	NA	+	TRINITY_DN9209_c0_g1_i1	NA	NA	NA	GG	GG	GG	GG	TT	TT
	UTRINITY_DN4220_c0_g1_i4_1410	T/A	TRINITY_DN4220_c0_g1_i4	1410	NA	NA	+	TRINITY_DN4220_c0_g1_i4	NA	NA	NA	TA	TA	TA	TA	TT	TT
	UTRINITY_DN4220_c0_g1_i4_1454	T/C	TRINITY_DN4220_c0_g1_i4	1454	NA	NA	+	TRINITY_DN4220_c0_g1_i4	NA	NA	NA	TC	TC	TC	TC	TT	TT
	UTRINITY_DN4220_c0_g1_i4_1455	T/G	TRINITY_DN4220_c0_g1_i4	1455	NA	NA	+	TRINITY_DN4220_c0_g1_i4	NA	NA	NA	TG	TG	TG	TG	TT	TT
	UTRINITY_DN2340_c0_g1_i3_324	C/A	TRINITY_DN2340_c0_g1_i3	324	NA	NA	+	TRINITY_DN2340_c0_g1_i3	NA	NA	NA	AA	AA	CC	CC	CC	CC
	UTRINITY_DN2340_c0_g1_i3_556	A/G	TRINITY_DN2340_c0_g1_i3	556	NA	NA	+	TRINITY_DN2340_c0_g1_i3	NA	NA	NA	AA	AA	AA	AA	AG	AG
	UTRINITY_DN340_c0_g2_i2_1087	G/A	TRINITY_DN340_c0_g2_i2	1087	NA	NA	+	TRINITY_DN340_c0_g2_i2	NA	NA	NA	GG	GG	GG	GG	AA	AA
	UTRINITY_DN340_c0_g2_i2_1117	T/C	TRINITY_DN340_c0_g2_i2	1117	NA	NA	+	TRINITY_DN340_c0_g2_i2	NA	NA	NA	TT	TT	TT	TT	CC	CC
	UTRINITY_DN3520_c0_g1_i6_564	C/G	TRINITY_DN3520_c0_g1_i6	564	NA	NA	+	TRINITY_DN3520_c0_g1_i6	NA	NA	NA	CC	CC	GG	GG	CC	CC
	UTRINITY_DN32383_c0_g1_i1_448	C/T	TRINITY_DN32383_c0_g1_i1	448	NA	NA	+	TRINITY_DN32383_c0_g1_i1	NA	NA	NA	CC	CC	CC	CC	TT	TT
	UTRINITY_DN14354_c0_g1_i3_84	G/A	TRINITY_DN14354_c0_g1_i3	84	NA	NA	+	TRINITY_DN14354_c0_g1_i3	NA	NA	NA	GG	GG	GG	GG	AA	AA
	UTRINITY_DN14354_c0_g1_i3_91	T/C	TRINITY_DN14354_c0_g1_i3	91	NA	NA	+	TRINITY_DN14354_c0_g1_i3	NA	NA	NA	TT	TT	TT	TT	CC	CC
	UTRINITY_DN14354_c0_g1_i3_136	C/A	TRINITY_DN14354_c0_g1_i3	136	NA	NA	+	TRINITY_DN14354_c0_g1_i3	NA	NA	NA	CC	CC	CC	CC	AA	AA
	UTRINITY_DN11121_c0_g1_i5_1191	T/C	TRINITY_DN11121_c0_g1_i5	1191	NA	NA	+	TRINITY_DN11121_c0_g1_i5	NA	NA	NA	TT	TT	TT	TT	TC	TC
	UTRINITY_DN11121_c0_g1_i5_1575	A/C	TRINITY_DN11121_c0_g1_i5	1575	NA	NA	+	TRINITY_DN11121_c0_g1_i5	NA	NA	NA	AC	AC	AC	AC	AA	AA
	UTRINITY_DN2375_c0_g1_i5_807	G/A	TRINITY_DN2375_c0_g1_i5	807	NA	NA	+	TRINITY_DN2375_c0_g1_i5	NA	NA	NA	GG	GG	GG	GG	AA	AA
	UTRINITY_DN2375_c0_g1_i5_814	C/T	TRINITY_DN2375_c0_g1_i5	814	NA	NA	+	TRINITY_DN2375_c0_g1_i5	NA	NA	NA	CC	CC	CC	CC	TT	TT
	UTRINITY_DN13491_c0_g1_i1_642	C/T	TRINITY_DN13491_c0_g1_i1	642	NA	NA	+	TRINITY_DN13491_c0_g1_i1	NA	NA	NA	CC	CC	CT	CT	CT	CT
	UTRINITY_DN34506_c0_g1_i1_129	A/C	TRINITY_DN34506_c0_g1_i1	129	NA	NA	+	TRINITY_DN34506_c0_g1_i1	NA	NA	NA	AA	AA	AA	AA	CC	CC
	UTRINITY_DN3770_c0_g1_i5_472	A/C	TRINITY_DN3770_c0_g1_i5	472	NA	NA	+	TRINITY_DN3770_c0_g1_i5	NA	NA	NA	CC	CC	AA	AA	AA	AA
	UTRINITY_DN29533_c0_g1_i2_136	C/T	TRINITY_DN29533_c0_g1_i2	136	NA	NA	+	TRINITY_DN29533_c0_g1_i2	NA	NA	NA	CC	CC	CC	CC	TT	TT
	UTRINITY_DN1167_c0_g1_i5_1578	G/A	TRINITY_DN1167_c0_g1_i5	1578	NA	NA	+	TRINITY_DN1167_c0_g1_i5	NA	NA	NA	GA	GA	GA	GA	GG	GG
	UTRINITY_DN11_c0_g1_i10_477	G/A	TRINITY_DN11_c0_g1_i10	477	NA	NA	+	TRINITY_DN11_c0_g1_i10	NA	NA	NA	AA	AA	GG	GG	GG	GG
	UTRINITY_DN8563_c0_g1_i2_237	C/G	TRINITY_DN8563_c0_g1_i2	237	NA	NA	+	TRINITY_DN8563_c0_g1_i2	NA	NA	NA	CC	CC	GC	GC	CC	CC
	UTRINITY_DN108_c2_g1_i4_545	T/C	TRINITY_DN108_c2_g1_i4	545	NA	NA	+	TRINITY_DN108_c2_g1_i4	NA	NA	NA	TT	TT	TT	TT	CC	CC
	UTRINITY_DN108_c2_g1_i4_560	A/T	TRINITY_DN108_c2_g1_i4	560	NA	NA	+	TRINITY_DN108_c2_g1_i4	NA	NA	NA	AA	AA	AA	AA	TT	TT
	UTRINITY_DN4106_c0_g1_i6_1032	C/G	TRINITY_DN4106_c0_g1_i6	1032	NA	NA	+	TRINITY_DN4106_c0_g1_i6	NA	NA	NA	GG	GG	CC	CC	CC	CC
	UTRINITY_DN9976_c0_g2_i5_989	G/A	TRINITY_DN9976_c0_g2_i5	989	NA	NA	+	TRINITY_DN9976_c0_g2_i5	NA	NA	NA	GG	GG	AA	AA	GG	GG
	UTRINITY_DN9976_c0_g2_i5_1023	G/T	TRINITY_DN9976_c0_g2_i5	1023	NA	NA	+	TRINITY_DN9976_c0_g2_i5	NA	NA	NA	GG	GG	TT	TT	GG	GG
	UTRINITY_DN9641_c0_g1_i2_2734	G/C	TRINITY_DN9641_c0_g1_i2	2734	NA	NA	+	TRINITY_DN9641_c0_g1_i2	NA	NA	NA	CC	CC	GG	GG	GG	GG
	UTRINITY_DN37898_c0_g1_i2_101	C/T	TRINITY_DN37898_c0_g1_i2	101	NA	NA	+	TRINITY_DN37898_c0_g1_i2	NA	NA	NA	CC	CC	CC	CC	TT	TT
	UTRINITY_DN36599_c0_g1_i2_142	T/C	TRINITY_DN36599_c0_g1_i2	142	NA	NA	+	TRINITY_DN36599_c0_g1_i2	NA	NA	NA	CT	CT	CC	CC	TT	TT
	UTRINITY_DN15947_c0_g1_i4_207	T/A	TRINITY_DN15947_c0_g1_i4	207	NA	NA	+	TRINITY_DN15947_c0_g1_i4	NA	NA	NA	TT	TT	TT	TT	AA	AA
	UTRINITY_DN7796_c0_g1_i4_286	C/T	TRINITY_DN7796_c0_g1_i4	286	NA	NA	+	TRINITY_DN7796_c0_g1_i4	NA	NA	NA	TT	TT	CC	CC	CC	CC
	UTRINITY_DN7796_c0_g1_i4_287	G/A	TRINITY_DN7796_c0_g1_i4	287	NA	NA	+	TRINITY_DN7796_c0_g1_i4	NA	NA	NA	AA	AA	GG	GG	GG	GG
	UTRINITY_DN2610_c0_g1_i1_1253	G/A	TRINITY_DN2610_c0_g1_i1	1253	NA	NA	+	TRINITY_DN2610_c0_g1_i1	NA	NA	NA	GG	GG	GG	GG	AA	AA
	UTRINITY_DN13199_c0_g1_i2_554	C/A	TRINITY_DN13199_c0_g1_i2	554	NA	NA	+	TRINITY_DN13199_c0_g1_i2	NA	NA	NA	CC	CC	CA	CA	CC	CC
	UTRINITY_DN2493_c0_g1_i7_1849	T/A	TRINITY_DN2493_c0_g1_i7	1849	NA	NA	+	TRINITY_DN2493_c0_g1_i7	NA	NA	NA	AA	AA	TT	TT	TT	TT
	UTRINITY_DN2493_c0_g1_i7_1859	G/A	TRINITY_DN2493_c0_g1_i7	1859	NA	NA	+	TRINITY_DN2493_c0_g1_i7	NA	NA	NA	AA	AA	GG	GG	GG	GG
	UTRINITY_DN4256_c0_g1_i4_639	A/G	TRINITY_DN4256_c0_g1_i4	639	NA	NA	+	TRINITY_DN4256_c0_g1_i4	NA	NA	NA	GG	GG	AA	AA	AA	AA
	UTRINITY_DN4256_c0_g1_i4_642	A/G	TRINITY_DN4256_c0_g1_i4	642	NA	NA	+	TRINITY_DN4256_c0_g1_i4	NA	NA	NA	AA	AA	GG	GG	AA	AA
	UTRINITY_DN9143_c1_g2_i3_436	T/G	TRINITY_DN9143_c1_g2_i3	436	NA	NA	+	TRINITY_DN9143_c1_g2_i3	NA	NA	NA	TT	TT	TG	TG	TT	TT
	UTRINITY_DN17562_c0_g2_i1_450	G/A	TRINITY_DN17562_c0_g2_i1	450	NA	NA	+	TRINITY_DN17562_c0_g2_i1	NA	NA	NA	GG	GG	GG	GG	AA	AA
	UTRINITY_DN1258_c0_g1_i9_85	T/G	TRINITY_DN1258_c0_g1_i9	85	NA	NA	+	TRINITY_DN1258_c0_g1_i9	NA	NA	NA	TT	TT	GG	GG	TT	TT
	UTRINITY_DN7089_c0_g3_i1_74	G/A	TRINITY_DN7089_c0_g3_i1	74	NA	NA	+	TRINITY_DN7089_c0_g3_i1	NA	NA	NA	GG	GG	GG	GG	GA	GA
	UTRINITY_DN7089_c0_g3_i1_155	A/G	TRINITY_DN7089_c0_g3_i1	155	NA	NA	+	TRINITY_DN7089_c0_g3_i1	NA	NA	NA	AA	AA	AG	AG	AG	AG
	UTRINITY_DN7089_c0_g3_i1_160	T/C	TRINITY_DN7089_c0_g3_i1	160	NA	NA	+	TRINITY_DN7089_c0_g3_i1	NA	NA	NA	TT	TT	TC	TC	TC	TC
	UTRINITY_DN7089_c0_g3_i1_174	G/A	TRINITY_DN7089_c0_g3_i1	174	NA	NA	+	TRINITY_DN7089_c0_g3_i1	NA	NA	NA	GG	GG	GG	GG	GA	GA
	UTRINITY_DN2219_c0_g2_i2_84	G/C	TRINITY_DN2219_c0_g2_i2	84	NA	NA	+	TRINITY_DN2219_c0_g2_i2	NA	NA	NA	GG	GG	GG	GG	CC	CC
	UTRINITY_DN1988_c1_g1_i2_1235	C/T	TRINITY_DN1988_c1_g1_i2	1235	NA	NA	+	TRINITY_DN1988_c1_g1_i2	NA	NA	NA	CC	CC	CT	CT	CC	CC
	UTRINITY_DN1988_c1_g1_i2_1311	A/G	TRINITY_DN1988_c1_g1_i2	1311	NA	NA	+	TRINITY_DN1988_c1_g1_i2	NA	NA	NA	AA	AA	AG	AG	AA	AA
	UTRINITY_DN12015_c0_g1_i1_401	G/A	TRINITY_DN12015_c0_g1_i1	401	NA	NA	+	TRINITY_DN12015_c0_g1_i1	NA	NA	NA	GG	GG	GG	GG	AA	AA
	UTRINITY_DN12811_c1_g1_i1_397	A/C	TRINITY_DN12811_c1_g1_i1	397	NA	NA	+	TRINITY_DN12811_c1_g1_i1	NA	NA	NA	AA	AA	AA	AA	CC	CC
	UTRINITY_DN26276_c0_g1_i5_415	A/C	TRINITY_DN26276_c0_g1_i5	415	NA	NA	+	TRINITY_DN26276_c0_g1_i5	NA	NA	NA	AA	AA	AA	AA	CC	CC
	UTRINITY_DN9115_c0_g1_i3_463	G/C	TRINITY_DN9115_c0_g1_i3	463	NA	NA	+	TRINITY_DN9115_c0_g1_i3	NA	NA	NA	CC	CC	GG	GG	GG	GG
	UTRINITY_DN199_c0_g1_i1_250	C/G	TRINITY_DN199_c0_g1_i1	250	NA	NA	+	TRINITY_DN199_c0_g1_i1	NA	NA	NA	CC	CC	CC	CC	CG	CG
	UTRINITY_DN199_c0_g1_i1_316	G/A	TRINITY_DN199_c0_g1_i1	316	NA	NA	+	TRINITY_DN199_c0_g1_i1	NA	NA	NA	GG	GG	GA	GA	GA	GA
	UTRINITY_DN199_c0_g1_i1_384	G/C	TRINITY_DN199_c0_g1_i1	384	NA	NA	+	TRINITY_DN199_c0_g1_i1	NA	NA	NA	GG	GG	GG	GG	GC	GC
	UTRINITY_DN2931_c0_g2_i6_3387	G/C	TRINITY_DN2931_c0_g2_i6	3387	NA	NA	+	TRINITY_DN2931_c0_g2_i6	NA	NA	NA	GG	GG	CC	CC	GG	GG
	UTRINITY_DN43449_c0_g1_i3_206	C/T	TRINITY_DN43449_c0_g1_i3	206	NA	NA	+	TRINITY_DN43449_c0_g1_i3	NA	NA	NA	CC	CC	TT	TT	CC	CC
	UTRINITY_DN4981_c0_g1_i6_589	G/A	TRINITY_DN4981_c0_g1_i6	589	NA	NA	+	TRINITY_DN4981_c0_g1_i6	NA	NA	NA	GG	GG	GG	GG	AA	AA
	UTRINITY_DN854_c0_g1_i11_991	A/C	TRINITY_DN854_c0_g1_i11	991	NA	NA	+	TRINITY_DN854_c0_g1_i11	NA	NA	NA	AA	AA	AA	AA	CC	CC
	UTRINITY_DN6397_c0_g1_i4_2118	G/T	TRINITY_DN6397_c0_g1_i4	2118	NA	NA	+	TRINITY_DN6397_c0_g1_i4	NA	NA	NA	GG	GG	GT	GT	GT	GT
	UTRINITY_DN6397_c0_g1_i4_2125	T/C	TRINITY_DN6397_c0_g1_i4	2125	NA	NA	+	TRINITY_DN6397_c0_g1_i4	NA	NA	NA	TT	TT	TC	TC	TC	TC
	UTRINITY_DN6397_c0_g1_i4_2158	A/G	TRINITY_DN6397_c0_g1_i4	2158	NA	NA	+	TRINITY_DN6397_c0_g1_i4	NA	NA	NA	AA	AA	AG	AG	AG	AG
	UTRINITY_DN8153_c0_g1_i4_5171	C/T	TRINITY_DN8153_c0_g1_i4	5171	NA	NA	+	TRINITY_DN8153_c0_g1_i4	NA	NA	NA	CT	CT	CC	CC	CC	CC
	UTRINITY_DN10799_c0_g2_i1_157	A/G	TRINITY_DN10799_c0_g2_i1	157	NA	NA	+	TRINITY_DN10799_c0_g2_i1	NA	NA	NA	AA	AA	GG	GG	AA	AA
	UTRINITY_DN10799_c0_g2_i1_174	C/A	TRINITY_DN10799_c0_g2_i1	174	NA	NA	+	TRINITY_DN10799_c0_g2_i1	NA	NA	NA	CC	CC	AA	AA	CC	CC
	UTRINITY_DN56_c0_g1_i4_156	C/G	TRINITY_DN56_c0_g1_i4	156	NA	NA	+	TRINITY_DN56_c0_g1_i4	NA	NA	NA	CC	CC	CG	CG	CG	CG
	UTRINITY_DN7068_c0_g1_i9_490	C/T	TRINITY_DN7068_c0_g1_i9	490	NA	NA	+	TRINITY_DN7068_c0_g1_i9	NA	NA	NA	CC	CC	TT	TT	CC	CC
	UTRINITY_DN8012_c0_g1_i1_1375	C/T	TRINITY_DN8012_c0_g1_i1	1375	NA	NA	+	TRINITY_DN8012_c0_g1_i1	NA	NA	NA	CC	CC	CC	CC	TT	TT
	UTRINITY_DN8012_c0_g1_i1_1533	A/G	TRINITY_DN8012_c0_g1_i1	1533	NA	NA	+	TRINITY_DN8012_c0_g1_i1	NA	NA	NA	GG	GG	AA	AA	AA	AA
	UTRINITY_DN2401_c0_g1_i6_3000	T/C	TRINITY_DN2401_c0_g1_i6	3000	NA	NA	+	TRINITY_DN2401_c0_g1_i6	NA	NA	NA	TT	TT	TT	TT	CC	CC
	UTRINITY_DN3849_c0_g1_i12_1168	T/C	TRINITY_DN3849_c0_g1_i12	1168	NA	NA	+	TRINITY_DN3849_c0_g1_i12	NA	NA	NA	TT	TT	TT	TT	CC	CC
	UTRINITY_DN13063_c0_g1_i6_1472	G/A	TRINITY_DN13063_c0_g1_i6	1472	NA	NA	+	TRINITY_DN13063_c0_g1_i6	NA	NA	NA	GG	GG	GG	GG	AA	AA
	UTRINITY_DN42125_c1_g1_i4_135	G/A	TRINITY_DN42125_c1_g1_i4	135	NA	NA	+	TRINITY_DN42125_c1_g1_i4	NA	NA	NA	GG	GG	GG	GG	AA	AA
	UTRINITY_DN42125_c1_g1_i4_247	C/G	TRINITY_DN42125_c1_g1_i4	247	NA	NA	+	TRINITY_DN42125_c1_g1_i4	NA	NA	NA	CC	CC	CC	CC	GG	GG
	UTRINITY_DN4657_c0_g1_i2_231	C/T	TRINITY_DN4657_c0_g1_i2	231	NA	NA	+	TRINITY_DN4657_c0_g1_i2	NA	NA	NA	CC	CC	CC	CC	TT	TT
	UTRINITY_DN4657_c0_g1_i2_2329	T/C	TRINITY_DN4657_c0_g1_i2	2329	NA	NA	+	TRINITY_DN4657_c0_g1_i2	NA	NA	NA	TT	TT	TC	TC	TC	TC
	UTRINITY_DN743_c0_g1_i4_285	C/T	TRINITY_DN743_c0_g1_i4	285	NA	NA	+	TRINITY_DN743_c0_g1_i4	NA	NA	NA	CC	CC	CC	CC	TT	TT
	UTRINITY_DN743_c0_g1_i4_319	G/T	TRINITY_DN743_c0_g1_i4	319	NA	NA	+	TRINITY_DN743_c0_g1_i4	NA	NA	NA	GG	GG	GG	GG	TT	TT
	UTRINITY_DN44637_c0_g1_i2_662	A/G	TRINITY_DN44637_c0_g1_i2	662	NA	NA	+	TRINITY_DN44637_c0_g1_i2	NA	NA	NA	AA	AA	AA	AA	AG	AG
	UTRINITY_DN32596_c0_g1_i2_110	G/A	TRINITY_DN32596_c0_g1_i2	110	NA	NA	+	TRINITY_DN32596_c0_g1_i2	NA	NA	NA	GG	GG	GG	GG	AA	AA
	UTRINITY_DN32596_c0_g1_i2_255	A/K	TRINITY_DN32596_c0_g1_i2	255	NA	NA	+	TRINITY_DN32596_c0_g1_i2	NA	NA	NA	AT	AT	AA	AA	GG	GG
	UTRINITY_DN4978_c1_g1_i4_86	T/C	TRINITY_DN4978_c1_g1_i4	86	NA	NA	+	TRINITY_DN4978_c1_g1_i4	NA	NA	NA	TT	TT	TT	TT	CC	CC
	UTRINITY_DN4978_c1_g1_i4_92	C/G	TRINITY_DN4978_c1_g1_i4	92	NA	NA	+	TRINITY_DN4978_c1_g1_i4	NA	NA	NA	CC	CC	CC	CC	GG	GG
	UTRINITY_DN3066_c0_g1_i7_221	C/T	TRINITY_DN3066_c0_g1_i7	221	NA	NA	+	TRINITY_DN3066_c0_g1_i7	NA	NA	NA	TC	TC	TC	TC	CC	CC
	UTRINITY_DN3066_c0_g1_i7_266	A/G	TRINITY_DN3066_c0_g1_i7	266	NA	NA	+	TRINITY_DN3066_c0_g1_i7	NA	NA	NA	GA	GA	GA	GA	AA	AA
	UTRINITY_DN3273_c1_g1_i3_940	T/C	TRINITY_DN3273_c1_g1_i3	940	NA	NA	+	TRINITY_DN3273_c1_g1_i3	NA	NA	NA	TT	TT	TT	TT	CC	CC
	UTRINITY_DN307_c0_g1_i4_2002	G/T	TRINITY_DN307_c0_g1_i4	2002	NA	NA	+	TRINITY_DN307_c0_g1_i4	NA	NA	NA	GG	GG	TT	TT	GG	GG
	UTRINITY_DN10048_c0_g1_i3_3740	A/G	TRINITY_DN10048_c0_g1_i3	3740	NA	NA	+	TRINITY_DN10048_c0_g1_i3	NA	NA	NA	AA	AA	GG	GG	AA	AA
	UTRINITY_DN10048_c0_g1_i3_3753	A/G	TRINITY_DN10048_c0_g1_i3	3753	NA	NA	+	TRINITY_DN10048_c0_g1_i3	NA	NA	NA	AA	AA	GG	GG	AA	AA
	UTRINITY_DN2033_c0_g1_i1_2409	A/G	TRINITY_DN2033_c0_g1_i1	2409	NA	NA	+	TRINITY_DN2033_c0_g1_i1	NA	NA	NA	AA	AA	AA	AA	GG	GG
	UTRINITY_DN4948_c0_g1_i7_1037	G/A	TRINITY_DN4948_c0_g1_i7	1037	NA	NA	+	TRINITY_DN4948_c0_g1_i7	NA	NA	NA	GA	GA	GG	GG	GG	GG
	UTRINITY_DN4948_c0_g1_i7_1049	T/C	TRINITY_DN4948_c0_g1_i7	1049	NA	NA	+	TRINITY_DN4948_c0_g1_i7	NA	NA	NA	TC	TC	TT	TT	TT	TT
	UTRINITY_DN3326_c0_g3_i1_1279	T/A	TRINITY_DN3326_c0_g3_i1	1279	NA	NA	+	TRINITY_DN3326_c0_g3_i1	NA	NA	NA	TT	TT	TA	TA	TA	TA
	UTRINITY_DN3326_c0_g3_i1_1286	C/T	TRINITY_DN3326_c0_g3_i1	1286	NA	NA	+	TRINITY_DN3326_c0_g3_i1	NA	NA	NA	CC	CC	CT	CT	CT	CT
	UTRINITY_DN6392_c0_g1_i6_435	G/A	TRINITY_DN6392_c0_g1_i6	435	NA	NA	+	TRINITY_DN6392_c0_g1_i6	NA	NA	NA	GG	GG	GG	GG	AA	AA
	UTRINITY_DN6392_c0_g1_i6_585	G/A	TRINITY_DN6392_c0_g1_i6	585	NA	NA	+	TRINITY_DN6392_c0_g1_i6	NA	NA	NA	GG	GG	GG	GG	AA	AA
	UTRINITY_DN6392_c0_g1_i6_600	T/C	TRINITY_DN6392_c0_g1_i6	600	NA	NA	+	TRINITY_DN6392_c0_g1_i6	NA	NA	NA	TT	TT	TT	TT	CC	CC
	UTRINITY_DN6392_c0_g1_i6_696	C/T	TRINITY_DN6392_c0_g1_i6	696	NA	NA	+	TRINITY_DN6392_c0_g1_i6	NA	NA	NA	CC	CC	CC	CC	TT	TT
	UTRINITY_DN6392_c0_g1_i6_763	T/G	TRINITY_DN6392_c0_g1_i6	763	NA	NA	+	TRINITY_DN6392_c0_g1_i6	NA	NA	NA	TT	TT	TT	TT	GG	GG
	UTRINITY_DN6392_c0_g1_i6_784	A/G	TRINITY_DN6392_c0_g1_i6	784	NA	NA	+	TRINITY_DN6392_c0_g1_i6	NA	NA	NA	AA	AA	AA	AA	GG	GG
	UTRINITY_DN6392_c0_g1_i6_806	A/G	TRINITY_DN6392_c0_g1_i6	806	NA	NA	+	TRINITY_DN6392_c0_g1_i6	NA	NA	NA	AA	AA	AA	AA	GG	GG
	UTRINITY_DN6392_c0_g1_i6_826	T/C	TRINITY_DN6392_c0_g1_i6	826	NA	NA	+	TRINITY_DN6392_c0_g1_i6	NA	NA	NA	TT	TT	TT	TT	CC	CC
	UTRINITY_DN6392_c0_g1_i6_868	T/G	TRINITY_DN6392_c0_g1_i6	868	NA	NA	+	TRINITY_DN6392_c0_g1_i6	NA	NA	NA	TT	TT	TT	TT	GG	GG
	UTRINITY_DN6392_c0_g1_i6_871	G/A	TRINITY_DN6392_c0_g1_i6	871	NA	NA	+	TRINITY_DN6392_c0_g1_i6	NA	NA	NA	GG	GG	GG	GG	AA	AA
	UTRINITY_DN6392_c0_g1_i6_874	G/A	TRINITY_DN6392_c0_g1_i6	874	NA	NA	+	TRINITY_DN6392_c0_g1_i6	NA	NA	NA	GG	GG	GG	GG	AA	AA
	UTRINITY_DN6392_c0_g1_i6_892	A/C	TRINITY_DN6392_c0_g1_i6	892	NA	NA	+	TRINITY_DN6392_c0_g1_i6	NA	NA	NA	AA	AA	AA	AA	CC	CC
	UTRINITY_DN6392_c0_g1_i6_898	A/G	TRINITY_DN6392_c0_g1_i6	898	NA	NA	+	TRINITY_DN6392_c0_g1_i6	NA	NA	NA	AA	AA	AA	AA	GG	GG
	UTRINITY_DN383_c0_g2_i1_784	T/G	TRINITY_DN383_c0_g2_i1	784	NA	NA	+	TRINITY_DN383_c0_g2_i1	NA	NA	NA	TT	TT	TG	TG	TT	TT
	UTRINITY_DN383_c0_g2_i1_787	A/G	TRINITY_DN383_c0_g2_i1	787	NA	NA	+	TRINITY_DN383_c0_g2_i1	NA	NA	NA	AA	AA	AG	AG	AA	AA
	UTRINITY_DN383_c0_g2_i1_792	T/C	TRINITY_DN383_c0_g2_i1	792	NA	NA	+	TRINITY_DN383_c0_g2_i1	NA	NA	NA	TT	TT	TC	TC	TT	TT
	UTRINITY_DN383_c0_g2_i1_802	C/T	TRINITY_DN383_c0_g2_i1	802	NA	NA	+	TRINITY_DN383_c0_g2_i1	NA	NA	NA	CC	CC	CT	CT	CC	CC
	UTRINITY_DN4370_c0_g1_i8_1377	A/G	TRINITY_DN4370_c0_g1_i8	1377	NA	NA	+	TRINITY_DN4370_c0_g1_i8	NA	NA	NA	AA	AA	AA	AA	GG	GG
	UTRINITY_DN8356_c1_g1_i3_140	T/C	TRINITY_DN8356_c1_g1_i3	140	NA	NA	+	TRINITY_DN8356_c1_g1_i3	NA	NA	NA	TT	TT	TT	TT	CC	CC
	UTRINITY_DN8356_c1_g1_i3_320	C/A	TRINITY_DN8356_c1_g1_i3	320	NA	NA	+	TRINITY_DN8356_c1_g1_i3	NA	NA	NA	CC	CC	CC	CC	AA	AA
	UTRINITY_DN8356_c1_g1_i3_744	A/G	TRINITY_DN8356_c1_g1_i3	744	NA	NA	+	TRINITY_DN8356_c1_g1_i3	NA	NA	NA	AA	AA	GG	GG	AA	AA
	UTRINITY_DN8356_c1_g1_i3_758	A/T	TRINITY_DN8356_c1_g1_i3	758	NA	NA	+	TRINITY_DN8356_c1_g1_i3	NA	NA	NA	AA	AA	TT	TT	AA	AA
	UTRINITY_DN16986_c0_g1_i4_755	T/C	TRINITY_DN16986_c0_g1_i4	755	NA	NA	+	TRINITY_DN16986_c0_g1_i4	NA	NA	NA	TT	TT	CC	CC	TT	TT
	UTRINITY_DN12678_c0_g1_i1_137	T/A	TRINITY_DN12678_c0_g1_i1	137	NA	NA	+	TRINITY_DN12678_c0_g1_i1	NA	NA	NA	TT	TT	TT	TT	AA	AA
	UTRINITY_DN12678_c0_g1_i1_193	C/T	TRINITY_DN12678_c0_g1_i1	193	NA	NA	+	TRINITY_DN12678_c0_g1_i1	NA	NA	NA	CC	CC	CC	CC	TT	TT
	UTRINITY_DN6489_c0_g1_i2_1202	G/A	TRINITY_DN6489_c0_g1_i2	1202	NA	NA	+	TRINITY_DN6489_c0_g1_i2	NA	NA	NA	GG	GG	GG	GG	AA	AA
	UTRINITY_DN6489_c0_g1_i2_1208	T/C	TRINITY_DN6489_c0_g1_i2	1208	NA	NA	+	TRINITY_DN6489_c0_g1_i2	NA	NA	NA	TT	TT	TT	TT	CC	CC
	UTRINITY_DN437_c0_g1_i18_1214	G/C	TRINITY_DN437_c0_g1_i18	1214	NA	NA	+	TRINITY_DN437_c0_g1_i18	NA	NA	NA	CC	CC	GG	GG	GG	GG
	UTRINITY_DN4304_c0_g1_i6_820	G/A	TRINITY_DN4304_c0_g1_i6	820	NA	NA	+	TRINITY_DN4304_c0_g1_i6	NA	NA	NA	GG	GG	GG	GG	GA	GA
	UTRINITY_DN5241_c0_g1_i6_1471	T/G	TRINITY_DN5241_c0_g1_i6	1471	NA	NA	+	TRINITY_DN5241_c0_g1_i6	NA	NA	NA	TT	TT	TT	TT	TG	TG
	UTRINITY_DN5241_c0_g1_i6_1627	C/T	TRINITY_DN5241_c0_g1_i6	1627	NA	NA	+	TRINITY_DN5241_c0_g1_i6	NA	NA	NA	CC	CC	CC	CC	CT	CT
	UTRINITY_DN5241_c0_g1_i6_1672	C/T	TRINITY_DN5241_c0_g1_i6	1672	NA	NA	+	TRINITY_DN5241_c0_g1_i6	NA	NA	NA	CC	CC	CC	CC	TC	TC
	UTRINITY_DN5241_c0_g1_i6_2206	T/C	TRINITY_DN5241_c0_g1_i6	2206	NA	NA	+	TRINITY_DN5241_c0_g1_i6	NA	NA	NA	TT	TT	TT	TT	TC	TC
	UTRINITY_DN5241_c0_g1_i6_2215	C/T	TRINITY_DN5241_c0_g1_i6	2215	NA	NA	+	TRINITY_DN5241_c0_g1_i6	NA	NA	NA	CC	CC	CT	CT	CC	CC
	UTRINITY_DN5241_c0_g1_i6_2251	T/C	TRINITY_DN5241_c0_g1_i6	2251	NA	NA	+	TRINITY_DN5241_c0_g1_i6	NA	NA	NA	TT	TT	TT	TT	TC	TC
	UTRINITY_DN17026_c0_g2_i1_1039	A/G	TRINITY_DN17026_c0_g2_i1	1039	NA	NA	+	TRINITY_DN17026_c0_g2_i1	NA	NA	NA	AA	AA	AA	AA	GG	GG
	UTRINITY_DN17026_c0_g2_i1_1154	T/C	TRINITY_DN17026_c0_g2_i1	1154	NA	NA	+	TRINITY_DN17026_c0_g2_i1	NA	NA	NA	TT	TT	TT	TT	CC	CC
	UTRINITY_DN9192_c0_g1_i1_1114	A/G	TRINITY_DN9192_c0_g1_i1	1114	NA	NA	+	TRINITY_DN9192_c0_g1_i1	NA	NA	NA	AA	AA	AA	AA	GG	GG
	UTRINITY_DN9192_c0_g1_i1_1306	T/A	TRINITY_DN9192_c0_g1_i1	1306	NA	NA	+	TRINITY_DN9192_c0_g1_i1	NA	NA	NA	TA	TA	TA	TA	TT	TT
	UTRINITY_DN9192_c0_g1_i1_1310	T/G	TRINITY_DN9192_c0_g1_i1	1310	NA	NA	+	TRINITY_DN9192_c0_g1_i1	NA	NA	NA	TG	TG	TG	TG	TT	TT
	UTRINITY_DN9192_c0_g1_i1_1346	A/T	TRINITY_DN9192_c0_g1_i1	1346	NA	NA	+	TRINITY_DN9192_c0_g1_i1	NA	NA	NA	AT	AT	AA	AA	AT	AT
	UTRINITY_DN9192_c0_g1_i1_1357	T/C	TRINITY_DN9192_c0_g1_i1	1357	NA	NA	+	TRINITY_DN9192_c0_g1_i1	NA	NA	NA	TT	TT	TT	TT	TC	TC
	UTRINITY_DN9192_c0_g1_i1_1398	T/C	TRINITY_DN9192_c0_g1_i1	1398	NA	NA	+	TRINITY_DN9192_c0_g1_i1	NA	NA	NA	CT	CT	CT	CT	TT	TT
	UTRINITY_DN9192_c0_g1_i1_1416	G/A	TRINITY_DN9192_c0_g1_i1	1416	NA	NA	+	TRINITY_DN9192_c0_g1_i1	NA	NA	NA	AG	AG	AG	AG	GG	GG
	UTRINITY_DN9192_c0_g1_i1_1462	A/G	TRINITY_DN9192_c0_g1_i1	1462	NA	NA	+	TRINITY_DN9192_c0_g1_i1	NA	NA	NA	AA	AA	AA	AA	AG	AG
	UTRINITY_DN371_c0_g1_i2_1274	A/T	TRINITY_DN371_c0_g1_i2	1274	NA	NA	+	TRINITY_DN371_c0_g1_i2	NA	NA	NA	TT	TT	AA	AA	AA	AA
	UTRINITY_DN25530_c1_g1_i2_162	T/C	TRINITY_DN25530_c1_g1_i2	162	NA	NA	+	TRINITY_DN25530_c1_g1_i2	NA	NA	NA	TT	TT	TT	TT	CC	CC
	UTRINITY_DN32425_c0_g1_i2_612	C/A	TRINITY_DN32425_c0_g1_i2	612	NA	NA	+	TRINITY_DN32425_c0_g1_i2	NA	NA	NA	CC	CC	CC	CC	CA	CA
	UTRINITY_DN2599_c1_g1_i4_764	G/C	TRINITY_DN2599_c1_g1_i4	764	NA	NA	+	TRINITY_DN2599_c1_g1_i4	NA	NA	NA	GG	GG	GG	GG	CC	CC
	UTRINITY_DN2599_c1_g1_i4_766	A/T	TRINITY_DN2599_c1_g1_i4	766	NA	NA	+	TRINITY_DN2599_c1_g1_i4	NA	NA	NA	AA	AA	AA	AA	TT	TT
	UTRINITY_DN80018_c1_g1_i1_224	C/A	TRINITY_DN80018_c1_g1_i1	224	NA	NA	+	TRINITY_DN80018_c1_g1_i1	NA	NA	NA	CC	CC	CC	CC	AA	AA
	UTRINITY_DN14781_c1_g1_i1_83	T/A	TRINITY_DN14781_c1_g1_i1	83	NA	NA	+	TRINITY_DN14781_c1_g1_i1	NA	NA	NA	TT	TT	TT	TT	AA	AA
	UTRINITY_DN8586_c0_g1_i1_378	A/C	TRINITY_DN8586_c0_g1_i1	378	NA	NA	+	TRINITY_DN8586_c0_g1_i1	NA	NA	NA	AA	AA	AA	AA	AC	AC
	UTRINITY_DN8586_c0_g1_i1_437	A/G	TRINITY_DN8586_c0_g1_i1	437	NA	NA	+	TRINITY_DN8586_c0_g1_i1	NA	NA	NA	AA	AA	AA	AA	GA	GA
	UTRINITY_DN8586_c0_g1_i1_480	C/T	TRINITY_DN8586_c0_g1_i1	480	NA	NA	+	TRINITY_DN8586_c0_g1_i1	NA	NA	NA	CC	CC	CC	CC	CT	CT
	UTRINITY_DN8586_c0_g1_i1_492	A/C	TRINITY_DN8586_c0_g1_i1	492	NA	NA	+	TRINITY_DN8586_c0_g1_i1	NA	NA	NA	AA	AA	AA	AA	AC	AC
	UTRINITY_DN8586_c0_g1_i1_534	A/C	TRINITY_DN8586_c0_g1_i1	534	NA	NA	+	TRINITY_DN8586_c0_g1_i1	NA	NA	NA	AA	AA	AA	AA	AC	AC
	UTRINITY_DN3341_c0_g1_i8_494	A/G	TRINITY_DN3341_c0_g1_i8	494	NA	NA	+	TRINITY_DN3341_c0_g1_i8	NA	NA	NA	AA	AA	AA	AA	GG	GG
	UTRINITY_DN5786_c0_g1_i1_279	C/G	TRINITY_DN5786_c0_g1_i1	279	NA	NA	+	TRINITY_DN5786_c0_g1_i1	NA	NA	NA	CC	CC	GG	GG	CC	CC
	UTRINITY_DN1000_c0_g1_i3_1225	T/C	TRINITY_DN1000_c0_g1_i3	1225	NA	NA	+	TRINITY_DN1000_c0_g1_i3	NA	NA	NA	TT	TT	CC	CC	TT	TT
	UTRINITY_DN1000_c0_g1_i3_1234	T/C	TRINITY_DN1000_c0_g1_i3	1234	NA	NA	+	TRINITY_DN1000_c0_g1_i3	NA	NA	NA	TT	TT	CC	CC	TT	TT
	UTRINITY_DN4996_c0_g1_i3_1263	G/T	TRINITY_DN4996_c0_g1_i3	1263	NA	NA	+	TRINITY_DN4996_c0_g1_i3	NA	NA	NA	GG	GG	GT	GT	GT	GT
	UTRINITY_DN4996_c0_g1_i3_1499	T/A	TRINITY_DN4996_c0_g1_i3	1499	NA	NA	+	TRINITY_DN4996_c0_g1_i3	NA	NA	NA	TT	TT	TT	TT	TA	TA
	UTRINITY_DN738_c0_g1_i5_985	C/A	TRINITY_DN738_c0_g1_i5	985	NA	NA	+	TRINITY_DN738_c0_g1_i5	NA	NA	NA	CC	CC	CC	CC	AA	AA
	UTRINITY_DN9875_c0_g1_i11_3370	T/C	TRINITY_DN9875_c0_g1_i11	3370	NA	NA	+	TRINITY_DN9875_c0_g1_i11	NA	NA	NA	TC	TC	TC	TC	TT	TT
	UTRINITY_DN9875_c0_g1_i11_4274	C/T	TRINITY_DN9875_c0_g1_i11	4274	NA	NA	+	TRINITY_DN9875_c0_g1_i11	NA	NA	NA	CC	CC	CT	CT	CC	CC
	UTRINITY_DN11890_c0_g1_i10_547	A/G	TRINITY_DN11890_c0_g1_i10	547	NA	NA	+	TRINITY_DN11890_c0_g1_i10	NA	NA	NA	GG	GG	AA	AA	AA	AA
	UTRINITY_DN11890_c0_g1_i10_549	C/G	TRINITY_DN11890_c0_g1_i10	549	NA	NA	+	TRINITY_DN11890_c0_g1_i10	NA	NA	NA	CC	CC	GG	GG	CC	CC
	UTRINITY_DN26520_c0_g3_i1_576	C/T	TRINITY_DN26520_c0_g3_i1	576	NA	NA	+	TRINITY_DN26520_c0_g3_i1	NA	NA	NA	CC	CC	CC	CC	CT	CT
	UTRINITY_DN26520_c0_g3_i1_577	G/T	TRINITY_DN26520_c0_g3_i1	577	NA	NA	+	TRINITY_DN26520_c0_g3_i1	NA	NA	NA	GG	GG	GG	GG	GT	GT
	UTRINITY_DN2702_c0_g2_i6_581	T/C	TRINITY_DN2702_c0_g2_i6	581	NA	NA	+	TRINITY_DN2702_c0_g2_i6	NA	NA	NA	TC	TC	TT	TT	TT	TT
	UTRINITY_DN1124_c0_g1_i7_651	G/C	TRINITY_DN1124_c0_g1_i7	651	NA	NA	+	TRINITY_DN1124_c0_g1_i7	NA	NA	NA	GG	GG	CC	CC	GG	GG
	UTRINITY_DN20882_c0_g1_i2_290	T/C	TRINITY_DN20882_c0_g1_i2	290	NA	NA	+	TRINITY_DN20882_c0_g1_i2	NA	NA	NA	TT	TT	CC	CC	CT	CT
	UTRINITY_DN630_c0_g1_i4_225	A/C	TRINITY_DN630_c0_g1_i4	225	NA	NA	+	TRINITY_DN630_c0_g1_i4	NA	NA	NA	AA	AA	CC	CC	AA	AA
	UTRINITY_DN268_c0_g1_i5_917	G/A	TRINITY_DN268_c0_g1_i5	917	NA	NA	+	TRINITY_DN268_c0_g1_i5	NA	NA	NA	GG	GG	GG	GG	AA	AA
	UTRINITY_DN731_c0_g1_i1_342	C/T	TRINITY_DN731_c0_g1_i1	342	NA	NA	+	TRINITY_DN731_c0_g1_i1	NA	NA	NA	CC	CC	CC	CC	TT	TT
	UTRINITY_DN7972_c0_g1_i3_458	A/G	TRINITY_DN7972_c0_g1_i3	458	NA	NA	+	TRINITY_DN7972_c0_g1_i3	NA	NA	NA	AA	AA	AA	AA	GG	GG
	UTRINITY_DN7972_c0_g1_i3_563	C/G	TRINITY_DN7972_c0_g1_i3	563	NA	NA	+	TRINITY_DN7972_c0_g1_i3	NA	NA	NA	CC	CC	CC	CC	GG	GG
	UTRINITY_DN7972_c0_g1_i3_646	C/T	TRINITY_DN7972_c0_g1_i3	646	NA	NA	+	TRINITY_DN7972_c0_g1_i3	NA	NA	NA	CC	CC	CC	CC	TT	TT
	UTRINITY_DN1366_c0_g1_i9_653	G/T	TRINITY_DN1366_c0_g1_i9	653	NA	NA	+	TRINITY_DN1366_c0_g1_i9	NA	NA	NA	GG	GG	GT	GT	GT	GT
	UTRINITY_DN1366_c0_g1_i9_709	T/A	TRINITY_DN1366_c0_g1_i9	709	NA	NA	+	TRINITY_DN1366_c0_g1_i9	NA	NA	NA	TT	TT	TA	TA	TA	TA
	UTRINITY_DN1366_c0_g1_i9_710	C/G	TRINITY_DN1366_c0_g1_i9	710	NA	NA	+	TRINITY_DN1366_c0_g1_i9	NA	NA	NA	CC	CC	CG	CG	CG	CG
	UTRINITY_DN1366_c0_g1_i9_719	A/G	TRINITY_DN1366_c0_g1_i9	719	NA	NA	+	TRINITY_DN1366_c0_g1_i9	NA	NA	NA	AA	AA	AG	AG	AG	AG
	UTRINITY_DN1366_c0_g1_i9_796	T/C	TRINITY_DN1366_c0_g1_i9	796	NA	NA	+	TRINITY_DN1366_c0_g1_i9	NA	NA	NA	TT	TT	TT	TT	CC	CC
	UTRINITY_DN5831_c0_g1_i3_1556	G/A	TRINITY_DN5831_c0_g1_i3	1556	NA	NA	+	TRINITY_DN5831_c0_g1_i3	NA	NA	NA	GG	GG	GG	GG	GA	GA
	UTRINITY_DN3078_c0_g1_i5_2512	G/A	TRINITY_DN3078_c0_g1_i5	2512	NA	NA	+	TRINITY_DN3078_c0_g1_i5	NA	NA	NA	GG	GG	AA	AA	GG	GG
	UTRINITY_DN3293_c0_g1_i4_520	A/G	TRINITY_DN3293_c0_g1_i4	520	NA	NA	+	TRINITY_DN3293_c0_g1_i4	NA	NA	NA	GG	GG	AA	AA	AA	AA
	UTRINITY_DN2337_c0_g1_i9_697	A/G	TRINITY_DN2337_c0_g1_i9	697	NA	NA	+	TRINITY_DN2337_c0_g1_i9	NA	NA	NA	AA	AA	GG	GG	AA	AA
	UTRINITY_DN3099_c0_g2_i6_1399	C/T	TRINITY_DN3099_c0_g2_i6	1399	NA	NA	+	TRINITY_DN3099_c0_g2_i6	NA	NA	NA	CC	CC	CT	CT	CC	CC
	UTRINITY_DN3099_c0_g2_i6_1405	C/G	TRINITY_DN3099_c0_g2_i6	1405	NA	NA	+	TRINITY_DN3099_c0_g2_i6	NA	NA	NA	CC	CC	CG	CG	CC	CC
	UTRINITY_DN8670_c0_g1_i4_547	T/G	TRINITY_DN8670_c0_g1_i4	547	NA	NA	+	TRINITY_DN8670_c0_g1_i4	NA	NA	NA	TT	TT	TT	TT	GG	GG
	UTRINITY_DN1269_c0_g1_i8_1035	T/C	TRINITY_DN1269_c0_g1_i8	1035	NA	NA	+	TRINITY_DN1269_c0_g1_i8	NA	NA	NA	TT	TT	TT	TT	CC	CC
	UTRINITY_DN1269_c0_g1_i8_1109	G/A	TRINITY_DN1269_c0_g1_i8	1109	NA	NA	+	TRINITY_DN1269_c0_g1_i8	NA	NA	NA	GG	GG	GG	GG	AA	AA
	UTRINITY_DN1269_c0_g1_i8_1160	T/G	TRINITY_DN1269_c0_g1_i8	1160	NA	NA	+	TRINITY_DN1269_c0_g1_i8	NA	NA	NA	TT	TT	TT	TT	GG	GG
	UTRINITY_DN1269_c0_g1_i8_1176	T/C	TRINITY_DN1269_c0_g1_i8	1176	NA	NA	+	TRINITY_DN1269_c0_g1_i8	NA	NA	NA	TT	TT	TT	TT	CC	CC
	UTRINITY_DN1269_c0_g1_i8_1204	C/T	TRINITY_DN1269_c0_g1_i8	1204	NA	NA	+	TRINITY_DN1269_c0_g1_i8	NA	NA	NA	CC	CC	CC	CC	TT	TT
	UTRINITY_DN1269_c0_g1_i8_1230	G/A	TRINITY_DN1269_c0_g1_i8	1230	NA	NA	+	TRINITY_DN1269_c0_g1_i8	NA	NA	NA	GG	GG	GG	GG	AA	AA
	UTRINITY_DN1269_c0_g1_i8_1243	G/T	TRINITY_DN1269_c0_g1_i8	1243	NA	NA	+	TRINITY_DN1269_c0_g1_i8	NA	NA	NA	GG	GG	GG	GG	TT	TT
	UTRINITY_DN1269_c0_g1_i8_1412	G/A	TRINITY_DN1269_c0_g1_i8	1412	NA	NA	+	TRINITY_DN1269_c0_g1_i8	NA	NA	NA	GG	GG	GG	GG	AA	AA
	UTRINITY_DN1269_c0_g1_i8_1420	G/A	TRINITY_DN1269_c0_g1_i8	1420	NA	NA	+	TRINITY_DN1269_c0_g1_i8	NA	NA	NA	GG	GG	GG	GG	AA	AA
	UTRINITY_DN604_c0_g2_i4_1747	C/T	TRINITY_DN604_c0_g2_i4	1747	NA	NA	+	TRINITY_DN604_c0_g2_i4	NA	NA	NA	CC	CC	CC	CC	TT	TT
	UTRINITY_DN604_c0_g2_i4_2012	T/G	TRINITY_DN604_c0_g2_i4	2012	NA	NA	+	TRINITY_DN604_c0_g2_i4	NA	NA	NA	TT	TT	TT	TT	GG	GG
	UTRINITY_DN604_c0_g2_i4_2018	C/T	TRINITY_DN604_c0_g2_i4	2018	NA	NA	+	TRINITY_DN604_c0_g2_i4	NA	NA	NA	CC	CC	CC	CC	TT	TT
	UTRINITY_DN604_c0_g2_i4_2033	C/T	TRINITY_DN604_c0_g2_i4	2033	NA	NA	+	TRINITY_DN604_c0_g2_i4	NA	NA	NA	CC	CC	CC	CC	TT	TT
	UTRINITY_DN7325_c1_g2_i1_681	C/G	TRINITY_DN7325_c1_g2_i1	681	NA	NA	+	TRINITY_DN7325_c1_g2_i1	NA	NA	NA	CC	CC	CC	CC	CG	CG
	UTRINITY_DN7325_c1_g2_i1_714	C/A	TRINITY_DN7325_c1_g2_i1	714	NA	NA	+	TRINITY_DN7325_c1_g2_i1	NA	NA	NA	CA	CA	CA	CA	CC	CC
	UTRINITY_DN7325_c1_g2_i1_720	T/C	TRINITY_DN7325_c1_g2_i1	720	NA	NA	+	TRINITY_DN7325_c1_g2_i1	NA	NA	NA	TC	TC	TC	TC	TT	TT
	UTRINITY_DN7325_c1_g2_i1_864	C/T	TRINITY_DN7325_c1_g2_i1	864	NA	NA	+	TRINITY_DN7325_c1_g2_i1	NA	NA	NA	CT	CT	CT	CT	CC	CC
	UTRINITY_DN7325_c1_g2_i1_939	C/T	TRINITY_DN7325_c1_g2_i1	939	NA	NA	+	TRINITY_DN7325_c1_g2_i1	NA	NA	NA	CC	CC	TC	TC	CC	CC
	UTRINITY_DN7325_c1_g2_i1_1058	C/T	TRINITY_DN7325_c1_g2_i1	1058	NA	NA	+	TRINITY_DN7325_c1_g2_i1	NA	NA	NA	TC	TC	TC	TC	CC	CC
	UTRINITY_DN1646_c0_g1_i10_270	G/A	TRINITY_DN1646_c0_g1_i10	270	NA	NA	+	TRINITY_DN1646_c0_g1_i10	NA	NA	NA	GG	GG	GG	GG	AA	AA
	UTRINITY_DN26429_c0_g2_i5_347	G/C	TRINITY_DN26429_c0_g2_i5	347	NA	NA	+	TRINITY_DN26429_c0_g2_i5	NA	NA	NA	GC	GC	GG	GG	GG	GG
	UTRINITY_DN22208_c0_g1_i1_361	G/T	TRINITY_DN22208_c0_g1_i1	361	NA	NA	+	TRINITY_DN22208_c0_g1_i1	NA	NA	NA	GG	GG	GT	GT	GG	GG
	UTRINITY_DN15602_c0_g1_i2_379	A/G	TRINITY_DN15602_c0_g1_i2	379	NA	NA	+	TRINITY_DN15602_c0_g1_i2	NA	NA	NA	AA	AA	AG	AG	AA	AA
	UTRINITY_DN15602_c0_g1_i2_384	G/A	TRINITY_DN15602_c0_g1_i2	384	NA	NA	+	TRINITY_DN15602_c0_g1_i2	NA	NA	NA	GG	GG	GA	GA	GG	GG
	UTRINITY_DN15602_c0_g1_i2_388	C/T	TRINITY_DN15602_c0_g1_i2	388	NA	NA	+	TRINITY_DN15602_c0_g1_i2	NA	NA	NA	CC	CC	CT	CT	CC	CC
	UTRINITY_DN15602_c0_g1_i2_398	A/G	TRINITY_DN15602_c0_g1_i2	398	NA	NA	+	TRINITY_DN15602_c0_g1_i2	NA	NA	NA	AA	AA	AG	AG	AA	AA
	UTRINITY_DN5023_c0_g1_i7_311	T/A	TRINITY_DN5023_c0_g1_i7	311	NA	NA	+	TRINITY_DN5023_c0_g1_i7	NA	NA	NA	TT	TT	AA	AA	TT	TT
	UTRINITY_DN1790_c1_g1_i4_516	G/T	TRINITY_DN1790_c1_g1_i4	516	NA	NA	+	TRINITY_DN1790_c1_g1_i4	NA	NA	NA	GG	GG	GG	GG	TT	TT
	UTRINITY_DN20996_c0_g1_i7_223	G/C	TRINITY_DN20996_c0_g1_i7	223	NA	NA	+	TRINITY_DN20996_c0_g1_i7	NA	NA	NA	GG	GG	GG	GG	CC	CC
	UTRINITY_DN132_c0_g1_i2_816	T/C	TRINITY_DN132_c0_g1_i2	816	NA	NA	+	TRINITY_DN132_c0_g1_i2	NA	NA	NA	TT	TT	TT	TT	TC	TC
	UTRINITY_DN132_c0_g1_i2_847	G/A	TRINITY_DN132_c0_g1_i2	847	NA	NA	+	TRINITY_DN132_c0_g1_i2	NA	NA	NA	GG	GG	GG	GG	GA	GA
	UTRINITY_DN132_c0_g1_i2_875	A/G	TRINITY_DN132_c0_g1_i2	875	NA	NA	+	TRINITY_DN132_c0_g1_i2	NA	NA	NA	AA	AA	AA	AA	AG	AG
	UTRINITY_DN132_c0_g1_i2_879	G/C	TRINITY_DN132_c0_g1_i2	879	NA	NA	+	TRINITY_DN132_c0_g1_i2	NA	NA	NA	GG	GG	GG	GG	GC	GC
	UTRINITY_DN132_c0_g1_i2_930	G/T	TRINITY_DN132_c0_g1_i2	930	NA	NA	+	TRINITY_DN132_c0_g1_i2	NA	NA	NA	GG	GG	GG	GG	GT	GT
	UTRINITY_DN11858_c0_g1_i11_482	A/C	TRINITY_DN11858_c0_g1_i11	482	NA	NA	+	TRINITY_DN11858_c0_g1_i11	NA	NA	NA	AA	AA	CC	CC	AA	AA
	UTRINITY_DN14201_c0_g1_i4_233	T/C	TRINITY_DN14201_c0_g1_i4	233	NA	NA	+	TRINITY_DN14201_c0_g1_i4	NA	NA	NA	TC	TC	TT	TT	TT	TT
	UTRINITY_DN8095_c0_g2_i1_128	G/A	TRINITY_DN8095_c0_g2_i1	128	NA	NA	+	TRINITY_DN8095_c0_g2_i1	NA	NA	NA	GG	GG	GG	GG	AA	AA
	UTRINITY_DN19233_c0_g1_i4_158	G/A	TRINITY_DN19233_c0_g1_i4	158	NA	NA	+	TRINITY_DN19233_c0_g1_i4	NA	NA	NA	GG	GG	GG	GG	AA	AA
	UTRINITY_DN10281_c0_g1_i5_909	G/A	TRINITY_DN10281_c0_g1_i5	909	NA	NA	+	TRINITY_DN10281_c0_g1_i5	NA	NA	NA	GG	GG	GG	GG	AA	AA
	UTRINITY_DN7765_c0_g1_i6_704	C/G	TRINITY_DN7765_c0_g1_i6	704	NA	NA	+	TRINITY_DN7765_c0_g1_i6	NA	NA	NA	CC	CC	GG	GG	CC	CC
	UTRINITY_DN35807_c1_g1_i1_120	T/C	TRINITY_DN35807_c1_g1_i1	120	NA	NA	+	TRINITY_DN35807_c1_g1_i1	NA	NA	NA	TT	TT	TC	TC	TT	TT
	UTRINITY_DN3013_c0_g1_i1_80	T/C	TRINITY_DN3013_c0_g1_i1	80	NA	NA	+	TRINITY_DN3013_c0_g1_i1	NA	NA	NA	TC	TC	TT	TT	TC	TC
	UTRINITY_DN6418_c2_g1_i1_80	G/A	TRINITY_DN6418_c2_g1_i1	80	NA	NA	+	TRINITY_DN6418_c2_g1_i1	NA	NA	NA	GA	GA	GA	GA	GG	GG
	UTRINITY_DN6418_c2_g1_i1_97	C/T	TRINITY_DN6418_c2_g1_i1	97	NA	NA	+	TRINITY_DN6418_c2_g1_i1	NA	NA	NA	CT	CT	CT	CT	CC	CC
	UTRINITY_DN13945_c0_g1_i3_1446	C/G	TRINITY_DN13945_c0_g1_i3	1446	NA	NA	+	TRINITY_DN13945_c0_g1_i3	NA	NA	NA	GG	GG	GC	GC	CC	CC
	UTRINITY_DN13945_c0_g1_i3_1523	T/C	TRINITY_DN13945_c0_g1_i3	1523	NA	NA	+	TRINITY_DN13945_c0_g1_i3	NA	NA	NA	CT	CT	CT	CT	TT	TT
	UTRINITY_DN13945_c0_g1_i3_1573	A/G	TRINITY_DN13945_c0_g1_i3	1573	NA	NA	+	TRINITY_DN13945_c0_g1_i3	NA	NA	NA	GA	GA	GA	GA	AA	AA
	UTRINITY_DN5231_c0_g2_i1_1403	G/T	TRINITY_DN5231_c0_g2_i1	1403	NA	NA	+	TRINITY_DN5231_c0_g2_i1	NA	NA	NA	GG	GG	TT	TT	GG	GG
	UTRINITY_DN9006_c0_g1_i8_175	G/A	TRINITY_DN9006_c0_g1_i8	175	NA	NA	+	TRINITY_DN9006_c0_g1_i8	NA	NA	NA	GG	GG	GG	GG	AA	AA
	UTRINITY_DN26416_c0_g2_i2_59	A/G	TRINITY_DN26416_c0_g2_i2	59	NA	NA	+	TRINITY_DN26416_c0_g2_i2	NA	NA	NA	AA	AA	GG	GG	AA	AA
	UTRINITY_DN5409_c1_g1_i8_1712	C/A	TRINITY_DN5409_c1_g1_i8	1712	NA	NA	+	TRINITY_DN5409_c1_g1_i8	NA	NA	NA	CC	CC	CC	CC	AA	AA
	UTRINITY_DN5409_c1_g1_i8_1730	A/G	TRINITY_DN5409_c1_g1_i8	1730	NA	NA	+	TRINITY_DN5409_c1_g1_i8	NA	NA	NA	AA	AA	AA	AA	GG	GG
	UTRINITY_DN10913_c0_g1_i1_1761	T/A	TRINITY_DN10913_c0_g1_i1	1761	NA	NA	+	TRINITY_DN10913_c0_g1_i1	NA	NA	NA	TT	TT	TT	TT	AA	AA
	UTRINITY_DN5541_c0_g1_i18_65	A/G	TRINITY_DN5541_c0_g1_i18	65	NA	NA	+	TRINITY_DN5541_c0_g1_i18	NA	NA	NA	AA	AA	AA	AA	AG	AG
	UTRINITY_DN38507_c0_g1_i1_366	T/C	TRINITY_DN38507_c0_g1_i1	366	NA	NA	+	TRINITY_DN38507_c0_g1_i1	NA	NA	NA	TT	TT	TT	TT	CC	CC
	UTRINITY_DN38507_c0_g1_i1_378	G/T	TRINITY_DN38507_c0_g1_i1	378	NA	NA	+	TRINITY_DN38507_c0_g1_i1	NA	NA	NA	GG	GG	GG	GG	TT	TT
	UTRINITY_DN38507_c0_g1_i1_381	T/G	TRINITY_DN38507_c0_g1_i1	381	NA	NA	+	TRINITY_DN38507_c0_g1_i1	NA	NA	NA	TT	TT	TT	TT	GG	GG
	UTRINITY_DN20682_c0_g1_i2_110	G/C	TRINITY_DN20682_c0_g1_i2	110	NA	NA	+	TRINITY_DN20682_c0_g1_i2	NA	NA	NA	GG	GG	GG	GG	CC	CC
	UTRINITY_DN20682_c0_g1_i2_219	A/S	TRINITY_DN20682_c0_g1_i2	219	NA	NA	+	TRINITY_DN20682_c0_g1_i2	NA	NA	NA	AA	AA	AA	AA	GC	GC
	UTRINITY_DN10626_c0_g1_i3_1284	A/T	TRINITY_DN10626_c0_g1_i3	1284	NA	NA	+	TRINITY_DN10626_c0_g1_i3	NA	NA	NA	AA	AA	AA	AA	TT	TT
	UTRINITY_DN14154_c0_g1_i2_760	G/A	TRINITY_DN14154_c0_g1_i2	760	NA	NA	+	TRINITY_DN14154_c0_g1_i2	NA	NA	NA	GG	GG	AA	AA	GG	GG
	UTRINITY_DN14154_c0_g1_i2_775	T/C	TRINITY_DN14154_c0_g1_i2	775	NA	NA	+	TRINITY_DN14154_c0_g1_i2	NA	NA	NA	TT	TT	CC	CC	TT	TT
	UTRINITY_DN14154_c0_g1_i2_781	A/C	TRINITY_DN14154_c0_g1_i2	781	NA	NA	+	TRINITY_DN14154_c0_g1_i2	NA	NA	NA	AA	AA	CC	CC	AA	AA
	UTRINITY_DN14154_c0_g1_i2_811	T/C	TRINITY_DN14154_c0_g1_i2	811	NA	NA	+	TRINITY_DN14154_c0_g1_i2	NA	NA	NA	TT	TT	CC	CC	TT	TT
	UTRINITY_DN11572_c0_g1_i7_879	T/C	TRINITY_DN11572_c0_g1_i7	879	NA	NA	+	TRINITY_DN11572_c0_g1_i7	NA	NA	NA	--	--	CC	CC	TT	TT
	UTRINITY_DN3939_c1_g2_i1_760	C/T	TRINITY_DN3939_c1_g2_i1	760	NA	NA	+	TRINITY_DN3939_c1_g2_i1	NA	NA	NA	CC	CC	CT	CT	CT	CT
	UTRINITY_DN3939_c1_g2_i1_1207	A/G	TRINITY_DN3939_c1_g2_i1	1207	NA	NA	+	TRINITY_DN3939_c1_g2_i1	NA	NA	NA	AA	AA	AG	AG	AA	AA
	UTRINITY_DN10050_c0_g1_i1_286	A/G	TRINITY_DN10050_c0_g1_i1	286	NA	NA	+	TRINITY_DN10050_c0_g1_i1	NA	NA	NA	AA	AA	AA	AA	GG	GG
	UTRINITY_DN10050_c0_g1_i1_289	G/T	TRINITY_DN10050_c0_g1_i1	289	NA	NA	+	TRINITY_DN10050_c0_g1_i1	NA	NA	NA	GG	GG	GG	GG	TT	TT
	UTRINITY_DN13300_c2_g2_i1_1527	A/C	TRINITY_DN13300_c2_g2_i1	1527	NA	NA	+	TRINITY_DN13300_c2_g2_i1	NA	NA	NA	AA	AA	AC	AC	AA	AA
	UTRINITY_DN16738_c1_g3_i1_558	T/C	TRINITY_DN16738_c1_g3_i1	558	NA	NA	+	TRINITY_DN16738_c1_g3_i1	NA	NA	NA	TC	TC	TT	TT	TT	TT
	UTRINITY_DN16738_c1_g3_i1_579	A/T	TRINITY_DN16738_c1_g3_i1	579	NA	NA	+	TRINITY_DN16738_c1_g3_i1	NA	NA	NA	AT	AT	AA	AA	AA	AA
	UTRINITY_DN16738_c1_g3_i1_582	A/C	TRINITY_DN16738_c1_g3_i1	582	NA	NA	+	TRINITY_DN16738_c1_g3_i1	NA	NA	NA	AC	AC	AA	AA	AA	AA
	UTRINITY_DN16738_c1_g3_i1_583	T/C	TRINITY_DN16738_c1_g3_i1	583	NA	NA	+	TRINITY_DN16738_c1_g3_i1	NA	NA	NA	TC	TC	TT	TT	TT	TT
	UTRINITY_DN16738_c1_g3_i1_609	A/T	TRINITY_DN16738_c1_g3_i1	609	NA	NA	+	TRINITY_DN16738_c1_g3_i1	NA	NA	NA	AT	AT	AA	AA	AA	AA
	UTRINITY_DN16738_c1_g3_i1_692	A/C	TRINITY_DN16738_c1_g3_i1	692	NA	NA	+	TRINITY_DN16738_c1_g3_i1	NA	NA	NA	AC	AC	AA	AA	AA	AA
	UTRINITY_DN16738_c1_g3_i1_713	T/A	TRINITY_DN16738_c1_g3_i1	713	NA	NA	+	TRINITY_DN16738_c1_g3_i1	NA	NA	NA	TA	TA	TT	TT	TT	TT
	UTRINITY_DN29884_c0_g2_i1_210	C/T	TRINITY_DN29884_c0_g2_i1	210	NA	NA	+	TRINITY_DN29884_c0_g2_i1	NA	NA	NA	CC	CC	CC	CC	TT	TT
	UTRINITY_DN3904_c0_g1_i1_874	C/T	TRINITY_DN3904_c0_g1_i1	874	NA	NA	+	TRINITY_DN3904_c0_g1_i1	NA	NA	NA	CC	CC	CC	CC	TT	TT
	UTRINITY_DN3904_c0_g1_i1_913	C/T	TRINITY_DN3904_c0_g1_i1	913	NA	NA	+	TRINITY_DN3904_c0_g1_i1	NA	NA	NA	CC	CC	TT	TT	CC	CC
	UTRINITY_DN26040_c0_g3_i1_195	A/G	TRINITY_DN26040_c0_g3_i1	195	NA	NA	+	TRINITY_DN26040_c0_g3_i1	NA	NA	NA	AG	AG	AG	AG	AA	AA
	UTRINITY_DN26257_c0_g1_i1_319	G/A	TRINITY_DN26257_c0_g1_i1	319	NA	NA	+	TRINITY_DN26257_c0_g1_i1	NA	NA	NA	GG	GG	GA	GA	GA	GA
	UTRINITY_DN26257_c0_g1_i1_502	C/T	TRINITY_DN26257_c0_g1_i1	502	NA	NA	+	TRINITY_DN26257_c0_g1_i1	NA	NA	NA	CC	CC	CT	CT	CT	CT
	UTRINITY_DN26257_c0_g1_i1_602	A/C	TRINITY_DN26257_c0_g1_i1	602	NA	NA	+	TRINITY_DN26257_c0_g1_i1	NA	NA	NA	AC	AC	AA	AA	AC	AC
	UTRINITY_DN7421_c0_g1_i6_756	C/T	TRINITY_DN7421_c0_g1_i6	756	NA	NA	+	TRINITY_DN7421_c0_g1_i6	NA	NA	NA	CC	CC	CT	CT	CC	CC
	UTRINITY_DN7421_c0_g1_i6_863	A/C	TRINITY_DN7421_c0_g1_i6	863	NA	NA	+	TRINITY_DN7421_c0_g1_i6	NA	NA	NA	AA	AA	AA	AA	AC	AC
	UTRINITY_DN7421_c0_g1_i6_1083	T/A	TRINITY_DN7421_c0_g1_i6	1083	NA	NA	+	TRINITY_DN7421_c0_g1_i6	NA	NA	NA	TT	TT	TT	TT	AA	AA
	UTRINITY_DN13381_c0_g1_i1_210	A/G	TRINITY_DN13381_c0_g1_i1	210	NA	NA	+	TRINITY_DN13381_c0_g1_i1	NA	NA	NA	AA	AA	AA	AA	GG	GG
	UTRINITY_DN41160_c0_g2_i3_80	G/A	TRINITY_DN41160_c0_g2_i3	80	NA	NA	+	TRINITY_DN41160_c0_g2_i3	NA	NA	NA	GG	GG	GA	GA	GG	GG
	UTRINITY_DN7055_c0_g1_i6_859	G/A	TRINITY_DN7055_c0_g1_i6	859	NA	NA	+	TRINITY_DN7055_c0_g1_i6	NA	NA	NA	GG	GG	AA	AA	GG	GG
	UTRINITY_DN4570_c0_g2_i2_1524	G/A	TRINITY_DN4570_c0_g2_i2	1524	NA	NA	+	TRINITY_DN4570_c0_g2_i2	NA	NA	NA	AA	AA	GG	GG	GG	GG
	UTRINITY_DN8076_c0_g2_i3_828	T/C	TRINITY_DN8076_c0_g2_i3	828	NA	NA	+	TRINITY_DN8076_c0_g2_i3	NA	NA	NA	TT	TT	TC	TC	TT	TT
	UTRINITY_DN23064_c0_g1_i1_122	T/C	TRINITY_DN23064_c0_g1_i1	122	NA	NA	+	TRINITY_DN23064_c0_g1_i1	NA	NA	NA	TT	TT	TT	TT	TC	TC
	UTRINITY_DN4520_c0_g1_i10_44	C/T	TRINITY_DN4520_c0_g1_i10	44	NA	NA	+	TRINITY_DN4520_c0_g1_i10	NA	NA	NA	CC	CC	CC	CC	TT	TT
	UTRINITY_DN4520_c0_g1_i10_104	T/C	TRINITY_DN4520_c0_g1_i10	104	NA	NA	+	TRINITY_DN4520_c0_g1_i10	NA	NA	NA	TT	TT	TT	TT	CC	CC
	UTRINITY_DN4520_c0_g1_i10_162	G/A	TRINITY_DN4520_c0_g1_i10	162	NA	NA	+	TRINITY_DN4520_c0_g1_i10	NA	NA	NA	GG	GG	GG	GG	AA	AA
	UTRINITY_DN4520_c0_g1_i10_175	C/A	TRINITY_DN4520_c0_g1_i10	175	NA	NA	+	TRINITY_DN4520_c0_g1_i10	NA	NA	NA	CC	CC	CC	CC	AA	AA
	UTRINITY_DN7911_c0_g1_i4_1109	G/A	TRINITY_DN7911_c0_g1_i4	1109	NA	NA	+	TRINITY_DN7911_c0_g1_i4	NA	NA	NA	GG	GG	GA	GA	GA	GA
	UTRINITY_DN7911_c0_g1_i4_1111	C/T	TRINITY_DN7911_c0_g1_i4	1111	NA	NA	+	TRINITY_DN7911_c0_g1_i4	NA	NA	NA	CC	CC	CC	CC	CT	CT
	UTRINITY_DN7911_c0_g1_i4_1121	C/T	TRINITY_DN7911_c0_g1_i4	1121	NA	NA	+	TRINITY_DN7911_c0_g1_i4	NA	NA	NA	CC	CC	CT	CT	CC	CC
	UTRINITY_DN4240_c0_g1_i3_384	T/C	TRINITY_DN4240_c0_g1_i3	384	NA	NA	+	TRINITY_DN4240_c0_g1_i3	NA	NA	NA	TT	TT	TT	TT	CC	CC
	UTRINITY_DN8846_c0_g1_i2_2227	A/G	TRINITY_DN8846_c0_g1_i2	2227	NA	NA	+	TRINITY_DN8846_c0_g1_i2	NA	NA	NA	AA	AA	AA	AA	GG	GG
	UTRINITY_DN8846_c0_g1_i2_2285	G/A	TRINITY_DN8846_c0_g1_i2	2285	NA	NA	+	TRINITY_DN8846_c0_g1_i2	NA	NA	NA	GG	GG	GG	GG	AA	AA
	UTRINITY_DN5304_c0_g1_i3_351	A/G	TRINITY_DN5304_c0_g1_i3	351	NA	NA	+	TRINITY_DN5304_c0_g1_i3	NA	NA	NA	AA	AA	GG	GG	AA	AA
	UTRINITY_DN5304_c0_g1_i3_581	A/T	TRINITY_DN5304_c0_g1_i3	581	NA	NA	+	TRINITY_DN5304_c0_g1_i3	NA	NA	NA	TT	TT	AA	AA	AA	AA
	UTRINITY_DN26489_c1_g1_i1_367	C/G	TRINITY_DN26489_c1_g1_i1	367	NA	NA	+	TRINITY_DN26489_c1_g1_i1	NA	NA	NA	CC	CC	CC	CC	GG	GG
	UTRINITY_DN26489_c1_g1_i1_420	G/A	TRINITY_DN26489_c1_g1_i1	420	NA	NA	+	TRINITY_DN26489_c1_g1_i1	NA	NA	NA	GG	GG	GG	GG	AA	AA
	UTRINITY_DN8712_c0_g2_i2_469	G/A	TRINITY_DN8712_c0_g2_i2	469	NA	NA	+	TRINITY_DN8712_c0_g2_i2	NA	NA	NA	GG	GG	GG	GG	AA	AA
	UTRINITY_DN56276_c0_g2_i3_173	C/T	TRINITY_DN56276_c0_g2_i3	173	NA	NA	+	TRINITY_DN56276_c0_g2_i3	NA	NA	NA	CC	CC	CC	CC	TT	TT
	UTRINITY_DN47232_c0_g5_i1_265	T/C	TRINITY_DN47232_c0_g5_i1	265	NA	NA	+	TRINITY_DN47232_c0_g5_i1	NA	NA	NA	TC	TC	TT	TT	TT	TT
	UTRINITY_DN21044_c0_g2_i1_246	A/G	TRINITY_DN21044_c0_g2_i1	246	NA	NA	+	TRINITY_DN21044_c0_g2_i1	NA	NA	NA	AA	AA	AA	AA	GG	GG
	UTRINITY_DN10916_c0_g1_i3_2717	T/C	TRINITY_DN10916_c0_g1_i3	2717	NA	NA	+	TRINITY_DN10916_c0_g1_i3	NA	NA	NA	TT	TT	TT	TT	CC	CC
	UTRINITY_DN10916_c0_g1_i3_2889	C/T	TRINITY_DN10916_c0_g1_i3	2889	NA	NA	+	TRINITY_DN10916_c0_g1_i3	NA	NA	NA	CC	CC	CC	CC	TT	TT
	UTRINITY_DN3229_c0_g1_i2_133	C/T	TRINITY_DN3229_c0_g1_i2	133	NA	NA	+	TRINITY_DN3229_c0_g1_i2	NA	NA	NA	CC	CC	CT	CT	CT	CT
	UTRINITY_DN3229_c0_g1_i2_593	T/C	TRINITY_DN3229_c0_g1_i2	593	NA	NA	+	TRINITY_DN3229_c0_g1_i2	NA	NA	NA	TT	TT	TT	TT	TC	TC
	UTRINITY_DN3229_c0_g1_i2_735	C/A	TRINITY_DN3229_c0_g1_i2	735	NA	NA	+	TRINITY_DN3229_c0_g1_i2	NA	NA	NA	CC	CC	CC	CC	CA	CA
	UTRINITY_DN3229_c0_g1_i2_744	A/G	TRINITY_DN3229_c0_g1_i2	744	NA	NA	+	TRINITY_DN3229_c0_g1_i2	NA	NA	NA	AA	AA	AA	AA	AG	AG
	UTRINITY_DN7400_c0_g1_i1_987	G/C	TRINITY_DN7400_c0_g1_i1	987	NA	NA	+	TRINITY_DN7400_c0_g1_i1	NA	NA	NA	GG	GG	GG	GG	CC	CC
	UTRINITY_DN2923_c0_g1_i5_1163	C/T	TRINITY_DN2923_c0_g1_i5	1163	NA	NA	+	TRINITY_DN2923_c0_g1_i5	NA	NA	NA	CC	CC	CC	CC	TT	TT
	UTRINITY_DN2923_c0_g1_i5_1630	A/G	TRINITY_DN2923_c0_g1_i5	1630	NA	NA	+	TRINITY_DN2923_c0_g1_i5	NA	NA	NA	AA	AA	AA	AA	GG	GG
	UTRINITY_DN2923_c0_g1_i5_1678	A/G	TRINITY_DN2923_c0_g1_i5	1678	NA	NA	+	TRINITY_DN2923_c0_g1_i5	NA	NA	NA	AA	AA	GG	GG	AA	AA
	UTRINITY_DN7682_c0_g1_i6_1707	C/T	TRINITY_DN7682_c0_g1_i6	1707	NA	NA	+	TRINITY_DN7682_c0_g1_i6	NA	NA	NA	CC	CC	CT	CT	CC	CC
	UTRINITY_DN7682_c0_g1_i6_1711	C/G	TRINITY_DN7682_c0_g1_i6	1711	NA	NA	+	TRINITY_DN7682_c0_g1_i6	NA	NA	NA	CC	CC	CG	CG	CC	CC
	UTRINITY_DN9587_c1_g2_i3_852	T/C	TRINITY_DN9587_c1_g2_i3	852	NA	NA	+	TRINITY_DN9587_c1_g2_i3	NA	NA	NA	TC	TC	TT	TT	TC	TC
	UTRINITY_DN9587_c1_g2_i3_1737	G/A	TRINITY_DN9587_c1_g2_i3	1737	NA	NA	+	TRINITY_DN9587_c1_g2_i3	NA	NA	NA	GA	GA	GG	GG	GA	GA
	UTRINITY_DN3646_c0_g1_i2_2721	C/G	TRINITY_DN3646_c0_g1_i2	2721	NA	NA	+	TRINITY_DN3646_c0_g1_i2	NA	NA	NA	CC	CC	CC	CC	GG	GG
	UTRINITY_DN20075_c0_g1_i1_310	G/C	TRINITY_DN20075_c0_g1_i1	310	NA	NA	+	TRINITY_DN20075_c0_g1_i1	NA	NA	NA	GG	GG	GG	GG	GC	GC
	UTRINITY_DN20075_c0_g1_i1_447	A/G	TRINITY_DN20075_c0_g1_i1	447	NA	NA	+	TRINITY_DN20075_c0_g1_i1	NA	NA	NA	AA	AA	AA	AA	AG	AG
	UTRINITY_DN20075_c0_g1_i1_665	A/G	TRINITY_DN20075_c0_g1_i1	665	NA	NA	+	TRINITY_DN20075_c0_g1_i1	NA	NA	NA	AA	AA	AA	AA	AG	AG
	UTRINITY_DN12330_c0_g1_i6_227	C/G	TRINITY_DN12330_c0_g1_i6	227	NA	NA	+	TRINITY_DN12330_c0_g1_i6	NA	NA	NA	GG	GG	CC	CC	CC	CC
	UTRINITY_DN12330_c0_g1_i6_239	C/T	TRINITY_DN12330_c0_g1_i6	239	NA	NA	+	TRINITY_DN12330_c0_g1_i6	NA	NA	NA	TT	TT	CC	CC	CC	CC
	UTRINITY_DN12330_c0_g1_i6_251	C/T	TRINITY_DN12330_c0_g1_i6	251	NA	NA	+	TRINITY_DN12330_c0_g1_i6	NA	NA	NA	TT	TT	CC	CC	CC	CC
	UTRINITY_DN14362_c0_g1_i3_319	G/C	TRINITY_DN14362_c0_g1_i3	319	NA	NA	+	TRINITY_DN14362_c0_g1_i3	NA	NA	NA	GG	GG	GG	GG	GC	GC
	UTRINITY_DN3263_c0_g1_i5_1567	G/A	TRINITY_DN3263_c0_g1_i5	1567	NA	NA	+	TRINITY_DN3263_c0_g1_i5	NA	NA	NA	GG	GG	GG	GG	AA	AA
	UTRINITY_DN3263_c0_g1_i5_1588	A/G	TRINITY_DN3263_c0_g1_i5	1588	NA	NA	+	TRINITY_DN3263_c0_g1_i5	NA	NA	NA	AA	AA	AA	AA	GG	GG
	UTRINITY_DN3263_c0_g1_i5_1589	G/A	TRINITY_DN3263_c0_g1_i5	1589	NA	NA	+	TRINITY_DN3263_c0_g1_i5	NA	NA	NA	GG	GG	GG	GG	AA	AA
	UTRINITY_DN3263_c0_g1_i5_1720	T/C	TRINITY_DN3263_c0_g1_i5	1720	NA	NA	+	TRINITY_DN3263_c0_g1_i5	NA	NA	NA	TT	TT	TT	TT	CC	CC
	UTRINITY_DN3842_c0_g1_i1_973	A/G	TRINITY_DN3842_c0_g1_i1	973	NA	NA	+	TRINITY_DN3842_c0_g1_i1	NA	NA	NA	AA	AA	AA	AA	GG	GG
	UTRINITY_DN3842_c0_g1_i1_974	A/T	TRINITY_DN3842_c0_g1_i1	974	NA	NA	+	TRINITY_DN3842_c0_g1_i1	NA	NA	NA	AA	AA	AA	AA	TT	TT
	UTRINITY_DN413_c0_g1_i16_3418	C/T	TRINITY_DN413_c0_g1_i16	3418	NA	NA	+	TRINITY_DN413_c0_g1_i16	NA	NA	NA	TT	TT	CC	CC	CC	CC
	UTRINITY_DN37273_c0_g1_i2_882	G/A	TRINITY_DN37273_c0_g1_i2	882	NA	NA	+	TRINITY_DN37273_c0_g1_i2	NA	NA	NA	GG	GG	AA	AA	GG	GG
	UTRINITY_DN9301_c0_g1_i2_298	C/T	TRINITY_DN9301_c0_g1_i2	298	NA	NA	+	TRINITY_DN9301_c0_g1_i2	NA	NA	NA	CT	CT	CC	CC	CC	CC
	UTRINITY_DN9301_c0_g1_i2_314	T/G	TRINITY_DN9301_c0_g1_i2	314	NA	NA	+	TRINITY_DN9301_c0_g1_i2	NA	NA	NA	TG	TG	TT	TT	TT	TT
	UTRINITY_DN9301_c0_g1_i2_364	T/C	TRINITY_DN9301_c0_g1_i2	364	NA	NA	+	TRINITY_DN9301_c0_g1_i2	NA	NA	NA	TC	TC	TT	TT	TT	TT
	UTRINITY_DN4919_c0_g1_i9_1184	A/G	TRINITY_DN4919_c0_g1_i9	1184	NA	NA	+	TRINITY_DN4919_c0_g1_i9	NA	NA	NA	AA	AA	AG	AG	AG	AG
	UTRINITY_DN1116_c0_g1_i2_1393	C/T	TRINITY_DN1116_c0_g1_i2	1393	NA	NA	+	TRINITY_DN1116_c0_g1_i2	NA	NA	NA	TT	TT	CC	CC	CC	CC
	UTRINITY_DN20893_c0_g1_i1_604	C/T	TRINITY_DN20893_c0_g1_i1	604	NA	NA	+	TRINITY_DN20893_c0_g1_i1	NA	NA	NA	CC	CC	CT	CT	CC	CC
	UTRINITY_DN20893_c0_g1_i1_862	A/C	TRINITY_DN20893_c0_g1_i1	862	NA	NA	+	TRINITY_DN20893_c0_g1_i1	NA	NA	NA	AA	AA	AC	AC	AA	AA
	UTRINITY_DN20893_c0_g1_i1_926	A/G	TRINITY_DN20893_c0_g1_i1	926	NA	NA	+	TRINITY_DN20893_c0_g1_i1	NA	NA	NA	AA	AA	AG	AG	AA	AA
	UTRINITY_DN15841_c0_g1_i5_1936	T/C	TRINITY_DN15841_c0_g1_i5	1936	NA	NA	+	TRINITY_DN15841_c0_g1_i5	NA	NA	NA	TT	TT	TC	TC	TT	TT
	UTRINITY_DN22230_c0_g1_i3_184	G/T	TRINITY_DN22230_c0_g1_i3	184	NA	NA	+	TRINITY_DN22230_c0_g1_i3	NA	NA	NA	GG	GG	GG	GG	GT	GT
	UTRINITY_DN11468_c0_g1_i9_2347	T/A	TRINITY_DN11468_c0_g1_i9	2347	NA	NA	+	TRINITY_DN11468_c0_g1_i9	NA	NA	NA	TT	TT	AA	AA	TT	TT
	UTRINITY_DN1168_c1_g1_i4_400	C/T	TRINITY_DN1168_c1_g1_i4	400	NA	NA	+	TRINITY_DN1168_c1_g1_i4	NA	NA	NA	CT	CT	CT	CT	CC	CC
	UTRINITY_DN7709_c0_g1_i6_4303	T/C	TRINITY_DN7709_c0_g1_i6	4303	NA	NA	+	TRINITY_DN7709_c0_g1_i6	NA	NA	NA	TT	TT	CC	CC	TT	TT
	UTRINITY_DN7709_c0_g1_i6_4327	G/A	TRINITY_DN7709_c0_g1_i6	4327	NA	NA	+	TRINITY_DN7709_c0_g1_i6	NA	NA	NA	GG	GG	GG	GG	AA	AA
	UTRINITY_DN7709_c0_g1_i6_4380	T/G	TRINITY_DN7709_c0_g1_i6	4380	NA	NA	+	TRINITY_DN7709_c0_g1_i6	NA	NA	NA	TT	TT	TT	TT	GG	GG
	UTRINITY_DN12476_c0_g1_i7_413	C/A	TRINITY_DN12476_c0_g1_i7	413	NA	NA	+	TRINITY_DN12476_c0_g1_i7	NA	NA	NA	CC	CC	CC	CC	AA	AA
	UTRINITY_DN1106_c0_g1_i1_1177	T/C	TRINITY_DN1106_c0_g1_i1	1177	NA	NA	+	TRINITY_DN1106_c0_g1_i1	NA	NA	NA	CT	CT	TT	TT	CC	CC
	UTRINITY_DN81_c0_g1_i18_184	G/T	TRINITY_DN81_c0_g1_i18	184	NA	NA	+	TRINITY_DN81_c0_g1_i18	NA	NA	NA	GG	GG	GG	GG	GT	GT
	UTRINITY_DN196_c0_g1_i2_2193	A/C	TRINITY_DN196_c0_g1_i2	2193	NA	NA	+	TRINITY_DN196_c0_g1_i2	NA	NA	NA	AA	AA	AC	AC	AC	AC
	UTRINITY_DN196_c0_g1_i2_2194	A/T	TRINITY_DN196_c0_g1_i2	2194	NA	NA	+	TRINITY_DN196_c0_g1_i2	NA	NA	NA	AA	AA	AT	AT	AT	AT
	UTRINITY_DN10676_c0_g1_i6_3813	C/T	TRINITY_DN10676_c0_g1_i6	3813	NA	NA	+	TRINITY_DN10676_c0_g1_i6	NA	NA	NA	CC	CC	TT	TT	CC	CC
	UTRINITY_DN2316_c0_g1_i1_1646	C/W	TRINITY_DN2316_c0_g1_i1	1646	NA	NA	+	TRINITY_DN2316_c0_g1_i1	NA	NA	NA	CT	CT	CA	CA	CT	CT
	UTRINITY_DN1039_c0_g1_i7_1265	C/T	TRINITY_DN1039_c0_g1_i7	1265	NA	NA	+	TRINITY_DN1039_c0_g1_i7	NA	NA	NA	CC	CC	CC	CC	TT	TT
	UTRINITY_DN1039_c0_g1_i7_1291	C/T	TRINITY_DN1039_c0_g1_i7	1291	NA	NA	+	TRINITY_DN1039_c0_g1_i7	NA	NA	NA	CC	CC	CC	CC	TT	TT
	UTRINITY_DN6901_c0_g1_i7_88	T/A	TRINITY_DN6901_c0_g1_i7	88	NA	NA	+	TRINITY_DN6901_c0_g1_i7	NA	NA	NA	TT	TT	TT	TT	AA	AA
	UTRINITY_DN3641_c0_g1_i10_1488	G/T	TRINITY_DN3641_c0_g1_i10	1488	NA	NA	+	TRINITY_DN3641_c0_g1_i10	NA	NA	NA	GG	GG	GG	GG	TT	TT
	UTRINITY_DN3641_c0_g1_i10_1530	G/A	TRINITY_DN3641_c0_g1_i10	1530	NA	NA	+	TRINITY_DN3641_c0_g1_i10	NA	NA	NA	GG	GG	GG	GG	AA	AA
	UTRINITY_DN6963_c0_g1_i1_1579	A/G	TRINITY_DN6963_c0_g1_i1	1579	NA	NA	+	TRINITY_DN6963_c0_g1_i1	NA	NA	NA	AA	AA	AA	AA	GG	GG
	UTRINITY_DN6963_c0_g1_i1_1591	C/T	TRINITY_DN6963_c0_g1_i1	1591	NA	NA	+	TRINITY_DN6963_c0_g1_i1	NA	NA	NA	CC	CC	CC	CC	TT	TT
	UTRINITY_DN11970_c0_g1_i1_854	C/G	TRINITY_DN11970_c0_g1_i1	854	NA	NA	+	TRINITY_DN11970_c0_g1_i1	NA	NA	NA	CC	CC	CC	CC	GG	GG
	UTRINITY_DN1605_c0_g2_i3_641	C/T	TRINITY_DN1605_c0_g2_i3	641	NA	NA	+	TRINITY_DN1605_c0_g2_i3	NA	NA	NA	CC	CC	TT	TT	CC	CC
	UTRINITY_DN7513_c0_g1_i4_1237	A/G	TRINITY_DN7513_c0_g1_i4	1237	NA	NA	+	TRINITY_DN7513_c0_g1_i4	NA	NA	NA	GG	GG	AA	AA	AA	AA
	UTRINITY_DN3212_c1_g1_i11_84	C/T	TRINITY_DN3212_c1_g1_i11	84	NA	NA	+	TRINITY_DN3212_c1_g1_i11	NA	NA	NA	CC	CC	CC	CC	CT	CT
	UTRINITY_DN3212_c1_g1_i11_136	C/T	TRINITY_DN3212_c1_g1_i11	136	NA	NA	+	TRINITY_DN3212_c1_g1_i11	NA	NA	NA	CC	CC	CC	CC	CT	CT
	UTRINITY_DN3212_c1_g1_i11_146	A/G	TRINITY_DN3212_c1_g1_i11	146	NA	NA	+	TRINITY_DN3212_c1_g1_i11	NA	NA	NA	AG	AG	AA	AA	AG	AG
	UTRINITY_DN3252_c0_g1_i8_221	G/A	TRINITY_DN3252_c0_g1_i8	221	NA	NA	+	TRINITY_DN3252_c0_g1_i8	NA	NA	NA	--	--	GG	GG	AG	AG
	UTRINITY_DN4_c1_g1_i2_1065	T/C	TRINITY_DN4_c1_g1_i2	1065	NA	NA	+	TRINITY_DN4_c1_g1_i2	NA	NA	NA	TT	TT	TT	TT	CC	CC
	UTRINITY_DN13897_c0_g4_i1_142	C/T	TRINITY_DN13897_c0_g4_i1	142	NA	NA	+	TRINITY_DN13897_c0_g4_i1	NA	NA	NA	TC	TC	TC	TC	CC	CC
	UTRINITY_DN874_c0_g2_i1_1307	T/G	TRINITY_DN874_c0_g2_i1	1307	NA	NA	+	TRINITY_DN874_c0_g2_i1	NA	NA	NA	TT	TT	TT	TT	GG	GG
	UTRINITY_DN16167_c0_g1_i1_299	G/C	TRINITY_DN16167_c0_g1_i1	299	NA	NA	+	TRINITY_DN16167_c0_g1_i1	NA	NA	NA	GG	GG	GG	GG	CC	CC
	UTRINITY_DN2283_c1_g1_i1_198	C/G	TRINITY_DN2283_c1_g1_i1	198	NA	NA	+	TRINITY_DN2283_c1_g1_i1	NA	NA	NA	CC	CC	CG	CG	CC	CC
	UTRINITY_DN235481_c0_g1_i1_118	C/A	TRINITY_DN235481_c0_g1_i1	118	NA	NA	+	TRINITY_DN235481_c0_g1_i1	NA	NA	NA	CC	CC	AA	AA	CC	CC
	UTRINITY_DN4462_c0_g1_i6_1011	C/G	TRINITY_DN4462_c0_g1_i6	1011	NA	NA	+	TRINITY_DN4462_c0_g1_i6	NA	NA	NA	CC	CC	CC	CC	GG	GG
	UTRINITY_DN4462_c0_g1_i6_1014	T/G	TRINITY_DN4462_c0_g1_i6	1014	NA	NA	+	TRINITY_DN4462_c0_g1_i6	NA	NA	NA	TT	TT	TT	TT	GG	GG
	UTRINITY_DN4462_c0_g1_i6_1015	G/C	TRINITY_DN4462_c0_g1_i6	1015	NA	NA	+	TRINITY_DN4462_c0_g1_i6	NA	NA	NA	GG	GG	GG	GG	CC	CC
	UTRINITY_DN4462_c0_g1_i6_1020	G/A	TRINITY_DN4462_c0_g1_i6	1020	NA	NA	+	TRINITY_DN4462_c0_g1_i6	NA	NA	NA	GG	GG	GG	GG	AA	AA
	UTRINITY_DN4462_c0_g1_i6_1024	A/G	TRINITY_DN4462_c0_g1_i6	1024	NA	NA	+	TRINITY_DN4462_c0_g1_i6	NA	NA	NA	AA	AA	AA	AA	GG	GG
	UTRINITY_DN10277_c0_g1_i4_581	T/C	TRINITY_DN10277_c0_g1_i4	581	NA	NA	+	TRINITY_DN10277_c0_g1_i4	NA	NA	NA	TT	TT	TT	TT	CC	CC
	UTRINITY_DN10277_c0_g1_i4_673	T/C	TRINITY_DN10277_c0_g1_i4	673	NA	NA	+	TRINITY_DN10277_c0_g1_i4	NA	NA	NA	CC	CC	TT	TT	TT	TT
	UTRINITY_DN667_c0_g1_i8_664	C/G	TRINITY_DN667_c0_g1_i8	664	NA	NA	+	TRINITY_DN667_c0_g1_i8	NA	NA	NA	GC	GC	GC	GC	CC	CC
	UTRINITY_DN16530_c1_g1_i7_82	T/G	TRINITY_DN16530_c1_g1_i7	82	NA	NA	+	TRINITY_DN16530_c1_g1_i7	NA	NA	NA	TT	TT	TT	TT	GG	GG
	UTRINITY_DN8516_c0_g1_i13_159	C/T	TRINITY_DN8516_c0_g1_i13	159	NA	NA	+	TRINITY_DN8516_c0_g1_i13	NA	NA	NA	CT	CT	CC	CC	CT	CT
	UTRINITY_DN68889_c0_g1_i1_90	G/A	TRINITY_DN68889_c0_g1_i1	90	NA	NA	+	TRINITY_DN68889_c0_g1_i1	NA	NA	NA	GG	GG	GG	GG	AA	AA
	UTRINITY_DN996_c0_g1_i5_1268	T/C	TRINITY_DN996_c0_g1_i5	1268	NA	NA	+	TRINITY_DN996_c0_g1_i5	NA	NA	NA	TT	TT	TT	TT	CC	CC
	UTRINITY_DN8114_c0_g1_i2_257	G/A	TRINITY_DN8114_c0_g1_i2	257	NA	NA	+	TRINITY_DN8114_c0_g1_i2	NA	NA	NA	GA	GA	GA	GA	GG	GG
	UTRINITY_DN2771_c0_g1_i10_620	T/C	TRINITY_DN2771_c0_g1_i10	620	NA	NA	+	TRINITY_DN2771_c0_g1_i10	NA	NA	NA	CC	CC	TT	TT	TT	TT
	UTRINITY_DN37801_c0_g1_i1_169	A/G	TRINITY_DN37801_c0_g1_i1	169	NA	NA	+	TRINITY_DN37801_c0_g1_i1	NA	NA	NA	AG	AG	AG	AG	AA	AA
	UTRINITY_DN37801_c0_g1_i1_181	C/T	TRINITY_DN37801_c0_g1_i1	181	NA	NA	+	TRINITY_DN37801_c0_g1_i1	NA	NA	NA	CT	CT	CT	CT	CC	CC
	UTRINITY_DN37801_c0_g1_i1_235	A/G	TRINITY_DN37801_c0_g1_i1	235	NA	NA	+	TRINITY_DN37801_c0_g1_i1	NA	NA	NA	AG	AG	AG	AG	AA	AA
	UTRINITY_DN1852_c0_g1_i1_527	C/T	TRINITY_DN1852_c0_g1_i1	527	NA	NA	+	TRINITY_DN1852_c0_g1_i1	NA	NA	NA	CC	CC	CC	CC	TT	TT
	UTRINITY_DN1852_c0_g1_i1_723	C/T	TRINITY_DN1852_c0_g1_i1	723	NA	NA	+	TRINITY_DN1852_c0_g1_i1	NA	NA	NA	CC	CC	CC	CC	TT	TT
	UTRINITY_DN2082_c0_g1_i9_328	G/A	TRINITY_DN2082_c0_g1_i9	328	NA	NA	+	TRINITY_DN2082_c0_g1_i9	NA	NA	NA	GG	GG	GG	GG	AA	AA
	UTRINITY_DN4876_c0_g1_i5_271	G/C	TRINITY_DN4876_c0_g1_i5	271	NA	NA	+	TRINITY_DN4876_c0_g1_i5	NA	NA	NA	GG	GG	GG	GG	CC	CC
	UTRINITY_DN7295_c0_g1_i3_855	C/T	TRINITY_DN7295_c0_g1_i3	855	NA	NA	+	TRINITY_DN7295_c0_g1_i3	NA	NA	NA	TT	TT	CC	CC	CC	CC
	UTRINITY_DN3034_c0_g1_i1_251	G/A	TRINITY_DN3034_c0_g1_i1	251	NA	NA	+	TRINITY_DN3034_c0_g1_i1	NA	NA	NA	GG	GG	GG	GG	AA	AA
	UTRINITY_DN7644_c0_g1_i10_3645	C/A	TRINITY_DN7644_c0_g1_i10	3645	NA	NA	+	TRINITY_DN7644_c0_g1_i10	NA	NA	NA	CA	CA	CA	CA	CC	CC
	UTRINITY_DN32567_c0_g1_i4_423	G/C	TRINITY_DN32567_c0_g1_i4	423	NA	NA	+	TRINITY_DN32567_c0_g1_i4	NA	NA	NA	GG	GG	GG	GG	CC	CC
	UTRINITY_DN6544_c0_g1_i1_442	T/C	TRINITY_DN6544_c0_g1_i1	442	NA	NA	+	TRINITY_DN6544_c0_g1_i1	NA	NA	NA	CT	CT	TT	TT	TT	TT
	UTRINITY_DN6544_c0_g1_i1_445	T/C	TRINITY_DN6544_c0_g1_i1	445	NA	NA	+	TRINITY_DN6544_c0_g1_i1	NA	NA	NA	CT	CT	TT	TT	TT	TT
	UTRINITY_DN46625_c0_g1_i3_249	T/C	TRINITY_DN46625_c0_g1_i3	249	NA	NA	+	TRINITY_DN46625_c0_g1_i3	NA	NA	NA	TT	TT	TT	TT	CC	CC
	UTRINITY_DN27899_c0_g3_i1_156	G/A	TRINITY_DN27899_c0_g3_i1	156	NA	NA	+	TRINITY_DN27899_c0_g3_i1	NA	NA	NA	GG	GG	GG	GG	AA	AA
	UTRINITY_DN1009_c2_g1_i2_269	G/C	TRINITY_DN1009_c2_g1_i2	269	NA	NA	+	TRINITY_DN1009_c2_g1_i2	NA	NA	NA	GG	GG	GC	GC	GG	GG
	UTRINITY_DN1009_c2_g1_i2_650	G/T	TRINITY_DN1009_c2_g1_i2	650	NA	NA	+	TRINITY_DN1009_c2_g1_i2	NA	NA	NA	GT	GT	GG	GG	GT	GT
	UTRINITY_DN28133_c0_g1_i1_134	T/C	TRINITY_DN28133_c0_g1_i1	134	NA	NA	+	TRINITY_DN28133_c0_g1_i1	NA	NA	NA	TT	TT	TT	TT	CC	CC
	UTRINITY_DN33678_c0_g1_i1_209	A/G	TRINITY_DN33678_c0_g1_i1	209	NA	NA	+	TRINITY_DN33678_c0_g1_i1	NA	NA	NA	AG	AG	AG	AG	AA	AA
	UTRINITY_DN1673_c0_g2_i1_483	A/T	TRINITY_DN1673_c0_g2_i1	483	NA	NA	+	TRINITY_DN1673_c0_g2_i1	NA	NA	NA	--	--	TT	TT	AA	AA
	UTRINITY_DN1673_c0_g2_i1_484	A/G	TRINITY_DN1673_c0_g2_i1	484	NA	NA	+	TRINITY_DN1673_c0_g2_i1	NA	NA	NA	--	--	AA	AA	GG	GG
	UTRINITY_DN1673_c0_g2_i1_485	T/C	TRINITY_DN1673_c0_g2_i1	485	NA	NA	+	TRINITY_DN1673_c0_g2_i1	NA	NA	NA	--	--	TT	TT	CC	CC
	UTRINITY_DN1673_c0_g2_i1_487	A/T	TRINITY_DN1673_c0_g2_i1	487	NA	NA	+	TRINITY_DN1673_c0_g2_i1	NA	NA	NA	--	--	AA	AA	TT	TT
	UTRINITY_DN5390_c0_g1_i5_1092	C/G	TRINITY_DN5390_c0_g1_i5	1092	NA	NA	+	TRINITY_DN5390_c0_g1_i5	NA	NA	NA	CC	CC	GG	GG	CC	CC
	UTRINITY_DN9019_c1_g1_i4_630	A/G	TRINITY_DN9019_c1_g1_i4	630	NA	NA	+	TRINITY_DN9019_c1_g1_i4	NA	NA	NA	AA	AA	AG	AG	AG	AG
	UTRINITY_DN9019_c1_g1_i4_1595	C/T	TRINITY_DN9019_c1_g1_i4	1595	NA	NA	+	TRINITY_DN9019_c1_g1_i4	NA	NA	NA	CC	CC	CC	CC	CT	CT
	UTRINITY_DN10203_c0_g1_i1_3010	T/C	TRINITY_DN10203_c0_g1_i1	3010	NA	NA	+	TRINITY_DN10203_c0_g1_i1	NA	NA	NA	TT	TT	TT	TT	CC	CC
	UTRINITY_DN5703_c0_g1_i3_1097	G/A	TRINITY_DN5703_c0_g1_i3	1097	NA	NA	+	TRINITY_DN5703_c0_g1_i3	NA	NA	NA	AA	AA	GG	GG	GG	GG
	UTRINITY_DN5703_c0_g1_i3_1123	A/G	TRINITY_DN5703_c0_g1_i3	1123	NA	NA	+	TRINITY_DN5703_c0_g1_i3	NA	NA	NA	AA	AA	AA	AA	GG	GG
	UTRINITY_DN3156_c1_g1_i9_306	T/C	TRINITY_DN3156_c1_g1_i9	306	NA	NA	+	TRINITY_DN3156_c1_g1_i9	NA	NA	NA	TT	TT	TC	TC	TC	TC
	UTRINITY_DN10113_c0_g1_i2_1068	T/A	TRINITY_DN10113_c0_g1_i2	1068	NA	NA	+	TRINITY_DN10113_c0_g1_i2	NA	NA	NA	AA	AA	TT	TT	TT	TT
	UTRINITY_DN1360_c0_g1_i1_1171	G/C	TRINITY_DN1360_c0_g1_i1	1171	NA	NA	+	TRINITY_DN1360_c0_g1_i1	NA	NA	NA	GG	GG	GG	GG	CC	CC
	UTRINITY_DN13166_c0_g2_i1_49	T/C	TRINITY_DN13166_c0_g2_i1	49	NA	NA	+	TRINITY_DN13166_c0_g2_i1	NA	NA	NA	CC	CC	TT	TT	TT	TT
	UTRINITY_DN479_c0_g1_i6_1861	G/A	TRINITY_DN479_c0_g1_i6	1861	NA	NA	+	TRINITY_DN479_c0_g1_i6	NA	NA	NA	GG	GG	GG	GG	AA	AA
	UTRINITY_DN479_c0_g1_i6_1875	T/G	TRINITY_DN479_c0_g1_i6	1875	NA	NA	+	TRINITY_DN479_c0_g1_i6	NA	NA	NA	TT	TT	TT	TT	GG	GG
	UTRINITY_DN21585_c0_g1_i1_222	A/C	TRINITY_DN21585_c0_g1_i1	222	NA	NA	+	TRINITY_DN21585_c0_g1_i1	NA	NA	NA	AA	AA	AA	AA	CC	CC
	UTRINITY_DN2720_c0_g1_i6_668	C/T	TRINITY_DN2720_c0_g1_i6	668	NA	NA	+	TRINITY_DN2720_c0_g1_i6	NA	NA	NA	CC	CC	CC	CC	TT	TT
	UTRINITY_DN2314_c0_g1_i9_422	C/G	TRINITY_DN2314_c0_g1_i9	422	NA	NA	+	TRINITY_DN2314_c0_g1_i9	NA	NA	NA	CC	CC	GG	GG	CC	CC
	UTRINITY_DN1862_c0_g1_i3_1742	C/G	TRINITY_DN1862_c0_g1_i3	1742	NA	NA	+	TRINITY_DN1862_c0_g1_i3	NA	NA	NA	CC	CC	CG	CG	CC	CC
	UTRINITY_DN6439_c0_g1_i4_901	C/T	TRINITY_DN6439_c0_g1_i4	901	NA	NA	+	TRINITY_DN6439_c0_g1_i4	NA	NA	NA	CC	CC	CC	CC	TT	TT
	UTRINITY_DN879_c0_g2_i1_574	C/A	TRINITY_DN879_c0_g2_i1	574	NA	NA	+	TRINITY_DN879_c0_g2_i1	NA	NA	NA	CC	CC	CC	CC	CA	CA
	UTRINITY_DN879_c0_g2_i1_637	C/T	TRINITY_DN879_c0_g2_i1	637	NA	NA	+	TRINITY_DN879_c0_g2_i1	NA	NA	NA	CT	CT	CT	CT	CC	CC
	UTRINITY_DN879_c0_g2_i1_877	A/G	TRINITY_DN879_c0_g2_i1	877	NA	NA	+	TRINITY_DN879_c0_g2_i1	NA	NA	NA	AA	AA	AG	AG	AG	AG
	UTRINITY_DN879_c0_g2_i1_1048	C/T	TRINITY_DN879_c0_g2_i1	1048	NA	NA	+	TRINITY_DN879_c0_g2_i1	NA	NA	NA	CT	CT	CT	CT	CC	CC
	UTRINITY_DN879_c0_g2_i1_1105	G/A	TRINITY_DN879_c0_g2_i1	1105	NA	NA	+	TRINITY_DN879_c0_g2_i1	NA	NA	NA	GA	GA	GA	GA	GG	GG
	UTRINITY_DN879_c0_g2_i1_1198	C/T	TRINITY_DN879_c0_g2_i1	1198	NA	NA	+	TRINITY_DN879_c0_g2_i1	NA	NA	NA	CT	CT	CT	CT	CC	CC
	UTRINITY_DN879_c0_g2_i1_1213	A/T	TRINITY_DN879_c0_g2_i1	1213	NA	NA	+	TRINITY_DN879_c0_g2_i1	NA	NA	NA	AT	AT	AT	AT	AA	AA
	UTRINITY_DN879_c0_g2_i1_1218	A/C	TRINITY_DN879_c0_g2_i1	1218	NA	NA	+	TRINITY_DN879_c0_g2_i1	NA	NA	NA	AC	AC	AC	AC	AA	AA
	UTRINITY_DN879_c0_g2_i1_1291	A/G	TRINITY_DN879_c0_g2_i1	1291	NA	NA	+	TRINITY_DN879_c0_g2_i1	NA	NA	NA	AA	AA	AA	AA	AG	AG
	UTRINITY_DN879_c0_g2_i1_1495	C/T	TRINITY_DN879_c0_g2_i1	1495	NA	NA	+	TRINITY_DN879_c0_g2_i1	NA	NA	NA	CC	CC	CC	CC	CT	CT
	UTRINITY_DN17617_c0_g1_i1_61	C/T	TRINITY_DN17617_c0_g1_i1	61	NA	NA	+	TRINITY_DN17617_c0_g1_i1	NA	NA	NA	CC	CC	CC	CC	TT	TT
	UTRINITY_DN3228_c0_g1_i4_1790	C/T	TRINITY_DN3228_c0_g1_i4	1790	NA	NA	+	TRINITY_DN3228_c0_g1_i4	NA	NA	NA	CC	CC	CC	CC	CT	CT
	UTRINITY_DN3228_c0_g1_i4_2009	G/A	TRINITY_DN3228_c0_g1_i4	2009	NA	NA	+	TRINITY_DN3228_c0_g1_i4	NA	NA	NA	GG	GG	GA	GA	GG	GG
	UTRINITY_DN3228_c0_g1_i4_2036	C/T	TRINITY_DN3228_c0_g1_i4	2036	NA	NA	+	TRINITY_DN3228_c0_g1_i4	NA	NA	NA	CC	CC	CC	CC	TT	TT
	UTRINITY_DN16665_c0_g2_i2_128	T/G	TRINITY_DN16665_c0_g2_i2	128	NA	NA	+	TRINITY_DN16665_c0_g2_i2	NA	NA	NA	TT	TT	TT	TT	GG	GG
	UTRINITY_DN40401_c0_g1_i5_394	G/T	TRINITY_DN40401_c0_g1_i5	394	NA	NA	+	TRINITY_DN40401_c0_g1_i5	NA	NA	NA	GG	GG	GG	GG	TT	TT
	UTRINITY_DN56601_c0_g1_i2_184	A/G	TRINITY_DN56601_c0_g1_i2	184	NA	NA	+	TRINITY_DN56601_c0_g1_i2	NA	NA	NA	AG	AG	AA	AA	AG	AG
	UTRINITY_DN56601_c0_g1_i2_202	C/T	TRINITY_DN56601_c0_g1_i2	202	NA	NA	+	TRINITY_DN56601_c0_g1_i2	NA	NA	NA	CT	CT	CC	CC	CT	CT
	UTRINITY_DN9885_c0_g1_i7_188	C/G	TRINITY_DN9885_c0_g1_i7	188	NA	NA	+	TRINITY_DN9885_c0_g1_i7	NA	NA	NA	CC	CC	CC	CC	GC	GC
	UTRINITY_DN3063_c2_g2_i1_156	C/G	TRINITY_DN3063_c2_g2_i1	156	NA	NA	+	TRINITY_DN3063_c2_g2_i1	NA	NA	NA	--	--	CC	CC	CG	CG
	UTRINITY_DN3706_c0_g1_i3_325	T/C	TRINITY_DN3706_c0_g1_i3	325	NA	NA	+	TRINITY_DN3706_c0_g1_i3	NA	NA	NA	TT	TT	TT	TT	CC	CC
	UTRINITY_DN3706_c0_g1_i3_384	A/G	TRINITY_DN3706_c0_g1_i3	384	NA	NA	+	TRINITY_DN3706_c0_g1_i3	NA	NA	NA	AA	AA	AA	AA	GG	GG
	UTRINITY_DN33187_c0_g1_i4_226	A/C	TRINITY_DN33187_c0_g1_i4	226	NA	NA	+	TRINITY_DN33187_c0_g1_i4	NA	NA	NA	AA	AA	AC	AC	AA	AA
	UTRINITY_DN13402_c0_g1_i7_1228	C/T	TRINITY_DN13402_c0_g1_i7	1228	NA	NA	+	TRINITY_DN13402_c0_g1_i7	NA	NA	NA	TT	TT	CC	CC	CC	CC
	UTRINITY_DN4083_c0_g1_i5_458	C/T	TRINITY_DN4083_c0_g1_i5	458	NA	NA	+	TRINITY_DN4083_c0_g1_i5	NA	NA	NA	TT	TT	CC	CC	CC	CC
	UTRINITY_DN4083_c0_g1_i5_1907	C/T	TRINITY_DN4083_c0_g1_i5	1907	NA	NA	+	TRINITY_DN4083_c0_g1_i5	NA	NA	NA	CC	CC	TT	TT	CC	CC
	UTRINITY_DN393_c0_g1_i5_532	T/A	TRINITY_DN393_c0_g1_i5	532	NA	NA	+	TRINITY_DN393_c0_g1_i5	NA	NA	NA	TT	TT	TA	TA	TT	TT
	UTRINITY_DN393_c0_g1_i5_563	C/G	TRINITY_DN393_c0_g1_i5	563	NA	NA	+	TRINITY_DN393_c0_g1_i5	NA	NA	NA	CC	CC	CG	CG	CC	CC
	UTRINITY_DN393_c0_g1_i5_579	T/A	TRINITY_DN393_c0_g1_i5	579	NA	NA	+	TRINITY_DN393_c0_g1_i5	NA	NA	NA	TT	TT	TA	TA	TT	TT
	UTRINITY_DN393_c0_g1_i5_587	T/A	TRINITY_DN393_c0_g1_i5	587	NA	NA	+	TRINITY_DN393_c0_g1_i5	NA	NA	NA	TT	TT	TA	TA	TT	TT
	UTRINITY_DN12846_c0_g1_i1_865	C/T	TRINITY_DN12846_c0_g1_i1	865	NA	NA	+	TRINITY_DN12846_c0_g1_i1	NA	NA	NA	CC	CC	CC	CC	TT	TT
	UTRINITY_DN11585_c0_g3_i1_95	T/C	TRINITY_DN11585_c0_g3_i1	95	NA	NA	+	TRINITY_DN11585_c0_g3_i1	NA	NA	NA	TC	TC	TT	TT	TT	TT
	UTRINITY_DN11585_c0_g3_i1_137	T/C	TRINITY_DN11585_c0_g3_i1	137	NA	NA	+	TRINITY_DN11585_c0_g3_i1	NA	NA	NA	TC	TC	TT	TT	TT	TT
	UTRINITY_DN7155_c0_g1_i5_140	T/C	TRINITY_DN7155_c0_g1_i5	140	NA	NA	+	TRINITY_DN7155_c0_g1_i5	NA	NA	NA	TT	TT	TT	TT	CC	CC
	UTRINITY_DN13892_c0_g1_i3_318	G/T	TRINITY_DN13892_c0_g1_i3	318	NA	NA	+	TRINITY_DN13892_c0_g1_i3	NA	NA	NA	GG	GG	GT	GT	GG	GG
	UTRINITY_DN5355_c0_g1_i3_1046	A/G	TRINITY_DN5355_c0_g1_i3	1046	NA	NA	+	TRINITY_DN5355_c0_g1_i3	NA	NA	NA	AA	AA	AA	AA	GG	GG
	UTRINITY_DN31899_c0_g1_i8_138	T/C	TRINITY_DN31899_c0_g1_i8	138	NA	NA	+	TRINITY_DN31899_c0_g1_i8	NA	NA	NA	CC	CC	TT	TT	TC	TC
	UTRINITY_DN10985_c0_g2_i1_95	C/A	TRINITY_DN10985_c0_g2_i1	95	NA	NA	+	TRINITY_DN10985_c0_g2_i1	NA	NA	NA	CC	CC	CC	CC	CA	CA
	UTRINITY_DN10985_c0_g2_i1_132	C/T	TRINITY_DN10985_c0_g2_i1	132	NA	NA	+	TRINITY_DN10985_c0_g2_i1	NA	NA	NA	CC	CC	CC	CC	CT	CT
	UTRINITY_DN10985_c0_g2_i1_511	T/A	TRINITY_DN10985_c0_g2_i1	511	NA	NA	+	TRINITY_DN10985_c0_g2_i1	NA	NA	NA	TT	TT	TA	TA	TA	TA
	UTRINITY_DN10985_c0_g2_i1_514	T/A	TRINITY_DN10985_c0_g2_i1	514	NA	NA	+	TRINITY_DN10985_c0_g2_i1	NA	NA	NA	TT	TT	TA	TA	TA	TA
	UTRINITY_DN10985_c0_g2_i1_741	T/A	TRINITY_DN10985_c0_g2_i1	741	NA	NA	+	TRINITY_DN10985_c0_g2_i1	NA	NA	NA	TT	TT	TA	TA	TA	TA
	UTRINITY_DN10985_c0_g2_i1_750	C/T	TRINITY_DN10985_c0_g2_i1	750	NA	NA	+	TRINITY_DN10985_c0_g2_i1	NA	NA	NA	CC	CC	CT	CT	CT	CT
	UTRINITY_DN10985_c0_g2_i1_756	A/G	TRINITY_DN10985_c0_g2_i1	756	NA	NA	+	TRINITY_DN10985_c0_g2_i1	NA	NA	NA	AA	AA	AG	AG	AG	AG
	UTRINITY_DN5124_c0_g1_i3_1524	T/C	TRINITY_DN5124_c0_g1_i3	1524	NA	NA	+	TRINITY_DN5124_c0_g1_i3	NA	NA	NA	TT	TT	TT	TT	TC	TC
	UTRINITY_DN5124_c0_g1_i3_1798	A/C	TRINITY_DN5124_c0_g1_i3	1798	NA	NA	+	TRINITY_DN5124_c0_g1_i3	NA	NA	NA	AA	AA	AA	AA	CC	CC
	UTRINITY_DN5124_c0_g1_i3_1811	G/A	TRINITY_DN5124_c0_g1_i3	1811	NA	NA	+	TRINITY_DN5124_c0_g1_i3	NA	NA	NA	GG	GG	GG	GG	AA	AA
	UTRINITY_DN576_c0_g1_i1_417	C/T	TRINITY_DN576_c0_g1_i1	417	NA	NA	+	TRINITY_DN576_c0_g1_i1	NA	NA	NA	CC	CC	TT	TT	CC	CC
	UTRINITY_DN576_c0_g1_i1_436	T/C	TRINITY_DN576_c0_g1_i1	436	NA	NA	+	TRINITY_DN576_c0_g1_i1	NA	NA	NA	TT	TT	CC	CC	TT	TT
	UTRINITY_DN13278_c0_g1_i8_205	G/A	TRINITY_DN13278_c0_g1_i8	205	NA	NA	+	TRINITY_DN13278_c0_g1_i8	NA	NA	NA	GG	GG	GG	GG	AA	AA
	UTRINITY_DN4040_c0_g2_i1_1060	A/G	TRINITY_DN4040_c0_g2_i1	1060	NA	NA	+	TRINITY_DN4040_c0_g2_i1	NA	NA	NA	AA	AA	AA	AA	GG	GG
	UTRINITY_DN9593_c0_g1_i1_1541	A/T	TRINITY_DN9593_c0_g1_i1	1541	NA	NA	+	TRINITY_DN9593_c0_g1_i1	NA	NA	NA	TT	TT	AA	AA	AA	AA
	UTRINITY_DN24257_c0_g1_i3_931	T/C	TRINITY_DN24257_c0_g1_i3	931	NA	NA	+	TRINITY_DN24257_c0_g1_i3	NA	NA	NA	TT	TT	CC	CC	TT	TT
	UTRINITY_DN6491_c0_g2_i1_1118	T/C	TRINITY_DN6491_c0_g2_i1	1118	NA	NA	+	TRINITY_DN6491_c0_g2_i1	NA	NA	NA	TT	TT	TC	TC	TC	TC
	UTRINITY_DN6491_c0_g2_i1_1323	G/C	TRINITY_DN6491_c0_g2_i1	1323	NA	NA	+	TRINITY_DN6491_c0_g2_i1	NA	NA	NA	GG	GG	GC	GC	GC	GC
	UTRINITY_DN6190_c0_g1_i1_1311	A/C	TRINITY_DN6190_c0_g1_i1	1311	NA	NA	+	TRINITY_DN6190_c0_g1_i1	NA	NA	NA	AA	AA	CC	CC	AA	AA
	UTRINITY_DN5986_c0_g1_i4_6441	C/T	TRINITY_DN5986_c0_g1_i4	6441	NA	NA	+	TRINITY_DN5986_c0_g1_i4	NA	NA	NA	CC	CC	CC	CC	TT	TT
	UTRINITY_DN4116_c0_g1_i1_2102	C/T	TRINITY_DN4116_c0_g1_i1	2102	NA	NA	+	TRINITY_DN4116_c0_g1_i1	NA	NA	NA	CC	CC	CC	CC	TT	TT
	UTRINITY_DN85316_c1_g1_i1_149	A/G	TRINITY_DN85316_c1_g1_i1	149	NA	NA	+	TRINITY_DN85316_c1_g1_i1	NA	NA	NA	AG	AG	AA	AA	AA	AA
	UTRINITY_DN85316_c1_g1_i1_178	C/G	TRINITY_DN85316_c1_g1_i1	178	NA	NA	+	TRINITY_DN85316_c1_g1_i1	NA	NA	NA	CG	CG	CC	CC	CC	CC
	UTRINITY_DN24486_c0_g1_i5_1248	A/G	TRINITY_DN24486_c0_g1_i5	1248	NA	NA	+	TRINITY_DN24486_c0_g1_i5	NA	NA	NA	AA	AA	AG	AG	AG	AG
	UTRINITY_DN4903_c0_g1_i3_2023	T/C	TRINITY_DN4903_c0_g1_i3	2023	NA	NA	+	TRINITY_DN4903_c0_g1_i3	NA	NA	NA	TT	TT	TT	TT	CC	CC
	UTRINITY_DN17513_c0_g1_i2_460	C/G	TRINITY_DN17513_c0_g1_i2	460	NA	NA	+	TRINITY_DN17513_c0_g1_i2	NA	NA	NA	CC	CC	CC	CC	GG	GG
	UTRINITY_DN17513_c0_g1_i2_566	G/A	TRINITY_DN17513_c0_g1_i2	566	NA	NA	+	TRINITY_DN17513_c0_g1_i2	NA	NA	NA	GG	GG	GG	GG	AA	AA
	UTRINITY_DN2526_c0_g1_i4_3091	T/A	TRINITY_DN2526_c0_g1_i4	3091	NA	NA	+	TRINITY_DN2526_c0_g1_i4	NA	NA	NA	TT	TT	AT	AT	TT	TT
	UTRINITY_DN2536_c0_g2_i3_709	T/C	TRINITY_DN2536_c0_g2_i3	709	NA	NA	+	TRINITY_DN2536_c0_g2_i3	NA	NA	NA	TT	TT	TT	TT	CC	CC
	UTRINITY_DN2536_c0_g2_i3_835	T/G	TRINITY_DN2536_c0_g2_i3	835	NA	NA	+	TRINITY_DN2536_c0_g2_i3	NA	NA	NA	TT	TT	TT	TT	GG	GG
	UTRINITY_DN2536_c0_g2_i3_838	C/A	TRINITY_DN2536_c0_g2_i3	838	NA	NA	+	TRINITY_DN2536_c0_g2_i3	NA	NA	NA	CC	CC	CC	CC	AA	AA
	UTRINITY_DN2536_c0_g2_i3_853	G/A	TRINITY_DN2536_c0_g2_i3	853	NA	NA	+	TRINITY_DN2536_c0_g2_i3	NA	NA	NA	GG	GG	GG	GG	AA	AA
	UTRINITY_DN2536_c0_g2_i3_868	C/T	TRINITY_DN2536_c0_g2_i3	868	NA	NA	+	TRINITY_DN2536_c0_g2_i3	NA	NA	NA	CC	CC	CC	CC	TT	TT
	UTRINITY_DN16131_c0_g1_i6_348	C/G	TRINITY_DN16131_c0_g1_i6	348	NA	NA	+	TRINITY_DN16131_c0_g1_i6	NA	NA	NA	CC	CC	CC	CC	GG	GG
	UTRINITY_DN7397_c0_g1_i10_91	C/G	TRINITY_DN7397_c0_g1_i10	91	NA	NA	+	TRINITY_DN7397_c0_g1_i10	NA	NA	NA	CC	CC	CC	CC	CG	CG
	UTRINITY_DN7397_c0_g1_i10_145	C/G	TRINITY_DN7397_c0_g1_i10	145	NA	NA	+	TRINITY_DN7397_c0_g1_i10	NA	NA	NA	CG	CG	CG	CG	CC	CC
	UTRINITY_DN7397_c0_g1_i10_148	G/A	TRINITY_DN7397_c0_g1_i10	148	NA	NA	+	TRINITY_DN7397_c0_g1_i10	NA	NA	NA	GA	GA	GA	GA	GG	GG
	UTRINITY_DN7397_c0_g1_i10_175	C/T	TRINITY_DN7397_c0_g1_i10	175	NA	NA	+	TRINITY_DN7397_c0_g1_i10	NA	NA	NA	CT	CT	CT	CT	CC	CC
	UTRINITY_DN7397_c0_g1_i10_196	G/A	TRINITY_DN7397_c0_g1_i10	196	NA	NA	+	TRINITY_DN7397_c0_g1_i10	NA	NA	NA	GA	GA	GA	GA	GG	GG
	UTRINITY_DN803_c0_g2_i2_496	T/A	TRINITY_DN803_c0_g2_i2	496	NA	NA	+	TRINITY_DN803_c0_g2_i2	NA	NA	NA	TT	TT	TT	TT	AA	AA
	UTRINITY_DN803_c0_g2_i2_1065	C/T	TRINITY_DN803_c0_g2_i2	1065	NA	NA	+	TRINITY_DN803_c0_g2_i2	NA	NA	NA	TT	TT	CC	CC	CC	CC
	UTRINITY_DN803_c0_g2_i2_1066	T/G	TRINITY_DN803_c0_g2_i2	1066	NA	NA	+	TRINITY_DN803_c0_g2_i2	NA	NA	NA	GG	GG	TT	TT	TT	TT
	UTRINITY_DN803_c0_g2_i2_1070	G/C	TRINITY_DN803_c0_g2_i2	1070	NA	NA	+	TRINITY_DN803_c0_g2_i2	NA	NA	NA	GC	GC	GG	GG	GG	GG
	UTRINITY_DN5068_c0_g1_i11_633	G/C	TRINITY_DN5068_c0_g1_i11	633	NA	NA	+	TRINITY_DN5068_c0_g1_i11	NA	NA	NA	GG	GG	GG	GG	CC	CC
	UTRINITY_DN29143_c0_g2_i1_222	A/T	TRINITY_DN29143_c0_g2_i1	222	NA	NA	+	TRINITY_DN29143_c0_g2_i1	NA	NA	NA	--	--	AA	AA	TT	TT
	UTRINITY_DN3983_c0_g1_i3_2263	G/A	TRINITY_DN3983_c0_g1_i3	2263	NA	NA	+	TRINITY_DN3983_c0_g1_i3	NA	NA	NA	GG	GG	GG	GG	AA	AA
	UTRINITY_DN3983_c0_g1_i3_2316	G/T	TRINITY_DN3983_c0_g1_i3	2316	NA	NA	+	TRINITY_DN3983_c0_g1_i3	NA	NA	NA	GG	GG	GG	GG	TT	TT
	UTRINITY_DN3983_c0_g1_i3_2344	T/C	TRINITY_DN3983_c0_g1_i3	2344	NA	NA	+	TRINITY_DN3983_c0_g1_i3	NA	NA	NA	TT	TT	TT	TT	CC	CC
	UTRINITY_DN3983_c0_g1_i3_2369	A/G	TRINITY_DN3983_c0_g1_i3	2369	NA	NA	+	TRINITY_DN3983_c0_g1_i3	NA	NA	NA	AA	AA	AA	AA	GG	GG
	UTRINITY_DN3983_c0_g1_i3_2413	G/T	TRINITY_DN3983_c0_g1_i3	2413	NA	NA	+	TRINITY_DN3983_c0_g1_i3	NA	NA	NA	GG	GG	GG	GG	TT	TT
	UTRINITY_DN3983_c0_g1_i3_2417	T/C	TRINITY_DN3983_c0_g1_i3	2417	NA	NA	+	TRINITY_DN3983_c0_g1_i3	NA	NA	NA	TT	TT	TT	TT	CC	CC
	UTRINITY_DN3983_c0_g1_i3_2423	G/A	TRINITY_DN3983_c0_g1_i3	2423	NA	NA	+	TRINITY_DN3983_c0_g1_i3	NA	NA	NA	GG	GG	GG	GG	AA	AA
	UTRINITY_DN3983_c0_g1_i3_2433	T/C	TRINITY_DN3983_c0_g1_i3	2433	NA	NA	+	TRINITY_DN3983_c0_g1_i3	NA	NA	NA	TT	TT	TT	TT	CC	CC
	UTRINITY_DN3983_c0_g1_i3_2442	G/T	TRINITY_DN3983_c0_g1_i3	2442	NA	NA	+	TRINITY_DN3983_c0_g1_i3	NA	NA	NA	GG	GG	GG	GG	TT	TT
	UTRINITY_DN3983_c0_g1_i3_2448	T/A	TRINITY_DN3983_c0_g1_i3	2448	NA	NA	+	TRINITY_DN3983_c0_g1_i3	NA	NA	NA	TT	TT	TT	TT	AA	AA
	UTRINITY_DN4314_c0_g1_i4_476	G/C	TRINITY_DN4314_c0_g1_i4	476	NA	NA	+	TRINITY_DN4314_c0_g1_i4	NA	NA	NA	GG	GG	GG	GG	CC	CC
	UTRINITY_DN167883_c0_g1_i1_34	C/T	TRINITY_DN167883_c0_g1_i1	34	NA	NA	+	TRINITY_DN167883_c0_g1_i1	NA	NA	NA	CT	CT	CC	CC	CC	CC
	UTRINITY_DN2926_c0_g1_i5_903	G/C	TRINITY_DN2926_c0_g1_i5	903	NA	NA	+	TRINITY_DN2926_c0_g1_i5	NA	NA	NA	GG	GG	CC	CC	GG	GG
	UTRINITY_DN2926_c0_g1_i5_904	C/T	TRINITY_DN2926_c0_g1_i5	904	NA	NA	+	TRINITY_DN2926_c0_g1_i5	NA	NA	NA	CC	CC	TT	TT	CC	CC
	UTRINITY_DN1855_c0_g2_i1_316	T/C	TRINITY_DN1855_c0_g2_i1	316	NA	NA	+	TRINITY_DN1855_c0_g2_i1	NA	NA	NA	TC	TC	TC	TC	TT	TT
	UTRINITY_DN1855_c0_g2_i1_351	G/A	TRINITY_DN1855_c0_g2_i1	351	NA	NA	+	TRINITY_DN1855_c0_g2_i1	NA	NA	NA	GG	GG	GG	GG	GA	GA
	UTRINITY_DN1855_c0_g2_i1_494	C/A	TRINITY_DN1855_c0_g2_i1	494	NA	NA	+	TRINITY_DN1855_c0_g2_i1	NA	NA	NA	CA	CA	CA	CA	CC	CC
	UTRINITY_DN1855_c0_g2_i1_1935	C/T	TRINITY_DN1855_c0_g2_i1	1935	NA	NA	+	TRINITY_DN1855_c0_g2_i1	NA	NA	NA	CC	CC	CC	CC	CT	CT
	UTRINITY_DN1855_c0_g2_i1_1941	G/A	TRINITY_DN1855_c0_g2_i1	1941	NA	NA	+	TRINITY_DN1855_c0_g2_i1	NA	NA	NA	GG	GG	GG	GG	GA	GA
	UTRINITY_DN1855_c0_g2_i1_1987	T/G	TRINITY_DN1855_c0_g2_i1	1987	NA	NA	+	TRINITY_DN1855_c0_g2_i1	NA	NA	NA	TT	TT	TT	TT	TG	TG
	UTRINITY_DN1855_c0_g2_i1_1989	A/G	TRINITY_DN1855_c0_g2_i1	1989	NA	NA	+	TRINITY_DN1855_c0_g2_i1	NA	NA	NA	AA	AA	AA	AA	AG	AG
	UTRINITY_DN1855_c0_g2_i1_2272	A/G	TRINITY_DN1855_c0_g2_i1	2272	NA	NA	+	TRINITY_DN1855_c0_g2_i1	NA	NA	NA	AA	AA	AA	AA	AG	AG
	UTRINITY_DN6596_c0_g1_i3_666	A/C	TRINITY_DN6596_c0_g1_i3	666	NA	NA	+	TRINITY_DN6596_c0_g1_i3	NA	NA	NA	CC	CC	AA	AA	AA	AA
	UTRINITY_DN1832_c2_g1_i1_576	G/A	TRINITY_DN1832_c2_g1_i1	576	NA	NA	+	TRINITY_DN1832_c2_g1_i1	NA	NA	NA	GG	GG	GG	GG	AA	AA
	UTRINITY_DN2967_c0_g1_i15_1004	T/C	TRINITY_DN2967_c0_g1_i15	1004	NA	NA	+	TRINITY_DN2967_c0_g1_i15	NA	NA	NA	TT	TT	TC	TC	TC	TC
	UTRINITY_DN42472_c0_g1_i1_210	C/T	TRINITY_DN42472_c0_g1_i1	210	NA	NA	+	TRINITY_DN42472_c0_g1_i1	NA	NA	NA	CT	CT	CC	CC	CC	CC
	UTRINITY_DN42472_c0_g1_i1_229	A/G	TRINITY_DN42472_c0_g1_i1	229	NA	NA	+	TRINITY_DN42472_c0_g1_i1	NA	NA	NA	AG	AG	AA	AA	AA	AA
	UTRINITY_DN42472_c0_g1_i1_288	C/T	TRINITY_DN42472_c0_g1_i1	288	NA	NA	+	TRINITY_DN42472_c0_g1_i1	NA	NA	NA	CT	CT	CC	CC	CC	CC
	UTRINITY_DN42472_c0_g1_i1_305	G/A	TRINITY_DN42472_c0_g1_i1	305	NA	NA	+	TRINITY_DN42472_c0_g1_i1	NA	NA	NA	GA	GA	GG	GG	GG	GG
	UTRINITY_DN13656_c0_g2_i1_162	G/A	TRINITY_DN13656_c0_g2_i1	162	NA	NA	+	TRINITY_DN13656_c0_g2_i1	NA	NA	NA	AG	AG	AG	AG	GG	GG
	UTRINITY_DN13656_c0_g2_i1_189	T/C	TRINITY_DN13656_c0_g2_i1	189	NA	NA	+	TRINITY_DN13656_c0_g2_i1	NA	NA	NA	CT	CT	CT	CT	TT	TT
	UTRINITY_DN13656_c0_g2_i1_249	C/T	TRINITY_DN13656_c0_g2_i1	249	NA	NA	+	TRINITY_DN13656_c0_g2_i1	NA	NA	NA	TC	TC	TC	TC	CC	CC
	UTRINITY_DN13656_c0_g2_i1_282	A/G	TRINITY_DN13656_c0_g2_i1	282	NA	NA	+	TRINITY_DN13656_c0_g2_i1	NA	NA	NA	AA	AA	AG	AG	GG	GG
	UTRINITY_DN9429_c0_g1_i5_397	T/C	TRINITY_DN9429_c0_g1_i5	397	NA	NA	+	TRINITY_DN9429_c0_g1_i5	NA	NA	NA	TT	TT	CC	CC	TT	TT
	UTRINITY_DN41726_c0_g2_i1_128	G/A	TRINITY_DN41726_c0_g2_i1	128	NA	NA	+	TRINITY_DN41726_c0_g2_i1	NA	NA	NA	GG	GG	GG	GG	GA	GA
	UTRINITY_DN41726_c0_g2_i1_182	A/G	TRINITY_DN41726_c0_g2_i1	182	NA	NA	+	TRINITY_DN41726_c0_g2_i1	NA	NA	NA	AA	AA	AG	AG	AG	AG
	UTRINITY_DN32507_c0_g2_i2_576	A/G	TRINITY_DN32507_c0_g2_i2	576	NA	NA	+	TRINITY_DN32507_c0_g2_i2	NA	NA	NA	AA	AA	AA	AA	GG	GG
	UTRINITY_DN5573_c0_g1_i3_1483	A/C	TRINITY_DN5573_c0_g1_i3	1483	NA	NA	+	TRINITY_DN5573_c0_g1_i3	NA	NA	NA	AA	AA	CC	CC	AA	AA
	UTRINITY_DN6741_c0_g1_i3_419	T/C	TRINITY_DN6741_c0_g1_i3	419	NA	NA	+	TRINITY_DN6741_c0_g1_i3	NA	NA	NA	TT	TT	TT	TT	CC	CC
	UTRINITY_DN11054_c0_g2_i3_262	C/T	TRINITY_DN11054_c0_g2_i3	262	NA	NA	+	TRINITY_DN11054_c0_g2_i3	NA	NA	NA	CC	CC	CC	CC	CT	CT
	UTRINITY_DN11054_c0_g2_i3_373	C/T	TRINITY_DN11054_c0_g2_i3	373	NA	NA	+	TRINITY_DN11054_c0_g2_i3	NA	NA	NA	CC	CC	CC	CC	CT	CT
	UTRINITY_DN3105_c0_g1_i7_224	G/C	TRINITY_DN3105_c0_g1_i7	224	NA	NA	+	TRINITY_DN3105_c0_g1_i7	NA	NA	NA	CG	CG	CG	CG	GG	GG
	UTRINITY_DN5212_c0_g1_i17_2469	C/G	TRINITY_DN5212_c0_g1_i17	2469	NA	NA	+	TRINITY_DN5212_c0_g1_i17	NA	NA	NA	CC	CC	CC	CC	GG	GG
	UTRINITY_DN10131_c0_g1_i2_703	T/C	TRINITY_DN10131_c0_g1_i2	703	NA	NA	+	TRINITY_DN10131_c0_g1_i2	NA	NA	NA	TT	TT	CC	CC	TT	TT
	UTRINITY_DN6729_c0_g1_i6_747	G/A	TRINITY_DN6729_c0_g1_i6	747	NA	NA	+	TRINITY_DN6729_c0_g1_i6	NA	NA	NA	GG	GG	GG	GG	AA	AA
	UTRINITY_DN8722_c0_g2_i10_91	A/G	TRINITY_DN8722_c0_g2_i10	91	NA	NA	+	TRINITY_DN8722_c0_g2_i10	NA	NA	NA	AA	AA	AA	AA	AG	AG
	UTRINITY_DN8722_c0_g2_i10_130	T/C	TRINITY_DN8722_c0_g2_i10	130	NA	NA	+	TRINITY_DN8722_c0_g2_i10	NA	NA	NA	TT	TT	TT	TT	TC	TC
	UTRINITY_DN8722_c0_g2_i10_163	G/A	TRINITY_DN8722_c0_g2_i10	163	NA	NA	+	TRINITY_DN8722_c0_g2_i10	NA	NA	NA	GG	GG	GG	GG	GA	GA
	UTRINITY_DN8722_c0_g2_i10_199	T/C	TRINITY_DN8722_c0_g2_i10	199	NA	NA	+	TRINITY_DN8722_c0_g2_i10	NA	NA	NA	TT	TT	TT	TT	TC	TC
	UTRINITY_DN8722_c0_g2_i10_328	T/G	TRINITY_DN8722_c0_g2_i10	328	NA	NA	+	TRINITY_DN8722_c0_g2_i10	NA	NA	NA	TT	TT	TT	TT	TG	TG
	UTRINITY_DN11230_c0_g1_i2_2264	C/G	TRINITY_DN11230_c0_g1_i2	2264	NA	NA	+	TRINITY_DN11230_c0_g1_i2	NA	NA	NA	CC	CC	CC	CC	CG	CG
	UTRINITY_DN12351_c0_g1_i7_104	T/G	TRINITY_DN12351_c0_g1_i7	104	NA	NA	+	TRINITY_DN12351_c0_g1_i7	NA	NA	NA	TT	TT	TT	TT	GG	GG
	UTRINITY_DN12351_c0_g1_i7_309	A/G	TRINITY_DN12351_c0_g1_i7	309	NA	NA	+	TRINITY_DN12351_c0_g1_i7	NA	NA	NA	AA	AA	GG	GG	AA	AA
	UTRINITY_DN12351_c0_g1_i7_428	G/C	TRINITY_DN12351_c0_g1_i7	428	NA	NA	+	TRINITY_DN12351_c0_g1_i7	NA	NA	NA	GG	GG	GG	GG	CC	CC
	UTRINITY_DN12351_c0_g1_i7_436	C/T	TRINITY_DN12351_c0_g1_i7	436	NA	NA	+	TRINITY_DN12351_c0_g1_i7	NA	NA	NA	CC	CC	CC	CC	TT	TT
	UTRINITY_DN12351_c0_g1_i7_560	T/G	TRINITY_DN12351_c0_g1_i7	560	NA	NA	+	TRINITY_DN12351_c0_g1_i7	NA	NA	NA	TT	TT	TT	TT	GG	GG
	UTRINITY_DN1602_c0_g1_i2_866	T/C	TRINITY_DN1602_c0_g1_i2	866	NA	NA	+	TRINITY_DN1602_c0_g1_i2	NA	NA	NA	TT	TT	TT	TT	TC	TC
	UTRINITY_DN1602_c0_g1_i2_1373	C/T	TRINITY_DN1602_c0_g1_i2	1373	NA	NA	+	TRINITY_DN1602_c0_g1_i2	NA	NA	NA	CC	CC	CC	CC	CT	CT
	UTRINITY_DN1602_c0_g1_i2_1745	G/A	TRINITY_DN1602_c0_g1_i2	1745	NA	NA	+	TRINITY_DN1602_c0_g1_i2	NA	NA	NA	GG	GG	GG	GG	GA	GA
	UTRINITY_DN1602_c0_g1_i2_1907	C/G	TRINITY_DN1602_c0_g1_i2	1907	NA	NA	+	TRINITY_DN1602_c0_g1_i2	NA	NA	NA	CG	CG	CG	CG	CC	CC
	UTRINITY_DN4012_c1_g1_i8_80	G/A	TRINITY_DN4012_c1_g1_i8	80	NA	NA	+	TRINITY_DN4012_c1_g1_i8	NA	NA	NA	GA	GA	GG	GG	GG	GG
	UTRINITY_DN4012_c1_g1_i8_83	G/C	TRINITY_DN4012_c1_g1_i8	83	NA	NA	+	TRINITY_DN4012_c1_g1_i8	NA	NA	NA	GC	GC	GG	GG	GC	GC
	UTRINITY_DN3595_c0_g1_i3_2238	A/G	TRINITY_DN3595_c0_g1_i3	2238	NA	NA	+	TRINITY_DN3595_c0_g1_i3	NA	NA	NA	AG	AG	AG	AG	AA	AA
	UTRINITY_DN3595_c0_g1_i3_2241	G/A	TRINITY_DN3595_c0_g1_i3	2241	NA	NA	+	TRINITY_DN3595_c0_g1_i3	NA	NA	NA	GA	GA	GA	GA	GG	GG
	UTRINITY_DN1275_c0_g1_i6_2338	T/C	TRINITY_DN1275_c0_g1_i6	2338	NA	NA	+	TRINITY_DN1275_c0_g1_i6	NA	NA	NA	TT	TT	CC	CC	TT	TT
	UTRINITY_DN1275_c0_g1_i6_2520	C/A	TRINITY_DN1275_c0_g1_i6	2520	NA	NA	+	TRINITY_DN1275_c0_g1_i6	NA	NA	NA	CC	CC	CC	CC	AC	AC
	UTRINITY_DN1275_c0_g1_i6_2525	C/T	TRINITY_DN1275_c0_g1_i6	2525	NA	NA	+	TRINITY_DN1275_c0_g1_i6	NA	NA	NA	CC	CC	CC	CC	TC	TC
	UTRINITY_DN1275_c0_g1_i6_2570	T/C	TRINITY_DN1275_c0_g1_i6	2570	NA	NA	+	TRINITY_DN1275_c0_g1_i6	NA	NA	NA	TT	TT	TT	TT	TC	TC
	UTRINITY_DN1275_c0_g1_i6_2574	C/G	TRINITY_DN1275_c0_g1_i6	2574	NA	NA	+	TRINITY_DN1275_c0_g1_i6	NA	NA	NA	CC	CC	CC	CC	CG	CG
	UTRINITY_DN1275_c0_g1_i6_2577	C/T	TRINITY_DN1275_c0_g1_i6	2577	NA	NA	+	TRINITY_DN1275_c0_g1_i6	NA	NA	NA	CC	CC	CC	CC	CT	CT
	UTRINITY_DN1275_c0_g1_i6_2581	G/T	TRINITY_DN1275_c0_g1_i6	2581	NA	NA	+	TRINITY_DN1275_c0_g1_i6	NA	NA	NA	GG	GG	GG	GG	GT	GT
	UTRINITY_DN1275_c0_g1_i6_2583	C/T	TRINITY_DN1275_c0_g1_i6	2583	NA	NA	+	TRINITY_DN1275_c0_g1_i6	NA	NA	NA	CC	CC	CC	CC	CT	CT
	UTRINITY_DN1275_c0_g1_i6_2606	T/C	TRINITY_DN1275_c0_g1_i6	2606	NA	NA	+	TRINITY_DN1275_c0_g1_i6	NA	NA	NA	TT	TT	TT	TT	TC	TC
	UTRINITY_DN23984_c0_g1_i3_884	G/A	TRINITY_DN23984_c0_g1_i3	884	NA	NA	+	TRINITY_DN23984_c0_g1_i3	NA	NA	NA	GG	GG	GG	GG	AA	AA
	UTRINITY_DN11646_c0_g1_i13_406	G/A	TRINITY_DN11646_c0_g1_i13	406	NA	NA	+	TRINITY_DN11646_c0_g1_i13	NA	NA	NA	GG	GG	GA	GA	GG	GG
	UTRINITY_DN1069_c0_g1_i11_1474	G/T	TRINITY_DN1069_c0_g1_i11	1474	NA	NA	+	TRINITY_DN1069_c0_g1_i11	NA	NA	NA	TT	TT	GG	GG	GG	GG
	UTRINITY_DN1069_c0_g1_i11_1476	C/T	TRINITY_DN1069_c0_g1_i11	1476	NA	NA	+	TRINITY_DN1069_c0_g1_i11	NA	NA	NA	TT	TT	CC	CC	CC	CC
	UTRINITY_DN1069_c0_g1_i11_1495	A/G	TRINITY_DN1069_c0_g1_i11	1495	NA	NA	+	TRINITY_DN1069_c0_g1_i11	NA	NA	NA	AA	AA	GG	GG	AA	AA
	UTRINITY_DN15980_c0_g1_i5_1594	T/G	TRINITY_DN15980_c0_g1_i5	1594	NA	NA	+	TRINITY_DN15980_c0_g1_i5	NA	NA	NA	TT	TT	TT	TT	GG	GG
	UTRINITY_DN9560_c0_g1_i1_1662	C/T	TRINITY_DN9560_c0_g1_i1	1662	NA	NA	+	TRINITY_DN9560_c0_g1_i1	NA	NA	NA	CC	CC	CC	CC	TT	TT
	UTRINITY_DN5428_c0_g2_i2_589	T/C	TRINITY_DN5428_c0_g2_i2	589	NA	NA	+	TRINITY_DN5428_c0_g2_i2	NA	NA	NA	TC	TC	TC	TC	TT	TT
	UTRINITY_DN1114_c0_g1_i6_279	G/C	TRINITY_DN1114_c0_g1_i6	279	NA	NA	+	TRINITY_DN1114_c0_g1_i6	NA	NA	NA	GC	GC	GG	GG	GG	GG
	UTRINITY_DN5767_c0_g1_i2_69	G/A	TRINITY_DN5767_c0_g1_i2	69	NA	NA	+	TRINITY_DN5767_c0_g1_i2	NA	NA	NA	GG	GG	GG	GG	AA	AA
	UTRINITY_DN5767_c0_g1_i2_143	A/G	TRINITY_DN5767_c0_g1_i2	143	NA	NA	+	TRINITY_DN5767_c0_g1_i2	NA	NA	NA	AA	AA	AA	AA	GG	GG
	UTRINITY_DN5767_c0_g1_i2_235	C/T	TRINITY_DN5767_c0_g1_i2	235	NA	NA	+	TRINITY_DN5767_c0_g1_i2	NA	NA	NA	CC	CC	CC	CC	TT	TT
	UTRINITY_DN25585_c0_g1_i1_272	C/T	TRINITY_DN25585_c0_g1_i1	272	NA	NA	+	TRINITY_DN25585_c0_g1_i1	NA	NA	NA	CC	CC	CC	CC	TT	TT
	UTRINITY_DN25585_c0_g1_i1_297	G/C	TRINITY_DN25585_c0_g1_i1	297	NA	NA	+	TRINITY_DN25585_c0_g1_i1	NA	NA	NA	GG	GG	GG	GG	CC	CC
	UTRINITY_DN13069_c0_g1_i1_265	G/A	TRINITY_DN13069_c0_g1_i1	265	NA	NA	+	TRINITY_DN13069_c0_g1_i1	NA	NA	NA	GA	GA	GA	GA	GG	GG
	UTRINITY_DN13069_c0_g1_i1_267	G/C	TRINITY_DN13069_c0_g1_i1	267	NA	NA	+	TRINITY_DN13069_c0_g1_i1	NA	NA	NA	GC	GC	GC	GC	GG	GG
	UTRINITY_DN13069_c0_g1_i1_286	A/G	TRINITY_DN13069_c0_g1_i1	286	NA	NA	+	TRINITY_DN13069_c0_g1_i1	NA	NA	NA	AG	AG	AG	AG	AA	AA
	UTRINITY_DN13069_c0_g1_i1_456	C/G	TRINITY_DN13069_c0_g1_i1	456	NA	NA	+	TRINITY_DN13069_c0_g1_i1	NA	NA	NA	CC	CC	GC	GC	GG	GG
	UTRINITY_DN927_c0_g1_i7_698	G/A	TRINITY_DN927_c0_g1_i7	698	NA	NA	+	TRINITY_DN927_c0_g1_i7	NA	NA	NA	GG	GG	GG	GG	AA	AA
	UTRINITY_DN927_c0_g1_i7_800	G/C	TRINITY_DN927_c0_g1_i7	800	NA	NA	+	TRINITY_DN927_c0_g1_i7	NA	NA	NA	GG	GG	GG	GG	CC	CC
	UTRINITY_DN4243_c0_g2_i2_1625	C/T	TRINITY_DN4243_c0_g2_i2	1625	NA	NA	+	TRINITY_DN4243_c0_g2_i2	NA	NA	NA	CC	CC	CC	CC	TT	TT
	UTRINITY_DN14017_c0_g2_i4_965	C/T	TRINITY_DN14017_c0_g2_i4	965	NA	NA	+	TRINITY_DN14017_c0_g2_i4	NA	NA	NA	CT	CT	CT	CT	CC	CC
	UTRINITY_DN14017_c0_g2_i4_1101	G/A	TRINITY_DN14017_c0_g2_i4	1101	NA	NA	+	TRINITY_DN14017_c0_g2_i4	NA	NA	NA	AG	AG	AG	AG	GG	GG
	UTRINITY_DN12100_c0_g1_i8_2245	A/T	TRINITY_DN12100_c0_g1_i8	2245	NA	NA	+	TRINITY_DN12100_c0_g1_i8	NA	NA	NA	AA	AA	AT	AT	AT	AT
	UTRINITY_DN2607_c0_g1_i2_1014	G/A	TRINITY_DN2607_c0_g1_i2	1014	NA	NA	+	TRINITY_DN2607_c0_g1_i2	NA	NA	NA	GA	GA	GA	GA	GG	GG
	UTRINITY_DN11299_c0_g2_i1_39	T/G	TRINITY_DN11299_c0_g2_i1	39	NA	NA	+	TRINITY_DN11299_c0_g2_i1	NA	NA	NA	TG	TG	TG	TG	TT	TT
	UTRINITY_DN11299_c0_g2_i1_106	G/A	TRINITY_DN11299_c0_g2_i1	106	NA	NA	+	TRINITY_DN11299_c0_g2_i1	NA	NA	NA	GA	GA	GA	GA	GG	GG
	UTRINITY_DN11299_c0_g2_i1_142	G/A	TRINITY_DN11299_c0_g2_i1	142	NA	NA	+	TRINITY_DN11299_c0_g2_i1	NA	NA	NA	GG	GG	GG	GG	AG	AG
	UTRINITY_DN11299_c0_g2_i1_156	C/T	TRINITY_DN11299_c0_g2_i1	156	NA	NA	+	TRINITY_DN11299_c0_g2_i1	NA	NA	NA	CC	CC	CC	CC	TC	TC
	UTRINITY_DN11299_c0_g2_i1_157	C/T	TRINITY_DN11299_c0_g2_i1	157	NA	NA	+	TRINITY_DN11299_c0_g2_i1	NA	NA	NA	CC	CC	CC	CC	TC	TC
	UTRINITY_DN11299_c0_g2_i1_159	G/M	TRINITY_DN11299_c0_g2_i1	159	NA	NA	+	TRINITY_DN11299_c0_g2_i1	NA	NA	NA	GG	GG	GC	GC	AG	AG
	UTRINITY_DN11299_c0_g2_i1_292	G/C	TRINITY_DN11299_c0_g2_i1	292	NA	NA	+	TRINITY_DN11299_c0_g2_i1	NA	NA	NA	GG	GG	GG	GG	CC	CC
	UTRINITY_DN11299_c0_g2_i1_298	A/G	TRINITY_DN11299_c0_g2_i1	298	NA	NA	+	TRINITY_DN11299_c0_g2_i1	NA	NA	NA	AA	AA	AA	AA	GG	GG
	UTRINITY_DN26178_c0_g1_i2_937	G/A	TRINITY_DN26178_c0_g1_i2	937	NA	NA	+	TRINITY_DN26178_c0_g1_i2	NA	NA	NA	GG	GG	GG	GG	AA	AA
	UTRINITY_DN89048_c0_g1_i1_193	T/C	TRINITY_DN89048_c0_g1_i1	193	NA	NA	+	TRINITY_DN89048_c0_g1_i1	NA	NA	NA	CC	CC	TT	TT	TT	TT
	UTRINITY_DN4714_c0_g1_i17_470	A/G	TRINITY_DN4714_c0_g1_i17	470	NA	NA	+	TRINITY_DN4714_c0_g1_i17	NA	NA	NA	AA	AA	AA	AA	GG	GG
	UTRINITY_DN4714_c0_g1_i17_608	A/G	TRINITY_DN4714_c0_g1_i17	608	NA	NA	+	TRINITY_DN4714_c0_g1_i17	NA	NA	NA	AA	AA	AA	AA	GA	GA
	UTRINITY_DN8843_c0_g1_i3_2176	G/C	TRINITY_DN8843_c0_g1_i3	2176	NA	NA	+	TRINITY_DN8843_c0_g1_i3	NA	NA	NA	GG	GG	GG	GG	CC	CC
	UTRINITY_DN10683_c0_g1_i8_530	G/C	TRINITY_DN10683_c0_g1_i8	530	NA	NA	+	TRINITY_DN10683_c0_g1_i8	NA	NA	NA	GG	GG	GG	GG	CC	CC
	UTRINITY_DN3607_c0_g1_i3_930	A/G	TRINITY_DN3607_c0_g1_i3	930	NA	NA	+	TRINITY_DN3607_c0_g1_i3	NA	NA	NA	AA	AA	AA	AA	GG	GG
	UTRINITY_DN23480_c0_g1_i1_592	G/T	TRINITY_DN23480_c0_g1_i1	592	NA	NA	+	TRINITY_DN23480_c0_g1_i1	NA	NA	NA	TT	TT	GG	GG	GG	GG
	UTRINITY_DN6949_c0_g3_i3_1262	T/G	TRINITY_DN6949_c0_g3_i3	1262	NA	NA	+	TRINITY_DN6949_c0_g3_i3	NA	NA	NA	TT	TT	TT	TT	GG	GG
	UTRINITY_DN6949_c0_g3_i3_1304	T/C	TRINITY_DN6949_c0_g3_i3	1304	NA	NA	+	TRINITY_DN6949_c0_g3_i3	NA	NA	NA	TC	TC	TC	TC	TT	TT
	UTRINITY_DN6949_c0_g3_i3_1499	C/T	TRINITY_DN6949_c0_g3_i3	1499	NA	NA	+	TRINITY_DN6949_c0_g3_i3	NA	NA	NA	CT	CT	CT	CT	CC	CC
	UTRINITY_DN6949_c0_g3_i3_1508	T/C	TRINITY_DN6949_c0_g3_i3	1508	NA	NA	+	TRINITY_DN6949_c0_g3_i3	NA	NA	NA	TC	TC	TC	TC	TT	TT
	UTRINITY_DN1793_c0_g1_i3_515	A/C	TRINITY_DN1793_c0_g1_i3	515	NA	NA	+	TRINITY_DN1793_c0_g1_i3	NA	NA	NA	AA	AA	AA	AA	CC	CC
	UTRINITY_DN1793_c0_g1_i3_521	C/T	TRINITY_DN1793_c0_g1_i3	521	NA	NA	+	TRINITY_DN1793_c0_g1_i3	NA	NA	NA	CC	CC	CC	CC	TT	TT
	UTRINITY_DN1793_c0_g1_i3_524	C/A	TRINITY_DN1793_c0_g1_i3	524	NA	NA	+	TRINITY_DN1793_c0_g1_i3	NA	NA	NA	CC	CC	CC	CC	AA	AA
	UTRINITY_DN822_c0_g1_i2_816	T/C	TRINITY_DN822_c0_g1_i2	816	NA	NA	+	TRINITY_DN822_c0_g1_i2	NA	NA	NA	TT	TT	TT	TT	CC	CC
	UTRINITY_DN822_c0_g1_i2_819	A/C	TRINITY_DN822_c0_g1_i2	819	NA	NA	+	TRINITY_DN822_c0_g1_i2	NA	NA	NA	AA	AA	AA	AA	CC	CC
	UTRINITY_DN822_c0_g1_i2_822	A/G	TRINITY_DN822_c0_g1_i2	822	NA	NA	+	TRINITY_DN822_c0_g1_i2	NA	NA	NA	AA	AA	AA	AA	GG	GG
	UTRINITY_DN822_c0_g1_i2_855	C/T	TRINITY_DN822_c0_g1_i2	855	NA	NA	+	TRINITY_DN822_c0_g1_i2	NA	NA	NA	CC	CC	CC	CC	TT	TT
	UTRINITY_DN29642_c0_g1_i4_93	A/G	TRINITY_DN29642_c0_g1_i4	93	NA	NA	+	TRINITY_DN29642_c0_g1_i4	NA	NA	NA	AA	AA	AA	AA	AG	AG
	UTRINITY_DN29642_c0_g1_i4_384	C/A	TRINITY_DN29642_c0_g1_i4	384	NA	NA	+	TRINITY_DN29642_c0_g1_i4	NA	NA	NA	CC	CC	CC	CC	AA	AA
	UTRINITY_DN20994_c0_g1_i1_83	G/A	TRINITY_DN20994_c0_g1_i1	83	NA	NA	+	TRINITY_DN20994_c0_g1_i1	NA	NA	NA	GG	GG	GG	GG	AA	AA
	UTRINITY_DN20994_c0_g1_i1_547	G/A	TRINITY_DN20994_c0_g1_i1	547	NA	NA	+	TRINITY_DN20994_c0_g1_i1	NA	NA	NA	GA	GA	GA	GA	GG	GG
	UTRINITY_DN257_c1_g1_i1_980	C/K	TRINITY_DN257_c1_g1_i1	980	NA	NA	+	TRINITY_DN257_c1_g1_i1	NA	NA	NA	CT	CT	CG	CG	CT	CT
	UTRINITY_DN944_c0_g1_i2_3285	T/C	TRINITY_DN944_c0_g1_i2	3285	NA	NA	+	TRINITY_DN944_c0_g1_i2	NA	NA	NA	TC	TC	TC	TC	TT	TT
	UTRINITY_DN11689_c0_g1_i2_2170	G/A	TRINITY_DN11689_c0_g1_i2	2170	NA	NA	+	TRINITY_DN11689_c0_g1_i2	NA	NA	NA	GA	GA	GG	GG	GA	GA
	UTRINITY_DN106_c0_g1_i4_242	G/A	TRINITY_DN106_c0_g1_i4	242	NA	NA	+	TRINITY_DN106_c0_g1_i4	NA	NA	NA	GG	GG	GG	GG	AA	AA
	UTRINITY_DN10366_c1_g2_i1_362	C/T	TRINITY_DN10366_c1_g2_i1	362	NA	NA	+	TRINITY_DN10366_c1_g2_i1	NA	NA	NA	CC	CC	TT	TT	CC	CC
	UTRINITY_DN35414_c0_g1_i5_156	T/C	TRINITY_DN35414_c0_g1_i5	156	NA	NA	+	TRINITY_DN35414_c0_g1_i5	NA	NA	NA	TT	TT	TT	TT	CC	CC
	UTRINITY_DN35414_c0_g1_i5_161	A/C	TRINITY_DN35414_c0_g1_i5	161	NA	NA	+	TRINITY_DN35414_c0_g1_i5	NA	NA	NA	AA	AA	AA	AA	CC	CC
	UTRINITY_DN10797_c0_g1_i1_436	T/G	TRINITY_DN10797_c0_g1_i1	436	NA	NA	+	TRINITY_DN10797_c0_g1_i1	NA	NA	NA	TG	TG	TT	TT	TT	TT
	UTRINITY_DN6461_c0_g1_i4_847	A/G	TRINITY_DN6461_c0_g1_i4	847	NA	NA	+	TRINITY_DN6461_c0_g1_i4	NA	NA	NA	AA	AA	AA	AA	GG	GG
	UTRINITY_DN1570_c1_g1_i1_283	T/G	TRINITY_DN1570_c1_g1_i1	283	NA	NA	+	TRINITY_DN1570_c1_g1_i1	NA	NA	NA	TT	TT	TG	TG	TG	TG
	UTRINITY_DN13992_c0_g1_i2_2087	A/G	TRINITY_DN13992_c0_g1_i2	2087	NA	NA	+	TRINITY_DN13992_c0_g1_i2	NA	NA	NA	AA	AA	AG	AG	AG	AG
	UTRINITY_DN53014_c0_g1_i2_186	G/A	TRINITY_DN53014_c0_g1_i2	186	NA	NA	+	TRINITY_DN53014_c0_g1_i2	NA	NA	NA	GG	GG	GG	GG	AA	AA
	UTRINITY_DN22369_c0_g1_i1_429	T/A	TRINITY_DN22369_c0_g1_i1	429	NA	NA	+	TRINITY_DN22369_c0_g1_i1	NA	NA	NA	TT	TT	TT	TT	TA	TA
	UTRINITY_DN19328_c0_g1_i1_670	G/C	TRINITY_DN19328_c0_g1_i1	670	NA	NA	+	TRINITY_DN19328_c0_g1_i1	NA	NA	NA	GG	GG	GG	GG	GC	GC
	UTRINITY_DN68339_c0_g2_i1_205	A/G	TRINITY_DN68339_c0_g2_i1	205	NA	NA	+	TRINITY_DN68339_c0_g2_i1	NA	NA	NA	AA	AA	AA	AA	GG	GG
	UTRINITY_DN68339_c0_g2_i1_215	T/C	TRINITY_DN68339_c0_g2_i1	215	NA	NA	+	TRINITY_DN68339_c0_g2_i1	NA	NA	NA	TT	TT	TT	TT	CC	CC
	UTRINITY_DN23116_c0_g1_i4_137	C/G	TRINITY_DN23116_c0_g1_i4	137	NA	NA	+	TRINITY_DN23116_c0_g1_i4	NA	NA	NA	CC	CC	CC	CC	GG	GG
	UTRINITY_DN23116_c0_g1_i4_138	G/T	TRINITY_DN23116_c0_g1_i4	138	NA	NA	+	TRINITY_DN23116_c0_g1_i4	NA	NA	NA	GG	GG	GG	GG	TT	TT
	UTRINITY_DN5449_c0_g1_i5_1545	T/C	TRINITY_DN5449_c0_g1_i5	1545	NA	NA	+	TRINITY_DN5449_c0_g1_i5	NA	NA	NA	TT	TT	CC	CC	TT	TT
	UTRINITY_DN37579_c0_g1_i1_164	G/C	TRINITY_DN37579_c0_g1_i1	164	NA	NA	+	TRINITY_DN37579_c0_g1_i1	NA	NA	NA	GG	GG	GG	GG	GC	GC
	UTRINITY_DN5750_c0_g1_i6_4729	G/A	TRINITY_DN5750_c0_g1_i6	4729	NA	NA	+	TRINITY_DN5750_c0_g1_i6	NA	NA	NA	GG	GG	GG	GG	AA	AA
	UTRINITY_DN5750_c0_g1_i6_5181	G/C	TRINITY_DN5750_c0_g1_i6	5181	NA	NA	+	TRINITY_DN5750_c0_g1_i6	NA	NA	NA	GC	GC	GC	GC	GG	GG
	UTRINITY_DN2243_c0_g1_i4_63	C/T	TRINITY_DN2243_c0_g1_i4	63	NA	NA	+	TRINITY_DN2243_c0_g1_i4	NA	NA	NA	CC	CC	CC	CC	TT	TT
	UTRINITY_DN7948_c1_g1_i2_132	T/A	TRINITY_DN7948_c1_g1_i2	132	NA	NA	+	TRINITY_DN7948_c1_g1_i2	NA	NA	NA	TT	TT	TT	TT	AA	AA
	UTRINITY_DN14773_c0_g1_i1_378	A/G	TRINITY_DN14773_c0_g1_i1	378	NA	NA	+	TRINITY_DN14773_c0_g1_i1	NA	NA	NA	AA	AA	AA	AA	GG	GG
	UTRINITY_DN33145_c0_g1_i1_346	C/T	TRINITY_DN33145_c0_g1_i1	346	NA	NA	+	TRINITY_DN33145_c0_g1_i1	NA	NA	NA	CC	CC	CC	CC	TT	TT
	UTRINITY_DN4913_c0_g1_i1_1004	A/G	TRINITY_DN4913_c0_g1_i1	1004	NA	NA	+	TRINITY_DN4913_c0_g1_i1	NA	NA	NA	AA	AA	AA	AA	GG	GG
	UTRINITY_DN9408_c0_g1_i1_66	G/A	TRINITY_DN9408_c0_g1_i1	66	NA	NA	+	TRINITY_DN9408_c0_g1_i1	NA	NA	NA	GG	GG	GG	GG	AA	AA
	UTRINITY_DN38904_c0_g2_i1_241	A/G	TRINITY_DN38904_c0_g2_i1	241	NA	NA	+	TRINITY_DN38904_c0_g2_i1	NA	NA	NA	AG	AG	AG	AG	AA	AA
	UTRINITY_DN6271_c1_g1_i9_2818	A/G	TRINITY_DN6271_c1_g1_i9	2818	NA	NA	+	TRINITY_DN6271_c1_g1_i9	NA	NA	NA	AA	AA	AA	AA	GG	GG
	UTRINITY_DN5106_c0_g1_i3_2556	T/A	TRINITY_DN5106_c0_g1_i3	2556	NA	NA	+	TRINITY_DN5106_c0_g1_i3	NA	NA	NA	TT	TT	TT	TT	AA	AA
	UTRINITY_DN5106_c0_g1_i3_2574	C/T	TRINITY_DN5106_c0_g1_i3	2574	NA	NA	+	TRINITY_DN5106_c0_g1_i3	NA	NA	NA	CC	CC	CC	CC	TT	TT
	UTRINITY_DN5106_c0_g1_i3_2582	T/C	TRINITY_DN5106_c0_g1_i3	2582	NA	NA	+	TRINITY_DN5106_c0_g1_i3	NA	NA	NA	TT	TT	TT	TT	CC	CC
	UTRINITY_DN5106_c0_g1_i3_2631	A/G	TRINITY_DN5106_c0_g1_i3	2631	NA	NA	+	TRINITY_DN5106_c0_g1_i3	NA	NA	NA	AA	AA	AA	AA	GG	GG
	UTRINITY_DN5106_c0_g1_i3_2640	C/T	TRINITY_DN5106_c0_g1_i3	2640	NA	NA	+	TRINITY_DN5106_c0_g1_i3	NA	NA	NA	CC	CC	CC	CC	TT	TT
	UTRINITY_DN6379_c0_g1_i2_994	G/A	TRINITY_DN6379_c0_g1_i2	994	NA	NA	+	TRINITY_DN6379_c0_g1_i2	NA	NA	NA	GG	GG	GG	GG	AA	AA
	UTRINITY_DN6379_c0_g1_i2_995	C/T	TRINITY_DN6379_c0_g1_i2	995	NA	NA	+	TRINITY_DN6379_c0_g1_i2	NA	NA	NA	CC	CC	CC	CC	TT	TT
	UTRINITY_DN30122_c0_g3_i1_119	A/G	TRINITY_DN30122_c0_g3_i1	119	NA	NA	+	TRINITY_DN30122_c0_g3_i1	NA	NA	NA	AA	AA	GG	GG	AA	AA
	UTRINITY_DN30122_c0_g3_i1_191	T/C	TRINITY_DN30122_c0_g3_i1	191	NA	NA	+	TRINITY_DN30122_c0_g3_i1	NA	NA	NA	TT	TT	TT	TT	CC	CC
	UTRINITY_DN30122_c0_g3_i1_326	A/G	TRINITY_DN30122_c0_g3_i1	326	NA	NA	+	TRINITY_DN30122_c0_g3_i1	NA	NA	NA	AA	AA	GG	GG	AA	AA
	UTRINITY_DN30122_c0_g3_i1_467	A/C	TRINITY_DN30122_c0_g3_i1	467	NA	NA	+	TRINITY_DN30122_c0_g3_i1	NA	NA	NA	AA	AA	CC	CC	AA	AA
	UTRINITY_DN82030_c0_g1_i1_679	T/G	TRINITY_DN82030_c0_g1_i1	679	NA	NA	+	TRINITY_DN82030_c0_g1_i1	NA	NA	NA	TG	TG	TT	TT	TG	TG
	UTRINITY_DN35476_c0_g2_i1_289	C/G	TRINITY_DN35476_c0_g2_i1	289	NA	NA	+	TRINITY_DN35476_c0_g2_i1	NA	NA	NA	CC	CC	CC	CC	CG	CG
	UTRINITY_DN7946_c0_g1_i1_721	G/C	TRINITY_DN7946_c0_g1_i1	721	NA	NA	+	TRINITY_DN7946_c0_g1_i1	NA	NA	NA	GG	GG	CC	CC	GG	GG
	UTRINITY_DN5192_c0_g1_i12_778	T/C	TRINITY_DN5192_c0_g1_i12	778	NA	NA	+	TRINITY_DN5192_c0_g1_i12	NA	NA	NA	TT	TT	TT	TT	CC	CC
	UTRINITY_DN22049_c0_g1_i1_145	A/G	TRINITY_DN22049_c0_g1_i1	145	NA	NA	+	TRINITY_DN22049_c0_g1_i1	NA	NA	NA	AA	AA	AA	AA	GG	GG
	UTRINITY_DN13909_c0_g2_i1_3125	G/A	TRINITY_DN13909_c0_g2_i1	3125	NA	NA	+	TRINITY_DN13909_c0_g2_i1	NA	NA	NA	GG	GG	GG	GG	AA	AA
	UTRINITY_DN13909_c0_g2_i1_3162	A/G	TRINITY_DN13909_c0_g2_i1	3162	NA	NA	+	TRINITY_DN13909_c0_g2_i1	NA	NA	NA	AA	AA	AG	AG	AA	AA
	UTRINITY_DN12953_c1_g1_i1_805	T/C	TRINITY_DN12953_c1_g1_i1	805	NA	NA	+	TRINITY_DN12953_c1_g1_i1	NA	NA	NA	TT	TT	CC	CC	TT	TT
	UTRINITY_DN5907_c0_g2_i3_1017	G/A	TRINITY_DN5907_c0_g2_i3	1017	NA	NA	+	TRINITY_DN5907_c0_g2_i3	NA	NA	NA	GG	GG	GG	GG	AA	AA
	UTRINITY_DN356_c0_g1_i3_430	C/T	TRINITY_DN356_c0_g1_i3	430	NA	NA	+	TRINITY_DN356_c0_g1_i3	NA	NA	NA	TT	TT	CC	CC	CC	CC
	UTRINITY_DN17865_c0_g2_i1_925	C/T	TRINITY_DN17865_c0_g2_i1	925	NA	NA	+	TRINITY_DN17865_c0_g2_i1	NA	NA	NA	CC	CC	CT	CT	CC	CC
	UTRINITY_DN771_c0_g2_i3_1136	A/G	TRINITY_DN771_c0_g2_i3	1136	NA	NA	+	TRINITY_DN771_c0_g2_i3	NA	NA	NA	AA	AA	AA	AA	AG	AG
	UTRINITY_DN771_c0_g2_i3_1162	C/G	TRINITY_DN771_c0_g2_i3	1162	NA	NA	+	TRINITY_DN771_c0_g2_i3	NA	NA	NA	CC	CC	CC	CC	GG	GG
	UTRINITY_DN771_c0_g2_i3_1173	G/C	TRINITY_DN771_c0_g2_i3	1173	NA	NA	+	TRINITY_DN771_c0_g2_i3	NA	NA	NA	GG	GG	GG	GG	CC	CC
	UTRINITY_DN4665_c0_g1_i3_365	G/A	TRINITY_DN4665_c0_g1_i3	365	NA	NA	+	TRINITY_DN4665_c0_g1_i3	NA	NA	NA	GG	GG	GG	GG	AA	AA
	UTRINITY_DN2536_c0_g1_i1_603	T/C	TRINITY_DN2536_c0_g1_i1	603	NA	NA	+	TRINITY_DN2536_c0_g1_i1	NA	NA	NA	TT	TT	TT	TT	TC	TC
	UTRINITY_DN2536_c0_g1_i1_808	C/T	TRINITY_DN2536_c0_g1_i1	808	NA	NA	+	TRINITY_DN2536_c0_g1_i1	NA	NA	NA	CT	CT	CT	CT	CC	CC
	UTRINITY_DN2536_c0_g1_i1_1048	A/G	TRINITY_DN2536_c0_g1_i1	1048	NA	NA	+	TRINITY_DN2536_c0_g1_i1	NA	NA	NA	AA	AA	AA	AA	AG	AG
	UTRINITY_DN2536_c0_g1_i1_1120	G/A	TRINITY_DN2536_c0_g1_i1	1120	NA	NA	+	TRINITY_DN2536_c0_g1_i1	NA	NA	NA	GA	GA	GA	GA	GG	GG
[truncated: 26,364 more rows]

## Sheet: InDels_RD5
	Insight into the mechanisms of terminal HS-tolerance in wheat mutant with improved nutritional quality through de novo transcriptome sequencing Ranjeet R. Kumar, Suman Bakshi, Kavita Dubey, Sumedha Hasija, Gyanendra K. Rai, Neelu Jain, Sanjay Jambhulkar, Bhupinder Singh, Gyanendra P. Singh, & Shelly Praveen
[truncated: 848 more rows]

[truncated: 1 more sheets: InDels_RD10]
