# Supplementary material for: Insight into the mechanisms of terminal HS-tolerance in wheat mutant with improved nutritional quality through de novo transcriptome sequencing
Source: Research Square preprint supplement (doi:10.21203/rs.3.rs-241832/v1), 2021-02-26
Supplement: Supplementary file 4 [file 3b06d539695e671db5697318.xlsx]

## Sheet: Upregulated_M3H_vs_M
	Insight into the mechanisms of terminal HS-tolerance in wheat mutant with improved nutritional quality through de novo transcriptome sequencing Ranjeet R. Kumar, Suman Bakshi, Kavita Dubey, Sumedha Hasija, Gyanendra K. Rai, Neelu Jain, Sanjay Jambhulkar, Bhupinder Singh, Gyanendra P. Singh, & Shelly Praveen
	Table S7 List of differentially expressed transcripts (upregulated) identified in wheat mutant exposed to heat stress through de novo transcriptome sequencing using Illumina HiSeq 4000
	S. No.	logFC	PValue	FDR	DEGType	Trinity_GeneID	Wheat_Transcript_ID	Transcript_Start	Transcript_End	Transcript length	E value	Wheat_Gene_ID	Chromosome	Gene_Start	Gene_End	Description/Protein Name
	TRINITY_DN13064_c0_g1	10.5618	2.04e-80	1.67e-75	UP	TRINITY_DN13064_c0_g1	TraesCS3A01G274400.1	1897	1961	2742	4.71e-25	TraesCS3A01G274400	chr3A	503751786	503755145	Chaperone clpb, putative
	TRINITY_DN21155_c0_g2	15.6719	9.95e-78	4.09e-73	UP	TRINITY_DN21155_c0_g2	TraesCS4A01G068200.1	423	259	717	3.11e-77	TraesCS4A01G068200	chr4A	66608871	66609979	Heat shock protein
	TRINITY_DN126_c1_g1	9.81338	1.04e-74	2.85e-70	UP	TRINITY_DN126_c1_g1	TraesCS3D01G045700.1	316	456	456	1.49e-58	TraesCS3D01G045700	chr3D	17413454	17413909	Heat shock protein
	TRINITY_DN34989_c1_g1	17.4652	2.59e-74	5.33e-70	UP	TRINITY_DN34989_c1_g1	TraesCS2A01G312900.1	660	609	660	2.15e-19	TraesCS2A01G312900	chr2A	537456162	537456821	Heat-shock protein, putative
	TRINITY_DN75467_c1_g1	12.5442	1.72e-73	2.84e-69	UP	TRINITY_DN75467_c1_g1	TraesCS3D01G045600.1	277	371	456	4.18e-43	TraesCS3D01G045600	chr3D	17406976	17407431	Heat shock protein
	TRINITY_DN16896_c0_g1	15.106	4.58e-73	6.27e-69	UP	TRINITY_DN16896_c0_g1	TraesCS2B01G294500.1	586	636	1764	1.32e-18	TraesCS2B01G294500	chr2B	411140591	411143398	Peptidylprolyl isomerase
	TRINITY_DN7556_c0_g1	8.42328	4.6e-71	5.41e-67	UP	TRINITY_DN7556_c0_g1	TraesCS5D01G269400.1	1	417	417	0	TraesCS5D01G269400	chr5D	372454297	372454713	Calcium-binding EF-hand family protein-like
	TRINITY_DN11203_c0_g1	14.7118	7.46e-68	7.67e-64	UP	TRINITY_DN11203_c0_g1	TraesCS3D01G273600.2	2231	2486	2688	9.27e-133	TraesCS3D01G273600	chr3D	379536248	379539614	Chaperone clpb, putative
	TRINITY_DN437_c1_g1	8.50088	8.28e-64	7.57e-60	UP	TRINITY_DN437_c1_g1	TraesCS3D01G351900.1	214	615	1959	0	TraesCS3D01G351900	chr3D	462850049	462852773	70 kDa heat shock protein
	TRINITY_DN36949_c0_g1	8.21916	1.27e-63	1.05e-59	UP	TRINITY_DN36949_c0_g1	TraesCS4D01G212300.1	371	474	474	3.17e-46	TraesCS4D01G212300	chr4D	365217434	365218278	Heat shock protein
	TRINITY_DN20098_c0_g2	14.4719	3.37e-63	2.52e-59	UP	TRINITY_DN20098_c0_g2	TraesCS3D01G273600.1	2707	2436	2742	2.95e-138	TraesCS3D01G273600	chr3D	379536248	379539614	Chaperone clpb, putative
	TRINITY_DN43367_c0_g1	8.97964	2.56e-61	1.76e-57	UP	TRINITY_DN43367_c0_g1	TraesCS3D01G046300.1	20	254	456	1.86e-114	TraesCS3D01G046300	chr3D	17556434	17557122	Heat shock protein
	TRINITY_DN21155_c0_g1	15.5023	2.91e-61	1.84e-57	UP	TRINITY_DN21155_c0_g1	TraesCS4B01G225400.1	265	442	732	2.65e-89	TraesCS4B01G225400	chr4B	471956428	471957605	Heat shock protein
	TRINITY_DN1603_c0_g2	7.57275	1.63e-60	9.6e-57	UP	NA	NA	NA	NA	NA	NA	NA	NA	NA	NA	NA
	TRINITY_DN1711_c0_g1	10.134	4.47e-60	2.45e-56	UP	TRINITY_DN1711_c0_g1	TraesCS4A01G092700.1	1	115	468	1.44e-52	TraesCS4A01G092700	chr4A	100102028	100102737	Heat-shock protein
	TRINITY_DN7672_c0_g1	7.38381	1.57e-59	8.07e-56	UP	TRINITY_DN7672_c0_g1	TraesCS1A01G395300.1	605	681	1119	1.39e-32	TraesCS1A01G395300	chr1A	560960168	560962700	Chaperone protein dnaJ
	TRINITY_DN11388_c0_g1	14.0182	2.47e-59	1.19e-55	UP	NA	NA	NA	NA	NA	NA	NA	NA	NA	NA	NA
	TRINITY_DN1220_c0_g1	8.15172	2.21e-58	1.01e-54	UP	TRINITY_DN1220_c0_g1	TraesCS3A01G274500.1	136	15	1284	6.95e-50	TraesCS3A01G274500	chr3A	503753941	503755224	syntaxin of plants 73
	TRINITY_DN2070_c0_g1	10.7567	4.8e-58	2.08e-54	UP	NA	NA	NA	NA	NA	NA	NA	NA	NA	NA	NA
	TRINITY_DN25343_c0_g1	15.5077	1.98e-57	8.15e-54	UP	TRINITY_DN25343_c0_g1	TraesCS3A01G274400.1	1278	1343	2742	3.52e-27	TraesCS3A01G274400	chr3A	503751786	503755145	Chaperone clpb, putative
	TRINITY_DN31360_c0_g1	11.6182	3.38e-57	1.33e-53	UP	TRINITY_DN31360_c0_g1	TraesCS3B01G390700.1	214	307	1959	3.29e-42	TraesCS3B01G390700	chr3B	615748962	615751502	70 kDa heat shock protein
	TRINITY_DN34989_c0_g1	14.6484	5.42e-57	2.03e-53	UP	NA	NA	NA	NA	NA	NA	NA	NA	NA	NA	NA
	TRINITY_DN20098_c0_g1	8.24035	1.26e-56	4.52e-53	UP	TRINITY_DN20098_c0_g1	TraesCS3D01G273600.2	2434	2688	2688	2.99e-130	TraesCS3D01G273600	chr3D	379536248	379539614	Chaperone clpb, putative
	TRINITY_DN8393_c7_g1	17.5158	5.01e-56	1.72e-52	UP	TRINITY_DN8393_c7_g1	TraesCS5B01G245700.1	192	423	465	1.82e-119	TraesCS5B01G245700	chr5B	426651504	426651968	Heat shock protein
	TRINITY_DN219201_c0_g1	13.6214	5.37e-56	1.77e-52	UP	TRINITY_DN219201_c0_g1	TraesCS3B01G233100.1	591	855	1797	1.62e-120	TraesCS3B01G233100	chr3B	360009741	360011537	RNA-directed DNA polymerase (Reverse transcriptase)
	TRINITY_DN2534_c1_g2	9.39058	3.27e-55	1.03e-51	UP	NA	NA	NA	NA	NA	NA	NA	NA	NA	NA	NA
	TRINITY_DN2240_c0_g1	11.1856	3.62e-55	1.1e-51	UP	TRINITY_DN2240_c0_g1	TraesCS4D01G226000.1	259	705	717	0	TraesCS4D01G226000	chr4D	384975222	384976356	Heat shock protein
	TRINITY_DN17739_c0_g1	13.8906	6.55e-55	1.92e-51	UP	TRINITY_DN17739_c0_g1	TraesCS2B01G294500.1	875	937	1764	1.52e-25	TraesCS2B01G294500	chr2B	411140591	411143398	Peptidylprolyl isomerase
	TRINITY_DN10371_c0_g1	13.7862	8.01e-55	2.27e-51	UP	TRINITY_DN10371_c0_g1	TraesCS5A01G384100.1	271	416	750	8.33e-70	TraesCS5A01G384100	chr5A	581926267	581927150	Bax inhibitor-1 family protein
	TRINITY_DN6476_c0_g1	7.76672	9.46e-55	2.59e-51	UP	TRINITY_DN6476_c0_g1	TraesCS3D01G114800.1	1	489	489	0	TraesCS3D01G114800	chr3D	68273803	68274291	Heat-shock protein, putative
	TRINITY_DN2891_c0_g1	8.22908	2.57e-54	6.83e-51	UP	TRINITY_DN2891_c0_g1	TraesCS6A01G181700.1	1	793	795	0	TraesCS6A01G181700	chr6A	208383858	208384740	Heat shock protein
	TRINITY_DN414_c0_g1	7.85459	4.72e-54	1.21e-50	UP	TRINITY_DN414_c0_g1	TraesCS6D01G322300.1	419	540	540	1.57e-53	TraesCS6D01G322300	chr6D	429383365	429383997	Heat-shock protein, putative
	TRINITY_DN133181_c4_g1	13.361	2.64e-53	6.59e-50	UP	TRINITY_DN133181_c4_g1	TraesCS5A01G383800.1	931	741	1119	5.41e-85	TraesCS5A01G383800	chr5A	581487008	581488298	Heat shock transcription factor
	TRINITY_DN28505_c0_g3	13.5278	4.62e-53	1.12e-49	UP	NA	NA	NA	NA	NA	NA	NA	NA	NA	NA	NA
	TRINITY_DN4941_c0_g1	12.9878	6.59e-53	1.55e-49	UP	TRINITY_DN4941_c0_g1	TraesCS2A01G312900.1	1	660	660	0	TraesCS2A01G312900	chr2A	537456162	537456821	Heat-shock protein, putative
	TRINITY_DN30471_c0_g1	7.00608	7.89e-53	1.8e-49	UP	TRINITY_DN30471_c0_g1	TraesCS1B01G139500.1	2214	2294	2499	1.56e-35	TraesCS1B01G139500	chr1B	183478959	183484632	70 kDa heat shock protein
	TRINITY_DN1603_c1_g2	10.5243	8.9e-53	1.93e-49	UP	TRINITY_DN1603_c1_g2	TraesCSU01G194600.1	355	456	456	3.95e-35	TraesCSU01G194600	chrUn	291905673	291906521	Heat shock protein
	TRINITY_DN34031_c0_g1	7.38588	8.92e-53	1.93e-49	UP	TRINITY_DN34031_c0_g1	TraesCS3A01G113100.1	139	480	480	2.35e-160	TraesCS3A01G113100	chr3A	80413047	80413827	Heat shock protein
	TRINITY_DN15566_c0_g1	13.2117	1.31e-52	2.76e-49	UP	TRINITY_DN15566_c0_g1	TraesCS4B01G380800.1	1407	1474	2928	2.97e-28	TraesCS4B01G380800	chr4B	660723123	660728928	ATP-dependent chaperone ClpB
	TRINITY_DN77260_c0_g1	14.7216	2.92e-51	5.86e-48	UP	TRINITY_DN77260_c0_g1	TraesCS4B01G225400.1	485	692	732	3.57e-101	TraesCS4B01G225400	chr4B	471956428	471957605	Heat shock protein
	TRINITY_DN6473_c0_g1	8.90947	2.92e-51	5.86e-48	UP	TRINITY_DN6473_c0_g1	TraesCS3D01G273600.1	1541	1921	2742	0	TraesCS3D01G273600	chr3D	379536248	379539614	Chaperone clpb, putative
	TRINITY_DN14477_c0_g1	13.0595	1.12e-50	2.19e-47	UP	TRINITY_DN14477_c0_g1	TraesCS4B01G243400.1	1	82	1743	4.93e-36	TraesCS4B01G243400	chr4B	504934572	504936314	Heat shock 70 kDa protein
	TRINITY_DN8393_c1_g1	7.88866	5.34e-50	1.02e-46	UP	TRINITY_DN8393_c1_g1	TraesCS3D01G045500.1	349	456	456	1.48e-50	TraesCS3D01G045500	chr3D	17391738	17392193	Heat shock protein
	TRINITY_DN26392_c0_g2	7.30165	7.41e-50	1.39e-46	UP	TRINITY_DN26392_c0_g2	TraesCS4B01G211600.1	156	474	474	2.47e-151	TraesCS4B01G211600	chr4B	449928126	449929253	Heat-shock protein
	TRINITY_DN1603_c2_g1	12.0281	1.87e-49	3.42e-46	UP	TRINITY_DN1603_c2_g1	TraesCS3D01G045800.1	396	459	459	4.23e-17	TraesCS3D01G045800	chr3D	17433235	17433693	Heat shock protein
	TRINITY_DN13845_c0_g1	8.79861	2.5e-49	4.47e-46	UP	TRINITY_DN13845_c0_g1	TraesCS3B01G131300.1	300	489	489	1.6e-95	TraesCS3B01G131300	chr3B	113512069	113512557	Heat-shock protein, putative
	TRINITY_DN1603_c1_g1	14.3447	2.69e-49	4.7e-46	UP	TRINITY_DN1603_c1_g1	TraesCS3D01G046700.1	394	456	456	6.78e-24	TraesCS3D01G046700	chr3D	17591725	17592180	Heat shock protein
	TRINITY_DN36949_c0_g2	11.6729	6.06e-49	1.04e-45	UP	TRINITY_DN36949_c0_g2	TraesCS2A01G524600.1	1	582	582	2.95e-165	TraesCS2A01G524600	chr2A	745388709	745389290	Ethylene-responsive transcription factor, putative
	TRINITY_DN1983_c3_g1	14.6457	7.98e-49	1.34e-45	UP	NA	NA	NA	NA	NA	NA	NA	NA	NA	NA	NA
	TRINITY_DN23156_c0_g1	13.947	9.96e-49	1.64e-45	UP	NA	NA	NA	NA	NA	NA	NA	NA	NA	NA	NA
	TRINITY_DN6554_c0_g1	14.6908	1.41e-48	2.27e-45	UP	TRINITY_DN6554_c0_g1	TraesCSU01G047300.1	3	190	621	2.7e-43	TraesCSU01G047300	chrUn	37338311	37338931	Heat shock protein
	TRINITY_DN426_c0_g1	7.1627	4.12e-48	6.51e-45	UP	TRINITY_DN426_c0_g1	TraesCS5A01G548000.1	8	2251	2523	0	TraesCS5A01G548000	chr5A	702165549	702169903	BAG family molecular chaperone regulator 6
	TRINITY_DN853_c0_g1	11.9934	5.37e-48	8.34e-45	UP	TRINITY_DN853_c0_g1	TraesCS4A01G092600.1	331	468	468	8.15e-65	TraesCS4A01G092600	chr4A	99913715	99914182	Heat-shock protein
	TRINITY_DN14168_c1_g1	7.88388	6.67e-48	1.02e-44	UP	TRINITY_DN14168_c1_g1	TraesCS4D01G212300.1	1	61	474	3.18e-24	TraesCS4D01G212300	chr4D	365217434	365218278	Heat shock protein
	TRINITY_DN835_c0_g1	13.4788	9.29e-48	1.39e-44	UP	TRINITY_DN835_c0_g1	TraesCS4D01G213100.1	1	156	474	3.87e-57	TraesCS4D01G213100	chr4D	365864520	365864993	Heat-shock protein, putative
	TRINITY_DN22892_c1_g1	8.85642	1.24e-47	1.82e-44	UP	TRINITY_DN22892_c1_g1	TraesCS7B01G388700.3	2681	2914	3954	1.42e-120	TraesCS7B01G388700	chr7B	654949049	654953437	BAG family molecular chaperone regulator 6
	TRINITY_DN6497_c0_g1	13.3278	3.11e-47	4.49e-44	UP	NA	NA	NA	NA	NA	NA	NA	NA	NA	NA	NA
	TRINITY_DN102758_c0_g1	12.716	1e-46	1.42e-43	UP	TRINITY_DN102758_c0_g1	TraesCS4D01G059000.1	566	703	1740	9.97e-64	TraesCS4D01G059000	chr4D	35119279	35121323	ethylene-dependent gravitropism-deficient and yellow-green-like 2
	TRINITY_DN2397_c0_g1	6.01255	1.13e-46	1.58e-43	UP	TRINITY_DN2397_c0_g1	TraesCS1D01G284000.1	211	283	1845	2.49e-30	TraesCS1D01G284000	chr1D	382234639	382237640	70 kDa heat shock protein
	TRINITY_DN9325_c0_g1	6.49003	1.51e-46	2.08e-43	UP	TRINITY_DN9325_c0_g1	TraesCS1A01G340100.1	1964	2075	2757	1.29e-52	TraesCS1A01G340100	chr1A	530257362	530260422	ATP-dependent chaperone ClpB
	TRINITY_DN6476_c1_g2	12.7236	3.94e-46	5.31e-43	UP	NA	NA	NA	NA	NA	NA	NA	NA	NA	NA	NA
	TRINITY_DN30292_c0_g1	13.5126	5.87e-46	7.8e-43	UP	NA	NA	NA	NA	NA	NA	NA	NA	NA	NA	NA
	TRINITY_DN89874_c0_g1	17.4595	8.92e-46	1.17e-42	UP	TRINITY_DN89874_c0_g1	TraesCS3A01G034500.1	78	282	456	1.63e-99	TraesCS3A01G034500	chr3A	19466930	19467666	Heat shock protein
	TRINITY_DN31617_c0_g2	7.58169	9.29e-46	1.19e-42	UP	TRINITY_DN31617_c0_g2	TraesCS5D01G434100.1	464	531	1266	2.52e-28	TraesCS5D01G434100	chr5D	489774687	489777095	Chaperone protein dnaJ, putative
	TRINITY_DN17149_c0_g2	15.0562	1.35e-45	1.71e-42	UP	NA	NA	NA	NA	NA	NA	NA	NA	NA	NA	NA
	TRINITY_DN70221_c0_g2	5.66288	1.89e-45	2.36e-42	UP	TRINITY_DN70221_c0_g2	TraesCS6A01G410800.1	1	209	1215	1.58e-96	TraesCS6A01G410800	chr6A	613771831	613774318	BAG family molecular chaperone regulator 5
	TRINITY_DN9498_c0_g1	6.94836	1.98e-45	2.43e-42	UP	TRINITY_DN9498_c0_g1	TraesCS1D01G342100.1	1964	2054	2757	5.81e-41	TraesCS1D01G342100	chr1D	431826446	431829513	ATP-dependent chaperone ClpB
	TRINITY_DN14821_c0_g1	7.92212	2.21e-45	2.67e-42	UP	TRINITY_DN14821_c0_g1	TraesCS2D01G276000.1	1269	1367	1653	1.77e-45	TraesCS2D01G276000	chr2D	345623985	345626820	Peptidylprolyl isomerase
	TRINITY_DN14165_c0_g1	7.67986	2.47e-45	2.95e-42	UP	TRINITY_DN14165_c0_g1	TraesCS4D01G206600.1	737	1239	1974	0	TraesCS4D01G206600	chr4D	354136050	354138155	70 kDa heat shock protein
	TRINITY_DN6139_c0_g2	9.83069	3.81e-45	4.48e-42	UP	TRINITY_DN6139_c0_g2	TraesCS3D01G351900.1	1752	1959	1959	5.67e-90	TraesCS3D01G351900	chr3D	462850049	462852773	70 kDa heat shock protein
	TRINITY_DN1551_c0_g1	6.52911	4.83e-45	5.6e-42	UP	TRINITY_DN1551_c0_g1	TraesCS6B01G456600.1	1	1215	1215	0	TraesCS6B01G456600	chr6B	712674678	712676160	BAG family molecular chaperone regulator 5
	TRINITY_DN76973_c0_g1	8.91056	1.09e-44	1.25e-41	UP	TRINITY_DN76973_c0_g1	TraesCS6B01G187500.1	123	197	1128	2.13e-31	TraesCS6B01G187500	chr6B	214025798	214028666	Phosphoglycerate kinase
	TRINITY_DN25334_c0_g1	7.61233	1.28e-44	1.44e-41	UP	TRINITY_DN25334_c0_g1	TraesCS3A01G274500.1	1284	1159	1284	2.73e-48	TraesCS3A01G274500	chr3A	503753941	503755224	syntaxin of plants 73
	TRINITY_DN301_c0_g1	12.9879	1.36e-44	1.51e-41	UP	TRINITY_DN301_c0_g1	TraesCS7B01G267300.1	322	1062	1062	0	TraesCS7B01G267300	chr7B	490432075	490433223	Heat shock transcription factor
	TRINITY_DN63461_c0_g1	8.0805	1.7e-44	1.86e-41	UP	TRINITY_DN63461_c0_g1	TraesCS4D01G059000.1	1034	1231	1740	6.26e-97	TraesCS4D01G059000	chr4D	35119279	35121323	ethylene-dependent gravitropism-deficient and yellow-green-like 2
	TRINITY_DN24737_c0_g1	8.59681	1.09e-43	1.18e-40	UP	TRINITY_DN24737_c0_g1	TraesCS3A01G274400.1	239	687	2742	0	TraesCS3A01G274400	chr3A	503751786	503755145	Chaperone clpb, putative
	TRINITY_DN426_c1_g1	7.75265	1.13e-43	1.21e-40	UP	TRINITY_DN426_c1_g1	TraesCS4D01G357900.1	858	1195	3855	7.07e-175	TraesCS4D01G357900	chr4D	505999122	506003500	BAG family molecular chaperone regulator 6
	TRINITY_DN35080_c0_g1	6.15942	1.43e-43	1.51e-40	UP	TRINITY_DN35080_c0_g1	TraesCS5A01G548000.3	2556	3308	3933	0	TraesCS5A01G548000	chr5A	702165549	702169903	BAG family molecular chaperone regulator 6
	TRINITY_DN4776_c0_g1	6.70252	1.87e-43	1.95e-40	UP	TRINITY_DN4776_c0_g1	TraesCS3D01G115100.1	1	119	480	6.93e-55	TraesCS3D01G115100	chr3D	68389095	68389856	Heat shock protein
	TRINITY_DN8393_c4_g1	9.79852	2.11e-43	2.18e-40	UP	TRINITY_DN8393_c4_g1	TraesCS3D01G045500.1	355	72	456	1.33e-146	TraesCS3D01G045500	chr3D	17391738	17392193	Heat shock protein
	TRINITY_DN8340_c1_g2	8.61429	2.71e-43	2.76e-40	UP	TRINITY_DN8340_c1_g2	TraesCS3B01G406100.1	293	465	465	2.53e-86	TraesCS3B01G406100	chr3B	641666585	641667049	Ferredoxin
	TRINITY_DN26538_c1_g1	9.98715	3.04e-43	3.05e-40	UP	NA	NA	NA	NA	NA	NA	NA	NA	NA	NA	NA
	TRINITY_DN17251_c0_g1	10.0154	4.52e-43	4.46e-40	UP	TRINITY_DN17251_c0_g1	TraesCS3D01G045500.1	257	456	456	2.62e-93	TraesCS3D01G045500	chr3D	17391738	17392193	Heat shock protein
	TRINITY_DN77260_c1_g1	14.7054	4.55e-43	4.46e-40	UP	TRINITY_DN77260_c1_g1	TraesCS4D01G226000.1	717	443	717	1.23e-132	TraesCS4D01G226000	chr4D	384975222	384976356	Heat shock protein
	TRINITY_DN19747_c1_g1	15.7702	6e-43	5.8e-40	UP	NA	NA	NA	NA	NA	NA	NA	NA	NA	NA	NA
	TRINITY_DN84051_c0_g1	7.204	7.44e-43	7.11e-40	UP	TRINITY_DN84051_c0_g1	TraesCS3A01G113000.1	432	489	489	1.48e-22	TraesCS3A01G113000	chr3A	80288788	80289478	Heat-shock protein, putative
	TRINITY_DN9202_c0_g1	8.63099	1.34e-42	1.27e-39	UP	TRINITY_DN9202_c0_g1	TraesCS5D01G305500.1	96	197	1827	5.98e-42	TraesCS5D01G305500	chr5D	400295411	400297237	Heat shock 70 kDa protein
	TRINITY_DN29395_c0_g1	14.3915	6.38e-42	5.97e-39	UP	NA	NA	NA	NA	NA	NA	NA	NA	NA	NA	NA
	TRINITY_DN39762_c0_g1	6.63731	7.5e-42	6.93e-39	UP	TRINITY_DN39762_c0_g1	TraesCS3D01G114800.1	260	489	489	2.53e-108	TraesCS3D01G114800	chr3D	68273803	68274291	Heat-shock protein, putative
	TRINITY_DN5643_c0_g1	6.32694	8.14e-42	7.44e-39	UP	TRINITY_DN5643_c0_g1	TraesCS6B01G374100.1	1	533	537	0	TraesCS6B01G374100	chr6B	646946222	646946873	Heat-shock protein, putative
	TRINITY_DN51115_c0_g1	6.3671	8.93e-42	8.08e-39	UP	TRINITY_DN51115_c0_g1	TraesCS1B01G352400.1	1351	1563	2754	2.81e-107	TraesCS1B01G352400	chr1B	583207824	583210883	ATP-dependent chaperone ClpB
	TRINITY_DN14624_c0_g1	7.2758	1.18e-41	1.06e-38	UP	NA	NA	NA	NA	NA	NA	NA	NA	NA	NA	NA
	TRINITY_DN4010_c0_g1	7.23752	1.47e-41	1.3e-38	UP	TRINITY_DN4010_c0_g1	TraesCS3D01G273600.1	1	2742	2742	0	TraesCS3D01G273600	chr3D	379536248	379539614	Chaperone clpb, putative
	TRINITY_DN19637_c0_g1	7.93661	1.75e-41	1.53e-38	UP	NA	NA	NA	NA	NA	NA	NA	NA	NA	NA	NA
	TRINITY_DN220_c0_g1	9.07423	3.8e-41	3.29e-38	UP	NA	NA	NA	NA	NA	NA	NA	NA	NA	NA	NA
	TRINITY_DN17144_c0_g1	7.87745	6.51e-41	5.58e-38	UP	TRINITY_DN17144_c0_g1	TraesCS1A01G440000.1	1	594	594	0	TraesCS1A01G440000	chr1A	589113474	589114067	GH3.3
	TRINITY_DN112513_c0_g1	9.03982	9.84e-41	8.34e-38	UP	TRINITY_DN112513_c0_g1	TraesCS1B01G151300.1	1443	1655	2061	5.16e-102	TraesCS1B01G151300	chr1B	236957822	236963066	Chaperone DnaK
	TRINITY_DN6288_c0_g1	6.38803	1.03e-40	8.62e-38	UP	TRINITY_DN6288_c0_g1	TraesCS1D01G131800.1	1190	1254	2049	1.08e-26	TraesCS1D01G131800	chr1D	155728817	155734791	Chaperone DnaK
	TRINITY_DN119081_c0_g1	7.04456	1.54e-40	1.28e-37	UP	TRINITY_DN119081_c0_g1	TraesCS2B01G272900.1	518	697	786	9.78e-89	TraesCS2B01G272900	chr2B	374207787	374209500	Photosystem II 10 kDa polypeptide family protein
	TRINITY_DN14497_c0_g1	12.9351	2.84e-40	2.34e-37	UP	TRINITY_DN14497_c0_g1	TraesCS4B01G380800.1	637	697	2928	3.34e-24	TraesCS4B01G380800	chr4B	660723123	660728928	ATP-dependent chaperone ClpB
	TRINITY_DN8393_c5_g1	12.8058	3.63e-40	2.96e-37	UP	TRINITY_DN8393_c5_g1	TraesCS4A01G092100.1	281	355	477	2.69e-25	TraesCS4A01G092100	chr4A	98785516	98785992	Heat-shock protein, putative
	TRINITY_DN4776_c0_g2	8.37532	5.5e-40	4.43e-37	UP	TRINITY_DN4776_c0_g2	TraesCS4D01G145500.1	1	164	489	2.69e-78	TraesCS4D01G145500	chr4D	134549769	134550477	Heat shock protein
	TRINITY_DN6554_c0_g2	9.67697	6e-40	4.76e-37	UP	TRINITY_DN6554_c0_g2	TraesCSU01G047300.1	1	393	621	6.86e-142	TraesCSU01G047300	chrUn	37338311	37338931	Heat shock protein
	TRINITY_DN26873_c0_g3	5.78825	6.02e-40	4.76e-37	UP	TRINITY_DN26873_c0_g3	TraesCS6B01G346700.1	648	411	648	2.28e-119	TraesCS6B01G346700	chr6B	610808780	610809552	Heat-shock protein, putative
	TRINITY_DN67836_c0_g2	6.3879	6.24e-40	4.89e-37	UP	TRINITY_DN67836_c0_g2	TraesCS2B01G294500.1	1602	1764	1764	6.47e-81	TraesCS2B01G294500	chr2B	411140591	411143398	Peptidylprolyl isomerase
	TRINITY_DN133181_c0_g1	6.84614	6.95e-40	5.39e-37	UP	TRINITY_DN133181_c0_g1	TraesCS5D01G393200.1	319	593	1134	5.95e-140	TraesCS5D01G393200	chr5D	461439693	461440998	Heat shock transcription factor
	TRINITY_DN22791_c0_g1	10.2893	7.76e-40	5.97e-37	UP	NA	NA	NA	NA	NA	NA	NA	NA	NA	NA	NA
	TRINITY_DN3422_c1_g3	12.3917	9.04e-40	6.88e-37	UP	NA	NA	NA	NA	NA	NA	NA	NA	NA	NA	NA
	TRINITY_DN3852_c2_g1	7.08319	9.13e-40	6.89e-37	UP	TRINITY_DN3852_c2_g1	TraesCS1B01G139500.1	1466	1522	2499	4.72e-17	TraesCS1B01G139500	chr1B	183478959	183484632	70 kDa heat shock protein
	TRINITY_DN126_c0_g1	7.83294	1.05e-39	7.83e-37	UP	TRINITY_DN126_c0_g1	TraesCS4D01G213100.1	346	474	474	8.61e-60	TraesCS4D01G213100	chr4D	365864520	365864993	Heat-shock protein, putative
	TRINITY_DN16806_c0_g1	6.20484	1.1e-39	8.15e-37	UP	TRINITY_DN16806_c0_g1	TraesCS7D01G440200.1	143	237	885	5.66e-41	TraesCS7D01G440200	chr7D	560248214	560250603	Phosphosulfolactate synthase-related protein
	TRINITY_DN42770_c0_g2	12.2394	1.35e-39	9.9e-37	UP	NA	NA	NA	NA	NA	NA	NA	NA	NA	NA	NA
	TRINITY_DN24388_c0_g1	7.03952	1.46e-39	1.06e-36	UP	TRINITY_DN24388_c0_g1	TraesCS3D01G273600.1	572	1120	2742	0	TraesCS3D01G273600	chr3D	379536248	379539614	Chaperone clpb, putative
	TRINITY_DN13076_c0_g1	12.9845	1.9e-39	1.37e-36	UP	NA	NA	NA	NA	NA	NA	NA	NA	NA	NA	NA
	TRINITY_DN84071_c1_g1	13.8371	2.64e-39	1.89e-36	UP	TRINITY_DN84071_c1_g1	TraesCS7A01G264400.1	1626	1668	1890	2.13e-14	TraesCS7A01G264400	chr7A	263714673	263727769	Receptor protein kinase, putative
	TRINITY_DN22791_c0_g3	8.38801	4.48e-39	3.18e-36	UP	NA	NA	NA	NA	NA	NA	NA	NA	NA	NA	NA
	TRINITY_DN12551_c0_g1	6.22043	6.68e-39	4.7e-36	UP	TRINITY_DN12551_c0_g1	TraesCS6D01G295500.2	1	648	648	0	TraesCS6D01G295500	chr6D	406334688	406335462	Heat-shock protein, putative
	TRINITY_DN8393_c6_g1	17.8942	7.98e-39	5.56e-36	UP	TRINITY_DN8393_c6_g1	TraesCS4D01G212500.1	1	214	468	8.07e-108	TraesCS4D01G212500	chr4D	365506981	365507656	Heat-shock protein
	TRINITY_DN16652_c0_g1	7.55864	8.16e-39	5.64e-36	UP	TRINITY_DN16652_c0_g1	TraesCS3A01G113000.1	1	232	489	4.14e-104	TraesCS3A01G113000	chr3A	80288788	80289478	Heat-shock protein, putative
	TRINITY_DN14061_c0_g1	6.94251	8.43e-39	5.78e-36	UP	TRINITY_DN14061_c0_g1	TraesCS2A01G033700.1	278	567	2124	1.71e-144	TraesCS2A01G033700	chr2A	15001869	15004471	Heat shock protein 90
	TRINITY_DN334_c0_g2	8.1181	9.07e-39	6.17e-36	UP	TRINITY_DN334_c0_g2	TraesCS4D01G012500.1	262	91	321	7.32e-85	TraesCS4D01G012500	chr4D	5784698	5785018	Dehydrin family protein, expressed
	TRINITY_DN1603_c0_g1	7.43122	1.12e-38	7.58e-36	UP	TRINITY_DN1603_c0_g1	TraesCS4D01G213100.1	1	469	474	0	TraesCS4D01G213100	chr4D	365864520	365864993	Heat-shock protein, putative
	TRINITY_DN19054_c0_g1	10.247	1.34e-38	8.98e-36	UP	TRINITY_DN19054_c0_g1	TraesCS3D01G274400.1	1	138	1056	7.36e-38	TraesCS3D01G274400	chr3D	380479289	380485957	Transferase family protein
	TRINITY_DN15834_c0_g2	17.3232	1.44e-38	9.55e-36	UP	TRINITY_DN15834_c0_g2	TraesCS7A01G360400.1	1	214	1077	2.44e-99	TraesCS7A01G360400	chr7A	533995324	533996694	Heat shock transcription factor family protein
	TRINITY_DN133181_c3_g1	8.323	1.58e-38	1.04e-35	UP	TRINITY_DN133181_c3_g1	TraesCS5A01G383800.1	524	373	1119	3.86e-67	TraesCS5A01G383800	chr5A	581487008	581488298	Heat shock transcription factor
	TRINITY_DN7472_c0_g2	10.1498	1.61e-38	1.05e-35	UP	NA	NA	NA	NA	NA	NA	NA	NA	NA	NA	NA
	TRINITY_DN225459_c0_g1	8.68248	1.75e-38	1.13e-35	UP	NA	NA	NA	NA	NA	NA	NA	NA	NA	NA	NA
	TRINITY_DN12630_c0_g1	10.9063	2.07e-38	1.33e-35	UP	NA	NA	NA	NA	NA	NA	NA	NA	NA	NA	NA
	TRINITY_DN19686_c1_g1	6.29785	2.89e-38	1.84e-35	UP	NA	NA	NA	NA	NA	NA	NA	NA	NA	NA	NA
	TRINITY_DN17108_c0_g1	8.40199	3.78e-38	2.39e-35	UP	NA	NA	NA	NA	NA	NA	NA	NA	NA	NA	NA
	TRINITY_DN9992_c0_g1	5.39796	4.08e-38	2.56e-35	UP	TRINITY_DN9992_c0_g1	TraesCS7A01G242200.1	480	549	2103	8.88e-29	TraesCS7A01G242200	chr7A	217555694	217559742	Heat shock protein 90
	TRINITY_DN426_c2_g1	6.30611	4.75e-38	2.96e-35	UP	TRINITY_DN426_c2_g1	TraesCS5A01G548000.3	2384	2663	3933	2.2e-134	TraesCS5A01G548000	chr5A	702165549	702169903	BAG family molecular chaperone regulator 6
	TRINITY_DN5934_c0_g1	6.30957	5.62e-38	3.48e-35	UP	TRINITY_DN5934_c0_g1	TraesCS3D01G114900.1	404	489	489	2.75e-37	TraesCS3D01G114900	chr3D	68325091	68325579	Heat-shock protein, putative
	TRINITY_DN6554_c0_g3	10.9728	1.07e-37	6.55e-35	UP	TRINITY_DN6554_c0_g3	TraesCSU01G047300.1	199	1	621	4.23e-67	TraesCSU01G047300	chrUn	37338311	37338931	Heat shock protein
	TRINITY_DN19294_c0_g1	5.77207	1.44e-37	8.8e-35	UP	TRINITY_DN19294_c0_g1	TraesCS5A01G426100.1	55	153	1266	3.15e-43	TraesCS5A01G426100	chr5A	611339340	611341842	Chaperone protein dnaJ, putative
	TRINITY_DN30854_c0_g2	12.713	1.89e-37	1.14e-34	UP	NA	NA	NA	NA	NA	NA	NA	NA	NA	NA	NA
	TRINITY_DN692_c1_g1	10.0973	1.97e-37	1.18e-34	UP	TRINITY_DN692_c1_g1	TraesCS2B01G230600.1	1607	1434	2094	2.53e-82	TraesCS2B01G230600	chr2B	226688033	226702270	Phospholipid-transporting ATPase
	TRINITY_DN35628_c0_g1	6.99924	2.01e-37	1.2e-34	UP	TRINITY_DN35628_c0_g1	TraesCS2A01G386800.1	1269	1330	1734	6.75e-25	TraesCS2A01G386800	chr2A	632604588	632607489	Hsp70-Hsp90 organizing protein 1
	TRINITY_DN16652_c0_g2	6.16424	2.11e-37	1.25e-34	UP	TRINITY_DN16652_c0_g2	TraesCS4D01G145600.1	181	1	489	4.45e-91	TraesCS4D01G145600	chr4D	134563191	134563966	Heat shock protein
	TRINITY_DN13566_c2_g1	12.9184	3.45e-37	2.03e-34	UP	TRINITY_DN13566_c2_g1	TraesCS5A01G548000.1	605	385	2523	1.12e-106	TraesCS5A01G548000	chr5A	702165549	702169903	BAG family molecular chaperone regulator 6
	TRINITY_DN509_c0_g1	9.56038	5.36e-37	3.13e-34	UP	TRINITY_DN509_c0_g1	TraesCSU01G131300.1	1015	1087	2916	9.5e-26	TraesCSU01G131300	chrUn	110792543	110798430	ATP-dependent chaperone ClpB
	TRINITY_DN14156_c0_g1	6.25582	5.68e-37	3.29e-34	UP	TRINITY_DN14156_c0_g1	TraesCS5A01G260600.1	67	127	1899	3.04e-24	TraesCS5A01G260600	chr5A	474541564	474544822	Heat shock protein 90
	TRINITY_DN2856_c0_g1	5.93253	6.96e-37	4e-34	UP	TRINITY_DN2856_c0_g1	TraesCS5A01G547300.1	237	461	2925	6.77e-115	TraesCS5A01G547300	chr5A	701070086	701075789	ATP-dependent chaperone ClpB
	TRINITY_DN4451_c0_g1	7.11577	8.19e-37	4.68e-34	UP	TRINITY_DN4451_c0_g1	TraesCS4A01G061700.1	347	464	489	1.12e-55	TraesCS4A01G061700	chr4A	58552089	58558186	Non-symbiotic hemoglobin
	TRINITY_DN81932_c1_g1	5.72048	1.36e-36	7.73e-34	UP	NA	NA	NA	NA	NA	NA	NA	NA	NA	NA	NA
	TRINITY_DN15287_c6_g1	12.1404	1.38e-36	7.75e-34	UP	NA	NA	NA	NA	NA	NA	NA	NA	NA	NA	NA
	TRINITY_DN26082_c0_g1	7.11689	1.65e-36	9.26e-34	UP	TRINITY_DN26082_c0_g1	TraesCS4D01G357900.1	1734	1966	3855	2.43e-118	TraesCS4D01G357900	chr4D	505999122	506003500	BAG family molecular chaperone regulator 6
	TRINITY_DN59654_c0_g2	7.27743	1.95e-36	1.08e-33	UP	TRINITY_DN59654_c0_g2	TraesCS7D01G190700.2	323	445	957	3.15e-57	TraesCS7D01G190700	chr7D	146104669	146106776	Nuclear migration protein nudC
	TRINITY_DN19099_c0_g3	12.1935	2.19e-36	1.21e-33	UP	TRINITY_DN19099_c0_g3	TraesCS2A01G203300.1	672	722	2094	9.2e-19	TraesCS2A01G203300	chr2A	179278800	179298601	Phospholipid-transporting ATPase
	TRINITY_DN1268_c0_g1	8.83179	2.69e-36	1.48e-33	UP	TRINITY_DN1268_c0_g1	TraesCS4A01G226700.1	1	747	747	0	TraesCS4A01G226700	chr4A	534811309	534812238	Heat-shock protein, putative
	TRINITY_DN6476_c2_g1	6.84498	4.05e-36	2.21e-33	UP	TRINITY_DN6476_c2_g1	TraesCS3B01G130500.1	460	489	489	3.17e-07	TraesCS3B01G130500	chr3B	112835317	112836128	Heat shock protein
	TRINITY_DN16280_c0_g1	4.91693	4.25e-36	2.3e-33	UP	TRINITY_DN16280_c0_g1	TraesCS7D01G440200.1	548	776	885	2.99e-102	TraesCS7D01G440200	chr7D	560248214	560250603	Phosphosulfolactate synthase-related protein
	TRINITY_DN1205_c0_g1	7.76111	4.48e-36	2.41e-33	UP	TRINITY_DN1205_c0_g1	TraesCS5D01G393200.1	993	1134	1134	2.24e-67	TraesCS5D01G393200	chr5D	461439693	461440998	Heat shock transcription factor
	TRINITY_DN93662_c2_g1	6.13632	4.58e-36	2.45e-33	UP	TRINITY_DN93662_c2_g1	TraesCS5A01G548000.2	3726	3936	3936	3.28e-107	TraesCS5A01G548000	chr5A	702165549	702169903	BAG family molecular chaperone regulator 6
	TRINITY_DN1299_c0_g1	5.9632	5.12e-36	2.72e-33	UP	TRINITY_DN1299_c0_g1	TraesCS1D01G424500.1	1	426	426	0	TraesCS1D01G424500	chr1D	478819630	478820055	Programmed cell death protein 4
	TRINITY_DN16121_c0_g1	7.75269	8.97e-36	4.73e-33	UP	NA	NA	NA	NA	NA	NA	NA	NA	NA	NA	NA
	TRINITY_DN15062_c0_g1	8.40199	9.37e-36	4.91e-33	UP	TRINITY_DN15062_c0_g1	TraesCS4D01G357900.1	1464	1701	3855	8.67e-123	TraesCS4D01G357900	chr4D	505999122	506003500	BAG family molecular chaperone regulator 6
	TRINITY_DN4776_c0_g4	6.93503	9.56e-36	4.98e-33	UP	TRINITY_DN4776_c0_g4	TraesCS3D01G115100.1	251	1	480	6.58e-57	TraesCS3D01G115100	chr3D	68389095	68389856	Heat shock protein
	TRINITY_DN31066_c3_g1	12.0199	1.29e-35	6.69e-33	UP	NA	NA	NA	NA	NA	NA	NA	NA	NA	NA	NA
	TRINITY_DN12927_c0_g1	7.64765	1.47e-35	7.56e-33	UP	NA	NA	NA	NA	NA	NA	NA	NA	NA	NA	NA
	TRINITY_DN2883_c0_g1	5.759	1.94e-35	9.93e-33	UP	TRINITY_DN2883_c0_g1	TraesCS7A01G159500.1	340	651	651	3.99e-161	TraesCS7A01G159500	chr7A	115867523	115868629	Chaperone protein dnaJ
	TRINITY_DN51283_c0_g1	6.41691	2.13e-35	1.08e-32	UP	TRINITY_DN51283_c0_g1	TraesCS2B01G294500.1	234	375	1764	1.28e-62	TraesCS2B01G294500	chr2B	411140591	411143398	Peptidylprolyl isomerase
	TRINITY_DN3424_c0_g1	8.48011	2.22e-35	1.12e-32	UP	TRINITY_DN3424_c0_g1	TraesCS4B01G213300.1	1	1096	1098	0	TraesCS4B01G213300	chr4B	451811242	451812339	Retrotransposon protein, putative, Ty1-copia subclass
	TRINITY_DN6476_c1_g1	10.6862	3.25e-35	1.63e-32	UP	NA	NA	NA	NA	NA	NA	NA	NA	NA	NA	NA
	TRINITY_DN16650_c0_g1	5.77663	3.27e-35	1.63e-32	UP	TRINITY_DN16650_c0_g1	TraesCS7B01G094500.1	752	840	963	2.64e-38	TraesCS7B01G094500	chr7B	108284083	108286257	Nuclear migration protein nudC
	TRINITY_DN976_c1_g1	10.2729	6.34e-35	3.14e-32	UP	TRINITY_DN976_c1_g1	TraesCS6B01G420200.1	1	200	1038	5.71e-95	TraesCS6B01G420200	chr6B	691782272	691783993	Cinnamoyl CoA reductase
	TRINITY_DN7924_c0_g1	7.14019	7.36e-35	3.62e-32	UP	TRINITY_DN7924_c0_g1	TraesCS4D01G357900.1	1380	1053	3855	5.4e-161	TraesCS4D01G357900	chr4D	505999122	506003500	BAG family molecular chaperone regulator 6
	TRINITY_DN106393_c0_g1	11.8677	8.02e-35	3.93e-32	UP	TRINITY_DN106393_c0_g1	TraesCS4B01G380800.1	397	464	2928	1.44e-26	TraesCS4B01G380800	chr4B	660723123	660728928	ATP-dependent chaperone ClpB
	TRINITY_DN7924_c0_g3	7.1395	8.22e-35	3.99e-32	UP	TRINITY_DN7924_c0_g3	TraesCS4D01G357900.1	651	960	3855	1.1e-162	TraesCS4D01G357900	chr4D	505999122	506003500	BAG family molecular chaperone regulator 6
	TRINITY_DN13657_c0_g3	11.938	8.25e-35	3.99e-32	UP	NA	NA	NA	NA	NA	NA	NA	NA	NA	NA	NA
	TRINITY_DN6541_c1_g1	14.4272	8.61e-35	4.14e-32	UP	TRINITY_DN6541_c1_g1	TraesCS4B01G038900.1	1	265	1149	1.12e-137	TraesCS4B01G038900	chr4B	27865711	27867090	Pre-mRNA-splicing factor 18
	TRINITY_DN1190_c0_g1	7.33553	1.5e-34	7.18e-32	UP	TRINITY_DN1190_c0_g1	TraesCS2A01G109800.1	232	585	585	0	TraesCS2A01G109800	chr2A	61488106	61488797	Ethylene-responsive transcription factor
	TRINITY_DN28700_c0_g2	6.49401	1.66e-34	7.89e-32	UP	TRINITY_DN28700_c0_g2	TraesCS5B01G272900.1	406	544	681	1.22e-67	TraesCS5B01G272900	chr5B	458390688	458391604	DBH-like monooxygenase protein 2
	TRINITY_DN4476_c1_g2	12.3508	2.22e-34	1.05e-31	UP	TRINITY_DN4476_c1_g2	TraesCS2B01G127800.1	1	184	606	1.23e-92	TraesCS2B01G127800	chr2B	95796218	95796941	Ethylene-responsive transcription factor
	TRINITY_DN6139_c0_g3	6.72792	3.19e-34	1.5e-31	UP	NA	NA	NA	NA	NA	NA	NA	NA	NA	NA	NA
	TRINITY_DN42770_c0_g1	6.51159	4.54e-34	2.12e-31	UP	NA	NA	NA	NA	NA	NA	NA	NA	NA	NA	NA
	TRINITY_DN3660_c0_g1	5.95829	5.44e-34	2.53e-31	UP	TRINITY_DN3660_c0_g1	TraesCS7B01G259000.1	1	471	471	0	TraesCS7B01G259000	chr7B	479529985	479530455	Multiprotein-bridging factor, putative
	TRINITY_DN2867_c0_g1	6.26881	6.04e-34	2.79e-31	UP	TRINITY_DN2867_c0_g1	TraesCS2A01G532500.1	1	438	438	5.95e-155	TraesCS2A01G532500	chr2A	748824880	748825317	Wound-responsive family protein
	TRINITY_DN15765_c0_g1	7.77853	7.44e-34	3.42e-31	UP	NA	NA	NA	NA	NA	NA	NA	NA	NA	NA	NA
	TRINITY_DN13003_c2_g1	13.4976	9.09e-34	4.15e-31	UP	NA	NA	NA	NA	NA	NA	NA	NA	NA	NA	NA
	TRINITY_DN1596_c0_g1	6.22268	1.11e-33	5.06e-31	UP	TRINITY_DN1596_c0_g1	TraesCS3D01G467500.1	1	932	1212	0	TraesCS3D01G467500	chr3D	570328433	570329644	Eukaryotic aspartyl protease family protein
	TRINITY_DN2891_c0_g2	12.7213	1.15e-33	5.19e-31	UP	TRINITY_DN2891_c0_g2	TraesCS6B01G210600.1	758	526	783	2.33e-114	TraesCS6B01G210600	chr6B	278151141	278152007	Heat shock protein
	TRINITY_DN3766_c1_g1	6.1131	1.15e-33	5.19e-31	UP	TRINITY_DN3766_c1_g1	TraesCS5A01G314600.1	208	615	615	0	TraesCS5A01G314600	chr5A	525025891	525026586	Ethylene-responsive transcription factor
	TRINITY_DN15062_c0_g2	8.55454	1.39e-33	6.19e-31	UP	TRINITY_DN15062_c0_g2	TraesCS7B01G388700.1	1726	1369	3873	0	TraesCS7B01G388700	chr7B	654949049	654953437	BAG family molecular chaperone regulator 6
	TRINITY_DN15091_c0_g2	6.51726	1.43e-33	6.36e-31	UP	TRINITY_DN15091_c0_g2	TraesCS4A01G092100.1	1	128	477	8.9e-60	TraesCS4A01G092100	chr4A	98785516	98785992	Heat-shock protein, putative
	TRINITY_DN429_c0_g1	5.08972	1.52e-33	6.74e-31	UP	TRINITY_DN429_c0_g1	TraesCS1A01G146300.1	841	1	1128	0	TraesCS1A01G146300	chr1A	252509644	252511052	Retrovirus-related Pol polyprotein from transposon TNT 1-94
	TRINITY_DN16483_c2_g1	12.737	1.93e-33	8.48e-31	UP	TRINITY_DN16483_c2_g1	TraesCS3B01G515100.1	546	853	1230	1.41e-161	TraesCS3B01G515100	chr3B	757708041	757709406	Basic 7S globulin
	TRINITY_DN7924_c0_g2	7.75718	1.96e-33	8.57e-31	UP	TRINITY_DN7924_c0_g2	TraesCS7B01G388700.1	891	1563	3873	0	TraesCS7B01G388700	chr7B	654949049	654953437	BAG family molecular chaperone regulator 6
	TRINITY_DN21223_c0_g1	7.93588	2e-33	8.72e-31	UP	TRINITY_DN21223_c0_g1	TraesCS4A01G177500.1	36	143	1395	9.06e-49	TraesCS4A01G177500	chr4A	449266176	449268195	Ribulose bisphosphate carboxylase/oxygenase activase
	TRINITY_DN3936_c1_g1	8.02477	2.05e-33	8.89e-31	UP	NA	NA	NA	NA	NA	NA	NA	NA	NA	NA	NA
	TRINITY_DN56702_c2_g1	12.5683	2.83e-33	1.22e-30	UP	NA	NA	NA	NA	NA	NA	NA	NA	NA	NA	NA
	TRINITY_DN36949_c3_g1	6.12146	2.96e-33	1.27e-30	UP	NA	NA	NA	NA	NA	NA	NA	NA	NA	NA	NA
	TRINITY_DN414_c0_g2	6.12126	3.03e-33	1.29e-30	UP	TRINITY_DN414_c0_g2	TraesCS6D01G322300.1	419	540	540	8.65e-54	TraesCS6D01G322300	chr6D	429383365	429383997	Heat-shock protein, putative
	TRINITY_DN12920_c1_g1	8.55603	3.11e-33	1.32e-30	UP	TRINITY_DN12920_c1_g1	TraesCS4A01G098600.1	485	756	2010	1.27e-136	TraesCS4A01G098600	chr4A	110636564	110639356	70 kDa heat shock protein
	TRINITY_DN313_c0_g1	7.15057	3.26e-33	1.38e-30	UP	TRINITY_DN313_c0_g1	TraesCS5D01G266000.1	220	744	744	0	TraesCS5D01G266000	chr5D	370310980	370311837	Heat shock protein, putative
	TRINITY_DN4010_c2_g1	7.36404	3.37e-33	1.41e-30	UP	TRINITY_DN4010_c2_g1	TraesCS3A01G274500.1	1284	899	1284	0	TraesCS3A01G274500	chr3A	503753941	503755224	syntaxin of plants 73
	TRINITY_DN39999_c1_g1	6.50184	3.62e-33	1.51e-30	UP	TRINITY_DN39999_c1_g1	TraesCS4B01G059400.1	726	798	801	1.1e-26	TraesCS4B01G059400	chr4B	50725324	50728143	transmembrane protein
	TRINITY_DN1827_c0_g1	5.59567	3.63e-33	1.51e-30	UP	TRINITY_DN1827_c0_g1	TraesCS5B01G272900.1	1	411	681	0	TraesCS5B01G272900	chr5B	458390688	458391604	DBH-like monooxygenase protein 2
	TRINITY_DN19706_c0_g1	9.19171	4.83e-33	2e-30	UP	TRINITY_DN19706_c0_g1	TraesCS5A01G547300.1	1093	1178	2925	1.63e-37	TraesCS5A01G547300	chr5A	701070086	701075789	ATP-dependent chaperone ClpB
	TRINITY_DN36415_c0_g1	8.24128	6.28e-33	2.58e-30	UP	TRINITY_DN36415_c0_g1	TraesCS1D01G316600.1	708	326	708	0	TraesCS1D01G316600	chr1D	411730535	411731242	Tyrosine N-monooxygenase
	TRINITY_DN2262_c0_g2	9.50112	8.15e-33	3.33e-30	UP	NA	NA	NA	NA	NA	NA	NA	NA	NA	NA	NA
	TRINITY_DN202456_c0_g1	12.3669	9.76e-33	3.98e-30	UP	NA	NA	NA	NA	NA	NA	NA	NA	NA	NA	NA
	TRINITY_DN4339_c0_g1	6.9847	1.19e-32	4.79e-30	UP	TRINITY_DN4339_c0_g1	TraesCS7A01G551200.1	1	676	816	0	TraesCS7A01G551200	chr7A	724963683	724965711	Ser/Thr-rich protein T10 in DGCR region
	TRINITY_DN26392_c0_g1	5.35391	1.25e-32	5.02e-30	UP	TRINITY_DN26392_c0_g1	TraesCS4D01G212400.1	147	477	477	2.49e-167	TraesCS4D01G212400	chr4D	365399007	365399483	Heat-shock protein
	TRINITY_DN5165_c0_g1	6.19454	1.28e-32	5.11e-30	UP	TRINITY_DN5165_c0_g1	TraesCS6B01G410100.1	1	882	882	0	TraesCS6B01G410100	chr6B	684385993	684388823	Methyltransferase-like protein
	TRINITY_DN18616_c0_g1	8.12107	1.32e-32	5.25e-30	UP	TRINITY_DN18616_c0_g1	TraesCS3A01G274400.1	2029	2303	2742	2.75e-143	TraesCS3A01G274400	chr3A	503751786	503755145	Chaperone clpb, putative
	TRINITY_DN27262_c0_g2	5.7018	1.36e-32	5.38e-30	UP	NA	NA	NA	NA	NA	NA	NA	NA	NA	NA	NA
	TRINITY_DN126_c0_g3	6.66875	1.47e-32	5.78e-30	UP	TRINITY_DN126_c0_g3	TraesCS2A01G485700.2	1	61	2250	1.16e-17	TraesCS2A01G485700	chr2A	721104305	721107040	Serine/threonine-protein kinase
	TRINITY_DN2137_c0_g1	8.55297	1.99e-32	7.78e-30	UP	NA	NA	NA	NA	NA	NA	NA	NA	NA	NA	NA
	TRINITY_DN5770_c0_g1	4.86056	2.34e-32	9.13e-30	UP	TRINITY_DN5770_c0_g1	TraesCS7D01G232600.1	129	379	630	5.49e-110	TraesCS7D01G232600	chr7D	194129502	194130250	Heat-shock protein, putative
	TRINITY_DN14997_c0_g1	8.44285	3.61e-32	1.4e-29	UP	TRINITY_DN14997_c0_g1	TraesCS6B01G058300.1	1	50	1998	6.15e-18	TraesCS6B01G058300	chr6B	38763526	38767358	Heat shock 70 kDa protein
	TRINITY_DN2534_c0_g1	8.59591	6.37e-32	2.46e-29	UP	TRINITY_DN2534_c0_g1	TraesCS2A01G117600.1	702	572	1404	2.13e-62	TraesCS2A01G117600	chr2A	67969846	67979486	Ankyrin repeat protein-like
	TRINITY_DN11891_c0_g2	8.8572	6.81e-32	2.62e-29	UP	NA	NA	NA	NA	NA	NA	NA	NA	NA	NA	NA
	TRINITY_DN1654_c1_g1	12.0389	9.65e-32	3.69e-29	UP	NA	NA	NA	NA	NA	NA	NA	NA	NA	NA	NA
	TRINITY_DN528_c0_g1	8.5909	1.08e-31	4.12e-29	UP	TRINITY_DN528_c0_g1	TraesCS2A01G033700.1	1943	2124	2124	5.05e-83	TraesCS2A01G033700	chr2A	15001869	15004471	Heat shock protein 90
	TRINITY_DN14168_c0_g1	6.04476	1.13e-31	4.28e-29	UP	TRINITY_DN14168_c0_g1	TraesCS4B01G212300.1	1	333	468	3.16e-150	TraesCS4B01G212300	chr4B	450685882	450686349	Heat-shock protein, putative
	TRINITY_DN2490_c0_g2	6.65991	1.51e-31	5.68e-29	UP	TRINITY_DN2490_c0_g2	TraesCS1B01G294300.1	146	211	1947	5.41e-27	TraesCS1B01G294300	chr1B	512172902	512175830	70 kDa heat shock protein
	TRINITY_DN32022_c0_g1	7.98557	1.64e-31	6.12e-29	UP	TRINITY_DN32022_c0_g1	TraesCS2D01G033200.1	903	526	2133	0	TraesCS2D01G033200	chr2D	12882738	12885228	Heat shock protein 90
	TRINITY_DN1983_c0_g2	11.762	1.78e-31	6.61e-29	UP	NA	NA	NA	NA	NA	NA	NA	NA	NA	NA	NA
	TRINITY_DN19647_c0_g1	7.60806	2.14e-31	7.94e-29	UP	TRINITY_DN19647_c0_g1	TraesCS2D01G033200.1	1320	1773	2133	0	TraesCS2D01G033200	chr2D	12882738	12885228	Heat shock protein 90
	TRINITY_DN11519_c0_g1	7.24145	2.96e-31	1.09e-28	UP	TRINITY_DN11519_c0_g1	TraesCS3B01G130300.1	205	489	489	8.97e-139	TraesCS3B01G130300	chr3B	112464964	112465703	Heat shock protein
	TRINITY_DN72105_c0_g2	11.6187	3.28e-31	1.2e-28	UP	TRINITY_DN72105_c0_g2	TraesCS4B01G179300.1	326	386	1011	1.83e-24	TraesCS4B01G179300	chr4B	392657973	392659263	Hexosyltransferase
	TRINITY_DN1889_c1_g1	4.72792	3.43e-31	1.25e-28	UP	NA	NA	NA	NA	NA	NA	NA	NA	NA	NA	NA
	TRINITY_DN242_c3_g1	13.1273	4.06e-31	1.48e-28	UP	TRINITY_DN242_c3_g1	TraesCS4B01G106400.1	222	531	1131	5.17e-151	TraesCS4B01G106400	chr4B	115845572	115848000	Alcohol dehydrogenase
	TRINITY_DN2534_c1_g1	8.50823	4.64e-31	1.68e-28	UP	NA	NA	NA	NA	NA	NA	NA	NA	NA	NA	NA
	TRINITY_DN9896_c0_g3	4.58136	4.79e-31	1.73e-28	UP	TRINITY_DN9896_c0_g3	TraesCS3D01G157300.1	142	1	210	2.16e-69	TraesCS3D01G157300	chr3D	125482328	125483973	Cx9C motif-containing protein 4, mitochondrial
	TRINITY_DN17112_c1_g2	8.76686	6.06e-31	2.18e-28	UP	NA	NA	NA	NA	NA	NA	NA	NA	NA	NA	NA
	TRINITY_DN45538_c0_g1	12.4506	6.28e-31	2.24e-28	UP	TRINITY_DN45538_c0_g1	TraesCS6B01G420000.1	1	417	1038	0	TraesCS6B01G420000	chr6B	691632058	691633453	Cinnamoyl CoA reductase
	TRINITY_DN85305_c1_g1	8.91058	6.5e-31	2.31e-28	UP	NA	NA	NA	NA	NA	NA	NA	NA	NA	NA	NA
	TRINITY_DN3496_c0_g1	5.8271	7.98e-31	2.83e-28	UP	NA	NA	NA	NA	NA	NA	NA	NA	NA	NA	NA
	TRINITY_DN144978_c3_g1	11.7448	8e-31	2.83e-28	UP	TRINITY_DN144978_c3_g1	TraesCS6B01G456700.1	420	675	804	9.4e-123	TraesCS6B01G456700	chr6B	712803225	712804028	BAG family molecular chaperone regulator 5
	TRINITY_DN11509_c0_g2	9.42827	8.72e-31	3.06e-28	UP	TRINITY_DN11509_c0_g2	TraesCS4A01G005600.1	951	753	951	8.87e-97	TraesCS4A01G005600	chr4A	3370277	3371723	Ethylene-responsive transcription factor
	TRINITY_DN948_c0_g1	6.37604	1e-30	3.5e-28	UP	TRINITY_DN948_c0_g1	TraesCS1D01G342100.1	2589	2757	2757	6.15e-81	TraesCS1D01G342100	chr1D	431826446	431829513	ATP-dependent chaperone ClpB
	TRINITY_DN34384_c0_g1	7.86747	1.21e-30	4.23e-28	UP	TRINITY_DN34384_c0_g1	TraesCS4D01G292100.1	376	429	600	2.61e-10	TraesCS4D01G292100	chr4D	463401506	463402105	Membrane lipoprotein, putative
	TRINITY_DN19185_c0_g1	5.79105	1.32e-30	4.59e-28	UP	TRINITY_DN19185_c0_g1	TraesCS2A01G386800.1	1492	1622	1734	2.68e-61	TraesCS2A01G386800	chr2A	632604588	632607489	Hsp70-Hsp90 organizing protein 1
	TRINITY_DN45074_c0_g1	6.83299	1.77e-30	6.13e-28	UP	TRINITY_DN45074_c0_g1	TraesCS1A01G416700.1	366	1	438	0	TraesCS1A01G416700	chr1A	574938084	574938521	Programmed cell death protein 4
	TRINITY_DN7915_c0_g1	11.8367	2.38e-30	8.19e-28	UP	NA	NA	NA	NA	NA	NA	NA	NA	NA	NA	NA
	TRINITY_DN242_c3_g2	11.9616	2.63e-30	9e-28	UP	TRINITY_DN242_c3_g2	TraesCS1B01G389200.1	460	673	1140	1.76e-89	TraesCS1B01G389200	chr1B	622706636	622708876	Alcohol dehydrogenase
	TRINITY_DN67836_c0_g1	5.82092	2.96e-30	1.01e-27	UP	TRINITY_DN67836_c0_g1	TraesCS2D01G276000.1	1653	1431	1653	1.06e-112	TraesCS2D01G276000	chr2D	345623985	345626820	Peptidylprolyl isomerase
	TRINITY_DN54620_c1_g1	6.80503	3.1e-30	1.05e-27	UP	TRINITY_DN54620_c1_g1	TraesCS3B01G087400.1	323	390	762	5.1e-28	TraesCS3B01G087400	chr3B	55456681	55459679	Triosephosphate isomerase
	TRINITY_DN36505_c0_g1	5.59745	3.5e-30	1.18e-27	UP	TRINITY_DN36505_c0_g1	TraesCS6B01G187500.1	715	781	1128	2.49e-24	TraesCS6B01G187500	chr6B	214025798	214028666	Phosphoglycerate kinase
	TRINITY_DN8393_c2_g1	10.026	4.31e-30	1.45e-27	UP	TRINITY_DN8393_c2_g1	TraesCSU01G047300.1	1	290	621	2.47e-74	TraesCSU01G047300	chrUn	37338311	37338931	Heat shock protein
	TRINITY_DN7472_c0_g1	7.8302	5.36e-30	1.8e-27	UP	NA	NA	NA	NA	NA	NA	NA	NA	NA	NA	NA
	TRINITY_DN7351_c0_g1	8.90686	5.69e-30	1.9e-27	UP	TRINITY_DN7351_c0_g1	TraesCS5D01G138700.1	69	133	303	1.27e-15	TraesCS5D01G138700	chr5D	220754227	220755842	disease resistance protein (TIR-NBS-LRR class) family
	TRINITY_DN10719_c0_g2	12.4215	7.1e-30	2.37e-27	UP	TRINITY_DN10719_c0_g2	TraesCS4B01G114400.1	1	63	1164	1.05e-14	TraesCS4B01G114400	chr4B	129524890	129526053	Anthranilate synthase alpha subunit 2, chloroplastic
	TRINITY_DN30746_c0_g1	11.6161	7.76e-30	2.57e-27	UP	NA	NA	NA	NA	NA	NA	NA	NA	NA	NA	NA
	TRINITY_DN43642_c0_g2	6.65209	7.87e-30	2.6e-27	UP	TRINITY_DN43642_c0_g2	TraesCS6A01G384300.1	5	98	843	2.54e-39	TraesCS6A01G384300	chr6A	602814931	602816001	PPPDE thiol peptidase family protein, putative
	TRINITY_DN638_c0_g1	6.95201	1.16e-29	3.82e-27	UP	TRINITY_DN638_c0_g1	TraesCS4B01G059500.2	1	1740	1740	0	TraesCS4B01G059500	chr4B	50729404	50731461	ethylene-dependent gravitropism-deficient and yellow-green-like 2
	TRINITY_DN4407_c0_g2	8.31742	1.26e-29	4.13e-27	UP	NA	NA	NA	NA	NA	NA	NA	NA	NA	NA	NA
	TRINITY_DN5643_c0_g2	6.81851	1.44e-29	4.71e-27	UP	TRINITY_DN5643_c0_g2	TraesCS6B01G374100.1	372	27	537	1.57e-166	TraesCS6B01G374100	chr6B	646946222	646946873	Heat-shock protein, putative
	TRINITY_DN22892_c0_g1	8.05299	1.65e-29	5.36e-27	UP	TRINITY_DN22892_c0_g1	TraesCS7B01G388700.1	2455	2674	3873	2.09e-112	TraesCS7B01G388700	chr7B	654949049	654953437	BAG family molecular chaperone regulator 6
	TRINITY_DN16236_c0_g1	7.33677	1.76e-29	5.71e-27	UP	TRINITY_DN16236_c0_g1	TraesCS2A01G058100.1	193	1	924	3.81e-96	TraesCS2A01G058100	chr2A	24363959	24364882	Acidic chitinase
	TRINITY_DN22892_c0_g3	7.41412	2.22e-29	7.16e-27	UP	TRINITY_DN22892_c0_g3	TraesCS4D01G357900.1	2080	2263	3855	1.34e-92	TraesCS4D01G357900	chr4D	505999122	506003500	BAG family molecular chaperone regulator 6
	TRINITY_DN3408_c1_g1	6.04436	2.41e-29	7.75e-27	UP	TRINITY_DN3408_c1_g1	TraesCS4A01G119400.1	187	502	510	5.85e-156	TraesCS4A01G119400	chr4A	147445223	147445980	Universal stress protein family protein, expressed
	TRINITY_DN59338_c0_g2	9.33816	2.78e-29	8.91e-27	UP	TRINITY_DN59338_c0_g2	TraesCS7A01G161000.1	422	494	744	1.16e-21	TraesCS7A01G161000	chr7A	117346258	117347900	10 kDa chaperonin
	TRINITY_DN7915_c0_g2	11.727	3.46e-29	1.1e-26	UP	NA	NA	NA	NA	NA	NA	NA	NA	NA	NA	NA
	TRINITY_DN31617_c0_g1	5.27696	3.5e-29	1.11e-26	UP	TRINITY_DN31617_c0_g1	TraesCS5B01G428000.1	394	464	1266	5.71e-30	TraesCS5B01G428000	chr5B	603954037	603956423	Chaperone protein dnaJ, putative
	TRINITY_DN250130_c0_g1	10.2376	3.69e-29	1.17e-26	UP	TRINITY_DN250130_c0_g1	TraesCS2A01G237300.1	532	424	2583	7.91e-50	TraesCS2A01G237300	chr2A	310385021	310424952	Endoplasmic reticulum metallopeptidase 1
	TRINITY_DN39833_c0_g1	11.4068	3.83e-29	1.21e-26	UP	NA	NA	NA	NA	NA	NA	NA	NA	NA	NA	NA
	TRINITY_DN36068_c0_g1	11.667	3.87e-29	1.21e-26	UP	NA	NA	NA	NA	NA	NA	NA	NA	NA	NA	NA
	TRINITY_DN6525_c0_g2	8.28814	4.55e-29	1.42e-26	UP	TRINITY_DN6525_c0_g2	TraesCS3D01G101600.1	2243	2120	2244	1.27e-35	TraesCS3D01G101600	chr3D	54629018	54631361	Leucine-rich repeat receptor-like protein kinase family protein
	TRINITY_DN95631_c0_g1	11.3742	5e-29	1.56e-26	UP	NA	NA	NA	NA	NA	NA	NA	NA	NA	NA	NA
	TRINITY_DN10878_c1_g3	14.8711	5.35e-29	1.66e-26	UP	NA	NA	NA	NA	NA	NA	NA	NA	NA	NA	NA
	TRINITY_DN8503_c0_g1	11.9943	6.22e-29	1.92e-26	UP	TRINITY_DN8503_c0_g1	TraesCS5A01G482400.1	99	161	1146	2.37e-23	TraesCS5A01G482400	chr5A	654086402	654090003	Hsp70 nucleotide exchange factor fes1
	TRINITY_DN27626_c0_g2	4.50654	6.75e-29	2.08e-26	UP	TRINITY_DN27626_c0_g2	TraesCS4A01G091300.1	143	279	939	7.28e-65	TraesCS4A01G091300	chr4A	97874357	97875989	RNA-binding family protein
	TRINITY_DN17157_c0_g1	8.01089	7.7e-29	2.36e-26	UP	TRINITY_DN17157_c0_g1	TraesCS2B01G404400.1	1065	1184	1731	4.16e-57	TraesCS2B01G404400	chr2B	572554778	572557919	Hsp70-Hsp90 organizing protein 1
	TRINITY_DN50728_c0_g1	5.16428	8e-29	2.45e-26	UP	TRINITY_DN50728_c0_g1	TraesCS4B01G380800.1	949	1020	2928	2.09e-30	TraesCS4B01G380800	chr4B	660723123	660728928	ATP-dependent chaperone ClpB
	TRINITY_DN22480_c0_g1	12.9518	1.14e-28	3.48e-26	UP	NA	NA	NA	NA	NA	NA	NA	NA	NA	NA	NA
	TRINITY_DN1842_c0_g1	5.39866	1.21e-28	3.66e-26	UP	NA	NA	NA	NA	NA	NA	NA	NA	NA	NA	NA
	TRINITY_DN9441_c0_g1	7.33963	1.38e-28	4.16e-26	UP	TRINITY_DN9441_c0_g1	TraesCS2D01G182000.1	1	267	267	9.98e-137	TraesCS2D01G182000	chr2D	126899412	126899904	B12D protein
	TRINITY_DN27279_c0_g2	6.53067	1.39e-28	4.2e-26	UP	TRINITY_DN27279_c0_g2	TraesCS1D01G342100.1	2757	2514	2757	1.34e-122	TraesCS1D01G342100	chr1D	431826446	431829513	ATP-dependent chaperone ClpB
	TRINITY_DN12330_c0_g2	5.62794	1.53e-28	4.59e-26	UP	TRINITY_DN12330_c0_g2	TraesCS2D01G033200.1	391	1211	2133	0	TraesCS2D01G033200	chr2D	12882738	12885228	Heat shock protein 90
	TRINITY_DN13029_c0_g2	8.37289	1.54e-28	4.62e-26	UP	TRINITY_DN13029_c0_g2	TraesCS4B01G205700.1	1873	1972	1974	1.29e-45	TraesCS4B01G205700	chr4B	437949085	437951192	70 kDa heat shock protein
	TRINITY_DN91153_c0_g1	13.6806	1.82e-28	5.42e-26	UP	NA	NA	NA	NA	NA	NA	NA	NA	NA	NA	NA
	TRINITY_DN11640_c0_g1	11.8201	2.11e-28	6.28e-26	UP	NA	NA	NA	NA	NA	NA	NA	NA	NA	NA	NA
	TRINITY_DN19933_c0_g2	7.42013	2.22e-28	6.58e-26	UP	TRINITY_DN19933_c0_g2	TraesCS7A01G449300.1	151	369	369	1.88e-108	TraesCS7A01G449300	chr7A	643297089	643297519	6-hydroxynicotinate 3-monooxygenase
	TRINITY_DN6233_c0_g1	9.06451	2.76e-28	8.13e-26	UP	TRINITY_DN6233_c0_g1	TraesCS4D01G055500.1	1161	1389	1389	2.52e-117	TraesCS4D01G055500	chr4D	30513828	30515216	Anthocyanin 5-aromatic acyltransferase
	TRINITY_DN678_c0_g1	4.67229	2.79e-28	8.17e-26	UP	TRINITY_DN678_c0_g1	TraesCS6A01G323800.1	1	389	498	0	TraesCS6A01G323800	chr6A	557094125	557094992	Universal stress protein family protein
	TRINITY_DN54548_c1_g1	12.7808	2.79e-28	8.17e-26	UP	NA	NA	NA	NA	NA	NA	NA	NA	NA	NA	NA
	TRINITY_DN58053_c0_g1	11.3248	2.84e-28	8.28e-26	UP	TRINITY_DN58053_c0_g1	TraesCS7B01G066000.1	84	156	732	4.3e-31	TraesCS7B01G066000	chr7B	72018105	72019733	10 kDa chaperonin
	TRINITY_DN80927_c0_g1	15.3611	2.95e-28	8.54e-26	UP	NA	NA	NA	NA	NA	NA	NA	NA	NA	NA	NA
	TRINITY_DN9220_c0_g1	6.23226	2.97e-28	8.57e-26	UP	TRINITY_DN9220_c0_g1	TraesCS5D01G270000.1	1	414	414	0	TraesCS5D01G270000	chr5D	373774151	373774564	Calcium-binding EF-hand family protein-like
	TRINITY_DN8666_c0_g1	5.71741	3e-28	8.64e-26	UP	TRINITY_DN8666_c0_g1	TraesCS2A01G386800.1	7	1734	1734	0	TraesCS2A01G386800	chr2A	632604588	632607489	Hsp70-Hsp90 organizing protein 1
	TRINITY_DN18131_c0_g1	6.2404	3.12e-28	8.94e-26	UP	TRINITY_DN18131_c0_g1	TraesCS5B01G192500.1	1	489	489	0	TraesCS5B01G192500	chr5B	347677510	347677998	Chaperone protein DNAj, putative
	TRINITY_DN13161_c1_g2	8.14297	3.71e-28	1.06e-25	UP	TRINITY_DN13161_c1_g2	TraesCS1B01G072700.1	1351	1406	1533	2.57e-16	TraesCS1B01G072700	chr1B	57104191	57105723	Pentatricopeptide repeat-containing protein
	TRINITY_DN9550_c2_g1	11.3055	3.85e-28	1.1e-25	UP	NA	NA	NA	NA	NA	NA	NA	NA	NA	NA	NA
	TRINITY_DN8393_c4_g2	7.39928	3.86e-28	1.1e-25	UP	TRINITY_DN8393_c4_g2	TraesCS4A01G092600.1	411	93	468	1.15e-147	TraesCS4A01G092600	chr4A	99913715	99914182	Heat-shock protein
	TRINITY_DN1048_c0_g1	6.96202	3.89e-28	1.1e-25	UP	TRINITY_DN1048_c0_g1	TraesCS5B01G478300.1	1	452	468	0	TraesCS5B01G478300	chr5B	650132159	650132721	Wound-induced protease inhibitor
	TRINITY_DN54525_c0_g1	5.93945	3.93e-28	1.11e-25	UP	TRINITY_DN54525_c0_g1	TraesCS1B01G423600.1	170	1	1137	1.49e-69	TraesCS1B01G423600	chr1B	646189334	646191991	Chaperone protein dnaJ
	TRINITY_DN89048_c0_g1	5.49756	4.03e-28	1.13e-25	UP	TRINITY_DN89048_c0_g1	TraesCS5A01G547300.1	1667	2177	2925	0	TraesCS5A01G547300	chr5A	701070086	701075789	ATP-dependent chaperone ClpB
	TRINITY_DN622_c0_g1	11.2392	4.34e-28	1.21e-25	UP	NA	NA	NA	NA	NA	NA	NA	NA	NA	NA	NA
	TRINITY_DN13282_c0_g2	4.58766	5.42e-28	1.51e-25	UP	TRINITY_DN13282_c0_g2	TraesCS6A01G310400.1	243	1	243	2.26e-125	TraesCS6A01G310400	chr6A	546599156	546600237	CDP-diacylglycerol--glycerol-3-phosphate 3-phosphatidyltransferase, putative
	TRINITY_DN485_c0_g2	11.4615	5.51e-28	1.53e-25	UP	TRINITY_DN485_c0_g2	TraesCS2A01G360000.1	417	356	480	4.31e-16	TraesCS2A01G360000	chr2A	603855754	603856938	Cysteine-rich receptor-like protein kinase 41
	TRINITY_DN54355_c0_g1	4.73231	5.71e-28	1.58e-25	UP	TRINITY_DN54355_c0_g1	TraesCS5B01G428000.1	622	741	1266	8.3e-54	TraesCS5B01G428000	chr5B	603954037	603956423	Chaperone protein dnaJ, putative
	TRINITY_DN12123_c0_g1	5.89982	6.28e-28	1.73e-25	UP	TRINITY_DN12123_c0_g1	TraesCS2B01G561600.1	1	303	303	4.41e-140	TraesCS2B01G561600	chr2B	754151966	754152580	Wound-responsive family protein
	TRINITY_DN35328_c1_g1	7.26372	6.77e-28	1.86e-25	UP	TRINITY_DN35328_c1_g1	TraesCS5B01G257000.1	639	345	741	2.28e-149	TraesCS5B01G257000	chr5B	439650507	439651562	Heat shock protein, putative
	TRINITY_DN220_c0_g2	10.6157	7.55e-28	2.06e-25	UP	NA	NA	NA	NA	NA	NA	NA	NA	NA	NA	NA
	TRINITY_DN14388_c0_g1	5.95179	8.6e-28	2.34e-25	UP	TRINITY_DN14388_c0_g1	TraesCS4B01G106400.1	754	1093	1131	2.08e-172	TraesCS4B01G106400	chr4B	115845572	115848000	Alcohol dehydrogenase
	TRINITY_DN2230_c0_g1	5.78961	9.21e-28	2.5e-25	UP	TRINITY_DN2230_c0_g1	TraesCS1B01G423600.1	131	697	1137	0	TraesCS1B01G423600	chr1B	646189334	646191991	Chaperone protein dnaJ
	TRINITY_DN20445_c0_g1	11.4019	9.46e-28	2.56e-25	UP	NA	NA	NA	NA	NA	NA	NA	NA	NA	NA	NA
	TRINITY_DN32956_c0_g1	6.17579	9.84e-28	2.66e-25	UP	NA	NA	NA	NA	NA	NA	NA	NA	NA	NA	NA
	TRINITY_DN80660_c0_g1	6.7386	1.07e-27	2.88e-25	UP	TRINITY_DN80660_c0_g1	TraesCS1A01G120100.3	1168	1266	2298	2.47e-45	TraesCS1A01G120100	chr1A	132481070	132485645	70 kDa heat shock protein
	TRINITY_DN23961_c0_g2	6.05818	1.26e-27	3.39e-25	UP	TRINITY_DN23961_c0_g2	TraesCS7A01G159600.1	70	419	717	7.29e-180	TraesCS7A01G159600	chr7A	115903779	115904909	Chaperone protein dnaJ
	TRINITY_DN10014_c0_g1	6.09666	1.29e-27	3.44e-25	UP	TRINITY_DN10014_c0_g1	TraesCS4B01G205700.1	226	618	1974	0	TraesCS4B01G205700	chr4B	437949085	437951192	70 kDa heat shock protein
	TRINITY_DN2224_c0_g1	6.28342	1.44e-27	3.84e-25	UP	TRINITY_DN2224_c0_g1	TraesCS2A01G394600.1	1	198	198	1.19e-96	TraesCS2A01G394600	chr2A	644308084	644308281	Heparan sulfate 2-O-sulfotransferase 1
	TRINITY_DN14555_c0_g1	12.2894	1.63e-27	4.34e-25	UP	TRINITY_DN14555_c0_g1	TraesCS6A01G381400.1	877	1038	1038	3.57e-80	TraesCS6A01G381400	chr6A	601146836	601148224	Cinnamoyl CoA reductase
	TRINITY_DN14304_c0_g1	4.86556	1.76e-27	4.65e-25	UP	TRINITY_DN14304_c0_g1	TraesCS1D01G284000.1	482	990	1845	0	TraesCS1D01G284000	chr1D	382234639	382237640	70 kDa heat shock protein
	TRINITY_DN852_c1_g2	8.19031	1.78e-27	4.7e-25	UP	TRINITY_DN852_c1_g2	TraesCS5D01G194200.1	246	516	516	1.57e-68	TraesCS5D01G194200	chr5D	298134937	298138059	B3 domain-containing protein
	TRINITY_DN16065_c0_g3	7.20009	2.1e-27	5.52e-25	UP	TRINITY_DN16065_c0_g3	TraesCS3A01G113200.1	293	1	1317	4.8e-152	TraesCS3A01G113200	chr3A	80414465	80419020	Polynucleotide 5'-hydroxyl-kinase NOL9
	TRINITY_DN22082_c0_g1	9.10881	2.13e-27	5.59e-25	UP	NA	NA	NA	NA	NA	NA	NA	NA	NA	NA	NA
	TRINITY_DN14226_c0_g1	5.42977	2.31e-27	6.03e-25	UP	NA	NA	NA	NA	NA	NA	NA	NA	NA	NA	NA
	TRINITY_DN13694_c0_g1	7.68705	2.41e-27	6.27e-25	UP	TRINITY_DN13694_c0_g1	TraesCS3B01G390700.1	707	912	1959	2.13e-103	TraesCS3B01G390700	chr3B	615748962	615751502	70 kDa heat shock protein
	TRINITY_DN20010_c0_g1	6.68646	2.51e-27	6.53e-25	UP	TRINITY_DN20010_c0_g1	TraesCS1A01G120100.3	1805	1875	2298	5.43e-30	TraesCS1A01G120100	chr1A	132481070	132485645	70 kDa heat shock protein
	TRINITY_DN5245_c2_g2	11.335	2.56e-27	6.63e-25	UP	NA	NA	NA	NA	NA	NA	NA	NA	NA	NA	NA
	TRINITY_DN4123_c1_g3	10.5604	2.64e-27	6.82e-25	UP	TRINITY_DN4123_c1_g3	TraesCS6D01G359100.1	1	321	3207	1.7e-150	TraesCS6D01G359100	chr6D	451760853	451764265	Receptor-kinase, putative
	TRINITY_DN4243_c1_g2	16.6586	2.99e-27	7.69e-25	UP	NA	NA	NA	NA	NA	NA	NA	NA	NA	NA	NA
	TRINITY_DN12174_c0_g1	12.865	3.09e-27	7.91e-25	UP	TRINITY_DN12174_c0_g1	TraesCS1B01G389200.1	300	614	1140	1.87e-160	TraesCS1B01G389200	chr1B	622706636	622708876	Alcohol dehydrogenase
	TRINITY_DN5223_c0_g1	8.45028	3.17e-27	8.11e-25	UP	NA	NA	NA	NA	NA	NA	NA	NA	NA	NA	NA
	TRINITY_DN5457_c0_g1	5.82709	3.24e-27	8.25e-25	UP	TRINITY_DN5457_c0_g1	TraesCS1D01G389200.1	1	267	267	5.03e-125	TraesCS1D01G389200	chr1D	460995287	460995553	Avr9/Cf-9 rapidly elicited protein
	TRINITY_DN11388_c1_g1	11.3475	3.32e-27	8.44e-25	UP	NA	NA	NA	NA	NA	NA	NA	NA	NA	NA	NA
	TRINITY_DN42289_c0_g1	13.329	3.36e-27	8.5e-25	UP	NA	NA	NA	NA	NA	NA	NA	NA	NA	NA	NA
	TRINITY_DN71123_c0_g2	8.34614	3.43e-27	8.64e-25	UP	NA	NA	NA	NA	NA	NA	NA	NA	NA	NA	NA
	TRINITY_DN113297_c0_g1	7.64578	3.45e-27	8.68e-25	UP	TRINITY_DN113297_c0_g1	TraesCS1B01G072700.1	1440	1516	1533	7.34e-28	TraesCS1B01G072700	chr1B	57104191	57105723	Pentatricopeptide repeat-containing protein
	TRINITY_DN17108_c0_g3	6.87786	3.65e-27	9.16e-25	UP	NA	NA	NA	NA	NA	NA	NA	NA	NA	NA	NA
	TRINITY_DN35328_c0_g1	7.08262	4.01e-27	1e-24	UP	TRINITY_DN35328_c0_g1	TraesCS5D01G266000.1	220	458	744	5.28e-123	TraesCS5D01G266000	chr5D	370310980	370311837	Heat shock protein, putative
	TRINITY_DN85894_c0_g1	6.41943	4.26e-27	1.06e-24	UP	NA	NA	NA	NA	NA	NA	NA	NA	NA	NA	NA
	TRINITY_DN70937_c0_g1	6.577	4.55e-27	1.13e-24	UP	TRINITY_DN70937_c0_g1	TraesCS1A01G340100.1	1	50	2757	3.84e-18	TraesCS1A01G340100	chr1A	530257362	530260422	ATP-dependent chaperone ClpB
	TRINITY_DN8021_c1_g1	11.7638	5.45e-27	1.35e-24	UP	NA	NA	NA	NA	NA	NA	NA	NA	NA	NA	NA
	TRINITY_DN10336_c0_g1	7.1872	5.93e-27	1.47e-24	UP	TRINITY_DN10336_c0_g1	TraesCS2B01G130500.1	344	516	516	3.62e-76	TraesCS2B01G130500	chr2B	97933152	97933921	Universal stress protein
	TRINITY_DN46963_c0_g1	11.8188	6.18e-27	1.52e-24	UP	TRINITY_DN46963_c0_g1	TraesCS7B01G093300.3	2149	2059	2784	4.35e-41	TraesCS7B01G093300	chr7B	106945174	106949546	Pentatricopeptide repeat-containing protein
	TRINITY_DN23458_c1_g1	13.0405	6.37e-27	1.56e-24	UP	NA	NA	NA	NA	NA	NA	NA	NA	NA	NA	NA
	TRINITY_DN8213_c0_g2	4.36242	6.94e-27	1.7e-24	UP	TRINITY_DN8213_c0_g2	TraesCS2D01G250300.1	1	597	597	0	TraesCS2D01G250300	chr2D	298837437	298838033	Cytidylate kinase
	TRINITY_DN22904_c0_g1	4.74153	7.22e-27	1.76e-24	UP	TRINITY_DN22904_c0_g1	TraesCS7B01G130900.1	1	208	489	1.09e-92	TraesCS7B01G130900	chr7B	157808553	157809166	Heat-shock protein, putative
	TRINITY_DN11974_c0_g1	7.46235	7.55e-27	1.84e-24	UP	TRINITY_DN11974_c0_g1	TraesCS3B01G390700.1	1818	1426	1959	0	TraesCS3B01G390700	chr3B	615748962	615751502	70 kDa heat shock protein
	TRINITY_DN4686_c2_g1	16.1716	8.41e-27	2.04e-24	UP	TRINITY_DN4686_c2_g1	TraesCS7A01G188300.1	2040	1818	2055	1.56e-100	TraesCS7A01G188300	chr7A	144603264	144605405	ATP-dependent zinc metalloprotease FTSH protein
	TRINITY_DN14758_c1_g1	4.51014	8.84e-27	2.14e-24	UP	TRINITY_DN14758_c1_g1	TraesCS1A01G285000.1	177	1	1845	4.12e-82	TraesCS1A01G285000	chr1A	482335991	482338978	70 kDa heat shock protein
	TRINITY_DN242_c0_g1	5.25996	9.11e-27	2.2e-24	UP	TRINITY_DN242_c0_g1	TraesCS4B01G106300.2	149	212	1134	1.16e-23	TraesCS4B01G106300	chr4B	115556448	115559956	Alcohol dehydrogenase
	TRINITY_DN21515_c0_g3	5.60369	9.14e-27	2.2e-24	UP	NA	NA	NA	NA	NA	NA	NA	NA	NA	NA	NA
	TRINITY_DN66043_c0_g2	6.26987	9.34e-27	2.24e-24	UP	TRINITY_DN66043_c0_g2	TraesCS3B01G515100.1	16	317	1230	3.54e-153	TraesCS3B01G515100	chr3B	757708041	757709406	Basic 7S globulin
	TRINITY_DN24717_c1_g2	11.271	9.56e-27	2.29e-24	UP	TRINITY_DN24717_c1_g2	TraesCS2A01G179500.1	380	437	438	3.1e-17	TraesCS2A01G179500	chr2A	138133652	138134089	IgA FC receptor
	TRINITY_DN29907_c0_g1	4.69661	9.88e-27	2.36e-24	UP	TRINITY_DN29907_c0_g1	TraesCS1A01G285000.1	211	415	1845	8.92e-103	TraesCS1A01G285000	chr1A	482335991	482338978	70 kDa heat shock protein
	TRINITY_DN116462_c0_g1	11.1956	1.04e-26	2.46e-24	UP	NA	NA	NA	NA	NA	NA	NA	NA	NA	NA	NA
	TRINITY_DN164_c1_g1	7.93171	1.2e-26	2.83e-24	UP	TRINITY_DN164_c1_g1	TraesCS2A01G203300.1	722	545	2094	3.1e-88	TraesCS2A01G203300	chr2A	179278800	179298601	Phospholipid-transporting ATPase
	TRINITY_DN63908_c0_g1	7.22522	1.42e-26	3.35e-24	UP	TRINITY_DN63908_c0_g1	TraesCS5B01G249000.1	276	450	1614	6.53e-79	TraesCS5B01G249000	chr5B	431074368	431078699	Chaperone protein htpG family protein
	TRINITY_DN16411_c1_g1	13.2523	1.47e-26	3.47e-24	UP	NA	NA	NA	NA	NA	NA	NA	NA	NA	NA	NA
	TRINITY_DN31878_c0_g1	11.7661	1.52e-26	3.56e-24	UP	TRINITY_DN31878_c0_g1	TraesCS5A01G025300.1	719	798	831	1.5e-29	TraesCS5A01G025300	chr5A	19910789	19913367	2-aminoethanethiol dioxygenase
	TRINITY_DN93662_c0_g1	6.08814	1.72e-26	4.04e-24	UP	TRINITY_DN93662_c0_g1	TraesCS5A01G548000.2	3936	3673	3936	1.08e-102	TraesCS5A01G548000	chr5A	702165549	702169903	BAG family molecular chaperone regulator 6
	TRINITY_DN89688_c1_g1	11.3666	1.73e-26	4.05e-24	UP	NA	NA	NA	NA	NA	NA	NA	NA	NA	NA	NA
	TRINITY_DN15705_c0_g1	7.85878	1.76e-26	4.1e-24	UP	TRINITY_DN15705_c0_g1	TraesCS6A01G042600.1	1180	1255	1998	9.71e-33	TraesCS6A01G042600	chr6A	22442891	22446356	Heat shock 70 kDa protein
	TRINITY_DN2863_c0_g1	6.78507	1.84e-26	4.28e-24	UP	TRINITY_DN2863_c0_g1	TraesCS2B01G531300.1	406	531	531	3.3e-60	TraesCS2B01G531300	chr2B	726684952	726686605	Heat-shock protein, putative
	TRINITY_DN1162_c0_g2	12.5457	2.07e-26	4.79e-24	UP	NA	NA	NA	NA	NA	NA	NA	NA	NA	NA	NA
	TRINITY_DN2320_c0_g1	9.10773	2.17e-26	5.01e-24	UP	NA	NA	NA	NA	NA	NA	NA	NA	NA	NA	NA
	TRINITY_DN24823_c0_g1	4.72654	2.96e-26	6.82e-24	UP	TRINITY_DN24823_c0_g1	TraesCS4B01G380800.1	2619	2928	2928	5.59e-151	TraesCS4B01G380800	chr4B	660723123	660728928	ATP-dependent chaperone ClpB
	TRINITY_DN15362_c0_g1	7.91661	3.1e-26	7.13e-24	UP	TRINITY_DN15362_c0_g1	TraesCS7D01G068800.1	803	845	1002	3.49e-14	TraesCS7D01G068800	chr7D	39514541	39517436	Myeloid leukemia factor 1
	TRINITY_DN58791_c0_g1	4.78143	3.59e-26	8.23e-24	UP	TRINITY_DN58791_c0_g1	TraesCS7A01G159500.1	189	1	651	9.29e-94	TraesCS7A01G159500	chr7A	115867523	115868629	Chaperone protein dnaJ
	TRINITY_DN3800_c0_g1	4.27858	4.01e-26	9.17e-24	UP	TRINITY_DN3800_c0_g1	TraesCS5B01G451200.1	1	671	912	0	TraesCS5B01G451200	chr5B	622627647	622631421	OTU domain-containing protein
	TRINITY_DN111791_c2_g1	6.26513	4.27e-26	9.73e-24	UP	TRINITY_DN111791_c2_g1	TraesCS1A01G295600.1	1789	1587	2052	9.64e-102	TraesCS1A01G295600	chr1A	490510109	490524938	Chaperone DnaK
	TRINITY_DN28095_c3_g1	13.6168	4.45e-26	1.01e-23	UP	NA	NA	NA	NA	NA	NA	NA	NA	NA	NA	NA
	TRINITY_DN42836_c0_g1	6.8021	4.45e-26	1.01e-23	UP	TRINITY_DN42836_c0_g1	TraesCS3A01G471800.1	970	1350	1350	0	TraesCS3A01G471800	chr3A	703183355	703184996	Basic 7S globulin 2
	TRINITY_DN39144_c0_g1	5.75324	4.51e-26	1.02e-23	UP	TRINITY_DN39144_c0_g1	TraesCS5B01G023000.1	700	760	891	2.36e-24	TraesCS5B01G023000	chr5B	21411180	21413390	2-aminoethanethiol dioxygenase
	TRINITY_DN1894_c1_g1	11.1133	5.23e-26	1.18e-23	UP	TRINITY_DN1894_c1_g1	TraesCS3B01G231000.1	1	1274	1281	0	TraesCS3B01G231000	chr3B	349223274	349224554	Transposon Ty3-I Gag-Pol polyprotein
	TRINITY_DN38893_c0_g1	4.24441	5.37e-26	1.21e-23	UP	TRINITY_DN38893_c0_g1	TraesCS7D01G160400.1	499	735	735	3.25e-122	TraesCS7D01G160400	chr7D	110791773	110793394	Chaperone protein dnaJ
	TRINITY_DN43642_c0_g1	7.87869	5.88e-26	1.32e-23	UP	TRINITY_DN43642_c0_g1	TraesCS6D01G369300.1	1	98	831	5.49e-41	TraesCS6D01G369300	chr6D	456092952	456094004	PPPDE thiol peptidase family protein, putative
	TRINITY_DN288_c0_g1	4.9916	6.14e-26	1.37e-23	UP	NA	NA	NA	NA	NA	NA	NA	NA	NA	NA	NA
	TRINITY_DN75069_c0_g1	11.9585	6.72e-26	1.5e-23	UP	NA	NA	NA	NA	NA	NA	NA	NA	NA	NA	NA
	TRINITY_DN288_c1_g1	4.08792	7.01e-26	1.56e-23	UP	NA	NA	NA	NA	NA	NA	NA	NA	NA	NA	NA
	TRINITY_DN8666_c0_g2	6.93166	8.36e-26	1.85e-23	UP	TRINITY_DN8666_c0_g2	TraesCS2A01G386800.1	1569	1734	1734	7.1e-79	TraesCS2A01G386800	chr2A	632604588	632607489	Hsp70-Hsp90 organizing protein 1
	TRINITY_DN50797_c0_g1	11.1593	9e-26	1.99e-23	UP	TRINITY_DN50797_c0_g1	TraesCS2A01G071700.1	61	122	888	5.04e-25	TraesCS2A01G071700	chr2A	31911283	31913092	Peroxidase family protein
	TRINITY_DN150042_c0_g1	7.94667	9.49e-26	2.09e-23	UP	TRINITY_DN150042_c0_g1	TraesCS4B01G397600.1	2002	2034	2034	3.77e-08	TraesCS4B01G397600	chr4B	671739110	671743251	Chaperone DnaK
	TRINITY_DN69239_c0_g1	12.2568	1.07e-25	2.35e-23	UP	TRINITY_DN69239_c0_g1	TraesCS3B01G233100.1	1577	1301	1797	2.38e-94	TraesCS3B01G233100	chr3B	360009741	360011537	RNA-directed DNA polymerase (Reverse transcriptase)
	TRINITY_DN4686_c0_g1	14.7455	1.07e-25	2.35e-23	UP	TRINITY_DN4686_c0_g1	TraesCS7A01G188300.1	1973	2055	2055	6.36e-36	TraesCS7A01G188300	chr7A	144603264	144605405	ATP-dependent zinc metalloprotease FTSH protein
	TRINITY_DN17013_c1_g1	5.92404	1.16e-25	2.54e-23	UP	TRINITY_DN17013_c1_g1	TraesCS4D01G287100.1	184	1	276	9.73e-93	TraesCS4D01G287100	chr4D	459060225	459060598	BTB-POZ and MATH domain 4
	TRINITY_DN38126_c1_g1	6.56073	1.32e-25	2.87e-23	UP	TRINITY_DN38126_c1_g1	TraesCS2A01G593000.1	211	271	1545	1.16e-23	TraesCS2A01G593000	chr2A	779818576	779822302	Pyruvate kinase
	TRINITY_DN11184_c0_g1	8.3715	1.33e-25	2.89e-23	UP	NA	NA	NA	NA	NA	NA	NA	NA	NA	NA	NA
	TRINITY_DN90702_c0_g1	4.29412	1.5e-25	3.24e-23	UP	TRINITY_DN90702_c0_g1	TraesCS5A01G482400.1	254	463	1146	2.5e-105	TraesCS5A01G482400	chr5A	654086402	654090003	Hsp70 nucleotide exchange factor fes1
	TRINITY_DN41933_c0_g1	10.383	1.5e-25	3.24e-23	UP	NA	NA	NA	NA	NA	NA	NA	NA	NA	NA	NA
	TRINITY_DN160400_c0_g1	6.29145	1.86e-25	4.02e-23	UP	NA	NA	NA	NA	NA	NA	NA	NA	NA	NA	NA
	TRINITY_DN16466_c1_g1	10.8857	1.91e-25	4.11e-23	UP	TRINITY_DN16466_c1_g1	TraesCS4B01G163100.2	1673	1585	2187	1.79e-35	TraesCS4B01G163100	chr4B	330775209	330793055	Protein transport protein SEC23
	TRINITY_DN2765_c3_g1	7.1573	1.97e-25	4.23e-23	UP	TRINITY_DN2765_c3_g1	TraesCS1A01G120100.1	1128	1172	1686	7.09e-15	TraesCS1A01G120100	chr1A	132481070	132485645	70 kDa heat shock protein
	TRINITY_DN99715_c0_g1	8.20156	2e-25	4.29e-23	UP	NA	NA	NA	NA	NA	NA	NA	NA	NA	NA	NA
	TRINITY_DN2863_c0_g2	4.94904	2.01e-25	4.29e-23	UP	TRINITY_DN2863_c0_g2	TraesCS7D01G179000.1	558	642	642	1.65e-37	TraesCS7D01G179000	chr7D	132135777	132136539	Heat-shock protein, putative
	TRINITY_DN26392_c1_g1	6.07323	2.03e-25	4.32e-23	UP	TRINITY_DN26392_c1_g1	TraesCS4B01G212200.1	382	474	474	2.99e-37	TraesCS4B01G212200	chr4B	450482702	450483365	Heat-shock protein, putative
	TRINITY_DN10132_c0_g1	4.82487	2.29e-25	4.86e-23	UP	NA	NA	NA	NA	NA	NA	NA	NA	NA	NA	NA
	TRINITY_DN26873_c0_g1	6.30906	2.44e-25	5.17e-23	UP	TRINITY_DN26873_c0_g1	TraesCS7B01G083500.1	455	701	702	1.64e-127	TraesCS7B01G083500	chr7B	94263847	94264657	Heat-shock protein, putative
	TRINITY_DN13200_c1_g1	5.56105	2.52e-25	5.32e-23	UP	NA	NA	NA	NA	NA	NA	NA	NA	NA	NA	NA
	TRINITY_DN509_c1_g1	5.23398	3.03e-25	6.39e-23	UP	TRINITY_DN509_c1_g1	TraesCSU01G131300.1	684	2916	2916	0	TraesCSU01G131300	chrUn	110792543	110798430	ATP-dependent chaperone ClpB
	TRINITY_DN19185_c0_g3	5.81344	3.12e-25	6.57e-23	UP	TRINITY_DN19185_c0_g3	TraesCS2A01G386800.1	1614	1335	1734	2.18e-139	TraesCS2A01G386800	chr2A	632604588	632607489	Hsp70-Hsp90 organizing protein 1
	TRINITY_DN34753_c0_g1	5.93322	3.21e-25	6.74e-23	UP	TRINITY_DN34753_c0_g1	TraesCS7A01G177600.1	9	214	648	6.42e-95	TraesCS7A01G177600	chr7A	130891811	130893814	Heat-shock protein, putative
	TRINITY_DN8340_c1_g1	6.48121	3.24e-25	6.78e-23	UP	TRINITY_DN8340_c1_g1	TraesCS1A01G051500.1	4	64	528	2.57e-24	TraesCS1A01G051500	chr1A	33019173	33022461	Prostaglandin E synthase 3
	TRINITY_DN12998_c0_g1	6.5862	3.5e-25	7.31e-23	UP	TRINITY_DN12998_c0_g1	TraesCS5A01G025300.1	226	764	831	0	TraesCS5A01G025300	chr5A	19910789	19913367	2-aminoethanethiol dioxygenase
	TRINITY_DN27062_c0_g1	5.30402	3.89e-25	8.11e-23	UP	TRINITY_DN27062_c0_g1	TraesCS2A01G071700.1	247	364	888	3.5e-54	TraesCS2A01G071700	chr2A	31911283	31913092	Peroxidase family protein
	TRINITY_DN11765_c0_g2	8.26959	4.09e-25	8.5e-23	UP	TRINITY_DN11765_c0_g2	TraesCS6D01G057800.1	1514	1	1518	0	TraesCS6D01G057800	chr6D	27452143	27453660	Cytochrome P450 family protein
	TRINITY_DN89048_c0_g2	5.69028	4.11e-25	8.52e-23	UP	TRINITY_DN89048_c0_g2	TraesCSU01G131300.1	2204	1912	2916	1.35e-151	TraesCSU01G131300	chrUn	110792543	110798430	ATP-dependent chaperone ClpB
	TRINITY_DN9013_c1_g1	8.58186	4.66e-25	9.63e-23	UP	TRINITY_DN9013_c1_g1	TraesCS5A01G384100.1	1	271	750	2.78e-137	TraesCS5A01G384100	chr5A	581926267	581927150	Bax inhibitor-1 family protein
	TRINITY_DN22110_c0_g1	7.78	4.8e-25	9.9e-23	UP	TRINITY_DN22110_c0_g1	TraesCS2B01G053200.1	61	906	906	0	TraesCS2B01G053200	chr2B	26135642	26136547	Acidic chitinase
	TRINITY_DN416_c1_g1	4.62212	5.07e-25	1.04e-22	UP	TRINITY_DN416_c1_g1	TraesCS2D01G162600.1	1	564	564	0	TraesCS2D01G162600	chr2D	106970861	106971424	RING/U-box superfamily protein, putative
	TRINITY_DN347_c1_g1	12.0958	5.56e-25	1.14e-22	UP	NA	NA	NA	NA	NA	NA	NA	NA	NA	NA	NA
	TRINITY_DN53798_c0_g1	12.2544	5.72e-25	1.17e-22	UP	NA	NA	NA	NA	NA	NA	NA	NA	NA	NA	NA
	TRINITY_DN16897_c0_g1	5.12577	6.43e-25	1.31e-22	UP	TRINITY_DN16897_c0_g1	TraesCS7D01G390200.1	1	591	591	0	TraesCS7D01G390200	chr7D	505589148	505589738	TMV response-related protein
	TRINITY_DN2204_c0_g1	4.86705	6.64e-25	1.35e-22	UP	TRINITY_DN2204_c0_g1	TraesCS4D01G209700.1	283	1146	1146	0	TraesCS4D01G209700	chr4D	360953251	360956001	Hsp70 nucleotide exchange factor fes1
	TRINITY_DN23458_c0_g1	12.7875	6.7e-25	1.36e-22	UP	NA	NA	NA	NA	NA	NA	NA	NA	NA	NA	NA
	TRINITY_DN1078_c0_g1	6.91723	7.69e-25	1.56e-22	UP	TRINITY_DN1078_c0_g1	TraesCS2A01G109100.1	1	768	768	0	TraesCS2A01G109100	chr2A	61292139	61293065	Diaminobutyrate--2-oxoglutarate transaminase
	TRINITY_DN488_c0_g1	4.69056	8.11e-25	1.64e-22	UP	TRINITY_DN488_c0_g1	TraesCS5D01G420700.1	3	336	336	1.49e-163	TraesCS5D01G420700	chr5D	481164256	481165387	Chaperone protein dnaJ, putative
	TRINITY_DN30854_c0_g1	7.97845	8.35e-25	1.68e-22	UP	TRINITY_DN30854_c0_g1	TraesCS4D01G243000.1	3	79	1746	3.02e-33	TraesCS4D01G243000	chr4D	405764819	405767712	Heat shock 70 kDa protein
	TRINITY_DN121218_c0_g1	11.52	8.6e-25	1.73e-22	UP	NA	NA	NA	NA	NA	NA	NA	NA	NA	NA	NA
	TRINITY_DN49737_c0_g1	11.0233	9.38e-25	1.88e-22	UP	TRINITY_DN49737_c0_g1	TraesCS3A01G373900.1	284	429	429	1.9e-71	TraesCS3A01G373900	chr3A	623616318	623616746	Ferredoxin
	TRINITY_DN37784_c0_g1	9.84974	1.01e-24	2.03e-22	UP	NA	NA	NA	NA	NA	NA	NA	NA	NA	NA	NA
	TRINITY_DN3636_c0_g1	4.78753	1.02e-24	2.03e-22	UP	TRINITY_DN3636_c0_g1	TraesCS5A01G063000.1	1	297	297	5.3e-155	TraesCS5A01G063000	chr5A	68550629	68551311	ATP-dependent Clp protease proteolytic subunit
	TRINITY_DN19907_c0_g1	4.9026	1.04e-24	2.06e-22	UP	TRINITY_DN19907_c0_g1	TraesCS5B01G152400.1	1	606	606	0	TraesCS5B01G152400	chr5B	281644236	281644841	Calcium-binding protein
	TRINITY_DN12524_c0_g1	4.71704	1.06e-24	2.1e-22	UP	TRINITY_DN12524_c0_g1	TraesCS4A01G202200.1	402	657	1140	9.27e-133	TraesCS4A01G202200	chr4A	491914988	491917720	Alcohol dehydrogenase
	TRINITY_DN17872_c0_g1	5.50846	1.17e-24	2.32e-22	UP	NA	NA	NA	NA	NA	NA	NA	NA	NA	NA	NA
	TRINITY_DN16699_c1_g3	10.975	1.18e-24	2.34e-22	UP	NA	NA	NA	NA	NA	NA	NA	NA	NA	NA	NA
	TRINITY_DN7354_c0_g1	4.95727	1.25e-24	2.45e-22	UP	TRINITY_DN7354_c0_g1	TraesCS1A01G317200.1	1	40	933	5.68e-12	TraesCS1A01G317200	chr1A	508641117	508642831	DCD (Development and cell death) domain protein
	TRINITY_DN5683_c0_g1	4.71905	1.25e-24	2.45e-22	UP	TRINITY_DN5683_c0_g1	TraesCS3A01G116400.1	498	1605	1605	0	TraesCS3A01G116400	chr3A	84649308	84650912	Transcription factor, putative
	TRINITY_DN20950_c0_g3	11.1674	1.29e-24	2.53e-22	UP	TRINITY_DN20950_c0_g3	TraesCS6B01G206300.1	1	1119	1119	0	TraesCS6B01G206300	chr6B	259086311	259087429	Kelch repeat-containing F-box-like
	TRINITY_DN15633_c0_g2	10.859	1.34e-24	2.62e-22	UP	TRINITY_DN15633_c0_g2	TraesCS2B01G331300.1	148	100	570	3.49e-11	TraesCS2B01G331300	chr2B	474909947	474910516	Protein Ycf2
	TRINITY_DN2854_c0_g1	6.37071	1.38e-24	2.7e-22	UP	TRINITY_DN2854_c0_g1	TraesCS2D01G399000.1	214	915	915	0	TraesCS2D01G399000	chr2D	512042264	512043264	Heat shock transcription factor
	TRINITY_DN8599_c0_g1	12.02	1.45e-24	2.82e-22	UP	NA	NA	NA	NA	NA	NA	NA	NA	NA	NA	NA
	TRINITY_DN46129_c1_g2	5.84418	1.49e-24	2.89e-22	UP	NA	NA	NA	NA	NA	NA	NA	NA	NA	NA	NA
	TRINITY_DN9151_c0_g1	10.9452	1.5e-24	2.91e-22	UP	NA	NA	NA	NA	NA	NA	NA	NA	NA	NA	NA
	TRINITY_DN401_c0_g1	5.79831	1.73e-24	3.34e-22	UP	TRINITY_DN401_c0_g1	TraesCS2A01G277100.1	728	1397	1749	0	TraesCS2A01G277100	chr2A	458051107	458053940	Peptidylprolyl isomerase
	TRINITY_DN249790_c0_g1	14.8278	2.23e-24	4.3e-22	UP	NA	NA	NA	NA	NA	NA	NA	NA	NA	NA	NA
	TRINITY_DN26631_c0_g1	6.02111	2.8e-24	5.39e-22	UP	TRINITY_DN26631_c0_g1	TraesCS7D01G068800.1	277	419	1002	7.15e-70	TraesCS7D01G068800	chr7D	39514541	39517436	Myeloid leukemia factor 1
	TRINITY_DN4476_c1_g1	7.73589	2.84e-24	5.44e-22	UP	TRINITY_DN4476_c1_g1	TraesCS2D01G110000.1	1	162	600	1.73e-80	TraesCS2D01G110000	chr2D	61021556	61022267	Ethylene-responsive transcription factor
	TRINITY_DN4228_c0_g1	8.56384	3.14e-24	6.01e-22	UP	NA	NA	NA	NA	NA	NA	NA	NA	NA	NA	NA
	TRINITY_DN35098_c0_g1	7.22881	3.18e-24	6.07e-22	UP	NA	NA	NA	NA	NA	NA	NA	NA	NA	NA	NA
	TRINITY_DN85526_c0_g2	8.32103	3.56e-24	6.78e-22	UP	NA	NA	NA	NA	NA	NA	NA	NA	NA	NA	NA
	TRINITY_DN155701_c0_g1	11.4166	3.9e-24	7.41e-22	UP	NA	NA	NA	NA	NA	NA	NA	NA	NA	NA	NA
	TRINITY_DN288_c0_g3	4.35617	4.45e-24	8.44e-22	UP	NA	NA	NA	NA	NA	NA	NA	NA	NA	NA	NA
	TRINITY_DN8041_c0_g2	5.53615	4.5e-24	8.52e-22	UP	TRINITY_DN8041_c0_g2	TraesCS5A01G231100.1	954	831	954	1.21e-57	TraesCS5A01G231100	chr5A	446605056	446606009	Transmembrane protein 45B
	TRINITY_DN16574_c0_g1	6.05593	4.79e-24	9.03e-22	UP	TRINITY_DN16574_c0_g1	TraesCS6B01G354400.1	1	59	498	1.74e-21	TraesCS6B01G354400	chr6B	620265033	620265871	Universal stress protein family protein
	TRINITY_DN8503_c0_g2	9.58858	5.37e-24	1.01e-21	UP	TRINITY_DN8503_c0_g2	TraesCS5A01G482400.1	99	161	1146	1.37e-25	TraesCS5A01G482400	chr5A	654086402	654090003	Hsp70 nucleotide exchange factor fes1
	TRINITY_DN16981_c0_g1	10.9883	5.63e-24	1.06e-21	UP	NA	NA	NA	NA	NA	NA	NA	NA	NA	NA	NA
	TRINITY_DN22898_c0_g1	10.9011	6.11e-24	1.15e-21	UP	NA	NA	NA	NA	NA	NA	NA	NA	NA	NA	NA
	TRINITY_DN43198_c0_g3	6.28343	6.32e-24	1.18e-21	UP	NA	NA	NA	NA	NA	NA	NA	NA	NA	NA	NA
	TRINITY_DN15104_c0_g1	5.82898	6.73e-24	1.25e-21	UP	TRINITY_DN15104_c0_g1	TraesCS3D01G221100.1	1183	1381	1485	1.71e-100	TraesCS3D01G221100	chr3D	301580319	301585399	Zinc finger protein ZPR1
	TRINITY_DN1010_c3_g1	4.58496	7.02e-24	1.31e-21	UP	TRINITY_DN1010_c3_g1	TraesCS4B01G379800.2	1	746	1149	0	TraesCS4B01G379800	chr4B	660591232	660594196	Man1-Src1p-carboxy-terminal domain protein
	TRINITY_DN11918_c1_g1	3.88012	7.91e-24	1.47e-21	UP	TRINITY_DN11918_c1_g1	TraesCS6D01G209600.1	1	583	711	0	TraesCS6D01G209600	chr6D	296200967	296203842	RNA-binding protein
	TRINITY_DN3019_c0_g1	5.36182	1.12e-23	2.08e-21	UP	NA	NA	NA	NA	NA	NA	NA	NA	NA	NA	NA
	TRINITY_DN232173_c0_g1	5.54588	1.19e-23	2.2e-21	UP	TRINITY_DN232173_c0_g1	TraesCS7B01G023700.1	307	458	459	5.15e-60	TraesCS7B01G023700	chr7B	22732190	22732650	RNA-directed DNA polymerase (reverse transcriptase)-related family protein
	TRINITY_DN25606_c1_g1	8.92777	1.2e-23	2.22e-21	UP	NA	NA	NA	NA	NA	NA	NA	NA	NA	NA	NA
	TRINITY_DN37376_c0_g1	11.2009	1.22e-23	2.25e-21	UP	TRINITY_DN37376_c0_g1	TraesCS4A01G162600.1	1	230	318	3.16e-79	TraesCS4A01G162600	chr4A	358840185	358840615	DNA-directed RNA polymerase subunit beta
	TRINITY_DN3409_c0_g1	6.14158	1.23e-23	2.26e-21	UP	TRINITY_DN3409_c0_g1	TraesCS1A01G199700.1	247	558	561	5.75e-109	TraesCS1A01G199700	chr1A	358922929	358923578	Crossover junction endodeoxyribonuclease RuvC
	TRINITY_DN85284_c0_g3	3.71738	1.25e-23	2.29e-21	UP	TRINITY_DN85284_c0_g3	TraesCS7D01G367500.1	1	225	750	3.4e-112	TraesCS7D01G367500	chr7D	475375095	475375844	ethylene-responsive transcription factor
	TRINITY_DN9145_c0_g1	9.10473	1.36e-23	2.49e-21	UP	NA	NA	NA	NA	NA	NA	NA	NA	NA	NA	NA
	TRINITY_DN4407_c0_g1	9.13152	1.46e-23	2.66e-21	UP	NA	NA	NA	NA	NA	NA	NA	NA	NA	NA	NA
	TRINITY_DN48508_c0_g1	14.2889	1.55e-23	2.82e-21	UP	NA	NA	NA	NA	NA	NA	NA	NA	NA	NA	NA
	TRINITY_DN12478_c0_g1	7.53103	1.58e-23	2.87e-21	UP	TRINITY_DN12478_c0_g1	TraesCSU01G131300.1	446	543	2916	7.66e-45	TraesCSU01G131300	chrUn	110792543	110798430	ATP-dependent chaperone ClpB
	TRINITY_DN25334_c1_g1	6.49407	1.85e-23	3.36e-21	UP	TRINITY_DN25334_c1_g1	TraesCS3A01G274500.1	1029	1284	1284	2.17e-124	TraesCS3A01G274500	chr3A	503753941	503755224	syntaxin of plants 73
	TRINITY_DN74775_c0_g1	4.4825	1.88e-23	3.4e-21	UP	TRINITY_DN74775_c0_g1	TraesCS4D01G021200.1	215	480	708	2.67e-138	TraesCS4D01G021200	chr4D	9183905	9185152	RING finger protein
	TRINITY_DN38089_c1_g1	13.8813	2.02e-23	3.65e-21	UP	TRINITY_DN38089_c1_g1	TraesCS3B01G101200.1	1168	1273	1917	5.19e-36	TraesCS3B01G101200	chr3B	68348282	68356139	Monocopper oxidase-like protein SKU5
	TRINITY_DN64657_c0_g1	10.8291	2.11e-23	3.8e-21	UP	NA	NA	NA	NA	NA	NA	NA	NA	NA	NA	NA
	TRINITY_DN71480_c0_g1	7.5852	2.38e-23	4.27e-21	UP	NA	NA	NA	NA	NA	NA	NA	NA	NA	NA	NA
	TRINITY_DN2615_c2_g1	13.2278	2.42e-23	4.33e-21	UP	TRINITY_DN2615_c2_g1	TraesCS4A01G492700.1	596	636	675	1.25e-10	TraesCS4A01G492700	chr4A	741588190	741588864	Glutaredoxin family protein, expressed
	TRINITY_DN50734_c0_g1	5.10185	2.68e-23	4.78e-21	UP	NA	NA	NA	NA	NA	NA	NA	NA	NA	NA	NA
	TRINITY_DN8138_c0_g3	9.74579	2.71e-23	4.83e-21	UP	TRINITY_DN8138_c0_g3	TraesCS2D01G205300.1	2997	2311	4305	1.24e-86	TraesCS2D01G205300	chr2D	157119913	157124217	Retrovirus-related Pol polyprotein from transposon TNT 1-94
	TRINITY_DN13620_c0_g1	5.01046	2.73e-23	4.84e-21	UP	NA	NA	NA	NA	NA	NA	NA	NA	NA	NA	NA
	TRINITY_DN63328_c1_g1	13.9774	2.79e-23	4.94e-21	UP	NA	NA	NA	NA	NA	NA	NA	NA	NA	NA	NA
	TRINITY_DN60320_c1_g6	6.63662	3.04e-23	5.38e-21	UP	TRINITY_DN60320_c1_g6	TraesCS4B01G158000.1	1890	1386	2592	0	TraesCS4B01G158000	chr4B	302849791	302868730	Nuclear cap-binding protein subunit 1
	TRINITY_DN62077_c0_g2	6.9511	3.09e-23	5.46e-21	UP	TRINITY_DN62077_c0_g2	TraesCS3B01G384800.1	846	642	1377	2.55e-104	TraesCS3B01G384800	chr3B	605014208	605017449	Carboxypeptidase
	TRINITY_DN14887_c0_g2	7.27403	3.13e-23	5.51e-21	UP	TRINITY_DN14887_c0_g2	TraesCS4B01G379800.2	743	804	1149	2.73e-24	TraesCS4B01G379800	chr4B	660591232	660594196	Man1-Src1p-carboxy-terminal domain protein
	TRINITY_DN13404_c0_g1	12.8351	3.33e-23	5.85e-21	UP	NA	NA	NA	NA	NA	NA	NA	NA	NA	NA	NA
	TRINITY_DN7159_c0_g1	10.1569	3.36e-23	5.88e-21	UP	NA	NA	NA	NA	NA	NA	NA	NA	NA	NA	NA
	TRINITY_DN9619_c0_g1	6.90731	3.62e-23	6.33e-21	UP	TRINITY_DN9619_c0_g1	TraesCS7D01G179600.1	1	192	705	1.83e-90	TraesCS7D01G179600	chr7D	133193721	133194791	Heat-shock protein, putative
	TRINITY_DN30234_c2_g2	10.7981	4.61e-23	8.02e-21	UP	NA	NA	NA	NA	NA	NA	NA	NA	NA	NA	NA
	TRINITY_DN41141_c2_g1	6.44499	4.65e-23	8.06e-21	UP	TRINITY_DN41141_c2_g1	TraesCS4D01G003700.1	970	1257	3948	2.24e-60	TraesCS4D01G003700	chr4D	1621299	1626986	Retrotransposon protein, putative, Ty1-copia subclass
	TRINITY_DN12827_c3_g1	11.7278	4.88e-23	8.46e-21	UP	NA	NA	NA	NA	NA	NA	NA	NA	NA	NA	NA
	TRINITY_DN11612_c0_g3	13.8693	4.99e-23	8.62e-21	UP	NA	NA	NA	NA	NA	NA	NA	NA	NA	NA	NA
	TRINITY_DN36908_c2_g1	12.6066	5.15e-23	8.88e-21	UP	TRINITY_DN36908_c2_g1	TraesCS3B01G048600.1	1	465	465	0	TraesCS3B01G048600	chr3B	24558810	24559419	Heat shock protein
	TRINITY_DN25058_c0_g1	6.52042	5.91e-23	1.02e-20	UP	TRINITY_DN25058_c0_g1	TraesCS7A01G202200.1	1	417	417	0	TraesCS7A01G202200	chr7A	163916538	163916954	Heat-shock protein, putative
	TRINITY_DN1162_c0_g1	6.23553	6.15e-23	1.06e-20	UP	TRINITY_DN1162_c0_g1	TraesCS1B01G336600.1	1	2004	2403	0	TraesCS1B01G336600	chr1B	563538986	563541787	Retrovirus-related Pol polyprotein from transposon TNT 1-94
	TRINITY_DN15475_c0_g1	5.81421	6.26e-23	1.07e-20	UP	TRINITY_DN15475_c0_g1	TraesCS2D01G276000.1	567	802	1653	2.42e-118	TraesCS2D01G276000	chr2D	345623985	345626820	Peptidylprolyl isomerase
	TRINITY_DN437_c15_g1	6.30126	6.42e-23	1.1e-20	UP	NA	NA	NA	NA	NA	NA	NA	NA	NA	NA	NA
	TRINITY_DN16483_c0_g1	5.70335	6.49e-23	1.11e-20	UP	TRINITY_DN16483_c0_g1	TraesCS3D01G467300.1	199	491	1212	2.92e-153	TraesCS3D01G467300	chr3D	570281041	570282252	Basic 7S globulin
	TRINITY_DN26298_c0_g2	10.8419	6.59e-23	1.12e-20	UP	NA	NA	NA	NA	NA	NA	NA	NA	NA	NA	NA
	TRINITY_DN18009_c0_g1	4.34312	8.62e-23	1.47e-20	UP	TRINITY_DN18009_c0_g1	TraesCS7A01G242200.1	73	311	2103	2.42e-123	TraesCS7A01G242200	chr7A	217555694	217559742	Heat shock protein 90
	TRINITY_DN39073_c0_g1	11.4564	9.47e-23	1.61e-20	UP	TRINITY_DN39073_c0_g1	TraesCS1B01G065000.1	508	744	924	3.15e-112	TraesCS1B01G065000	chr1B	49429904	49430827	Acidic chitinase
	TRINITY_DN51682_c0_g1	7.86295	1.26e-22	2.14e-20	UP	NA	NA	NA	NA	NA	NA	NA	NA	NA	NA	NA
	TRINITY_DN175026_c0_g1	7.16602	1.29e-22	2.18e-20	UP	NA	NA	NA	NA	NA	NA	NA	NA	NA	NA	NA
	TRINITY_DN5322_c0_g1	9.93639	1.3e-22	2.2e-20	UP	TRINITY_DN5322_c0_g1	TraesCS4A01G492700.1	596	636	675	7.69e-11	TraesCS4A01G492700	chr4A	741588190	741588864	Glutaredoxin family protein, expressed
	TRINITY_DN4049_c0_g1	4.0027	1.34e-22	2.26e-20	UP	TRINITY_DN4049_c0_g1	TraesCS1A01G120100.3	1463	1600	2298	8.94e-64	TraesCS1A01G120100	chr1A	132481070	132485645	70 kDa heat shock protein
	TRINITY_DN30380_c2_g1	7.49737	1.35e-22	2.26e-20	UP	TRINITY_DN30380_c2_g1	TraesCS4B01G140200.1	694	489	1299	3.19e-97	TraesCS4B01G140200	chr4B	184603376	184606429	Ribulose bisphosphate carboxylase/oxygenase activase
	TRINITY_DN12074_c0_g1	7.167	1.74e-22	2.92e-20	UP	NA	NA	NA	NA	NA	NA	NA	NA	NA	NA	NA
	TRINITY_DN3422_c1_g1	4.95817	1.81e-22	3.03e-20	UP	TRINITY_DN3422_c1_g1	TraesCS1A01G285000.1	1682	1845	1845	9.62e-81	TraesCS1A01G285000	chr1A	482335991	482338978	70 kDa heat shock protein
	TRINITY_DN15612_c1_g1	4.93734	1.89e-22	3.15e-20	UP	TRINITY_DN15612_c1_g1	TraesCS2B01G047400.1	1	76	2139	1.11e-30	TraesCS2B01G047400	chr2B	23580771	23583241	Heat shock protein 90
	TRINITY_DN9992_c0_g2	4.59165	1.99e-22	3.32e-20	UP	TRINITY_DN9992_c0_g2	TraesCS7B01G149200.1	547	642	2103	1.54e-41	TraesCS7B01G149200	chr7B	196904882	196908870	Heat shock protein 90
	TRINITY_DN41989_c2_g1	11.214	2.03e-22	3.38e-20	UP	NA	NA	NA	NA	NA	NA	NA	NA	NA	NA	NA
	TRINITY_DN15938_c0_g1	3.97309	2.21e-22	3.67e-20	UP	NA	NA	NA	NA	NA	NA	NA	NA	NA	NA	NA
	TRINITY_DN6332_c0_g1	5.41019	2.38e-22	3.95e-20	UP	TRINITY_DN6332_c0_g1	TraesCS2D01G210300.1	1	219	219	7.57e-108	TraesCS2D01G210300	chr2D	166136857	166137075	Wound-responsive family protein
	TRINITY_DN5333_c0_g1	8.19474	2.52e-22	4.16e-20	UP	NA	NA	NA	NA	NA	NA	NA	NA	NA	NA	NA
	TRINITY_DN42570_c0_g1	11.134	2.57e-22	4.23e-20	UP	TRINITY_DN42570_c0_g1	TraesCS2B01G063900.1	666	726	1917	1.79e-24	TraesCS2B01G063900	chr2B	30494613	30499333	Peptidylprolyl isomerase
	TRINITY_DN32843_c0_g2	7.80184	2.74e-22	4.5e-20	UP	TRINITY_DN32843_c0_g2	TraesCS3D01G346200.1	1119	1229	1371	1.41e-51	TraesCS3D01G346200	chr3D	457403304	457406487	Carboxypeptidase
	TRINITY_DN9393_c0_g1	5.50988	2.95e-22	4.85e-20	UP	NA	NA	NA	NA	NA	NA	NA	NA	NA	NA	NA
	TRINITY_DN23962_c0_g1	7.92909	3.41e-22	5.57e-20	UP	NA	NA	NA	NA	NA	NA	NA	NA	NA	NA	NA
	TRINITY_DN10235_c0_g1	4.85648	3.47e-22	5.66e-20	UP	TRINITY_DN10235_c0_g1	TraesCS7A01G355500.1	132	750	750	0	TraesCS7A01G355500	chr7A	520563404	520564446	ethylene-responsive transcription factor
	TRINITY_DN12803_c1_g2	10.6988	3.56e-22	5.8e-20	UP	NA	NA	NA	NA	NA	NA	NA	NA	NA	NA	NA
	TRINITY_DN22072_c0_g1	13.4249	3.62e-22	5.89e-20	UP	NA	NA	NA	NA	NA	NA	NA	NA	NA	NA	NA
	TRINITY_DN36775_c0_g2	12.2039	3.68e-22	5.97e-20	UP	NA	NA	NA	NA	NA	NA	NA	NA	NA	NA	NA
	TRINITY_DN94705_c0_g1	8.3199	3.81e-22	6.17e-20	UP	TRINITY_DN94705_c0_g1	TraesCS2D01G110000.1	1	320	600	4.32e-163	TraesCS2D01G110000	chr2D	61021556	61022267	Ethylene-responsive transcription factor
	TRINITY_DN10984_c0_g3	4.72765	3.83e-22	6.19e-20	UP	TRINITY_DN10984_c0_g3	TraesCS2D01G502700.3	352	423	423	1.21e-29	TraesCS2D01G502700	chr2D	596252301	596254507	Adenine nucleotide alpha hydrolases-like superfamily protein
	TRINITY_DN19499_c0_g1	5.73503	4.23e-22	6.83e-20	UP	NA	NA	NA	NA	NA	NA	NA	NA	NA	NA	NA
	TRINITY_DN28031_c0_g1	4.30936	4.29e-22	6.9e-20	UP	TRINITY_DN28031_c0_g1	TraesCS1B01G329600.1	703	782	933	2.79e-33	TraesCS1B01G329600	chr1B	555638168	555639909	DCD (Development and cell death) domain protein
	TRINITY_DN24259_c0_g2	4.26269	4.32e-22	6.94e-20	UP	TRINITY_DN24259_c0_g2	TraesCS1D01G284000.1	1	122	1845	4.28e-58	TraesCS1D01G284000	chr1D	382234639	382237640	70 kDa heat shock protein
	TRINITY_DN8569_c0_g1	5.29924	4.81e-22	7.69e-20	UP	TRINITY_DN8569_c0_g1	TraesCS3B01G384800.1	1	557	1377	0	TraesCS3B01G384800	chr3B	605014208	605017449	Carboxypeptidase
	TRINITY_DN2404_c1_g3	9.84229	4.93e-22	7.88e-20	UP	TRINITY_DN2404_c1_g3	TraesCS7B01G249000.1	92	143	330	2.53e-18	TraesCS7B01G249000	chr7B	459804080	459804410	Cytochrome b6-f complex subunit 4
	TRINITY_DN976_c1_g2	11.3439	5.68e-22	9.05e-20	UP	TRINITY_DN976_c1_g2	TraesCS6B01G420200.1	555	1038	1038	0	TraesCS6B01G420200	chr6B	691782272	691783993	Cinnamoyl CoA reductase
	TRINITY_DN51313_c2_g1	12.9487	5.79e-22	9.22e-20	UP	NA	NA	NA	NA	NA	NA	NA	NA	NA	NA	NA
	TRINITY_DN100111_c4_g1	10.9737	5.83e-22	9.26e-20	UP	NA	NA	NA	NA	NA	NA	NA	NA	NA	NA	NA
	TRINITY_DN139419_c0_g1	10.6729	5.92e-22	9.38e-20	UP	TRINITY_DN139419_c0_g1	TraesCS1A01G375600.1	256	49	1089	1.65e-104	TraesCS1A01G375600	chr1A	550311989	550314347	Heat shock transcription factor
	TRINITY_DN24259_c0_g1	3.96208	6.25e-22	9.88e-20	UP	TRINITY_DN24259_c0_g1	TraesCS3B01G390700.1	10	179	1959	1.07e-84	TraesCS3B01G390700	chr3B	615748962	615751502	70 kDa heat shock protein
	TRINITY_DN17820_c0_g1	8.20786	6.26e-22	9.88e-20	UP	TRINITY_DN17820_c0_g1	TraesCS4B01G163100.2	1262	1117	2187	2.82e-70	TraesCS4B01G163100	chr4B	330775209	330793055	Protein transport protein SEC23
	TRINITY_DN24416_c0_g1	11.4327	6.45e-22	1.02e-19	UP	TRINITY_DN24416_c0_g1	TraesCS2A01G093200.1	111	1	237	4.98e-42	TraesCS2A01G093200	chr2A	47349311	47349547	Sarcoplasmic/endoplasmic reticulum calcium ATPase 3
	TRINITY_DN29258_c3_g1	13.8954	6.7e-22	1.05e-19	UP	NA	NA	NA	NA	NA	NA	NA	NA	NA	NA	NA
	TRINITY_DN16606_c2_g1	7.45866	6.87e-22	1.08e-19	UP	NA	NA	NA	NA	NA	NA	NA	NA	NA	NA	NA
	TRINITY_DN223851_c0_g1	12.2489	7.08e-22	1.11e-19	UP	NA	NA	NA	NA	NA	NA	NA	NA	NA	NA	NA
	TRINITY_DN1716_c0_g2	11.3213	7.24e-22	1.13e-19	UP	TRINITY_DN1716_c0_g2	TraesCS2D01G121400.1	395	138	1146	8.79e-29	TraesCS2D01G121400	chr2D	70623057	70625575	CONSTANS-like zinc finger protein
	TRINITY_DN51283_c0_g2	5.39264	7.77e-22	1.21e-19	UP	TRINITY_DN51283_c0_g2	TraesCS2D01G276000.2	269	1	1764	6.26e-135	TraesCS2D01G276000	chr2D	345623985	345626820	Peptidylprolyl isomerase
	TRINITY_DN29422_c0_g1	14.3475	7.94e-22	1.24e-19	UP	NA	NA	NA	NA	NA	NA	NA	NA	NA	NA	NA
	TRINITY_DN11658_c0_g1	6.95283	8.33e-22	1.29e-19	UP	TRINITY_DN11658_c0_g1	TraesCS2D01G057000.1	785	933	933	3.41e-68	TraesCS2D01G057000	chr2D	22767625	22768557	Acidic chitinase
	TRINITY_DN84443_c0_g1	11.2179	8.79e-22	1.36e-19	UP	TRINITY_DN84443_c0_g1	TraesCS1B01G068200.1	130	193	552	1.84e-24	TraesCS1B01G068200	chr1B	53050349	53052389	Prostaglandin E synthase 3
	TRINITY_DN6499_c1_g1	4.8634	8.79e-22	1.36e-19	UP	TRINITY_DN6499_c1_g1	TraesCS7A01G553800.2	1	83	1173	1.6e-36	TraesCS7A01G553800	chr7A	726481932	726485190	MYB-related protein
	TRINITY_DN6638_c0_g1	11.2655	9.82e-22	1.52e-19	UP	TRINITY_DN6638_c0_g1	TraesCS7D01G189400.1	1	1467	2049	0	TraesCS7D01G189400	chr7D	142610235	142612369	ATP-dependent zinc metalloprotease FTSH protein
	TRINITY_DN26865_c1_g1	11.4895	1.09e-21	1.68e-19	UP	TRINITY_DN26865_c1_g1	TraesCS7B01G267300.1	341	663	1062	1.47e-166	TraesCS7B01G267300	chr7B	490432075	490433223	Heat shock transcription factor
	TRINITY_DN3101_c0_g1	3.92253	1.13e-21	1.73e-19	UP	NA	NA	NA	NA	NA	NA	NA	NA	NA	NA	NA
	TRINITY_DN2736_c1_g1	3.96621	1.14e-21	1.75e-19	UP	TRINITY_DN2736_c1_g1	TraesCS7B01G149200.1	127	757	2103	0	TraesCS7B01G149200	chr7B	196904882	196908870	Heat shock protein 90
	TRINITY_DN34990_c0_g1	3.66408	1.14e-21	1.75e-19	UP	TRINITY_DN34990_c0_g1	TraesCS1B01G422400.1	865	1069	1587	1.62e-104	TraesCS1B01G422400	chr1B	645511135	645514305	Structural constituent of cell wall
	TRINITY_DN161_c0_g1	3.79495	1.16e-21	1.77e-19	UP	TRINITY_DN161_c0_g1	TraesCS5B01G405300.1	140	963	963	0	TraesCS5B01G405300	chr5B	580843565	580844781	Peroxidase
	TRINITY_DN19974_c0_g2	10.6506	1.16e-21	1.77e-19	UP	TRINITY_DN19974_c0_g2	TraesCS7A01G397800.1	429	354	429	1.37e-22	TraesCS7A01G397800	chr7A	576957871	576961268	MADS box transcription factor
	TRINITY_DN57170_c0_g1	10.8796	1.17e-21	1.79e-19	UP	NA	NA	NA	NA	NA	NA	NA	NA	NA	NA	NA
	TRINITY_DN19641_c0_g1	14.7743	1.19e-21	1.81e-19	UP	NA	NA	NA	NA	NA	NA	NA	NA	NA	NA	NA
	TRINITY_DN14681_c0_g3	11.7715	1.27e-21	1.93e-19	UP	TRINITY_DN14681_c0_g3	TraesCS6B01G420000.1	998	1038	1038	3.99e-13	TraesCS6B01G420000	chr6B	691632058	691633453	Cinnamoyl CoA reductase
	TRINITY_DN25991_c0_g1	7.60096	1.31e-21	1.99e-19	UP	TRINITY_DN25991_c0_g1	TraesCS3B01G316300.1	1551	1716	1953	1.08e-82	TraesCS3B01G316300	chr3B	507796360	507798528	Cysteine desulfurase
	TRINITY_DN16969_c1_g1	8.45907	1.57e-21	2.37e-19	UP	NA	NA	NA	NA	NA	NA	NA	NA	NA	NA	NA
	TRINITY_DN368_c1_g2	14.5095	1.74e-21	2.62e-19	UP	TRINITY_DN368_c1_g2	TraesCS4A01G077900.1	113	162	321	3.88e-18	TraesCS4A01G077900	chr4A	77091071	77096140	NADH-ubiquinone oxidoreductase chain
	TRINITY_DN312_c0_g4	7.13378	1.82e-21	2.73e-19	UP	NA	NA	NA	NA	NA	NA	NA	NA	NA	NA	NA
	TRINITY_DN38009_c0_g1	6.52716	1.86e-21	2.79e-19	UP	TRINITY_DN38009_c0_g1	TraesCS6A01G146400.1	986	1053	2976	6.93e-28	TraesCS6A01G146400	chr6A	125479812	125485746	ATP-dependent chaperone ClpB
	TRINITY_DN29075_c0_g1	7.64924	1.93e-21	2.89e-19	UP	NA	NA	NA	NA	NA	NA	NA	NA	NA	NA	NA
	TRINITY_DN33020_c0_g1	10.7875	1.96e-21	2.93e-19	UP	TRINITY_DN33020_c0_g1	TraesCS4A01G313400.1	300	543	543	1.33e-125	TraesCS4A01G313400	chr4A	604068519	604069061	AWPM-19-like membrane family protein
	TRINITY_DN1326_c0_g2	6.08605	2.03e-21	3.03e-19	UP	TRINITY_DN1326_c0_g2	TraesCS4A01G191600.1	1	405	405	0	TraesCS4A01G191600	chr4A	471929454	471929858	P-loop containing nucleoside triphosphate hydrolases superfamily protein
	TRINITY_DN37812_c0_g1	7.13156	2.07e-21	3.09e-19	UP	TRINITY_DN37812_c0_g1	TraesCS6A01G146400.1	1082	1139	2976	2.82e-22	TraesCS6A01G146400	chr6A	125479812	125485746	ATP-dependent chaperone ClpB
	TRINITY_DN7490_c4_g2	8.14307	2.11e-21	3.14e-19	UP	TRINITY_DN7490_c4_g2	TraesCS5D01G235000.1	361	225	378	8.81e-44	TraesCS5D01G235000	chr5D	342959216	342959593	Glucan endo-1,3-beta-D-glucosidase 35K, vacuolar
	TRINITY_DN28730_c0_g1	5.70768	2.48e-21	3.67e-19	UP	TRINITY_DN28730_c0_g1	TraesCS5B01G495500.1	530	604	1146	4.41e-32	TraesCS5B01G495500	chr5B	662976884	662980348	Hsp70 nucleotide exchange factor fes1
	TRINITY_DN19099_c0_g1	11.4897	2.48e-21	3.67e-19	UP	TRINITY_DN19099_c0_g1	TraesCS2A01G203300.1	722	660	2094	1.28e-23	TraesCS2A01G203300	chr2A	179278800	179298601	Phospholipid-transporting ATPase
	TRINITY_DN11112_c0_g3	4.46907	2.49e-21	3.68e-19	UP	NA	NA	NA	NA	NA	NA	NA	NA	NA	NA	NA
	TRINITY_DN26201_c0_g1	10.907	2.61e-21	3.86e-19	UP	NA	NA	NA	NA	NA	NA	NA	NA	NA	NA	NA
	TRINITY_DN1654_c0_g1	4.24806	2.69e-21	3.96e-19	UP	TRINITY_DN1654_c0_g1	TraesCS4B01G023600.1	1	708	708	0	TraesCS4B01G023600	chr4B	17060390	17062537	E3 ubiquitin-protein ligase
	TRINITY_DN59239_c0_g1	6.77301	2.82e-21	4.14e-19	UP	NA	NA	NA	NA	NA	NA	NA	NA	NA	NA	NA
	TRINITY_DN10984_c0_g2	5.14712	2.97e-21	4.36e-19	UP	TRINITY_DN10984_c0_g2	TraesCS2B01G530300.1	358	418	495	1.28e-23	TraesCS2B01G530300	chr2B	725111871	725113818	Universal stress family protein
	TRINITY_DN37428_c0_g1	11.5182	3.07e-21	4.49e-19	UP	NA	NA	NA	NA	NA	NA	NA	NA	NA	NA	NA
	TRINITY_DN56848_c0_g1	10.5944	3.1e-21	4.53e-19	UP	NA	NA	NA	NA	NA	NA	NA	NA	NA	NA	NA
	TRINITY_DN16248_c0_g1	10.801	3.54e-21	5.14e-19	UP	NA	NA	NA	NA	NA	NA	NA	NA	NA	NA	NA
	TRINITY_DN11508_c0_g1	6.89492	3.58e-21	5.2e-19	UP	TRINITY_DN11508_c0_g1	TraesCS5A01G103800.1	1037	1082	1128	8.8e-11	TraesCS5A01G103800	chr5A	164135377	164159961	E3 ubiquitin-protein ligase RGLG2
	TRINITY_DN36598_c0_g1	3.50395	3.64e-21	5.27e-19	UP	NA	NA	NA	NA	NA	NA	NA	NA	NA	NA	NA
	TRINITY_DN48219_c0_g1	10.8083	3.85e-21	5.57e-19	UP	TRINITY_DN48219_c0_g1	TraesCS6D01G393800.1	45	424	1164	5.36e-178	TraesCS6D01G393800	chr6D	467546188	467547351	BAG family molecular chaperone regulator 5
	TRINITY_DN108728_c0_g1	6.56601	4.12e-21	5.95e-19	UP	TRINITY_DN108728_c0_g1	TraesCS2D01G050300.1	325	365	1950	6.44e-13	TraesCS2D01G050300	chr2D	18642131	18646326	Peptidylprolyl isomerase
	TRINITY_DN85568_c1_g1	11.6912	4.4e-21	6.35e-19	UP	TRINITY_DN85568_c1_g1	TraesCS2A01G179500.1	380	436	438	1.84e-19	TraesCS2A01G179500	chr2A	138133652	138134089	IgA FC receptor
	TRINITY_DN10553_c0_g1	6.94476	4.5e-21	6.47e-19	UP	NA	NA	NA	NA	NA	NA	NA	NA	NA	NA	NA
	TRINITY_DN23320_c0_g1	7.16625	4.71e-21	6.77e-19	UP	TRINITY_DN23320_c0_g1	TraesCS2D01G106000.1	491	1	825	1.09e-113	TraesCS2D01G106000	chr2D	57264904	57265728	Transcription repressor ofp17
	TRINITY_DN16642_c1_g1	12.7555	4.99e-21	7.16e-19	UP	NA	NA	NA	NA	NA	NA	NA	NA	NA	NA	NA
	TRINITY_DN14627_c0_g1	7.40929	5.08e-21	7.26e-19	UP	TRINITY_DN14627_c0_g1	TraesCS6D01G049100.1	676	777	1998	3.57e-47	TraesCS6D01G049100	chr6D	23832974	23836459	Heat shock 70 kDa protein
	TRINITY_DN52265_c5_g1	4.82674	5.09e-21	7.27e-19	UP	TRINITY_DN52265_c5_g1	TraesCS1B01G082900.1	310	462	462	3.82e-56	TraesCS1B01G082900	chr1B	66928225	66929399	Ankyrin repeat-containing protein
	TRINITY_DN31013_c1_g1	12.0087	5.88e-21	8.38e-19	UP	NA	NA	NA	NA	NA	NA	NA	NA	NA	NA	NA
	TRINITY_DN43593_c1_g1	7.57451	6.09e-21	8.67e-19	UP	TRINITY_DN43593_c1_g1	TraesCS2A01G269600.1	1	318	318	5.97e-152	TraesCS2A01G269600	chr2A	435641621	435642033	BHLH transcription factor
	TRINITY_DN29985_c0_g1	3.84419	6.35e-21	9.01e-19	UP	TRINITY_DN29985_c0_g1	TraesCS4D01G000500.1	288	574	1788	2.86e-148	TraesCS4D01G000500	chr4D	475554	479835	ABC transporter ATP-binding protein ARB1
	TRINITY_DN19103_c0_g1	10.5317	6.62e-21	9.37e-19	UP	TRINITY_DN19103_c0_g1	TraesCS5A01G224800.1	1	572	660	0	TraesCS5A01G224800	chr5A	439844249	439844908	Cell division control, Cdc6
	TRINITY_DN21777_c0_g1	9.31924	6.98e-21	9.85e-19	UP	TRINITY_DN21777_c0_g1	TraesCS2D01G383600.1	825	879	1719	9.62e-21	TraesCS2D01G383600	chr2D	488217560	488220476	Hsp70-Hsp90 organizing protein 1
	TRINITY_DN161627_c0_g1	5.17476	6.98e-21	9.85e-19	UP	TRINITY_DN161627_c0_g1	TraesCS6D01G295500.1	232	1	651	1.14e-107	TraesCS6D01G295500	chr6D	406334688	406335462	Heat-shock protein, putative
	TRINITY_DN7376_c0_g1	4.58581	7.13e-21	1e-18	UP	TRINITY_DN7376_c0_g1	TraesCS7D01G211700.2	738	1143	1143	0	TraesCS7D01G211700	chr7D	169823996	169825318	ADP,ATP carrier protein, mitochondrial
	TRINITY_DN19933_c0_g1	6.96309	7.28e-21	1.02e-18	UP	TRINITY_DN19933_c0_g1	TraesCS7A01G449300.1	1	367	369	1.97e-119	TraesCS7A01G449300	chr7A	643297089	643297519	6-hydroxynicotinate 3-monooxygenase
	TRINITY_DN12136_c0_g1	10.1979	7.89e-21	1.11e-18	UP	TRINITY_DN12136_c0_g1	TraesCS1D01G079400.1	370	174	3189	3.44e-67	TraesCS1D01G079400	chr1D	62110497	62158844	Ankyrin repeat-containing protein
	TRINITY_DN35806_c0_g1	3.80878	8.14e-21	1.14e-18	UP	TRINITY_DN35806_c0_g1	TraesCS5B01G295600.1	222	296	615	6.91e-32	TraesCS5B01G295600	chr5B	479387909	479389657	UPF0664 stress-induced protein C29B12.11c
	TRINITY_DN18040_c0_g3	13.0834	8.86e-21	1.24e-18	UP	TRINITY_DN18040_c0_g3	TraesCS3B01G247200.1	41	108	576	1.36e-26	TraesCS3B01G247200	chr3B	393227665	393229669	Chaperone protein DnaJ
	TRINITY_DN46698_c0_g1	8.25961	9.38e-21	1.31e-18	UP	NA	NA	NA	NA	NA	NA	NA	NA	NA	NA	NA
	TRINITY_DN17035_c0_g4	12.3706	1.03e-20	1.44e-18	UP	NA	NA	NA	NA	NA	NA	NA	NA	NA	NA	NA
	TRINITY_DN38697_c0_g3	7.36796	1.04e-20	1.45e-18	UP	TRINITY_DN38697_c0_g3	TraesCS1D01G153100.1	2789	2678	3486	9.45e-52	TraesCS1D01G153100	chr1D	212501243	212525142	Exportin-4
	TRINITY_DN4137_c0_g1	4.23575	1.05e-20	1.46e-18	UP	NA	NA	NA	NA	NA	NA	NA	NA	NA	NA	NA
	TRINITY_DN2220_c0_g1	3.52921	1.06e-20	1.47e-18	UP	TRINITY_DN2220_c0_g1	TraesCS3D01G020700.1	1	1155	1155	0	TraesCS3D01G020700	chr3D	6971242	6972585	GDSL esterase/lipase
	TRINITY_DN68725_c0_g1	11.9398	1.08e-20	1.49e-18	UP	NA	NA	NA	NA	NA	NA	NA	NA	NA	NA	NA
	TRINITY_DN18113_c0_g2	3.44543	1.11e-20	1.53e-18	UP	TRINITY_DN18113_c0_g2	TraesCS2A01G502200.1	209	299	495	6.68e-41	TraesCS2A01G502200	chr2A	729983738	729985530	Universal stress family protein
	TRINITY_DN96839_c0_g1	8.06479	1.11e-20	1.54e-18	UP	NA	NA	NA	NA	NA	NA	NA	NA	NA	NA	NA
	TRINITY_DN5396_c0_g1	5.00544	1.12e-20	1.54e-18	UP	TRINITY_DN5396_c0_g1	TraesCS2B01G331300.1	570	486	570	2.31e-28	TraesCS2B01G331300	chr2B	474909947	474910516	Protein Ycf2
	TRINITY_DN31096_c3_g1	4.61457	1.12e-20	1.54e-18	UP	NA	NA	NA	NA	NA	NA	NA	NA	NA	NA	NA
	TRINITY_DN10014_c1_g1	4.73673	1.2e-20	1.65e-18	UP	TRINITY_DN10014_c1_g1	TraesCS1B01G294300.1	427	669	1947	1.5e-115	TraesCS1B01G294300	chr1B	512172902	512175830	70 kDa heat shock protein
	TRINITY_DN5991_c0_g1	3.31447	1.3e-20	1.78e-18	UP	TRINITY_DN5991_c0_g1	TraesCS3D01G091700.1	1	894	894	0	TraesCS3D01G091700	chr3D	46470900	46471988	LOB domain-containing protein
	TRINITY_DN4633_c0_g1	5.7168	1.32e-20	1.81e-18	UP	TRINITY_DN4633_c0_g1	TraesCS6D01G097400.1	127	193	603	5.22e-27	TraesCS6D01G097400	chr6D	61141650	61143727	Activator of 90 kDa heat shock protein ATPase
	TRINITY_DN18747_c2_g3	10.6482	1.41e-20	1.92e-18	UP	NA	NA	NA	NA	NA	NA	NA	NA	NA	NA	NA
	TRINITY_DN74336_c0_g1	5.48908	1.51e-20	2.06e-18	UP	TRINITY_DN74336_c0_g1	TraesCS4A01G321300.1	1291	1351	1710	4.85e-24	TraesCS4A01G321300	chr4A	609804687	609807321	Poly [ADP-ribose] polymerase
	TRINITY_DN14493_c0_g1	13.3502	1.61e-20	2.2e-18	UP	NA	NA	NA	NA	NA	NA	NA	NA	NA	NA	NA
	TRINITY_DN29700_c0_g1	11.6499	1.76e-20	2.39e-18	UP	NA	NA	NA	NA	NA	NA	NA	NA	NA	NA	NA
	TRINITY_DN22186_c0_g1	10.1365	1.92e-20	2.6e-18	UP	NA	NA	NA	NA	NA	NA	NA	NA	NA	NA	NA
	TRINITY_DN14061_c1_g1	5.13507	2.01e-20	2.72e-18	UP	NA	NA	NA	NA	NA	NA	NA	NA	NA	NA	NA
	TRINITY_DN45389_c0_g1	7.4253	2.03e-20	2.74e-18	UP	NA	NA	NA	NA	NA	NA	NA	NA	NA	NA	NA
	TRINITY_DN25690_c1_g1	10.5448	2.07e-20	2.8e-18	UP	NA	NA	NA	NA	NA	NA	NA	NA	NA	NA	NA
	TRINITY_DN47715_c0_g1	10.8083	2.08e-20	2.81e-18	UP	NA	NA	NA	NA	NA	NA	NA	NA	NA	NA	NA
	TRINITY_DN41296_c0_g1	5.75764	2.26e-20	3.04e-18	UP	TRINITY_DN41296_c0_g1	TraesCS5A01G302700.1	571	653	705	6.35e-34	TraesCS5A01G302700	chr5A	512066955	512067659	Dirigent protein
	TRINITY_DN55301_c0_g1	7.80469	2.66e-20	3.57e-18	UP	NA	NA	NA	NA	NA	NA	NA	NA	NA	NA	NA
	TRINITY_DN47433_c0_g1	4.48042	2.76e-20	3.7e-18	UP	TRINITY_DN47433_c0_g1	TraesCS4A01G091300.1	1	37	939	2.32e-09	TraesCS4A01G091300	chr4A	97874357	97875989	RNA-binding family protein
	TRINITY_DN189229_c0_g1	11.6407	2.89e-20	3.86e-18	UP	TRINITY_DN189229_c0_g1	TraesCS7B01G093300.3	2488	2218	2784	4.53e-141	TraesCS7B01G093300	chr7B	106945174	106949546	Pentatricopeptide repeat-containing protein
	TRINITY_DN5336_c0_g1	7.78613	3.61e-20	4.81e-18	UP	TRINITY_DN5336_c0_g1	TraesCS6A01G040800.1	318	43	324	7.13e-96	TraesCS6A01G040800	chr6A	21161070	21161663	Zinc finger protein VAR3, chloroplastic
	TRINITY_DN2709_c0_g1	5.09776	3.64e-20	4.84e-18	UP	TRINITY_DN2709_c0_g1	TraesCS3A01G180900.1	72	408	408	5.83e-170	TraesCS3A01G180900	chr3A	208724670	208734181	Transmembrane protein, putative
	TRINITY_DN29190_c0_g1	7.4195	4.15e-20	5.5e-18	UP	TRINITY_DN29190_c0_g1	TraesCS6D01G275600.1	1	384	492	0	TraesCS6D01G275600	chr6D	384361544	384362406	NADH-ubiquinone reductase complex 1 MLRQ subunit
	TRINITY_DN6843_c0_g1	3.9395	4.26e-20	5.63e-18	UP	TRINITY_DN6843_c0_g1	TraesCS5B01G495500.1	948	1146	1146	1.24e-98	TraesCS5B01G495500	chr5B	662976884	662980348	Hsp70 nucleotide exchange factor fes1
	TRINITY_DN35700_c0_g1	14.4006	4.64e-20	6.12e-18	UP	NA	NA	NA	NA	NA	NA	NA	NA	NA	NA	NA
	TRINITY_DN25934_c1_g2	5.18559	4.9e-20	6.47e-18	UP	TRINITY_DN25934_c1_g2	TraesCS6A01G379800.1	352	151	1344	2.37e-100	TraesCS6A01G379800	chr6A	600403258	600406136	COBRA-like protein
	TRINITY_DN206_c0_g1	3.16383	5.07e-20	6.67e-18	UP	NA	NA	NA	NA	NA	NA	NA	NA	NA	NA	NA
	TRINITY_DN11409_c0_g1	8.27437	5.23e-20	6.87e-18	UP	TRINITY_DN11409_c0_g1	TraesCS4D01G173900.1	431	1491	1491	0	TraesCS4D01G173900	chr4D	301734059	301737360	Bromodomain containing protein, expressed
	TRINITY_DN8189_c0_g1	12.0242	5.25e-20	6.88e-18	UP	NA	NA	NA	NA	NA	NA	NA	NA	NA	NA	NA
	TRINITY_DN15815_c0_g2	5.56093	5.37e-20	7.04e-18	UP	NA	NA	NA	NA	NA	NA	NA	NA	NA	NA	NA
	TRINITY_DN21223_c1_g1	7.31315	5.86e-20	7.67e-18	UP	NA	NA	NA	NA	NA	NA	NA	NA	NA	NA	NA
	TRINITY_DN7547_c0_g1	3.8527	5.88e-20	7.68e-18	UP	TRINITY_DN7547_c0_g1	TraesCS1A01G317200.1	636	697	933	1.73e-24	TraesCS1A01G317200	chr1A	508641117	508642831	DCD (Development and cell death) domain protein
	TRINITY_DN29182_c0_g1	4.63064	5.95e-20	7.75e-18	UP	NA	NA	NA	NA	NA	NA	NA	NA	NA	NA	NA
	TRINITY_DN15032_c0_g1	4.69739	5.96e-20	7.76e-18	UP	NA	NA	NA	NA	NA	NA	NA	NA	NA	NA	NA
	TRINITY_DN25995_c0_g1	10.9333	6e-20	7.79e-18	UP	TRINITY_DN25995_c0_g1	TraesCS6A01G381400.1	315	927	1038	0	TraesCS6A01G381400	chr6A	601146836	601148224	Cinnamoyl CoA reductase
	TRINITY_DN19154_c0_g1	10.5047	6.02e-20	7.81e-18	UP	TRINITY_DN19154_c0_g1	TraesCS6B01G080100.1	1256	1315	1323	1.37e-16	TraesCS6B01G080100	chr6B	56200683	56202005	UDP-glycosyltransferase
	TRINITY_DN22892_c0_g2	10.825	6.38e-20	8.27e-18	UP	TRINITY_DN22892_c0_g2	TraesCS5A01G548000.3	2517	2575	3933	2.39e-23	TraesCS5A01G548000	chr5A	702165549	702169903	BAG family molecular chaperone regulator 6
	TRINITY_DN55933_c0_g2	6.6458	6.48e-20	8.38e-18	UP	NA	NA	NA	NA	NA	NA	NA	NA	NA	NA	NA
	TRINITY_DN105870_c0_g1	10.4517	6.63e-20	8.57e-18	UP	TRINITY_DN105870_c0_g1	TraesCS1D01G142900.1	444	566	582	9.9e-39	TraesCS1D01G142900	chr1D	198172390	198172971	Ethylene-responsive transcription factor, putative
	TRINITY_DN25934_c0_g1	4.87316	6.65e-20	8.58e-18	UP	TRINITY_DN25934_c0_g1	TraesCS6B01G418400.1	154	211	1344	1.39e-22	TraesCS6B01G418400	chr6B	690558885	690561813	COBRA-like protein
	TRINITY_DN16121_c1_g1	4.83051	6.69e-20	8.61e-18	UP	NA	NA	NA	NA	NA	NA	NA	NA	NA	NA	NA
	TRINITY_DN14046_c0_g1	6.94237	6.72e-20	8.64e-18	UP	TRINITY_DN14046_c0_g1	TraesCS6A01G284000.1	2	279	306	3.07e-91	TraesCS6A01G284000	chr6A	515062858	515063163	GAMMA-TUBULIN COMPLEX PROTEIN 4
	TRINITY_DN30496_c0_g1	3.59868	6.93e-20	8.9e-18	UP	NA	NA	NA	NA	NA	NA	NA	NA	NA	NA	NA
	TRINITY_DN12004_c0_g1	9.38466	6.97e-20	8.94e-18	UP	TRINITY_DN12004_c0_g1	TraesCS2B01G294500.1	1108	1204	1764	1.04e-42	TraesCS2B01G294500	chr2B	411140591	411143398	Peptidylprolyl isomerase
	TRINITY_DN2396_c0_g1	7.22538	7.06e-20	9.04e-18	UP	TRINITY_DN2396_c0_g1	TraesCS1B01G291900.2	1245	1068	1245	6.53e-87	TraesCS1B01G291900	chr1B	509010392	509014397	Tetratricopeptide repeat (TPR)-like superfamily protein
	TRINITY_DN2903_c0_g1	4.92463	7.16e-20	9.15e-18	UP	TRINITY_DN2903_c0_g1	TraesCS1A01G375600.2	255	1107	1107	0	TraesCS1A01G375600	chr1A	550311989	550314347	Heat shock transcription factor
	TRINITY_DN47512_c0_g1	10.3124	7.45e-20	9.5e-18	UP	NA	NA	NA	NA	NA	NA	NA	NA	NA	NA	NA
	TRINITY_DN7186_c0_g1	13.758	7.54e-20	9.59e-18	UP	TRINITY_DN7186_c0_g1	TraesCS4B01G114400.1	63	1	1164	6.63e-11	TraesCS4B01G114400	chr4B	129524890	129526053	Anthranilate synthase alpha subunit 2, chloroplastic
	TRINITY_DN90702_c0_g2	11.7782	7.63e-20	9.68e-18	UP	TRINITY_DN90702_c0_g2	TraesCS5A01G482400.1	202	256	1146	2.69e-19	TraesCS5A01G482400	chr5A	654086402	654090003	Hsp70 nucleotide exchange factor fes1
	TRINITY_DN9623_c0_g2	7.47977	8.25e-20	1.05e-17	UP	TRINITY_DN9623_c0_g2	TraesCS4D01G080700.1	1	278	918	5.69e-144	TraesCS4D01G080700	chr4D	54678122	54683948	ATP-dependent (S)-NAD(P)H-hydrate dehydratase
	TRINITY_DN7861_c0_g2	7.57369	8.61e-20	1.09e-17	UP	TRINITY_DN7861_c0_g2	TraesCS4B01G299500.1	951	253	951	0	TraesCS4B01G299500	chr4B	585963224	585964442	Ethylene-responsive transcription factor
	TRINITY_DN616_c0_g1	7.49626	8.65e-20	1.09e-17	UP	TRINITY_DN616_c0_g1	TraesCS4B01G243400.1	1618	1743	1743	2.53e-60	TraesCS4B01G243400	chr4B	504934572	504936314	Heat shock 70 kDa protein
	TRINITY_DN15478_c0_g1	10.4328	8.81e-20	1.11e-17	UP	NA	NA	NA	NA	NA	NA	NA	NA	NA	NA	NA
	TRINITY_DN58791_c1_g1	10.4681	9.02e-20	1.14e-17	UP	NA	NA	NA	NA	NA	NA	NA	NA	NA	NA	NA
	TRINITY_DN15633_c1_g1	4.46609	9.05e-20	1.14e-17	UP	TRINITY_DN15633_c1_g1	TraesCS2D01G534500.1	1	249	249	2.13e-128	TraesCS2D01G534500	chr2D	618147782	618148302	Wound-responsive family protein
	TRINITY_DN18747_c2_g1	10.8663	9.13e-20	1.15e-17	UP	TRINITY_DN18747_c2_g1	TraesCS1B01G325600.1	927	787	927	7.22e-44	TraesCS1B01G325600	chr1B	551218727	551219653	Transposon protein, putative, Mutator sub-class
	TRINITY_DN13811_c0_g1	7.3646	9.31e-20	1.17e-17	UP	TRINITY_DN13811_c0_g1	TraesCS2B01G152700.1	122	1221	2343	0	TraesCS2B01G152700	chr2B	119629745	119634054	Phosphatidylinositol 4-phosphate 5-kinase 4
	TRINITY_DN27600_c0_g1	4.37405	9.4e-20	1.18e-17	UP	TRINITY_DN27600_c0_g1	TraesCS3A01G294500.1	496	626	660	1.07e-59	TraesCS3A01G294500	chr3A	528528844	528531755	Calcyclin-binding protein
	TRINITY_DN46592_c0_g3	10.4352	9.44e-20	1.18e-17	UP	TRINITY_DN46592_c0_g3	TraesCS2B01G246300.1	342	121	342	1.44e-39	TraesCS2B01G246300	chr2B	250725322	250725815	Transcription elongation factor 1
	TRINITY_DN17545_c0_g1	7.4631	9.57e-20	1.19e-17	UP	TRINITY_DN17545_c0_g1	TraesCS4B01G243400.1	1203	1484	1743	3.63e-147	TraesCS4B01G243400	chr4B	504934572	504936314	Heat shock 70 kDa protein
	TRINITY_DN190602_c0_g1	12.3298	9.72e-20	1.21e-17	UP	NA	NA	NA	NA	NA	NA	NA	NA	NA	NA	NA
	TRINITY_DN57782_c0_g1	12.5583	1.03e-19	1.28e-17	UP	NA	NA	NA	NA	NA	NA	NA	NA	NA	NA	NA
	TRINITY_DN51995_c0_g1	4.42148	1.04e-19	1.29e-17	UP	NA	NA	NA	NA	NA	NA	NA	NA	NA	NA	NA
	TRINITY_DN54525_c0_g2	4.39311	1.11e-19	1.37e-17	UP	TRINITY_DN54525_c0_g2	TraesCS3A01G161200.1	1	119	1038	4.9e-50	TraesCS3A01G161200	chr3A	162756053	162759732	Chaperone protein dnaJ
	TRINITY_DN9896_c0_g1	3.99006	1.12e-19	1.39e-17	UP	TRINITY_DN9896_c0_g1	TraesCS3D01G157300.1	1	141	210	3.76e-66	TraesCS3D01G157300	chr3D	125482328	125483973	Cx9C motif-containing protein 4, mitochondrial
	TRINITY_DN233617_c0_g1	9.2414	1.14e-19	1.41e-17	UP	NA	NA	NA	NA	NA	NA	NA	NA	NA	NA	NA
	TRINITY_DN13029_c0_g1	5.42119	1.21e-19	1.5e-17	UP	TRINITY_DN13029_c0_g1	TraesCS4A01G098600.1	1452	2008	2010	0	TraesCS4A01G098600	chr4A	110636564	110639356	70 kDa heat shock protein
	TRINITY_DN21524_c0_g1	7.00847	1.24e-19	1.53e-17	UP	TRINITY_DN21524_c0_g1	TraesCS6A01G109000.1	257	351	627	6.56e-40	TraesCS6A01G109000	chr6A	77785455	77788902	Activator of 90 kDa heat shock protein ATPase
	TRINITY_DN71685_c0_g2	6.07322	1.29e-19	1.59e-17	UP	NA	NA	NA	NA	NA	NA	NA	NA	NA	NA	NA
	TRINITY_DN4196_c0_g1	13.8409	1.29e-19	1.59e-17	UP	NA	NA	NA	NA	NA	NA	NA	NA	NA	NA	NA
	TRINITY_DN16502_c0_g1	4.51368	1.31e-19	1.6e-17	UP	TRINITY_DN16502_c0_g1	TraesCS4A01G091300.1	1	37	939	2.57e-09	TraesCS4A01G091300	chr4A	97874357	97875989	RNA-binding family protein
	TRINITY_DN23158_c0_g1	12.0607	1.39e-19	1.71e-17	UP	NA	NA	NA	NA	NA	NA	NA	NA	NA	NA	NA
	TRINITY_DN18757_c0_g1	4.96587	1.4e-19	1.72e-17	UP	TRINITY_DN18757_c0_g1	TraesCS5A01G547300.1	2253	2505	2925	4.26e-131	TraesCS5A01G547300	chr5A	701070086	701075789	ATP-dependent chaperone ClpB
	TRINITY_DN16969_c0_g1	5.94267	1.41e-19	1.72e-17	UP	TRINITY_DN16969_c0_g1	TraesCS6B01G187700.4	819	682	819	3.43e-43	TraesCS6B01G187700	chr6B	215140534	215149007	NADPH--cytochrome P450 reductase
	TRINITY_DN11891_c0_g3	7.62958	1.46e-19	1.78e-17	UP	NA	NA	NA	NA	NA	NA	NA	NA	NA	NA	NA
	TRINITY_DN1143_c0_g1	5.31711	1.63e-19	1.99e-17	UP	TRINITY_DN1143_c0_g1	TraesCS7D01G068800.1	1	419	1002	0	TraesCS7D01G068800	chr7D	39514541	39517436	Myeloid leukemia factor 1
	TRINITY_DN3397_c1_g1	4.11607	1.64e-19	1.99e-17	UP	TRINITY_DN3397_c1_g1	TraesCS7B01G139300.1	1	723	723	0	TraesCS7B01G139300	chr7B	175895933	175896965	D-alanine-D-alanine ligase family
	TRINITY_DN21680_c0_g1	4.38321	1.64e-19	1.99e-17	UP	TRINITY_DN21680_c0_g1	TraesCS7B01G351000.1	338	398	885	8.49e-23	TraesCS7B01G351000	chr7B	608192042	608194211	Phosphosulfolactate synthase-related protein
	TRINITY_DN28004_c0_g1	10.5769	1.72e-19	2.08e-17	UP	NA	NA	NA	NA	NA	NA	NA	NA	NA	NA	NA
	TRINITY_DN34234_c0_g1	10.5897	1.84e-19	2.22e-17	UP	TRINITY_DN34234_c0_g1	TraesCS3B01G384800.1	462	520	1377	2.67e-23	TraesCS3B01G384800	chr3B	605014208	605017449	Carboxypeptidase
	TRINITY_DN8251_c0_g4	5.19262	1.88e-19	2.27e-17	UP	TRINITY_DN8251_c0_g4	TraesCS5A01G019900.1	1	1530	1530	0	TraesCS5A01G019900	chr5A	16543562	16545091	ATP synthase subunit alpha
	TRINITY_DN74090_c0_g2	4.75186	1.96e-19	2.36e-17	UP	NA	NA	NA	NA	NA	NA	NA	NA	NA	NA	NA
	TRINITY_DN55300_c0_g2	10.4728	2.14e-19	2.58e-17	UP	NA	NA	NA	NA	NA	NA	NA	NA	NA	NA	NA
	TRINITY_DN32930_c0_g1	8.30549	2.24e-19	2.69e-17	UP	TRINITY_DN32930_c0_g1	TraesCS2D01G300700.1	506	786	786	1.86e-129	TraesCS2D01G300700	chr2D	383093295	383094080	Ethylene-responsive transcription factor
	TRINITY_DN143339_c0_g1	10.3821	2.24e-19	2.69e-17	UP	NA	NA	NA	NA	NA	NA	NA	NA	NA	NA	NA
	TRINITY_DN35163_c0_g1	6.70969	2.28e-19	2.73e-17	UP	NA	NA	NA	NA	NA	NA	NA	NA	NA	NA	NA
	TRINITY_DN77414_c0_g1	5.79301	2.29e-19	2.74e-17	UP	NA	NA	NA	NA	NA	NA	NA	NA	NA	NA	NA
	TRINITY_DN40338_c0_g1	5.11791	2.48e-19	2.96e-17	UP	NA	NA	NA	NA	NA	NA	NA	NA	NA	NA	NA
	TRINITY_DN23880_c0_g1	11.505	2.54e-19	3.04e-17	UP	TRINITY_DN23880_c0_g1	TraesCS5D01G258900.2	319	383	2346	1.17e-26	TraesCS5D01G258900	chr5D	365125649	365129881	Chaperone protein htpG family protein
	TRINITY_DN20770_c1_g2	6.56029	2.64e-19	3.15e-17	UP	TRINITY_DN20770_c1_g2	TraesCS2B01G330000.1	1942	1773	2007	6.59e-76	TraesCS2B01G330000	chr2B	474544531	474559673	Copalyl diphosphate synthase
	TRINITY_DN43666_c1_g1	10.67	2.67e-19	3.18e-17	UP	NA	NA	NA	NA	NA	NA	NA	NA	NA	NA	NA
	TRINITY_DN31935_c0_g1	9.94136	2.69e-19	3.19e-17	UP	TRINITY_DN31935_c0_g1	TraesCS5D01G393600.1	1	93	750	3.36e-42	TraesCS5D01G393600	chr5D	461912557	461913422	Bax inhibitor-1 family protein
	TRINITY_DN94651_c0_g2	4.92153	2.69e-19	3.2e-17	UP	NA	NA	NA	NA	NA	NA	NA	NA	NA	NA	NA
	TRINITY_DN6499_c0_g2	7.81111	2.82e-19	3.35e-17	UP	TRINITY_DN6499_c0_g2	TraesCS7D01G540700.3	23	129	1452	1.31e-47	TraesCS7D01G540700	chr7D	630527242	630530005	MYB-related protein
	TRINITY_DN11387_c0_g1	7.22017	2.88e-19	3.41e-17	UP	TRINITY_DN11387_c0_g1	TraesCS5D01G031700.1	515	598	819	1.86e-25	TraesCS5D01G031700	chr5D	29132316	29134261	2-aminoethanethiol dioxygenase
	TRINITY_DN24391_c1_g2	10.2483	2.92e-19	3.45e-17	UP	TRINITY_DN24391_c1_g2	TraesCS2A01G371100.1	918	537	918	0	TraesCS2A01G371100	chr2A	613688638	613690027	Short chain dehydrogenase/reductase
	TRINITY_DN50382_c0_g3	10.6396	2.93e-19	3.46e-17	UP	TRINITY_DN50382_c0_g3	TraesCS4D01G298300.1	329	1	387	1.3e-70	TraesCS4D01G298300	chr4D	467616558	467617195	Trypsin inhibitor
	TRINITY_DN71615_c0_g1	10.3623	3.01e-19	3.55e-17	UP	NA	NA	NA	NA	NA	NA	NA	NA	NA	NA	NA
	TRINITY_DN4721_c0_g1	9.59927	3.18e-19	3.74e-17	UP	TRINITY_DN4721_c0_g1	TraesCS7B01G388700.1	1	239	3873	2.51e-123	TraesCS7B01G388700	chr7B	654949049	654953437	BAG family molecular chaperone regulator 6
	TRINITY_DN202_c1_g1	3.91043	3.22e-19	3.79e-17	UP	TRINITY_DN202_c1_g1	TraesCS5A01G482400.1	631	1146	1146	0	TraesCS5A01G482400	chr5A	654086402	654090003	Hsp70 nucleotide exchange factor fes1
	TRINITY_DN36538_c2_g1	8.79797	3.39e-19	3.97e-17	UP	TRINITY_DN36538_c2_g1	TraesCS2A01G361100.2	894	855	894	1.81e-10	TraesCS2A01G361100	chr2A	605164949	605171281	Disease resistance protein (NBS-LRR class) family
	TRINITY_DN56_c0_g1	5.07996	3.45e-19	4.04e-17	UP	TRINITY_DN56_c0_g1	TraesCS7B01G083500.1	72	702	702	0	TraesCS7B01G083500	chr7B	94263847	94264657	Heat-shock protein, putative
	TRINITY_DN77323_c0_g1	11.897	3.48e-19	4.06e-17	UP	TRINITY_DN77323_c0_g1	TraesCS4A01G286000.1	667	714	1593	9.49e-17	TraesCS4A01G286000	chr4A	591845836	591851939	ARM repeat superfamily protein
	TRINITY_DN26865_c3_g1	14.4156	3.65e-19	4.26e-17	UP	TRINITY_DN26865_c3_g1	TraesCS7B01G267300.1	617	932	1062	1.15e-142	TraesCS7B01G267300	chr7B	490432075	490433223	Heat shock transcription factor
	TRINITY_DN22284_c0_g3	5.52407	3.71e-19	4.33e-17	UP	TRINITY_DN22284_c0_g3	TraesCS2B01G404400.1	863	514	1731	7.46e-170	TraesCS2B01G404400	chr2B	572554778	572557919	Hsp70-Hsp90 organizing protein 1
	TRINITY_DN17820_c9_g1	9.65057	3.79e-19	4.4e-17	UP	NA	NA	NA	NA	NA	NA	NA	NA	NA	NA	NA
	TRINITY_DN19686_c2_g1	10.4589	3.85e-19	4.47e-17	UP	NA	NA	NA	NA	NA	NA	NA	NA	NA	NA	NA
	TRINITY_DN34199_c0_g1	7.11401	3.89e-19	4.52e-17	UP	TRINITY_DN34199_c0_g1	TraesCS1B01G151300.1	774	822	2061	1.69e-17	TraesCS1B01G151300	chr1B	236957822	236963066	Chaperone DnaK
	TRINITY_DN4009_c0_g1	4.23672	4.05e-19	4.68e-17	UP	TRINITY_DN4009_c0_g1	TraesCS4B01G056300.1	1	291	291	3.92e-87	TraesCS4B01G056300	chr4B	45772210	45772500	Lariat debranching enzyme
	TRINITY_DN21871_c0_g2	4.36857	4.07e-19	4.71e-17	UP	TRINITY_DN21871_c0_g2	TraesCS5A01G545900.1	555	488	555	5.63e-28	TraesCS5A01G545900	chr5A	700444726	700445401	Phosphatidylinositol N-acetylglucosaminyltransferase subunit P
	TRINITY_DN37736_c0_g1	10.3807	4.11e-19	4.75e-17	UP	NA	NA	NA	NA	NA	NA	NA	NA	NA	NA	NA
	TRINITY_DN8481_c1_g1	4.4343	4.19e-19	4.83e-17	UP	TRINITY_DN8481_c1_g1	TraesCS1A01G285000.1	1058	1353	1845	1.43e-146	TraesCS1A01G285000	chr1A	482335991	482338978	70 kDa heat shock protein
	TRINITY_DN39290_c0_g1	3.51862	4.23e-19	4.86e-17	UP	TRINITY_DN39290_c0_g1	TraesCS7D01G438700.1	976	1245	1581	3.51e-137	TraesCS7D01G438700	chr7D	557841210	557843669	Cytochrome P450
	TRINITY_DN2046_c1_g1	10.6719	4.34e-19	4.99e-17	UP	TRINITY_DN2046_c1_g1	TraesCS2B01G053200.1	1	165	906	1.41e-80	TraesCS2B01G053200	chr2B	26135642	26136547	Acidic chitinase
	TRINITY_DN4208_c0_g1	3.92196	4.35e-19	5e-17	UP	TRINITY_DN4208_c0_g1	TraesCS6D01G349500.1	1	537	537	0	TraesCS6D01G349500	chr6D	447278039	447278902	Serine-rich protein
	TRINITY_DN42875_c0_g1	10.5386	4.6e-19	5.27e-17	UP	TRINITY_DN42875_c0_g1	TraesCS4A01G089100.1	234	291	324	8.39e-23	TraesCS4A01G089100	chr4A	95175051	95177365	Selenoprotein K
	TRINITY_DN161401_c0_g1	8.08671	4.67e-19	5.34e-17	UP	NA	NA	NA	NA	NA	NA	NA	NA	NA	NA	NA
	TRINITY_DN9117_c5_g1	10.5693	4.67e-19	5.34e-17	UP	NA	NA	NA	NA	NA	NA	NA	NA	NA	NA	NA
	TRINITY_DN83634_c0_g1	6.19679	4.81e-19	5.49e-17	UP	TRINITY_DN83634_c0_g1	TraesCS5B01G260300.1	1	1269	1269	0	TraesCS5B01G260300	chr5B	442825187	442826455	Retrotransposon protein, putative, unclassified
	TRINITY_DN4776_c0_g3	12.72	4.88e-19	5.56e-17	UP	TRINITY_DN4776_c0_g3	TraesCS3D01G115100.1	10	480	480	9.47e-132	TraesCS3D01G115100	chr3D	68389095	68389856	Heat shock protein
	TRINITY_DN8608_c0_g1	8.48011	4.89e-19	5.56e-17	UP	NA	NA	NA	NA	NA	NA	NA	NA	NA	NA	NA
	TRINITY_DN19240_c1_g1	10.5453	4.98e-19	5.65e-17	UP	NA	NA	NA	NA	NA	NA	NA	NA	NA	NA	NA
	TRINITY_DN15670_c0_g1	5.25692	5.46e-19	6.2e-17	UP	NA	NA	NA	NA	NA	NA	NA	NA	NA	NA	NA
	TRINITY_DN32956_c0_g2	4.47407	5.78e-19	6.55e-17	UP	TRINITY_DN32956_c0_g2	TraesCS1A01G379200.1	569	606	705	3.6e-09	TraesCS1A01G379200	chr1A	551479529	551482223	Pre-rRNA-processing protein ESF2
	TRINITY_DN8792_c0_g1	3.60631	6e-19	6.79e-17	UP	NA	NA	NA	NA	NA	NA	NA	NA	NA	NA	NA
	TRINITY_DN14329_c0_g1	4.77719	6.08e-19	6.87e-17	UP	TRINITY_DN14329_c0_g1	TraesCS2A01G050600.1	1575	1632	1938	1.54e-22	TraesCS2A01G050600	chr2A	19646183	19652126	Peptidylprolyl isomerase
	TRINITY_DN1687_c1_g1	5.27271	6.5e-19	7.34e-17	UP	TRINITY_DN1687_c1_g1	TraesCSU01G116400.1	209	631	2019	0	TraesCSU01G116400	chrUn	100323369	100327948	Chaperone DnaK
	TRINITY_DN16121_c0_g2	5.10482	6.57e-19	7.41e-17	UP	NA	NA	NA	NA	NA	NA	NA	NA	NA	NA	NA
	TRINITY_DN61388_c0_g1	6.29233	6.64e-19	7.48e-17	UP	NA	NA	NA	NA	NA	NA	NA	NA	NA	NA	NA
	TRINITY_DN75874_c0_g1	6.47799	6.9e-19	7.76e-17	UP	NA	NA	NA	NA	NA	NA	NA	NA	NA	NA	NA
	TRINITY_DN15259_c0_g1	6.32569	6.94e-19	7.79e-17	UP	TRINITY_DN15259_c0_g1	TraesCS1B01G325600.1	787	844	927	9.05e-21	TraesCS1B01G325600	chr1B	551218727	551219653	Transposon protein, putative, Mutator sub-class
	TRINITY_DN87316_c0_g2	8.5491	7.22e-19	8.09e-17	UP	TRINITY_DN87316_c0_g2	TraesCS5D01G454000.1	827	912	912	1.2e-36	TraesCS5D01G454000	chr5D	501150641	501152433	OTU domain-containing protein
	TRINITY_DN45256_c0_g1	10.3192	7.59e-19	8.5e-17	UP	NA	NA	NA	NA	NA	NA	NA	NA	NA	NA	NA
	TRINITY_DN38436_c0_g1	9.34792	8.87e-19	9.9e-17	UP	NA	NA	NA	NA	NA	NA	NA	NA	NA	NA	NA
	TRINITY_DN10336_c0_g4	4.00621	9.21e-19	1.03e-16	UP	TRINITY_DN10336_c0_g4	TraesCS2B01G131200.1	448	543	543	9.34e-42	TraesCS2B01G131200	chr2B	98256232	98257121	Universal stress protein
	TRINITY_DN1600_c0_g1	3.246	9.31e-19	1.04e-16	UP	TRINITY_DN1600_c0_g1	TraesCS6A01G292300.2	710	545	726	6.59e-80	TraesCS6A01G292300	chr6A	524304843	524312602	AGAMOUS-like MADS-box transcription factor
	TRINITY_DN485_c1_g1	4.92322	9.57e-19	1.06e-16	UP	NA	NA	NA	NA	NA	NA	NA	NA	NA	NA	NA
	TRINITY_DN27213_c0_g1	3.49732	9.88e-19	1.1e-16	UP	TRINITY_DN27213_c0_g1	TraesCS1A01G051500.1	381	474	528	9.71e-41	TraesCS1A01G051500	chr1A	33019173	33022461	Prostaglandin E synthase 3
	TRINITY_DN4880_c0_g2	5.78738	1.07e-18	1.19e-16	UP	TRINITY_DN4880_c0_g2	TraesCS3B01G510700.1	348	133	348	7.19e-82	TraesCS3B01G510700	chr3B	754874453	754875695	Coatomer, beta' subunit
	TRINITY_DN29700_c0_g2	13.6007	1.13e-18	1.25e-16	UP	NA	NA	NA	NA	NA	NA	NA	NA	NA	NA	NA
	TRINITY_DN509_c2_g1	11.4934	1.17e-18	1.29e-16	UP	NA	NA	NA	NA	NA	NA	NA	NA	NA	NA	NA
	TRINITY_DN565_c1_g2	8.93513	1.17e-18	1.29e-16	UP	TRINITY_DN565_c1_g2	TraesCS2B01G263300.1	133	1	2886	5.91e-63	TraesCS2B01G263300	chr2B	353564559	353586560	Valine--tRNA ligase
	TRINITY_DN132691_c0_g3	4.74601	1.19e-18	1.32e-16	UP	TRINITY_DN132691_c0_g3	TraesCS6D01G364400.1	537	607	1344	6.79e-30	TraesCS6D01G364400	chr6D	454230135	454233225	COBRA-like protein
	TRINITY_DN67681_c0_g1	3.68672	1.22e-18	1.35e-16	UP	NA	NA	NA	NA	NA	NA	NA	NA	NA	NA	NA
	TRINITY_DN53495_c0_g2	14.2061	1.27e-18	1.4e-16	UP	TRINITY_DN53495_c0_g2	TraesCS2A01G130800.1	1200	1034	2349	8.19e-48	TraesCS2A01G130800	chr2A	78560529	78564496	Phosphatidylinositol 4-phosphate 5-kinase 4
	TRINITY_DN12998_c0_g2	7.09758	1.31e-18	1.44e-16	UP	NA	NA	NA	NA	NA	NA	NA	NA	NA	NA	NA
	TRINITY_DN3786_c0_g1	3.92214	1.37e-18	1.5e-16	UP	TRINITY_DN3786_c0_g1	TraesCS3B01G255300.1	636	702	1134	4.83e-27	TraesCS3B01G255300	chr3B	411831372	411837719	SGT1
	TRINITY_DN26709_c0_g3	7.67846	1.45e-18	1.58e-16	UP	NA	NA	NA	NA	NA	NA	NA	NA	NA	NA	NA
	TRINITY_DN46052_c0_g2	10.3969	1.52e-18	1.66e-16	UP	NA	NA	NA	NA	NA	NA	NA	NA	NA	NA	NA
	TRINITY_DN58630_c7_g1	11.3153	1.52e-18	1.66e-16	UP	TRINITY_DN58630_c7_g1	TraesCS1B01G335400.1	507	267	1503	1.89e-124	TraesCS1B01G335400	chr1B	562468353	562469855	NB-ARC domain-containing disease resistance protein
	TRINITY_DN23480_c0_g1	5.07102	1.53e-18	1.67e-16	UP	TRINITY_DN23480_c0_g1	TraesCS7A01G073800.1	678	915	915	1.94e-83	TraesCS7A01G073800	chr7A	39227825	39230863	Myeloid leukemia factor 1
	TRINITY_DN5011_c0_g1	10.4703	1.64e-18	1.79e-16	UP	TRINITY_DN5011_c0_g1	TraesCS3A01G023100.1	186	18	1926	4.65e-47	TraesCS3A01G023100	chr3A	12958314	12961343	Glycosyltransferase
	TRINITY_DN25995_c0_g2	11.238	1.66e-18	1.8e-16	UP	TRINITY_DN25995_c0_g2	TraesCS6B01G420200.1	319	654	1038	1.18e-173	TraesCS6B01G420200	chr6B	691782272	691783993	Cinnamoyl CoA reductase
	TRINITY_DN154892_c0_g1	13.2036	1.68e-18	1.82e-16	UP	TRINITY_DN154892_c0_g1	TraesCS3B01G130400.1	66	1	483	1.41e-20	TraesCS3B01G130400	chr3B	112496506	112497228	Heat shock protein
	TRINITY_DN100050_c0_g1	3.17946	1.7e-18	1.84e-16	UP	TRINITY_DN100050_c0_g1	TraesCS2D01G395300.1	481	258	537	2.33e-98	TraesCS2D01G395300	chr2D	506651461	506652088	Histone H1
	TRINITY_DN77607_c0_g1	6.06215	1.72e-18	1.86e-16	UP	TRINITY_DN77607_c0_g1	TraesCS7D01G365500.1	282	585	585	5.68e-129	TraesCS7D01G365500	chr7D	471931849	471932851	Oxidative stress 3, putative isoform 1
	TRINITY_DN9027_c0_g2	13.9692	1.73e-18	1.88e-16	UP	NA	NA	NA	NA	NA	NA	NA	NA	NA	NA	NA
	TRINITY_DN8979_c0_g1	4.16609	1.81e-18	1.96e-16	UP	NA	NA	NA	NA	NA	NA	NA	NA	NA	NA	NA
	TRINITY_DN5128_c0_g1	3.96646	1.83e-18	1.97e-16	UP	NA	NA	NA	NA	NA	NA	NA	NA	NA	NA	NA
	TRINITY_DN23220_c0_g1	3.695	1.83e-18	1.97e-16	UP	TRINITY_DN23220_c0_g1	TraesCS5A01G426100.1	222	324	1266	1.13e-47	TraesCS5A01G426100	chr5A	611339340	611341842	Chaperone protein dnaJ, putative
	TRINITY_DN9117_c0_g1	4.63417	1.85e-18	1.99e-16	UP	TRINITY_DN9117_c0_g1	TraesCS5B01G293200.1	406	457	465	3.63e-14	TraesCS5B01G293200	chr5B	478336154	478336618	Formate--tetrahydrofolate ligase
	TRINITY_DN22819_c1_g1	4.34428	1.86e-18	2e-16	UP	NA	NA	NA	NA	NA	NA	NA	NA	NA	NA	NA
	TRINITY_DN74090_c0_g3	10.2776	1.9e-18	2.03e-16	UP	NA	NA	NA	NA	NA	NA	NA	NA	NA	NA	NA
	TRINITY_DN13780_c0_g1	12.0896	2.15e-18	2.3e-16	UP	NA	NA	NA	NA	NA	NA	NA	NA	NA	NA	NA
	TRINITY_DN56881_c0_g2	10.1082	2.16e-18	2.31e-16	UP	NA	NA	NA	NA	NA	NA	NA	NA	NA	NA	NA
	TRINITY_DN15612_c0_g1	5.15589	2.2e-18	2.35e-16	UP	TRINITY_DN15612_c0_g1	TraesCS7B01G194200.1	1	601	1110	0	TraesCS7B01G194200	chr7B	333957975	333963387	Thioredoxin reductase
	TRINITY_DN18212_c0_g1	7.57937	2.21e-18	2.36e-16	UP	NA	NA	NA	NA	NA	NA	NA	NA	NA	NA	NA
	TRINITY_DN28505_c1_g1	7.56527	2.48e-18	2.64e-16	UP	NA	NA	NA	NA	NA	NA	NA	NA	NA	NA	NA
	TRINITY_DN7391_c0_g1	3.9387	2.58e-18	2.75e-16	UP	TRINITY_DN7391_c0_g1	TraesCS5D01G412900.1	1	237	237	1e-119	TraesCS5D01G412900	chr5D	476011202	476011438	ATPase E1-E2 type family protein / haloacid dehalogenase-like hydrolase family protein
	TRINITY_DN8186_c0_g1	5.66008	2.82e-18	2.99e-16	UP	NA	NA	NA	NA	NA	NA	NA	NA	NA	NA	NA
	TRINITY_DN111041_c0_g1	11.5998	2.98e-18	3.16e-16	UP	NA	NA	NA	NA	NA	NA	NA	NA	NA	NA	NA
	TRINITY_DN67247_c0_g1	10.2345	3.06e-18	3.24e-16	UP	NA	NA	NA	NA	NA	NA	NA	NA	NA	NA	NA
	TRINITY_DN43707_c0_g1	10.5345	3.13e-18	3.31e-16	UP	NA	NA	NA	NA	NA	NA	NA	NA	NA	NA	NA
	TRINITY_DN38275_c0_g1	7.12854	3.39e-18	3.58e-16	UP	TRINITY_DN38275_c0_g1	TraesCS3A01G352200.1	805	897	1371	5.51e-42	TraesCS3A01G352200	chr3A	600316860	600319906	Carboxypeptidase
	TRINITY_DN98434_c0_g1	13.9099	3.6e-18	3.8e-16	UP	TRINITY_DN98434_c0_g1	TraesCS1B01G148300.1	110	1	366	1.33e-41	TraesCS1B01G148300	chr1B	216473675	216474040	Major facilitator superfamily protein
	TRINITY_DN34068_c1_g1	14.2117	3.72e-18	3.92e-16	UP	NA	NA	NA	NA	NA	NA	NA	NA	NA	NA	NA
	TRINITY_DN69239_c1_g1	4.19699	3.73e-18	3.92e-16	UP	TRINITY_DN69239_c1_g1	TraesCS4D01G153000.1	1	232	363	3.04e-119	TraesCS4D01G153000	chr4D	190442388	190442750	Polynucleotidyl transferase, ribonuclease H-like superfamily protein
	TRINITY_DN102758_c1_g1	7.17679	3.8e-18	4e-16	UP	TRINITY_DN102758_c1_g1	TraesCS4A01G255700.1	502	228	1734	2.77e-138	TraesCS4A01G255700	chr4A	567493169	567495275	ethylene-dependent gravitropism-deficient and yellow-green-like 2
	TRINITY_DN694_c0_g1	8.0565	3.89e-18	4.08e-16	UP	TRINITY_DN694_c0_g1	TraesCS5A01G149700.1	1	275	426	3.04e-78	TraesCS5A01G149700	chr5A	327575915	327577750	rRNA processing protein-like protein
	TRINITY_DN46544_c0_g1	5.83729	3.89e-18	4.08e-16	UP	TRINITY_DN46544_c0_g1	TraesCS6B01G290500.1	1448	1118	1845	4.83e-61	TraesCS6B01G290500	chr6B	522640089	522643061	Protein NRT1/ PTR FAMILY 5.1
	TRINITY_DN14767_c0_g1	4.73785	3.91e-18	4.09e-16	UP	TRINITY_DN14767_c0_g1	TraesCS4D01G021200.1	1	109	708	3.74e-51	TraesCS4D01G021200	chr4D	9183905	9185152	RING finger protein
	TRINITY_DN14418_c0_g1	8.68386	4.17e-18	4.35e-16	UP	NA	NA	NA	NA	NA	NA	NA	NA	NA	NA	NA
	TRINITY_DN40437_c0_g1	4.83951	4.21e-18	4.38e-16	UP	TRINITY_DN40437_c0_g1	TraesCS5D01G105900.1	1161	2598	2598	0	TraesCS5D01G105900	chr5D	119706790	119710532	Respiratory burst oxidase, putative, expressed
	TRINITY_DN3274_c0_g1	8.68103	4.21e-18	4.38e-16	UP	TRINITY_DN3274_c0_g1	TraesCS4D01G035800.1	77	1155	1155	0	TraesCS4D01G035800	chr4D	16020765	16022120	Pre-mRNA-splicing factor 18
	TRINITY_DN64554_c0_g1	4.65547	4.27e-18	4.43e-16	UP	TRINITY_DN64554_c0_g1	TraesCS2A01G492500.1	131	589	747	0	TraesCS2A01G492500	chr2A	724745559	724746756	Oxidative stress 3, putative isoform 1
	TRINITY_DN98316_c0_g1	5.46534	4.57e-18	4.74e-16	UP	TRINITY_DN98316_c0_g1	TraesCS5B01G229600.1	1	274	954	3.35e-134	TraesCS5B01G229600	chr5B	406556940	406557893	Transmembrane protein 45B
	TRINITY_DN111_c0_g2	4.86102	4.59e-18	4.76e-16	UP	TRINITY_DN111_c0_g2	TraesCS4B01G001000.1	1	1005	1044	0	TraesCS4B01G001000	chr4B	639894	640937	Calcium-dependent lipid-binding domain protein
	TRINITY_DN11974_c0_g2	4.32518	4.79e-18	4.95e-16	UP	TRINITY_DN11974_c0_g2	TraesCS1D01G284000.1	1218	1601	1845	8.12e-180	TraesCS1D01G284000	chr1D	382234639	382237640	70 kDa heat shock protein
	TRINITY_DN5930_c2_g1	7.18327	5.01e-18	5.18e-16	UP	NA	NA	NA	NA	NA	NA	NA	NA	NA	NA	NA
	TRINITY_DN37011_c0_g1	10.6725	5.2e-18	5.36e-16	UP	NA	NA	NA	NA	NA	NA	NA	NA	NA	NA	NA
	TRINITY_DN384_c0_g6	8.23236	5.29e-18	5.44e-16	UP	TRINITY_DN384_c0_g6	TraesCS6A01G189200.1	801	849	987	2.05e-17	TraesCS6A01G189200	chr6A	235026920	235069583	magnesium transporter NIPA (DUF803)
	TRINITY_DN22360_c0_g1	6.40521	5.37e-18	5.52e-16	UP	TRINITY_DN22360_c0_g1	TraesCS6A01G042600.1	1408	1474	1998	4.18e-26	TraesCS6A01G042600	chr6A	22442891	22446356	Heat shock 70 kDa protein
	TRINITY_DN54686_c0_g1	6.78933	5.5e-18	5.65e-16	UP	NA	NA	NA	NA	NA	NA	NA	NA	NA	NA	NA
	TRINITY_DN5441_c1_g1	7.39628	5.57e-18	5.71e-16	UP	TRINITY_DN5441_c1_g1	TraesCSU01G130200.1	1797	966	1797	0	TraesCSU01G130200	chrUn	110528341	110530800	Protein NRT1/ PTR FAMILY 5.1
	TRINITY_DN50637_c0_g1	6.73799	5.65e-18	5.78e-16	UP	TRINITY_DN50637_c0_g1	TraesCS4B01G397600.1	794	902	2034	2.87e-49	TraesCS4B01G397600	chr4B	671739110	671743251	Chaperone DnaK
	TRINITY_DN1311_c0_g1	3.80463	5.68e-18	5.8e-16	UP	TRINITY_DN1311_c0_g1	TraesCS3D01G397700.1	1	207	297	2.88e-105	TraesCS3D01G397700	chr3D	512380443	512380871	Legume-specific protein
	TRINITY_DN256929_c0_g1	9.34697	5.74e-18	5.85e-16	UP	NA	NA	NA	NA	NA	NA	NA	NA	NA	NA	NA
	TRINITY_DN160554_c0_g1	8.14708	5.93e-18	6.04e-16	UP	TRINITY_DN160554_c0_g1	TraesCS3D01G046700.1	59	308	456	9.35e-118	TraesCS3D01G046700	chr3D	17591725	17592180	Heat shock protein
	TRINITY_DN11891_c0_g1	7.15248	6.27e-18	6.38e-16	UP	TRINITY_DN11891_c0_g1	TraesCS1B01G324100.1	381	548	747	6.42e-58	TraesCS1B01G324100	chr1B	549765757	549766589	Nucleotide-diphospho-sugar transferase family protein
	TRINITY_DN4447_c1_g1	8.45366	6.63e-18	6.73e-16	UP	TRINITY_DN4447_c1_g1	TraesCS1B01G439100.1	1312	1406	1419	4.93e-29	TraesCS1B01G439100	chr1B	660914516	660916771	Disease resistance protein (TIR-NBS-LRR class) family
	TRINITY_DN74957_c0_g1	6.81022	6.75e-18	6.85e-16	UP	NA	NA	NA	NA	NA	NA	NA	NA	NA	NA	NA
	TRINITY_DN40984_c0_g1	11.039	6.82e-18	6.91e-16	UP	NA	NA	NA	NA	NA	NA	NA	NA	NA	NA	NA
	TRINITY_DN34749_c0_g2	6.36788	7.04e-18	7.13e-16	UP	NA	NA	NA	NA	NA	NA	NA	NA	NA	NA	NA
	TRINITY_DN13441_c0_g1	3.79134	7.22e-18	7.3e-16	UP	TRINITY_DN13441_c0_g1	TraesCS5D01G445900.1	1	744	744	0	TraesCS5D01G445900	chr5D	496321692	496323250	Stem-specific protein TSJT1
	TRINITY_DN38029_c0_g1	3.57409	7.73e-18	7.81e-16	UP	TRINITY_DN38029_c0_g1	TraesCS7A01G484700.1	1	228	759	2.37e-100	TraesCS7A01G484700	chr7A	675577523	675578296	Erythronate-4-phosphate dehydrogenase family protein
	TRINITY_DN63364_c0_g1	7.21555	7.83e-18	7.89e-16	UP	NA	NA	NA	NA	NA	NA	NA	NA	NA	NA	NA
	TRINITY_DN73721_c2_g1	6.29875	7.84e-18	7.89e-16	UP	TRINITY_DN73721_c2_g1	TraesCS4B01G269200.2	1550	1612	1614	1.39e-23	TraesCS4B01G269200	chr4B	544038676	544043574	4-coumarate--CoA ligase family protein
	TRINITY_DN52499_c0_g1	10.1791	7.85e-18	7.89e-16	UP	TRINITY_DN52499_c0_g1	TraesCS6D01G366200.1	231	744	1038	0	TraesCS6D01G366200	chr6D	454825860	454827264	Cinnamoyl CoA reductase
	TRINITY_DN47512_c0_g2	13.0748	7.95e-18	7.99e-16	UP	NA	NA	NA	NA	NA	NA	NA	NA	NA	NA	NA
	TRINITY_DN2089_c0_g1	3.98756	8.02e-18	8.04e-16	UP	TRINITY_DN2089_c0_g1	TraesCS2B01G130000.1	159	219	312	2.1e-23	TraesCS2B01G130000	chr2B	97394475	97397147	Hypoxia-responsive family protein-like
	TRINITY_DN16292_c0_g1	4.45091	8.08e-18	8.1e-16	UP	TRINITY_DN16292_c0_g1	TraesCS5A01G482400.1	631	762	1146	1.89e-63	TraesCS5A01G482400	chr5A	654086402	654090003	Hsp70 nucleotide exchange factor fes1
	TRINITY_DN13438_c2_g1	5.79194	8.29e-18	8.29e-16	UP	TRINITY_DN13438_c2_g1	TraesCS6A01G083200.1	344	251	744	2e-42	TraesCS6A01G083200	chr6A	51947908	51953052	Bax inhibitor 1-like protein
	TRINITY_DN68641_c0_g1	10.3088	8.29e-18	8.29e-16	UP	TRINITY_DN68641_c0_g1	TraesCS6A01G379800.1	608	658	1344	1.5e-18	TraesCS6A01G379800	chr6A	600403258	600406136	COBRA-like protein
	TRINITY_DN20683_c0_g2	3.16052	8.5e-18	8.49e-16	UP	TRINITY_DN20683_c0_g2	TraesCS5D01G532200.1	350	717	717	1.62e-179	TraesCS5D01G532200	chr5D	547418156	547419160	Erythronate-4-phosphate dehydrogenase family protein, putative
	TRINITY_DN69675_c2_g1	4.65131	8.81e-18	8.78e-16	UP	TRINITY_DN69675_c2_g1	TraesCS7A01G251800.1	340	59	723	3.63e-147	TraesCS7A01G251800	chr7A	235480927	235481981	N-acetyl-gamma-glutamyl-phosphate reductase
	TRINITY_DN1767_c0_g1	5.32249	8.9e-18	8.86e-16	UP	TRINITY_DN1767_c0_g1	TraesCS6B01G174500.1	932	2976	2976	0	TraesCS6B01G174500	chr6B	189124934	189131078	ATP-dependent chaperone ClpB
	TRINITY_DN19717_c0_g1	3.1949	8.95e-18	8.9e-16	UP	TRINITY_DN19717_c0_g1	TraesCS2B01G184400.1	1	263	264	1.67e-134	TraesCS2B01G184400	chr2B	159319089	159319352	Chymotrypsin inhibitor
	TRINITY_DN34112_c0_g1	11.6504	9.47e-18	9.41e-16	UP	NA	NA	NA	NA	NA	NA	NA	NA	NA	NA	NA
	TRINITY_DN4063_c0_g1	4.35025	1e-17	9.92e-16	UP	TRINITY_DN4063_c0_g1	TraesCS4B01G278100.1	229	924	1026	0	TraesCS4B01G278100	chr4B	560012716	560014885	Heat shock transcription factor
	TRINITY_DN288_c0_g2	4.71382	1.04e-17	1.03e-15	UP	NA	NA	NA	NA	NA	NA	NA	NA	NA	NA	NA
	TRINITY_DN185669_c0_g1	10.5952	1.07e-17	1.06e-15	UP	NA	NA	NA	NA	NA	NA	NA	NA	NA	NA	NA
	TRINITY_DN3093_c0_g1	5.70493	1.07e-17	1.06e-15	UP	TRINITY_DN3093_c0_g1	TraesCS1B01G423600.1	46	251	1137	2.11e-103	TraesCS1B01G423600	chr1B	646189334	646191991	Chaperone protein dnaJ
	TRINITY_DN47602_c0_g2	10.2854	1.1e-17	1.08e-15	UP	TRINITY_DN47602_c0_g2	TraesCS1D01G376300.1	124	218	1140	7.14e-41	TraesCS1D01G376300	chr1D	452625415	452627557	Alcohol dehydrogenase
	TRINITY_DN9896_c0_g2	6.00357	1.2e-17	1.19e-15	UP	TRINITY_DN9896_c0_g2	TraesCS3D01G157300.1	140	210	210	2.49e-29	TraesCS3D01G157300	chr3D	125482328	125483973	Cx9C motif-containing protein 4, mitochondrial
	TRINITY_DN4200_c0_g1	3.78673	1.24e-17	1.23e-15	UP	TRINITY_DN4200_c0_g1	TraesCS7D01G413500.1	1	359	588	0	TraesCS7D01G413500	chr7D	531827089	531828040	6,7-dimethyl-8-ribityllumazine synthase
	TRINITY_DN25395_c0_g2	10.1474	1.28e-17	1.26e-15	UP	NA	NA	NA	NA	NA	NA	NA	NA	NA	NA	NA
	TRINITY_DN63987_c0_g1	5.3931	1.29e-17	1.27e-15	UP	TRINITY_DN63987_c0_g1	TraesCS2A01G259500.1	390	456	1554	2.49e-25	TraesCS2A01G259500	chr2A	407739441	407742618	Sugar transporter, putative
	TRINITY_DN7902_c2_g1	6.84157	1.29e-17	1.27e-15	UP	TRINITY_DN7902_c2_g1	TraesCS3B01G448600.1	812	1113	1113	4.02e-156	TraesCS3B01G448600	chr3B	689162982	689167756	O-methyltransferase
	TRINITY_DN36553_c0_g1	5.99334	1.39e-17	1.36e-15	UP	TRINITY_DN36553_c0_g1	TraesCS1D01G401500.1	1	267	267	9.14e-137	TraesCS1D01G401500	chr1D	467494685	467494951	Clavata3/ESR (CLE) gene family member
	TRINITY_DN4786_c0_g1	4.99947	1.43e-17	1.4e-15	UP	TRINITY_DN4786_c0_g1	TraesCS1D01G382900.1	1	186	1095	9.1e-92	TraesCS1D01G382900	chr1D	457849896	457852204	Heat shock transcription factor
	TRINITY_DN21452_c0_g2	10.9287	1.46e-17	1.43e-15	UP	NA	NA	NA	NA	NA	NA	NA	NA	NA	NA	NA
	TRINITY_DN15085_c0_g1	3.73487	1.55e-17	1.51e-15	UP	TRINITY_DN15085_c0_g1	TraesCS1D01G102400.1	132	1	759	7.23e-64	TraesCS1D01G102400	chr1D	90639927	90641876	Rubber elongation factor protein, putative
	TRINITY_DN21470_c0_g1	4.95104	1.56e-17	1.53e-15	UP	TRINITY_DN21470_c0_g1	TraesCS2A01G287700.1	618	307	663	2.38e-114	TraesCS2A01G287700	chr2A	491459630	491461700	Protein DYAD
	TRINITY_DN9202_c0_g2	4.56981	1.62e-17	1.58e-15	UP	TRINITY_DN9202_c0_g2	TraesCS4A01G097900.1	1	188	1956	3.12e-88	TraesCS4A01G097900	chr4A	109423673	109426774	70 kDa heat shock protein
	TRINITY_DN16661_c0_g1	8.29736	1.64e-17	1.6e-15	UP	TRINITY_DN16661_c0_g1	TraesCS2A01G166900.1	1980	1741	2172	1.32e-41	TraesCS2A01G166900	chr2A	119090049	119095698	Receptor-like protein kinase
	TRINITY_DN6521_c1_g1	5.26999	1.69e-17	1.64e-15	UP	TRINITY_DN6521_c1_g1	TraesCS5B01G503400.1	290	399	399	6.29e-48	TraesCS5B01G503400	chr5B	670019115	670020322	DNA polymerase epsilon catalytic subunit A, putative
	TRINITY_DN9021_c0_g3	11.1395	1.84e-17	1.78e-15	UP	TRINITY_DN9021_c0_g3	TraesCS4A01G163000.1	1121	1221	3354	2.13e-42	TraesCS4A01G163000	chr4A	362065937	362113687	Ubiquitin carboxyl-terminal hydrolase family protein, expressed
	TRINITY_DN37337_c0_g2	10.6296	1.86e-17	1.8e-15	UP	TRINITY_DN37337_c0_g2	TraesCS2A01G509100.1	223	120	1488	3.34e-39	TraesCS2A01G509100	chr2A	735173801	735181370	NADH-ubiquinone oxidoreductase chain 4
	TRINITY_DN6843_c0_g3	4.60865	1.87e-17	1.81e-15	UP	TRINITY_DN6843_c0_g3	TraesCS5B01G495500.1	948	1146	1146	9.02e-99	TraesCS5B01G495500	chr5B	662976884	662980348	Hsp70 nucleotide exchange factor fes1
	TRINITY_DN4243_c0_g2	9.58011	2.05e-17	1.98e-15	UP	NA	NA	NA	NA	NA	NA	NA	NA	NA	NA	NA
	TRINITY_DN54856_c0_g1	10.4595	2.1e-17	2.02e-15	UP	NA	NA	NA	NA	NA	NA	NA	NA	NA	NA	NA
	TRINITY_DN9908_c0_g1	4.54529	2.12e-17	2.04e-15	UP	TRINITY_DN9908_c0_g1	TraesCS7A01G553800.1	1037	1530	1530	0	TraesCS7A01G553800	chr7A	726481932	726485190	MYB-related protein
	TRINITY_DN13481_c0_g4	6.83594	2.18e-17	2.1e-15	UP	TRINITY_DN13481_c0_g4	TraesCS5D01G320800.1	239	1	597	3.2e-123	TraesCS5D01G320800	chr5D	412960326	412961366	Ethylene-responsive transcription factor
	TRINITY_DN38144_c0_g1	5.08244	2.31e-17	2.21e-15	UP	TRINITY_DN38144_c0_g1	TraesCS4D01G016500.1	362	992	1212	0	TraesCS4D01G016500	chr4D	7418933	7421443	Acetyltransferase, GNAT family protein, expressed
	TRINITY_DN6049_c0_g2	6.23409	2.33e-17	2.24e-15	UP	TRINITY_DN6049_c0_g2	TraesCS7A01G341300.1	1750	1810	1980	1.35e-23	TraesCS7A01G341300	chr7A	501069038	501081199	Ufm1-specific protease 2
	TRINITY_DN15543_c4_g1	8.50614	2.41e-17	2.3e-15	UP	NA	NA	NA	NA	NA	NA	NA	NA	NA	NA	NA
	TRINITY_DN34978_c0_g1	10.8336	2.42e-17	2.31e-15	UP	TRINITY_DN34978_c0_g1	TraesCS4B01G118400.1	163	211	588	5.08e-16	TraesCS4B01G118400	chr4B	138616215	138618321	Mediator of DNA damage checkpoint protein 1
	TRINITY_DN99420_c0_g1	4.18349	2.43e-17	2.32e-15	UP	TRINITY_DN99420_c0_g1	TraesCS3B01G397200.1	1	174	1530	3.95e-87	TraesCS3B01G397200	chr3B	627712400	627715416	Laccase
	TRINITY_DN1783_c2_g4	4.43717	2.45e-17	2.34e-15	UP	TRINITY_DN1783_c2_g4	TraesCS2A01G532100.1	67	258	258	3.19e-97	TraesCS2A01G532100	chr2A	748688522	748688779	Wound-responsive family protein
	TRINITY_DN7815_c0_g3	3.30599	2.5e-17	2.38e-15	UP	NA	NA	NA	NA	NA	NA	NA	NA	NA	NA	NA
	TRINITY_DN268_c0_g1	3.90677	2.55e-17	2.43e-15	UP	TRINITY_DN268_c0_g1	TraesCS7B01G168300.2	268	1125	1125	0	TraesCS7B01G168300	chr7B	235448977	235450208	Heat shock transcription factor
	TRINITY_DN6606_c5_g1	4.79733	2.61e-17	2.48e-15	UP	TRINITY_DN6606_c5_g1	TraesCS3D01G482500.1	1214	1246	1248	8.74e-09	TraesCS3D01G482500	chr3D	579726311	579732989	Crossover junction endonuclease mus81
	TRINITY_DN24382_c1_g1	11.2305	2.69e-17	2.56e-15	UP	NA	NA	NA	NA	NA	NA	NA	NA	NA	NA	NA
	TRINITY_DN22341_c0_g1	10.1004	2.73e-17	2.59e-15	UP	NA	NA	NA	NA	NA	NA	NA	NA	NA	NA	NA
	TRINITY_DN15700_c0_g1	11.3393	2.74e-17	2.59e-15	UP	NA	NA	NA	NA	NA	NA	NA	NA	NA	NA	NA
	TRINITY_DN20424_c0_g2	10.9669	2.74e-17	2.59e-15	UP	TRINITY_DN20424_c0_g2	TraesCS3A01G352300.1	349	427	510	3.86e-34	TraesCS3A01G352300	chr3A	600321687	600323239	ATP-dependent Clp protease adapter protein ClpS
	TRINITY_DN15680_c0_g1	4.98474	2.82e-17	2.67e-15	UP	TRINITY_DN15680_c0_g1	TraesCS5B01G336700.1	1	1305	1305	0	TraesCS5B01G336700	chr5B	520046384	520048383	Agmatine coumaroyltransferase-2
	TRINITY_DN35953_c0_g6	6.87769	2.84e-17	2.68e-15	UP	TRINITY_DN35953_c0_g6	TraesCS4B01G216600.1	1556	1621	3561	9.34e-27	TraesCS4B01G216600	chr4B	456382345	456396153	Replication factor C large subunit
	TRINITY_DN250231_c0_g1	12.0322	2.88e-17	2.72e-15	UP	NA	NA	NA	NA	NA	NA	NA	NA	NA	NA	NA
	TRINITY_DN65687_c0_g1	4.89605	2.92e-17	2.75e-15	UP	NA	NA	NA	NA	NA	NA	NA	NA	NA	NA	NA
	TRINITY_DN14625_c0_g1	4.18984	3e-17	2.82e-15	UP	TRINITY_DN14625_c0_g1	TraesCS5B01G249000.1	1330	1455	1614	2.27e-60	TraesCS5B01G249000	chr5B	431074368	431078699	Chaperone protein htpG family protein
	TRINITY_DN2085_c2_g1	12.0689	3.06e-17	2.87e-15	UP	TRINITY_DN2085_c2_g1	TraesCS2A01G489800.1	1820	1737	2658	5.06e-28	TraesCS2A01G489800	chr2A	723539088	723542524	Leucine-rich repeat receptor-like protein kinase family protein
	TRINITY_DN9465_c0_g1	3.84392	3.06e-17	2.87e-15	UP	TRINITY_DN9465_c0_g1	TraesCS1B01G159800.1	1	502	549	0	TraesCS1B01G159800	chr1B	272406583	272408298	RING finger protein
	TRINITY_DN24635_c1_g2	4.13766	3.24e-17	3.04e-15	UP	TRINITY_DN24635_c1_g2	TraesCS6B01G164700.2	1	70	690	8.92e-29	TraesCS6B01G164700	chr6B	171754698	171805703	Polyubiquitin
	TRINITY_DN25752_c0_g1	6.78019	3.31e-17	3.09e-15	UP	NA	NA	NA	NA	NA	NA	NA	NA	NA	NA	NA
	TRINITY_DN22099_c0_g1	9.3894	3.32e-17	3.1e-15	UP	TRINITY_DN22099_c0_g1	TraesCS2A01G244000.1	443	257	693	8.4e-90	TraesCS2A01G244000	chr2A	345477958	345495950	RNA-binding family protein
	TRINITY_DN7661_c0_g1	11.4237	3.33e-17	3.1e-15	UP	NA	NA	NA	NA	NA	NA	NA	NA	NA	NA	NA
	TRINITY_DN33081_c0_g1	7.24405	3.38e-17	3.15e-15	UP	TRINITY_DN33081_c0_g1	TraesCS1A01G065000.1	898	936	1020	4.11e-12	TraesCS1A01G065000	chr1A	47209815	47211960	Importin subunit beta-1
	TRINITY_DN42439_c0_g1	10.1063	3.54e-17	3.3e-15	UP	TRINITY_DN42439_c0_g1	TraesCS7D01G266900.1	1108	1024	1116	1.94e-27	TraesCS7D01G266900	chr7D	249606242	249621410	F-box protein
	TRINITY_DN22592_c0_g2	7.63922	3.67e-17	3.41e-15	UP	NA	NA	NA	NA	NA	NA	NA	NA	NA	NA	NA
	TRINITY_DN13771_c0_g7	8.96959	3.78e-17	3.5e-15	UP	TRINITY_DN13771_c0_g7	TraesCS6A01G374800.1	1	52	321	1.12e-17	TraesCS6A01G374800	chr6A	597362227	597362547	L-arabinose isomerase
	TRINITY_DN59293_c0_g1	11.3994	4.25e-17	3.93e-15	UP	TRINITY_DN59293_c0_g1	TraesCS4A01G087800.1	3184	3256	3840	4.45e-31	TraesCS4A01G087800	chr4A	92725327	92740345	Replication factor C large subunit
	TRINITY_DN31308_c0_g1	10.2587	4.28e-17	3.97e-15	UP	TRINITY_DN31308_c0_g1	TraesCS7B01G149300.1	223	1	1794	2.28e-113	TraesCS7B01G149300	chr7B	196911352	196913145	Pentatricopeptide repeat-containing protein
	TRINITY_DN15700_c0_g2	11.0442	4.31e-17	3.99e-15	UP	TRINITY_DN15700_c0_g2	TraesCS6B01G423700.1	1	292	450	4.22e-109	TraesCS6B01G423700	chr6B	693473689	693474138	PPPDE peptidase domain-containing 2
	TRINITY_DN114794_c0_g1	3.63373	4.36e-17	4.02e-15	UP	TRINITY_DN114794_c0_g1	TraesCS2A01G121200.1	3	62	474	4.9e-22	TraesCS2A01G121200	chr2A	70984323	70986598	Superoxide dismutase [Cu-Zn]
	TRINITY_DN46629_c0_g1	4.89917	4.43e-17	4.08e-15	UP	TRINITY_DN46629_c0_g1	TraesCS4B01G361200.1	92	834	834	0	TraesCS4B01G361200	chr4B	650705778	650707007	LOB domain-containing protein
	TRINITY_DN2359_c0_g2	4.03889	4.51e-17	4.16e-15	UP	TRINITY_DN2359_c0_g2	TraesCS7A01G242200.1	1930	2103	2103	2.3e-79	TraesCS7A01G242200	chr7A	217555694	217559742	Heat shock protein 90
	TRINITY_DN13771_c0_g2	11.366	4.72e-17	4.34e-15	UP	NA	NA	NA	NA	NA	NA	NA	NA	NA	NA	NA
	TRINITY_DN122023_c0_g1	6.37936	4.98e-17	4.58e-15	UP	TRINITY_DN122023_c0_g1	TraesCS1A01G225100.1	676	403	5469	2.4e-141	TraesCS1A01G225100	chr1A	395182470	395206693	Anaphase-promoting complex subunit 1
	TRINITY_DN47512_c1_g1	10.0641	4.99e-17	4.58e-15	UP	NA	NA	NA	NA	NA	NA	NA	NA	NA	NA	NA
	TRINITY_DN2485_c0_g1	3.24855	5.29e-17	4.85e-15	UP	TRINITY_DN2485_c0_g1	TraesCS3D01G246600.1	119	411	411	5.94e-153	TraesCS3D01G246600	chr3D	345526696	345527727	Zinc finger A20 and AN1 domain stress-associated protein
	TRINITY_DN96442_c0_g1	7.73176	5.4e-17	4.95e-15	UP	NA	NA	NA	NA	NA	NA	NA	NA	NA	NA	NA
	TRINITY_DN94651_c1_g1	12.5965	5.64e-17	5.16e-15	UP	NA	NA	NA	NA	NA	NA	NA	NA	NA	NA	NA
	TRINITY_DN1889_c0_g1	3.34159	5.77e-17	5.27e-15	UP	TRINITY_DN1889_c0_g1	TraesCSU01G018900.1	1	134	753	5.2e-27	TraesCSU01G018900	chrUn	20705441	20706193	Polyubiquitin
	TRINITY_DN30139_c0_g2	4.38769	5.87e-17	5.36e-15	UP	NA	NA	NA	NA	NA	NA	NA	NA	NA	NA	NA
	TRINITY_DN10970_c0_g2	7.02747	5.89e-17	5.37e-15	UP	NA	NA	NA	NA	NA	NA	NA	NA	NA	NA	NA
	TRINITY_DN4243_c54_g1	9.09709	5.9e-17	5.38e-15	UP	TRINITY_DN4243_c54_g1	TraesCS2D01G205300.1	4305	3085	4305	0	TraesCS2D01G205300	chr2D	157119913	157124217	Retrovirus-related Pol polyprotein from transposon TNT 1-94
	TRINITY_DN41975_c0_g1	4.64549	6.02e-17	5.48e-15	UP	TRINITY_DN41975_c0_g1	TraesCS3A01G061600.1	1	968	1545	0	TraesCS3A01G061600	chr3A	36920288	36922275	Cytochrome P450
	TRINITY_DN8666_c1_g1	8.68095	6.24e-17	5.67e-15	UP	NA	NA	NA	NA	NA	NA	NA	NA	NA	NA	NA
	TRINITY_DN59183_c0_g1	8.42152	6.25e-17	5.68e-15	UP	NA	NA	NA	NA	NA	NA	NA	NA	NA	NA	NA
	TRINITY_DN288_c3_g2	4.70652	6.63e-17	6.01e-15	UP	NA	NA	NA	NA	NA	NA	NA	NA	NA	NA	NA
	TRINITY_DN18001_c0_g1	5.20777	6.96e-17	6.3e-15	UP	NA	NA	NA	NA	NA	NA	NA	NA	NA	NA	NA
	TRINITY_DN17397_c0_g1	4.92054	7.02e-17	6.35e-15	UP	NA	NA	NA	NA	NA	NA	NA	NA	NA	NA	NA
	TRINITY_DN1687_c0_g1	2.94531	7.28e-17	6.57e-15	UP	TRINITY_DN1687_c0_g1	TraesCS1D01G402000.1	95	1596	1596	0	TraesCS1D01G402000	chr1D	467596233	467599384	Structural constituent of cell wall
	TRINITY_DN899_c0_g1	3.20041	7.29e-17	6.57e-15	UP	TRINITY_DN899_c0_g1	TraesCS4B01G213400.1	293	969	969	0	TraesCS4B01G213400	chr4B	451902491	451904145	RNA-binding family protein
	TRINITY_DN122349_c0_g1	10.2292	7.4e-17	6.67e-15	UP	NA	NA	NA	NA	NA	NA	NA	NA	NA	NA	NA
	TRINITY_DN154403_c0_g1	8.50862	7.47e-17	6.73e-15	UP	NA	NA	NA	NA	NA	NA	NA	NA	NA	NA	NA
	TRINITY_DN288_c0_g6	5.30569	7.5e-17	6.74e-15	UP	NA	NA	NA	NA	NA	NA	NA	NA	NA	NA	NA
	TRINITY_DN641_c0_g1	4.31787	7.59e-17	6.81e-15	UP	TRINITY_DN641_c0_g1	TraesCS2B01G087400.1	1	370	894	0	TraesCS2B01G087400	chr2B	49382830	49384467	Peroxidase family protein
	TRINITY_DN62865_c0_g1	10.0943	7.62e-17	6.83e-15	UP	NA	NA	NA	NA	NA	NA	NA	NA	NA	NA	NA
	TRINITY_DN63897_c1_g1	11.4713	8.35e-17	7.48e-15	UP	NA	NA	NA	NA	NA	NA	NA	NA	NA	NA	NA
	TRINITY_DN5245_c2_g4	11.6905	8.47e-17	7.58e-15	UP	NA	NA	NA	NA	NA	NA	NA	NA	NA	NA	NA
	TRINITY_DN26381_c0_g2	4.84754	8.51e-17	7.6e-15	UP	TRINITY_DN26381_c0_g2	TraesCS4A01G328600.1	490	358	1257	1.7e-64	TraesCS4A01G328600	chr4A	614106743	614108525	Ankyrin repeat domain protein, putative
	TRINITY_DN47754_c0_g1	10.6115	8.87e-17	7.91e-15	UP	NA	NA	NA	NA	NA	NA	NA	NA	NA	NA	NA
	TRINITY_DN14761_c0_g4	12.2205	9.18e-17	8.19e-15	UP	NA	NA	NA	NA	NA	NA	NA	NA	NA	NA	NA
	TRINITY_DN18513_c0_g1	6.09568	9.48e-17	8.44e-15	UP	TRINITY_DN18513_c0_g1	TraesCS1B01G368400.1	1	298	909	3.05e-149	TraesCS1B01G368400	chr1B	598843666	598844574	Acidic chitinase
	TRINITY_DN14219_c0_g3	8.74494	9.49e-17	8.44e-15	UP	NA	NA	NA	NA	NA	NA	NA	NA	NA	NA	NA
	TRINITY_DN15470_c1_g1	5.13084	1.02e-16	9.04e-15	UP	TRINITY_DN15470_c1_g1	TraesCS7B01G064100.1	1	106	660	2.83e-49	TraesCS7B01G064100	chr7B	69786320	69787558	Chaperone protein dnaJ
	TRINITY_DN71588_c1_g1	3.62475	1.03e-16	9.16e-15	UP	TRINITY_DN71588_c1_g1	TraesCS5A01G251000.1	444	594	2346	5.55e-71	TraesCS5A01G251000	chr5A	466613864	466618092	Chaperone protein htpG family protein
	TRINITY_DN68801_c0_g2	9.50776	1.08e-16	9.55e-15	UP	NA	NA	NA	NA	NA	NA	NA	NA	NA	NA	NA
	TRINITY_DN50223_c1_g1	3.90396	1.08e-16	9.55e-15	UP	TRINITY_DN50223_c1_g1	TraesCS2A01G248600.1	364	160	597	3.51e-101	TraesCS2A01G248600	chr2A	372371269	372371865	Cytidylate kinase
	TRINITY_DN41310_c0_g1	6.41853	1.09e-16	9.66e-15	UP	TRINITY_DN41310_c0_g1	TraesCS6D01G174300.1	168	128	3066	2.1e-11	TraesCS6D01G174300	chr6D	163334741	163337886	Receptor-like protein kinase
	TRINITY_DN32631_c2_g1	10.2015	1.11e-16	9.79e-15	UP	NA	NA	NA	NA	NA	NA	NA	NA	NA	NA	NA
	TRINITY_DN15770_c0_g1	8.53962	1.22e-16	1.07e-14	UP	TRINITY_DN15770_c0_g1	TraesCS3A01G193500.1	249	331	789	8.43e-36	TraesCS3A01G193500	chr3A	264024606	264049013	2,3,4,5-tetrahydropyridine-2,6-dicarboxylate N-acetyltransferase
	TRINITY_DN28383_c1_g2	7.50662	1.26e-16	1.11e-14	UP	NA	NA	NA	NA	NA	NA	NA	NA	NA	NA	NA
	TRINITY_DN16239_c0_g1	4.50342	1.35e-16	1.18e-14	UP	NA	NA	NA	NA	NA	NA	NA	NA	NA	NA	NA
	TRINITY_DN7257_c0_g1	5.87751	1.37e-16	1.2e-14	UP	NA	NA	NA	NA	NA	NA	NA	NA	NA	NA	NA
	TRINITY_DN7048_c2_g1	10.036	1.38e-16	1.21e-14	UP	NA	NA	NA	NA	NA	NA	NA	NA	NA	NA	NA
	TRINITY_DN15543_c0_g3	9.22647	1.41e-16	1.23e-14	UP	NA	NA	NA	NA	NA	NA	NA	NA	NA	NA	NA
	TRINITY_DN10325_c0_g1	7.3088	1.42e-16	1.24e-14	UP	TRINITY_DN10325_c0_g1	TraesCS2A01G365600.1	257	317	1251	1.38e-13	TraesCS2A01G365600	chr2A	610235586	610237974	BTB/POZ domain-containing protein
	TRINITY_DN12694_c0_g1	7.2588	1.47e-16	1.28e-14	UP	TRINITY_DN12694_c0_g1	TraesCS3D01G210700.10	479	269	3636	1.59e-102	TraesCS3D01G210700	chr3D	279901493	279934562	WD40 repeat-like protein
	TRINITY_DN64551_c1_g1	7.23318	1.47e-16	1.28e-14	UP	TRINITY_DN64551_c1_g1	TraesCS1D01G371300.1	271	845	966	4.07e-119	TraesCS1D01G371300	chr1D	449648450	449649636	6,7-dimethyl-8-ribityllumazine synthase
	TRINITY_DN24359_c0_g1	13.9792	1.5e-16	1.31e-14	UP	NA	NA	NA	NA	NA	NA	NA	NA	NA	NA	NA
	TRINITY_DN11625_c1_g3	4.39186	1.53e-16	1.33e-14	UP	NA	NA	NA	NA	NA	NA	NA	NA	NA	NA	NA
	TRINITY_DN44058_c0_g1	5.715	1.6e-16	1.39e-14	UP	NA	NA	NA	NA	NA	NA	NA	NA	NA	NA	NA
	TRINITY_DN32587_c0_g1	6.64626	1.65e-16	1.43e-14	UP	NA	NA	NA	NA	NA	NA	NA	NA	NA	NA	NA
	TRINITY_DN105777_c0_g1	7.57647	1.69e-16	1.46e-14	UP	NA	NA	NA	NA	NA	NA	NA	NA	NA	NA	NA
	TRINITY_DN12541_c0_g1	4.66044	1.69e-16	1.46e-14	UP	TRINITY_DN12541_c0_g1	TraesCS1A01G021100.1	61	1346	1380	0	TraesCS1A01G021100	chr1A	10150917	10152296	Anthocyanin 5-aromatic acyltransferase
	TRINITY_DN81690_c0_g1	5.32895	1.71e-16	1.48e-14	UP	NA	NA	NA	NA	NA	NA	NA	NA	NA	NA	NA
	TRINITY_DN28821_c1_g1	13.0448	1.72e-16	1.48e-14	UP	TRINITY_DN28821_c1_g1	TraesCS7A01G188300.1	1337	1473	2055	1.5e-66	TraesCS7A01G188300	chr7A	144603264	144605405	ATP-dependent zinc metalloprotease FTSH protein
	TRINITY_DN8317_c0_g3	12.3621	1.75e-16	1.51e-14	UP	NA	NA	NA	NA	NA	NA	NA	NA	NA	NA	NA
	TRINITY_DN10366_c0_g2	5.9002	1.75e-16	1.51e-14	UP	TRINITY_DN10366_c0_g2	TraesCS2A01G401600.1	1	214	888	2.48e-109	TraesCS2A01G401600	chr2A	655218650	655219623	Heat stress transcription factor
	TRINITY_DN67509_c1_g1	9.9918	1.76e-16	1.52e-14	UP	TRINITY_DN67509_c1_g1	TraesCS5D01G063800.1	1942	1722	2121	2.25e-113	TraesCS5D01G063800	chr5D	59043061	59045181	Kinase, putative
	TRINITY_DN79102_c0_g1	10.3404	1.84e-16	1.58e-14	UP	NA	NA	NA	NA	NA	NA	NA	NA	NA	NA	NA
	TRINITY_DN8972_c0_g2	12.984	1.84e-16	1.58e-14	UP	NA	NA	NA	NA	NA	NA	NA	NA	NA	NA	NA
	TRINITY_DN8367_c0_g1	9.40529	1.89e-16	1.63e-14	UP	NA	NA	NA	NA	NA	NA	NA	NA	NA	NA	NA
	TRINITY_DN105416_c1_g1	3.55727	1.95e-16	1.67e-14	UP	TRINITY_DN105416_c1_g1	TraesCS7B01G149200.1	1205	1452	2103	1.17e-121	TraesCS7B01G149200	chr7B	196904882	196908870	Heat shock protein 90
	TRINITY_DN9768_c0_g1	10.4436	2.08e-16	1.78e-14	UP	NA	NA	NA	NA	NA	NA	NA	NA	NA	NA	NA
	TRINITY_DN50073_c0_g1	10.3464	2.11e-16	1.81e-14	UP	NA	NA	NA	NA	NA	NA	NA	NA	NA	NA	NA
	TRINITY_DN26873_c0_g4	4.09145	2.12e-16	1.82e-14	UP	TRINITY_DN26873_c0_g4	TraesCS2B01G531300.1	1	426	531	0	TraesCS2B01G531300	chr2B	726684952	726686605	Heat-shock protein, putative
	TRINITY_DN15885_c0_g1	6.91582	2.13e-16	1.82e-14	UP	TRINITY_DN15885_c0_g1	TraesCS1D01G312400.1	104	432	432	5.82e-116	TraesCS1D01G312400	chr1D	408249561	408250210	SOSS complex subunit B-like protein
	TRINITY_DN18507_c0_g1	4.76474	2.18e-16	1.86e-14	UP	NA	NA	NA	NA	NA	NA	NA	NA	NA	NA	NA
	TRINITY_DN100809_c0_g4	10.2239	2.18e-16	1.86e-14	UP	TRINITY_DN100809_c0_g4	TraesCS5D01G107700.1	97	1	1209	2.5e-37	TraesCS5D01G107700	chr5D	121081723	121083206	Retrovirus-related Pol polyprotein from transposon TNT 1-94
	TRINITY_DN79102_c0_g2	10.9323	2.21e-16	1.88e-14	UP	NA	NA	NA	NA	NA	NA	NA	NA	NA	NA	NA
	TRINITY_DN8138_c0_g2	12.5617	2.22e-16	1.89e-14	UP	NA	NA	NA	NA	NA	NA	NA	NA	NA	NA	NA
	TRINITY_DN3636_c0_g3	10.127	2.22e-16	1.89e-14	UP	TRINITY_DN3636_c0_g3	TraesCS5D01G074200.1	1	119	282	4.99e-45	TraesCS5D01G074200	chr5D	73399370	73400010	zinc finger WD40 repeat protein 1
	TRINITY_DN289_c2_g1	9.61201	2.29e-16	1.94e-14	UP	NA	NA	NA	NA	NA	NA	NA	NA	NA	NA	NA
	TRINITY_DN30022_c1_g1	10.8806	2.33e-16	1.98e-14	UP	TRINITY_DN30022_c1_g1	TraesCS1B01G065400.1	17	76	396	2.51e-23	TraesCS1B01G065400	chr1B	49795827	49796222	26S proteasome non-ATPase regulatory subunit-like protein
	TRINITY_DN181577_c0_g1	9.96905	2.46e-16	2.08e-14	UP	NA	NA	NA	NA	NA	NA	NA	NA	NA	NA	NA
	TRINITY_DN4461_c0_g1	4.69824	2.52e-16	2.13e-14	UP	NA	NA	NA	NA	NA	NA	NA	NA	NA	NA	NA
	TRINITY_DN24923_c0_g1	10.5796	2.52e-16	2.13e-14	UP	NA	NA	NA	NA	NA	NA	NA	NA	NA	NA	NA
	TRINITY_DN2394_c1_g2	8.59158	2.58e-16	2.18e-14	UP	NA	NA	NA	NA	NA	NA	NA	NA	NA	NA	NA
	TRINITY_DN83253_c0_g1	9.96894	2.61e-16	2.2e-14	UP	NA	NA	NA	NA	NA	NA	NA	NA	NA	NA	NA
	TRINITY_DN27384_c1_g2	6.68154	2.65e-16	2.23e-14	UP	NA	NA	NA	NA	NA	NA	NA	NA	NA	NA	NA
	TRINITY_DN82580_c0_g1	8.97923	2.66e-16	2.23e-14	UP	NA	NA	NA	NA	NA	NA	NA	NA	NA	NA	NA
	TRINITY_DN989_c0_g1	3.86215	2.7e-16	2.27e-14	UP	TRINITY_DN989_c0_g1	TraesCS3A01G368800.1	1	1404	1404	0	TraesCS3A01G368800	chr3A	619098358	619099761	Nematode resistance protein-like HSPRO2
	TRINITY_DN3361_c0_g1	3.02958	2.73e-16	2.29e-14	UP	NA	NA	NA	NA	NA	NA	NA	NA	NA	NA	NA
	TRINITY_DN9870_c0_g1	14.0691	2.85e-16	2.39e-14	UP	NA	NA	NA	NA	NA	NA	NA	NA	NA	NA	NA
	TRINITY_DN17542_c0_g3	7.11288	3.09e-16	2.58e-14	UP	NA	NA	NA	NA	NA	NA	NA	NA	NA	NA	NA
	TRINITY_DN3106_c1_g2	10.7194	3.18e-16	2.65e-14	UP	NA	NA	NA	NA	NA	NA	NA	NA	NA	NA	NA
	TRINITY_DN34569_c0_g1	10.8434	3.25e-16	2.71e-14	UP	NA	NA	NA	NA	NA	NA	NA	NA	NA	NA	NA
	TRINITY_DN852_c1_g1	10.0427	3.39e-16	2.82e-14	UP	NA	NA	NA	NA	NA	NA	NA	NA	NA	NA	NA
	TRINITY_DN14951_c0_g1	3.91569	3.47e-16	2.88e-14	UP	NA	NA	NA	NA	NA	NA	NA	NA	NA	NA	NA
	TRINITY_DN34533_c0_g1	10.9257	3.57e-16	2.96e-14	UP	NA	NA	NA	NA	NA	NA	NA	NA	NA	NA	NA
	TRINITY_DN69567_c0_g1	9.94932	3.7e-16	3.07e-14	UP	NA	NA	NA	NA	NA	NA	NA	NA	NA	NA	NA
	TRINITY_DN44644_c0_g1	12.109	3.71e-16	3.07e-14	UP	NA	NA	NA	NA	NA	NA	NA	NA	NA	NA	NA
	TRINITY_DN53385_c0_g1	3.74497	3.93e-16	3.25e-14	UP	TRINITY_DN53385_c0_g1	TraesCS7A01G242200.1	1390	1623	2103	1.45e-115	TraesCS7A01G242200	chr7A	217555694	217559742	Heat shock protein 90
	TRINITY_DN495_c0_g1	5.32915	3.98e-16	3.28e-14	UP	TRINITY_DN495_c0_g1	TraesCS4A01G087800.1	2078	3840	3840	0	TraesCS4A01G087800	chr4A	92725327	92740345	Replication factor C large subunit
	TRINITY_DN113048_c2_g1	10.036	3.99e-16	3.3e-14	UP	TRINITY_DN113048_c2_g1	TraesCS1B01G029700.1	2621	2684	2691	1.26e-15	TraesCS1B01G029700	chr1B	14609435	14626525	TIR-NBS-LRR class disease resistance protein
	TRINITY_DN61507_c1_g1	8.74267	4.05e-16	3.34e-14	UP	NA	NA	NA	NA	NA	NA	NA	NA	NA	NA	NA
	TRINITY_DN54308_c0_g1	10.4549	4.06e-16	3.34e-14	UP	NA	NA	NA	NA	NA	NA	NA	NA	NA	NA	NA
	TRINITY_DN14054_c0_g1	5.84731	4.16e-16	3.43e-14	UP	TRINITY_DN14054_c0_g1	TraesCS7D01G179600.1	274	451	705	2.25e-85	TraesCS7D01G179600	chr7D	133193721	133194791	Heat-shock protein, putative
	TRINITY_DN33782_c0_g1	5.95864	4.17e-16	3.43e-14	UP	NA	NA	NA	NA	NA	NA	NA	NA	NA	NA	NA
	TRINITY_DN58791_c0_g2	11.4949	4.21e-16	3.45e-14	UP	TRINITY_DN58791_c0_g2	TraesCS7B01G064000.1	48	102	639	3.99e-21	TraesCS7B01G064000	chr7B	69763149	69764237	Chaperone protein dnaJ
	TRINITY_DN38868_c0_g2	6.33271	4.25e-16	3.49e-14	UP	TRINITY_DN38868_c0_g2	TraesCS1A01G038800.1	3	291	291	1.14e-93	TraesCS1A01G038800	chr1A	21085585	21085875	UDP-N-acetylenolpyruvoylglucosamine reductase
	TRINITY_DN19576_c0_g1	6.64367	4.28e-16	3.5e-14	UP	TRINITY_DN19576_c0_g1	TraesCS7A01G284700.1	853	905	1077	5.9e-20	TraesCS7A01G284700	chr7A	324923899	324926230	Activator of 90 kDa heat shock ATPase-like protein
	TRINITY_DN45261_c0_g6	6.70856	4.44e-16	3.63e-14	UP	TRINITY_DN45261_c0_g6	TraesCS1B01G121600.1	365	446	1935	6.45e-32	TraesCS1B01G121600	chr1B	144926426	144931878	Glucan 1,3-beta-glucosidase
	TRINITY_DN6637_c0_g1	3.63631	4.45e-16	3.63e-14	UP	TRINITY_DN6637_c0_g1	TraesCS3D01G356500.2	56	1506	1506	0	TraesCS3D01G356500	chr3D	468950458	468954757	Regulator of chromosome condensation (RCC1) family protein
	TRINITY_DN48026_c0_g1	9.96599	4.55e-16	3.71e-14	UP	TRINITY_DN48026_c0_g1	TraesCS3A01G260000.1	276	334	768	2.39e-23	TraesCS3A01G260000	chr3A	482403327	482406664	Arginine/serine-rich splicing factor, putative
	TRINITY_DN22544_c0_g2	3.79108	4.66e-16	3.79e-14	UP	TRINITY_DN22544_c0_g2	TraesCS3B01G497900.1	1	763	1116	0	TraesCS3B01G497900	chr3B	741502941	741504142	2-oxoglutarate (2OG) and Fe(II)-dependent oxygenase superfamily protein
	TRINITY_DN127874_c0_g1	6.19553	4.8e-16	3.91e-14	UP	TRINITY_DN127874_c0_g1	TraesCS2D01G245600.2	2766	2793	2796	4.93e-06	TraesCS2D01G245600	chr2D	282920455	282934954	DNA damage-binding protein
	TRINITY_DN4156_c2_g1	3.30847	4.86e-16	3.95e-14	UP	TRINITY_DN4156_c2_g1	TraesCS2D01G502700.1	1	92	495	1.64e-41	TraesCS2D01G502700	chr2D	596252301	596254507	Universal stress family protein
	TRINITY_DN34401_c0_g2	6.76186	5.11e-16	4.15e-14	UP	TRINITY_DN34401_c0_g2	TraesCS6A01G013700.1	2788	2845	2859	1.48e-22	TraesCS6A01G013700	chr6A	6727602	6735225	Ubiquitin family protein
	TRINITY_DN35154_c0_g1	4.81133	5.14e-16	4.17e-14	UP	TRINITY_DN35154_c0_g1	TraesCS4A01G369300.1	41	405	405	0	TraesCS4A01G369300	chr4A	641480727	641481556	DNA polymerase epsilon catalytic subunit A, putative
	TRINITY_DN59743_c0_g1	4.23315	5.15e-16	4.17e-14	UP	NA	NA	NA	NA	NA	NA	NA	NA	NA	NA	NA
	TRINITY_DN18132_c0_g1	4.64477	5.33e-16	4.31e-14	UP	TRINITY_DN18132_c0_g1	TraesCS3A01G331300.1	1	1299	1299	0	TraesCS3A01G331300	chr3A	575870203	575872143	Auxin efflux carrier component
	TRINITY_DN53627_c0_g1	11.5087	5.34e-16	4.31e-14	UP	NA	NA	NA	NA	NA	NA	NA	NA	NA	NA	NA
	TRINITY_DN6331_c0_g1	5.68789	5.4e-16	4.36e-14	UP	TRINITY_DN6331_c0_g1	TraesCS3B01G247200.1	341	576	576	2.06e-117	TraesCS3B01G247200	chr3B	393227665	393229669	Chaperone protein DnaJ
	TRINITY_DN43997_c0_g1	4.38384	5.53e-16	4.46e-14	UP	NA	NA	NA	NA	NA	NA	NA	NA	NA	NA	NA
	TRINITY_DN20302_c0_g1	8.12078	5.54e-16	4.47e-14	UP	NA	NA	NA	NA	NA	NA	NA	NA	NA	NA	NA
	TRINITY_DN18117_c1_g1	7.34573	5.6e-16	4.51e-14	UP	TRINITY_DN18117_c1_g1	TraesCS4A01G066100.1	1623	1755	1755	2.1e-59	TraesCS4A01G066100	chr4A	63527916	63530782	Heat shock 70 kDa protein
	TRINITY_DN110899_c0_g1	3.7378	5.63e-16	4.53e-14	UP	NA	NA	NA	NA	NA	NA	NA	NA	NA	NA	NA
	TRINITY_DN19099_c0_g2	11.9765	5.76e-16	4.62e-14	UP	NA	NA	NA	NA	NA	NA	NA	NA	NA	NA	NA
	TRINITY_DN105841_c0_g3	8.91186	5.76e-16	4.62e-14	UP	NA	NA	NA	NA	NA	NA	NA	NA	NA	NA	NA
	TRINITY_DN17562_c0_g4	3.56232	5.84e-16	4.68e-14	UP	TRINITY_DN17562_c0_g4	TraesCS6A01G365500.1	343	474	474	1.43e-63	TraesCS6A01G365500	chr6A	593732776	593733550	Serine-rich protein
	TRINITY_DN86131_c2_g1	8.78965	6.19e-16	4.96e-14	UP	TRINITY_DN86131_c2_g1	TraesCS3A01G203800.1	675	1	675	0	TraesCS3A01G203800	chr3A	353167954	353168628	Retrovirus-related Pol polyprotein from transposon TNT 1-94
	TRINITY_DN54480_c0_g3	3.87405	6.23e-16	4.98e-14	UP	TRINITY_DN54480_c0_g3	TraesCS2A01G524900.1	771	564	1239	5.35e-81	TraesCS2A01G524900	chr2A	745426103	745427424	Anthocyanin 5-aromatic acyltransferase
	TRINITY_DN64415_c0_g1	9.28249	6.31e-16	5.03e-14	UP	NA	NA	NA	NA	NA	NA	NA	NA	NA	NA	NA
	TRINITY_DN9550_c2_g2	6.33189	6.47e-16	5.15e-14	UP	TRINITY_DN9550_c2_g2	TraesCS5A01G176500.1	231	273	300	3.57e-07	TraesCS5A01G176500	chr5A	371031555	371032032	MYB-related transcription factor
	TRINITY_DN8349_c0_g3	4.75326	6.83e-16	5.43e-14	UP	TRINITY_DN8349_c0_g3	TraesCS1D01G382900.1	560	337	1095	1.07e-111	TraesCS1D01G382900	chr1D	457849896	457852204	Heat shock transcription factor
	TRINITY_DN107398_c0_g1	10.4651	7.01e-16	5.57e-14	UP	NA	NA	NA	NA	NA	NA	NA	NA	NA	NA	NA
	TRINITY_DN9174_c0_g1	3.29929	7.04e-16	5.59e-14	UP	NA	NA	NA	NA	NA	NA	NA	NA	NA	NA	NA
	TRINITY_DN56840_c0_g1	8.55963	7.06e-16	5.6e-14	UP	TRINITY_DN56840_c0_g1	TraesCS5A01G314700.1	1146	1189	1191	1.54e-14	TraesCS5A01G314700	chr5A	525078041	525079362	Heat shock transcription factor
	TRINITY_DN6193_c0_g1	3.61117	7.27e-16	5.76e-14	UP	TRINITY_DN6193_c0_g1	TraesCS2D01G177100.1	1	984	984	0	TraesCS2D01G177100	chr2D	120565102	120566185	SPX domain-containing protein
	TRINITY_DN10330_c0_g1	4.94108	7.31e-16	5.78e-14	UP	TRINITY_DN10330_c0_g1	TraesCS2B01G430000.1	989	1063	1560	3.68e-32	TraesCS2B01G430000	chr2B	617930974	617934347	Glycerol-3-phosphate transporter, putative
	TRINITY_DN26749_c0_g1	6.29954	7.7e-16	6.09e-14	UP	TRINITY_DN26749_c0_g1	TraesCS3A01G073300.1	37	99	762	1.75e-23	TraesCS3A01G073300	chr3A	45570000	45573025	Triosephosphate isomerase
	TRINITY_DN13200_c1_g2	7.14787	7.7e-16	6.09e-14	UP	NA	NA	NA	NA	NA	NA	NA	NA	NA	NA	NA
	TRINITY_DN62509_c0_g1	10.9019	7.91e-16	6.25e-14	UP	TRINITY_DN62509_c0_g1	TraesCS1D01G383100.1	9	68	552	6.96e-24	TraesCS1D01G383100	chr1D	457879101	457881061	1,2-dihydroxy-3-keto-5-methylthiopentene dioxygenase
	TRINITY_DN71293_c0_g3	9.94621	7.92e-16	6.25e-14	UP	TRINITY_DN71293_c0_g3	TraesCS4B01G379800.1	330	202	768	2.08e-60	TraesCS4B01G379800	chr4B	660591232	660594196	Inner nuclear membrane Man1
	TRINITY_DN14736_c0_g2	4.07384	8.07e-16	6.36e-14	UP	TRINITY_DN14736_c0_g2	TraesCS7B01G035100.1	1	816	816	0	TraesCS7B01G035100	chr7B	34310629	34312241	Calcium-binding EF-hand
	TRINITY_DN11341_c0_g2	12.7315	8.51e-16	6.69e-14	UP	NA	NA	NA	NA	NA	NA	NA	NA	NA	NA	NA
	TRINITY_DN233839_c0_g1	10.7076	8.55e-16	6.72e-14	UP	NA	NA	NA	NA	NA	NA	NA	NA	NA	NA	NA
	TRINITY_DN4243_c0_g1	8.64488	8.7e-16	6.83e-14	UP	TRINITY_DN4243_c0_g1	TraesCS4A01G162600.1	1	309	318	7.37e-127	TraesCS4A01G162600	chr4A	358840185	358840615	DNA-directed RNA polymerase subunit beta
	TRINITY_DN183484_c0_g1	10.9573	8.89e-16	6.97e-14	UP	TRINITY_DN183484_c0_g1	TraesCS2B01G561700.1	238	299	300	1.44e-21	TraesCS2B01G561700	chr2B	754551187	754551486	Wound-responsive family protein
	TRINITY_DN7187_c0_g2	11.718	8.97e-16	7.03e-14	UP	TRINITY_DN7187_c0_g2	TraesCS2A01G489800.1	1822	1722	2658	7.2e-44	TraesCS2A01G489800	chr2A	723539088	723542524	Leucine-rich repeat receptor-like protein kinase family protein
	TRINITY_DN66717_c0_g1	4.91596	9.11e-16	7.13e-14	UP	TRINITY_DN66717_c0_g1	TraesCS3A01G093100.1	3624	3742	5145	1.62e-42	TraesCS3A01G093100	chr3A	59508325	59521961	Protein RST1
	TRINITY_DN27515_c0_g1	11.8076	9.13e-16	7.14e-14	UP	TRINITY_DN27515_c0_g1	TraesCS4A01G275400.1	40	333	1161	1.76e-150	TraesCS4A01G275400	chr4A	584537677	584539036	Pre-mRNA-splicing factor 18
	TRINITY_DN51230_c1_g1	5.6821	9.3e-16	7.27e-14	UP	TRINITY_DN51230_c1_g1	TraesCS6A01G042600.1	1375	1494	1998	8.4e-49	TraesCS6A01G042600	chr6A	22442891	22446356	Heat shock 70 kDa protein
	TRINITY_DN58637_c0_g1	10.5905	9.38e-16	7.32e-14	UP	NA	NA	NA	NA	NA	NA	NA	NA	NA	NA	NA
	TRINITY_DN10051_c0_g1	3.7625	9.45e-16	7.37e-14	UP	NA	NA	NA	NA	NA	NA	NA	NA	NA	NA	NA
	TRINITY_DN13423_c0_g2	10.2515	9.6e-16	7.47e-14	UP	TRINITY_DN13423_c0_g2	TraesCS5A01G219000.1	519	440	519	2.42e-33	TraesCS5A01G219000	chr5A	436328639	436329157	Early light-induced protein
	TRINITY_DN4503_c0_g1	6.87911	9.74e-16	7.56e-14	UP	TRINITY_DN4503_c0_g1	TraesCS5D01G345700.1	214	250	282	6.84e-06	TraesCS5D01G345700	chr5D	432423271	432423552	50S ribosomal protein L23
	TRINITY_DN14201_c0_g1	4.3222	9.95e-16	7.72e-14	UP	NA	NA	NA	NA	NA	NA	NA	NA	NA	NA	NA
	TRINITY_DN11_c0_g1	7.25579	1.01e-15	7.85e-14	UP	TRINITY_DN11_c0_g1	TraesCS4B01G140200.2	29	270	1293	6.11e-119	TraesCS4B01G140200	chr4B	184603376	184606429	Ribulose bisphosphate carboxylase/oxygenase activase
	TRINITY_DN227_c2_g1	11.4076	1.04e-15	8.08e-14	UP	TRINITY_DN227_c2_g1	TraesCS4B01G059200.1	87	429	429	1.24e-175	TraesCS4B01G059200	chr4B	50403460	50404113	Phosphatidylinositol 4-phosphate 5-kinase 4
	TRINITY_DN63190_c0_g1	10.5248	1.05e-15	8.15e-14	UP	NA	NA	NA	NA	NA	NA	NA	NA	NA	NA	NA
	TRINITY_DN1268_c0_g2	8.93816	1.07e-15	8.29e-14	UP	TRINITY_DN1268_c0_g2	TraesCS4A01G226700.1	393	1	747	1.88e-152	TraesCS4A01G226700	chr4A	534811309	534812238	Heat-shock protein, putative
	TRINITY_DN2225_c0_g1	5.36181	1.09e-15	8.4e-14	UP	TRINITY_DN2225_c0_g1	TraesCS6B01G340400.1	1	240	240	5.79e-121	TraesCS6B01G340400	chr6B	599693475	599693714	CDP-diacylglycerol--glycerol-3-phosphate 3-phosphatidyltransferase, putative
	TRINITY_DN14894_c0_g1	12.9766	1.1e-15	8.47e-14	UP	NA	NA	NA	NA	NA	NA	NA	NA	NA	NA	NA
	TRINITY_DN31046_c0_g1	5.24096	1.11e-15	8.56e-14	UP	NA	NA	NA	NA	NA	NA	NA	NA	NA	NA	NA
	TRINITY_DN81124_c0_g3	11.4355	1.17e-15	8.97e-14	UP	NA	NA	NA	NA	NA	NA	NA	NA	NA	NA	NA
	TRINITY_DN15507_c0_g3	9.87782	1.18e-15	9.06e-14	UP	NA	NA	NA	NA	NA	NA	NA	NA	NA	NA	NA
	TRINITY_DN31139_c0_g1	9.20391	1.19e-15	9.14e-14	UP	TRINITY_DN31139_c0_g1	TraesCS7A01G284500.1	2309	2391	3162	3.12e-34	TraesCS7A01G284500	chr7A	323432678	323479128	Exocyst complex component Sec8-like
	TRINITY_DN20686_c0_g1	4.10716	1.23e-15	9.44e-14	UP	TRINITY_DN20686_c0_g1	TraesCS4A01G110600.1	1377	1449	1731	4.67e-31	TraesCS4A01G110600	chr4A	135342841	135346849	Chaperone protein DnaJ
	TRINITY_DN350_c1_g1	6.60783	1.24e-15	9.48e-14	UP	NA	NA	NA	NA	NA	NA	NA	NA	NA	NA	NA
	TRINITY_DN18128_c0_g1	11.9129	1.29e-15	9.84e-14	UP	TRINITY_DN18128_c0_g1	TraesCS6A01G374800.1	1	53	321	5.17e-20	TraesCS6A01G374800	chr6A	597362227	597362547	L-arabinose isomerase
	TRINITY_DN20950_c1_g1	5.9912	1.3e-15	9.95e-14	UP	TRINITY_DN20950_c1_g1	TraesCS7D01G352400.1	318	1	1158	2.56e-161	TraesCS7D01G352400	chr7D	454071067	454072493	Kelch repeat protein
	TRINITY_DN14882_c0_g2	4.17177	1.36e-15	1.03e-13	UP	TRINITY_DN14882_c0_g2	TraesCS5D01G064100.1	1200	1515	1515	5.26e-159	TraesCS5D01G064100	chr5D	59244240	59247035	Glucan 1,3-beta-glucosidase
	TRINITY_DN63167_c0_g1	10.7055	1.36e-15	1.03e-13	UP	TRINITY_DN63167_c0_g1	TraesCS4A01G095500.1	337	392	1200	1.13e-21	TraesCS4A01G095500	chr4A	103724058	103726912	Hsp70 nucleotide exchange factor fes1
	TRINITY_DN24401_c0_g1	7.38747	1.4e-15	1.06e-13	UP	TRINITY_DN24401_c0_g1	TraesCS1A01G130900.1	434	395	1659	1.85e-11	TraesCS1A01G130900	chr1A	171007151	171034407	muscle M-line assembly protein
	TRINITY_DN50724_c0_g3	3.19442	1.4e-15	1.07e-13	UP	NA	NA	NA	NA	NA	NA	NA	NA	NA	NA	NA
	TRINITY_DN75221_c0_g1	10.3561	1.47e-15	1.12e-13	UP	TRINITY_DN75221_c0_g1	TraesCS3D01G218900.1	1	107	663	7.14e-50	TraesCS3D01G218900	chr3D	298059819	298060729	Repellent protein 1
	TRINITY_DN61614_c0_g3	3.95303	1.5e-15	1.14e-13	UP	TRINITY_DN61614_c0_g3	TraesCS6D01G349500.1	537	433	537	6.51e-49	TraesCS6D01G349500	chr6D	447278039	447278902	Serine-rich protein
	TRINITY_DN34068_c0_g1	9.129	1.52e-15	1.15e-13	UP	NA	NA	NA	NA	NA	NA	NA	NA	NA	NA	NA
	TRINITY_DN125773_c0_g2	9.96874	1.53e-15	1.16e-13	UP	TRINITY_DN125773_c0_g2	TraesCS1D01G179200.1	1539	1473	1539	8.75e-28	TraesCS1D01G179200	chr1D	254388633	254393904	NAD(P)H-quinone oxidoreductase subunit 2, chloroplastic
	TRINITY_DN6091_c0_g1	4.23277	1.55e-15	1.18e-13	UP	NA	NA	NA	NA	NA	NA	NA	NA	NA	NA	NA
	TRINITY_DN504_c0_g1	3.61522	1.56e-15	1.18e-13	UP	TRINITY_DN504_c0_g1	TraesCS1D01G102400.1	1	759	759	0	TraesCS1D01G102400	chr1D	90639927	90641876	Rubber elongation factor protein, putative
	TRINITY_DN49059_c0_g1	9.9883	1.57e-15	1.19e-13	UP	NA	NA	NA	NA	NA	NA	NA	NA	NA	NA	NA
	TRINITY_DN21637_c0_g2	4.29977	1.62e-15	1.22e-13	UP	TRINITY_DN21637_c0_g2	TraesCS1B01G294300.1	1794	1563	1947	1.95e-114	TraesCS1B01G294300	chr1B	512172902	512175830	70 kDa heat shock protein
	TRINITY_DN86296_c2_g1	10.6578	1.63e-15	1.23e-13	UP	TRINITY_DN86296_c2_g1	TraesCS6D01G172600.1	507	238	810	1.69e-140	TraesCS6D01G172600	chr6D	159515506	159517894	Tetraspanin family protein
	TRINITY_DN2466_c2_g2	9.91871	1.72e-15	1.3e-13	UP	NA	NA	NA	NA	NA	NA	NA	NA	NA	NA	NA
	TRINITY_DN8187_c0_g2	4.58648	1.73e-15	1.3e-13	UP	TRINITY_DN8187_c0_g2	TraesCS7B01G162100.1	333	78	675	2.83e-132	TraesCS7B01G162100	chr7B	222313349	222314598	Ethylene-responsive transcription factor
	TRINITY_DN82167_c0_g1	10.2489	1.74e-15	1.3e-13	UP	NA	NA	NA	NA	NA	NA	NA	NA	NA	NA	NA
	TRINITY_DN48183_c1_g1	3.13128	1.78e-15	1.34e-13	UP	TRINITY_DN48183_c1_g1	TraesCS5A01G267500.1	589	948	948	6.31e-161	TraesCS5A01G267500	chr5A	478856993	478857940	Splicing factor U2af small subunit A
	TRINITY_DN45220_c0_g1	5.49622	1.81e-15	1.36e-13	UP	TRINITY_DN45220_c0_g1	TraesCS7A01G394700.1	501	603	603	3.02e-44	TraesCS7A01G394700	chr7A	573069072	573069674	TMV response-related protein
	TRINITY_DN19641_c0_g2	10.6578	1.87e-15	1.4e-13	UP	NA	NA	NA	NA	NA	NA	NA	NA	NA	NA	NA
	TRINITY_DN224448_c0_g1	11.7751	1.96e-15	1.47e-13	UP	NA	NA	NA	NA	NA	NA	NA	NA	NA	NA	NA
	TRINITY_DN35570_c0_g1	5.57411	1.98e-15	1.48e-13	UP	TRINITY_DN35570_c0_g1	TraesCS2B01G172900.1	1	36	660	2.97e-10	TraesCS2B01G172900	chr2B	146954784	146956562	Pyrrolidone-carboxylate peptidase
	TRINITY_DN98818_c0_g1	6.39686	1.99e-15	1.49e-13	UP	TRINITY_DN98818_c0_g1	TraesCS1B01G083500.1	558	833	2052	7.68e-144	TraesCS1B01G083500	chr1B	67533838	67541135	Nuclear pore complex protein Nup98-Nup96
	TRINITY_DN17185_c0_g1	4.52852	2.02e-15	1.51e-13	UP	NA	NA	NA	NA	NA	NA	NA	NA	NA	NA	NA
	TRINITY_DN89410_c3_g1	10.3805	2.07e-15	1.54e-13	UP	NA	NA	NA	NA	NA	NA	NA	NA	NA	NA	NA
	TRINITY_DN7698_c1_g1	3.67994	2.1e-15	1.57e-13	UP	TRINITY_DN7698_c1_g1	TraesCS1A01G346500.1	1	309	804	5.22e-157	TraesCS1A01G346500	chr1A	532967644	532968447	Zinc finger CCCH domain-containing protein
	TRINITY_DN8972_c0_g1	8.28531	2.14e-15	1.59e-13	UP	NA	NA	NA	NA	NA	NA	NA	NA	NA	NA	NA
	TRINITY_DN1808_c1_g1	3.05397	2.14e-15	1.6e-13	UP	TRINITY_DN1808_c1_g1	TraesCSU01G074600.1	1	417	417	0	TraesCSU01G074600	chrUn	67041511	67041927	DUF538 family protein (Protein of unknown function, DUF538)
	TRINITY_DN14159_c0_g1	4.82421	2.18e-15	1.62e-13	UP	TRINITY_DN14159_c0_g1	TraesCS5A01G482100.1	1	1248	1248	0	TraesCS5A01G482100	chr5A	654073774	654075124	Trichome birefringence-like protein
	TRINITY_DN3019_c0_g3	4.43842	2.19e-15	1.62e-13	UP	NA	NA	NA	NA	NA	NA	NA	NA	NA	NA	NA
	TRINITY_DN582_c0_g2	6.09617	2.21e-15	1.64e-13	UP	TRINITY_DN582_c0_g2	TraesCS7D01G293800.1	649	746	921	1.96e-34	TraesCS7D01G293800	chr7D	364630891	364632896	65-kDa microtubule-associated-like protein
	TRINITY_DN36538_c0_g7	5.28255	2.39e-15	1.77e-13	UP	NA	NA	NA	NA	NA	NA	NA	NA	NA	NA	NA
	TRINITY_DN36887_c4_g1	7.56207	2.39e-15	1.77e-13	UP	NA	NA	NA	NA	NA	NA	NA	NA	NA	NA	NA
	TRINITY_DN55539_c0_g1	10.3483	2.42e-15	1.79e-13	UP	NA	NA	NA	NA	NA	NA	NA	NA	NA	NA	NA
	TRINITY_DN41146_c0_g5	11.5866	2.47e-15	1.83e-13	UP	TRINITY_DN41146_c0_g5	TraesCS6A01G374800.1	137	299	321	4.12e-54	TraesCS6A01G374800	chr6A	597362227	597362547	L-arabinose isomerase
	TRINITY_DN16944_c0_g1	4.60017	2.48e-15	1.83e-13	UP	TRINITY_DN16944_c0_g1	TraesCS1A01G085600.1	38	77	1449	3.58e-12	TraesCS1A01G085600	chr1A	71690097	71694523	Aminotransferase
	TRINITY_DN18985_c0_g1	8.50852	2.48e-15	1.83e-13	UP	NA	NA	NA	NA	NA	NA	NA	NA	NA	NA	NA
	TRINITY_DN10803_c0_g1	5.71142	2.57e-15	1.89e-13	UP	TRINITY_DN10803_c0_g1	TraesCS2A01G386800.1	1	134	1734	4.43e-63	TraesCS2A01G386800	chr2A	632604588	632607489	Hsp70-Hsp90 organizing protein 1
	TRINITY_DN209743_c0_g1	12.0349	2.59e-15	1.9e-13	UP	NA	NA	NA	NA	NA	NA	NA	NA	NA	NA	NA
	TRINITY_DN8929_c0_g1	9.83548	2.75e-15	2.02e-13	UP	TRINITY_DN8929_c0_g1	TraesCS7A01G284700.1	904	937	1077	2.78e-09	TraesCS7A01G284700	chr7A	324923899	324926230	Activator of 90 kDa heat shock ATPase-like protein
	TRINITY_DN41912_c0_g2	10.1186	2.75e-15	2.02e-13	UP	NA	NA	NA	NA	NA	NA	NA	NA	NA	NA	NA
	TRINITY_DN8526_c0_g2	3.91718	2.9e-15	2.13e-13	UP	NA	NA	NA	NA	NA	NA	NA	NA	NA	NA	NA
	TRINITY_DN41146_c0_g4	12.5093	2.91e-15	2.13e-13	UP	NA	NA	NA	NA	NA	NA	NA	NA	NA	NA	NA
	TRINITY_DN5396_c1_g1	9.69041	2.93e-15	2.15e-13	UP	NA	NA	NA	NA	NA	NA	NA	NA	NA	NA	NA
	TRINITY_DN12447_c0_g1	5.11622	2.95e-15	2.16e-13	UP	TRINITY_DN12447_c0_g1	TraesCS4D01G234200.1	1	587	1014	0	TraesCS4D01G234200	chr4D	394378196	394379420	Peroxidase
	TRINITY_DN69675_c4_g1	3.56375	3.03e-15	2.21e-13	UP	NA	NA	NA	NA	NA	NA	NA	NA	NA	NA	NA
	TRINITY_DN2115_c1_g1	5.32537	3.14e-15	2.29e-13	UP	TRINITY_DN2115_c1_g1	TraesCS3A01G339600.1	1	52	945	2.05e-19	TraesCS3A01G339600	chr3A	586421966	586423145	NAC domain-containing protein
	TRINITY_DN4026_c3_g1	3.10279	3.23e-15	2.35e-13	UP	TRINITY_DN4026_c3_g1	TraesCS4D01G000500.1	1758	1788	1788	2.1e-07	TraesCS4D01G000500	chr4D	475554	479835	ABC transporter ATP-binding protein ARB1
	TRINITY_DN55151_c0_g1	7.09779	3.27e-15	2.38e-13	UP	TRINITY_DN55151_c0_g1	TraesCS2B01G056900.1	502	463	513	1.65e-10	TraesCS2B01G056900	chr2B	27715435	27718795	Histone acetyltransferase
	TRINITY_DN17123_c0_g1	6.66732	3.29e-15	2.39e-13	UP	TRINITY_DN17123_c0_g1	TraesCS1B01G369400.1	555	624	783	1.49e-28	TraesCS1B01G369400	chr1B	599569931	599572107	Acid phosphatase/vanadium-dependent haloperoxidase-related protein
	TRINITY_DN47233_c0_g1	10.0425	3.3e-15	2.4e-13	UP	NA	NA	NA	NA	NA	NA	NA	NA	NA	NA	NA
	TRINITY_DN19384_c0_g1	11.6172	3.37e-15	2.44e-13	UP	NA	NA	NA	NA	NA	NA	NA	NA	NA	NA	NA
	TRINITY_DN5467_c0_g1	2.72268	3.46e-15	2.51e-13	UP	TRINITY_DN5467_c0_g1	TraesCS1A01G414900.1	1	582	582	0	TraesCS1A01G414900	chr1A	573952315	573953550	Protein FAR1-RELATED SEQUENCE 3
	TRINITY_DN30108_c0_g1	11.1425	3.49e-15	2.52e-13	UP	NA	NA	NA	NA	NA	NA	NA	NA	NA	NA	NA
	TRINITY_DN16811_c0_g1	7.17632	3.55e-15	2.57e-13	UP	TRINITY_DN16811_c0_g1	TraesCS3D01G349000.1	183	960	960	0	TraesCS3D01G349000	chr3D	460441254	460442936	Alpha/beta-Hydrolases superfamily protein
	TRINITY_DN94705_c0_g2	9.80979	3.64e-15	2.63e-13	UP	TRINITY_DN94705_c0_g2	TraesCS2A01G109800.1	321	97	585	6.38e-114	TraesCS2A01G109800	chr2A	61488106	61488797	Ethylene-responsive transcription factor
	TRINITY_DN10853_c0_g1	4.42413	3.77e-15	2.73e-13	UP	TRINITY_DN10853_c0_g1	TraesCS4D01G087800.1	337	2091	2091	0	TraesCS4D01G087800	chr4D	62877250	62880289	PHD finger protein
	TRINITY_DN23780_c0_g1	10.7455	3.9e-15	2.82e-13	UP	NA	NA	NA	NA	NA	NA	NA	NA	NA	NA	NA
	TRINITY_DN72228_c0_g1	4.60374	4.05e-15	2.92e-13	UP	NA	NA	NA	NA	NA	NA	NA	NA	NA	NA	NA
	TRINITY_DN16593_c0_g1	8.1969	4.1e-15	2.95e-13	UP	NA	NA	NA	NA	NA	NA	NA	NA	NA	NA	NA
	TRINITY_DN104566_c0_g2	9.8101	4.15e-15	2.99e-13	UP	NA	NA	NA	NA	NA	NA	NA	NA	NA	NA	NA
	TRINITY_DN12108_c0_g1	5.11186	4.16e-15	2.99e-13	UP	TRINITY_DN12108_c0_g1	TraesCS7A01G073800.1	522	678	915	1.15e-77	TraesCS7A01G073800	chr7A	39227825	39230863	Myeloid leukemia factor 1
	TRINITY_DN9468_c1_g1	9.10926	4.17e-15	3e-13	UP	TRINITY_DN9468_c1_g1	TraesCS2A01G360000.1	448	357	480	2.26e-34	TraesCS2A01G360000	chr2A	603855754	603856938	Cysteine-rich receptor-like protein kinase 41
	TRINITY_DN27120_c1_g1	6.59228	4.18e-15	3e-13	UP	NA	NA	NA	NA	NA	NA	NA	NA	NA	NA	NA
	TRINITY_DN32706_c0_g1	6.71958	4.18e-15	3e-13	UP	NA	NA	NA	NA	NA	NA	NA	NA	NA	NA	NA
	TRINITY_DN4645_c0_g1	3.41953	4.19e-15	3e-13	UP	TRINITY_DN4645_c0_g1	TraesCS3A01G127100.1	286	378	378	6.8e-42	TraesCS3A01G127100	chr3A	102554656	102555033	Neuronal acetylcholine receptor subunit beta-2
	TRINITY_DN30540_c0_g1	5.14686	4.24e-15	3.04e-13	UP	TRINITY_DN30540_c0_g1	TraesCS7A01G225600.1	482	535	969	1.91e-19	TraesCS7A01G225600	chr7A	195189761	195199604	Epoxide hydrolase 2
	TRINITY_DN14911_c2_g1	10.9162	4.25e-15	3.04e-13	UP	NA	NA	NA	NA	NA	NA	NA	NA	NA	NA	NA
	TRINITY_DN24500_c0_g1	3.53367	4.28e-15	3.06e-13	UP	TRINITY_DN24500_c0_g1	TraesCS1A01G364000.1	354	675	675	1.38e-160	TraesCS1A01G364000	chr1A	544176582	544177718	Late embryogenesis abundant protein
	TRINITY_DN107788_c2_g1	10.5889	4.45e-15	3.18e-13	UP	NA	NA	NA	NA	NA	NA	NA	NA	NA	NA	NA
	TRINITY_DN11341_c0_g1	13.3029	4.7e-15	3.35e-13	UP	NA	NA	NA	NA	NA	NA	NA	NA	NA	NA	NA
	TRINITY_DN210736_c0_g1	4.0013	4.79e-15	3.41e-13	UP	TRINITY_DN210736_c0_g1	TraesCS4A01G485000.1	181	276	1833	9.94e-44	TraesCS4A01G485000	chr4A	738960964	738964520	Acid invertase 1
	TRINITY_DN13566_c0_g1	7.55134	4.84e-15	3.45e-13	UP	TRINITY_DN13566_c0_g1	TraesCS4B01G382700.1	256	477	2439	8.74e-73	TraesCS4B01G382700	chr4B	662144758	662148442	BAG family molecular chaperone regulator 6
	TRINITY_DN1196_c9_g1	5.24261	4.86e-15	3.45e-13	UP	TRINITY_DN1196_c9_g1	TraesCS2B01G259200.1	1473	1	1473	0	TraesCS2B01G259200	chr2B	320938819	320940291	MEI2-like 2
	TRINITY_DN368_c0_g1	6.44686	4.95e-15	3.51e-13	UP	TRINITY_DN368_c0_g1	TraesCS4D01G144500.1	962	1215	1266	1.59e-130	TraesCS4D01G144500	chr4D	132941998	132964184	Ankyrin repeat family protein
	TRINITY_DN38236_c0_g1	9.78776	4.96e-15	3.52e-13	UP	NA	NA	NA	NA	NA	NA	NA	NA	NA	NA	NA
	TRINITY_DN33172_c1_g1	9.89474	5.01e-15	3.55e-13	UP	NA	NA	NA	NA	NA	NA	NA	NA	NA	NA	NA
	TRINITY_DN71755_c0_g1	13.6251	5.2e-15	3.69e-13	UP	NA	NA	NA	NA	NA	NA	NA	NA	NA	NA	NA
	TRINITY_DN71345_c1_g1	12.9534	5.25e-15	3.71e-13	UP	NA	NA	NA	NA	NA	NA	NA	NA	NA	NA	NA
	TRINITY_DN18750_c0_g1	3.78991	5.28e-15	3.72e-13	UP	NA	NA	NA	NA	NA	NA	NA	NA	NA	NA	NA
	TRINITY_DN64857_c0_g1	8.10719	5.29e-15	3.72e-13	UP	NA	NA	NA	NA	NA	NA	NA	NA	NA	NA	NA
	TRINITY_DN15902_c1_g1	9.94566	5.29e-15	3.72e-13	UP	NA	NA	NA	NA	NA	NA	NA	NA	NA	NA	NA
	TRINITY_DN29724_c1_g1	6.18662	5.29e-15	3.73e-13	UP	TRINITY_DN29724_c1_g1	TraesCS3D01G158700.1	251	1	537	9.04e-129	TraesCS3D01G158700	chr3D	127334972	127344043	Trafficking protein particle complex subunit-like protein
	TRINITY_DN37966_c0_g1	8.29066	5.47e-15	3.85e-13	UP	NA	NA	NA	NA	NA	NA	NA	NA	NA	NA	NA
	TRINITY_DN1205_c1_g1	3.4406	5.59e-15	3.92e-13	UP	TRINITY_DN1205_c1_g1	TraesCS7B01G351000.1	1	611	885	0	TraesCS7B01G351000	chr7B	608192042	608194211	Phosphosulfolactate synthase-related protein
	TRINITY_DN26847_c0_g1	7.45952	5.84e-15	4.1e-13	UP	TRINITY_DN26847_c0_g1	TraesCS4B01G397600.1	70	99	2034	2.88e-06	TraesCS4B01G397600	chr4B	671739110	671743251	Chaperone DnaK
	TRINITY_DN14911_c0_g1	3.94784	5.89e-15	4.13e-13	UP	TRINITY_DN14911_c0_g1	TraesCS3A01G487300.1	1	186	240	3.22e-93	TraesCS3A01G487300	chr3A	715143742	715144254	nucleoporin
	TRINITY_DN72018_c2_g1	5.92683	5.89e-15	4.13e-13	UP	NA	NA	NA	NA	NA	NA	NA	NA	NA	NA	NA
	TRINITY_DN21313_c1_g2	9.79125	6.02e-15	4.21e-13	UP	TRINITY_DN21313_c1_g2	TraesCS4D01G251000.1	957	1013	1410	3.07e-22	TraesCS4D01G251000	chr4D	419337118	419341202	Glucan endo-1,3-beta-glucosidase 3
	TRINITY_DN1173_c0_g1	2.77442	6.06e-15	4.24e-13	UP	TRINITY_DN1173_c0_g1	TraesCS3B01G440600.2	1	613	1146	0	TraesCS3B01G440600	chr3B	680252643	680254869	F-box family protein
	TRINITY_DN30326_c0_g2	4.3817	6.41e-15	4.47e-13	UP	TRINITY_DN30326_c0_g2	TraesCS2D01G261100.1	1	503	1569	0	TraesCS2D01G261100	chr2D	317940748	317942412	Cytochrome P450
	TRINITY_DN76377_c0_g1	3.62875	6.45e-15	4.49e-13	UP	TRINITY_DN76377_c0_g1	TraesCS2A01G504800.1	1	272	330	6.88e-135	TraesCS2A01G504800	chr2A	733530654	733530983	Homeodomain-like superfamily protein
	TRINITY_DN31529_c3_g1	10.252	6.5e-15	4.53e-13	UP	NA	NA	NA	NA	NA	NA	NA	NA	NA	NA	NA
	TRINITY_DN8393_c0_g1	5.88056	6.59e-15	4.59e-13	UP	TRINITY_DN8393_c0_g1	TraesCS2A01G014000.1	1	184	1155	3.31e-38	TraesCS2A01G014000	chr2A	5663471	5665685	D-amino acid dehydrogenase
	TRINITY_DN8187_c0_g1	3.59346	6.7e-15	4.66e-13	UP	TRINITY_DN8187_c0_g1	TraesCS7A01G264100.1	1	154	684	1.24e-72	TraesCS7A01G264100	chr7A	262473773	262475099	Ethylene-responsive transcription factor
	TRINITY_DN14275_c0_g2	4.39064	6.9e-15	4.8e-13	UP	TRINITY_DN14275_c0_g2	TraesCS5A01G479300.1	1691	1480	1947	2.58e-21	TraesCS5A01G479300	chr5A	652357716	652362145	70 kDa heat shock protein
	TRINITY_DN41738_c0_g1	12.1936	7.02e-15	4.87e-13	UP	NA	NA	NA	NA	NA	NA	NA	NA	NA	NA	NA
	TRINITY_DN461_c0_g1	2.72751	7.17e-15	4.97e-13	UP	TRINITY_DN461_c0_g1	TraesCS1D01G189800.2	1	714	714	0	TraesCS1D01G189800	chr1D	262036257	262037078	Glutathione S-transferase
	TRINITY_DN11509_c0_g1	3.37236	7.3e-15	5.06e-13	UP	TRINITY_DN11509_c0_g1	TraesCS4B01G299400.1	697	942	942	2.15e-123	TraesCS4B01G299400	chr4B	585821448	585823018	Ethylene-responsive transcription factor
	TRINITY_DN13450_c0_g1	7.01935	7.37e-15	5.11e-13	UP	TRINITY_DN13450_c0_g1	TraesCS4B01G140200.1	711	947	1299	3.1e-122	TraesCS4B01G140200	chr4B	184603376	184606429	Ribulose bisphosphate carboxylase/oxygenase activase
	TRINITY_DN12125_c1_g1	7.05246	7.53e-15	5.21e-13	UP	TRINITY_DN12125_c1_g1	TraesCS6B01G222500.1	60	171	456	2.22e-33	TraesCS6B01G222500	chr6B	321297148	321297603	Retrovirus-related Pol polyprotein from transposon TNT 1-94
	TRINITY_DN43198_c0_g2	6.01052	7.62e-15	5.27e-13	UP	NA	NA	NA	NA	NA	NA	NA	NA	NA	NA	NA
	TRINITY_DN69574_c0_g2	6.25512	7.64e-15	5.28e-13	UP	TRINITY_DN69574_c0_g2	TraesCS6D01G104000.1	136	473	870	3.33e-163	TraesCS6D01G104000	chr6D	67569268	67570137	Calcium-dependent lipid-binding domain protein
	TRINITY_DN17302_c0_g1	5.22038	7.67e-15	5.29e-13	UP	NA	NA	NA	NA	NA	NA	NA	NA	NA	NA	NA
	TRINITY_DN36553_c0_g2	5.83639	7.74e-15	5.34e-13	UP	TRINITY_DN36553_c0_g2	TraesCS1A01G393300.1	1	264	264	9.24e-137	TraesCS1A01G393300	chr1A	559881495	559881758	Clavata3/ESR (CLE) gene family member
	TRINITY_DN4733_c0_g1	2.82008	7.84e-15	5.4e-13	UP	TRINITY_DN4733_c0_g1	TraesCS6D01G364400.1	888	1344	1344	0	TraesCS6D01G364400	chr6D	454230135	454233225	COBRA-like protein
	TRINITY_DN19647_c1_g1	7.36554	8.17e-15	5.63e-13	UP	TRINITY_DN19647_c1_g1	TraesCS2D01G033200.1	1976	1761	2133	6.23e-99	TraesCS2D01G033200	chr2D	12882738	12885228	Heat shock protein 90
	TRINITY_DN12389_c2_g1	9.75779	8.41e-15	5.78e-13	UP	NA	NA	NA	NA	NA	NA	NA	NA	NA	NA	NA
	TRINITY_DN174116_c0_g1	7.48752	8.47e-15	5.82e-13	UP	NA	NA	NA	NA	NA	NA	NA	NA	NA	NA	NA
	TRINITY_DN38696_c1_g1	11.1688	8.49e-15	5.83e-13	UP	TRINITY_DN38696_c1_g1	TraesCS3D01G064400.1	10	614	651	8.42e-87	TraesCS3D01G064400	chr3D	28462218	28462868	Transposon Ty3-G Gag-Pol polyprotein
	TRINITY_DN54250_c0_g1	5.57275	8.49e-15	5.83e-13	UP	TRINITY_DN54250_c0_g1	TraesCS3A01G472000.1	482	1256	1257	0	TraesCS3A01G472000	chr3A	703270282	703271538	Basic 7S globulin 2
	TRINITY_DN119001_c0_g4	10.5141	8.92e-15	6.1e-13	UP	NA	NA	NA	NA	NA	NA	NA	NA	NA	NA	NA
	TRINITY_DN20136_c0_g1	6.14049	8.94e-15	6.11e-13	UP	TRINITY_DN20136_c0_g1	TraesCS3A01G260000.2	26	85	768	1.09e-19	TraesCS3A01G260000	chr3A	482403327	482406664	Arginine/serine-rich splicing factor, putative
	TRINITY_DN11110_c1_g1	4.08381	9.12e-15	6.23e-13	UP	TRINITY_DN11110_c1_g1	TraesCS1B01G097400.1	141	199	660	3.79e-23	TraesCS1B01G097400	chr1B	101590765	101591796	Glutathione S-transferase
	TRINITY_DN205231_c0_g1	9.96913	9.84e-15	6.71e-13	UP	NA	NA	NA	NA	NA	NA	NA	NA	NA	NA	NA
	TRINITY_DN19351_c0_g1	6.4045	1.01e-14	6.88e-13	UP	TRINITY_DN19351_c0_g1	TraesCS5A01G475300.1	614	1047	1047	0	TraesCS5A01G475300	chr5A	650554068	650555114	rRNA N-glycosidase
	TRINITY_DN19056_c0_g1	7.27235	1.02e-14	6.98e-13	UP	NA	NA	NA	NA	NA	NA	NA	NA	NA	NA	NA
	TRINITY_DN2966_c0_g1	4.02274	1.03e-14	7.01e-13	UP	TRINITY_DN2966_c0_g1	TraesCS1D01G284000.1	1773	1845	1845	2.19e-30	TraesCS1D01G284000	chr1D	382234639	382237640	70 kDa heat shock protein
	TRINITY_DN7967_c0_g2	4.27369	1.03e-14	7.03e-13	UP	TRINITY_DN7967_c0_g2	TraesCS2A01G360000.1	473	397	480	3.47e-21	TraesCS2A01G360000	chr2A	603855754	603856938	Cysteine-rich receptor-like protein kinase 41
	TRINITY_DN12473_c0_g1	5.28964	1.06e-14	7.17e-13	UP	TRINITY_DN12473_c0_g1	TraesCS1A01G120100.1	1	65	1686	2.09e-26	TraesCS1A01G120100	chr1A	132481070	132485645	70 kDa heat shock protein
	TRINITY_DN84781_c0_g1	10.3454	1.07e-14	7.27e-13	UP	TRINITY_DN84781_c0_g1	TraesCS1A01G076200.1	1	344	975	5.48e-178	TraesCS1A01G076200	chr1A	58946424	58947663	MYB transcription factor
	TRINITY_DN44638_c2_g1	11.3308	1.07e-14	7.28e-13	UP	NA	NA	NA	NA	NA	NA	NA	NA	NA	NA	NA
	TRINITY_DN9117_c1_g2	4.84417	1.09e-14	7.36e-13	UP	NA	NA	NA	NA	NA	NA	NA	NA	NA	NA	NA
	TRINITY_DN26911_c0_g1	8.1255	1.1e-14	7.42e-13	UP	NA	NA	NA	NA	NA	NA	NA	NA	NA	NA	NA
	TRINITY_DN26587_c0_g3	7.24941	1.1e-14	7.42e-13	UP	NA	NA	NA	NA	NA	NA	NA	NA	NA	NA	NA
	TRINITY_DN23932_c2_g3	5.23131	1.1e-14	7.42e-13	UP	TRINITY_DN23932_c2_g3	TraesCS2A01G531500.1	178	238	273	1.28e-15	TraesCS2A01G531500	chr2A	748542328	748542600	Wound-responsive family protein
	TRINITY_DN3008_c0_g1	3.37049	1.13e-14	7.62e-13	UP	TRINITY_DN3008_c0_g1	TraesCS6D01G334000.2	2127	2215	2547	8.34e-38	TraesCS6D01G334000	chr6D	436222035	436225580	Trehalose-6-phosphate synthase
	TRINITY_DN17236_c1_g3	6.08579	1.14e-14	7.65e-13	UP	TRINITY_DN17236_c1_g3	TraesCS6B01G153300.1	3170	2182	3171	0	TraesCS6B01G153300	chr6B	157024233	157027403	Receptor kinase
	TRINITY_DN29727_c0_g1	6.08579	1.14e-14	7.65e-13	UP	TRINITY_DN29727_c0_g1	TraesCS6B01G219600.1	291	1	414	1.9e-110	TraesCS6B01G219600	chr6B	308515555	308515968	Retrovirus-related Pol polyprotein from transposon TNT 1-94
	TRINITY_DN9021_c1_g1	7.54921	1.16e-14	7.84e-13	UP	TRINITY_DN9021_c1_g1	TraesCS4A01G163000.1	1331	1220	3354	2.38e-51	TraesCS4A01G163000	chr4A	362065937	362113687	Ubiquitin carboxyl-terminal hydrolase family protein, expressed
	TRINITY_DN5396_c2_g1	4.37387	1.18e-14	7.91e-13	UP	NA	NA	NA	NA	NA	NA	NA	NA	NA	NA	NA
	TRINITY_DN11827_c0_g1	4.37142	1.19e-14	7.99e-13	UP	NA	NA	NA	NA	NA	NA	NA	NA	NA	NA	NA
	TRINITY_DN16010_c1_g3	9.88507	1.24e-14	8.36e-13	UP	NA	NA	NA	NA	NA	NA	NA	NA	NA	NA	NA
	TRINITY_DN1080_c0_g2	3.28972	1.28e-14	8.57e-13	UP	TRINITY_DN1080_c0_g2	TraesCS3D01G039300.1	1	465	1050	0	TraesCS3D01G039300	chr3D	14947547	14948709	Basic 7S globulin 2
	TRINITY_DN20642_c0_g1	10.6482	1.3e-14	8.68e-13	UP	NA	NA	NA	NA	NA	NA	NA	NA	NA	NA	NA
	TRINITY_DN2114_c0_g1	2.93367	1.38e-14	9.26e-13	UP	TRINITY_DN2114_c0_g1	TraesCS5A01G277500.1	1	756	756	0	TraesCS5A01G277500	chr5A	487365075	487366259	MTD1
	TRINITY_DN21450_c0_g1	5.12746	1.4e-14	9.34e-13	UP	TRINITY_DN21450_c0_g1	TraesCS6D01G164700.1	319	925	930	1.07e-136	TraesCS6D01G164700	chr6D	143671813	143672913	Glutamate--cysteine ligase
	TRINITY_DN2534_c0_g2	8.09933	1.42e-14	9.48e-13	UP	NA	NA	NA	NA	NA	NA	NA	NA	NA	NA	NA
	TRINITY_DN18246_c0_g2	10.2278	1.45e-14	9.64e-13	UP	NA	NA	NA	NA	NA	NA	NA	NA	NA	NA	NA
	TRINITY_DN26381_c0_g1	7.05839	1.45e-14	9.64e-13	UP	TRINITY_DN26381_c0_g1	TraesCS4A01G328600.1	358	432	1257	3.74e-32	TraesCS4A01G328600	chr4A	614106743	614108525	Ankyrin repeat domain protein, putative
	TRINITY_DN10737_c3_g1	5.8137	1.49e-14	9.9e-13	UP	NA	NA	NA	NA	NA	NA	NA	NA	NA	NA	NA
	TRINITY_DN32945_c0_g1	4.03064	1.49e-14	9.91e-13	UP	TRINITY_DN32945_c0_g1	TraesCS3D01G147300.1	106	927	927	1.42e-134	TraesCS3D01G147300	chr3D	111930714	111931847	Retrotransposon protein, putative, Ty1-copia subclass
	TRINITY_DN242_c4_g1	3.99891	1.5e-14	9.96e-13	UP	TRINITY_DN242_c4_g1	TraesCS4A01G202300.1	625	933	1140	8.63e-149	TraesCS4A01G202300	chr4A	492030110	492032620	Alcohol dehydrogenase
	TRINITY_DN11896_c0_g1	4.7633	1.53e-14	1.01e-12	UP	TRINITY_DN11896_c0_g1	TraesCS2B01G272800.1	2532	1	2532	0	TraesCS2B01G272800	chr2B	374205145	374207676	Receptor-like kinase
	TRINITY_DN94522_c2_g1	10.2359	1.54e-14	1.02e-12	UP	NA	NA	NA	NA	NA	NA	NA	NA	NA	NA	NA
	TRINITY_DN88743_c0_g1	7.71758	1.55e-14	1.03e-12	UP	NA	NA	NA	NA	NA	NA	NA	NA	NA	NA	NA
	TRINITY_DN13423_c1_g3	7.4023	1.59e-14	1.05e-12	UP	TRINITY_DN13423_c1_g3	TraesCS5B01G230900.1	277	1	363	6.85e-119	TraesCS5B01G230900	chr5B	407621355	407621717	WD repeat domain phosphoinositide-interacting protein 2
	TRINITY_DN23715_c0_g1	12.9574	1.66e-14	1.1e-12	UP	NA	NA	NA	NA	NA	NA	NA	NA	NA	NA	NA
	TRINITY_DN85526_c0_g1	10.3427	1.69e-14	1.12e-12	UP	NA	NA	NA	NA	NA	NA	NA	NA	NA	NA	NA
	TRINITY_DN255965_c0_g1	12.7612	1.7e-14	1.12e-12	UP	NA	NA	NA	NA	NA	NA	NA	NA	NA	NA	NA
	TRINITY_DN20424_c0_g1	5.0771	1.71e-14	1.13e-12	UP	TRINITY_DN20424_c0_g1	TraesCS3A01G352300.1	425	498	510	2.11e-26	TraesCS3A01G352300	chr3A	600321687	600323239	ATP-dependent Clp protease adapter protein ClpS
	TRINITY_DN25999_c0_g1	10.6503	1.79e-14	1.18e-12	UP	TRINITY_DN25999_c0_g1	TraesCS7A01G477200.1	87	115	480	1.52e-06	TraesCS7A01G477200	chr7A	670956208	670957725	F-box and associated interaction domains-containing protein
	TRINITY_DN26865_c4_g1	9.85984	1.8e-14	1.18e-12	UP	TRINITY_DN26865_c4_g1	TraesCS7A01G360400.1	906	1077	1077	2.05e-54	TraesCS7A01G360400	chr7A	533995324	533996694	Heat shock transcription factor family protein
	TRINITY_DN10878_c0_g3	13.2744	1.81e-14	1.19e-12	UP	NA	NA	NA	NA	NA	NA	NA	NA	NA	NA	NA
	TRINITY_DN25606_c3_g1	10.1101	1.83e-14	1.2e-12	UP	NA	NA	NA	NA	NA	NA	NA	NA	NA	NA	NA
	TRINITY_DN19386_c0_g1	4.4339	1.83e-14	1.2e-12	UP	NA	NA	NA	NA	NA	NA	NA	NA	NA	NA	NA
	TRINITY_DN74149_c0_g1	10.4684	1.85e-14	1.21e-12	UP	NA	NA	NA	NA	NA	NA	NA	NA	NA	NA	NA
	TRINITY_DN23612_c0_g1	7.73226	1.91e-14	1.25e-12	UP	NA	NA	NA	NA	NA	NA	NA	NA	NA	NA	NA
	TRINITY_DN2152_c1_g3	4.44956	1.95e-14	1.28e-12	UP	TRINITY_DN2152_c1_g3	TraesCS5B01G064000.1	1	168	1515	1.5e-80	TraesCS5B01G064000	chr5B	72007486	72010249	Glucan 1,3-beta-glucosidase
	TRINITY_DN13169_c1_g1	9.70368	2e-14	1.31e-12	UP	NA	NA	NA	NA	NA	NA	NA	NA	NA	NA	NA
	TRINITY_DN94678_c0_g2	9.72356	2.02e-14	1.32e-12	UP	NA	NA	NA	NA	NA	NA	NA	NA	NA	NA	NA
	TRINITY_DN28030_c1_g1	11.871	2.04e-14	1.33e-12	UP	NA	NA	NA	NA	NA	NA	NA	NA	NA	NA	NA
	TRINITY_DN19907_c0_g2	7.5249	2.05e-14	1.34e-12	UP	TRINITY_DN19907_c0_g2	TraesCS5B01G152400.1	606	1	606	0	TraesCS5B01G152400	chr5B	281644236	281644841	Calcium-binding protein
	TRINITY_DN2152_c0_g2	3.80116	2.07e-14	1.35e-12	UP	TRINITY_DN2152_c0_g2	TraesCS1B01G121600.2	536	1899	1899	0	TraesCS1B01G121600	chr1B	144926426	144931878	Glucan 1,3-beta-glucosidase
	TRINITY_DN911_c0_g2	3.55016	2.08e-14	1.36e-12	UP	TRINITY_DN911_c0_g2	TraesCS7B01G288100.2	1	289	387	3.76e-149	TraesCS7B01G288100	chr7B	524047175	524048071	senescence-associated family protein (DUF581)
	TRINITY_DN19915_c0_g1	7.18531	2.09e-14	1.36e-12	UP	TRINITY_DN19915_c0_g1	TraesCS4B01G216600.1	3411	3555	3561	1.71e-70	TraesCS4B01G216600	chr4B	456382345	456396153	Replication factor C large subunit
	TRINITY_DN23986_c0_g1	2.67081	2.16e-14	1.4e-12	UP	TRINITY_DN23986_c0_g1	TraesCS1B01G157000.1	713	1	1041	0	TraesCS1B01G157000	chr1B	265646955	265648662	Heavy metal-associated protein
	TRINITY_DN15276_c0_g1	2.79447	2.16e-14	1.4e-12	UP	TRINITY_DN15276_c0_g1	TraesCS5B01G131500.1	93	48	711	1e-12	TraesCS5B01G131500	chr5B	244411496	244414395	Stem-specific protein TSJT1
	TRINITY_DN288_c0_g4	4.63001	2.21e-14	1.43e-12	UP	NA	NA	NA	NA	NA	NA	NA	NA	NA	NA	NA
	TRINITY_DN46387_c0_g1	9.7506	2.21e-14	1.43e-12	UP	TRINITY_DN46387_c0_g1	TraesCS4B01G380700.1	388	878	1281	0	TraesCS4B01G380700	chr4B	660705282	660707282	Trichome birefringence-like protein
	TRINITY_DN59598_c3_g1	6.75967	2.27e-14	1.47e-12	UP	NA	NA	NA	NA	NA	NA	NA	NA	NA	NA	NA
	TRINITY_DN3184_c0_g1	7.29724	2.27e-14	1.47e-12	UP	TRINITY_DN3184_c0_g1	TraesCS2A01G464600.1	83	29	2337	1.13e-18	TraesCS2A01G464600	chr2A	709857790	709862891	Disease resistance protein (NBS-LRR class) family
	TRINITY_DN24882_c1_g1	4.44022	2.29e-14	1.48e-12	UP	NA	NA	NA	NA	NA	NA	NA	NA	NA	NA	NA
	TRINITY_DN71599_c5_g1	10.5937	2.3e-14	1.48e-12	UP	NA	NA	NA	NA	NA	NA	NA	NA	NA	NA	NA
	TRINITY_DN1159_c3_g1	2.63133	2.35e-14	1.52e-12	UP	TRINITY_DN1159_c3_g1	TraesCS6B01G187500.2	98	1206	1206	0	TraesCS6B01G187500	chr6B	214025798	214028666	Phosphoglycerate kinase
	TRINITY_DN50271_c0_g1	9.7112	2.39e-14	1.54e-12	UP	TRINITY_DN50271_c0_g1	TraesCS1B01G389200.1	1	69	1140	6.73e-29	TraesCS1B01G389200	chr1B	622706636	622708876	Alcohol dehydrogenase
	TRINITY_DN94049_c1_g1	10.3417	2.39e-14	1.54e-12	UP	NA	NA	NA	NA	NA	NA	NA	NA	NA	NA	NA
	TRINITY_DN24887_c0_g1	6.14659	2.41e-14	1.55e-12	UP	NA	NA	NA	NA	NA	NA	NA	NA	NA	NA	NA
	TRINITY_DN11806_c0_g2	3.29865	2.48e-14	1.6e-12	UP	TRINITY_DN11806_c0_g2	TraesCS3B01G440600.1	1004	748	1143	2.68e-108	TraesCS3B01G440600	chr3B	680252643	680254869	F-box family protein
	TRINITY_DN140923_c0_g1	9.72752	2.49e-14	1.6e-12	UP	NA	NA	NA	NA	NA	NA	NA	NA	NA	NA	NA
	TRINITY_DN75134_c0_g1	2.92579	2.58e-14	1.65e-12	UP	TRINITY_DN75134_c0_g1	TraesCS6D01G148700.2	925	1152	1287	5.06e-105	TraesCS6D01G148700	chr6D	122253755	122256620	Phosphoglycerate kinase
	TRINITY_DN35171_c0_g1	10.4963	2.59e-14	1.66e-12	UP	TRINITY_DN35171_c0_g1	TraesCS2D01G205300.1	3416	3700	4305	4.35e-47	TraesCS2D01G205300	chr2D	157119913	157124217	Retrovirus-related Pol polyprotein from transposon TNT 1-94
	TRINITY_DN37726_c0_g1	3.6348	2.62e-14	1.68e-12	UP	TRINITY_DN37726_c0_g1	TraesCS7B01G168300.1	775	390	978	0	TraesCS7B01G168300	chr7B	235448977	235450208	Heat stress transcription factor
	TRINITY_DN2013_c0_g1	3.50078	2.66e-14	1.7e-12	UP	TRINITY_DN2013_c0_g1	TraesCS7A01G264400.1	1626	1890	1890	2.98e-137	TraesCS7A01G264400	chr7A	263714673	263727769	Receptor protein kinase, putative
	TRINITY_DN48444_c0_g1	10.225	2.67e-14	1.71e-12	UP	NA	NA	NA	NA	NA	NA	NA	NA	NA	NA	NA
	TRINITY_DN29190_c0_g3	7.48437	2.67e-14	1.71e-12	UP	TRINITY_DN29190_c0_g3	TraesCS6A01G295000.1	384	227	492	4.57e-78	TraesCS6A01G295000	chr6A	528989430	528989999	NADH-ubiquinone reductase complex 1 MLRQ subunit
	TRINITY_DN27587_c0_g1	9.69944	2.78e-14	1.77e-12	UP	NA	NA	NA	NA	NA	NA	NA	NA	NA	NA	NA
	TRINITY_DN31702_c1_g1	10.5591	2.8e-14	1.78e-12	UP	NA	NA	NA	NA	NA	NA	NA	NA	NA	NA	NA
	TRINITY_DN101810_c0_g1	10.3919	2.83e-14	1.8e-12	UP	NA	NA	NA	NA	NA	NA	NA	NA	NA	NA	NA
	TRINITY_DN37647_c0_g2	3.13792	2.84e-14	1.81e-12	UP	TRINITY_DN37647_c0_g2	TraesCS6D01G349000.1	375	483	483	1.3e-50	TraesCS6D01G349000	chr6D	446901928	446903185	Serine-rich protein
	TRINITY_DN54148_c1_g1	9.99198	2.89e-14	1.83e-12	UP	NA	NA	NA	NA	NA	NA	NA	NA	NA	NA	NA
	TRINITY_DN3333_c1_g1	3.81052	2.9e-14	1.84e-12	UP	TRINITY_DN3333_c1_g1	TraesCS2B01G272900.1	101	461	786	0	TraesCS2B01G272900	chr2B	374207787	374209500	Photosystem II 10 kDa polypeptide family protein
	TRINITY_DN37354_c0_g1	12.2263	2.96e-14	1.88e-12	UP	NA	NA	NA	NA	NA	NA	NA	NA	NA	NA	NA
	TRINITY_DN102752_c0_g1	5.3309	3.02e-14	1.91e-12	UP	NA	NA	NA	NA	NA	NA	NA	NA	NA	NA	NA
	TRINITY_DN15524_c1_g1	3.5047	3.03e-14	1.92e-12	UP	NA	NA	NA	NA	NA	NA	NA	NA	NA	NA	NA
	TRINITY_DN15625_c0_g1	8.12687	3.05e-14	1.93e-12	UP	TRINITY_DN15625_c0_g1	TraesCS7A01G011500.1	435	489	621	3.5e-17	TraesCS7A01G011500	chr7A	5014853	5015776	Leucine-rich receptor-like protein kinase family protein
	TRINITY_DN49710_c0_g4	3.40762	3.1e-14	1.96e-12	UP	NA	NA	NA	NA	NA	NA	NA	NA	NA	NA	NA
	TRINITY_DN42942_c1_g1	9.94592	3.11e-14	1.96e-12	UP	TRINITY_DN42942_c1_g1	TraesCS3A01G231000.1	1065	1128	1227	6.36e-26	TraesCS3A01G231000	chr3A	431119443	431125379	Isoprenylcysteine alpha-carbonyl methylesterase ICME
	TRINITY_DN50464_c0_g2	6.20645	3.15e-14	1.99e-12	UP	NA	NA	NA	NA	NA	NA	NA	NA	NA	NA	NA
	TRINITY_DN108121_c0_g1	9.67584	3.29e-14	2.08e-12	UP	TRINITY_DN108121_c0_g1	TraesCS2B01G459100.1	89	1	993	7.96e-40	TraesCS2B01G459100	chr2B	653619152	653620553	Ubiquinol oxidase
	TRINITY_DN48953_c1_g3	9.70719	3.31e-14	2.08e-12	UP	NA	NA	NA	NA	NA	NA	NA	NA	NA	NA	NA
	TRINITY_DN42688_c0_g1	7.9918	3.33e-14	2.1e-12	UP	TRINITY_DN42688_c0_g1	TraesCS3A01G173900.1	315	954	954	0	TraesCS3A01G173900	chr3A	191884189	191885659	Regulator of Ty1 transposition protein 107
	TRINITY_DN12882_c1_g1	2.59208	3.45e-14	2.17e-12	UP	TRINITY_DN12882_c1_g1	TraesCS7B01G354200.1	75	425	843	2.5e-160	TraesCS7B01G354200	chr7B	612255302	612256461	Polyubiquitin
	TRINITY_DN10762_c1_g1	5.49611	3.48e-14	2.19e-12	UP	TRINITY_DN10762_c1_g1	TraesCS5A01G072400.1	546	609	621	1.81e-20	TraesCS5A01G072400	chr5A	83541341	83545828	cytochrome P450, family 81, subfamily D, polypeptide 6
	TRINITY_DN87709_c0_g1	4.99621	3.53e-14	2.21e-12	UP	TRINITY_DN87709_c0_g1	TraesCS1A01G416600.1	29	1	270	6.34e-06	TraesCS1A01G416600	chr1A	574934591	574935614	Transcription elongation factor 1
	TRINITY_DN47915_c0_g1	10.8468	3.61e-14	2.27e-12	UP	TRINITY_DN47915_c0_g1	TraesCS4B01G379900.1	126	1	1281	1.72e-28	TraesCS4B01G379900	chr4B	660594418	660595698	Ribose-phosphate pyrophosphokinase
	TRINITY_DN7074_c0_g1	6.47907	3.64e-14	2.28e-12	UP	TRINITY_DN7074_c0_g1	TraesCS3B01G287400.1	500	364	705	5.7e-64	TraesCS3B01G287400	chr3B	460162442	460163146	Envelope membrane protein
	TRINITY_DN14715_c0_g1	10.7805	3.68e-14	2.3e-12	UP	NA	NA	NA	NA	NA	NA	NA	NA	NA	NA	NA
	TRINITY_DN36887_c3_g1	10.8268	3.71e-14	2.33e-12	UP	TRINITY_DN36887_c3_g1	TraesCS3A01G234700.3	55	6	1728	4.41e-18	TraesCS3A01G234700	chr3A	438356457	438372801	WD repeat protein
	TRINITY_DN36165_c0_g1	9.78825	3.78e-14	2.36e-12	UP	NA	NA	NA	NA	NA	NA	NA	NA	NA	NA	NA
	TRINITY_DN13659_c0_g1	4.67391	3.83e-14	2.4e-12	UP	TRINITY_DN13659_c0_g1	TraesCS4B01G379800.2	969	1104	1149	1.53e-65	TraesCS4B01G379800	chr4B	660591232	660594196	Man1-Src1p-carboxy-terminal domain protein
	TRINITY_DN1117_c0_g1	2.72016	3.95e-14	2.46e-12	UP	TRINITY_DN1117_c0_g1	TraesCS3B01G293100.1	1	658	768	0	TraesCS3B01G293100	chr3B	472112738	472116092	Arginine/serine-rich splicing factor, putative
	TRINITY_DN51189_c0_g1	7.54423	3.99e-14	2.49e-12	UP	NA	NA	NA	NA	NA	NA	NA	NA	NA	NA	NA
	TRINITY_DN10574_c0_g3	3.68691	3.99e-14	2.49e-12	UP	TRINITY_DN10574_c0_g3	TraesCS1A01G384800.1	71	294	294	4.93e-106	TraesCS1A01G384800	chr1A	554463530	554464465	light-independent protochlorophyllide reductase subunit
	TRINITY_DN47680_c0_g1	10.2275	4e-14	2.49e-12	UP	NA	NA	NA	NA	NA	NA	NA	NA	NA	NA	NA
	TRINITY_DN11423_c2_g1	9.83204	4e-14	2.49e-12	UP	TRINITY_DN11423_c2_g1	TraesCS7B01G170700.1	39	1	525	4.43e-12	TraesCS7B01G170700	chr7B	242910585	242911109	Photosystem II reaction center PsbP family protein
	TRINITY_DN16617_c0_g1	3.80056	4.01e-14	2.49e-12	UP	TRINITY_DN16617_c0_g1	TraesCS1D01G181100.1	1742	1680	2202	3.82e-15	TraesCS1D01G181100	chr1D	254463783	254465986	Photosystem I P700 chlorophyll a apoprotein A2
	TRINITY_DN109495_c0_g1	12.4437	4.06e-14	2.52e-12	UP	NA	NA	NA	NA	NA	NA	NA	NA	NA	NA	NA
	TRINITY_DN13421_c0_g1	3.21357	4.15e-14	2.58e-12	UP	TRINITY_DN13421_c0_g1	TraesCS3B01G293000.1	672	1152	1152	0	TraesCS3B01G293000	chr3B	471799767	471801255	AP2/B3 transcription factor family protein
	TRINITY_DN4339_c0_g2	6.67046	4.53e-14	2.81e-12	UP	TRINITY_DN4339_c0_g2	TraesCS7B01G474500.1	676	494	816	9.29e-89	TraesCS7B01G474500	chr7B	730814022	730816063	Ser/Thr-rich protein T10 in DGCR region
	TRINITY_DN47503_c0_g1	5.74563	4.53e-14	2.81e-12	UP	NA	NA	NA	NA	NA	NA	NA	NA	NA	NA	NA
	TRINITY_DN23060_c0_g1	5.93963	4.55e-14	2.81e-12	UP	NA	NA	NA	NA	NA	NA	NA	NA	NA	NA	NA
	TRINITY_DN30107_c0_g2	8.23161	4.56e-14	2.82e-12	UP	TRINITY_DN30107_c0_g2	TraesCS2D01G205300.1	3166	2680	4305	6.89e-113	TraesCS2D01G205300	chr2D	157119913	157124217	Retrovirus-related Pol polyprotein from transposon TNT 1-94
	TRINITY_DN243063_c0_g1	3.69563	4.56e-14	2.82e-12	UP	TRINITY_DN243063_c0_g1	TraesCS1D01G282200.1	1187	1245	1245	3.3e-23	TraesCS1D01G282200	chr1D	379586848	379591111	Tetratricopeptide repeat (TPR)-like superfamily protein
	TRINITY_DN16633_c1_g3	4.63932	4.57e-14	2.82e-12	UP	TRINITY_DN16633_c1_g3	TraesCS4A01G254800.1	227	383	384	7.37e-52	TraesCS4A01G254800	chr4A	567036537	567037063	Carboxypeptidase
	TRINITY_DN20986_c0_g1	6.23213	4.6e-14	2.84e-12	UP	NA	NA	NA	NA	NA	NA	NA	NA	NA	NA	NA
	TRINITY_DN542_c0_g1	2.9904	4.64e-14	2.86e-12	UP	TRINITY_DN542_c0_g1	TraesCS2D01G248200.6	2095	2181	2244	3.03e-16	TraesCS2D01G248200	chr2D	291952565	291956637	Receptor protein kinase-like protein
	TRINITY_DN58649_c0_g1	3.6169	4.66e-14	2.87e-12	UP	NA	NA	NA	NA	NA	NA	NA	NA	NA	NA	NA
	TRINITY_DN28505_c0_g1	10.2984	4.76e-14	2.93e-12	UP	NA	NA	NA	NA	NA	NA	NA	NA	NA	NA	NA
	TRINITY_DN6774_c0_g2	11.0948	4.83e-14	2.97e-12	UP	TRINITY_DN6774_c0_g2	TraesCS7D01G293800.1	648	722	921	1.85e-19	TraesCS7D01G293800	chr7D	364630891	364632896	65-kDa microtubule-associated-like protein
	TRINITY_DN13896_c0_g1	4.58255	4.84e-14	2.98e-12	UP	NA	NA	NA	NA	NA	NA	NA	NA	NA	NA	NA
	TRINITY_DN29721_c0_g2	7.42028	4.93e-14	3.03e-12	UP	TRINITY_DN29721_c0_g2	TraesCS4A01G091500.1	242	307	315	3.63e-22	TraesCS4A01G091500	chr4A	98542709	98543288	Transposon Ty3-G Gag-Pol polyprotein
	TRINITY_DN101427_c0_g1	10.526	5e-14	3.07e-12	UP	TRINITY_DN101427_c0_g1	TraesCS6A01G013700.1	2788	2859	2859	4.26e-28	TraesCS6A01G013700	chr6A	6727602	6735225	Ubiquitin family protein
	TRINITY_DN13566_c1_g1	9.59953	5.05e-14	3.09e-12	UP	TRINITY_DN13566_c1_g1	TraesCS7B01G388700.1	545	751	3873	5.89e-104	TraesCS7B01G388700	chr7B	654949049	654953437	BAG family molecular chaperone regulator 6
	TRINITY_DN32018_c0_g2	12.761	5.05e-14	3.09e-12	UP	NA	NA	NA	NA	NA	NA	NA	NA	NA	NA	NA
	TRINITY_DN66643_c0_g2	9.69134	5.06e-14	3.09e-12	UP	NA	NA	NA	NA	NA	NA	NA	NA	NA	NA	NA
	TRINITY_DN79364_c0_g1	9.69134	5.06e-14	3.09e-12	UP	NA	NA	NA	NA	NA	NA	NA	NA	NA	NA	NA
	TRINITY_DN9182_c0_g1	3.20871	5.07e-14	3.1e-12	UP	TRINITY_DN9182_c0_g1	TraesCS1B01G360300.1	432	798	798	1.4e-175	TraesCS1B01G360300	chr1B	588821872	588822669	Zinc finger CCCH domain-containing protein
	TRINITY_DN59409_c0_g1	4.96462	5.15e-14	3.14e-12	UP	NA	NA	NA	NA	NA	NA	NA	NA	NA	NA	NA
	TRINITY_DN1895_c4_g1	10.0771	5.17e-14	3.15e-12	UP	NA	NA	NA	NA	NA	NA	NA	NA	NA	NA	NA
	TRINITY_DN59581_c0_g1	10.1492	5.3e-14	3.23e-12	UP	NA	NA	NA	NA	NA	NA	NA	NA	NA	NA	NA
	TRINITY_DN50238_c0_g1	11.198	5.32e-14	3.24e-12	UP	NA	NA	NA	NA	NA	NA	NA	NA	NA	NA	NA
	TRINITY_DN199_c0_g2	4.72272	5.45e-14	3.31e-12	UP	TRINITY_DN199_c0_g2	TraesCS4A01G278000.1	1	183	195	9.3e-88	TraesCS4A01G278000	chr4A	585556795	585557127	RING/U-box superfamily protein
	TRINITY_DN19038_c0_g1	4.83606	5.54e-14	3.37e-12	UP	TRINITY_DN19038_c0_g1	TraesCS3D01G046700.1	319	456	456	2.85e-60	TraesCS3D01G046700	chr3D	17591725	17592180	Heat shock protein
	TRINITY_DN22099_c0_g2	6.91503	5.66e-14	3.43e-12	UP	NA	NA	NA	NA	NA	NA	NA	NA	NA	NA	NA
	TRINITY_DN44788_c0_g2	5.02717	5.74e-14	3.48e-12	UP	NA	NA	NA	NA	NA	NA	NA	NA	NA	NA	NA
	TRINITY_DN595_c0_g1	3.09216	5.78e-14	3.5e-12	UP	TRINITY_DN595_c0_g1	TraesCS5A01G328600.1	1	1647	1647	0	TraesCS5A01G328600	chr5A	537632088	537635831	Nodulin-like / Major Facilitator Superfamily protein
	TRINITY_DN48183_c0_g4	2.56181	5.78e-14	3.5e-12	UP	TRINITY_DN48183_c0_g4	TraesCS5D01G275300.1	891	939	939	1.2e-17	TraesCS5D01G275300	chr5D	378120422	378121360	Splicing factor U2af small subunit A
	TRINITY_DN2762_c1_g1	3.9947	5.82e-14	3.52e-12	UP	TRINITY_DN2762_c1_g1	TraesCS1D01G121000.1	2165	2508	2508	1.82e-175	TraesCS1D01G121000	chr1D	120533623	120538939	70 kDa heat shock protein
	TRINITY_DN19236_c6_g1	9.64322	5.91e-14	3.57e-12	UP	NA	NA	NA	NA	NA	NA	NA	NA	NA	NA	NA
	TRINITY_DN28532_c0_g1	4.79223	5.93e-14	3.58e-12	UP	TRINITY_DN28532_c0_g1	TraesCS3A01G232100.1	1396	1485	1485	2.23e-40	TraesCS3A01G232100	chr3A	433551131	433556520	Zinc finger protein ZPR1
	TRINITY_DN18284_c1_g1	2.86172	6.04e-14	3.65e-12	UP	TRINITY_DN18284_c1_g1	TraesCS7A01G490400.1	116	495	495	0	TraesCS7A01G490400	chr7A	679922333	679923457	Serine/arginine repetitive matrix protein 2, putative isoform 1
	TRINITY_DN58197_c1_g1	10.0083	6.12e-14	3.69e-12	UP	TRINITY_DN58197_c1_g1	TraesCS2A01G360000.1	473	355	480	6.81e-10	TraesCS2A01G360000	chr2A	603855754	603856938	Cysteine-rich receptor-like protein kinase 41
	TRINITY_DN643_c1_g1	9.45593	6.14e-14	3.7e-12	UP	NA	NA	NA	NA	NA	NA	NA	NA	NA	NA	NA
	TRINITY_DN18528_c2_g1	9.95275	6.16e-14	3.7e-12	UP	NA	NA	NA	NA	NA	NA	NA	NA	NA	NA	NA
	TRINITY_DN1127_c0_g2	3.75511	6.17e-14	3.71e-12	UP	TRINITY_DN1127_c0_g2	TraesCS3A01G232100.1	1	1275	1485	0	TraesCS3A01G232100	chr3A	433551131	433556520	Zinc finger protein ZPR1
	TRINITY_DN35647_c0_g2	3.65005	6.37e-14	3.83e-12	UP	NA	NA	NA	NA	NA	NA	NA	NA	NA	NA	NA
	TRINITY_DN4066_c3_g1	3.18673	6.37e-14	3.83e-12	UP	TRINITY_DN4066_c3_g1	TraesCS1B01G276700.1	208	267	267	1.08e-23	TraesCS1B01G276700	chr1B	484360535	484360926	Wound-induced protease inhibitor
	TRINITY_DN16091_c0_g2	10.0618	6.52e-14	3.91e-12	UP	NA	NA	NA	NA	NA	NA	NA	NA	NA	NA	NA
	TRINITY_DN9301_c0_g1	3.61315	6.53e-14	3.91e-12	UP	TRINITY_DN9301_c0_g1	TraesCS4A01G097900.1	214	672	1956	0	TraesCS4A01G097900	chr4A	109423673	109426774	70 kDa heat shock protein
	TRINITY_DN161959_c0_g1	10.4382	6.61e-14	3.96e-12	UP	NA	NA	NA	NA	NA	NA	NA	NA	NA	NA	NA
	TRINITY_DN31487_c0_g2	12.4988	6.63e-14	3.97e-12	UP	NA	NA	NA	NA	NA	NA	NA	NA	NA	NA	NA
	TRINITY_DN865_c0_g3	8.24386	6.78e-14	4.06e-12	UP	TRINITY_DN865_c0_g3	TraesCS3B01G369700.1	388	466	1929	8.44e-32	TraesCS3B01G369700	chr3B	581702512	581710090	Type I inositol-1,4,5-trisphosphate 5-phosphatase CVP2
	TRINITY_DN13889_c0_g1	9.1068	6.9e-14	4.12e-12	UP	TRINITY_DN13889_c0_g1	TraesCSU01G131300.1	2468	2589	2916	3.6e-58	TraesCSU01G131300	chrUn	110792543	110798430	ATP-dependent chaperone ClpB
	TRINITY_DN39770_c2_g1	9.87092	6.9e-14	4.12e-12	UP	NA	NA	NA	NA	NA	NA	NA	NA	NA	NA	NA
	TRINITY_DN3561_c1_g1	10.856	6.99e-14	4.17e-12	UP	NA	NA	NA	NA	NA	NA	NA	NA	NA	NA	NA
	TRINITY_DN19499_c0_g2	3.85324	7.13e-14	4.25e-12	UP	NA	NA	NA	NA	NA	NA	NA	NA	NA	NA	NA
	TRINITY_DN25695_c1_g1	11.8678	7.19e-14	4.28e-12	UP	TRINITY_DN25695_c1_g1	TraesCS3B01G356500.1	80	122	1179	1.82e-14	TraesCS3B01G356500	chr3B	566830961	566833369	Disulfide isomerase
	TRINITY_DN111930_c4_g1	9.68731	7.23e-14	4.3e-12	UP	NA	NA	NA	NA	NA	NA	NA	NA	NA	NA	NA
	TRINITY_DN25252_c0_g1	2.61114	7.27e-14	4.32e-12	UP	TRINITY_DN25252_c0_g1	TraesCS4A01G475300.1	1	426	426	0	TraesCS4A01G475300	chr4A	734287687	734289624	NSP-interacting kinase 2
	TRINITY_DN64840_c0_g1	9.62685	7.39e-14	4.39e-12	UP	TRINITY_DN64840_c0_g1	TraesCS4A01G492700.1	542	575	675	1.38e-07	TraesCS4A01G492700	chr4A	741588190	741588864	Glutaredoxin family protein, expressed
	TRINITY_DN5770_c1_g1	6.87392	7.52e-14	4.46e-12	UP	TRINITY_DN5770_c1_g1	TraesCS7B01G083100.1	138	1	642	3.5e-57	TraesCS7B01G083100	chr7B	93864710	93865437	Heat-shock protein, putative
	TRINITY_DN14570_c0_g1	3.63571	7.56e-14	4.48e-12	UP	TRINITY_DN14570_c0_g1	TraesCS4B01G077900.1	101	297	297	4.94e-96	TraesCS4B01G077900	chr4B	74908503	74908911	Gibberellin-regulated protein 1
	TRINITY_DN54548_c0_g1	9.76105	7.85e-14	4.65e-12	UP	NA	NA	NA	NA	NA	NA	NA	NA	NA	NA	NA
	TRINITY_DN8046_c0_g1	2.88301	7.92e-14	4.69e-12	UP	TRINITY_DN8046_c0_g1	TraesCS6D01G105900.1	1	147	147	3.26e-71	TraesCS6D01G105900	chr6D	69197672	69197818	transmembrane protein
	TRINITY_DN4880_c1_g1	3.85861	8.04e-14	4.76e-12	UP	NA	NA	NA	NA	NA	NA	NA	NA	NA	NA	NA
	TRINITY_DN6091_c0_g2	5.01686	8.06e-14	4.77e-12	UP	NA	NA	NA	NA	NA	NA	NA	NA	NA	NA	NA
	TRINITY_DN39999_c0_g1	4.64681	8.16e-14	4.82e-12	UP	TRINITY_DN39999_c0_g1	TraesCS4B01G059400.1	801	683	801	3.17e-48	TraesCS4B01G059400	chr4B	50725324	50728143	transmembrane protein
	TRINITY_DN19602_c0_g1	4.11224	8.46e-14	5e-12	UP	TRINITY_DN19602_c0_g1	TraesCS4B01G102000.1	1	1294	1332	0	TraesCS4B01G102000	chr4B	107753081	107754412	Aspartic proteinase nepenthesin-1
	TRINITY_DN19641_c0_g3	8.92047	8.5e-14	5.01e-12	UP	NA	NA	NA	NA	NA	NA	NA	NA	NA	NA	NA
	TRINITY_DN18705_c0_g4	12.828	8.57e-14	5.05e-12	UP	NA	NA	NA	NA	NA	NA	NA	NA	NA	NA	NA
	TRINITY_DN36598_c0_g2	3.04006	8.57e-14	5.05e-12	UP	TRINITY_DN36598_c0_g2	TraesCS2A01G360000.1	356	474	480	2.84e-37	TraesCS2A01G360000	chr2A	603855754	603856938	Cysteine-rich receptor-like protein kinase 41
	TRINITY_DN79306_c0_g2	9.83192	9.24e-14	5.43e-12	UP	NA	NA	NA	NA	NA	NA	NA	NA	NA	NA	NA
	TRINITY_DN12915_c0_g1	2.68792	9.3e-14	5.46e-12	UP	TRINITY_DN12915_c0_g1	TraesCS4D01G214100.1	358	440	975	1.53e-34	TraesCS4D01G214100	chr4D	367042262	367043915	RNA-binding family protein
	TRINITY_DN18143_c0_g1	3.27321	9.55e-14	5.61e-12	UP	TRINITY_DN18143_c0_g1	TraesCS5A01G251000.1	1951	2037	2346	1.52e-35	TraesCS5A01G251000	chr5A	466613864	466618092	Chaperone protein htpG family protein
	TRINITY_DN56591_c0_g1	8.92911	9.97e-14	5.84e-12	UP	NA	NA	NA	NA	NA	NA	NA	NA	NA	NA	NA
	TRINITY_DN17220_c0_g1	4.23691	1e-13	5.88e-12	UP	NA	NA	NA	NA	NA	NA	NA	NA	NA	NA	NA
	TRINITY_DN15655_c0_g1	8.61884	1.01e-13	5.9e-12	UP	NA	NA	NA	NA	NA	NA	NA	NA	NA	NA	NA
	TRINITY_DN18750_c0_g3	3.71448	1.01e-13	5.94e-12	UP	NA	NA	NA	NA	NA	NA	NA	NA	NA	NA	NA
	TRINITY_DN10416_c0_g1	4.56296	1.03e-13	6.01e-12	UP	TRINITY_DN10416_c0_g1	TraesCS4D01G085800.1	3089	2782	3438	1.5e-160	TraesCS4D01G085800	chr4D	61128653	61149270	ABC transporter, putative
	TRINITY_DN5381_c0_g1	8.40647	1.05e-13	6.12e-12	UP	TRINITY_DN5381_c0_g1	TraesCS2B01G491800.1	112	337	402	1.33e-106	TraesCS2B01G491800	chr2B	690039147	690039548	mechanosensitive channel of small conductance-like 10
	TRINITY_DN48332_c0_g1	4.4686	1.05e-13	6.15e-12	UP	NA	NA	NA	NA	NA	NA	NA	NA	NA	NA	NA
	TRINITY_DN30882_c0_g1	7.15631	1.08e-13	6.3e-12	UP	NA	NA	NA	NA	NA	NA	NA	NA	NA	NA	NA
	TRINITY_DN116864_c0_g1	9.87431	1.1e-13	6.41e-12	UP	NA	NA	NA	NA	NA	NA	NA	NA	NA	NA	NA
	TRINITY_DN48508_c1_g1	6.781	1.11e-13	6.43e-12	UP	NA	NA	NA	NA	NA	NA	NA	NA	NA	NA	NA
	TRINITY_DN18131_c1_g3	5.90687	1.11e-13	6.44e-12	UP	TRINITY_DN18131_c1_g3	TraesCS7B01G113000.1	511	162	1476	1.14e-124	TraesCS7B01G113000	chr7B	130745928	130747403	3-ketoacyl-CoA synthase
	TRINITY_DN32989_c0_g1	5.46226	1.11e-13	6.44e-12	UP	TRINITY_DN32989_c0_g1	TraesCS5D01G027400.1	176	716	1704	0	TraesCS5D01G027400	chr5D	24975718	24979371	Threonine dehydratase
	TRINITY_DN25587_c0_g1	5.32051	1.14e-13	6.58e-12	UP	TRINITY_DN25587_c0_g1	TraesCS5B01G097600.1	245	303	510	2.56e-23	TraesCS5B01G097600	chr5B	128854525	128855822	Universal stress protein
	TRINITY_DN25202_c0_g1	7.35684	1.14e-13	6.58e-12	UP	TRINITY_DN25202_c0_g1	TraesCS6A01G357000.1	69	716	759	5.75e-156	TraesCS6A01G357000	chr6A	587751848	587752932	Gag-pol polyprotein
	TRINITY_DN41141_c0_g3	9.68328	1.15e-13	6.68e-12	UP	TRINITY_DN41141_c0_g3	TraesCS3D01G324900.1	419	864	864	1.33e-143	TraesCS3D01G324900	chr3D	437754799	437755774	Retrotransposon protein, putative, Ty1-copia subclass
	TRINITY_DN11896_c2_g1	10.0496	1.16e-13	6.71e-12	UP	NA	NA	NA	NA	NA	NA	NA	NA	NA	NA	NA
	TRINITY_DN50382_c0_g1	6.23009	1.17e-13	6.73e-12	UP	TRINITY_DN50382_c0_g1	TraesCS4A01G005700.1	1	333	333	1.42e-121	TraesCS4A01G005700	chr4A	3378822	3381403	Trypsin inhibitor
	TRINITY_DN46866_c0_g3	4.53203	1.17e-13	6.75e-12	UP	NA	NA	NA	NA	NA	NA	NA	NA	NA	NA	NA
	TRINITY_DN72943_c0_g2	6.05205	1.27e-13	7.31e-12	UP	TRINITY_DN72943_c0_g2	TraesCS4D01G339100.1	6	355	744	0	TraesCS4D01G339100	chr4D	497126030	497126958	MYB transcription factor
	TRINITY_DN28367_c0_g1	4.91813	1.27e-13	7.34e-12	UP	NA	NA	NA	NA	NA	NA	NA	NA	NA	NA	NA
	TRINITY_DN51878_c0_g1	5.17288	1.32e-13	7.58e-12	UP	NA	NA	NA	NA	NA	NA	NA	NA	NA	NA	NA
	TRINITY_DN28016_c0_g1	5.15598	1.34e-13	7.72e-12	UP	TRINITY_DN28016_c0_g1	TraesCS5A01G545900.1	555	400	555	5.33e-77	TraesCS5A01G545900	chr5A	700444726	700445401	Phosphatidylinositol N-acetylglucosaminyltransferase subunit P
	TRINITY_DN19240_c4_g1	8.6915	1.34e-13	7.72e-12	UP	NA	NA	NA	NA	NA	NA	NA	NA	NA	NA	NA
	TRINITY_DN14746_c0_g1	2.51035	1.38e-13	7.9e-12	UP	TRINITY_DN14746_c0_g1	TraesCS6A01G365900.1	1	245	468	3.82e-93	TraesCS6A01G365900	chr6A	593792311	593792778	Serine-rich protein
	TRINITY_DN26327_c0_g2	10.6237	1.39e-13	7.95e-12	UP	NA	NA	NA	NA	NA	NA	NA	NA	NA	NA	NA
	TRINITY_DN18705_c0_g1	11.8312	1.39e-13	7.95e-12	UP	NA	NA	NA	NA	NA	NA	NA	NA	NA	NA	NA
	TRINITY_DN142293_c1_g1	10.1969	1.39e-13	7.97e-12	UP	TRINITY_DN142293_c1_g1	TraesCS1D01G409900.1	321	360	558	9.53e-11	TraesCS1D01G409900	chr1D	471606088	471606857	Beta-adaptin-like protein
	TRINITY_DN92713_c0_g1	11.5386	1.4e-13	7.99e-12	UP	NA	NA	NA	NA	NA	NA	NA	NA	NA	NA	NA
	TRINITY_DN13022_c1_g3	7.20015	1.4e-13	8.01e-12	UP	TRINITY_DN13022_c1_g3	TraesCS4A01G163000.1	2896	2954	3354	1.91e-22	TraesCS4A01G163000	chr4A	362065937	362113687	Ubiquitin carboxyl-terminal hydrolase family protein, expressed
	TRINITY_DN24903_c0_g2	6.92541	1.4e-13	8.02e-12	UP	NA	NA	NA	NA	NA	NA	NA	NA	NA	NA	NA
	TRINITY_DN5857_c3_g1	9.86369	1.43e-13	8.15e-12	UP	NA	NA	NA	NA	NA	NA	NA	NA	NA	NA	NA
	TRINITY_DN368_c1_g3	6.9342	1.43e-13	8.15e-12	UP	TRINITY_DN368_c1_g3	TraesCS3D01G308500.1	3826	3621	4866	7.86e-104	TraesCS3D01G308500	chr3D	422511735	422548778	Brefeldin A-inhibited guanine nucleotide-exchange protein
	TRINITY_DN20973_c0_g3	9.67642	1.43e-13	8.18e-12	UP	NA	NA	NA	NA	NA	NA	NA	NA	NA	NA	NA
	TRINITY_DN17108_c0_g2	7.03349	1.44e-13	8.22e-12	UP	NA	NA	NA	NA	NA	NA	NA	NA	NA	NA	NA
	TRINITY_DN35765_c0_g1	4.4858	1.45e-13	8.25e-12	UP	TRINITY_DN35765_c0_g1	TraesCS7A01G272600.1	1	318	336	2.43e-160	TraesCS7A01G272600	chr7A	286031793	286032557	Eyes absent homolog 2
	TRINITY_DN2282_c0_g2	2.71252	1.45e-13	8.25e-12	UP	TRINITY_DN2282_c0_g2	TraesCS7B01G296800.1	1	729	729	0	TraesCS7B01G296800	chr7B	533567633	533571023	PLATZ transcription factor family protein
	TRINITY_DN3424_c1_g1	3.23216	1.46e-13	8.3e-12	UP	TRINITY_DN3424_c1_g1	TraesCS2D01G112300.1	1	477	522	0	TraesCS2D01G112300	chr2D	62289147	62289911	Universal stress protein
	TRINITY_DN21219_c1_g1	5.79001	1.47e-13	8.36e-12	UP	TRINITY_DN21219_c1_g1	TraesCS4B01G344000.1	405	741	741	5.62e-169	TraesCS4B01G344000	chr4B	637621778	637622676	MYB transcription factor
	TRINITY_DN701_c4_g1	9.60139	1.5e-13	8.49e-12	UP	NA	NA	NA	NA	NA	NA	NA	NA	NA	NA	NA
	TRINITY_DN17035_c0_g3	10.5152	1.51e-13	8.56e-12	UP	NA	NA	NA	NA	NA	NA	NA	NA	NA	NA	NA
	TRINITY_DN1808_c0_g2	2.7289	1.52e-13	8.63e-12	UP	TRINITY_DN1808_c0_g2	TraesCS5A01G267500.1	1	860	948	0	TraesCS5A01G267500	chr5A	478856993	478857940	Splicing factor U2af small subunit A
	TRINITY_DN6272_c0_g1	3.42892	1.56e-13	8.85e-12	UP	NA	NA	NA	NA	NA	NA	NA	NA	NA	NA	NA
	TRINITY_DN37924_c0_g1	7.31642	1.59e-13	9.03e-12	UP	NA	NA	NA	NA	NA	NA	NA	NA	NA	NA	NA
	TRINITY_DN5004_c0_g1	2.99332	1.63e-13	9.2e-12	UP	TRINITY_DN5004_c0_g1	TraesCS2D01G453100.1	1	333	333	1.19e-169	TraesCS2D01G453100	chr2D	562232068	562232400	senescence-associated family protein (DUF581)
	TRINITY_DN102180_c0_g1	9.64393	1.63e-13	9.2e-12	UP	NA	NA	NA	NA	NA	NA	NA	NA	NA	NA	NA
	TRINITY_DN54498_c0_g1	10.0991	1.64e-13	9.24e-12	UP	TRINITY_DN54498_c0_g1	TraesCS6D01G303600.1	406	465	498	6.6e-24	TraesCS6D01G303600	chr6D	412001132	412001968	Universal stress protein family protein
	TRINITY_DN77687_c0_g2	5.93259	1.71e-13	9.63e-12	UP	NA	NA	NA	NA	NA	NA	NA	NA	NA	NA	NA
	TRINITY_DN71548_c0_g1	9.90562	1.72e-13	9.68e-12	UP	NA	NA	NA	NA	NA	NA	NA	NA	NA	NA	NA
	TRINITY_DN85305_c0_g2	7.94678	1.76e-13	9.92e-12	UP	NA	NA	NA	NA	NA	NA	NA	NA	NA	NA	NA
	TRINITY_DN126_c0_g4	3.78286	1.76e-13	9.92e-12	UP	TRINITY_DN126_c0_g4	TraesCS4B01G211600.1	348	474	474	1.61e-60	TraesCS4B01G211600	chr4B	449928126	449929253	Heat-shock protein
	TRINITY_DN96505_c0_g1	8.27825	1.77e-13	9.98e-12	UP	NA	NA	NA	NA	NA	NA	NA	NA	NA	NA	NA
	TRINITY_DN31098_c0_g1	9.6263	1.8e-13	1.01e-11	UP	TRINITY_DN31098_c0_g1	TraesCS2A01G112500.1	330	388	537	2.4e-23	TraesCS2A01G112500	chr2A	63606250	63607316	Universal stress protein
	TRINITY_DN124648_c0_g1	9.67926	1.82e-13	1.02e-11	UP	NA	NA	NA	NA	NA	NA	NA	NA	NA	NA	NA
	TRINITY_DN78887_c0_g1	9.97289	1.84e-13	1.03e-11	UP	NA	NA	NA	NA	NA	NA	NA	NA	NA	NA	NA
	TRINITY_DN79593_c0_g1	4.40645	1.87e-13	1.05e-11	UP	TRINITY_DN79593_c0_g1	TraesCS7B01G149000.1	1639	1719	1908	9.93e-35	TraesCS7B01G149000	chr7B	196656577	196660131	Ubiquitin-associated domain-containing family protein
	TRINITY_DN30139_c0_g1	4.27467	1.88e-13	1.06e-11	UP	NA	NA	NA	NA	NA	NA	NA	NA	NA	NA	NA
	TRINITY_DN7664_c1_g1	3.6729	1.93e-13	1.08e-11	UP	TRINITY_DN7664_c1_g1	TraesCS3D01G450500.1	626	1110	1110	0	TraesCS3D01G450500	chr3D	558724179	558725374	2-oxoglutarate (2OG) and Fe(II)-dependent oxygenase superfamily protein
	TRINITY_DN2067_c2_g1	9.35717	1.97e-13	1.1e-11	UP	NA	NA	NA	NA	NA	NA	NA	NA	NA	NA	NA
	TRINITY_DN45522_c0_g3	9.65504	2.04e-13	1.14e-11	UP	NA	NA	NA	NA	NA	NA	NA	NA	NA	NA	NA
	TRINITY_DN94964_c0_g1	10.4856	2.04e-13	1.14e-11	UP	NA	NA	NA	NA	NA	NA	NA	NA	NA	NA	NA
	TRINITY_DN209830_c0_g1	9.56748	2.06e-13	1.15e-11	UP	TRINITY_DN209830_c0_g1	TraesCS7A01G264500.1	762	818	1275	4.05e-22	TraesCS7A01G264500	chr7A	263731159	263733027	Stress up-regulated Nod 19 protein
	TRINITY_DN25453_c0_g2	10.5175	2.08e-13	1.16e-11	UP	NA	NA	NA	NA	NA	NA	NA	NA	NA	NA	NA
	TRINITY_DN93892_c0_g1	5.14565	2.09e-13	1.17e-11	UP	TRINITY_DN93892_c0_g1	TraesCS2A01G485700.2	1	75	2250	9.42e-20	TraesCS2A01G485700	chr2A	721104305	721107040	Serine/threonine-protein kinase
	TRINITY_DN70125_c0_g1	4.45406	2.1e-13	1.17e-11	UP	NA	NA	NA	NA	NA	NA	NA	NA	NA	NA	NA
	TRINITY_DN14383_c0_g1	4.64287	2.15e-13	1.2e-11	UP	NA	NA	NA	NA	NA	NA	NA	NA	NA	NA	NA
	TRINITY_DN16112_c0_g1	7.46141	2.15e-13	1.2e-11	UP	NA	NA	NA	NA	NA	NA	NA	NA	NA	NA	NA
	TRINITY_DN100380_c0_g1	10.9548	2.2e-13	1.22e-11	UP	NA	NA	NA	NA	NA	NA	NA	NA	NA	NA	NA
	TRINITY_DN1632_c0_g1	2.99431	2.23e-13	1.24e-11	UP	TRINITY_DN1632_c0_g1	TraesCS7D01G352400.1	13	1158	1158	0	TraesCS7D01G352400	chr7D	454071067	454072493	Kelch repeat protein
	TRINITY_DN18131_c1_g2	7.99708	2.24e-13	1.24e-11	UP	TRINITY_DN18131_c1_g2	TraesCS7A01G205700.1	87	672	1476	0	TraesCS7A01G205700	chr7A	167903286	167904889	3-ketoacyl-CoA synthase
	TRINITY_DN26423_c0_g1	5.72562	2.26e-13	1.25e-11	UP	NA	NA	NA	NA	NA	NA	NA	NA	NA	NA	NA
	TRINITY_DN17149_c1_g1	10.9125	2.28e-13	1.27e-11	UP	NA	NA	NA	NA	NA	NA	NA	NA	NA	NA	NA
	TRINITY_DN28425_c0_g1	4.48263	2.28e-13	1.27e-11	UP	TRINITY_DN28425_c0_g1	TraesCS4B01G397600.1	1253	1493	2034	1.89e-124	TraesCS4B01G397600	chr4B	671739110	671743251	Chaperone DnaK
	TRINITY_DN15938_c0_g3	4.52641	2.3e-13	1.27e-11	UP	NA	NA	NA	NA	NA	NA	NA	NA	NA	NA	NA
	TRINITY_DN32174_c0_g1	4.44437	2.42e-13	1.34e-11	UP	TRINITY_DN32174_c0_g1	TraesCS2A01G111000.1	69	129	312	2.15e-24	TraesCS2A01G111000	chr2A	62369313	62371726	Hypoxia-responsive family protein-like
	TRINITY_DN16015_c0_g2	8.35447	2.45e-13	1.35e-11	UP	TRINITY_DN16015_c0_g2	TraesCS6B01G191300.1	1424	1265	2475	4.86e-75	TraesCS6B01G191300	chr6B	225522241	225552820	Aminotransferase
	TRINITY_DN84567_c1_g2	7.86958	2.48e-13	1.37e-11	UP	NA	NA	NA	NA	NA	NA	NA	NA	NA	NA	NA
	TRINITY_DN27718_c0_g1	3.45948	2.54e-13	1.4e-11	UP	TRINITY_DN27718_c0_g1	TraesCS3D01G384100.2	1	52	1101	3.09e-17	TraesCS3D01G384100	chr3D	499843858	499846146	Fructose-bisphosphate aldolase
	TRINITY_DN26946_c0_g1	5.73062	2.59e-13	1.43e-11	UP	NA	NA	NA	NA	NA	NA	NA	NA	NA	NA	NA
	TRINITY_DN20062_c0_g1	4.9859	2.61e-13	1.44e-11	UP	NA	NA	NA	NA	NA	NA	NA	NA	NA	NA	NA
	TRINITY_DN6009_c0_g1	3.87793	2.63e-13	1.45e-11	UP	TRINITY_DN6009_c0_g1	TraesCS7D01G174300.1	67	2171	2190	0	TraesCS7D01G174300	chr7D	126681685	126683874	Scarecrow transcription factor family protein
	TRINITY_DN10004_c0_g1	2.67698	2.63e-13	1.45e-11	UP	TRINITY_DN10004_c0_g1	TraesCS6B01G418400.1	154	1226	1344	0	TraesCS6B01G418400	chr6B	690558885	690561813	COBRA-like protein
	TRINITY_DN30556_c1_g3	4.03269	2.64e-13	1.45e-11	UP	TRINITY_DN30556_c1_g3	TraesCS3A01G000100.1	1	1421	2259	0	TraesCS3A01G000100	chr3A	14740	17826	Subtilisin-like protease
	TRINITY_DN41746_c0_g2	7.07511	2.66e-13	1.46e-11	UP	NA	NA	NA	NA	NA	NA	NA	NA	NA	NA	NA
	TRINITY_DN93045_c0_g1	3.21195	2.67e-13	1.47e-11	UP	TRINITY_DN93045_c0_g1	TraesCS5B01G428000.1	778	1242	1266	0	TraesCS5B01G428000	chr5B	603954037	603956423	Chaperone protein dnaJ, putative
	TRINITY_DN11133_c0_g1	2.6012	2.69e-13	1.48e-11	UP	TRINITY_DN11133_c0_g1	TraesCS1B01G422400.1	1443	1587	1587	5.95e-71	TraesCS1B01G422400	chr1B	645511135	645514305	Structural constituent of cell wall
	TRINITY_DN201998_c0_g1	7.57906	2.7e-13	1.48e-11	UP	NA	NA	NA	NA	NA	NA	NA	NA	NA	NA	NA
	TRINITY_DN134324_c0_g1	10.0746	2.82e-13	1.55e-11	UP	TRINITY_DN134324_c0_g1	TraesCS2A01G371100.1	40	1	918	1.36e-09	TraesCS2A01G371100	chr2A	613688638	613690027	Short chain dehydrogenase/reductase
	TRINITY_DN2489_c4_g2	9.71591	2.86e-13	1.57e-11	UP	TRINITY_DN2489_c4_g2	TraesCS1D01G142900.1	1	486	582	7.37e-107	TraesCS1D01G142900	chr1D	198172390	198172971	Ethylene-responsive transcription factor, putative
	TRINITY_DN42881_c0_g1	10.6348	2.86e-13	1.57e-11	UP	TRINITY_DN42881_c0_g1	TraesCS6A01G380400.1	278	369	369	2.56e-26	TraesCS6A01G380400	chr6A	600745082	600745537	DEAD/DEAH box RNA helicase family protein
	TRINITY_DN24886_c1_g1	12.6622	2.88e-13	1.58e-11	UP	TRINITY_DN24886_c1_g1	TraesCS1B01G224100.1	225	108	1224	5.14e-26	TraesCS1B01G224100	chr1B	402103979	402113685	Altered inheritance of mitochondria protein 32
	TRINITY_DN26040_c0_g1	4.47012	2.89e-13	1.58e-11	UP	TRINITY_DN26040_c0_g1	TraesCS6D01G364300.1	1292	1170	2343	3.03e-58	TraesCS6D01G364300	chr6D	454221734	454225982	Phosphate transporter PHO1-like protein
	TRINITY_DN134276_c0_g1	11.8558	3e-13	1.64e-11	UP	NA	NA	NA	NA	NA	NA	NA	NA	NA	NA	NA
	TRINITY_DN68097_c0_g1	5.35793	3.04e-13	1.66e-11	UP	TRINITY_DN68097_c0_g1	TraesCS2B01G180200.1	1	53	624	3.31e-19	TraesCS2B01G180200	chr2B	154719452	154723196	RNA binding protein
	TRINITY_DN1923_c0_g1	2.76125	3.06e-13	1.67e-11	UP	TRINITY_DN1923_c0_g1	TraesCS2D01G502700.2	1	489	489	0	TraesCS2D01G502700	chr2D	596252301	596254507	Universal stress family protein
	TRINITY_DN3019_c0_g2	3.91578	3.07e-13	1.67e-11	UP	NA	NA	NA	NA	NA	NA	NA	NA	NA	NA	NA
	TRINITY_DN20812_c0_g1	9.68728	3.07e-13	1.67e-11	UP	TRINITY_DN20812_c0_g1	TraesCS7D01G208500.1	681	543	1485	1.65e-45	TraesCS7D01G208500	chr7D	166512784	166514482	3-ketoacyl-CoA synthase
	TRINITY_DN32470_c1_g1	2.78205	3.19e-13	1.73e-11	UP	NA	NA	NA	NA	NA	NA	NA	NA	NA	NA	NA
	TRINITY_DN2947_c1_g1	6.57072	3.2e-13	1.74e-11	UP	TRINITY_DN2947_c1_g1	TraesCS6D01G187300.1	458	1	972	0	TraesCS6D01G187300	chr6D	251230646	251241109	Basic-leucine zipper (bZIP) transcription factor family protein
	TRINITY_DN96664_c0_g1	10.2748	3.22e-13	1.75e-11	UP	NA	NA	NA	NA	NA	NA	NA	NA	NA	NA	NA
	TRINITY_DN117723_c0_g1	11.5467	3.23e-13	1.75e-11	UP	TRINITY_DN117723_c0_g1	TraesCS3A01G169500.1	1	222	1212	6.97e-70	TraesCS3A01G169500	chr3A	177687055	177693846	Retrotransposon protein, putative, Ty1-copia subclass
	TRINITY_DN200987_c0_g1	9.54116	3.26e-13	1.77e-11	UP	NA	NA	NA	NA	NA	NA	NA	NA	NA	NA	NA
	TRINITY_DN485_c0_g1	5.36317	3.36e-13	1.82e-11	UP	TRINITY_DN485_c0_g1	TraesCS4B01G230600.1	1	541	543	0	TraesCS4B01G230600	chr4B	481640453	481641187	Protein Hikeshi
	TRINITY_DN28579_c0_g1	2.80536	3.41e-13	1.85e-11	UP	TRINITY_DN28579_c0_g1	TraesCS2A01G502200.1	84	182	495	1.77e-45	TraesCS2A01G502200	chr2A	729983738	729985530	Universal stress family protein
	TRINITY_DN14195_c0_g1	7.14841	3.48e-13	1.88e-11	UP	TRINITY_DN14195_c0_g1	TraesCS4B01G118400.1	361	433	588	1.15e-27	TraesCS4B01G118400	chr4B	138616215	138618321	Mediator of DNA damage checkpoint protein 1
	TRINITY_DN36086_c0_g1	9.7873	3.53e-13	1.91e-11	UP	NA	NA	NA	NA	NA	NA	NA	NA	NA	NA	NA
	TRINITY_DN38777_c0_g2	6.4153	3.67e-13	1.99e-11	UP	NA	NA	NA	NA	NA	NA	NA	NA	NA	NA	NA
	TRINITY_DN21485_c0_g1	4.9233	3.72e-13	2.01e-11	UP	NA	NA	NA	NA	NA	NA	NA	NA	NA	NA	NA
	TRINITY_DN18406_c1_g1	10.3903	3.75e-13	2.02e-11	UP	TRINITY_DN18406_c1_g1	TraesCS5D01G303700.1	2469	2404	2469	3.3e-27	TraesCS5D01G303700	chr5D	399159286	399162072	disease resistance protein (TIR-NBS-LRR class)
	TRINITY_DN15633_c2_g2	4.97176	3.85e-13	2.08e-11	UP	TRINITY_DN15633_c2_g2	TraesCS5A01G307300.1	2102	1404	2805	0	TraesCS5A01G307300	chr5A	519945130	519956066	PHD-finger family protein, expressed
	TRINITY_DN12150_c0_g1	2.44169	3.86e-13	2.08e-11	UP	TRINITY_DN12150_c0_g1	TraesCS1A01G273700.1	3470	1846	3996	0	TraesCS1A01G273700	chr1A	467204094	467208089	Retrovirus-related Pol polyprotein from transposon TNT 1-94
	TRINITY_DN12645_c0_g1	2.76556	3.91e-13	2.1e-11	UP	TRINITY_DN12645_c0_g1	TraesCS4D01G212800.1	195	780	780	0	TraesCS4D01G212800	chr4D	365844239	365851519	PHD finger-containing protein
	TRINITY_DN28434_c0_g1	10.4578	3.93e-13	2.11e-11	UP	NA	NA	NA	NA	NA	NA	NA	NA	NA	NA	NA
	TRINITY_DN89480_c0_g2	4.46429	3.94e-13	2.12e-11	UP	TRINITY_DN89480_c0_g2	TraesCS5D01G031600.1	1	316	888	2.03e-152	TraesCS5D01G031600	chr5D	28938583	28940781	2-aminoethanethiol dioxygenase
	TRINITY_DN18294_c0_g6	9.80246	3.96e-13	2.12e-11	UP	TRINITY_DN18294_c0_g6	TraesCS5D01G519800.1	8	874	2589	4.04e-164	TraesCS5D01G519800	chr5D	540340180	540342768	Serine/threonine-protein kinase
	TRINITY_DN20857_c0_g1	3.44673	3.97e-13	2.13e-11	UP	NA	NA	NA	NA	NA	NA	NA	NA	NA	NA	NA
	TRINITY_DN75279_c0_g1	9.87454	3.98e-13	2.14e-11	UP	TRINITY_DN75279_c0_g1	TraesCS5A01G546200.1	403	187	1794	2.69e-110	TraesCS5A01G546200	chr5A	700452607	700455124	Protein NRT1/ PTR FAMILY 5.1
	TRINITY_DN3152_c0_g1	6.57047	4.08e-13	2.18e-11	UP	NA	NA	NA	NA	NA	NA	NA	NA	NA	NA	NA
	TRINITY_DN21810_c0_g1	10.27	4.16e-13	2.23e-11	UP	NA	NA	NA	NA	NA	NA	NA	NA	NA	NA	NA
	TRINITY_DN104566_c0_g1	10.6897	4.18e-13	2.24e-11	UP	NA	NA	NA	NA	NA	NA	NA	NA	NA	NA	NA
	TRINITY_DN1341_c0_g1	4.5858	4.27e-13	2.28e-11	UP	TRINITY_DN1341_c0_g1	TraesCS1B01G335400.1	1	1503	1503	0	TraesCS1B01G335400	chr1B	562468353	562469855	NB-ARC domain-containing disease resistance protein
	TRINITY_DN54868_c0_g1	3.75091	4.36e-13	2.33e-11	UP	TRINITY_DN54868_c0_g1	TraesCS4A01G263200.1	456	655	1149	1.43e-70	TraesCS4A01G263200	chr4A	575735462	575737805	Alpha/beta-Hydrolases superfamily protein
	TRINITY_DN1369_c0_g1	3.22755	4.36e-13	2.33e-11	UP	TRINITY_DN1369_c0_g1	TraesCS1A01G210800.1	140	2220	2220	0	TraesCS1A01G210800	chr1A	373313646	373319695	Oxysterol-binding protein, expressed
	TRINITY_DN68076_c0_g1	5.2928	4.5e-13	2.4e-11	UP	TRINITY_DN68076_c0_g1	TraesCS3B01G059500.1	30	1120	1329	0	TraesCS3B01G059500	chr3B	31066764	31068198	GMP synthase [glutamine-hydrolyzing]
	TRINITY_DN8993_c0_g1	3.17678	4.51e-13	2.4e-11	UP	TRINITY_DN8993_c0_g1	TraesCS5B01G459100.1	174	697	1128	0	TraesCS5B01G459100	chr5B	634993017	634995229	Prolyl 4-hydroxylase alpha subunit, putative
	TRINITY_DN38436_c0_g3	10.5042	4.58e-13	2.44e-11	UP	NA	NA	NA	NA	NA	NA	NA	NA	NA	NA	NA
	TRINITY_DN65934_c0_g1	10.378	4.59e-13	2.44e-11	UP	TRINITY_DN65934_c0_g1	TraesCS3A01G232100.1	983	1043	1485	2e-24	TraesCS3A01G232100	chr3A	433551131	433556520	Zinc finger protein ZPR1
	TRINITY_DN187438_c0_g1	9.51898	4.65e-13	2.47e-11	UP	NA	NA	NA	NA	NA	NA	NA	NA	NA	NA	NA
	TRINITY_DN19649_c1_g2	9.51898	4.65e-13	2.47e-11	UP	TRINITY_DN19649_c1_g2	TraesCS3D01G030600.1	2043	1920	2043	1.23e-41	TraesCS3D01G030600	chr3D	11333513	11355705	Kinase family protein
	TRINITY_DN58791_c0_g3	9.51898	4.65e-13	2.47e-11	UP	TRINITY_DN58791_c0_g3	TraesCS7A01G159600.1	1	90	717	1.69e-40	TraesCS7A01G159600	chr7A	115903779	115904909	Chaperone protein dnaJ
	TRINITY_DN29785_c2_g1	6.5423	4.66e-13	2.48e-11	UP	NA	NA	NA	NA	NA	NA	NA	NA	NA	NA	NA
	TRINITY_DN17535_c0_g1	3.76388	4.67e-13	2.48e-11	UP	TRINITY_DN17535_c0_g1	TraesCS1B01G422400.1	383	634	1587	1.52e-130	TraesCS1B01G422400	chr1B	645511135	645514305	Structural constituent of cell wall
	TRINITY_DN47763_c0_g1	9.84618	4.73e-13	2.51e-11	UP	TRINITY_DN47763_c0_g1	TraesCS2A01G203300.1	1179	1234	2094	7.14e-20	TraesCS2A01G203300	chr2A	179278800	179298601	Phospholipid-transporting ATPase
	TRINITY_DN36792_c0_g1	5.1659	4.76e-13	2.52e-11	UP	TRINITY_DN36792_c0_g1	TraesCS3A01G075900.1	1	279	279	1.07e-130	TraesCS3A01G075900	chr3A	47047981	47048259	Avr9/Cf-9 rapidly elicited protein
	TRINITY_DN1163_c0_g1	3.52095	4.91e-13	2.6e-11	UP	TRINITY_DN1163_c0_g1	TraesCS6A01G222200.1	1	531	531	0	TraesCS6A01G222200	chr6A	415098272	415098802	Senescence regulator
	TRINITY_DN28985_c0_g1	11.8179	4.94e-13	2.61e-11	UP	NA	NA	NA	NA	NA	NA	NA	NA	NA	NA	NA
	TRINITY_DN157703_c0_g1	7.25196	4.96e-13	2.63e-11	UP	NA	NA	NA	NA	NA	NA	NA	NA	NA	NA	NA
	TRINITY_DN46963_c1_g1	11.0332	5.14e-13	2.71e-11	UP	TRINITY_DN46963_c1_g1	TraesCS7B01G093300.3	2578	2423	2784	1.09e-73	TraesCS7B01G093300	chr7B	106945174	106949546	Pentatricopeptide repeat-containing protein
	TRINITY_DN57704_c0_g1	4.11238	5.15e-13	2.72e-11	UP	TRINITY_DN57704_c0_g1	TraesCS2B01G529700.1	951	1178	2292	3.01e-112	TraesCS2B01G529700	chr2B	724650752	724653504	Retrovirus-related Pol polyprotein from transposon TNT 1-94
	TRINITY_DN25453_c0_g1	10.6392	5.32e-13	2.8e-11	UP	NA	NA	NA	NA	NA	NA	NA	NA	NA	NA	NA
	TRINITY_DN30089_c2_g1	12.5462	5.38e-13	2.84e-11	UP	NA	NA	NA	NA	NA	NA	NA	NA	NA	NA	NA
	TRINITY_DN1097_c0_g1	3.86966	5.39e-13	2.84e-11	UP	TRINITY_DN1097_c0_g1	TraesCS3B01G155900.1	1	2277	2277	0	TraesCS3B01G155900	chr3B	148543229	148547081	Subtilisin-like protease
	TRINITY_DN167059_c0_g1	10.3656	5.47e-13	2.88e-11	UP	NA	NA	NA	NA	NA	NA	NA	NA	NA	NA	NA
	TRINITY_DN18694_c0_g1	6.48494	5.52e-13	2.9e-11	UP	TRINITY_DN18694_c0_g1	TraesCS2D01G248200.6	2185	2097	2244	2.65e-22	TraesCS2D01G248200	chr2D	291952565	291956637	Receptor protein kinase-like protein
	TRINITY_DN54612_c0_g3	5.6198	5.55e-13	2.92e-11	UP	NA	NA	NA	NA	NA	NA	NA	NA	NA	NA	NA
	TRINITY_DN6267_c0_g1	4.33556	5.55e-13	2.92e-11	UP	TRINITY_DN6267_c0_g1	TraesCS4A01G202200.1	943	1140	1140	1.26e-83	TraesCS4A01G202200	chr4A	491914988	491917720	Alcohol dehydrogenase
	TRINITY_DN169690_c1_g1	7.89211	5.56e-13	2.92e-11	UP	NA	NA	NA	NA	NA	NA	NA	NA	NA	NA	NA
	TRINITY_DN17510_c0_g1	10.4112	5.6e-13	2.94e-11	UP	NA	NA	NA	NA	NA	NA	NA	NA	NA	NA	NA
	TRINITY_DN58409_c0_g1	5.43379	5.69e-13	2.98e-11	UP	TRINITY_DN58409_c0_g1	TraesCS3B01G233200.1	1632	1699	1881	5.28e-28	TraesCS3B01G233200	chr3B	360109371	360114285	Pentatricopeptide repeat-containing protein
	TRINITY_DN19011_c0_g1	4.8041	5.76e-13	3.02e-11	UP	NA	NA	NA	NA	NA	NA	NA	NA	NA	NA	NA
	TRINITY_DN7739_c0_g1	3.60387	5.78e-13	3.02e-11	UP	TRINITY_DN7739_c0_g1	TraesCS2A01G083600.1	1	833	1479	0	TraesCS2A01G083600	chr2A	38321653	38324840	MLO-like protein
	TRINITY_DN153648_c0_g1	10.9094	5.95e-13	3.11e-11	UP	NA	NA	NA	NA	NA	NA	NA	NA	NA	NA	NA
	TRINITY_DN21725_c0_g1	5.17316	6.03e-13	3.15e-11	UP	TRINITY_DN21725_c0_g1	TraesCS4A01G295500.1	1	367	630	0	TraesCS4A01G295500	chr4A	596166617	596167246	Acetyltransferase, GNAT family protein, expressed
	TRINITY_DN30471_c0_g2	3.54333	6.16e-13	3.22e-11	UP	TRINITY_DN30471_c0_g2	TraesCS1D01G121000.1	2459	2294	2508	3.65e-81	TraesCS1D01G121000	chr1D	120533623	120538939	70 kDa heat shock protein
	TRINITY_DN18201_c0_g1	2.4092	6.27e-13	3.27e-11	UP	TRINITY_DN18201_c0_g1	TraesCS5A01G314700.1	281	1191	1191	0	TraesCS5A01G314700	chr5A	525078041	525079362	Heat shock transcription factor
	TRINITY_DN8041_c0_g1	2.47993	6.28e-13	3.27e-11	UP	TRINITY_DN8041_c0_g1	TraesCS5B01G161600.1	159	314	315	1.11e-63	TraesCS5B01G161600	chr5B	297984928	297986388	P450 reductase 2
	TRINITY_DN7711_c1_g1	3.76858	6.29e-13	3.27e-11	UP	TRINITY_DN7711_c1_g1	TraesCS1A01G194200.1	574	711	711	2.33e-58	TraesCS1A01G194200	chr1A	351475258	351476062	Tetratricopeptide repeat (TPR)-like superfamily protein
	TRINITY_DN80719_c0_g1	10.0026	6.32e-13	3.29e-11	UP	NA	NA	NA	NA	NA	NA	NA	NA	NA	NA	NA
	TRINITY_DN18464_c0_g1	10.6863	6.36e-13	3.31e-11	UP	TRINITY_DN18464_c0_g1	TraesCS3D01G067900.1	2073	1431	2073	0	TraesCS3D01G067900	chr3D	29951188	29953260	Scarecrow transcription factor family protein
	TRINITY_DN2105_c0_g1	3.81586	6.37e-13	3.31e-11	UP	TRINITY_DN2105_c0_g1	TraesCS3A01G408700.1	73	1137	1137	0	TraesCS3A01G408700	chr3A	653416958	653418172	Acyl-[acyl-carrier-protein] desaturase
	TRINITY_DN43653_c1_g1	6.28974	6.43e-13	3.34e-11	UP	TRINITY_DN43653_c1_g1	TraesCS4B01G158000.1	906	709	2592	2.06e-99	TraesCS4B01G158000	chr4B	302849791	302868730	Nuclear cap-binding protein subunit 1
	TRINITY_DN12780_c2_g1	3.71571	6.51e-13	3.38e-11	UP	NA	NA	NA	NA	NA	NA	NA	NA	NA	NA	NA
	TRINITY_DN8526_c2_g1	9.49645	6.52e-13	3.38e-11	UP	NA	NA	NA	NA	NA	NA	NA	NA	NA	NA	NA
	TRINITY_DN5541_c1_g1	3.99538	6.52e-13	3.38e-11	UP	NA	NA	NA	NA	NA	NA	NA	NA	NA	NA	NA
	TRINITY_DN4196_c0_g4	8.61613	6.57e-13	3.4e-11	UP	NA	NA	NA	NA	NA	NA	NA	NA	NA	NA	NA
	TRINITY_DN11810_c0_g1	4.54167	6.58e-13	3.4e-11	UP	TRINITY_DN11810_c0_g1	TraesCS2A01G450300.1	1	1241	1254	0	TraesCS2A01G450300	chr2A	699867533	699869031	U-box domain-containing protein
	TRINITY_DN162643_c0_g1	10.0777	6.66e-13	3.44e-11	UP	NA	NA	NA	NA	NA	NA	NA	NA	NA	NA	NA
	TRINITY_DN109911_c1_g1	9.18975	6.7e-13	3.46e-11	UP	TRINITY_DN109911_c1_g1	TraesCS5A01G149700.1	275	81	426	1.48e-60	TraesCS5A01G149700	chr5A	327575915	327577750	rRNA processing protein-like protein
	TRINITY_DN8453_c0_g1	2.56633	6.71e-13	3.46e-11	UP	TRINITY_DN8453_c0_g1	TraesCS2D01G057000.1	43	933	933	0	TraesCS2D01G057000	chr2D	22767625	22768557	Acidic chitinase
	TRINITY_DN6369_c0_g1	3.7044	6.76e-13	3.49e-11	UP	NA	NA	NA	NA	NA	NA	NA	NA	NA	NA	NA
	TRINITY_DN140329_c0_g1	5.44221	6.78e-13	3.5e-11	UP	TRINITY_DN140329_c0_g1	TraesCS2A01G532100.1	200	258	258	4.72e-23	TraesCS2A01G532100	chr2A	748688522	748688779	Wound-responsive family protein
	TRINITY_DN33869_c0_g4	12.1614	6.8e-13	3.5e-11	UP	NA	NA	NA	NA	NA	NA	NA	NA	NA	NA	NA
	TRINITY_DN117727_c0_g1	7.60138	6.98e-13	3.59e-11	UP	NA	NA	NA	NA	NA	NA	NA	NA	NA	NA	NA
	TRINITY_DN62899_c0_g2	5.7744	6.98e-13	3.59e-11	UP	TRINITY_DN62899_c0_g2	TraesCS1B01G072700.1	1533	1439	1533	5.56e-38	TraesCS1B01G072700	chr1B	57104191	57105723	Pentatricopeptide repeat-containing protein
	TRINITY_DN37227_c0_g1	3.52786	6.99e-13	3.59e-11	UP	TRINITY_DN37227_c0_g1	TraesCS3B01G334600.1	880	725	1131	1.62e-57	TraesCS3B01G334600	chr3B	540727863	540730665	Sporulation protein RMD1
	TRINITY_DN347_c0_g1	3.46664	6.99e-13	3.59e-11	UP	NA	NA	NA	NA	NA	NA	NA	NA	NA	NA	NA
	TRINITY_DN66382_c0_g1	4.63256	7.01e-13	3.6e-11	UP	TRINITY_DN66382_c0_g1	TraesCS1B01G068200.1	4	53	552	8.32e-18	TraesCS1B01G068200	chr1B	53050349	53052389	Prostaglandin E synthase 3
	TRINITY_DN45352_c0_g1	11.8783	7.11e-13	3.65e-11	UP	NA	NA	NA	NA	NA	NA	NA	NA	NA	NA	NA
	TRINITY_DN21975_c0_g1	9.65212	7.15e-13	3.66e-11	UP	NA	NA	NA	NA	NA	NA	NA	NA	NA	NA	NA
	TRINITY_DN85496_c0_g1	10.6984	7.21e-13	3.69e-11	UP	NA	NA	NA	NA	NA	NA	NA	NA	NA	NA	NA
	TRINITY_DN239825_c0_g1	9.86057	7.21e-13	3.69e-11	UP	NA	NA	NA	NA	NA	NA	NA	NA	NA	NA	NA
	TRINITY_DN37696_c1_g1	3.36548	7.26e-13	3.71e-11	UP	NA	NA	NA	NA	NA	NA	NA	NA	NA	NA	NA
	TRINITY_DN565_c1_g1	5.3995	7.37e-13	3.77e-11	UP	TRINITY_DN565_c1_g1	TraesCS6A01G113300.1	99	159	696	1.59e-23	TraesCS6A01G113300	chr6A	83343728	83358462	2,3-bisphosphoglycerate-dependent phosphoglycerate mutase
	TRINITY_DN27576_c0_g1	4.40375	7.4e-13	3.78e-11	UP	TRINITY_DN27576_c0_g1	TraesCS2A01G290000.1	614	477	975	3.56e-34	TraesCS2A01G290000	chr2A	498840377	498841901	SBP (S-ribonuclease-binding protein) family protein, putative
	TRINITY_DN72251_c0_g1	9.85983	7.62e-13	3.88e-11	UP	NA	NA	NA	NA	NA	NA	NA	NA	NA	NA	NA
	TRINITY_DN10451_c0_g1	3.16472	7.62e-13	3.88e-11	UP	TRINITY_DN10451_c0_g1	TraesCS5D01G321000.1	1	303	1194	2.6e-158	TraesCS5D01G321000	chr5D	413057751	413059074	Heat shock transcription factor
	TRINITY_DN29688_c0_g2	7.15839	7.62e-13	3.88e-11	UP	NA	NA	NA	NA	NA	NA	NA	NA	NA	NA	NA
	TRINITY_DN1578_c0_g1	4.19776	7.63e-13	3.88e-11	UP	TRINITY_DN1578_c0_g1	TraesCS4B01G172700.1	1	1683	1704	0	TraesCS4B01G172700	chr4B	377685853	377690805	2,3-bisphosphoglycerate-independent phosphoglycerate mutase, putative
	TRINITY_DN1003_c0_g1	5.79006	7.65e-13	3.89e-11	UP	TRINITY_DN1003_c0_g1	TraesCS4B01G288400.1	1	397	399	6.05e-141	TraesCS4B01G288400	chr4B	573387723	573388121	Ascorbate-specific PTS system EIIA component
	TRINITY_DN133181_c5_g1	9.90166	7.66e-13	3.9e-11	UP	TRINITY_DN133181_c5_g1	TraesCS5D01G393200.1	1134	946	1134	4.23e-82	TraesCS5D01G393200	chr5D	461439693	461440998	Heat shock transcription factor
	TRINITY_DN31034_c0_g1	6.2497	7.69e-13	3.91e-11	UP	NA	NA	NA	NA	NA	NA	NA	NA	NA	NA	NA
	TRINITY_DN28971_c0_g1	10.1584	7.7e-13	3.91e-11	UP	TRINITY_DN28971_c0_g1	TraesCSU01G129900.1	532	382	552	1.28e-67	TraesCSU01G129900	chrUn	110521993	110522874	Phosphatidylinositol N-acetylglucosaminyltransferase subunit P
	TRINITY_DN122754_c0_g2	9.71116	7.71e-13	3.92e-11	UP	NA	NA	NA	NA	NA	NA	NA	NA	NA	NA	NA
	TRINITY_DN10366_c0_g3	3.82596	7.8e-13	3.96e-11	UP	TRINITY_DN10366_c0_g3	TraesCS7A01G270100.1	1	317	1125	1.59e-159	TraesCS7A01G270100	chr7A	276184867	276186319	Heat shock transcription factor
	TRINITY_DN13649_c0_g1	4.00345	7.8e-13	3.96e-11	UP	NA	NA	NA	NA	NA	NA	NA	NA	NA	NA	NA
	TRINITY_DN288_c2_g1	3.68464	7.89e-13	4e-11	UP	NA	NA	NA	NA	NA	NA	NA	NA	NA	NA	NA
	TRINITY_DN1983_c0_g1	3.58487	7.94e-13	4.02e-11	UP	TRINITY_DN1983_c0_g1	TraesCS5B01G428000.1	1	1266	1266	0	TraesCS5B01G428000	chr5B	603954037	603956423	Chaperone protein dnaJ, putative
	TRINITY_DN42873_c0_g1	4.58306	7.97e-13	4.03e-11	UP	NA	NA	NA	NA	NA	NA	NA	NA	NA	NA	NA
	TRINITY_DN18100_c0_g3	6.17308	7.98e-13	4.03e-11	UP	NA	NA	NA	NA	NA	NA	NA	NA	NA	NA	NA
	TRINITY_DN141162_c3_g2	9.73457	8.15e-13	4.12e-11	UP	TRINITY_DN141162_c3_g2	TraesCS2A01G179500.1	384	420	438	5.93e-09	TraesCS2A01G179500	chr2A	138133652	138134089	IgA FC receptor
	TRINITY_DN3476_c0_g1	2.69856	8.15e-13	4.12e-11	UP	TRINITY_DN3476_c0_g1	TraesCS2A01G484400.1	134	56	498	1.03e-22	TraesCS2A01G484400	chr2A	719548223	719561160	cytochrome P450, family 71, subfamily A, polypeptide 14
	TRINITY_DN15856_c0_g1	5.9926	8.42e-13	4.24e-11	UP	TRINITY_DN15856_c0_g1	TraesCS7D01G257300.1	121	193	1680	1.79e-30	TraesCS7D01G257300	chr7D	232811535	232815921	Peptidylprolyl isomerase
	TRINITY_DN4208_c1_g1	3.17368	8.68e-13	4.37e-11	UP	TRINITY_DN4208_c1_g1	TraesCS6D01G349000.1	1	308	483	5.14e-127	TraesCS6D01G349000	chr6D	446901928	446903185	Serine-rich protein
	TRINITY_DN10927_c0_g2	11.2504	8.84e-13	4.45e-11	UP	NA	NA	NA	NA	NA	NA	NA	NA	NA	NA	NA
	TRINITY_DN3019_c0_g4	4.78638	8.85e-13	4.45e-11	UP	NA	NA	NA	NA	NA	NA	NA	NA	NA	NA	NA
	TRINITY_DN15829_c0_g3	3.96561	8.98e-13	4.51e-11	UP	TRINITY_DN15829_c0_g3	TraesCS3B01G125400.1	986	1044	1044	6.18e-23	TraesCS3B01G125400	chr3B	100965674	100968400	Pollen-specific protein SF21
	TRINITY_DN12258_c1_g1	5.04571	9.18e-13	4.6e-11	UP	NA	NA	NA	NA	NA	NA	NA	NA	NA	NA	NA
	TRINITY_DN73833_c0_g1	7.06016	9.19e-13	4.6e-11	UP	TRINITY_DN73833_c0_g1	TraesCS5A01G475300.1	82	587	1047	0	TraesCS5A01G475300	chr5A	650554068	650555114	rRNA N-glycosidase
	TRINITY_DN139419_c0_g2	4.54367	9.26e-13	4.64e-11	UP	TRINITY_DN139419_c0_g2	TraesCS1D01G382900.1	45	337	1095	3.1e-148	TraesCS1D01G382900	chr1D	457849896	457852204	Heat shock transcription factor
	TRINITY_DN13200_c0_g1	11.7903	9.28e-13	4.64e-11	UP	NA	NA	NA	NA	NA	NA	NA	NA	NA	NA	NA
	TRINITY_DN28955_c0_g1	7.70252	9.5e-13	4.75e-11	UP	NA	NA	NA	NA	NA	NA	NA	NA	NA	NA	NA
	TRINITY_DN28833_c0_g2	10.3907	9.57e-13	4.78e-11	UP	NA	NA	NA	NA	NA	NA	NA	NA	NA	NA	NA
	TRINITY_DN19145_c0_g1	3.98792	9.57e-13	4.78e-11	UP	NA	NA	NA	NA	NA	NA	NA	NA	NA	NA	NA
	TRINITY_DN44974_c0_g1	9.85354	9.72e-13	4.85e-11	UP	NA	NA	NA	NA	NA	NA	NA	NA	NA	NA	NA
	TRINITY_DN17820_c2_g1	10.8079	9.73e-13	4.85e-11	UP	NA	NA	NA	NA	NA	NA	NA	NA	NA	NA	NA
	TRINITY_DN23589_c0_g1	4.54948	9.75e-13	4.86e-11	UP	TRINITY_DN23589_c0_g1	TraesCS6A01G102400.2	1	211	2193	2.13e-107	TraesCS6A01G102400	chr6A	71451366	71454100	Plant regulator RWP-RK family protein
	TRINITY_DN9601_c0_g1	3.83794	9.77e-13	4.86e-11	UP	TRINITY_DN9601_c0_g1	TraesCS6B01G292100.1	353	1416	1416	0	TraesCS6B01G292100	chr6B	525555005	525556603	F-box family protein
	TRINITY_DN15163_c0_g1	3.62379	9.8e-13	4.88e-11	UP	TRINITY_DN15163_c0_g1	TraesCS1B01G068200.1	471	503	552	1.4e-08	TraesCS1B01G068200	chr1B	53050349	53052389	Prostaglandin E synthase 3
	TRINITY_DN77532_c0_g1	9.46425	9.94e-13	4.95e-11	UP	TRINITY_DN77532_c0_g1	TraesCS5A01G052700.1	1	132	1338	2.95e-62	TraesCS5A01G052700	chr5A	47650111	47652957	Glucan 1,3-beta-glucosidase
	TRINITY_DN69916_c0_g1	7.12465	9.98e-13	4.96e-11	UP	NA	NA	NA	NA	NA	NA	NA	NA	NA	NA	NA
	TRINITY_DN13693_c0_g1	3.6699	1.02e-12	5.06e-11	UP	NA	NA	NA	NA	NA	NA	NA	NA	NA	NA	NA
	TRINITY_DN135953_c0_g1	9.92327	1.03e-12	5.09e-11	UP	TRINITY_DN135953_c0_g1	TraesCS5A01G314800.1	238	292	1107	4.23e-21	TraesCS5A01G314800	chr5A	525116056	525117885	UDP-glucose 4-epimerase
	TRINITY_DN34457_c0_g1	7.89337	1.03e-12	5.09e-11	UP	TRINITY_DN34457_c0_g1	TraesCS2B01G230600.2	1907	1964	1998	1.97e-22	TraesCS2B01G230600	chr2B	226688033	226702270	Phospholipid-transporting ATPase
	TRINITY_DN11897_c1_g1	7.5769	1.03e-12	5.09e-11	UP	TRINITY_DN11897_c1_g1	TraesCS5B01G350300.1	266	98	348	1.85e-56	TraesCS5B01G350300	chr5B	531217275	531217622	1-(5-phosphoribosyl)-5-[(5-phosphoribosylamino)methylideneamino] imidazole-4-carboxamide isomerase
	TRINITY_DN10274_c0_g2	9.49658	1.09e-12	5.4e-11	UP	NA	NA	NA	NA	NA	NA	NA	NA	NA	NA	NA
	TRINITY_DN107980_c0_g1	8.23721	1.09e-12	5.41e-11	UP	TRINITY_DN107980_c0_g1	TraesCS2B01G258400.1	2475	2537	3630	1.94e-25	TraesCS2B01G258400	chr2B	314770790	314787929	Splicing factor family protein
	TRINITY_DN39638_c0_g2	10.518	1.09e-12	5.41e-11	UP	TRINITY_DN39638_c0_g2	TraesCS4D01G186500.1	251	479	507	3.04e-102	TraesCS4D01G186500	chr4D	324009495	324010184	Universal stress protein family protein, expressed
	TRINITY_DN86584_c0_g1	9.66421	1.1e-12	5.41e-11	UP	TRINITY_DN86584_c0_g1	TraesCS1D01G342000.1	2150	2247	2646	2.78e-43	TraesCS1D01G342000	chr1D	431818473	431824090	WD40 repeat-like protein
	TRINITY_DN119128_c4_g2	9.56684	1.1e-12	5.42e-11	UP	NA	NA	NA	NA	NA	NA	NA	NA	NA	NA	NA
	TRINITY_DN52375_c0_g1	7.33382	1.1e-12	5.42e-11	UP	NA	NA	NA	NA	NA	NA	NA	NA	NA	NA	NA
	TRINITY_DN35406_c0_g1	12.0494	1.11e-12	5.48e-11	UP	NA	NA	NA	NA	NA	NA	NA	NA	NA	NA	NA
	TRINITY_DN139605_c1_g1	8.17863	1.12e-12	5.5e-11	UP	NA	NA	NA	NA	NA	NA	NA	NA	NA	NA	NA
	TRINITY_DN27940_c0_g1	10.3133	1.12e-12	5.5e-11	UP	TRINITY_DN27940_c0_g1	TraesCS6B01G420000.1	599	862	1038	3.43e-137	TraesCS6B01G420000	chr6B	691632058	691633453	Cinnamoyl CoA reductase
	TRINITY_DN32843_c0_g5	5.9505	1.12e-12	5.53e-11	UP	TRINITY_DN32843_c0_g5	TraesCS3B01G384800.1	1127	1026	1377	7.61e-47	TraesCS3B01G384800	chr3B	605014208	605017449	Carboxypeptidase
	TRINITY_DN2348_c0_g1	5.43101	1.14e-12	5.59e-11	UP	TRINITY_DN2348_c0_g1	TraesCS1A01G386800.1	168	415	801	2.09e-113	TraesCS1A01G386800	chr1A	555797050	555799192	Protein MIZU-KUSSEI 1
	TRINITY_DN6499_c0_g1	5.24692	1.14e-12	5.61e-11	UP	TRINITY_DN6499_c0_g1	TraesCS7D01G540700.3	23	60	1452	2.37e-11	TraesCS7D01G540700	chr7D	630527242	630530005	MYB-related protein
	TRINITY_DN551_c0_g1	2.96868	1.17e-12	5.75e-11	UP	NA	NA	NA	NA	NA	NA	NA	NA	NA	NA	NA
	TRINITY_DN75214_c0_g1	6.89755	1.19e-12	5.86e-11	UP	NA	NA	NA	NA	NA	NA	NA	NA	NA	NA	NA
	TRINITY_DN14275_c0_g1	4.12284	1.19e-12	5.86e-11	UP	TRINITY_DN14275_c0_g1	TraesCS5A01G479300.1	31	1691	1947	1.15e-85	TraesCS5A01G479300	chr5A	652357716	652362145	70 kDa heat shock protein
	TRINITY_DN111_c0_g1	3.73048	1.21e-12	5.93e-11	UP	TRINITY_DN111_c0_g1	TraesCS1A01G133100.1	788	2022	2022	0	TraesCS1A01G133100	chr1A	185141618	185146174	Chaperone DnaK
	TRINITY_DN41260_c0_g1	6.33768	1.22e-12	5.98e-11	UP	TRINITY_DN41260_c0_g1	TraesCS5A01G452900.1	376	255	831	5.45e-34	TraesCS5A01G452900	chr5A	634490818	634491648	F-box domain containing protein
	TRINITY_DN17119_c1_g1	4.18118	1.23e-12	6e-11	UP	NA	NA	NA	NA	NA	NA	NA	NA	NA	NA	NA
	TRINITY_DN46650_c0_g1	9.95366	1.24e-12	6.09e-11	UP	NA	NA	NA	NA	NA	NA	NA	NA	NA	NA	NA
	TRINITY_DN10274_c0_g1	7.41799	1.31e-12	6.42e-11	UP	TRINITY_DN10274_c0_g1	TraesCS3B01G326200.1	1931	2007	2022	1.18e-29	TraesCS3B01G326200	chr3B	527147775	527167673	Elongation factor 4
	TRINITY_DN32938_c0_g2	9.90624	1.32e-12	6.46e-11	UP	NA	NA	NA	NA	NA	NA	NA	NA	NA	NA	NA
	TRINITY_DN50005_c0_g1	6.0967	1.33e-12	6.51e-11	UP	NA	NA	NA	NA	NA	NA	NA	NA	NA	NA	NA
	TRINITY_DN19273_c0_g1	3.95067	1.34e-12	6.54e-11	UP	TRINITY_DN19273_c0_g1	TraesCS4D01G103300.1	297	558	1044	4.46e-126	TraesCS4D01G103300	chr4D	81984987	81987448	Alcohol dehydrogenase
	TRINITY_DN61197_c0_g1	9.65924	1.35e-12	6.58e-11	UP	TRINITY_DN61197_c0_g1	TraesCS2B01G515200.1	768	873	873	1.88e-49	TraesCS2B01G515200	chr2B	710045249	710046501	Chitin synthase 3
	TRINITY_DN112962_c0_g1	3.89654	1.35e-12	6.59e-11	UP	TRINITY_DN112962_c0_g1	TraesCS1A01G141900.1	660	711	711	2.59e-19	TraesCS1A01G141900	chr1A	241677733	241679446	RING finger protein
	TRINITY_DN11745_c2_g1	4.96094	1.37e-12	6.67e-11	UP	TRINITY_DN11745_c2_g1	TraesCS1D01G403500.1	737	468	1086	4.45e-127	TraesCS1D01G403500	chr1D	467935742	467938371	Chaperone protein dnaJ
	TRINITY_DN27802_c0_g1	3.52786	1.39e-12	6.75e-11	UP	NA	NA	NA	NA	NA	NA	NA	NA	NA	NA	NA
	TRINITY_DN24296_c0_g1	7.38813	1.4e-12	6.78e-11	UP	TRINITY_DN24296_c0_g1	TraesCS6A01G083200.1	192	252	744	2.33e-24	TraesCS6A01G083200	chr6A	51947908	51953052	Bax inhibitor 1-like protein
	TRINITY_DN42741_c0_g1	8.68568	1.46e-12	7.11e-11	UP	NA	NA	NA	NA	NA	NA	NA	NA	NA	NA	NA
	TRINITY_DN32938_c0_g1	10.3019	1.48e-12	7.17e-11	UP	TRINITY_DN32938_c0_g1	TraesCS1B01G436000.1	138	197	414	4.9e-08	TraesCS1B01G436000	chr1B	659568493	659568906	Avirulence induced gene (AIG1) family protein
	TRINITY_DN7273_c2_g1	4.16704	1.5e-12	7.28e-11	UP	TRINITY_DN7273_c2_g1	TraesCS2B01G561400.1	1	112	267	2.83e-40	TraesCS2B01G561400	chr2B	754004653	754004919	Wound-responsive family protein
	TRINITY_DN19649_c1_g1	9.43624	1.51e-12	7.33e-11	UP	NA	NA	NA	NA	NA	NA	NA	NA	NA	NA	NA
	TRINITY_DN24560_c0_g3	4.48802	1.51e-12	7.34e-11	UP	NA	NA	NA	NA	NA	NA	NA	NA	NA	NA	NA
	TRINITY_DN16466_c1_g3	6.67637	1.52e-12	7.34e-11	UP	NA	NA	NA	NA	NA	NA	NA	NA	NA	NA	NA
	TRINITY_DN242_c1_g2	3.56156	1.53e-12	7.39e-11	UP	TRINITY_DN242_c1_g2	TraesCS4B01G106500.1	1	1140	1140	0	TraesCS4B01G106500	chr4B	115879361	115881669	Alcohol dehydrogenase
	TRINITY_DN47156_c0_g2	10.3098	1.53e-12	7.39e-11	UP	TRINITY_DN47156_c0_g2	TraesCS3B01G220700.1	718	759	759	1.4e-09	TraesCS3B01G220700	chr3B	270890846	270891990	Eukaryotic translation initiation factor 6
	TRINITY_DN22592_c0_g3	6.58516	1.53e-12	7.39e-11	UP	TRINITY_DN22592_c0_g3	TraesCS6B01G221200.1	387	315	855	1.16e-19	TraesCS6B01G221200	chr6B	317104508	317105362	Transposon Ty3-I Gag-Pol polyprotein
	TRINITY_DN38586_c0_g1	10.0285	1.54e-12	7.41e-11	UP	TRINITY_DN38586_c0_g1	TraesCS1D01G254800.1	369	441	1407	5.72e-31	TraesCS1D01G254800	chr1D	347216144	347219364	Lipase
	TRINITY_DN82449_c0_g1	9.50179	1.56e-12	7.54e-11	UP	NA	NA	NA	NA	NA	NA	NA	NA	NA	NA	NA
	TRINITY_DN18117_c0_g1	5.69144	1.62e-12	7.79e-11	UP	NA	NA	NA	NA	NA	NA	NA	NA	NA	NA	NA
	TRINITY_DN24886_c2_g2	11.3467	1.62e-12	7.79e-11	UP	TRINITY_DN24886_c2_g2	TraesCS4A01G163000.1	1221	1108	3354	9.26e-47	TraesCS4A01G163000	chr4A	362065937	362113687	Ubiquitin carboxyl-terminal hydrolase family protein, expressed
	TRINITY_DN10827_c0_g2	3.64242	1.64e-12	7.88e-11	UP	TRINITY_DN10827_c0_g2	TraesCS4B01G206700.1	812	1339	1956	0	TraesCS4B01G206700	chr4B	439320303	439322375	70 kDa heat shock protein
	TRINITY_DN5981_c0_g2	2.77086	1.65e-12	7.95e-11	UP	NA	NA	NA	NA	NA	NA	NA	NA	NA	NA	NA
	TRINITY_DN16838_c0_g1	4.20547	1.66e-12	7.95e-11	UP	TRINITY_DN16838_c0_g1	TraesCS1A01G133100.2	1	491	2055	0	TraesCS1A01G133100	chr1A	185141618	185146174	Chaperone DnaK
	TRINITY_DN51242_c0_g1	5.60499	1.66e-12	7.98e-11	UP	TRINITY_DN51242_c0_g1	TraesCS3D01G218900.1	539	663	663	6.59e-60	TraesCS3D01G218900	chr3D	298059819	298060729	Repellent protein 1
	TRINITY_DN2152_c1_g2	3.37593	1.71e-12	8.21e-11	UP	TRINITY_DN2152_c1_g2	TraesCS5D01G064100.1	147	1143	1515	0	TraesCS5D01G064100	chr5D	59244240	59247035	Glucan 1,3-beta-glucosidase
	TRINITY_DN71873_c0_g2	6.18037	1.73e-12	8.29e-11	UP	TRINITY_DN71873_c0_g2	TraesCS6D01G182900.2	1677	1321	12261	0	TraesCS6D01G182900	chr6D	218383154	218453331	calcium-dependent lipid-binding family protein
	TRINITY_DN14270_c0_g1	4.84609	1.73e-12	8.31e-11	UP	NA	NA	NA	NA	NA	NA	NA	NA	NA	NA	NA
	TRINITY_DN9979_c3_g1	9.68986	1.74e-12	8.35e-11	UP	TRINITY_DN9979_c3_g1	TraesCS3A01G494200.1	681	641	1473	2.65e-12	TraesCS3A01G494200	chr3A	720392408	720394183	transmembrane protein, putative (DUF247)
	TRINITY_DN15197_c0_g1	4.39478	1.76e-12	8.42e-11	UP	TRINITY_DN15197_c0_g1	TraesCS6B01G116700.1	117	360	984	1.93e-119	TraesCS6B01G116700	chr6B	103699088	103703161	L-lactate dehydrogenase
	TRINITY_DN70483_c0_g1	9.66009	1.79e-12	8.54e-11	UP	TRINITY_DN70483_c0_g1	TraesCS6A01G307100.1	522	745	1482	1.06e-111	TraesCS6A01G307100	chr6A	541227669	541229239	Hexosyltransferase
	TRINITY_DN15501_c0_g1	3.96222	1.79e-12	8.56e-11	UP	TRINITY_DN15501_c0_g1	TraesCS7B01G296800.1	374	441	729	3.23e-27	TraesCS7B01G296800	chr7B	533567633	533571023	PLATZ transcription factor family protein
	TRINITY_DN58055_c0_g1	6.90963	1.81e-12	8.66e-11	UP	TRINITY_DN58055_c0_g1	TraesCSU01G130000.1	1	66	762	4.77e-27	TraesCSU01G130000	chrUn	110522968	110526146	Inner nuclear membrane Man1
	TRINITY_DN95042_c1_g2	9.63877	1.83e-12	8.75e-11	UP	TRINITY_DN95042_c1_g2	TraesCS7D01G136000.1	503	425	528	6.57e-25	TraesCS7D01G136000	chr7D	87362935	87363464	Polynucleotidyl transferase, ribonuclease H-like superfamily protein
	TRINITY_DN61002_c2_g1	10.2211	1.86e-12	8.87e-11	UP	NA	NA	NA	NA	NA	NA	NA	NA	NA	NA	NA
	TRINITY_DN91205_c0_g1	6.53989	1.87e-12	8.91e-11	UP	TRINITY_DN91205_c0_g1	TraesCS7B01G347100.1	11	259	489	1.53e-120	TraesCS7B01G347100	chr7B	603657252	603657740	Heat-shock protein, putative
	TRINITY_DN69574_c0_g3	3.90584	1.87e-12	8.91e-11	UP	TRINITY_DN69574_c0_g3	TraesCS6B01G143000.1	244	1	888	5.46e-111	TraesCS6B01G143000	chr6B	142612422	142613492	Calcium-dependent lipid-binding domain protein
	TRINITY_DN59074_c0_g1	6.29521	1.88e-12	8.91e-11	UP	NA	NA	NA	NA	NA	NA	NA	NA	NA	NA	NA
	TRINITY_DN57146_c0_g1	4.20698	1.88e-12	8.91e-11	UP	TRINITY_DN57146_c0_g1	TraesCS3D01G118300.1	1137	894	1491	4.12e-126	TraesCS3D01G118300	chr3D	72252014	72253630	Transcription factor, putative
	TRINITY_DN158033_c0_g1	9.42172	1.91e-12	9.07e-11	UP	NA	NA	NA	NA	NA	NA	NA	NA	NA	NA	NA
	TRINITY_DN22058_c0_g1	3.27988	1.91e-12	9.08e-11	UP	TRINITY_DN22058_c0_g1	TraesCS7D01G168600.1	338	546	546	4.85e-103	TraesCS7D01G168600	chr7D	119105284	119105987	RNA ligase/cyclic nucleotide phosphodiesterase family protein
	TRINITY_DN144978_c2_g1	10.3781	1.93e-12	9.13e-11	UP	TRINITY_DN144978_c2_g1	TraesCS6D01G393800.1	1145	829	1164	6.23e-121	TraesCS6D01G393800	chr6D	467546188	467547351	BAG family molecular chaperone regulator 5
	TRINITY_DN86030_c0_g2	9.46377	1.94e-12	9.18e-11	UP	TRINITY_DN86030_c0_g2	TraesCS1A01G384800.1	98	241	294	9.04e-34	TraesCS1A01G384800	chr1A	554463530	554464465	light-independent protochlorophyllide reductase subunit
	TRINITY_DN73526_c0_g1	8.74596	1.95e-12	9.22e-11	UP	TRINITY_DN73526_c0_g1	TraesCS6B01G231900.1	1363	1404	1989	5.32e-13	TraesCS6B01G231900	chr6B	387077103	387161980	SNARE-interacting protein KEULE
	TRINITY_DN20770_c1_g3	10.0833	1.96e-12	9.26e-11	UP	TRINITY_DN20770_c1_g3	TraesCS2B01G040800.1	2064	1867	2064	2.39e-66	TraesCS2B01G040800	chr2B	18682032	18704233	Copalyl diphosphate synthase
	TRINITY_DN112508_c3_g1	6.39431	1.98e-12	9.39e-11	UP	NA	NA	NA	NA	NA	NA	NA	NA	NA	NA	NA
	TRINITY_DN34804_c1_g1	10.0661	1.99e-12	9.43e-11	UP	NA	NA	NA	NA	NA	NA	NA	NA	NA	NA	NA
	TRINITY_DN11070_c1_g1	2.89131	2e-12	9.45e-11	UP	TRINITY_DN11070_c1_g1	TraesCS5B01G324300.1	1	99	468	3.7e-43	TraesCS5B01G324300	chr5B	508608609	508609076	mRNA cleavage and polyadenylation factor CLP1
	TRINITY_DN149622_c0_g1	9.8609	2.02e-12	9.54e-11	UP	NA	NA	NA	NA	NA	NA	NA	NA	NA	NA	NA
	TRINITY_DN16416_c0_g1	3.56373	2.02e-12	9.55e-11	UP	TRINITY_DN16416_c0_g1	TraesCS6A01G292300.1	1	421	708	0	TraesCS6A01G292300	chr6A	524304843	524312602	AGAMOUS-like MADS-box transcription factor
	TRINITY_DN65060_c2_g1	9.44626	2.03e-12	9.6e-11	UP	NA	NA	NA	NA	NA	NA	NA	NA	NA	NA	NA
	TRINITY_DN71123_c0_g1	11.0338	2.07e-12	9.75e-11	UP	NA	NA	NA	NA	NA	NA	NA	NA	NA	NA	NA
	TRINITY_DN67900_c0_g1	11.334	2.11e-12	9.94e-11	UP	NA	NA	NA	NA	NA	NA	NA	NA	NA	NA	NA
	TRINITY_DN4066_c0_g1	8.38909	2.12e-12	9.97e-11	UP	TRINITY_DN4066_c0_g1	TraesCS5D01G479300.1	1	291	291	3.97e-148	TraesCS5D01G479300	chr5D	517590629	517591231	Wound-induced protease inhibitor
	TRINITY_DN33481_c1_g1	5.46472	2.17e-12	1.02e-10	UP	TRINITY_DN33481_c1_g1	TraesCS2A01G502200.1	415	469	495	7.78e-21	TraesCS2A01G502200	chr2A	729983738	729985530	Universal stress family protein
	TRINITY_DN88698_c1_g1	9.81031	2.21e-12	1.04e-10	UP	NA	NA	NA	NA	NA	NA	NA	NA	NA	NA	NA
	TRINITY_DN173604_c0_g1	9.47899	2.23e-12	1.05e-10	UP	NA	NA	NA	NA	NA	NA	NA	NA	NA	NA	NA
	TRINITY_DN29721_c0_g1	11.9995	2.23e-12	1.05e-10	UP	TRINITY_DN29721_c0_g1	TraesCS6A01G374800.1	313	254	321	8.16e-14	TraesCS6A01G374800	chr6A	597362227	597362547	L-arabinose isomerase
	TRINITY_DN22758_c0_g1	5.66724	2.25e-12	1.05e-10	UP	NA	NA	NA	NA	NA	NA	NA	NA	NA	NA	NA
	TRINITY_DN68642_c2_g1	11.7878	2.29e-12	1.08e-10	UP	NA	NA	NA	NA	NA	NA	NA	NA	NA	NA	NA
	TRINITY_DN24243_c0_g1	9.88212	2.3e-12	1.08e-10	UP	NA	NA	NA	NA	NA	NA	NA	NA	NA	NA	NA
	TRINITY_DN33177_c2_g1	10.0846	2.31e-12	1.08e-10	UP	NA	NA	NA	NA	NA	NA	NA	NA	NA	NA	NA
	TRINITY_DN11799_c0_g2	6.66988	2.31e-12	1.08e-10	UP	TRINITY_DN11799_c0_g2	TraesCS7D01G088800.1	24	94	393	5.98e-30	TraesCS7D01G088800	chr7D	53711008	53711611	Early nodulin 93
	TRINITY_DN114153_c0_g1	9.7579	2.34e-12	1.09e-10	UP	TRINITY_DN114153_c0_g1	TraesCS3D01G053400.1	780	584	1158	1.55e-96	TraesCS3D01G053400	chr3D	21903938	21905358	Photosystem II CP47 reaction center protein
	TRINITY_DN17906_c0_g1	7.51041	2.35e-12	1.1e-10	UP	NA	NA	NA	NA	NA	NA	NA	NA	NA	NA	NA
	TRINITY_DN37494_c0_g2	9.46835	2.37e-12	1.1e-10	UP	NA	NA	NA	NA	NA	NA	NA	NA	NA	NA	NA
	TRINITY_DN28470_c0_g1	5.18761	2.4e-12	1.12e-10	UP	TRINITY_DN28470_c0_g1	TraesCS2B01G071200.1	1761	1817	1986	5.49e-13	TraesCS2B01G071200	chr2B	37708291	37710435	disease resistance protein (TIR-NBS-LRR class)
	TRINITY_DN35478_c0_g1	11.6199	2.43e-12	1.13e-10	UP	NA	NA	NA	NA	NA	NA	NA	NA	NA	NA	NA
	TRINITY_DN208355_c0_g1	9.46975	2.45e-12	1.14e-10	UP	NA	NA	NA	NA	NA	NA	NA	NA	NA	NA	NA
	TRINITY_DN57702_c0_g1	5.25002	2.47e-12	1.15e-10	UP	NA	NA	NA	NA	NA	NA	NA	NA	NA	NA	NA
	TRINITY_DN27551_c0_g1	5.69181	2.54e-12	1.18e-10	UP	NA	NA	NA	NA	NA	NA	NA	NA	NA	NA	NA
	TRINITY_DN62619_c0_g1	9.39793	2.58e-12	1.2e-10	UP	TRINITY_DN62619_c0_g1	TraesCS6A01G292400.1	156	341	381	5.88e-67	TraesCS6A01G292400	chr6A	524319512	524319892	Kinesin-like protein
	TRINITY_DN66043_c0_g3	7.19372	2.59e-12	1.2e-10	UP	TRINITY_DN66043_c0_g3	TraesCS3A01G472100.1	1	492	1251	0	TraesCS3A01G472100	chr3A	703303044	703304294	Basic 7S globulin 2
	TRINITY_DN57051_c0_g1	10.4727	2.6e-12	1.21e-10	UP	TRINITY_DN57051_c0_g1	TraesCS4A01G162600.1	159	208	318	6.94e-15	TraesCS4A01G162600	chr4A	358840185	358840615	DNA-directed RNA polymerase subunit beta
	TRINITY_DN26383_c0_g1	6.34698	2.61e-12	1.21e-10	UP	NA	NA	NA	NA	NA	NA	NA	NA	NA	NA	NA
	TRINITY_DN865_c0_g2	4.23805	2.62e-12	1.22e-10	UP	TRINITY_DN865_c0_g2	TraesCS4D01G207500.1	1791	1956	1956	7.94e-82	TraesCS4D01G207500	chr4D	355858489	355860561	70 kDa heat shock protein
	TRINITY_DN16097_c0_g1	4.52787	2.65e-12	1.23e-10	UP	TRINITY_DN16097_c0_g1	TraesCS2D01G096000.1	286	987	987	0	TraesCS2D01G096000	chr2D	48133084	48134070	MYB transcription factor
	TRINITY_DN165081_c0_g1	9.44034	2.66e-12	1.23e-10	UP	NA	NA	NA	NA	NA	NA	NA	NA	NA	NA	NA
	TRINITY_DN2365_c0_g1	4.23713	2.66e-12	1.23e-10	UP	TRINITY_DN2365_c0_g1	TraesCS6D01G369300.1	1	831	831	0	TraesCS6D01G369300	chr6D	456092952	456094004	PPPDE thiol peptidase family protein, putative
	TRINITY_DN73766_c0_g1	9.69164	2.75e-12	1.27e-10	UP	TRINITY_DN73766_c0_g1	TraesCS4A01G193900.1	1342	1405	1881	2.89e-24	TraesCS4A01G193900	chr4A	475902731	475906968	Vacuolar sorting receptor family protein
	TRINITY_DN35819_c0_g2	10.2323	2.76e-12	1.27e-10	UP	NA	NA	NA	NA	NA	NA	NA	NA	NA	NA	NA
	TRINITY_DN101205_c2_g1	3.78999	2.77e-12	1.28e-10	UP	NA	NA	NA	NA	NA	NA	NA	NA	NA	NA	NA
	TRINITY_DN27570_c0_g1	10.4469	2.78e-12	1.28e-10	UP	TRINITY_DN27570_c0_g1	TraesCS6B01G414000.1	1202	1346	2403	6.5e-71	TraesCS6B01G414000	chr6B	687177971	687180657	Receptor-like protein kinase
	TRINITY_DN42195_c0_g1	9.48671	2.79e-12	1.29e-10	UP	TRINITY_DN42195_c0_g1	TraesCS4B01G205700.1	1302	1536	1974	8.84e-103	TraesCS4B01G205700	chr4B	437949085	437951192	70 kDa heat shock protein
	TRINITY_DN10866_c0_g3	7.02523	2.82e-12	1.3e-10	UP	TRINITY_DN10866_c0_g3	TraesCS6B01G338300.1	1	1074	1074	0	TraesCS6B01G338300	chr6B	596594164	596595237	Ribosomal protein S4
	TRINITY_DN5981_c0_g1	2.95477	2.83e-12	1.3e-10	UP	NA	NA	NA	NA	NA	NA	NA	NA	NA	NA	NA
	TRINITY_DN64590_c0_g1	6.84967	2.86e-12	1.32e-10	UP	TRINITY_DN64590_c0_g1	TraesCS6B01G213000.1	568	445	1020	3.8e-42	TraesCS6B01G213000	chr6B	286711940	286712959	alpha-adaptin
	TRINITY_DN28288_c0_g1	11.6242	3e-12	1.38e-10	UP	TRINITY_DN28288_c0_g1	TraesCS7B01G027300.1	1125	1072	1197	1.36e-14	TraesCS7B01G027300	chr7B	26033369	26034565	F-box protein
	TRINITY_DN44876_c0_g1	7.94965	3.01e-12	1.38e-10	UP	TRINITY_DN44876_c0_g1	TraesCS2A01G489800.1	1765	1660	2658	1.37e-40	TraesCS2A01G489800	chr2A	723539088	723542524	Leucine-rich repeat receptor-like protein kinase family protein
	TRINITY_DN28231_c0_g1	4.24475	3.05e-12	1.4e-10	UP	NA	NA	NA	NA	NA	NA	NA	NA	NA	NA	NA
	TRINITY_DN2188_c0_g1	2.60142	3.07e-12	1.41e-10	UP	TRINITY_DN2188_c0_g1	TraesCS2D01G493700.1	1	1029	1029	0	TraesCS2D01G493700	chr2D	591027331	591031519	Protein kinase
	TRINITY_DN5505_c3_g1	4.58459	3.09e-12	1.42e-10	UP	NA	NA	NA	NA	NA	NA	NA	NA	NA	NA	NA
	TRINITY_DN111531_c0_g1	9.4118	3.12e-12	1.43e-10	UP	NA	NA	NA	NA	NA	NA	NA	NA	NA	NA	NA
	TRINITY_DN4212_c0_g1	4.56418	3.18e-12	1.45e-10	UP	TRINITY_DN4212_c0_g1	TraesCS7A01G553800.1	1	652	1530	0	TraesCS7A01G553800	chr7A	726481932	726485190	MYB-related protein
	TRINITY_DN19587_c0_g1	4.80002	3.23e-12	1.48e-10	UP	TRINITY_DN19587_c0_g1	TraesCS1D01G409900.1	361	429	558	4.24e-23	TraesCS1D01G409900	chr1D	471606088	471606857	Beta-adaptin-like protein
	TRINITY_DN20950_c0_g2	2.99039	3.26e-12	1.49e-10	UP	TRINITY_DN20950_c0_g2	TraesCS7D01G352400.1	698	242	1158	0	TraesCS7D01G352400	chr7D	454071067	454072493	Kelch repeat protein
	TRINITY_DN18040_c0_g2	7.69517	3.28e-12	1.49e-10	UP	TRINITY_DN18040_c0_g2	TraesCS3A01G216800.1	286	108	576	9.25e-90	TraesCS3A01G216800	chr3A	395757730	395761295	Chaperone protein DnaJ
	TRINITY_DN43026_c0_g1	4.16417	3.28e-12	1.5e-10	UP	TRINITY_DN43026_c0_g1	TraesCS4A01G005800.1	1	831	831	0	TraesCS4A01G005800	chr4A	3387764	3388594	Ethylene-responsive transcription factor
	TRINITY_DN38993_c0_g1	13.065	3.29e-12	1.5e-10	UP	NA	NA	NA	NA	NA	NA	NA	NA	NA	NA	NA
	TRINITY_DN31308_c0_g2	9.40324	3.44e-12	1.56e-10	UP	NA	NA	NA	NA	NA	NA	NA	NA	NA	NA	NA
	TRINITY_DN31413_c0_g1	4.17792	3.46e-12	1.57e-10	UP	TRINITY_DN31413_c0_g1	TraesCS3D01G402900.1	1	59	1140	1.95e-22	TraesCS3D01G402900	chr3D	516999803	517002024	F-box family protein
	TRINITY_DN24675_c0_g2	6.759	3.47e-12	1.57e-10	UP	TRINITY_DN24675_c0_g2	TraesCS1D01G051900.1	1	89	1029	4.09e-39	TraesCS1D01G051900	chr1D	32544107	32546651	Arginine/serine-rich splicing factor, putative
	TRINITY_DN188036_c0_g1	9.44643	3.51e-12	1.59e-10	UP	NA	NA	NA	NA	NA	NA	NA	NA	NA	NA	NA
	TRINITY_DN76941_c0_g2	5.89027	3.53e-12	1.6e-10	UP	TRINITY_DN76941_c0_g2	TraesCS7D01G540700.1	240	376	1176	3.15e-58	TraesCS7D01G540700	chr7D	630527242	630530005	MYB-related protein
	TRINITY_DN35427_c0_g1	10.0217	3.56e-12	1.61e-10	UP	NA	NA	NA	NA	NA	NA	NA	NA	NA	NA	NA
	TRINITY_DN37130_c0_g1	3.34586	3.56e-12	1.61e-10	UP	TRINITY_DN37130_c0_g1	TraesCSU01G130000.2	543	788	1143	1.95e-111	TraesCSU01G130000	chrUn	110522968	110526146	Man1-Src1p-carboxy-terminal domain protein
	TRINITY_DN1194_c1_g1	2.37472	3.57e-12	1.62e-10	UP	TRINITY_DN1194_c1_g1	TraesCS1B01G308400.1	2424	2372	2424	3.22e-19	TraesCS1B01G308400	chr1B	531004951	531012830	F-box protein
	TRINITY_DN4204_c1_g1	3.86726	3.66e-12	1.65e-10	UP	TRINITY_DN4204_c1_g1	TraesCS1A01G235800.1	728	787	981	1.32e-17	TraesCS1A01G235800	chr1A	417398129	417409847	L-lactate dehydrogenase
	TRINITY_DN56474_c0_g1	9.84684	3.7e-12	1.67e-10	UP	NA	NA	NA	NA	NA	NA	NA	NA	NA	NA	NA
	TRINITY_DN64130_c0_g3	9.78451	3.71e-12	1.68e-10	UP	TRINITY_DN64130_c0_g3	TraesCS4A01G105700.1	47	1	2514	3.36e-16	TraesCS4A01G105700	chr4A	119787889	119795866	Pentatricopeptide repeat-containing protein
	TRINITY_DN17941_c0_g1	2.74733	3.76e-12	1.7e-10	UP	TRINITY_DN17941_c0_g1	TraesCS1B01G137200.1	1	74	336	1.09e-31	TraesCS1B01G137200	chr1B	175275297	175275995	Pentatricopeptide repeat-containing protein
	TRINITY_DN76294_c0_g1	9.36874	3.77e-12	1.7e-10	UP	NA	NA	NA	NA	NA	NA	NA	NA	NA	NA	NA
	TRINITY_DN9393_c0_g2	4.39485	3.81e-12	1.72e-10	UP	NA	NA	NA	NA	NA	NA	NA	NA	NA	NA	NA
	TRINITY_DN94760_c0_g1	9.37309	3.84e-12	1.73e-10	UP	NA	NA	NA	NA	NA	NA	NA	NA	NA	NA	NA
	TRINITY_DN27873_c0_g1	9.91694	3.9e-12	1.76e-10	UP	TRINITY_DN27873_c0_g1	TraesCS3D01G294300.1	242	313	651	4.7e-28	TraesCS3D01G294300	chr3D	405818751	405823311	Calcyclin-binding protein
	TRINITY_DN17542_c0_g1	7.48398	3.92e-12	1.76e-10	UP	TRINITY_DN17542_c0_g1	TraesCS6A01G083200.1	109	152	744	3.2e-14	TraesCS6A01G083200	chr6A	51947908	51953052	Bax inhibitor 1-like protein
	TRINITY_DN97523_c0_g2	11.5309	3.94e-12	1.78e-10	UP	NA	NA	NA	NA	NA	NA	NA	NA	NA	NA	NA
	TRINITY_DN19384_c0_g2	8.7617	3.98e-12	1.79e-10	UP	NA	NA	NA	NA	NA	NA	NA	NA	NA	NA	NA
	TRINITY_DN79102_c0_g3	10.8789	4e-12	1.8e-10	UP	NA	NA	NA	NA	NA	NA	NA	NA	NA	NA	NA
	TRINITY_DN37760_c0_g1	3.83362	4.02e-12	1.81e-10	UP	NA	NA	NA	NA	NA	NA	NA	NA	NA	NA	NA
	TRINITY_DN2582_c0_g1	3.07403	4.05e-12	1.82e-10	UP	TRINITY_DN2582_c0_g1	TraesCS5B01G407200.1	1	642	642	0	TraesCS5B01G407200	chr5B	582975172	582976443	Maternal effect embryo arrest 14-1
	TRINITY_DN107774_c0_g1	10.2047	4.09e-12	1.84e-10	UP	TRINITY_DN107774_c0_g1	TraesCS7A01G177900.1	638	693	693	1.21e-21	TraesCS7A01G177900	chr7A	131811907	131815727	Polyadenylate-binding protein family protein
	TRINITY_DN15390_c1_g1	5.16057	4.15e-12	1.86e-10	UP	TRINITY_DN15390_c1_g1	TraesCS1B01G456500.1	1	896	1809	0	TraesCS1B01G456500	chr1B	670956629	670958537	S-type anion channel
	TRINITY_DN1287_c2_g1	2.91034	4.23e-12	1.9e-10	UP	TRINITY_DN1287_c2_g1	TraesCS4A01G010000.1	1	180	1305	6.18e-89	TraesCS4A01G010000	chr4A	5835562	5839872	Kinase-like protein
	TRINITY_DN41832_c0_g1	9.60218	4.29e-12	1.92e-10	UP	NA	NA	NA	NA	NA	NA	NA	NA	NA	NA	NA
	TRINITY_DN8104_c1_g3	8.2097	4.34e-12	1.94e-10	UP	NA	NA	NA	NA	NA	NA	NA	NA	NA	NA	NA
	TRINITY_DN15956_c0_g2	3.72522	4.38e-12	1.96e-10	UP	NA	NA	NA	NA	NA	NA	NA	NA	NA	NA	NA
	TRINITY_DN461_c0_g2	3.17765	4.41e-12	1.97e-10	UP	TRINITY_DN461_c0_g2	TraesCS5D01G027500.1	1	330	708	9.41e-174	TraesCS5D01G027500	chr5D	25042309	25043089	Glutathione S-transferase
	TRINITY_DN56635_c0_g1	9.57558	4.41e-12	1.97e-10	UP	TRINITY_DN56635_c0_g1	TraesCS6D01G092600.1	586	657	1773	1.41e-30	TraesCS6D01G092600	chr6D	57998202	58003563	SPT2 chromatin protein
	TRINITY_DN2458_c0_g1	4.23863	4.5e-12	2.01e-10	UP	TRINITY_DN2458_c0_g1	TraesCS3A01G182400.1	1	258	258	3.94e-133	TraesCS3A01G182400	chr3A	211953807	211954515	tRNA (uracil-O(2)-)-methyltransferase
	TRINITY_DN36538_c1_g1	7.52726	4.51e-12	2.01e-10	UP	NA	NA	NA	NA	NA	NA	NA	NA	NA	NA	NA
	TRINITY_DN15136_c0_g3	2.67724	4.55e-12	2.03e-10	UP	TRINITY_DN15136_c0_g3	TraesCS2A01G152000.1	147	174	174	9.09e-06	TraesCS2A01G152000	chr2A	100129408	100129674	Low temperature and salt responsive protein
	TRINITY_DN2885_c0_g3	4.24981	4.58e-12	2.04e-10	UP	TRINITY_DN2885_c0_g3	TraesCS2B01G501900.1	1	612	612	0	TraesCS2B01G501900	chr2B	697223702	697224793	callose synthase 1
	TRINITY_DN17035_c2_g1	6.26369	4.6e-12	2.05e-10	UP	NA	NA	NA	NA	NA	NA	NA	NA	NA	NA	NA
	TRINITY_DN1386_c2_g2	2.73596	4.62e-12	2.06e-10	UP	NA	NA	NA	NA	NA	NA	NA	NA	NA	NA	NA
	TRINITY_DN144509_c1_g2	9.36376	4.67e-12	2.08e-10	UP	NA	NA	NA	NA	NA	NA	NA	NA	NA	NA	NA
	TRINITY_DN3420_c0_g1	3.08978	4.73e-12	2.11e-10	UP	TRINITY_DN3420_c0_g1	TraesCS7A01G389700.1	40	156	156	9.41e-32	TraesCS7A01G389700	chr7A	566021142	566021297	Phenylalanine--tRNA ligase beta subunit
	TRINITY_DN41743_c0_g1	12.3956	4.81e-12	2.14e-10	UP	NA	NA	NA	NA	NA	NA	NA	NA	NA	NA	NA
	TRINITY_DN4285_c0_g2	4.9737	4.96e-12	2.21e-10	UP	TRINITY_DN4285_c0_g2	TraesCS5B01G272800.1	1260	669	1407	0	TraesCS5B01G272800	chr5B	458386082	458387867	WD-repeat cell cycle regulatory protein
	TRINITY_DN17577_c0_g1	12.9855	5.03e-12	2.23e-10	UP	TRINITY_DN17577_c0_g1	TraesCS6A01G374800.1	1	203	321	7.39e-85	TraesCS6A01G374800	chr6A	597362227	597362547	L-arabinose isomerase
	TRINITY_DN51355_c0_g1	9.7771	5.03e-12	2.23e-10	UP	NA	NA	NA	NA	NA	NA	NA	NA	NA	NA	NA
	TRINITY_DN84999_c0_g1	9.7771	5.03e-12	2.23e-10	UP	TRINITY_DN84999_c0_g1	TraesCS2A01G246900.1	2851	2911	2973	1.81e-24	TraesCS2A01G246900	chr2A	362433270	362455521	Valine--tRNA ligase
	TRINITY_DN11830_c0_g2	4.90992	5.07e-12	2.25e-10	UP	NA	NA	NA	NA	NA	NA	NA	NA	NA	NA	NA
	TRINITY_DN27618_c0_g1	11.2847	5.08e-12	2.25e-10	UP	NA	NA	NA	NA	NA	NA	NA	NA	NA	NA	NA
	TRINITY_DN41141_c0_g1	9.67576	5.11e-12	2.26e-10	UP	TRINITY_DN41141_c0_g1	TraesCS4D01G003700.1	419	693	3948	1.33e-131	TraesCS4D01G003700	chr4D	1621299	1626986	Retrotransposon protein, putative, Ty1-copia subclass
	TRINITY_DN3704_c0_g1	2.8963	5.21e-12	2.31e-10	UP	TRINITY_DN3704_c0_g1	TraesCS3A01G383700.1	1	263	4194	1.55e-134	TraesCS3A01G383700	chr3A	633056279	633064596	Erythroid differentiation-related factor 1-like protein
	TRINITY_DN42830_c0_g1	7.86119	5.25e-12	2.32e-10	UP	NA	NA	NA	NA	NA	NA	NA	NA	NA	NA	NA
	TRINITY_DN15684_c0_g1	3.46338	5.29e-12	2.34e-10	UP	TRINITY_DN15684_c0_g1	TraesCS4A01G356200.1	88	168	633	1.12e-34	TraesCS4A01G356200	chr4A	629862606	629865014	Ferredoxin
	TRINITY_DN31596_c1_g1	6.68497	5.31e-12	2.34e-10	UP	TRINITY_DN31596_c1_g1	TraesCS7A01G551400.1	317	735	735	0	TraesCS7A01G551400	chr7A	725034073	725034807	Ring finger protein, putative
	TRINITY_DN87089_c0_g1	10.5234	5.34e-12	2.36e-10	UP	NA	NA	NA	NA	NA	NA	NA	NA	NA	NA	NA
	TRINITY_DN39891_c0_g1	3.37445	5.37e-12	2.37e-10	UP	TRINITY_DN39891_c0_g1	TraesCS5D01G093900.1	1423	1736	1944	1.48e-156	TraesCS5D01G093900	chr5D	103213394	103216909	70 kDa heat shock protein
	TRINITY_DN217064_c0_g1	10.8307	5.38e-12	2.37e-10	UP	NA	NA	NA	NA	NA	NA	NA	NA	NA	NA	NA
	TRINITY_DN19297_c0_g1	7.33445	5.39e-12	2.37e-10	UP	NA	NA	NA	NA	NA	NA	NA	NA	NA	NA	NA
	TRINITY_DN11112_c0_g2	4.33381	5.42e-12	2.39e-10	UP	TRINITY_DN11112_c0_g2	TraesCS1A01G093800.1	245	305	759	8.96e-24	TraesCS1A01G093800	chr1A	86639280	86640857	Rubber elongation factor protein, putative
	TRINITY_DN4762_c1_g2	12.1936	5.47e-12	2.41e-10	UP	NA	NA	NA	NA	NA	NA	NA	NA	NA	NA	NA
	TRINITY_DN109884_c0_g3	6.88465	5.49e-12	2.41e-10	UP	NA	NA	NA	NA	NA	NA	NA	NA	NA	NA	NA
	TRINITY_DN141532_c0_g1	10.7788	5.54e-12	2.43e-10	UP	NA	NA	NA	NA	NA	NA	NA	NA	NA	NA	NA
	TRINITY_DN15639_c0_g1	2.46283	5.55e-12	2.44e-10	UP	TRINITY_DN15639_c0_g1	TraesCS3D01G512300.2	1	951	951	0	TraesCS3D01G512300	chr3D	596889952	596891598	Beta-1,3-glucanase
	TRINITY_DN31668_c0_g1	5.43653	5.59e-12	2.45e-10	UP	NA	NA	NA	NA	NA	NA	NA	NA	NA	NA	NA
	TRINITY_DN31770_c0_g1	7.47826	5.65e-12	2.48e-10	UP	NA	NA	NA	NA	NA	NA	NA	NA	NA	NA	NA
	TRINITY_DN80587_c0_g1	6.53025	5.72e-12	2.51e-10	UP	NA	NA	NA	NA	NA	NA	NA	NA	NA	NA	NA
	TRINITY_DN20901_c0_g3	4.10164	5.76e-12	2.52e-10	UP	TRINITY_DN20901_c0_g3	TraesCS4A01G413800.1	66	1	111	3.4e-27	TraesCS4A01G413800	chr4A	684615348	684615458	vacuolar ATP synthase catalytic subunit-related / V-ATPase-related / vacuolar proton pump-like protein
	TRINITY_DN52257_c0_g2	9.50037	5.81e-12	2.54e-10	UP	NA	NA	NA	NA	NA	NA	NA	NA	NA	NA	NA
	TRINITY_DN3920_c1_g2	6.51595	5.94e-12	2.6e-10	UP	NA	NA	NA	NA	NA	NA	NA	NA	NA	NA	NA
	TRINITY_DN59019_c0_g2	9.3628	6.06e-12	2.65e-10	UP	TRINITY_DN59019_c0_g2	TraesCS3A01G321100.1	261	319	1593	2.81e-16	TraesCS3A01G321100	chr3A	564437639	564441823	Cytokinin oxidase/dehydrogenase
	TRINITY_DN2_c0_g1	2.84826	6.18e-12	2.7e-10	UP	TRINITY_DN2_c0_g1	TraesCS5D01G303600.1	1	425	615	0	TraesCS5D01G303600	chr5D	399156743	399158756	UPF0664 stress-induced protein C29B12.11c
	TRINITY_DN39351_c1_g1	3.9429	6.2e-12	2.71e-10	UP	TRINITY_DN39351_c1_g1	TraesCS4D01G119400.1	1486	1578	1878	3.44e-42	TraesCS4D01G119400	chr4D	100571621	100575457	Vacuolar sorting receptor family protein
	TRINITY_DN62747_c0_g1	4.29143	6.3e-12	2.75e-10	UP	TRINITY_DN62747_c0_g1	TraesCS3B01G123000.1	483	548	603	4.15e-27	TraesCS3B01G123000	chr3B	94666367	94668323	Translation machinery-associated protein 22
	TRINITY_DN50140_c0_g2	9.9409	6.3e-12	2.75e-10	UP	NA	NA	NA	NA	NA	NA	NA	NA	NA	NA	NA
	TRINITY_DN17879_c0_g1	4.05003	6.44e-12	2.8e-10	UP	TRINITY_DN17879_c0_g1	TraesCS7D01G238600.1	1	1725	1725	0	TraesCS7D01G238600	chr7D	203513224	203514948	Cytochrome c biogenesis FN
	TRINITY_DN49949_c0_g2	9.75824	6.56e-12	2.85e-10	UP	NA	NA	NA	NA	NA	NA	NA	NA	NA	NA	NA
	TRINITY_DN93045_c2_g1	2.84253	6.56e-12	2.85e-10	UP	TRINITY_DN93045_c2_g1	TraesCS5A01G426100.1	1266	1040	1266	2.45e-113	TraesCS5A01G426100	chr5A	611339340	611341842	Chaperone protein dnaJ, putative
	TRINITY_DN47465_c0_g1	2.98781	6.56e-12	2.85e-10	UP	TRINITY_DN47465_c0_g1	TraesCS7B01G296800.1	3	64	729	9.63e-25	TraesCS7B01G296800	chr7B	533567633	533571023	PLATZ transcription factor family protein
	TRINITY_DN73851_c1_g1	8.41707	6.59e-12	2.86e-10	UP	NA	NA	NA	NA	NA	NA	NA	NA	NA	NA	NA
	TRINITY_DN121009_c0_g1	10.0511	6.66e-12	2.89e-10	UP	NA	NA	NA	NA	NA	NA	NA	NA	NA	NA	NA
	TRINITY_DN18406_c1_g2	7.28723	6.7e-12	2.91e-10	UP	NA	NA	NA	NA	NA	NA	NA	NA	NA	NA	NA
	TRINITY_DN16590_c0_g1	3.69703	6.71e-12	2.91e-10	UP	NA	NA	NA	NA	NA	NA	NA	NA	NA	NA	NA
	TRINITY_DN47237_c0_g1	10.8578	6.74e-12	2.92e-10	UP	NA	NA	NA	NA	NA	NA	NA	NA	NA	NA	NA
	TRINITY_DN85179_c0_g1	9.89301	6.79e-12	2.94e-10	UP	NA	NA	NA	NA	NA	NA	NA	NA	NA	NA	NA
	TRINITY_DN46831_c2_g1	6.78997	6.92e-12	3e-10	UP	NA	NA	NA	NA	NA	NA	NA	NA	NA	NA	NA
	TRINITY_DN1102_c0_g1	2.58891	6.96e-12	3.01e-10	UP	TRINITY_DN1102_c0_g1	TraesCS3A01G231900.1	1	375	375	8.95e-173	TraesCS3A01G231900	chr3A	433409078	433410427	Tat pathway signal sequence family protein
	TRINITY_DN6456_c0_g1	3.65816	6.99e-12	3.02e-10	UP	TRINITY_DN6456_c0_g1	TraesCS7D01G282500.1	1	893	1065	0	TraesCS7D01G282500	chr7D	288460023	288462154	Activator of 90 kDa heat shock ATPase-like protein
	TRINITY_DN53029_c0_g1	13.6106	7.17e-12	3.1e-10	UP	NA	NA	NA	NA	NA	NA	NA	NA	NA	NA	NA
	TRINITY_DN78011_c0_g1	9.43707	7.17e-12	3.1e-10	UP	NA	NA	NA	NA	NA	NA	NA	NA	NA	NA	NA
	TRINITY_DN74210_c0_g1	9.60627	7.18e-12	3.1e-10	UP	NA	NA	NA	NA	NA	NA	NA	NA	NA	NA	NA
	TRINITY_DN60148_c1_g1	7.01457	7.19e-12	3.1e-10	UP	TRINITY_DN60148_c1_g1	TraesCS2D01G533900.1	1	108	246	5.35e-50	TraesCS2D01G533900	chr2D	618062046	618062291	Wound-responsive family protein
	TRINITY_DN5712_c0_g1	4.58083	7.23e-12	3.12e-10	UP	TRINITY_DN5712_c0_g1	TraesCS3A01G299000.1	456	516	1236	1.15e-23	TraesCS3A01G299000	chr3A	533128217	533130650	Tunicamycin induced 1
	TRINITY_DN2532_c0_g1	3.07678	7.23e-12	3.12e-10	UP	TRINITY_DN2532_c0_g1	TraesCS4B01G232400.1	1	1223	1224	0	TraesCS4B01G232400	chr4B	483908252	483909827	F-box family protein
	TRINITY_DN19581_c0_g2	4.91421	7.33e-12	3.16e-10	UP	NA	NA	NA	NA	NA	NA	NA	NA	NA	NA	NA
	TRINITY_DN4400_c0_g1	4.32711	7.37e-12	3.17e-10	UP	NA	NA	NA	NA	NA	NA	NA	NA	NA	NA	NA
	TRINITY_DN36534_c2_g2	5.5245	7.55e-12	3.24e-10	UP	NA	NA	NA	NA	NA	NA	NA	NA	NA	NA	NA
	TRINITY_DN9828_c0_g1	5.27579	7.56e-12	3.24e-10	UP	NA	NA	NA	NA	NA	NA	NA	NA	NA	NA	NA
	TRINITY_DN37976_c0_g1	8.5077	7.59e-12	3.26e-10	UP	NA	NA	NA	NA	NA	NA	NA	NA	NA	NA	NA
	TRINITY_DN4942_c1_g2	9.3327	7.62e-12	3.26e-10	UP	NA	NA	NA	NA	NA	NA	NA	NA	NA	NA	NA
	TRINITY_DN8353_c0_g1	3.40753	7.73e-12	3.31e-10	UP	TRINITY_DN8353_c0_g1	TraesCS3B01G329100.1	484	654	654	1.63e-82	TraesCS3B01G329100	chr3B	531797235	531801917	Calcyclin-binding protein
	TRINITY_DN69574_c1_g1	4.89171	7.79e-12	3.34e-10	UP	TRINITY_DN69574_c1_g1	TraesCS6D01G104000.1	1	80	870	6.36e-35	TraesCS6D01G104000	chr6D	67569268	67570137	Calcium-dependent lipid-binding domain protein
	TRINITY_DN12827_c0_g1	8.02917	7.94e-12	3.4e-10	UP	NA	NA	NA	NA	NA	NA	NA	NA	NA	NA	NA
	TRINITY_DN33598_c0_g3	9.72746	7.98e-12	3.41e-10	UP	TRINITY_DN33598_c0_g3	TraesCS5D01G368600.3	302	600	600	3.12e-156	TraesCS5D01G368600	chr5D	444534987	444537616	BTB/POZ domain-containing protein POB1
	TRINITY_DN79174_c0_g1	4.44803	8e-12	3.42e-10	UP	TRINITY_DN79174_c0_g1	TraesCS1D01G009100.1	120	265	3225	2.65e-66	TraesCS1D01G009100	chr1D	4821227	4827681	Glucan 1,3-beta-glucosidase
	TRINITY_DN19567_c0_g3	4.61726	8.03e-12	3.43e-10	UP	TRINITY_DN19567_c0_g3	TraesCS5A01G066100.1	1	843	843	0	TraesCS5A01G066100	chr5A	73032592	73033434	Cytochrome c oxidase subunit 3
	TRINITY_DN36415_c1_g1	9.67975	8.11e-12	3.46e-10	UP	TRINITY_DN36415_c1_g1	TraesCS7A01G166300.1	1349	1080	1656	2.53e-94	TraesCS7A01G166300	chr7A	121859745	121880005	Glutathione S-transferase T3
	TRINITY_DN39854_c0_g1	3.88576	8.17e-12	3.49e-10	UP	NA	NA	NA	NA	NA	NA	NA	NA	NA	NA	NA
	TRINITY_DN2988_c0_g1	3.50663	8.32e-12	3.55e-10	UP	TRINITY_DN2988_c0_g1	TraesCS1A01G248200.1	178	957	957	0	TraesCS1A01G248200	chr1A	440184026	440187095	Rhomboid family protein
	TRINITY_DN37354_c1_g1	11.3178	8.39e-12	3.57e-10	UP	NA	NA	NA	NA	NA	NA	NA	NA	NA	NA	NA
	TRINITY_DN204655_c0_g1	5.04426	8.41e-12	3.58e-10	UP	NA	NA	NA	NA	NA	NA	NA	NA	NA	NA	NA
	TRINITY_DN12102_c0_g1	2.93515	8.42e-12	3.59e-10	UP	TRINITY_DN12102_c0_g1	TraesCS2D01G454400.1	1	142	291	4.2e-66	TraesCS2D01G454400	chr2D	562839676	562839966	senescence-associated family protein (DUF581)
	TRINITY_DN14689_c0_g1	3.96138	8.48e-12	3.61e-10	UP	TRINITY_DN14689_c0_g1	TraesCS3A01G073300.1	553	613	762	1.9e-24	TraesCS3A01G073300	chr3A	45570000	45573025	Triosephosphate isomerase
	TRINITY_DN110432_c0_g1	9.38888	8.52e-12	3.62e-10	UP	NA	NA	NA	NA	NA	NA	NA	NA	NA	NA	NA
	TRINITY_DN85951_c0_g1	6.63692	8.56e-12	3.63e-10	UP	NA	NA	NA	NA	NA	NA	NA	NA	NA	NA	NA
	TRINITY_DN18104_c0_g2	3.73708	8.6e-12	3.65e-10	UP	TRINITY_DN18104_c0_g2	TraesCS4B01G306700.1	80	1065	1065	0	TraesCS4B01G306700	chr4B	596282280	596283575	ATP phosphoribosyltransferase
	TRINITY_DN16218_c0_g6	4.93378	8.65e-12	3.67e-10	UP	NA	NA	NA	NA	NA	NA	NA	NA	NA	NA	NA
	TRINITY_DN39144_c0_g2	4.08829	8.69e-12	3.68e-10	UP	NA	NA	NA	NA	NA	NA	NA	NA	NA	NA	NA
	TRINITY_DN1408_c0_g1	3.44746	8.73e-12	3.7e-10	UP	TRINITY_DN1408_c0_g1	TraesCS1A01G190500.1	177	1604	1605	0	TraesCS1A01G190500	chr1A	344290280	344294594	Leucine-rich repeat (LRR) family protein
	TRINITY_DN9202_c0_g3	6.94607	8.74e-12	3.7e-10	UP	TRINITY_DN9202_c0_g3	TraesCS4B01G205700.1	120	1	1974	3.34e-57	TraesCS4B01G205700	chr4B	437949085	437951192	70 kDa heat shock protein
	TRINITY_DN8317_c0_g1	8.55713	8.84e-12	3.74e-10	UP	NA	NA	NA	NA	NA	NA	NA	NA	NA	NA	NA
	TRINITY_DN8435_c1_g1	7.91315	8.87e-12	3.75e-10	UP	TRINITY_DN8435_c1_g1	TraesCS4A01G163100.1	1771	1547	2514	5.92e-71	TraesCS4A01G163100	chr4A	363080324	363122005	Transcription initiation factor TFIID subunit 4b
	TRINITY_DN117590_c0_g1	9.635	8.9e-12	3.76e-10	UP	NA	NA	NA	NA	NA	NA	NA	NA	NA	NA	NA
	TRINITY_DN85568_c0_g1	10.3027	8.97e-12	3.79e-10	UP	NA	NA	NA	NA	NA	NA	NA	NA	NA	NA	NA
	TRINITY_DN60437_c0_g1	6.5358	9.02e-12	3.81e-10	UP	TRINITY_DN60437_c0_g1	TraesCS2A01G076600.1	1	72	1077	1.56e-30	TraesCS2A01G076600	chr2A	34294110	34295260	L-lactate dehydrogenase
	TRINITY_DN40041_c0_g2	10.339	9.02e-12	3.81e-10	UP	NA	NA	NA	NA	NA	NA	NA	NA	NA	NA	NA
	TRINITY_DN12639_c0_g1	5.14136	9.03e-12	3.81e-10	UP	TRINITY_DN12639_c0_g1	TraesCS2A01G487700.1	7	753	753	0	TraesCS2A01G487700	chr2A	722320072	722321195	DNA-directed RNA polymerase subunit beta'
	TRINITY_DN28597_c0_g1	5.01592	9.05e-12	3.82e-10	UP	TRINITY_DN28597_c0_g1	TraesCS2A01G179500.1	384	438	438	6.24e-11	TraesCS2A01G179500	chr2A	138133652	138134089	IgA FC receptor
	TRINITY_DN38754_c0_g1	3.0331	9.09e-12	3.83e-10	UP	TRINITY_DN38754_c0_g1	TraesCS1A01G394400.1	137	436	1590	1.78e-155	TraesCS1A01G394400	chr1A	560403292	560406539	Structural constituent of cell wall
	TRINITY_DN104779_c1_g1	10.7828	9.4e-12	3.96e-10	UP	NA	NA	NA	NA	NA	NA	NA	NA	NA	NA	NA
	TRINITY_DN23531_c0_g1	10.3819	9.47e-12	3.98e-10	UP	NA	NA	NA	NA	NA	NA	NA	NA	NA	NA	NA
	TRINITY_DN93347_c0_g1	11.0579	9.66e-12	4.06e-10	UP	NA	NA	NA	NA	NA	NA	NA	NA	NA	NA	NA
	TRINITY_DN27033_c0_g1	4.30411	9.8e-12	4.12e-10	UP	TRINITY_DN27033_c0_g1	TraesCS6A01G382300.1	1	972	1269	0	TraesCS6A01G382300	chr6A	601396897	601398515	U-box domain-containing family protein
	TRINITY_DN11112_c0_g1	3.47819	9.81e-12	4.12e-10	UP	TRINITY_DN11112_c0_g1	TraesCS1A01G093800.1	245	305	759	5.43e-24	TraesCS1A01G093800	chr1A	86639280	86640857	Rubber elongation factor protein, putative
	TRINITY_DN105433_c0_g1	6.53155	9.94e-12	4.17e-10	UP	TRINITY_DN105433_c0_g1	TraesCS5D01G302800.1	423	500	1554	3.64e-32	TraesCS5D01G302800	chr5D	398782847	398789325	Beta-glucosidase
	TRINITY_DN1604_c1_g1	5.38761	1.03e-11	4.31e-10	UP	TRINITY_DN1604_c1_g1	TraesCS3D01G487500.1	1197	1098	1254	2.24e-24	TraesCS3D01G487500	chr3D	582832099	582833380	U3 small nucleolar RNA-associated protein 18-like protein
	TRINITY_DN1632_c0_g2	3.45394	1.04e-11	4.36e-10	UP	TRINITY_DN1632_c0_g2	TraesCS7D01G352400.1	1158	852	1158	1.2e-157	TraesCS7D01G352400	chr7D	454071067	454072493	Kelch repeat protein
	TRINITY_DN60926_c0_g1	10.2816	1.04e-11	4.38e-10	UP	NA	NA	NA	NA	NA	NA	NA	NA	NA	NA	NA
	TRINITY_DN36946_c0_g1	3.88244	1.05e-11	4.38e-10	UP	TRINITY_DN36946_c0_g1	TraesCS3A01G204700.1	1	297	297	1.81e-97	TraesCS3A01G204700	chr3A	359361599	359361895	Deleted in azoospermia-like
	TRINITY_DN58581_c0_g3	6.64168	1.05e-11	4.38e-10	UP	NA	NA	NA	NA	NA	NA	NA	NA	NA	NA	NA
	TRINITY_DN47816_c0_g1	5.04199	1.05e-11	4.39e-10	UP	TRINITY_DN47816_c0_g1	TraesCS6A01G115400.1	40	317	903	2.78e-143	TraesCS6A01G115400	chr6A	85261630	85262743	Calcium-dependent lipid-binding (CaLB domain) family
	TRINITY_DN152332_c0_g2	7.36978	1.05e-11	4.39e-10	UP	NA	NA	NA	NA	NA	NA	NA	NA	NA	NA	NA
	TRINITY_DN43713_c0_g1	3.34677	1.06e-11	4.41e-10	UP	NA	NA	NA	NA	NA	NA	NA	NA	NA	NA	NA
	TRINITY_DN46784_c1_g1	3.56765	1.06e-11	4.41e-10	UP	TRINITY_DN46784_c1_g1	TraesCS2D01G453400.1	55	279	279	1.08e-108	TraesCS2D01G453400	chr2D	562340782	562341642	senescence-associated family protein (DUF581)
	TRINITY_DN47191_c0_g1	3.24777	1.06e-11	4.42e-10	UP	TRINITY_DN47191_c0_g1	TraesCS3D01G450500.1	907	1105	1110	1.62e-94	TraesCS3D01G450500	chr3D	558724179	558725374	2-oxoglutarate (2OG) and Fe(II)-dependent oxygenase superfamily protein
	TRINITY_DN29297_c0_g1	3.3563	1.06e-11	4.42e-10	UP	TRINITY_DN29297_c0_g1	TraesCS7D01G463000.1	1	878	1065	0	TraesCS7D01G463000	chr7D	578177833	578179047	Auxin response factor
	TRINITY_DN106449_c0_g1	9.70795	1.07e-11	4.47e-10	UP	TRINITY_DN106449_c0_g1	TraesCS4D01G201100.1	332	389	903	8.63e-23	TraesCS4D01G201100	chr4D	348295322	348299501	Glutathione-S-transferase
	TRINITY_DN3481_c0_g2	2.26963	1.09e-11	4.53e-10	UP	NA	NA	NA	NA	NA	NA	NA	NA	NA	NA	NA
	TRINITY_DN18321_c0_g2	11.3487	1.09e-11	4.55e-10	UP	NA	NA	NA	NA	NA	NA	NA	NA	NA	NA	NA
	TRINITY_DN156446_c0_g1	4.42922	1.11e-11	4.61e-10	UP	NA	NA	NA	NA	NA	NA	NA	NA	NA	NA	NA
	TRINITY_DN37532_c1_g2	13.3419	1.16e-11	4.81e-10	UP	TRINITY_DN37532_c1_g2	TraesCS6A01G374800.1	186	313	321	3.39e-28	TraesCS6A01G374800	chr6A	597362227	597362547	L-arabinose isomerase
	TRINITY_DN3458_c0_g2	2.77943	1.16e-11	4.83e-10	UP	TRINITY_DN3458_c0_g2	TraesCS5B01G157600.1	192	1	216	6.24e-94	TraesCS5B01G157600	chr5B	290723991	290724315	vamp/synaptobrevin-associated protein 27-2
	TRINITY_DN23322_c0_g2	5.14416	1.22e-11	5.08e-10	UP	TRINITY_DN23322_c0_g2	TraesCS3A01G044700.1	1	1041	1041	0	TraesCS3A01G044700	chr3A	24037088	24038485	MYB transcription factor
	TRINITY_DN2090_c0_g1	2.72526	1.23e-11	5.08e-10	UP	TRINITY_DN2090_c0_g1	TraesCS1A01G161900.1	254	429	429	2.26e-86	TraesCS1A01G161900	chr1A	290554514	290555958	Thioredoxin
	TRINITY_DN461_c1_g1	4.3025	1.23e-11	5.09e-10	UP	TRINITY_DN461_c1_g1	TraesCS5D01G432600.1	1	668	669	0	TraesCS5D01G432600	chr5D	488783700	488784368	Glutathione-S-transferase
	TRINITY_DN28871_c0_g1	5.82352	1.23e-11	5.1e-10	UP	TRINITY_DN28871_c0_g1	TraesCS4B01G055400.1	957	1252	1383	6.32e-155	TraesCS4B01G055400	chr4B	43791637	43793019	Anthocyanin 5-aromatic acyltransferase
	TRINITY_DN5206_c0_g1	2.72805	1.24e-11	5.13e-10	UP	TRINITY_DN5206_c0_g1	TraesCS5B01G150600.1	1	1743	1743	0	TraesCS5B01G150600	chr5B	278230258	278236986	Nodulin-like / Major Facilitator Superfamily protein
	TRINITY_DN25189_c0_g1	2.96855	1.26e-11	5.2e-10	UP	TRINITY_DN25189_c0_g1	TraesCS3B01G148000.1	1	330	330	1.21e-166	TraesCS3B01G148000	chr3B	139225214	139225543	Alliin lyase
	TRINITY_DN33636_c0_g1	7.2856	1.27e-11	5.26e-10	UP	TRINITY_DN33636_c0_g1	TraesCS2A01G117500.1	216	75	1299	4.91e-67	TraesCS2A01G117500	chr2A	67708675	67713715	Ankyrin repeat protein-like
	TRINITY_DN23480_c0_g2	4.51846	1.28e-11	5.27e-10	UP	TRINITY_DN23480_c0_g2	TraesCS4A01G371600.1	957	820	957	7.19e-64	TraesCS4A01G371600	chr4A	645420263	645423398	Myeloid leukemia factor 1
	TRINITY_DN4196_c0_g2	4.55874	1.28e-11	5.27e-10	UP	TRINITY_DN4196_c0_g2	TraesCS5D01G115400.1	238	549	549	7e-160	TraesCS5D01G115400	chr5D	135062210	135073845	Ubiquitinyl hydrolase 1
	TRINITY_DN119081_c0_g2	10.1005	1.29e-11	5.32e-10	UP	TRINITY_DN119081_c0_g2	TraesCS2D01G253900.2	381	271	522	3.15e-52	TraesCS2D01G253900	chr2D	306252039	306252983	Photosystem II 10 kDa polypeptide family protein
	TRINITY_DN35125_c0_g1	11.3678	1.29e-11	5.34e-10	UP	NA	NA	NA	NA	NA	NA	NA	NA	NA	NA	NA
	TRINITY_DN92426_c0_g1	9.34411	1.32e-11	5.45e-10	UP	NA	NA	NA	NA	NA	NA	NA	NA	NA	NA	NA
	TRINITY_DN10878_c1_g2	11.9896	1.34e-11	5.53e-10	UP	NA	NA	NA	NA	NA	NA	NA	NA	NA	NA	NA
	TRINITY_DN73795_c0_g1	4.88243	1.35e-11	5.56e-10	UP	NA	NA	NA	NA	NA	NA	NA	NA	NA	NA	NA
	TRINITY_DN7537_c0_g2	3.1688	1.37e-11	5.64e-10	UP	TRINITY_DN7537_c0_g2	TraesCSU01G228000.1	149	222	255	2.26e-31	TraesCSU01G228000	chrUn	337950462	337950716	piezo-type mechanosensitive ion channel component
	TRINITY_DN20835_c0_g1	4.46523	1.39e-11	5.72e-10	UP	TRINITY_DN20835_c0_g1	TraesCS2D01G075200.1	963	1077	1077	3.76e-54	TraesCS2D01G075200	chr2D	32150904	32152082	L-lactate dehydrogenase
	TRINITY_DN76699_c0_g3	9.41631	1.4e-11	5.75e-10	UP	TRINITY_DN76699_c0_g3	TraesCS6A01G125200.1	2276	1843	2772	0	TraesCS6A01G125200	chr6A	98810833	98813604	Leucine-rich receptor-like protein kinase family protein
	TRINITY_DN88700_c0_g1	3.90935	1.4e-11	5.77e-10	UP	TRINITY_DN88700_c0_g1	TraesCS2B01G131200.1	268	338	543	5.23e-30	TraesCS2B01G131200	chr2B	98256232	98257121	Universal stress protein
	TRINITY_DN50566_c1_g1	9.28166	1.41e-11	5.78e-10	UP	NA	NA	NA	NA	NA	NA	NA	NA	NA	NA	NA
	TRINITY_DN82049_c0_g1	6.68439	1.41e-11	5.79e-10	UP	TRINITY_DN82049_c0_g1	TraesCS1B01G135200.1	117	1	2457	7.26e-55	TraesCS1B01G135200	chr1B	172006944	172013882	Phospholipase D
	TRINITY_DN24428_c0_g1	4.83575	1.41e-11	5.79e-10	UP	NA	NA	NA	NA	NA	NA	NA	NA	NA	NA	NA
	TRINITY_DN5258_c2_g1	6.34711	1.43e-11	5.88e-10	UP	NA	NA	NA	NA	NA	NA	NA	NA	NA	NA	NA
	TRINITY_DN26768_c2_g1	9.09299	1.44e-11	5.92e-10	UP	NA	NA	NA	NA	NA	NA	NA	NA	NA	NA	NA
	TRINITY_DN21766_c0_g1	5.7698	1.45e-11	5.93e-10	UP	NA	NA	NA	NA	NA	NA	NA	NA	NA	NA	NA
	TRINITY_DN70268_c0_g1	10.5126	1.46e-11	5.95e-10	UP	NA	NA	NA	NA	NA	NA	NA	NA	NA	NA	NA
	TRINITY_DN46798_c0_g1	9.70014	1.47e-11	6.01e-10	UP	TRINITY_DN46798_c0_g1	TraesCS3A01G456000.1	353	561	561	2.45e-78	TraesCS3A01G456000	chr3A	693357495	693358055	Retrovirus-related Pol polyprotein from transposon TNT 1-94
	TRINITY_DN12255_c0_g1	3.67217	1.52e-11	6.23e-10	UP	TRINITY_DN12255_c0_g1	TraesCS5D01G210000.1	1730	1962	2685	5.1e-120	TraesCS5D01G210000	chr5D	318441828	318444874	Trehalose-6-phosphate synthase
	TRINITY_DN27111_c0_g1	6.23848	1.53e-11	6.25e-10	UP	NA	NA	NA	NA	NA	NA	NA	NA	NA	NA	NA
	TRINITY_DN8490_c0_g1	3.98401	1.54e-11	6.3e-10	UP	TRINITY_DN8490_c0_g1	TraesCS1B01G338500.1	242	1389	1389	0	TraesCS1B01G338500	chr1B	566601377	566604244	Cysteine protease family protein
	TRINITY_DN84816_c2_g1	9.27101	1.57e-11	6.41e-10	UP	TRINITY_DN84816_c2_g1	TraesCS3A01G407400.1	250	190	1095	1.78e-24	TraesCS3A01G407400	chr3A	652026292	652029514	magnesium transporter, putative (DUF803)
	TRINITY_DN3722_c0_g2	3.0524	1.66e-11	6.75e-10	UP	TRINITY_DN3722_c0_g2	TraesCS3B01G371200.1	265	939	939	0	TraesCS3B01G371200	chr3B	583391771	583392936	NAC domain-containing protein
	TRINITY_DN13771_c0_g4	11.7763	1.68e-11	6.84e-10	UP	NA	NA	NA	NA	NA	NA	NA	NA	NA	NA	NA
	TRINITY_DN25388_c0_g1	4.51211	1.7e-11	6.93e-10	UP	TRINITY_DN25388_c0_g1	TraesCS5A01G160100.2	1398	1456	1641	2.3e-22	TraesCS5A01G160100	chr5A	341658766	341668920	Aspartate--tRNA ligase
	TRINITY_DN11612_c0_g2	8.9323	1.73e-11	7.01e-10	UP	NA	NA	NA	NA	NA	NA	NA	NA	NA	NA	NA
	TRINITY_DN55329_c0_g1	9.5461	1.74e-11	7.07e-10	UP	TRINITY_DN55329_c0_g1	TraesCS5B01G064000.1	1263	1328	1515	3.08e-27	TraesCS5B01G064000	chr5B	72007486	72010249	Glucan 1,3-beta-glucosidase
	TRINITY_DN26213_c0_g1	5.62743	1.75e-11	7.09e-10	UP	TRINITY_DN26213_c0_g1	TraesCS5B01G490800.1	1	516	516	0	TraesCS5B01G490800	chr5B	659625716	659626231	Zinc finger protein
	TRINITY_DN8974_c0_g1	3.21606	1.76e-11	7.12e-10	UP	NA	NA	NA	NA	NA	NA	NA	NA	NA	NA	NA
	TRINITY_DN51969_c0_g1	3.77838	1.8e-11	7.3e-10	UP	TRINITY_DN51969_c0_g1	TraesCS2A01G532000.1	169	266	267	6.21e-36	TraesCS2A01G532000	chr2A	748685250	748685516	Wound-responsive family protein
	TRINITY_DN109393_c0_g1	6.59924	1.81e-11	7.34e-10	UP	NA	NA	NA	NA	NA	NA	NA	NA	NA	NA	NA
	TRINITY_DN1078_c0_g2	11.6996	1.83e-11	7.42e-10	UP	TRINITY_DN1078_c0_g2	TraesCS2A01G109100.1	638	1	768	0	TraesCS2A01G109100	chr2A	61292139	61293065	Diaminobutyrate--2-oxoglutarate transaminase
	TRINITY_DN46750_c0_g3	5.13	1.85e-11	7.47e-10	UP	TRINITY_DN46750_c0_g3	TraesCSU01G116400.1	2019	1855	2019	3.16e-82	TraesCSU01G116400	chrUn	100323369	100327948	Chaperone DnaK
	TRINITY_DN28183_c0_g1	3.27318	1.85e-11	7.48e-10	UP	TRINITY_DN28183_c0_g1	TraesCS3D01G073000.1	565	632	762	2.56e-28	TraesCS3D01G073000	chr3D	33159459	33162518	Triosephosphate isomerase
	TRINITY_DN31935_c1_g1	8.11341	1.86e-11	7.52e-10	UP	TRINITY_DN31935_c1_g1	TraesCS5B01G388900.1	115	1	750	1.2e-52	TraesCS5B01G388900	chr5B	567873934	567874799	Bax inhibitor-1 family protein
	TRINITY_DN41443_c1_g1	9.34923	1.87e-11	7.56e-10	UP	TRINITY_DN41443_c1_g1	TraesCS7A01G161000.1	341	497	744	7.21e-61	TraesCS7A01G161000	chr7A	117346258	117347900	10 kDa chaperonin
	TRINITY_DN14840_c0_g1	2.73155	1.91e-11	7.68e-10	UP	NA	NA	NA	NA	NA	NA	NA	NA	NA	NA	NA
	TRINITY_DN11025_c0_g1	4.01306	1.92e-11	7.72e-10	UP	TRINITY_DN11025_c0_g1	TraesCS1A01G295600.1	320	684	2052	2.07e-166	TraesCS1A01G295600	chr1A	490510109	490524938	Chaperone DnaK
	TRINITY_DN4369_c0_g1	2.61062	1.92e-11	7.72e-10	UP	TRINITY_DN4369_c0_g1	TraesCS3A01G026100.1	603	119	603	1.64e-167	TraesCS3A01G026100	chr3A	13738823	13739563	Elongation factor 2
	TRINITY_DN41185_c0_g1	9.6681	1.94e-11	7.81e-10	UP	TRINITY_DN41185_c0_g1	TraesCS5A01G383800.1	49	260	1119	4.78e-90	TraesCS5A01G383800	chr5A	581487008	581488298	Heat shock transcription factor
	TRINITY_DN73610_c2_g1	6.25135	1.95e-11	7.83e-10	UP	NA	NA	NA	NA	NA	NA	NA	NA	NA	NA	NA
	TRINITY_DN19820_c1_g3	8.03376	1.95e-11	7.83e-10	UP	TRINITY_DN19820_c1_g3	TraesCS3B01G406100.1	1	294	465	1.21e-153	TraesCS3B01G406100	chr3B	641666585	641667049	Ferredoxin
	TRINITY_DN31096_c0_g1	2.46688	1.99e-11	7.98e-10	UP	TRINITY_DN31096_c0_g1	TraesCS6A01G087800.1	21	117	516	1.33e-32	TraesCS6A01G087800	chr6A	55892278	55893250	Polyubiquitin protein
	TRINITY_DN18220_c0_g2	3.89835	1.99e-11	8.01e-10	UP	TRINITY_DN18220_c0_g2	TraesCS2D01G453400.1	1	157	279	1.35e-77	TraesCS2D01G453400	chr2D	562340782	562341642	senescence-associated family protein (DUF581)
	TRINITY_DN30430_c0_g1	3.84729	2e-11	8.01e-10	UP	NA	NA	NA	NA	NA	NA	NA	NA	NA	NA	NA
	TRINITY_DN58998_c6_g1	8.17892	2.01e-11	8.05e-10	UP	NA	NA	NA	NA	NA	NA	NA	NA	NA	NA	NA
	TRINITY_DN94792_c0_g1	3.84984	2.02e-11	8.12e-10	UP	TRINITY_DN94792_c0_g1	TraesCS2D01G344200.1	378	1692	1692	0	TraesCS2D01G344200	chr2D	440326324	440328268	Malate synthase
	TRINITY_DN57907_c0_g1	3.55822	2.05e-11	8.21e-10	UP	TRINITY_DN57907_c0_g1	TraesCS5A01G314800.1	917	1000	1107	3.39e-37	TraesCS5A01G314800	chr5A	525116056	525117885	UDP-glucose 4-epimerase
	TRINITY_DN5787_c0_g3	4.75772	2.06e-11	8.25e-10	UP	TRINITY_DN5787_c0_g3	TraesCS4D01G140500.1	1	1187	1197	0	TraesCS4D01G140500	chr4D	123729002	123730198	Cytochrome b
	TRINITY_DN10861_c0_g1	8.01372	2.06e-11	8.26e-10	UP	NA	NA	NA	NA	NA	NA	NA	NA	NA	NA	NA
	TRINITY_DN30542_c0_g1	4.07176	2.08e-11	8.31e-10	UP	TRINITY_DN30542_c0_g1	TraesCS1A01G431300.1	1	237	237	3.53e-120	TraesCS1A01G431300	chr1A	583587305	583587663	Type II proteinase inhibitor family protein
	TRINITY_DN8367_c0_g2	7.3607	2.08e-11	8.33e-10	UP	NA	NA	NA	NA	NA	NA	NA	NA	NA	NA	NA
	TRINITY_DN21057_c0_g1	4.96226	2.13e-11	8.51e-10	UP	NA	NA	NA	NA	NA	NA	NA	NA	NA	NA	NA
	TRINITY_DN1192_c0_g1	3.82577	2.14e-11	8.54e-10	UP	TRINITY_DN1192_c0_g1	TraesCS7A01G554600.1	6	427	468	5.09e-106	TraesCS7A01G554600	chr7A	726905999	726907908	eukaryotic release factor 1-1
	TRINITY_DN132776_c0_g1	9.30832	2.14e-11	8.55e-10	UP	NA	NA	NA	NA	NA	NA	NA	NA	NA	NA	NA
	TRINITY_DN81145_c4_g1	6.48258	2.14e-11	8.56e-10	UP	NA	NA	NA	NA	NA	NA	NA	NA	NA	NA	NA
	TRINITY_DN7695_c1_g1	7.39979	2.14e-11	8.56e-10	UP	NA	NA	NA	NA	NA	NA	NA	NA	NA	NA	NA
	TRINITY_DN66043_c0_g1	9.25431	2.15e-11	8.58e-10	UP	TRINITY_DN66043_c0_g1	TraesCS3A01G472000.1	11	398	1257	0	TraesCS3A01G472000	chr3A	703270282	703271538	Basic 7S globulin 2
	TRINITY_DN13813_c0_g3	11.2298	2.17e-11	8.65e-10	UP	NA	NA	NA	NA	NA	NA	NA	NA	NA	NA	NA
	TRINITY_DN53117_c0_g1	7.16573	2.19e-11	8.71e-10	UP	TRINITY_DN53117_c0_g1	TraesCS4A01G362900.1	309	1	309	2.79e-161	TraesCS4A01G362900	chr4A	636323893	636324201	transmembrane protein
	TRINITY_DN38380_c0_g1	9.45565	2.25e-11	8.97e-10	UP	NA	NA	NA	NA	NA	NA	NA	NA	NA	NA	NA
	TRINITY_DN21982_c0_g1	6.06507	2.26e-11	8.98e-10	UP	TRINITY_DN21982_c0_g1	TraesCS7A01G370000.1	434	516	1083	2.34e-34	TraesCS7A01G370000	chr7A	543425044	543428309	UDP-galactose transporter, putative
	TRINITY_DN60407_c0_g1	9.59743	2.26e-11	8.98e-10	UP	NA	NA	NA	NA	NA	NA	NA	NA	NA	NA	NA
	TRINITY_DN195120_c0_g1	9.87606	2.27e-11	9.03e-10	UP	NA	NA	NA	NA	NA	NA	NA	NA	NA	NA	NA
	TRINITY_DN32672_c0_g2	2.96069	2.28e-11	9.05e-10	UP	TRINITY_DN32672_c0_g2	TraesCS2B01G530200.1	987	580	987	0	TraesCS2B01G530200	chr2B	725107374	725111237	Peroxidase
	TRINITY_DN60181_c0_g1	6.65884	2.28e-11	9.05e-10	UP	TRINITY_DN60181_c0_g1	TraesCS4A01G175800.1	71	627	627	0	TraesCS4A01G175800	chr4A	446947342	446948046	DNA ligase
	TRINITY_DN87316_c0_g1	4.27232	2.3e-11	9.12e-10	UP	NA	NA	NA	NA	NA	NA	NA	NA	NA	NA	NA
	TRINITY_DN87475_c0_g1	3.96538	2.33e-11	9.23e-10	UP	TRINITY_DN87475_c0_g1	TraesCS4D01G201100.1	520	583	903	4.12e-26	TraesCS4D01G201100	chr4D	348295322	348299501	Glutathione-S-transferase
	TRINITY_DN103176_c0_g1	9.30142	2.33e-11	9.23e-10	UP	NA	NA	NA	NA	NA	NA	NA	NA	NA	NA	NA
	TRINITY_DN47465_c0_g2	9.81492	2.38e-11	9.4e-10	UP	TRINITY_DN47465_c0_g2	TraesCS7B01G296800.1	3	64	729	6.53e-25	TraesCS7B01G296800	chr7B	533567633	533571023	PLATZ transcription factor family protein
	TRINITY_DN85946_c0_g4	9.81492	2.38e-11	9.4e-10	UP	NA	NA	NA	NA	NA	NA	NA	NA	NA	NA	NA
	TRINITY_DN30649_c0_g2	2.66029	2.38e-11	9.41e-10	UP	TRINITY_DN30649_c0_g2	TraesCS3A01G260800.1	1	711	711	0	TraesCS3A01G260800	chr3A	483743295	483748402	Glutathione S-transferase
	TRINITY_DN37726_c1_g1	3.64054	2.41e-11	9.5e-10	UP	TRINITY_DN37726_c1_g1	TraesCS7A01G270100.1	569	271	1125	6.46e-155	TraesCS7A01G270100	chr7A	276184867	276186319	Heat shock transcription factor
	TRINITY_DN73245_c0_g1	9.45437	2.41e-11	9.51e-10	UP	NA	NA	NA	NA	NA	NA	NA	NA	NA	NA	NA
	TRINITY_DN106984_c0_g1	6.58203	2.41e-11	9.51e-10	UP	TRINITY_DN106984_c0_g1	TraesCS1B01G029700.1	2533	2667	2691	2.48e-46	TraesCS1B01G029700	chr1B	14609435	14626525	TIR-NBS-LRR class disease resistance protein
	TRINITY_DN51624_c0_g1	11.2187	2.42e-11	9.54e-10	UP	NA	NA	NA	NA	NA	NA	NA	NA	NA	NA	NA
	TRINITY_DN60965_c0_g3	4.67055	2.45e-11	9.65e-10	UP	TRINITY_DN60965_c0_g3	TraesCS7D01G174300.1	346	81	2190	3.14e-133	TraesCS7D01G174300	chr7D	126681685	126683874	Scarecrow transcription factor family protein
	TRINITY_DN121344_c0_g1	9.63533	2.46e-11	9.68e-10	UP	NA	NA	NA	NA	NA	NA	NA	NA	NA	NA	NA
	TRINITY_DN11410_c0_g2	7.45681	2.47e-11	9.7e-10	UP	NA	NA	NA	NA	NA	NA	NA	NA	NA	NA	NA
	TRINITY_DN71599_c0_g1	5.8172	2.47e-11	9.72e-10	UP	TRINITY_DN71599_c0_g1	TraesCS1D01G383100.1	25	91	552	5.44e-24	TraesCS1D01G383100	chr1D	457879101	457881061	1,2-dihydroxy-3-keto-5-methylthiopentene dioxygenase
	TRINITY_DN1783_c2_g1	3.65415	2.53e-11	9.94e-10	UP	TRINITY_DN1783_c2_g1	TraesCS2A01G531800.1	191	267	267	5.45e-30	TraesCS2A01G531800	chr2A	748558310	748558576	Wound-responsive family protein
	TRINITY_DN39266_c0_g1	9.46839	2.54e-11	9.96e-10	UP	NA	NA	NA	NA	NA	NA	NA	NA	NA	NA	NA
	TRINITY_DN42254_c2_g1	4.97297	2.54e-11	9.99e-10	UP	NA	NA	NA	NA	NA	NA	NA	NA	NA	NA	NA
	TRINITY_DN780_c0_g1	3.66067	2.55e-11	1e-09	UP	TRINITY_DN780_c0_g1	TraesCS7B01G349000.1	458	231	1587	1.48e-95	TraesCS7B01G349000	chr7B	605906778	605909528	Cytochrome P450
	TRINITY_DN176393_c0_g1	4.94301	2.6e-11	1.02e-09	UP	TRINITY_DN176393_c0_g1	TraesCS3D01G118300.1	1491	1178	1491	7.33e-165	TraesCS3D01G118300	chr3D	72252014	72253630	Transcription factor, putative
	TRINITY_DN17052_c0_g1	3.90891	2.61e-11	1.02e-09	UP	NA	NA	NA	NA	NA	NA	NA	NA	NA	NA	NA
	TRINITY_DN7888_c1_g1	9.22761	2.64e-11	1.03e-09	UP	NA	NA	NA	NA	NA	NA	NA	NA	NA	NA	NA
	TRINITY_DN437_c0_g1	2.95734	2.66e-11	1.04e-09	UP	TRINITY_DN437_c0_g1	TraesCS1B01G294300.1	1	1947	1947	0	TraesCS1B01G294300	chr1B	512172902	512175830	70 kDa heat shock protein
	TRINITY_DN19103_c0_g2	10.6637	2.68e-11	1.05e-09	UP	NA	NA	NA	NA	NA	NA	NA	NA	NA	NA	NA
	TRINITY_DN109318_c0_g1	9.32199	2.71e-11	1.06e-09	UP	NA	NA	NA	NA	NA	NA	NA	NA	NA	NA	NA
	TRINITY_DN205_c0_g1	3.13965	2.75e-11	1.07e-09	UP	TRINITY_DN205_c0_g1	TraesCS5D01G551800.3	1	1737	1737	0	TraesCS5D01G551800	chr5D	557532432	557535140	Poly [ADP-ribose] polymerase
	TRINITY_DN9562_c0_g1	2.79526	2.77e-11	1.08e-09	UP	TRINITY_DN9562_c0_g1	TraesCS1D01G401200.1	1	267	267	1.79e-138	TraesCS1D01G401200	chr1D	467467187	467467838	Clavata3/ESR (CLE) gene family member
	TRINITY_DN51482_c0_g1	10.0202	2.77e-11	1.08e-09	UP	TRINITY_DN51482_c0_g1	TraesCS2D01G121400.1	392	248	1146	4.68e-16	TraesCS2D01G121400	chr2D	70623057	70625575	CONSTANS-like zinc finger protein
	TRINITY_DN24006_c0_g1	3.50348	2.78e-11	1.09e-09	UP	NA	NA	NA	NA	NA	NA	NA	NA	NA	NA	NA
	TRINITY_DN30494_c0_g1	11.1134	2.81e-11	1.09e-09	UP	NA	NA	NA	NA	NA	NA	NA	NA	NA	NA	NA
	TRINITY_DN61821_c0_g1	10.641	2.93e-11	1.14e-09	UP	NA	NA	NA	NA	NA	NA	NA	NA	NA	NA	NA
	TRINITY_DN42874_c0_g1	5.72516	2.95e-11	1.15e-09	UP	TRINITY_DN42874_c0_g1	TraesCS4A01G015500.1	169	249	249	2.43e-35	TraesCS4A01G015500	chr4A	9623214	9623462	ARM repeat superfamily protein
	TRINITY_DN4439_c0_g1	4.29157	2.96e-11	1.15e-09	UP	TRINITY_DN4439_c0_g1	TraesCS3D01G061500.1	1	1547	1548	0	TraesCS3D01G061500	chr3D	26681655	26683701	Cytochrome P450
	TRINITY_DN18024_c2_g1	9.79655	2.97e-11	1.16e-09	UP	NA	NA	NA	NA	NA	NA	NA	NA	NA	NA	NA
	TRINITY_DN88928_c0_g1	9.76417	2.98e-11	1.16e-09	UP	NA	NA	NA	NA	NA	NA	NA	NA	NA	NA	NA
	TRINITY_DN23932_c2_g4	5.67402	3.07e-11	1.19e-09	UP	NA	NA	NA	NA	NA	NA	NA	NA	NA	NA	NA
	TRINITY_DN43687_c0_g2	3.46234	3.07e-11	1.19e-09	UP	TRINITY_DN43687_c0_g2	TraesCS3A01G391500.1	28	74	1077	3.68e-16	TraesCS3A01G391500	chr3A	639248619	639250478	Fructose-bisphosphate aldolase
	TRINITY_DN5338_c0_g1	2.8241	3.17e-11	1.23e-09	UP	TRINITY_DN5338_c0_g1	TraesCS4D01G063000.1	1	1368	1368	0	TraesCS4D01G063000	chr4D	39209085	39212610	Endoplasmic reticulum oxidoreductin-1
	TRINITY_DN44007_c0_g1	10.7871	3.19e-11	1.24e-09	UP	NA	NA	NA	NA	NA	NA	NA	NA	NA	NA	NA
	TRINITY_DN10737_c1_g1	6.14744	3.27e-11	1.27e-09	UP	NA	NA	NA	NA	NA	NA	NA	NA	NA	NA	NA
	TRINITY_DN133199_c0_g1	9.41637	3.3e-11	1.28e-09	UP	NA	NA	NA	NA	NA	NA	NA	NA	NA	NA	NA
	TRINITY_DN38505_c5_g1	3.48023	3.31e-11	1.28e-09	UP	NA	NA	NA	NA	NA	NA	NA	NA	NA	NA	NA
	TRINITY_DN69385_c0_g1	4.20863	3.32e-11	1.28e-09	UP	TRINITY_DN69385_c0_g1	TraesCS1A01G112500.1	11	71	660	8.97e-24	TraesCS1A01G112500	chr1A	114544744	114546388	Ribosomal protein
	TRINITY_DN4728_c0_g2	2.57353	3.32e-11	1.28e-09	UP	TRINITY_DN4728_c0_g2	TraesCS1D01G346200.1	1	443	1710	0	TraesCS1D01G346200	chr1D	433911554	433916532	ATP-dependent 6-phosphofructokinase
	TRINITY_DN67051_c0_g1	3.49504	3.33e-11	1.29e-09	UP	NA	NA	NA	NA	NA	NA	NA	NA	NA	NA	NA
	TRINITY_DN22613_c0_g1	3.99714	3.33e-11	1.29e-09	UP	TRINITY_DN22613_c0_g1	TraesCS5D01G379300.1	1	227	402	1.43e-116	TraesCS5D01G379300	chr5D	450379628	450380396	Dehydrin
	TRINITY_DN33106_c0_g1	6.21369	3.34e-11	1.29e-09	UP	NA	NA	NA	NA	NA	NA	NA	NA	NA	NA	NA
	TRINITY_DN13479_c0_g1	2.26213	3.35e-11	1.29e-09	UP	TRINITY_DN13479_c0_g1	TraesCS6A01G001200.1	341	558	900	5.15e-60	TraesCS6A01G001200	chr6A	734214	735473	Zinc finger protein 512B family
	TRINITY_DN81853_c1_g1	10.7928	3.36e-11	1.3e-09	UP	NA	NA	NA	NA	NA	NA	NA	NA	NA	NA	NA
	TRINITY_DN41912_c0_g3	4.57825	3.38e-11	1.3e-09	UP	NA	NA	NA	NA	NA	NA	NA	NA	NA	NA	NA
	TRINITY_DN28816_c0_g1	11.0847	3.38e-11	1.3e-09	UP	TRINITY_DN28816_c0_g1	TraesCS4A01G087800.1	3656	3715	3840	5.24e-22	TraesCS4A01G087800	chr4A	92725327	92740345	Replication factor C large subunit
	TRINITY_DN63587_c0_g1	3.35476	3.38e-11	1.3e-09	UP	NA	NA	NA	NA	NA	NA	NA	NA	NA	NA	NA
	TRINITY_DN34778_c0_g1	3.61422	3.4e-11	1.31e-09	UP	TRINITY_DN34778_c0_g1	TraesCS1B01G276700.1	10	76	267	1.02e-27	TraesCS1B01G276700	chr1B	484360535	484360926	Wound-induced protease inhibitor
	TRINITY_DN17233_c3_g1	5.90066	3.43e-11	1.32e-09	UP	TRINITY_DN17233_c3_g1	TraesCS5B01G023100.1	68	357	969	6.43e-150	TraesCS5B01G023100	chr5B	21524523	21526593	2-aminoethanethiol dioxygenase
	TRINITY_DN28467_c0_g1	3.2725	3.43e-11	1.32e-09	UP	TRINITY_DN28467_c0_g1	TraesCS2D01G533200.1	2	276	276	6.09e-135	TraesCS2D01G533200	chr2D	617957700	617957975	Wound-responsive family protein
	TRINITY_DN87471_c0_g1	9.6348	3.44e-11	1.32e-09	UP	NA	NA	NA	NA	NA	NA	NA	NA	NA	NA	NA
	TRINITY_DN115436_c1_g1	3.54612	3.45e-11	1.33e-09	UP	TRINITY_DN115436_c1_g1	TraesCS2B01G401300.1	1936	1686	2760	5.46e-130	TraesCS2B01G401300	chr2B	569523119	569526752	CC-NBS-LRR family disease resistance protein
	TRINITY_DN2938_c0_g1	3.20293	3.46e-11	1.33e-09	UP	TRINITY_DN2938_c0_g1	TraesCS3A01G318900.1	1	198	198	5.67e-100	TraesCS3A01G318900	chr3A	561054897	561055342	cysteine-rich/transmembrane domain A-like protein
	TRINITY_DN39689_c0_g1	6.73382	3.52e-11	1.35e-09	UP	TRINITY_DN39689_c0_g1	TraesCS3A01G202100.1	1435	1490	1875	2.91e-20	TraesCS3A01G202100	chr3A	341278188	341295363	U-box domain-containing protein
	TRINITY_DN74792_c0_g1	9.27161	3.54e-11	1.36e-09	UP	NA	NA	NA	NA	NA	NA	NA	NA	NA	NA	NA
	TRINITY_DN18154_c0_g1	2.19707	3.55e-11	1.36e-09	UP	TRINITY_DN18154_c0_g1	TraesCS5A01G337100.1	1627	1777	2583	3.15e-51	TraesCS5A01G337100	chr5A	545632962	545639347	Phospholipase D
	TRINITY_DN28488_c0_g1	3.09144	3.59e-11	1.37e-09	UP	TRINITY_DN28488_c0_g1	TraesCS2B01G122900.1	1	98	1302	4.8e-45	TraesCS2B01G122900	chr2B	90397354	90402129	Alpha-galactosidase
	TRINITY_DN27262_c2_g1	9.21077	3.6e-11	1.38e-09	UP	NA	NA	NA	NA	NA	NA	NA	NA	NA	NA	NA
	TRINITY_DN36216_c0_g1	5.90925	3.61e-11	1.38e-09	UP	NA	NA	NA	NA	NA	NA	NA	NA	NA	NA	NA
	TRINITY_DN54600_c0_g1	10.119	3.69e-11	1.41e-09	UP	NA	NA	NA	NA	NA	NA	NA	NA	NA	NA	NA
	TRINITY_DN31846_c0_g1	3.1976	3.73e-11	1.42e-09	UP	TRINITY_DN31846_c0_g1	TraesCS3D01G073000.1	115	179	762	1.32e-26	TraesCS3D01G073000	chr3D	33159459	33162518	Triosephosphate isomerase
	TRINITY_DN88784_c0_g1	9.21614	3.8e-11	1.45e-09	UP	NA	NA	NA	NA	NA	NA	NA	NA	NA	NA	NA
	TRINITY_DN71293_c0_g2	3.43333	3.83e-11	1.46e-09	UP	TRINITY_DN71293_c0_g2	TraesCS5A01G546000.2	129	550	1146	0	TraesCS5A01G546000	chr5A	700445593	700448598	Inner nuclear membrane Man1
	TRINITY_DN102896_c0_g1	9.2215	3.9e-11	1.49e-09	UP	NA	NA	NA	NA	NA	NA	NA	NA	NA	NA	NA
	TRINITY_DN24280_c0_g2	5.8393	3.91e-11	1.49e-09	UP	NA	NA	NA	NA	NA	NA	NA	NA	NA	NA	NA
	TRINITY_DN219513_c0_g1	6.96938	3.93e-11	1.5e-09	UP	TRINITY_DN219513_c0_g1	TraesCS1A01G324900.1	163	227	861	2.75e-24	TraesCS1A01G324900	chr1A	515588379	515591366	50S ribosomal protein L9
	TRINITY_DN73213_c0_g1	3.16037	4e-11	1.52e-09	UP	TRINITY_DN73213_c0_g1	TraesCS3D01G421300.1	1	101	1395	2.94e-41	TraesCS3D01G421300	chr3D	533723741	533726235	lysine ketoglutarate reductase trans-splicing-like protein, putative (DUF707)
	TRINITY_DN26120_c0_g1	5.28042	4.05e-11	1.54e-09	UP	TRINITY_DN26120_c0_g1	TraesCS4A01G110600.1	145	223	1731	4.91e-32	TraesCS4A01G110600	chr4A	135342841	135346849	Chaperone protein DnaJ
	TRINITY_DN42022_c0_g1	9.35928	4.06e-11	1.54e-09	UP	NA	NA	NA	NA	NA	NA	NA	NA	NA	NA	NA
	TRINITY_DN12629_c0_g1	3.11446	4.07e-11	1.55e-09	UP	TRINITY_DN12629_c0_g1	TraesCS2D01G391700.1	1	516	516	0	TraesCS2D01G391700	chr2D	498805150	498805971	Oxidative stress 3, putative isoform 2
	TRINITY_DN34518_c0_g3	12.1483	4.14e-11	1.57e-09	UP	NA	NA	NA	NA	NA	NA	NA	NA	NA	NA	NA
	TRINITY_DN22317_c0_g1	10.2152	4.14e-11	1.57e-09	UP	NA	NA	NA	NA	NA	NA	NA	NA	NA	NA	NA
	TRINITY_DN88691_c3_g1	11.4006	4.15e-11	1.57e-09	UP	NA	NA	NA	NA	NA	NA	NA	NA	NA	NA	NA
	TRINITY_DN14320_c1_g1	8.00284	4.17e-11	1.58e-09	UP	NA	NA	NA	NA	NA	NA	NA	NA	NA	NA	NA
	TRINITY_DN4385_c2_g2	6.12635	4.19e-11	1.59e-09	UP	TRINITY_DN4385_c2_g2	TraesCS7D01G330500.1	380	1	600	3.86e-99	TraesCS7D01G330500	chr7D	422153081	422153680	Ethylene-responsive transcription factor
	TRINITY_DN5627_c0_g1	2.79833	4.24e-11	1.6e-09	UP	TRINITY_DN5627_c0_g1	TraesCS2D01G119100.1	775	1209	1209	0	TraesCS2D01G119100	chr2D	68732244	68734075	Two-component response regulator
	TRINITY_DN34372_c1_g1	4.83208	4.27e-11	1.61e-09	UP	TRINITY_DN34372_c1_g1	TraesCS3B01G602800.1	1	1556	1803	0	TraesCS3B01G602800	chr3B	822808188	822809990	Plant cadmium resistance protein
	TRINITY_DN3274_c0_g2	9.50146	4.29e-11	1.62e-09	UP	TRINITY_DN3274_c0_g2	TraesCS4D01G035800.1	278	1	1155	2.41e-136	TraesCS4D01G035800	chr4D	16020765	16022120	Pre-mRNA-splicing factor 18
	TRINITY_DN141773_c1_g1	9.30844	4.29e-11	1.62e-09	UP	TRINITY_DN141773_c1_g1	TraesCS6A01G115300.1	167	537	537	0	TraesCS6A01G115300	chr6A	85134374	85134910	don-glucosyltransferase 1
	TRINITY_DN70532_c0_g1	4.59944	4.29e-11	1.62e-09	UP	NA	NA	NA	NA	NA	NA	NA	NA	NA	NA	NA
	TRINITY_DN43548_c1_g3	10.7298	4.31e-11	1.63e-09	UP	TRINITY_DN43548_c1_g3	TraesCS6D01G380900.1	1484	1629	1767	1.61e-49	TraesCS6D01G380900	chr6D	461509616	461511450	Glutathione S-transferase T3
	TRINITY_DN2267_c0_g1	2.58956	4.31e-11	1.63e-09	UP	TRINITY_DN2267_c0_g1	TraesCS7A01G449500.1	45	1587	1587	0	TraesCS7A01G449500	chr7A	643414245	643417032	Cytochrome P450
	TRINITY_DN92786_c0_g1	9.48333	4.34e-11	1.64e-09	UP	TRINITY_DN92786_c0_g1	TraesCS1D01G346200.1	1289	1336	1710	3.19e-17	TraesCS1D01G346200	chr1D	433911554	433916532	ATP-dependent 6-phosphofructokinase
	TRINITY_DN16665_c1_g1	3.7104	4.34e-11	1.64e-09	UP	NA	NA	NA	NA	NA	NA	NA	NA	NA	NA	NA
	TRINITY_DN108523_c0_g1	9.80043	4.35e-11	1.64e-09	UP	TRINITY_DN108523_c0_g1	TraesCS1B01G325600.1	787	820	927	9.49e-08	TraesCS1B01G325600	chr1B	551218727	551219653	Transposon protein, putative, Mutator sub-class
	TRINITY_DN79221_c1_g1	11.7306	4.36e-11	1.64e-09	UP	NA	NA	NA	NA	NA	NA	NA	NA	NA	NA	NA
	TRINITY_DN60141_c0_g1	2.4755	4.45e-11	1.68e-09	UP	TRINITY_DN60141_c0_g1	TraesCS2A01G050600.1	1438	1505	1938	1.17e-26	TraesCS2A01G050600	chr2A	19646183	19652126	Peptidylprolyl isomerase
	TRINITY_DN120285_c0_g1	9.19416	4.5e-11	1.69e-09	UP	NA	NA	NA	NA	NA	NA	NA	NA	NA	NA	NA
	TRINITY_DN263379_c0_g1	9.19416	4.5e-11	1.69e-09	UP	NA	NA	NA	NA	NA	NA	NA	NA	NA	NA	NA
	TRINITY_DN203294_c0_g1	10.597	4.54e-11	1.71e-09	UP	NA	NA	NA	NA	NA	NA	NA	NA	NA	NA	NA
	TRINITY_DN94098_c0_g1	4.09578	4.55e-11	1.71e-09	UP	TRINITY_DN94098_c0_g1	TraesCS6D01G183200.1	2551	2615	2907	2.63e-26	TraesCS6D01G183200	chr6D	219781508	219795714	Phosphoenolpyruvate carboxylase
	TRINITY_DN78237_c0_g1	3.28336	4.55e-11	1.71e-09	UP	TRINITY_DN78237_c0_g1	TraesCS7D01G068700.2	466	1224	1224	0	TraesCS7D01G068700	chr7D	39501113	39510949	tRNA-modifying protein YgfZ
	TRINITY_DN79496_c0_g2	4.71035	4.63e-11	1.74e-09	UP	TRINITY_DN79496_c0_g2	TraesCS5A01G314800.1	949	1011	1107	1.43e-25	TraesCS5A01G314800	chr5A	525116056	525117885	UDP-glucose 4-epimerase
	TRINITY_DN172383_c0_g1	10.3839	4.65e-11	1.75e-09	UP	TRINITY_DN172383_c0_g1	TraesCS4D01G298300.1	1	179	387	5.87e-50	TraesCS4D01G298300	chr4D	467616558	467617195	Trypsin inhibitor
	TRINITY_DN32672_c0_g1	2.86536	4.68e-11	1.75e-09	UP	TRINITY_DN32672_c0_g1	TraesCS2A01G502200.1	431	495	495	1.81e-26	TraesCS2A01G502200	chr2A	729983738	729985530	Universal stress family protein
	TRINITY_DN79306_c0_g1	9.95646	4.7e-11	1.76e-09	UP	NA	NA	NA	NA	NA	NA	NA	NA	NA	NA	NA
	TRINITY_DN29802_c0_g1	6.20139	4.75e-11	1.78e-09	UP	NA	NA	NA	NA	NA	NA	NA	NA	NA	NA	NA
	TRINITY_DN63934_c0_g1	3.91082	4.75e-11	1.78e-09	UP	TRINITY_DN63934_c0_g1	TraesCS2A01G437500.1	1	36	333	1.15e-09	TraesCS2A01G437500	chr2A	689199094	689201548	V-type proton ATPase subunit G
	TRINITY_DN9798_c0_g1	7.59013	4.81e-11	1.8e-09	UP	NA	NA	NA	NA	NA	NA	NA	NA	NA	NA	NA
	TRINITY_DN19251_c0_g1	4.52405	4.92e-11	1.84e-09	UP	TRINITY_DN19251_c0_g1	TraesCS2D01G111700.1	114	162	312	2.87e-17	TraesCS2D01G111700	chr2D	62031836	62034471	Hypoxia-responsive family protein-like
	TRINITY_DN92548_c0_g1	9.2322	4.94e-11	1.84e-09	UP	NA	NA	NA	NA	NA	NA	NA	NA	NA	NA	NA
	TRINITY_DN3152_c1_g1	2.54749	4.94e-11	1.85e-09	UP	NA	NA	NA	NA	NA	NA	NA	NA	NA	NA	NA
	TRINITY_DN161959_c0_g2	6.59431	5e-11	1.87e-09	UP	NA	NA	NA	NA	NA	NA	NA	NA	NA	NA	NA
	TRINITY_DN8366_c0_g1	2.51955	5.03e-11	1.88e-09	UP	TRINITY_DN8366_c0_g1	TraesCS3A01G424800.1	1	319	636	1.22e-166	TraesCS3A01G424800	chr3A	667353188	667354812	Amino acid-ligase
	TRINITY_DN10455_c0_g1	3.2761	5.13e-11	1.91e-09	UP	TRINITY_DN10455_c0_g1	TraesCS4A01G321300.1	1	300	1710	4.5e-157	TraesCS4A01G321300	chr4A	609804687	609807321	Poly [ADP-ribose] polymerase
	TRINITY_DN16699_c1_g1	10.1719	5.2e-11	1.94e-09	UP	NA	NA	NA	NA	NA	NA	NA	NA	NA	NA	NA
	TRINITY_DN545_c0_g2	3.192	5.22e-11	1.94e-09	UP	TRINITY_DN545_c0_g2	TraesCS5B01G443600.1	1	567	567	0	TraesCS5B01G443600	chr5B	616299596	616300162	Pathogenesis-related protein 1
	TRINITY_DN67694_c0_g1	3.80257	5.25e-11	1.95e-09	UP	TRINITY_DN67694_c0_g1	TraesCS4A01G027700.1	540	756	1026	1.72e-109	TraesCS4A01G027700	chr4A	19620363	19622625	Heat shock transcription factor
	TRINITY_DN9995_c0_g1	7.54612	5.33e-11	1.98e-09	UP	NA	NA	NA	NA	NA	NA	NA	NA	NA	NA	NA
	TRINITY_DN5121_c0_g1	6.06148	5.34e-11	1.98e-09	UP	TRINITY_DN5121_c0_g1	TraesCS7D01G158200.1	73	652	654	0	TraesCS7D01G158200	chr7D	105841392	105842068	Gag-Pol polyprotein
	TRINITY_DN1286_c0_g1	2.33239	5.41e-11	2.01e-09	UP	TRINITY_DN1286_c0_g1	TraesCS1A01G139900.1	1	1050	1050	0	TraesCS1A01G139900	chr1A	237744733	237746115	Heavy metal-associated protein
	TRINITY_DN23118_c0_g1	6.31739	5.47e-11	2.03e-09	UP	TRINITY_DN23118_c0_g1	TraesCS5A01G160100.1	1	96	1278	1.03e-43	TraesCS5A01G160100	chr5A	341658766	341668920	Aspartate--tRNA ligase
	TRINITY_DN31308_c0_g3	9.88592	5.47e-11	2.03e-09	UP	TRINITY_DN31308_c0_g3	TraesCS7B01G149300.1	223	4	1794	6.05e-104	TraesCS7B01G149300	chr7B	196911352	196913145	Pentatricopeptide repeat-containing protein
	TRINITY_DN79250_c0_g1	9.89277	5.48e-11	2.03e-09	UP	NA	NA	NA	NA	NA	NA	NA	NA	NA	NA	NA
	TRINITY_DN29034_c0_g2	11.0665	5.48e-11	2.03e-09	UP	NA	NA	NA	NA	NA	NA	NA	NA	NA	NA	NA
	TRINITY_DN9040_c1_g1	4.53471	5.5e-11	2.04e-09	UP	TRINITY_DN9040_c1_g1	TraesCS5B01G405300.1	1	252	963	1.16e-128	TraesCS5B01G405300	chr5B	580843565	580844781	Peroxidase
	TRINITY_DN166699_c0_g2	10.4711	5.51e-11	2.04e-09	UP	NA	NA	NA	NA	NA	NA	NA	NA	NA	NA	NA
	TRINITY_DN19747_c0_g1	3.18133	5.56e-11	2.06e-09	UP	TRINITY_DN19747_c0_g1	TraesCS2A01G253200.1	165	1263	2544	0	TraesCS2A01G253200	chr2A	385003898	385006651	Receptor-like kinase
	TRINITY_DN104208_c1_g1	7.45004	5.59e-11	2.07e-09	UP	NA	NA	NA	NA	NA	NA	NA	NA	NA	NA	NA
	TRINITY_DN30309_c0_g1	4.16872	5.68e-11	2.1e-09	UP	TRINITY_DN30309_c0_g1	TraesCSU01G048500.1	408	685	1548	2.79e-143	TraesCSU01G048500	chrUn	38669418	38671469	Cytochrome P450
	TRINITY_DN99028_c2_g1	9.38234	5.68e-11	2.1e-09	UP	NA	NA	NA	NA	NA	NA	NA	NA	NA	NA	NA
	TRINITY_DN8004_c0_g1	3.92041	5.69e-11	2.1e-09	UP	TRINITY_DN8004_c0_g1	TraesCS4A01G027700.1	1	115	1026	1.93e-52	TraesCS4A01G027700	chr4A	19620363	19622625	Heat shock transcription factor
	TRINITY_DN2262_c0_g3	6.05494	5.72e-11	2.11e-09	UP	NA	NA	NA	NA	NA	NA	NA	NA	NA	NA	NA
	TRINITY_DN31334_c0_g1	5.69115	5.75e-11	2.12e-09	UP	TRINITY_DN31334_c0_g1	TraesCS5A01G438800.1	375	432	744	8.76e-22	TraesCS5A01G438800	chr5A	620175427	620178952	Stem-specific protein TSJT1
	TRINITY_DN157976_c0_g1	9.17779	5.8e-11	2.14e-09	UP	TRINITY_DN157976_c0_g1	TraesCS2D01G546500.2	662	721	1248	6.67e-24	TraesCS2D01G546500	chr2D	622923220	622926759	Calreticulin-like protein
	TRINITY_DN59556_c0_g1	9.17779	5.8e-11	2.14e-09	UP	NA	NA	NA	NA	NA	NA	NA	NA	NA	NA	NA
	TRINITY_DN122480_c1_g1	10.0787	5.88e-11	2.16e-09	UP	TRINITY_DN122480_c1_g1	TraesCS1B01G309900.1	730	128	750	0	TraesCS1B01G309900	chr1B	532682478	532683773	Polynucleotidyl transferase, ribonuclease H-like superfamily protein
	TRINITY_DN19152_c1_g1	3.79968	5.88e-11	2.16e-09	UP	TRINITY_DN19152_c1_g1	TraesCS7B01G437800.1	910	1545	1545	0	TraesCS7B01G437800	chr7B	704109739	704114629	Cytochrome P450
	TRINITY_DN16665_c0_g2	3.87152	5.88e-11	2.16e-09	UP	NA	NA	NA	NA	NA	NA	NA	NA	NA	NA	NA
	TRINITY_DN36000_c0_g1	4.14275	5.91e-11	2.17e-09	UP	NA	NA	NA	NA	NA	NA	NA	NA	NA	NA	NA
	TRINITY_DN29958_c0_g2	10.808	5.92e-11	2.18e-09	UP	TRINITY_DN29958_c0_g2	TraesCS4A01G313300.1	1	99	555	1.9e-45	TraesCS4A01G313300	chr4A	604055487	604056041	AWPM-19-like membrane family protein
[truncated: 7,087 more rows]

## Sheet: Downregulated_M3H_vs_M_gene
	Insight into the mechanisms of terminal HS-tolerance in wheat mutant with improved nutritional quality through de novo transcriptome sequencing Ranjeet R. Kumar, Suman Bakshi, Kavita Dubey, Sumedha Hasija, Gyanendra K. Rai, Neelu Jain, Sanjay Jambhulkar, Bhupinder Singh, Gyanendra P. Singh, & Shelly Praveen
	Table S7 List of differentially expressed transcripts (downregulated) identified in wheat mutant exposed to heat stress through de novo transcriptome sequencing using Illumina HiSeq 4000
	S. No.	logFC	PValue	FDR	DEGType	Trinity_GeneID	Wheat_Transcript_ID	Transcript_Start	Transcript_End	Transcript length	E value	Wheat_Gene_ID	Chromosome	Gene_Start	Gene_End	Description/Protein Name
	TRINITY_DN16967_c0_g1	-14.9756	9.6e-16	7.47e-14	DOWN	TRINITY_DN16967_c0_g1	TraesCS1D01G390900.1	981	1119	1119	1.8e-67	TraesCS1D01G390900	chr1D	462113951	462115551	Cysteine protease
	TRINITY_DN5149_c0_g2	-14.7745	3.93e-19	4.56e-17	DOWN	TRINITY_DN5149_c0_g2	TraesCS1B01G409200.1	19	317	1119	6.43e-150	TraesCS1B01G409200	chr1B	636737982	636739203	Cysteine protease
	TRINITY_DN15468_c0_g1	-13.9048	3.28e-12	1.5e-10	DOWN	TRINITY_DN15468_c0_g1	TraesCS5D01G000200.1	1	191	333	5.86e-95	TraesCS5D01G000200	chr5D	145361	145693	Plant thionin family protein
	TRINITY_DN9296_c0_g1	-13.8518	9.82e-11	3.47e-09	DOWN	TRINITY_DN9296_c0_g1	TraesCS3B01G371800.1	1553	1671	1671	2.28e-56	TraesCS3B01G371800	chr3B	584575221	584577088	L-ascorbate oxidase-like protein
	TRINITY_DN14368_c1_g1	-13.8267	2.5e-15	1.85e-13	DOWN	TRINITY_DN14368_c1_g1	TraesCS4A01G000100.1	151	716	1155	0	TraesCS4A01G000100	chr4A	82124	83278	Pollen allergen Phl p 5
	TRINITY_DN16081_c0_g2	-13.7156	7.77e-19	8.68e-17	DOWN	TRINITY_DN16081_c0_g2	TraesCS6A01G021500.1	329	556	777	6.78e-109	TraesCS6A01G021500	chr6A	10517582	10518358	EF-hand calcium-binding domain-containing protein 5
	TRINITY_DN6804_c0_g2	-13.7114	6.38e-15	4.46e-13	DOWN	TRINITY_DN6804_c0_g2	TraesCS2A01G344200.1	1056	834	1758	1.78e-109	TraesCS2A01G344200	chr2A	580852769	580854644	Pectinesterase
	TRINITY_DN2041_c0_g2	-13.635	4.38e-12	1.96e-10	DOWN	TRINITY_DN2041_c0_g2	TraesCS7B01G304500.1	1	734	1263	0	TraesCS7B01G304500	chr7B	545973790	545975275	Pectin lyase-like superfamily protein
	TRINITY_DN6381_c0_g1	-13.4435	1.71e-06	2.38e-05	DOWN	TRINITY_DN6381_c0_g1	TraesCS6A01G159000.1	1	1251	1251	0	TraesCS6A01G159000	chr6A	150981007	150982336	Pectin lyase-like superfamily protein
	TRINITY_DN4780_c0_g1	-13.4359	2.87e-07	4.91e-06	DOWN	TRINITY_DN4780_c0_g1	TraesCS1D01G011400.1	2266	2717	2895	3.21e-152	TraesCS1D01G011400	chr1D	6264619	6268342	Leucine-rich repeat receptor-like protein kinase family
	TRINITY_DN19110_c1_g1	-13.3538	1.34e-12	6.53e-11	DOWN	TRINITY_DN19110_c1_g1	TraesCS2B01G476800.1	1	326	435	1.01e-164	TraesCS2B01G476800	chr2B	673711480	673712014	senescence-associated family protein (DUF581)
	TRINITY_DN2184_c0_g1	-13.3002	3.24e-08	6.92e-07	DOWN	TRINITY_DN2184_c0_g1	TraesCSU01G143000.1	18	402	402	0	TraesCSU01G143000	chrUn	146406473	146406874	Pollen allergen Cyn d 23
	TRINITY_DN13674_c0_g2	-13.2719	3.09e-15	2.26e-13	DOWN	TRINITY_DN13674_c0_g2	TraesCS2D01G597300.1	1	360	360	3.1e-173	TraesCS2D01G597300	chr2D	649781111	649781640	Low temperature and salt responsive protein
	TRINITY_DN6575_c0_g1	-13.2706	2.28e-12	1.07e-10	DOWN	TRINITY_DN6575_c0_g1	TraesCS2B01G476800.1	232	435	435	4.48e-90	TraesCS2B01G476800	chr2B	673711480	673712014	senescence-associated family protein (DUF581)
	TRINITY_DN11200_c0_g1	-13.0739	2.05e-08	4.57e-07	DOWN	TRINITY_DN11200_c0_g1	TraesCS3B01G014500.1	2	621	621	0	TraesCS3B01G014500	chr3B	6178085	6178705	Fasciclin-like arabinogalactan, putative, expressed
	TRINITY_DN3252_c0_g1	-12.952	2.88e-16	2.41e-14	DOWN	TRINITY_DN3252_c0_g1	TraesCS1B01G409100.1	1	773	822	0	TraesCS1B01G409100	chr1B	636725798	636726971	Cysteine protease
	TRINITY_DN64316_c0_g1	-12.9458	5.57e-14	3.39e-12	DOWN	TRINITY_DN64316_c0_g1	TraesCS1B01G355800.1	1	191	618	1.18e-96	TraesCS1B01G355800	chr1B	585165477	585167209	Inorganic pyrophosphatase family protein
	TRINITY_DN27347_c1_g3	-12.9235	2.78e-09	7.41e-08	DOWN	TRINITY_DN27347_c1_g3	TraesCSU01G035000.1	689	436	789	2.57e-128	TraesCSU01G035000	chrUn	30136993	30137781	non-intrinsic ABC protein 12
	TRINITY_DN23510_c1_g1	-12.8995	2.86e-28	8.3e-26	DOWN	TRINITY_DN23510_c1_g1	TraesCS6B01G149500.1	712	465	1050	1.18e-116	TraesCS6B01G149500	chr6B	150665044	150666478	Plant calmodulin-binding protein-like protein
	TRINITY_DN21842_c0_g1	-12.8155	2.75e-07	4.73e-06	DOWN	TRINITY_DN21842_c0_g1	TraesCS2B01G060800.1	851	993	993	1.07e-69	TraesCS2B01G060800	chr2B	29119026	29120018	Nicotianamine synthase
	TRINITY_DN8225_c1_g1	-12.795	4.4e-10	1.38e-08	DOWN	TRINITY_DN8225_c1_g1	TraesCSU01G035000.1	602	789	789	9.72e-80	TraesCSU01G035000	chrUn	30136993	30137781	non-intrinsic ABC protein 12
	TRINITY_DN21842_c0_g2	-12.7382	2.96e-09	7.88e-08	DOWN	TRINITY_DN21842_c0_g2	TraesCS6D01G370800.1	855	993	993	1.23e-65	TraesCS6D01G370800	chr6D	456540534	456541526	Nicotianamine synthase
	TRINITY_DN12457_c0_g1	-12.6488	1.32e-09	3.77e-08	DOWN	TRINITY_DN12457_c0_g1	TraesCS4B01G027000.1	1	193	783	2.15e-89	TraesCS4B01G027000	chr4B	20355048	20356085	Pollen allergen Phl p 5
	TRINITY_DN1036_c0_g2	-12.6086	9.49e-10	2.79e-08	DOWN	NA	NA	NA	NA	NA	NA	NA	NA	NA	NA	NA
	TRINITY_DN33946_c0_g1	-12.5763	2.74e-18	2.91e-16	DOWN	TRINITY_DN33946_c0_g1	TraesCS6B01G110800.1	334	633	879	1.78e-155	TraesCS6B01G110800	chr6B	92913859	92914737	Pollen allergen Phl p 5
	TRINITY_DN1989_c0_g1	-12.5388	8.95e-14	5.27e-12	DOWN	TRINITY_DN1989_c0_g1	TraesCS2A01G269500.1	301	92	654	6.03e-99	TraesCS2A01G269500	chr2A	435578368	435579131	DUF1685 family protein
	TRINITY_DN41192_c0_g2	-12.5328	3.82e-11	1.46e-09	DOWN	TRINITY_DN41192_c0_g2	TraesCS5A01G497500.1	230	5	300	4.3e-111	TraesCS5A01G497500	chr5A	664554826	664555243	KED-like protein
	TRINITY_DN252_c1_g1	-12.4352	6.04e-09	1.51e-07	DOWN	TRINITY_DN252_c1_g1	TraesCS5A01G000400.1	1106	1134	1134	2.85e-06	TraesCS5A01G000400	chr5A	228101	229326	Actin
	TRINITY_DN720_c0_g2	-12.4337	3.2e-07	5.42e-06	DOWN	TRINITY_DN720_c0_g2	TraesCS2D01G047900.1	1	228	228	4.66e-115	TraesCS2D01G047900	chr2D	17605330	17605703	Defensin
	TRINITY_DN9873_c0_g1	-12.4274	3.18e-09	8.39e-08	DOWN	TRINITY_DN9873_c0_g1	TraesCS2A01G370800.1	1	612	612	0	TraesCS2A01G370800	chr2A	613439936	613441023	LIM domain containing protein
	TRINITY_DN54761_c0_g1	-12.319	5.28e-08	1.08e-06	DOWN	TRINITY_DN54761_c0_g1	TraesCS3B01G079800.1	108	206	261	8.32e-44	TraesCS3B01G079800	chr3B	50418762	50419128	S-locus cysteine-rich protein (SCR)
	TRINITY_DN10507_c0_g3	-12.2294	1.17e-14	7.91e-13	DOWN	TRINITY_DN10507_c0_g3	TraesCS1A01G116100.1	1	328	615	1.1e-170	TraesCS1A01G116100	chr1A	121567788	121568682	Metallothiol transferase fosB
	TRINITY_DN1186_c0_g2	-12.2076	4.37e-10	1.37e-08	DOWN	TRINITY_DN1186_c0_g2	TraesCS4D01G260900.1	334	651	828	9.18e-129	TraesCS4D01G260900	chr4D	431554074	431554901	Pollen allergen Phl p 5
	TRINITY_DN42728_c0_g1	-12.1853	6.2e-12	2.71e-10	DOWN	TRINITY_DN42728_c0_g1	TraesCS1D01G231400.1	1	276	276	4.46e-130	TraesCS1D01G231400	chr1D	319642175	319642544	Late embryogenesis abundant protein
	TRINITY_DN10507_c0_g2	-12.1499	1.37e-13	7.9e-12	DOWN	TRINITY_DN10507_c0_g2	TraesCS1B01G136100.1	328	615	615	1.5e-148	TraesCS1B01G136100	chr1B	173597161	173598141	Metallothiol transferase fosB
	TRINITY_DN5347_c0_g1	-12.0518	9.35e-13	4.68e-11	DOWN	TRINITY_DN5347_c0_g1	TraesCS4A01G000100.1	1	170	1155	1.32e-71	TraesCS4A01G000100	chr4A	82124	83278	Pollen allergen Phl p 5
	TRINITY_DN20947_c0_g2	-12.0489	1.45e-31	5.48e-29	DOWN	TRINITY_DN20947_c0_g2	TraesCS5D01G378600.1	421	221	426	3.65e-76	TraesCS5D01G378600	chr5D	450149205	450149630	V-set and immunoglobulin domain-containing protein 1
	TRINITY_DN14899_c0_g1	-12.0224	7.2e-10	2.16e-08	DOWN	TRINITY_DN14899_c0_g1	TraesCS4A01G171300.1	325	523	1821	7.42e-69	TraesCS4A01G171300	chr4A	434075695	434077515	Pecanex-like protein 1
	TRINITY_DN4905_c0_g1	-12.0107	3.54e-09	9.26e-08	DOWN	TRINITY_DN4905_c0_g1	TraesCS1A01G304100.1	1	238	1680	2.38e-111	TraesCS1A01G304100	chr1A	497496819	497498596	L-ascorbate oxidase-like protein
	TRINITY_DN94722_c0_g1	-11.9716	1.77e-08	4.01e-07	DOWN	TRINITY_DN94722_c0_g1	TraesCS7A01G404700.1	1	144	1263	6.77e-69	TraesCS7A01G404700	chr7A	586692224	586693688	Pectin lyase-like superfamily protein, putative
	TRINITY_DN6697_c0_g1	-11.9302	7.95e-10	2.37e-08	DOWN	TRINITY_DN6697_c0_g1	TraesCS3A01G269700.1	1	1758	1758	0	TraesCS3A01G269700	chr3A	496512544	496514560	Glyoxal oxidase-like
	TRINITY_DN5376_c0_g1	-11.9273	3.42e-06	4.37e-05	DOWN	TRINITY_DN5376_c0_g1	TraesCS1A01G415000.1	1	504	504	0	TraesCS1A01G415000	chr1A	574251732	574252310	Allergen, putative
	TRINITY_DN13575_c1_g1	-11.9094	9.21e-08	1.78e-06	DOWN	TRINITY_DN13575_c1_g1	TraesCS2D01G523700.1	1	944	3054	0	TraesCS2D01G523700	chr2D	612438156	612441574	Pectinesterase
	TRINITY_DN1673_c0_g1	-11.8622	1.52e-08	3.48e-07	DOWN	TRINITY_DN1673_c0_g1	TraesCS4B01G028200.1	1	305	813	1.74e-136	TraesCS4B01G028200	chr4B	21150880	21153353	Pollen allergen Phl p 5
	TRINITY_DN51133_c0_g1	-11.8611	1.01e-05	0.000114637	DOWN	TRINITY_DN51133_c0_g1	TraesCS5A01G552400.1	906	1002	1002	3.12e-44	TraesCS5A01G552400	chr5A	705402280	705403281	Nicotianamine synthase
	TRINITY_DN12841_c0_g1	-11.8426	7.68e-10	2.29e-08	DOWN	TRINITY_DN12841_c0_g1	TraesCS5B01G292600.1	1	1452	1452	0	TraesCS5B01G292600	chr5B	478125645	478129800	Sugar transporter, putative
	TRINITY_DN10739_c0_g1	-11.813	1.5e-06	2.12e-05	DOWN	TRINITY_DN10739_c0_g1	TraesCS4A01G365300.1	1	552	552	0	TraesCS4A01G365300	chr4A	638802544	638803095	Plant invertase/pectin methylesterase inhibitor
	TRINITY_DN12102_c2_g1	-11.8121	3.22e-20	4.3e-18	DOWN	TRINITY_DN12102_c2_g1	TraesCS6B01G289100.1	1	459	459	0	TraesCS6B01G289100	chr6B	520103948	520104934	senescence-associated family protein (DUF581)
	TRINITY_DN11762_c0_g4	-11.7949	5.62e-28	1.56e-25	DOWN	TRINITY_DN11762_c0_g4	TraesCSU01G024800.1	522	639	639	5.19e-44	TraesCSU01G024800	chrUn	24842320	24842958	Proline-rich protein, putative, expressed
	TRINITY_DN15660_c0_g3	-11.7743	1.99e-17	1.92e-15	DOWN	TRINITY_DN15660_c0_g3	TraesCS1B01G029700.1	2528	2674	2691	1.37e-40	TraesCS1B01G029700	chr1B	14609435	14626525	TIR-NBS-LRR class disease resistance protein
	TRINITY_DN3539_c0_g1	-11.7609	8.32e-12	3.55e-10	DOWN	TRINITY_DN3539_c0_g1	TraesCS5B01G215400.1	1	1827	1827	0	TraesCS5B01G215400	chr5B	388405966	388407969	Pectinesterase
	TRINITY_DN30474_c0_g1	-11.7593	1.85e-11	7.47e-10	DOWN	TRINITY_DN30474_c0_g1	TraesCS4B01G027000.1	241	500	783	1.22e-131	TraesCS4B01G027000	chr4B	20355048	20356085	Pollen allergen Phl p 5
	TRINITY_DN13143_c0_g1	-11.755	7.29e-12	3.14e-10	DOWN	TRINITY_DN13143_c0_g1	TraesCS1D01G452800.1	1	1602	1602	0	TraesCS1D01G452800	chr1D	494053876	494055477	Eukaryotic aspartyl protease family protein
	TRINITY_DN36483_c0_g1	-11.7122	9.18e-13	4.6e-11	DOWN	TRINITY_DN36483_c0_g1	TraesCS4D01G130300.1	717	930	1203	1.69e-109	TraesCS4D01G130300	chr4D	116270213	116271415	Kinase family protein
	TRINITY_DN1186_c0_g1	-11.6887	1.2e-09	3.45e-08	DOWN	TRINITY_DN1186_c0_g1	TraesCS4D01G024800.1	414	639	807	1.84e-109	TraesCS4D01G024800	chr4D	10829225	10830031	Pollen allergen Phl p 5
	TRINITY_DN13674_c0_g1	-11.6417	2.35e-11	9.28e-10	DOWN	TRINITY_DN13674_c0_g1	TraesCS2B01G603700.1	210	1	402	1.84e-100	TraesCS2B01G603700	chr2B	785820983	785821555	Low temperature and salt responsive protein
	TRINITY_DN27347_c1_g2	-11.6127	2.17e-07	3.84e-06	DOWN	TRINITY_DN27347_c1_g2	TraesCS4B01G391300.1	760	930	948	8.02e-63	TraesCS4B01G391300	chr4B	667201148	667210897	S-adenosyl-L-methionine-dependent methyltransferases superfamily protein
	TRINITY_DN16081_c0_g3	-11.6068	2.46e-12	1.15e-10	DOWN	TRINITY_DN16081_c0_g3	TraesCS6B01G029200.1	732	909	909	4.81e-81	TraesCS6B01G029200	chr6B	17533809	17534717	gamma carbonic anhydrase-like 2
	TRINITY_DN12146_c0_g1	-11.584	1.11e-06	1.62e-05	DOWN	TRINITY_DN12146_c0_g1	TraesCSU01G142900.1	1	151	402	1.68e-74	TraesCSU01G142900	chrUn	146370727	146371128	Pollen allergen Cyn d 23
	TRINITY_DN19164_c0_g1	-11.5208	7.15e-14	4.26e-12	DOWN	TRINITY_DN19164_c0_g1	TraesCS4B01G267900.1	737	943	1398	5.89e-104	TraesCS4B01G267900	chr4B	541471083	541472995	Carboxypeptidase
	TRINITY_DN26586_c0_g1	-11.5167	1.02e-12	5.04e-11	DOWN	TRINITY_DN26586_c0_g1	TraesCS4A01G248500.1	1	1331	1479	0	TraesCS4A01G248500	chr4A	559162733	559167933	Protein ZINC INDUCED FACILITATOR-LIKE 1
	TRINITY_DN7318_c0_g2	-11.5004	3.32e-12	1.51e-10	DOWN	TRINITY_DN7318_c0_g2	TraesCS6A01G007000.1	1	612	612	0	TraesCS6A01G007000	chr6A	2750961	2751572	Invertase inhibitor
	TRINITY_DN27795_c0_g1	-11.4723	6.58e-07	1.02e-05	DOWN	TRINITY_DN27795_c0_g1	TraesCS7A01G475100.1	1	369	369	0	TraesCS7A01G475100	chr7A	670245239	670245734	MADS-box transcription factor 29
	TRINITY_DN2645_c0_g2	-11.4431	6.29e-13	3.27e-11	DOWN	TRINITY_DN2645_c0_g2	TraesCS5A01G025800.1	494	285	624	2.77e-107	TraesCS5A01G025800	chr5A	20822571	20823194	Cysteine synthase
	TRINITY_DN12264_c1_g1	-11.4172	3.65e-09	9.54e-08	DOWN	TRINITY_DN12264_c1_g1	TraesCS1A01G291100.1	1090	1305	1380	2.88e-102	TraesCS1A01G291100	chr1A	487330631	487333866	Aminotransferase-related family protein
	TRINITY_DN10260_c0_g3	-11.3864	1.55e-09	4.36e-08	DOWN	TRINITY_DN10260_c0_g3	TraesCS7A01G458700.1	27	299	1215	7.64e-139	TraesCS7A01G458700	chr7A	653589482	653593545	MYB-related transcription factor
	TRINITY_DN6663_c1_g1	-11.3656	4.54e-06	5.64e-05	DOWN	TRINITY_DN6663_c1_g1	TraesCS6B01G473200.1	1	131	573	6.7e-44	TraesCS6B01G473200	chr6B	720514756	720515328	Pectinesterase inhibitor
	TRINITY_DN1443_c2_g1	-11.3397	1.23e-24	2.43e-22	DOWN	TRINITY_DN1443_c2_g1	TraesCS3D01G354900.1	1079	1468	1734	0	TraesCS3D01G354900	chr3D	465509059	465511269	Laccase
	TRINITY_DN16334_c0_g1	-11.325	3.39e-19	3.97e-17	DOWN	TRINITY_DN16334_c0_g1	TraesCS1B01G033200.1	630	952	1059	1.9e-155	TraesCS1B01G033200	chr1B	16216483	16217635	Cysteine proteinase
	TRINITY_DN6249_c0_g1	-11.319	1.06e-06	1.57e-05	DOWN	NA	NA	NA	NA	NA	NA	NA	NA	NA	NA	NA
	TRINITY_DN5149_c0_g1	-11.3142	5.37e-07	8.54e-06	DOWN	TRINITY_DN5149_c0_g1	TraesCS2A01G543500.1	91	1074	1074	0	TraesCS2A01G543500	chr2A	753419197	753420622	Cysteine protease
	TRINITY_DN5762_c0_g3	-11.3041	4.35e-10	1.37e-08	DOWN	TRINITY_DN5762_c0_g3	TraesCS3A01G277000.1	388	202	435	1.92e-94	TraesCS3A01G277000	chr3A	507120309	507120903	Profilin
	TRINITY_DN57039_c0_g1	-11.2986	5.21e-15	3.69e-13	DOWN	TRINITY_DN57039_c0_g1	TraesCS7B01G365700.3	1	229	1404	1.62e-105	TraesCS7B01G365700	chr7B	629579751	629582808	Aminotransferase
	TRINITY_DN3135_c0_g2	-11.2966	1.81e-05	0.00019189	DOWN	TRINITY_DN3135_c0_g2	TraesCS6A01G416200.1	16	582	582	0	TraesCS6A01G416200	chr6A	615447278	615447859	Dolichyl-diphosphooligosaccharide--protein glycosyltransferase 48 kDa subunit
	TRINITY_DN21224_c0_g1	-11.2539	7.54e-07	1.15e-05	DOWN	TRINITY_DN21224_c0_g1	TraesCS3B01G120400.1	1	207	207	9.9e-102	TraesCS3B01G120400	chr3B	90170687	90170893	Rapid alkalinization factor (RALF) family protein
	TRINITY_DN35015_c0_g2	-11.2462	7.12e-11	2.58e-09	DOWN	TRINITY_DN35015_c0_g2	TraesCS1B01G152400.1	1	651	651	0	TraesCS1B01G152400	chr1B	243083039	243094988	MOB kinase activator-like 1A
	TRINITY_DN36592_c0_g1	-11.2309	5.42e-10	1.67e-08	DOWN	TRINITY_DN36592_c0_g1	TraesCS4B01G391400.1	11	474	807	6.64e-102	TraesCS4B01G391400	chr4B	667219094	667219900	S-adenosyl-L-methionine-dependent methyltransferases superfamily protein
	TRINITY_DN4712_c0_g2	-11.229	2.48e-21	3.67e-19	DOWN	TRINITY_DN4712_c0_g2	TraesCS5B01G177500.1	594	469	594	6.45e-59	TraesCS5B01G177500	chr5B	323881539	323884125	TPX2 (Targeting protein for Xklp2) family protein
	TRINITY_DN9598_c0_g1	-11.1668	5.06e-08	1.04e-06	DOWN	TRINITY_DN9598_c0_g1	TraesCS5A01G406600.1	1	1624	1698	0	TraesCS5A01G406600	chr5A	597781231	597784940	MLO-like protein
	TRINITY_DN19678_c0_g1	-11.1303	6.37e-08	1.28e-06	DOWN	TRINITY_DN19678_c0_g1	TraesCS2B01G060800.1	254	560	993	5.23e-146	TraesCS2B01G060800	chr2B	29119026	29120018	Nicotianamine synthase
	TRINITY_DN11443_c0_g1	-11.1165	4.3e-08	8.97e-07	DOWN	TRINITY_DN11443_c0_g1	TraesCS2D01G002100.1	428	600	600	1.98e-86	TraesCS2D01G002100	chr2D	1659498	1660097	DNA-BINDING TRANSCRIPTION FACTOR 2
	TRINITY_DN8370_c1_g1	-11.1072	1.06e-05	0.000119481	DOWN	TRINITY_DN8370_c1_g1	TraesCS4B01G183900.1	878	993	993	9.77e-45	TraesCS4B01G183900	chr4B	403253337	403254329	Nicotianamine synthase
	TRINITY_DN10306_c0_g1	-11.0942	3.6e-06	4.59e-05	DOWN	TRINITY_DN10306_c0_g1	TraesCS1D01G348900.1	1577	3444	3444	0	TraesCS1D01G348900	chr1D	435307252	435319990	Alpha-glucan water dikinase
	TRINITY_DN23159_c0_g1	-11.0887	1.49e-09	4.2e-08	DOWN	TRINITY_DN23159_c0_g1	TraesCS5A01G012800.1	1	360	525	2.26e-174	TraesCS5A01G012800	chr5A	8653089	8653613	THO2
	TRINITY_DN19419_c0_g1	-11.0873	9.33e-12	3.93e-10	DOWN	TRINITY_DN19419_c0_g1	TraesCS4A01G171300.1	841	1082	1821	5.51e-95	TraesCS4A01G171300	chr4A	434075695	434077515	Pecanex-like protein 1
	TRINITY_DN17909_c0_g2	-11.0382	9.47e-10	2.78e-08	DOWN	TRINITY_DN17909_c0_g2	TraesCS6D01G370800.1	1	172	993	2.01e-79	TraesCS6D01G370800	chr6D	456540534	456541526	Nicotianamine synthase
	TRINITY_DN18793_c0_g1	-11.0105	6.6e-09	1.64e-07	DOWN	TRINITY_DN18793_c0_g1	TraesCS7D01G398900.1	312	667	1245	3.55e-158	TraesCS7D01G398900	chr7D	515220014	515221770	Pectin lyase-like superfamily protein, putative
	TRINITY_DN7435_c0_g2	-11.0058	4.45e-23	7.76e-21	DOWN	TRINITY_DN7435_c0_g2	TraesCS1A01G283900.1	1	265	1746	2.66e-134	TraesCS1A01G283900	chr1A	481673552	481675855	Laccase
	TRINITY_DN44564_c0_g1	-10.9984	3.11e-22	5.1e-20	DOWN	TRINITY_DN44564_c0_g1	TraesCS3A01G361100.1	11	234	1737	1.07e-106	TraesCS3A01G361100	chr3A	608750119	608752370	Laccase
	TRINITY_DN21161_c0_g1	-10.9837	2.33e-07	4.09e-06	DOWN	TRINITY_DN21161_c0_g1	TraesCS7B01G304100.1	1209	1263	1263	5.76e-21	TraesCS7B01G304100	chr7B	544881151	544882636	Pectin lyase-like superfamily protein
	TRINITY_DN20542_c0_g1	-10.9714	4.34e-07	7.08e-06	DOWN	TRINITY_DN20542_c0_g1	TraesCS6D01G404800.1	676	1685	1686	0	TraesCS6D01G404800	chr6D	472357064	472359115	Calcium-dependent protein kinase
	TRINITY_DN29070_c0_g1	-10.9389	2.31e-10	7.62e-09	DOWN	TRINITY_DN29070_c0_g1	TraesCS3D01G457700.1	858	1132	1866	2.83e-123	TraesCS3D01G457700	chr3D	563417324	563419317	ENTH/ANTH/VHS superfamily protein
	TRINITY_DN12030_c1_g2	-10.9326	2.37e-07	4.15e-06	DOWN	TRINITY_DN12030_c1_g2	TraesCS2B01G280800.1	1	513	513	0	TraesCS2B01G280800	chr2B	387152529	387153148	C2 domain-containing protein-like
	TRINITY_DN5564_c0_g1	-10.9326	8.87e-06	0.000102089	DOWN	TRINITY_DN5564_c0_g1	TraesCS7A01G515200.1	1	498	498	0	TraesCS7A01G515200	chr7A	700822761	700823362	Protein PLANT CADMIUM RESISTANCE 2
	TRINITY_DN11442_c0_g1	-10.9322	6.28e-09	1.56e-07	DOWN	NA	NA	NA	NA	NA	NA	NA	NA	NA	NA	NA
	TRINITY_DN40895_c0_g1	-10.9261	1.46e-05	0.000158791	DOWN	TRINITY_DN40895_c0_g1	TraesCS6A01G163100.1	1	140	981	1.09e-66	TraesCS6A01G163100	chr6A	158316864	158317844	Nicotianamine synthase
	TRINITY_DN36403_c0_g1	-10.9166	5.55e-10	1.7e-08	DOWN	TRINITY_DN36403_c0_g1	TraesCS2B01G616800.1	1	339	339	4.79e-165	TraesCS2B01G616800	chr2B	793791241	793791682	Cytochrome c
	TRINITY_DN3197_c0_g1	-10.9007	0.000180026	0.00151555	DOWN	NA	NA	NA	NA	NA	NA	NA	NA	NA	NA	NA
	TRINITY_DN42405_c0_g2	-10.895	1.4e-09	3.97e-08	DOWN	TRINITY_DN42405_c0_g2	TraesCS3B01G068500.1	149	509	543	5.99e-161	TraesCS3B01G068500	chr3B	40773334	40774332	Nicotianamine synthase
	TRINITY_DN38016_c0_g1	-10.8927	4.18e-16	3.43e-14	DOWN	TRINITY_DN38016_c0_g1	TraesCS5D01G335600.1	339	544	1182	4.53e-105	TraesCS5D01G335600	chr5D	424780098	424781358	Glucan endo-1,3-beta-glucosidase
	TRINITY_DN21561_c0_g1	-10.8835	5.53e-06	6.75e-05	DOWN	TRINITY_DN21561_c0_g1	TraesCS2B01G107500.1	1606	1683	1683	7.65e-34	TraesCS2B01G107500	chr2B	68422552	68424475	Pectinesterase
	TRINITY_DN13655_c0_g1	-10.881	1.61e-19	1.96e-17	DOWN	TRINITY_DN13655_c0_g1	TraesCS3D01G354900.1	286	803	1734	0	TraesCS3D01G354900	chr3D	465509059	465511269	Laccase
	TRINITY_DN9462_c1_g1	-10.8779	1.23e-18	1.35e-16	DOWN	TRINITY_DN9462_c1_g1	TraesCS5B01G427100.1	176	345	453	1.58e-81	TraesCS5B01G427100	chr5B	603451534	603452103	Jasmonate zim-domain protein
	TRINITY_DN94223_c0_g1	-10.8718	1.78e-12	8.52e-11	DOWN	TRINITY_DN94223_c0_g1	TraesCS7D01G452900.1	341	627	1386	2.88e-143	TraesCS7D01G452900	chr7D	572548958	572554767	Aminotransferase
	TRINITY_DN20205_c0_g2	-10.8671	3.76e-08	7.93e-07	DOWN	TRINITY_DN20205_c0_g2	TraesCS4B01G133100.1	1861	2469	2469	0	TraesCS4B01G133100	chr4B	172771782	172776731	Phosphatidylinositol-4-phosphate 5-kinase 4, putative
	TRINITY_DN49655_c0_g1	-10.8392	1.9e-08	4.28e-07	DOWN	TRINITY_DN49655_c0_g1	TraesCS7A01G505100.1	1	204	222	1.09e-103	TraesCS7A01G505100	chr7A	692940676	692940897	DUF3511 domain protein
	TRINITY_DN20774_c0_g1	-10.8263	5.97e-06	7.23e-05	DOWN	TRINITY_DN20774_c0_g1	TraesCSU01G142300.1	1	459	459	0	TraesCSU01G142300	chrUn	141676823	141677281	Plant cadmium resistance 2-like protein
	TRINITY_DN11109_c0_g1	-10.7711	1.58e-10	5.37e-09	DOWN	TRINITY_DN11109_c0_g1	TraesCS1D01G144300.1	1	696	696	0	TraesCS1D01G144300	chr1D	199671814	199672590	Adenine nucleotide alpha hydrolases-like superfamily protein, putative
	TRINITY_DN6583_c0_g1	-10.7497	6.38e-07	9.94e-06	DOWN	TRINITY_DN6583_c0_g1	TraesCSU01G006700.1	105	318	318	2.18e-92	TraesCSU01G006700	chrUn	10303005	10303475	DNA double-strand break repair protein
	TRINITY_DN27347_c2_g1	-10.7488	8.59e-06	9.92e-05	DOWN	TRINITY_DN27347_c2_g1	TraesCS4A01G171300.1	1485	1719	1821	8.86e-98	TraesCS4A01G171300	chr4A	434075695	434077515	Pecanex-like protein 1
	TRINITY_DN16788_c0_g1	-10.7013	1.62e-11	6.61e-10	DOWN	TRINITY_DN16788_c0_g1	TraesCS2A01G295300.1	1	528	528	0	TraesCS2A01G295300	chr2A	507716632	507717159	Protein FANTASTIC FOUR 3
	TRINITY_DN25753_c0_g1	-10.683	2.1e-06	2.86e-05	DOWN	TRINITY_DN25753_c0_g1	TraesCS1D01G011400.1	2321	2635	2895	4.22e-127	TraesCS1D01G011400	chr1D	6264619	6268342	Leucine-rich repeat receptor-like protein kinase family
	TRINITY_DN33859_c1_g1	-10.6708	4.97e-09	1.26e-07	DOWN	TRINITY_DN33859_c1_g1	TraesCS2B01G055700.1	38	702	702	0	TraesCS2B01G055700	chr2B	27086113	27089102	Bidirectional sugar transporter SWEET
	TRINITY_DN19678_c0_g2	-10.6567	3.54e-10	1.13e-08	DOWN	TRINITY_DN19678_c0_g2	TraesCS6B01G187400.1	146	400	990	1.56e-130	TraesCS6B01G187400	chr6B	213487339	213488328	Nicotianamine synthase
	TRINITY_DN7787_c0_g1	-10.655	9.13e-06	0.000104652	DOWN	TRINITY_DN7787_c0_g1	TraesCS4D01G025800.1	587	822	822	1.97e-121	TraesCS4D01G025800	chr4D	11114586	11115707	Pollen allergen
	TRINITY_DN27330_c5_g1	-10.6416	2.66e-10	8.66e-09	DOWN	NA	NA	NA	NA	NA	NA	NA	NA	NA	NA	NA
	TRINITY_DN21161_c0_g2	-10.6406	5.22e-07	8.33e-06	DOWN	TRINITY_DN21161_c0_g2	TraesCS7D01G397900.1	1158	1248	1248	6.29e-41	TraesCS7D01G397900	chr7D	513311963	513313431	Pectin lyase-like superfamily protein, putative
	TRINITY_DN13733_c0_g1	-10.6309	1.83e-09	5.08e-08	DOWN	TRINITY_DN13733_c0_g1	TraesCS4B01G307100.1	1	777	777	0	TraesCS4B01G307100	chr4B	596397074	596397850	Late embryogenesis abundant hydroxyproline-rich glycoprotein, putative
	TRINITY_DN39154_c0_g1	-10.6224	1.08e-11	4.52e-10	DOWN	TRINITY_DN39154_c0_g1	TraesCS5A01G552000.1	178	756	1002	0	TraesCS5A01G552000	chr5A	705348536	705349537	Nicotianamine synthase
	TRINITY_DN41693_c0_g1	-10.6087	5.5e-06	6.72e-05	DOWN	TRINITY_DN41693_c0_g1	TraesCS7D01G215800.1	363	104	552	4.51e-116	TraesCS7D01G215800	chr7D	175666574	175667125	Ubiquitin-associated domain-containing protein 1
	TRINITY_DN80422_c0_g2	-10.6082	6.46e-06	7.73e-05	DOWN	NA	NA	NA	NA	NA	NA	NA	NA	NA	NA	NA
	TRINITY_DN13542_c0_g1	-10.6002	1.04e-07	1.99e-06	DOWN	TRINITY_DN13542_c0_g1	TraesCS5D01G560800.1	23	353	384	9.6e-161	TraesCS5D01G560800	chr5D	561690154	561690755	Flagellar motor switch protein FliM
	TRINITY_DN57768_c1_g1	-10.5924	3.83e-18	4.02e-16	DOWN	NA	NA	NA	NA	NA	NA	NA	NA	NA	NA	NA
	TRINITY_DN26451_c0_g1	-10.5874	3.22e-08	6.9e-07	DOWN	TRINITY_DN26451_c0_g1	TraesCS4A01G001100.1	2408	2679	2679	3.25e-141	TraesCS4A01G001100	chr4A	899048	901726	Receptor-like protein kinase
	TRINITY_DN12016_c0_g1	-10.5819	7.5e-13	3.83e-11	DOWN	TRINITY_DN12016_c0_g1	TraesCS5D01G335600.1	1000	1182	1182	6.69e-92	TraesCS5D01G335600	chr5D	424780098	424781358	Glucan endo-1,3-beta-glucosidase
	TRINITY_DN24799_c0_g1	-10.572	2.57e-06	3.4e-05	DOWN	NA	NA	NA	NA	NA	NA	NA	NA	NA	NA	NA
	TRINITY_DN168841_c0_g1	-10.5512	5.58e-10	1.71e-08	DOWN	NA	NA	NA	NA	NA	NA	NA	NA	NA	NA	NA
	TRINITY_DN42534_c0_g1	-10.535	1.07e-09	3.12e-08	DOWN	TRINITY_DN42534_c0_g1	TraesCS7A01G465200.1	1324	1386	1386	2.68e-25	TraesCS7A01G465200	chr7A	661589254	661595178	Aminotransferase
	TRINITY_DN241194_c0_g1	-10.4751	1.85e-11	7.47e-10	DOWN	TRINITY_DN241194_c0_g1	TraesCS1A01G150700.1	2924	2976	2976	3.6e-18	TraesCS1A01G150700	chr1A	258745539	258748892	Mammalian uncoordinated homology 13, domain 2
	TRINITY_DN48240_c0_g1	-10.4622	9.09e-06	0.000104327	DOWN	TRINITY_DN48240_c0_g1	TraesCS1D01G011400.1	1507	1853	2895	1.36e-108	TraesCS1D01G011400	chr1D	6264619	6268342	Leucine-rich repeat receptor-like protein kinase family
	TRINITY_DN2112_c1_g3	-10.4472	9.02e-06	0.000103569	DOWN	TRINITY_DN2112_c1_g3	TraesCS2B01G104000.1	963	1308	1446	0	TraesCS2B01G104000	chr2B	64856092	64857745	Pyruvate decarboxylase
	TRINITY_DN1255_c2_g1	-10.4303	1.09e-06	1.6e-05	DOWN	TRINITY_DN1255_c2_g1	TraesCS4B01G153800.1	580	1041	1041	0	TraesCS4B01G153800	chr4B	267669696	267670736	Hexosyltransferase
	TRINITY_DN20507_c0_g3	-10.423	9.63e-06	0.00010979	DOWN	TRINITY_DN20507_c0_g3	TraesCS5B01G124100.1	217	527	1134	7.55e-70	TraesCS5B01G124100	chr5B	223983433	223985799	Actin
	TRINITY_DN18677_c0_g1	-10.4075	1.23e-12	6.01e-11	DOWN	NA	NA	NA	NA	NA	NA	NA	NA	NA	NA	NA
	TRINITY_DN15964_c0_g1	-10.4048	3.48e-08	7.39e-07	DOWN	TRINITY_DN15964_c0_g1	TraesCS5D01G215700.1	1	649	1626	0	TraesCS5D01G215700	chr5D	324758624	324761414	CBS domain containing protein
	TRINITY_DN16864_c1_g1	-10.3661	2.04e-12	9.61e-11	DOWN	TRINITY_DN16864_c1_g1	TraesCS4A01G292300.1	1374	1588	2214	4.72e-110	TraesCS4A01G292300	chr4A	595192015	595194917	Endo-1,4-beta-xylanase, putative, expressed
	TRINITY_DN15491_c0_g1	-10.3429	7.96e-07	1.21e-05	DOWN	TRINITY_DN15491_c0_g1	TraesCS5B01G063100.1	917	957	957	4.48e-11	TraesCS5B01G063100	chr5B	70804455	70805868	F-box family protein
	TRINITY_DN18834_c0_g1	-10.3418	1.71e-07	3.11e-06	DOWN	TRINITY_DN18834_c0_g1	TraesCS4A01G436700.1	1	525	525	0	TraesCS4A01G436700	chr4A	706537515	706538039	Calcium-binding protein
	TRINITY_DN27631_c0_g1	-10.3336	4.16e-06	5.24e-05	DOWN	TRINITY_DN27631_c0_g1	TraesCS2D01G544800.1	546	806	1068	3.42e-132	TraesCS2D01G544800	chr2D	621615862	621635654	Cysteine protease
	TRINITY_DN2470_c0_g2	-10.3334	1.55e-08	3.55e-07	DOWN	TRINITY_DN2470_c0_g2	TraesCS6D01G183300.1	1	515	1530	0	TraesCS6D01G183300	chr6D	220293672	220296290	Rop guanine nucleotide exchange factor
	TRINITY_DN46212_c1_g1	-10.3322	6.97e-10	2.1e-08	DOWN	TRINITY_DN46212_c1_g1	TraesCS3D01G457700.1	462	181	1866	1.72e-140	TraesCS3D01G457700	chr3D	563417324	563419317	ENTH/ANTH/VHS superfamily protein
	TRINITY_DN5414_c0_g1	-10.3279	4.63e-18	4.79e-16	DOWN	TRINITY_DN5414_c0_g1	TraesCS2D01G061300.1	1	156	636	3.46e-72	TraesCS2D01G061300	chr2D	25318804	25319535	Proline-rich protein, putative, expressed
	TRINITY_DN4126_c1_g1	-10.3185	2.6e-08	5.66e-07	DOWN	TRINITY_DN4126_c1_g1	TraesCS4D01G001000.1	2133	2400	2673	2.08e-139	TraesCS4D01G001000	chr4D	628521	631193	Receptor-like protein kinase
	TRINITY_DN26764_c0_g1	-10.3166	4.85e-06	5.99e-05	DOWN	TRINITY_DN26764_c0_g1	TraesCS5D01G001000.1	1	405	510	0	TraesCS5D01G001000	chr5D	1533554	1534319	NADH-quinone oxidoreductase subunit D
	TRINITY_DN15332_c0_g1	-10.3151	1.91e-07	3.43e-06	DOWN	TRINITY_DN15332_c0_g1	TraesCS4A01G482300.1	1704	2025	2025	3.3e-159	TraesCS4A01G482300	chr4A	737535468	737538726	Tetratricopeptide repeat protein 7A
	TRINITY_DN24077_c2_g1	-10.2951	1.82e-07	3.29e-06	DOWN	TRINITY_DN24077_c2_g1	TraesCS5B01G411600.1	1547	1614	1614	2.74e-28	TraesCS5B01G411600	chr5B	586727062	586731553	MLO-like protein
	TRINITY_DN15234_c0_g1	-10.2526	4.53e-06	5.64e-05	DOWN	TRINITY_DN15234_c0_g1	TraesCS1D01G444300.1	1	1095	1095	0	TraesCS1D01G444300	chr1D	487633599	487635303	Kinase family protein
	TRINITY_DN88506_c0_g1	-10.2232	2.62e-06	3.45e-05	DOWN	TRINITY_DN88506_c0_g1	TraesCS4B01G391300.1	810	907	948	2.28e-37	TraesCS4B01G391300	chr4B	667201148	667210897	S-adenosyl-L-methionine-dependent methyltransferases superfamily protein
	TRINITY_DN161946_c0_g1	-10.2231	1.51e-07	2.78e-06	DOWN	NA	NA	NA	NA	NA	NA	NA	NA	NA	NA	NA
	TRINITY_DN16374_c0_g1	-10.2105	3.51e-17	3.26e-15	DOWN	TRINITY_DN16374_c0_g1	TraesCS3B01G393500.1	774	1168	1737	0	TraesCS3B01G393500	chr3B	618869342	618871881	Laccase
	TRINITY_DN26585_c0_g1	-10.2104	1.16e-08	2.74e-07	DOWN	TRINITY_DN26585_c0_g1	TraesCS5D01G460500.1	1	1806	1806	0	TraesCS5D01G460500	chr5D	504995212	504997382	Pectinesterase
	TRINITY_DN15666_c0_g2	-10.208	6.81e-08	1.36e-06	DOWN	TRINITY_DN15666_c0_g2	TraesCS7B01G165200.1	1	410	1734	0	TraesCS7B01G165200	chr7B	228362310	228364264	protein kinase family protein
	TRINITY_DN4829_c0_g2	-10.1692	1.2e-16	1.06e-14	DOWN	TRINITY_DN4829_c0_g2	TraesCS6B01G160200.1	133	1	999	5.56e-64	TraesCS6B01G160200	chr6B	164034011	164035009	glucuronoxylan 4-O-methyltransferase-like protein (DUF579)
	TRINITY_DN27225_c0_g1	-10.1665	1.18e-08	2.79e-07	DOWN	TRINITY_DN27225_c0_g1	TraesCS7D01G409400.1	158	424	1149	7.46e-139	TraesCS7D01G409400	chr7D	528078754	528080633	Kinase family protein
	TRINITY_DN21914_c0_g1	-10.1602	7.53e-17	6.77e-15	DOWN	TRINITY_DN21914_c0_g1	TraesCS1A01G283900.1	460	695	1746	1.11e-121	TraesCS1A01G283900	chr1A	481673552	481675855	Laccase
	TRINITY_DN22671_c0_g1	-10.1547	2.39e-06	3.19e-05	DOWN	TRINITY_DN22671_c0_g1	TraesCS2A01G088400.1	1301	1610	1803	1.12e-152	TraesCS2A01G088400	chr2A	41755618	41760397	Pyruvate decarboxylase
	TRINITY_DN88455_c0_g1	-10.1537	5.82e-08	1.18e-06	DOWN	TRINITY_DN88455_c0_g1	TraesCS1D01G390800.1	226	407	594	2.07e-91	TraesCS1D01G390800	chr1D	462105409	462107950	Cysteine protease
	TRINITY_DN15796_c0_g1	-10.1508	9.63e-07	1.43e-05	DOWN	TRINITY_DN15796_c0_g1	TraesCS5A01G157600.2	1	900	900	0	TraesCS5A01G157600	chr5A	337832683	337834723	Alpha/beta-Hydrolases superfamily protein
	TRINITY_DN23123_c0_g1	-10.1502	1.51e-07	2.78e-06	DOWN	TRINITY_DN23123_c0_g1	TraesCS4A01G171300.1	441	743	1821	6.77e-66	TraesCS4A01G171300	chr4A	434075695	434077515	Pecanex-like protein 1
	TRINITY_DN49344_c0_g1	-10.14	2.16e-15	1.61e-13	DOWN	NA	NA	NA	NA	NA	NA	NA	NA	NA	NA	NA
	TRINITY_DN432_c1_g1	-10.132	6.81e-06	8.11e-05	DOWN	TRINITY_DN432_c1_g1	TraesCS7D01G272000.1	998	1932	1932	0	TraesCS7D01G272000	chr7D	262024013	262025944	Armadillo repeat only
	TRINITY_DN20786_c0_g1	-10.1294	1.92e-06	2.63e-05	DOWN	TRINITY_DN20786_c0_g1	TraesCS4D01G150200.1	1	1508	2154	0	TraesCS4D01G150200	chr4D	166543875	166547237	Receptor kinase-like protein
	TRINITY_DN15078_c0_g1	-10.1197	3.24e-16	2.7e-14	DOWN	TRINITY_DN15078_c0_g1	TraesCS3B01G323500.1	846	1108	1935	2.66e-133	TraesCS3B01G323500	chr3B	523152884	523157006	Sulfate transporter, putative
	TRINITY_DN54646_c0_g1	-10.1032	3.58e-11	1.37e-09	DOWN	TRINITY_DN54646_c0_g1	TraesCS6D01G307500.1	1	130	330	3.8e-56	TraesCS6D01G307500	chr6D	418523867	418530951	Chaperone dnaJ-like protein
	TRINITY_DN20878_c0_g1	-10.0892	3.16e-06	4.09e-05	DOWN	TRINITY_DN20878_c0_g1	TraesCS3A01G538700.1	1	1974	1974	0	TraesCS3A01G538700	chr3A	749845133	749852672	SNARE-interacting protein KEULE
	TRINITY_DN40287_c0_g1	-10.0852	5.24e-15	3.71e-13	DOWN	TRINITY_DN40287_c0_g1	TraesCS1B01G383600.1	658	918	918	3.6e-117	TraesCS1B01G383600	chr1B	615581632	615582967	MYB transcription factor
	TRINITY_DN14629_c0_g1	-10.0787	8.62e-07	1.3e-05	DOWN	TRINITY_DN14629_c0_g1	TraesCS1B01G320400.1	1268	1554	1554	8.21e-148	TraesCS1B01G320400	chr1B	544725116	544727040	Calcium-dependent protein kinase
	TRINITY_DN13575_c0_g1	-10.0655	1.22e-06	1.77e-05	DOWN	TRINITY_DN13575_c0_g1	TraesCS2D01G523700.1	1616	1784	3054	4.85e-66	TraesCS2D01G523700	chr2D	612438156	612441574	Pectinesterase
	TRINITY_DN37967_c0_g1	-10.0625	7.89e-13	4e-11	DOWN	TRINITY_DN37967_c0_g1	TraesCS6D01G002500.1	2463	2684	2808	6.29e-114	TraesCS6D01G002500	chr6D	1508029	1517724	Protein kinase family protein
	TRINITY_DN39298_c0_g1	-10.0508	4.37e-09	1.12e-07	DOWN	TRINITY_DN39298_c0_g1	TraesCS1B01G292600.1	1609	1667	1740	2.39e-23	TraesCS1B01G292600	chr1B	509901155	509903088	Laccase
	TRINITY_DN19357_c0_g1	-10.05	3.03e-06	3.94e-05	DOWN	TRINITY_DN19357_c0_g1	TraesCS5D01G517400.1	1	279	279	9.14e-137	TraesCS5D01G517400	chr5D	539445500	539446142	Pentatricopeptide repeat (PPR) superfamily protein
	TRINITY_DN2041_c0_g1	-10.0305	9.84e-09	2.36e-07	DOWN	TRINITY_DN2041_c0_g1	TraesCS7D01G399000.1	616	1029	1245	0	TraesCS7D01G399000	chr7D	515236220	515237976	Pectin lyase-like superfamily protein, putative
	TRINITY_DN35002_c0_g1	-10.028	6.49e-07	1.01e-05	DOWN	TRINITY_DN35002_c0_g1	TraesCS2B01G573700.1	209	445	1056	3.1e-122	TraesCS2B01G573700	chr2B	763473911	763475309	Cysteine protease
	TRINITY_DN22190_c0_g1	-9.99802	3.05e-09	8.07e-08	DOWN	TRINITY_DN22190_c0_g1	TraesCS3A01G229800.1	1	1185	2163	0	TraesCS3A01G229800	chr3A	429615728	429618519	Receptor-like kinase
	TRINITY_DN42725_c0_g1	-9.99764	4.87e-09	1.24e-07	DOWN	TRINITY_DN42725_c0_g1	TraesCS6D01G370800.1	283	691	993	0	TraesCS6D01G370800	chr6D	456540534	456541526	Nicotianamine synthase
	TRINITY_DN34311_c0_g1	-9.98999	8.59e-14	5.06e-12	DOWN	TRINITY_DN34311_c0_g1	TraesCS3A01G180300.1	333	540	1002	3.54e-106	TraesCS3A01G180300	chr3A	208234220	208235870	Peroxidase
	TRINITY_DN20930_c0_g2	-9.97669	1.2e-07	2.26e-06	DOWN	TRINITY_DN20930_c0_g2	TraesCS6B01G128200.1	1630	1764	2064	2.52e-65	TraesCS6B01G128200	chr6B	123829848	123836320	Esterase/lipase/thioesterase-like protein
	TRINITY_DN26138_c0_g1	-9.96423	2.75e-06	3.61e-05	DOWN	TRINITY_DN26138_c0_g1	TraesCS3B01G011200.1	738	2748	2910	0	TraesCS3B01G011200	chr3B	5134306	5140959	Phosphoenolpyruvate carboxylase
	TRINITY_DN30822_c0_g1	-9.96275	1.47e-14	9.81e-13	DOWN	TRINITY_DN30822_c0_g1	TraesCS7D01G019900.1	519	752	1500	1.51e-110	TraesCS7D01G019900	chr7D	8559750	8561421	Cytochrome P450 family protein, expressed
	TRINITY_DN53005_c0_g1	-9.96125	2.25e-14	1.46e-12	DOWN	TRINITY_DN53005_c0_g1	TraesCS2B01G558400.1	188	231	1197	7.19e-15	TraesCS2B01G558400	chr2B	752785199	752787787	Chalcone synthase
	TRINITY_DN22172_c0_g1	-9.95765	4.84e-06	5.97e-05	DOWN	TRINITY_DN22172_c0_g1	TraesCS6B01G254300.1	993	1359	1359	0	TraesCS6B01G254300	chr6B	457309730	457311188	Lung seven transmembrane receptor, putative
	TRINITY_DN172528_c0_g1	-9.94842	8.57e-09	2.08e-07	DOWN	NA	NA	NA	NA	NA	NA	NA	NA	NA	NA	NA
	TRINITY_DN25670_c0_g1	-9.93205	4.72e-06	5.84e-05	DOWN	TRINITY_DN25670_c0_g1	TraesCS1D01G451600.1	1	363	849	5.54e-177	TraesCS1D01G451600	chr1D	493702744	493703694	Carbonic anhydrase
	TRINITY_DN1608_c1_g1	-9.92785	1.7e-08	3.86e-07	DOWN	TRINITY_DN1608_c1_g1	TraesCS7A01G404700.1	888	1180	1263	6.43e-135	TraesCS7A01G404700	chr7A	586692224	586693688	Pectin lyase-like superfamily protein, putative
	TRINITY_DN2301_c0_g2	-9.927	2.07e-14	1.35e-12	DOWN	TRINITY_DN2301_c0_g2	TraesCS2D01G358200.1	1365	1119	1365	9.26e-128	TraesCS2D01G358200	chr2D	460364946	460366310	Leucine-rich repeat protein kinase family protein
	TRINITY_DN24273_c0_g1	-9.9225	2.43e-07	4.24e-06	DOWN	TRINITY_DN24273_c0_g1	TraesCS4B01G149500.1	1903	2157	2157	4.44e-130	TraesCS4B01G149500	chr4B	222559370	222563059	Receptor kinase-like protein
	TRINITY_DN62809_c0_g2	-9.91427	3.24e-12	1.48e-10	DOWN	TRINITY_DN62809_c0_g2	TraesCS2A01G108100.1	502	789	951	8.05e-144	TraesCS2A01G108100	chr2A	60078174	60079424	Peroxidase
	TRINITY_DN20051_c0_g1	-9.91349	8.17e-08	1.6e-06	DOWN	TRINITY_DN20051_c0_g1	TraesCS1B01G409100.1	246	621	822	6.35e-151	TraesCS1B01G409100	chr1B	636725798	636726971	Cysteine protease
	TRINITY_DN67493_c0_g2	-9.91171	2.27e-08	5.02e-07	DOWN	NA	NA	NA	NA	NA	NA	NA	NA	NA	NA	NA
	TRINITY_DN63558_c0_g1	-9.91111	1.53e-14	1.02e-12	DOWN	TRINITY_DN63558_c0_g1	TraesCS2A01G025500.1	338	800	1185	0	TraesCS2A01G025500	chr2A	12047311	12048592	Chalcone synthase
	TRINITY_DN4750_c1_g1	-9.90149	1.87e-07	3.37e-06	DOWN	TRINITY_DN4750_c1_g1	TraesCS6B01G416000.1	1	108	528	1.93e-35	TraesCS6B01G416000	chr6B	688372234	688373132	Crib domain-containing protein ric6
	TRINITY_DN94752_c0_g2	-9.8877	9.69e-15	6.62e-13	DOWN	TRINITY_DN94752_c0_g2	TraesCS1A01G034900.1	977	1240	1494	1.59e-135	TraesCS1A01G034900	chr1A	18084403	18086010	Cytochrome P450, putative
	TRINITY_DN72638_c0_g1	-9.88512	3.92e-08	8.24e-07	DOWN	TRINITY_DN72638_c0_g1	TraesCS1B01G056100.1	1	501	501	0	TraesCS1B01G056100	chr1B	39234325	39234825	NAD(P)H-quinone oxidoreductase subunit M, chloroplastic
	TRINITY_DN201273_c0_g1	-9.88307	5.51e-06	6.73e-05	DOWN	TRINITY_DN201273_c0_g1	TraesCS2B01G607800.1	1	360	360	0	TraesCS2B01G607800	chr2B	788121895	788122483	Beta-expansin
	TRINITY_DN12264_c0_g3	-9.88303	5.91e-07	9.29e-06	DOWN	TRINITY_DN12264_c0_g3	TraesCS1A01G291100.1	1330	1380	1380	8.4e-19	TraesCS1A01G291100	chr1A	487330631	487333866	Aminotransferase-related family protein
	TRINITY_DN29197_c0_g1	-9.87069	4.99e-07	8e-06	DOWN	TRINITY_DN29197_c0_g1	TraesCS3B01G171800.1	1	340	429	1.69e-154	TraesCS3B01G171800	chr3B	172768854	172769441	Transcriptional factor B3 family protein
	TRINITY_DN17708_c1_g2	-9.86202	2.38e-08	5.24e-07	DOWN	TRINITY_DN17708_c1_g2	TraesCS5A01G138300.1	465	679	1626	4.72e-110	TraesCS5A01G138300	chr5A	310872901	310875109	Calcium-dependent protein kinase
	TRINITY_DN16792_c1_g2	-9.83616	1.47e-14	9.81e-13	DOWN	TRINITY_DN16792_c1_g2	TraesCS1D01G286800.1	116	909	1308	0	TraesCS1D01G286800	chr1D	384977101	384978998	Kinase family protein
	TRINITY_DN113633_c0_g3	-9.80681	5.8e-12	2.54e-10	DOWN	NA	NA	NA	NA	NA	NA	NA	NA	NA	NA	NA
	TRINITY_DN32693_c0_g1	-9.80081	5.57e-07	8.82e-06	DOWN	TRINITY_DN32693_c0_g1	TraesCS6B01G047100.1	48	256	1047	4.63e-105	TraesCS6B01G047100	chr6B	27919395	27920441	2-oxoglutarate (2OG) and Fe(II)-dependent oxygenase superfamily protein
	TRINITY_DN3623_c1_g2	-9.79665	1.26e-13	7.25e-12	DOWN	TRINITY_DN3623_c1_g2	TraesCS2D01G545700.1	1663	1881	2604	8e-103	TraesCS2D01G545700	chr2D	622348855	622363820	Cyclopropane-fatty-acyl-phospholipid synthase
	TRINITY_DN21612_c0_g1	-9.78449	2.84e-07	4.86e-06	DOWN	TRINITY_DN21612_c0_g1	TraesCS7A01G155300.1	1	479	867	0	TraesCS7A01G155300	chr7A	108440674	108442491	U-box domain-containing protein kinase family protein
	TRINITY_DN21269_c0_g1	-9.77785	6.99e-11	2.54e-09	DOWN	TRINITY_DN21269_c0_g1	TraesCS5A01G332300.1	742	840	876	7.54e-44	TraesCS5A01G332300	chr5A	540681612	540682662	Aquaporin-like protein
	TRINITY_DN238576_c0_g1	-9.7762	1.19e-08	2.8e-07	DOWN	NA	NA	NA	NA	NA	NA	NA	NA	NA	NA	NA
	TRINITY_DN48471_c1_g1	-9.75545	3.03e-10	9.75e-09	DOWN	TRINITY_DN48471_c1_g1	TraesCS4A01G463600.1	1195	945	1572	2.89e-128	TraesCS4A01G463600	chr4A	727268827	727270724	Cytochrome P450
	TRINITY_DN48972_c2_g1	-9.74236	4.73e-13	2.51e-11	DOWN	TRINITY_DN48972_c2_g1	TraesCS7D01G155500.1	888	687	2421	7.41e-103	TraesCS7D01G155500	chr7D	104090320	104092836	Kinase
	TRINITY_DN13447_c2_g1	-9.73507	3.24e-07	5.47e-06	DOWN	TRINITY_DN13447_c2_g1	TraesCS7D01G519500.1	1	233	465	6.3e-120	TraesCS7D01G519500	chr7D	617511444	617512055	Histone H2A
	TRINITY_DN65571_c0_g1	-9.72885	1.31e-07	2.44e-06	DOWN	TRINITY_DN65571_c0_g1	TraesCS3D01G475100.1	1	107	996	1.08e-46	TraesCS3D01G475100	chr3D	575739448	575740858	Beta-1,3-glucanase
	TRINITY_DN633_c0_g2	-9.72314	1.18e-08	2.78e-07	DOWN	TRINITY_DN633_c0_g2	TraesCS5B01G297700.1	466	695	1659	2.34e-118	TraesCS5B01G297700	chr5B	480292001	480294845	protein kinase family protein
	TRINITY_DN37286_c0_g3	-9.72006	5.4e-11	2e-09	DOWN	TRINITY_DN37286_c0_g3	TraesCS1D01G001500.1	1240	1454	3171	5.15e-60	TraesCS1D01G001500	chr1D	392359	395615	Receptor protein kinase, putative
	TRINITY_DN19798_c0_g1	-9.71724	1.48e-08	3.41e-07	DOWN	TRINITY_DN19798_c0_g1	TraesCS1D01G224200.1	1	696	696	0	TraesCS1D01G224200	chr1D	312666373	312667068	Glutaredoxin family protein
	TRINITY_DN53246_c0_g1	-9.70868	1.42e-06	2.02e-05	DOWN	TRINITY_DN53246_c0_g1	TraesCSU01G182900.1	17	1421	2094	0	TraesCSU01G182900	chrUn	276526691	276530298	Potassium channel
	TRINITY_DN20225_c3_g1	-9.70656	1.96e-08	4.39e-07	DOWN	NA	NA	NA	NA	NA	NA	NA	NA	NA	NA	NA
	TRINITY_DN47521_c0_g1	-9.69387	3.97e-06	5.02e-05	DOWN	TRINITY_DN47521_c0_g1	TraesCS2B01G072800.1	287	816	1134	0	TraesCS2B01G072800	chr2B	39092908	39094335	Cysteine protease
	TRINITY_DN39842_c0_g1	-9.6935	1.71e-08	3.87e-07	DOWN	NA	NA	NA	NA	NA	NA	NA	NA	NA	NA	NA
	TRINITY_DN22775_c0_g1	-9.69163	2.11e-06	2.86e-05	DOWN	TRINITY_DN22775_c0_g1	TraesCS3B01G255100.1	1	546	546	0	TraesCS3B01G255100	chr3B	411452180	411452820	Late embryogenesis abundant protein Lea14
	TRINITY_DN42003_c0_g1	-9.69079	2.38e-09	6.44e-08	DOWN	TRINITY_DN42003_c0_g1	TraesCS7A01G557900.1	84	204	1017	1.36e-57	TraesCS7A01G557900	chr7A	730504554	730505570	'putative beta-1,3-glucanase
	TRINITY_DN13968_c0_g1	-9.68653	2.11e-06	2.86e-05	DOWN	TRINITY_DN13968_c0_g1	TraesCSU01G106900.1	1	3186	3186	0	TraesCSU01G106900	chrUn	93448334	93454549	ABC transporter G family member
	TRINITY_DN4230_c0_g1	-9.67879	2.88e-07	4.93e-06	DOWN	TRINITY_DN4230_c0_g1	TraesCS3B01G202700.1	1	525	525	0	TraesCS3B01G202700	chr3B	237098144	237098668	Pectinesterase inhibitor
	TRINITY_DN564_c1_g1	-9.67003	7.14e-08	1.41e-06	DOWN	TRINITY_DN564_c1_g1	TraesCS5A01G511000.1	594	1263	1263	0	TraesCS5A01G511000	chr5A	674543878	674545262	Phospholipase A1
	TRINITY_DN14827_c0_g1	-9.66849	3.6e-07	6.01e-06	DOWN	TRINITY_DN14827_c0_g1	TraesCS3D01G295900.1	1375	1434	1434	3.72e-18	TraesCS3D01G295900	chr3D	409011171	409012703	Non-specific serine/threonine protein kinase
	TRINITY_DN25697_c0_g1	-9.6662	1.8e-07	3.25e-06	DOWN	TRINITY_DN25697_c0_g1	TraesCS7A01G465200.1	1043	1244	1386	7.45e-103	TraesCS7A01G465200	chr7A	661589254	661595178	Aminotransferase
	TRINITY_DN6548_c0_g1	-9.65357	4.73e-10	1.47e-08	DOWN	TRINITY_DN6548_c0_g1	TraesCS5A01G158700.1	1	333	333	4.92e-170	TraesCS5A01G158700	chr5A	338558328	338558971	Alcohol oxidase 2
	TRINITY_DN34251_c0_g1	-9.6412	4.72e-06	5.85e-05	DOWN	TRINITY_DN34251_c0_g1	TraesCS7A01G568600.1	1	291	291	5.49e-137	TraesCS7A01G568600	chr7A	736417967	736418257	N-lysine methyltransferase
	TRINITY_DN62324_c1_g2	-9.63314	8.18e-13	4.13e-11	DOWN	NA	NA	NA	NA	NA	NA	NA	NA	NA	NA	NA
	TRINITY_DN88120_c0_g1	-9.61687	5.63e-13	2.95e-11	DOWN	TRINITY_DN88120_c0_g1	TraesCS2A01G445500.1	213	271	1104	2.58e-23	TraesCS2A01G445500	chr2A	695150181	695151471	MYB protein
	TRINITY_DN28704_c0_g1	-9.61334	1.72e-12	8.24e-11	DOWN	TRINITY_DN28704_c0_g1	TraesCS2B01G466500.1	996	1086	1086	2.01e-39	TraesCS2B01G466500	chr2B	662373014	662374783	MYB protein
	TRINITY_DN42302_c0_g1	-9.60633	1.62e-12	7.81e-11	DOWN	TRINITY_DN42302_c0_g1	TraesCS1D01G073300.1	1035	1292	1848	1.58e-125	TraesCS1D01G073300	chr1D	54337651	54340423	transcription factor, putative (Protein of unknown function, DUF547)
	TRINITY_DN55791_c0_g1	-9.5786	6.85e-10	2.07e-08	DOWN	TRINITY_DN55791_c0_g1	TraesCS7B01G052700.3	873	932	1014	8.05e-24	TraesCS7B01G052700	chr7B	55065321	55067137	Cinnamoyl-CoA reductase
	TRINITY_DN3127_c1_g1	-9.57602	1.87e-17	1.81e-15	DOWN	TRINITY_DN3127_c1_g1	TraesCS6A01G121200.1	1	1107	1107	0	TraesCS6A01G121200	chr6A	93631415	93633079	Plant calmodulin-binding protein-like protein
	TRINITY_DN84209_c0_g1	-9.57516	1.94e-06	2.66e-05	DOWN	NA	NA	NA	NA	NA	NA	NA	NA	NA	NA	NA
	TRINITY_DN121493_c0_g1	-9.57232	3.24e-07	5.48e-06	DOWN	TRINITY_DN121493_c0_g1	TraesCS5B01G081500.1	1803	1579	2034	1.38e-115	TraesCS5B01G081500	chr5B	102161878	102164323	Kinase superfamily protein
	TRINITY_DN76600_c0_g1	-9.57105	4.64e-06	5.76e-05	DOWN	TRINITY_DN76600_c0_g1	TraesCS7A01G458700.1	277	318	1215	6.55e-14	TraesCS7A01G458700	chr7A	653589482	653593545	MYB-related transcription factor
	TRINITY_DN210726_c0_g1	-9.56351	1.03e-12	5.09e-11	DOWN	NA	NA	NA	NA	NA	NA	NA	NA	NA	NA	NA
	TRINITY_DN17695_c1_g1	-9.55461	4e-07	6.59e-06	DOWN	TRINITY_DN17695_c1_g1	TraesCS6A01G122100.1	675	470	1590	4.61e-105	TraesCS6A01G122100	chr6A	94226922	94231112	Endoglucanase
	TRINITY_DN38846_c0_g1	-9.55437	4.62e-06	5.73e-05	DOWN	TRINITY_DN38846_c0_g1	TraesCS2B01G072800.1	716	979	1134	2.26e-116	TraesCS2B01G072800	chr2B	39092908	39094335	Cysteine protease
	TRINITY_DN28984_c0_g1	-9.55239	5.59e-09	1.4e-07	DOWN	TRINITY_DN28984_c0_g1	TraesCS2D01G317900.1	1	96	1695	6.56e-44	TraesCS2D01G317900	chr2D	407225713	407227411	Pectinesterase
	TRINITY_DN88717_c0_g1	-9.54078	1.64e-12	7.88e-11	DOWN	TRINITY_DN88717_c0_g1	TraesCS3B01G610600.2	682	754	954	4.02e-31	TraesCS3B01G610600	chr3B	829037444	829040352	Pectin acetylesterase
	TRINITY_DN15592_c0_g2	-9.54019	3.06e-08	6.58e-07	DOWN	TRINITY_DN15592_c0_g2	TraesCS7A01G005300.1	646	879	4140	7.59e-69	TraesCS7A01G005300	chr7A	2742421	2746858	Receptor protein kinase, putative
	TRINITY_DN4237_c0_g1	-9.53537	6.25e-16	4.99e-14	DOWN	TRINITY_DN4237_c0_g1	TraesCS1D01G253300.1	1	357	357	0	TraesCS1D01G253300	chr1D	345414661	345416643	proline-rich nuclear receptor coactivator
	TRINITY_DN26299_c1_g1	-9.53485	8.6e-11	3.07e-09	DOWN	TRINITY_DN26299_c1_g1	TraesCS5A01G226700.1	1251	1489	1563	1.13e-121	TraesCS5A01G226700	chr5A	442504523	442509175	Sugar transporter, putative
	TRINITY_DN2445_c0_g1	-9.52625	5.76e-05	0.000549387	DOWN	TRINITY_DN2445_c0_g1	TraesCS7D01G356700.1	840	1335	1335	0	TraesCS7D01G356700	chr7D	459872323	459873744	Pectate lyase
	TRINITY_DN47330_c0_g1	-9.5219	2.02e-08	4.51e-07	DOWN	TRINITY_DN47330_c0_g1	TraesCS2D01G538600.1	422	631	966	6.09e-104	TraesCS2D01G538600	chr2D	619598474	619599439	Sulfotransferase
	TRINITY_DN93375_c0_g1	-9.51575	2.3e-09	6.25e-08	DOWN	NA	NA	NA	NA	NA	NA	NA	NA	NA	NA	NA
	TRINITY_DN9267_c0_g2	-9.50998	3.64e-06	4.63e-05	DOWN	TRINITY_DN9267_c0_g2	TraesCS4D01G001000.1	64	1821	2673	0	TraesCS4D01G001000	chr4D	628521	631193	Receptor-like protein kinase
	TRINITY_DN71968_c0_g1	-9.49993	3.31e-09	8.7e-08	DOWN	NA	NA	NA	NA	NA	NA	NA	NA	NA	NA	NA
	TRINITY_DN57694_c0_g1	-9.49415	6.46e-12	2.82e-10	DOWN	TRINITY_DN57694_c0_g1	TraesCS6A01G263200.1	506	558	558	8.21e-20	TraesCS6A01G263200	chr6A	486353050	486353607	50S ribosomal protein L18
	TRINITY_DN18349_c0_g3	-9.48913	1.81e-07	3.28e-06	DOWN	TRINITY_DN18349_c0_g3	TraesCS6A01G421000.1	216	420	1686	1.64e-94	TraesCS6A01G421000	chr6A	617656899	617658717	Calcium-dependent protein kinase
	TRINITY_DN26726_c0_g1	-9.47612	1.01e-10	3.57e-09	DOWN	TRINITY_DN26726_c0_g1	TraesCS1A01G034900.1	1	368	1494	0	TraesCS1A01G034900	chr1A	18084403	18086010	Cytochrome P450, putative
	TRINITY_DN28584_c0_g1	-9.47537	1.81e-08	4.1e-07	DOWN	TRINITY_DN28584_c0_g1	TraesCS2B01G529100.1	343	594	594	9.54e-127	TraesCS2B01G529100	chr2B	723446610	723447203	RING/U-box superfamily protein, putative
	TRINITY_DN91206_c0_g1	-9.46613	5e-12	2.22e-10	DOWN	TRINITY_DN91206_c0_g1	TraesCS7D01G375700.1	1449	1504	1512	1.19e-21	TraesCS7D01G375700	chr7D	486057132	486062283	Polyamine oxidase
	TRINITY_DN99861_c0_g1	-9.45991	5.28e-12	2.33e-10	DOWN	TRINITY_DN99861_c0_g1	TraesCS6A01G121200.1	1107	889	1107	3e-112	TraesCS6A01G121200	chr6A	93631415	93633079	Plant calmodulin-binding protein-like protein
	TRINITY_DN53877_c0_g1	-9.45892	5.66e-11	2.09e-09	DOWN	TRINITY_DN53877_c0_g1	TraesCS3B01G327800.1	1	237	237	1.14e-121	TraesCS3B01G327800	chr3B	528492573	528493278	Clavata3/ESR (CLE) gene family member
	TRINITY_DN38028_c2_g1	-9.44018	1.18e-11	4.9e-10	DOWN	NA	NA	NA	NA	NA	NA	NA	NA	NA	NA	NA
	TRINITY_DN104357_c0_g1	-9.42971	1.16e-07	2.2e-06	DOWN	NA	NA	NA	NA	NA	NA	NA	NA	NA	NA	NA
	TRINITY_DN57244_c0_g1	-9.42599	3.47e-07	5.82e-06	DOWN	TRINITY_DN57244_c0_g1	TraesCS1B01G321500.1	628	837	1170	2.77e-107	TraesCS1B01G321500	chr1B	545461289	545462860	WAT1-related protein
	TRINITY_DN22548_c4_g1	-9.41952	4.16e-08	8.71e-07	DOWN	NA	NA	NA	NA	NA	NA	NA	NA	NA	NA	NA
	TRINITY_DN21159_c0_g1	-9.41345	4.49e-06	5.59e-05	DOWN	TRINITY_DN21159_c0_g1	TraesCS4B01G127200.1	1089	1442	1995	1.2e-178	TraesCS4B01G127200	chr4B	166556620	166559932	Plant invertase/pectin methylesterase inhibitor superfamily protein
	TRINITY_DN20842_c0_g1	-9.40476	1.58e-07	2.91e-06	DOWN	TRINITY_DN20842_c0_g1	TraesCS3A01G141000.1	1	234	234	3.38e-120	TraesCS3A01G141000	chr3A	120227582	120228113	RALF
	TRINITY_DN119982_c0_g1	-9.40408	7.08e-07	1.09e-05	DOWN	TRINITY_DN119982_c0_g1	TraesCS1B01G409200.1	1	511	1119	0	TraesCS1B01G409200	chr1B	636737982	636739203	Cysteine protease
	TRINITY_DN42676_c0_g1	-9.40337	2.84e-06	3.71e-05	DOWN	TRINITY_DN42676_c0_g1	TraesCSU01G035000.1	709	789	789	5.62e-27	TraesCSU01G035000	chrUn	30136993	30137781	non-intrinsic ABC protein 12
	TRINITY_DN2671_c0_g3	-9.40132	3.39e-07	5.71e-06	DOWN	TRINITY_DN2671_c0_g3	TraesCS1A01G037800.1	1669	1907	2145	5.24e-120	TraesCS1A01G037800	chr1A	20935410	20937908	Phenylalanine ammonia-lyase
	TRINITY_DN90650_c0_g1	-9.40096	3.99e-08	8.39e-07	DOWN	TRINITY_DN90650_c0_g1	TraesCS1B01G168300.1	2641	2903	2925	5.73e-135	TraesCS1B01G168300	chr1B	297731613	297734896	Mammalian uncoordinated homology 13, domain 2
	TRINITY_DN117241_c1_g1	-9.39805	4.43e-08	9.22e-07	DOWN	TRINITY_DN117241_c1_g1	TraesCS3B01G024000.1	342	574	1890	5.1e-120	TraesCS3B01G024000	chr3B	10248941	10251406	Glycosyltransferase
	TRINITY_DN23524_c0_g1	-9.39455	1.95e-06	2.67e-05	DOWN	TRINITY_DN23524_c0_g1	TraesCS1A01G291100.1	395	599	1380	1.63e-99	TraesCS1A01G291100	chr1A	487330631	487333866	Aminotransferase-related family protein
	TRINITY_DN82957_c1_g1	-9.38666	8e-10	2.38e-08	DOWN	TRINITY_DN82957_c1_g1	TraesCS6D01G143700.1	1538	1764	1764	1.43e-116	TraesCS6D01G143700	chr6D	114228928	114232897	ENTH/ANTH/VHS superfamily protein
	TRINITY_DN36036_c0_g2	-9.38227	5.59e-08	1.14e-06	DOWN	TRINITY_DN36036_c0_g2	TraesCS7D01G475300.1	1312	1371	1371	5.33e-22	TraesCS7D01G475300	chr7D	587301950	587303405	Aspartic proteinase nepenthesin-2
	TRINITY_DN26336_c0_g2	-9.37903	6.78e-07	1.05e-05	DOWN	TRINITY_DN26336_c0_g2	TraesCS4A01G001100.1	1992	2207	2679	1.32e-110	TraesCS4A01G001100	chr4A	899048	901726	Receptor-like protein kinase
	TRINITY_DN41553_c0_g1	-9.37815	2.24e-08	4.96e-07	DOWN	TRINITY_DN41553_c0_g1	TraesCS2B01G224000.1	1511	1734	2124	2.28e-113	TraesCS2B01G224000	chr2B	214281145	214283268	Phenylalanine ammonia-lyase
	TRINITY_DN12393_c0_g1	-9.36607	1.99e-05	0.000209338	DOWN	TRINITY_DN12393_c0_g1	TraesCS3B01G311200.1	1	343	396	3.42e-174	TraesCS3B01G311200	chr3B	499805533	499806128	Profilin
	TRINITY_DN15289_c1_g1	-9.36276	3.73e-07	6.2e-06	DOWN	NA	NA	NA	NA	NA	NA	NA	NA	NA	NA	NA
	TRINITY_DN34893_c0_g1	-9.36183	1.17e-07	2.21e-06	DOWN	TRINITY_DN34893_c0_g1	TraesCS2B01G001100.1	1439	1528	1536	1.92e-35	TraesCS2B01G001100	chr2B	477214	478749	Cytochrome P450 family protein, expressed
	TRINITY_DN18413_c0_g1	-9.3594	2.94e-10	9.5e-09	DOWN	NA	NA	NA	NA	NA	NA	NA	NA	NA	NA	NA
	TRINITY_DN33783_c0_g1	-9.35781	1.6e-09	4.49e-08	DOWN	NA	NA	NA	NA	NA	NA	NA	NA	NA	NA	NA
	TRINITY_DN21376_c0_g1	-9.35161	3.44e-06	4.41e-05	DOWN	TRINITY_DN21376_c0_g1	TraesCS4D01G001000.1	1681	2113	2673	0	TraesCS4D01G001000	chr4D	628521	631193	Receptor-like protein kinase
	TRINITY_DN34867_c0_g1	-9.34396	4.34e-06	5.43e-05	DOWN	TRINITY_DN34867_c0_g1	TraesCS2A01G411600.1	1	381	381	0	TraesCS2A01G411600	chr2A	669567532	669567912	14 kDa proline-rich protein DC2.15
	TRINITY_DN25398_c1_g1	-9.34342	3.83e-11	1.46e-09	DOWN	TRINITY_DN25398_c1_g1	TraesCS3D01G446200.1	2450	2676	4287	1.07e-116	TraesCS3D01G446200	chr3D	554955839	554960391	NBS-LRR disease resistance protein-like protein
	TRINITY_DN60888_c0_g1	-9.33527	3.46e-11	1.33e-09	DOWN	TRINITY_DN60888_c0_g1	TraesCS4B01G346100.1	894	937	939	7.14e-15	TraesCS4B01G346100	chr4B	639847459	639852066	Homeobox protein knotted-1, putative
	TRINITY_DN36792_c0_g2	-9.33349	2.95e-10	9.52e-09	DOWN	TRINITY_DN36792_c0_g2	TraesCS7D01G065700.1	1	270	270	1.71e-133	TraesCS7D01G065700	chr7D	36451433	36452078	Avr9/Cf-9 rapidly elicited protein
	TRINITY_DN37542_c0_g1	-9.32806	2.17e-06	2.93e-05	DOWN	TRINITY_DN37542_c0_g1	TraesCS2D01G061000.1	46	280	636	8.77e-108	TraesCS2D01G061000	chr2D	25184314	25184949	Proline-rich protein, putative, expressed
	TRINITY_DN27192_c0_g1	-9.32544	2.63e-08	5.74e-07	DOWN	TRINITY_DN27192_c0_g1	TraesCS3B01G323500.1	1414	1573	1935	5.53e-76	TraesCS3B01G323500	chr3B	523152884	523157006	Sulfate transporter, putative
	TRINITY_DN37640_c0_g1	-9.32263	5.17e-11	1.93e-09	DOWN	NA	NA	NA	NA	NA	NA	NA	NA	NA	NA	NA
	TRINITY_DN58916_c1_g1	-9.3152	3.25e-09	8.55e-08	DOWN	TRINITY_DN58916_c1_g1	TraesCS2B01G165700.1	232	433	924	7.52e-93	TraesCS2B01G165700	chr2B	137855149	137856391	Basic-leucine zipper (BZIP) transcription factor family protein, putative
	TRINITY_DN15065_c0_g2	-9.30311	2.43e-09	6.55e-08	DOWN	NA	NA	NA	NA	NA	NA	NA	NA	NA	NA	NA
	TRINITY_DN65208_c0_g1	-9.298	8.08e-07	1.22e-05	DOWN	TRINITY_DN65208_c0_g1	TraesCS1A01G291100.1	561	1070	1380	0	TraesCS1A01G291100	chr1A	487330631	487333866	Aminotransferase-related family protein
	TRINITY_DN49293_c0_g2	-9.29447	6.27e-07	9.79e-06	DOWN	TRINITY_DN49293_c0_g2	TraesCS5D01G153800.1	128	344	1626	7.98e-108	TraesCS5D01G153800	chr5D	242356621	242358826	Calcium-dependent protein kinase
	TRINITY_DN52308_c0_g2	-9.29435	6.21e-10	1.89e-08	DOWN	TRINITY_DN52308_c0_g2	TraesCS7A01G005300.1	1	212	4140	1.64e-75	TraesCS7A01G005300	chr7A	2742421	2746858	Receptor protein kinase, putative
	TRINITY_DN74711_c0_g2	-9.29361	2.1e-09	5.75e-08	DOWN	TRINITY_DN74711_c0_g2	TraesCS5A01G547600.1	223	28	570	5.02e-25	TraesCS5A01G547600	chr5A	701907344	701907913	B3 domain-containing protein REM13
	TRINITY_DN44992_c0_g1	-9.27809	6.61e-09	1.64e-07	DOWN	NA	NA	NA	NA	NA	NA	NA	NA	NA	NA	NA
	TRINITY_DN12675_c0_g1	-9.25488	8.44e-13	4.25e-11	DOWN	TRINITY_DN12675_c0_g1	TraesCS5B01G171000.1	1	438	438	0	TraesCS5B01G171000	chr5B	315891695	315894458	Mitochondrial import inner membrane translocase subunit Tim22
	TRINITY_DN34452_c0_g1	-9.23835	2.47e-09	6.65e-08	DOWN	NA	NA	NA	NA	NA	NA	NA	NA	NA	NA	NA
	TRINITY_DN2211_c1_g1	-9.23677	1.8e-10	6.05e-09	DOWN	TRINITY_DN2211_c1_g1	TraesCS2A01G062600.1	587	357	645	3.93e-106	TraesCS2A01G062600	chr2A	27742401	27743379	Proline-rich protein
	TRINITY_DN9638_c0_g1	-9.23267	5.2e-07	8.3e-06	DOWN	TRINITY_DN9638_c0_g1	TraesCS1D01G125700.1	1	546	546	0	TraesCS1D01G125700	chr1D	135394942	135395487	Pectinesterase inhibitor
	TRINITY_DN59387_c0_g1	-9.23049	2.14e-08	4.75e-07	DOWN	TRINITY_DN59387_c0_g1	TraesCS5D01G046400.1	548	810	810	5.61e-133	TraesCS5D01G046400	chr5D	45205928	45209406	Bidirectional sugar transporter SWEET
	TRINITY_DN57551_c1_g1	-9.22844	5.11e-10	1.58e-08	DOWN	TRINITY_DN57551_c1_g1	TraesCS5A01G087100.1	33	269	837	3.1e-122	TraesCS5A01G087100	chr5A	116033249	116034883	MYB transcription factor
	TRINITY_DN217096_c0_g1	-9.22716	4.59e-07	7.43e-06	DOWN	TRINITY_DN217096_c0_g1	TraesCS6A01G192900.1	145	1	1452	5.29e-71	TraesCS6A01G192900	chr6A	264830875	264834344	Kinase superfamily protein
	TRINITY_DN50216_c0_g1	-9.22511	1.09e-09	3.16e-08	DOWN	NA	NA	NA	NA	NA	NA	NA	NA	NA	NA	NA
	TRINITY_DN24985_c0_g1	-9.22387	9e-10	2.65e-08	DOWN	TRINITY_DN24985_c0_g1	TraesCS2B01G174900.1	751	888	888	3.89e-67	TraesCS2B01G174900	chr2B	150140967	150142005	Glycine rich protein 3
	TRINITY_DN3285_c0_g3	-9.21441	7.62e-09	1.87e-07	DOWN	TRINITY_DN3285_c0_g3	TraesCS6B01G166200.1	1	270	978	6.92e-137	TraesCS6B01G166200	chr6B	173391680	173393524	Peroxidase
	TRINITY_DN58906_c0_g2	-9.21227	2.06e-06	2.81e-05	DOWN	TRINITY_DN58906_c0_g2	TraesCS7B01G262500.1	1	1419	1419	0	TraesCS7B01G262500	chr7B	483531593	483541865	Receptor-like kinase
	TRINITY_DN101197_c0_g1	-9.20857	2.71e-07	4.67e-06	DOWN	TRINITY_DN101197_c0_g1	TraesCS7B01G291200.1	466	84	750	0	TraesCS7B01G291200	chr7B	527877206	527880625	RPM1-interacting protein 4
	TRINITY_DN59093_c1_g1	-9.20608	1.68e-07	3.07e-06	DOWN	TRINITY_DN59093_c1_g1	TraesCS7A01G155200.1	215	1	2421	6.39e-110	TraesCS7A01G155200	chr7A	108236132	108238654	Kinase
	TRINITY_DN65131_c0_g1	-9.20543	4.63e-08	9.6e-07	DOWN	TRINITY_DN65131_c0_g1	TraesCS7A01G070500.1	198	261	261	6.04e-26	TraesCS7A01G070500	chr7A	36309525	36310301	Avr9/Cf-9 rapidly elicited protein
	TRINITY_DN1811_c2_g1	-9.19216	2.14e-10	7.1e-09	DOWN	TRINITY_DN1811_c2_g1	TraesCS7D01G443500.1	547	597	597	6.43e-19	TraesCS7D01G443500	chr7D	563662947	563666157	Carbonic anhydrase
	TRINITY_DN21917_c0_g1	-9.18574	3.44e-07	5.77e-06	DOWN	TRINITY_DN21917_c0_g1	TraesCS5A01G023800.1	484	684	1074	8.44e-74	TraesCS5A01G023800	chr5A	18857169	18858770	Cysteine protease, putative
	TRINITY_DN4272_c1_g1	-9.18256	5.8e-08	1.17e-06	DOWN	TRINITY_DN4272_c1_g1	TraesCS3D01G331000.1	1394	1533	1533	2.28e-68	TraesCS3D01G331000	chr3D	443435181	443438738	Beta-glucosidase, putative
	TRINITY_DN27203_c0_g1	-9.17793	3.54e-08	7.5e-07	DOWN	NA	NA	NA	NA	NA	NA	NA	NA	NA	NA	NA
	TRINITY_DN25777_c0_g2	-9.16929	1.2e-07	2.27e-06	DOWN	TRINITY_DN25777_c0_g2	TraesCS5B01G371500.1	1	374	417	8.19e-180	TraesCS5B01G371500	chr5B	550193335	550193751	Translation initiation factor IF-2
	TRINITY_DN9769_c0_g1	-9.16347	4.16e-11	1.58e-09	DOWN	TRINITY_DN9769_c0_g1	TraesCS4D01G189100.1	1	1704	1704	0	TraesCS4D01G189100	chr4D	328997298	328999001	Pectinesterase
	TRINITY_DN670_c0_g3	-9.15932	7.28e-08	1.44e-06	DOWN	TRINITY_DN670_c0_g3	TraesCS3B01G297700.1	519	228	546	1.04e-152	TraesCS3B01G297700	chr3B	477369202	477369943	DUF4228 domain protein
	TRINITY_DN19792_c0_g3	-9.15862	5.14e-10	1.59e-08	DOWN	TRINITY_DN19792_c0_g3	TraesCS3D01G056300.1	183	1	1758	2.81e-92	TraesCS3D01G056300	chr3D	23229137	23230993	Peptide transporter
	TRINITY_DN25673_c0_g1	-9.1491	7.26e-09	1.79e-07	DOWN	TRINITY_DN25673_c0_g1	TraesCS5B01G197200.1	1	197	1089	5.77e-100	TraesCS5B01G197200	chr5B	355234800	355235888	Ring finger protein, putative
	TRINITY_DN19950_c0_g1	-9.14411	8.23e-09	2.01e-07	DOWN	TRINITY_DN19950_c0_g1	TraesCS2A01G071900.1	1017	1521	2163	0	TraesCS2A01G071900	chr2A	31970517	31979047	Receptor-like protein kinase
	TRINITY_DN6182_c0_g1	-9.13033	2.27e-10	7.49e-09	DOWN	TRINITY_DN6182_c0_g1	TraesCS6B01G048100.1	1	183	1002	1.63e-78	TraesCS6B01G048100	chr6B	28114526	28116811	2-oxoglutarate and Fe(II)-dependent oxygenase superfamily protein, putative
	TRINITY_DN41192_c0_g1	-9.13007	2.91e-12	1.34e-10	DOWN	TRINITY_DN41192_c0_g1	TraesCS4D01G322100.1	5	291	291	3.66e-141	TraesCS4D01G322100	chr4D	484293846	484294254	KED-like protein
	TRINITY_DN31585_c0_g1	-9.12359	2.38e-07	4.17e-06	DOWN	NA	NA	NA	NA	NA	NA	NA	NA	NA	NA	NA
	TRINITY_DN69502_c0_g1	-9.12014	4.75e-10	1.48e-08	DOWN	TRINITY_DN69502_c0_g1	TraesCS7A01G167100.1	2709	2919	2967	3.6e-106	TraesCS7A01G167100	chr7A	122334187	122343477	Kinesin-like protein
	TRINITY_DN96940_c1_g1	-9.10956	4.26e-08	8.89e-07	DOWN	TRINITY_DN96940_c1_g1	TraesCS1A01G003600.1	1	2802	2802	0	TraesCS1A01G003600	chr1A	2229188	2236819	Protein kinase family protein
	TRINITY_DN23932_c2_g1	-9.10629	5.82e-08	1.18e-06	DOWN	NA	NA	NA	NA	NA	NA	NA	NA	NA	NA	NA
	TRINITY_DN47407_c0_g1	-9.09957	7.19e-10	2.16e-08	DOWN	NA	NA	NA	NA	NA	NA	NA	NA	NA	NA	NA
	TRINITY_DN48473_c0_g6	-9.09184	7.31e-10	2.19e-08	DOWN	TRINITY_DN48473_c0_g6	TraesCS3D01G466900.1	467	709	1083	2.06e-120	TraesCS3D01G466900	chr3D	570145157	570146593	Jasmonate O-methyltransferase
	TRINITY_DN17055_c1_g1	-9.0809	2.3e-09	6.23e-08	DOWN	NA	NA	NA	NA	NA	NA	NA	NA	NA	NA	NA
	TRINITY_DN109916_c0_g1	-9.08037	7.38e-08	1.45e-06	DOWN	TRINITY_DN109916_c0_g1	TraesCS5A01G345500.1	200	411	411	2.29e-108	TraesCS5A01G345500	chr5A	549192581	549192991	SAUR-like auxin-responsive protein family
	TRINITY_DN17031_c0_g2	-9.07971	2.72e-09	7.27e-08	DOWN	TRINITY_DN17031_c0_g2	TraesCS2D01G523100.1	3568	3312	3648	2.69e-118	TraesCS2D01G523100	chr2D	611892623	611898627	ABC transporter ATP-binding protein
	TRINITY_DN36706_c0_g1	-9.07422	6.02e-09	1.5e-07	DOWN	TRINITY_DN36706_c0_g1	TraesCS2B01G233700.1	1	195	1740	6.96e-94	TraesCS2B01G233700	chr2B	232289505	232291558	Laccase
	TRINITY_DN59858_c0_g1	-9.07383	8.33e-10	2.46e-08	DOWN	TRINITY_DN59858_c0_g1	TraesCS1D01G039500.1	1657	1896	2145	6.77e-124	TraesCS1D01G039500	chr1D	19022441	19024844	Phenylalanine ammonia-lyase
	TRINITY_DN208427_c0_g1	-9.06546	2.01e-07	3.58e-06	DOWN	NA	NA	NA	NA	NA	NA	NA	NA	NA	NA	NA
	TRINITY_DN51124_c0_g1	-9.05594	1.51e-07	2.79e-06	DOWN	NA	NA	NA	NA	NA	NA	NA	NA	NA	NA	NA
	TRINITY_DN11515_c0_g1	-9.0538	9.57e-14	5.62e-12	DOWN	TRINITY_DN11515_c0_g1	TraesCS2A01G254500.1	1	678	678	0	TraesCS2A01G254500	chr2A	387679190	387680149	Disease resistance protein (TIR-NBS-LRR class) family
	TRINITY_DN24120_c0_g1	-9.0536	2.53e-06	3.35e-05	DOWN	TRINITY_DN24120_c0_g1	TraesCS5D01G297100.1	168	437	864	1.63e-135	TraesCS5D01G297100	chr5D	393994133	393995441	Bidirectional sugar transporter SWEET
	TRINITY_DN49254_c0_g1	-9.05147	1.95e-08	4.38e-07	DOWN	TRINITY_DN49254_c0_g1	TraesCS2A01G023000.1	660	939	1533	2.23e-124	TraesCS2A01G023000	chr2A	11215312	11217739	Cytochrome P450
	TRINITY_DN39367_c0_g1	-9.03858	1.89e-07	3.4e-06	DOWN	TRINITY_DN39367_c0_g1	TraesCS3D01G486400.1	294	519	519	1.99e-99	TraesCS3D01G486400	chr3D	582249927	582250445	Dirigent protein
	TRINITY_DN57834_c1_g1	-9.0377	1.75e-09	4.87e-08	DOWN	NA	NA	NA	NA	NA	NA	NA	NA	NA	NA	NA
	TRINITY_DN4195_c0_g2	-9.0341	1.18e-06	1.72e-05	DOWN	NA	NA	NA	NA	NA	NA	NA	NA	NA	NA	NA
	TRINITY_DN18023_c1_g1	-9.02726	2.11e-06	2.86e-05	DOWN	TRINITY_DN18023_c1_g1	TraesCS5D01G244300.3	62	262	1719	1.04e-98	TraesCS5D01G244300	chr5D	352824244	352827869	Remorin
	TRINITY_DN151624_c0_g1	-9.02543	2.71e-09	7.25e-08	DOWN	TRINITY_DN151624_c0_g1	TraesCS3D01G288600.1	716	784	1884	7.85e-29	TraesCS3D01G288600	chr3D	397209711	397213535	Sulfate transporter, putative
	TRINITY_DN19020_c1_g3	-9.0254	3.18e-07	5.38e-06	DOWN	NA	NA	NA	NA	NA	NA	NA	NA	NA	NA	NA
	TRINITY_DN17403_c0_g1	-9.02307	1.98e-06	2.71e-05	DOWN	TRINITY_DN17403_c0_g1	TraesCS7A01G293900.1	1071	1318	1935	2.52e-123	TraesCS7A01G293900	chr7A	377635211	377637453	U-box domain-containing protein
	TRINITY_DN60167_c0_g1	-9.02307	1.98e-06	2.71e-05	DOWN	TRINITY_DN60167_c0_g1	TraesCS1A01G410100.1	289	546	546	3.7e-132	TraesCS1A01G410100	chr1A	571573873	571574524	Blue copper
	TRINITY_DN17615_c0_g1	-9.02243	5.36e-07	8.52e-06	DOWN	TRINITY_DN17615_c0_g1	TraesCS5D01G046400.1	121	482	810	0	TraesCS5D01G046400	chr5D	45205928	45209406	Bidirectional sugar transporter SWEET
	TRINITY_DN1724_c0_g1	-9.02207	0.00125381	0.00810782	DOWN	TRINITY_DN1724_c0_g1	TraesCS4D01G355300.1	1	357	357	0	TraesCS4D01G355300	chr4D	504511646	504512051	Pollen allergen-like protein
	TRINITY_DN62873_c1_g1	-9.0212	4.65e-09	1.19e-07	DOWN	TRINITY_DN62873_c1_g1	TraesCS3A01G232500.1	770	516	993	3.36e-127	TraesCS3A01G232500	chr3A	434068897	434070311	Zinc finger CCCH domain protein
	TRINITY_DN50706_c0_g3	-9.01925	2.06e-09	5.65e-08	DOWN	NA	NA	NA	NA	NA	NA	NA	NA	NA	NA	NA
	TRINITY_DN74491_c0_g1	-9.01816	3.96e-09	1.03e-07	DOWN	TRINITY_DN74491_c0_g1	TraesCS3B01G308800.1	1744	1804	1995	1.82e-24	TraesCS3B01G308800	chr3B	497088409	497093274	Protein kinase family protein
	TRINITY_DN10774_c0_g1	-9.0171	3.87e-07	6.41e-06	DOWN	NA	NA	NA	NA	NA	NA	NA	NA	NA	NA	NA
	TRINITY_DN16788_c0_g2	-9.01206	7e-08	1.39e-06	DOWN	NA	NA	NA	NA	NA	NA	NA	NA	NA	NA	NA
	TRINITY_DN116658_c0_g1	-9.01171	8.67e-07	1.3e-05	DOWN	TRINITY_DN116658_c0_g1	TraesCS6A01G024300.1	708	768	1302	2.02e-24	TraesCS6A01G024300	chr6A	12117881	12120107	Kinase family protein
	TRINITY_DN15065_c0_g3	-9.01117	2.06e-08	4.59e-07	DOWN	TRINITY_DN15065_c0_g3	TraesCS4A01G301200.1	287	426	426	6.94e-68	TraesCS4A01G301200	chr4A	598451057	598451640	Zinc finger protein 512B family
	TRINITY_DN23932_c5_g1	-9.01107	3.2e-06	4.13e-05	DOWN	NA	NA	NA	NA	NA	NA	NA	NA	NA	NA	NA
	TRINITY_DN67307_c0_g1	-9.00342	5.76e-09	1.44e-07	DOWN	TRINITY_DN67307_c0_g1	TraesCS7A01G430200.1	127	424	603	1.11e-122	TraesCS7A01G430200	chr7A	624840737	624841339	UPF0345 protein YaiE
	TRINITY_DN35733_c0_g1	-9.00197	3.14e-07	5.33e-06	DOWN	TRINITY_DN35733_c0_g1	TraesCS4D01G014100.1	1	166	417	1e-82	TraesCS4D01G014100	chr4D	6521508	6522507	WRKY transcription factor
	TRINITY_DN57182_c0_g1	-8.99835	2.41e-09	6.5e-08	DOWN	TRINITY_DN57182_c0_g1	TraesCS7D01G486400.1	2165	2369	2772	7.65e-93	TraesCS7D01G486400	chr7D	596706475	596711624	Disease resistance protein RPM1
	TRINITY_DN92902_c0_g1	-8.99661	5.25e-09	1.33e-07	DOWN	NA	NA	NA	NA	NA	NA	NA	NA	NA	NA	NA
	TRINITY_DN83570_c0_g1	-8.99517	6.22e-09	1.55e-07	DOWN	TRINITY_DN83570_c0_g1	TraesCS7A01G015200.1	1824	1894	2535	5.4e-30	TraesCS7A01G015200	chr7A	6651167	6658327	receptor kinase 1
	TRINITY_DN180997_c0_g1	-8.98936	1.35e-08	3.14e-07	DOWN	TRINITY_DN180997_c0_g1	TraesCS4D01G361600.1	2305	2508	2508	1.22e-103	TraesCS4D01G361600	chr4D	508339550	508342829	Serine/threonine-protein kinase
	TRINITY_DN74656_c0_g1	-8.98817	7.11e-07	1.09e-05	DOWN	TRINITY_DN74656_c0_g1	TraesCS6B01G388000.1	770	990	4437	2.25e-113	TraesCS6B01G388000	chr6B	662886039	662893269	QWRF motif protein (DUF566)
	TRINITY_DN51118_c0_g1	-8.98736	7.31e-08	1.44e-06	DOWN	NA	NA	NA	NA	NA	NA	NA	NA	NA	NA	NA
	TRINITY_DN59867_c3_g2	-8.98546	7.22e-08	1.43e-06	DOWN	NA	NA	NA	NA	NA	NA	NA	NA	NA	NA	NA
	TRINITY_DN48763_c0_g1	-8.98273	2.11e-08	4.7e-07	DOWN	NA	NA	NA	NA	NA	NA	NA	NA	NA	NA	NA
	TRINITY_DN77167_c0_g1	-8.9825	8.86e-07	1.33e-05	DOWN	TRINITY_DN77167_c0_g1	TraesCS1A01G291100.1	14	220	1380	1.01e-98	TraesCS1A01G291100	chr1A	487330631	487333866	Aminotransferase-related family protein
	TRINITY_DN786_c1_g1	-8.98172	2.92e-09	7.77e-08	DOWN	TRINITY_DN786_c1_g1	TraesCS2B01G551800.1	238	339	339	6.91e-29	TraesCS2B01G551800	chr2B	747854897	747855235	Brefeldin A-inhibited guanine nucleotide-exchange protein 1
	TRINITY_DN22506_c0_g2	-8.98126	1.75e-08	3.97e-07	DOWN	NA	NA	NA	NA	NA	NA	NA	NA	NA	NA	NA
	TRINITY_DN23063_c0_g1	-8.97639	3.7e-07	6.16e-06	DOWN	NA	NA	NA	NA	NA	NA	NA	NA	NA	NA	NA
	TRINITY_DN35319_c0_g1	-8.9736	3.88e-09	1.01e-07	DOWN	TRINITY_DN35319_c0_g1	TraesCS3B01G286400.1	772	823	918	9.59e-18	TraesCS3B01G286400	chr3B	458170092	458171793	RING/U-box superfamily protein
	TRINITY_DN73625_c0_g1	-8.96847	4.32e-07	7.04e-06	DOWN	NA	NA	NA	NA	NA	NA	NA	NA	NA	NA	NA
	TRINITY_DN23030_c0_g1	-8.96686	1.62e-06	2.27e-05	DOWN	TRINITY_DN23030_c0_g1	TraesCS6B01G321600.1	153	1635	1986	0	TraesCS6B01G321600	chr6B	569820759	569828084	Aluminum activated malate transporter family protein
	TRINITY_DN12264_c0_g1	-8.96579	1.45e-06	2.05e-05	DOWN	TRINITY_DN12264_c0_g1	TraesCS1D01G289700.1	1441	1491	1491	8.43e-19	TraesCS1D01G289700	chr1D	387796872	387800792	Aminotransferase-related family protein
	TRINITY_DN49043_c0_g1	-8.96461	2.11e-07	3.75e-06	DOWN	TRINITY_DN49043_c0_g1	TraesCS2D01G218700.1	1188	1403	2124	2.86e-107	TraesCS2D01G218700	chr2D	182573791	182575914	Phenylalanine ammonia-lyase
	TRINITY_DN32489_c0_g1	-8.96298	2.36e-08	5.19e-07	DOWN	NA	NA	NA	NA	NA	NA	NA	NA	NA	NA	NA
	TRINITY_DN34671_c0_g1	-8.96226	4.22e-09	1.09e-07	DOWN	TRINITY_DN34671_c0_g1	TraesCS7D01G012400.1	883	978	2769	1.14e-41	TraesCS7D01G012400	chr7D	5330825	5337326	receptor kinase 1
	TRINITY_DN133902_c0_g1	-8.9622	3.46e-06	4.42e-05	DOWN	NA	NA	NA	NA	NA	NA	NA	NA	NA	NA	NA
	TRINITY_DN22202_c1_g2	-8.9576	5.56e-09	1.4e-07	DOWN	TRINITY_DN22202_c1_g2	TraesCS1D01G337800.1	1053	1080	1080	7.79e-06	TraesCS1D01G337800	chr1D	427318206	427319617	O-methyltransferase-like protein
	TRINITY_DN4375_c1_g2	-8.95704	1.2e-08	2.83e-07	DOWN	NA	NA	NA	NA	NA	NA	NA	NA	NA	NA	NA
	TRINITY_DN4195_c0_g1	-8.95612	4.53e-14	2.81e-12	DOWN	NA	NA	NA	NA	NA	NA	NA	NA	NA	NA	NA
	TRINITY_DN22179_c0_g1	-8.95222	1.04e-07	1.99e-06	DOWN	TRINITY_DN22179_c0_g1	TraesCS5A01G426800.1	440	846	1761	0	TraesCS5A01G426800	chr5A	611649631	611653278	Calcium-dependent protein kinase
	TRINITY_DN21901_c0_g1	-8.95114	2.77e-07	4.76e-06	DOWN	NA	NA	NA	NA	NA	NA	NA	NA	NA	NA	NA
	TRINITY_DN68341_c0_g2	-8.95046	2.81e-06	3.68e-05	DOWN	TRINITY_DN68341_c0_g2	TraesCS2D01G438500.1	186	318	318	2.02e-64	TraesCS2D01G438500	chr2D	547951551	547951868	Protease inhibitor/seed storage/lipid transfer protein family protein
	TRINITY_DN11675_c0_g2	-8.93001	1.89e-08	4.25e-07	DOWN	TRINITY_DN11675_c0_g2	TraesCS3B01G244700.1	1382	1157	2022	3.83e-116	TraesCS3B01G244700	chr3B	387426155	387436694	Pentatricopeptide repeat-containing protein
	TRINITY_DN49951_c0_g1	-8.92529	1.35e-08	3.14e-07	DOWN	TRINITY_DN49951_c0_g1	TraesCS7D01G081000.1	1352	1458	1458	5.82e-50	TraesCS7D01G081000	chr7D	47648753	47650290	UDP-glycosyltransferase
	TRINITY_DN70107_c0_g1	-8.92497	7.37e-09	1.81e-07	DOWN	TRINITY_DN70107_c0_g1	TraesCS5A01G338100.1	1266	1467	1467	7.45e-103	TraesCS5A01G338100	chr5A	546205973	546207550	Ankyrin repeat family protein, putative, expressed
	TRINITY_DN32012_c0_g1	-8.92385	1.21e-06	1.76e-05	DOWN	NA	NA	NA	NA	NA	NA	NA	NA	NA	NA	NA
	TRINITY_DN113091_c1_g2	-8.91087	2.59e-08	5.66e-07	DOWN	NA	NA	NA	NA	NA	NA	NA	NA	NA	NA	NA
	TRINITY_DN5295_c1_g1	-8.90918	2.72e-07	4.68e-06	DOWN	TRINITY_DN5295_c1_g1	TraesCS3D01G323900.1	1	833	1017	0	TraesCS3D01G323900	chr3D	437026114	437027881	Beta-1,3-glucanase
	TRINITY_DN77204_c1_g1	-8.90885	2.44e-07	4.25e-06	DOWN	NA	NA	NA	NA	NA	NA	NA	NA	NA	NA	NA
	TRINITY_DN57909_c0_g1	-8.90677	9.29e-08	1.8e-06	DOWN	NA	NA	NA	NA	NA	NA	NA	NA	NA	NA	NA
	TRINITY_DN84053_c0_g2	-8.9043	2.48e-07	4.31e-06	DOWN	TRINITY_DN84053_c0_g2	TraesCS6B01G414600.1	175	228	288	1.77e-20	TraesCS6B01G414600	chr6B	687413028	687413815	Maltoporin
	TRINITY_DN54942_c2_g1	-8.90263	1.15e-08	2.73e-07	DOWN	NA	NA	NA	NA	NA	NA	NA	NA	NA	NA	NA
	TRINITY_DN67807_c0_g1	-8.90102	9.38e-08	1.81e-06	DOWN	TRINITY_DN67807_c0_g1	TraesCS2A01G481200.1	302	366	1029	6.14e-25	TraesCS2A01G481200	chr2A	718574651	718576202	Anthocyanidin reductase
	TRINITY_DN41426_c0_g3	-8.89718	4.73e-07	7.65e-06	DOWN	TRINITY_DN41426_c0_g3	TraesCS4D01G147000.1	1020	764	1170	1.2e-131	TraesCS4D01G147000	chr4D	137764939	137767808	MADS-box transcription factor family protein
	TRINITY_DN71968_c0_g2	-8.88903	8.18e-08	1.6e-06	DOWN	NA	NA	NA	NA	NA	NA	NA	NA	NA	NA	NA
	TRINITY_DN76442_c0_g1	-8.88669	1.29e-08	3.01e-07	DOWN	NA	NA	NA	NA	NA	NA	NA	NA	NA	NA	NA
	TRINITY_DN61593_c0_g1	-8.88253	4.92e-06	6.07e-05	DOWN	NA	NA	NA	NA	NA	NA	NA	NA	NA	NA	NA
	TRINITY_DN2470_c0_g1	-8.88252	3.51e-09	9.18e-08	DOWN	TRINITY_DN2470_c0_g1	TraesCS6A01G196000.1	1	954	1311	0	TraesCS6A01G196000	chr6A	283928050	283932714	Rop guanine nucleotide exchange factor
	TRINITY_DN14368_c0_g1	-8.87803	4.28e-06	5.37e-05	DOWN	TRINITY_DN14368_c0_g1	TraesCS6B01G111000.1	1	504	861	0	TraesCS6B01G111000	chr6B	93302844	93304086	Pollen allergen Phl p 5
	TRINITY_DN64461_c0_g1	-8.87665	8.62e-08	1.68e-06	DOWN	TRINITY_DN64461_c0_g1	TraesCS5B01G222500.1	1331	1540	2481	2.77e-107	TraesCS5B01G222500	chr5B	397513718	397516979	Phospholipase D
	TRINITY_DN62035_c0_g1	-8.87536	6.11e-08	1.23e-06	DOWN	TRINITY_DN62035_c0_g1	TraesCS2D01G102400.1	697	861	861	7.04e-82	TraesCS2D01G102400	chr2D	55255015	55256482	Translation initiation factor IF-2
	TRINITY_DN48552_c0_g2	-8.87444	4.27e-07	6.98e-06	DOWN	TRINITY_DN48552_c0_g2	TraesCS1D01G337800.1	534	823	1080	1.34e-151	TraesCS1D01G337800	chr1D	427318206	427319617	O-methyltransferase-like protein
	TRINITY_DN18510_c1_g2	-8.86764	8.6e-08	1.67e-06	DOWN	TRINITY_DN18510_c1_g2	TraesCS7A01G157000.1	85	317	1077	5.1e-120	TraesCS7A01G157000	chr7A	109840874	109843484	Tac7077
	TRINITY_DN12566_c0_g1	-8.86414	4.39e-11	1.65e-09	DOWN	TRINITY_DN12566_c0_g1	TraesCS6D01G219200.1	1	642	642	0	TraesCS6D01G219200	chr6D	309041173	309042302	LIM domain containing protein
	TRINITY_DN172432_c0_g1	-8.8518	1.92e-08	4.31e-07	DOWN	TRINITY_DN172432_c0_g1	TraesCS7A01G127600.1	127	182	855	1.27e-21	TraesCS7A01G127600	chr7A	81858625	81859948	Caffeoyl-CoA O-methyltransferase
	TRINITY_DN4730_c1_g1	-8.8491	1.97e-06	2.7e-05	DOWN	TRINITY_DN4730_c1_g1	TraesCS2B01G427200.1	1	2406	2406	0	TraesCS2B01G427200	chr2B	614396546	614398951	Subtilisin-like protease
	TRINITY_DN61648_c1_g1	-8.84736	2.26e-08	5e-07	DOWN	NA	NA	NA	NA	NA	NA	NA	NA	NA	NA	NA
	TRINITY_DN1284_c1_g2	-8.84452	3.25e-08	6.94e-07	DOWN	NA	NA	NA	NA	NA	NA	NA	NA	NA	NA	NA
	TRINITY_DN33539_c0_g2	-8.84223	2e-07	3.57e-06	DOWN	TRINITY_DN33539_c0_g2	TraesCS4A01G490700.1	983	1347	2046	3.83e-123	TraesCS4A01G490700	chr4A	740602459	740604504	Leucine-rich repeat receptor-like protein kinase family protein, putative
	TRINITY_DN172455_c0_g1	-8.8369	4.42e-08	9.21e-07	DOWN	TRINITY_DN172455_c0_g1	TraesCS2A01G290900.1	862	893	1488	2.96e-08	TraesCS2A01G290900	chr2A	501317503	501322799	Acetyl-coenzyme A synthetase
	TRINITY_DN59246_c0_g1	-8.83641	6.05e-07	9.49e-06	DOWN	NA	NA	NA	NA	NA	NA	NA	NA	NA	NA	NA
	TRINITY_DN107341_c0_g1	-8.83309	1.45e-07	2.69e-06	DOWN	TRINITY_DN107341_c0_g1	TraesCS1B01G152800.1	204	55	1224	2.22e-58	TraesCS1B01G152800	chr1B	246768363	246800383	E3 ubiquitin-protein ligase
	TRINITY_DN26811_c0_g1	-8.82972	1.3e-05	0.000142957	DOWN	TRINITY_DN26811_c0_g1	TraesCS5D01G342900.1	125	423	423	4.77e-150	TraesCS5D01G342900	chr5D	431127274	431127696	Plant thionin family protein
	TRINITY_DN20201_c1_g1	-8.82764	5.09e-08	1.05e-06	DOWN	TRINITY_DN20201_c1_g1	TraesCS3A01G063900.1	1	108	384	1.44e-50	TraesCS3A01G063900	chr3A	38125304	38125687	Germin-like protein
	TRINITY_DN37234_c0_g1	-8.82646	1.23e-07	2.32e-06	DOWN	TRINITY_DN37234_c0_g1	TraesCS7D01G498300.1	2736	2961	4074	3.83e-116	TraesCS7D01G498300	chr7D	604981107	604995960	Aldehyde oxidase, putative
	TRINITY_DN97099_c0_g1	-8.825	7.79e-08	1.53e-06	DOWN	NA	NA	NA	NA	NA	NA	NA	NA	NA	NA	NA
	TRINITY_DN77433_c0_g2	-8.82214	1.95e-07	3.49e-06	DOWN	TRINITY_DN77433_c0_g2	TraesCS3A01G392800.1	1273	1478	1746	9.81e-102	TraesCS3A01G392800	chr3A	640679084	640702807	Peptide transporter
	TRINITY_DN71570_c1_g1	-8.81764	1.42e-06	2.03e-05	DOWN	TRINITY_DN71570_c1_g1	TraesCS7D01G055800.1	1073	836	1089	1.42e-122	TraesCS7D01G055800	chr7D	29830560	29832156	Short-chain dehydrogenase/reductase family protein
	TRINITY_DN23795_c1_g1	-8.81668	5.61e-08	1.14e-06	DOWN	TRINITY_DN23795_c1_g1	TraesCS4A01G388600.1	104	348	1026	5.85e-75	TraesCS4A01G388600	chr4A	666149057	666151389	Fatty acyl-CoA reductase
	TRINITY_DN3961_c1_g1	-8.80744	3.93e-07	6.49e-06	DOWN	NA	NA	NA	NA	NA	NA	NA	NA	NA	NA	NA
	TRINITY_DN63581_c0_g1	-8.80729	6.93e-08	1.38e-06	DOWN	TRINITY_DN63581_c0_g1	TraesCS3D01G493300.1	1	300	300	1e-156	TraesCS3D01G493300	chr3D	586582322	586582621	Oxidation resistance protein 1
	TRINITY_DN4674_c0_g1	-8.80382	1.71e-15	1.29e-13	DOWN	TRINITY_DN4674_c0_g1	TraesCS3D01G295900.1	1	1434	1434	0	TraesCS3D01G295900	chr3D	409011171	409012703	Non-specific serine/threonine protein kinase
	TRINITY_DN1201_c2_g2	-8.80308	3.17e-07	5.38e-06	DOWN	TRINITY_DN1201_c2_g2	TraesCS1A01G443500.1	1	850	861	0	TraesCS1A01G443500	chr1A	591947308	591948274	Carbonic anhydrase
	TRINITY_DN228025_c0_g1	-8.8024	4.12e-07	6.76e-06	DOWN	NA	NA	NA	NA	NA	NA	NA	NA	NA	NA	NA
	TRINITY_DN25022_c0_g3	-8.79802	5.07e-07	8.12e-06	DOWN	TRINITY_DN25022_c0_g3	TraesCS7B01G283400.1	1100	884	1722	4.14e-106	TraesCS7B01G283400	chr7B	517623748	517625982	Peptide transporter
	TRINITY_DN103844_c0_g1	-8.79664	2.1e-07	3.73e-06	DOWN	TRINITY_DN103844_c0_g1	TraesCS3D01G487500.1	1254	1154	1254	2.23e-29	TraesCS3D01G487500	chr3D	582832099	582833380	U3 small nucleolar RNA-associated protein 18-like protein
	TRINITY_DN5597_c0_g1	-8.79631	4.54e-07	7.37e-06	DOWN	TRINITY_DN5597_c0_g1	TraesCS1B01G477800.1	1	409	591	0	TraesCS1B01G477800	chr1B	685824759	685825349	tRNA uridine 5-carboxymethylaminomethyl modification enzyme MnmG
	TRINITY_DN11291_c0_g1	-8.7934	3.09e-05	0.000311923	DOWN	TRINITY_DN11291_c0_g1	TraesCS1D01G011400.1	1717	1950	2895	1e-98	TraesCS1D01G011400	chr1D	6264619	6268342	Leucine-rich repeat receptor-like protein kinase family
	TRINITY_DN44444_c0_g1	-8.79092	4.68e-08	9.69e-07	DOWN	NA	NA	NA	NA	NA	NA	NA	NA	NA	NA	NA
	TRINITY_DN48927_c0_g1	-8.78927	4.86e-08	1e-06	DOWN	TRINITY_DN48927_c0_g1	TraesCSU01G149100.1	981	1110	1152	1.17e-47	TraesCSU01G149100	chrUn	177131438	177132904	Cytochrome P450
	TRINITY_DN20722_c1_g2	-8.78794	5.22e-08	1.07e-06	DOWN	TRINITY_DN20722_c1_g2	TraesCS5D01G419000.1	2909	2665	3531	5.43e-115	TraesCS5D01G419000	chr5D	480376304	480380513	Auxin-responsive protein
	TRINITY_DN54443_c0_g1	-8.7836	9.99e-07	1.48e-05	DOWN	TRINITY_DN54443_c0_g1	TraesCS5A01G085200.1	1789	1848	2139	8.19e-24	TraesCS5A01G085200	chr5A	111623468	111627617	Boron transporter
	TRINITY_DN43873_c1_g6	-8.78246	1.24e-06	1.8e-05	DOWN	NA	NA	NA	NA	NA	NA	NA	NA	NA	NA	NA
	TRINITY_DN14723_c0_g2	-8.78161	1.87e-12	8.89e-11	DOWN	TRINITY_DN14723_c0_g2	TraesCS7D01G146700.1	152	2571	2841	0	TraesCS7D01G146700	chr7D	93788786	93791849	Plasma membrane ATPase
	TRINITY_DN71416_c0_g1	-8.77923	4.6e-07	7.45e-06	DOWN	TRINITY_DN71416_c0_g1	TraesCS2A01G320400.1	1314	1360	1530	1.47e-16	TraesCS2A01G320400	chr2A	549966024	549971178	Glucose-6-phosphate 1-dehydrogenase
	TRINITY_DN67911_c0_g2	-8.7782	1.76e-07	3.18e-06	DOWN	NA	NA	NA	NA	NA	NA	NA	NA	NA	NA	NA
	TRINITY_DN73124_c0_g2	-8.77548	3.67e-07	6.12e-06	DOWN	TRINITY_DN73124_c0_g2	TraesCS5A01G317000.1	2270	2350	2649	1.67e-35	TraesCS5A01G317000	chr5A	527917420	527922372	Kinesin-like protein
	TRINITY_DN13538_c1_g1	-8.77135	3.71e-07	6.17e-06	DOWN	TRINITY_DN13538_c1_g1	TraesCS2B01G414000.1	963	1175	1509	6.14e-109	TraesCS2B01G414000	chr2B	591912478	591913986	rRNA-processing protein efg1
	TRINITY_DN57641_c2_g1	-8.77077	1.76e-07	3.19e-06	DOWN	NA	NA	NA	NA	NA	NA	NA	NA	NA	NA	NA
	TRINITY_DN35377_c0_g1	-8.76963	5.25e-12	2.32e-10	DOWN	TRINITY_DN35377_c0_g1	TraesCS2B01G255200.1	1	420	420	0	TraesCS2B01G255200	chr2B	290519626	290523473	Actin-depolymerizing factor
	TRINITY_DN10431_c1_g5	-8.76684	1.83e-07	3.3e-06	DOWN	NA	NA	NA	NA	NA	NA	NA	NA	NA	NA	NA
	TRINITY_DN140391_c0_g1	-8.76511	1.48e-07	2.74e-06	DOWN	TRINITY_DN140391_c0_g1	TraesCS7A01G023100.1	894	954	1500	2.98e-24	TraesCS7A01G023100	chr7A	9108611	9110315	Cytochrome P450 family protein, expressed
	TRINITY_DN65177_c0_g1	-8.75463	1.05e-06	1.55e-05	DOWN	TRINITY_DN65177_c0_g1	TraesCS2A01G075500.1	894	1325	1338	0	TraesCS2A01G075500	chr2A	33562850	33564285	Acyl-[acyl-carrier-protein] desaturase
	TRINITY_DN83_c0_g1	-8.75004	0.00025169	0.00203374	DOWN	TRINITY_DN83_c0_g1	TraesCS1A01G403700.1	1	555	555	0	TraesCS1A01G403700	chr1A	566687014	566687568	Pectinesterase
	TRINITY_DN29135_c1_g1	-8.74915	1.42e-07	2.63e-06	DOWN	TRINITY_DN29135_c1_g1	TraesCS4D01G361600.1	1933	2340	2508	0	TraesCS4D01G361600	chr4D	508339550	508342829	Serine/threonine-protein kinase
	TRINITY_DN111592_c0_g1	-8.74751	2.88e-06	3.75e-05	DOWN	TRINITY_DN111592_c0_g1	TraesCS7D01G552500.1	611	1005	1005	0	TraesCS7D01G552500	chr7D	635516907	635520421	'putative beta-1,3-glucanase
	TRINITY_DN37987_c0_g2	-8.74662	8.08e-07	1.22e-05	DOWN	TRINITY_DN37987_c0_g2	TraesCS5D01G323700.1	1	171	1539	2.66e-83	TraesCS5D01G323700	chr5D	415678763	415681164	Endoglucanase
	TRINITY_DN54723_c3_g1	-8.74446	1.5e-07	2.77e-06	DOWN	TRINITY_DN54723_c3_g1	TraesCS7B01G497300.1	80	173	1014	3.27e-37	TraesCS7B01G497300	chr7B	747942443	747943456	Sulfotransferase
	TRINITY_DN18318_c0_g2	-8.74207	1.14e-07	2.17e-06	DOWN	TRINITY_DN18318_c0_g2	TraesCS3D01G351000.1	780	576	1608	2.33e-104	TraesCS3D01G351000	chr3D	462203030	462204878	ATP-dependent zinc metalloprotease FtsH
	TRINITY_DN9813_c1_g1	-8.74207	1.14e-07	2.17e-06	DOWN	TRINITY_DN9813_c1_g1	TraesCS2A01G485500.1	1	46	978	3.93e-16	TraesCS2A01G485500	chr2A	720385659	720388102	Lipid phosphate phosphatase-like protein
	TRINITY_DN262230_c0_g1	-8.73837	1.66e-06	2.32e-05	DOWN	NA	NA	NA	NA	NA	NA	NA	NA	NA	NA	NA
	TRINITY_DN60866_c0_g1	-8.73216	1.19e-07	2.25e-06	DOWN	TRINITY_DN60866_c0_g1	TraesCS3D01G516000.1	1	32	1128	2.4e-08	TraesCS3D01G516000	chr3D	599263623	599265750	rRNA N-glycosidase
	TRINITY_DN21603_c0_g1	-8.72687	8.69e-07	1.31e-05	DOWN	NA	NA	NA	NA	NA	NA	NA	NA	NA	NA	NA
	TRINITY_DN24325_c0_g2	-8.72122	8.57e-07	1.29e-05	DOWN	NA	NA	NA	NA	NA	NA	NA	NA	NA	NA	NA
	TRINITY_DN10787_c0_g1	-8.71877	6.14e-13	3.21e-11	DOWN	TRINITY_DN10787_c0_g1	TraesCS7A01G458700.1	1	122	1215	6.45e-58	TraesCS7A01G458700	chr7A	653589482	653593545	MYB-related transcription factor
	TRINITY_DN157698_c0_g1	-8.71766	1.96e-07	3.51e-06	DOWN	TRINITY_DN157698_c0_g1	TraesCS7A01G157300.1	925	710	1767	2.87e-107	TraesCS7A01G157300	chr7A	110422727	110425255	Pectinesterase
	TRINITY_DN37129_c0_g1	-8.71227	3.26e-07	5.5e-06	DOWN	TRINITY_DN37129_c0_g1	TraesCS5B01G006500.1	2709	2787	2787	1.84e-34	TraesCS5B01G006500	chr5B	7706162	7709863	Lipoxygenase
	TRINITY_DN11109_c0_g3	-8.70961	2.44e-06	3.25e-05	DOWN	TRINITY_DN11109_c0_g3	TraesCS1A01G145700.1	547	347	684	2.65e-102	TraesCS1A01G145700	chr1A	251936266	251937029	Adenine nucleotide alpha hydrolases-like superfamily protein, putative
	TRINITY_DN35078_c0_g1	-8.69973	6.38e-07	9.94e-06	DOWN	TRINITY_DN35078_c0_g1	TraesCS1D01G301500.1	769	987	1053	2.88e-112	TraesCS1D01G301500	chr1D	399262824	399263876	Sulfotransferase
	TRINITY_DN68239_c0_g1	-8.69022	4.14e-07	6.79e-06	DOWN	TRINITY_DN68239_c0_g1	TraesCS2B01G391900.1	878	935	1248	1.17e-22	TraesCS2B01G391900	chr2B	556202552	556205909	Endosomal targeting BRO1-like domain-containing protein
	TRINITY_DN29799_c1_g1	-8.68832	2.11e-07	3.74e-06	DOWN	NA	NA	NA	NA	NA	NA	NA	NA	NA	NA	NA
	TRINITY_DN89692_c0_g1	-8.68551	9.99e-07	1.48e-05	DOWN	TRINITY_DN89692_c0_g1	TraesCS3A01G276800.1	1501	1571	2184	2.34e-28	TraesCS3A01G276800	chr3A	506915365	506919863	Glutamate carboxypeptidase 2
	TRINITY_DN99244_c0_g1	-8.68468	1.23e-06	1.79e-05	DOWN	TRINITY_DN99244_c0_g1	TraesCS7A01G557400.1	1118	1383	3099	1.25e-131	TraesCS7A01G557400	chr7A	729935833	729941928	Protein argonaute
	TRINITY_DN29680_c0_g1	-8.68337	1.98e-07	3.53e-06	DOWN	TRINITY_DN29680_c0_g1	TraesCS2D01G322600.1	1468	1709	3792	5.28e-125	TraesCS2D01G322600	chr2D	413951598	413957583	ABC transporter ATP-binding protein
	TRINITY_DN10664_c1_g1	-8.68248	8.37e-07	1.26e-05	DOWN	TRINITY_DN10664_c1_g1	TraesCS3B01G461800.1	2018	2240	3210	8.18e-113	TraesCS3B01G461800	chr3B	704706678	704712591	Sucrose-phosphate synthase
	TRINITY_DN4888_c0_g2	-8.68188	6.96e-06	8.26e-05	DOWN	NA	NA	NA	NA	NA	NA	NA	NA	NA	NA	NA
	TRINITY_DN43376_c0_g2	-8.68181	4.62e-07	7.48e-06	DOWN	TRINITY_DN43376_c0_g2	TraesCS6D01G071600.1	231	15	1638	1.71e-89	TraesCS6D01G071600	chr6D	36221975	36225143	3-ketoacyl-CoA synthase
	TRINITY_DN30406_c0_g1	-8.67993	8.12e-06	9.44e-05	DOWN	TRINITY_DN30406_c0_g1	TraesCS3B01G530000.1	882	987	987	2.72e-49	TraesCS3B01G530000	chr3B	771249906	771254026	'putative beta-1,3-glucanase
	TRINITY_DN54122_c0_g1	-8.67804	2.37e-07	4.15e-06	DOWN	TRINITY_DN54122_c0_g1	TraesCS4D01G117100.1	474	681	960	3.54e-106	TraesCS4D01G117100	chr4D	97957926	97959665	Peroxidase
	TRINITY_DN1986_c0_g1	-8.67686	2.09e-07	3.71e-06	DOWN	TRINITY_DN1986_c0_g1	TraesCS4A01G171300.1	658	1567	1821	0	TraesCS4A01G171300	chr4A	434075695	434077515	Pecanex-like protein 1
	TRINITY_DN40683_c0_g1	-8.67348	5.63e-06	6.86e-05	DOWN	TRINITY_DN40683_c0_g1	TraesCS5B01G379300.1	28	328	1458	5.01e-156	TraesCS5B01G379300	chr5B	557354381	557355838	Patatin
	TRINITY_DN75547_c0_g1	-8.6668	1.93e-06	2.65e-05	DOWN	NA	NA	NA	NA	NA	NA	NA	NA	NA	NA	NA
	TRINITY_DN86099_c0_g1	-8.66445	2.41e-07	4.22e-06	DOWN	TRINITY_DN86099_c0_g1	TraesCS2B01G308900.1	78	333	1767	2.13e-104	TraesCS2B01G308900	chr2B	442085173	442086939	Cytochrome P450
	TRINITY_DN22425_c1_g1	-8.66348	7.38e-07	1.13e-05	DOWN	TRINITY_DN22425_c1_g1	TraesCS1B01G431500.1	980	1029	1137	2.76e-18	TraesCS1B01G431500	chr1B	655847675	655849743	GDP-mannose-3',5'-epimerase
	TRINITY_DN26722_c0_g2	-8.66086	2.52e-07	4.39e-06	DOWN	TRINITY_DN26722_c0_g2	TraesCS7B01G232500.1	1	81	471	6.72e-34	TraesCS7B01G232500	chr7B	435791472	435792305	CASP-like protein
	TRINITY_DN56118_c0_g1	-8.66048	4.07e-07	6.7e-06	DOWN	NA	NA	NA	NA	NA	NA	NA	NA	NA	NA	NA
	TRINITY_DN23391_c0_g2	-8.65626	2.56e-07	4.44e-06	DOWN	NA	NA	NA	NA	NA	NA	NA	NA	NA	NA	NA
	TRINITY_DN48552_c0_g3	-8.65364	3.58e-07	5.98e-06	DOWN	TRINITY_DN48552_c0_g3	TraesCS1B01G348700.1	653	863	1080	7.73e-108	TraesCS1B01G348700	chr1B	578044057	578045423	O-methyltransferase-like protein
	TRINITY_DN29659_c0_g1	-8.65182	3.98e-07	6.57e-06	DOWN	TRINITY_DN29659_c0_g1	TraesCS6B01G119500.2	582	856	1035	2.75e-143	TraesCS6B01G119500	chr6B	114157501	114161192	Transmembrane protein, putative
	TRINITY_DN23678_c1_g2	-8.65038	2.91e-07	4.97e-06	DOWN	NA	NA	NA	NA	NA	NA	NA	NA	NA	NA	NA
	TRINITY_DN12240_c1_g1	-8.64948	1.16e-06	1.69e-05	DOWN	NA	NA	NA	NA	NA	NA	NA	NA	NA	NA	NA
	TRINITY_DN6804_c0_g1	-8.63949	1.5e-06	2.12e-05	DOWN	TRINITY_DN6804_c0_g1	TraesCS2D01G322500.1	54	1299	1758	0	TraesCS2D01G322500	chr2D	413777997	413779866	Pectinesterase
	TRINITY_DN28839_c0_g1	-8.63548	3.63e-06	4.62e-05	DOWN	TRINITY_DN28839_c0_g1	TraesCS3A01G339800.1	1	58	1146	9.71e-23	TraesCS3A01G339800	chr3A	586876989	586881188	WAT1-related protein
	TRINITY_DN41098_c1_g1	-8.6338	2.35e-07	4.13e-06	DOWN	TRINITY_DN41098_c1_g1	TraesCS4D01G175200.1	2672	2876	2880	3.53e-96	TraesCS4D01G175200	chr4D	303518324	303522917	Protein kinase-like protein
	TRINITY_DN13437_c1_g1	-8.63262	7.39e-07	1.13e-05	DOWN	TRINITY_DN13437_c1_g1	TraesCS7D01G154300.1	1	66	1299	3.18e-27	TraesCS7D01G154300	chr7D	101806635	101807933	RING finger protein
	TRINITY_DN138505_c0_g1	-8.63253	1.08e-05	0.000121303	DOWN	NA	NA	NA	NA	NA	NA	NA	NA	NA	NA	NA
	TRINITY_DN51938_c0_g1	-8.63205	8.79e-07	1.32e-05	DOWN	NA	NA	NA	NA	NA	NA	NA	NA	NA	NA	NA
	TRINITY_DN3733_c0_g1	-8.63178	4e-09	1.04e-07	DOWN	TRINITY_DN3733_c0_g1	TraesCS4B01G301300.1	1	1343	1563	0	TraesCS4B01G301300	chr4B	588195328	588198119	Leucine-rich repeat receptor-like protein kinase
	TRINITY_DN27259_c0_g2	-8.63142	4.21e-07	6.88e-06	DOWN	NA	NA	NA	NA	NA	NA	NA	NA	NA	NA	NA
	TRINITY_DN743_c0_g1	-8.62881	8.25e-22	1.28e-19	DOWN	TRINITY_DN743_c0_g1	TraesCS2A01G464200.1	1	188	315	3.52e-93	TraesCS2A01G464200	chr2A	709837729	709838221	RPM1-interacting protein 4
	TRINITY_DN47175_c0_g1	-8.62831	1.24e-06	1.8e-05	DOWN	NA	NA	NA	NA	NA	NA	NA	NA	NA	NA	NA
	TRINITY_DN78193_c0_g1	-8.6258	1.42e-06	2.03e-05	DOWN	TRINITY_DN78193_c0_g1	TraesCS1D01G105300.1	465	621	1020	1.53e-77	TraesCS1D01G105300	chr1D	97214485	97216415	transcription factor-like protein
	TRINITY_DN47522_c0_g1	-8.62503	3.6e-07	6.01e-06	DOWN	NA	NA	NA	NA	NA	NA	NA	NA	NA	NA	NA
	TRINITY_DN95012_c0_g2	-8.6229	4.8e-06	5.93e-05	DOWN	TRINITY_DN95012_c0_g2	TraesCS4D01G003800.1	1618	2202	2208	0	TraesCS4D01G003800	chr4D	1640803	1645673	Kinase family protein
	TRINITY_DN128809_c0_g1	-8.62284	3.98e-06	5.03e-05	DOWN	NA	NA	NA	NA	NA	NA	NA	NA	NA	NA	NA
	TRINITY_DN117111_c0_g1	-8.62188	1.42e-06	2.03e-05	DOWN	TRINITY_DN117111_c0_g1	TraesCS2A01G179500.1	380	438	438	1.33e-11	TraesCS2A01G179500	chr2A	138133652	138134089	IgA FC receptor
	TRINITY_DN52654_c0_g1	-8.62072	6.57e-07	1.02e-05	DOWN	NA	NA	NA	NA	NA	NA	NA	NA	NA	NA	NA
	TRINITY_DN76359_c0_g1	-8.62005	7.74e-07	1.18e-05	DOWN	TRINITY_DN76359_c0_g1	TraesCS3A01G505600.1	1	148	2379	8.35e-73	TraesCS3A01G505600	chr3A	727397644	727400541	Disease resistance protein RPM1
	TRINITY_DN21968_c0_g1	-8.61436	7.24e-07	1.11e-05	DOWN	TRINITY_DN21968_c0_g1	TraesCS4B01G240500.1	559	820	1557	2.04e-134	TraesCS4B01G240500	chr4B	498926043	498928067	calcium/calcium/calmodulin-dependent Serine/Threonine-kinase
	TRINITY_DN191454_c0_g1	-8.61432	4.32e-07	7.05e-06	DOWN	NA	NA	NA	NA	NA	NA	NA	NA	NA	NA	NA
	TRINITY_DN42758_c1_g1	-8.61327	4.89e-07	7.87e-06	DOWN	TRINITY_DN42758_c1_g1	TraesCS7A01G219700.1	621	893	1920	1.64e-140	TraesCS7A01G219700	chr7A	187430294	187433245	BURP domain protein RD22
	TRINITY_DN119572_c0_g1	-8.61291	4.65e-07	7.52e-06	DOWN	NA	NA	NA	NA	NA	NA	NA	NA	NA	NA	NA
	TRINITY_DN117532_c0_g2	-8.60615	7.36e-07	1.13e-05	DOWN	TRINITY_DN117532_c0_g2	TraesCS7A01G010400.1	1164	1299	2268	2.21e-64	TraesCS7A01G010400	chr7A	4742484	4744971	Protein TolB
	TRINITY_DN4898_c0_g1	-8.6057	2.8e-11	1.09e-09	DOWN	TRINITY_DN4898_c0_g1	TraesCS1D01G286800.1	1	185	1308	3.77e-91	TraesCS1D01G286800	chr1D	384977101	384978998	Kinase family protein
	TRINITY_DN11533_c0_g1	-8.59983	1.54e-06	2.17e-05	DOWN	TRINITY_DN11533_c0_g1	TraesCS7A01G227700.1	1	207	207	4.91e-95	TraesCS7A01G227700	chr7A	198190620	198191436	Pollen-specific arabinogalacta protein BAN102
	TRINITY_DN82443_c0_g1	-8.59775	3.2e-07	5.42e-06	DOWN	TRINITY_DN82443_c0_g1	TraesCS6B01G428600.1	1521	1727	3027	1.27e-105	TraesCS6B01G428600	chr6B	696636643	696640984	methyl-coenzyme M reductase II subunit gamma, putative (DUF3741)
	TRINITY_DN74068_c0_g3	-8.59304	5.87e-07	9.24e-06	DOWN	TRINITY_DN74068_c0_g3	TraesCS2A01G552400.1	141	368	1032	1.39e-115	TraesCS2A01G552400	chr2A	758509544	758511071	MYB transcription factor
	TRINITY_DN5225_c2_g2	-8.59072	8.39e-09	2.04e-07	DOWN	TRINITY_DN5225_c2_g2	TraesCS4A01G171100.1	1	803	1935	0	TraesCS4A01G171100	chr4A	432534500	432536922	Plant invertase/pectin methylesterase inhibitor superfamily protein
	TRINITY_DN23345_c0_g1	-8.59049	5.11e-06	6.29e-05	DOWN	TRINITY_DN23345_c0_g1	TraesCS1D01G375700.1	1271	1326	1497	2.44e-21	TraesCS1D01G375700	chr1D	452478276	452483082	Methyltransferase
	TRINITY_DN36181_c0_g2	-8.59047	7.85e-06	9.17e-05	DOWN	TRINITY_DN36181_c0_g2	TraesCS4B01G282700.1	2010	2049	2049	1.18e-12	TraesCS4B01G282700	chr4B	565987200	565993914	Amine oxidase
	TRINITY_DN1673_c0_g2	-8.58663	5.64e-08	1.15e-06	DOWN	TRINITY_DN1673_c0_g2	TraesCS4A01G287600.1	157	771	798	0	TraesCS4A01G287600	chr4A	592926089	592927358	Pollen allergen Phl p 5
	TRINITY_DN20664_c0_g2	-8.5865	5.2e-06	6.37e-05	DOWN	TRINITY_DN20664_c0_g2	TraesCS7A01G111000.1	1476	1685	2856	1.3e-100	TraesCS7A01G111000	chr7A	68029184	68032394	NBS-LRR-like resistance protein
	TRINITY_DN73924_c0_g1	-8.5865	5.2e-06	6.37e-05	DOWN	TRINITY_DN73924_c0_g1	TraesCS4A01G333200.1	113	177	375	1.86e-24	TraesCS4A01G333200	chr4A	616961344	616961814	Basic blue protein, putative
	TRINITY_DN107703_c0_g1	-8.58253	3.62e-06	4.61e-05	DOWN	NA	NA	NA	NA	NA	NA	NA	NA	NA	NA	NA
	TRINITY_DN31511_c0_g1	-8.57972	7.46e-07	1.14e-05	DOWN	TRINITY_DN31511_c0_g1	TraesCS4D01G019500.1	528	805	2184	6.07e-140	TraesCS4D01G019500	chr4D	8256219	8259444	Endo-1,4-beta-xylanase, putative, expressed
	TRINITY_DN53714_c0_g1	-8.57909	2.3e-07	4.05e-06	DOWN	NA	NA	NA	NA	NA	NA	NA	NA	NA	NA	NA
	TRINITY_DN70832_c0_g1	-8.57844	1.62e-06	2.27e-05	DOWN	NA	NA	NA	NA	NA	NA	NA	NA	NA	NA	NA
	TRINITY_DN26511_c1_g1	-8.57151	4.39e-06	5.48e-05	DOWN	TRINITY_DN26511_c1_g1	TraesCS2D01G041900.1	1180	1345	1404	4.04e-76	TraesCS2D01G041900	chr2D	14970632	14972035	HXXXD-type acyl-transferase family protein
	TRINITY_DN41388_c3_g1	-8.57138	1.02e-06	1.51e-05	DOWN	TRINITY_DN41388_c3_g1	TraesCS3A01G360000.1	244	354	540	1.98e-45	TraesCS3A01G360000	chr3A	608093403	608095258	Protein FAR1-RELATED SEQUENCE 5
	TRINITY_DN144017_c0_g1	-8.56907	7.49e-07	1.14e-05	DOWN	NA	NA	NA	NA	NA	NA	NA	NA	NA	NA	NA
	TRINITY_DN14332_c0_g1	-8.56215	4.19e-10	1.32e-08	DOWN	TRINITY_DN14332_c0_g1	TraesCS1A01G231600.1	1	546	546	0	TraesCS1A01G231600	chr1A	405007786	405008873	Pectinesterase inhibitor
	TRINITY_DN60092_c0_g1	-8.55434	2.91e-06	3.79e-05	DOWN	TRINITY_DN60092_c0_g1	TraesCS4A01G431300.1	109	338	990	1.12e-96	TraesCS4A01G431300	chr4A	702044351	702046457	Acid phosphatase 1
	TRINITY_DN12287_c1_g2	-8.5542	2.07e-06	2.82e-05	DOWN	NA	NA	NA	NA	NA	NA	NA	NA	NA	NA	NA
	TRINITY_DN126045_c0_g1	-8.55291	2.42e-07	4.23e-06	DOWN	NA	NA	NA	NA	NA	NA	NA	NA	NA	NA	NA
	TRINITY_DN40367_c0_g1	-8.54814	4.35e-06	5.45e-05	DOWN	TRINITY_DN40367_c0_g1	TraesCS7A01G427600.1	453	520	870	1.27e-26	TraesCS7A01G427600	chr7A	620749363	620750448	Xyloglucan endotransglucosylase/hydrolase
	TRINITY_DN33015_c0_g1	-8.54406	6.92e-06	8.22e-05	DOWN	TRINITY_DN33015_c0_g1	TraesCS5B01G235800.1	1118	882	1209	1.44e-120	TraesCS5B01G235800	chr5B	416389892	416391215	Acyl-[acyl-carrier-protein] desaturase
	TRINITY_DN28705_c2_g1	-8.54106	2.93e-06	3.81e-05	DOWN	TRINITY_DN28705_c2_g1	TraesCS3B01G081300.1	706	907	1425	7.41e-103	TraesCS3B01G081300	chr3B	51229477	51230901	NBS-LRR disease resistance protein
	TRINITY_DN6079_c0_g1	-8.53907	6.17e-11	2.26e-09	DOWN	TRINITY_DN6079_c0_g1	TraesCS3A01G004300.1	65	249	249	7.45e-88	TraesCS3A01G004300	chr3A	2604526	2604896	Glutamate--cysteine ligase
	TRINITY_DN60730_c0_g1	-8.53835	3.2e-07	5.41e-06	DOWN	NA	NA	NA	NA	NA	NA	NA	NA	NA	NA	NA
	TRINITY_DN2848_c0_g1	-8.53835	6.22e-08	1.25e-06	DOWN	TRINITY_DN2848_c0_g1	TraesCS3A01G349300.1	1	243	243	5.18e-120	TraesCS3A01G349300	chr3A	597931315	597931661	Defensin
	TRINITY_DN50107_c0_g1	-8.53825	6.34e-07	9.88e-06	DOWN	TRINITY_DN50107_c0_g1	TraesCS1A01G420800.1	1569	1623	1623	4.1e-21	TraesCS1A01G420800	chr1A	577307679	577313832	CAS1 domain-containing protein 1
	TRINITY_DN63516_c0_g1	-8.53825	6.34e-07	9.88e-06	DOWN	NA	NA	NA	NA	NA	NA	NA	NA	NA	NA	NA
	TRINITY_DN117532_c1_g1	-8.53699	1.94e-06	2.66e-05	DOWN	TRINITY_DN117532_c1_g1	TraesCS4A01G484600.1	711	960	2352	4.29e-116	TraesCS4A01G484600	chr4A	738781116	738784525	Protein TolB
	TRINITY_DN30772_c0_g3	-8.53365	1.72e-06	2.39e-05	DOWN	TRINITY_DN30772_c0_g3	TraesCS2D01G061100.1	1	150	636	7.6e-74	TraesCS2D01G061100	chr2D	25204654	25205584	Proline-rich protein, putative, expressed
	TRINITY_DN62351_c0_g1	-8.53024	3.49e-07	5.86e-06	DOWN	TRINITY_DN62351_c0_g1	TraesCS3D01G095300.1	678	736	981	5.28e-23	TraesCS3D01G095300	chr3D	48405249	48406547	Alpha/beta-hydrolase superfamily protein
	TRINITY_DN116777_c0_g1	-8.52631	1.07e-06	1.58e-05	DOWN	TRINITY_DN116777_c0_g1	TraesCS6B01G373100.1	623	669	669	1.16e-16	TraesCS6B01G373100	chr6B	646258156	646261118	Very-long-chain (3R)-3-hydroxyacyl-CoA dehydratase
	TRINITY_DN159888_c0_g1	-8.52385	1.08e-06	1.59e-05	DOWN	TRINITY_DN159888_c0_g1	TraesCS1A01G034600.1	688	897	1329	9.97e-102	TraesCS1A01G034600	chr1A	17246803	17248425	Lecithin-cholesterol acyltransferase-like 1
	TRINITY_DN7225_c0_g1	-8.52016	7.51e-06	8.81e-05	DOWN	TRINITY_DN7225_c0_g1	TraesCS2A01G505100.1	1	234	234	4.31e-120	TraesCS2A01G505100	chr2A	733579702	733580228	Phytochrome C
	TRINITY_DN12756_c1_g1	-8.51606	3.43e-06	4.39e-05	DOWN	TRINITY_DN12756_c1_g1	TraesCS1D01G039400.1	1704	1999	2124	3.02e-133	TraesCS1D01G039400	chr1D	19012331	19020800	Phenylalanine ammonia-lyase
	TRINITY_DN118406_c0_g1	-8.51393	1.36e-06	1.95e-05	DOWN	TRINITY_DN118406_c0_g1	TraesCS3B01G193000.1	288	355	384	2.52e-28	TraesCS3B01G193000	chr3B	207304119	207304834	Acyl-protein thioesterase 2
	TRINITY_DN33365_c1_g1	-8.51129	6.64e-07	1.03e-05	DOWN	TRINITY_DN33365_c1_g1	TraesCS1A01G017900.1	1	178	2082	2.02e-74	TraesCS1A01G017900	chr1A	9355372	9357968	Receptor-like kinase
	TRINITY_DN41964_c0_g1	-8.50982	6.86e-06	8.16e-05	DOWN	TRINITY_DN41964_c0_g1	TraesCS1B01G445300.1	51	308	1815	7.1e-109	TraesCS1B01G445300	chr1B	665397447	665402187	Mitogen-activated protein kinase
	TRINITY_DN89895_c0_g1	-8.50925	5.6e-07	8.84e-06	DOWN	TRINITY_DN89895_c0_g1	TraesCS1D01G415300.1	1	108	606	1.55e-50	TraesCS1D01G415300	chr1D	474753408	474754013	DUF1645 family protein
	TRINITY_DN2283_c1_g1	-8.50389	3.42e-07	5.76e-06	DOWN	NA	NA	NA	NA	NA	NA	NA	NA	NA	NA	NA
	TRINITY_DN34615_c0_g1	-8.50119	1.31e-06	1.88e-05	DOWN	TRINITY_DN34615_c0_g1	TraesCS3D01G264400.1	479	561	561	5.28e-35	TraesCS3D01G264400	chr3D	366014637	366015197	DUF4228 domain protein
	TRINITY_DN28236_c1_g1	-8.50031	1.47e-06	2.09e-05	DOWN	NA	NA	NA	NA	NA	NA	NA	NA	NA	NA	NA
	TRINITY_DN30848_c0_g1	-8.49777	6.05e-07	9.5e-06	DOWN	TRINITY_DN30848_c0_g1	TraesCS5A01G380600.2	1	115	2979	3.83e-51	TraesCS5A01G380600	chr5A	577950969	577963021	Vacuolar sorting-associated protein 18-like protein
	TRINITY_DN114510_c0_g1	-8.49627	1.91e-06	2.63e-05	DOWN	TRINITY_DN114510_c0_g1	TraesCS1A01G008100.1	2362	2624	4242	2.79e-108	TraesCS1A01G008100	chr1A	4497769	4502210	Powdery mildew resistance protein
	TRINITY_DN50867_c0_g1	-8.49495	2.68e-06	3.52e-05	DOWN	NA	NA	NA	NA	NA	NA	NA	NA	NA	NA	NA
	TRINITY_DN36905_c0_g1	-8.49466	1.37e-06	1.96e-05	DOWN	TRINITY_DN36905_c0_g1	TraesCS4A01G287300.1	1	113	1677	2.25e-53	TraesCS4A01G287300	chr4A	592543631	592547201	Peptide transporter
	TRINITY_DN28366_c3_g1	-8.48951	1.34e-06	1.92e-05	DOWN	NA	NA	NA	NA	NA	NA	NA	NA	NA	NA	NA
	TRINITY_DN36558_c0_g2	-8.48898	1.44e-06	2.04e-05	DOWN	NA	NA	NA	NA	NA	NA	NA	NA	NA	NA	NA
	TRINITY_DN41230_c1_g1	-8.48457	2.34e-06	3.13e-05	DOWN	NA	NA	NA	NA	NA	NA	NA	NA	NA	NA	NA
	TRINITY_DN7784_c0_g1	-8.47968	1.11e-05	0.000124019	DOWN	TRINITY_DN7784_c0_g1	TraesCSU01G253600.1	100	467	813	0	TraesCSU01G253600	chrUn	390478681	390479493	Pollen allergen Phl p 5
	TRINITY_DN34944_c0_g3	-8.47631	5.15e-07	8.23e-06	DOWN	NA	NA	NA	NA	NA	NA	NA	NA	NA	NA	NA
	TRINITY_DN880_c0_g2	-8.47512	1.58e-06	2.22e-05	DOWN	TRINITY_DN880_c0_g2	TraesCS3B01G120700.1	200	1	786	1.13e-96	TraesCS3B01G120700	chr3B	90858264	90859049	Fasciclin-like arabinogalactan protein
	TRINITY_DN35274_c0_g1	-8.47349	3.45e-07	5.79e-06	DOWN	TRINITY_DN35274_c0_g1	TraesCS4B01G211300.1	1	29	1341	1.1e-06	TraesCS4B01G211300	chr4B	449645498	449648425	lipase, putative (DUF620)
	TRINITY_DN39484_c0_g2	-8.47215	7.31e-07	1.12e-05	DOWN	NA	NA	NA	NA	NA	NA	NA	NA	NA	NA	NA
	TRINITY_DN122572_c3_g1	-8.47157	9.71e-06	0.000110541	DOWN	TRINITY_DN122572_c3_g1	TraesCS1B01G007400.2	1725	1971	3396	2.06e-84	TraesCS1B01G007400	chr1B	4150758	4154324	Receptor protein kinase, putative
	TRINITY_DN67433_c0_g1	-8.46781	5.77e-07	9.09e-06	DOWN	TRINITY_DN67433_c0_g1	TraesCS5A01G036000.1	1693	1804	2229	2.22e-49	TraesCS5A01G036000	chr5A	33004516	33009262	Subtilisin-like protease
	TRINITY_DN66039_c0_g2	-8.46441	5.39e-07	8.56e-06	DOWN	NA	NA	NA	NA	NA	NA	NA	NA	NA	NA	NA
	TRINITY_DN7333_c6_g1	-8.46298	4.43e-06	5.53e-05	DOWN	TRINITY_DN7333_c6_g1	TraesCS6B01G359700.1	1	35	354	6.04e-10	TraesCS6B01G359700	chr6B	631534462	631534815	SAUR-like auxin-responsive family protein
	TRINITY_DN112671_c0_g1	-8.46022	7.58e-07	1.16e-05	DOWN	NA	NA	NA	NA	NA	NA	NA	NA	NA	NA	NA
	TRINITY_DN29130_c0_g3	-8.45948	2.68e-06	3.52e-05	DOWN	NA	NA	NA	NA	NA	NA	NA	NA	NA	NA	NA
	TRINITY_DN12098_c0_g1	-8.45701	1.76e-06	2.45e-05	DOWN	TRINITY_DN12098_c0_g1	TraesCS3A01G294600.1	53	171	1173	1.47e-56	TraesCS3A01G294600	chr3A	528555337	528556687	Interactor of constitutive active ROPs protein, putative
	TRINITY_DN44930_c0_g1	-8.45494	1.81e-06	2.51e-05	DOWN	NA	NA	NA	NA	NA	NA	NA	NA	NA	NA	NA
	TRINITY_DN77420_c0_g1	-8.45316	6.42e-06	7.7e-05	DOWN	TRINITY_DN77420_c0_g1	TraesCS6A01G008400.1	1449	1510	2736	5.49e-25	TraesCS6A01G008400	chr6A	3351576	3359760	Receptor-like protein kinase
	TRINITY_DN11936_c0_g1	-8.45068	2.3e-11	9.13e-10	DOWN	TRINITY_DN11936_c0_g1	TraesCS7B01G392000.1	74	2001	2001	0	TraesCS7B01G392000	chr7B	658281516	658293443	Receptor-like protein kinase
	TRINITY_DN30864_c0_g3	-8.44961	2.07e-06	2.81e-05	DOWN	NA	NA	NA	NA	NA	NA	NA	NA	NA	NA	NA
	TRINITY_DN57272_c0_g1	-8.44909	1.84e-06	2.54e-05	DOWN	TRINITY_DN57272_c0_g1	TraesCS2B01G416400.1	51	258	1287	7.66e-103	TraesCS2B01G416400	chr2B	595125454	595126740	Fasciclin-like arabinogalactan protein
	TRINITY_DN50771_c0_g1	-8.44746	2.74e-06	3.59e-05	DOWN	TRINITY_DN50771_c0_g1	TraesCS1B01G384600.1	394	521	3150	1.4e-61	TraesCS1B01G384600	chr1B	617823969	617830653	Regulator of chromosome condensation (RCC1) family protein
	TRINITY_DN64357_c0_g3	-8.44701	1.95e-06	2.67e-05	DOWN	NA	NA	NA	NA	NA	NA	NA	NA	NA	NA	NA
	TRINITY_DN1486_c3_g3	-8.44452	4.21e-07	6.88e-06	DOWN	NA	NA	NA	NA	NA	NA	NA	NA	NA	NA	NA
	TRINITY_DN17511_c1_g3	-8.43392	9.17e-07	1.37e-05	DOWN	TRINITY_DN17511_c1_g3	TraesCS5B01G456200.1	133	469	552	1.58e-167	TraesCS5B01G456200	chr5B	631380986	631381537	Glutamate--tRNA ligase
	TRINITY_DN57544_c0_g1	-8.43392	9.17e-07	1.37e-05	DOWN	NA	NA	NA	NA	NA	NA	NA	NA	NA	NA	NA
	TRINITY_DN8229_c0_g2	-8.43319	9.63e-16	7.49e-14	DOWN	TRINITY_DN8229_c0_g2	TraesCS3A01G326400.1	1	1335	1335	0	TraesCS3A01G326400	chr3A	571790351	571792045	Protein kinase
	TRINITY_DN80458_c0_g5	-8.43097	4.37e-06	5.46e-05	DOWN	TRINITY_DN80458_c0_g5	TraesCS7B01G427800.1	3355	3646	4485	5.19e-106	TraesCS7B01G427800	chr7B	697073102	697081669	Receptor-like protein kinase
	TRINITY_DN85261_c0_g1	-8.43097	4.37e-06	5.46e-05	DOWN	TRINITY_DN85261_c0_g1	TraesCS6D01G361300.1	274	315	315	5.16e-12	TraesCS6D01G361300	chr6D	452476861	452477261	Non-specific lipid-transfer protein
	TRINITY_DN23278_c0_g1	-8.42658	6.9e-06	8.19e-05	DOWN	NA	NA	NA	NA	NA	NA	NA	NA	NA	NA	NA
	TRINITY_DN67715_c0_g2	-8.42658	6.9e-06	8.19e-05	DOWN	NA	NA	NA	NA	NA	NA	NA	NA	NA	NA	NA
	TRINITY_DN71072_c0_g1	-8.42658	6.9e-06	8.19e-05	DOWN	NA	NA	NA	NA	NA	NA	NA	NA	NA	NA	NA
	TRINITY_DN48573_c0_g1	-8.42219	4.02e-07	6.63e-06	DOWN	TRINITY_DN48573_c0_g1	TraesCS3B01G439800.1	1967	2104	2379	5.28e-67	TraesCS3B01G439800	chr3B	679197614	679201680	S-adenosyl-L-methionine-dependent methyltransferases superfamily protein
	TRINITY_DN82210_c0_g2	-8.42167	9.52e-07	1.42e-05	DOWN	TRINITY_DN82210_c0_g2	TraesCS1B01G433700.1	53	112	297	6.82e-24	TraesCS1B01G433700	chr1B	658447078	658447502	B12D protein
	TRINITY_DN94913_c0_g1	-8.42087	5.06e-07	8.11e-06	DOWN	NA	NA	NA	NA	NA	NA	NA	NA	NA	NA	NA
	TRINITY_DN94069_c0_g1	-8.4193	1.18e-06	1.72e-05	DOWN	TRINITY_DN94069_c0_g1	TraesCS2A01G102300.4	2026	2090	2145	1.17e-26	TraesCS2A01G102300	chr2A	55850493	55854664	RNA-binding domain CCCH-type zinc finger protein
	TRINITY_DN178695_c0_g1	-8.41497	8.49e-07	1.28e-05	DOWN	NA	NA	NA	NA	NA	NA	NA	NA	NA	NA	NA
	TRINITY_DN16634_c2_g1	-8.41429	7.02e-06	8.32e-05	DOWN	TRINITY_DN16634_c2_g1	TraesCS4B01G340100.1	497	735	963	1.14e-116	TraesCS4B01G340100	chr4B	633398970	633400094	Peroxidase
	TRINITY_DN34125_c1_g3	-8.41429	7.02e-06	8.32e-05	DOWN	NA	NA	NA	NA	NA	NA	NA	NA	NA	NA	NA
	TRINITY_DN83444_c0_g1	-8.40807	3.69e-07	6.14e-06	DOWN	TRINITY_DN83444_c0_g1	TraesCS7B01G202900.1	885	926	1878	7.02e-14	TraesCS7B01G202900	chr7B	372046339	372048845	XH/XS domain protein
	TRINITY_DN52891_c0_g1	-8.40774	5.39e-06	6.59e-05	DOWN	TRINITY_DN52891_c0_g1	TraesCS3D01G513500.1	2203	2412	2700	2.77e-107	TraesCS3D01G513500	chr3D	597485537	597490475	Disease resistance protein RPP13
	TRINITY_DN1922_c6_g1	-8.40633	5.38e-07	8.54e-06	DOWN	NA	NA	NA	NA	NA	NA	NA	NA	NA	NA	NA
	TRINITY_DN37756_c3_g1	-8.40633	5.38e-07	8.54e-06	DOWN	NA	NA	NA	NA	NA	NA	NA	NA	NA	NA	NA
	TRINITY_DN32019_c0_g1	-8.40553	5.35e-07	8.51e-06	DOWN	TRINITY_DN32019_c0_g1	TraesCS3B01G393800.1	40	244	1875	1.66e-89	TraesCS3B01G393800	chr3B	620454101	620455975	Nodulin-like / Major Facilitator Superfamily protein
	TRINITY_DN77851_c0_g1	-8.40107	2.94e-06	3.82e-05	DOWN	NA	NA	NA	NA	NA	NA	NA	NA	NA	NA	NA
	TRINITY_DN69202_c0_g2	-8.39465	1.23e-06	1.79e-05	DOWN	NA	NA	NA	NA	NA	NA	NA	NA	NA	NA	NA
	TRINITY_DN95211_c0_g1	-8.39465	1.23e-06	1.79e-05	DOWN	TRINITY_DN95211_c0_g1	TraesCS1B01G048300.1	1464	1678	2142	1.02e-106	TraesCS1B01G048300	chr1B	28373463	28375862	Phenylalanine ammonia-lyase
	TRINITY_DN64907_c0_g2	-8.39245	1.49e-06	2.1e-05	DOWN	TRINITY_DN64907_c0_g2	TraesCS4D01G006500.1	481	612	612	1.62e-37	TraesCS4D01G006500	chr4D	3427774	3428509	Dirigent protein
	TRINITY_DN2048_c4_g1	-8.39126	2.61e-06	3.45e-05	DOWN	TRINITY_DN2048_c4_g1	TraesCS5A01G138300.1	646	1626	1626	0	TraesCS5A01G138300	chr5A	310872901	310875109	Calcium-dependent protein kinase
	TRINITY_DN30961_c1_g1	-8.39125	4.17e-07	6.83e-06	DOWN	TRINITY_DN30961_c1_g1	TraesCS2B01G497500.1	36	255	2328	1.74e-109	TraesCS2B01G497500	chr2B	694054407	694060937	Homeobox-leucine zipper family protein
	TRINITY_DN45013_c0_g5	-8.38712	8.68e-06	0.000100133	DOWN	NA	NA	NA	NA	NA	NA	NA	NA	NA	NA	NA
	TRINITY_DN85069_c0_g3	-8.38712	8.68e-06	0.000100133	DOWN	NA	NA	NA	NA	NA	NA	NA	NA	NA	NA	NA
	TRINITY_DN192544_c0_g1	-8.38692	4.47e-07	7.25e-06	DOWN	NA	NA	NA	NA	NA	NA	NA	NA	NA	NA	NA
[truncated: 4,219 more rows]

## Sheet: GO Analysis_Upregulated
	Insight into the mechanisms of terminal HS-tolerance in wheat mutant with improved nutritional quality through de novo transcriptome sequencing Ranjeet R. Kumar, Suman Bakshi, Kavita Dubey, Sumedha Hasija, Gyanendra K. Rai, Neelu Jain, Sanjay Jambhulkar, Bhupinder Singh, Gyanendra P. Singh, & Shelly Praveen
[truncated: 9,086 more rows]

[truncated: 1 more sheets: GO Analysis_Downregulated]
