# Supplementary material for: Insight into the mechanisms of terminal HS-tolerance in wheat mutant with improved nutritional quality through de novo transcriptome sequencing
Source: Research Square preprint supplement (doi:10.21203/rs.3.rs-241832/v1), 2021-02-26
Supplement: Supplementary file 5 [file 3c024bcfb21f9f018a053965.xlsx]

## Sheet: Sheet1
			Insight into the mechanisms of terminal HS-tolerance in wheat mutant with improved nutritional quality through de novo transcriptome sequencing Ranjeet R. Kumar, Suman Bakshi, Kavita Dubey, Sumedha Hasija, Gyanendra K. Rai, Neelu Jain, Sanjay Jambhulkar, Bhupinder Singh, Gyanendra P. Singh, & Shelly Praveen
			Table S11 List of differentially expressed transcripts involved in photosynthesis in wheat mutant identified through de novo transcriptomic sequencing using Illumina Hiseq 4000
			Trinity_GeneID	logFC	PValue	FDR	Wheat_Transcript_ID	Transcript_Start	Transcript_End	Transcript length	E value	Wheat_Gene_ID	Chromosome	Gene_Start	Gene_End	Description/Protein Name
			TRINITY_DN17369_c0_g1	10.3431	1.18e-14	5.31e-13	TraesCS1B01G409300.1	1	176	582	1.21e-86	TraesCS1B01G409300	chr1B	636753327	636754505	Photosynthetic NDH subcomplex B 3
			TRINITY_DN20770_c1_g1	10.2757	5.46e-18	4.06e-16	TraesCS3D01G274200.1	808	966	966	3.35e-65	TraesCS3D01G274200	chr3D	380123760	380131949	L-ribulose-5-phosphate 3-epimerase UlaE
			TRINITY_DN119081_c0_g2	10.001	6.97e-11	1.59e-09	TraesCS2D01G253900.2	381	271	522	3.15e-52	TraesCS2D01G253900	chr2D	306252039	306252983	Photosystem II 10 kDa polypeptide family protein
			TRINITY_DN11423_c2_g1	9.73689	2.61e-13	9.57e-12	TraesCS7B01G170700.1	39	1	525	4.43e-12	TraesCS7B01G170700	chr7B	242910585	242911109	Photosystem II reaction center PsbP family protein
			TRINITY_DN114153_c0_g1	9.65958	9.12e-12	2.48e-10	TraesCS3D01G053400.1	780	584	1158	1.55e-96	TraesCS3D01G053400	chr3D	21903938	21905358	Photosystem II CP47 reaction center protein
			TRINITY_DN30380_c1_g1	9.6154	2.4e-10	7.86e-09	TraesCS4B01G140200.1	265	488	1299	5.02e-100	TraesCS4B01G140200	chr4B	184603376	184606429	Ribulose bisphosphate carboxylase/oxygenase activase
			TRINITY_DN115071_c0_g1	9.33214	1.49e-08	2.07e-07	TraesCS1A01G383200.1	454	508	543	4.01e-21	TraesCS1A01G383200	chr1A	553983341	553984443	Photosynthetic NDH subcomplex B 3
			TRINITY_DN75263_c0_g1	9.31095	2.37e-12	7.21e-11	TraesCS2B01G487400.1	577	704	2205	3.77e-42	TraesCS2B01G487400	chr2B	683731820	683734978	Photosystem I P700 chlorophyll a apoprotein A2
			TRINITY_DN52424_c0_g3	9.17645	3.07e-11	7.54e-10	TraesCS6A01G374400.1	157	213	414	4.01e-22	TraesCS6A01G374400	chr6A	597284952	597286073	Photosystem II 10 kDa polypeptide family protein
			TRINITY_DN119081_c0_g1	8.78004	7.12e-40	8.42e-37	TraesCS2B01G272900.1	518	697	786	9.78e-89	TraesCS2B01G272900	chr2B	374207787	374209500	Photosystem II 10 kDa polypeptide family protein
			TRINITY_DN2463_c0_g2	8.5852	2.44e-08	3.2e-07	TraesCS2B01G372700.1	616	524	819	1.85e-40	TraesCS2B01G372700	chr2B	531135183	531136396	Photosystem II reaction center PsbP family protein
			TRINITY_DN21223_c0_g1	7.93588	2e-33	8.72e-31	TraesCS4A01G177500.1	36	143	1395	9.06e-49	TraesCS4A01G177500	chr4A	449266176	449268195	Ribulose bisphosphate carboxylase/oxygenase activase
			TRINITY_DN30380_c2_g1	7.58236	2.56e-07	2.57e-06	TraesCS4B01G140200.1	694	489	1299	3.19e-97	TraesCS4B01G140200	chr4B	184603376	184606429	Ribulose bisphosphate carboxylase/oxygenase activase
			TRINITY_DN30380_c2_g1	7.49737	1.35e-22	2.26e-20	TraesCS4B01G140200.1	694	489	1299	3.19e-97	TraesCS4B01G140200	chr4B	184603376	184606429	Ribulose bisphosphate carboxylase/oxygenase activase
			TRINITY_DN13450_c0_g1	7.30704	3.58e-08	4.5e-07	TraesCS4B01G140200.1	711	947	1299	3.1e-122	TraesCS4B01G140200	chr4B	184603376	184606429	Ribulose bisphosphate carboxylase/oxygenase activase
			TRINITY_DN11_c0_g1	7.25579	1.01e-15	7.85e-14	TraesCS4B01G140200.2	29	270	1293	6.11e-119	TraesCS4B01G140200	chr4B	184603376	184606429	Ribulose bisphosphate carboxylase/oxygenase activase
			TRINITY_DN13450_c0_g1	7.01935	7.37e-15	5.11e-13	TraesCS4B01G140200.1	711	947	1299	3.1e-122	TraesCS4B01G140200	chr4B	184603376	184606429	Ribulose bisphosphate carboxylase/oxygenase activase
			TRINITY_DN21223_c0_g1	6.72173	8.79e-07	7.66e-06	TraesCS4A01G177500.1	36	143	1395	9.06e-49	TraesCS4A01G177500	chr4A	449266176	449268195	Ribulose bisphosphate carboxylase/oxygenase activase
			TRINITY_DN13450_c0_g2	6.62221	2.12e-06	1.69e-05	TraesCS4D01G134900.1	782	1063	1299	7.86e-144	TraesCS4D01G134900	chr4D	121811802	121814973	Ribulose bisphosphate carboxylase/oxygenase activase
			TRINITY_DN11_c0_g1	6.35803	0.000139023	0.000753445	TraesCS4B01G140200.2	29	270	1293	6.11e-119	TraesCS4B01G140200	chr4B	184603376	184606429	Ribulose bisphosphate carboxylase/oxygenase activase
			TRINITY_DN15014_c1_g2	5.42073	2.39e-07	2.41e-06	TraesCS3A01G123900.1	880	1032	1383	4.22e-40	TraesCS3A01G123900	chr3A	100014998	100019026	Phototropic-responsive NPH3 family protein
			TRINITY_DN13450_c0_g2	5.11938	4.73e-10	1.47e-08	TraesCS4D01G134900.1	782	1063	1299	7.86e-144	TraesCS4D01G134900	chr4D	121811802	121814973	Ribulose bisphosphate carboxylase/oxygenase activase
			TRINITY_DN11423_c0_g2	5.03912	7.54e-06	5.24e-05	TraesCS7B01G170700.1	525	239	525	8.86e-145	TraesCS7B01G170700	chr7B	242910585	242911109	Photosystem II reaction center PsbP family protein
			TRINITY_DN15872_c0_g1	4.98153	1.48e-10	3.16e-09	TraesCS3B01G173700.1	234	11	234	9.45e-110	TraesCS3B01G173700	chr3B	173944043	173944276	Photosystem I reaction center subunit IV
			TRINITY_DN14784_c0_g2	4.8976	6.72e-07	6.03e-06	TraesCS1D01G181100.1	1121	1034	2202	1.21e-28	TraesCS1D01G181100	chr1D	254463783	254465986	Photosystem I P700 chlorophyll a apoprotein A2
			TRINITY_DN3333_c1_g1	4.70889	2.07e-05	0.000130243	TraesCS2B01G272900.1	101	461	786	0	TraesCS2B01G272900	chr2B	374207787	374209500	Photosystem II 10 kDa polypeptide family protein
			TRINITY_DN15872_c0_g1	4.4763	1.58e-06	2.22e-05	TraesCS3B01G173700.1	234	11	234	9.45e-110	TraesCS3B01G173700	chr3B	173944043	173944276	Photosystem I reaction center subunit IV
			TRINITY_DN30380_c1_g1	4.36403	0.00283268	0.0110213	TraesCS4B01G140200.1	265	488	1299	5.02e-100	TraesCS4B01G140200	chr4B	184603376	184606429	Ribulose bisphosphate carboxylase/oxygenase activase
			TRINITY_DN30380_c0_g1	4.3594	1.05e-10	2.31e-09	TraesCS4B01G140300.1	437	524	1395	3.49e-39	TraesCS4B01G140300	chr4B	184607712	184609757	Ribulose bisphosphate carboxylase/oxygenase activase
			TRINITY_DN44228_c0_g1	4.29275	0.00207996	0.0124149	TraesCS7D01G159800.1	561	625	2481	1.37e-26	TraesCS7D01G159800	chr7D	109171105	109175167	Sucrose synthase
			TRINITY_DN52424_c0_g1	4.27195	7.56e-08	8.71e-07	TraesCS6B01G412100.1	160	220	423	7.33e-24	TraesCS6B01G412100	chr6B	685636044	685636931	Photosystem II 10 kDa polypeptide family protein
			TRINITY_DN82168_c0_g1	4.23893	0.00584235	0.0292345	TraesCS1D01G181100.1	1742	1602	2202	7.11e-48	TraesCS1D01G181100	chr1D	254463783	254465986	Photosystem I P700 chlorophyll a apoprotein A2
			TRINITY_DN50041_c0_g1	4.18491	0.00180384	0.0110284	TraesCS7D01G159800.1	2241	2370	2481	4.97e-61	TraesCS7D01G159800	chr7D	109171105	109175167	Sucrose synthase
			TRINITY_DN11423_c0_g1	4.03296	4.33e-05	0.000257451	TraesCS7B01G170700.1	18	525	525	0	TraesCS7B01G170700	chr7B	242910585	242911109	Photosystem II reaction center PsbP family protein
			TRINITY_DN52424_c0_g2	3.99584	0.00227205	0.00910485	TraesCS6B01G412100.1	330	138	423	4.43e-96	TraesCS6B01G412100	chr6B	685636044	685636931	Photosystem II 10 kDa polypeptide family protein
			TRINITY_DN43336_c0_g1	3.80534	2.56e-07	4.44e-06	TraesCS5D01G010000.1	1	558	558	0	TraesCS5D01G010000	chr5D	6212311	6216651	Photosystem I assembly protein Ycf4
			TRINITY_DN18557_c0_g1	3.66508	2.14e-05	0.000134029	TraesCS3D01G274200.1	921	966	966	5.16e-16	TraesCS3D01G274200	chr3D	380123760	380131949	L-ribulose-5-phosphate 3-epimerase UlaE
			TRINITY_DN75263_c0_g1	3.62367	1.13e-07	2.15e-06	TraesCS2B01G487400.1	577	704	2205	3.77e-42	TraesCS2B01G487400	chr2B	683731820	683734978	Photosystem I P700 chlorophyll a apoprotein A2
			TRINITY_DN18013_c0_g1	3.60996	8.62e-09	1.27e-07	TraesCS4A01G177500.1	939	997	1395	2.32e-23	TraesCS4A01G177500	chr4A	449266176	449268195	Ribulose bisphosphate carboxylase/oxygenase activase
			TRINITY_DN58380_c0_g1	3.59222	2.11e-06	1.69e-05	TraesCS7A01G291000.1	631	682	789	1.07e-18	TraesCS7A01G291000	chr7A	353200980	353244515	acclimation of photosynthesis to environment
			TRINITY_DN52424_c0_g3	3.57841	4.2e-07	6.87e-06	TraesCS6A01G374400.1	157	213	414	4.01e-22	TraesCS6A01G374400	chr6A	597284952	597286073	Photosystem II 10 kDa polypeptide family protein
			TRINITY_DN16617_c0_g1	3.45318	2.86e-12	8.56e-11	TraesCS1D01G181100.1	1742	1680	2202	3.82e-15	TraesCS1D01G181100	chr1D	254463783	254465986	Photosystem I P700 chlorophyll a apoprotein A2
			TRINITY_DN11423_c0_g1	3.40963	1.05e-06	1.55e-05	TraesCS7B01G170700.1	18	525	525	0	TraesCS7B01G170700	chr7B	242910585	242911109	Photosystem II reaction center PsbP family protein
			TRINITY_DN30380_c0_g2	3.36822	0.000325564	0.00163034	TraesCS4D01G135000.1	448	315	1209	2.78e-58	TraesCS4D01G135000	chr4D	121816441	121818474	Ribulose bisphosphate carboxylase/oxygenase activase
			TRINITY_DN18013_c0_g1	3.32174	1.24e-08	2.91e-07	TraesCS4A01G177500.1	939	997	1395	2.32e-23	TraesCS4A01G177500	chr4A	449266176	449268195	Ribulose bisphosphate carboxylase/oxygenase activase
			TRINITY_DN916_c0_g2	3.18769	1.69e-08	2.31e-07	TraesCS4B01G250100.1	1	1381	1830	0	TraesCS4B01G250100	chr4B	516503337	516507514	Photosystem I reaction center subunit III
			TRINITY_DN82168_c0_g1	3.16125	1.71e-05	0.000109009	TraesCS1D01G181100.1	1742	1602	2202	7.11e-48	TraesCS1D01G181100	chr1D	254463783	254465986	Photosystem I P700 chlorophyll a apoprotein A2
			TRINITY_DN15554_c0_g1	3.12335	1.49e-08	2.08e-07	TraesCS4B01G250100.1	1378	1830	1830	0	TraesCS4B01G250100	chr4B	516503337	516507514	Photosystem I reaction center subunit III
			TRINITY_DN27901_c0_g2	3.05037	5.23e-09	8.08e-08	TraesCS2B01G078900.1	138	316	549	2.11e-88	TraesCS2B01G078900	chr2B	44190898	44191961	Ribulose bisphosphate carboxylase small chain
			TRINITY_DN43336_c0_g1	3.03502	0.000165535	0.000884911	TraesCS5D01G010000.1	1	558	558	0	TraesCS5D01G010000	chr5D	6212311	6216651	Photosystem I assembly protein Ycf4
			TRINITY_DN115071_c0_g1	3.03429	0.000204154	0.00169081	TraesCS1A01G383200.1	454	508	543	4.01e-21	TraesCS1A01G383200	chr1A	553983341	553984443	Photosynthetic NDH subcomplex B 3
			TRINITY_DN148831_c0_g1	2.94001	6.39e-06	4.53e-05	TraesCS6A01G358100.1	234	290	384	3.44e-22	TraesCS6A01G358100	chr6A	588230429	588232406	Photosystem II 10 kDa polypeptide
			TRINITY_DN40865_c0_g1	2.913	0.000171512	0.00145236	TraesCS7B01G063400.1	1673	1731	2481	1.43e-21	TraesCS7B01G063400	chr7B	68344330	68348404	Sucrose synthase
			TRINITY_DN11423_c0_g2	2.85228	2.56e-05	0.000263374	TraesCS7B01G170700.1	525	239	525	8.86e-145	TraesCS7B01G170700	chr7B	242910585	242911109	Photosystem II reaction center PsbP family protein
			TRINITY_DN52424_c0_g1	2.84351	2.84e-05	0.000289561	TraesCS6B01G412100.1	160	220	423	7.33e-24	TraesCS6B01G412100	chr6B	685636044	685636931	Photosystem II 10 kDa polypeptide family protein
			TRINITY_DN92104_c0_g1	2.84147	0.000137419	0.00119451	TraesCS7A01G158900.1	2321	2380	2427	7e-24	TraesCS7A01G158900	chr7A	115204109	115208145	Sucrose synthase
			TRINITY_DN2404_c1_g1	2.81355	1.45e-06	2.06e-05	TraesCS3D01G053400.1	66	1158	1158	0	TraesCS3D01G053400	chr3D	21903938	21905358	Photosystem II CP47 reaction center protein
			TRINITY_DN61185_c0_g1	2.69945	0.00612434	0.0212644	TraesCS3D01G274200.1	906	966	966	5.08e-21	TraesCS3D01G274200	chr3D	380123760	380131949	L-ribulose-5-phosphate 3-epimerase UlaE
			TRINITY_DN30380_c0_g1	2.53953	1.59e-07	2.92e-06	TraesCS4B01G140300.1	437	524	1395	3.49e-39	TraesCS4B01G140300	chr4B	184607712	184609757	Ribulose bisphosphate carboxylase/oxygenase activase
			TRINITY_DN2463_c0_g1	2.50157	1.98e-05	0.000125018	TraesCS2B01G372700.1	1	819	819	0	TraesCS2B01G372700	chr2B	531135183	531136396	Photosystem II reaction center PsbP family protein
			TRINITY_DN2929_c0_g1	2.48101	2.25e-05	0.000140802	TraesCS4A01G177500.1	333	1281	1395	0	TraesCS4A01G177500	chr4A	449266176	449268195	Ribulose bisphosphate carboxylase/oxygenase activase
			TRINITY_DN36344_c0_g1	2.47519	6.32e-09	9.58e-08	TraesCS7A01G291000.1	1	684	789	0	TraesCS7A01G291000	chr7A	353200980	353244515	acclimation of photosynthesis to environment
			TRINITY_DN107835_c0_g2	2.47169	2.55e-05	0.000261826	TraesCS2B01G487500.1	125	510	510	0	TraesCS2B01G487500	chr2B	683737949	683739942	Photosystem I assembly protein Ycf3
			TRINITY_DN180930_c0_g1	2.36267	0.000875412	0.00395814	TraesCS2D01G352700.1	622	755	819	5.46e-37	TraesCS2D01G352700	chr2D	450998029	450999250	Photosystem II reaction center PsbP family protein
			TRINITY_DN30040_c0_g1	2.34866	6.07e-07	5.52e-06	TraesCS5B01G513800.2	1	1518	1518	0	TraesCS5B01G513800	chr5B	678915972	678918877	Ribulose bisphosphate carboxylase large chain
			TRINITY_DN13173_c2_g1	2.32375	1.67e-06	1.36e-05	TraesCS4A01G031700.1	1052	1080	1080	1.44e-06	TraesCS4A01G031700	chr4A	24762735	24763906	Photosynthetic NDH subcomplex B 2
			TRINITY_DN5802_c0_g1	2.31204	1.31e-06	1.09e-05	TraesCS7A01G504900.2	1	756	903	0	TraesCS7A01G504900	chr7A	692905529	692907941	Photosystem II reaction center PsbP family protein
			TRINITY_DN58380_c0_g1	2.07142	0.00108169	0.00714191	TraesCS7A01G291000.1	631	682	789	1.07e-18	TraesCS7A01G291000	chr7A	353200980	353244515	acclimation of photosynthesis to environment
			TRINITY_DN80711_c0_g1	2.06762	0.00203564	0.012189	TraesCS1B01G404500.1	1	213	213	4.33e-106	TraesCS1B01G404500	chr1B	633708708	633708920	Photosystem II reaction center protein Z
