# Supplementary material for: Insight into the mechanisms of terminal HS-tolerance in wheat mutant with improved nutritional quality through de novo transcriptome sequencing
Source: Research Square preprint supplement (doi:10.21203/rs.3.rs-241832/v1), 2021-02-26
Supplement: Supplementary file 6 [file 43f0bedcacc443a948fb85a5.xlsx]

## Sheet: Sheet1
	Insight into the mechanisms of terminal HS-tolerance in wheat mutant with improved nutritional quality through de novo transcriptome sequencing Ranjeet R. Kumar, Suman Bakshi, Kavita Dubey, Sumedha Hasija, Gyanendra K. Rai, Neelu Jain, Sanjay Jambhulkar, Bhupinder Singh, Gyanendra P. Singh, & Shelly Praveen
	Table S9 Biological pathway annotations and functional analysis of proteins of identified differentially expressed transcripts using KEGG, InterPro, RefSeq, eggnog, OrthoDB, Pfam, PROSITE, PANTHER, and TIGRFAMs databases.
	qseqid	sseqid	organism	gene_name	gene_description	name	id	protein_name	description	KEGG	InterPro	RefSeq	eggNOG	OrthoDB	Pfam	PROSITE	PANTHER	TIGRFAMs
	TRINITY_DN28000_c0_g1_i1	sp|Q67TP9|HSFB1_ORYSJ	Oryza sativa subsp. japonica (Rice)	HSFB1 HSF23 Os09g0456800, LOC_Os09g28354, LOC_Os09g28360 B1342C04.35	Name=HSFB1; Synonyms=HSF23; OrderedLocusNames=Os09g0456800, LOC_Os09g28354, LOC_Os09g28360; ORFNames=B1342C04.35;	HSFB1_ORYSJ	Q67TP9	Heat stress transcription factor B-1; Heat stress transcription factor 23; OsHsf-23	RecName: Full=Heat stress transcription factor B-1; AltName: Full=Heat stress transcription factor 23; Short=OsHsf-23;	osa:4347259	IPR000232;IPR027725;IPR036388;IPR036390	XP_015611859.1	KOG0627;COG5169	EOG09360JWU	PF00447	PS00434	PTHR10015
	TRINITY_DN28082_c0_g3_i1	sp|O22854|ETFQO_ARATH	Arabidopsis thaliana (Mouse-ear cress)	ETFQO At2g43400 T1O24	Name=ETFQO; OrderedLocusNames=At2g43400; ORFNames=T1O24;	ETFQO_ARATH	O22854	Electron transfer flavoprotein-ubiquinone oxidoreductase, mitochondrial; ETF-QO; ETF-ubiquinone oxidoreductase	RecName: Full=Electron transfer flavoprotein-ubiquinone oxidoreductase, mitochondrial; Short=ETF-QO; Short=ETF-ubiquinone oxidoreductase; EC=1.5.5.1; Flags: Precursor;	ath:AT2G43400	IPR036188	NP_181868.1	KOG2415;COG0644	EOG0936060Z
	TRINITY_DN28020_c0_g2_i1	tr|I1GQL2|I1GQL2_BRADI	Brachypodium distachyon (Purple false brome) (Trachynia distachya)	LOC100826597 BRADI_1g15547	Name=LOC100826597 {ECO:0000313|EnsemblPlants:BRADI1G15547.1}; ORFNames=BRADI_1g15547 {ECO:0000313|EMBL:KQK14340.1};	I1GQL2_BRADI	I1GQL2	Uncharacterized protein	SubName: Full=Uncharacterized protein {ECO:0000313|EMBL:KQK14340.1, ECO:0000313|EnsemblPlants:BRADI1G15547.1};	bdi:100826597	IPR001087;IPR036514;IPR035669	XP_003559714.1	ENOG410IVKR;COG3240	EOG09360HCX	PF00657
	TRINITY_DN28070_c0_g1_i11	tr|I1HVT0|I1HVT0_BRADI	Brachypodium distachyon (Purple false brome) (Trachynia distachya)	LOC100842635 BRADI_2g62470	Name=LOC100842635 {ECO:0000313|EnsemblPlants:BRADI2G62470.2}; ORFNames=BRADI_2g62470 {ECO:0000313|EMBL:KQK11795.1};	I1HVT0_BRADI	I1HVT0	Uncharacterized protein	SubName: Full=Uncharacterized protein {ECO:0000313|EMBL:KQK11795.1, ECO:0000313|EnsemblPlants:BRADI2G62470.2};	bdi:100842635	IPR008162;IPR036649	XP_003565184.1	KOG1626;COG0221	EOG09360MB0	PF00719	PS00387	PTHR10286
	TRINITY_DN28084_c0_g1_i3	tr|I1J2X9|I1J2X9_BRADI	Brachypodium distachyon (Purple false brome) (Trachynia distachya)	LOC100822289 BRADI_5g24917	Name=LOC100822289 {ECO:0000313|EnsemblPlants:BRADI5G24917.1}; ORFNames=BRADI_5g24917 {ECO:0000313|EMBL:KQJ85112.1};	I1J2X9_BRADI	I1J2X9	Uncharacterized protein	SubName: Full=Uncharacterized protein {ECO:0000313|EMBL:KQJ85112.1, ECO:0000313|EnsemblPlants:BRADI5G24917.1};	bdi:100822289	IPR011010;IPR013034;IPR013030;IPR001631;IPR018521;IPR025834;IPR014711;IPR014727;IPR013500;IPR008336;IPR036202;IPR013499	XP_003579431.2	KOG0981;COG3569	EOG093603SY	PF14370;PF01028;PF02919	PS00176	PTHR10290
	TRINITY_DN91588_c0_g1_i1	tr|A0A0S2K153|A0A0S2K153_9GAMM	Pseudoalteromonas phenolica	PP2015_1732	ORFNames=PP2015_1732 {ECO:0000313|EMBL:ALO42234.1};	A0A0S2K153_9GAMM	A0A0S2K153	2-oxoisovalerate dehydrogenase subunit beta	SubName: Full=2-oxoisovalerate dehydrogenase subunit beta {ECO:0000313|EMBL:ALO42234.1};	pphe:PP2015_1732	IPR029061;IPR009014;IPR005475;IPR033248	WP_058029906.1			PF02779;PF02780
	TRINITY_DN91587_c0_g1_i1	tr|C3ZHN5|C3ZHN5_BRAFL	Branchiostoma floridae (Florida lancelet) (Amphioxus)	BRAFLDRAFT_280654	ORFNames=BRAFLDRAFT_280654 {ECO:0000313|EMBL:EEN48030.1};	C3ZHN5_BRAFL	C3ZHN5	Uncharacterized protein	SubName: Full=Uncharacterized protein {ECO:0000313|EMBL:EEN48030.1}; Flags: Fragment;	bfo:BRAFLDRAFT_280654	IPR009057;IPR001356;IPR016439;IPR006634	XP_002592019.1	KOG1607;COG5058		PF00046;PF03798	PS50071;PS50922	PTHR12560
	TRINITY_DN91564_c0_g1_i1	tr|L8GX53|L8GX53_ACACA	Acanthamoeba castellanii str. Neff	ACA1_063390	ORFNames=ACA1_063390 {ECO:0000313|EMBL:ELR17575.1};	L8GX53_ACACA	L8GX53	60S ribosomal protein, putative	SubName: Full=60S ribosomal protein, putative {ECO:0000313|EMBL:ELR17575.1};	acan:ACA1_063390	IPR029064;IPR000231;IPR022991;IPR004038	XP_004339588.1			PF01248	PS00709;PS00993	PTHR11449:SF8
	TRINITY_DN91596_c0_g1_i1	tr|D0LXB5|D0LXB5_HALO1	Haliangium ochraceum (strain DSM 14365 / JCM 11303 / SMP-2)	Hoch_3655	OrderedLocusNames=Hoch_3655 {ECO:0000313|EMBL:ACY16157.1};	D0LXB5_HALO1	D0LXB5	Uncharacterized protein	SubName: Full=Uncharacterized protein {ECO:0000313|EMBL:ACY16157.1};	hoh:Hoch_3655	IPR025351	WP_012828756.1		POG091H0F5O	PF14065
	TRINITY_DN91595_c0_g1_i1	tr|A7SHY5|A7SHY5_NEMVE	Nematostella vectensis (Starlet sea anemone)	v1g245394	ORFNames=v1g245394 {ECO:0000313|EMBL:EDO36655.1};	A7SHY5_NEMVE	A7SHY5	Predicted protein	SubName: Full=Predicted protein {ECO:0000313|EMBL:EDO36655.1};	nve:NEMVE_v1g245394	IPR036919;IPR018038;IPR016082;IPR012988;IPR005998;IPR035808	XP_001628718.1	KOG3184;COG1841	EOG091G0IHS	PF00327;PF08079	PS00634		TIGR01310
	TRINITY_DN91505_c0_g1_i1	tr|M2T558|M2T558_COCSN	Cochliobolus sativus (strain ND90Pr / ATCC 201652) (Common root rot and spot blotch fungus) (Bipolaris sorokiniana)	COCSADRAFT_160353	ORFNames=COCSADRAFT_160353 {ECO:0000313|EMBL:EMD64107.1};	M2T558_COCSN	M2T558	Uncharacterized protein	SubName: Full=Uncharacterized protein {ECO:0000313|EMBL:EMD64107.1};	bsc:COCSADRAFT_160353	IPR000218;IPR019972;IPR036853	XP_007699992.1		EOG092C5AG7	PF00238	PS00049	PTHR11761
	TRINITY_DN30122_c0_g2_i1	tr|I1J2G2|I1J2G2_BRADI	Brachypodium distachyon (Purple false brome) (Trachynia distachya)	LOC100827120 BRADI_5g23600	Name=LOC100827120 {ECO:0000313|EnsemblPlants:BRADI5G23600.1}; ORFNames=BRADI_5g23600 {ECO:0000313|EMBL:KQJ84902.1};	I1J2G2_BRADI	I1J2G2	Uncharacterized protein	SubName: Full=Uncharacterized protein {ECO:0000313|EMBL:KQJ84902.1, ECO:0000313|EnsemblPlants:BRADI5G23600.1};	bdi:100827120	IPR003593;IPR011527;IPR036640;IPR003439;IPR017871;IPR027417	XP_003579371.1	KOG0055;COG1132	EOG093600JM	PF00664;PF00005	PS50929;PS00211;PS50893
	TRINITY_DN30170_c0_g1_i4	tr|D7MHY1|D7MHY1_ARALL	Arabidopsis lyrata subsp. lyrata (Lyre-leaved rock-cress)	ARALYDRAFT_915730	ORFNames=ARALYDRAFT_915730 {ECO:0000313|EMBL:EFH46718.1};	D7MHY1_ARALL	D7MHY1	Polyubiquitin	SubName: Full=Polyubiquitin {ECO:0000313|EMBL:EFH46718.1};	aly:ARALYDRAFT_915730	IPR019956;IPR029071;IPR019954;IPR000626	XP_002870459.1		EOG093608U5	PF00240	PS00299;PS50053
	TRINITY_DN30170_c0_g1_i3	tr|D7MHY1|D7MHY1_ARALL	Arabidopsis lyrata subsp. lyrata (Lyre-leaved rock-cress)	ARALYDRAFT_915730	ORFNames=ARALYDRAFT_915730 {ECO:0000313|EMBL:EFH46718.1};	D7MHY1_ARALL	D7MHY1	Polyubiquitin	SubName: Full=Polyubiquitin {ECO:0000313|EMBL:EFH46718.1};	aly:ARALYDRAFT_915730	IPR019956;IPR029071;IPR019954;IPR000626	XP_002870459.1		EOG093608U5	PF00240	PS00299;PS50053
	TRINITY_DN30170_c2_g1_i1	tr|A0A1U8NGX1|A0A1U8NGX1_GOSHI	Gossypium hirsutum (Upland cotton) (Gossypium mexicanum)	LOC107948317 LOC107899654, LOC107933786	Name=LOC107948317 {ECO:0000313|RefSeq:XP_016738302.1}; Synonyms=LOC107899654 {ECO:0000313|RefSeq:XP_016680914.1}, LOC107933786 {ECO:0000313|RefSeq:XP_016721559.1};	A0A1U8NGX1_GOSHI	A0A1U8NGX1	polyubiquitin-like	SubName: Full=polyubiquitin-like {ECO:0000313|RefSeq:XP_016680914.1, ECO:0000313|RefSeq:XP_016721559.1, ECO:0000313|RefSeq:XP_016738302.1};	ghi:107899654;ghi:107933786;ghi:107948317	IPR019956;IPR029071;IPR019954;IPR000626	XP_016680914.1;XP_016721559.1;XP_016738302.1			PF00240	PS00299;PS50053
	TRINITY_DN125_c0_g1_i5	tr|Q8HCR2|Q8HCR2_ORYSJ	Oryza sativa subsp. japonica (Rice)	rps7	Name=rps7 {ECO:0000313|EMBL:BAC19857.2};	Q8HCR2_ORYSJ	Q8HCR2	Ribosomal protein S7	SubName: Full=Ribosomal protein S7 {ECO:0000313|EMBL:BAC19857.2};	osa:6450151	IPR000235;IPR005717;IPR023798;IPR036823;IPR034643	YP_002000553.1	KOG3291;COG0049	EOG09360QHQ	PF00177		PTHR11205	TIGR01029
	TRINITY_DN192_c0_g1_i6	tr|I1HGC1|I1HGC1_BRADI	Brachypodium distachyon (Purple false brome) (Trachynia distachya)	LOC100841831 BRADI_2g16290	Name=LOC100841831 {ECO:0000313|EnsemblPlants:BRADI2G16290.1}; ORFNames=BRADI_2g16290 {ECO:0000313|EMBL:KQK04838.1};	I1HGC1_BRADI	I1HGC1	Chlorophyll a-b binding protein, chloroplastic	RecName: Full=Chlorophyll a-b binding protein, chloroplastic {ECO:0000256|RuleBase:RU363080};	bdi:100841831	IPR001344;IPR022796;IPR023329	XP_010231015.1	ENOG410IU0X;ENOG410ZHBU	EOG09360I0J	PF00504		PTHR21649
	TRINITY_DN192_c5_g1_i1	sp|P0CJ48|CB1A_ARATH	Arabidopsis thaliana (Mouse-ear cress)	LHCB1.1 AB165, CAB2, LHCP-B At1g29920 F1N18.4	Name=LHCB1.1; Synonyms=AB165, CAB2, LHCP-B; OrderedLocusNames=At1g29920; ORFNames=F1N18.4;	CB1A_ARATH	P0CJ48	Chlorophyll a-b binding protein 2, chloroplastic; Chlorophyll a-b protein 165; CAB-165; LHCII type I CAB-2	RecName: Full=Chlorophyll a-b binding protein 2, chloroplastic; AltName: Full=Chlorophyll a-b protein 165; Short=CAB-165; AltName: Full=LHCII type I CAB-2; Flags: Precursor;	ath:AT1G29910;ath:AT1G29920	IPR001344;IPR022796;IPR023329	NP_564339.1;NP_564340.1	ENOG410IU0X;ENOG410ZHBU	EOG09360I0J	PF00504		PTHR21649
	TRINITY_DN192_c5_g2_i1	sp|P0CJ48|CB1A_ARATH	Arabidopsis thaliana (Mouse-ear cress)	LHCB1.1 AB165, CAB2, LHCP-B At1g29920 F1N18.4	Name=LHCB1.1; Synonyms=AB165, CAB2, LHCP-B; OrderedLocusNames=At1g29920; ORFNames=F1N18.4;	CB1A_ARATH	P0CJ48	Chlorophyll a-b binding protein 2, chloroplastic; Chlorophyll a-b protein 165; CAB-165; LHCII type I CAB-2	RecName: Full=Chlorophyll a-b binding protein 2, chloroplastic; AltName: Full=Chlorophyll a-b protein 165; Short=CAB-165; AltName: Full=LHCII type I CAB-2; Flags: Precursor;	ath:AT1G29910;ath:AT1G29920	IPR001344;IPR022796;IPR023329	NP_564339.1;NP_564340.1	ENOG410IU0X;ENOG410ZHBU	EOG09360I0J	PF00504		PTHR21649
	TRINITY_DN192_c5_g2_i2	sp|P0CJ48|CB1A_ARATH	Arabidopsis thaliana (Mouse-ear cress)	LHCB1.1 AB165, CAB2, LHCP-B At1g29920 F1N18.4	Name=LHCB1.1; Synonyms=AB165, CAB2, LHCP-B; OrderedLocusNames=At1g29920; ORFNames=F1N18.4;	CB1A_ARATH	P0CJ48	Chlorophyll a-b binding protein 2, chloroplastic; Chlorophyll a-b protein 165; CAB-165; LHCII type I CAB-2	RecName: Full=Chlorophyll a-b binding protein 2, chloroplastic; AltName: Full=Chlorophyll a-b protein 165; Short=CAB-165; AltName: Full=LHCII type I CAB-2; Flags: Precursor;	ath:AT1G29910;ath:AT1G29920	IPR001344;IPR022796;IPR023329	NP_564339.1;NP_564340.1	ENOG410IU0X;ENOG410ZHBU	EOG09360I0J	PF00504		PTHR21649
	TRINITY_DN117_c1_g1_i1	tr|I1GVF7|I1GVF7_BRADI	Brachypodium distachyon (Purple false brome) (Trachynia distachya)	LOC100831622 BRADI_1g30520	Name=LOC100831622 {ECO:0000313|EnsemblPlants:BRADI1G30520.1}; ORFNames=BRADI_1g30520 {ECO:0000313|EMBL:KQK16777.1};	I1GVF7_BRADI	I1GVF7	Uncharacterized protein	SubName: Full=Uncharacterized protein {ECO:0000313|EMBL:KQK16777.1, ECO:0000313|EnsemblPlants:BRADI1G30520.1};	bdi:100831622	IPR001296;IPR006380;IPR035659;IPR000368;IPR012819	XP_003563303.1	KOG0853;COG0438	EOG093600RM	PF00534;PF05116;PF00862			TIGR02468
	TRINITY_DN111_c0_g2_i1	tr|I1IT57|I1IT57_BRADI	Brachypodium distachyon (Purple false brome) (Trachynia distachya)	LOC100834056 BRADI_4g38860	Name=LOC100834056 {ECO:0000313|EnsemblPlants:BRADI4G38860.1}; ORFNames=BRADI_4g38860 {ECO:0000313|EMBL:KQJ91640.1};	I1IT57_BRADI	I1IT57	Uncharacterized protein	SubName: Full=Uncharacterized protein {ECO:0000313|EMBL:KQJ91640.1, ECO:0000313|EnsemblPlants:BRADI4G38860.1};	bdi:100834056	IPR000008;IPR035892	XP_003578699.1	ENOG410IWFK;ENOG410YIGG	EOG09360S3M	PF00168	PS50004
	TRINITY_DN88639_c0_g1_i1	tr|A0A1S2YNG1|A0A1S2YNG1_CICAR	Cicer arietinum (Chickpea) (Garbanzo)	LOC101488671	Name=LOC101488671 {ECO:0000313|RefSeq:XP_004507479.1};	A0A1S2YNG1_CICAR	A0A1S2YNG1	Nascent polypeptide-associated complex subunit beta	RecName: Full=Nascent polypeptide-associated complex subunit beta {ECO:0000256|RuleBase:RU361272};	cam:101488671	IPR002715	XP_004507479.1			PF01849	PS51151
	TRINITY_DN88663_c0_g1_i8	sp|Q8H0W3|RVE6_ARATH	Arabidopsis thaliana (Mouse-ear cress)	RVE6 At5g52660 F6N7.15	Name=RVE6; OrderedLocusNames=At5g52660; ORFNames=F6N7.15;	RVE6_ARATH	Q8H0W3	Protein REVEILLE 6	RecName: Full=Protein REVEILLE 6;	ath:AT5G52660	IPR009057;IPR017930;IPR006447;IPR001005	NP_568776.2;NP_851177.1	KOG0724;COG5269	EOG09360I2V	PF00249	PS51294		TIGR01557
	TRINITY_DN88663_c0_g1_i5	sp|Q8H0W3|RVE6_ARATH	Arabidopsis thaliana (Mouse-ear cress)	RVE6 At5g52660 F6N7.15	Name=RVE6; OrderedLocusNames=At5g52660; ORFNames=F6N7.15;	RVE6_ARATH	Q8H0W3	Protein REVEILLE 6	RecName: Full=Protein REVEILLE 6;	ath:AT5G52660	IPR009057;IPR017930;IPR006447;IPR001005	NP_568776.2;NP_851177.1	KOG0724;COG5269	EOG09360I2V	PF00249	PS51294		TIGR01557
	TRINITY_DN88663_c0_g1_i6	sp|Q8H0W3|RVE6_ARATH	Arabidopsis thaliana (Mouse-ear cress)	RVE6 At5g52660 F6N7.15	Name=RVE6; OrderedLocusNames=At5g52660; ORFNames=F6N7.15;	RVE6_ARATH	Q8H0W3	Protein REVEILLE 6	RecName: Full=Protein REVEILLE 6;	ath:AT5G52660	IPR009057;IPR017930;IPR006447;IPR001005	NP_568776.2;NP_851177.1	KOG0724;COG5269	EOG09360I2V	PF00249	PS51294		TIGR01557
	TRINITY_DN88663_c0_g1_i3	sp|Q8H0W3|RVE6_ARATH	Arabidopsis thaliana (Mouse-ear cress)	RVE6 At5g52660 F6N7.15	Name=RVE6; OrderedLocusNames=At5g52660; ORFNames=F6N7.15;	RVE6_ARATH	Q8H0W3	Protein REVEILLE 6	RecName: Full=Protein REVEILLE 6;	ath:AT5G52660	IPR009057;IPR017930;IPR006447;IPR001005	NP_568776.2;NP_851177.1	KOG0724;COG5269	EOG09360I2V	PF00249	PS51294		TIGR01557
	TRINITY_DN88664_c0_g2_i1	tr|A0A1X9YH52|A0A1X9YH52_9SPHN	Sphingomonas sp. KC8	KC8_12845	ORFNames=KC8_12845 {ECO:0000313|EMBL:ARS28162.1};	A0A1X9YH52_9SPHN	A0A1X9YH52	Acyl-CoA dehydrogenase	SubName: Full=Acyl-CoA dehydrogenase {ECO:0000313|EMBL:ARS28162.1};	spkc:KC8_12845	IPR006091;IPR036250;IPR009075;IPR013786;IPR037069;IPR009100	WP_010123064.1			PF00441;PF02770;PF02771
	TRINITY_DN57063_c0_g1_i7	tr|I1IVZ1|I1IVZ1_BRADI	Brachypodium distachyon (Purple false brome) (Trachynia distachya)	LOC100846882 BRADI_5g02380	Name=LOC100846882 {ECO:0000313|EnsemblPlants:BRADI5G02380.1}; ORFNames=BRADI_5g02380 {ECO:0000313|EMBL:KQJ81700.1};	I1IVZ1_BRADI	I1IVZ1	Uncharacterized protein	SubName: Full=Uncharacterized protein {ECO:0000313|EMBL:KQJ81700.1, ECO:0000313|EnsemblPlants:BRADI5G02380.1};	bdi:100846882	IPR000120;IPR020556;IPR023631;IPR036928	XP_003580899.2	KOG1211;COG0154	EOG093603Z7	PF01425	PS00571	PTHR11895
	TRINITY_DN59554_c1_g1_i2	tr|Q6ASX7|Q6ASX7_ORYSJ	Oryza sativa subsp. japonica (Rice)	Os03g0670700 LOC_Os03g46770 B1130H05.5, OSNPB_030670700	Name=Os03g0670700 {ECO:0000313|EMBL:BAS85686.1}; OrderedLocusNames=LOC_Os03g46770 {ECO:0000313|EMBL:ABF98115.1}; ORFNames=B1130H05.5 {ECO:0000313|EMBL:AAT85299.1}, OSNPB_030670700 {ECO:0000313|EMBL:BAS85686.1};	Q6ASX7_ORYSJ	Q6ASX7	Glycine-rich RNA binding protein; Glycine-rich RNA-binding protein, putative; Os03g0670700 protein; Receptor-like serine threonine kinase; Retrotransposon protein, putative, Ty1-copia subclass, expressed; cDNA clone:J023037K17, full insert sequence	SubName: Full=Glycine-rich RNA binding protein {ECO:0000313|EMBL:ACA50485.1}; SubName: Full=Glycine-rich RNA-binding protein, putative {ECO:0000313|EMBL:AAT85299.1}; SubName: Full=Os03g0670700 protein {ECO:0000313|EMBL:BAS85686.1}; SubName: Full=Receptor-like serine threonine kinase {ECO:0000313|EMBL:ABS83497.1}; SubName: Full=Retrotransposon protein, putative, Ty1-copia subclass, expressed {ECO:…	osa:4333690	IPR035979;IPR000504	XP_015630902.1	KOG0118;COG0724		PF00076	PS50102
	TRINITY_DN59549_c1_g1_i25	tr|A0A067KY23|A0A067KY23_JATCU	Jatropha curcas (Barbados nut)	JCGZ_08000	ORFNames=JCGZ_08000 {ECO:0000313|EMBL:KDP36709.1};	A0A067KY23_JATCU	A0A067KY23	Cellulose synthase	RecName: Full=Cellulose synthase {ECO:0000256|RuleBase:RU361116}; EC=2.4.1.12 {ECO:0000256|RuleBase:RU361116};	jcu:105635136	IPR005150;IPR027934;IPR029044;IPR013083	XP_012073521.1			PF03552;PF14569
	TRINITY_DN59582_c0_g1_i2	tr|G4YYI5|G4YYI5_PHYSP	Phytophthora sojae (strain P6497) (Soybean stem and root rot agent) (Phytophthora megasperma f. sp. glycines)	PHYSODRAFT_284940	ORFNames=PHYSODRAFT_284940 {ECO:0000313|EMBL:EGZ24572.1};	G4YYI5_PHYSP	G4YYI5	COPII GTPase subunit SAR1	SubName: Full=COPII GTPase subunit SAR1 {ECO:0000313|EMBL:EGZ24572.1};	psoj:PHYSODRAFT_284940	IPR027417;IPR005225;IPR006689;IPR006687	XP_009519860.1			PF00025	PS51422		TIGR00231
	TRINITY_DN59582_c0_g1_i1	tr|G4YYI5|G4YYI5_PHYSP	Phytophthora sojae (strain P6497) (Soybean stem and root rot agent) (Phytophthora megasperma f. sp. glycines)	PHYSODRAFT_284940	ORFNames=PHYSODRAFT_284940 {ECO:0000313|EMBL:EGZ24572.1};	G4YYI5_PHYSP	G4YYI5	COPII GTPase subunit SAR1	SubName: Full=COPII GTPase subunit SAR1 {ECO:0000313|EMBL:EGZ24572.1};	psoj:PHYSODRAFT_284940	IPR027417;IPR005225;IPR006689;IPR006687	XP_009519860.1			PF00025	PS51422		TIGR00231
	TRINITY_DN18701_c0_g2_i1	sp|Q0IZS0|NADC_ORYSJ	Oryza sativa subsp. japonica (Rice)	Os09g0553600, LOC_Os09g38060 OsJ_30273	OrderedLocusNames=Os09g0553600, LOC_Os09g38060; ORFNames=OsJ_30273;	NADC_ORYSJ	Q0IZS0	Nicotinate-nucleotide pyrophosphorylase [carboxylating], chloroplastic; Quinolinate phosphoribosyltransferase [decarboxylating]	RecName: Full=Nicotinate-nucleotide pyrophosphorylase [carboxylating], chloroplastic; EC=2.4.2.19; AltName: Full=Quinolinate phosphoribosyltransferase [decarboxylating]; Flags: Precursor;	osa:4347802	IPR013785;IPR004393;IPR027277;IPR036068;IPR037128;IPR002638;IPR022412	XP_015612687.1	KOG3008;COG0157	EOG09360EEQ	PF01729;PF02749		PTHR32179	TIGR00078
	TRINITY_DN18715_c0_g1_i10	tr|I1ID46|I1ID46_BRADI	Brachypodium distachyon (Purple false brome) (Trachynia distachya)	LOC100830517 BRADI_3g53100	Name=LOC100830517 {ECO:0000313|EnsemblPlants:BRADI3G53100.1}; ORFNames=BRADI_3g53100 {ECO:0000313|EMBL:KQK00988.1};	I1ID46_BRADI	I1ID46	Uncharacterized protein	SubName: Full=Uncharacterized protein {ECO:0000313|EMBL:KQK00988.1, ECO:0000313|EnsemblPlants:BRADI3G53100.1};	bdi:100830517	IPR018181;IPR029048;IPR029047;IPR013126	XP_003570218.1	KOG0103;KOG0104;COG0443	EOG093602IF	PF00012	PS01036
	TRINITY_DN18715_c0_g1_i2	tr|I1ID46|I1ID46_BRADI	Brachypodium distachyon (Purple false brome) (Trachynia distachya)	LOC100830517 BRADI_3g53100	Name=LOC100830517 {ECO:0000313|EnsemblPlants:BRADI3G53100.1}; ORFNames=BRADI_3g53100 {ECO:0000313|EMBL:KQK00988.1};	I1ID46_BRADI	I1ID46	Uncharacterized protein	SubName: Full=Uncharacterized protein {ECO:0000313|EMBL:KQK00988.1, ECO:0000313|EnsemblPlants:BRADI3G53100.1};	bdi:100830517	IPR018181;IPR029048;IPR029047;IPR013126	XP_003570218.1	KOG0103;KOG0104;COG0443	EOG093602IF	PF00012	PS01036
	TRINITY_DN22840_c2_g1_i2	tr|C5YB46|C5YB46_SORBI	Sorghum bicolor (Sorghum) (Sorghum vulgare)	SORBI_3006G280000	ORFNames=SORBI_3006G280000 {ECO:0000313|EMBL:EES11709.1};	C5YB46_SORBI	C5YB46	Uncharacterized protein	SubName: Full=Uncharacterized protein {ECO:0000313|EMBL:EES11709.1};	sbi:8076521	IPR011989;IPR016024;IPR000357;IPR001494	XP_002447381.1	KOG2023;ENOG410XPK2	EOG093601RO	PF02985;PF03810	PS50166
	TRINITY_DN22834_c0_g2_i9	tr|V4N5P6|V4N5P6_EUTSA	Eutrema salsugineum (Saltwater cress) (Sisymbrium salsugineum)	EUTSA_v100140651mg	ORFNames=EUTSA_v100140651mg {ECO:0000313|EMBL:ESQ40831.1};	V4N5P6_EUTSA	V4N5P6	Uncharacterized protein	SubName: Full=Uncharacterized protein {ECO:0000313|EMBL:ESQ40831.1}; Flags: Fragment;	eus:EUTSA_v100140651m	IPR020003;IPR000194;IPR024034;IPR027417	XP_006399377.1;XP_006399378.1			PF00006	PS00152
	TRINITY_DN22846_c1_g1_i1	tr|I1IEQ7|I1IEQ7_BRADI	Brachypodium distachyon (Purple false brome) (Trachynia distachya)	LOC100823891 BRADI_3g57610	Name=LOC100823891 {ECO:0000313|EnsemblPlants:BRADI3G57610.1}; ORFNames=BRADI_3g57610 {ECO:0000313|EMBL:KQK01695.1};	I1IEQ7_BRADI	I1IEQ7	Uncharacterized protein	SubName: Full=Uncharacterized protein {ECO:0000313|EMBL:KQK01695.1, ECO:0000313|EnsemblPlants:BRADI3G57610.1};	bdi:100823891	IPR000490;IPR017853;IPR012946	XP_010236896.1	ENOG410IVDS;ENOG410Y94B	EOG093608CE	PF00332;PF07983	PS00587
	TRINITY_DN22806_c1_g1_i1	sp|Q9SSD2|PRP8A_ARATH	Arabidopsis thaliana (Mouse-ear cress)	PRP8A EMB14, EMB177, EMB33, SOF81, SUS2 At1g80070 F18B13.15	Name=PRP8A {ECO:0000303|PubMed:19261069}; Synonyms=EMB14 {ECO:0000303|Ref.3}, EMB177 {ECO:0000303|Ref.3}, EMB33 {ECO:0000303|Ref.3}, SOF81 {ECO:0000303|PubMed:24725596}, SUS2 {ECO:0000303|Ref.3}; OrderedLocusNames=At1g80070 {ECO:0000312|Araport:AT1G80070}; ORFNames=F18B13.15 {ECO:0000312|EMBL:AAD55467.1};	PRP8A_ARATH	Q9SSD2	Pre-mRNA-processing-splicing factor 8A; PRP8 homolog A; AtPRP8A; Protein ABNORMAL SUSPENSOR 2; Protein EMBRYO DEFECTIVE 14; Protein EMBRYO DEFECTIVE 177; Protein EMBRYO DEFECTIVE 33; Protein SUPPRESSOR OF OVEREXPRESSED FCA 81	RecName: Full=Pre-mRNA-processing-splicing factor 8A {ECO:0000305}; AltName: Full=PRP8 homolog A {ECO:0000305}; Short=AtPRP8A {ECO:0000303|PubMed:19261069}; AltName: Full=Protein ABNORMAL SUSPENSOR 2 {ECO:0000303|Ref.3}; AltName: Full=Protein EMBRYO DEFECTIVE 14 {ECO:0000303|Ref.3}; AltName: Full=Protein EMBRYO DEFECTIVE 177 {ECO:0000303|Ref.3}; AltName: Full=Protein EMBRYO DEFECTIVE 33 {ECO:0000…	ath:AT1G80070	IPR000555;IPR037518;IPR012591;IPR012592;IPR012984;IPR027652;IPR021983;IPR019581;IPR019580;IPR012337;IPR019582	NP_178124.2	KOG1795;COG5178	EOG0936000U	PF01398;PF08082;PF08083;PF08084;PF12134;PF10598;PF10597;PF10596	PS50249	PTHR11140
	TRINITY_DN22866_c0_g1_i1	tr|K4A809|K4A809_SETIT	Setaria italica (Foxtail millet) (Panicum italicum)	LOC101762842 SETIT_035015mg	Name=LOC101762842 {ECO:0000313|EnsemblPlants:Si035015m}; ORFNames=SETIT_035015mg {ECO:0000313|EMBL:KQK90890.1};	K4A809_SETIT	K4A809	Uncharacterized protein	SubName: Full=Uncharacterized protein {ECO:0000313|EMBL:KQK90890.1, ECO:0000313|EnsemblPlants:Si035015m};	sita:101762842	IPR011009;IPR000719;IPR017441;IPR008271	XP_004984389.1	KOG0600;ENOG410XPIR	EOG09360937	PF00069	PS00107;PS50011;PS00108
	TRINITY_DN60414_c0_g1_i3	tr|I1GZJ3|I1GZJ3_BRADI	Brachypodium distachyon (Purple false brome) (Trachynia distachya)	LOC100833777 BRADI_1g45150	Name=LOC100833777 {ECO:0000313|EnsemblPlants:BRADI1G45150.1}; ORFNames=BRADI_1g45150 {ECO:0000313|EMBL:KQK18858.1};	I1GZJ3_BRADI	I1GZJ3	Uncharacterized protein	SubName: Full=Uncharacterized protein {ECO:0000313|EMBL:KQK18858.1, ECO:0000313|EnsemblPlants:BRADI1G45150.1};	bdi:100833777	IPR013320;IPR001079;IPR002659	XP_003564048.1;XP_010227827.1	KOG2287;ENOG410ZZ1B	EOG093605Y1	PF00337;PF01762	PS51304	PTHR11214
	TRINITY_DN84398_c0_g1_i3	tr|B2AF56|B2AF56_PODAN	Podospora anserina (strain S / ATCC MYA-4624 / DSM 980 / FGSC 10383) (Pleurage anserina)	PODANS_5_480	ORFNames=PODANS_5_480 {ECO:0000313|EMBL:CAP62073.1};	B2AF56_PODAN	B2AF56	Podospora anserina S mat+ genomic DNA chromosome 5, supercontig 1; Putative glucose transporter	SubName: Full=Podospora anserina S mat+ genomic DNA chromosome 5, supercontig 1 {ECO:0000313|EMBL:CAP62073.1}; SubName: Full=Putative glucose transporter {ECO:0000313|EMBL:CDP29148.1};	pan:PODANSg1313	IPR020846;IPR005828;IPR036259;IPR003663;IPR005829	XP_001904295.1	KOG0254;ENOG410XNQK	EOG092C1Q5W	PF00083	PS50850;PS00216;PS00217		TIGR00879
	TRINITY_DN3047_c0_g1_i1	tr|R0I5H7|R0I5H7_9BRAS	Capsella rubella	CARUB_v10014805mg	ORFNames=CARUB_v10014805mg {ECO:0000313|EMBL:EOA31608.1};	R0I5H7_9BRAS	R0I5H7	Uncharacterized protein	SubName: Full=Uncharacterized protein {ECO:0000313|EMBL:EOA31608.1}; Flags: Fragment;	crb:CARUB_v10014805mg	IPR000218;IPR019972;IPR036853	XP_006298710.1			PF00238	PS00049	PTHR11761
	TRINITY_DN3047_c0_g1_i4	tr|R0I5H7|R0I5H7_9BRAS	Capsella rubella	CARUB_v10014805mg	ORFNames=CARUB_v10014805mg {ECO:0000313|EMBL:EOA31608.1};	R0I5H7_9BRAS	R0I5H7	Uncharacterized protein	SubName: Full=Uncharacterized protein {ECO:0000313|EMBL:EOA31608.1}; Flags: Fragment;	crb:CARUB_v10014805mg	IPR000218;IPR019972;IPR036853	XP_006298710.1			PF00238	PS00049	PTHR11761
	TRINITY_DN3067_c1_g1_i2	tr|K3Z8N3|K3Z8N3_SETIT	Setaria italica (Foxtail millet) (Panicum italicum)	LOC101754291 SETIT_022903mg	Name=LOC101754291 {ECO:0000313|EnsemblPlants:Si022903m}; ORFNames=SETIT_022903mg {ECO:0000313|EMBL:KQL13876.1};	K3Z8N3_SETIT	K3Z8N3	Uncharacterized protein	SubName: Full=Uncharacterized protein {ECO:0000313|EMBL:KQL13876.1, ECO:0000313|EnsemblPlants:Si022903m};	sita:101754291	IPR005519;IPR010028;IPR014403;IPR036412;IPR023214	XP_004960903.1	ENOG410IK9U;ENOG4111X3R	EOG09360K48	PF03767			TIGR01675
	TRINITY_DN58633_c0_g1_i1	tr|L1IQG3|L1IQG3_GUITH	Guillardia theta CCMP2712	GUITHDRAFT_165182	ORFNames=GUITHDRAFT_165182 {ECO:0000313|EMBL:EKX38536.1};	L1IQG3_GUITH	L1IQG3	Uncharacterized protein	SubName: Full=Uncharacterized protein {ECO:0000313|EMBL:EKX38536.1, ECO:0000313|EnsemblProtists:EKX38536};	gtt:GUITHDRAFT_165182	IPR002657;IPR004710	XP_005825516.1			PF01758		PTHR10361
	TRINITY_DN16157_c0_g1_i4	tr|I1HCA3|I1HCA3_BRADI	Brachypodium distachyon (Purple false brome) (Trachynia distachya)	LOC100839511 BRADI_2g03960	Name=LOC100839511 {ECO:0000313|EnsemblPlants:BRADI2G03960.1}; ORFNames=BRADI_2g03960 {ECO:0000313|EMBL:KQK02826.1};	I1HCA3_BRADI	I1HCA3	RNA helicase	RecName: Full=RNA helicase {ECO:0000256|SAAS:SAAS00892872}; EC=3.6.4.13 {ECO:0000256|SAAS:SAAS00892872};	bdi:100839511	IPR011545;IPR025313;IPR014001;IPR001650;IPR027417;IPR000629;IPR014014	XP_003569064.1	KOG0345;ENOG410XNT7	EOG093605FP	PF00270;PF13959;PF00271	PS00039;PS51192;PS51194;PS51195
	TRINITY_DN16157_c0_g1_i5	tr|I1HCA3|I1HCA3_BRADI	Brachypodium distachyon (Purple false brome) (Trachynia distachya)	LOC100839511 BRADI_2g03960	Name=LOC100839511 {ECO:0000313|EnsemblPlants:BRADI2G03960.1}; ORFNames=BRADI_2g03960 {ECO:0000313|EMBL:KQK02826.1};	I1HCA3_BRADI	I1HCA3	RNA helicase	RecName: Full=RNA helicase {ECO:0000256|SAAS:SAAS00892872}; EC=3.6.4.13 {ECO:0000256|SAAS:SAAS00892872};	bdi:100839511	IPR011545;IPR025313;IPR014001;IPR001650;IPR027417;IPR000629;IPR014014	XP_003569064.1	KOG0345;ENOG410XNT7	EOG093605FP	PF00270;PF13959;PF00271	PS00039;PS51192;PS51194;PS51195
	TRINITY_DN16105_c0_g1_i1	tr|A0A1S4D5V1|A0A1S4D5V1_TOBAC	Nicotiana tabacum (Common tobacco)	LOC107826309	Name=LOC107826309 {ECO:0000313|RefSeq:XP_016508756.1};	A0A1S4D5V1_TOBAC	A0A1S4D5V1	60S ribosomal protein L26-1-like	SubName: Full=60S ribosomal protein L26-1-like {ECO:0000313|RefSeq:XP_016508756.1};	nta:107826309	IPR005824;IPR014722;IPR005825;IPR005756;IPR008991	XP_016508756.1			PF00467;PF16906	PS01108	PTHR11143	TIGR01080
	TRINITY_DN16105_c0_g1_i2	tr|A0A1S4D5V1|A0A1S4D5V1_TOBAC	Nicotiana tabacum (Common tobacco)	LOC107826309	Name=LOC107826309 {ECO:0000313|RefSeq:XP_016508756.1};	A0A1S4D5V1_TOBAC	A0A1S4D5V1	60S ribosomal protein L26-1-like	SubName: Full=60S ribosomal protein L26-1-like {ECO:0000313|RefSeq:XP_016508756.1};	nta:107826309	IPR005824;IPR014722;IPR005825;IPR005756;IPR008991	XP_016508756.1			PF00467;PF16906	PS01108	PTHR11143	TIGR01080
	TRINITY_DN16169_c0_g2_i6	tr|Q8HCR7|Q8HCR7_ORYSJ	Oryza sativa subsp. japonica (Rice)	nad1	Name=nad1 {ECO:0000313|EMBL:BAC19852.2};	Q8HCR7_ORYSJ	Q8HCR7	NADH-ubiquinone oxidoreductase chain 1	RecName: Full=NADH-ubiquinone oxidoreductase chain 1 {ECO:0000256|RuleBase:RU000473}; EC=1.6.5.3 {ECO:0000256|RuleBase:RU000473};	osa:6450162	IPR001694;IPR018086	YP_002000548.1			PF00146	PS00667;PS00668	PTHR11432
	TRINITY_DN16190_c0_g1_i1	tr|V4NDD6|V4NDD6_EUTSA	Eutrema salsugineum (Saltwater cress) (Sisymbrium salsugineum)	EUTSA_v10006293mg	ORFNames=EUTSA_v10006293mg {ECO:0000313|EMBL:ESQ43996.1};	V4NDD6_EUTSA	V4NDD6	Uncharacterized protein	SubName: Full=Uncharacterized protein {ECO:0000313|EMBL:ESQ43996.1};	eus:EUTSA_v10006293mg	IPR012606;IPR000589;IPR023029;IPR009068	XP_006402543.1			PF08069;PF00312	PS00362	PTHR11885
	TRINITY_DN94833_c0_g1_i2	tr|C5YW01|C5YW01_SORBI	Sorghum bicolor (Sorghum) (Sorghum vulgare)	SORBI_3009G238500	ORFNames=SORBI_3009G238500 {ECO:0000313|EMBL:EES19973.1};	C5YW01_SORBI	C5YW01	Uncharacterized protein	SubName: Full=Uncharacterized protein {ECO:0000313|EMBL:EES19973.1};	sbi:8074620	IPR001471;IPR036955;IPR016177	XP_002441543.1	ENOG410IW77;ENOG410YMKN	EOG09360MHN	PF00847	PS51032
	TRINITY_DN94833_c0_g1_i1	tr|C5YW01|C5YW01_SORBI	Sorghum bicolor (Sorghum) (Sorghum vulgare)	SORBI_3009G238500	ORFNames=SORBI_3009G238500 {ECO:0000313|EMBL:EES19973.1};	C5YW01_SORBI	C5YW01	Uncharacterized protein	SubName: Full=Uncharacterized protein {ECO:0000313|EMBL:EES19973.1};	sbi:8074620	IPR001471;IPR036955;IPR016177	XP_002441543.1	ENOG410IW77;ENOG410YMKN	EOG09360MHN	PF00847	PS51032
	TRINITY_DN94809_c0_g1_i1	tr|Q201W6|Q201W6_ACYPI	Acyrthosiphon pisum (Pea aphid)	Rpl37a	Name=Rpl37a {ECO:0000313|EnsemblMetazoa:ACYPI000046-PA};	Q201W6_ACYPI	Q201W6	Ribosomal protein L37A-like	SubName: Full=Ribosomal protein L37A-like {ECO:0000313|EMBL:ABD72688.1};	api:100144901	IPR002674;IPR011331;IPR011332	NP_001119668.1	KOG0402;COG1997		PF01780		PTHR43931	TIGR00280
	TRINITY_DN93858_c0_g1_i1	tr|A0A1S2XI19|A0A1S2XI19_CICAR	Cicer arietinum (Chickpea) (Garbanzo)	LOC101494529	Name=LOC101494529 {ECO:0000313|RefSeq:XP_004488812.1};	A0A1S2XI19_CICAR	A0A1S2XI19	elongation factor 2-like	SubName: Full=elongation factor 2-like {ECO:0000313|RefSeq:XP_004488812.1};	cam:101494529	IPR035647;IPR000640;IPR004161;IPR031157;IPR027417;IPR020568;IPR014721;IPR005225;IPR000795;IPR009000;IPR005517	XP_004488812.1			PF00679;PF03764;PF00009;PF03144	PS00301;PS51722		TIGR00231
	TRINITY_DN93890_c0_g2_i1	tr|A7F5J8|A7F5J8_SCLS1	Sclerotinia sclerotiorum (strain ATCC 18683 / 1980 / Ss-1) (White mold) (Whetzelinia sclerotiorum)	SS1G_12876	ORFNames=SS1G_12876 {ECO:0000313|EMBL:EDN98019.1};	A7F5J8_SCLS1	A7F5J8	60S ribosomal protein L11	SubName: Full=60S ribosomal protein L11 {ECO:0000313|EMBL:EDN98019.1};	ssl:SS1G_12876	IPR002132;IPR031309;IPR020929;IPR022803;IPR031310	XP_001586298.1		EOG092C53PI	PF00281;PF00673	PS00358	PTHR11994
	TRINITY_DN93885_c0_g1_i1	tr|A9T7N1|A9T7N1_PHYPA	Physcomitrella patens subsp. patens (Moss)	PHYPADRAFT_219678	ORFNames=PHYPADRAFT_219678 {ECO:0000313|EMBL:EDQ60566.1};	A9T7N1_PHYPA	A9T7N1	40S ribosomal protein S3a	RecName: Full=40S ribosomal protein S3a {ECO:0000256|HAMAP-Rule:MF_03122};	ppp:PHYPADRAFT_219678	IPR027500;IPR001593;IPR018281	XP_001774632.1	KOG1628;COG1890		PF01015	PS01191
	TRINITY_DN93828_c0_g1_i1	tr|C0PDP8|C0PDP8_MAIZE	Zea mays (Maize)	100383159 ZEAMMB73_Zm00001d024047	Name=100383159 {ECO:0000313|EnsemblPlants:Zm00001d024047_P001}; ORFNames=ZEAMMB73_Zm00001d024047 {ECO:0000313|EMBL:AQK40602.1};	C0PDP8_MAIZE	C0PDP8	Leucine-rich repeat protein kinase family protein	SubName: Full=Leucine-rich repeat protein kinase family protein {ECO:0000313|EMBL:AQK40602.1};	zma:100383159	IPR011009;IPR001611;IPR003591;IPR032675;IPR013210;IPR000719	NP_001169295.1	ENOG410IF8T;ENOG410ZGUU	EOG0936080L	PF13855;PF08263;PF00069	PS50011
	TRINITY_DN82916_c0_g1_i1	tr|L8GSV7|L8GSV7_ACACA	Acanthamoeba castellanii str. Neff	ACA1_202670	ORFNames=ACA1_202670 {ECO:0000313|EMBL:ELR16284.1};	L8GSV7_ACACA	L8GSV7	Uncharacterized protein	SubName: Full=Uncharacterized protein {ECO:0000313|EMBL:ELR16284.1};	acan:ACA1_202670	IPR010530	XP_004338297.1			PF06522
	TRINITY_DN82949_c0_g1_i3	tr|A0A1S2YZ15|A0A1S2YZ15_CICAR	Cicer arietinum (Chickpea) (Garbanzo)	LOC101511190	Name=LOC101511190 {ECO:0000313|RefSeq:XP_004512164.1};	A0A1S2YZ15_CICAR	A0A1S2YZ15	SKP1-like protein 1A	SubName: Full=SKP1-like protein 1A {ECO:0000313|RefSeq:XP_004512164.1};	cam:101511190	IPR016897;IPR001232;IPR036296;IPR011333;IPR016072;IPR016073	XP_004512164.1			PF01466;PF03931
	TRINITY_DN82949_c0_g1_i1	tr|A0A1S2YZ15|A0A1S2YZ15_CICAR	Cicer arietinum (Chickpea) (Garbanzo)	LOC101511190	Name=LOC101511190 {ECO:0000313|RefSeq:XP_004512164.1};	A0A1S2YZ15_CICAR	A0A1S2YZ15	SKP1-like protein 1A	SubName: Full=SKP1-like protein 1A {ECO:0000313|RefSeq:XP_004512164.1};	cam:101511190	IPR016897;IPR001232;IPR036296;IPR011333;IPR016072;IPR016073	XP_004512164.1			PF01466;PF03931
	TRINITY_DN82981_c0_g1_i2	tr|I0Z636|I0Z636_COCSC	Coccomyxa subellipsoidea (strain C-169) (Green microalga)	COCSUDRAFT_46495	ORFNames=COCSUDRAFT_46495 {ECO:0000313|EMBL:EIE26105.1};	I0Z636_COCSC	I0Z636	Thioredoxin	RecName: Full=Thioredoxin {ECO:0000256|PIRNR:PIRNR000077};	csl:COCSUDRAFT_46495	IPR005746;IPR036249;IPR017937;IPR013766	XP_005650649.1			PF00085	PS00194;PS51352	PTHR10438	TIGR01068
	TRINITY_DN82981_c0_g1_i1	tr|F2UQE1|F2UQE1_SALR5	Salpingoeca rosetta (strain ATCC 50818 / BSB-021)	PTSG_10131	ORFNames=PTSG_10131 {ECO:0000313|EMBL:EGD79846.1};	F2UQE1_SALR5	F2UQE1	Thioredoxin	RecName: Full=Thioredoxin {ECO:0000256|PIRNR:PIRNR000077};	sre:PTSG_10131	IPR005746;IPR036249;IPR017937;IPR013766	XP_004988467.1			PF00085	PS00194;PS51352	PTHR10438
	TRINITY_DN82981_c0_g1_i3	tr|F2UQE1|F2UQE1_SALR5	Salpingoeca rosetta (strain ATCC 50818 / BSB-021)	PTSG_10131	ORFNames=PTSG_10131 {ECO:0000313|EMBL:EGD79846.1};	F2UQE1_SALR5	F2UQE1	Thioredoxin	RecName: Full=Thioredoxin {ECO:0000256|PIRNR:PIRNR000077};	sre:PTSG_10131	IPR005746;IPR036249;IPR017937;IPR013766	XP_004988467.1			PF00085	PS00194;PS51352	PTHR10438
	TRINITY_DN82954_c0_g1_i6	tr|L1IB26|L1IB26_GUITH	Guillardia theta CCMP2712	GUITHDRAFT_166560	ORFNames=GUITHDRAFT_166560 {ECO:0000313|EMBL:EKX33055.1};	L1IB26_GUITH	L1IB26	Uncharacterized protein	SubName: Full=Uncharacterized protein {ECO:0000313|EMBL:EKX33055.1, ECO:0000313|EnsemblProtists:EKX33055};	gtt:GUITHDRAFT_166560	IPR004000;IPR020902;IPR004001	XP_005820035.1			PF00022	PS00406;PS00432;PS01132	PTHR11937
	TRINITY_DN82954_c0_g1_i5	tr|L1IB26|L1IB26_GUITH	Guillardia theta CCMP2712	GUITHDRAFT_166560	ORFNames=GUITHDRAFT_166560 {ECO:0000313|EMBL:EKX33055.1};	L1IB26_GUITH	L1IB26	Uncharacterized protein	SubName: Full=Uncharacterized protein {ECO:0000313|EMBL:EKX33055.1, ECO:0000313|EnsemblProtists:EKX33055};	gtt:GUITHDRAFT_166560	IPR004000;IPR020902;IPR004001	XP_005820035.1			PF00022	PS00406;PS00432;PS01132	PTHR11937
	TRINITY_DN82984_c0_g1_i1	tr|A4RZJ5|A4RZJ5_OSTLU	Ostreococcus lucimarinus (strain CCE9901)	RPS5 OSTLU_12674	Name=RPS5 {ECO:0000313|EMBL:ABO96875.1}; ORFNames=OSTLU_12674 {ECO:0000313|EMBL:ABO96875.1};	A4RZJ5_OSTLU	A4RZJ5	Ribosomal protein S5, component of cytosolic 80S ribosome and 40S small subunit	SubName: Full=Ribosomal protein S5, component of cytosolic 80S ribosome and 40S small subunit {ECO:0000313|EMBL:ABO96875.1};	olu:OSTLU_12674	IPR000235;IPR005716;IPR020606;IPR023798;IPR036823	XP_001418582.1	KOG3291;COG0049		PF00177	PS00052	PTHR11205	TIGR01028
	TRINITY_DN49621_c0_g2_i1	sp|A8HS48|RS3A_CHLRE	Chlamydomonas reinhardtii (Chlamydomonas smithii)	CHLREDRAFT_168484	ORFNames=CHLREDRAFT_168484;	RS3A_CHLRE	A8HS48	40S ribosomal protein S3a	RecName: Full=40S ribosomal protein S3a {ECO:0000255|HAMAP-Rule:MF_03122};	cre:CHLREDRAFT_168484	IPR027500;IPR001593;IPR018281	XP_001693710.1	KOG1628;COG1890		PF01015	PS01191
	TRINITY_DN49641_c0_g2_i4	tr|I1GPI0|I1GPI0_BRADI	Brachypodium distachyon (Purple false brome) (Trachynia distachya)	LOC100824438	Name=LOC100824438 {ECO:0000313|EnsemblPlants:BRADI1G12267.1};	I1GPI0_BRADI	I1GPI0	Uncharacterized protein	SubName: Full=Uncharacterized protein {ECO:0000313|EnsemblPlants:BRADI1G12267.1};	bdi:100824438	IPR006912	XP_003559567.1	ENOG410IJHN;ENOG410Z1UH	EOG09360IYM	PF04827
	TRINITY_DN49641_c0_g2_i1	tr|I1GPI0|I1GPI0_BRADI	Brachypodium distachyon (Purple false brome) (Trachynia distachya)	LOC100824438	Name=LOC100824438 {ECO:0000313|EnsemblPlants:BRADI1G12267.1};	I1GPI0_BRADI	I1GPI0	Uncharacterized protein	SubName: Full=Uncharacterized protein {ECO:0000313|EnsemblPlants:BRADI1G12267.1};	bdi:100824438	IPR006912	XP_003559567.1	ENOG410IJHN;ENOG410Z1UH	EOG09360IYM	PF04827
	TRINITY_DN49641_c0_g2_i2	tr|I1GPI0|I1GPI0_BRADI	Brachypodium distachyon (Purple false brome) (Trachynia distachya)	LOC100824438	Name=LOC100824438 {ECO:0000313|EnsemblPlants:BRADI1G12267.1};	I1GPI0_BRADI	I1GPI0	Uncharacterized protein	SubName: Full=Uncharacterized protein {ECO:0000313|EnsemblPlants:BRADI1G12267.1};	bdi:100824438	IPR006912	XP_003559567.1	ENOG410IJHN;ENOG410Z1UH	EOG09360IYM	PF04827
	TRINITY_DN49641_c0_g2_i3	tr|I1GPI0|I1GPI0_BRADI	Brachypodium distachyon (Purple false brome) (Trachynia distachya)	LOC100824438	Name=LOC100824438 {ECO:0000313|EnsemblPlants:BRADI1G12267.1};	I1GPI0_BRADI	I1GPI0	Uncharacterized protein	SubName: Full=Uncharacterized protein {ECO:0000313|EnsemblPlants:BRADI1G12267.1};	bdi:100824438	IPR006912	XP_003559567.1	ENOG410IJHN;ENOG410Z1UH	EOG09360IYM	PF04827
	TRINITY_DN49696_c0_g1_i1	tr|F0YCS4|F0YCS4_AURAN	Aureococcus anophagefferens (Harmful bloom alga)	AURANDRAFT_65124	ORFNames=AURANDRAFT_65124 {ECO:0000313|EMBL:EGB07130.1};	F0YCS4_AURAN	F0YCS4	Uncharacterized protein	SubName: Full=Uncharacterized protein {ECO:0000313|EMBL:EGB07130.1};	aaf:AURANDRAFT_65124	IPR019749;IPR014352;IPR035963;IPR019748;IPR000299;IPR000857;IPR011993;IPR000159;IPR029071;IPR001202;IPR036020	XP_009038359.1			PF00373;PF00784;PF00397	PS50057;PS51016;PS50200;PS01159;PS50020
	TRINITY_DN49696_c0_g1_i4	tr|F0YCS4|F0YCS4_AURAN	Aureococcus anophagefferens (Harmful bloom alga)	AURANDRAFT_65124	ORFNames=AURANDRAFT_65124 {ECO:0000313|EMBL:EGB07130.1};	F0YCS4_AURAN	F0YCS4	Uncharacterized protein	SubName: Full=Uncharacterized protein {ECO:0000313|EMBL:EGB07130.1};	aaf:AURANDRAFT_65124	IPR019749;IPR014352;IPR035963;IPR019748;IPR000299;IPR000857;IPR011993;IPR000159;IPR029071;IPR001202;IPR036020	XP_009038359.1			PF00373;PF00784;PF00397	PS50057;PS51016;PS50200;PS01159;PS50020
	TRINITY_DN49696_c0_g1_i2	tr|F0YCS4|F0YCS4_AURAN	Aureococcus anophagefferens (Harmful bloom alga)	AURANDRAFT_65124	ORFNames=AURANDRAFT_65124 {ECO:0000313|EMBL:EGB07130.1};	F0YCS4_AURAN	F0YCS4	Uncharacterized protein	SubName: Full=Uncharacterized protein {ECO:0000313|EMBL:EGB07130.1};	aaf:AURANDRAFT_65124	IPR019749;IPR014352;IPR035963;IPR019748;IPR000299;IPR000857;IPR011993;IPR000159;IPR029071;IPR001202;IPR036020	XP_009038359.1			PF00373;PF00784;PF00397	PS50057;PS51016;PS50200;PS01159;PS50020
	TRINITY_DN77439_c0_g1_i2	tr|H6SIC8|H6SIC8_PARPM	Pararhodospirillum photometricum DSM 122	RSPPHO_03264	ORFNames=RSPPHO_03264 {ECO:0000313|EMBL:CCG06603.1};	H6SIC8_PARPM	H6SIC8	Uncharacterized protein	SubName: Full=Uncharacterized protein {ECO:0000313|EMBL:CCG06603.1}; Flags: Fragment;	rpm:RSPPHO_03264				POG091H3H8X
	TRINITY_DN87895_c0_g1_i1	tr|A0A1S2XVA7|A0A1S2XVA7_CICAR	Cicer arietinum (Chickpea) (Garbanzo)	LOC101494142	Name=LOC101494142 {ECO:0000313|RefSeq:XP_004494492.1};	A0A1S2XVA7_CICAR	A0A1S2XVA7	cathepsin B-like	SubName: Full=cathepsin B-like {ECO:0000313|RefSeq:XP_004494492.1};	cam:101494142	IPR000169;IPR025660;IPR013128;IPR000668;IPR012599	XP_004494492.1			PF00112;PF08127	PS00139;PS00639	PTHR12411
	TRINITY_DN58034_c0_g1_i5	tr|A0A1S4BJC3|A0A1S4BJC3_TOBAC	Nicotiana tabacum (Common tobacco)	LOC107808907	Name=LOC107808907 {ECO:0000313|RefSeq:XP_016488954.1};	A0A1S4BJC3_TOBAC	A0A1S4BJC3	uncharacterized protein LOC107808907	SubName: Full=uncharacterized protein LOC107808907 {ECO:0000313|RefSeq:XP_016488954.1};	nta:107808907	IPR001025;IPR005162;IPR019786;IPR011011;IPR001965;IPR019787;IPR013083	XP_016488954.1			PF01426;PF00628;PF03732	PS51038;PS01359;PS50016
	TRINITY_DN58093_c0_g1_i2	tr|I1GZE3|I1GZE3_BRADI	Brachypodium distachyon (Purple false brome) (Trachynia distachya)	LOC100828046 BRADI_1g44690	Name=LOC100828046 {ECO:0000313|EnsemblPlants:BRADI1G44690.1}; ORFNames=BRADI_1g44690 {ECO:0000313|EMBL:KQK18789.1};	I1GZE3_BRADI	I1GZE3	Uncharacterized protein	SubName: Full=Uncharacterized protein {ECO:0000313|EMBL:KQK18789.1, ECO:0000313|EnsemblPlants:BRADI1G44690.1};	bdi:100828046	IPR033739;IPR024079;IPR001818;IPR021190;IPR006026;IPR002477;IPR036365	XP_003560867.1	KOG1565;ENOG410XQ5D	EOG09360DPA	PF00413;PF01471
	TRINITY_DN58093_c0_g1_i1	tr|I1GZE3|I1GZE3_BRADI	Brachypodium distachyon (Purple false brome) (Trachynia distachya)	LOC100828046 BRADI_1g44690	Name=LOC100828046 {ECO:0000313|EnsemblPlants:BRADI1G44690.1}; ORFNames=BRADI_1g44690 {ECO:0000313|EMBL:KQK18789.1};	I1GZE3_BRADI	I1GZE3	Uncharacterized protein	SubName: Full=Uncharacterized protein {ECO:0000313|EMBL:KQK18789.1, ECO:0000313|EnsemblPlants:BRADI1G44690.1};	bdi:100828046	IPR033739;IPR024079;IPR001818;IPR021190;IPR006026;IPR002477;IPR036365	XP_003560867.1	KOG1565;ENOG410XQ5D	EOG09360DPA	PF00413;PF01471
	TRINITY_DN2466_c0_g1_i1	tr|A0A072TKH6|A0A072TKH6_MEDTR	Medicago truncatula (Barrel medic) (Medicago tribuloides)	25479695 MTR_0021s0160	Name=25479695 {ECO:0000313|EnsemblPlants:KEH17348}; ORFNames=MTR_0021s0160 {ECO:0000313|EMBL:KEH17348.1};	A0A072TKH6_MEDTR	A0A072TKH6	Uncharacterized protein	SubName: Full=Uncharacterized protein {ECO:0000313|EMBL:KEH17348.1, ECO:0000313|EnsemblPlants:KEH17348};	mtr:MTR_0021s0160		XP_013443323.1
	TRINITY_DN2466_c0_g1_i13	tr|A0A072TKH6|A0A072TKH6_MEDTR	Medicago truncatula (Barrel medic) (Medicago tribuloides)	25479695 MTR_0021s0160	Name=25479695 {ECO:0000313|EnsemblPlants:KEH17348}; ORFNames=MTR_0021s0160 {ECO:0000313|EMBL:KEH17348.1};	A0A072TKH6_MEDTR	A0A072TKH6	Uncharacterized protein	SubName: Full=Uncharacterized protein {ECO:0000313|EMBL:KEH17348.1, ECO:0000313|EnsemblPlants:KEH17348};	mtr:MTR_0021s0160		XP_013443323.1
	TRINITY_DN2466_c0_g1_i20	tr|A0A072TKH6|A0A072TKH6_MEDTR	Medicago truncatula (Barrel medic) (Medicago tribuloides)	25479695 MTR_0021s0160	Name=25479695 {ECO:0000313|EnsemblPlants:KEH17348}; ORFNames=MTR_0021s0160 {ECO:0000313|EMBL:KEH17348.1};	A0A072TKH6_MEDTR	A0A072TKH6	Uncharacterized protein	SubName: Full=Uncharacterized protein {ECO:0000313|EMBL:KEH17348.1, ECO:0000313|EnsemblPlants:KEH17348};	mtr:MTR_0021s0160		XP_013443323.1
	TRINITY_DN2466_c0_g1_i27	tr|A0A072TKH6|A0A072TKH6_MEDTR	Medicago truncatula (Barrel medic) (Medicago tribuloides)	25479695 MTR_0021s0160	Name=25479695 {ECO:0000313|EnsemblPlants:KEH17348}; ORFNames=MTR_0021s0160 {ECO:0000313|EMBL:KEH17348.1};	A0A072TKH6_MEDTR	A0A072TKH6	Uncharacterized protein	SubName: Full=Uncharacterized protein {ECO:0000313|EMBL:KEH17348.1, ECO:0000313|EnsemblPlants:KEH17348};	mtr:MTR_0021s0160		XP_013443323.1
	TRINITY_DN2466_c0_g1_i25	tr|A0A072TKH6|A0A072TKH6_MEDTR	Medicago truncatula (Barrel medic) (Medicago tribuloides)	25479695 MTR_0021s0160	Name=25479695 {ECO:0000313|EnsemblPlants:KEH17348}; ORFNames=MTR_0021s0160 {ECO:0000313|EMBL:KEH17348.1};	A0A072TKH6_MEDTR	A0A072TKH6	Uncharacterized protein	SubName: Full=Uncharacterized protein {ECO:0000313|EMBL:KEH17348.1, ECO:0000313|EnsemblPlants:KEH17348};	mtr:MTR_0021s0160		XP_013443323.1
	TRINITY_DN2466_c0_g1_i26	tr|A0A072TKH6|A0A072TKH6_MEDTR	Medicago truncatula (Barrel medic) (Medicago tribuloides)	25479695 MTR_0021s0160	Name=25479695 {ECO:0000313|EnsemblPlants:KEH17348}; ORFNames=MTR_0021s0160 {ECO:0000313|EMBL:KEH17348.1};	A0A072TKH6_MEDTR	A0A072TKH6	Uncharacterized protein	SubName: Full=Uncharacterized protein {ECO:0000313|EMBL:KEH17348.1, ECO:0000313|EnsemblPlants:KEH17348};	mtr:MTR_0021s0160		XP_013443323.1
	TRINITY_DN2466_c0_g1_i2	tr|A0A072TKH6|A0A072TKH6_MEDTR	Medicago truncatula (Barrel medic) (Medicago tribuloides)	25479695 MTR_0021s0160	Name=25479695 {ECO:0000313|EnsemblPlants:KEH17348}; ORFNames=MTR_0021s0160 {ECO:0000313|EMBL:KEH17348.1};	A0A072TKH6_MEDTR	A0A072TKH6	Uncharacterized protein	SubName: Full=Uncharacterized protein {ECO:0000313|EMBL:KEH17348.1, ECO:0000313|EnsemblPlants:KEH17348};	mtr:MTR_0021s0160		XP_013443323.1
	TRINITY_DN2466_c0_g1_i9	tr|A0A072TKH6|A0A072TKH6_MEDTR	Medicago truncatula (Barrel medic) (Medicago tribuloides)	25479695 MTR_0021s0160	Name=25479695 {ECO:0000313|EnsemblPlants:KEH17348}; ORFNames=MTR_0021s0160 {ECO:0000313|EMBL:KEH17348.1};	A0A072TKH6_MEDTR	A0A072TKH6	Uncharacterized protein	SubName: Full=Uncharacterized protein {ECO:0000313|EMBL:KEH17348.1, ECO:0000313|EnsemblPlants:KEH17348};	mtr:MTR_0021s0160		XP_013443323.1
	TRINITY_DN2466_c0_g1_i15	tr|A0A072TKH6|A0A072TKH6_MEDTR	Medicago truncatula (Barrel medic) (Medicago tribuloides)	25479695 MTR_0021s0160	Name=25479695 {ECO:0000313|EnsemblPlants:KEH17348}; ORFNames=MTR_0021s0160 {ECO:0000313|EMBL:KEH17348.1};	A0A072TKH6_MEDTR	A0A072TKH6	Uncharacterized protein	SubName: Full=Uncharacterized protein {ECO:0000313|EMBL:KEH17348.1, ECO:0000313|EnsemblPlants:KEH17348};	mtr:MTR_0021s0160		XP_013443323.1
	TRINITY_DN2466_c0_g1_i10	tr|A0A072TKH6|A0A072TKH6_MEDTR	Medicago truncatula (Barrel medic) (Medicago tribuloides)	25479695 MTR_0021s0160	Name=25479695 {ECO:0000313|EnsemblPlants:KEH17348}; ORFNames=MTR_0021s0160 {ECO:0000313|EMBL:KEH17348.1};	A0A072TKH6_MEDTR	A0A072TKH6	Uncharacterized protein	SubName: Full=Uncharacterized protein {ECO:0000313|EMBL:KEH17348.1, ECO:0000313|EnsemblPlants:KEH17348};	mtr:MTR_0021s0160		XP_013443323.1
	TRINITY_DN2466_c0_g1_i24	tr|A0A072TKH6|A0A072TKH6_MEDTR	Medicago truncatula (Barrel medic) (Medicago tribuloides)	25479695 MTR_0021s0160	Name=25479695 {ECO:0000313|EnsemblPlants:KEH17348}; ORFNames=MTR_0021s0160 {ECO:0000313|EMBL:KEH17348.1};	A0A072TKH6_MEDTR	A0A072TKH6	Uncharacterized protein	SubName: Full=Uncharacterized protein {ECO:0000313|EMBL:KEH17348.1, ECO:0000313|EnsemblPlants:KEH17348};	mtr:MTR_0021s0160		XP_013443323.1
	TRINITY_DN2466_c0_g1_i5	tr|A0A072TKH6|A0A072TKH6_MEDTR	Medicago truncatula (Barrel medic) (Medicago tribuloides)	25479695 MTR_0021s0160	Name=25479695 {ECO:0000313|EnsemblPlants:KEH17348}; ORFNames=MTR_0021s0160 {ECO:0000313|EMBL:KEH17348.1};	A0A072TKH6_MEDTR	A0A072TKH6	Uncharacterized protein	SubName: Full=Uncharacterized protein {ECO:0000313|EMBL:KEH17348.1, ECO:0000313|EnsemblPlants:KEH17348};	mtr:MTR_0021s0160		XP_013443323.1
	TRINITY_DN2466_c0_g1_i18	tr|A0A072TKH6|A0A072TKH6_MEDTR	Medicago truncatula (Barrel medic) (Medicago tribuloides)	25479695 MTR_0021s0160	Name=25479695 {ECO:0000313|EnsemblPlants:KEH17348}; ORFNames=MTR_0021s0160 {ECO:0000313|EMBL:KEH17348.1};	A0A072TKH6_MEDTR	A0A072TKH6	Uncharacterized protein	SubName: Full=Uncharacterized protein {ECO:0000313|EMBL:KEH17348.1, ECO:0000313|EnsemblPlants:KEH17348};	mtr:MTR_0021s0160		XP_013443323.1
	TRINITY_DN2466_c0_g1_i8	tr|A0A072TKH6|A0A072TKH6_MEDTR	Medicago truncatula (Barrel medic) (Medicago tribuloides)	25479695 MTR_0021s0160	Name=25479695 {ECO:0000313|EnsemblPlants:KEH17348}; ORFNames=MTR_0021s0160 {ECO:0000313|EMBL:KEH17348.1};	A0A072TKH6_MEDTR	A0A072TKH6	Uncharacterized protein	SubName: Full=Uncharacterized protein {ECO:0000313|EMBL:KEH17348.1, ECO:0000313|EnsemblPlants:KEH17348};	mtr:MTR_0021s0160		XP_013443323.1
	TRINITY_DN2466_c3_g1_i1	tr|A0A1S3EIQ5|A0A1S3EIQ5_CICAR	Cicer arietinum (Chickpea) (Garbanzo)	LOC105852951	Name=LOC105852951 {ECO:0000313|RefSeq:XP_012575293.1};	A0A1S3EIQ5_CICAR	A0A1S3EIQ5	uncharacterized protein LOC105852951	SubName: Full=uncharacterized protein LOC105852951 {ECO:0000313|RefSeq:XP_012575293.1};	cam:105852951		XP_012575293.1
	TRINITY_DN2466_c3_g1_i2	tr|A0A1S3EIQ5|A0A1S3EIQ5_CICAR	Cicer arietinum (Chickpea) (Garbanzo)	LOC105852951	Name=LOC105852951 {ECO:0000313|RefSeq:XP_012575293.1};	A0A1S3EIQ5_CICAR	A0A1S3EIQ5	uncharacterized protein LOC105852951	SubName: Full=uncharacterized protein LOC105852951 {ECO:0000313|RefSeq:XP_012575293.1};	cam:105852951		XP_012575293.1
	TRINITY_DN2422_c0_g1_i2	tr|K3YSS9|K3YSS9_SETIT	Setaria italica (Foxtail millet) (Panicum italicum)	LOC101768297 SETIT_017324mg	Name=LOC101768297 {ECO:0000313|EnsemblPlants:Si017324m}; ORFNames=SETIT_017324mg {ECO:0000313|EMBL:KQL29472.1};	K3YSS9_SETIT	K3YSS9	Uncharacterized protein	SubName: Full=Uncharacterized protein {ECO:0000313|EMBL:KQL29472.1, ECO:0000313|EnsemblPlants:Si017324m};	sita:101768297	IPR005937;IPR003593;IPR003959;IPR003960;IPR027417;IPR035256	XP_004952381.1	KOG0727;COG1222	EOG09360AE8	PF00004	PS00674	PTHR23073:SF8	TIGR01242
	TRINITY_DN2422_c0_g1_i13	tr|K3YSS9|K3YSS9_SETIT	Setaria italica (Foxtail millet) (Panicum italicum)	LOC101768297 SETIT_017324mg	Name=LOC101768297 {ECO:0000313|EnsemblPlants:Si017324m}; ORFNames=SETIT_017324mg {ECO:0000313|EMBL:KQL29472.1};	K3YSS9_SETIT	K3YSS9	Uncharacterized protein	SubName: Full=Uncharacterized protein {ECO:0000313|EMBL:KQL29472.1, ECO:0000313|EnsemblPlants:Si017324m};	sita:101768297	IPR005937;IPR003593;IPR003959;IPR003960;IPR027417;IPR035256	XP_004952381.1	KOG0727;COG1222	EOG09360AE8	PF00004	PS00674	PTHR23073:SF8	TIGR01242
	TRINITY_DN2480_c0_g1_i1	tr|Q10P12|Q10P12_ORYSJ	Oryza sativa subsp. japonica (Rice)	Os03g0251500 LOC_Os03g14690, Os03g0251500 OsJ_10160, OSNPB_030251500	Name=Os03g0251500 {ECO:0000313|EMBL:BAS83290.1}; OrderedLocusNames=LOC_Os03g14690 {ECO:0000313|EMBL:ABF94992.1}, Os03g0251500 {ECO:0000313|EMBL:BAF11486.1}; ORFNames=OsJ_10160 {ECO:0000313|EMBL:EAZ26290.1}, OSNPB_030251500 {ECO:0000313|EMBL:BAS83290.1};	Q10P12_ORYSJ	Q10P12	V-type proton ATPase subunit a	RecName: Full=V-type proton ATPase subunit a {ECO:0000256|RuleBase:RU361189};	osa:4332270	IPR002490;IPR026028	XP_015632819.1	KOG2189;COG1269	EOG093602BG	PF01496		PTHR11629
	TRINITY_DN527_c0_g1_i1	tr|I1H0C6|I1H0C6_BRADI	Brachypodium distachyon (Purple false brome) (Trachynia distachya)	LOC100824146 BRADI_1g47350	Name=LOC100824146 {ECO:0000313|EnsemblPlants:BRADI1G47350.1}; ORFNames=BRADI_1g47350 {ECO:0000313|EMBL:KQK19280.1};	I1H0C6_BRADI	I1H0C6	Uncharacterized protein	SubName: Full=Uncharacterized protein {ECO:0000313|EMBL:KQK19280.1, ECO:0000313|EnsemblPlants:BRADI1G47350.1};	bdi:100824146	IPR011598;IPR036638	XP_003560994.1	ENOG410IJFP;ENOG4111MVP	EOG09360JIL	PF00010	PS50888
	TRINITY_DN45141_c0_g2_i2	tr|A0A1D6MDH9|A0A1D6MDH9_MAIZE	Zea mays (Maize)	103630759 ZEAMMB73_Zm00001d039086	Name=103630759 {ECO:0000313|EnsemblPlants:Zm00001d039086_P001}; ORFNames=ZEAMMB73_Zm00001d039086 {ECO:0000313|EMBL:AQK88707.1};	A0A1D6MDH9_MAIZE	A0A1D6MDH9	Tetratricopeptide repeat (TPR)-like superfamily protein	SubName: Full=Tetratricopeptide repeat (TPR)-like superfamily protein {ECO:0000313|EMBL:AQK88707.1};	zma:103630759		XP_008650045.1
	TRINITY_DN45142_c0_g1_i5	tr|I1J255|I1J255_BRADI	Brachypodium distachyon (Purple false brome) (Trachynia distachya)	LOC100832295 BRADI_5g22700	Name=LOC100832295 {ECO:0000313|EnsemblPlants:BRADI5G22700.1}; ORFNames=BRADI_5g22700 {ECO:0000313|EMBL:KQJ84771.1};	I1J255_BRADI	I1J255	Uncharacterized protein	SubName: Full=Uncharacterized protein {ECO:0000313|EMBL:KQJ84771.1, ECO:0000313|EnsemblPlants:BRADI5G22700.1};	bdi:100832295	IPR026728;IPR026854	XP_003580605.1	KOG2955;ENOG410XQGP	EOG093600N9	PF12624		PTHR22774
	TRINITY_DN45110_c0_g2_i1	tr|A0A1S2Z724|A0A1S2Z724_CICAR	Cicer arietinum (Chickpea) (Garbanzo)	LOC101490162	Name=LOC101490162 {ECO:0000313|RefSeq:XP_004516207.1};	A0A1S2Z724_CICAR	A0A1S2Z724	ubiquitin-conjugating enzyme E2 28-like	SubName: Full=ubiquitin-conjugating enzyme E2 28-like {ECO:0000313|RefSeq:XP_004516207.1};	cam:101490162	IPR000608;IPR023313;IPR016135	XP_004516207.1			PF00179	PS00183;PS50127
	TRINITY_DN45110_c0_g1_i2	tr|M2XRN0|M2XRN0_GALSU	Galdieria sulphuraria (Red alga)	Gasu_60520	ORFNames=Gasu_60520 {ECO:0000313|EMBL:EME26323.1};	M2XRN0_GALSU	M2XRN0	Ubiquitin-conjugating enzyme E2	SubName: Full=Ubiquitin-conjugating enzyme E2 {ECO:0000313|EMBL:EME26323.1}; EC=6.3.2.19 {ECO:0000313|EMBL:EME26323.1};	gsl:Gasu_60520	IPR000608;IPR023313;IPR016135	XP_005702843.1			PF00179	PS00183;PS50127
	TRINITY_DN45110_c0_g1_i3	tr|A9UR38|A9UR38_MONBE	Monosiga brevicollis (Choanoflagellate)	17710	ORFNames=17710 {ECO:0000313|EMBL:EDQ92181.1};	A9UR38_MONBE	A9UR38	Predicted protein	SubName: Full=Predicted protein {ECO:0000313|EMBL:EDQ92181.1};	mbr:MONBRDRAFT_17710	IPR000608;IPR023313;IPR016135	XP_001743467.1	KOG0417;COG5078		PF00179	PS00183;PS50127
	TRINITY_DN99964_c0_g1_i1	tr|B9RYF4|B9RYF4_RICCO	Ricinus communis (Castor bean)	RCOM_0812680	ORFNames=RCOM_0812680 {ECO:0000313|EMBL:EEF43663.1};	B9RYF4_RICCO	B9RYF4	Ribosomal protein S9, putative	SubName: Full=Ribosomal protein S9, putative {ECO:0000313|EMBL:EEF43663.1};	rcu:8288339	IPR020568;IPR014721;IPR000754;IPR020574	XP_002518738.1			PF00380	PS00360	PTHR21569
	TRINITY_DN5991_c1_g3_i2	tr|B4FE47|B4FE47_MAIZE	Zea mays (Maize)	LOB14 100193187 ZEAMMB73_Zm00001d029601	Name=LOB14 {ECO:0000313|EMBL:AIB05123.1}; Synonyms=100193187 {ECO:0000313|EnsemblPlants:Zm00001d029601_P003}; ORFNames=ZEAMMB73_Zm00001d029601 {ECO:0000313|EMBL:ONL99076.1};	B4FE47_MAIZE	B4FE47	LOB domain-containing protein 38; LOB transcription factor	SubName: Full=LOB domain-containing protein 38 {ECO:0000313|EMBL:ONL99076.1}; SubName: Full=LOB transcription factor {ECO:0000313|EMBL:AIB05123.1};	zma:100193187	IPR004883	NP_001131814.1	ENOG410JTSJ;ENOG41107JS	EOG09361C4P	PF03195	PS50891
	TRINITY_DN5909_c0_g1_i3	tr|I1GSF1|I1GSF1_BRADI	Brachypodium distachyon (Purple false brome) (Trachynia distachya)	LOC100830083 BRADI_1g21620	Name=LOC100830083 {ECO:0000313|EnsemblPlants:BRADI1G21620.2}; ORFNames=BRADI_1g21620 {ECO:0000313|EMBL:KQK15279.1};	I1GSF1_BRADI	I1GSF1	Uncharacterized protein	SubName: Full=Uncharacterized protein {ECO:0000313|EMBL:KQK15279.1, ECO:0000313|EnsemblPlants:BRADI1G21620.2};	bdi:100830083	IPR011989;IPR016024;IPR013598	XP_010235692.1	KOG2021;ENOG410XZDZ	EOG093601Y5	PF08389
	TRINITY_DN5909_c0_g1_i5	tr|I1GSF1|I1GSF1_BRADI	Brachypodium distachyon (Purple false brome) (Trachynia distachya)	LOC100830083 BRADI_1g21620	Name=LOC100830083 {ECO:0000313|EnsemblPlants:BRADI1G21620.2}; ORFNames=BRADI_1g21620 {ECO:0000313|EMBL:KQK15279.1};	I1GSF1_BRADI	I1GSF1	Uncharacterized protein	SubName: Full=Uncharacterized protein {ECO:0000313|EMBL:KQK15279.1, ECO:0000313|EnsemblPlants:BRADI1G21620.2};	bdi:100830083	IPR011989;IPR016024;IPR013598	XP_010235692.1	KOG2021;ENOG410XZDZ	EOG093601Y5	PF08389
	TRINITY_DN5909_c0_g1_i2	tr|I1GSF1|I1GSF1_BRADI	Brachypodium distachyon (Purple false brome) (Trachynia distachya)	LOC100830083 BRADI_1g21620	Name=LOC100830083 {ECO:0000313|EnsemblPlants:BRADI1G21620.2}; ORFNames=BRADI_1g21620 {ECO:0000313|EMBL:KQK15279.1};	I1GSF1_BRADI	I1GSF1	Uncharacterized protein	SubName: Full=Uncharacterized protein {ECO:0000313|EMBL:KQK15279.1, ECO:0000313|EnsemblPlants:BRADI1G21620.2};	bdi:100830083	IPR011989;IPR016024;IPR013598	XP_010235692.1	KOG2021;ENOG410XZDZ	EOG093601Y5	PF08389
	TRINITY_DN5971_c0_g1_i3	tr|I1HE00|I1HE00_BRADI	Brachypodium distachyon (Purple false brome) (Trachynia distachya)	LOC100834596 BRADI_2g09070	Name=LOC100834596 {ECO:0000313|EnsemblPlants:BRADI2G09070.1}; ORFNames=BRADI_2g09070 {ECO:0000313|EMBL:KQK03638.1};	I1HE00_BRADI	I1HE00	Uncharacterized protein	SubName: Full=Uncharacterized protein {ECO:0000313|EMBL:KQK03638.1, ECO:0000313|EnsemblPlants:BRADI2G09070.1};	bdi:100834596	IPR027417;IPR005225;IPR006689;IPR006687	XP_003566433.1	KOG0077;ENOG410YIKI	EOG09360PEB	PF00025	PS51422		TIGR00231
	TRINITY_DN5954_c0_g2_i1	tr|I1H9S3|I1H9S3_BRADI	Brachypodium distachyon (Purple false brome) (Trachynia distachya)	LOC100840494 BRADI_1g75280	Name=LOC100840494 {ECO:0000313|EnsemblPlants:BRADI1G75280.2}; ORFNames=BRADI_1g75280 {ECO:0000313|EMBL:KQK23666.1};	I1H9S3_BRADI	I1H9S3	Cyclin-dependent kinases regulatory subunit	RecName: Full=Cyclin-dependent kinases regulatory subunit {ECO:0000256|RuleBase:RU311113};	bdi:100840494	IPR000789;IPR036858	XP_010229218.1;XP_010229219.1	KOG3484;ENOG4111UAN	EOG09360WQ4	PF01111	PS00944
	TRINITY_DN5983_c0_g1_i7	tr|I1GKW1|I1GKW1_BRADI	Brachypodium distachyon (Purple false brome) (Trachynia distachya)	LOC100823545 BRADI_1g01710	Name=LOC100823545 {ECO:0000313|EnsemblPlants:BRADI1G01710.1}; ORFNames=BRADI_1g01710 {ECO:0000313|EMBL:KQK12118.1};	I1GKW1_BRADI	I1GKW1	Actin-related protein 2/3 complex subunit 4	RecName: Full=Actin-related protein 2/3 complex subunit 4 {ECO:0000256|PIRNR:PIRNR039100};	bdi:100823545	IPR034666;IPR008384	XP_003562343.1	KOG1876;ENOG4111G2F	EOG09360OUS	PF05856		PTHR22629
	TRINITY_DN52165_c0_g1_i2	tr|F4Q934|F4Q934_DICFS	Dictyostelium fasciculatum (strain SH3) (Slime mold)	DFA_10033	ORFNames=DFA_10033 {ECO:0000313|EMBL:EGG15203.1};	F4Q934_DICFS	F4Q934	Protein phosphatase 2C-related protein	SubName: Full=Protein phosphatase 2C-related protein {ECO:0000313|EMBL:EGG15203.1};	dfa:DFA_10033	IPR015655;IPR000222;IPR036457;IPR001932	XP_004351923.1			PF00481	PS01032;PS51746	PTHR13832
	TRINITY_DN52103_c0_g1_i2	sp|Q04740|RNH1_YEAST	Saccharomyces cerevisiae (strain ATCC 204508 / S288c) (Baker's yeast)	RNH1 YMR234W YM9959.16	Name=RNH1; OrderedLocusNames=YMR234W; ORFNames=YM9959.16;	RNH1_YEAST	Q04740	Ribonuclease H; RNase H	RecName: Full=Ribonuclease H; Short=RNase H; EC=3.1.26.4;	sce:YMR234W	IPR009027;IPR017067;IPR011320;IPR037056;IPR012337;IPR002156;IPR036397	NP_013961.1		EOG092C42S8	PF01693;PF00075	PS50879
	TRINITY_DN70793_c0_g2_i1	tr|Q1ZZQ1|Q1ZZQ1_ACYPI	Acyrthosiphon pisum (Pea aphid)	Rpl12 ACYPI000059	Name=Rpl12 {ECO:0000313|EnsemblMetazoa:ACYPI000059-PA}; Synonyms=ACYPI000059 {ECO:0000313|EMBL:BAH70782.1};	Q1ZZQ1_ACYPI	Q1ZZQ1	ACYPI000059 protein; Putative ribosomal protein L12e	SubName: Full=ACYPI000059 protein {ECO:0000313|EMBL:BAH70782.1}; SubName: Full=Putative ribosomal protein L12e {ECO:0000313|EMBL:ABD76372.1};	api:100144916	IPR000911;IPR036796;IPR020783;IPR036769;IPR020785;IPR020784	NP_001119643.1	KOG0886;COG0080		PF00298;PF03946	PS00359	PTHR11661
	TRINITY_DN70741_c0_g5_i1	tr|I0Z918|I0Z918_COCSC	Coccomyxa subellipsoidea (strain C-169) (Green microalga)	COCSUDRAFT_64083	ORFNames=COCSUDRAFT_64083 {ECO:0000313|EMBL:EIE27137.1};	I0Z918_COCSC	I0Z918	Binding protein 1	SubName: Full=Binding protein 1 {ECO:0000313|EMBL:EIE27137.1};	csl:COCSUDRAFT_64083	IPR018181;IPR029048;IPR029047;IPR013126	XP_005651681.1			PF00012	PS00297;PS00329;PS01036
	TRINITY_DN959_c1_g1_i7	tr|I1HWR8|I1HWR8_BRADI	Brachypodium distachyon (Purple false brome) (Trachynia distachya)	LOC100836785 BRADI_3g02620	Name=LOC100836785 {ECO:0000313|EnsemblPlants:BRADI3G02620.1}; ORFNames=BRADI_3g02620 {ECO:0000313|EMBL:KQJ93077.1};	I1HWR8_BRADI	I1HWR8	Uncharacterized protein	SubName: Full=Uncharacterized protein {ECO:0000313|EMBL:KQJ93077.1, ECO:0000313|EnsemblPlants:BRADI3G02620.1};	bdi:100836785	IPR001163;IPR010920;IPR027078	XP_003573886.1	KOG1774;COG1958	EOG09360STR	PF01423		PTHR11193
	TRINITY_DN959_c1_g1_i2	tr|I1HWR8|I1HWR8_BRADI	Brachypodium distachyon (Purple false brome) (Trachynia distachya)	LOC100836785 BRADI_3g02620	Name=LOC100836785 {ECO:0000313|EnsemblPlants:BRADI3G02620.1}; ORFNames=BRADI_3g02620 {ECO:0000313|EMBL:KQJ93077.1};	I1HWR8_BRADI	I1HWR8	Uncharacterized protein	SubName: Full=Uncharacterized protein {ECO:0000313|EMBL:KQJ93077.1, ECO:0000313|EnsemblPlants:BRADI3G02620.1};	bdi:100836785	IPR001163;IPR010920;IPR027078	XP_003573886.1	KOG1774;COG1958	EOG09360STR	PF01423		PTHR11193
	TRINITY_DN959_c1_g1_i5	tr|I1HWR8|I1HWR8_BRADI	Brachypodium distachyon (Purple false brome) (Trachynia distachya)	LOC100836785 BRADI_3g02620	Name=LOC100836785 {ECO:0000313|EnsemblPlants:BRADI3G02620.1}; ORFNames=BRADI_3g02620 {ECO:0000313|EMBL:KQJ93077.1};	I1HWR8_BRADI	I1HWR8	Uncharacterized protein	SubName: Full=Uncharacterized protein {ECO:0000313|EMBL:KQJ93077.1, ECO:0000313|EnsemblPlants:BRADI3G02620.1};	bdi:100836785	IPR001163;IPR010920;IPR027078	XP_003573886.1	KOG1774;COG1958	EOG09360STR	PF01423		PTHR11193
	TRINITY_DN959_c1_g1_i9	tr|I1HWR8|I1HWR8_BRADI	Brachypodium distachyon (Purple false brome) (Trachynia distachya)	LOC100836785 BRADI_3g02620	Name=LOC100836785 {ECO:0000313|EnsemblPlants:BRADI3G02620.1}; ORFNames=BRADI_3g02620 {ECO:0000313|EMBL:KQJ93077.1};	I1HWR8_BRADI	I1HWR8	Uncharacterized protein	SubName: Full=Uncharacterized protein {ECO:0000313|EMBL:KQJ93077.1, ECO:0000313|EnsemblPlants:BRADI3G02620.1};	bdi:100836785	IPR001163;IPR010920;IPR027078	XP_003573886.1	KOG1774;COG1958	EOG09360STR	PF01423		PTHR11193
	TRINITY_DN959_c1_g1_i8	tr|I1HWR8|I1HWR8_BRADI	Brachypodium distachyon (Purple false brome) (Trachynia distachya)	LOC100836785 BRADI_3g02620	Name=LOC100836785 {ECO:0000313|EnsemblPlants:BRADI3G02620.1}; ORFNames=BRADI_3g02620 {ECO:0000313|EMBL:KQJ93077.1};	I1HWR8_BRADI	I1HWR8	Uncharacterized protein	SubName: Full=Uncharacterized protein {ECO:0000313|EMBL:KQJ93077.1, ECO:0000313|EnsemblPlants:BRADI3G02620.1};	bdi:100836785	IPR001163;IPR010920;IPR027078	XP_003573886.1	KOG1774;COG1958	EOG09360STR	PF01423		PTHR11193
	TRINITY_DN959_c1_g1_i4	tr|I1HWR8|I1HWR8_BRADI	Brachypodium distachyon (Purple false brome) (Trachynia distachya)	LOC100836785 BRADI_3g02620	Name=LOC100836785 {ECO:0000313|EnsemblPlants:BRADI3G02620.1}; ORFNames=BRADI_3g02620 {ECO:0000313|EMBL:KQJ93077.1};	I1HWR8_BRADI	I1HWR8	Uncharacterized protein	SubName: Full=Uncharacterized protein {ECO:0000313|EMBL:KQJ93077.1, ECO:0000313|EnsemblPlants:BRADI3G02620.1};	bdi:100836785	IPR001163;IPR010920;IPR027078	XP_003573886.1	KOG1774;COG1958	EOG09360STR	PF01423		PTHR11193
	TRINITY_DN959_c1_g1_i6	tr|I1HWR8|I1HWR8_BRADI	Brachypodium distachyon (Purple false brome) (Trachynia distachya)	LOC100836785 BRADI_3g02620	Name=LOC100836785 {ECO:0000313|EnsemblPlants:BRADI3G02620.1}; ORFNames=BRADI_3g02620 {ECO:0000313|EMBL:KQJ93077.1};	I1HWR8_BRADI	I1HWR8	Uncharacterized protein	SubName: Full=Uncharacterized protein {ECO:0000313|EMBL:KQJ93077.1, ECO:0000313|EnsemblPlants:BRADI3G02620.1};	bdi:100836785	IPR001163;IPR010920;IPR027078	XP_003573886.1	KOG1774;COG1958	EOG09360STR	PF01423		PTHR11193
	TRINITY_DN959_c1_g1_i1	tr|I1HWR8|I1HWR8_BRADI	Brachypodium distachyon (Purple false brome) (Trachynia distachya)	LOC100836785 BRADI_3g02620	Name=LOC100836785 {ECO:0000313|EnsemblPlants:BRADI3G02620.1}; ORFNames=BRADI_3g02620 {ECO:0000313|EMBL:KQJ93077.1};	I1HWR8_BRADI	I1HWR8	Uncharacterized protein	SubName: Full=Uncharacterized protein {ECO:0000313|EMBL:KQJ93077.1, ECO:0000313|EnsemblPlants:BRADI3G02620.1};	bdi:100836785	IPR001163;IPR010920;IPR027078	XP_003573886.1	KOG1774;COG1958	EOG09360STR	PF01423		PTHR11193
	TRINITY_DN959_c1_g1_i3	tr|I1HWR8|I1HWR8_BRADI	Brachypodium distachyon (Purple false brome) (Trachynia distachya)	LOC100836785 BRADI_3g02620	Name=LOC100836785 {ECO:0000313|EnsemblPlants:BRADI3G02620.1}; ORFNames=BRADI_3g02620 {ECO:0000313|EMBL:KQJ93077.1};	I1HWR8_BRADI	I1HWR8	Uncharacterized protein	SubName: Full=Uncharacterized protein {ECO:0000313|EMBL:KQJ93077.1, ECO:0000313|EnsemblPlants:BRADI3G02620.1};	bdi:100836785	IPR001163;IPR010920;IPR027078	XP_003573886.1	KOG1774;COG1958	EOG09360STR	PF01423		PTHR11193
	TRINITY_DN926_c1_g1_i1	sp|P50158|TBP1_MAIZE	Zea mays (Maize)	TBP1	Name=TBP1;	TBP1_MAIZE	P50158	TATA-box-binding protein 1; TATA sequence-binding protein 1; TBP-1; TATA-binding factor 1; TATA-box factor 1; Transcription initiation factor TFIID TBP-1 subunit	RecName: Full=TATA-box-binding protein 1; AltName: Full=TATA sequence-binding protein 1; Short=TBP-1; AltName: Full=TATA-binding factor 1; AltName: Full=TATA-box factor 1; AltName: Full=Transcription initiation factor TFIID TBP-1 subunit;	zma:542240	IPR000814;IPR030491;IPR033710	NP_001105318.1	KOG3302;COG2101		PF00352	PS00351	PTHR10126
	TRINITY_DN961_c2_g1_i1	tr|A0A1S2YZ76|A0A1S2YZ76_CICAR	Cicer arietinum (Chickpea) (Garbanzo)	LOC101494971	Name=LOC101494971 {ECO:0000313|RefSeq:XP_004512258.1};	A0A1S2YZ76_CICAR	A0A1S2YZ76	60S ribosomal protein L10-like	SubName: Full=60S ribosomal protein L10-like {ECO:0000313|RefSeq:XP_004512258.1};	cam:101494971	IPR001197;IPR016180;IPR036920;IPR018255	XP_004512258.1			PF00252	PS01257	PTHR11726	TIGR00279
	TRINITY_DN977_c0_g1_i5	tr|I1H303|I1H303_BRADI	Brachypodium distachyon (Purple false brome) (Trachynia distachya)	LOC100827607 BRADI_1g55180	Name=LOC100827607 {ECO:0000313|EnsemblPlants:BRADI1G55180.3}; ORFNames=BRADI_1g55180 {ECO:0000313|EMBL:KQK20539.1};	I1H303_BRADI	I1H303	Uncharacterized protein	SubName: Full=Uncharacterized protein {ECO:0000313|EMBL:KQK20539.1, ECO:0000313|EnsemblPlants:BRADI1G55180.3};	bdi:100827607	IPR003425	XP_003557462.1;XP_010228265.1;XP_014753288.1	ENOG410IX82;COG0762	EOG09360PY8	PF02325		PTHR33219
	TRINITY_DN74144_c0_g1_i1	tr|C1N175|C1N175_MICPC	Micromonas pusilla (strain CCMP1545) (Picoplanktonic green alga)	MICPUCDRAFT_51289	ORFNames=MICPUCDRAFT_51289 {ECO:0000313|EMBL:EEH54393.1};	C1N175_MICPC	C1N175	Predicted protein	SubName: Full=Predicted protein {ECO:0000313|EMBL:EEH54393.1};	mpp:MICPUCDRAFT_51289	IPR007347	XP_003061763.1			PF04232		PTHR35331
	TRINITY_DN74133_c0_g1_i2	tr|G5AJC7|G5AJC7_PHYSP	Phytophthora sojae (strain P6497) (Soybean stem and root rot agent) (Phytophthora megasperma f. sp. glycines)	PHYSODRAFT_334333, PHYSODRAFT_536551	ORFNames=PHYSODRAFT_334333 {ECO:0000313|EMBL:EGZ16146.1}, PHYSODRAFT_536551 {ECO:0000313|EMBL:EGZ04371.1};	G5AJC7_PHYSP	G5AJC7	Uncharacterized protein	SubName: Full=Uncharacterized protein {ECO:0000313|EMBL:EGZ04371.1};	psoj:PHYSODRAFT_334333;psoj:PHYSODRAFT_536551	IPR007667	XP_009529895.1;XP_009540178.1			PF04588	PS51503
	TRINITY_DN74133_c0_g1_i1	tr|Q17CX4|Q17CX4_AEDAE	Aedes aegypti (Yellowfever mosquito) (Culex aegypti)	AAEL004404	ORFNames=AAEL004404 {ECO:0000313|EMBL:EAT44199.1};	Q17CX4_AEDAE	Q17CX4	AAEL004404-PA; HIG1 domain family member 2A, putative	SubName: Full=AAEL004404-PA {ECO:0000313|EMBL:EAT44199.1}; SubName: Full=HIG1 domain family member 2A, putative {ECO:0000313|VectorBase:AAEL004404-PA};	aag:5564724	IPR007667	XP_001649065.1	KOG4431;ENOG41121ET	EOG091G166Q	PF04588	PS51503
	TRINITY_DN74117_c0_g2_i1	tr|Q7XVH0|Q7XVH0_ORYSJ	Oryza sativa subsp. japonica (Rice)	Os04g0412800 OJ000126_13.3, OsJ_14734, OSJNBa0073L04.11, OSNPB_040412800	OrderedLocusNames=Os04g0412800 {ECO:0000313|EMBL:BAF14657.1}; ORFNames=OJ000126_13.3 {ECO:0000313|EMBL:CAD40594.2}, OsJ_14734 {ECO:0000313|EMBL:EAZ30676.1}, OSJNBa0073L04.11 {ECO:0000313|EMBL:CAD40652.2}, OSNPB_040412800 {ECO:0000313|EMBL:BAS89129.1};	Q7XVH0_ORYSJ	Q7XVH0	OJ000126_13.3 protein; OSJNBa0073L04.11 protein; Os04g0412800 protein; cDNA clone:001-019-B12, full insert sequence	SubName: Full=OJ000126_13.3 protein {ECO:0000313|EMBL:CAD40594.2}; SubName: Full=OSJNBa0073L04.11 protein {ECO:0000313|EMBL:CAD40652.2}; SubName: Full=Os04g0412800 protein {ECO:0000313|EMBL:BAF14657.1}; SubName: Full=cDNA clone:001-019-B12, full insert sequence {ECO:0000313|EMBL:BAG87472.1};	osa:4335785	IPR002109;IPR036249	XP_015635004.1	KOG2824;ENOG4111HAI	EOG09360FIY	PF00462	PS51354
	TRINITY_DN74132_c0_g1_i1	tr|A0A1S2XFX7|A0A1S2XFX7_CICAR	Cicer arietinum (Chickpea) (Garbanzo)	LOC101506568	Name=LOC101506568 {ECO:0000313|RefSeq:XP_004488762.1};	A0A1S2XFX7_CICAR	A0A1S2XFX7	Phosphoglycerate kinase	RecName: Full=Phosphoglycerate kinase {ECO:0000256|RuleBase:RU000532}; EC=2.7.2.3 {ECO:0000256|RuleBase:RU000532};	cam:101506568	IPR001576;IPR015911;IPR015824;IPR036043	XP_004488762.1			PF00162	PS00111	PTHR11406
	TRINITY_DN74185_c0_g1_i2	tr|Q4D4S1|Q4D4S1_TRYCC	Trypanosoma cruzi (strain CL Brener)	Tc00.1047053504163.30, Tc00.1047053506401.120	ORFNames=Tc00.1047053504163.30 {ECO:0000313|EMBL:EAN87517.1}, Tc00.1047053506401.120 {ECO:0000313|EMBL:EAN99415.1};	Q4D4S1_TRYCC	Q4D4S1	40S ribosomal protein S9, putative	SubName: Full=40S ribosomal protein S9, putative {ECO:0000313|EMBL:EAN87517.1};	tcr:504163.30;tcr:506401.120	IPR022801;IPR005710;IPR001912;IPR018079;IPR002942;IPR036986	XP_809368.1;XP_821266.1	KOG3301;COG0522		PF00163;PF01479	PS00632;PS50889	PTHR11831	TIGR01018
	TRINITY_DN74185_c0_g1_i3	tr|Q4D4S1|Q4D4S1_TRYCC	Trypanosoma cruzi (strain CL Brener)	Tc00.1047053504163.30, Tc00.1047053506401.120	ORFNames=Tc00.1047053504163.30 {ECO:0000313|EMBL:EAN87517.1}, Tc00.1047053506401.120 {ECO:0000313|EMBL:EAN99415.1};	Q4D4S1_TRYCC	Q4D4S1	40S ribosomal protein S9, putative	SubName: Full=40S ribosomal protein S9, putative {ECO:0000313|EMBL:EAN87517.1};	tcr:504163.30;tcr:506401.120	IPR022801;IPR005710;IPR001912;IPR018079;IPR002942;IPR036986	XP_809368.1;XP_821266.1	KOG3301;COG0522		PF00163;PF01479	PS00632;PS50889	PTHR11831	TIGR01018
	TRINITY_DN74186_c0_g1_i1	tr|C6XBE8|C6XBE8_METGS	Methylovorus glucosetrophus (strain SIP3-4)	Msip34_2681	OrderedLocusNames=Msip34_2681 {ECO:0000313|EMBL:ACT51918.1};	C6XBE8_METGS	C6XBE8	NmrA family protein	SubName: Full=NmrA family protein {ECO:0000313|EMBL:ACT51918.1};	mei:Msip34_2681	IPR036291;IPR008030	WP_015831140.1	ENOG4107R1B;ENOG410XP6C	POG091H075D	PF05368
	TRINITY_DN74125_c0_g1_i1	sp|P20059|HEMO_RAT	Rattus norvegicus (Rat)	Hpx	Name=Hpx;	HEMO_RAT	P20059	Hemopexin	RecName: Full=Hemopexin; Flags: Precursor;	rno:58917	IPR016358;IPR000585;IPR036375;IPR018487;IPR018486	NP_445770.1	KOG1565;ENOG410XQ5D	EOG091G052J	PF00045	PS00024;PS51642
	TRINITY_DN74125_c0_g1_i2	sp|P20059|HEMO_RAT	Rattus norvegicus (Rat)	Hpx	Name=Hpx;	HEMO_RAT	P20059	Hemopexin	RecName: Full=Hemopexin; Flags: Precursor;	rno:58917	IPR016358;IPR000585;IPR036375;IPR018487;IPR018486	NP_445770.1	KOG1565;ENOG410XQ5D	EOG091G052J	PF00045	PS00024;PS51642
	TRINITY_DN74127_c0_g1_i3	tr|A0A0Q3EGQ0|A0A0Q3EGQ0_BRADI	Brachypodium distachyon (Purple false brome) (Trachynia distachya)	BRADI_5g27575	ORFNames=BRADI_5g27575 {ECO:0000313|EMBL:KQJ85516.1};	A0A0Q3EGQ0_BRADI	A0A0Q3EGQ0	Uncharacterized protein	SubName: Full=Uncharacterized protein {ECO:0000313|EMBL:KQJ85516.1};	bdi:106865550		XP_014751212.1
	TRINITY_DN74127_c0_g1_i4	tr|A0A0Q3EGQ0|A0A0Q3EGQ0_BRADI	Brachypodium distachyon (Purple false brome) (Trachynia distachya)	BRADI_5g27575	ORFNames=BRADI_5g27575 {ECO:0000313|EMBL:KQJ85516.1};	A0A0Q3EGQ0_BRADI	A0A0Q3EGQ0	Uncharacterized protein	SubName: Full=Uncharacterized protein {ECO:0000313|EMBL:KQJ85516.1};	bdi:106865550		XP_014751212.1
	TRINITY_DN74127_c0_g1_i6	tr|A0A0Q3EGQ0|A0A0Q3EGQ0_BRADI	Brachypodium distachyon (Purple false brome) (Trachynia distachya)	BRADI_5g27575	ORFNames=BRADI_5g27575 {ECO:0000313|EMBL:KQJ85516.1};	A0A0Q3EGQ0_BRADI	A0A0Q3EGQ0	Uncharacterized protein	SubName: Full=Uncharacterized protein {ECO:0000313|EMBL:KQJ85516.1};	bdi:106865550		XP_014751212.1
	TRINITY_DN34725_c1_g3_i1	tr|K3XW18|K3XW18_SETIT	Setaria italica (Foxtail millet) (Panicum italicum)	LOC101753666 SETIT_006126mg	Name=LOC101753666 {ECO:0000313|EnsemblPlants:Si006126m}; ORFNames=SETIT_006126mg {ECO:0000313|EMBL:KQL11918.1};	K3XW18_SETIT	K3XW18	Uncharacterized protein	SubName: Full=Uncharacterized protein {ECO:0000313|EMBL:KQL11918.1, ECO:0000313|EnsemblPlants:Si006126m};	sita:101753666	IPR011992;IPR018247;IPR002048;IPR036188;IPR023753	XP_004966265.1;XP_014660591.1	KOG2495;COG1252	EOG0936051A	PF07992	PS00018;PS50222
	TRINITY_DN34706_c0_g1_i17	tr|U5FGL0|U5FGL0_POPTR	Populus trichocarpa (Western balsam poplar) (Populus balsamifera subsp. trichocarpa)	POPTR_0017s01910g	ORFNames=POPTR_0017s01910g {ECO:0000313|EMBL:ERP50263.1};	U5FGL0_POPTR	U5FGL0	Uncharacterized protein	SubName: Full=Uncharacterized protein {ECO:0000313|EMBL:ERP50263.1}; Flags: Fragment;	pop:POPTR_0017s01910g	IPR027417	XP_006372466.1	KOG1801;COG1112	EOG0936015H
	TRINITY_DN34706_c0_g1_i10	tr|A0A1S3VKJ6|A0A1S3VKJ6_VIGRR	Vigna radiata var. radiata (Mung bean) (Phaseolus aureus)	LOC106775891	Name=LOC106775891 {ECO:0000313|RefSeq:XP_014518614.1};	A0A1S3VKJ6_VIGRR	A0A1S3VKJ6	probable helicase MAGATAMA 3 isoform X1	SubName: Full=probable helicase MAGATAMA 3 isoform X1 {ECO:0000313|RefSeq:XP_014518614.1};	vra:106775891	IPR027417	XP_014518614.1
	TRINITY_DN34706_c0_g1_i21	tr|A0A1S3VKJ6|A0A1S3VKJ6_VIGRR	Vigna radiata var. radiata (Mung bean) (Phaseolus aureus)	LOC106775891	Name=LOC106775891 {ECO:0000313|RefSeq:XP_014518614.1};	A0A1S3VKJ6_VIGRR	A0A1S3VKJ6	probable helicase MAGATAMA 3 isoform X1	SubName: Full=probable helicase MAGATAMA 3 isoform X1 {ECO:0000313|RefSeq:XP_014518614.1};	vra:106775891	IPR027417	XP_014518614.1
	TRINITY_DN34706_c0_g1_i2	tr|U5FGL0|U5FGL0_POPTR	Populus trichocarpa (Western balsam poplar) (Populus balsamifera subsp. trichocarpa)	POPTR_0017s01910g	ORFNames=POPTR_0017s01910g {ECO:0000313|EMBL:ERP50263.1};	U5FGL0_POPTR	U5FGL0	Uncharacterized protein	SubName: Full=Uncharacterized protein {ECO:0000313|EMBL:ERP50263.1}; Flags: Fragment;	pop:POPTR_0017s01910g	IPR027417	XP_006372466.1	KOG1801;COG1112	EOG0936015H
	TRINITY_DN34706_c0_g1_i11	tr|U5FGL0|U5FGL0_POPTR	Populus trichocarpa (Western balsam poplar) (Populus balsamifera subsp. trichocarpa)	POPTR_0017s01910g	ORFNames=POPTR_0017s01910g {ECO:0000313|EMBL:ERP50263.1};	U5FGL0_POPTR	U5FGL0	Uncharacterized protein	SubName: Full=Uncharacterized protein {ECO:0000313|EMBL:ERP50263.1}; Flags: Fragment;	pop:POPTR_0017s01910g	IPR027417	XP_006372466.1	KOG1801;COG1112	EOG0936015H
	TRINITY_DN34706_c0_g1_i7	tr|A0A1S3VKJ6|A0A1S3VKJ6_VIGRR	Vigna radiata var. radiata (Mung bean) (Phaseolus aureus)	LOC106775891	Name=LOC106775891 {ECO:0000313|RefSeq:XP_014518614.1};	A0A1S3VKJ6_VIGRR	A0A1S3VKJ6	probable helicase MAGATAMA 3 isoform X1	SubName: Full=probable helicase MAGATAMA 3 isoform X1 {ECO:0000313|RefSeq:XP_014518614.1};	vra:106775891	IPR027417	XP_014518614.1
	TRINITY_DN34776_c0_g1_i1	tr|C4WUI5|C4WUI5_ACYPI	Acyrthosiphon pisum (Pea aphid)	ACYPI000784 LOC100159411	Name=ACYPI000784 {ECO:0000313|EMBL:BAH71555.1}; Synonyms=LOC100159411 {ECO:0000313|EnsemblMetazoa:ACYPI008050-PA};	C4WUI5_ACYPI	C4WUI5	ACYPI000784 protein	SubName: Full=ACYPI000784 protein {ECO:0000313|EMBL:BAH71555.1};	api:100159411	IPR002113;IPR002067;IPR018108;IPR023395	NP_001165432.1	KOG0749;ENOG410XNW0		PF00153	PS50920
	TRINITY_DN12398_c0_g1_i6	tr|I1ISS8|I1ISS8_BRADI	Brachypodium distachyon (Purple false brome) (Trachynia distachya)	LOC100842391 FAR3 BRADI_4g37856	Name=LOC100842391 {ECO:0000313|EnsemblPlants:BRADI4G37860.1}; Synonyms=FAR3 {ECO:0000313|EMBL:ASK86471.1}; ORFNames=BRADI_4g37856 {ECO:0000313|EMBL:KQJ91459.1};	I1ISS8_BRADI	I1ISS8	Fatty acyl-CoA reductase	RecName: Full=Fatty acyl-CoA reductase {ECO:0000256|RuleBase:RU363097}; EC=1.2.1.84 {ECO:0000256|RuleBase:RU363097};	bdi:100842081	IPR026055;IPR033640;IPR013120;IPR036291	XP_003578640.1	KOG1221;ENOG410XS7R		PF07993;PF03015		PTHR11011
	TRINITY_DN12398_c0_g1_i1	tr|I1ISS8|I1ISS8_BRADI	Brachypodium distachyon (Purple false brome) (Trachynia distachya)	LOC100842391 FAR3 BRADI_4g37856	Name=LOC100842391 {ECO:0000313|EnsemblPlants:BRADI4G37860.1}; Synonyms=FAR3 {ECO:0000313|EMBL:ASK86471.1}; ORFNames=BRADI_4g37856 {ECO:0000313|EMBL:KQJ91459.1};	I1ISS8_BRADI	I1ISS8	Fatty acyl-CoA reductase	RecName: Full=Fatty acyl-CoA reductase {ECO:0000256|RuleBase:RU363097}; EC=1.2.1.84 {ECO:0000256|RuleBase:RU363097};	bdi:100842081	IPR026055;IPR033640;IPR013120;IPR036291	XP_003578640.1	KOG1221;ENOG410XS7R		PF07993;PF03015		PTHR11011
	TRINITY_DN12322_c0_g1_i2	tr|I1I7K0|I1I7K0_BRADI	Brachypodium distachyon (Purple false brome) (Trachynia distachya)	LOC100844392 BRADI_3g37370	Name=LOC100844392 {ECO:0000313|EnsemblPlants:BRADI3G37370.2}; ORFNames=BRADI_3g37370 {ECO:0000313|EMBL:KQJ98519.1};	I1I7K0_BRADI	I1I7K0	Uncharacterized protein	SubName: Full=Uncharacterized protein {ECO:0000313|EMBL:KQJ98519.1, ECO:0000313|EnsemblPlants:BRADI3G37370.2};	bdi:100844392	IPR007265	XP_003574574.1	KOG2604;ENOG410XNXH	EOG093602M1	PF04136		PTHR13302
	TRINITY_DN33436_c0_g1_i4	tr|K3YSL0|K3YSL0_SETIT	Setaria italica (Foxtail millet) (Panicum italicum)	LOC101772470 SETIT_017255mg	Name=LOC101772470 {ECO:0000313|EnsemblPlants:Si017255m}; ORFNames=SETIT_017255mg {ECO:0000313|EMBL:KQL31760.1};	K3YSL0_SETIT	K3YSL0	Uncharacterized protein	SubName: Full=Uncharacterized protein {ECO:0000313|EMBL:KQL31760.1, ECO:0000313|EnsemblPlants:Si017255m};	sita:101772470	IPR011009;IPR000719;IPR001245;IPR008271	XP_004954103.1	KOG1187;COG0515	EOG09360D70	PF07714	PS50011;PS00108
	TRINITY_DN33492_c1_g1_i1	tr|K4A674|K4A674_SETIT	Setaria italica (Foxtail millet) (Panicum italicum)	LOC101755526 SETIT_034378mg	Name=LOC101755526 {ECO:0000313|EnsemblPlants:Si034378m}; ORFNames=SETIT_034378mg {ECO:0000313|EMBL:KQK87177.1};	K4A674_SETIT	K4A674	Uncharacterized protein	SubName: Full=Uncharacterized protein {ECO:0000313|EMBL:KQK87177.1, ECO:0000313|EnsemblPlants:Si034378m};	sita:101755526	IPR006768;IPR006767;IPR036265	XP_004981831.1	KOG2477;ENOG410YGTC	EOG093604TP	PF04677;PF04676
	TRINITY_DN33472_c0_g2_i2	tr|I1HPM7|I1HPM7_BRADI	Brachypodium distachyon (Purple false brome) (Trachynia distachya)	LOC100841226 BRADI_2g44240	Name=LOC100841226 {ECO:0000313|EnsemblPlants:BRADI2G44240.1}; ORFNames=BRADI_2g44240 {ECO:0000313|EMBL:KQK08840.1};	I1HPM7_BRADI	I1HPM7	Uncharacterized protein	SubName: Full=Uncharacterized protein {ECO:0000313|EMBL:KQK08840.1, ECO:0000313|EnsemblPlants:BRADI2G44240.1};	bdi:100841226	IPR036047;IPR032675	XP_003569403.1	ENOG410JPT7;ENOG410ZTAA	EOG093606MT
	TRINITY_DN33444_c0_g1_i3	tr|I1IC17|I1IC17_BRADI	Brachypodium distachyon (Purple false brome) (Trachynia distachya)	LOC100833392 BRADI_3g50110	Name=LOC100833392 {ECO:0000313|EnsemblPlants:BRADI3G50110.1}; ORFNames=BRADI_3g50110 {ECO:0000313|EMBL:KQK00531.1};	I1IC17_BRADI	I1IC17	Uncharacterized protein	SubName: Full=Uncharacterized protein {ECO:0000313|EMBL:KQK00531.1, ECO:0000313|EnsemblPlants:BRADI3G50110.1};	bdi:100833392	IPR006636;IPR023392;IPR013026;IPR011990;IPR013105;IPR019734	XP_010235772.1	KOG0548;ENOG410XTCJ	EOG093608J7	PF07719;PF13181	PS50005;PS50293
	TRINITY_DN33466_c0_g2_i1	tr|K3XV83|K3XV83_SETIT	Setaria italica (Foxtail millet) (Panicum italicum)	LOC101786193 SETIT_005840mg	Name=LOC101786193 {ECO:0000313|EnsemblPlants:Si005840m}; ORFNames=SETIT_005840mg {ECO:0000313|EMBL:KQL11923.1};	K3XV83_SETIT	K3XV83	Uncharacterized protein	SubName: Full=Uncharacterized protein {ECO:0000313|EMBL:KQL11923.1, ECO:0000313|EnsemblPlants:Si005840m};	sita:101786193	IPR012590;IPR009723	XP_004966260.1	KOG3322;ENOG410XT8N	EOG09360376	PF06978;PF08170
	TRINITY_DN33494_c0_g1_i1	tr|Q9LGR1|Q9LGR1_ORYSJ	Oryza sativa subsp. japonica (Rice)	Os01g0184800 Os01g0184800 OsJ_00663, OSNPB_010184800, P0510F03.9	Name=Os01g0184800 {ECO:0000313|EMBL:BAS70768.1}; OrderedLocusNames=Os01g0184800 {ECO:0000313|EMBL:BAF04150.1}; ORFNames=OsJ_00663 {ECO:0000313|EMBL:EEE54008.1}, OSNPB_010184800 {ECO:0000313|EMBL:BAS70768.1}, P0510F03.9 {ECO:0000313|EMBL:BAB03357.1};	Q9LGR1_ORYSJ	Q9LGR1	Os01g0184800 protein; Putative phosducin-like 3; cDNA clone:J033028G17, full insert sequence; cDNA clone:J033096N05, full insert sequence	SubName: Full=Os01g0184800 protein {ECO:0000313|EMBL:BAF04150.1}; SubName: Full=Putative phosducin-like 3 {ECO:0000313|EMBL:BAB03357.1}; SubName: Full=cDNA clone:J033028G17, full insert sequence {ECO:0000313|EMBL:BAG93425.1}; SubName: Full=cDNA clone:J033096N05, full insert sequence {ECO:0000313|EMBL:BAG95608.1};	osa:4325346	IPR024253;IPR036249	XP_015617067.1	KOG3170;ENOG4111H24	EOG09360L18	PF02114
	TRINITY_DN41374_c1_g1_i1	tr|A0A0Q3H9F3|A0A0Q3H9F3_BRADI	Brachypodium distachyon (Purple false brome) (Trachynia distachya)	BRADI_5g23130	ORFNames=BRADI_5g23130 {ECO:0000313|EMBL:KQJ84827.1};	A0A0Q3H9F3_BRADI	A0A0Q3H9F3	Diacylglycerol kinase; DAG kinase	RecName: Full=Diacylglycerol kinase {ECO:0000256|RuleBase:RU361128}; Short=DAG kinase {ECO:0000256|RuleBase:RU361128}; EC=2.7.1.107 {ECO:0000256|RuleBase:RU361128};	bdi:100839970	IPR017438;IPR000756;IPR001206;IPR016064	XP_003580629.2			PF00609;PF00781	PS50146
	TRINITY_DN41343_c0_g1_i3	tr|A0A067K1X3|A0A067K1X3_JATCU	Jatropha curcas (Barbados nut)	JCGZ_16457	ORFNames=JCGZ_16457 {ECO:0000313|EMBL:KDP29068.1};	A0A067K1X3_JATCU	A0A067K1X3	Uncharacterized protein	SubName: Full=Uncharacterized protein {ECO:0000313|EMBL:KDP29068.1};	jcu:105642166	IPR011009;IPR032675;IPR024788;IPR000719;IPR017441;IPR001245;IPR008271	XP_012082271.1;XP_012082272.1			PF12819;PF07714	PS00107;PS50011;PS00108
	TRINITY_DN41343_c0_g1_i2	tr|A0A067K1X3|A0A067K1X3_JATCU	Jatropha curcas (Barbados nut)	JCGZ_16457	ORFNames=JCGZ_16457 {ECO:0000313|EMBL:KDP29068.1};	A0A067K1X3_JATCU	A0A067K1X3	Uncharacterized protein	SubName: Full=Uncharacterized protein {ECO:0000313|EMBL:KDP29068.1};	jcu:105642166	IPR011009;IPR032675;IPR024788;IPR000719;IPR017441;IPR001245;IPR008271	XP_012082271.1;XP_012082272.1			PF12819;PF07714	PS00107;PS50011;PS00108
	TRINITY_DN51001_c0_g1_i2	tr|D0N747|D0N747_PHYIT	Phytophthora infestans (strain T30-4) (Potato late blight fungus)	PITG_07048	ORFNames=PITG_07048 {ECO:0000313|EMBL:EEY53396.1};	D0N747_PHYIT	D0N747	Superoxide dismutase	RecName: Full=Superoxide dismutase {ECO:0000256|RuleBase:RU000414}; EC=1.15.1.1 {ECO:0000256|RuleBase:RU000414};	pif:PITG_07048	IPR001189;IPR019833;IPR019832;IPR019831;IPR036324;IPR036314	XP_002905014.1			PF02777;PF00081	PS00088
	TRINITY_DN51067_c0_g1_i2	tr|A0A1S3UQR6|A0A1S3UQR6_VIGRR	Vigna radiata var. radiata (Mung bean) (Phaseolus aureus)	LOC106767839	Name=LOC106767839 {ECO:0000313|RefSeq:XP_014508279.1};	A0A1S3UQR6_VIGRR	A0A1S3UQR6	vacuolar protein sorting-associated protein 2 homolog 1-like	SubName: Full=vacuolar protein sorting-associated protein 2 homolog 1-like {ECO:0000313|RefSeq:XP_014508279.1};	vra:106767839	IPR005024	XP_014508279.1			PF03357
	TRINITY_DN51067_c0_g1_i1	tr|A0A1S3UQR6|A0A1S3UQR6_VIGRR	Vigna radiata var. radiata (Mung bean) (Phaseolus aureus)	LOC106767839	Name=LOC106767839 {ECO:0000313|RefSeq:XP_014508279.1};	A0A1S3UQR6_VIGRR	A0A1S3UQR6	vacuolar protein sorting-associated protein 2 homolog 1-like	SubName: Full=vacuolar protein sorting-associated protein 2 homolog 1-like {ECO:0000313|RefSeq:XP_014508279.1};	vra:106767839	IPR005024	XP_014508279.1			PF03357
	TRINITY_DN51067_c0_g1_i3	tr|R1EZ35|R1EZ35_EMIHU	Emiliania huxleyi (Pontosphaera huxleyi)	VPS2A EMIHUDRAFT_443471	Name=VPS2A {ECO:0000313|EMBL:EOD26134.1}; ORFNames=EMIHUDRAFT_443471 {ECO:0000313|EMBL:EOD26134.1};	R1EZ35_EMIHU	R1EZ35	Vacuolar protein sorting protein 2A	SubName: Full=Vacuolar protein sorting protein 2A {ECO:0000313|EMBL:EOD26134.1};	ehx:EMIHUDRAFT_443471	IPR005024	XP_005778563.1			PF03357
	TRINITY_DN11900_c0_g1_i2	tr|I1I8P9|I1I8P9_BRADI	Brachypodium distachyon (Purple false brome) (Trachynia distachya)	BRADI_3g40620	ORFNames=BRADI_3g40620 {ECO:0000313|EMBL:KQJ99029.1};	I1I8P9_BRADI	I1I8P9	Uncharacterized protein	SubName: Full=Uncharacterized protein {ECO:0000313|EMBL:KQJ99029.1, ECO:0000313|EnsemblPlants:BRADI3G40620.1};	bdi:100823180	IPR037119;IPR012349	XP_010235319.1	ENOG410IF7X;COG0748	EOG09360GME
	TRINITY_DN11974_c0_g2_i8	tr|I1H6Y3|I1H6Y3_BRADI	Brachypodium distachyon (Purple false brome) (Trachynia distachya)	LOC100827922 BRADI_1g66590	Name=LOC100827922 {ECO:0000313|EnsemblPlants:BRADI1G66590.1}; ORFNames=BRADI_1g66590 {ECO:0000313|EMBL:KQK22333.1};	I1H6Y3_BRADI	I1H6Y3	Uncharacterized protein	SubName: Full=Uncharacterized protein {ECO:0000313|EMBL:KQK22333.1, ECO:0000313|EnsemblPlants:BRADI1G66590.1};	bdi:100827922	IPR018181;IPR029048;IPR029047;IPR013126	XP_003558228.1	KOG0101;COG0443	EOG093604KP	PF00012	PS00297;PS00329;PS01036
	TRINITY_DN11974_c0_g2_i3	tr|A0A0R4J626|A0A0R4J626_SOYBN	Glycine max (Soybean) (Glycine hispida)	LOC100777767 GLYMA_19G172200	Name=LOC100777767 {ECO:0000313|EnsemblPlants:GLYMA19G35560.1}; ORFNames=GLYMA_19G172200 {ECO:0000313|EMBL:KRG95806.1};	A0A0R4J626_SOYBN	A0A0R4J626	Uncharacterized protein	SubName: Full=Uncharacterized protein {ECO:0000313|EMBL:KRG95806.1, ECO:0000313|EnsemblPlants:GLYMA19G35560.1};	gmx:100777767	IPR018181;IPR029048;IPR029047;IPR013126	XP_003554320.3			PF00012	PS00297;PS00329;PS01036
	TRINITY_DN11974_c0_g2_i4	tr|Q10NA9|Q10NA9_ORYSJ	Oryza sativa subsp. japonica (Rice)	LOC_Os03g16860, Os03g0276500 OsJ_10329, OSNPB_030276500	OrderedLocusNames=LOC_Os03g16860 {ECO:0000313|EMBL:ABF95258.1}, Os03g0276500 {ECO:0000313|EMBL:BAF11626.1}; ORFNames=OsJ_10329 {ECO:0000313|EMBL:EAZ26443.1}, OSNPB_030276500 {ECO:0000313|EMBL:BAS83517.1};	Q10NA9_ORYSJ	Q10NA9	70 kDa heat shock protein; Heat shock cognate 70 kDa protein, putative, expressed; Os03g0276500 protein; cDNA clone:J023139H01, full insert sequence	SubName: Full=70 kDa heat shock protein {ECO:0000313|EMBL:ADR66978.1}; SubName: Full=Heat shock cognate 70 kDa protein, putative, expressed {ECO:0000313|EMBL:ABF95258.1}; SubName: Full=Os03g0276500 protein {ECO:0000313|EMBL:BAF11626.1}; SubName: Full=cDNA clone:J023139H01, full insert sequence {ECO:0000313|EMBL:BAG93163.1};	osa:4332413	IPR018181;IPR029048;IPR029047;IPR013126	XP_015630538.1	KOG0101;COG0443	EOG093604KP	PF00012	PS00297;PS00329;PS01036
	TRINITY_DN11974_c0_g2_i7	tr|A0A0R4J626|A0A0R4J626_SOYBN	Glycine max (Soybean) (Glycine hispida)	LOC100777767 GLYMA_19G172200	Name=LOC100777767 {ECO:0000313|EnsemblPlants:GLYMA19G35560.1}; ORFNames=GLYMA_19G172200 {ECO:0000313|EMBL:KRG95806.1};	A0A0R4J626_SOYBN	A0A0R4J626	Uncharacterized protein	SubName: Full=Uncharacterized protein {ECO:0000313|EMBL:KRG95806.1, ECO:0000313|EnsemblPlants:GLYMA19G35560.1};	gmx:100777767	IPR018181;IPR029048;IPR029047;IPR013126	XP_003554320.3			PF00012	PS00297;PS00329;PS01036
	TRINITY_DN11974_c0_g2_i2	tr|I1H6Y3|I1H6Y3_BRADI	Brachypodium distachyon (Purple false brome) (Trachynia distachya)	LOC100827922 BRADI_1g66590	Name=LOC100827922 {ECO:0000313|EnsemblPlants:BRADI1G66590.1}; ORFNames=BRADI_1g66590 {ECO:0000313|EMBL:KQK22333.1};	I1H6Y3_BRADI	I1H6Y3	Uncharacterized protein	SubName: Full=Uncharacterized protein {ECO:0000313|EMBL:KQK22333.1, ECO:0000313|EnsemblPlants:BRADI1G66590.1};	bdi:100827922	IPR018181;IPR029048;IPR029047;IPR013126	XP_003558228.1	KOG0101;COG0443	EOG093604KP	PF00012	PS00297;PS00329;PS01036
	TRINITY_DN11974_c0_g2_i5	tr|I1H6Y3|I1H6Y3_BRADI	Brachypodium distachyon (Purple false brome) (Trachynia distachya)	LOC100827922 BRADI_1g66590	Name=LOC100827922 {ECO:0000313|EnsemblPlants:BRADI1G66590.1}; ORFNames=BRADI_1g66590 {ECO:0000313|EMBL:KQK22333.1};	I1H6Y3_BRADI	I1H6Y3	Uncharacterized protein	SubName: Full=Uncharacterized protein {ECO:0000313|EMBL:KQK22333.1, ECO:0000313|EnsemblPlants:BRADI1G66590.1};	bdi:100827922	IPR018181;IPR029048;IPR029047;IPR013126	XP_003558228.1	KOG0101;COG0443	EOG093604KP	PF00012	PS00297;PS00329;PS01036
	TRINITY_DN75072_c0_g1_i1	tr|A0A1S4B7K6|A0A1S4B7K6_TOBAC	Nicotiana tabacum (Common tobacco)	LOC107805333	Name=LOC107805333 {ECO:0000313|RefSeq:XP_016484849.1};	A0A1S4B7K6_TOBAC	A0A1S4B7K6	SRSF protein kinase 2-like isoform X1	SubName: Full=SRSF protein kinase 2-like isoform X1 {ECO:0000313|RefSeq:XP_016484849.1};	nta:107805333	IPR011009;IPR000719;IPR017441;IPR008271	XP_016484849.1			PF00069	PS00107;PS50011;PS00108
	TRINITY_DN10261_c0_g1_i3	tr|I1HY07|I1HY07_BRADI	Brachypodium distachyon (Purple false brome) (Trachynia distachya)	LOC100829302 BRADI_3g06170	Name=LOC100829302 {ECO:0000313|EnsemblPlants:BRADI3G06170.2}; ORFNames=BRADI_3g06170 {ECO:0000313|EMBL:KQJ93690.1};	I1HY07_BRADI	I1HY07	Uncharacterized protein	SubName: Full=Uncharacterized protein {ECO:0000313|EMBL:KQJ93690.1, ECO:0000313|EnsemblPlants:BRADI3G06170.2};	bdi:100829302	IPR005539;IPR009057;IPR001356;IPR008422;IPR005540;IPR005541	XP_003570788.1	KOG0773;ENOG410XPMQ		PF03789;PF05920;PF03790;PF03791	PS51213;PS50071
	TRINITY_DN10261_c0_g1_i9	tr|I1HY07|I1HY07_BRADI	Brachypodium distachyon (Purple false brome) (Trachynia distachya)	LOC100829302 BRADI_3g06170	Name=LOC100829302 {ECO:0000313|EnsemblPlants:BRADI3G06170.2}; ORFNames=BRADI_3g06170 {ECO:0000313|EMBL:KQJ93690.1};	I1HY07_BRADI	I1HY07	Uncharacterized protein	SubName: Full=Uncharacterized protein {ECO:0000313|EMBL:KQJ93690.1, ECO:0000313|EnsemblPlants:BRADI3G06170.2};	bdi:100829302	IPR005539;IPR009057;IPR001356;IPR008422;IPR005540;IPR005541	XP_003570788.1	KOG0773;ENOG410XPMQ		PF03789;PF05920;PF03790;PF03791	PS51213;PS50071
	TRINITY_DN10230_c0_g1_i1	tr|C0PAG3|C0PAG3_MAIZE	Zea mays (Maize)			C0PAG3_MAIZE	C0PAG3	Uncharacterized protein	SubName: Full=Uncharacterized protein {ECO:0000313|EMBL:ACN31158.1};	zma:100382768		NP_001168949.1
	TRINITY_DN10230_c0_g1_i4	tr|C4J181|C4J181_MAIZE	Zea mays (Maize)	100501120 ZEAMMB73_Zm00001d051325	Name=100501120 {ECO:0000313|EnsemblPlants:Zm00001d051325_P001}; ORFNames=ZEAMMB73_Zm00001d051325 {ECO:0000313|EMBL:AQK54039.1};	C4J181_MAIZE	C4J181	Uncharacterized protein	SubName: Full=Uncharacterized protein {ECO:0000313|EMBL:ACR34931.1, ECO:0000313|EnsemblPlants:Zm00001d051325_P001};	zma:100501120		NP_001182860.1	ENOG410JUB7;ENOG411071H	EOG09361FKV
	TRINITY_DN10230_c0_g1_i10	tr|C4J181|C4J181_MAIZE	Zea mays (Maize)	100501120 ZEAMMB73_Zm00001d051325	Name=100501120 {ECO:0000313|EnsemblPlants:Zm00001d051325_P001}; ORFNames=ZEAMMB73_Zm00001d051325 {ECO:0000313|EMBL:AQK54039.1};	C4J181_MAIZE	C4J181	Uncharacterized protein	SubName: Full=Uncharacterized protein {ECO:0000313|EMBL:ACR34931.1, ECO:0000313|EnsemblPlants:Zm00001d051325_P001};	zma:100501120		NP_001182860.1	ENOG410JUB7;ENOG411071H	EOG09361FKV
	TRINITY_DN10294_c0_g1_i14	tr|C5Z8A8|C5Z8A8_SORBI	Sorghum bicolor (Sorghum) (Sorghum vulgare)	SORBI_3010G236400	ORFNames=SORBI_3010G236400 {ECO:0000313|EMBL:EER88841.1};	C5Z8A8_SORBI	C5Z8A8	Uncharacterized protein	SubName: Full=Uncharacterized protein {ECO:0000313|EMBL:EER88841.1};	sbi:8065093	IPR001394;IPR033809;IPR028889;IPR013083;IPR001607	XP_002437474.1	KOG2026;ENOG410XS41	EOG093605UW	PF00443;PF02148	PS50235;PS50271	PTHR43985
	TRINITY_DN10202_c0_g1_i3	sp|P0DKK1|RL371_ORYSJ	Oryza sativa subsp. japonica (Rice)	Os01g0679700, LOC_Os01g48770 B1144G04.40-1, OsJ_03011	OrderedLocusNames=Os01g0679700 {ECO:0000312|EMBL:BAS73688.1}, LOC_Os01g48770 {ECO:0000305}; ORFNames=B1144G04.40-1, OsJ_03011 {ECO:0000312|EMBL:EAZ13091.1};	RL371_ORYSJ	P0DKK1	60S ribosomal protein L37a-1	RecName: Full=60S ribosomal protein L37a-1;	osa:4325282;osa:4339573	IPR002674;IPR011331;IPR011332	XP_015622290.1;XP_015640520.1			PF01780		PTHR43931	TIGR00280
	TRINITY_DN10266_c1_g1_i1	tr|I1H725|I1H725_BRADI	Brachypodium distachyon (Purple false brome) (Trachynia distachya)	LOC100834162 BRADI_1g66920	Name=LOC100834162 {ECO:0000313|EnsemblPlants:BRADI1G66920.1}; ORFNames=BRADI_1g66920 {ECO:0000313|EMBL:KQK22386.1};	I1H725_BRADI	I1H725	PP2C30	SubName: Full=PP2C30 {ECO:0000313|EMBL:AJR27168.1};	bdi:100834162	IPR015655;IPR000222;IPR036457;IPR001932	NP_001304795.1	KOG0698;COG0631	EOG09360IAR	PF00481	PS01032;PS51746	PTHR13832
	TRINITY_DN10280_c0_g1_i20	tr|A9TDX7|A9TDX7_PHYPA	Physcomitrella patens subsp. patens (Moss)	pplax1 PHYPADRAFT_144031	Name=pplax1 {ECO:0000313|EMBL:EDQ58351.1}; ORFNames=PHYPADRAFT_144031 {ECO:0000313|EMBL:EDQ58351.1};	A9TDX7_PHYPA	A9TDX7	Uncharacterized protein	SubName: Full=Uncharacterized protein {ECO:0000313|EMBL:EDQ58351.1};	ppp:PHYPADRAFT_144031	IPR013057	XP_001776801.1	KOG1303;COG0814		PF01490
	TRINITY_DN10280_c0_g1_i8	tr|A9TDX7|A9TDX7_PHYPA	Physcomitrella patens subsp. patens (Moss)	pplax1 PHYPADRAFT_144031	Name=pplax1 {ECO:0000313|EMBL:EDQ58351.1}; ORFNames=PHYPADRAFT_144031 {ECO:0000313|EMBL:EDQ58351.1};	A9TDX7_PHYPA	A9TDX7	Uncharacterized protein	SubName: Full=Uncharacterized protein {ECO:0000313|EMBL:EDQ58351.1};	ppp:PHYPADRAFT_144031	IPR013057	XP_001776801.1	KOG1303;COG0814		PF01490
	TRINITY_DN10280_c0_g1_i11	tr|A9TDX7|A9TDX7_PHYPA	Physcomitrella patens subsp. patens (Moss)	pplax1 PHYPADRAFT_144031	Name=pplax1 {ECO:0000313|EMBL:EDQ58351.1}; ORFNames=PHYPADRAFT_144031 {ECO:0000313|EMBL:EDQ58351.1};	A9TDX7_PHYPA	A9TDX7	Uncharacterized protein	SubName: Full=Uncharacterized protein {ECO:0000313|EMBL:EDQ58351.1};	ppp:PHYPADRAFT_144031	IPR013057	XP_001776801.1	KOG1303;COG0814		PF01490
	TRINITY_DN10280_c0_g1_i28	tr|A9TDX7|A9TDX7_PHYPA	Physcomitrella patens subsp. patens (Moss)	pplax1 PHYPADRAFT_144031	Name=pplax1 {ECO:0000313|EMBL:EDQ58351.1}; ORFNames=PHYPADRAFT_144031 {ECO:0000313|EMBL:EDQ58351.1};	A9TDX7_PHYPA	A9TDX7	Uncharacterized protein	SubName: Full=Uncharacterized protein {ECO:0000313|EMBL:EDQ58351.1};	ppp:PHYPADRAFT_144031	IPR013057	XP_001776801.1	KOG1303;COG0814		PF01490
	TRINITY_DN10260_c1_g1_i5	tr|Q8RUI9|Q8RUI9_ORYSJ	Oryza sativa subsp. japonica (Rice)	P0648C09.6 Os01g0874300 OsJ_04260, OSNPB_010874300, P0491F11.40, P0698A10.4	Name=P0648C09.6 {ECO:0000313|EMBL:BAB86217.1}; OrderedLocusNames=Os01g0874300 {ECO:0000313|EMBL:BAF06871.1}; ORFNames=OsJ_04260 {ECO:0000313|EMBL:EAZ14337.1}, OSNPB_010874300 {ECO:0000313|EMBL:BAS75486.1}, P0491F11.40 {ECO:0000313|EMBL:BAB89293.1}, P0698A10.4 {ECO:0000313|EMBL:BAB92433.1};	Q8RUI9_ORYSJ	Q8RUI9	Os01g0874300 protein; Putative myb-related protein; Putative myb2; cDNA clone:001-029-F12, full insert sequence	SubName: Full=Os01g0874300 protein {ECO:0000313|EMBL:BAF06871.1}; SubName: Full=Putative myb-related protein {ECO:0000313|EMBL:BAB86217.1}; SubName: Full=Putative myb2 {ECO:0000313|EMBL:BAB89293.1}; SubName: Full=cDNA clone:001-029-F12, full insert sequence {ECO:0000313|EMBL:BAG87538.1};	osa:4324770	IPR009057;IPR017930;IPR001005	XP_015627699.1	KOG0048;COG5147	EOG09360ONX	PF00249	PS51294
	TRINITY_DN38603_c0_g1_i3	tr|I1GV45|I1GV45_BRADI	Brachypodium distachyon (Purple false brome) (Trachynia distachya)	LOC100836007 BRADI_1g29570	Name=LOC100836007 {ECO:0000313|EnsemblPlants:BRADI1G29570.1}; ORFNames=BRADI_1g29570 {ECO:0000313|EMBL:KQK16624.1};	I1GV45_BRADI	I1GV45	Sucrose synthase	RecName: Full=Sucrose synthase {ECO:0000256|RuleBase:RU280817}; EC=2.4.1.13 {ECO:0000256|RuleBase:RU280817};	bdi:100836007	IPR001296;IPR000368;IPR012820	XP_010239411.1	KOG0853;COG0438	EOG093601X9	PF00534;PF00862			TIGR02470
	TRINITY_DN38664_c1_g1_i2	tr|I1GVB6|I1GVB6_BRADI	Brachypodium distachyon (Purple false brome) (Trachynia distachya)	BRADI_1g30200	ORFNames=BRADI_1g30200 {ECO:0000313|EMBL:KQK16720.1};	I1GVB6_BRADI	I1GVB6	Uncharacterized protein	SubName: Full=Uncharacterized protein {ECO:0000313|EMBL:KQK16720.1, ECO:0000313|EnsemblPlants:BRADI1G30200.1};	bdi:100827941	IPR015655;IPR000222;IPR036457;IPR001932	XP_010239682.1;XP_010239689.1;XP_014752300.1	KOG0700;COG0631	EOG09360D2T	PF00481	PS01032;PS51746	PTHR13832
	TRINITY_DN46452_c0_g2_i1	tr|Q41834|Q41834_MAIZE	Zea mays (Maize)	NBP	Name=NBP {ECO:0000313|EMBL:AAA33486.1};	Q41834_MAIZE	Q41834	Nucleic acid-binding protein; Ribonucleoprotein	SubName: Full=Nucleic acid-binding protein {ECO:0000313|EMBL:AAA33486.1}; SubName: Full=Ribonucleoprotein {ECO:0000313|EMBL:ACG38158.1}; Flags: Precursor;	zma:542277	IPR035979;IPR000504	NP_001105347.1	ENOG410IQWU;ENOG4111FDY	EOG09360O4L	PF00076	PS50102
	TRINITY_DN46452_c0_g2_i2	tr|Q41834|Q41834_MAIZE	Zea mays (Maize)	NBP	Name=NBP {ECO:0000313|EMBL:AAA33486.1};	Q41834_MAIZE	Q41834	Nucleic acid-binding protein; Ribonucleoprotein	SubName: Full=Nucleic acid-binding protein {ECO:0000313|EMBL:AAA33486.1}; SubName: Full=Ribonucleoprotein {ECO:0000313|EMBL:ACG38158.1}; Flags: Precursor;	zma:542277	IPR035979;IPR000504	NP_001105347.1	ENOG410IQWU;ENOG4111FDY	EOG09360O4L	PF00076	PS50102
	TRINITY_DN46466_c0_g1_i3	tr|A0A109RN36|A0A109RN36_9FLAO	Lutibacter profundi	Lupro_00160	ORFNames=Lupro_00160 {ECO:0000313|EMBL:AMC09772.1};	A0A109RN36_9FLAO	A0A109RN36	UDP-sugar hydrolase	SubName: Full=UDP-sugar hydrolase {ECO:0000313|EMBL:AMC09772.1};	lut:Lupro_00160	IPR008334;IPR036907;IPR006179	WP_068205490.1			PF02872		PTHR11575
	TRINITY_DN24218_c0_g1_i1	tr|A0A0Q3P2Z0|A0A0Q3P2Z0_BRADI	Brachypodium distachyon (Purple false brome) (Trachynia distachya)	BRADI_5g12890	ORFNames=BRADI_5g12890 {ECO:0000313|EMBL:KQJ83073.1};	A0A0Q3P2Z0_BRADI	A0A0Q3P2Z0	Uncharacterized protein	SubName: Full=Uncharacterized protein {ECO:0000313|EMBL:KQJ83073.1};	bdi:100832207	IPR036872;IPR001715;IPR027640;IPR001752;IPR036961;IPR027417	XP_003579936.2			PF00307;PF00225	PS50021;PS50067	PTHR24115
	TRINITY_DN24211_c0_g1_i10	tr|Q8S7P4|Q8S7P4_ORYSJ	Oryza sativa subsp. japonica (Rice)	OSJNBa0095C07.21	Name=OSJNBa0095C07.21 {ECO:0000313|EMBL:AAL86479.1};	Q8S7P4_ORYSJ	Q8S7P4	Putative transposase	SubName: Full=Putative transposase {ECO:0000313|EMBL:AAL86479.1};	osa:107278523	IPR025398;IPR008906;IPR012337;IPR006580	XP_015613134.1;XP_015613135.1;XP_015613136.1			PF05699;PF14291
	TRINITY_DN24211_c0_g1_i16	tr|Q8S7P4|Q8S7P4_ORYSJ	Oryza sativa subsp. japonica (Rice)	OSJNBa0095C07.21	Name=OSJNBa0095C07.21 {ECO:0000313|EMBL:AAL86479.1};	Q8S7P4_ORYSJ	Q8S7P4	Putative transposase	SubName: Full=Putative transposase {ECO:0000313|EMBL:AAL86479.1};	osa:107278523	IPR025398;IPR008906;IPR012337;IPR006580	XP_015613134.1;XP_015613135.1;XP_015613136.1			PF05699;PF14291
	TRINITY_DN24211_c0_g1_i4	tr|Q8S7P4|Q8S7P4_ORYSJ	Oryza sativa subsp. japonica (Rice)	OSJNBa0095C07.21	Name=OSJNBa0095C07.21 {ECO:0000313|EMBL:AAL86479.1};	Q8S7P4_ORYSJ	Q8S7P4	Putative transposase	SubName: Full=Putative transposase {ECO:0000313|EMBL:AAL86479.1};	osa:107278523	IPR025398;IPR008906;IPR012337;IPR006580	XP_015613134.1;XP_015613135.1;XP_015613136.1			PF05699;PF14291
	TRINITY_DN24211_c0_g1_i13	tr|Q8S7P4|Q8S7P4_ORYSJ	Oryza sativa subsp. japonica (Rice)	OSJNBa0095C07.21	Name=OSJNBa0095C07.21 {ECO:0000313|EMBL:AAL86479.1};	Q8S7P4_ORYSJ	Q8S7P4	Putative transposase	SubName: Full=Putative transposase {ECO:0000313|EMBL:AAL86479.1};	osa:107278523	IPR025398;IPR008906;IPR012337;IPR006580	XP_015613134.1;XP_015613135.1;XP_015613136.1			PF05699;PF14291
	TRINITY_DN24209_c0_g2_i6	tr|I1IHQ8|I1IHQ8_BRADI	Brachypodium distachyon (Purple false brome) (Trachynia distachya)	LOC100832263 BRADI_4g05360	Name=LOC100832263 {ECO:0000313|EnsemblPlants:BRADI4G05360.1}; ORFNames=BRADI_4g05360 {ECO:0000313|EMBL:KQJ86419.1};	I1IHQ8_BRADI	I1IHQ8	Uncharacterized protein	SubName: Full=Uncharacterized protein {ECO:0000313|EMBL:KQJ86419.1, ECO:0000313|EnsemblPlants:BRADI4G05360.1};	bdi:100832263	IPR012416	XP_010237185.1	ENOG410JVGZ;ENOG41105X3	EOG093606EG	PF07887
	TRINITY_DN24209_c0_g2_i7	tr|I1IHQ8|I1IHQ8_BRADI	Brachypodium distachyon (Purple false brome) (Trachynia distachya)	LOC100832263 BRADI_4g05360	Name=LOC100832263 {ECO:0000313|EnsemblPlants:BRADI4G05360.1}; ORFNames=BRADI_4g05360 {ECO:0000313|EMBL:KQJ86419.1};	I1IHQ8_BRADI	I1IHQ8	Uncharacterized protein	SubName: Full=Uncharacterized protein {ECO:0000313|EMBL:KQJ86419.1, ECO:0000313|EnsemblPlants:BRADI4G05360.1};	bdi:100832263	IPR012416	XP_010237185.1	ENOG410JVGZ;ENOG41105X3	EOG093606EG	PF07887
	TRINITY_DN24209_c0_g2_i12	tr|I1IHQ8|I1IHQ8_BRADI	Brachypodium distachyon (Purple false brome) (Trachynia distachya)	LOC100832263 BRADI_4g05360	Name=LOC100832263 {ECO:0000313|EnsemblPlants:BRADI4G05360.1}; ORFNames=BRADI_4g05360 {ECO:0000313|EMBL:KQJ86419.1};	I1IHQ8_BRADI	I1IHQ8	Uncharacterized protein	SubName: Full=Uncharacterized protein {ECO:0000313|EMBL:KQJ86419.1, ECO:0000313|EnsemblPlants:BRADI4G05360.1};	bdi:100832263	IPR012416	XP_010237185.1	ENOG410JVGZ;ENOG41105X3	EOG093606EG	PF07887
	TRINITY_DN83275_c1_g1_i1	tr|I1IFG6|I1IFG6_BRADI	Brachypodium distachyon (Purple false brome) (Trachynia distachya)	LOC100842555 BRADI_3g59780	Name=LOC100842555 {ECO:0000313|EnsemblPlants:BRADI3G59780.1}; ORFNames=BRADI_3g59780 {ECO:0000313|EMBL:KQK02006.1};	I1IFG6_BRADI	I1IFG6	Formin-like protein	RecName: Full=Formin-like protein {ECO:0000256|RuleBase:RU361260};	bdi:100842555	IPR015425	XP_003570681.1	ENOG410ISMN;ENOG41102U1	EOG093607O0	PF02181	PS51444
	TRINITY_DN49973_c1_g1_i2	tr|I1H330|I1H330_BRADI	Brachypodium distachyon (Purple false brome) (Trachynia distachya)	LOC100832579 BRADI_1g55440	Name=LOC100832579 {ECO:0000313|EnsemblPlants:BRADI1G55440.1}; ORFNames=BRADI_1g55440 {ECO:0000313|EMBL:KQK20578.1};	I1H330_BRADI	I1H330	Uncharacterized protein	SubName: Full=Uncharacterized protein {ECO:0000313|EMBL:KQK20578.1, ECO:0000313|EnsemblPlants:BRADI1G55440.1};	bdi:100832579	IPR013785;IPR011060;IPR018204;IPR002028	XP_003557476.1	KOG4175;COG0159	EOG09360IXC	PF00290	PS00167		TIGR00262
	TRINITY_DN49988_c0_g1_i2	tr|A4HD62|A4HD62_LEIBR	Leishmania braziliensis	LBRM_24_0040, LBRM_32_0500	ORFNames=LBRM_24_0040 {ECO:0000313|EMBL:CAM42179.1}, LBRM_32_0500 {ECO:0000313|EMBL:CAM42845.1};	A4HD62_LEIBR	A4HD62	Putative 60S ribosomal protein L17	SubName: Full=Putative 60S ribosomal protein L17 {ECO:0000313|EMBL:CAM42179.1};	lbz:LBRM_24_0040;lbz:LBRM_32_0500	IPR001063;IPR018260;IPR005721;IPR036394	XP_001565272.1;XP_001567408.1	KOG3353;COG0091		PF00237	PS00464	PTHR11593	TIGR01038
	TRINITY_DN53234_c0_g2_i1	tr|M2M8N6|M2M8N6_BAUCO	Baudoinia compniacensis (strain UAMH 10762) (Angels' share fungus)	BAUCODRAFT_125737	ORFNames=BAUCODRAFT_125737 {ECO:0000313|EMBL:EMC92761.1};	M2M8N6_BAUCO	M2M8N6	Uncharacterized protein	SubName: Full=Uncharacterized protein {ECO:0000313|EMBL:EMC92761.1};	bcom:BAUCODRAFT_125737		XP_007680099.1		EOG092C5QWN
	TRINITY_DN53252_c0_g1_i2	tr|A9V6T2|A9V6T2_MONBE	Monosiga brevicollis (Choanoflagellate)	33649	ORFNames=33649 {ECO:0000313|EMBL:EDQ86861.1};	A9V6T2_MONBE	A9V6T2	Predicted protein	SubName: Full=Predicted protein {ECO:0000313|EMBL:EDQ86861.1};	mbr:MONBRDRAFT_33649	IPR036850	XP_001748406.1	ENOG410IKKA;ENOG4111F92
	TRINITY_DN53252_c0_g1_i1	tr|A9V6T2|A9V6T2_MONBE	Monosiga brevicollis (Choanoflagellate)	33649	ORFNames=33649 {ECO:0000313|EMBL:EDQ86861.1};	A9V6T2_MONBE	A9V6T2	Predicted protein	SubName: Full=Predicted protein {ECO:0000313|EMBL:EDQ86861.1};	mbr:MONBRDRAFT_33649	IPR036850	XP_001748406.1	ENOG410IKKA;ENOG4111F92
	TRINITY_DN53226_c1_g1_i1	tr|I1GWK2|I1GWK2_BRADI	Brachypodium distachyon (Purple false brome) (Trachynia distachya)	LOC100837358 BRADI_1g33850	Name=LOC100837358 {ECO:0000313|EnsemblPlants:BRADI1G33850.1}; ORFNames=BRADI_1g33850 {ECO:0000313|EMBL:KQK17344.1};	I1GWK2_BRADI	I1GWK2	Uncharacterized protein	SubName: Full=Uncharacterized protein {ECO:0000313|EMBL:KQK17344.1, ECO:0000313|EnsemblPlants:BRADI1G33850.1};	bdi:100837358	IPR012340;IPR005570	XP_010227403.1	KOG3400;ENOG4111FT0	EOG09360QN6	PF03870		PTHR10917
	TRINITY_DN53268_c0_g2_i2	tr|I1HR80|I1HR80_BRADI	Brachypodium distachyon (Purple false brome) (Trachynia distachya)	LOC100837878 BRADI_2g48920	Name=LOC100837878 {ECO:0000313|EnsemblPlants:BRADI2G48920.3}; ORFNames=BRADI_2g48920 {ECO:0000313|EMBL:KQK09587.1};	I1HR80_BRADI	I1HR80	Uncharacterized protein	SubName: Full=Uncharacterized protein {ECO:0000313|EMBL:KQK09587.1, ECO:0000313|EnsemblPlants:BRADI2G48920.3};	bdi:100837878	IPR007248	XP_003569729.1;XP_003569730.1;XP_010232263.1	KOG1944;ENOG4111SYH	EOG09360MO9	PF04117		PTHR11266
	TRINITY_DN53268_c0_g2_i1	tr|I1HR80|I1HR80_BRADI	Brachypodium distachyon (Purple false brome) (Trachynia distachya)	LOC100837878 BRADI_2g48920	Name=LOC100837878 {ECO:0000313|EnsemblPlants:BRADI2G48920.3}; ORFNames=BRADI_2g48920 {ECO:0000313|EMBL:KQK09587.1};	I1HR80_BRADI	I1HR80	Uncharacterized protein	SubName: Full=Uncharacterized protein {ECO:0000313|EMBL:KQK09587.1, ECO:0000313|EnsemblPlants:BRADI2G48920.3};	bdi:100837878	IPR007248	XP_003569729.1;XP_003569730.1;XP_010232263.1	KOG1944;ENOG4111SYH	EOG09360MO9	PF04117		PTHR11266
	TRINITY_DN76998_c0_g1_i1	sp|Q9FTT3|TPT_ORYSJ	Oryza sativa subsp. japonica (Rice)	TPT Os01g0239200, LOC_Os01g13770 OSJNBa0010K01.4, OSJNBa0086P08.33	Name=TPT; OrderedLocusNames=Os01g0239200, LOC_Os01g13770; ORFNames=OSJNBa0010K01.4, OSJNBa0086P08.33;	TPT_ORYSJ	Q9FTT3	Triose phosphate/phosphate translocator TPT, chloroplastic	RecName: Full=Triose phosphate/phosphate translocator TPT, chloroplastic; Flags: Precursor;	osa:4326365	IPR004853;IPR004696	XP_015619081.1	KOG1441;ENOG410XP1S	EOG09360HUZ	PF03151			TIGR00817
	TRINITY_DN76983_c1_g2_i1	sp|Q93ZY3|STT3A_ARATH	Arabidopsis thaliana (Mouse-ear cress)	STT3A At5g19690 T29J13_110	Name=STT3A; OrderedLocusNames=At5g19690; ORFNames=T29J13_110;	STT3A_ARATH	Q93ZY3	Dolichyl-diphosphooligosaccharide--protein glycosyltransferase subunit STT3A; Oligosaccharyl transferase subunit STT3A; STT3-A; Integral membrane protein 1; Protein STAUROSPORIN AND TEMPERATURE SENSITIVE 3-LIKE A	RecName: Full=Dolichyl-diphosphooligosaccharide--protein glycosyltransferase subunit STT3A; Short=Oligosaccharyl transferase subunit STT3A; Short=STT3-A; EC=2.4.99.18; AltName: Full=Integral membrane protein 1; AltName: Full=Protein STAUROSPORIN AND TEMPERATURE SENSITIVE 3-LIKE A;	ath:AT5G19690	IPR003674	NP_568380.1	KOG2292;COG1287	EOG093603HW	PF02516
	TRINITY_DN80931_c0_g1_i1	tr|A7SV09|A7SV09_NEMVE	Nematostella vectensis (Starlet sea anemone)	v1g66289, v1g69194	ORFNames=v1g66289 {ECO:0000313|EMBL:EDO32456.1}, v1g69194 {ECO:0000313|EMBL:EDO26525.1};	A7SV09_NEMVE	A7SV09	Predicted protein	SubName: Full=Predicted protein {ECO:0000313|EMBL:EDO32456.1}; Flags: Fragment;	nve:NEMVE_v1g66289;nve:NEMVE_v1g69194		XP_001618625.1;XP_001624556.1	ENOG410J3IG;ENOG41127TG	EOG091G1BRA
	TRINITY_DN80931_c0_g2_i4	tr|A7SUM5|A7SUM5_NEMVE	Nematostella vectensis (Starlet sea anemone)	v1g132528	ORFNames=v1g132528 {ECO:0000313|EMBL:EDO32597.1};	A7SUM5_NEMVE	A7SUM5	Predicted protein	SubName: Full=Predicted protein {ECO:0000313|EMBL:EDO32597.1}; Flags: Fragment;	nve:NEMVE_v1g132528		XP_001624697.1	ENOG410J3IG;ENOG41127TG	EOG091G1BRA
	TRINITY_DN80942_c0_g1_i1	tr|V2YRM2|V2YRM2_MONRO	Moniliophthora roreri (strain MCA 2997) (Cocoa frosty pod rot fungus) (Crinipellis roreri)	Moror_8224	ORFNames=Moror_8224 {ECO:0000313|EMBL:ESK94314.1};	V2YRM2_MONRO	V2YRM2	40S ribosomal protein S6	RecName: Full=40S ribosomal protein S6 {ECO:0000256|PIRNR:PIRNR002129};	mrr:Moror_8224	IPR014401;IPR001377;IPR018282	XP_007846383.1		EOG092C4QCP	PF01092	PS00578	PTHR11502
	TRINITY_DN80915_c0_g1_i2	tr|A9U156|A9U156_PHYPA	Physcomitrella patens subsp. patens (Moss)	PHYPADRAFT_173117	ORFNames=PHYPADRAFT_173117 {ECO:0000313|EMBL:EDQ50611.1};	A9U156_PHYPA	A9U156	Predicted protein	SubName: Full=Predicted protein {ECO:0000313|EMBL:EDQ50611.1};	ppp:PHYPADRAFT_173117	IPR000851;IPR005324;IPR020568;IPR014721;IPR005711;IPR013810;IPR018192	XP_001784592.1	KOG0877;COG0098		PF00333;PF03719	PS00585;PS50881	PTHR13718	TIGR01020
	TRINITY_DN80915_c0_g1_i1	tr|A9U156|A9U156_PHYPA	Physcomitrella patens subsp. patens (Moss)	PHYPADRAFT_173117	ORFNames=PHYPADRAFT_173117 {ECO:0000313|EMBL:EDQ50611.1};	A9U156_PHYPA	A9U156	Predicted protein	SubName: Full=Predicted protein {ECO:0000313|EMBL:EDQ50611.1};	ppp:PHYPADRAFT_173117	IPR000851;IPR005324;IPR020568;IPR014721;IPR005711;IPR013810;IPR018192	XP_001784592.1	KOG0877;COG0098		PF00333;PF03719	PS00585;PS50881	PTHR13718	TIGR01020
	TRINITY_DN44607_c0_g1_i1	tr|A0A1E7FB62|A0A1E7FB62_9STRA	Fragilariopsis cylindrus CCMP1102	FRACYDRAFT_275536	ORFNames=FRACYDRAFT_275536 {ECO:0000313|EMBL:OEU15063.1};	A0A1E7FB62_9STRA	A0A1E7FB62	Uncharacterized protein	SubName: Full=Uncharacterized protein {ECO:0000313|EMBL:OEU15063.1};	fcy:FRACYDRAFT_275536	IPR005818;IPR005819;IPR036388;IPR036390				PF00538	PS51504
	TRINITY_DN44607_c0_g1_i2	tr|A0A1E7FB62|A0A1E7FB62_9STRA	Fragilariopsis cylindrus CCMP1102	FRACYDRAFT_275536	ORFNames=FRACYDRAFT_275536 {ECO:0000313|EMBL:OEU15063.1};	A0A1E7FB62_9STRA	A0A1E7FB62	Uncharacterized protein	SubName: Full=Uncharacterized protein {ECO:0000313|EMBL:OEU15063.1};	fcy:FRACYDRAFT_275536	IPR005818;IPR005819;IPR036388;IPR036390				PF00538	PS51504
	TRINITY_DN44663_c1_g1_i2	tr|A0A0Q3H2T0|A0A0Q3H2T0_BRADI	Brachypodium distachyon (Purple false brome) (Trachynia distachya)	BRADI_1g32951	ORFNames=BRADI_1g32951 {ECO:0000313|EMBL:KQK17191.1};	A0A0Q3H2T0_BRADI	A0A0Q3H2T0	Uncharacterized protein	SubName: Full=Uncharacterized protein {ECO:0000313|EMBL:KQK17191.1};	bdi:100828746	IPR004330;IPR031052;IPR018289	XP_014753620.1			PF03101;PF10551		PTHR31669
	TRINITY_DN39250_c1_g1_i1	sp|P10995|ACT2_XENLA	Xenopus laevis (African clawed frog)	act2	Name=act2;	ACT2_XENLA	P10995	Actin, alpha skeletal muscle 2; Actin alpha 2; alpha2; alpha2p	RecName: Full=Actin, alpha skeletal muscle 2; AltName: Full=Actin alpha 2; Short=alpha2; Short=alpha2p; Flags: Precursor;	xla:779129	IPR004000;IPR020902;IPR004001	NP_001090226.1			PF00022	PS00406;PS00432;PS01132	PTHR11937
	TRINITY_DN39233_c0_g1_i15	tr|I1HTR7|I1HTR7_BRADI	Brachypodium distachyon (Purple false brome) (Trachynia distachya)	LOC100824168 BRADI_2g56120	Name=LOC100824168 {ECO:0000313|EnsemblPlants:BRADI2G56120.2}; ORFNames=BRADI_2g56120 {ECO:0000313|EMBL:KQK10777.1};	I1HTR7_BRADI	I1HTR7	Uncharacterized protein	SubName: Full=Uncharacterized protein {ECO:0000313|EMBL:KQK10777.1, ECO:0000313|EnsemblPlants:BRADI2G56120.2};	bdi:100824168	IPR006536;IPR035979;IPR000504	XP_003564696.1	KOG1190;ENOG410XPMZ	EOG093609DY	PF00076	PS50102		TIGR01649
	TRINITY_DN39233_c0_g1_i13	tr|I1HTR7|I1HTR7_BRADI	Brachypodium distachyon (Purple false brome) (Trachynia distachya)	LOC100824168 BRADI_2g56120	Name=LOC100824168 {ECO:0000313|EnsemblPlants:BRADI2G56120.2}; ORFNames=BRADI_2g56120 {ECO:0000313|EMBL:KQK10777.1};	I1HTR7_BRADI	I1HTR7	Uncharacterized protein	SubName: Full=Uncharacterized protein {ECO:0000313|EMBL:KQK10777.1, ECO:0000313|EnsemblPlants:BRADI2G56120.2};	bdi:100824168	IPR006536;IPR035979;IPR000504	XP_003564696.1	KOG1190;ENOG410XPMZ	EOG093609DY	PF00076	PS50102		TIGR01649
	TRINITY_DN39221_c0_g1_i2	tr|A0A1D6DWQ9|A0A1D6DWQ9_MAIZE	Zea mays (Maize)	103645864 ZEAMMB73_Zm00001d002119	Name=103645864 {ECO:0000313|EnsemblPlants:Zm00001d002119_P003}; ORFNames=ZEAMMB73_Zm00001d002119 {ECO:0000313|EMBL:ONM13113.1};	A0A1D6DWQ9_MAIZE	A0A1D6DWQ9	ABC transporter B family member 19	SubName: Full=ABC transporter B family member 19 {ECO:0000313|EMBL:ONM13113.1};	zma:103645864	IPR003593;IPR011527;IPR036640;IPR003439;IPR017871;IPR027417	XP_008668793.1			PF00664;PF00005	PS50929;PS00211;PS50893
	TRINITY_DN39262_c0_g1_i1	tr|A0A1S2YNE3|A0A1S2YNE3_CICAR	Cicer arietinum (Chickpea) (Garbanzo)	LOC101506557	Name=LOC101506557 {ECO:0000313|RefSeq:XP_004507448.1};	A0A1S2YNE3_CICAR	A0A1S2YNE3	glycine-rich RNA-binding, abscisic acid-inducible protein-like	SubName: Full=glycine-rich RNA-binding, abscisic acid-inducible protein-like {ECO:0000313|RefSeq:XP_004507448.1};	cam:101506557	IPR035979;IPR000504	XP_004507448.1			PF00076	PS50102
	TRINITY_DN39262_c0_g2_i1	tr|A0A1S2YND7|A0A1S2YND7_CICAR	Cicer arietinum (Chickpea) (Garbanzo)	LOC101507444	Name=LOC101507444 {ECO:0000313|RefSeq:XP_004507451.1};	A0A1S2YND7_CICAR	A0A1S2YND7	glycine-rich RNA-binding, abscisic acid-inducible protein-like	SubName: Full=glycine-rich RNA-binding, abscisic acid-inducible protein-like {ECO:0000313|RefSeq:XP_004507451.1};	cam:101507444	IPR035979;IPR000504	XP_004507451.1			PF00076	PS50102
	TRINITY_DN54009_c0_g1_i1	sp|P0DM41|ACT1_CAEEL	Caenorhabditis elegans	act-1 T04C12.6	Name=act-1; ORFNames=T04C12.6;	ACT1_CAEEL	P0DM41	Actin-1	RecName: Full=Actin-1; Flags: Precursor;	cel:CELE_T04C12.4;cel:CELE_T04C12.6	IPR004000;IPR020902;IPR004001	NP_505817.1;NP_505819.1	KOG0676;COG5277	EOG091G08LD	PF00022	PS00406;PS00432;PS01132	PTHR11937
	TRINITY_DN54028_c0_g1_i1	tr|K4A807|K4A807_SETIT	Setaria italica (Foxtail millet) (Panicum italicum)	LOC101776731 SETIT_035013mg	Name=LOC101776731 {ECO:0000313|EnsemblPlants:Si035013m}; ORFNames=SETIT_035013mg {ECO:0000313|EMBL:KQK86474.1};	K4A807_SETIT	K4A807	Uncharacterized protein	SubName: Full=Uncharacterized protein {ECO:0000313|EMBL:KQK86474.1, ECO:0000313|EnsemblPlants:Si035013m};	sita:101776731	IPR030393;IPR019987;IPR006073;IPR027417	XP_004981282.1	KOG2486;COG0218	EOG09360C6T	PF01926	PS51706		TIGR03598
	TRINITY_DN7294_c0_g1_i1	tr|I1I4K0|I1I4K0_BRADI	Brachypodium distachyon (Purple false brome) (Trachynia distachya)	LOC100830844 BRADI_3g28350	Name=LOC100830844 {ECO:0000313|EnsemblPlants:BRADI3G28350.1}; ORFNames=BRADI_3g28350 {ECO:0000313|EMBL:KQJ97023.1};	I1I4K0_BRADI	I1I4K0	Cellulose synthase	RecName: Full=Cellulose synthase {ECO:0000256|RuleBase:RU361116}; EC=2.4.1.12 {ECO:0000256|RuleBase:RU361116};	bdi:100830844	IPR005150;IPR027934;IPR029044;IPR013083	XP_003574029.1	ENOG410IRAS;COG1215	EOG093601AL	PF03552;PF14569
	TRINITY_DN74804_c0_g2_i2	tr|J3KX40|J3KX40_ORYBR	Oryza brachyantha (malo sina)	102720368	Name=102720368 {ECO:0000313|EnsemblPlants:OB01G15460.1};	J3KX40_ORYBR	J3KX40	Uncharacterized protein	SubName: Full=Uncharacterized protein {ECO:0000313|EnsemblPlants:OB01G15460.1};	obr:102720368	IPR001412;IPR004514;IPR007638;IPR007639;IPR000924;IPR020061;IPR020058;IPR020059;IPR020056;IPR011035;IPR014729	XP_006643850.1	KOG1148;COG0008	EOG0936042Y	PF00749;PF03950;PF04558;PF04557	PS00178		TIGR00440
	TRINITY_DN74804_c0_g2_i6	tr|I1J0N0|I1J0N0_BRADI	Brachypodium distachyon (Purple false brome) (Trachynia distachya)	BRADI_5g18520	ORFNames=BRADI_5g18520 {ECO:0000313|EMBL:KQJ84074.1};	I1J0N0_BRADI	I1J0N0	Uncharacterized protein	SubName: Full=Uncharacterized protein {ECO:0000313|EMBL:KQJ84074.1, ECO:0000313|EnsemblPlants:BRADI5G18520.2};	bdi:100834167	IPR014001;IPR001650;IPR027417;IPR000330	XP_010240268.1	KOG0389;ENOG410XNUT	EOG093602Y5	PF00271;PF00176	PS51192;PS51194
	TRINITY_DN74804_c0_g2_i8	tr|J3KX40|J3KX40_ORYBR	Oryza brachyantha (malo sina)	102720368	Name=102720368 {ECO:0000313|EnsemblPlants:OB01G15460.1};	J3KX40_ORYBR	J3KX40	Uncharacterized protein	SubName: Full=Uncharacterized protein {ECO:0000313|EnsemblPlants:OB01G15460.1};	obr:102720368	IPR001412;IPR004514;IPR007638;IPR007639;IPR000924;IPR020061;IPR020058;IPR020059;IPR020056;IPR011035;IPR014729	XP_006643850.1	KOG1148;COG0008	EOG0936042Y	PF00749;PF03950;PF04558;PF04557	PS00178		TIGR00440
	TRINITY_DN74804_c0_g2_i11	tr|J3KX40|J3KX40_ORYBR	Oryza brachyantha (malo sina)	102720368	Name=102720368 {ECO:0000313|EnsemblPlants:OB01G15460.1};	J3KX40_ORYBR	J3KX40	Uncharacterized protein	SubName: Full=Uncharacterized protein {ECO:0000313|EnsemblPlants:OB01G15460.1};	obr:102720368	IPR001412;IPR004514;IPR007638;IPR007639;IPR000924;IPR020061;IPR020058;IPR020059;IPR020056;IPR011035;IPR014729	XP_006643850.1	KOG1148;COG0008	EOG0936042Y	PF00749;PF03950;PF04558;PF04557	PS00178		TIGR00440
	TRINITY_DN74804_c0_g2_i4	tr|J3KX40|J3KX40_ORYBR	Oryza brachyantha (malo sina)	102720368	Name=102720368 {ECO:0000313|EnsemblPlants:OB01G15460.1};	J3KX40_ORYBR	J3KX40	Uncharacterized protein	SubName: Full=Uncharacterized protein {ECO:0000313|EnsemblPlants:OB01G15460.1};	obr:102720368	IPR001412;IPR004514;IPR007638;IPR007639;IPR000924;IPR020061;IPR020058;IPR020059;IPR020056;IPR011035;IPR014729	XP_006643850.1	KOG1148;COG0008	EOG0936042Y	PF00749;PF03950;PF04558;PF04557	PS00178		TIGR00440
	TRINITY_DN74804_c0_g2_i1	tr|J3KX40|J3KX40_ORYBR	Oryza brachyantha (malo sina)	102720368	Name=102720368 {ECO:0000313|EnsemblPlants:OB01G15460.1};	J3KX40_ORYBR	J3KX40	Uncharacterized protein	SubName: Full=Uncharacterized protein {ECO:0000313|EnsemblPlants:OB01G15460.1};	obr:102720368	IPR001412;IPR004514;IPR007638;IPR007639;IPR000924;IPR020061;IPR020058;IPR020059;IPR020056;IPR011035;IPR014729	XP_006643850.1	KOG1148;COG0008	EOG0936042Y	PF00749;PF03950;PF04558;PF04557	PS00178		TIGR00440
	TRINITY_DN74804_c0_g2_i9	tr|I1J0N0|I1J0N0_BRADI	Brachypodium distachyon (Purple false brome) (Trachynia distachya)	BRADI_5g18520	ORFNames=BRADI_5g18520 {ECO:0000313|EMBL:KQJ84074.1};	I1J0N0_BRADI	I1J0N0	Uncharacterized protein	SubName: Full=Uncharacterized protein {ECO:0000313|EMBL:KQJ84074.1, ECO:0000313|EnsemblPlants:BRADI5G18520.2};	bdi:100834167	IPR014001;IPR001650;IPR027417;IPR000330	XP_010240268.1	KOG0389;ENOG410XNUT	EOG093602Y5	PF00271;PF00176	PS51192;PS51194
	TRINITY_DN74875_c0_g1_i1	sp|Q6Z0I4|FABI1_ORYSJ	Oryza sativa subsp. japonica (Rice)	Os08g0327400, LOC_Os08g23810 OSJNBa0049I01.2, P0670E08.13	OrderedLocusNames=Os08g0327400, LOC_Os08g23810; ORFNames=OSJNBa0049I01.2, P0670E08.13;	FABI1_ORYSJ	Q6Z0I4	Enoyl-[acyl-carrier-protein] reductase [NADH] 1, chloroplastic; ENR; NADH-dependent enoyl-ACP reductase	RecName: Full=Enoyl-[acyl-carrier-protein] reductase [NADH] 1, chloroplastic; Short=ENR; EC=1.3.1.9; AltName: Full=NADH-dependent enoyl-ACP reductase; Flags: Precursor;	osa:4345286	IPR036291;IPR002347	XP_015648059.1;XP_015648060.1	ENOG410IQSQ;COG0623	EOG09360GOD
	TRINITY_DN35282_c0_g1_i1	tr|I1H4Q8|I1H4Q8_BRADI	Brachypodium distachyon (Purple false brome) (Trachynia distachya)	LOC100839938 BRADI_1g60320	Name=LOC100839938 {ECO:0000313|EnsemblPlants:BRADI1G60320.1}; ORFNames=BRADI_1g60320 {ECO:0000313|EMBL:KQK21348.1};	I1H4Q8_BRADI	I1H4Q8	Sucrose synthase	RecName: Full=Sucrose synthase {ECO:0000256|RuleBase:RU280817}; EC=2.4.1.13 {ECO:0000256|RuleBase:RU280817};	bdi:100839938	IPR001296;IPR000368;IPR012820	XP_003557752.1;XP_010228516.1;XP_010228517.1	KOG0853;COG0438	EOG0936023J	PF00534;PF00862			TIGR02470
	TRINITY_DN43590_c0_g1_i1	tr|A0A059CUW4|A0A059CUW4_EUCGR	Eucalyptus grandis (Flooded gum)	EUGRSUZ_C03690	ORFNames=EUGRSUZ_C03690 {ECO:0000313|EMBL:KCW82273.1};	A0A059CUW4_EUCGR	A0A059CUW4	Uncharacterized protein	SubName: Full=Uncharacterized protein {ECO:0000313|EMBL:KCW82273.1};	egr:104438183	IPR000054;IPR020052;IPR023621	XP_010049571.1			PF01198	PS01144	PTHR10956
	TRINITY_DN43526_c0_g1_i2	tr|I1HES0|I1HES0_BRADI	Brachypodium distachyon (Purple false brome) (Trachynia distachya)	LOC100826754 BRADI_2g11350	Name=LOC100826754 {ECO:0000313|EnsemblPlants:BRADI2G11350.1}; ORFNames=BRADI_2g11350 {ECO:0000313|EMBL:KQK04044.1};	I1HES0_BRADI	I1HES0	Uncharacterized protein	SubName: Full=Uncharacterized protein {ECO:0000313|EMBL:KQK04044.1, ECO:0000313|EnsemblPlants:BRADI2G11350.1};	bdi:100826754	IPR015655;IPR000222;IPR036457;IPR001932	XP_003567571.1	KOG0698;COG0631	EOG09360E05	PF00481	PS01032;PS51746	PTHR13832
	TRINITY_DN43526_c0_g1_i1	tr|I1HES0|I1HES0_BRADI	Brachypodium distachyon (Purple false brome) (Trachynia distachya)	LOC100826754 BRADI_2g11350	Name=LOC100826754 {ECO:0000313|EnsemblPlants:BRADI2G11350.1}; ORFNames=BRADI_2g11350 {ECO:0000313|EMBL:KQK04044.1};	I1HES0_BRADI	I1HES0	Uncharacterized protein	SubName: Full=Uncharacterized protein {ECO:0000313|EMBL:KQK04044.1, ECO:0000313|EnsemblPlants:BRADI2G11350.1};	bdi:100826754	IPR015655;IPR000222;IPR036457;IPR001932	XP_003567571.1	KOG0698;COG0631	EOG09360E05	PF00481	PS01032;PS51746	PTHR13832
	TRINITY_DN43513_c0_g2_i2	tr|A2E2T7|A2E2T7_TRIVA	Trichomonas vaginalis	TVAG_077290	ORFNames=TVAG_077290 {ECO:0000313|EMBL:EAY12992.1};	A2E2T7_TRIVA	A2E2T7	CMGC family protein kinase	SubName: Full=CMGC family protein kinase {ECO:0000313|EMBL:EAY12992.1};	tva:TVAG_077290	IPR011009;IPR000719;IPR008271	XP_001325215.1	KOG0667;ENOG410XPET		PF00069	PS50011;PS00108
	TRINITY_DN43513_c0_g2_i3	tr|A2E2T7|A2E2T7_TRIVA	Trichomonas vaginalis	TVAG_077290	ORFNames=TVAG_077290 {ECO:0000313|EMBL:EAY12992.1};	A2E2T7_TRIVA	A2E2T7	CMGC family protein kinase	SubName: Full=CMGC family protein kinase {ECO:0000313|EMBL:EAY12992.1};	tva:TVAG_077290	IPR011009;IPR000719;IPR008271	XP_001325215.1	KOG0667;ENOG410XPET		PF00069	PS50011;PS00108
	TRINITY_DN43513_c0_g2_i4	tr|A2E2T7|A2E2T7_TRIVA	Trichomonas vaginalis	TVAG_077290	ORFNames=TVAG_077290 {ECO:0000313|EMBL:EAY12992.1};	A2E2T7_TRIVA	A2E2T7	CMGC family protein kinase	SubName: Full=CMGC family protein kinase {ECO:0000313|EMBL:EAY12992.1};	tva:TVAG_077290	IPR011009;IPR000719;IPR008271	XP_001325215.1	KOG0667;ENOG410XPET		PF00069	PS50011;PS00108
	TRINITY_DN43513_c0_g2_i1	tr|A2E2T7|A2E2T7_TRIVA	Trichomonas vaginalis	TVAG_077290	ORFNames=TVAG_077290 {ECO:0000313|EMBL:EAY12992.1};	A2E2T7_TRIVA	A2E2T7	CMGC family protein kinase	SubName: Full=CMGC family protein kinase {ECO:0000313|EMBL:EAY12992.1};	tva:TVAG_077290	IPR011009;IPR000719;IPR008271	XP_001325215.1	KOG0667;ENOG410XPET		PF00069	PS50011;PS00108
	TRINITY_DN43513_c0_g2_i5	tr|A2E2T7|A2E2T7_TRIVA	Trichomonas vaginalis	TVAG_077290	ORFNames=TVAG_077290 {ECO:0000313|EMBL:EAY12992.1};	A2E2T7_TRIVA	A2E2T7	CMGC family protein kinase	SubName: Full=CMGC family protein kinase {ECO:0000313|EMBL:EAY12992.1};	tva:TVAG_077290	IPR011009;IPR000719;IPR008271	XP_001325215.1	KOG0667;ENOG410XPET		PF00069	PS50011;PS00108
	TRINITY_DN94214_c0_g1_i1	tr|A0A1S2XF40|A0A1S2XF40_CICAR	Cicer arietinum (Chickpea) (Garbanzo)	LOC101493464	Name=LOC101493464 {ECO:0000313|RefSeq:XP_004488386.1, ECO:0000313|RefSeq:XP_004488387.1};	A0A1S2XF40_CICAR	A0A1S2XF40	putative GPI-anchor transamidase	SubName: Full=putative GPI-anchor transamidase {ECO:0000313|RefSeq:XP_004488386.1, ECO:0000313|RefSeq:XP_004488387.1};	cam:101493464	IPR028361;IPR001096	XP_004488386.1;XP_004488387.1			PF01650		PTHR12000;PTHR12000:SF1
	TRINITY_DN88870_c0_g1_i16	tr|I1HBF1|I1HBF1_BRADI	Brachypodium distachyon (Purple false brome) (Trachynia distachya)	LOC100836759 BRADI_2g01370	Name=LOC100836759 {ECO:0000313|EnsemblPlants:BRADI2G01370.1}; ORFNames=BRADI_2g01370 {ECO:0000313|EMBL:KQK02431.1};	I1HBF1_BRADI	I1HBF1	Uncharacterized protein	SubName: Full=Uncharacterized protein {ECO:0000313|EMBL:KQK02431.1, ECO:0000313|EnsemblPlants:BRADI2G01370.1};	bdi:100836759	IPR004277	XP_003567603.1	KOG2735;ENOG410XS7H	EOG093608O4	PF03034
	TRINITY_DN88870_c0_g1_i3	tr|I1HBF1|I1HBF1_BRADI	Brachypodium distachyon (Purple false brome) (Trachynia distachya)	LOC100836759 BRADI_2g01370	Name=LOC100836759 {ECO:0000313|EnsemblPlants:BRADI2G01370.1}; ORFNames=BRADI_2g01370 {ECO:0000313|EMBL:KQK02431.1};	I1HBF1_BRADI	I1HBF1	Uncharacterized protein	SubName: Full=Uncharacterized protein {ECO:0000313|EMBL:KQK02431.1, ECO:0000313|EnsemblPlants:BRADI2G01370.1};	bdi:100836759	IPR004277	XP_003567603.1	KOG2735;ENOG410XS7H	EOG093608O4	PF03034
	TRINITY_DN38544_c0_g1_i2	tr|I1I4K0|I1I4K0_BRADI	Brachypodium distachyon (Purple false brome) (Trachynia distachya)	LOC100830844 BRADI_3g28350	Name=LOC100830844 {ECO:0000313|EnsemblPlants:BRADI3G28350.1}; ORFNames=BRADI_3g28350 {ECO:0000313|EMBL:KQJ97023.1};	I1I4K0_BRADI	I1I4K0	Cellulose synthase	RecName: Full=Cellulose synthase {ECO:0000256|RuleBase:RU361116}; EC=2.4.1.12 {ECO:0000256|RuleBase:RU361116};	bdi:100830844	IPR005150;IPR027934;IPR029044;IPR013083	XP_003574029.1	ENOG410IRAS;COG1215	EOG093601AL	PF03552;PF14569
	TRINITY_DN39052_c0_g1_i1	tr|M0SWV0|M0SWV0_MUSAM	Musa acuminata subsp. malaccensis (Wild banana) (Musa malaccensis)	103984281	Name=103984281 {ECO:0000313|EnsemblPlants:GSMUA_Achr5P08710_001};	M0SWV0_MUSAM	M0SWV0	Uncharacterized protein	SubName: Full=Uncharacterized protein {ECO:0000313|EnsemblPlants:GSMUA_Achr5P08710_001};	mus:103984281	IPR001925;IPR027246	XP_009400023.1		EOG09360J2F	PF01459	PS00558
	TRINITY_DN39000_c0_g1_i6	tr|B7G9D4|B7G9D4_PHATC	Phaeodactylum tricornutum (strain CCAP 1055/1)	PHATRDRAFT_49064	ORFNames=PHATRDRAFT_49064 {ECO:0000313|EMBL:EEC44938.1};	B7G9D4_PHATC	B7G9D4	Predicted protein	SubName: Full=Predicted protein {ECO:0000313|EMBL:EEC44938.1};	pti:PHATRDRAFT_49064	IPR018461	XP_002183756.1			PF03553
	TRINITY_DN39000_c0_g1_i1	tr|B7G9D4|B7G9D4_PHATC	Phaeodactylum tricornutum (strain CCAP 1055/1)	PHATRDRAFT_49064	ORFNames=PHATRDRAFT_49064 {ECO:0000313|EMBL:EEC44938.1};	B7G9D4_PHATC	B7G9D4	Predicted protein	SubName: Full=Predicted protein {ECO:0000313|EMBL:EEC44938.1};	pti:PHATRDRAFT_49064	IPR018461	XP_002183756.1			PF03553
	TRINITY_DN39000_c0_g1_i4	tr|B7G9D4|B7G9D4_PHATC	Phaeodactylum tricornutum (strain CCAP 1055/1)	PHATRDRAFT_49064	ORFNames=PHATRDRAFT_49064 {ECO:0000313|EMBL:EEC44938.1};	B7G9D4_PHATC	B7G9D4	Predicted protein	SubName: Full=Predicted protein {ECO:0000313|EMBL:EEC44938.1};	pti:PHATRDRAFT_49064	IPR018461	XP_002183756.1			PF03553
	TRINITY_DN39096_c0_g1_i1	tr|I1HLR9|I1HLR9_BRADI	Brachypodium distachyon (Purple false brome) (Trachynia distachya)	LOC100820903 BRADI_2g35680	Name=LOC100820903 {ECO:0000313|EnsemblPlants:BRADI2G35680.1}; ORFNames=BRADI_2g35680 {ECO:0000313|EMBL:KQK07476.1};	I1HLR9_BRADI	I1HLR9	Uncharacterized protein	SubName: Full=Uncharacterized protein {ECO:0000313|EMBL:KQK07476.1, ECO:0000313|EnsemblPlants:BRADI2G35680.1};	bdi:100820903	IPR006195;IPR004154;IPR036621;IPR001106;IPR015807;IPR004516;IPR033656;IPR008948	XP_003568918.1	KOG1936;COG0124	EOG093605TL	PF03129;PF00221	PS50862	PTHR11476	TIGR00442
	TRINITY_DN56903_c0_g1_i1	tr|K7VJC3|K7VJC3_MAIZE	Zea mays (Maize)	103639290 ZEAMMB73_Zm00001d047769	Name=103639290 {ECO:0000313|EnsemblPlants:Zm00001d047769_P001}; ORFNames=ZEAMMB73_Zm00001d047769 {ECO:0000313|EMBL:AQL07563.1};	K7VJC3_MAIZE	K7VJC3	Calcium pump3	SubName: Full=Calcium pump3 {ECO:0000313|EMBL:AQL07563.1};	zma:103639290	IPR006068;IPR004014;IPR023299;IPR018303;IPR023298;IPR008250;IPR036412;IPR001757	XP_008660272.1		EOG093600UE	PF00689;PF00690	PS00154		TIGR01494
	TRINITY_DN56903_c0_g1_i3	tr|K7VJC3|K7VJC3_MAIZE	Zea mays (Maize)	103639290 ZEAMMB73_Zm00001d047769	Name=103639290 {ECO:0000313|EnsemblPlants:Zm00001d047769_P001}; ORFNames=ZEAMMB73_Zm00001d047769 {ECO:0000313|EMBL:AQL07563.1};	K7VJC3_MAIZE	K7VJC3	Calcium pump3	SubName: Full=Calcium pump3 {ECO:0000313|EMBL:AQL07563.1};	zma:103639290	IPR006068;IPR004014;IPR023299;IPR018303;IPR023298;IPR008250;IPR036412;IPR001757	XP_008660272.1		EOG093600UE	PF00689;PF00690	PS00154		TIGR01494
	TRINITY_DN56903_c0_g1_i2	tr|K7VJC3|K7VJC3_MAIZE	Zea mays (Maize)	103639290 ZEAMMB73_Zm00001d047769	Name=103639290 {ECO:0000313|EnsemblPlants:Zm00001d047769_P001}; ORFNames=ZEAMMB73_Zm00001d047769 {ECO:0000313|EMBL:AQL07563.1};	K7VJC3_MAIZE	K7VJC3	Calcium pump3	SubName: Full=Calcium pump3 {ECO:0000313|EMBL:AQL07563.1};	zma:103639290	IPR006068;IPR004014;IPR023299;IPR018303;IPR023298;IPR008250;IPR036412;IPR001757	XP_008660272.1		EOG093600UE	PF00689;PF00690	PS00154		TIGR01494
	TRINITY_DN23590_c0_g2_i1	tr|Q0D632|Q0D632_ORYSJ	Oryza sativa subsp. japonica (Rice)	Os07g0515700	OrderedLocusNames=Os07g0515700 {ECO:0000313|EMBL:BAF21691.2};	Q0D632_ORYSJ	Q0D632	Os07g0515700 protein; cDNA clone:J033119G22, full insert sequence	SubName: Full=Os07g0515700 protein {ECO:0000313|EMBL:BAF21691.2}; SubName: Full=cDNA clone:J033119G22, full insert sequence {ECO:0000313|EMBL:BAG95899.1};	osa:4343375	IPR002110;IPR020683;IPR036770	XP_015645294.1;XP_015645295.1	ENOG410JWYT;ENOG41104GD	EOG09360BQI	PF00023	PS50297;PS50088
	TRINITY_DN23506_c0_g1_i2	tr|A0A1U8B987|A0A1U8B987_NELNU	Nelumbo nucifera (Sacred lotus)	LOC104611012	Name=LOC104611012 {ECO:0000313|RefSeq:XP_010276220.1};	A0A1U8B987_NELNU	A0A1U8B987	Glyceraldehyde-3-phosphate dehydrogenase	RecName: Full=Glyceraldehyde-3-phosphate dehydrogenase {ECO:0000256|RuleBase:RU361160}; EC=1.2.1.- {ECO:0000256|RuleBase:RU361160};	nnu:104611012	IPR020831;IPR020830;IPR020829;IPR020828;IPR006424;IPR036291	XP_010276220.1			PF02800;PF00044	PS00071	PTHR10836	TIGR01534
	TRINITY_DN23506_c0_g1_i3	tr|A0A1U8B987|A0A1U8B987_NELNU	Nelumbo nucifera (Sacred lotus)	LOC104611012	Name=LOC104611012 {ECO:0000313|RefSeq:XP_010276220.1};	A0A1U8B987_NELNU	A0A1U8B987	Glyceraldehyde-3-phosphate dehydrogenase	RecName: Full=Glyceraldehyde-3-phosphate dehydrogenase {ECO:0000256|RuleBase:RU361160}; EC=1.2.1.- {ECO:0000256|RuleBase:RU361160};	nnu:104611012	IPR020831;IPR020830;IPR020829;IPR020828;IPR006424;IPR036291	XP_010276220.1			PF02800;PF00044	PS00071	PTHR10836	TIGR01534
	TRINITY_DN23502_c0_g1_i1	tr|I1I2Z8|I1I2Z8_BRADI	Brachypodium distachyon (Purple false brome) (Trachynia distachya)	LOC100840631 BRADI_3g21200	Name=LOC100840631 {ECO:0000313|EnsemblPlants:BRADI3G21200.1}; ORFNames=BRADI_3g21200 {ECO:0000313|EMBL:KQJ96129.1};	I1I2Z8_BRADI	I1I2Z8	Uncharacterized protein	SubName: Full=Uncharacterized protein {ECO:0000313|EMBL:KQJ96129.1, ECO:0000313|EnsemblPlants:BRADI3G21200.1};	bdi:100840631	IPR011356;IPR000819;IPR023042;IPR008283	XP_010234597.1	KOG2597;COG0260	EOG09360HFN	PF00883;PF02789	PS00631	PTHR11963
	TRINITY_DN23589_c0_g1_i2	sp|Q7XKF3|PORA_ORYSJ	Oryza sativa subsp. japonica (Rice)	PORA Os04g0678700, LOC_Os04g58200 OsJ_16634, OSJNBb0017I01.1	Name=PORA; OrderedLocusNames=Os04g0678700, LOC_Os04g58200; ORFNames=OsJ_16634, OSJNBb0017I01.1;	PORA_ORYSJ	Q7XKF3	Protochlorophyllide reductase A, chloroplastic; PCR A; NADPH-protochlorophyllide oxidoreductase A; POR A	RecName: Full=Protochlorophyllide reductase A, chloroplastic; Short=PCR A; EC=1.3.1.33; AltName: Full=NADPH-protochlorophyllide oxidoreductase A; Short=POR A; Flags: Precursor;	osa:4337415	IPR036291;IPR005979;IPR002347	XP_015633866.1	KOG1208;COG1028	EOG09360CR9	PF00106		PTHR44419	TIGR01289
	TRINITY_DN40107_c1_g1_i20	tr|Q2QZV8|Q2QZV8_ORYSJ	Oryza sativa subsp. japonica (Rice)	Os11g0669100 LOC_Os11g44680, Os11g0669100 OSNPB_110669100	Name=Os11g0669100 {ECO:0000313|EMBL:BAT15187.1}; OrderedLocusNames=LOC_Os11g44680 {ECO:0000313|EMBL:ABA95220.1}, Os11g0669100 {ECO:0000313|EMBL:BAF28790.1}; ORFNames=OSNPB_110669100 {ECO:0000313|EMBL:BAT15187.1};	Q2QZV8_ORYSJ	Q2QZV8	Expressed protein; Os11g0669100 protein	SubName: Full=Expressed protein {ECO:0000313|EMBL:ABA95220.1}; SubName: Full=Os11g0669100 protein {ECO:0000313|EMBL:BAF28790.1};	osa:4351085	IPR012416	XP_015615412.1		EOG093604F4	PF07887
	TRINITY_DN40107_c1_g1_i6	tr|Q2QZV8|Q2QZV8_ORYSJ	Oryza sativa subsp. japonica (Rice)	Os11g0669100 LOC_Os11g44680, Os11g0669100 OSNPB_110669100	Name=Os11g0669100 {ECO:0000313|EMBL:BAT15187.1}; OrderedLocusNames=LOC_Os11g44680 {ECO:0000313|EMBL:ABA95220.1}, Os11g0669100 {ECO:0000313|EMBL:BAF28790.1}; ORFNames=OSNPB_110669100 {ECO:0000313|EMBL:BAT15187.1};	Q2QZV8_ORYSJ	Q2QZV8	Expressed protein; Os11g0669100 protein	SubName: Full=Expressed protein {ECO:0000313|EMBL:ABA95220.1}; SubName: Full=Os11g0669100 protein {ECO:0000313|EMBL:BAF28790.1};	osa:4351085	IPR012416	XP_015615412.1		EOG093604F4	PF07887
	TRINITY_DN40137_c0_g1_i3	tr|A0A0B5FQQ2|A0A0B5FQQ2_9DELT	Geoalkalibacter subterraneus	GSUB_04180	ORFNames=GSUB_04180 {ECO:0000313|EMBL:AJF05921.1};	A0A0B5FQQ2_9DELT	A0A0B5FQQ2	Carbonic anhydrase; Carbonate dehydratase	RecName: Full=Carbonic anhydrase {ECO:0000256|RuleBase:RU003956}; EC=4.2.1.1 {ECO:0000256|RuleBase:RU003956}; AltName: Full=Carbonate dehydratase {ECO:0000256|RuleBase:RU003956};	gsb:GSUB_04180	IPR001765;IPR015892;IPR036874	WP_040199333.1			PF00484	PS00704;PS00705
	TRINITY_DN40152_c0_g1_i2	tr|B7GD43|B7GD43_PHATC	Phaeodactylum tricornutum (strain CCAP 1055/1)	PHATRDRAFT_50149	ORFNames=PHATRDRAFT_50149 {ECO:0000313|EMBL:EEC43512.1};	B7GD43_PHATC	B7GD43	Amino acid transporter	RecName: Full=Amino acid transporter {ECO:0000256|RuleBase:RU361216};	pti:PHATRDRAFT_50149	IPR036458;IPR001991	XP_002185065.1			PF00375
	TRINITY_DN40152_c0_g1_i1	tr|B7GD43|B7GD43_PHATC	Phaeodactylum tricornutum (strain CCAP 1055/1)	PHATRDRAFT_50149	ORFNames=PHATRDRAFT_50149 {ECO:0000313|EMBL:EEC43512.1};	B7GD43_PHATC	B7GD43	Amino acid transporter	RecName: Full=Amino acid transporter {ECO:0000256|RuleBase:RU361216};	pti:PHATRDRAFT_50149	IPR036458;IPR001991	XP_002185065.1			PF00375
	TRINITY_DN40152_c0_g2_i1	tr|B7GD43|B7GD43_PHATC	Phaeodactylum tricornutum (strain CCAP 1055/1)	PHATRDRAFT_50149	ORFNames=PHATRDRAFT_50149 {ECO:0000313|EMBL:EEC43512.1};	B7GD43_PHATC	B7GD43	Amino acid transporter	RecName: Full=Amino acid transporter {ECO:0000256|RuleBase:RU361216};	pti:PHATRDRAFT_50149	IPR036458;IPR001991	XP_002185065.1			PF00375
	TRINITY_DN40140_c0_g1_i1	tr|A0A1U8IXN3|A0A1U8IXN3_GOSHI	Gossypium hirsutum (Upland cotton) (Gossypium mexicanum)	LOC107899912	Name=LOC107899912 {ECO:0000313|RefSeq:XP_016681138.1};	A0A1U8IXN3_GOSHI	A0A1U8IXN3	60S ribosomal protein L28-1-like	SubName: Full=60S ribosomal protein L28-1-like {ECO:0000313|RefSeq:XP_016681138.1};	ghi:107899912	IPR029004;IPR002672	XP_016681138.1			PF01778		PTHR10544
	TRINITY_DN81112_c0_g1_i1	tr|L1J7L6|L1J7L6_GUITH	Guillardia theta CCMP2712	GUITHDRAFT_109640	ORFNames=GUITHDRAFT_109640 {ECO:0000313|EMBL:EKX44521.1};	L1J7L6_GUITH	L1J7L6	Uncharacterized protein	SubName: Full=Uncharacterized protein {ECO:0000313|EMBL:EKX44521.1, ECO:0000313|EnsemblProtists:EKX44521};	gtt:GUITHDRAFT_109640	IPR008925;IPR020751;IPR004527;IPR000924;IPR020061;IPR020058;IPR012340;IPR014729;IPR002547	XP_005831501.1			PF00749;PF01588	PS50886		TIGR00464
	TRINITY_DN81112_c0_g1_i2	tr|L1J7L6|L1J7L6_GUITH	Guillardia theta CCMP2712	GUITHDRAFT_109640	ORFNames=GUITHDRAFT_109640 {ECO:0000313|EMBL:EKX44521.1};	L1J7L6_GUITH	L1J7L6	Uncharacterized protein	SubName: Full=Uncharacterized protein {ECO:0000313|EMBL:EKX44521.1, ECO:0000313|EnsemblProtists:EKX44521};	gtt:GUITHDRAFT_109640	IPR008925;IPR020751;IPR004527;IPR000924;IPR020061;IPR020058;IPR012340;IPR014729;IPR002547	XP_005831501.1			PF00749;PF01588	PS50886		TIGR00464
	TRINITY_DN14723_c0_g1_i1	tr|I1IDH6|I1IDH6_BRADI	Brachypodium distachyon (Purple false brome) (Trachynia distachya)	LOC100831040 BRADI_3g54177	Name=LOC100831040 {ECO:0000313|EnsemblPlants:BRADI3G54177.1}; ORFNames=BRADI_3g54177 {ECO:0000313|EMBL:KQK01162.1};	I1IDH6_BRADI	I1IDH6	Plasma membrane ATPase	RecName: Full=Plasma membrane ATPase {ECO:0000256|RuleBase:RU362083}; EC=3.6.3.6 {ECO:0000256|RuleBase:RU362083};	bdi:100831040	IPR004014;IPR023299;IPR018303;IPR023298;IPR008250;IPR036412;IPR006534;IPR001757	XP_003570306.1	KOG0205;COG0474	EOG093602AD	PF00690	PS00154		TIGR01647;TIGR01494
	TRINITY_DN14784_c0_g1_i8	sp|P0CD58|NU2C1_MAIZE	Zea mays (Maize)	ndhB1 ndh2-A	Name=ndhB1 {ECO:0000255|HAMAP-Rule:MF_00445}; Synonyms=ndh2-A;	NU2C1_MAIZE	P0CD58	NAD(P)H-quinone oxidoreductase subunit 2 A, chloroplastic; NAD(P)H dehydrogenase, subunit 2 A; NADH-plastoquinone oxidoreductase subunit 2 A	RecName: Full=NAD(P)H-quinone oxidoreductase subunit 2 A, chloroplastic {ECO:0000255|HAMAP-Rule:MF_00445}; EC=1.6.5.- {ECO:0000255|HAMAP-Rule:MF_00445}; AltName: Full=NAD(P)H dehydrogenase, subunit 2 A {ECO:0000255|HAMAP-Rule:MF_00445}; AltName: Full=NADH-plastoquinone oxidoreductase subunit 2 A {ECO:0000255|HAMAP-Rule:MF_00445};	zma:845180;zma:845181	IPR010096;IPR001750	NP_043076.1;NP_043102.1	ENOG410IPMV;COG1007		PF00361			TIGR01770
	TRINITY_DN14784_c0_g1_i9	sp|P0CD58|NU2C1_MAIZE	Zea mays (Maize)	ndhB1 ndh2-A	Name=ndhB1 {ECO:0000255|HAMAP-Rule:MF_00445}; Synonyms=ndh2-A;	NU2C1_MAIZE	P0CD58	NAD(P)H-quinone oxidoreductase subunit 2 A, chloroplastic; NAD(P)H dehydrogenase, subunit 2 A; NADH-plastoquinone oxidoreductase subunit 2 A	RecName: Full=NAD(P)H-quinone oxidoreductase subunit 2 A, chloroplastic {ECO:0000255|HAMAP-Rule:MF_00445}; EC=1.6.5.- {ECO:0000255|HAMAP-Rule:MF_00445}; AltName: Full=NAD(P)H dehydrogenase, subunit 2 A {ECO:0000255|HAMAP-Rule:MF_00445}; AltName: Full=NADH-plastoquinone oxidoreductase subunit 2 A {ECO:0000255|HAMAP-Rule:MF_00445};	zma:845180;zma:845181	IPR010096;IPR001750	NP_043076.1;NP_043102.1	ENOG410IPMV;COG1007		PF00361			TIGR01770
	TRINITY_DN47724_c0_g2_i2	tr|I1HHI0|I1HHI0_BRADI	Brachypodium distachyon (Purple false brome) (Trachynia distachya)	LOC100824594 BRADI_2g19510	Name=LOC100824594 {ECO:0000313|EnsemblPlants:BRADI2G19510.1}; ORFNames=BRADI_2g19510 {ECO:0000313|EMBL:KQK05342.1};	I1HHI0_BRADI	I1HHI0	Uncharacterized protein	SubName: Full=Uncharacterized protein {ECO:0000313|EMBL:KQK05342.1, ECO:0000313|EnsemblPlants:BRADI2G19510.1};	bdi:100824594	IPR003674	XP_003568077.1	KOG2292;COG1287	EOG093603HW	PF02516
	TRINITY_DN47724_c0_g2_i1	tr|I1HHI0|I1HHI0_BRADI	Brachypodium distachyon (Purple false brome) (Trachynia distachya)	LOC100824594 BRADI_2g19510	Name=LOC100824594 {ECO:0000313|EnsemblPlants:BRADI2G19510.1}; ORFNames=BRADI_2g19510 {ECO:0000313|EMBL:KQK05342.1};	I1HHI0_BRADI	I1HHI0	Uncharacterized protein	SubName: Full=Uncharacterized protein {ECO:0000313|EMBL:KQK05342.1, ECO:0000313|EnsemblPlants:BRADI2G19510.1};	bdi:100824594	IPR003674	XP_003568077.1	KOG2292;COG1287	EOG093603HW	PF02516
	TRINITY_DN75263_c0_g1_i1	tr|B3TN50|B3TN50_BRADI	Brachypodium distachyon (Purple false brome) (Trachynia distachya)	psaB	Name=psaB {ECO:0000256|HAMAP-Rule:MF_00482, ECO:0000313|EMBL:ACF08639.1};	B3TN50_BRADI	B3TN50	Photosystem I P700 chlorophyll a apoprotein A2; PSI-B; PsaB	RecName: Full=Photosystem I P700 chlorophyll a apoprotein A2 {ECO:0000256|HAMAP-Rule:MF_00482}; EC=1.97.1.12 {ECO:0000256|HAMAP-Rule:MF_00482}; AltName: Full=PSI-B {ECO:0000256|HAMAP-Rule:MF_00482}; AltName: Full=PsaB {ECO:0000256|HAMAP-Rule:MF_00482};	bdi:6439870	IPR001280;IPR020586;IPR036408;IPR006244	YP_002000486.1			PF00223	PS00419		TIGR01336
	TRINITY_DN75295_c0_g1_i1	tr|A0A1S2XLS0|A0A1S2XLS0_CICAR	Cicer arietinum (Chickpea) (Garbanzo)	LOC101506916	Name=LOC101506916 {ECO:0000313|RefSeq:XP_004490613.1};	A0A1S2XLS0_CICAR	A0A1S2XLS0	asparagine synthetase, root [glutamine-hydrolyzing]	SubName: Full=asparagine synthetase, root [glutamine-hydrolyzing] {ECO:0000313|RefSeq:XP_004490613.1};	cam:101506916	IPR006426;IPR001962;IPR033738;IPR017932;IPR029055;IPR014729	XP_004490613.1			PF00733;PF13537	PS51278
	TRINITY_DN70196_c0_g1_i1	tr|I1H7H3|I1H7H3_BRADI	Brachypodium distachyon (Purple false brome) (Trachynia distachya)	LOC100842789 BRADI_1g68210	Name=LOC100842789 {ECO:0000313|EnsemblPlants:BRADI1G68210.1}; ORFNames=BRADI_1g68210 {ECO:0000313|EMBL:KQK22588.1};	I1H7H3_BRADI	I1H7H3	Uncharacterized protein	SubName: Full=Uncharacterized protein {ECO:0000313|EMBL:KQK22588.1, ECO:0000313|EnsemblPlants:BRADI1G68210.1};	bdi:100842789	IPR009686	XP_003558360.1	ENOG410IEUS;ENOG410ZEPM	EOG09360CF8	PF06911
	TRINITY_DN384_c0_g2_i1	tr|B3N2H3|B3N2H3_DROAN	Drosophila ananassae (Fruit fly)	Dana\GF20359 Dana_GF20359, GF20359	Name=Dana\GF20359 {ECO:0000313|EMBL:EDV44939.2}; ORFNames=Dana_GF20359 {ECO:0000313|EMBL:EDV44939.2}, GF20359 {ECO:0000313|FlyBase:FBgn0097366};	B3N2H3_DROAN	B3N2H3	Uncharacterized protein	SubName: Full=Uncharacterized protein {ECO:0000313|EMBL:EDV44939.2};	dan:Dana_GF20359	IPR009072;IPR005818;IPR007125;IPR000164;IPR036390	XP_001967758.2	KOG1745;COG2036		PF00125;PF00538	PS51504;PS00322;PS00959	PTHR11426
	TRINITY_DN313_c1_g1_i4	tr|I1HDW9|I1HDW9_BRADI	Brachypodium distachyon (Purple false brome) (Trachynia distachya)	LOC100824486 BRADI_2g08820	Name=LOC100824486 {ECO:0000313|EnsemblPlants:BRADI2G08820.1}; ORFNames=BRADI_2g08820 {ECO:0000313|EMBL:KQK03600.1};	I1HDW9_BRADI	I1HDW9	Uncharacterized protein	SubName: Full=Uncharacterized protein {ECO:0000313|EMBL:KQK03600.1, ECO:0000313|EnsemblPlants:BRADI2G08820.1};	bdi:100824486		XP_003566365.1;XP_010230695.1;XP_014755048.1;XP_014755049.1;XP_014755050.1;XP_014755051.1;XP_014755052.1;XP_014755053.1;XP_014755054.1;XP_014755055.1	ENOG410IZ66;ENOG410YRQH	EOG09360W3U
	TRINITY_DN349_c0_g1_i5	tr|I1IXU2|I1IXU2_BRADI	Brachypodium distachyon (Purple false brome) (Trachynia distachya)	LOC100839482 BRADI_5g10330	Name=LOC100839482 {ECO:0000313|EnsemblPlants:BRADI5G10330.2}; ORFNames=BRADI_5g10330 {ECO:0000313|EMBL:KQJ82662.1};	I1IXU2_BRADI	I1IXU2	Uncharacterized protein	SubName: Full=Uncharacterized protein {ECO:0000313|EMBL:KQJ82662.1, ECO:0000313|EnsemblPlants:BRADI5G10330.2};	bdi:100839482	IPR011545;IPR011709;IPR007502;IPR014001;IPR001650;IPR027417	XP_010239919.1	KOG0920;COG1643	EOG093600JW	PF00270;PF04408;PF00271;PF07717	PS51192;PS51194
	TRINITY_DN349_c0_g1_i4	tr|I1IXU2|I1IXU2_BRADI	Brachypodium distachyon (Purple false brome) (Trachynia distachya)	LOC100839482 BRADI_5g10330	Name=LOC100839482 {ECO:0000313|EnsemblPlants:BRADI5G10330.2}; ORFNames=BRADI_5g10330 {ECO:0000313|EMBL:KQJ82662.1};	I1IXU2_BRADI	I1IXU2	Uncharacterized protein	SubName: Full=Uncharacterized protein {ECO:0000313|EMBL:KQJ82662.1, ECO:0000313|EnsemblPlants:BRADI5G10330.2};	bdi:100839482	IPR011545;IPR011709;IPR007502;IPR014001;IPR001650;IPR027417	XP_010239919.1	KOG0920;COG1643	EOG093600JW	PF00270;PF04408;PF00271;PF07717	PS51192;PS51194
	TRINITY_DN349_c0_g1_i3	tr|I1IXU2|I1IXU2_BRADI	Brachypodium distachyon (Purple false brome) (Trachynia distachya)	LOC100839482 BRADI_5g10330	Name=LOC100839482 {ECO:0000313|EnsemblPlants:BRADI5G10330.2}; ORFNames=BRADI_5g10330 {ECO:0000313|EMBL:KQJ82662.1};	I1IXU2_BRADI	I1IXU2	Uncharacterized protein	SubName: Full=Uncharacterized protein {ECO:0000313|EMBL:KQJ82662.1, ECO:0000313|EnsemblPlants:BRADI5G10330.2};	bdi:100839482	IPR011545;IPR011709;IPR007502;IPR014001;IPR001650;IPR027417	XP_010239919.1	KOG0920;COG1643	EOG093600JW	PF00270;PF04408;PF00271;PF07717	PS51192;PS51194
	TRINITY_DN349_c0_g1_i7	tr|I1IXU2|I1IXU2_BRADI	Brachypodium distachyon (Purple false brome) (Trachynia distachya)	LOC100839482 BRADI_5g10330	Name=LOC100839482 {ECO:0000313|EnsemblPlants:BRADI5G10330.2}; ORFNames=BRADI_5g10330 {ECO:0000313|EMBL:KQJ82662.1};	I1IXU2_BRADI	I1IXU2	Uncharacterized protein	SubName: Full=Uncharacterized protein {ECO:0000313|EMBL:KQJ82662.1, ECO:0000313|EnsemblPlants:BRADI5G10330.2};	bdi:100839482	IPR011545;IPR011709;IPR007502;IPR014001;IPR001650;IPR027417	XP_010239919.1	KOG0920;COG1643	EOG093600JW	PF00270;PF04408;PF00271;PF07717	PS51192;PS51194
	TRINITY_DN349_c0_g1_i13	tr|I1IXU2|I1IXU2_BRADI	Brachypodium distachyon (Purple false brome) (Trachynia distachya)	LOC100839482 BRADI_5g10330	Name=LOC100839482 {ECO:0000313|EnsemblPlants:BRADI5G10330.2}; ORFNames=BRADI_5g10330 {ECO:0000313|EMBL:KQJ82662.1};	I1IXU2_BRADI	I1IXU2	Uncharacterized protein	SubName: Full=Uncharacterized protein {ECO:0000313|EMBL:KQJ82662.1, ECO:0000313|EnsemblPlants:BRADI5G10330.2};	bdi:100839482	IPR011545;IPR011709;IPR007502;IPR014001;IPR001650;IPR027417	XP_010239919.1	KOG0920;COG1643	EOG093600JW	PF00270;PF04408;PF00271;PF07717	PS51192;PS51194
	TRINITY_DN28604_c0_g1_i1	tr|A0A0S4KU29|A0A0S4KU29_9BACT	Candidatus Nitrospira inopinata	NITINOP_1691	ORFNames=NITINOP_1691 {ECO:0000313|EMBL:CUQ66666.1};	A0A0S4KU29_9BACT	A0A0S4KU29	Aminotransferase class-III (Modular protein)	SubName: Full=Aminotransferase class-III (Modular protein) {ECO:0000313|EMBL:CUQ66666.1};	nio:NITINOP_1691	IPR005814;IPR015424;IPR015421;IPR015422	WP_062484650.1			PF00202	PS00600
	TRINITY_DN63788_c0_g1_i3	tr|I1GL33|I1GL33_BRADI	Brachypodium distachyon (Purple false brome) (Trachynia distachya)	LOC100836738 BRADI_1g02310	Name=LOC100836738 {ECO:0000313|EnsemblPlants:BRADI1G02310.7}; ORFNames=BRADI_1g02310 {ECO:0000313|EMBL:KQK12231.1};	I1GL33_BRADI	I1GL33	Uncharacterized protein	SubName: Full=Uncharacterized protein {ECO:0000313|EMBL:KQK12231.1, ECO:0000313|EnsemblPlants:BRADI1G02310.7};	bdi:100836738	IPR006594	XP_003562726.1;XP_010236828.1	ENOG410IKR6;ENOG410Y1GN		PF16045	PS50896
	TRINITY_DN78696_c0_g1_i2	tr|G4ZM32|G4ZM32_PHYSP	Phytophthora sojae (strain P6497) (Soybean stem and root rot agent) (Phytophthora megasperma f. sp. glycines)	PHYSODRAFT_545525	ORFNames=PHYSODRAFT_545525 {ECO:0000313|EMBL:EGZ15999.1};	G4ZM32_PHYSP	G4ZM32	Uncharacterized protein	SubName: Full=Uncharacterized protein {ECO:0000313|EMBL:EGZ15999.1};	psoj:PHYSODRAFT_545525	IPR005146;IPR009061;IPR004531;IPR020825;IPR005147	XP_009529748.1			PF03483;PF03484	PS51483		TIGR00471
	TRINITY_DN78602_c1_g1_i2	tr|A0A067KW82|A0A067KW82_JATCU	Jatropha curcas (Barbados nut)	JCGZ_00960	ORFNames=JCGZ_00960 {ECO:0000313|EMBL:KDP39203.1};	A0A067KW82_JATCU	A0A067KW82	Uncharacterized protein	SubName: Full=Uncharacterized protein {ECO:0000313|EMBL:KDP39203.1};	jcu:105633027	IPR019956;IPR029071;IPR019954;IPR000626	XP_012070921.1			PF00240	PS00299;PS50053
	TRINITY_DN78697_c0_g1_i2	tr|R1CCR8|R1CCR8_EMIHU	Emiliania huxleyi CCMP1516	EMIHUDRAFT_75288	ORFNames=EMIHUDRAFT_75288 {ECO:0000313|EMBL:EOD20192.1};	R1CCR8_EMIHU	R1CCR8	Uncharacterized protein	SubName: Full=Uncharacterized protein {ECO:0000313|EMBL:EOD20192.1}; Flags: Fragment;	ehx:EMIHUDRAFT_75288	IPR001609;IPR010926;IPR027417	XP_005772621.1			PF00063;PF06017	PS51456;PS51757
	TRINITY_DN78697_c0_g1_i1	tr|R1CCR8|R1CCR8_EMIHU	Emiliania huxleyi CCMP1516	EMIHUDRAFT_75288	ORFNames=EMIHUDRAFT_75288 {ECO:0000313|EMBL:EOD20192.1};	R1CCR8_EMIHU	R1CCR8	Uncharacterized protein	SubName: Full=Uncharacterized protein {ECO:0000313|EMBL:EOD20192.1}; Flags: Fragment;	ehx:EMIHUDRAFT_75288	IPR001609;IPR010926;IPR027417	XP_005772621.1			PF00063;PF06017	PS51456;PS51757
	TRINITY_DN62263_c0_g3_i1	tr|C0QSQ1|C0QSQ1_PERMH	Persephonella marina (strain DSM 14350 / EX-H1)	PERMA_1937	OrderedLocusNames=PERMA_1937 {ECO:0000313|EMBL:ACO03284.1};	C0QSQ1_PERMH	C0QSQ1	Uncharacterized protein	SubName: Full=Uncharacterized protein {ECO:0000313|EMBL:ACO03284.1};	pmx:PERMA_1937			ENOG41077QI;ENOG410Z2VT	POG091H3H8X
	TRINITY_DN62234_c0_g2_i1	tr|I1J0N0|I1J0N0_BRADI	Brachypodium distachyon (Purple false brome) (Trachynia distachya)	BRADI_5g18520	ORFNames=BRADI_5g18520 {ECO:0000313|EMBL:KQJ84074.1};	I1J0N0_BRADI	I1J0N0	Uncharacterized protein	SubName: Full=Uncharacterized protein {ECO:0000313|EMBL:KQJ84074.1, ECO:0000313|EnsemblPlants:BRADI5G18520.2};	bdi:100834167	IPR014001;IPR001650;IPR027417;IPR000330	XP_010240268.1	KOG0389;ENOG410XNUT	EOG093602Y5	PF00271;PF00176	PS51192;PS51194
	TRINITY_DN62234_c0_g2_i3	tr|I1J0N0|I1J0N0_BRADI	Brachypodium distachyon (Purple false brome) (Trachynia distachya)	BRADI_5g18520	ORFNames=BRADI_5g18520 {ECO:0000313|EMBL:KQJ84074.1};	I1J0N0_BRADI	I1J0N0	Uncharacterized protein	SubName: Full=Uncharacterized protein {ECO:0000313|EMBL:KQJ84074.1, ECO:0000313|EnsemblPlants:BRADI5G18520.2};	bdi:100834167	IPR014001;IPR001650;IPR027417;IPR000330	XP_010240268.1	KOG0389;ENOG410XNUT	EOG093602Y5	PF00271;PF00176	PS51192;PS51194
	TRINITY_DN62225_c0_g1_i1	tr|D8TLB0|D8TLB0_VOLCA	Volvox carteri f. nagariensis	VOLCADRAFT_73112	ORFNames=VOLCADRAFT_73112 {ECO:0000313|EMBL:EFJ51705.1};	D8TLB0_VOLCA	D8TLB0	Uncharacterized protein	SubName: Full=Uncharacterized protein {ECO:0000313|EMBL:EFJ51705.1};	vcn:VOLCADRAFT_73112	IPR003594;IPR036890;IPR019805;IPR037196;IPR001404;IPR020575;IPR020568	XP_002947115.1			PF02518;PF00183	PS00298	PTHR11528
	TRINITY_DN62225_c1_g1_i1	tr|L8H6T6|L8H6T6_ACACA	Acanthamoeba castellanii str. Neff	ACA1_205660	ORFNames=ACA1_205660 {ECO:0000313|EMBL:ELR20448.1};	L8H6T6_ACACA	L8H6T6	Heat shock protein 82, putative	SubName: Full=Heat shock protein 82, putative {ECO:0000313|EMBL:ELR20448.1}; Flags: Fragment;	acan:ACA1_205660	IPR037196;IPR001404;IPR020568	XP_004367473.1			PF00183		PTHR11528
	TRINITY_DN62222_c0_g1_i1	tr|B9N0A1|B9N0A1_POPTR	Populus trichocarpa (Western balsam poplar) (Populus balsamifera subsp. trichocarpa)	POPTR_0015s06270g	ORFNames=POPTR_0015s06270g {ECO:0000313|EMBL:ERP52142.1};	B9N0A1_POPTR	B9N0A1	Uncharacterized protein	SubName: Full=Uncharacterized protein {ECO:0000313|EMBL:ERP52142.1};	pop:POPTR_0015s06270g	IPR011992;IPR018247;IPR002048	XP_006374345.1	KOG0027;COG5126	EOG09360Q20	PF13499	PS00018;PS50222
	TRINITY_DN62227_c0_g1_i6	tr|A0A0B4XQZ2|A0A0B4XQZ2_9GAMM	Alcanivorax pacificus W11-5	S7S_12230	ORFNames=S7S_12230 {ECO:0000313|EMBL:AJD48858.1};	A0A0B4XQZ2_9GAMM	A0A0B4XQZ2	Uncharacterized protein	SubName: Full=Uncharacterized protein {ECO:0000313|EMBL:AJD48858.1};	apac:S7S_12230	IPR025587				PF14261
	TRINITY_DN6838_c0_g1_i5	tr|K3XUQ5|K3XUQ5_SETIT	Setaria italica (Foxtail millet) (Panicum italicum)	LOC101782276 SETIT_005662mg	Name=LOC101782276 {ECO:0000313|EnsemblPlants:Si005662m}; ORFNames=SETIT_005662mg {ECO:0000313|EMBL:KQL09965.1};	K3XUQ5_SETIT	K3XUQ5	Uncharacterized protein	SubName: Full=Uncharacterized protein {ECO:0000313|EMBL:KQL09965.1, ECO:0000313|EnsemblPlants:Si005662m};	sita:101782276	IPR011989;IPR016024;IPR000225;IPR000008;IPR035892	XP_004965009.1	ENOG410ITMI;ENOG410ZTP2	EOG0936003Q	PF00168	PS50004
	TRINITY_DN6896_c0_g1_i2	tr|K3Z9R0|K3Z9R0_SETIT	Setaria italica (Foxtail millet) (Panicum italicum)	LOC101784135 SETIT_023281mg	Name=LOC101784135 {ECO:0000313|EnsemblPlants:Si023281m}; ORFNames=SETIT_023281mg {ECO:0000313|EMBL:KQL12721.1};	K3Z9R0_SETIT	K3Z9R0	Uncharacterized protein	SubName: Full=Uncharacterized protein {ECO:0000313|EMBL:KQL12721.1, ECO:0000313|EnsemblPlants:Si023281m};	sita:101784135	IPR016706;IPR015797	XP_004960022.1	KOG1689;ENOG410XS8Z	EOG09360MJ2	PF13869		PTHR13047
	TRINITY_DN6896_c0_g1_i1	tr|K3Z9R0|K3Z9R0_SETIT	Setaria italica (Foxtail millet) (Panicum italicum)	LOC101784135 SETIT_023281mg	Name=LOC101784135 {ECO:0000313|EnsemblPlants:Si023281m}; ORFNames=SETIT_023281mg {ECO:0000313|EMBL:KQL12721.1};	K3Z9R0_SETIT	K3Z9R0	Uncharacterized protein	SubName: Full=Uncharacterized protein {ECO:0000313|EMBL:KQL12721.1, ECO:0000313|EnsemblPlants:Si023281m};	sita:101784135	IPR016706;IPR015797	XP_004960022.1	KOG1689;ENOG410XS8Z	EOG09360MJ2	PF13869		PTHR13047
	TRINITY_DN6833_c0_g1_i8	tr|Q9FUS4|Q9FUS4_SETIT	Setaria italica (Foxtail millet) (Panicum italicum)	LOC101779009 SETIT_010361mg	Name=LOC101779009 {ECO:0000313|EnsemblPlants:Si010361m}; ORFNames=SETIT_010361mg {ECO:0000313|EMBL:KQK99585.1};	Q9FUS4_SETIT	Q9FUS4	Actin	SubName: Full=Actin {ECO:0000313|EMBL:AAG10041.1};	sita:101779009	IPR004000;IPR020902;IPR004001	NP_001267747.1;XP_012702630.1	KOG0676;COG5277	EOG09360BTG	PF00022	PS00406;PS00432;PS01132	PTHR11937
	TRINITY_DN6833_c0_g1_i5	tr|Q9FUS4|Q9FUS4_SETIT	Setaria italica (Foxtail millet) (Panicum italicum)	LOC101779009 SETIT_010361mg	Name=LOC101779009 {ECO:0000313|EnsemblPlants:Si010361m}; ORFNames=SETIT_010361mg {ECO:0000313|EMBL:KQK99585.1};	Q9FUS4_SETIT	Q9FUS4	Actin	SubName: Full=Actin {ECO:0000313|EMBL:AAG10041.1};	sita:101779009	IPR004000;IPR020902;IPR004001	NP_001267747.1;XP_012702630.1	KOG0676;COG5277	EOG09360BTG	PF00022	PS00406;PS00432;PS01132	PTHR11937
	TRINITY_DN6833_c0_g1_i3	tr|Q9FUS4|Q9FUS4_SETIT	Setaria italica (Foxtail millet) (Panicum italicum)	LOC101779009 SETIT_010361mg	Name=LOC101779009 {ECO:0000313|EnsemblPlants:Si010361m}; ORFNames=SETIT_010361mg {ECO:0000313|EMBL:KQK99585.1};	Q9FUS4_SETIT	Q9FUS4	Actin	SubName: Full=Actin {ECO:0000313|EMBL:AAG10041.1};	sita:101779009	IPR004000;IPR020902;IPR004001	NP_001267747.1;XP_012702630.1	KOG0676;COG5277	EOG09360BTG	PF00022	PS00406;PS00432;PS01132	PTHR11937
	TRINITY_DN6833_c0_g1_i7	tr|Q9FUS4|Q9FUS4_SETIT	Setaria italica (Foxtail millet) (Panicum italicum)	LOC101779009 SETIT_010361mg	Name=LOC101779009 {ECO:0000313|EnsemblPlants:Si010361m}; ORFNames=SETIT_010361mg {ECO:0000313|EMBL:KQK99585.1};	Q9FUS4_SETIT	Q9FUS4	Actin	SubName: Full=Actin {ECO:0000313|EMBL:AAG10041.1};	sita:101779009	IPR004000;IPR020902;IPR004001	NP_001267747.1;XP_012702630.1	KOG0676;COG5277	EOG09360BTG	PF00022	PS00406;PS00432;PS01132	PTHR11937
	TRINITY_DN6833_c0_g1_i6	tr|Q9FUS4|Q9FUS4_SETIT	Setaria italica (Foxtail millet) (Panicum italicum)	LOC101779009 SETIT_010361mg	Name=LOC101779009 {ECO:0000313|EnsemblPlants:Si010361m}; ORFNames=SETIT_010361mg {ECO:0000313|EMBL:KQK99585.1};	Q9FUS4_SETIT	Q9FUS4	Actin	SubName: Full=Actin {ECO:0000313|EMBL:AAG10041.1};	sita:101779009	IPR004000;IPR020902;IPR004001	NP_001267747.1;XP_012702630.1	KOG0676;COG5277	EOG09360BTG	PF00022	PS00406;PS00432;PS01132	PTHR11937
	TRINITY_DN6833_c0_g1_i2	tr|Q9FUS4|Q9FUS4_SETIT	Setaria italica (Foxtail millet) (Panicum italicum)	LOC101779009 SETIT_010361mg	Name=LOC101779009 {ECO:0000313|EnsemblPlants:Si010361m}; ORFNames=SETIT_010361mg {ECO:0000313|EMBL:KQK99585.1};	Q9FUS4_SETIT	Q9FUS4	Actin	SubName: Full=Actin {ECO:0000313|EMBL:AAG10041.1};	sita:101779009	IPR004000;IPR020902;IPR004001	NP_001267747.1;XP_012702630.1	KOG0676;COG5277	EOG09360BTG	PF00022	PS00406;PS00432;PS01132	PTHR11937
	TRINITY_DN6833_c2_g1_i1	tr|G7JAX4|G7JAX4_MEDTR	Medicago truncatula (Barrel medic) (Medicago tribuloides)	11431140 MTR_3g095530	Name=11431140 {ECO:0000313|EnsemblPlants:AES72796}; OrderedLocusNames=MTR_3g095530 {ECO:0000313|EMBL:AES72796.2};	G7JAX4_MEDTR	G7JAX4	Actin 2; Actin-related protein 4A	SubName: Full=Actin 2 {ECO:0000313|EMBL:AFB83350.1}; SubName: Full=Actin-related protein 4A {ECO:0000313|EMBL:AES72796.2};	mtr:MTR_3g095530	IPR004000;IPR020902;IPR004001	XP_003602545.2		EOG09360BTG	PF00022	PS00406;PS00432;PS01132	PTHR11937
	TRINITY_DN6899_c1_g2_i1	tr|C5XYW8|C5XYW8_SORBI	Sorghum bicolor (Sorghum) (Sorghum vulgare)	SORBI_3004G242200	ORFNames=SORBI_3004G242200 {ECO:0000313|EMBL:EES05546.1};	C5XYW8_SORBI	C5XYW8	Uncharacterized protein	SubName: Full=Uncharacterized protein {ECO:0000313|EMBL:EES05546.1};	sbi:8075725	IPR006043	XP_002452570.1	KOG1292;COG2233	EOG093605WR	PF00860
	TRINITY_DN51665_c0_g1_i1	sp|P23956|VATL_BOVIN	Bos taurus (Bovine)	ATP6V0C ATP6C, ATP6L	Name=ATP6V0C; Synonyms=ATP6C, ATP6L;	VATL_BOVIN	P23956	V-type proton ATPase 16 kDa proteolipid subunit; V-ATPase 16 kDa proteolipid subunit; Vacuolar proton pump 16 kDa proteolipid subunit	RecName: Full=V-type proton ATPase 16 kDa proteolipid subunit; Short=V-ATPase 16 kDa proteolipid subunit; AltName: Full=Vacuolar proton pump 16 kDa proteolipid subunit;	bta:550622	IPR002379;IPR000245;IPR011555;IPR035921	NP_001017954.1	KOG0232;COG0636	EOG091G0U1Y	PF00137			TIGR01100
	TRINITY_DN51650_c0_g1_i6	tr|I1GL13|I1GL13_BRADI	Brachypodium distachyon (Purple false brome) (Trachynia distachya)	LOC100828666 BRADI_1g02170	Name=LOC100828666 {ECO:0000313|EnsemblPlants:BRADI1G02170.1}; ORFNames=BRADI_1g02170 {ECO:0000313|EMBL:KQK12206.1};	I1GL13_BRADI	I1GL13	Uncharacterized protein	SubName: Full=Uncharacterized protein {ECO:0000313|EMBL:KQK12206.1, ECO:0000313|EnsemblPlants:BRADI1G02170.1};	bdi:100828666	IPR001107;IPR036013;IPR000163	XP_003562616.1	KOG3090;COG0330	EOG09360JXQ	PF01145		PTHR23222
	TRINITY_DN51650_c0_g1_i9	tr|I1GL13|I1GL13_BRADI	Brachypodium distachyon (Purple false brome) (Trachynia distachya)	LOC100828666 BRADI_1g02170	Name=LOC100828666 {ECO:0000313|EnsemblPlants:BRADI1G02170.1}; ORFNames=BRADI_1g02170 {ECO:0000313|EMBL:KQK12206.1};	I1GL13_BRADI	I1GL13	Uncharacterized protein	SubName: Full=Uncharacterized protein {ECO:0000313|EMBL:KQK12206.1, ECO:0000313|EnsemblPlants:BRADI1G02170.1};	bdi:100828666	IPR001107;IPR036013;IPR000163	XP_003562616.1	KOG3090;COG0330	EOG09360JXQ	PF01145		PTHR23222
	TRINITY_DN51650_c0_g1_i1	tr|I1GL13|I1GL13_BRADI	Brachypodium distachyon (Purple false brome) (Trachynia distachya)	LOC100828666 BRADI_1g02170	Name=LOC100828666 {ECO:0000313|EnsemblPlants:BRADI1G02170.1}; ORFNames=BRADI_1g02170 {ECO:0000313|EMBL:KQK12206.1};	I1GL13_BRADI	I1GL13	Uncharacterized protein	SubName: Full=Uncharacterized protein {ECO:0000313|EMBL:KQK12206.1, ECO:0000313|EnsemblPlants:BRADI1G02170.1};	bdi:100828666	IPR001107;IPR036013;IPR000163	XP_003562616.1	KOG3090;COG0330	EOG09360JXQ	PF01145		PTHR23222
	TRINITY_DN35170_c0_g1_i3	tr|A0A0Q3J7T6|A0A0Q3J7T6_BRADI	Brachypodium distachyon (Purple false brome) (Trachynia distachya)	BRADI_1g13180	ORFNames=BRADI_1g13180 {ECO:0000313|EMBL:KQK13891.1};	A0A0Q3J7T6_BRADI	A0A0Q3J7T6	Uncharacterized protein	SubName: Full=Uncharacterized protein {ECO:0000313|EMBL:KQK13891.1};	bdi:100831001	IPR014891;IPR025829;IPR001878;IPR036875;IPR013083	XP_003561576.1			PF08783;PF13696	PS51282;PS50158
	TRINITY_DN35126_c1_g1_i7	tr|A0A1U8LKZ2|A0A1U8LKZ2_GOSHI	Gossypium hirsutum (Upland cotton) (Gossypium mexicanum)	LOC107927290	Name=LOC107927290 {ECO:0000313|RefSeq:XP_016713844.1};	A0A1U8LKZ2_GOSHI	A0A1U8LKZ2	translationally-controlled tumor protein homolog	SubName: Full=translationally-controlled tumor protein homolog {ECO:0000313|RefSeq:XP_016713844.1};	ghi:107927290	IPR011057;IPR034737;IPR018103;IPR018105	XP_016713844.1			PF00838	PS01002;PS01003;PS51797	PTHR11991
	TRINITY_DN35126_c1_g1_i14	tr|A0A1U8LKZ2|A0A1U8LKZ2_GOSHI	Gossypium hirsutum (Upland cotton) (Gossypium mexicanum)	LOC107927290	Name=LOC107927290 {ECO:0000313|RefSeq:XP_016713844.1};	A0A1U8LKZ2_GOSHI	A0A1U8LKZ2	translationally-controlled tumor protein homolog	SubName: Full=translationally-controlled tumor protein homolog {ECO:0000313|RefSeq:XP_016713844.1};	ghi:107927290	IPR011057;IPR034737;IPR018103;IPR018105	XP_016713844.1			PF00838	PS01002;PS01003;PS51797	PTHR11991
	TRINITY_DN35126_c1_g1_i9	tr|A0A1U8LKZ2|A0A1U8LKZ2_GOSHI	Gossypium hirsutum (Upland cotton) (Gossypium mexicanum)	LOC107927290	Name=LOC107927290 {ECO:0000313|RefSeq:XP_016713844.1};	A0A1U8LKZ2_GOSHI	A0A1U8LKZ2	translationally-controlled tumor protein homolog	SubName: Full=translationally-controlled tumor protein homolog {ECO:0000313|RefSeq:XP_016713844.1};	ghi:107927290	IPR011057;IPR034737;IPR018103;IPR018105	XP_016713844.1			PF00838	PS01002;PS01003;PS51797	PTHR11991
	TRINITY_DN35126_c1_g1_i12	tr|A0A1U8LKZ2|A0A1U8LKZ2_GOSHI	Gossypium hirsutum (Upland cotton) (Gossypium mexicanum)	LOC107927290	Name=LOC107927290 {ECO:0000313|RefSeq:XP_016713844.1};	A0A1U8LKZ2_GOSHI	A0A1U8LKZ2	translationally-controlled tumor protein homolog	SubName: Full=translationally-controlled tumor protein homolog {ECO:0000313|RefSeq:XP_016713844.1};	ghi:107927290	IPR011057;IPR034737;IPR018103;IPR018105	XP_016713844.1			PF00838	PS01002;PS01003;PS51797	PTHR11991
	TRINITY_DN35126_c1_g2_i1	tr|I1H2P4|I1H2P4_BRADI	Brachypodium distachyon (Purple false brome) (Trachynia distachya)	LOC100832679 BRADI_1g54200	Name=LOC100832679 {ECO:0000313|EnsemblPlants:BRADI1G54200.1}; ORFNames=BRADI_1g54200 {ECO:0000313|EMBL:KQK20386.1};	I1H2P4_BRADI	I1H2P4	Dolichyl-diphosphooligosaccharide--protein glycosyltransferase 48 kDa subunit; Oligosaccharyl transferase 48 kDa subunit	RecName: Full=Dolichyl-diphosphooligosaccharide--protein glycosyltransferase 48 kDa subunit {ECO:0000256|RuleBase:RU361142}; Short=Oligosaccharyl transferase 48 kDa subunit {ECO:0000256|RuleBase:RU361142}; EC=2.4.99.18 {ECO:0000256|RuleBase:RU361142};	bdi:100832679	IPR005013	XP_003557393.1	KOG2754;ENOG410XSF3	EOG09360E0E	PF03345		PTHR10830
	TRINITY_DN35128_c0_g1_i1	tr|B9HJ03|B9HJ03_POPTR	Populus trichocarpa (Western balsam poplar) (Populus balsamifera subsp. trichocarpa)	POPTR_0008s11670g	ORFNames=POPTR_0008s11670g {ECO:0000313|EMBL:EEE89751.2};	B9HJ03_POPTR	B9HJ03	Uncharacterized protein	SubName: Full=Uncharacterized protein {ECO:0000313|EMBL:EEE89751.2};	pop:POPTR_0008s11670g	IPR001727	XP_002312384.2	KOG2881;COG2119	EOG09360NWW	PF01169		PTHR12608
	TRINITY_DN70096_c0_g1_i1	tr|I1GWD3|I1GWD3_BRADI	Brachypodium distachyon (Purple false brome) (Trachynia distachya)	LOC100834262 BRADI_1g33280	Name=LOC100834262 {ECO:0000313|EnsemblPlants:BRADI1G33280.1}; ORFNames=BRADI_1g33280 {ECO:0000313|EMBL:KQK17254.1};	I1GWD3_BRADI	I1GWD3	Uncharacterized protein	SubName: Full=Uncharacterized protein {ECO:0000313|EMBL:KQK17254.1, ECO:0000313|EnsemblPlants:BRADI1G33280.1};	bdi:100834262	IPR024709;IPR019378	XP_003560475.3	ENOG410IJN0;ENOG410ZXCE	EOG093605Z9	PF10250
	TRINITY_DN70020_c0_g4_i1	tr|G7JVL6|G7JVL6_MEDTR	Medicago truncatula (Barrel medic) (Medicago tribuloides)	11421757 MTR_4g006070	Name=11421757 {ECO:0000313|EnsemblPlants:AES86353}; OrderedLocusNames=MTR_4g006070 {ECO:0000313|EMBL:AES86353.1};	G7JVL6_MEDTR	G7JVL6	Uncharacterized protein	SubName: Full=Uncharacterized protein {ECO:0000313|EMBL:AES86353.1, ECO:0000313|EnsemblPlants:AES86353};	mtr:MTR_4g006070		XP_003604156.1		EOG09361C7F
	TRINITY_DN70085_c1_g1_i2	tr|K3YPX6|K3YPX6_SETIT	Setaria italica (Foxtail millet) (Panicum italicum)	LOC101773155 SETIT_016318mg	Name=LOC101773155 {ECO:0000313|EnsemblPlants:Si016318m}; ORFNames=SETIT_016318mg {ECO:0000313|EMBL:KQL32208.1};	K3YPX6_SETIT	K3YPX6	Uncharacterized protein	SubName: Full=Uncharacterized protein {ECO:0000313|EMBL:KQL32208.1, ECO:0000313|EnsemblPlants:Si016318m};	sita:101773155	IPR011545;IPR014001;IPR001650;IPR027417;IPR014014	XP_004954462.1	KOG0342;COG0513	EOG0936011H	PF00270;PF00271	PS51192;PS51194;PS51195
	TRINITY_DN14275_c0_g1_i2	tr|G4YW46|G4YW46_PHYSP	Phytophthora sojae (strain P6497) (Soybean stem and root rot agent) (Phytophthora megasperma f. sp. glycines)	PHYSODRAFT_485614	ORFNames=PHYSODRAFT_485614 {ECO:0000313|EMBL:EGZ24428.1};	G4YW46_PHYSP	G4YW46	Uncharacterized protein	SubName: Full=Uncharacterized protein {ECO:0000313|EMBL:EGZ24428.1};	psoj:PHYSODRAFT_485614	IPR018181;IPR029048;IPR029047;IPR013126	XP_009519716.1			PF00012	PS00297;PS00329;PS01036
	TRINITY_DN8911_c0_g1_i7	tr|A0A059AD74|A0A059AD74_EUCGR	Eucalyptus grandis (Flooded gum)	EUGRSUZ_J00886	ORFNames=EUGRSUZ_J00886 {ECO:0000313|EMBL:KCW51335.1};	A0A059AD74_EUCGR	A0A059AD74	Uncharacterized protein	SubName: Full=Uncharacterized protein {ECO:0000313|EMBL:KCW51335.1};	egr:104421621		XP_018719710.1
	TRINITY_DN8961_c1_g1_i2	sp|Q2QM55|ODPB3_ORYSJ	Oryza sativa subsp. japonica (Rice)	Os12g0616900, LOC_Os12g42230	OrderedLocusNames=Os12g0616900, LOC_Os12g42230;	ODPB3_ORYSJ	Q2QM55	Pyruvate dehydrogenase E1 component subunit beta-3, chloroplastic	RecName: Full=Pyruvate dehydrogenase E1 component subunit beta-3, chloroplastic; EC=1.2.4.1; Flags: Precursor;	osa:4352803	IPR029061;IPR009014;IPR005475;IPR033248	XP_015620613.1	KOG0524;COG0022	EOG09360DU7	PF02779;PF02780
	TRINITY_DN8961_c1_g1_i1	sp|Q2QM55|ODPB3_ORYSJ	Oryza sativa subsp. japonica (Rice)	Os12g0616900, LOC_Os12g42230	OrderedLocusNames=Os12g0616900, LOC_Os12g42230;	ODPB3_ORYSJ	Q2QM55	Pyruvate dehydrogenase E1 component subunit beta-3, chloroplastic	RecName: Full=Pyruvate dehydrogenase E1 component subunit beta-3, chloroplastic; EC=1.2.4.1; Flags: Precursor;	osa:4352803	IPR029061;IPR009014;IPR005475;IPR033248	XP_015620613.1	KOG0524;COG0022	EOG09360DU7	PF02779;PF02780
	TRINITY_DN8961_c1_g1_i5	sp|Q2QM55|ODPB3_ORYSJ	Oryza sativa subsp. japonica (Rice)	Os12g0616900, LOC_Os12g42230	OrderedLocusNames=Os12g0616900, LOC_Os12g42230;	ODPB3_ORYSJ	Q2QM55	Pyruvate dehydrogenase E1 component subunit beta-3, chloroplastic	RecName: Full=Pyruvate dehydrogenase E1 component subunit beta-3, chloroplastic; EC=1.2.4.1; Flags: Precursor;	osa:4352803	IPR029061;IPR009014;IPR005475;IPR033248	XP_015620613.1	KOG0524;COG0022	EOG09360DU7	PF02779;PF02780
	TRINITY_DN8961_c1_g1_i4	sp|Q2QM55|ODPB3_ORYSJ	Oryza sativa subsp. japonica (Rice)	Os12g0616900, LOC_Os12g42230	OrderedLocusNames=Os12g0616900, LOC_Os12g42230;	ODPB3_ORYSJ	Q2QM55	Pyruvate dehydrogenase E1 component subunit beta-3, chloroplastic	RecName: Full=Pyruvate dehydrogenase E1 component subunit beta-3, chloroplastic; EC=1.2.4.1; Flags: Precursor;	osa:4352803	IPR029061;IPR009014;IPR005475;IPR033248	XP_015620613.1	KOG0524;COG0022	EOG09360DU7	PF02779;PF02780
	TRINITY_DN8961_c1_g1_i3	sp|Q2QM55|ODPB3_ORYSJ	Oryza sativa subsp. japonica (Rice)	Os12g0616900, LOC_Os12g42230	OrderedLocusNames=Os12g0616900, LOC_Os12g42230;	ODPB3_ORYSJ	Q2QM55	Pyruvate dehydrogenase E1 component subunit beta-3, chloroplastic	RecName: Full=Pyruvate dehydrogenase E1 component subunit beta-3, chloroplastic; EC=1.2.4.1; Flags: Precursor;	osa:4352803	IPR029061;IPR009014;IPR005475;IPR033248	XP_015620613.1	KOG0524;COG0022	EOG09360DU7	PF02779;PF02780
	TRINITY_DN8927_c0_g2_i1	tr|K4ABU9|K4ABU9_SETIT	Setaria italica (Foxtail millet) (Panicum italicum)	LOC101764582 SETIT_036356mg	Name=LOC101764582 {ECO:0000313|EnsemblPlants:Si036356m}; ORFNames=SETIT_036356mg {ECO:0000313|EMBL:KQK88853.1};	K4ABU9_SETIT	K4ABU9	Uncharacterized protein	SubName: Full=Uncharacterized protein {ECO:0000313|EMBL:KQK88853.1, ECO:0000313|EnsemblPlants:Si036356m};	sita:101764582	IPR035979;IPR000504;IPR034158;IPR034159	XP_004982966.1	KOG0131;ENOG410XPT4	EOG09360JEZ	PF00076	PS50102
	TRINITY_DN86055_c0_g1_i1	tr|L8GL12|L8GL12_ACACA	Acanthamoeba castellanii str. Neff	ACA1_244230	ORFNames=ACA1_244230 {ECO:0000313|EMBL:ELR13413.1};	L8GL12_ACACA	L8GL12	Cathepsin L, putative	SubName: Full=Cathepsin L, putative {ECO:0000313|EMBL:ELR13413.1};	acan:ACA1_244230	IPR025661;IPR000169;IPR025660;IPR013128;IPR000668;IPR013201	XP_004335426.1			PF08246;PF00112	PS00640;PS00139;PS00639	PTHR12411
	TRINITY_DN86035_c0_g1_i14	tr|K3Y180|K3Y180_SETIT	Setaria italica (Foxtail millet) (Panicum italicum)	LOC101769201 SETIT_007943mg	Name=LOC101769201 {ECO:0000313|EnsemblPlants:Si007943m}; ORFNames=SETIT_007943mg {ECO:0000313|EMBL:KQL10298.1};	K3Y180_SETIT	K3Y180	Peroxidase	RecName: Full=Peroxidase {ECO:0000256|RuleBase:RU362060, ECO:0000256|SAAS:SAAS00709852}; EC=1.11.1.7 {ECO:0000256|RuleBase:RU362060, ECO:0000256|SAAS:SAAS00709852};	sita:101769201	IPR010255;IPR002016;IPR000823;IPR019794;IPR019793;IPR033905	XP_014660601.1	ENOG410IHG7;ENOG410YA9R	EOG09360F1F	PF00141	PS00435;PS00436;PS50873
	TRINITY_DN86098_c0_g1_i1	tr|I1HV01|I1HV01_BRADI	Brachypodium distachyon (Purple false brome) (Trachynia distachya)	LOC100845777 BRADI_2g60120	Name=LOC100845777 {ECO:0000313|EnsemblPlants:BRADI2G60120.1}; ORFNames=BRADI_2g60120 {ECO:0000313|EMBL:KQK11417.1};	I1HV01_BRADI	I1HV01	Uncharacterized protein	SubName: Full=Uncharacterized protein {ECO:0000313|EMBL:KQK11417.1, ECO:0000313|EnsemblPlants:BRADI2G60120.1};	bdi:100845777	IPR011009;IPR000719;IPR017441;IPR008271	XP_003565026.1	KOG1187;COG0515	EOG093609F5	PF00069	PS00107;PS50011;PS00108
	TRINITY_DN86098_c0_g1_i2	tr|I1HV01|I1HV01_BRADI	Brachypodium distachyon (Purple false brome) (Trachynia distachya)	LOC100845777 BRADI_2g60120	Name=LOC100845777 {ECO:0000313|EnsemblPlants:BRADI2G60120.1}; ORFNames=BRADI_2g60120 {ECO:0000313|EMBL:KQK11417.1};	I1HV01_BRADI	I1HV01	Uncharacterized protein	SubName: Full=Uncharacterized protein {ECO:0000313|EMBL:KQK11417.1, ECO:0000313|EnsemblPlants:BRADI2G60120.1};	bdi:100845777	IPR011009;IPR000719;IPR017441;IPR008271	XP_003565026.1	KOG1187;COG0515	EOG093609F5	PF00069	PS00107;PS50011;PS00108
	TRINITY_DN86098_c0_g1_i3	tr|I1HV01|I1HV01_BRADI	Brachypodium distachyon (Purple false brome) (Trachynia distachya)	LOC100845777 BRADI_2g60120	Name=LOC100845777 {ECO:0000313|EnsemblPlants:BRADI2G60120.1}; ORFNames=BRADI_2g60120 {ECO:0000313|EMBL:KQK11417.1};	I1HV01_BRADI	I1HV01	Uncharacterized protein	SubName: Full=Uncharacterized protein {ECO:0000313|EMBL:KQK11417.1, ECO:0000313|EnsemblPlants:BRADI2G60120.1};	bdi:100845777	IPR011009;IPR000719;IPR017441;IPR008271	XP_003565026.1	KOG1187;COG0515	EOG093609F5	PF00069	PS00107;PS50011;PS00108
	TRINITY_DN86096_c0_g1_i1	tr|A0A1S3E525|A0A1S3E525_CICAR	Cicer arietinum (Chickpea) (Garbanzo)	LOC101511540	Name=LOC101511540 {ECO:0000313|RefSeq:XP_004496435.1, ECO:0000313|RefSeq:XP_012570136.1};	A0A1S3E525_CICAR	A0A1S3E525	protein GIGANTEA isoform X1	SubName: Full=protein GIGANTEA isoform X1 {ECO:0000313|RefSeq:XP_004496435.1, ECO:0000313|RefSeq:XP_012570136.1};	cam:101511540	IPR011989;IPR026211	XP_004496435.1;XP_012570136.1					PTHR36319
	TRINITY_DN86091_c0_g1_i1	tr|A0A067BQC1|A0A067BQC1_SAPPC	Saprolegnia parasitica (strain CBS 223.65)	SPRG_14335	ORFNames=SPRG_14335 {ECO:0000313|EMBL:KDO20463.1};	A0A067BQC1_SAPPC	A0A067BQC1	Uncharacterized protein	SubName: Full=Uncharacterized protein {ECO:0000313|EMBL:KDO20463.1};	spar:SPRG_14335	IPR034616;IPR001017;IPR029061	XP_012208853.1			PF00676		PTHR43380:SF1
	TRINITY_DN86094_c0_g1_i1	tr|G4YXF0|G4YXF0_PHYSP	Phytophthora sojae (strain P6497) (Soybean stem and root rot agent) (Phytophthora megasperma f. sp. glycines)	PHYSODRAFT_483048	ORFNames=PHYSODRAFT_483048 {ECO:0000313|EMBL:EGZ26184.1};	G4YXF0_PHYSP	G4YXF0	Uncharacterized protein	SubName: Full=Uncharacterized protein {ECO:0000313|EMBL:EGZ26184.1};	psoj:PHYSODRAFT_483048	IPR001487;IPR036427;IPR031162;IPR013178;IPR036546;IPR035898;IPR015943;IPR011011;IPR001965;IPR013083;IPR000197;IPR000433	XP_009521472.1			PF00439;PF08214;PF16987;PF02135;PF00569	PS50014;PS51727;PS50134;PS01357;PS50135
	TRINITY_DN86068_c0_g1_i2	tr|A0A1S2XDV5|A0A1S2XDV5_CICAR	Cicer arietinum (Chickpea) (Garbanzo)	LOC101502062	Name=LOC101502062 {ECO:0000313|RefSeq:XP_004487811.1};	A0A1S2XDV5_CICAR	A0A1S2XDV5	protein LlR18B-like	SubName: Full=protein LlR18B-like {ECO:0000313|RefSeq:XP_004487811.1};	cam:101502062	IPR000916;IPR024949;IPR023393	XP_004487811.1			PF00407
	TRINITY_DN24756_c2_g1_i1	tr|V4LT25|V4LT25_EUTSA	Eutrema salsugineum (Saltwater cress) (Sisymbrium salsugineum)	EUTSA_v10014861mg	ORFNames=EUTSA_v10014861mg {ECO:0000313|EMBL:ESQ43003.1};	V4LT25_EUTSA	V4LT25	Histone H2A	RecName: Full=Histone H2A {ECO:0000256|RuleBase:RU003767};	eus:EUTSA_v10014861mg	IPR009072;IPR002119;IPR007125;IPR032454;IPR032458	XP_006401550.1			PF00125;PF16211	PS00046
	TRINITY_DN24789_c0_g1_i2	tr|I1GTX0|I1GTX0_BRADI	Brachypodium distachyon (Purple false brome) (Trachynia distachya)	LOC100845875 BRADI_1g26060	Name=LOC100845875 {ECO:0000313|EnsemblPlants:BRADI1G26060.1}; ORFNames=BRADI_1g26060 {ECO:0000313|EMBL:KQK15971.1};	I1GTX0_BRADI	I1GTX0	Patatin	RecName: Full=Patatin {ECO:0000256|RuleBase:RU361262}; EC=3.1.1.- {ECO:0000256|RuleBase:RU361262};	bdi:100845875	IPR016035;IPR011989;IPR016024;IPR000225;IPR001611;IPR003591;IPR032675;IPR002641	XP_003563015.1	KOG4231;ENOG410XQXJ	EOG093600QQ	PF00514;PF13855;PF01734	PS51635
	TRINITY_DN24789_c0_g1_i3	tr|I1GTX0|I1GTX0_BRADI	Brachypodium distachyon (Purple false brome) (Trachynia distachya)	LOC100845875 BRADI_1g26060	Name=LOC100845875 {ECO:0000313|EnsemblPlants:BRADI1G26060.1}; ORFNames=BRADI_1g26060 {ECO:0000313|EMBL:KQK15971.1};	I1GTX0_BRADI	I1GTX0	Patatin	RecName: Full=Patatin {ECO:0000256|RuleBase:RU361262}; EC=3.1.1.- {ECO:0000256|RuleBase:RU361262};	bdi:100845875	IPR016035;IPR011989;IPR016024;IPR000225;IPR001611;IPR003591;IPR032675;IPR002641	XP_003563015.1	KOG4231;ENOG410XQXJ	EOG093600QQ	PF00514;PF13855;PF01734	PS51635
	TRINITY_DN24757_c0_g1_i4	tr|K4A8G4|K4A8G4_SETIT	Setaria italica (Foxtail millet) (Panicum italicum)	LOC101775541 SETIT_035170mg	Name=LOC101775541 {ECO:0000313|EnsemblPlants:Si035170m}; ORFNames=SETIT_035170mg {ECO:0000313|EMBL:KQK92856.1};	K4A8G4_SETIT	K4A8G4	Uncharacterized protein	SubName: Full=Uncharacterized protein {ECO:0000313|EMBL:KQK92856.1, ECO:0000313|EnsemblPlants:Si035170m};	sita:101775541	IPR024977;IPR033010;IPR015943;IPR001680;IPR019775;IPR017986;IPR036322	XP_004985916.2;XP_012698532.1	ENOG410IMNX;COG2319	EOG093608QT	PF12894;PF00400	PS00678;PS50082;PS50294	PTHR19918
	TRINITY_DN24757_c0_g1_i8	tr|K4A8G4|K4A8G4_SETIT	Setaria italica (Foxtail millet) (Panicum italicum)	LOC101775541 SETIT_035170mg	Name=LOC101775541 {ECO:0000313|EnsemblPlants:Si035170m}; ORFNames=SETIT_035170mg {ECO:0000313|EMBL:KQK92856.1};	K4A8G4_SETIT	K4A8G4	Uncharacterized protein	SubName: Full=Uncharacterized protein {ECO:0000313|EMBL:KQK92856.1, ECO:0000313|EnsemblPlants:Si035170m};	sita:101775541	IPR024977;IPR033010;IPR015943;IPR001680;IPR019775;IPR017986;IPR036322	XP_004985916.2;XP_012698532.1	ENOG410IMNX;COG2319	EOG093608QT	PF12894;PF00400	PS00678;PS50082;PS50294	PTHR19918
	TRINITY_DN24797_c1_g1_i1	sp|Q38J50|FOMT2_WHEAT	Triticum aestivum (Wheat)	OMT2	Name=OMT2;	FOMT2_WHEAT	Q38J50	Tricetin 3',4',5'-O-trimethyltransferase; TaOMT2; Caffeic acid 3-O-methyltransferase; TaCM; Flavone O-methyltransferase 2	RecName: Full=Tricetin 3',4',5'-O-trimethyltransferase; Short=TaOMT2; EC=2.1.1.169; AltName: Full=Caffeic acid 3-O-methyltransferase; Short=TaCM; AltName: Full=Flavone O-methyltransferase 2;	ag:ABB03907	IPR016461;IPR001077;IPR012967;IPR029063;IPR036388;IPR036390				PF08100;PF00891	PS51683
	TRINITY_DN14615_c0_g3_i1	tr|Q5ZE83|Q5ZE83_ORYSJ	Oryza sativa subsp. japonica (Rice)	Os01g0116400 OsJ_00143, OSNPB_010116400, P0698G03.18	OrderedLocusNames=Os01g0116400 {ECO:0000313|EMBL:BAF03757.1}; ORFNames=OsJ_00143 {ECO:0000313|EMBL:EEE53764.1}, OSNPB_010116400 {ECO:0000313|EMBL:BAS70085.1}, P0698G03.18 {ECO:0000313|EMBL:BAD52508.1};	Q5ZE83_ORYSJ	Q5ZE83	Os01g0116400 protein; Putative rust resistance kinase Lr10; cDNA clone:J013046E24, full insert sequence	SubName: Full=Os01g0116400 protein {ECO:0000313|EMBL:BAF03757.1}; SubName: Full=Putative rust resistance kinase Lr10 {ECO:0000313|EMBL:BAD52508.1}; SubName: Full=cDNA clone:J013046E24, full insert sequence {ECO:0000313|EMBL:BAG89788.1};	osa:4326093	IPR011009;IPR000719;IPR017441;IPR008271	XP_015646869.1	KOG1187;COG0515	EOG093603BZ	PF00069	PS00107;PS50011;PS00108
	TRINITY_DN14627_c0_g1_i1	sp|Q6Z7B0|BIP1_ORYSJ	Oryza sativa subsp. japonica (Rice)	BIP1 BIP Os02g0115900, LOC_Os02g02410 OJ1442_E05.10, OsJ_05115, P0036E06.29	Name=BIP1 {ECO:0000303|PubMed:21223397}; Synonyms=BIP {ECO:0000303|PubMed:9177027}; OrderedLocusNames=Os02g0115900 {ECO:0000312|EMBL:BAF07589.1}, LOC_Os02g02410 {ECO:0000305}; ORFNames=OJ1442_E05.10 {ECO:0000312|EMBL:BAD07713.1}, OsJ_05115 {ECO:0000312|EMBL:EAZ21491.1}, P0036E06.29 {ECO:0000312|EMBL:BAD07938.1};	BIP1_ORYSJ	Q6Z7B0	Heat shock 70 kDa protein BIP1; Luminal-binding protein 1; OsBiP1	RecName: Full=Heat shock 70 kDa protein BIP1 {ECO:0000305}; AltName: Full=Luminal-binding protein 1 {ECO:0000305}; Short=OsBiP1 {ECO:0000303|PubMed:22050533}; Flags: Precursor;	osa:4328075	IPR018181;IPR029048;IPR029047;IPR013126	XP_015625618.1	KOG0100;COG0443	EOG093604JO	PF00012	PS00014;PS00297;PS00329;PS01036
	TRINITY_DN14609_c0_g1_i1	tr|I1HYG0|I1HYG0_BRADI	Brachypodium distachyon (Purple false brome) (Trachynia distachya)	LOC100827484 BRADI_3g07340	Name=LOC100827484 {ECO:0000313|EnsemblPlants:BRADI3G07340.1}; ORFNames=BRADI_3g07340 {ECO:0000313|EMBL:KQJ93898.1};	I1HYG0_BRADI	I1HYG0	Uncharacterized protein	SubName: Full=Uncharacterized protein {ECO:0000313|EMBL:KQJ93898.1, ECO:0000313|EnsemblPlants:BRADI3G07340.1};	bdi:100827484	IPR036047;IPR001810	XP_003571079.1	ENOG410JWMS;ENOG41104T9	EOG09360C4X
	TRINITY_DN14609_c0_g1_i2	tr|I1HYG0|I1HYG0_BRADI	Brachypodium distachyon (Purple false brome) (Trachynia distachya)	LOC100827484 BRADI_3g07340	Name=LOC100827484 {ECO:0000313|EnsemblPlants:BRADI3G07340.1}; ORFNames=BRADI_3g07340 {ECO:0000313|EMBL:KQJ93898.1};	I1HYG0_BRADI	I1HYG0	Uncharacterized protein	SubName: Full=Uncharacterized protein {ECO:0000313|EMBL:KQJ93898.1, ECO:0000313|EnsemblPlants:BRADI3G07340.1};	bdi:100827484	IPR036047;IPR001810	XP_003571079.1	ENOG410JWMS;ENOG41104T9	EOG09360C4X
	TRINITY_DN57410_c0_g1_i1	tr|U5FI79|U5FI79_POPTR	Populus trichocarpa (Western balsam poplar) (Populus balsamifera subsp. trichocarpa)	POPTR_0017s08680g	ORFNames=POPTR_0017s08680g {ECO:0000313|EMBL:ERP50893.1};	U5FI79_POPTR	U5FI79	Selenium binding family protein	SubName: Full=Selenium binding family protein {ECO:0000313|EMBL:ERP50893.1};	pop:POPTR_0017s08680g	IPR011042;IPR008826;IPR015943	XP_006373096.1	KOG0918;ENOG410XP4F	EOG093608BY	PF05694		PTHR23300
	TRINITY_DN57429_c0_g1_i1	tr|A0A1S2XDS5|A0A1S2XDS5_CICAR	Cicer arietinum (Chickpea) (Garbanzo)	LOC101515474	Name=LOC101515474 {ECO:0000313|RefSeq:XP_004487768.1};	A0A1S2XDS5_CICAR	A0A1S2XDS5	uncharacterized protein LOC101515474	SubName: Full=uncharacterized protein LOC101515474 {ECO:0000313|RefSeq:XP_004487768.1};	cam:101515474		XP_004487768.1
	TRINITY_DN76889_c0_g1_i1	tr|Q9ZP07|Q9ZP07_CICAR	Cicer arietinum (Chickpea) (Garbanzo)	LOC101499528	Name=LOC101499528 {ECO:0000313|RefSeq:XP_012568008.1};	Q9ZP07_CICAR	Q9ZP07	Ribulose bisphosphate carboxylase small chain	RecName: Full=Ribulose bisphosphate carboxylase small chain {ECO:0000256|RuleBase:RU003627}; EC=4.1.1.39 {ECO:0000256|RuleBase:RU003627};	cam:101499528	IPR024681;IPR000894;IPR024680;IPR036385	NP_001296613.1;XP_012568008.1			PF12338;PF00101
	TRINITY_DN76897_c0_g1_i2	tr|M2WSK6|M2WSK6_GALSU	Galdieria sulphuraria (Red alga)	Gasu_55220	ORFNames=Gasu_55220 {ECO:0000313|EMBL:EME26835.1};	M2WSK6_GALSU	M2WSK6	Bifunctional 6-phosphofructo-2-kinase / fructose-2,6-bisphosphatase	SubName: Full=Bifunctional 6-phosphofructo-2-kinase / fructose-2,6-bisphosphatase {ECO:0000313|EMBL:EME26835.1}; EC=2.7.1.105 {ECO:0000313|EMBL:EME26835.1}; EC=3.1.3.46 {ECO:0000313|EMBL:EME26835.1};	gsl:Gasu_55220	IPR003094;IPR013079;IPR013078;IPR029033;IPR027417;IPR001345	XP_005703355.1			PF01591;PF00300	PS00175	PTHR10606
	TRINITY_DN76821_c0_g1_i1	tr|I1GQV7|I1GQV7_BRADI	Brachypodium distachyon (Purple false brome) (Trachynia distachya)	LOC100838529 BRADI_1g16670	Name=LOC100838529 {ECO:0000313|EnsemblPlants:BRADI1G16670.1}; ORFNames=BRADI_1g16670 {ECO:0000313|EMBL:KQK14496.1};	I1GQV7_BRADI	I1GQV7	Uncharacterized protein	SubName: Full=Uncharacterized protein {ECO:0000313|EMBL:KQK14496.1, ECO:0000313|EnsemblPlants:BRADI1G16670.1};	bdi:100838529	IPR011009;IPR000719;IPR001245	XP_003559748.1	ENOG410JU5N;ENOG411076R	EOG093608AI	PF07714	PS50011
	TRINITY_DN76842_c0_g1_i1	sp|Q54GX7|ACT10_DICDI	Dictyostelium discoideum (Slime mold)	act10 DDB_G0289811	Name=act10; ORFNames=DDB_G0289811;	ACT10_DICDI	Q54GX7	Actin-10	RecName: Full=Actin-10;	ddi:DDB_G0289811	IPR004000;IPR020902;IPR004001	XP_636030.1	KOG0676;COG5277		PF00022	PS00406;PS00432;PS01132	PTHR11937
	TRINITY_DN76842_c1_g1_i4	sp|Q54GX7|ACT10_DICDI	Dictyostelium discoideum (Slime mold)	act10 DDB_G0289811	Name=act10; ORFNames=DDB_G0289811;	ACT10_DICDI	Q54GX7	Actin-10	RecName: Full=Actin-10;	ddi:DDB_G0289811	IPR004000;IPR020902;IPR004001	XP_636030.1	KOG0676;COG5277		PF00022	PS00406;PS00432;PS01132	PTHR11937
	TRINITY_DN76842_c1_g1_i3	sp|Q54GX7|ACT10_DICDI	Dictyostelium discoideum (Slime mold)	act10 DDB_G0289811	Name=act10; ORFNames=DDB_G0289811;	ACT10_DICDI	Q54GX7	Actin-10	RecName: Full=Actin-10;	ddi:DDB_G0289811	IPR004000;IPR020902;IPR004001	XP_636030.1	KOG0676;COG5277		PF00022	PS00406;PS00432;PS01132	PTHR11937
	TRINITY_DN72143_c0_g1_i2	tr|J3L3H7|J3L3H7_ORYBR	Oryza brachyantha (malo sina)	102713413	Name=102713413 {ECO:0000313|EnsemblPlants:OB01G37830.1};	J3L3H7_ORYBR	J3L3H7	Uncharacterized protein	SubName: Full=Uncharacterized protein {ECO:0000313|EnsemblPlants:OB01G37830.1};	obr:102713413	IPR029063	XP_006644622.1	KOG3010;ENOG4111IQH	EOG09360L3I
	TRINITY_DN72112_c0_g1_i8	tr|M2RFV0|M2RFV0_COCSN	Cochliobolus sativus (strain ND90Pr / ATCC 201652) (Common root rot and spot blotch fungus) (Bipolaris sorokiniana)	COCSADRAFT_307957	ORFNames=COCSADRAFT_307957 {ECO:0000313|EMBL:EMD65629.1};	M2RFV0_COCSN	M2RFV0	Uncharacterized protein	SubName: Full=Uncharacterized protein {ECO:0000313|EMBL:EMD65629.1};	bsc:COCSADRAFT_307957	IPR003594;IPR036890;IPR019805;IPR037196;IPR001404;IPR020575;IPR020568	XP_007698721.1		EOG092C1GW3	PF02518;PF00183	PS00298	PTHR11528
	TRINITY_DN72112_c0_g1_i12	tr|M2RFV0|M2RFV0_COCSN	Cochliobolus sativus (strain ND90Pr / ATCC 201652) (Common root rot and spot blotch fungus) (Bipolaris sorokiniana)	COCSADRAFT_307957	ORFNames=COCSADRAFT_307957 {ECO:0000313|EMBL:EMD65629.1};	M2RFV0_COCSN	M2RFV0	Uncharacterized protein	SubName: Full=Uncharacterized protein {ECO:0000313|EMBL:EMD65629.1};	bsc:COCSADRAFT_307957	IPR003594;IPR036890;IPR019805;IPR037196;IPR001404;IPR020575;IPR020568	XP_007698721.1		EOG092C1GW3	PF02518;PF00183	PS00298	PTHR11528
	TRINITY_DN72129_c0_g1_i3	tr|L8H0Y2|L8H0Y2_ACACA	Acanthamoeba castellanii str. Neff	ACA1_335920	ORFNames=ACA1_335920 {ECO:0000313|EMBL:ELR19129.1};	L8H0Y2_ACACA	L8H0Y2	Polyubiquitin, putative	SubName: Full=Polyubiquitin, putative {ECO:0000313|EMBL:ELR19129.1};	acan:ACA1_335920	IPR019956;IPR029071;IPR019954;IPR000626	XP_004341200.1			PF00240	PS00299;PS50053
	TRINITY_DN72129_c0_g1_i4	tr|L8H0Y2|L8H0Y2_ACACA	Acanthamoeba castellanii str. Neff	ACA1_335920	ORFNames=ACA1_335920 {ECO:0000313|EMBL:ELR19129.1};	L8H0Y2_ACACA	L8H0Y2	Polyubiquitin, putative	SubName: Full=Polyubiquitin, putative {ECO:0000313|EMBL:ELR19129.1};	acan:ACA1_335920	IPR019956;IPR029071;IPR019954;IPR000626	XP_004341200.1			PF00240	PS00299;PS50053
	TRINITY_DN72121_c0_g2_i1	tr|Q8S9E8|Q8S9E8_WHEAT	Triticum aestivum (Wheat)	CYP71C7v2	Name=CYP71C7v2 {ECO:0000313|EMBL:BAB87818.1};	Q8S9E8_WHEAT	Q8S9E8	P450	SubName: Full=P450 {ECO:0000313|EMBL:BAB87818.1, ECO:0000313|EnsemblPlants:TRIAE_CS42_5AS_TGACv1_392955_AA1266790.1};	ag:BAB87818	IPR001128;IPR017972;IPR002401;IPR036396				PF00067	PS00086
	TRINITY_DN72194_c0_g1_i5	tr|I1J2K2|I1J2K2_BRADI	Brachypodium distachyon (Purple false brome) (Trachynia distachya)	LOC100830691 BRADI_5g23910	Name=LOC100830691 {ECO:0000313|EnsemblPlants:BRADI5G23910.1}; ORFNames=BRADI_5g23910 {ECO:0000313|EMBL:KQJ84953.1};	I1J2K2_BRADI	I1J2K2	Uncharacterized protein	SubName: Full=Uncharacterized protein {ECO:0000313|EMBL:KQJ84953.1, ECO:0000313|EnsemblPlants:BRADI5G23910.1};	bdi:100830691	IPR000620	XP_003580681.1	KOG2765;COG0697	EOG09360F47	PF00892
	TRINITY_DN72391_c0_g1_i1	tr|A0A1E7EP83|A0A1E7EP83_9STRA	Fragilariopsis cylindrus CCMP1102	FRACYDRAFT_277781	ORFNames=FRACYDRAFT_277781 {ECO:0000313|EMBL:OEU07751.1};	A0A1E7EP83_9STRA	A0A1E7EP83	ATP-binding cassette transporter	SubName: Full=ATP-binding cassette transporter {ECO:0000313|EMBL:OEU07751.1};	fcy:FRACYDRAFT_277781	IPR003593;IPR011527;IPR036640;IPR003439;IPR017871;IPR027417				PF00664;PF00005	PS50929;PS00211;PS50893
	TRINITY_DN72391_c0_g1_i2	tr|A0A1E7EP83|A0A1E7EP83_9STRA	Fragilariopsis cylindrus CCMP1102	FRACYDRAFT_277781	ORFNames=FRACYDRAFT_277781 {ECO:0000313|EMBL:OEU07751.1};	A0A1E7EP83_9STRA	A0A1E7EP83	ATP-binding cassette transporter	SubName: Full=ATP-binding cassette transporter {ECO:0000313|EMBL:OEU07751.1};	fcy:FRACYDRAFT_277781	IPR003593;IPR011527;IPR036640;IPR003439;IPR017871;IPR027417				PF00664;PF00005	PS50929;PS00211;PS50893
	TRINITY_DN72391_c1_g1_i1	tr|A0A1E7EP83|A0A1E7EP83_9STRA	Fragilariopsis cylindrus CCMP1102	FRACYDRAFT_277781	ORFNames=FRACYDRAFT_277781 {ECO:0000313|EMBL:OEU07751.1};	A0A1E7EP83_9STRA	A0A1E7EP83	ATP-binding cassette transporter	SubName: Full=ATP-binding cassette transporter {ECO:0000313|EMBL:OEU07751.1};	fcy:FRACYDRAFT_277781	IPR003593;IPR011527;IPR036640;IPR003439;IPR017871;IPR027417				PF00664;PF00005	PS50929;PS00211;PS50893
	TRINITY_DN99804_c0_g1_i1	tr|K3YI78|K3YI78_SETIT	Setaria italica (Foxtail millet) (Panicum italicum)	LOC101782061 SETIT_013947mg	Name=LOC101782061 {ECO:0000313|EnsemblPlants:Si013947m}; ORFNames=SETIT_013947mg {ECO:0000313|EMBL:KQL02977.1};	K3YI78_SETIT	K3YI78	Uncharacterized protein	SubName: Full=Uncharacterized protein {ECO:0000313|EMBL:KQL02977.1, ECO:0000313|EnsemblPlants:Si013947m};	sita:101782061	IPR007369;IPR006639	XP_004974212.1	KOG2443;ENOG410XTES	EOG09360FBJ	PF04258		PTHR12174
	TRINITY_DN99886_c0_g1_i2	sp|Q10LI1|SRFP1_ORYSJ	Oryza sativa subsp. japonica (Rice)	SRFP1 Os03g0348900, LOC_Os03g22680 OsJ_10832	Name=SRFP1 {ECO:0000303|PubMed:25667045}; OrderedLocusNames=Os03g0348900 {ECO:0000312|EMBL:BAF12019.1}, LOC_Os03g22680 {ECO:0000312|EMBL:ABF95919.1}; ORFNames=OsJ_10832 {ECO:0000312|EMBL:EEE59054.1};	SRFP1_ORYSJ	Q10LI1	E3 ubiquitin-protein ligase SRFP1; OsSRFP1	RecName: Full=E3 ubiquitin-protein ligase SRFP1 {ECO:0000303|PubMed:25667045}; Short=OsSRFP1 {ECO:0000303|PubMed:25667045}; EC=2.3.2.27 {ECO:0000269|PubMed:25667045};	osa:4332833	IPR008913;IPR037274;IPR017921;IPR037275;IPR001841;IPR013083	XP_015628865.1	KOG1940;ENOG410XXHF	EOG09360GA7	PF05495;PF13639	PS51266;PS51270;PS50089
	TRINITY_DN99896_c0_g1_i3	tr|I1HMM0|I1HMM0_BRADI	Brachypodium distachyon (Purple false brome) (Trachynia distachya)	LOC100834314 BRADI_2g38140	Name=LOC100834314 {ECO:0000313|EnsemblPlants:BRADI2G38140.1}; ORFNames=BRADI_2g38140 {ECO:0000313|EMBL:KQK07870.1};	I1HMM0_BRADI	I1HMM0	Uncharacterized protein	SubName: Full=Uncharacterized protein {ECO:0000313|EMBL:KQK07870.1, ECO:0000313|EnsemblPlants:BRADI2G38140.1};	bdi:100834314		XP_003569048.1	ENOG410IXUP;ENOG410YIHB	EOG09360P1M
	TRINITY_DN99896_c0_g2_i1	tr|I1HMM0|I1HMM0_BRADI	Brachypodium distachyon (Purple false brome) (Trachynia distachya)	LOC100834314 BRADI_2g38140	Name=LOC100834314 {ECO:0000313|EnsemblPlants:BRADI2G38140.1}; ORFNames=BRADI_2g38140 {ECO:0000313|EMBL:KQK07870.1};	I1HMM0_BRADI	I1HMM0	Uncharacterized protein	SubName: Full=Uncharacterized protein {ECO:0000313|EMBL:KQK07870.1, ECO:0000313|EnsemblPlants:BRADI2G38140.1};	bdi:100834314		XP_003569048.1	ENOG410IXUP;ENOG410YIHB	EOG09360P1M
	TRINITY_DN99835_c0_g1_i2	tr|M2W8U1|M2W8U1_GALSU	Galdieria sulphuraria (Red alga)	Gasu_06940	ORFNames=Gasu_06940 {ECO:0000313|EMBL:EME32286.1};	M2W8U1_GALSU	M2W8U1	60S ribosomal protein L23Ae	SubName: Full=60S ribosomal protein L23Ae {ECO:0000313|EMBL:EME32286.1};	gsl:Gasu_06940	IPR012678;IPR001014;IPR005633;IPR013025	XP_005708806.1			PF00276;PF03939	PS00050
	TRINITY_DN99835_c0_g1_i1	tr|M2W8U1|M2W8U1_GALSU	Galdieria sulphuraria (Red alga)	Gasu_06940	ORFNames=Gasu_06940 {ECO:0000313|EMBL:EME32286.1};	M2W8U1_GALSU	M2W8U1	60S ribosomal protein L23Ae	SubName: Full=60S ribosomal protein L23Ae {ECO:0000313|EMBL:EME32286.1};	gsl:Gasu_06940	IPR012678;IPR001014;IPR005633;IPR013025	XP_005708806.1			PF00276;PF03939	PS00050
	TRINITY_DN36526_c0_g1_i2	tr|C5YH07|C5YH07_SORBI	Sorghum bicolor (Sorghum) (Sorghum vulgare)	SORBI_3007G046200	ORFNames=SORBI_3007G046200 {ECO:0000313|EMBL:EES14574.1};	C5YH07_SORBI	C5YH07	Uncharacterized protein	SubName: Full=Uncharacterized protein {ECO:0000313|EMBL:EES14574.1};	sbi:8069621	IPR007133	XP_002445079.1	KOG2478;ENOG410YZXE	EOG09360BDJ	PF03985		PTHR23188
	TRINITY_DN96259_c0_g1_i2	tr|A9UU68|A9UU68_MONBE	Monosiga brevicollis (Choanoflagellate)	15180	ORFNames=15180 {ECO:0000313|EMBL:EDQ91615.1};	A9UU68_MONBE	A9UU68	Predicted protein	SubName: Full=Predicted protein {ECO:0000313|EMBL:EDQ91615.1}; Flags: Fragment;	mbr:MONBRDRAFT_15180	IPR000569;IPR035983;IPR001202;IPR036020	XP_001744037.1	KOG0940;COG5021		PF00632;PF00397	PS50237;PS01159;PS50020
	TRINITY_DN96268_c0_g1_i1	tr|D0MUR2|D0MUR2_PHYIT	Phytophthora infestans (strain T30-4) (Potato late blight fungus)	PITG_02045, PITG_02046	ORFNames=PITG_02045 {ECO:0000313|EMBL:EEY61709.1}, PITG_02046 {ECO:0000313|EMBL:EEY61710.1};	D0MUR2_PHYIT	D0MUR2	V-type proton ATPase proteolipid subunit	RecName: Full=V-type proton ATPase proteolipid subunit {ECO:0000256|RuleBase:RU363060};	pif:PITG_02045;pif:PITG_02046	IPR002379;IPR000245;IPR011555;IPR035921	XP_002908626.1;XP_002908627.1			PF00137			TIGR01100
	TRINITY_DN27101_c0_g1_i2	tr|I1GSE5|I1GSE5_BRADI	Brachypodium distachyon (Purple false brome) (Trachynia distachya)	LOC100843408 BRADI_1g21560	Name=LOC100843408 {ECO:0000313|EnsemblPlants:BRADI1G21560.1}; ORFNames=BRADI_1g21560 {ECO:0000313|EMBL:KQK15271.1};	I1GSE5_BRADI	I1GSE5	Uncharacterized protein	SubName: Full=Uncharacterized protein {ECO:0000313|EMBL:KQK15271.1, ECO:0000313|EnsemblPlants:BRADI1G21560.1};	bdi:100843408	IPR002035;IPR036465	XP_010235662.1	ENOG410IK1P;COG2304	EOG093602XF	PF13768	PS50234
	TRINITY_DN27101_c0_g1_i1	tr|I1GSE5|I1GSE5_BRADI	Brachypodium distachyon (Purple false brome) (Trachynia distachya)	LOC100843408 BRADI_1g21560	Name=LOC100843408 {ECO:0000313|EnsemblPlants:BRADI1G21560.1}; ORFNames=BRADI_1g21560 {ECO:0000313|EMBL:KQK15271.1};	I1GSE5_BRADI	I1GSE5	Uncharacterized protein	SubName: Full=Uncharacterized protein {ECO:0000313|EMBL:KQK15271.1, ECO:0000313|EnsemblPlants:BRADI1G21560.1};	bdi:100843408	IPR002035;IPR036465	XP_010235662.1	ENOG410IK1P;COG2304	EOG093602XF	PF13768	PS50234
	TRINITY_DN31004_c0_g1_i2	tr|I1I1C5|I1I1C5_BRADI	Brachypodium distachyon (Purple false brome) (Trachynia distachya)	LOC100832352 BRADI_3g16250	Name=LOC100832352 {ECO:0000313|EnsemblPlants:BRADI3G16250.1}; ORFNames=BRADI_3g16250 {ECO:0000313|EMBL:KQJ95284.1};	I1I1C5_BRADI	I1I1C5	Uncharacterized protein	SubName: Full=Uncharacterized protein {ECO:0000313|EMBL:KQJ95284.1, ECO:0000313|EnsemblPlants:BRADI3G16250.1};	bdi:100832352	IPR006595;IPR006594;IPR027728;IPR015943;IPR001680;IPR019775;IPR017986;IPR036322	XP_003573449.1	ENOG410IQ0P;ENOG410ZSJG	EOG093600HU	PF00400	PS50897;PS50896;PS00678;PS50082;PS50294	PTHR44083
	TRINITY_DN31051_c0_g1_i3	tr|F0Y6X5|F0Y6X5_AURAN	Aureococcus anophagefferens (Harmful bloom alga)	AURANDRAFT_63431	ORFNames=AURANDRAFT_63431 {ECO:0000313|EMBL:EGB08919.1};	F0Y6X5_AURAN	F0Y6X5	Uncharacterized protein	SubName: Full=Uncharacterized protein {ECO:0000313|EMBL:EGB08919.1};	aaf:AURANDRAFT_63431		XP_009036053.1
	TRINITY_DN31051_c0_g1_i4	tr|F0Y6X5|F0Y6X5_AURAN	Aureococcus anophagefferens (Harmful bloom alga)	AURANDRAFT_63431	ORFNames=AURANDRAFT_63431 {ECO:0000313|EMBL:EGB08919.1};	F0Y6X5_AURAN	F0Y6X5	Uncharacterized protein	SubName: Full=Uncharacterized protein {ECO:0000313|EMBL:EGB08919.1};	aaf:AURANDRAFT_63431		XP_009036053.1
	TRINITY_DN31051_c0_g1_i1	tr|F0Y6X5|F0Y6X5_AURAN	Aureococcus anophagefferens (Harmful bloom alga)	AURANDRAFT_63431	ORFNames=AURANDRAFT_63431 {ECO:0000313|EMBL:EGB08919.1};	F0Y6X5_AURAN	F0Y6X5	Uncharacterized protein	SubName: Full=Uncharacterized protein {ECO:0000313|EMBL:EGB08919.1};	aaf:AURANDRAFT_63431		XP_009036053.1
	TRINITY_DN39693_c3_g1_i1	sp|Q7ZVI7|ACTB1_DANRE	Danio rerio (Zebrafish) (Brachydanio rerio)	actba bact, bactin1, bactzf	Name=actba; Synonyms=bact, bactin1, bactzf;	ACTB1_DANRE	Q7ZVI7	Actin, cytoplasmic 1; Beta-actin-1; Actin, cytoplasmic 1, N-terminally processed	RecName: Full=Actin, cytoplasmic 1; AltName: Full=Beta-actin-1; Contains: RecName: Full=Actin, cytoplasmic 1, N-terminally processed;	dre:57934	IPR004000;IPR020902;IPR004001	NP_571106.1	KOG0676;COG5277	EOG091G08LD	PF00022	PS00406;PS00432;PS01132	PTHR11937
	TRINITY_DN39645_c0_g1_i4	tr|F4SCC1|F4SCC1_MELLP	Melampsora larici-populina (strain 98AG31 / pathotype 3-4-7) (Poplar leaf rust fungus)	MELLADRAFT_84525	ORFNames=MELLADRAFT_84525 {ECO:0000313|EMBL:EGF97697.1};	F4SCC1_MELLP	F4SCC1	Uncharacterized protein	SubName: Full=Uncharacterized protein {ECO:0000313|EMBL:EGF97697.1};	mlr:MELLADRAFT_84525		XP_007419020.1		EOG092C5Q4W
	TRINITY_DN39645_c1_g1_i2	tr|E9HZ40|E9HZ40_DAPPU	Daphnia pulex (Water flea)	DAPPUDRAFT_119636	ORFNames=DAPPUDRAFT_119636 {ECO:0000313|EMBL:EFX62987.1};	E9HZ40_DAPPU	E9HZ40	Uncharacterized protein	SubName: Full=Uncharacterized protein {ECO:0000313|EMBL:EFX62987.1};	dpx:DAPPUDRAFT_119636			ENOG410J6PY;ENOG410Y6RQ
	TRINITY_DN39606_c0_g1_i5	tr|J3MGT6|J3MGT6_ORYBR	Oryza brachyantha (malo sina)	102710311	Name=102710311 {ECO:0000313|EnsemblPlants:OB06G32300.1};	J3MGT6_ORYBR	J3MGT6	Uncharacterized protein	SubName: Full=Uncharacterized protein {ECO:0000313|EnsemblPlants:OB06G32300.1};	obr:102710311	IPR001046	XP_006656371.1	KOG1291;COG1914	EOG0936089S	PF01566		PTHR11706	TIGR01197
	TRINITY_DN54476_c0_g1_i1	tr|K3YC18|K3YC18_SETIT	Setaria italica (Foxtail millet) (Panicum italicum)	LOC101757899 SETIT_011762mg	Name=LOC101757899 {ECO:0000313|EnsemblPlants:Si011762m}; ORFNames=SETIT_011762mg {ECO:0000313|EMBL:KQK99056.1};	K3YC18_SETIT	K3YC18	Uncharacterized protein	SubName: Full=Uncharacterized protein {ECO:0000313|EMBL:KQK99056.1, ECO:0000313|EnsemblPlants:Si011762m};	sita:101757899	IPR001509;IPR036291	XP_012703066.1	KOG1502;COG0451	EOG09360FAZ	PF01370
	TRINITY_DN54456_c5_g1_i1	tr|I4Y519|I4Y519_WALMC	Wallemia mellicola (strain ATCC MYA-4683 / CBS 633.66) (Wallemia sebi (CBS 633.66))	WALSEDRAFT_49592	ORFNames=WALSEDRAFT_49592 {ECO:0000313|EMBL:EIM19061.1};	I4Y519_WALMC	I4Y519	Uncharacterized protein	SubName: Full=Uncharacterized protein {ECO:0000313|EMBL:EIM19061.1};	wse:WALSEDRAFT_49592		XP_006960894.1
	TRINITY_DN54401_c1_g1_i1	tr|I1H317|I1H317_BRADI	Brachypodium distachyon (Purple false brome) (Trachynia distachya)	LOC100834386 BRADI_1g55310	Name=LOC100834386 {ECO:0000313|EnsemblPlants:BRADI1G55310.1}; ORFNames=BRADI_1g55310 {ECO:0000313|EMBL:KQK20555.1};	I1H317_BRADI	I1H317	Uncharacterized protein	SubName: Full=Uncharacterized protein {ECO:0000313|EMBL:KQK20555.1, ECO:0000313|EnsemblPlants:BRADI1G55310.1};	bdi:100830239	IPR013763;IPR036915;IPR006671	XP_003557470.1	KOG0835;COG5333	EOG09360F3H	PF00134
	TRINITY_DN65047_c0_g3_i2	tr|I1GL12|I1GL12_BRADI	Brachypodium distachyon (Purple false brome) (Trachynia distachya)	LOC100825794 BRADI_1g02160	Name=LOC100825794 {ECO:0000313|EnsemblPlants:BRADI1G02160.1}; ORFNames=BRADI_1g02160 {ECO:0000313|EMBL:KQK12204.1};	I1GL12_BRADI	I1GL12	Uncharacterized protein	SubName: Full=Uncharacterized protein {ECO:0000313|EMBL:KQK12204.1, ECO:0000313|EnsemblPlants:BRADI1G02160.1};	bdi:100825794	IPR011009;IPR000719;IPR017441;IPR008271	XP_003562606.1	KOG0658;COG0515	EOG093609V0	PF00069	PS00107;PS50011;PS00108
	TRINITY_DN65047_c0_g3_i3	tr|I1GL12|I1GL12_BRADI	Brachypodium distachyon (Purple false brome) (Trachynia distachya)	LOC100825794 BRADI_1g02160	Name=LOC100825794 {ECO:0000313|EnsemblPlants:BRADI1G02160.1}; ORFNames=BRADI_1g02160 {ECO:0000313|EMBL:KQK12204.1};	I1GL12_BRADI	I1GL12	Uncharacterized protein	SubName: Full=Uncharacterized protein {ECO:0000313|EMBL:KQK12204.1, ECO:0000313|EnsemblPlants:BRADI1G02160.1};	bdi:100825794	IPR011009;IPR000719;IPR017441;IPR008271	XP_003562606.1	KOG0658;COG0515	EOG093609V0	PF00069	PS00107;PS50011;PS00108
	TRINITY_DN65031_c0_g1_i1	tr|I1GM39|I1GM39_BRADI	Brachypodium distachyon (Purple false brome) (Trachynia distachya)	LOC100829954 BRADI_1g05162	Name=LOC100829954 {ECO:0000313|EnsemblPlants:BRADI1G05162.1}; ORFNames=BRADI_1g05162 {ECO:0000313|EMBL:KQK12655.1};	I1GM39_BRADI	I1GM39	Uncharacterized protein	SubName: Full=Uncharacterized protein {ECO:0000313|EMBL:KQK12655.1, ECO:0000313|EnsemblPlants:BRADI1G05162.1};	bdi:100829954	IPR014811;IPR032472;IPR032473;IPR032474;IPR003100;IPR036085;IPR003165;IPR012337;IPR036397	XP_014754821.1	KOG1041;ENOG410XP07	EOG093600M2	PF08699;PF16488;PF16487;PF16486;PF02170;PF02171	PS50821;PS50822
	TRINITY_DN65031_c0_g1_i6	tr|I1GM39|I1GM39_BRADI	Brachypodium distachyon (Purple false brome) (Trachynia distachya)	LOC100829954 BRADI_1g05162	Name=LOC100829954 {ECO:0000313|EnsemblPlants:BRADI1G05162.1}; ORFNames=BRADI_1g05162 {ECO:0000313|EMBL:KQK12655.1};	I1GM39_BRADI	I1GM39	Uncharacterized protein	SubName: Full=Uncharacterized protein {ECO:0000313|EMBL:KQK12655.1, ECO:0000313|EnsemblPlants:BRADI1G05162.1};	bdi:100829954	IPR014811;IPR032472;IPR032473;IPR032474;IPR003100;IPR036085;IPR003165;IPR012337;IPR036397	XP_014754821.1	KOG1041;ENOG410XP07	EOG093600M2	PF08699;PF16488;PF16487;PF16486;PF02170;PF02171	PS50821;PS50822
	TRINITY_DN65058_c0_g2_i1	tr|L8HM38|L8HM38_ACACA	Acanthamoeba castellanii str. Neff	ACA1_326820	ORFNames=ACA1_326820 {ECO:0000313|EMBL:ELR25723.1};	L8HM38_ACACA	L8HM38	Eukaryotic ribosomal protein L18, putative	SubName: Full=Eukaryotic ribosomal protein L18, putative {ECO:0000313|EMBL:ELR25723.1};	acan:ACA1_326820	IPR036227;IPR000039;IPR021131	XP_004358287.1			PF17135		PTHR10934
	TRINITY_DN50284_c0_g1_i8	tr|A0A0Q3JP38|A0A0Q3JP38_BRADI	Brachypodium distachyon (Purple false brome) (Trachynia distachya)	BRADI_1g48747	ORFNames=BRADI_1g48747 {ECO:0000313|EMBL:KQK19515.1};	A0A0Q3JP38_BRADI	A0A0Q3JP38	Uncharacterized protein	SubName: Full=Uncharacterized protein {ECO:0000313|EMBL:KQK19515.1};	bdi:100829777	IPR032675;IPR002182;IPR027417;IPR036388	XP_010228014.1;XP_010228015.1			PF00931
	TRINITY_DN50284_c0_g1_i9	tr|A0A0Q3JP38|A0A0Q3JP38_BRADI	Brachypodium distachyon (Purple false brome) (Trachynia distachya)	BRADI_1g48747	ORFNames=BRADI_1g48747 {ECO:0000313|EMBL:KQK19515.1};	A0A0Q3JP38_BRADI	A0A0Q3JP38	Uncharacterized protein	SubName: Full=Uncharacterized protein {ECO:0000313|EMBL:KQK19515.1};	bdi:100829777	IPR032675;IPR002182;IPR027417;IPR036388	XP_010228014.1;XP_010228015.1			PF00931
	TRINITY_DN50284_c0_g1_i5	tr|A0A0Q3JP38|A0A0Q3JP38_BRADI	Brachypodium distachyon (Purple false brome) (Trachynia distachya)	BRADI_1g48747	ORFNames=BRADI_1g48747 {ECO:0000313|EMBL:KQK19515.1};	A0A0Q3JP38_BRADI	A0A0Q3JP38	Uncharacterized protein	SubName: Full=Uncharacterized protein {ECO:0000313|EMBL:KQK19515.1};	bdi:100829777	IPR032675;IPR002182;IPR027417;IPR036388	XP_010228014.1;XP_010228015.1			PF00931
	TRINITY_DN50284_c0_g1_i4	tr|A0A0Q3JP38|A0A0Q3JP38_BRADI	Brachypodium distachyon (Purple false brome) (Trachynia distachya)	BRADI_1g48747	ORFNames=BRADI_1g48747 {ECO:0000313|EMBL:KQK19515.1};	A0A0Q3JP38_BRADI	A0A0Q3JP38	Uncharacterized protein	SubName: Full=Uncharacterized protein {ECO:0000313|EMBL:KQK19515.1};	bdi:100829777	IPR032675;IPR002182;IPR027417;IPR036388	XP_010228014.1;XP_010228015.1			PF00931
	TRINITY_DN57313_c4_g1_i1	tr|I1HSY0|I1HSY0_BRADI	Brachypodium distachyon (Purple false brome) (Trachynia distachya)	LOC100844054 BRADI_2g53650	Name=LOC100844054 {ECO:0000313|EnsemblPlants:BRADI2G53650.1}; ORFNames=BRADI_2g53650 {ECO:0000313|EMBL:KQK10372.1};	I1HSY0_BRADI	I1HSY0	RING-type E3 ubiquitin transferase	RecName: Full=RING-type E3 ubiquitin transferase {ECO:0000256|SAAS:SAAS00702733}; EC=2.3.2.27 {ECO:0000256|SAAS:SAAS00702733};	bdi:100844054	IPR011989;IPR016024;IPR000225;IPR003613;IPR013083	XP_003564508.1	ENOG410ITMQ;ENOG410XQT6	EOG093607ET	PF00514;PF04564	PS50176;PS51698
	TRINITY_DN50788_c1_g1_i1	tr|A0A059A7M7|A0A059A7M7_EUCGR	Eucalyptus grandis (Flooded gum)	EUGRSUZ_K03238	ORFNames=EUGRSUZ_K03238 {ECO:0000313|EMBL:KCW49739.1};	A0A059A7M7_EUCGR	A0A059A7M7	Uncharacterized protein	SubName: Full=Uncharacterized protein {ECO:0000313|EMBL:KCW49739.1};	egr:104426550	IPR036869;IPR001623;IPR018253;IPR013026;IPR011990;IPR013105;IPR019734	XP_010037954.1			PF00226;PF07719	PS00636;PS50076;PS50005;PS50293
	TRINITY_DN50728_c0_g1_i3	tr|I0YW05|I0YW05_COCSC	Coccomyxa subellipsoidea (strain C-169) (Green microalga)	COCSUDRAFT_53588	ORFNames=COCSUDRAFT_53588 {ECO:0000313|EMBL:EIE22574.1};	I0YW05_COCSC	I0YW05	ClpB chaperone, Hsp100 family	SubName: Full=ClpB chaperone, Hsp100 family {ECO:0000313|EMBL:EIE22574.1};	csl:COCSUDRAFT_53588	IPR003593;IPR003959;IPR017730;IPR019489;IPR004176;IPR036628;IPR001270;IPR018368;IPR028299;IPR027417	XP_005647118.1			PF00004;PF07724;PF02861;PF10431	PS00870;PS00871		TIGR03346
	TRINITY_DN50756_c0_g1_i1	tr|I1GQZ4|I1GQZ4_BRADI	Brachypodium distachyon (Purple false brome) (Trachynia distachya)	LOC100822715 BRADI_1g17220	Name=LOC100822715 {ECO:0000313|EnsemblPlants:BRADI1G17220.1}; ORFNames=BRADI_1g17220 {ECO:0000313|EMBL:KQK14555.1};	I1GQZ4_BRADI	I1GQZ4	Uncharacterized protein	SubName: Full=Uncharacterized protein {ECO:0000313|EMBL:KQK14555.1, ECO:0000313|EnsemblPlants:BRADI1G17220.1};	bdi:100822715	IPR000297;IPR001763;IPR036873	XP_003562428.1	KOG2017;COG0607;COG0760	EOG09360K1R	PF00581	PS50198;PS50206
	TRINITY_DN50719_c0_g1_i1	tr|A0A067CD83|A0A067CD83_SAPPC	Saprolegnia parasitica (strain CBS 223.65)	SPRG_09623	ORFNames=SPRG_09623 {ECO:0000313|EMBL:KDO24762.1};	A0A067CD83_SAPPC	A0A067CD83	Elongation factor Tu	RecName: Full=Elongation factor Tu {ECO:0000256|RuleBase:RU004061};	spar:SPRG_09623	IPR004161;IPR033720;IPR031157;IPR027417;IPR005225;IPR000795;IPR009000;IPR009001;IPR004541;IPR004160	XP_012204439.1			PF00009;PF03144;PF03143	PS00301;PS51722		TIGR00485;TIGR00231
	TRINITY_DN50719_c0_g1_i3	tr|F0Y7E0|F0Y7E0_AURAN	Aureococcus anophagefferens (Harmful bloom alga)	AURANDRAFT_60042	ORFNames=AURANDRAFT_60042 {ECO:0000313|EMBL:EGB09195.1};	F0Y7E0_AURAN	F0Y7E0	Elongation factor Tu	RecName: Full=Elongation factor Tu {ECO:0000256|RuleBase:RU004061};	aaf:AURANDRAFT_60042	IPR004161;IPR033720;IPR031157;IPR027417;IPR005225;IPR000795;IPR009000;IPR009001;IPR004541;IPR004160	XP_009036304.1			PF00009;PF03144;PF03143	PS00301;PS51722		TIGR00485;TIGR00231
	TRINITY_DN50715_c0_g1_i2	tr|I1HLS9|I1HLS9_BRADI	Brachypodium distachyon (Purple false brome) (Trachynia distachya)	LOC100822956 BRADI_2g35760	Name=LOC100822956 {ECO:0000313|EnsemblPlants:BRADI2G35760.2}; ORFNames=BRADI_2g35760 {ECO:0000313|EMBL:KQK07492.1};	I1HLS9_BRADI	I1HLS9	Pyridoxal phosphate homeostasis protein; PLP homeostasis protein	RecName: Full=Pyridoxal phosphate homeostasis protein {ECO:0000256|HAMAP-Rule:MF_03225}; Short=PLP homeostasis protein {ECO:0000256|HAMAP-Rule:MF_03225};	bdi:100822956	IPR001608;IPR029066;IPR011078	XP_003568925.1;XP_010231697.1	KOG3157;COG0325	EOG09360KLL	PF01168	PS01211	PTHR10146	TIGR00044
	TRINITY_DN50715_c0_g1_i1	tr|I1HLS9|I1HLS9_BRADI	Brachypodium distachyon (Purple false brome) (Trachynia distachya)	LOC100822956 BRADI_2g35760	Name=LOC100822956 {ECO:0000313|EnsemblPlants:BRADI2G35760.2}; ORFNames=BRADI_2g35760 {ECO:0000313|EMBL:KQK07492.1};	I1HLS9_BRADI	I1HLS9	Pyridoxal phosphate homeostasis protein; PLP homeostasis protein	RecName: Full=Pyridoxal phosphate homeostasis protein {ECO:0000256|HAMAP-Rule:MF_03225}; Short=PLP homeostasis protein {ECO:0000256|HAMAP-Rule:MF_03225};	bdi:100822956	IPR001608;IPR029066;IPR011078	XP_003568925.1;XP_010231697.1	KOG3157;COG0325	EOG09360KLL	PF01168	PS01211	PTHR10146	TIGR00044
	TRINITY_DN47270_c0_g1_i1	sp|P59223|RS131_ARATH	Arabidopsis thaliana (Mouse-ear cress)	RPS13A At3g60770 T4C21_180	Name=RPS13A; OrderedLocusNames=At3g60770; ORFNames=T4C21_180;	RS131_ARATH	P59223	40S ribosomal protein S13-1	RecName: Full=40S ribosomal protein S13-1;	ath:AT3G60770	IPR012606;IPR000589;IPR023029;IPR009068	NP_567104.1	KOG0400;COG0184	EOG09360QD7	PF08069;PF00312	PS00362	PTHR11885
	TRINITY_DN47270_c0_g2_i1	tr|A0A1S2YLD5|A0A1S2YLD5_CICAR	Cicer arietinum (Chickpea) (Garbanzo)	LOC101501622 LOC101500205	Name=LOC101501622 {ECO:0000313|RefSeq:XP_004506541.1}; Synonyms=LOC101500205 {ECO:0000313|RefSeq:XP_004515770.1};	A0A1S2YLD5_CICAR	A0A1S2YLD5	40S ribosomal protein S13	SubName: Full=40S ribosomal protein S13 {ECO:0000313|RefSeq:XP_004506541.1, ECO:0000313|RefSeq:XP_004515770.1};	cam:101500205;cam:101501622	IPR012606;IPR000589;IPR023029;IPR009068	XP_004506541.1;XP_004515770.1			PF08069;PF00312	PS00362	PTHR11885
	TRINITY_DN47229_c1_g1_i1	tr|T1FMD2|T1FMD2_HELRO	Helobdella robusta (Californian leech)	20209981 HELRODRAFT_185075	Name=20209981 {ECO:0000313|EnsemblMetazoa:HelroP185075}; ORFNames=HELRODRAFT_185075 {ECO:0000313|EMBL:ESN96225.1};	T1FMD2_HELRO	T1FMD2	Uncharacterized protein	SubName: Full=Uncharacterized protein {ECO:0000313|EMBL:ESN96225.1, ECO:0000313|EnsemblMetazoa:HelroP185075};	hro:HELRODRAFT_185075	IPR004000;IPR020902;IPR004001	XP_009025437.1		EOG091G08LD	PF00022	PS00406;PS00432;PS01132	PTHR11937
	TRINITY_DN21722_c0_g2_i1	tr|A0A067KPA7|A0A067KPA7_JATCU	Jatropha curcas (Barbados nut)	JCGZ_04699	ORFNames=JCGZ_04699 {ECO:0000313|EMBL:KDP38056.1};	A0A067KPA7_JATCU	A0A067KPA7	Mitogen-activated protein kinase	RecName: Full=Mitogen-activated protein kinase {ECO:0000256|SAAS:SAAS00652812}; EC=2.7.11.24 {ECO:0000256|SAAS:SAAS00652812};	jcu:105634061	IPR011009;IPR003527;IPR000719;IPR017441	XP_012072221.1			PF00069	PS01351;PS00107;PS50011
	TRINITY_DN21722_c0_g2_i4	tr|A0A067KPA7|A0A067KPA7_JATCU	Jatropha curcas (Barbados nut)	JCGZ_04699	ORFNames=JCGZ_04699 {ECO:0000313|EMBL:KDP38056.1};	A0A067KPA7_JATCU	A0A067KPA7	Mitogen-activated protein kinase	RecName: Full=Mitogen-activated protein kinase {ECO:0000256|SAAS:SAAS00652812}; EC=2.7.11.24 {ECO:0000256|SAAS:SAAS00652812};	jcu:105634061	IPR011009;IPR003527;IPR000719;IPR017441	XP_012072221.1			PF00069	PS01351;PS00107;PS50011
	TRINITY_DN97199_c0_g1_i1	tr|L1JZE3|L1JZE3_GUITH	Guillardia theta CCMP2712	GUITHDRAFT_159157	ORFNames=GUITHDRAFT_159157 {ECO:0000313|EMBL:EKX53956.1};	L1JZE3_GUITH	L1JZE3	Uncharacterized protein	SubName: Full=Uncharacterized protein {ECO:0000313|EMBL:EKX53956.1, ECO:0000313|EnsemblProtists:EKX53956};	gtt:GUITHDRAFT_159157	IPR004839;IPR015424;IPR015421;IPR015422	XP_005840936.1			PF00155
	TRINITY_DN97112_c0_g1_i2	tr|A0A1X7VNA3|A0A1X7VNA3_AMPQE	Amphimedon queenslandica (Sponge)			A0A1X7VNA3_AMPQE	A0A1X7VNA3	Uncharacterized protein	SubName: Full=Uncharacterized protein {ECO:0000313|EnsemblMetazoa:Aqu2.1.41364_001};	aqu:100635096	IPR036227;IPR030878;IPR005749;IPR021131	XP_003383492.1			PF00828		PTHR12934	TIGR01071
	TRINITY_DN15207_c0_g1_i5	tr|I1GYD2|I1GYD2_BRADI	Brachypodium distachyon (Purple false brome) (Trachynia distachya)	LOC100840099 BRADI_1g39520	Name=LOC100840099 {ECO:0000313|EnsemblPlants:BRADI1G39520.1}; ORFNames=BRADI_1g39520 {ECO:0000313|EMBL:KQK18243.1};	I1GYD2_BRADI	I1GYD2	Uncharacterized protein	SubName: Full=Uncharacterized protein {ECO:0000313|EMBL:KQK18243.1, ECO:0000313|EnsemblPlants:BRADI1G39520.1};	bdi:100840099	IPR003369;IPR006312;IPR003998	XP_003563823.1	ENOG410IYN7;ENOG41122QH	EOG09360N4S	PF02416			TIGR01411
	TRINITY_DN15249_c0_g2_i7	tr|K3XLR3|K3XLR3_SETIT	Setaria italica (Foxtail millet) (Panicum italicum)	LOC101775708 SETIT_002836mg	Name=LOC101775708 {ECO:0000313|EnsemblPlants:Si002836m}; ORFNames=SETIT_002836mg {ECO:0000313|EMBL:KQL06637.1};	K3XLR3_SETIT	K3XLR3	Uncharacterized protein	SubName: Full=Uncharacterized protein {ECO:0000313|EMBL:KQL06637.1, ECO:0000313|EnsemblPlants:Si002836m};	sita:101775708	IPR027027;IPR010989;IPR007705	XP_004969702.1	KOG1666;ENOG4111J90	EOG09360PI6	PF05008
	TRINITY_DN15249_c0_g2_i8	tr|K3XLR3|K3XLR3_SETIT	Setaria italica (Foxtail millet) (Panicum italicum)	LOC101775708 SETIT_002836mg	Name=LOC101775708 {ECO:0000313|EnsemblPlants:Si002836m}; ORFNames=SETIT_002836mg {ECO:0000313|EMBL:KQL06637.1};	K3XLR3_SETIT	K3XLR3	Uncharacterized protein	SubName: Full=Uncharacterized protein {ECO:0000313|EMBL:KQL06637.1, ECO:0000313|EnsemblPlants:Si002836m};	sita:101775708	IPR027027;IPR010989;IPR007705	XP_004969702.1	KOG1666;ENOG4111J90	EOG09360PI6	PF05008
	TRINITY_DN15249_c0_g2_i5	tr|K3XLR3|K3XLR3_SETIT	Setaria italica (Foxtail millet) (Panicum italicum)	LOC101775708 SETIT_002836mg	Name=LOC101775708 {ECO:0000313|EnsemblPlants:Si002836m}; ORFNames=SETIT_002836mg {ECO:0000313|EMBL:KQL06637.1};	K3XLR3_SETIT	K3XLR3	Uncharacterized protein	SubName: Full=Uncharacterized protein {ECO:0000313|EMBL:KQL06637.1, ECO:0000313|EnsemblPlants:Si002836m};	sita:101775708	IPR027027;IPR010989;IPR007705	XP_004969702.1	KOG1666;ENOG4111J90	EOG09360PI6	PF05008
	TRINITY_DN15249_c0_g2_i2	tr|K3XLR3|K3XLR3_SETIT	Setaria italica (Foxtail millet) (Panicum italicum)	LOC101775708 SETIT_002836mg	Name=LOC101775708 {ECO:0000313|EnsemblPlants:Si002836m}; ORFNames=SETIT_002836mg {ECO:0000313|EMBL:KQL06637.1};	K3XLR3_SETIT	K3XLR3	Uncharacterized protein	SubName: Full=Uncharacterized protein {ECO:0000313|EMBL:KQL06637.1, ECO:0000313|EnsemblPlants:Si002836m};	sita:101775708	IPR027027;IPR010989;IPR007705	XP_004969702.1	KOG1666;ENOG4111J90	EOG09360PI6	PF05008
	TRINITY_DN15249_c0_g2_i3	tr|K3XLR3|K3XLR3_SETIT	Setaria italica (Foxtail millet) (Panicum italicum)	LOC101775708 SETIT_002836mg	Name=LOC101775708 {ECO:0000313|EnsemblPlants:Si002836m}; ORFNames=SETIT_002836mg {ECO:0000313|EMBL:KQL06637.1};	K3XLR3_SETIT	K3XLR3	Uncharacterized protein	SubName: Full=Uncharacterized protein {ECO:0000313|EMBL:KQL06637.1, ECO:0000313|EnsemblPlants:Si002836m};	sita:101775708	IPR027027;IPR010989;IPR007705	XP_004969702.1	KOG1666;ENOG4111J90	EOG09360PI6	PF05008
	TRINITY_DN15249_c0_g2_i12	tr|K3XLR3|K3XLR3_SETIT	Setaria italica (Foxtail millet) (Panicum italicum)	LOC101775708 SETIT_002836mg	Name=LOC101775708 {ECO:0000313|EnsemblPlants:Si002836m}; ORFNames=SETIT_002836mg {ECO:0000313|EMBL:KQL06637.1};	K3XLR3_SETIT	K3XLR3	Uncharacterized protein	SubName: Full=Uncharacterized protein {ECO:0000313|EMBL:KQL06637.1, ECO:0000313|EnsemblPlants:Si002836m};	sita:101775708	IPR027027;IPR010989;IPR007705	XP_004969702.1	KOG1666;ENOG4111J90	EOG09360PI6	PF05008
	TRINITY_DN15249_c0_g2_i10	tr|K3XLR3|K3XLR3_SETIT	Setaria italica (Foxtail millet) (Panicum italicum)	LOC101775708 SETIT_002836mg	Name=LOC101775708 {ECO:0000313|EnsemblPlants:Si002836m}; ORFNames=SETIT_002836mg {ECO:0000313|EMBL:KQL06637.1};	K3XLR3_SETIT	K3XLR3	Uncharacterized protein	SubName: Full=Uncharacterized protein {ECO:0000313|EMBL:KQL06637.1, ECO:0000313|EnsemblPlants:Si002836m};	sita:101775708	IPR027027;IPR010989;IPR007705	XP_004969702.1	KOG1666;ENOG4111J90	EOG09360PI6	PF05008
	TRINITY_DN15249_c0_g2_i4	tr|K3XLR3|K3XLR3_SETIT	Setaria italica (Foxtail millet) (Panicum italicum)	LOC101775708 SETIT_002836mg	Name=LOC101775708 {ECO:0000313|EnsemblPlants:Si002836m}; ORFNames=SETIT_002836mg {ECO:0000313|EMBL:KQL06637.1};	K3XLR3_SETIT	K3XLR3	Uncharacterized protein	SubName: Full=Uncharacterized protein {ECO:0000313|EMBL:KQL06637.1, ECO:0000313|EnsemblPlants:Si002836m};	sita:101775708	IPR027027;IPR010989;IPR007705	XP_004969702.1	KOG1666;ENOG4111J90	EOG09360PI6	PF05008
	TRINITY_DN15249_c0_g2_i13	tr|K3XLR3|K3XLR3_SETIT	Setaria italica (Foxtail millet) (Panicum italicum)	LOC101775708 SETIT_002836mg	Name=LOC101775708 {ECO:0000313|EnsemblPlants:Si002836m}; ORFNames=SETIT_002836mg {ECO:0000313|EMBL:KQL06637.1};	K3XLR3_SETIT	K3XLR3	Uncharacterized protein	SubName: Full=Uncharacterized protein {ECO:0000313|EMBL:KQL06637.1, ECO:0000313|EnsemblPlants:Si002836m};	sita:101775708	IPR027027;IPR010989;IPR007705	XP_004969702.1	KOG1666;ENOG4111J90	EOG09360PI6	PF05008
	TRINITY_DN15229_c0_g1_i1	tr|G4ZQP8|G4ZQP8_PHYSP	Phytophthora sojae (strain P6497) (Soybean stem and root rot agent) (Phytophthora megasperma f. sp. glycines)	PHYSODRAFT_510154	ORFNames=PHYSODRAFT_510154 {ECO:0000313|EMBL:EGZ16149.1};	G4ZQP8_PHYSP	G4ZQP8	40S ribosomal protein S12	RecName: Full=40S ribosomal protein S12 {ECO:0000256|RuleBase:RU000670};	psoj:PHYSODRAFT_510154	IPR029064;IPR004038;IPR000530	XP_009529898.1			PF01248	PS01189	PTHR11843
	TRINITY_DN56244_c0_g1_i2	tr|F4QE52|F4QE52_DICFS	Dictyostelium fasciculatum (strain SH3) (Slime mold)	DD3-3 DFA_11760	Name=DD3-3 {ECO:0000313|EMBL:EGG13999.1}; ORFNames=DFA_11760 {ECO:0000313|EMBL:EGG13999.1};	F4QE52_DICFS	F4QE52	Uncharacterized protein DD3-3	SubName: Full=Uncharacterized protein DD3-3 {ECO:0000313|EMBL:EGG13999.1};	dfa:DFA_11760	IPR008972	XP_004350707.1
	TRINITY_DN56249_c0_g1_i1	tr|K7M454|K7M454_SOYBN	Glycine max (Soybean) (Glycine hispida)	LOC100797133 GLYMA_14G002100	Name=LOC100797133 {ECO:0000313|EnsemblPlants:GLYMA14G00520.2}; ORFNames=GLYMA_14G002100 {ECO:0000313|EMBL:KRH14026.1};	K7M454_SOYBN	K7M454	Uncharacterized protein	SubName: Full=Uncharacterized protein {ECO:0000313|EMBL:KRH14026.1, ECO:0000313|EnsemblPlants:GLYMA14G00520.2};	gmx:100797133	IPR024709;IPR019378	XP_003545060.2		EOG093606IN	PF10250
	TRINITY_DN25339_c0_g1_i1	tr|I1GV37|I1GV37_BRADI	Brachypodium distachyon (Purple false brome) (Trachynia distachya)	LOC100833467 BRADI_1g29520	Name=LOC100833467 {ECO:0000313|EnsemblPlants:BRADI1G29520.1}; ORFNames=BRADI_1g29520 {ECO:0000313|EMBL:KQK16614.1};	I1GV37_BRADI	I1GV37	Uncharacterized protein	SubName: Full=Uncharacterized protein {ECO:0000313|EMBL:KQK16614.1, ECO:0000313|EnsemblPlants:BRADI1G29520.1};	bdi:100833467	IPR016169;IPR016166;IPR036318;IPR006094	XP_003563224.1	KOG1262;COG0277	EOG093604W3	PF01565	PS51387
	TRINITY_DN2518_c2_g1_i1	tr|A0A1S2XC20|A0A1S2XC20_CICAR	Cicer arietinum (Chickpea) (Garbanzo)	LOC101490100	Name=LOC101490100 {ECO:0000313|RefSeq:XP_004487038.1};	A0A1S2XC20_CICAR	A0A1S2XC20	60S ribosomal protein L23a-2-like	SubName: Full=60S ribosomal protein L23a-2-like {ECO:0000313|RefSeq:XP_004487038.1};	cam:101490100	IPR019985;IPR012678;IPR001014;IPR005633;IPR013025	XP_004487038.1			PF00276;PF03939	PS00050		TIGR03636
	TRINITY_DN2502_c0_g1_i3	tr|I1HUQ5|I1HUQ5_BRADI	Brachypodium distachyon (Purple false brome) (Trachynia distachya)	LOC100826741 BRADI_2g59200	Name=LOC100826741 {ECO:0000313|EnsemblPlants:BRADI2G59200.1}; ORFNames=BRADI_2g59200 {ECO:0000313|EMBL:KQK11283.1};	I1HUQ5_BRADI	I1HUQ5	Uncharacterized protein	SubName: Full=Uncharacterized protein {ECO:0000313|EMBL:KQK11283.1, ECO:0000313|EnsemblPlants:BRADI2G59200.1};	bdi:100826741	IPR036047;IPR001810;IPR011043;IPR015915	XP_003564961.1	ENOG410IIQ3;ENOG4111JVR	EOG0936088X	PF00646	PS50181
	TRINITY_DN2500_c0_g3_i1	tr|Q6L5I8|Q6L5I8_ORYSJ	Oryza sativa subsp. japonica (Rice)	Os05g0535700 Os05g0535700 OJ1741_B01.6, OSNPB_050535700	Name=Os05g0535700 {ECO:0000313|EMBL:BAS95074.1}; OrderedLocusNames=Os05g0535700 {ECO:0000313|EMBL:BAF18072.1}; ORFNames=OJ1741_B01.6 {ECO:0000313|EMBL:AAT39211.1}, OSNPB_050535700 {ECO:0000313|EMBL:BAS95074.1};	Q6L5I8_ORYSJ	Q6L5I8	Os05g0535700 protein; cDNA clone:001-021-H05, full insert sequence; cDNA clone:001-104-G06, full insert sequence	SubName: Full=Os05g0535700 protein {ECO:0000313|EMBL:BAF18072.1}; SubName: Full=cDNA clone:001-021-H05, full insert sequence {ECO:0000313|EMBL:BAG88026.1}; SubName: Full=cDNA clone:001-104-G06, full insert sequence {ECO:0000313|EMBL:BAG88360.1};	osa:4339442		XP_015637970.1		EOG093610AK
	TRINITY_DN49452_c0_g1_i1	tr|K3ZEC5|K3ZEC5_SETIT	Setaria italica (Foxtail millet) (Panicum italicum)	LOC101780095 SETIT_024919mg	Name=LOC101780095 {ECO:0000313|EnsemblPlants:Si024919m}; ORFNames=SETIT_024919mg {ECO:0000313|EMBL:KQL14211.1};	K3ZEC5_SETIT	K3ZEC5	Uncharacterized protein	SubName: Full=Uncharacterized protein {ECO:0000313|EMBL:KQL14211.1, ECO:0000313|EnsemblPlants:Si024919m};	sita:101780095	IPR029058;IPR002921;IPR033556	XP_004961148.1	KOG4569;COG3675	EOG093606IU	PF01764		PTHR31828
	TRINITY_DN49452_c0_g1_i3	tr|K3ZEC5|K3ZEC5_SETIT	Setaria italica (Foxtail millet) (Panicum italicum)	LOC101780095 SETIT_024919mg	Name=LOC101780095 {ECO:0000313|EnsemblPlants:Si024919m}; ORFNames=SETIT_024919mg {ECO:0000313|EMBL:KQL14211.1};	K3ZEC5_SETIT	K3ZEC5	Uncharacterized protein	SubName: Full=Uncharacterized protein {ECO:0000313|EMBL:KQL14211.1, ECO:0000313|EnsemblPlants:Si024919m};	sita:101780095	IPR029058;IPR002921;IPR033556	XP_004961148.1	KOG4569;COG3675	EOG093606IU	PF01764		PTHR31828
	TRINITY_DN42318_c0_g3_i2	tr|J9K1S3|J9K1S3_ACYPI	Acyrthosiphon pisum (Pea aphid)	LOC100574365	Name=LOC100574365 {ECO:0000313|EnsemblMetazoa:ACYPI006711-PA};	J9K1S3_ACYPI	J9K1S3	Elongation factor 1-alpha	RecName: Full=Elongation factor 1-alpha {ECO:0000256|RuleBase:RU000325};	api:100574365	IPR004161;IPR031157;IPR027417;IPR000795;IPR009000;IPR009001;IPR004539;IPR004160	XP_008182369.1	KOG0052;COG5256		PF00009;PF03144;PF03143	PS00301;PS51722		TIGR00483
	TRINITY_DN42318_c0_g3_i1	tr|J9K1S3|J9K1S3_ACYPI	Acyrthosiphon pisum (Pea aphid)	LOC100574365	Name=LOC100574365 {ECO:0000313|EnsemblMetazoa:ACYPI006711-PA};	J9K1S3_ACYPI	J9K1S3	Elongation factor 1-alpha	RecName: Full=Elongation factor 1-alpha {ECO:0000256|RuleBase:RU000325};	api:100574365	IPR004161;IPR031157;IPR027417;IPR000795;IPR009000;IPR009001;IPR004539;IPR004160	XP_008182369.1	KOG0052;COG5256		PF00009;PF03144;PF03143	PS00301;PS51722		TIGR00483
	TRINITY_DN92187_c0_g1_i1	tr|F0ZVR4|F0ZVR4_DICPU	Dictyostelium purpureum (Slime mold)	DICPUDRAFT_49867	ORFNames=DICPUDRAFT_49867 {ECO:0000313|EMBL:EGC31973.1};	F0ZVR4_DICPU	F0ZVR4	Heat shock protein	SubName: Full=Heat shock protein {ECO:0000313|EMBL:EGC31973.1};	dpp:DICPUDRAFT_49867	IPR018181;IPR029048;IPR029047;IPR013126	XP_003291509.1	KOG0101;COG0443		PF00012	PS00297;PS00329;PS01036
	TRINITY_DN92116_c0_g1_i1	tr|M2XQT7|M2XQT7_GALSU	Galdieria sulphuraria (Red alga)	Gasu_03700	ORFNames=Gasu_03700 {ECO:0000313|EMBL:EME32602.1};	M2XQT7_GALSU	M2XQT7	ATP-dependent Clp protease ATP-binding subunit ClpB	SubName: Full=ATP-dependent Clp protease ATP-binding subunit ClpB {ECO:0000313|EMBL:EME32602.1};	gsl:Gasu_03700	IPR003593;IPR003959;IPR019489;IPR004176;IPR036628;IPR001270;IPR018368;IPR028299;IPR027417	XP_005709122.1			PF00004;PF07724;PF02861;PF10431	PS00870;PS00871
	TRINITY_DN92169_c0_g1_i1	tr|L8HCV2|L8HCV2_ACACA	Acanthamoeba castellanii str. Neff	ACA1_035360	ORFNames=ACA1_035360 {ECO:0000313|EMBL:ELR22206.1};	L8HCV2_ACACA	L8HCV2	Actin binding protein	SubName: Full=Actin binding protein {ECO:0000313|EMBL:ELR22206.1};	acan:ACA1_035360	IPR002108;IPR029006	XP_004348720.1			PF00241	PS51263
	TRINITY_DN92169_c0_g2_i1	tr|L8HCV2|L8HCV2_ACACA	Acanthamoeba castellanii str. Neff	ACA1_035360	ORFNames=ACA1_035360 {ECO:0000313|EMBL:ELR22206.1};	L8HCV2_ACACA	L8HCV2	Actin binding protein	SubName: Full=Actin binding protein {ECO:0000313|EMBL:ELR22206.1};	acan:ACA1_035360	IPR002108;IPR029006	XP_004348720.1			PF00241	PS51263
	TRINITY_DN69752_c0_g1_i2	sp|Q61830|MRC1_MOUSE	Mus musculus (Mouse)	Mrc1	Name=Mrc1;	MRC1_MOUSE	Q61830	Macrophage mannose receptor 1; MMR	RecName: Full=Macrophage mannose receptor 1; Short=MMR; AltName: CD_antigen=CD206; Flags: Precursor;	mmu:17533	IPR001304;IPR016186;IPR018378;IPR016187;IPR000562;IPR036943;IPR013806;IPR035992;IPR000772	NP_032651.2	ENOG410IS47;ENOG410XRS3	EOG091G0EGC	PF00040;PF00059;PF00652	PS00615;PS50041;PS00023;PS51092;PS50231
	TRINITY_DN2724_c0_g1_i15	tr|Q2R339|Q2R339_ORYSJ	Oryza sativa subsp. japonica (Rice)	LOC_Os11g33240, Os11g0538900 OsJ_34145	OrderedLocusNames=LOC_Os11g33240 {ECO:0000313|EMBL:ABA94101.1}, Os11g0538900 {ECO:0000313|EMBL:BAF28394.1}; ORFNames=OsJ_34145 {ECO:0000313|EMBL:EAZ18623.1};	Q2R339_ORYSJ	Q2R339	Citrate synthase	RecName: Full=Citrate synthase {ECO:0000256|RuleBase:RU000441};	osa:4350660	IPR016142;IPR002020;IPR019810;IPR010109;IPR036969	XP_015618050.1	KOG2617;COG0372	EOG0936083W	PF00285	PS00480	PTHR11739	TIGR01793
	TRINITY_DN2724_c0_g1_i11	tr|Q2R339|Q2R339_ORYSJ	Oryza sativa subsp. japonica (Rice)	LOC_Os11g33240, Os11g0538900 OsJ_34145	OrderedLocusNames=LOC_Os11g33240 {ECO:0000313|EMBL:ABA94101.1}, Os11g0538900 {ECO:0000313|EMBL:BAF28394.1}; ORFNames=OsJ_34145 {ECO:0000313|EMBL:EAZ18623.1};	Q2R339_ORYSJ	Q2R339	Citrate synthase	RecName: Full=Citrate synthase {ECO:0000256|RuleBase:RU000441};	osa:4350660	IPR016142;IPR002020;IPR019810;IPR010109;IPR036969	XP_015618050.1	KOG2617;COG0372	EOG0936083W	PF00285	PS00480	PTHR11739	TIGR01793
	TRINITY_DN2724_c0_g1_i7	tr|Q2R339|Q2R339_ORYSJ	Oryza sativa subsp. japonica (Rice)	LOC_Os11g33240, Os11g0538900 OsJ_34145	OrderedLocusNames=LOC_Os11g33240 {ECO:0000313|EMBL:ABA94101.1}, Os11g0538900 {ECO:0000313|EMBL:BAF28394.1}; ORFNames=OsJ_34145 {ECO:0000313|EMBL:EAZ18623.1};	Q2R339_ORYSJ	Q2R339	Citrate synthase	RecName: Full=Citrate synthase {ECO:0000256|RuleBase:RU000441};	osa:4350660	IPR016142;IPR002020;IPR019810;IPR010109;IPR036969	XP_015618050.1	KOG2617;COG0372	EOG0936083W	PF00285	PS00480	PTHR11739	TIGR01793
	TRINITY_DN2724_c0_g1_i5	tr|Q2R339|Q2R339_ORYSJ	Oryza sativa subsp. japonica (Rice)	LOC_Os11g33240, Os11g0538900 OsJ_34145	OrderedLocusNames=LOC_Os11g33240 {ECO:0000313|EMBL:ABA94101.1}, Os11g0538900 {ECO:0000313|EMBL:BAF28394.1}; ORFNames=OsJ_34145 {ECO:0000313|EMBL:EAZ18623.1};	Q2R339_ORYSJ	Q2R339	Citrate synthase	RecName: Full=Citrate synthase {ECO:0000256|RuleBase:RU000441};	osa:4350660	IPR016142;IPR002020;IPR019810;IPR010109;IPR036969	XP_015618050.1	KOG2617;COG0372	EOG0936083W	PF00285	PS00480	PTHR11739	TIGR01793
	TRINITY_DN2724_c0_g1_i10	tr|Q2R339|Q2R339_ORYSJ	Oryza sativa subsp. japonica (Rice)	LOC_Os11g33240, Os11g0538900 OsJ_34145	OrderedLocusNames=LOC_Os11g33240 {ECO:0000313|EMBL:ABA94101.1}, Os11g0538900 {ECO:0000313|EMBL:BAF28394.1}; ORFNames=OsJ_34145 {ECO:0000313|EMBL:EAZ18623.1};	Q2R339_ORYSJ	Q2R339	Citrate synthase	RecName: Full=Citrate synthase {ECO:0000256|RuleBase:RU000441};	osa:4350660	IPR016142;IPR002020;IPR019810;IPR010109;IPR036969	XP_015618050.1	KOG2617;COG0372	EOG0936083W	PF00285	PS00480	PTHR11739	TIGR01793
	TRINITY_DN2724_c0_g1_i2	tr|Q2R339|Q2R339_ORYSJ	Oryza sativa subsp. japonica (Rice)	LOC_Os11g33240, Os11g0538900 OsJ_34145	OrderedLocusNames=LOC_Os11g33240 {ECO:0000313|EMBL:ABA94101.1}, Os11g0538900 {ECO:0000313|EMBL:BAF28394.1}; ORFNames=OsJ_34145 {ECO:0000313|EMBL:EAZ18623.1};	Q2R339_ORYSJ	Q2R339	Citrate synthase	RecName: Full=Citrate synthase {ECO:0000256|RuleBase:RU000441};	osa:4350660	IPR016142;IPR002020;IPR019810;IPR010109;IPR036969	XP_015618050.1	KOG2617;COG0372	EOG0936083W	PF00285	PS00480	PTHR11739	TIGR01793
	TRINITY_DN2721_c0_g1_i2	tr|I1IT17|I1IT17_BRADI	Brachypodium distachyon (Purple false brome) (Trachynia distachya)	LOC100835265 BRADI_1g68940, BRADI_4g38540	Name=LOC100835265 {ECO:0000313|EnsemblPlants:BRADI4G38540.1}; ORFNames=BRADI_1g68940 {ECO:0000313|EMBL:KQK22710.1}, BRADI_4g38540 {ECO:0000313|EMBL:KQJ91591.1};	I1IT17_BRADI	I1IT17	Uncharacterized protein	SubName: Full=Uncharacterized protein {ECO:0000313|EMBL:KQJ91591.1, ECO:0000313|EnsemblPlants:BRADI4G38540.1};	bdi:100828943;bdi:100835265	IPR001975;IPR011332;IPR019956;IPR029071;IPR019954;IPR000626	XP_003558419.1;XP_003578682.1	ENOG410IUNU;COG1552	EOG09360PUP	PF01020;PF00240	PS00299;PS50053
	TRINITY_DN2721_c0_g1_i4	tr|I1IT17|I1IT17_BRADI	Brachypodium distachyon (Purple false brome) (Trachynia distachya)	LOC100835265 BRADI_1g68940, BRADI_4g38540	Name=LOC100835265 {ECO:0000313|EnsemblPlants:BRADI4G38540.1}; ORFNames=BRADI_1g68940 {ECO:0000313|EMBL:KQK22710.1}, BRADI_4g38540 {ECO:0000313|EMBL:KQJ91591.1};	I1IT17_BRADI	I1IT17	Uncharacterized protein	SubName: Full=Uncharacterized protein {ECO:0000313|EMBL:KQJ91591.1, ECO:0000313|EnsemblPlants:BRADI4G38540.1};	bdi:100828943;bdi:100835265	IPR001975;IPR011332;IPR019956;IPR029071;IPR019954;IPR000626	XP_003558419.1;XP_003578682.1	ENOG410IUNU;COG1552	EOG09360PUP	PF01020;PF00240	PS00299;PS50053
	TRINITY_DN2721_c0_g1_i8	tr|I1IT17|I1IT17_BRADI	Brachypodium distachyon (Purple false brome) (Trachynia distachya)	LOC100835265 BRADI_1g68940, BRADI_4g38540	Name=LOC100835265 {ECO:0000313|EnsemblPlants:BRADI4G38540.1}; ORFNames=BRADI_1g68940 {ECO:0000313|EMBL:KQK22710.1}, BRADI_4g38540 {ECO:0000313|EMBL:KQJ91591.1};	I1IT17_BRADI	I1IT17	Uncharacterized protein	SubName: Full=Uncharacterized protein {ECO:0000313|EMBL:KQJ91591.1, ECO:0000313|EnsemblPlants:BRADI4G38540.1};	bdi:100828943;bdi:100835265	IPR001975;IPR011332;IPR019956;IPR029071;IPR019954;IPR000626	XP_003558419.1;XP_003578682.1	ENOG410IUNU;COG1552	EOG09360PUP	PF01020;PF00240	PS00299;PS50053
	TRINITY_DN2703_c0_g2_i1	tr|R7S958|R7S958_TREMS	Tremella mesenterica (strain ATCC 24925 / CBS 8224 / DSM 1558 / NBRC 9311 / NRRL Y-6157 / RJB 2259-6) (Jelly fungus)	TREMEDRAFT_46102	ORFNames=TREMEDRAFT_46102 {ECO:0000313|EMBL:EIW65871.1};	R7S958_TREMS	R7S958	40S ribosomal protein S14	SubName: Full=40S ribosomal protein S14 {ECO:0000313|EMBL:EIW65871.1};	tms:TREMEDRAFT_46102	IPR001971;IPR018102;IPR036967	XP_007008283.1			PF00411	PS00054	PTHR11759
	TRINITY_DN2739_c1_g1_i1	tr|B7FRR3|B7FRR3_PHATC	Phaeodactylum tricornutum (strain CCAP 1055/1)	PHATRDRAFT_50701	ORFNames=PHATRDRAFT_50701 {ECO:0000313|EMBL:EEC50354.1};	B7FRR3_PHATC	B7FRR3	Predicted protein	SubName: Full=Predicted protein {ECO:0000313|EMBL:EEC50354.1};	pti:PHATRDRAFT_50701	IPR012340;IPR006032;IPR005680	XP_002177540.1			PF00164	PS00055	PTHR11652	TIGR00982
	TRINITY_DN13418_c0_g2_i7	tr|K3Z7E2|K3Z7E2_SETIT	Setaria italica (Foxtail millet) (Panicum italicum)	LOC101786558 SETIT_022462mg	Name=LOC101786558 {ECO:0000313|EnsemblPlants:Si022462m}; ORFNames=SETIT_022462mg {ECO:0000313|EMBL:KQL16551.1};	K3Z7E2_SETIT	K3Z7E2	Uncharacterized protein	SubName: Full=Uncharacterized protein {ECO:0000313|EMBL:KQL16551.1, ECO:0000313|EnsemblPlants:Si022462m};	sita:101786558	IPR018510;IPR001653	XP_004962721.1	ENOG410IHJB;COG0253	EOG09360IPX	PF01678	PS01326	PTHR31689	TIGR00652
	TRINITY_DN13462_c0_g1_i4	tr|I1HH75|I1HH75_BRADI	Brachypodium distachyon (Purple false brome) (Trachynia distachya)	LOC100834791 BRADI_2g18710	Name=LOC100834791 {ECO:0000313|EnsemblPlants:BRADI2G18710.1}; ORFNames=BRADI_2g18710 {ECO:0000313|EMBL:KQK05209.1};	I1HH75_BRADI	I1HH75	Uncharacterized protein	SubName: Full=Uncharacterized protein {ECO:0000313|EMBL:KQK05209.1, ECO:0000313|EnsemblPlants:BRADI2G18710.1};	bdi:100834791	IPR011042;IPR015943;IPR001680;IPR017986;IPR036322	XP_003568023.1;XP_010231114.1	KOG2055;ENOG410YBWP	EOG093608B9	PF00400	PS50082;PS50294
	TRINITY_DN13462_c0_g1_i2	tr|B4FFH2|B4FFH2_MAIZE	Zea mays (Maize)	100193563 ZEAMMB73_Zm00001d014766	Name=100193563 {ECO:0000313|EnsemblPlants:Zm00001d014766_P001}; ORFNames=ZEAMMB73_Zm00001d014766 {ECO:0000313|EMBL:AQK67148.1};	B4FFH2_MAIZE	B4FFH2	U3 small nucleolar RNA-associated protein 18-like protein	SubName: Full=U3 small nucleolar RNA-associated protein 18-like protein {ECO:0000313|EMBL:AQK67148.1};	zma:100193563	IPR011042;IPR015943;IPR001680;IPR017986;IPR036322	NP_001132144.1;XP_008681157.1	KOG2055;ENOG410YBWP	EOG093608B9	PF00400	PS50082;PS50294
	TRINITY_DN13462_c0_g1_i7	tr|I1HH75|I1HH75_BRADI	Brachypodium distachyon (Purple false brome) (Trachynia distachya)	LOC100834791 BRADI_2g18710	Name=LOC100834791 {ECO:0000313|EnsemblPlants:BRADI2G18710.1}; ORFNames=BRADI_2g18710 {ECO:0000313|EMBL:KQK05209.1};	I1HH75_BRADI	I1HH75	Uncharacterized protein	SubName: Full=Uncharacterized protein {ECO:0000313|EMBL:KQK05209.1, ECO:0000313|EnsemblPlants:BRADI2G18710.1};	bdi:100834791	IPR011042;IPR015943;IPR001680;IPR017986;IPR036322	XP_003568023.1;XP_010231114.1	KOG2055;ENOG410YBWP	EOG093608B9	PF00400	PS50082;PS50294
	TRINITY_DN13462_c0_g1_i1	tr|I1HH75|I1HH75_BRADI	Brachypodium distachyon (Purple false brome) (Trachynia distachya)	LOC100834791 BRADI_2g18710	Name=LOC100834791 {ECO:0000313|EnsemblPlants:BRADI2G18710.1}; ORFNames=BRADI_2g18710 {ECO:0000313|EMBL:KQK05209.1};	I1HH75_BRADI	I1HH75	Uncharacterized protein	SubName: Full=Uncharacterized protein {ECO:0000313|EMBL:KQK05209.1, ECO:0000313|EnsemblPlants:BRADI2G18710.1};	bdi:100834791	IPR011042;IPR015943;IPR001680;IPR017986;IPR036322	XP_003568023.1;XP_010231114.1	KOG2055;ENOG410YBWP	EOG093608B9	PF00400	PS50082;PS50294
	TRINITY_DN13462_c0_g1_i12	tr|K3XW63|K3XW63_SETIT	Setaria italica (Foxtail millet) (Panicum italicum)	LOC101772287 SETIT_006171mg	Name=LOC101772287 {ECO:0000313|EnsemblPlants:Si006171m}; ORFNames=SETIT_006171mg {ECO:0000313|EMBL:KQL12054.1};	K3XW63_SETIT	K3XW63	Uncharacterized protein	SubName: Full=Uncharacterized protein {ECO:0000313|EMBL:KQL12054.1, ECO:0000313|EnsemblPlants:Si006171m};	sita:101772287	IPR011042;IPR015943;IPR001680;IPR017986;IPR036322	XP_004966308.1	KOG2055;ENOG410YBWP	EOG093608B9	PF00400	PS50082;PS50294
	TRINITY_DN13474_c2_g1_i1	tr|I1GVT7|I1GVT7_BRADI	Brachypodium distachyon (Purple false brome) (Trachynia distachya)	BRADI_1g31650	ORFNames=BRADI_1g31650 {ECO:0000313|EMBL:KQK16960.1};	I1GVT7_BRADI	I1GVT7	Uncharacterized protein	SubName: Full=Uncharacterized protein {ECO:0000313|EMBL:KQK16960.1, ECO:0000313|EnsemblPlants:BRADI1G31650.1};	bdi:100824664	IPR000195;IPR035969	XP_010240277.1	KOG1091;ENOG410YX8Z	EOG0936027Q	PF00566	PS50086
	TRINITY_DN13455_c0_g2_i9	tr|K3YTP3|K3YTP3_SETIT	Setaria italica (Foxtail millet) (Panicum italicum)	LOC101768692 SETIT_017639mg	Name=LOC101768692 {ECO:0000313|EnsemblPlants:Si017639m}; ORFNames=SETIT_017639mg {ECO:0000313|EMBL:KQL27732.1};	K3YTP3_SETIT	K3YTP3	L-lactate dehydrogenase	RecName: Full=L-lactate dehydrogenase {ECO:0000256|RuleBase:RU000496}; EC=1.1.1.27 {ECO:0000256|RuleBase:RU000496};	sita:101768692	IPR001557;IPR011304;IPR018177;IPR022383;IPR001236;IPR015955;IPR036291	XP_004951205.1	KOG1495;COG0039	EOG09360DKP	PF02866;PF00056	PS00064		TIGR01771
	TRINITY_DN13455_c0_g2_i6	tr|K3YTP3|K3YTP3_SETIT	Setaria italica (Foxtail millet) (Panicum italicum)	LOC101768692 SETIT_017639mg	Name=LOC101768692 {ECO:0000313|EnsemblPlants:Si017639m}; ORFNames=SETIT_017639mg {ECO:0000313|EMBL:KQL27732.1};	K3YTP3_SETIT	K3YTP3	L-lactate dehydrogenase	RecName: Full=L-lactate dehydrogenase {ECO:0000256|RuleBase:RU000496}; EC=1.1.1.27 {ECO:0000256|RuleBase:RU000496};	sita:101768692	IPR001557;IPR011304;IPR018177;IPR022383;IPR001236;IPR015955;IPR036291	XP_004951205.1	KOG1495;COG0039	EOG09360DKP	PF02866;PF00056	PS00064		TIGR01771
	TRINITY_DN13455_c0_g2_i2	tr|K3YTP3|K3YTP3_SETIT	Setaria italica (Foxtail millet) (Panicum italicum)	LOC101768692 SETIT_017639mg	Name=LOC101768692 {ECO:0000313|EnsemblPlants:Si017639m}; ORFNames=SETIT_017639mg {ECO:0000313|EMBL:KQL27732.1};	K3YTP3_SETIT	K3YTP3	L-lactate dehydrogenase	RecName: Full=L-lactate dehydrogenase {ECO:0000256|RuleBase:RU000496}; EC=1.1.1.27 {ECO:0000256|RuleBase:RU000496};	sita:101768692	IPR001557;IPR011304;IPR018177;IPR022383;IPR001236;IPR015955;IPR036291	XP_004951205.1	KOG1495;COG0039	EOG09360DKP	PF02866;PF00056	PS00064		TIGR01771
	TRINITY_DN13455_c0_g2_i10	tr|K3YTP3|K3YTP3_SETIT	Setaria italica (Foxtail millet) (Panicum italicum)	LOC101768692 SETIT_017639mg	Name=LOC101768692 {ECO:0000313|EnsemblPlants:Si017639m}; ORFNames=SETIT_017639mg {ECO:0000313|EMBL:KQL27732.1};	K3YTP3_SETIT	K3YTP3	L-lactate dehydrogenase	RecName: Full=L-lactate dehydrogenase {ECO:0000256|RuleBase:RU000496}; EC=1.1.1.27 {ECO:0000256|RuleBase:RU000496};	sita:101768692	IPR001557;IPR011304;IPR018177;IPR022383;IPR001236;IPR015955;IPR036291	XP_004951205.1	KOG1495;COG0039	EOG09360DKP	PF02866;PF00056	PS00064		TIGR01771
	TRINITY_DN13455_c0_g2_i7	tr|K3YTP3|K3YTP3_SETIT	Setaria italica (Foxtail millet) (Panicum italicum)	LOC101768692 SETIT_017639mg	Name=LOC101768692 {ECO:0000313|EnsemblPlants:Si017639m}; ORFNames=SETIT_017639mg {ECO:0000313|EMBL:KQL27732.1};	K3YTP3_SETIT	K3YTP3	L-lactate dehydrogenase	RecName: Full=L-lactate dehydrogenase {ECO:0000256|RuleBase:RU000496}; EC=1.1.1.27 {ECO:0000256|RuleBase:RU000496};	sita:101768692	IPR001557;IPR011304;IPR018177;IPR022383;IPR001236;IPR015955;IPR036291	XP_004951205.1	KOG1495;COG0039	EOG09360DKP	PF02866;PF00056	PS00064		TIGR01771
	TRINITY_DN13455_c0_g2_i4	tr|K3YTP3|K3YTP3_SETIT	Setaria italica (Foxtail millet) (Panicum italicum)	LOC101768692 SETIT_017639mg	Name=LOC101768692 {ECO:0000313|EnsemblPlants:Si017639m}; ORFNames=SETIT_017639mg {ECO:0000313|EMBL:KQL27732.1};	K3YTP3_SETIT	K3YTP3	L-lactate dehydrogenase	RecName: Full=L-lactate dehydrogenase {ECO:0000256|RuleBase:RU000496}; EC=1.1.1.27 {ECO:0000256|RuleBase:RU000496};	sita:101768692	IPR001557;IPR011304;IPR018177;IPR022383;IPR001236;IPR015955;IPR036291	XP_004951205.1	KOG1495;COG0039	EOG09360DKP	PF02866;PF00056	PS00064		TIGR01771
	TRINITY_DN13455_c0_g2_i1	tr|K3YTP3|K3YTP3_SETIT	Setaria italica (Foxtail millet) (Panicum italicum)	LOC101768692 SETIT_017639mg	Name=LOC101768692 {ECO:0000313|EnsemblPlants:Si017639m}; ORFNames=SETIT_017639mg {ECO:0000313|EMBL:KQL27732.1};	K3YTP3_SETIT	K3YTP3	L-lactate dehydrogenase	RecName: Full=L-lactate dehydrogenase {ECO:0000256|RuleBase:RU000496}; EC=1.1.1.27 {ECO:0000256|RuleBase:RU000496};	sita:101768692	IPR001557;IPR011304;IPR018177;IPR022383;IPR001236;IPR015955;IPR036291	XP_004951205.1	KOG1495;COG0039	EOG09360DKP	PF02866;PF00056	PS00064		TIGR01771
	TRINITY_DN13455_c0_g2_i3	tr|K3YTP3|K3YTP3_SETIT	Setaria italica (Foxtail millet) (Panicum italicum)	LOC101768692 SETIT_017639mg	Name=LOC101768692 {ECO:0000313|EnsemblPlants:Si017639m}; ORFNames=SETIT_017639mg {ECO:0000313|EMBL:KQL27732.1};	K3YTP3_SETIT	K3YTP3	L-lactate dehydrogenase	RecName: Full=L-lactate dehydrogenase {ECO:0000256|RuleBase:RU000496}; EC=1.1.1.27 {ECO:0000256|RuleBase:RU000496};	sita:101768692	IPR001557;IPR011304;IPR018177;IPR022383;IPR001236;IPR015955;IPR036291	XP_004951205.1	KOG1495;COG0039	EOG09360DKP	PF02866;PF00056	PS00064		TIGR01771
	TRINITY_DN3530_c0_g2_i1	tr|I1IA06|I1IA06_BRADI	Brachypodium distachyon (Purple false brome) (Trachynia distachya)	LOC100833912 BRADI_3g44341	Name=LOC100833912 {ECO:0000313|EnsemblPlants:BRADI3G44340.1}; ORFNames=BRADI_3g44341 {ECO:0000313|EMBL:KQJ99625.1};	I1IA06_BRADI	I1IA06	Uncharacterized protein	SubName: Full=Uncharacterized protein {ECO:0000313|EMBL:KQJ99625.1, ECO:0000313|EnsemblPlants:BRADI3G44340.1};	bdi:100833912	IPR003593;IPR003959;IPR019489;IPR004176;IPR036628;IPR001270;IPR018368;IPR028299;IPR027417;IPR001943	XP_003575035.1	KOG1051;COG0542		PF00004;PF07724;PF02861;PF10431;PF02151	PS00870;PS00871;PS50151
	TRINITY_DN3537_c0_g1_i5	tr|I1H6E7|I1H6E7_BRADI	Brachypodium distachyon (Purple false brome) (Trachynia distachya)	LOC100846138 BRADI_1g65070	Name=LOC100846138 {ECO:0000313|EnsemblPlants:BRADI1G65070.1}; ORFNames=BRADI_1g65070 {ECO:0000313|EMBL:KQK22083.1};	I1H6E7_BRADI	I1H6E7	Uncharacterized protein	SubName: Full=Uncharacterized protein {ECO:0000313|EMBL:KQK22083.1, ECO:0000313|EnsemblPlants:BRADI1G65070.1};	bdi:100846138	IPR005937;IPR035244;IPR003593;IPR003959;IPR003960;IPR027417	XP_003558120.1	KOG0726;COG1222	EOG09360B3H	PF00004	PS00674	PTHR23073:SF42	TIGR01242
	TRINITY_DN3520_c1_g1_i6	tr|K3Y653|K3Y653_SETIT	Setaria italica (Foxtail millet) (Panicum italicum)	LOC101756029 SETIT_009692mg	Name=LOC101756029 {ECO:0000313|EnsemblPlants:Si009692m}; ORFNames=SETIT_009692mg {ECO:0000313|EMBL:KQK99851.1};	K3Y653_SETIT	K3Y653	Uncharacterized protein	SubName: Full=Uncharacterized protein {ECO:0000313|EMBL:KQK99851.1, ECO:0000313|EnsemblPlants:Si009692m};	sita:101756029	IPR007173;IPR016169;IPR016166;IPR036318;IPR016167;IPR010031;IPR010029;IPR006094;IPR016170	XP_004977506.1	KOG4730;COG0277	EOG093605NU	PF04030;PF01565	PS51387	PTHR43762	TIGR01676
	TRINITY_DN3520_c1_g1_i1	tr|K3Y653|K3Y653_SETIT	Setaria italica (Foxtail millet) (Panicum italicum)	LOC101756029 SETIT_009692mg	Name=LOC101756029 {ECO:0000313|EnsemblPlants:Si009692m}; ORFNames=SETIT_009692mg {ECO:0000313|EMBL:KQK99851.1};	K3Y653_SETIT	K3Y653	Uncharacterized protein	SubName: Full=Uncharacterized protein {ECO:0000313|EMBL:KQK99851.1, ECO:0000313|EnsemblPlants:Si009692m};	sita:101756029	IPR007173;IPR016169;IPR016166;IPR036318;IPR016167;IPR010031;IPR010029;IPR006094;IPR016170	XP_004977506.1	KOG4730;COG0277	EOG093605NU	PF04030;PF01565	PS51387	PTHR43762	TIGR01676
	TRINITY_DN3520_c1_g1_i2	tr|K3Y653|K3Y653_SETIT	Setaria italica (Foxtail millet) (Panicum italicum)	LOC101756029 SETIT_009692mg	Name=LOC101756029 {ECO:0000313|EnsemblPlants:Si009692m}; ORFNames=SETIT_009692mg {ECO:0000313|EMBL:KQK99851.1};	K3Y653_SETIT	K3Y653	Uncharacterized protein	SubName: Full=Uncharacterized protein {ECO:0000313|EMBL:KQK99851.1, ECO:0000313|EnsemblPlants:Si009692m};	sita:101756029	IPR007173;IPR016169;IPR016166;IPR036318;IPR016167;IPR010031;IPR010029;IPR006094;IPR016170	XP_004977506.1	KOG4730;COG0277	EOG093605NU	PF04030;PF01565	PS51387	PTHR43762	TIGR01676
	TRINITY_DN3520_c1_g1_i9	tr|K3Y653|K3Y653_SETIT	Setaria italica (Foxtail millet) (Panicum italicum)	LOC101756029 SETIT_009692mg	Name=LOC101756029 {ECO:0000313|EnsemblPlants:Si009692m}; ORFNames=SETIT_009692mg {ECO:0000313|EMBL:KQK99851.1};	K3Y653_SETIT	K3Y653	Uncharacterized protein	SubName: Full=Uncharacterized protein {ECO:0000313|EMBL:KQK99851.1, ECO:0000313|EnsemblPlants:Si009692m};	sita:101756029	IPR007173;IPR016169;IPR016166;IPR036318;IPR016167;IPR010031;IPR010029;IPR006094;IPR016170	XP_004977506.1	KOG4730;COG0277	EOG093605NU	PF04030;PF01565	PS51387	PTHR43762	TIGR01676
	TRINITY_DN3520_c1_g1_i4	tr|K3Y653|K3Y653_SETIT	Setaria italica (Foxtail millet) (Panicum italicum)	LOC101756029 SETIT_009692mg	Name=LOC101756029 {ECO:0000313|EnsemblPlants:Si009692m}; ORFNames=SETIT_009692mg {ECO:0000313|EMBL:KQK99851.1};	K3Y653_SETIT	K3Y653	Uncharacterized protein	SubName: Full=Uncharacterized protein {ECO:0000313|EMBL:KQK99851.1, ECO:0000313|EnsemblPlants:Si009692m};	sita:101756029	IPR007173;IPR016169;IPR016166;IPR036318;IPR016167;IPR010031;IPR010029;IPR006094;IPR016170	XP_004977506.1	KOG4730;COG0277	EOG093605NU	PF04030;PF01565	PS51387	PTHR43762	TIGR01676
	TRINITY_DN3520_c1_g1_i3	tr|K3Y653|K3Y653_SETIT	Setaria italica (Foxtail millet) (Panicum italicum)	LOC101756029 SETIT_009692mg	Name=LOC101756029 {ECO:0000313|EnsemblPlants:Si009692m}; ORFNames=SETIT_009692mg {ECO:0000313|EMBL:KQK99851.1};	K3Y653_SETIT	K3Y653	Uncharacterized protein	SubName: Full=Uncharacterized protein {ECO:0000313|EMBL:KQK99851.1, ECO:0000313|EnsemblPlants:Si009692m};	sita:101756029	IPR007173;IPR016169;IPR016166;IPR036318;IPR016167;IPR010031;IPR010029;IPR006094;IPR016170	XP_004977506.1	KOG4730;COG0277	EOG093605NU	PF04030;PF01565	PS51387	PTHR43762	TIGR01676
	TRINITY_DN3513_c1_g2_i2	tr|I1IIT0|I1IIT0_BRADI	Brachypodium distachyon (Purple false brome) (Trachynia distachya)	LOC100827201 BRADI_4g08430	Name=LOC100827201 {ECO:0000313|EnsemblPlants:BRADI4G08430.1}; ORFNames=BRADI_4g08430 {ECO:0000313|EMBL:KQJ86914.1};	I1IIT0_BRADI	I1IIT0	Polyadenylate-binding protein; PABP	RecName: Full=Polyadenylate-binding protein {ECO:0000256|RuleBase:RU362004}; Short=PABP {ECO:0000256|RuleBase:RU362004};	bdi:100827201	IPR036053;IPR006515;IPR002004;IPR035979;IPR000504;IPR003954	XP_003576878.1	KOG0123;ENOG410XR5X	EOG093606N5	PF00658;PF00076	PS51309;PS50102		TIGR01628
	TRINITY_DN3513_c1_g2_i3	tr|I1IIT0|I1IIT0_BRADI	Brachypodium distachyon (Purple false brome) (Trachynia distachya)	LOC100827201 BRADI_4g08430	Name=LOC100827201 {ECO:0000313|EnsemblPlants:BRADI4G08430.1}; ORFNames=BRADI_4g08430 {ECO:0000313|EMBL:KQJ86914.1};	I1IIT0_BRADI	I1IIT0	Polyadenylate-binding protein; PABP	RecName: Full=Polyadenylate-binding protein {ECO:0000256|RuleBase:RU362004}; Short=PABP {ECO:0000256|RuleBase:RU362004};	bdi:100827201	IPR036053;IPR006515;IPR002004;IPR035979;IPR000504;IPR003954	XP_003576878.1	KOG0123;ENOG410XR5X	EOG093606N5	PF00658;PF00076	PS51309;PS50102		TIGR01628
	TRINITY_DN3513_c1_g2_i1	tr|I1IIT0|I1IIT0_BRADI	Brachypodium distachyon (Purple false brome) (Trachynia distachya)	LOC100827201 BRADI_4g08430	Name=LOC100827201 {ECO:0000313|EnsemblPlants:BRADI4G08430.1}; ORFNames=BRADI_4g08430 {ECO:0000313|EMBL:KQJ86914.1};	I1IIT0_BRADI	I1IIT0	Polyadenylate-binding protein; PABP	RecName: Full=Polyadenylate-binding protein {ECO:0000256|RuleBase:RU362004}; Short=PABP {ECO:0000256|RuleBase:RU362004};	bdi:100827201	IPR036053;IPR006515;IPR002004;IPR035979;IPR000504;IPR003954	XP_003576878.1	KOG0123;ENOG410XR5X	EOG093606N5	PF00658;PF00076	PS51309;PS50102		TIGR01628
	TRINITY_DN3513_c1_g2_i4	tr|I1IIT0|I1IIT0_BRADI	Brachypodium distachyon (Purple false brome) (Trachynia distachya)	LOC100827201 BRADI_4g08430	Name=LOC100827201 {ECO:0000313|EnsemblPlants:BRADI4G08430.1}; ORFNames=BRADI_4g08430 {ECO:0000313|EMBL:KQJ86914.1};	I1IIT0_BRADI	I1IIT0	Polyadenylate-binding protein; PABP	RecName: Full=Polyadenylate-binding protein {ECO:0000256|RuleBase:RU362004}; Short=PABP {ECO:0000256|RuleBase:RU362004};	bdi:100827201	IPR036053;IPR006515;IPR002004;IPR035979;IPR000504;IPR003954	XP_003576878.1	KOG0123;ENOG410XR5X	EOG093606N5	PF00658;PF00076	PS51309;PS50102		TIGR01628
	TRINITY_DN97004_c0_g1_i1	sp|P34118|MVPA_DICDI	Dictyostelium discoideum (Slime mold)	mvpA DDB_G0269156	Name=mvpA; ORFNames=DDB_G0269156;	MVPA_DICDI	P34118	Major vault protein alpha; MVP-alpha	RecName: Full=Major vault protein alpha; Short=MVP-alpha;	ddi:DDB_G0269156	IPR021870;IPR002499	XP_646310.1	ENOG410IF6T;ENOG410ZCU8		PF11978;PF01505	PS51224
	TRINITY_DN97048_c0_g1_i2	tr|A0A067CK23|A0A067CK23_SAPPC	Saprolegnia parasitica (strain CBS 223.65)	SPRG_04754	ORFNames=SPRG_04754 {ECO:0000313|EMBL:KDO30853.1};	A0A067CK23_SAPPC	A0A067CK23	T-complex protein 1	SubName: Full=T-complex protein 1 {ECO:0000313|EMBL:KDO30853.1};	spar:SPRG_04754	IPR012721;IPR017998;IPR002194;IPR002423;IPR037290;IPR027409;IPR027413	XP_012198550.1			PF00118	PS00750	PTHR11353	TIGR02346
	TRINITY_DN97000_c1_g1_i1	tr|I1KQY7|I1KQY7_SOYBN	Glycine max (Soybean) (Glycine hispida)	LOC100815284 GLYMA_08G068100	Name=LOC100815284 {ECO:0000313|EnsemblPlants:GLYMA08G07250.1}; ORFNames=GLYMA_08G068100 {ECO:0000313|EMBL:KRH42088.1};	I1KQY7_SOYBN	I1KQY7	Guanosine nucleotide diphosphate dissociation inhibitor	RecName: Full=Guanosine nucleotide diphosphate dissociation inhibitor {ECO:0000256|RuleBase:RU363124};	gmx:100815284	IPR036188;IPR018203;IPR000806	XP_003531017.1	KOG1439;COG5044	EOG09370ACD	PF00996		PTHR11787
	TRINITY_DN97057_c0_g1_i3	tr|L8H2L6|L8H2L6_ACACA	Acanthamoeba castellanii str. Neff	ACA1_267880	ORFNames=ACA1_267880 {ECO:0000313|EMBL:ELR19487.1};	L8H2L6_ACACA	L8H2L6	Ribosomal protein L22, putative	SubName: Full=Ribosomal protein L22, putative {ECO:0000313|EMBL:ELR19487.1};	acan:ACA1_267880	IPR001063;IPR018260;IPR005721;IPR036394	XP_004341573.1			PF00237	PS00464	PTHR11593	TIGR01038
	TRINITY_DN5697_c0_g1_i42	tr|K3XV61|K3XV61_SETIT	Setaria italica (Foxtail millet) (Panicum italicum)	LOC101756622 SETIT_005818mg	Name=LOC101756622 {ECO:0000313|EnsemblPlants:Si005818m}; ORFNames=SETIT_005818mg {ECO:0000313|EMBL:KQL11238.1};	K3XV61_SETIT	K3XV61	Uncharacterized protein	SubName: Full=Uncharacterized protein {ECO:0000313|EMBL:KQL11238.1, ECO:0000313|EnsemblPlants:Si005818m};	sita:101756622	IPR024977;IPR007319;IPR015943;IPR001680;IPR019775;IPR017986;IPR036322	XP_004965749.1	KOG1539;ENOG410XPJH	EOG093601SQ	PF12894;PF04192;PF00400	PS00678;PS50082;PS50294
	TRINITY_DN5697_c0_g1_i22	tr|K3XV61|K3XV61_SETIT	Setaria italica (Foxtail millet) (Panicum italicum)	LOC101756622 SETIT_005818mg	Name=LOC101756622 {ECO:0000313|EnsemblPlants:Si005818m}; ORFNames=SETIT_005818mg {ECO:0000313|EMBL:KQL11238.1};	K3XV61_SETIT	K3XV61	Uncharacterized protein	SubName: Full=Uncharacterized protein {ECO:0000313|EMBL:KQL11238.1, ECO:0000313|EnsemblPlants:Si005818m};	sita:101756622	IPR024977;IPR007319;IPR015943;IPR001680;IPR019775;IPR017986;IPR036322	XP_004965749.1	KOG1539;ENOG410XPJH	EOG093601SQ	PF12894;PF04192;PF00400	PS00678;PS50082;PS50294
	TRINITY_DN5697_c0_g1_i34	tr|K3XV61|K3XV61_SETIT	Setaria italica (Foxtail millet) (Panicum italicum)	LOC101756622 SETIT_005818mg	Name=LOC101756622 {ECO:0000313|EnsemblPlants:Si005818m}; ORFNames=SETIT_005818mg {ECO:0000313|EMBL:KQL11238.1};	K3XV61_SETIT	K3XV61	Uncharacterized protein	SubName: Full=Uncharacterized protein {ECO:0000313|EMBL:KQL11238.1, ECO:0000313|EnsemblPlants:Si005818m};	sita:101756622	IPR024977;IPR007319;IPR015943;IPR001680;IPR019775;IPR017986;IPR036322	XP_004965749.1	KOG1539;ENOG410XPJH	EOG093601SQ	PF12894;PF04192;PF00400	PS00678;PS50082;PS50294
	TRINITY_DN5697_c0_g1_i38	tr|K3XV61|K3XV61_SETIT	Setaria italica (Foxtail millet) (Panicum italicum)	LOC101756622 SETIT_005818mg	Name=LOC101756622 {ECO:0000313|EnsemblPlants:Si005818m}; ORFNames=SETIT_005818mg {ECO:0000313|EMBL:KQL11238.1};	K3XV61_SETIT	K3XV61	Uncharacterized protein	SubName: Full=Uncharacterized protein {ECO:0000313|EMBL:KQL11238.1, ECO:0000313|EnsemblPlants:Si005818m};	sita:101756622	IPR024977;IPR007319;IPR015943;IPR001680;IPR019775;IPR017986;IPR036322	XP_004965749.1	KOG1539;ENOG410XPJH	EOG093601SQ	PF12894;PF04192;PF00400	PS00678;PS50082;PS50294
	TRINITY_DN5697_c0_g1_i44	tr|K3XV61|K3XV61_SETIT	Setaria italica (Foxtail millet) (Panicum italicum)	LOC101756622 SETIT_005818mg	Name=LOC101756622 {ECO:0000313|EnsemblPlants:Si005818m}; ORFNames=SETIT_005818mg {ECO:0000313|EMBL:KQL11238.1};	K3XV61_SETIT	K3XV61	Uncharacterized protein	SubName: Full=Uncharacterized protein {ECO:0000313|EMBL:KQL11238.1, ECO:0000313|EnsemblPlants:Si005818m};	sita:101756622	IPR024977;IPR007319;IPR015943;IPR001680;IPR019775;IPR017986;IPR036322	XP_004965749.1	KOG1539;ENOG410XPJH	EOG093601SQ	PF12894;PF04192;PF00400	PS00678;PS50082;PS50294
	TRINITY_DN5697_c0_g1_i24	tr|K3XV61|K3XV61_SETIT	Setaria italica (Foxtail millet) (Panicum italicum)	LOC101756622 SETIT_005818mg	Name=LOC101756622 {ECO:0000313|EnsemblPlants:Si005818m}; ORFNames=SETIT_005818mg {ECO:0000313|EMBL:KQL11238.1};	K3XV61_SETIT	K3XV61	Uncharacterized protein	SubName: Full=Uncharacterized protein {ECO:0000313|EMBL:KQL11238.1, ECO:0000313|EnsemblPlants:Si005818m};	sita:101756622	IPR024977;IPR007319;IPR015943;IPR001680;IPR019775;IPR017986;IPR036322	XP_004965749.1	KOG1539;ENOG410XPJH	EOG093601SQ	PF12894;PF04192;PF00400	PS00678;PS50082;PS50294
	TRINITY_DN5667_c0_g2_i1	tr|I1HSW6|I1HSW6_BRADI	Brachypodium distachyon (Purple false brome) (Trachynia distachya)	LOC100837985 BRADI_2g53532	Name=LOC100837985 {ECO:0000313|EnsemblPlants:BRADI2G53532.2}; ORFNames=BRADI_2g53532 {ECO:0000313|EMBL:KQK10356.1};	I1HSW6_BRADI	I1HSW6	Uncharacterized protein	SubName: Full=Uncharacterized protein {ECO:0000313|EMBL:KQK10356.1, ECO:0000313|EnsemblPlants:BRADI2G53532.2};	bdi:100837985	IPR010987;IPR036282;IPR012340;IPR002547	XP_010232494.1	KOG2241;COG0073	EOG09360JO0	PF01588	PS50405;PS50886
	TRINITY_DN98301_c0_g2_i2	tr|I1HC97|I1HC97_BRADI	Brachypodium distachyon (Purple false brome) (Trachynia distachya)	LOC100832230	Name=LOC100832230 {ECO:0000313|EnsemblPlants:BRADI2G03920.1};	I1HC97_BRADI	I1HC97	Uncharacterized protein	SubName: Full=Uncharacterized protein {ECO:0000313|EnsemblPlants:BRADI2G03920.1};	bdi:100832230	IPR001611;IPR003591;IPR032675;IPR013210	XP_003565373.1	KOG0619;COG4886	EOG093601F7	PF13855;PF08263	PS51450
	TRINITY_DN98301_c0_g2_i3	tr|I1HC97|I1HC97_BRADI	Brachypodium distachyon (Purple false brome) (Trachynia distachya)	LOC100832230	Name=LOC100832230 {ECO:0000313|EnsemblPlants:BRADI2G03920.1};	I1HC97_BRADI	I1HC97	Uncharacterized protein	SubName: Full=Uncharacterized protein {ECO:0000313|EnsemblPlants:BRADI2G03920.1};	bdi:100832230	IPR001611;IPR003591;IPR032675;IPR013210	XP_003565373.1	KOG0619;COG4886	EOG093601F7	PF13855;PF08263	PS51450
	TRINITY_DN98389_c0_g1_i1	tr|A0A0D2LIN0|A0A0D2LIN0_9CHLO	Monoraphidium neglectum	MNEG_1646	ORFNames=MNEG_1646 {ECO:0000313|EMBL:KIZ06309.1};	A0A0D2LIN0_9CHLO	A0A0D2LIN0	Gamma-glutamyl hydrolase	SubName: Full=Gamma-glutamyl hydrolase {ECO:0000313|EMBL:KIZ06309.1}; EC=3.4.19.9 {ECO:0000313|EMBL:KIZ06309.1};	mng:MNEG_1646	IPR029062;IPR015527;IPR011697	XP_013905328.1			PF07722	PS51275	PTHR11315
	TRINITY_DN53011_c0_g1_i2	tr|L8HBK6|L8HBK6_ACACA	Acanthamoeba castellanii str. Neff	ACA1_034520	ORFNames=ACA1_034520 {ECO:0000313|EMBL:ELR22607.1};	L8HBK6_ACACA	L8HBK6	Gprotein-coupled receptor, putative	SubName: Full=Gprotein-coupled receptor, putative {ECO:0000313|EMBL:ELR22607.1};	acan:ACA1_034520	IPR000539;IPR017981	XP_004349729.1			PF01534	PS50261
	TRINITY_DN53011_c0_g1_i3	tr|L8HBK6|L8HBK6_ACACA	Acanthamoeba castellanii str. Neff	ACA1_034520	ORFNames=ACA1_034520 {ECO:0000313|EMBL:ELR22607.1};	L8HBK6_ACACA	L8HBK6	Gprotein-coupled receptor, putative	SubName: Full=Gprotein-coupled receptor, putative {ECO:0000313|EMBL:ELR22607.1};	acan:ACA1_034520	IPR000539;IPR017981	XP_004349729.1			PF01534	PS50261
	TRINITY_DN53014_c0_g1_i2	tr|I1HGC1|I1HGC1_BRADI	Brachypodium distachyon (Purple false brome) (Trachynia distachya)	LOC100841831 BRADI_2g16290	Name=LOC100841831 {ECO:0000313|EnsemblPlants:BRADI2G16290.1}; ORFNames=BRADI_2g16290 {ECO:0000313|EMBL:KQK04838.1};	I1HGC1_BRADI	I1HGC1	Chlorophyll a-b binding protein, chloroplastic	RecName: Full=Chlorophyll a-b binding protein, chloroplastic {ECO:0000256|RuleBase:RU363080};	bdi:100841831	IPR001344;IPR022796;IPR023329	XP_010231015.1	ENOG410IU0X;ENOG410ZHBU	EOG09360I0J	PF00504		PTHR21649
	TRINITY_DN53014_c0_g1_i4	tr|I1HGC1|I1HGC1_BRADI	Brachypodium distachyon (Purple false brome) (Trachynia distachya)	LOC100841831 BRADI_2g16290	Name=LOC100841831 {ECO:0000313|EnsemblPlants:BRADI2G16290.1}; ORFNames=BRADI_2g16290 {ECO:0000313|EMBL:KQK04838.1};	I1HGC1_BRADI	I1HGC1	Chlorophyll a-b binding protein, chloroplastic	RecName: Full=Chlorophyll a-b binding protein, chloroplastic {ECO:0000256|RuleBase:RU363080};	bdi:100841831	IPR001344;IPR022796;IPR023329	XP_010231015.1	ENOG410IU0X;ENOG410ZHBU	EOG09360I0J	PF00504		PTHR21649
	TRINITY_DN53014_c0_g1_i3	tr|I1HGC1|I1HGC1_BRADI	Brachypodium distachyon (Purple false brome) (Trachynia distachya)	LOC100841831 BRADI_2g16290	Name=LOC100841831 {ECO:0000313|EnsemblPlants:BRADI2G16290.1}; ORFNames=BRADI_2g16290 {ECO:0000313|EMBL:KQK04838.1};	I1HGC1_BRADI	I1HGC1	Chlorophyll a-b binding protein, chloroplastic	RecName: Full=Chlorophyll a-b binding protein, chloroplastic {ECO:0000256|RuleBase:RU363080};	bdi:100841831	IPR001344;IPR022796;IPR023329	XP_010231015.1	ENOG410IU0X;ENOG410ZHBU	EOG09360I0J	PF00504		PTHR21649
	TRINITY_DN53070_c0_g1_i2	tr|D0NWC6|D0NWC6_PHYIT	Phytophthora infestans (strain T30-4) (Potato late blight fungus)	PITG_17753	ORFNames=PITG_17753 {ECO:0000313|EMBL:EEY66977.1};	D0NWC6_PHYIT	D0NWC6	Malic enzyme	RecName: Full=Malic enzyme {ECO:0000256|RuleBase:RU003426};	pif:PITG_17753	IPR015884;IPR012301;IPR037062;IPR012302;IPR001891;IPR036291	XP_002896607.1			PF00390;PF03949	PS00331
	TRINITY_DN53070_c0_g1_i3	tr|D0NWC6|D0NWC6_PHYIT	Phytophthora infestans (strain T30-4) (Potato late blight fungus)	PITG_17753	ORFNames=PITG_17753 {ECO:0000313|EMBL:EEY66977.1};	D0NWC6_PHYIT	D0NWC6	Malic enzyme	RecName: Full=Malic enzyme {ECO:0000256|RuleBase:RU003426};	pif:PITG_17753	IPR015884;IPR012301;IPR037062;IPR012302;IPR001891;IPR036291	XP_002896607.1			PF00390;PF03949	PS00331
	TRINITY_DN53098_c0_g1_i3	tr|H6R3P8|H6R3P8_NOCCG	Nocardia cyriacigeorgica (strain GUH-2)	NOCYR_2433	OrderedLocusNames=NOCYR_2433 {ECO:0000313|EMBL:CCF63204.1};	H6R3P8_NOCCG	H6R3P8	Uncharacterized protein	SubName: Full=Uncharacterized protein {ECO:0000313|EMBL:CCF63204.1};	ncy:NOCYR_2433			ENOG4105YNI;ENOG41125ZN	POG091H0BDN
	TRINITY_DN53098_c0_g1_i13	tr|H6R3P8|H6R3P8_NOCCG	Nocardia cyriacigeorgica (strain GUH-2)	NOCYR_2433	OrderedLocusNames=NOCYR_2433 {ECO:0000313|EMBL:CCF63204.1};	H6R3P8_NOCCG	H6R3P8	Uncharacterized protein	SubName: Full=Uncharacterized protein {ECO:0000313|EMBL:CCF63204.1};	ncy:NOCYR_2433			ENOG4105YNI;ENOG41125ZN	POG091H0BDN
	TRINITY_DN53098_c0_g1_i15	tr|H6R3P8|H6R3P8_NOCCG	Nocardia cyriacigeorgica (strain GUH-2)	NOCYR_2433	OrderedLocusNames=NOCYR_2433 {ECO:0000313|EMBL:CCF63204.1};	H6R3P8_NOCCG	H6R3P8	Uncharacterized protein	SubName: Full=Uncharacterized protein {ECO:0000313|EMBL:CCF63204.1};	ncy:NOCYR_2433			ENOG4105YNI;ENOG41125ZN	POG091H0BDN
	TRINITY_DN53098_c0_g1_i6	tr|H6R3P8|H6R3P8_NOCCG	Nocardia cyriacigeorgica (strain GUH-2)	NOCYR_2433	OrderedLocusNames=NOCYR_2433 {ECO:0000313|EMBL:CCF63204.1};	H6R3P8_NOCCG	H6R3P8	Uncharacterized protein	SubName: Full=Uncharacterized protein {ECO:0000313|EMBL:CCF63204.1};	ncy:NOCYR_2433			ENOG4105YNI;ENOG41125ZN	POG091H0BDN
	TRINITY_DN53098_c0_g1_i14	tr|H6R3P8|H6R3P8_NOCCG	Nocardia cyriacigeorgica (strain GUH-2)	NOCYR_2433	OrderedLocusNames=NOCYR_2433 {ECO:0000313|EMBL:CCF63204.1};	H6R3P8_NOCCG	H6R3P8	Uncharacterized protein	SubName: Full=Uncharacterized protein {ECO:0000313|EMBL:CCF63204.1};	ncy:NOCYR_2433			ENOG4105YNI;ENOG41125ZN	POG091H0BDN
	TRINITY_DN53098_c0_g1_i1	tr|H6R3P8|H6R3P8_NOCCG	Nocardia cyriacigeorgica (strain GUH-2)	NOCYR_2433	OrderedLocusNames=NOCYR_2433 {ECO:0000313|EMBL:CCF63204.1};	H6R3P8_NOCCG	H6R3P8	Uncharacterized protein	SubName: Full=Uncharacterized protein {ECO:0000313|EMBL:CCF63204.1};	ncy:NOCYR_2433			ENOG4105YNI;ENOG41125ZN	POG091H0BDN
	TRINITY_DN53098_c0_g1_i8	tr|H6R3P8|H6R3P8_NOCCG	Nocardia cyriacigeorgica (strain GUH-2)	NOCYR_2433	OrderedLocusNames=NOCYR_2433 {ECO:0000313|EMBL:CCF63204.1};	H6R3P8_NOCCG	H6R3P8	Uncharacterized protein	SubName: Full=Uncharacterized protein {ECO:0000313|EMBL:CCF63204.1};	ncy:NOCYR_2433			ENOG4105YNI;ENOG41125ZN	POG091H0BDN
	TRINITY_DN51189_c0_g1_i2	tr|A0A0F6Z379|A0A0F6Z379_9PROT	Sulfurovum lithotrophicum	YH65_09280	ORFNames=YH65_09280 {ECO:0000313|EMBL:AKF25546.1};	A0A0F6Z379_9PROT	A0A0F6Z379	Heat-shock protein Hsp20	SubName: Full=Heat-shock protein Hsp20 {ECO:0000313|EMBL:AKF25546.1};	slh:YH65_09280	IPR002068;IPR008978	WP_046551616.1			PF00011	PS01031
	TRINITY_DN51147_c0_g1_i5	tr|I1ILA1|I1ILA1_BRADI	Brachypodium distachyon (Purple false brome) (Trachynia distachya)	LOC100823202 BRADI_4g16820	Name=LOC100823202 {ECO:0000313|EnsemblPlants:BRADI4G16820.1}; ORFNames=BRADI_4g16820 {ECO:0000313|EMBL:KQJ88289.1};	I1ILA1_BRADI	I1ILA1	Uncharacterized protein	SubName: Full=Uncharacterized protein {ECO:0000313|EMBL:KQJ88289.1, ECO:0000313|EnsemblPlants:BRADI4G16820.1};	bdi:100823202	IPR009361	XP_003577491.1	KOG2163;ENOG410XQ7J	EOG09360595	PF06248
	TRINITY_DN51147_c0_g1_i4	tr|I1ILA1|I1ILA1_BRADI	Brachypodium distachyon (Purple false brome) (Trachynia distachya)	LOC100823202 BRADI_4g16820	Name=LOC100823202 {ECO:0000313|EnsemblPlants:BRADI4G16820.1}; ORFNames=BRADI_4g16820 {ECO:0000313|EMBL:KQJ88289.1};	I1ILA1_BRADI	I1ILA1	Uncharacterized protein	SubName: Full=Uncharacterized protein {ECO:0000313|EMBL:KQJ88289.1, ECO:0000313|EnsemblPlants:BRADI4G16820.1};	bdi:100823202	IPR009361	XP_003577491.1	KOG2163;ENOG410XQ7J	EOG09360595	PF06248
	TRINITY_DN51147_c0_g1_i2	tr|I1ILA1|I1ILA1_BRADI	Brachypodium distachyon (Purple false brome) (Trachynia distachya)	LOC100823202 BRADI_4g16820	Name=LOC100823202 {ECO:0000313|EnsemblPlants:BRADI4G16820.1}; ORFNames=BRADI_4g16820 {ECO:0000313|EMBL:KQJ88289.1};	I1ILA1_BRADI	I1ILA1	Uncharacterized protein	SubName: Full=Uncharacterized protein {ECO:0000313|EMBL:KQJ88289.1, ECO:0000313|EnsemblPlants:BRADI4G16820.1};	bdi:100823202	IPR009361	XP_003577491.1	KOG2163;ENOG410XQ7J	EOG09360595	PF06248
	TRINITY_DN51147_c0_g1_i3	tr|I1ILA1|I1ILA1_BRADI	Brachypodium distachyon (Purple false brome) (Trachynia distachya)	LOC100823202 BRADI_4g16820	Name=LOC100823202 {ECO:0000313|EnsemblPlants:BRADI4G16820.1}; ORFNames=BRADI_4g16820 {ECO:0000313|EMBL:KQJ88289.1};	I1ILA1_BRADI	I1ILA1	Uncharacterized protein	SubName: Full=Uncharacterized protein {ECO:0000313|EMBL:KQJ88289.1, ECO:0000313|EnsemblPlants:BRADI4G16820.1};	bdi:100823202	IPR009361	XP_003577491.1	KOG2163;ENOG410XQ7J	EOG09360595	PF06248
	TRINITY_DN51175_c1_g1_i2	tr|A0A1S2XHQ9|A0A1S2XHQ9_CICAR	Cicer arietinum (Chickpea) (Garbanzo)	LOC101515489 LOC101488243	Name=LOC101515489 {ECO:0000313|RefSeq:XP_004489551.1}; Synonyms=LOC101488243 {ECO:0000313|RefSeq:XP_004489552.1};	A0A1S2XHQ9_CICAR	A0A1S2XHQ9	Elongation factor 1-alpha	RecName: Full=Elongation factor 1-alpha {ECO:0000256|RuleBase:RU000325};	cam:101488243;cam:101515489	IPR004161;IPR031157;IPR027417;IPR000795;IPR009000;IPR009001;IPR004539;IPR004160	XP_004489551.1;XP_004489552.1			PF00009;PF03144;PF03143	PS00301;PS51722		TIGR00483
	TRINITY_DN51175_c1_g1_i1	tr|A0A1S2XHQ9|A0A1S2XHQ9_CICAR	Cicer arietinum (Chickpea) (Garbanzo)	LOC101515489 LOC101488243	Name=LOC101515489 {ECO:0000313|RefSeq:XP_004489551.1}; Synonyms=LOC101488243 {ECO:0000313|RefSeq:XP_004489552.1};	A0A1S2XHQ9_CICAR	A0A1S2XHQ9	Elongation factor 1-alpha	RecName: Full=Elongation factor 1-alpha {ECO:0000256|RuleBase:RU000325};	cam:101488243;cam:101515489	IPR004161;IPR031157;IPR027417;IPR000795;IPR009000;IPR009001;IPR004539;IPR004160	XP_004489551.1;XP_004489552.1			PF00009;PF03144;PF03143	PS00301;PS51722		TIGR00483
	TRINITY_DN82057_c0_g1_i2	sp|Q8H1E2|MDHNP_ARATH	Arabidopsis thaliana (Mouse-ear cress)	At5g58330	OrderedLocusNames=At5g58330 {ECO:0000312|Araport:AT5G58330};	MDHNP_ARATH	Q8H1E2	Malate dehydrogenase [NADP], chloroplastic; NADP-MDH	RecName: Full=Malate dehydrogenase [NADP], chloroplastic {ECO:0000305}; EC=1.1.1.82 {ECO:0000305}; AltName: Full=NADP-MDH {ECO:0000305}; Flags: Precursor;	ath:AT5G58330	IPR022383;IPR001236;IPR015955;IPR001252;IPR011273;IPR010945;IPR036291	NP_568875.2;NP_851214.1	KOG1496;COG0039	EOG09360AEK	PF02866;PF00056	PS00068	PTHR23382	TIGR01757;TIGR01759
	TRINITY_DN82057_c0_g1_i1	sp|Q8H1E2|MDHNP_ARATH	Arabidopsis thaliana (Mouse-ear cress)	At5g58330	OrderedLocusNames=At5g58330 {ECO:0000312|Araport:AT5G58330};	MDHNP_ARATH	Q8H1E2	Malate dehydrogenase [NADP], chloroplastic; NADP-MDH	RecName: Full=Malate dehydrogenase [NADP], chloroplastic {ECO:0000305}; EC=1.1.1.82 {ECO:0000305}; AltName: Full=NADP-MDH {ECO:0000305}; Flags: Precursor;	ath:AT5G58330	IPR022383;IPR001236;IPR015955;IPR001252;IPR011273;IPR010945;IPR036291	NP_568875.2;NP_851214.1	KOG1496;COG0039	EOG09360AEK	PF02866;PF00056	PS00068	PTHR23382	TIGR01757;TIGR01759
	TRINITY_DN82075_c0_g1_i1	tr|A0A067CPH3|A0A067CPH3_SAPPC	Saprolegnia parasitica (strain CBS 223.65)	SPRG_06526	ORFNames=SPRG_06526 {ECO:0000313|EMBL:KDO28672.1};	A0A067CPH3_SAPPC	A0A067CPH3	Uncharacterized protein	SubName: Full=Uncharacterized protein {ECO:0000313|EMBL:KDO28672.1};	spar:SPRG_06526	IPR000717;IPR035298;IPR036388;IPR036390	XP_012200731.1			PF01399		PTHR10539
	TRINITY_DN82075_c0_g1_i2	tr|A0A067CPH3|A0A067CPH3_SAPPC	Saprolegnia parasitica (strain CBS 223.65)	SPRG_06526	ORFNames=SPRG_06526 {ECO:0000313|EMBL:KDO28672.1};	A0A067CPH3_SAPPC	A0A067CPH3	Uncharacterized protein	SubName: Full=Uncharacterized protein {ECO:0000313|EMBL:KDO28672.1};	spar:SPRG_06526	IPR000717;IPR035298;IPR036388;IPR036390	XP_012200731.1			PF01399		PTHR10539
	TRINITY_DN25853_c1_g1_i1	tr|Q7EZR6|Q7EZR6_ORYSJ	Oryza sativa subsp. japonica (Rice)	P0582D05.131 Os08g0130600 OSJNBb0009H02.1, OSNPB_080130600	Name=P0582D05.131 {ECO:0000313|EMBL:BAD09643.1}; OrderedLocusNames=Os08g0130600 {ECO:0000313|EMBL:BAF22838.1}; ORFNames=OSJNBb0009H02.1 {ECO:0000313|EMBL:BAD33364.1}, OSNPB_080130600 {ECO:0000313|EMBL:BAT03698.1};	Q7EZR6_ORYSJ	Q7EZR6	Os08g0130600 protein; Putative non-phototropic hypocotyl 3 (NPH3)/phototropic response protein	SubName: Full=Os08g0130600 protein {ECO:0000313|EMBL:BAF22838.1}; SubName: Full=Putative non-phototropic hypocotyl 3 (NPH3)/phototropic response protein {ECO:0000313|EMBL:BAD09643.1};	osa:4344591	IPR000210;IPR027356;IPR011333	XP_015650254.1	ENOG410JW30;ENOG41105BC	EOG09360598	PF00651;PF03000	PS50097;PS51649
	TRINITY_DN25830_c0_g1_i1	sp|Q6Z517|SMAX1_ORYSJ	Oryza sativa subsp. japonica (Rice)	SMAX1L Os08g0250900, LOC_Os08g15230 OSJNBa0036E18.7, OSNPB_080250900	Name=SMAX1L {ECO:0000305}; OrderedLocusNames=Os08g0250900 {ECO:0000312|EMBL:BAF23290.1}, LOC_Os08g15230 {ECO:0000305}; ORFNames=OSJNBa0036E18.7 {ECO:0000312|EMBL:BAD05509.1}, OSNPB_080250900 {ECO:0000312|EMBL:BAT04561.1};	SMAX1_ORYSJ	Q6Z517	Protein SMAX1-like	RecName: Full=Protein SMAX1-like {ECO:0000305};	osa:4345082	IPR004176;IPR036628;IPR027417	XP_015650285.1	KOG1051;COG0542	EOG0936016Y	PF02861
	TRINITY_DN25830_c0_g1_i2	sp|Q6Z517|SMAX1_ORYSJ	Oryza sativa subsp. japonica (Rice)	SMAX1L Os08g0250900, LOC_Os08g15230 OSJNBa0036E18.7, OSNPB_080250900	Name=SMAX1L {ECO:0000305}; OrderedLocusNames=Os08g0250900 {ECO:0000312|EMBL:BAF23290.1}, LOC_Os08g15230 {ECO:0000305}; ORFNames=OSJNBa0036E18.7 {ECO:0000312|EMBL:BAD05509.1}, OSNPB_080250900 {ECO:0000312|EMBL:BAT04561.1};	SMAX1_ORYSJ	Q6Z517	Protein SMAX1-like	RecName: Full=Protein SMAX1-like {ECO:0000305};	osa:4345082	IPR004176;IPR036628;IPR027417	XP_015650285.1	KOG1051;COG0542	EOG0936016Y	PF02861
	TRINITY_DN7829_c0_g1_i8	tr|I1HF00|I1HF00_BRADI	Brachypodium distachyon (Purple false brome) (Trachynia distachya)	LOC100841324 BRADI_2g12020	Name=LOC100841324 {ECO:0000313|EnsemblPlants:BRADI2G12020.1}; ORFNames=BRADI_2g12020 {ECO:0000313|EMBL:KQK04155.1};	I1HF00_BRADI	I1HF00	Uncharacterized protein	SubName: Full=Uncharacterized protein {ECO:0000313|EMBL:KQK04155.1, ECO:0000313|EnsemblPlants:BRADI2G12020.1};	bdi:100841324	IPR029058;IPR000073;IPR022742	XP_003567617.1	KOG1455;COG2267	EOG09360EEU	PF12146
	TRINITY_DN85268_c0_g1_i2	tr|I1IAZ5|I1IAZ5_BRADI	Brachypodium distachyon (Purple false brome) (Trachynia distachya)	LOC100844489 BRADI_3g47127	Name=LOC100844489 {ECO:0000313|EnsemblPlants:BRADI3G47127.1}; ORFNames=BRADI_3g47127 {ECO:0000313|EMBL:KQK00066.1};	I1IAZ5_BRADI	I1IAZ5	Uncharacterized protein	SubName: Full=Uncharacterized protein {ECO:0000313|EMBL:KQK00066.1, ECO:0000313|EnsemblPlants:BRADI3G47127.1};	bdi:100844489		XP_010235604.1;XP_010235605.1	ENOG410J49M;ENOG410Y52I	EOG093607G2
	TRINITY_DN85268_c0_g1_i1	tr|I1IAZ5|I1IAZ5_BRADI	Brachypodium distachyon (Purple false brome) (Trachynia distachya)	LOC100844489 BRADI_3g47127	Name=LOC100844489 {ECO:0000313|EnsemblPlants:BRADI3G47127.1}; ORFNames=BRADI_3g47127 {ECO:0000313|EMBL:KQK00066.1};	I1IAZ5_BRADI	I1IAZ5	Uncharacterized protein	SubName: Full=Uncharacterized protein {ECO:0000313|EMBL:KQK00066.1, ECO:0000313|EnsemblPlants:BRADI3G47127.1};	bdi:100844489		XP_010235604.1;XP_010235605.1	ENOG410J49M;ENOG410Y52I	EOG093607G2
	TRINITY_DN85226_c0_g1_i2	tr|Q581R9|Q581R9_TRYB2	Trypanosoma brucei brucei (strain 927/4 GUTat10.1)	Tb927.4.1620	ORFNames=Tb927.4.1620 {ECO:0000313|EMBL:AAX79901.1};	Q581R9_TRYB2	Q581R9	Phosphatidylinositol 4-phosphate 5-kinase alpha, putative	SubName: Full=Phosphatidylinositol 4-phosphate 5-kinase alpha, putative {ECO:0000313|EMBL:AAX79901.1};	tbr:Tb927.4.1620	IPR023610;IPR027483;IPR002498;IPR027484	XP_844312.1			PF01504	PS51455	PTHR23086
	TRINITY_DN85226_c0_g1_i1	tr|Q581R9|Q581R9_TRYB2	Trypanosoma brucei brucei (strain 927/4 GUTat10.1)	Tb927.4.1620	ORFNames=Tb927.4.1620 {ECO:0000313|EMBL:AAX79901.1};	Q581R9_TRYB2	Q581R9	Phosphatidylinositol 4-phosphate 5-kinase alpha, putative	SubName: Full=Phosphatidylinositol 4-phosphate 5-kinase alpha, putative {ECO:0000313|EMBL:AAX79901.1};	tbr:Tb927.4.1620	IPR023610;IPR027483;IPR002498;IPR027484	XP_844312.1			PF01504	PS51455	PTHR23086
	TRINITY_DN85240_c1_g2_i1	tr|M2SMZ1|M2SMZ1_COCSN	Cochliobolus sativus (strain ND90Pr / ATCC 201652) (Common root rot and spot blotch fungus) (Bipolaris sorokiniana)	COCSADRAFT_134370	ORFNames=COCSADRAFT_134370 {ECO:0000313|EMBL:EMD68533.1};	M2SMZ1_COCSN	M2SMZ1	Uncharacterized protein	SubName: Full=Uncharacterized protein {ECO:0000313|EMBL:EMD68533.1};	bsc:COCSADRAFT_134370	IPR001848;IPR027486;IPR036838;IPR005729	XP_007696108.1		EOG092C5OAL	PF00338		PTHR11700	TIGR01046
	TRINITY_DN15993_c1_g1_i1	tr|I1IQP0|I1IQP0_BRADI	Brachypodium distachyon (Purple false brome) (Trachynia distachya)	LOC100842390 BRADI_4g31960	Name=LOC100842390 {ECO:0000313|EnsemblPlants:BRADI4G31960.1}; ORFNames=BRADI_4g31960 {ECO:0000313|EMBL:KQJ90496.1};	I1IQP0_BRADI	I1IQP0	Uncharacterized protein	SubName: Full=Uncharacterized protein {ECO:0000313|EMBL:KQJ90496.1, ECO:0000313|EnsemblPlants:BRADI4G31960.1};	bdi:100842390	IPR004839;IPR015424;IPR015421;IPR015422	XP_003578218.1	KOG0257;COG0436	EOG09360B0O	PF00155
	TRINITY_DN32537_c0_g1_i1	tr|A0A1S2XTT7|A0A1S2XTT7_CICAR	Cicer arietinum (Chickpea) (Garbanzo)	LOC101494880	Name=LOC101494880 {ECO:0000313|RefSeq:XP_004493886.1};	A0A1S2XTT7_CICAR	A0A1S2XTT7	heat shock cognate 70 kDa protein 2-like	SubName: Full=heat shock cognate 70 kDa protein 2-like {ECO:0000313|RefSeq:XP_004493886.1};	cam:101494880	IPR018181;IPR029048;IPR029047;IPR013126	XP_004493886.1			PF00012	PS00297;PS00329;PS01036
	TRINITY_DN30430_c0_g1_i2	tr|A0A1Y0GCU1|A0A1Y0GCU1_9PROT	Sulfuriferula sp. AH1	CAP31_13570	ORFNames=CAP31_13570 {ECO:0000313|EMBL:ARU32975.1};	A0A1Y0GCU1_9PROT	A0A1Y0GCU1	Uncharacterized protein	SubName: Full=Uncharacterized protein {ECO:0000313|EMBL:ARU32975.1};	sulf:CAP31_13570
	TRINITY_DN30499_c0_g1_i16	tr|A0A0K2GA89|A0A0K2GA89_NITMO	Nitrospira moscoviensis	NITMOv2_1361	ORFNames=NITMOv2_1361 {ECO:0000313|EMBL:ALA57789.1};	A0A0K2GA89_NITMO	A0A0K2GA89	Uncharacterized protein	SubName: Full=Uncharacterized protein {ECO:0000313|EMBL:ALA57789.1};	nmv:NITMOv2_1361
	TRINITY_DN30499_c0_g1_i11	tr|Q8CM04|Q8CM04_COREF	Corynebacterium efficiens (strain DSM 44549 / YS-314 / AJ 12310 / JCM 11189 / NBRC 100395)			Q8CM04_COREF	Q8CM04	Uncharacterized protein	SubName: Full=Uncharacterized protein {ECO:0000313|EMBL:BAC18353.1};	cef:CE1543				POG091H113U
	TRINITY_DN30498_c1_g1_i1	tr|A0A1S2YJA9|A0A1S2YJA9_CICAR	Cicer arietinum (Chickpea) (Garbanzo)	LOC101495574	Name=LOC101495574 {ECO:0000313|RefSeq:XP_004505621.1};	A0A1S2YJA9_CICAR	A0A1S2YJA9	cyclin-B1-2-like isoform X2	SubName: Full=cyclin-B1-2-like isoform X2 {ECO:0000313|RefSeq:XP_004505621.1};	cam:101495574	IPR008012	XP_004505621.1					PTHR12828
	TRINITY_DN30482_c0_g1_i3	tr|K3XXX2|K3XXX2_SETIT	Setaria italica (Foxtail millet) (Panicum italicum)	LOC101773365 SETIT_006780mg	Name=LOC101773365 {ECO:0000313|EnsemblPlants:Si006780m}; ORFNames=SETIT_006780mg {ECO:0000313|EMBL:KQL11052.1};	K3XXX2_SETIT	K3XXX2	Uncharacterized protein	SubName: Full=Uncharacterized protein {ECO:0000313|EMBL:KQL11052.1, ECO:0000313|EnsemblPlants:Si006780m};	sita:101773365	IPR005045	XP_004965627.1	KOG2952;COG5035	EOG09360FGO	PF03381		PTHR10926
	TRINITY_DN30472_c0_g1_i1	tr|I1HLT6|I1HLT6_BRADI	Brachypodium distachyon (Purple false brome) (Trachynia distachya)	LOC100824498 BRADI_2g35820	Name=LOC100824498 {ECO:0000313|EnsemblPlants:BRADI2G35820.1}; ORFNames=BRADI_2g35820 {ECO:0000313|EMBL:KQK07498.1};	I1HLT6_BRADI	I1HLT6	Uncharacterized protein	SubName: Full=Uncharacterized protein {ECO:0000313|EMBL:KQK07498.1, ECO:0000313|EnsemblPlants:BRADI2G35820.1};	bdi:100824498	IPR016157;IPR016158;IPR036317;IPR001373;IPR019559;IPR016159;IPR036388;IPR036390	XP_003568930.1	KOG2166;COG5647	EOG093603S8	PF00888;PF10557	PS01256;PS50069
	TRINITY_DN47675_c0_g1_i1	tr|I1GNH7|I1GNH7_BRADI	Brachypodium distachyon (Purple false brome) (Trachynia distachya)	LOC100821974 BRADI_1g09200	Name=LOC100821974 {ECO:0000313|EnsemblPlants:BRADI1G09200.1}; ORFNames=BRADI_1g09200 {ECO:0000313|EMBL:KQK13297.1};	I1GNH7_BRADI	I1GNH7	Uncharacterized protein	SubName: Full=Uncharacterized protein {ECO:0000313|EMBL:KQK13297.1, ECO:0000313|EnsemblPlants:BRADI1G09200.1};	bdi:100821974	IPR006768;IPR006767;IPR036265	XP_003559912.1	KOG2477;ENOG410YGTC	EOG093604TP	PF04677;PF04676
	TRINITY_DN47674_c0_g1_i3	tr|B6SV61|B6SV61_MAIZE	Zea mays (Maize)	100281413 ZEAMMB73_Zm00001d052323	Name=100281413 {ECO:0000313|EnsemblPlants:Zm00001d052323_P001}; ORFNames=ZEAMMB73_Zm00001d052323 {ECO:0000313|EMBL:AQK56946.1};	B6SV61_MAIZE	B6SV61	Brassinosteroid LRR receptor kinase; Meristematic receptor-like kinase	SubName: Full=Brassinosteroid LRR receptor kinase {ECO:0000313|EMBL:ACG28744.1}; SubName: Full=Meristematic receptor-like kinase {ECO:0000313|EMBL:AQK56946.1};	zma:100281413	IPR011009;IPR001611;IPR032675;IPR013210;IPR000719;IPR001245	NP_001147803.1	ENOG410IHIJ;COG0515	EOG0936049J	PF13855;PF08263;PF07714	PS50011
	TRINITY_DN47674_c0_g1_i5	tr|B6SV61|B6SV61_MAIZE	Zea mays (Maize)	100281413 ZEAMMB73_Zm00001d052323	Name=100281413 {ECO:0000313|EnsemblPlants:Zm00001d052323_P001}; ORFNames=ZEAMMB73_Zm00001d052323 {ECO:0000313|EMBL:AQK56946.1};	B6SV61_MAIZE	B6SV61	Brassinosteroid LRR receptor kinase; Meristematic receptor-like kinase	SubName: Full=Brassinosteroid LRR receptor kinase {ECO:0000313|EMBL:ACG28744.1}; SubName: Full=Meristematic receptor-like kinase {ECO:0000313|EMBL:AQK56946.1};	zma:100281413	IPR011009;IPR001611;IPR032675;IPR013210;IPR000719;IPR001245	NP_001147803.1	ENOG410IHIJ;COG0515	EOG0936049J	PF13855;PF08263;PF07714	PS50011
	TRINITY_DN36266_c0_g1_i5	tr|B7GD43|B7GD43_PHATC	Phaeodactylum tricornutum (strain CCAP 1055/1)	PHATRDRAFT_50149	ORFNames=PHATRDRAFT_50149 {ECO:0000313|EMBL:EEC43512.1};	B7GD43_PHATC	B7GD43	Amino acid transporter	RecName: Full=Amino acid transporter {ECO:0000256|RuleBase:RU361216};	pti:PHATRDRAFT_50149	IPR036458;IPR001991	XP_002185065.1			PF00375
	TRINITY_DN36266_c0_g1_i8	tr|B7GD43|B7GD43_PHATC	Phaeodactylum tricornutum (strain CCAP 1055/1)	PHATRDRAFT_50149	ORFNames=PHATRDRAFT_50149 {ECO:0000313|EMBL:EEC43512.1};	B7GD43_PHATC	B7GD43	Amino acid transporter	RecName: Full=Amino acid transporter {ECO:0000256|RuleBase:RU361216};	pti:PHATRDRAFT_50149	IPR036458;IPR001991	XP_002185065.1			PF00375
	TRINITY_DN36266_c0_g1_i3	tr|B7GD43|B7GD43_PHATC	Phaeodactylum tricornutum (strain CCAP 1055/1)	PHATRDRAFT_50149	ORFNames=PHATRDRAFT_50149 {ECO:0000313|EMBL:EEC43512.1};	B7GD43_PHATC	B7GD43	Amino acid transporter	RecName: Full=Amino acid transporter {ECO:0000256|RuleBase:RU361216};	pti:PHATRDRAFT_50149	IPR036458;IPR001991	XP_002185065.1			PF00375
	TRINITY_DN36266_c0_g1_i6	tr|B7GD43|B7GD43_PHATC	Phaeodactylum tricornutum (strain CCAP 1055/1)	PHATRDRAFT_50149	ORFNames=PHATRDRAFT_50149 {ECO:0000313|EMBL:EEC43512.1};	B7GD43_PHATC	B7GD43	Amino acid transporter	RecName: Full=Amino acid transporter {ECO:0000256|RuleBase:RU361216};	pti:PHATRDRAFT_50149	IPR036458;IPR001991	XP_002185065.1			PF00375
	TRINITY_DN36266_c0_g1_i1	tr|B7GD43|B7GD43_PHATC	Phaeodactylum tricornutum (strain CCAP 1055/1)	PHATRDRAFT_50149	ORFNames=PHATRDRAFT_50149 {ECO:0000313|EMBL:EEC43512.1};	B7GD43_PHATC	B7GD43	Amino acid transporter	RecName: Full=Amino acid transporter {ECO:0000256|RuleBase:RU361216};	pti:PHATRDRAFT_50149	IPR036458;IPR001991	XP_002185065.1			PF00375
	TRINITY_DN36266_c0_g1_i7	tr|B7GD43|B7GD43_PHATC	Phaeodactylum tricornutum (strain CCAP 1055/1)	PHATRDRAFT_50149	ORFNames=PHATRDRAFT_50149 {ECO:0000313|EMBL:EEC43512.1};	B7GD43_PHATC	B7GD43	Amino acid transporter	RecName: Full=Amino acid transporter {ECO:0000256|RuleBase:RU361216};	pti:PHATRDRAFT_50149	IPR036458;IPR001991	XP_002185065.1			PF00375
	TRINITY_DN36230_c0_g1_i1	tr|I1HGE1|I1HGE1_BRADI	Brachypodium distachyon (Purple false brome) (Trachynia distachya)	LOC100846914 BRADI_2g16480	Name=LOC100846914 {ECO:0000313|EnsemblPlants:BRADI2G16480.1}; ORFNames=BRADI_2g16480 {ECO:0000313|EMBL:KQK04867.1};	I1HGE1_BRADI	I1HGE1	Uncharacterized protein	SubName: Full=Uncharacterized protein {ECO:0000313|EMBL:KQK04867.1, ECO:0000313|EnsemblPlants:BRADI2G16480.1};	bdi:100846914	IPR027417;IPR005225;IPR001806	XP_003567893.1	KOG0087;COG1100	EOG09360LOE	PF00071			TIGR00231
	TRINITY_DN46267_c0_g1_i1	tr|K3YG79|K3YG79_SETIT	Setaria italica (Foxtail millet) (Panicum italicum)	SETIT_013247mg	ORFNames=SETIT_013247mg {ECO:0000313|EMBL:KQL00755.1};	K3YG79_SETIT	K3YG79	DNA-directed RNA polymerase subunit	RecName: Full=DNA-directed RNA polymerase subunit {ECO:0000256|RuleBase:RU004279}; EC=2.7.7.6 {ECO:0000256|RuleBase:RU004279};	sita:106804399	IPR000722;IPR006592;IPR007080;IPR007066;IPR007083;IPR007081	XP_014660874.1	KOG0260;COG0086		PF04997;PF00623;PF04983;PF05000;PF04998
	TRINITY_DN46215_c0_g1_i1	tr|R1DUA5|R1DUA5_EMIHU	Emiliania huxleyi (Pontosphaera huxleyi)	EMIHUDRAFT_196115	ORFNames=EMIHUDRAFT_196115 {ECO:0000313|EMBL:EOD18070.1};	R1DUA5_EMIHU	R1DUA5	Putative arginine kinase	SubName: Full=Putative arginine kinase {ECO:0000313|EMBL:EOD18070.1};	ehx:EMIHUDRAFT_196115	IPR000749;IPR022415;IPR022414;IPR022413;IPR036802;IPR014746	XP_005770499.1			PF00217;PF02807	PS00112;PS51510;PS51509	PTHR11547
	TRINITY_DN46215_c0_g1_i2	tr|R1DUA5|R1DUA5_EMIHU	Emiliania huxleyi (Pontosphaera huxleyi)	EMIHUDRAFT_196115	ORFNames=EMIHUDRAFT_196115 {ECO:0000313|EMBL:EOD18070.1};	R1DUA5_EMIHU	R1DUA5	Putative arginine kinase	SubName: Full=Putative arginine kinase {ECO:0000313|EMBL:EOD18070.1};	ehx:EMIHUDRAFT_196115	IPR000749;IPR022415;IPR022414;IPR022413;IPR036802;IPR014746	XP_005770499.1			PF00217;PF02807	PS00112;PS51510;PS51509	PTHR11547
	TRINITY_DN46299_c0_g2_i2	tr|I1GUP1|I1GUP1_BRADI	Brachypodium distachyon (Purple false brome) (Trachynia distachya)	LOC100838067 BRADI_1g28430	Name=LOC100838067 {ECO:0000313|EnsemblPlants:BRADI1G28430.1}; ORFNames=BRADI_1g28430 {ECO:0000313|EMBL:KQK16370.1};	I1GUP1_BRADI	I1GUP1	Uncharacterized protein	SubName: Full=Uncharacterized protein {ECO:0000313|EMBL:KQK16370.1, ECO:0000313|EnsemblPlants:BRADI1G28430.1};	bdi:100838067	IPR001841;IPR013083	XP_003563155.1	KOG0800;ENOG41121N2	EOG09360I24	PF13639	PS50089
	TRINITY_DN46299_c0_g2_i4	tr|I1GUP1|I1GUP1_BRADI	Brachypodium distachyon (Purple false brome) (Trachynia distachya)	LOC100838067 BRADI_1g28430	Name=LOC100838067 {ECO:0000313|EnsemblPlants:BRADI1G28430.1}; ORFNames=BRADI_1g28430 {ECO:0000313|EMBL:KQK16370.1};	I1GUP1_BRADI	I1GUP1	Uncharacterized protein	SubName: Full=Uncharacterized protein {ECO:0000313|EMBL:KQK16370.1, ECO:0000313|EnsemblPlants:BRADI1G28430.1};	bdi:100838067	IPR001841;IPR013083	XP_003563155.1	KOG0800;ENOG41121N2	EOG09360I24	PF13639	PS50089
	TRINITY_DN61362_c0_g3_i1	tr|B7FT68|B7FT68_PHATC	Phaeodactylum tricornutum (strain CCAP 1055/1)	PHATRDRAFT_4025	ORFNames=PHATRDRAFT_4025 {ECO:0000313|EMBL:EEC50602.1};	B7FT68_PHATC	B7FT68	Predicted protein	SubName: Full=Predicted protein {ECO:0000313|EMBL:EEC50602.1}; Flags: Fragment;	pti:PHATRDRAFT_4025	IPR022663;IPR000846;IPR023940;IPR011859;IPR036291	XP_002177788.1			PF05173;PF01113		PTHR20836	TIGR02130
	TRINITY_DN10668_c0_g1_i3	tr|K4A5M6|K4A5M6_SETIT	Setaria italica (Foxtail millet) (Panicum italicum)	LOC101764463 SETIT_034180mg	Name=LOC101764463 {ECO:0000313|EnsemblPlants:Si034180m}; ORFNames=SETIT_034180mg {ECO:0000313|EMBL:KQK91014.1};	K4A5M6_SETIT	K4A5M6	Uncharacterized protein	SubName: Full=Uncharacterized protein {ECO:0000313|EMBL:KQK91014.1, ECO:0000313|EnsemblPlants:Si034180m};	sita:101764463	IPR021157;IPR011009;IPR024788;IPR000719;IPR017441;IPR001245;IPR008271	XP_004984479.1	KOG1187;COG0515	EOG093601SG	PF12819;PF07714	PS00107;PS50011;PS00108
	TRINITY_DN10668_c0_g1_i2	tr|K4A5M6|K4A5M6_SETIT	Setaria italica (Foxtail millet) (Panicum italicum)	LOC101764463 SETIT_034180mg	Name=LOC101764463 {ECO:0000313|EnsemblPlants:Si034180m}; ORFNames=SETIT_034180mg {ECO:0000313|EMBL:KQK91014.1};	K4A5M6_SETIT	K4A5M6	Uncharacterized protein	SubName: Full=Uncharacterized protein {ECO:0000313|EMBL:KQK91014.1, ECO:0000313|EnsemblPlants:Si034180m};	sita:101764463	IPR021157;IPR011009;IPR024788;IPR000719;IPR017441;IPR001245;IPR008271	XP_004984479.1	KOG1187;COG0515	EOG093601SG	PF12819;PF07714	PS00107;PS50011;PS00108
	TRINITY_DN10606_c0_g1_i7	tr|A0A0Q3H4D5|A0A0Q3H4D5_BRADI	Brachypodium distachyon (Purple false brome) (Trachynia distachya)	BRADI_1g34180	ORFNames=BRADI_1g34180 {ECO:0000313|EMBL:KQK17397.1};	A0A0Q3H4D5_BRADI	A0A0Q3H4D5	Uncharacterized protein	SubName: Full=Uncharacterized protein {ECO:0000313|EMBL:KQK17397.1};	bdi:100845164	IPR029044;IPR002618	XP_003563510.2			PF01704
	TRINITY_DN63800_c0_g1_i2	tr|B8BZK1|B8BZK1_THAPS	Thalassiosira pseudonana (Marine diatom) (Cyclotella nana)	PMM1 THAPSDRAFT_22301	Name=PMM1 {ECO:0000313|EMBL:EED92893.1}; ORFNames=THAPSDRAFT_22301 {ECO:0000313|EMBL:EED92893.1};	B8BZK1_THAPS	B8BZK1	Phosphomannomutase	RecName: Full=Phosphomannomutase {ECO:0000256|RuleBase:RU361118}; EC=5.4.2.8 {ECO:0000256|RuleBase:RU361118};	tps:THAPSDRAFT_22301	IPR036412;IPR006379;IPR023214;IPR005002	XP_002289356.1	KOG3189;COG0561		PF03332		PTHR10466	TIGR01484
	TRINITY_DN63800_c0_g1_i1	tr|B8BZK1|B8BZK1_THAPS	Thalassiosira pseudonana (Marine diatom) (Cyclotella nana)	PMM1 THAPSDRAFT_22301	Name=PMM1 {ECO:0000313|EMBL:EED92893.1}; ORFNames=THAPSDRAFT_22301 {ECO:0000313|EMBL:EED92893.1};	B8BZK1_THAPS	B8BZK1	Phosphomannomutase	RecName: Full=Phosphomannomutase {ECO:0000256|RuleBase:RU361118}; EC=5.4.2.8 {ECO:0000256|RuleBase:RU361118};	tps:THAPSDRAFT_22301	IPR036412;IPR006379;IPR023214;IPR005002	XP_002289356.1	KOG3189;COG0561		PF03332		PTHR10466	TIGR01484
	TRINITY_DN63838_c0_g1_i2	tr|B7S3N7|B7S3N7_PHATC	Phaeodactylum tricornutum (strain CCAP 1055/1)	PHATRDRAFT_bd1572	ORFNames=PHATRDRAFT_bd1572 {ECO:0000313|EMBL:EEC42834.1};	B7S3N7_PHATC	B7S3N7	Predicted protein	SubName: Full=Predicted protein {ECO:0000313|EMBL:EEC42834.1};	pti:PHATRDRAFT_bd1572	IPR000941;IPR036849;IPR029017;IPR034390;IPR020810;IPR020809;IPR020811	XP_002176181.1			PF00113;PF03952	PS00164	PTHR11902	TIGR01060
	TRINITY_DN63838_c0_g1_i1	tr|B7S3N7|B7S3N7_PHATC	Phaeodactylum tricornutum (strain CCAP 1055/1)	PHATRDRAFT_bd1572	ORFNames=PHATRDRAFT_bd1572 {ECO:0000313|EMBL:EEC42834.1};	B7S3N7_PHATC	B7S3N7	Predicted protein	SubName: Full=Predicted protein {ECO:0000313|EMBL:EEC42834.1};	pti:PHATRDRAFT_bd1572	IPR000941;IPR036849;IPR029017;IPR034390;IPR020810;IPR020809;IPR020811	XP_002176181.1			PF00113;PF03952	PS00164	PTHR11902	TIGR01060
	TRINITY_DN63838_c0_g1_i4	tr|B7S3N7|B7S3N7_PHATC	Phaeodactylum tricornutum (strain CCAP 1055/1)	PHATRDRAFT_bd1572	ORFNames=PHATRDRAFT_bd1572 {ECO:0000313|EMBL:EEC42834.1};	B7S3N7_PHATC	B7S3N7	Predicted protein	SubName: Full=Predicted protein {ECO:0000313|EMBL:EEC42834.1};	pti:PHATRDRAFT_bd1572	IPR000941;IPR036849;IPR029017;IPR034390;IPR020810;IPR020809;IPR020811	XP_002176181.1			PF00113;PF03952	PS00164	PTHR11902	TIGR01060
	TRINITY_DN63894_c0_g1_i1	sp|Q5VNM3|IF43A_ORYSJ	Oryza sativa subsp. japonica (Rice)	EIF4A3A EIF4A3, RH2 Os01g0639100, LOC_Os01g45190 OsJ_02769, P0004A09.21, P0696E01.42	Name=EIF4A3A {ECO:0000303|PubMed:27071313}; Synonyms=EIF4A3 {ECO:0000305}, RH2 {ECO:0000303|PubMed:27071313}; OrderedLocusNames=Os01g0639100 {ECO:0000312|EMBL:BAS73356.1}, LOC_Os01g45190 {ECO:0000305}; ORFNames=OsJ_02769 {ECO:0000312|EMBL:EEE55061.1}, P0004A09.21 {ECO:0000312|EMBL:BAD68586.1}, P0696E01.42 {ECO:0000312|EMBL:BAD68952.1};	IF43A_ORYSJ	Q5VNM3	Eukaryotic initiation factor 4A-III homolog A; OseIF4AIIIa; eIF-4A-III; eIF4A-III; DEAD-box ATP-dependent RNA helicase 2; OsRH2	RecName: Full=Eukaryotic initiation factor 4A-III homolog A {ECO:0000305}; Short=OseIF4AIIIa {ECO:0000303|PubMed:27071313}; Short=eIF-4A-III {ECO:0000305}; Short=eIF4A-III {ECO:0000305}; EC=3.6.4.13 {ECO:0000305}; AltName: Full=DEAD-box ATP-dependent RNA helicase 2 {ECO:0000303|PubMed:27071313}; Short=OsRH2 {ECO:0000303|PubMed:27071313};	osa:4326580	IPR011545;IPR014001;IPR001650;IPR027417;IPR000629;IPR014014	XP_015621327.1	KOG0328;COG0513	EOG09360AWV	PF00270;PF00271	PS00039;PS51192;PS51194;PS51195
	TRINITY_DN63863_c0_g1_i1	tr|G9HNS3|G9HNS3_PHODC	Phoenix dactylifera (Date palm)	RNA_pol DP_006	Name=RNA_pol {ECO:0000313|EMBL:AEM43903.1, ECO:0000313|RefSeq:YP_005090363.1}; ORFNames=DP_006 {ECO:0000313|EMBL:AEM43903.1, ECO:0000313|RefSeq:YP_005090363.1};	G9HNS3_PHODC	G9HNS3	DNA-directed RNA polymerase	RecName: Full=DNA-directed RNA polymerase {ECO:0000256|RuleBase:RU003805}; EC=2.7.7.6 {ECO:0000256|RuleBase:RU003805};	pda:11542588	IPR002092;IPR037159	YP_005090363.1			PF00940	PS00900;PS00489	PTHR10102
	TRINITY_DN63863_c0_g1_i2	tr|G9HNS3|G9HNS3_PHODC	Phoenix dactylifera (Date palm)	RNA_pol DP_006	Name=RNA_pol {ECO:0000313|EMBL:AEM43903.1, ECO:0000313|RefSeq:YP_005090363.1}; ORFNames=DP_006 {ECO:0000313|EMBL:AEM43903.1, ECO:0000313|RefSeq:YP_005090363.1};	G9HNS3_PHODC	G9HNS3	DNA-directed RNA polymerase	RecName: Full=DNA-directed RNA polymerase {ECO:0000256|RuleBase:RU003805}; EC=2.7.7.6 {ECO:0000256|RuleBase:RU003805};	pda:11542588	IPR002092;IPR037159	YP_005090363.1			PF00940	PS00900;PS00489	PTHR10102
	TRINITY_DN63823_c0_g1_i3	tr|I1H036|I1H036_BRADI	Brachypodium distachyon (Purple false brome) (Trachynia distachya)	LOC100838652 BRADI_1g46660	Name=LOC100838652 {ECO:0000313|EnsemblPlants:BRADI1G46660.1}; ORFNames=BRADI_1g46660 {ECO:0000313|EMBL:KQK19159.1};	I1H036_BRADI	I1H036	Uncharacterized protein	SubName: Full=Uncharacterized protein {ECO:0000313|EMBL:KQK19159.1, ECO:0000313|EnsemblPlants:BRADI1G46660.1};	bdi:100838652	IPR002013	XP_003560966.1	KOG1888;COG5329	EOG093602KL	PF02383	PS50275
	TRINITY_DN63823_c0_g1_i7	tr|I1H036|I1H036_BRADI	Brachypodium distachyon (Purple false brome) (Trachynia distachya)	LOC100838652 BRADI_1g46660	Name=LOC100838652 {ECO:0000313|EnsemblPlants:BRADI1G46660.1}; ORFNames=BRADI_1g46660 {ECO:0000313|EMBL:KQK19159.1};	I1H036_BRADI	I1H036	Uncharacterized protein	SubName: Full=Uncharacterized protein {ECO:0000313|EMBL:KQK19159.1, ECO:0000313|EnsemblPlants:BRADI1G46660.1};	bdi:100838652	IPR002013	XP_003560966.1	KOG1888;COG5329	EOG093602KL	PF02383	PS50275
	TRINITY_DN63823_c0_g1_i4	tr|I1H036|I1H036_BRADI	Brachypodium distachyon (Purple false brome) (Trachynia distachya)	LOC100838652 BRADI_1g46660	Name=LOC100838652 {ECO:0000313|EnsemblPlants:BRADI1G46660.1}; ORFNames=BRADI_1g46660 {ECO:0000313|EMBL:KQK19159.1};	I1H036_BRADI	I1H036	Uncharacterized protein	SubName: Full=Uncharacterized protein {ECO:0000313|EMBL:KQK19159.1, ECO:0000313|EnsemblPlants:BRADI1G46660.1};	bdi:100838652	IPR002013	XP_003560966.1	KOG1888;COG5329	EOG093602KL	PF02383	PS50275
	TRINITY_DN63814_c1_g1_i1	sp|G0SGK0|CBF5_CHATD	Chaetomium thermophilum (strain DSM 1495 / CBS 144.50 / IMI 039719)	CBF5 CTHT_0066610	Name=CBF5; ORFNames=CTHT_0066610;	CBF5_CHATD	G0SGK0	H/ACA ribonucleoprotein complex subunit 4; Centromere-binding factor 5; Centromere/microtubule-binding protein CBF5; H/ACA snoRNP protein CBF5; Small nucleolar RNP protein CBF5	RecName: Full=H/ACA ribonucleoprotein complex subunit 4; EC=5.4.99.-; AltName: Full=Centromere-binding factor 5; AltName: Full=Centromere/microtubule-binding protein CBF5; AltName: Full=H/ACA snoRNP protein CBF5; AltName: Full=Small nucleolar RNP protein CBF5;	cthr:CTHT_0066610	IPR012960;IPR020103;IPR002501;IPR002478;IPR015947;IPR036974;IPR004802;IPR032819;IPR004521	XP_006696957.1		EOG092C28F5	PF08068;PF01472;PF16198;PF01509	PS50890	PTHR23127	TIGR00425;TIGR00451
	TRINITY_DN91358_c0_g1_i1	tr|M2WZ21|M2WZ21_GALSU	Galdieria sulphuraria (Red alga)	Gasu_33260	ORFNames=Gasu_33260 {ECO:0000313|EMBL:EME29320.1};	M2WZ21_GALSU	M2WZ21	Uncharacterized protein	SubName: Full=Uncharacterized protein {ECO:0000313|EMBL:EME29320.1};	gsl:Gasu_33260	IPR020472;IPR011048;IPR002674;IPR011331;IPR011332;IPR015943;IPR001680;IPR017986;IPR036322	XP_005705840.1			PF01780;PF00400	PS50082;PS50294		TIGR00280
	TRINITY_DN91358_c0_g1_i2	tr|M2WZ21|M2WZ21_GALSU	Galdieria sulphuraria (Red alga)	Gasu_33260	ORFNames=Gasu_33260 {ECO:0000313|EMBL:EME29320.1};	M2WZ21_GALSU	M2WZ21	Uncharacterized protein	SubName: Full=Uncharacterized protein {ECO:0000313|EMBL:EME29320.1};	gsl:Gasu_33260	IPR020472;IPR011048;IPR002674;IPR011331;IPR011332;IPR015943;IPR001680;IPR017986;IPR036322	XP_005705840.1			PF01780;PF00400	PS50082;PS50294		TIGR00280
	TRINITY_DN91356_c0_g1_i1	tr|Q54M41|Q54M41_DICDI	Dictyostelium discoideum (Slime mold)	DDB0218799	ORFNames=DDB0218799 {ECO:0000313|EMBL:EAL64341.1};	Q54M41_DICDI	Q54M41	Uncharacterized protein	SubName: Full=Uncharacterized protein {ECO:0000313|EMBL:EAL64341.1};	ddi:DDB_G0286331	IPR001374;IPR036867;IPR035979;IPR000504	XP_637790.1	KOG0108;ENOG410XQBV		PF01424;PF00076	PS51061;PS50102
	TRINITY_DN91328_c0_g1_i1	tr|G4ZGH2|G4ZGH2_PHYSP	Phytophthora sojae (strain P6497) (Soybean stem and root rot agent) (Phytophthora megasperma f. sp. glycines)	PHYSODRAFT_499593	ORFNames=PHYSODRAFT_499593 {ECO:0000313|EMBL:EGZ16674.1};	G4ZGH2_PHYSP	G4ZGH2	Glutathione synthetase; GSH-S	RecName: Full=Glutathione synthetase {ECO:0000256|PIRNR:PIRNR001558}; Short=GSH-S {ECO:0000256|PIRNR:PIRNR001558}; EC=6.3.2.3 {ECO:0000256|PIRNR:PIRNR001558};	psoj:PHYSODRAFT_499593	IPR005615;IPR014042;IPR014709;IPR014049;IPR037013;IPR004887;IPR016185	XP_009525732.1			PF03917;PF03199		PTHR11130	TIGR01986
	TRINITY_DN1583_c0_g4_i1	sp|Q5ZCI1|MPK10_ORYSJ	Oryza sativa subsp. japonica (Rice)	MPK10 Os01g0629900, LOC_Os01g43910 OsJ_02699, OSJNBb0035I14.5-1, OSJNBb0035I14.5-2, OSJNBb0035I14.5-3	Name=MPK10; OrderedLocusNames=Os01g0629900 {ECO:0000312|EMBL:BAF05556.1}, LOC_Os01g43910 {ECO:0000305}; ORFNames=OsJ_02699 {ECO:0000312|EMBL:EEE55030.1}, OSJNBb0035I14.5-1, OSJNBb0035I14.5-2, OSJNBb0035I14.5-3;	MPK10_ORYSJ	Q5ZCI1	Mitogen-activated protein kinase 10; MAP kinase 10	RecName: Full=Mitogen-activated protein kinase 10; Short=MAP kinase 10; EC=2.7.11.24;	osa:4326668	IPR011009;IPR003527;IPR000719;IPR017441	XP_015621247.1	KOG0660;ENOG410XNY0	EOG093605CF	PF00069	PS01351;PS00107;PS50011
	TRINITY_DN1558_c1_g1_i3	sp|Q75IZ7|NFYB8_ORYSJ	Oryza sativa subsp. japonica (Rice)	NFYB8 HAP3I Os03g0413000, LOC_Os03g29970	Name=NFYB8 {ECO:0000305}; Synonyms=HAP3I {ECO:0000303|PubMed:18193457}; OrderedLocusNames=Os03g0413000 {ECO:0000312|EMBL:BAF12272.1}, LOC_Os03g29970 {ECO:0000312|EMBL:ABF96585.1};	NFYB8_ORYSJ	Q75IZ7	Nuclear transcription factor Y subunit B-8; OsNF-YB8; Transcriptional activator HAP3I; OsHAP3I	RecName: Full=Nuclear transcription factor Y subunit B-8 {ECO:0000305}; Short=OsNF-YB8 {ECO:0000303|PubMed:26542958}; AltName: Full=Transcriptional activator HAP3I {ECO:0000305}; Short=OsHAP3I {ECO:0000303|PubMed:18193457};	osa:4333105	IPR003958;IPR009072;IPR003956	XP_015631006.1	KOG0869;COG2036	EOG09360PJ1	PF00808	PS00685
	TRINITY_DN43285_c0_g2_i1	tr|K4ACV2|K4ACV2_SETIT	Setaria italica (Foxtail millet) (Panicum italicum)	LOC101775645 SETIT_036709mg	Name=LOC101775645 {ECO:0000313|EnsemblPlants:Si036709m}; ORFNames=SETIT_036709mg {ECO:0000313|EMBL:KQK86139.1};	K4ACV2_SETIT	K4ACV2	Uncharacterized protein	SubName: Full=Uncharacterized protein {ECO:0000313|EMBL:KQK86139.1, ECO:0000313|EnsemblPlants:Si036709m};	sita:101775645	IPR013989	XP_004981020.1	ENOG410IDX4;ENOG410XSSR	EOG09360GN1	PF10539	PS51222
	TRINITY_DN43263_c0_g2_i1	tr|A0A0L8FIV1|A0A0L8FIV1_OCTBM	Octopus bimaculoides (California two-spotted octopus)	OCBIM_22018401mg	ORFNames=OCBIM_22018401mg {ECO:0000313|EMBL:KOF63781.1};	A0A0L8FIV1_OCTBM	A0A0L8FIV1	Uncharacterized protein	SubName: Full=Uncharacterized protein {ECO:0000313|EMBL:KOF63781.1};	obi:106883088	IPR000851;IPR005324;IPR020568;IPR014721;IPR005711;IPR013810;IPR018192	XP_014789467.1			PF00333;PF03719	PS00585;PS50881	PTHR13718	TIGR01020
	TRINITY_DN43295_c1_g1_i3	tr|B2MUU4|B2MUU4_MAIZE	Zea mays (Maize)			B2MUU4_MAIZE	B2MUU4	Starch synthase V	SubName: Full=Starch synthase V {ECO:0000313|EMBL:ACC78132.1};	zma:100170250	IPR013534	NP_001123603.1	ENOG410IGEP;COG0297	EOG0936096D	PF08323
	TRINITY_DN43295_c1_g1_i1	tr|B2MUU4|B2MUU4_MAIZE	Zea mays (Maize)			B2MUU4_MAIZE	B2MUU4	Starch synthase V	SubName: Full=Starch synthase V {ECO:0000313|EMBL:ACC78132.1};	zma:100170250	IPR013534	NP_001123603.1	ENOG410IGEP;COG0297	EOG0936096D	PF08323
	TRINITY_DN36449_c0_g1_i11	tr|A0A0Q3HHW5|A0A0Q3HHW5_BRADI	Brachypodium distachyon (Purple false brome) (Trachynia distachya)	BRADI_1g65610	ORFNames=BRADI_1g65610 {ECO:0000313|EMBL:KQK22173.1};	A0A0Q3HHW5_BRADI	A0A0Q3HHW5	Phosphoinositide phospholipase C	RecName: Full=Phosphoinositide phospholipase C {ECO:0000256|RuleBase:RU361133}; EC=3.1.4.11 {ECO:0000256|RuleBase:RU361133};	bdi:100831986	IPR000008;IPR035892;IPR011992;IPR001192;IPR028407;IPR017946;IPR000909;IPR001711	XP_014753355.1			PF00168;PF00388;PF00387	PS50004;PS50007;PS50008	PTHR10336;PTHR10336:SF109
	TRINITY_DN36449_c0_g1_i3	tr|A0A0Q3HHW5|A0A0Q3HHW5_BRADI	Brachypodium distachyon (Purple false brome) (Trachynia distachya)	BRADI_1g65610	ORFNames=BRADI_1g65610 {ECO:0000313|EMBL:KQK22173.1};	A0A0Q3HHW5_BRADI	A0A0Q3HHW5	Phosphoinositide phospholipase C	RecName: Full=Phosphoinositide phospholipase C {ECO:0000256|RuleBase:RU361133}; EC=3.1.4.11 {ECO:0000256|RuleBase:RU361133};	bdi:100831986	IPR000008;IPR035892;IPR011992;IPR001192;IPR028407;IPR017946;IPR000909;IPR001711	XP_014753355.1			PF00168;PF00388;PF00387	PS50004;PS50007;PS50008	PTHR10336;PTHR10336:SF109
	TRINITY_DN36449_c0_g1_i8	tr|A0A0Q3HHW5|A0A0Q3HHW5_BRADI	Brachypodium distachyon (Purple false brome) (Trachynia distachya)	BRADI_1g65610	ORFNames=BRADI_1g65610 {ECO:0000313|EMBL:KQK22173.1};	A0A0Q3HHW5_BRADI	A0A0Q3HHW5	Phosphoinositide phospholipase C	RecName: Full=Phosphoinositide phospholipase C {ECO:0000256|RuleBase:RU361133}; EC=3.1.4.11 {ECO:0000256|RuleBase:RU361133};	bdi:100831986	IPR000008;IPR035892;IPR011992;IPR001192;IPR028407;IPR017946;IPR000909;IPR001711	XP_014753355.1			PF00168;PF00388;PF00387	PS50004;PS50007;PS50008	PTHR10336;PTHR10336:SF109
	TRINITY_DN73581_c0_g1_i1	tr|B6SQ05|B6SQ05_MAIZE	Zea mays (Maize)			B6SQ05_MAIZE	B6SQ05	Uncharacterized protein	SubName: Full=Uncharacterized protein {ECO:0000313|EMBL:ACG26938.1};	zma:100275203	IPR028144	NP_001315041.1			PF12734
	TRINITY_DN73519_c0_g1_i1	sp|Q5JK20|ARFD_ORYSJ	Oryza sativa subsp. japonica (Rice)	ARF4 ARF2 Os01g0927600, LOC_Os01g70270 OSJNBa0093F16.35	Name=ARF4; Synonyms=ARF2; OrderedLocusNames=Os01g0927600, LOC_Os01g70270; ORFNames=OSJNBa0093F16.35;	ARFD_ORYSJ	Q5JK20	Auxin response factor 4; OsARF2	RecName: Full=Auxin response factor 4; AltName: Full=OsARF2;	osa:4326957	IPR033389;IPR010525;IPR003340;IPR015300;IPR000270	XP_015650953.1	ENOG410IE1Z;ENOG4110RNJ	EOG09360207	PF02309;PF06507;PF02362	PS50863;PS51745
	TRINITY_DN73571_c0_g1_i2	tr|D7MMF0|D7MMF0_ARALL	Arabidopsis lyrata subsp. lyrata (Lyre-leaved rock-cress)	ARALYDRAFT_686444	ORFNames=ARALYDRAFT_686444 {ECO:0000313|EMBL:EFH43009.1};	D7MMF0_ARALL	D7MMF0	Predicted protein	SubName: Full=Predicted protein {ECO:0000313|EMBL:EFH43009.1};	aly:ARALYDRAFT_686444	IPR022087;IPR003903	XP_002866750.1		EOG093607RD	PF12315	PS50330
	TRINITY_DN3334_c1_g1_i2	tr|I1IQK3|I1IQK3_BRADI	Brachypodium distachyon (Purple false brome) (Trachynia distachya)	LOC100836813 BRADI_4g31640	Name=LOC100836813 {ECO:0000313|EnsemblPlants:BRADI4G31640.1}; ORFNames=BRADI_4g31640 {ECO:0000313|EMBL:KQJ90451.1};	I1IQK3_BRADI	I1IQK3	Gamma-tubulin complex component	RecName: Full=Gamma-tubulin complex component {ECO:0000256|RuleBase:RU363050};	bdi:100836813	IPR007259	XP_003578199.1;XP_010238223.1	KOG2000;ENOG410XQ5B	EOG093601JG	PF04130		PTHR19302
	TRINITY_DN3397_c0_g1_i5	tr|K3YAJ1|K3YAJ1_SETIT	Setaria italica (Foxtail millet) (Panicum italicum)	LOC101773175 SETIT_011233mg	Name=LOC101773175 {ECO:0000313|EnsemblPlants:Si011233m}; ORFNames=SETIT_011233mg {ECO:0000313|EMBL:KQK97323.1};	K3YAJ1_SETIT	K3YAJ1	Uncharacterized protein	SubName: Full=Uncharacterized protein {ECO:0000313|EMBL:KQK97323.1, ECO:0000313|EnsemblPlants:Si011233m};	sita:101773175	IPR029069;IPR003736;IPR006683	XP_004975665.1	KOG3328;COG2050	EOG09360VP7	PF03061			TIGR00369
	TRINITY_DN3397_c0_g1_i7	tr|K3YAJ1|K3YAJ1_SETIT	Setaria italica (Foxtail millet) (Panicum italicum)	LOC101773175 SETIT_011233mg	Name=LOC101773175 {ECO:0000313|EnsemblPlants:Si011233m}; ORFNames=SETIT_011233mg {ECO:0000313|EMBL:KQK97323.1};	K3YAJ1_SETIT	K3YAJ1	Uncharacterized protein	SubName: Full=Uncharacterized protein {ECO:0000313|EMBL:KQK97323.1, ECO:0000313|EnsemblPlants:Si011233m};	sita:101773175	IPR029069;IPR003736;IPR006683	XP_004975665.1	KOG3328;COG2050	EOG09360VP7	PF03061			TIGR00369
	TRINITY_DN3397_c0_g1_i4	tr|K3YAJ1|K3YAJ1_SETIT	Setaria italica (Foxtail millet) (Panicum italicum)	LOC101773175 SETIT_011233mg	Name=LOC101773175 {ECO:0000313|EnsemblPlants:Si011233m}; ORFNames=SETIT_011233mg {ECO:0000313|EMBL:KQK97323.1};	K3YAJ1_SETIT	K3YAJ1	Uncharacterized protein	SubName: Full=Uncharacterized protein {ECO:0000313|EMBL:KQK97323.1, ECO:0000313|EnsemblPlants:Si011233m};	sita:101773175	IPR029069;IPR003736;IPR006683	XP_004975665.1	KOG3328;COG2050	EOG09360VP7	PF03061			TIGR00369
	TRINITY_DN3397_c0_g1_i13	tr|K3YAJ1|K3YAJ1_SETIT	Setaria italica (Foxtail millet) (Panicum italicum)	LOC101773175 SETIT_011233mg	Name=LOC101773175 {ECO:0000313|EnsemblPlants:Si011233m}; ORFNames=SETIT_011233mg {ECO:0000313|EMBL:KQK97323.1};	K3YAJ1_SETIT	K3YAJ1	Uncharacterized protein	SubName: Full=Uncharacterized protein {ECO:0000313|EMBL:KQK97323.1, ECO:0000313|EnsemblPlants:Si011233m};	sita:101773175	IPR029069;IPR003736;IPR006683	XP_004975665.1	KOG3328;COG2050	EOG09360VP7	PF03061			TIGR00369
	TRINITY_DN3397_c0_g1_i6	tr|K3YAJ1|K3YAJ1_SETIT	Setaria italica (Foxtail millet) (Panicum italicum)	LOC101773175 SETIT_011233mg	Name=LOC101773175 {ECO:0000313|EnsemblPlants:Si011233m}; ORFNames=SETIT_011233mg {ECO:0000313|EMBL:KQK97323.1};	K3YAJ1_SETIT	K3YAJ1	Uncharacterized protein	SubName: Full=Uncharacterized protein {ECO:0000313|EMBL:KQK97323.1, ECO:0000313|EnsemblPlants:Si011233m};	sita:101773175	IPR029069;IPR003736;IPR006683	XP_004975665.1	KOG3328;COG2050	EOG09360VP7	PF03061			TIGR00369
	TRINITY_DN3307_c1_g2_i4	tr|B9HKM1|B9HKM1_POPTR	Populus trichocarpa (Western balsam poplar) (Populus balsamifera subsp. trichocarpa)	POPTR_0008s01830g	ORFNames=POPTR_0008s01830g {ECO:0000313|EMBL:EEE88360.2};	B9HKM1_POPTR	B9HKM1	Uncharacterized protein	SubName: Full=Uncharacterized protein {ECO:0000313|EMBL:EEE88360.2};	pop:POPTR_0008s01830g	IPR002885;IPR035979;IPR000504	XP_002310993.2	KOG4197;ENOG410Z7Z7	EOG093603X7	PF01535;PF12854;PF13041;PF13812;PF00076	PS51375;PS50102		TIGR00756
	TRINITY_DN3310_c0_g4_i1	tr|I1I6Z1|I1I6Z1_BRADI	Brachypodium distachyon (Purple false brome) (Trachynia distachya)	LOC100846008 BRADI_3g35660	Name=LOC100846008 {ECO:0000313|EnsemblPlants:BRADI3G35660.1}; ORFNames=BRADI_3g35660 {ECO:0000313|EMBL:KQJ98240.1};	I1I6Z1_BRADI	I1I6Z1	Uncharacterized protein	SubName: Full=Uncharacterized protein {ECO:0000313|EMBL:KQJ98240.1, ECO:0000313|EnsemblPlants:BRADI3G35660.1};	bdi:100846008	IPR032838;IPR002035;IPR036465	XP_010235116.1	ENOG410IGY0;COG2304	EOG093607C2	PF00092;PF14624	PS50234
	TRINITY_DN3310_c0_g4_i2	tr|I1I6Z1|I1I6Z1_BRADI	Brachypodium distachyon (Purple false brome) (Trachynia distachya)	LOC100846008 BRADI_3g35660	Name=LOC100846008 {ECO:0000313|EnsemblPlants:BRADI3G35660.1}; ORFNames=BRADI_3g35660 {ECO:0000313|EMBL:KQJ98240.1};	I1I6Z1_BRADI	I1I6Z1	Uncharacterized protein	SubName: Full=Uncharacterized protein {ECO:0000313|EMBL:KQJ98240.1, ECO:0000313|EnsemblPlants:BRADI3G35660.1};	bdi:100846008	IPR032838;IPR002035;IPR036465	XP_010235116.1	ENOG410IGY0;COG2304	EOG093607C2	PF00092;PF14624	PS50234
	TRINITY_DN3310_c0_g4_i3	tr|I1I6Z1|I1I6Z1_BRADI	Brachypodium distachyon (Purple false brome) (Trachynia distachya)	LOC100846008 BRADI_3g35660	Name=LOC100846008 {ECO:0000313|EnsemblPlants:BRADI3G35660.1}; ORFNames=BRADI_3g35660 {ECO:0000313|EMBL:KQJ98240.1};	I1I6Z1_BRADI	I1I6Z1	Uncharacterized protein	SubName: Full=Uncharacterized protein {ECO:0000313|EMBL:KQJ98240.1, ECO:0000313|EnsemblPlants:BRADI3G35660.1};	bdi:100846008	IPR032838;IPR002035;IPR036465	XP_010235116.1	ENOG410IGY0;COG2304	EOG093607C2	PF00092;PF14624	PS50234
	TRINITY_DN97467_c0_g1_i1	tr|A0A1U8L6Z5|A0A1U8L6Z5_GOSHI	Gossypium hirsutum (Upland cotton) (Gossypium mexicanum)	LOC107923479	Name=LOC107923479 {ECO:0000313|RefSeq:XP_016709168.1};	A0A1U8L6Z5_GOSHI	A0A1U8L6Z5	heat shock cognate 70 kDa protein-like	SubName: Full=heat shock cognate 70 kDa protein-like {ECO:0000313|RefSeq:XP_016709168.1};	ghi:107923479	IPR018181;IPR029048;IPR029047;IPR013126	XP_016709168.1			PF00012	PS00297;PS00329;PS01036
	TRINITY_DN97434_c0_g1_i2	tr|A0A067CRV6|A0A067CRV6_SAPPC	Saprolegnia parasitica (strain CBS 223.65)	SPRG_02256	ORFNames=SPRG_02256 {ECO:0000313|EMBL:KDO33449.1};	A0A067CRV6_SAPPC	A0A067CRV6	Presenilin	RecName: Full=Presenilin {ECO:0000256|RuleBase:RU361148}; EC=3.4.23.- {ECO:0000256|RuleBase:RU361148};	spar:SPRG_02256	IPR001108;IPR006639	XP_012196195.1			PF01080		PTHR10202
	TRINITY_DN97434_c0_g1_i1	tr|A0A067CRV6|A0A067CRV6_SAPPC	Saprolegnia parasitica (strain CBS 223.65)	SPRG_02256	ORFNames=SPRG_02256 {ECO:0000313|EMBL:KDO33449.1};	A0A067CRV6_SAPPC	A0A067CRV6	Presenilin	RecName: Full=Presenilin {ECO:0000256|RuleBase:RU361148}; EC=3.4.23.- {ECO:0000256|RuleBase:RU361148};	spar:SPRG_02256	IPR001108;IPR006639	XP_012196195.1			PF01080		PTHR10202
	TRINITY_DN23953_c0_g1_i2	tr|Q67WD3|Q67WD3_ORYSJ	Oryza sativa subsp. japonica (Rice)	Os06g0639500 Os06g0639500 OsJ_22106, OSNPB_060639500, P0458E02.13, P0523F01.42	Name=Os06g0639500 {ECO:0000313|EMBL:BAS98796.1}; OrderedLocusNames=Os06g0639500 {ECO:0000313|EMBL:BAF20074.1}; ORFNames=OsJ_22106 {ECO:0000313|EMBL:EAZ37768.1}, OSNPB_060639500 {ECO:0000313|EMBL:BAS98796.1}, P0458E02.13 {ECO:0000313|EMBL:BAD37488.1}, P0523F01.42 {ECO:0000313|EMBL:BAD37536.1};	Q67WD3_ORYSJ	Q67WD3	Os06g0639500 protein; Protein kinase-like	SubName: Full=Os06g0639500 protein {ECO:0000313|EMBL:BAF20074.1}; SubName: Full=Protein kinase-like {ECO:0000313|EMBL:BAD37536.1};	osa:4341621	IPR011009;IPR000719;IPR001245	XP_015643896.1	KOG0198;ENOG410XQGS	EOG093607HA	PF07714	PS50011
	TRINITY_DN23924_c0_g1_i1	tr|Q6H703|Q6H703_ORYSJ	Oryza sativa subsp. japonica (Rice)	Os02g0171100 Os02g0171100 OJ1116_A06.36, OsJ_05558, OSNPB_020171100, P0030G02.26	Name=Os02g0171100 {ECO:0000313|EMBL:BAS77202.1}; OrderedLocusNames=Os02g0171100 {ECO:0000313|EMBL:BAF07945.1}; ORFNames=OJ1116_A06.36 {ECO:0000313|EMBL:BAD25194.1}, OsJ_05558 {ECO:0000313|EMBL:EEE56402.1}, OSNPB_020171100 {ECO:0000313|EMBL:BAS77202.1}, P0030G02.26 {ECO:0000313|EMBL:BAD25496.1};	Q6H703_ORYSJ	Q6H703	Glyceraldehyde-3-phosphate dehydrogenase	RecName: Full=Glyceraldehyde-3-phosphate dehydrogenase {ECO:0000256|RuleBase:RU361160}; EC=1.2.1.- {ECO:0000256|RuleBase:RU361160};	osa:4328446	IPR020831;IPR020830;IPR020829;IPR020828;IPR006424;IPR036291	XP_015627707.1	KOG0657;COG0057	EOG09360F5Y	PF02800;PF00044	PS00071	PTHR10836	TIGR01534
	TRINITY_DN23971_c0_g1_i4	tr|I1H1N2|I1H1N2_BRADI	Brachypodium distachyon (Purple false brome) (Trachynia distachya)	LOC100825538 BRADI_1g51090	Name=LOC100825538 {ECO:0000313|EnsemblPlants:BRADI1G51090.1}; ORFNames=BRADI_1g51090 {ECO:0000313|EMBL:KQK19894.1};	I1H1N2_BRADI	I1H1N2	Uncharacterized protein	SubName: Full=Uncharacterized protein {ECO:0000313|EMBL:KQK19894.1, ECO:0000313|EnsemblPlants:BRADI1G51090.1};	bdi:100825538	IPR005050	XP_003557202.1	ENOG410J1P0;ENOG410YVQQ	EOG09360Z6B	PF03386		PTHR33605
	TRINITY_DN76721_c0_g1_i1	tr|D0N7W0|D0N7W0_PHYIT	Phytophthora infestans (strain T30-4) (Potato late blight fungus)	PITG_07349	ORFNames=PITG_07349 {ECO:0000313|EMBL:EEY53659.1};	D0N7W0_PHYIT	D0N7W0	Gamma-glutamyl hydrolase, putative	SubName: Full=Gamma-glutamyl hydrolase, putative {ECO:0000313|EMBL:EEY53659.1};	pif:PITG_07349	IPR029062;IPR015527;IPR011697	XP_002905277.1			PF07722	PS51275	PTHR11315
	TRINITY_DN76721_c0_g1_i2	tr|D0N7W0|D0N7W0_PHYIT	Phytophthora infestans (strain T30-4) (Potato late blight fungus)	PITG_07349	ORFNames=PITG_07349 {ECO:0000313|EMBL:EEY53659.1};	D0N7W0_PHYIT	D0N7W0	Gamma-glutamyl hydrolase, putative	SubName: Full=Gamma-glutamyl hydrolase, putative {ECO:0000313|EMBL:EEY53659.1};	pif:PITG_07349	IPR029062;IPR015527;IPR011697	XP_002905277.1			PF07722	PS51275	PTHR11315
	TRINITY_DN76755_c0_g1_i1	tr|N1Q9Y1|N1Q9Y1_PSEFD	Pseudocercospora fijiensis (strain CIRAD86) (Black leaf streak disease fungus) (Mycosphaerella fijiensis)	MYCFIDRAFT_209593	ORFNames=MYCFIDRAFT_209593 {ECO:0000313|EMBL:EME87707.1};	N1Q9Y1_PSEFD	N1Q9Y1	Elongation factor 1-alpha	RecName: Full=Elongation factor 1-alpha {ECO:0000256|RuleBase:RU000325};	pfj:MYCFIDRAFT_209593	IPR004161;IPR031157;IPR027417;IPR000795;IPR009000;IPR009001;IPR004539;IPR004160	XP_007921049.1		EOG092C2HV8	PF00009;PF03144;PF03143	PS00301;PS51722		TIGR00483
	TRINITY_DN34201_c0_g1_i1	tr|A0A0Q3FAS2|A0A0Q3FAS2_BRADI	Brachypodium distachyon (Purple false brome) (Trachynia distachya)	BRADI_3g22960	ORFNames=BRADI_3g22960 {ECO:0000313|EMBL:KQJ96414.1};	A0A0Q3FAS2_BRADI	A0A0Q3FAS2	Uncharacterized protein	SubName: Full=Uncharacterized protein {ECO:0000313|EMBL:KQJ96414.1};	bdi:100839410	IPR000415	XP_010234663.2
	TRINITY_DN34214_c0_g1_i1	tr|A0A0Q3GPZ5|A0A0Q3GPZ5_BRADI	Brachypodium distachyon (Purple false brome) (Trachynia distachya)	BRADI_1g04000	ORFNames=BRADI_1g04000 {ECO:0000313|EMBL:KQK12485.1};	A0A0Q3GPZ5_BRADI	A0A0Q3GPZ5	Uncharacterized protein	SubName: Full=Uncharacterized protein {ECO:0000313|EMBL:KQK12485.1};	bdi:100841680	IPR028288;IPR003124	XP_010227781.1				PS51082	PTHR12902
	TRINITY_DN34299_c0_g2_i1	tr|Q7XU26|Q7XU26_ORYSJ	Oryza sativa subsp. japonica (Rice)	Os04g0550200 Os04g0550200 OSJNBb0034G17.6, OSNPB_040550200	Name=Os04g0550200 {ECO:0000313|EMBL:BAS90370.1}; OrderedLocusNames=Os04g0550200 {ECO:0000313|EMBL:BAF15401.1}; ORFNames=OSJNBb0034G17.6 {ECO:0000313|EMBL:CAD41604.3}, OSNPB_040550200 {ECO:0000313|EMBL:BAS90370.1};	Q7XU26_ORYSJ	Q7XU26	OSJNBb0034G17.6 protein; Os04g0550200 protein; Transcription factor; cDNA clone:002-143-E08, full insert sequence	SubName: Full=OSJNBb0034G17.6 protein {ECO:0000313|EMBL:CAD41604.3}; SubName: Full=Os04g0550200 protein {ECO:0000313|EMBL:BAF15401.1}; SubName: Full=Transcription factor {ECO:0000313|EMBL:AAP83324.1}; SubName: Full=cDNA clone:002-143-E08, full insert sequence {ECO:0000313|EMBL:BAG98412.1};	osa:4336587	IPR001471;IPR036955;IPR016177	XP_015634439.1	ENOG410IY7W;ENOG410YIZG	EOG09360N5C	PF00847	PS51032
	TRINITY_DN34299_c0_g2_i2	tr|Q7XU26|Q7XU26_ORYSJ	Oryza sativa subsp. japonica (Rice)	Os04g0550200 Os04g0550200 OSJNBb0034G17.6, OSNPB_040550200	Name=Os04g0550200 {ECO:0000313|EMBL:BAS90370.1}; OrderedLocusNames=Os04g0550200 {ECO:0000313|EMBL:BAF15401.1}; ORFNames=OSJNBb0034G17.6 {ECO:0000313|EMBL:CAD41604.3}, OSNPB_040550200 {ECO:0000313|EMBL:BAS90370.1};	Q7XU26_ORYSJ	Q7XU26	OSJNBb0034G17.6 protein; Os04g0550200 protein; Transcription factor; cDNA clone:002-143-E08, full insert sequence	SubName: Full=OSJNBb0034G17.6 protein {ECO:0000313|EMBL:CAD41604.3}; SubName: Full=Os04g0550200 protein {ECO:0000313|EMBL:BAF15401.1}; SubName: Full=Transcription factor {ECO:0000313|EMBL:AAP83324.1}; SubName: Full=cDNA clone:002-143-E08, full insert sequence {ECO:0000313|EMBL:BAG98412.1};	osa:4336587	IPR001471;IPR036955;IPR016177	XP_015634439.1	ENOG410IY7W;ENOG410YIZG	EOG09360N5C	PF00847	PS51032
	TRINITY_DN32033_c0_g1_i2	sp|P53496|ACT11_ARATH	Arabidopsis thaliana (Mouse-ear cress)	ACT11 At3g12110 T21B14.7, T21B14_108, T23B7.5	Name=ACT11; OrderedLocusNames=At3g12110; ORFNames=T21B14.7, T21B14_108, T23B7.5;	ACT11_ARATH	P53496	Actin-11	RecName: Full=Actin-11;	ath:AT3G12110	IPR004000;IPR020902;IPR004001	NP_187818.1	KOG0676;COG5277	EOG09360BTG	PF00022	PS00406;PS00432;PS01132	PTHR11937
	TRINITY_DN32033_c0_g2_i1	sp|P20359|ACTG_EMENI	Emericella nidulans (strain FGSC A4 / ATCC 38163 / CBS 112.46 / NRRL 194 / M139) (Aspergillus nidulans)	acnA AN6542	Name=acnA; ORFNames=AN6542;	ACTG_EMENI	P20359	Actin, gamma	RecName: Full=Actin, gamma;	ani:AN6542.2	IPR004000;IPR020902;IPR004001	XP_664146.1		EOG092C2KFK	PF00022	PS00406;PS00432;PS01132	PTHR11937
	TRINITY_DN32033_c0_g3_i1	tr|C3ZHN4|C3ZHN4_BRAFL	Branchiostoma floridae (Florida lancelet) (Amphioxus)	BRAFLDRAFT_79607	ORFNames=BRAFLDRAFT_79607 {ECO:0000313|EMBL:EEN48029.1};	C3ZHN4_BRAFL	C3ZHN4	Uncharacterized protein	SubName: Full=Uncharacterized protein {ECO:0000313|EMBL:EEN48029.1};	bfo:BRAFLDRAFT_79607	IPR004000;IPR020902;IPR004001	XP_002592018.1	KOG0676;COG5277		PF00022	PS00406;PS00432;PS01132	PTHR11937
	TRINITY_DN32018_c0_g2_i2	tr|A0A1U8BMW6|A0A1U8BMW6_NELNU	Nelumbo nucifera (Sacred lotus)	LOC104612828	Name=LOC104612828 {ECO:0000313|RefSeq:XP_010278719.1};	A0A1U8BMW6_NELNU	A0A1U8BMW6	uncharacterized protein LOC104612828	SubName: Full=uncharacterized protein LOC104612828 {ECO:0000313|RefSeq:XP_010278719.1};	nnu:104612828	IPR001584;IPR005162;IPR012337;IPR036397	XP_010278719.1			PF03732;PF00665	PS50994
	TRINITY_DN24611_c0_g1_i2	tr|A0A1E7FAU0|A0A1E7FAU0_9STRA	Fragilariopsis cylindrus CCMP1102	Chk2a FRACYDRAFT_269308	Name=Chk2a {ECO:0000313|EMBL:OEU15300.1}; ORFNames=FRACYDRAFT_269308 {ECO:0000313|EMBL:OEU15300.1};	A0A1E7FAU0_9STRA	A0A1E7FAU0	Kinase domain-containing protein	SubName: Full=Kinase domain-containing protein {ECO:0000313|EMBL:OEU15300.1};	fcy:FRACYDRAFT_269308	IPR011009;IPR000719;IPR017441;IPR008271				PF00069	PS00107;PS50011;PS00108
	TRINITY_DN24611_c0_g1_i1	tr|A0A1E7FAU0|A0A1E7FAU0_9STRA	Fragilariopsis cylindrus CCMP1102	Chk2a FRACYDRAFT_269308	Name=Chk2a {ECO:0000313|EMBL:OEU15300.1}; ORFNames=FRACYDRAFT_269308 {ECO:0000313|EMBL:OEU15300.1};	A0A1E7FAU0_9STRA	A0A1E7FAU0	Kinase domain-containing protein	SubName: Full=Kinase domain-containing protein {ECO:0000313|EMBL:OEU15300.1};	fcy:FRACYDRAFT_269308	IPR011009;IPR000719;IPR017441;IPR008271				PF00069	PS00107;PS50011;PS00108
	TRINITY_DN24679_c0_g2_i6	tr|K3YYH1|K3YYH1_SETIT	Setaria italica (Foxtail millet) (Panicum italicum)	LOC101775424 SETIT_019324mg	Name=LOC101775424 {ECO:0000313|EnsemblPlants:Si019324m}; ORFNames=SETIT_019324mg {ECO:0000313|EMBL:KQL28745.1};	K3YYH1_SETIT	K3YYH1	Uncharacterized protein	SubName: Full=Uncharacterized protein {ECO:0000313|EMBL:KQL28745.1, ECO:0000313|EnsemblPlants:Si019324m};	sita:101775424		XP_004951895.1	ENOG410IWTY;ENOG410Y5EH	EOG09360O1V
	TRINITY_DN24635_c0_g1_i6	tr|F6REW5|F6REW5_CALJA	Callithrix jacchus (White-tufted-ear marmoset)	LOC100411827	Name=LOC100411827 {ECO:0000313|Ensembl:ENSCJAP00000048706};	F6REW5_CALJA	F6REW5	Uncharacterized protein	SubName: Full=Uncharacterized protein {ECO:0000313|Ensembl:ENSCJAP00000048706};	cjc:100411827	IPR001975;IPR019956;IPR029071;IPR019954;IPR000626	XP_002756700.2	KOG0003;COG1552;COG5272	EOG091G178I	PF01020;PF00240	PS00299;PS50053
	TRINITY_DN24635_c0_g1_i2	tr|A0A1S4CB03|A0A1S4CB03_TOBAC	Nicotiana tabacum (Common tobacco)	LOC107816905	Name=LOC107816905 {ECO:0000313|RefSeq:XP_016498139.1};	A0A1S4CB03_TOBAC	A0A1S4CB03	polyubiquitin 4-like	SubName: Full=polyubiquitin 4-like {ECO:0000313|RefSeq:XP_016498139.1};	nta:107816905	IPR019956;IPR029071;IPR019954;IPR000626	XP_016498139.1			PF00240	PS00299;PS50053
	TRINITY_DN24658_c0_g1_i3	tr|J3MBQ0|J3MBQ0_ORYBR	Oryza brachyantha (malo sina)	102718842	Name=102718842 {ECO:0000313|EnsemblPlants:OB06G14440.1};	J3MBQ0_ORYBR	J3MBQ0	Uncharacterized protein	SubName: Full=Uncharacterized protein {ECO:0000313|EnsemblPlants:OB06G14440.1};	obr:102718842	IPR013785;IPR017853;IPR008811	XP_015693741.1	ENOG410IH7P;ENOG410YBU9	EOG093603F4	PF05691		PTHR31268
	TRINITY_DN24676_c0_g1_i1	tr|A0A060P735|A0A060P735_9BURK	Burkholderia sp. RPE67	BRPE67_ACDS23800, BRPE67_ACDS24320, BRPE67_ACDS25430	ORFNames=BRPE67_ACDS23800 {ECO:0000313|EMBL:BAO87435.1}, BRPE67_ACDS24320 {ECO:0000313|EMBL:BAO87487.1}, BRPE67_ACDS25430 {ECO:0000313|EMBL:BAO87598.1};	A0A060P735_9BURK	A0A060P735	Putative membrane protein	SubName: Full=Putative membrane protein {ECO:0000313|EMBL:BAO87598.1};	bue:BRPE67_ACDS23800;bue:BRPE67_ACDS24320;bue:BRPE67_ACDS25430
	TRINITY_DN61208_c0_g1_i1	tr|I0YL40|I0YL40_COCSC	Coccomyxa subellipsoidea (strain C-169) (Green microalga)	COCSUDRAFT_20022	ORFNames=COCSUDRAFT_20022 {ECO:0000313|EMBL:EIE19109.1};	I0YL40_COCSC	I0YL40	60S ribosomal protein L7	SubName: Full=60S ribosomal protein L7 {ECO:0000313|EMBL:EIE19109.1};	csl:COCSUDRAFT_20022	IPR036919;IPR018038;IPR016082;IPR012988;IPR005998;IPR035808	XP_005643653.1			PF00327;PF08079	PS00634		TIGR01310
	TRINITY_DN61204_c0_g1_i3	tr|F0YHP9|F0YHP9_AURAN	Aureococcus anophagefferens (Harmful bloom alga)	PLS1 AURANDRAFT_54716	Name=PLS1 {ECO:0000313|EMBL:EGB05384.1}; ORFNames=AURANDRAFT_54716 {ECO:0000313|EMBL:EGB05384.1};	F0YHP9_AURAN	F0YHP9	Phospholipid scramblase	RecName: Full=Phospholipid scramblase {ECO:0000256|RuleBase:RU363116}; Flags: Fragment;	aaf:AURANDRAFT_54716	IPR005552	XP_009040029.1			PF03803		PTHR23248
	TRINITY_DN61204_c0_g1_i2	tr|F0YHP9|F0YHP9_AURAN	Aureococcus anophagefferens (Harmful bloom alga)	PLS1 AURANDRAFT_54716	Name=PLS1 {ECO:0000313|EMBL:EGB05384.1}; ORFNames=AURANDRAFT_54716 {ECO:0000313|EMBL:EGB05384.1};	F0YHP9_AURAN	F0YHP9	Phospholipid scramblase	RecName: Full=Phospholipid scramblase {ECO:0000256|RuleBase:RU363116}; Flags: Fragment;	aaf:AURANDRAFT_54716	IPR005552	XP_009040029.1			PF03803		PTHR23248
	TRINITY_DN61277_c0_g1_i1	sp|P54632|1433_DICDI	Dictyostelium discoideum (Slime mold)	fttB DDB_G0269138	Name=fttB; ORFNames=DDB_G0269138;	1433_DICDI	P54632	14-3-3-like protein	RecName: Full=14-3-3-like protein;	ddi:DDB_G0269138	IPR000308;IPR023409;IPR036815;IPR023410	XP_001134475.1	KOG0841;COG5040		PF00244	PS00796;PS00797	PTHR18860
	TRINITY_DN73350_c0_g1_i1	sp|A8N0V8|GET3_COPC7	Coprinopsis cinerea (strain Okayama-7 / 130 / ATCC MYA-4618 / FGSC 9003) (Inky cap fungus) (Hormographiella aspergillata)	GET3 CC1G_08655	Name=GET3 {ECO:0000255|HAMAP-Rule:MF_03112}; ORFNames=CC1G_08655;	GET3_COPC7	A8N0V8	ATPase GET3; Arsenical pump-driving ATPase; Arsenite-stimulated ATPase; Golgi to ER traffic protein 3; Guided entry of tail-anchored proteins 3	RecName: Full=ATPase GET3 {ECO:0000255|HAMAP-Rule:MF_03112}; EC=3.6.-.- {ECO:0000255|HAMAP-Rule:MF_03112}; AltName: Full=Arsenical pump-driving ATPase {ECO:0000255|HAMAP-Rule:MF_03112}; AltName: Full=Arsenite-stimulated ATPase {ECO:0000255|HAMAP-Rule:MF_03112}; AltName: Full=Golgi to ER traffic protein 3 {ECO:0000255|HAMAP-Rule:MF_03112}; AltName: Full=Guided entry of tail-anchored proteins 3 {EC…	cci:CC1G_08655	IPR025723;IPR016300;IPR027542;IPR027417	XP_001828509.1	KOG2825;COG0003	EOG092C33XF	PF02374		PTHR10803;PTHR10803:SF3	TIGR00345
	TRINITY_DN73350_c0_g1_i3	tr|B8BXZ3|B8BXZ3_THAPS	Thalassiosira pseudonana (Marine diatom) (Cyclotella nana)	THAPSDRAFT_33256	ORFNames=THAPSDRAFT_33256 {ECO:0000313|EMBL:EED93795.1};	B8BXZ3_THAPS	B8BXZ3	Arsenical pump-driving ATPase	RecName: Full=Arsenical pump-driving ATPase {ECO:0000256|SAAS:SAAS00847228}; EC=3.6.-.- {ECO:0000256|SAAS:SAAS00846965}; Flags: Fragment;	tps:THAPSDRAFT_33256	IPR025723;IPR016300;IPR027542;IPR027417	XP_002288359.1	KOG2825;COG0003		PF02374		PTHR10803;PTHR10803:SF3	TIGR00345
	TRINITY_DN89159_c0_g1_i1	tr|I1HUV2|I1HUV2_BRADI	Brachypodium distachyon (Purple false brome) (Trachynia distachya)	LOC100837973 BRADI_2g59660	Name=LOC100837973 {ECO:0000313|EnsemblPlants:BRADI2G59660.1}; ORFNames=BRADI_2g59660 {ECO:0000313|EMBL:KQK11357.1};	I1HUV2_BRADI	I1HUV2	Uncharacterized protein	SubName: Full=Uncharacterized protein {ECO:0000313|EMBL:KQK11357.1, ECO:0000313|EnsemblPlants:BRADI2G59660.1};	bdi:100837973	IPR001360;IPR033132;IPR017853	XP_003564998.1	KOG0626;COG2723	EOG0936071L	PF00232	PS00653	PTHR10353
	TRINITY_DN4085_c0_g1_i1	tr|I1HHQ3|I1HHQ3_BRADI	Brachypodium distachyon (Purple false brome) (Trachynia distachya)	LOC100838091 BRADI_2g20080	Name=LOC100838091 {ECO:0000313|EnsemblPlants:BRADI2G20080.1}; ORFNames=BRADI_2g20080 {ECO:0000313|EMBL:KQK05445.1};	I1HHQ3_BRADI	I1HHQ3	Uncharacterized protein	SubName: Full=Uncharacterized protein {ECO:0000313|EMBL:KQK05445.1, ECO:0000313|EnsemblPlants:BRADI2G20080.1};	bdi:100838091	IPR012423	XP_003568124.1	ENOG410IYWY;ENOG4112A56	EOG09360XQA	PF07904		PTHR13581
	TRINITY_DN4057_c0_g1_i1	tr|I1H1V2|I1H1V2_BRADI	Brachypodium distachyon (Purple false brome) (Trachynia distachya)	LOC100838410 BRADI_1g51650	Name=LOC100838410 {ECO:0000313|EnsemblPlants:BRADI1G51650.1}; ORFNames=BRADI_1g51650 {ECO:0000313|EMBL:KQK19982.1};	I1H1V2_BRADI	I1H1V2	Uncharacterized protein	SubName: Full=Uncharacterized protein {ECO:0000313|EMBL:KQK19982.1, ECO:0000313|EnsemblPlants:BRADI1G51650.1};	bdi:100838410	IPR001848;IPR027486;IPR036838;IPR005729	XP_003557244.1	KOG0900;COG0051	EOG09360SM2	PF00338		PTHR11700	TIGR01046
	TRINITY_DN4057_c0_g1_i6	tr|I1H1V2|I1H1V2_BRADI	Brachypodium distachyon (Purple false brome) (Trachynia distachya)	LOC100838410 BRADI_1g51650	Name=LOC100838410 {ECO:0000313|EnsemblPlants:BRADI1G51650.1}; ORFNames=BRADI_1g51650 {ECO:0000313|EMBL:KQK19982.1};	I1H1V2_BRADI	I1H1V2	Uncharacterized protein	SubName: Full=Uncharacterized protein {ECO:0000313|EMBL:KQK19982.1, ECO:0000313|EnsemblPlants:BRADI1G51650.1};	bdi:100838410	IPR001848;IPR027486;IPR036838;IPR005729	XP_003557244.1	KOG0900;COG0051	EOG09360SM2	PF00338		PTHR11700	TIGR01046
	TRINITY_DN4028_c0_g1_i9	tr|K4ABF6|K4ABF6_SETIT	Setaria italica (Foxtail millet) (Panicum italicum)	LOC101781088 SETIT_036213mg	Name=LOC101781088 {ECO:0000313|EnsemblPlants:Si036213m}; ORFNames=SETIT_036213mg {ECO:0000313|EMBL:KQK92749.1};	K4ABF6_SETIT	K4ABF6	Uncharacterized protein	SubName: Full=Uncharacterized protein {ECO:0000313|EMBL:KQK92749.1, ECO:0000313|EnsemblPlants:Si036213m};	sita:101781088	IPR011009;IPR000719;IPR017441;IPR008271	XP_004985842.1	KOG1187;COG0515	EOG093602M7	PF00069	PS00107;PS50011;PS00108
	TRINITY_DN4027_c0_g1_i4	tr|I1ISK4|I1ISK4_BRADI	Brachypodium distachyon (Purple false brome) (Trachynia distachya)	LOC100828241 BRADI_4g37210	Name=LOC100828241 {ECO:0000313|EnsemblPlants:BRADI4G37210.1}; ORFNames=BRADI_4g37210 {ECO:0000313|EMBL:KQJ91372.1};	I1ISK4_BRADI	I1ISK4	Chlorophyll a-b binding protein, chloroplastic	RecName: Full=Chlorophyll a-b binding protein, chloroplastic {ECO:0000256|RuleBase:RU363080};	bdi:100828241	IPR001344;IPR022796;IPR023329	XP_003578592.1	ENOG410IU0X;ENOG410ZHBU	EOG09360I0J	PF00504		PTHR21649
	TRINITY_DN4027_c0_g1_i8	tr|I1ISK4|I1ISK4_BRADI	Brachypodium distachyon (Purple false brome) (Trachynia distachya)	LOC100828241 BRADI_4g37210	Name=LOC100828241 {ECO:0000313|EnsemblPlants:BRADI4G37210.1}; ORFNames=BRADI_4g37210 {ECO:0000313|EMBL:KQJ91372.1};	I1ISK4_BRADI	I1ISK4	Chlorophyll a-b binding protein, chloroplastic	RecName: Full=Chlorophyll a-b binding protein, chloroplastic {ECO:0000256|RuleBase:RU363080};	bdi:100828241	IPR001344;IPR022796;IPR023329	XP_003578592.1	ENOG410IU0X;ENOG410ZHBU	EOG09360I0J	PF00504		PTHR21649
	TRINITY_DN4027_c0_g1_i3	tr|I1ISK4|I1ISK4_BRADI	Brachypodium distachyon (Purple false brome) (Trachynia distachya)	LOC100828241 BRADI_4g37210	Name=LOC100828241 {ECO:0000313|EnsemblPlants:BRADI4G37210.1}; ORFNames=BRADI_4g37210 {ECO:0000313|EMBL:KQJ91372.1};	I1ISK4_BRADI	I1ISK4	Chlorophyll a-b binding protein, chloroplastic	RecName: Full=Chlorophyll a-b binding protein, chloroplastic {ECO:0000256|RuleBase:RU363080};	bdi:100828241	IPR001344;IPR022796;IPR023329	XP_003578592.1	ENOG410IU0X;ENOG410ZHBU	EOG09360I0J	PF00504		PTHR21649
	TRINITY_DN4027_c0_g1_i2	tr|I1ISK4|I1ISK4_BRADI	Brachypodium distachyon (Purple false brome) (Trachynia distachya)	LOC100828241 BRADI_4g37210	Name=LOC100828241 {ECO:0000313|EnsemblPlants:BRADI4G37210.1}; ORFNames=BRADI_4g37210 {ECO:0000313|EMBL:KQJ91372.1};	I1ISK4_BRADI	I1ISK4	Chlorophyll a-b binding protein, chloroplastic	RecName: Full=Chlorophyll a-b binding protein, chloroplastic {ECO:0000256|RuleBase:RU363080};	bdi:100828241	IPR001344;IPR022796;IPR023329	XP_003578592.1	ENOG410IU0X;ENOG410ZHBU	EOG09360I0J	PF00504		PTHR21649
	TRINITY_DN4027_c0_g1_i12	tr|I1ISK4|I1ISK4_BRADI	Brachypodium distachyon (Purple false brome) (Trachynia distachya)	LOC100828241 BRADI_4g37210	Name=LOC100828241 {ECO:0000313|EnsemblPlants:BRADI4G37210.1}; ORFNames=BRADI_4g37210 {ECO:0000313|EMBL:KQJ91372.1};	I1ISK4_BRADI	I1ISK4	Chlorophyll a-b binding protein, chloroplastic	RecName: Full=Chlorophyll a-b binding protein, chloroplastic {ECO:0000256|RuleBase:RU363080};	bdi:100828241	IPR001344;IPR022796;IPR023329	XP_003578592.1	ENOG410IU0X;ENOG410ZHBU	EOG09360I0J	PF00504		PTHR21649
	TRINITY_DN40555_c0_g1_i3	tr|C1DZD3|C1DZD3_MICCC	Micromonas commoda (strain RCC299 / NOUM17 / CCMP2709) (Picoplanktonic green alga)	MICPUN_107637	ORFNames=MICPUN_107637 {ECO:0000313|EMBL:ACO61583.1};	C1DZD3_MICCC	C1DZD3	Uncharacterized protein	SubName: Full=Uncharacterized protein {ECO:0000313|EMBL:ACO61583.1};	mis:MICPUN_107637	IPR033322;IPR019103;IPR021109;IPR015940;IPR009060;IPR029071;IPR000626	XP_002500325.1			PF09668;PF00627;PF00240	PS50030;PS50053	PTHR12917:SF1
	TRINITY_DN40555_c0_g1_i4	tr|C1DZD3|C1DZD3_MICCC	Micromonas commoda (strain RCC299 / NOUM17 / CCMP2709) (Picoplanktonic green alga)	MICPUN_107637	ORFNames=MICPUN_107637 {ECO:0000313|EMBL:ACO61583.1};	C1DZD3_MICCC	C1DZD3	Uncharacterized protein	SubName: Full=Uncharacterized protein {ECO:0000313|EMBL:ACO61583.1};	mis:MICPUN_107637	IPR033322;IPR019103;IPR021109;IPR015940;IPR009060;IPR029071;IPR000626	XP_002500325.1			PF09668;PF00627;PF00240	PS50030;PS50053	PTHR12917:SF1
	TRINITY_DN40575_c0_g1_i7	tr|I1GPI0|I1GPI0_BRADI	Brachypodium distachyon (Purple false brome) (Trachynia distachya)	LOC100824438	Name=LOC100824438 {ECO:0000313|EnsemblPlants:BRADI1G12267.1};	I1GPI0_BRADI	I1GPI0	Uncharacterized protein	SubName: Full=Uncharacterized protein {ECO:0000313|EnsemblPlants:BRADI1G12267.1};	bdi:100824438	IPR006912	XP_003559567.1	ENOG410IJHN;ENOG410Z1UH	EOG09360IYM	PF04827
	TRINITY_DN40575_c0_g1_i9	tr|I1GPI0|I1GPI0_BRADI	Brachypodium distachyon (Purple false brome) (Trachynia distachya)	LOC100824438	Name=LOC100824438 {ECO:0000313|EnsemblPlants:BRADI1G12267.1};	I1GPI0_BRADI	I1GPI0	Uncharacterized protein	SubName: Full=Uncharacterized protein {ECO:0000313|EnsemblPlants:BRADI1G12267.1};	bdi:100824438	IPR006912	XP_003559567.1	ENOG410IJHN;ENOG410Z1UH	EOG09360IYM	PF04827
	TRINITY_DN40575_c0_g1_i11	tr|I1GPI0|I1GPI0_BRADI	Brachypodium distachyon (Purple false brome) (Trachynia distachya)	LOC100824438	Name=LOC100824438 {ECO:0000313|EnsemblPlants:BRADI1G12267.1};	I1GPI0_BRADI	I1GPI0	Uncharacterized protein	SubName: Full=Uncharacterized protein {ECO:0000313|EnsemblPlants:BRADI1G12267.1};	bdi:100824438	IPR006912	XP_003559567.1	ENOG410IJHN;ENOG410Z1UH	EOG09360IYM	PF04827
	TRINITY_DN40575_c0_g1_i2	tr|I1GPI0|I1GPI0_BRADI	Brachypodium distachyon (Purple false brome) (Trachynia distachya)	LOC100824438	Name=LOC100824438 {ECO:0000313|EnsemblPlants:BRADI1G12267.1};	I1GPI0_BRADI	I1GPI0	Uncharacterized protein	SubName: Full=Uncharacterized protein {ECO:0000313|EnsemblPlants:BRADI1G12267.1};	bdi:100824438	IPR006912	XP_003559567.1	ENOG410IJHN;ENOG410Z1UH	EOG09360IYM	PF04827
	TRINITY_DN40575_c0_g1_i5	tr|I1GPI0|I1GPI0_BRADI	Brachypodium distachyon (Purple false brome) (Trachynia distachya)	LOC100824438	Name=LOC100824438 {ECO:0000313|EnsemblPlants:BRADI1G12267.1};	I1GPI0_BRADI	I1GPI0	Uncharacterized protein	SubName: Full=Uncharacterized protein {ECO:0000313|EnsemblPlants:BRADI1G12267.1};	bdi:100824438	IPR006912	XP_003559567.1	ENOG410IJHN;ENOG410Z1UH	EOG09360IYM	PF04827
	TRINITY_DN40575_c0_g1_i1	tr|I1GPI0|I1GPI0_BRADI	Brachypodium distachyon (Purple false brome) (Trachynia distachya)	LOC100824438	Name=LOC100824438 {ECO:0000313|EnsemblPlants:BRADI1G12267.1};	I1GPI0_BRADI	I1GPI0	Uncharacterized protein	SubName: Full=Uncharacterized protein {ECO:0000313|EnsemblPlants:BRADI1G12267.1};	bdi:100824438	IPR006912	XP_003559567.1	ENOG410IJHN;ENOG410Z1UH	EOG09360IYM	PF04827
	TRINITY_DN40575_c0_g1_i6	tr|I1GPI0|I1GPI0_BRADI	Brachypodium distachyon (Purple false brome) (Trachynia distachya)	LOC100824438	Name=LOC100824438 {ECO:0000313|EnsemblPlants:BRADI1G12267.1};	I1GPI0_BRADI	I1GPI0	Uncharacterized protein	SubName: Full=Uncharacterized protein {ECO:0000313|EnsemblPlants:BRADI1G12267.1};	bdi:100824438	IPR006912	XP_003559567.1	ENOG410IJHN;ENOG410Z1UH	EOG09360IYM	PF04827
	TRINITY_DN40575_c0_g1_i10	tr|I1GPI0|I1GPI0_BRADI	Brachypodium distachyon (Purple false brome) (Trachynia distachya)	LOC100824438	Name=LOC100824438 {ECO:0000313|EnsemblPlants:BRADI1G12267.1};	I1GPI0_BRADI	I1GPI0	Uncharacterized protein	SubName: Full=Uncharacterized protein {ECO:0000313|EnsemblPlants:BRADI1G12267.1};	bdi:100824438	IPR006912	XP_003559567.1	ENOG410IJHN;ENOG410Z1UH	EOG09360IYM	PF04827
	TRINITY_DN40575_c0_g1_i4	tr|I1GPI0|I1GPI0_BRADI	Brachypodium distachyon (Purple false brome) (Trachynia distachya)	LOC100824438	Name=LOC100824438 {ECO:0000313|EnsemblPlants:BRADI1G12267.1};	I1GPI0_BRADI	I1GPI0	Uncharacterized protein	SubName: Full=Uncharacterized protein {ECO:0000313|EnsemblPlants:BRADI1G12267.1};	bdi:100824438	IPR006912	XP_003559567.1	ENOG410IJHN;ENOG410Z1UH	EOG09360IYM	PF04827
	TRINITY_DN40588_c0_g1_i1	tr|B8CA22|B8CA22_THAPS	Thalassiosira pseudonana (Marine diatom) (Cyclotella nana)	THAPSDRAFT_36788	ORFNames=THAPSDRAFT_36788 {ECO:0000313|EMBL:EED89429.1};	B8CA22_THAPS	B8CA22	Myo-inositol-1-phosphate synthase-like protein	SubName: Full=Myo-inositol-1-phosphate synthase-like protein {ECO:0000313|EMBL:EED89429.1}; EC=5.5.1.4 {ECO:0000313|EMBL:EED89429.1}; Flags: Fragment;	tps:THAPSDRAFT_36788	IPR002587;IPR013021;IPR036291	XP_002292968.1	KOG0693;COG1260		PF01658;PF07994		PTHR11510
	TRINITY_DN40588_c0_g1_i4	tr|B8CA22|B8CA22_THAPS	Thalassiosira pseudonana (Marine diatom) (Cyclotella nana)	THAPSDRAFT_36788	ORFNames=THAPSDRAFT_36788 {ECO:0000313|EMBL:EED89429.1};	B8CA22_THAPS	B8CA22	Myo-inositol-1-phosphate synthase-like protein	SubName: Full=Myo-inositol-1-phosphate synthase-like protein {ECO:0000313|EMBL:EED89429.1}; EC=5.5.1.4 {ECO:0000313|EMBL:EED89429.1}; Flags: Fragment;	tps:THAPSDRAFT_36788	IPR002587;IPR013021;IPR036291	XP_002292968.1	KOG0693;COG1260		PF01658;PF07994		PTHR11510
	TRINITY_DN40585_c0_g1_i1	tr|I1ISA2|I1ISA2_BRADI	Brachypodium distachyon (Purple false brome) (Trachynia distachya)	LOC100833837	Name=LOC100833837 {ECO:0000313|EnsemblPlants:BRADI4G36477.1};	I1ISA2_BRADI	I1ISA2	Uncharacterized protein	SubName: Full=Uncharacterized protein {ECO:0000313|EnsemblPlants:BRADI4G36477.1};	bdi:100833837	IPR027267;IPR006868;IPR006867	XP_003578529.1	ENOG410IJDP;ENOG410YIBJ	EOG09360C5R	PF04783;PF04782
	TRINITY_DN40585_c0_g1_i2	tr|I1ISA2|I1ISA2_BRADI	Brachypodium distachyon (Purple false brome) (Trachynia distachya)	LOC100833837	Name=LOC100833837 {ECO:0000313|EnsemblPlants:BRADI4G36477.1};	I1ISA2_BRADI	I1ISA2	Uncharacterized protein	SubName: Full=Uncharacterized protein {ECO:0000313|EnsemblPlants:BRADI4G36477.1};	bdi:100833837	IPR027267;IPR006868;IPR006867	XP_003578529.1	ENOG410IJDP;ENOG410YIBJ	EOG09360C5R	PF04783;PF04782
	TRINITY_DN16327_c0_g2_i2	tr|K4AD21|K4AD21_SETIT	Setaria italica (Foxtail millet) (Panicum italicum)	LOC101773785 SETIT_036778mg	Name=LOC101773785 {ECO:0000313|EnsemblPlants:Si036778m}; ORFNames=SETIT_036778mg {ECO:0000313|EMBL:KQK91431.1};	K4AD21_SETIT	K4AD21	Uncharacterized protein	SubName: Full=Uncharacterized protein {ECO:0000313|EMBL:KQK91431.1, ECO:0000313|EnsemblPlants:Si036778m};	sita:101773785	IPR016818;IPR027799;IPR031790;IPR001841;IPR013083	XP_004984764.1	KOG3039;ENOG410XQYR	EOG09360H7Q	PF04641;PF15906	PS50089
	TRINITY_DN65434_c0_g2_i1	tr|A0A061H9Q3|A0A061H9Q3_9BASI	Anthracocystis flocculosa PF-1	PFL1_02826	ORFNames=PFL1_02826 {ECO:0000313|EMBL:EPQ29607.1};	A0A061H9Q3_9BASI	A0A061H9Q3	Uncharacterized protein	SubName: Full=Uncharacterized protein {ECO:0000313|EMBL:EPQ29607.1};	pfp:PFL1_02826	IPR027589;IPR013211	XP_007878531.1			PF08309			TIGR04312
	TRINITY_DN21965_c0_g2_i2	tr|I1I5Y7|I1I5Y7_BRADI	Brachypodium distachyon (Purple false brome) (Trachynia distachya)	LOC100846927 BRADI_3g32780	Name=LOC100846927 {ECO:0000313|EnsemblPlants:BRADI3G32780.1}; ORFNames=BRADI_3g32780 {ECO:0000313|EMBL:KQJ97713.1};	I1I5Y7_BRADI	I1I5Y7	Uncharacterized protein	SubName: Full=Uncharacterized protein {ECO:0000313|EMBL:KQJ97713.1, ECO:0000313|EnsemblPlants:BRADI3G32780.1};	bdi:100846927	IPR013026;IPR011990;IPR013105;IPR019734	XP_003572049.1	KOG1127;ENOG410ZG1H	EOG093602JI	PF07719;PF13181	PS50005;PS50293
	TRINITY_DN21901_c0_g1_i1	tr|J9JNF7|J9JNF7_ACYPI	Acyrthosiphon pisum (Pea aphid)	cprr1-8	Name=cprr1-8 {ECO:0000313|EnsemblMetazoa:ACYPI001775-PA};	J9JNF7_ACYPI	J9JNF7	Uncharacterized protein	SubName: Full=Uncharacterized protein {ECO:0000313|EnsemblMetazoa:ACYPI001775-PA};	api:100160480	IPR031311;IPR000618	NP_001165732.1			PF00379	PS00233;PS51155
	TRINITY_DN21973_c0_g1_i7	tr|C5YQR0|C5YQR0_SORBI	Sorghum bicolor (Sorghum) (Sorghum vulgare)	SORBI_3008G019532	ORFNames=SORBI_3008G019532 {ECO:0000313|EMBL:EES15586.2};	C5YQR0_SORBI	C5YQR0	Uncharacterized protein	SubName: Full=Uncharacterized protein {ECO:0000313|EMBL:EES15586.2};	sbi:8071442	IPR001342;IPR036291	XP_002441748.1	KOG0455;COG0460	EOG09360FYH	PF00742
	TRINITY_DN21971_c1_g2_i1	sp|Q9SSD2|PRP8A_ARATH	Arabidopsis thaliana (Mouse-ear cress)	PRP8A EMB14, EMB177, EMB33, SOF81, SUS2 At1g80070 F18B13.15	Name=PRP8A {ECO:0000303|PubMed:19261069}; Synonyms=EMB14 {ECO:0000303|Ref.3}, EMB177 {ECO:0000303|Ref.3}, EMB33 {ECO:0000303|Ref.3}, SOF81 {ECO:0000303|PubMed:24725596}, SUS2 {ECO:0000303|Ref.3}; OrderedLocusNames=At1g80070 {ECO:0000312|Araport:AT1G80070}; ORFNames=F18B13.15 {ECO:0000312|EMBL:AAD55467.1};	PRP8A_ARATH	Q9SSD2	Pre-mRNA-processing-splicing factor 8A; PRP8 homolog A; AtPRP8A; Protein ABNORMAL SUSPENSOR 2; Protein EMBRYO DEFECTIVE 14; Protein EMBRYO DEFECTIVE 177; Protein EMBRYO DEFECTIVE 33; Protein SUPPRESSOR OF OVEREXPRESSED FCA 81	RecName: Full=Pre-mRNA-processing-splicing factor 8A {ECO:0000305}; AltName: Full=PRP8 homolog A {ECO:0000305}; Short=AtPRP8A {ECO:0000303|PubMed:19261069}; AltName: Full=Protein ABNORMAL SUSPENSOR 2 {ECO:0000303|Ref.3}; AltName: Full=Protein EMBRYO DEFECTIVE 14 {ECO:0000303|Ref.3}; AltName: Full=Protein EMBRYO DEFECTIVE 177 {ECO:0000303|Ref.3}; AltName: Full=Protein EMBRYO DEFECTIVE 33 {ECO:0000…	ath:AT1G80070	IPR000555;IPR037518;IPR012591;IPR012592;IPR012984;IPR027652;IPR021983;IPR019581;IPR019580;IPR012337;IPR019582	NP_178124.2	KOG1795;COG5178	EOG0936000U	PF01398;PF08082;PF08083;PF08084;PF12134;PF10598;PF10597;PF10596	PS50249	PTHR11140
	TRINITY_DN41520_c0_g1_i2	tr|A0A0L8HIP7|A0A0L8HIP7_OCTBM	Octopus bimaculoides (California two-spotted octopus)	OCBIM_22014638mg	ORFNames=OCBIM_22014638mg {ECO:0000313|EMBL:KOF88635.1};	A0A0L8HIP7_OCTBM	A0A0L8HIP7	Uncharacterized protein	SubName: Full=Uncharacterized protein {ECO:0000313|EMBL:KOF88635.1};	obi:106870674	IPR004918;IPR013873;IPR013874;IPR013855	XP_014772309.1;XP_014772310.1			PF08564;PF08565;PF03234		PTHR12800
	TRINITY_DN41520_c0_g1_i1	tr|A0A0L8HIP7|A0A0L8HIP7_OCTBM	Octopus bimaculoides (California two-spotted octopus)	OCBIM_22014638mg	ORFNames=OCBIM_22014638mg {ECO:0000313|EMBL:KOF88635.1};	A0A0L8HIP7_OCTBM	A0A0L8HIP7	Uncharacterized protein	SubName: Full=Uncharacterized protein {ECO:0000313|EMBL:KOF88635.1};	obi:106870674	IPR004918;IPR013873;IPR013874;IPR013855	XP_014772309.1;XP_014772310.1			PF08564;PF08565;PF03234		PTHR12800
	TRINITY_DN41534_c0_g1_i6	tr|C1MUS2|C1MUS2_MICPC	Micromonas pusilla (strain CCMP1545) (Picoplanktonic green alga)	MICPUCDRAFT_27327	ORFNames=MICPUCDRAFT_27327 {ECO:0000313|EMBL:EEH56680.1};	C1MUS2_MICPC	C1MUS2	Predicted protein	SubName: Full=Predicted protein {ECO:0000313|EMBL:EEH56680.1};	mpp:MICPUCDRAFT_27327	IPR005937;IPR003593;IPR003959;IPR003960;IPR027417;IPR035256	XP_003059548.1			PF00004	PS00674	PTHR23073:SF8	TIGR01242
	TRINITY_DN41534_c0_g1_i7	sp|P54778|PRS6B_SOLTU	Solanum tuberosum (Potato)			PRS6B_SOLTU	P54778	26S proteasome regulatory subunit 6B homolog	RecName: Full=26S proteasome regulatory subunit 6B homolog;	sot:102577768	IPR005937;IPR003593;IPR003959;IPR003960;IPR029067;IPR027417;IPR035256	NP_001275060.1	KOG0727;COG1222		PF00004	PS00674	PTHR23073:SF8	TIGR01242
	TRINITY_DN64551_c0_g1_i2	tr|I1I373|I1I373_BRADI	Brachypodium distachyon (Purple false brome) (Trachynia distachya)	LOC100829115 BRADI_3g21944	Name=LOC100829115 {ECO:0000313|EnsemblPlants:BRADI3G21944.1}; ORFNames=BRADI_3g21944 {ECO:0000313|EMBL:KQJ96250.1};	I1I373_BRADI	I1I373	Uncharacterized protein	SubName: Full=Uncharacterized protein {ECO:0000313|EMBL:KQJ96250.1, ECO:0000313|EnsemblPlants:BRADI3G21944.1};	bdi:100829115		XP_003573777.1	ENOG410JTAQ;ENOG4110813
	TRINITY_DN5313_c0_g1_i5	tr|I1I319|I1I319_BRADI	Brachypodium distachyon (Purple false brome) (Trachynia distachya)	LOC100845610 BRADI_3g21360	Name=LOC100845610 {ECO:0000313|EnsemblPlants:BRADI3G21360.1}; ORFNames=BRADI_3g21360 {ECO:0000313|EMBL:KQJ96167.1};	I1I319_BRADI	I1I319	Uncharacterized protein	SubName: Full=Uncharacterized protein {ECO:0000313|EMBL:KQJ96167.1, ECO:0000313|EnsemblPlants:BRADI3G21360.1};	bdi:100845610	IPR035979;IPR000504;IPR034143;IPR022023	XP_003573746.1	KOG0113;COG0724	EOG09360JBB	PF00076;PF12220	PS50102
	TRINITY_DN5370_c0_g2_i4	tr|I1I299|I1I299_BRADI	Brachypodium distachyon (Purple false brome) (Trachynia distachya)	LOC100825118 BRADI_3g18890	Name=LOC100825118 {ECO:0000313|EnsemblPlants:BRADI3G18890.1}; ORFNames=BRADI_3g18890 {ECO:0000313|EMBL:KQJ95767.1};	I1I299_BRADI	I1I299	Uncharacterized protein	SubName: Full=Uncharacterized protein {ECO:0000313|EMBL:KQJ95767.1, ECO:0000313|EnsemblPlants:BRADI3G18890.1};	bdi:100825118	IPR036412;IPR006439;IPR023214;IPR023198	XP_003573598.1	KOG2914;COG0637	EOG09360M39				TIGR01509
	TRINITY_DN5370_c0_g2_i2	tr|I1I299|I1I299_BRADI	Brachypodium distachyon (Purple false brome) (Trachynia distachya)	LOC100825118 BRADI_3g18890	Name=LOC100825118 {ECO:0000313|EnsemblPlants:BRADI3G18890.1}; ORFNames=BRADI_3g18890 {ECO:0000313|EMBL:KQJ95767.1};	I1I299_BRADI	I1I299	Uncharacterized protein	SubName: Full=Uncharacterized protein {ECO:0000313|EMBL:KQJ95767.1, ECO:0000313|EnsemblPlants:BRADI3G18890.1};	bdi:100825118	IPR036412;IPR006439;IPR023214;IPR023198	XP_003573598.1	KOG2914;COG0637	EOG09360M39				TIGR01509
	TRINITY_DN30679_c0_g2_i3	tr|I1ICS3|I1ICS3_BRADI	Brachypodium distachyon (Purple false brome) (Trachynia distachya)	LOC100831247 BRADI_3g52130	Name=LOC100831247 {ECO:0000313|EnsemblPlants:BRADI3G52130.1}; ORFNames=BRADI_3g52130 {ECO:0000313|EMBL:KQK00836.1};	I1ICS3_BRADI	I1ICS3	Uncharacterized protein	SubName: Full=Uncharacterized protein {ECO:0000313|EMBL:KQK00836.1, ECO:0000313|EnsemblPlants:BRADI3G52130.1};	bdi:100831247	IPR036168;IPR001392;IPR018240;IPR011012;IPR028565	XP_003570135.1	KOG0938;ENOG410XPFS	EOG093609TN	PF00928	PS00990;PS51072
	TRINITY_DN30679_c0_g2_i5	tr|A0A1U8LAL9|A0A1U8LAL9_GOSHI	Gossypium hirsutum (Upland cotton) (Gossypium mexicanum)	LOC107924474 LOC107912188	Name=LOC107924474 {ECO:0000313|RefSeq:XP_016710423.1}; Synonyms=LOC107912188 {ECO:0000313|RefSeq:XP_016695750.1};	A0A1U8LAL9_GOSHI	A0A1U8LAL9	AP-2 complex subunit mu-like	SubName: Full=AP-2 complex subunit mu-like {ECO:0000313|RefSeq:XP_016695750.1, ECO:0000313|RefSeq:XP_016710423.1};	ghi:107912188;ghi:107924474	IPR036168;IPR001392;IPR018240;IPR011012;IPR028565	XP_016695750.1;XP_016710423.1			PF00928	PS00990;PS51072
	TRINITY_DN30671_c0_g2_i1	tr|I1IG42|I1IG42_BRADI	Brachypodium distachyon (Purple false brome) (Trachynia distachya)	LOC100829120 BRADI_4g00730	Name=LOC100829120 {ECO:0000313|EnsemblPlants:BRADI4G00730.1}; ORFNames=BRADI_4g00730 {ECO:0000313|EMBL:KQJ85627.1};	I1IG42_BRADI	I1IG42	Uncharacterized protein	SubName: Full=Uncharacterized protein {ECO:0000313|EMBL:KQJ85627.1, ECO:0000313|EnsemblPlants:BRADI4G00730.1};	bdi:100829120	IPR011989;IPR016024;IPR001494;IPR027140	XP_003575505.1;XP_014758704.1	KOG1241;COG5215	EOG093601SN	PF03810	PS50166	PTHR10527:SF44
	TRINITY_DN30671_c0_g2_i3	tr|I1IG42|I1IG42_BRADI	Brachypodium distachyon (Purple false brome) (Trachynia distachya)	LOC100829120 BRADI_4g00730	Name=LOC100829120 {ECO:0000313|EnsemblPlants:BRADI4G00730.1}; ORFNames=BRADI_4g00730 {ECO:0000313|EMBL:KQJ85627.1};	I1IG42_BRADI	I1IG42	Uncharacterized protein	SubName: Full=Uncharacterized protein {ECO:0000313|EMBL:KQJ85627.1, ECO:0000313|EnsemblPlants:BRADI4G00730.1};	bdi:100829120	IPR011989;IPR016024;IPR001494;IPR027140	XP_003575505.1;XP_014758704.1	KOG1241;COG5215	EOG093601SN	PF03810	PS50166	PTHR10527:SF44
	TRINITY_DN30671_c0_g2_i2	tr|I1IG42|I1IG42_BRADI	Brachypodium distachyon (Purple false brome) (Trachynia distachya)	LOC100829120 BRADI_4g00730	Name=LOC100829120 {ECO:0000313|EnsemblPlants:BRADI4G00730.1}; ORFNames=BRADI_4g00730 {ECO:0000313|EMBL:KQJ85627.1};	I1IG42_BRADI	I1IG42	Uncharacterized protein	SubName: Full=Uncharacterized protein {ECO:0000313|EMBL:KQJ85627.1, ECO:0000313|EnsemblPlants:BRADI4G00730.1};	bdi:100829120	IPR011989;IPR016024;IPR001494;IPR027140	XP_003575505.1;XP_014758704.1	KOG1241;COG5215	EOG093601SN	PF03810	PS50166	PTHR10527:SF44
	TRINITY_DN3820_c0_g2_i4	tr|A0A0Q3HE10|A0A0Q3HE10_BRADI	Brachypodium distachyon (Purple false brome) (Trachynia distachya)	BRADI_1g58180	ORFNames=BRADI_1g58180 {ECO:0000313|EMBL:KQK21016.1};	A0A0Q3HE10_BRADI	A0A0Q3HE10	Uncharacterized protein	SubName: Full=Uncharacterized protein {ECO:0000313|EMBL:KQK21016.1};	bdi:100828224	IPR002687;IPR036070;IPR012976;IPR027105;IPR019175	XP_010228422.1			PF01798;PF09785	PS51358	PTHR13904
	TRINITY_DN3895_c0_g1_i2	tr|I1GPT1|I1GPT1_BRADI	Brachypodium distachyon (Purple false brome) (Trachynia distachya)	LOC100842099 BRADI_1g13090	Name=LOC100842099 {ECO:0000313|EnsemblPlants:BRADI1G13090.1}; ORFNames=BRADI_1g13090 {ECO:0000313|EMBL:KQK13880.1};	I1GPT1_BRADI	I1GPT1	Tubulin beta chain	RecName: Full=Tubulin beta chain {ECO:0000256|RuleBase:RU000352};	bdi:100842099	IPR013838;IPR002453;IPR008280;IPR000217;IPR018316;IPR037103;IPR036525;IPR017975;IPR003008	XP_003561542.1	KOG1375;COG5023	EOG093609SQ	PF00091;PF03953	PS00227;PS00228	PTHR11588
	TRINITY_DN3895_c0_g1_i4	tr|I1GPT1|I1GPT1_BRADI	Brachypodium distachyon (Purple false brome) (Trachynia distachya)	LOC100842099 BRADI_1g13090	Name=LOC100842099 {ECO:0000313|EnsemblPlants:BRADI1G13090.1}; ORFNames=BRADI_1g13090 {ECO:0000313|EMBL:KQK13880.1};	I1GPT1_BRADI	I1GPT1	Tubulin beta chain	RecName: Full=Tubulin beta chain {ECO:0000256|RuleBase:RU000352};	bdi:100842099	IPR013838;IPR002453;IPR008280;IPR000217;IPR018316;IPR037103;IPR036525;IPR017975;IPR003008	XP_003561542.1	KOG1375;COG5023	EOG093609SQ	PF00091;PF03953	PS00227;PS00228	PTHR11588
	TRINITY_DN3895_c0_g1_i5	tr|I1GPT1|I1GPT1_BRADI	Brachypodium distachyon (Purple false brome) (Trachynia distachya)	LOC100842099 BRADI_1g13090	Name=LOC100842099 {ECO:0000313|EnsemblPlants:BRADI1G13090.1}; ORFNames=BRADI_1g13090 {ECO:0000313|EMBL:KQK13880.1};	I1GPT1_BRADI	I1GPT1	Tubulin beta chain	RecName: Full=Tubulin beta chain {ECO:0000256|RuleBase:RU000352};	bdi:100842099	IPR013838;IPR002453;IPR008280;IPR000217;IPR018316;IPR037103;IPR036525;IPR017975;IPR003008	XP_003561542.1	KOG1375;COG5023	EOG093609SQ	PF00091;PF03953	PS00227;PS00228	PTHR11588
	TRINITY_DN77994_c0_g1_i1	tr|E1Z265|E1Z265_CHLVA	Chlorella variabilis (Green alga)	CHLNCDRAFT_133025	ORFNames=CHLNCDRAFT_133025 {ECO:0000313|EMBL:EFN59945.1};	E1Z265_CHLVA	E1Z265	Uncharacterized protein	SubName: Full=Uncharacterized protein {ECO:0000313|EMBL:EFN59945.1};	cvr:CHLNCDRAFT_133025	IPR029062;IPR015527;IPR011697	XP_005852047.1			PF07722	PS51275	PTHR11315
	TRINITY_DN77994_c0_g1_i3	tr|E1Z265|E1Z265_CHLVA	Chlorella variabilis (Green alga)	CHLNCDRAFT_133025	ORFNames=CHLNCDRAFT_133025 {ECO:0000313|EMBL:EFN59945.1};	E1Z265_CHLVA	E1Z265	Uncharacterized protein	SubName: Full=Uncharacterized protein {ECO:0000313|EMBL:EFN59945.1};	cvr:CHLNCDRAFT_133025	IPR029062;IPR015527;IPR011697	XP_005852047.1			PF07722	PS51275	PTHR11315
	TRINITY_DN77994_c0_g1_i2	tr|E1Z265|E1Z265_CHLVA	Chlorella variabilis (Green alga)	CHLNCDRAFT_133025	ORFNames=CHLNCDRAFT_133025 {ECO:0000313|EMBL:EFN59945.1};	E1Z265_CHLVA	E1Z265	Uncharacterized protein	SubName: Full=Uncharacterized protein {ECO:0000313|EMBL:EFN59945.1};	cvr:CHLNCDRAFT_133025	IPR029062;IPR015527;IPR011697	XP_005852047.1			PF07722	PS51275	PTHR11315
	TRINITY_DN77914_c0_g1_i3	tr|A2FGC0|A2FGC0_TRIVA	Trichomonas vaginalis	TVAG_265550	ORFNames=TVAG_265550 {ECO:0000313|EMBL:EAX96066.1};	A2FGC0_TRIVA	A2FGC0	DnaJ domain containing protein	SubName: Full=DnaJ domain containing protein {ECO:0000313|EMBL:EAX96066.1};	tva:TVAG_265550	IPR036869;IPR001623;IPR018253	XP_001308996.1	KOG0714;COG0484		PF00226	PS00636;PS50076
	TRINITY_DN77914_c0_g1_i5	tr|A2FGC0|A2FGC0_TRIVA	Trichomonas vaginalis	TVAG_265550	ORFNames=TVAG_265550 {ECO:0000313|EMBL:EAX96066.1};	A2FGC0_TRIVA	A2FGC0	DnaJ domain containing protein	SubName: Full=DnaJ domain containing protein {ECO:0000313|EMBL:EAX96066.1};	tva:TVAG_265550	IPR036869;IPR001623;IPR018253	XP_001308996.1	KOG0714;COG0484		PF00226	PS00636;PS50076
	TRINITY_DN77914_c0_g1_i2	tr|A2FGC0|A2FGC0_TRIVA	Trichomonas vaginalis	TVAG_265550	ORFNames=TVAG_265550 {ECO:0000313|EMBL:EAX96066.1};	A2FGC0_TRIVA	A2FGC0	DnaJ domain containing protein	SubName: Full=DnaJ domain containing protein {ECO:0000313|EMBL:EAX96066.1};	tva:TVAG_265550	IPR036869;IPR001623;IPR018253	XP_001308996.1	KOG0714;COG0484		PF00226	PS00636;PS50076
	TRINITY_DN77973_c0_g1_i1	tr|C1E6E4|C1E6E4_MICCC	Micromonas commoda (strain RCC299 / NOUM17 / CCMP2709) (Picoplanktonic green alga)	MICPUN_94241	ORFNames=MICPUN_94241 {ECO:0000313|EMBL:ACO63798.1};	C1E6E4_MICCC	C1E6E4	H+-translocating pyrophosphatase family	SubName: Full=H+-translocating pyrophosphatase family {ECO:0000313|EMBL:ACO63798.1};	mis:MICPUN_94241	IPR004131	XP_002502540.1			PF03030		PTHR31998	TIGR01104
	TRINITY_DN87077_c0_g1_i1	tr|A0A1S2YFY5|A0A1S2YFY5_CICAR	Cicer arietinum (Chickpea) (Garbanzo)	LOC101504938	Name=LOC101504938 {ECO:0000313|RefSeq:XP_004504229.1};	A0A1S2YFY5_CICAR	A0A1S2YFY5	actin-depolymerizing factor 1-like	SubName: Full=actin-depolymerizing factor 1-like {ECO:0000313|RefSeq:XP_004504229.1};	cam:101504938	IPR002108;IPR029006;IPR017904	XP_004504229.1			PF00241	PS51263	PTHR11913
	TRINITY_DN87013_c0_g2_i1	tr|M5WTC8|M5WTC8_PRUPE	Prunus persica (Peach) (Amygdalus persica)	PRUPE_3G248200, PRUPE_ppa004594mg	ORFNames=PRUPE_3G248200 {ECO:0000313|EMBL:ONI18931.1}, PRUPE_ppa004594mg {ECO:0000313|EMBL:EMJ16466.1};	M5WTC8_PRUPE	M5WTC8	Uncharacterized protein	SubName: Full=Uncharacterized protein {ECO:0000313|EMBL:EMJ16466.1};	pper:18782375	IPR024709;IPR019378	XP_007215267.1		EOG093607N5	PF10250
	TRINITY_DN87010_c0_g1_i4	tr|I1IEH1|I1IEH1_BRADI	Brachypodium distachyon (Purple false brome) (Trachynia distachya)			I1IEH1_BRADI	I1IEH1	Uncharacterized protein	SubName: Full=Uncharacterized protein {ECO:0000313|EnsemblPlants:BRADI3G56860.1};	bdi:100839926		XP_010236024.1		EOG09360SS2
	TRINITY_DN87010_c0_g3_i1	tr|I1HDI4|I1HDI4_BRADI	Brachypodium distachyon (Purple false brome) (Trachynia distachya)	LOC100834784	Name=LOC100834784 {ECO:0000313|EnsemblPlants:BRADI2G07670.1};	I1HDI4_BRADI	I1HDI4	Uncharacterized protein	SubName: Full=Uncharacterized protein {ECO:0000313|EnsemblPlants:BRADI2G07670.1};	bdi:100834784	IPR006912	XP_003565518.1	ENOG410IJHN;ENOG410Z1UH	EOG09360YRM	PF04827
	TRINITY_DN87010_c0_g3_i2	tr|I1HDI4|I1HDI4_BRADI	Brachypodium distachyon (Purple false brome) (Trachynia distachya)	LOC100834784	Name=LOC100834784 {ECO:0000313|EnsemblPlants:BRADI2G07670.1};	I1HDI4_BRADI	I1HDI4	Uncharacterized protein	SubName: Full=Uncharacterized protein {ECO:0000313|EnsemblPlants:BRADI2G07670.1};	bdi:100834784	IPR006912	XP_003565518.1	ENOG410IJHN;ENOG410Z1UH	EOG09360YRM	PF04827
	TRINITY_DN87010_c0_g2_i5	tr|I1HDI4|I1HDI4_BRADI	Brachypodium distachyon (Purple false brome) (Trachynia distachya)	LOC100834784	Name=LOC100834784 {ECO:0000313|EnsemblPlants:BRADI2G07670.1};	I1HDI4_BRADI	I1HDI4	Uncharacterized protein	SubName: Full=Uncharacterized protein {ECO:0000313|EnsemblPlants:BRADI2G07670.1};	bdi:100834784	IPR006912	XP_003565518.1	ENOG410IJHN;ENOG410Z1UH	EOG09360YRM	PF04827
	TRINITY_DN87010_c0_g2_i4	tr|I1HDI4|I1HDI4_BRADI	Brachypodium distachyon (Purple false brome) (Trachynia distachya)	LOC100834784	Name=LOC100834784 {ECO:0000313|EnsemblPlants:BRADI2G07670.1};	I1HDI4_BRADI	I1HDI4	Uncharacterized protein	SubName: Full=Uncharacterized protein {ECO:0000313|EnsemblPlants:BRADI2G07670.1};	bdi:100834784	IPR006912	XP_003565518.1	ENOG410IJHN;ENOG410Z1UH	EOG09360YRM	PF04827
	TRINITY_DN87010_c0_g2_i3	tr|I1IEH1|I1IEH1_BRADI	Brachypodium distachyon (Purple false brome) (Trachynia distachya)			I1IEH1_BRADI	I1IEH1	Uncharacterized protein	SubName: Full=Uncharacterized protein {ECO:0000313|EnsemblPlants:BRADI3G56860.1};	bdi:100839926		XP_010236024.1		EOG09360SS2
	TRINITY_DN80628_c0_g1_i1	tr|B0TIG5|B0TIG5_HELMI	Heliobacterium modesticaldum (strain ATCC 51547 / Ice1)	HM1_3148	ORFNames=HM1_3148 {ECO:0000313|EMBL:ABZ84906.1};	B0TIG5_HELMI	B0TIG5	Uncharacterized protein	SubName: Full=Uncharacterized protein {ECO:0000313|EMBL:ABZ84906.1};	hmo:HM1_3148			ENOG4105MTS;ENOG4111VRG	POG091H3Z7Q
	TRINITY_DN65688_c0_g1_i1	tr|D0NAY8|D0NAY8_PHYIT	Phytophthora infestans (strain T30-4) (Potato late blight fungus)	PITG_08579	ORFNames=PITG_08579 {ECO:0000313|EMBL:EEY54996.1};	D0NAY8_PHYIT	D0NAY8	Isoleucyl-tRNA synthetase	SubName: Full=Isoleucyl-tRNA synthetase {ECO:0000313|EMBL:EEY54996.1};	pif:PITG_08579	IPR002300;IPR033709;IPR002301;IPR023586;IPR013155;IPR014729;IPR009080;IPR009008	XP_002903941.1			PF08264;PF00133			TIGR00392
	TRINITY_DN65663_c0_g1_i1	tr|A7RNM7|A7RNM7_NEMVE	Nematostella vectensis (Starlet sea anemone)	v1g87987	ORFNames=v1g87987 {ECO:0000313|EMBL:EDO46954.1};	A7RNM7_NEMVE	A7RNM7	Predicted protein	SubName: Full=Predicted protein {ECO:0000313|EMBL:EDO46954.1}; Flags: Fragment;	nve:NEMVE_v1g87987	IPR034223;IPR036990;IPR003146;IPR009020;IPR000834	XP_001639017.1	KOG2650;COG2866	EOG091G0HUI	PF00246;PF02244	PS00132
	TRINITY_DN65663_c0_g1_i2	tr|A7RNM7|A7RNM7_NEMVE	Nematostella vectensis (Starlet sea anemone)	v1g87987	ORFNames=v1g87987 {ECO:0000313|EMBL:EDO46954.1};	A7RNM7_NEMVE	A7RNM7	Predicted protein	SubName: Full=Predicted protein {ECO:0000313|EMBL:EDO46954.1}; Flags: Fragment;	nve:NEMVE_v1g87987	IPR034223;IPR036990;IPR003146;IPR009020;IPR000834	XP_001639017.1	KOG2650;COG2866	EOG091G0HUI	PF00246;PF02244	PS00132
	TRINITY_DN65680_c0_g1_i1	tr|B8BY53|B8BY53_THAPS	Thalassiosira pseudonana (Marine diatom) (Cyclotella nana)	THAPSDRAFT_21813	ORFNames=THAPSDRAFT_21813 {ECO:0000313|EMBL:EED94318.1};	B8BY53_THAPS	B8BY53	Uncharacterized protein	SubName: Full=Uncharacterized protein {ECO:0000313|EMBL:EED94318.1};	tps:THAPSDRAFT_21813	IPR001544;IPR036038;IPR005786;IPR033939	XP_002288882.1	KOG0975;COG0115		PF01063			TIGR01123
	TRINITY_DN65664_c0_g1_i1	tr|A0A1S2XCB1|A0A1S2XCB1_CICAR	Cicer arietinum (Chickpea) (Garbanzo)	LOC101513309	Name=LOC101513309 {ECO:0000313|RefSeq:XP_004487111.1};	A0A1S2XCB1_CICAR	A0A1S2XCB1	aquaporin PIP2-7	SubName: Full=aquaporin PIP2-7 {ECO:0000313|RefSeq:XP_004487111.1};	cam:101513309	IPR023271;IPR034294;IPR000425;IPR022357	XP_004487111.1			PF00230	PS00221	PTHR19139	TIGR00861
	TRINITY_DN78538_c1_g1_i3	tr|Q10M06|Q10M06_ORYSJ	Oryza sativa subsp. japonica (Rice)	Os03g0328100 LOC_Os03g21090, Os03g0328100 OSNPB_030328100	Name=Os03g0328100 {ECO:0000313|EMBL:BAS84008.1}; OrderedLocusNames=LOC_Os03g21090 {ECO:0000313|EMBL:ABF95732.1}, Os03g0328100 {ECO:0000313|EMBL:BAF11913.1}; ORFNames=OSNPB_030328100 {ECO:0000313|EMBL:BAS84008.1};	Q10M06_ORYSJ	Q10M06	Axi 1 protein, putative, expressed; Os03g0328100 protein	SubName: Full=Axi 1 protein, putative, expressed {ECO:0000313|EMBL:ABF95732.1}; SubName: Full=Os03g0328100 protein {ECO:0000313|EMBL:BAF11913.1};	osa:4332719	IPR024709;IPR019378	XP_015629067.1;XP_015629068.1	ENOG410JWYD;ENOG41104GU	EOG093607N5	PF10250
	TRINITY_DN78538_c1_g1_i4	tr|Q10M06|Q10M06_ORYSJ	Oryza sativa subsp. japonica (Rice)	Os03g0328100 LOC_Os03g21090, Os03g0328100 OSNPB_030328100	Name=Os03g0328100 {ECO:0000313|EMBL:BAS84008.1}; OrderedLocusNames=LOC_Os03g21090 {ECO:0000313|EMBL:ABF95732.1}, Os03g0328100 {ECO:0000313|EMBL:BAF11913.1}; ORFNames=OSNPB_030328100 {ECO:0000313|EMBL:BAS84008.1};	Q10M06_ORYSJ	Q10M06	Axi 1 protein, putative, expressed; Os03g0328100 protein	SubName: Full=Axi 1 protein, putative, expressed {ECO:0000313|EMBL:ABF95732.1}; SubName: Full=Os03g0328100 protein {ECO:0000313|EMBL:BAF11913.1};	osa:4332719	IPR024709;IPR019378	XP_015629067.1;XP_015629068.1	ENOG410JWYD;ENOG41104GU	EOG093607N5	PF10250
	TRINITY_DN78538_c1_g1_i1	tr|Q10M06|Q10M06_ORYSJ	Oryza sativa subsp. japonica (Rice)	Os03g0328100 LOC_Os03g21090, Os03g0328100 OSNPB_030328100	Name=Os03g0328100 {ECO:0000313|EMBL:BAS84008.1}; OrderedLocusNames=LOC_Os03g21090 {ECO:0000313|EMBL:ABF95732.1}, Os03g0328100 {ECO:0000313|EMBL:BAF11913.1}; ORFNames=OSNPB_030328100 {ECO:0000313|EMBL:BAS84008.1};	Q10M06_ORYSJ	Q10M06	Axi 1 protein, putative, expressed; Os03g0328100 protein	SubName: Full=Axi 1 protein, putative, expressed {ECO:0000313|EMBL:ABF95732.1}; SubName: Full=Os03g0328100 protein {ECO:0000313|EMBL:BAF11913.1};	osa:4332719	IPR024709;IPR019378	XP_015629067.1;XP_015629068.1	ENOG410JWYD;ENOG41104GU	EOG093607N5	PF10250
	TRINITY_DN78533_c0_g3_i1	tr|I1H5N9|I1H5N9_BRADI	Brachypodium distachyon (Purple false brome) (Trachynia distachya)	BRADI_1g62980	ORFNames=BRADI_1g62980 {ECO:0000313|EMBL:KQK21769.1};	I1H5N9_BRADI	I1H5N9	Uncharacterized protein	SubName: Full=Uncharacterized protein {ECO:0000313|EMBL:KQK21769.1, ECO:0000313|EnsemblPlants:BRADI1G62980.1};	bdi:104582370	IPR001841;IPR013083	XP_010230158.1	KOG0800;ENOG41121N2	EOG09360Y36	PF13639	PS50089
	TRINITY_DN78519_c0_g1_i1	tr|A0A1S2XBA1|A0A1S2XBA1_CICAR	Cicer arietinum (Chickpea) (Garbanzo)	LOC101497886	Name=LOC101497886 {ECO:0000313|RefSeq:XP_004486706.1};	A0A1S2XBA1_CICAR	A0A1S2XBA1	pleiotropic drug resistance protein 1-like	SubName: Full=pleiotropic drug resistance protein 1-like {ECO:0000313|RefSeq:XP_004486706.1};	cam:101497886	IPR003593;IPR013525;IPR029481;IPR003439;IPR034001;IPR034003;IPR027417;IPR013581	XP_004486706.1			PF01061;PF00005;PF14510;PF08370	PS50893
	TRINITY_DN6669_c0_g1_i5	tr|I1GUT0|I1GUT0_BRADI	Brachypodium distachyon (Purple false brome) (Trachynia distachya)	LOC100844347 BRADI_1g26010, BRADI_1g28750	Name=LOC100844347 {ECO:0000313|EnsemblPlants:BRADI1G28750.1}; ORFNames=BRADI_1g26010 {ECO:0000313|EMBL:KQK15959.1}, BRADI_1g28750 {ECO:0000313|EMBL:KQK16438.1};	I1GUT0_BRADI	I1GUT0	Uncharacterized protein	SubName: Full=Uncharacterized protein {ECO:0000313|EMBL:KQK15959.1, ECO:0000313|EnsemblPlants:BRADI1G28750.1};	bdi:100843847;bdi:100844347	IPR000552;IPR011332	XP_003563008.1;XP_003563176.1	KOG3464;COG1631	EOG09360UDO	PF00935	PS01172	PTHR10369
	TRINITY_DN6669_c0_g1_i14	tr|I1GUT0|I1GUT0_BRADI	Brachypodium distachyon (Purple false brome) (Trachynia distachya)	LOC100844347 BRADI_1g26010, BRADI_1g28750	Name=LOC100844347 {ECO:0000313|EnsemblPlants:BRADI1G28750.1}; ORFNames=BRADI_1g26010 {ECO:0000313|EMBL:KQK15959.1}, BRADI_1g28750 {ECO:0000313|EMBL:KQK16438.1};	I1GUT0_BRADI	I1GUT0	Uncharacterized protein	SubName: Full=Uncharacterized protein {ECO:0000313|EMBL:KQK15959.1, ECO:0000313|EnsemblPlants:BRADI1G28750.1};	bdi:100843847;bdi:100844347	IPR000552;IPR011332	XP_003563008.1;XP_003563176.1	KOG3464;COG1631	EOG09360UDO	PF00935	PS01172	PTHR10369
	TRINITY_DN6669_c0_g1_i13	tr|I1GUT0|I1GUT0_BRADI	Brachypodium distachyon (Purple false brome) (Trachynia distachya)	LOC100844347 BRADI_1g26010, BRADI_1g28750	Name=LOC100844347 {ECO:0000313|EnsemblPlants:BRADI1G28750.1}; ORFNames=BRADI_1g26010 {ECO:0000313|EMBL:KQK15959.1}, BRADI_1g28750 {ECO:0000313|EMBL:KQK16438.1};	I1GUT0_BRADI	I1GUT0	Uncharacterized protein	SubName: Full=Uncharacterized protein {ECO:0000313|EMBL:KQK15959.1, ECO:0000313|EnsemblPlants:BRADI1G28750.1};	bdi:100843847;bdi:100844347	IPR000552;IPR011332	XP_003563008.1;XP_003563176.1	KOG3464;COG1631	EOG09360UDO	PF00935	PS01172	PTHR10369
	TRINITY_DN6669_c0_g1_i11	tr|I1GUT0|I1GUT0_BRADI	Brachypodium distachyon (Purple false brome) (Trachynia distachya)	LOC100844347 BRADI_1g26010, BRADI_1g28750	Name=LOC100844347 {ECO:0000313|EnsemblPlants:BRADI1G28750.1}; ORFNames=BRADI_1g26010 {ECO:0000313|EMBL:KQK15959.1}, BRADI_1g28750 {ECO:0000313|EMBL:KQK16438.1};	I1GUT0_BRADI	I1GUT0	Uncharacterized protein	SubName: Full=Uncharacterized protein {ECO:0000313|EMBL:KQK15959.1, ECO:0000313|EnsemblPlants:BRADI1G28750.1};	bdi:100843847;bdi:100844347	IPR000552;IPR011332	XP_003563008.1;XP_003563176.1	KOG3464;COG1631	EOG09360UDO	PF00935	PS01172	PTHR10369
	TRINITY_DN6669_c0_g1_i9	tr|I1GUT0|I1GUT0_BRADI	Brachypodium distachyon (Purple false brome) (Trachynia distachya)	LOC100844347 BRADI_1g26010, BRADI_1g28750	Name=LOC100844347 {ECO:0000313|EnsemblPlants:BRADI1G28750.1}; ORFNames=BRADI_1g26010 {ECO:0000313|EMBL:KQK15959.1}, BRADI_1g28750 {ECO:0000313|EMBL:KQK16438.1};	I1GUT0_BRADI	I1GUT0	Uncharacterized protein	SubName: Full=Uncharacterized protein {ECO:0000313|EMBL:KQK15959.1, ECO:0000313|EnsemblPlants:BRADI1G28750.1};	bdi:100843847;bdi:100844347	IPR000552;IPR011332	XP_003563008.1;XP_003563176.1	KOG3464;COG1631	EOG09360UDO	PF00935	PS01172	PTHR10369
	TRINITY_DN6669_c0_g1_i8	tr|I1GUT0|I1GUT0_BRADI	Brachypodium distachyon (Purple false brome) (Trachynia distachya)	LOC100844347 BRADI_1g26010, BRADI_1g28750	Name=LOC100844347 {ECO:0000313|EnsemblPlants:BRADI1G28750.1}; ORFNames=BRADI_1g26010 {ECO:0000313|EMBL:KQK15959.1}, BRADI_1g28750 {ECO:0000313|EMBL:KQK16438.1};	I1GUT0_BRADI	I1GUT0	Uncharacterized protein	SubName: Full=Uncharacterized protein {ECO:0000313|EMBL:KQK15959.1, ECO:0000313|EnsemblPlants:BRADI1G28750.1};	bdi:100843847;bdi:100844347	IPR000552;IPR011332	XP_003563008.1;XP_003563176.1	KOG3464;COG1631	EOG09360UDO	PF00935	PS01172	PTHR10369
	TRINITY_DN17420_c1_g1_i1	tr|I1H1V2|I1H1V2_BRADI	Brachypodium distachyon (Purple false brome) (Trachynia distachya)	LOC100838410 BRADI_1g51650	Name=LOC100838410 {ECO:0000313|EnsemblPlants:BRADI1G51650.1}; ORFNames=BRADI_1g51650 {ECO:0000313|EMBL:KQK19982.1};	I1H1V2_BRADI	I1H1V2	Uncharacterized protein	SubName: Full=Uncharacterized protein {ECO:0000313|EMBL:KQK19982.1, ECO:0000313|EnsemblPlants:BRADI1G51650.1};	bdi:100838410	IPR001848;IPR027486;IPR036838;IPR005729	XP_003557244.1	KOG0900;COG0051	EOG09360SM2	PF00338		PTHR11700	TIGR01046
	TRINITY_DN17498_c0_g1_i2	tr|B8BUA7|B8BUA7_THAPS	Thalassiosira pseudonana (Marine diatom) (Cyclotella nana)	RL14 THAPSDRAFT_39499	Name=RL14 {ECO:0000313|EMBL:EED94727.1}; ORFNames=THAPSDRAFT_39499 {ECO:0000313|EMBL:EED94727.1};	B8BUA7_THAPS	B8BUA7	RL14, ribosomal protein 14 60S large ribosomal subunit	SubName: Full=RL14, ribosomal protein 14 60S large ribosomal subunit {ECO:0000313|EMBL:EED94727.1};	tps:THAPSDRAFT_39499	IPR014722;IPR002784;IPR008991	XP_002287284.1	KOG3421;COG2163		PF01929
	TRINITY_DN17413_c0_g1_i3	tr|K3XVE4|K3XVE4_SETIT	Setaria italica (Foxtail millet) (Panicum italicum)	LOC101777022 SETIT_005901mg	Name=LOC101777022 {ECO:0000313|EnsemblPlants:Si005901m}; ORFNames=SETIT_005901mg {ECO:0000313|EMBL:KQL08958.1};	K3XVE4_SETIT	K3XVE4	Uncharacterized protein	SubName: Full=Uncharacterized protein {ECO:0000313|EMBL:KQL08958.1, ECO:0000313|EnsemblPlants:Si005901m};	sita:101777022	IPR003593;IPR003959;IPR003960;IPR027417	XP_004964309.1	KOG0733;COG0464	EOG093602RA	PF00004	PS00674
	TRINITY_DN17413_c0_g1_i1	tr|K3XVE4|K3XVE4_SETIT	Setaria italica (Foxtail millet) (Panicum italicum)	LOC101777022 SETIT_005901mg	Name=LOC101777022 {ECO:0000313|EnsemblPlants:Si005901m}; ORFNames=SETIT_005901mg {ECO:0000313|EMBL:KQL08958.1};	K3XVE4_SETIT	K3XVE4	Uncharacterized protein	SubName: Full=Uncharacterized protein {ECO:0000313|EMBL:KQL08958.1, ECO:0000313|EnsemblPlants:Si005901m};	sita:101777022	IPR003593;IPR003959;IPR003960;IPR027417	XP_004964309.1	KOG0733;COG0464	EOG093602RA	PF00004	PS00674
	TRINITY_DN17892_c0_g1_i10	tr|B4F9P5|B4F9P5_MAIZE	Zea mays (Maize)	ZEAMMB73_Zm00001d022274	ORFNames=ZEAMMB73_Zm00001d022274 {ECO:0000313|EMBL:ONM60016.1};	B4F9P5_MAIZE	B4F9P5	Pyruvate orthophosphate dikinase4	SubName: Full=Pyruvate orthophosphate dikinase4 {ECO:0000313|EMBL:ONM60016.1};	zma:542603	IPR036784;IPR018955;IPR003594;IPR036890;IPR005467;IPR004358	NP_001105608.1	KOG0787;COG0642	EOG09360CQD	PF10436;PF02518	PS50109
	TRINITY_DN17827_c0_g1_i5	tr|I1I2S0|I1I2S0_BRADI	Brachypodium distachyon (Purple false brome) (Trachynia distachya)	LOC100828713 BRADI_3g20460	Name=LOC100828713 {ECO:0000313|EnsemblPlants:BRADI3G20460.1}; ORFNames=BRADI_3g20460 {ECO:0000313|EMBL:KQJ96023.1};	I1I2S0_BRADI	I1I2S0	Polyadenylate-binding protein; PABP	RecName: Full=Polyadenylate-binding protein {ECO:0000256|RuleBase:RU362004}; Short=PABP {ECO:0000256|RuleBase:RU362004};	bdi:100828713	IPR036053;IPR006515;IPR002004;IPR035979;IPR000504;IPR003954	XP_003573691.1	KOG0123;ENOG410XR5X	EOG093606N5	PF00658;PF00076	PS51309;PS50102		TIGR01628
	TRINITY_DN24427_c0_g2_i1	tr|I1IXE5|I1IXE5_BRADI	Brachypodium distachyon (Purple false brome) (Trachynia distachya)	LOC100829551 BRADI_5g09030	Name=LOC100829551 {ECO:0000313|EnsemblPlants:BRADI5G09030.1}; ORFNames=BRADI_5g09030 {ECO:0000313|EMBL:KQJ82451.1};	I1IXE5_BRADI	I1IXE5	Arogenate dehydratase	RecName: Full=Arogenate dehydratase {ECO:0000256|RuleBase:RU363004}; EC=4.2.1.91 {ECO:0000256|RuleBase:RU363004};	bdi:100829551	IPR002912;IPR001086;IPR018528	XP_003579674.1	KOG2797;COG0077	EOG09360EOM	PF00800	PS51671;PS00857;PS00858;PS51171
	TRINITY_DN24491_c0_g5_i1	tr|I1IJD3|I1IJD3_BRADI	Brachypodium distachyon (Purple false brome) (Trachynia distachya)	LOC100822664 BRADI_4g10090	Name=LOC100822664 {ECO:0000313|EnsemblPlants:BRADI4G10090.1}; ORFNames=BRADI_4g10090 {ECO:0000313|EMBL:KQJ87273.1};	I1IJD3_BRADI	I1IJD3	Uncharacterized protein	SubName: Full=Uncharacterized protein {ECO:0000313|EMBL:KQJ87273.1, ECO:0000313|EnsemblPlants:BRADI4G10090.1};	bdi:100822664	IPR002110;IPR020683;IPR036770;IPR013026;IPR011990;IPR019734	XP_014757461.1	KOG0504;KOG0548;COG0666	EOG09360ABH	PF12796	PS50297;PS50088;PS50005;PS50293
	TRINITY_DN24441_c2_g1_i2	sp|P0CG71|UBIQ1_CAEEL	Caenorhabditis elegans	ubq-1 ubia F25B5.4	Name=ubq-1; Synonyms=ubia; ORFNames=F25B5.4;	UBIQ1_CAEEL	P0CG71	Polyubiquitin-A; Ubiquitin; Ubiquitin-related	RecName: Full=Polyubiquitin-A; Contains: RecName: Full=Ubiquitin; Contains: RecName: Full=Ubiquitin-related; Flags: Precursor;	cel:CELE_F25B5.4	IPR019956;IPR029071;IPR019954;IPR000626	NP_741157.1	KOG0001;COG5272	EOG091G178I	PF00240	PS00299;PS50053
	TRINITY_DN24441_c2_g1_i3	sp|P0CG71|UBIQ1_CAEEL	Caenorhabditis elegans	ubq-1 ubia F25B5.4	Name=ubq-1; Synonyms=ubia; ORFNames=F25B5.4;	UBIQ1_CAEEL	P0CG71	Polyubiquitin-A; Ubiquitin; Ubiquitin-related	RecName: Full=Polyubiquitin-A; Contains: RecName: Full=Ubiquitin; Contains: RecName: Full=Ubiquitin-related; Flags: Precursor;	cel:CELE_F25B5.4	IPR019956;IPR029071;IPR019954;IPR000626	NP_741157.1	KOG0001;COG5272	EOG091G178I	PF00240	PS00299;PS50053
	TRINITY_DN24456_c0_g2_i7	tr|A0A1B1MIF6|A0A1B1MIF6_STRLN	Streptomyces lincolnensis	SLINC_2054, SLINC_3423, SLINC_6157	ORFNames=SLINC_2054 {ECO:0000313|EMBL:ANS64278.1}, SLINC_3423 {ECO:0000313|EMBL:ANS65647.1}, SLINC_6157 {ECO:0000313|EMBL:ANS68381.1};	A0A1B1MIF6_STRLN	A0A1B1MIF6	Uncharacterized protein	SubName: Full=Uncharacterized protein {ECO:0000313|EMBL:ANS68381.1};	sls:SLINC_2054;sls:SLINC_3423;sls:SLINC_6157
	TRINITY_DN24456_c0_g2_i3	tr|A0A1B1MIF6|A0A1B1MIF6_STRLN	Streptomyces lincolnensis	SLINC_2054, SLINC_3423, SLINC_6157	ORFNames=SLINC_2054 {ECO:0000313|EMBL:ANS64278.1}, SLINC_3423 {ECO:0000313|EMBL:ANS65647.1}, SLINC_6157 {ECO:0000313|EMBL:ANS68381.1};	A0A1B1MIF6_STRLN	A0A1B1MIF6	Uncharacterized protein	SubName: Full=Uncharacterized protein {ECO:0000313|EMBL:ANS68381.1};	sls:SLINC_2054;sls:SLINC_3423;sls:SLINC_6157
	TRINITY_DN24456_c0_g2_i10	tr|A0A1B1MIF6|A0A1B1MIF6_STRLN	Streptomyces lincolnensis	SLINC_2054, SLINC_3423, SLINC_6157	ORFNames=SLINC_2054 {ECO:0000313|EMBL:ANS64278.1}, SLINC_3423 {ECO:0000313|EMBL:ANS65647.1}, SLINC_6157 {ECO:0000313|EMBL:ANS68381.1};	A0A1B1MIF6_STRLN	A0A1B1MIF6	Uncharacterized protein	SubName: Full=Uncharacterized protein {ECO:0000313|EMBL:ANS68381.1};	sls:SLINC_2054;sls:SLINC_3423;sls:SLINC_6157
	TRINITY_DN24456_c1_g1_i1	tr|W5YCH9|W5YCH9_KOMXY	Komagataeibacter xylinus E25	H845_2467, H845_2781, H845_49, H845_693, H845_927	ORFNames=H845_2467 {ECO:0000313|EMBL:AHI26394.1}, H845_2781 {ECO:0000313|EMBL:AHI26695.1}, H845_49 {ECO:0000313|EMBL:AHI24017.1}, H845_693 {ECO:0000313|EMBL:AHI24648.1}, H845_927 {ECO:0000313|EMBL:AHI24875.1};	W5YCH9_KOMXY	W5YCH9	Uncharacterized protein	SubName: Full=Uncharacterized protein {ECO:0000313|EMBL:AHI26695.1};	gxl:H845_2467;gxl:H845_2781;gxl:H845_49;gxl:H845_693;gxl:H845_927
	TRINITY_DN24478_c0_g1_i1	tr|I1GYL8|I1GYL8_BRADI	Brachypodium distachyon (Purple false brome) (Trachynia distachya)	LOC100830497 BRADI_1g42310	Name=LOC100830497 {ECO:0000313|EnsemblPlants:BRADI1G42310.1}; ORFNames=BRADI_1g42310 {ECO:0000313|EMBL:KQK18403.1};	I1GYL8_BRADI	I1GYL8	Phospholipid-transporting ATPase	RecName: Full=Phospholipid-transporting ATPase {ECO:0000256|RuleBase:RU362033}; EC=3.6.3.1 {ECO:0000256|RuleBase:RU362033};	bdi:100830497	IPR023299;IPR018303;IPR023298;IPR008250;IPR036412;IPR023214;IPR006539;IPR032631;IPR001757;IPR032630	XP_010227699.1	ENOG410ITKD;ENOG410XPYK	EOG0936012H	PF16212;PF16209	PS00154	PTHR24092	TIGR01652;TIGR01494
	TRINITY_DN24478_c0_g1_i4	tr|I1GYL8|I1GYL8_BRADI	Brachypodium distachyon (Purple false brome) (Trachynia distachya)	LOC100830497 BRADI_1g42310	Name=LOC100830497 {ECO:0000313|EnsemblPlants:BRADI1G42310.1}; ORFNames=BRADI_1g42310 {ECO:0000313|EMBL:KQK18403.1};	I1GYL8_BRADI	I1GYL8	Phospholipid-transporting ATPase	RecName: Full=Phospholipid-transporting ATPase {ECO:0000256|RuleBase:RU362033}; EC=3.6.3.1 {ECO:0000256|RuleBase:RU362033};	bdi:100830497	IPR023299;IPR018303;IPR023298;IPR008250;IPR036412;IPR023214;IPR006539;IPR032631;IPR001757;IPR032630	XP_010227699.1	ENOG410ITKD;ENOG410XPYK	EOG0936012H	PF16212;PF16209	PS00154	PTHR24092	TIGR01652;TIGR01494
	TRINITY_DN24478_c0_g1_i8	tr|I1GYL8|I1GYL8_BRADI	Brachypodium distachyon (Purple false brome) (Trachynia distachya)	LOC100830497 BRADI_1g42310	Name=LOC100830497 {ECO:0000313|EnsemblPlants:BRADI1G42310.1}; ORFNames=BRADI_1g42310 {ECO:0000313|EMBL:KQK18403.1};	I1GYL8_BRADI	I1GYL8	Phospholipid-transporting ATPase	RecName: Full=Phospholipid-transporting ATPase {ECO:0000256|RuleBase:RU362033}; EC=3.6.3.1 {ECO:0000256|RuleBase:RU362033};	bdi:100830497	IPR023299;IPR018303;IPR023298;IPR008250;IPR036412;IPR023214;IPR006539;IPR032631;IPR001757;IPR032630	XP_010227699.1	ENOG410ITKD;ENOG410XPYK	EOG0936012H	PF16212;PF16209	PS00154	PTHR24092	TIGR01652;TIGR01494
	TRINITY_DN24478_c0_g1_i9	tr|I1GYL8|I1GYL8_BRADI	Brachypodium distachyon (Purple false brome) (Trachynia distachya)	LOC100830497 BRADI_1g42310	Name=LOC100830497 {ECO:0000313|EnsemblPlants:BRADI1G42310.1}; ORFNames=BRADI_1g42310 {ECO:0000313|EMBL:KQK18403.1};	I1GYL8_BRADI	I1GYL8	Phospholipid-transporting ATPase	RecName: Full=Phospholipid-transporting ATPase {ECO:0000256|RuleBase:RU362033}; EC=3.6.3.1 {ECO:0000256|RuleBase:RU362033};	bdi:100830497	IPR023299;IPR018303;IPR023298;IPR008250;IPR036412;IPR023214;IPR006539;IPR032631;IPR001757;IPR032630	XP_010227699.1	ENOG410ITKD;ENOG410XPYK	EOG0936012H	PF16212;PF16209	PS00154	PTHR24092	TIGR01652;TIGR01494
	TRINITY_DN24478_c0_g1_i7	tr|I1GYL8|I1GYL8_BRADI	Brachypodium distachyon (Purple false brome) (Trachynia distachya)	LOC100830497 BRADI_1g42310	Name=LOC100830497 {ECO:0000313|EnsemblPlants:BRADI1G42310.1}; ORFNames=BRADI_1g42310 {ECO:0000313|EMBL:KQK18403.1};	I1GYL8_BRADI	I1GYL8	Phospholipid-transporting ATPase	RecName: Full=Phospholipid-transporting ATPase {ECO:0000256|RuleBase:RU362033}; EC=3.6.3.1 {ECO:0000256|RuleBase:RU362033};	bdi:100830497	IPR023299;IPR018303;IPR023298;IPR008250;IPR036412;IPR023214;IPR006539;IPR032631;IPR001757;IPR032630	XP_010227699.1	ENOG410ITKD;ENOG410XPYK	EOG0936012H	PF16212;PF16209	PS00154	PTHR24092	TIGR01652;TIGR01494
	TRINITY_DN24478_c0_g1_i6	tr|I1GYL8|I1GYL8_BRADI	Brachypodium distachyon (Purple false brome) (Trachynia distachya)	LOC100830497 BRADI_1g42310	Name=LOC100830497 {ECO:0000313|EnsemblPlants:BRADI1G42310.1}; ORFNames=BRADI_1g42310 {ECO:0000313|EMBL:KQK18403.1};	I1GYL8_BRADI	I1GYL8	Phospholipid-transporting ATPase	RecName: Full=Phospholipid-transporting ATPase {ECO:0000256|RuleBase:RU362033}; EC=3.6.3.1 {ECO:0000256|RuleBase:RU362033};	bdi:100830497	IPR023299;IPR018303;IPR023298;IPR008250;IPR036412;IPR023214;IPR006539;IPR032631;IPR001757;IPR032630	XP_010227699.1	ENOG410ITKD;ENOG410XPYK	EOG0936012H	PF16212;PF16209	PS00154	PTHR24092	TIGR01652;TIGR01494
	TRINITY_DN24464_c0_g1_i6	tr|Q75IT5|Q75IT5_ORYSJ	Oryza sativa subsp. japonica (Rice)	OSJNBb0111K12.6 Os05g0365200 OSNPB_050365200, P0683B02.11	Name=OSJNBb0111K12.6 {ECO:0000313|EMBL:AAS79734.1}; OrderedLocusNames=Os05g0365200 {ECO:0000313|EMBL:BAF17238.1}; ORFNames=OSNPB_050365200 {ECO:0000313|EMBL:BAS93634.1}, P0683B02.11 {ECO:0000313|EMBL:AAV32239.1};	Q75IT5_ORYSJ	Q75IT5	Os05g0365200 protein; cDNA clone:J023033B18, full insert sequence	SubName: Full=Os05g0365200 protein {ECO:0000313|EMBL:BAF17238.1}; SubName: Full=cDNA clone:J023033B18, full insert sequence {ECO:0000313|EMBL:BAH00224.1};	osa:4338553		XP_015637932.1;XP_015637933.1	ENOG410IVIS;ENOG411298C	EOG09360FFP
	TRINITY_DN24464_c0_g1_i1	tr|Q75IT5|Q75IT5_ORYSJ	Oryza sativa subsp. japonica (Rice)	OSJNBb0111K12.6 Os05g0365200 OSNPB_050365200, P0683B02.11	Name=OSJNBb0111K12.6 {ECO:0000313|EMBL:AAS79734.1}; OrderedLocusNames=Os05g0365200 {ECO:0000313|EMBL:BAF17238.1}; ORFNames=OSNPB_050365200 {ECO:0000313|EMBL:BAS93634.1}, P0683B02.11 {ECO:0000313|EMBL:AAV32239.1};	Q75IT5_ORYSJ	Q75IT5	Os05g0365200 protein; cDNA clone:J023033B18, full insert sequence	SubName: Full=Os05g0365200 protein {ECO:0000313|EMBL:BAF17238.1}; SubName: Full=cDNA clone:J023033B18, full insert sequence {ECO:0000313|EMBL:BAH00224.1};	osa:4338553		XP_015637932.1;XP_015637933.1	ENOG410IVIS;ENOG411298C	EOG09360FFP
	TRINITY_DN29777_c0_g3_i1	tr|I1GKR4|I1GKR4_BRADI	Brachypodium distachyon (Purple false brome) (Trachynia distachya)	LOC100833957 BRADI_1g01320	Name=LOC100833957 {ECO:0000313|EnsemblPlants:BRADI1G01320.1}; ORFNames=BRADI_1g01320 {ECO:0000313|EMBL:KQK12057.1};	I1GKR4_BRADI	I1GKR4	Uncharacterized protein	SubName: Full=Uncharacterized protein {ECO:0000313|EMBL:KQK12057.1, ECO:0000313|EnsemblPlants:BRADI1G01320.1};	bdi:100833957		XP_003561083.1	ENOG410J0Q8;ENOG410YQQF	EOG09360R2Z
	TRINITY_DN29793_c0_g1_i1	tr|A0A087SJ32|A0A087SJ32_AUXPR	Auxenochlorella protothecoides (Green microalga) (Chlorella protothecoides)	F751_2578	ORFNames=F751_2578 {ECO:0000313|EMBL:KFM25736.1};	A0A087SJ32_AUXPR	A0A087SJ32	Acyl-CoA-binding protein	SubName: Full=Acyl-CoA-binding protein {ECO:0000313|EMBL:KFM25736.1};	apro:F751_2578	IPR022408;IPR000582;IPR035984;IPR014352	XP_011398632.1			PF00887	PS00880;PS51228
	TRINITY_DN34646_c0_g1_i8	tr|Q0JD88|Q0JD88_ORYSJ	Oryza sativa subsp. japonica (Rice)	Os04g0421700 Os04g0421700 OsJ_14798, OSNPB_040421700	Name=Os04g0421700 {ECO:0000313|EMBL:BAS89195.1}; OrderedLocusNames=Os04g0421700 {ECO:0000313|EMBL:BAF14699.1}; ORFNames=OsJ_14798 {ECO:0000313|EMBL:EEE60994.1}, OSNPB_040421700 {ECO:0000313|EMBL:BAS89195.1};	Q0JD88_ORYSJ	Q0JD88	Os04g0421700 protein	SubName: Full=Os04g0421700 protein {ECO:0000313|EMBL:BAF14699.1};	osa:4335832	IPR004330;IPR031052;IPR018289;IPR006564;IPR007527	XP_015636420.1	ENOG410J8T9;ENOG41119Q1	EOG093607HQ	PF03101;PF10551;PF04434	PS50966	PTHR31669
	TRINITY_DN34603_c0_g1_i1	tr|I1HGC1|I1HGC1_BRADI	Brachypodium distachyon (Purple false brome) (Trachynia distachya)	LOC100841831 BRADI_2g16290	Name=LOC100841831 {ECO:0000313|EnsemblPlants:BRADI2G16290.1}; ORFNames=BRADI_2g16290 {ECO:0000313|EMBL:KQK04838.1};	I1HGC1_BRADI	I1HGC1	Chlorophyll a-b binding protein, chloroplastic	RecName: Full=Chlorophyll a-b binding protein, chloroplastic {ECO:0000256|RuleBase:RU363080};	bdi:100841831	IPR001344;IPR022796;IPR023329	XP_010231015.1	ENOG410IU0X;ENOG410ZHBU	EOG09360I0J	PF00504		PTHR21649
	TRINITY_DN11612_c0_g1_i2	tr|A0A1U8BMW6|A0A1U8BMW6_NELNU	Nelumbo nucifera (Sacred lotus)	LOC104612828	Name=LOC104612828 {ECO:0000313|RefSeq:XP_010278719.1};	A0A1U8BMW6_NELNU	A0A1U8BMW6	uncharacterized protein LOC104612828	SubName: Full=uncharacterized protein LOC104612828 {ECO:0000313|RefSeq:XP_010278719.1};	nnu:104612828	IPR001584;IPR005162;IPR012337;IPR036397	XP_010278719.1			PF03732;PF00665	PS50994
	TRINITY_DN11690_c0_g1_i1	sp|Q10FF9|DUT_ORYSJ	Oryza sativa subsp. japonica (Rice)	DUT Os03g0669100, LOC_Os03g46640 OSJNBa0039O18.10	Name=DUT; OrderedLocusNames=Os03g0669100, LOC_Os03g46640; ORFNames=OSJNBa0039O18.10;	DUT_ORYSJ	Q10FF9	Deoxyuridine 5'-triphosphate nucleotidohydrolase; dUTPase; dUTP pyrophosphatase	RecName: Full=Deoxyuridine 5'-triphosphate nucleotidohydrolase; Short=dUTPase; EC=3.6.1.23; AltName: Full=dUTP pyrophosphatase;	osa:4333679	IPR029054;IPR036157;IPR008181;IPR033704	XP_015628906.1	KOG3370;COG0756		PF00692			TIGR00576
	TRINITY_DN11690_c0_g1_i2	sp|Q10FF9|DUT_ORYSJ	Oryza sativa subsp. japonica (Rice)	DUT Os03g0669100, LOC_Os03g46640 OSJNBa0039O18.10	Name=DUT; OrderedLocusNames=Os03g0669100, LOC_Os03g46640; ORFNames=OSJNBa0039O18.10;	DUT_ORYSJ	Q10FF9	Deoxyuridine 5'-triphosphate nucleotidohydrolase; dUTPase; dUTP pyrophosphatase	RecName: Full=Deoxyuridine 5'-triphosphate nucleotidohydrolase; Short=dUTPase; EC=3.6.1.23; AltName: Full=dUTP pyrophosphatase;	osa:4333679	IPR029054;IPR036157;IPR008181;IPR033704	XP_015628906.1	KOG3370;COG0756		PF00692			TIGR00576
	TRINITY_DN39796_c0_g1_i2	tr|A4S0W7|A4S0W7_OSTLU	Ostreococcus lucimarinus (strain CCE9901)	HTR3503 OSTLU_32891	Name=HTR3503 {ECO:0000313|EMBL:ABO97552.1}; ORFNames=OSTLU_32891 {ECO:0000313|EMBL:ABO97552.1};	A4S0W7_OSTLU	A4S0W7	Histone H3	RecName: Full=Histone H3 {ECO:0000256|RuleBase:RU004471};	olu:OSTLU_32891	IPR009072;IPR007125;IPR000164	XP_001419259.1	KOG1745;COG2036		PF00125	PS00322;PS00959	PTHR11426
	TRINITY_DN39796_c0_g1_i1	tr|A0A1U8JQH7|A0A1U8JQH7_GOSHI	Gossypium hirsutum (Upland cotton) (Gossypium mexicanum)	LOC107907772	Name=LOC107907772 {ECO:0000313|RefSeq:XP_016690579.1};	A0A1U8JQH7_GOSHI	A0A1U8JQH7	histone H3-like centromeric protein CSE4	SubName: Full=histone H3-like centromeric protein CSE4 {ECO:0000313|RefSeq:XP_016690579.1};	ghi:107907772	IPR009072;IPR007125;IPR000164	XP_016690579.1			PF00125	PS00322;PS00959	PTHR11426
	TRINITY_DN39706_c0_g1_i2	tr|I1LNX0|I1LNX0_SOYBN	Glycine max (Soybean) (Glycine hispida)	LOC100802243 GLYMA_12G008700	Name=LOC100802243 {ECO:0000313|EnsemblPlants:GLYMA12G01130.1}; ORFNames=GLYMA_12G008700 {ECO:0000313|EMBL:KRH23882.1};	I1LNX0_SOYBN	I1LNX0	Uncharacterized protein	SubName: Full=Uncharacterized protein {ECO:0000313|EMBL:KRH23882.1, ECO:0000313|EnsemblPlants:GLYMA12G01130.1};	gmx:100802243	IPR026992;IPR027443;IPR005123	XP_003539824.1	ENOG410IIVE;ENOG410XTFZ	EOG09370JNO	PF14226	PS51471
	TRINITY_DN39706_c0_g1_i3	tr|I1LNX0|I1LNX0_SOYBN	Glycine max (Soybean) (Glycine hispida)	LOC100802243 GLYMA_12G008700	Name=LOC100802243 {ECO:0000313|EnsemblPlants:GLYMA12G01130.1}; ORFNames=GLYMA_12G008700 {ECO:0000313|EMBL:KRH23882.1};	I1LNX0_SOYBN	I1LNX0	Uncharacterized protein	SubName: Full=Uncharacterized protein {ECO:0000313|EMBL:KRH23882.1, ECO:0000313|EnsemblPlants:GLYMA12G01130.1};	gmx:100802243	IPR026992;IPR027443;IPR005123	XP_003539824.1	ENOG410IIVE;ENOG410XTFZ	EOG09370JNO	PF14226	PS51471
	TRINITY_DN39775_c0_g2_i1	tr|I1GZK0|I1GZK0_BRADI	Brachypodium distachyon (Purple false brome) (Trachynia distachya)	LOC100835001 BRADI_1g45210	Name=LOC100835001 {ECO:0000313|EnsemblPlants:BRADI1G45210.1}; ORFNames=BRADI_1g45210 {ECO:0000313|EMBL:KQK18875.1};	I1GZK0_BRADI	I1GZK0	Hexosyltransferase	RecName: Full=Hexosyltransferase {ECO:0000256|RuleBase:RU362027}; EC=2.4.1.- {ECO:0000256|RuleBase:RU362027};	bdi:100835001	IPR029993;IPR002495;IPR029044	XP_003564052.1	ENOG410J9R4;ENOG41114H2	EOG09360ERE	PF01501		PTHR32116
	TRINITY_DN39775_c1_g1_i1	tr|I1GZK0|I1GZK0_BRADI	Brachypodium distachyon (Purple false brome) (Trachynia distachya)	LOC100835001 BRADI_1g45210	Name=LOC100835001 {ECO:0000313|EnsemblPlants:BRADI1G45210.1}; ORFNames=BRADI_1g45210 {ECO:0000313|EMBL:KQK18875.1};	I1GZK0_BRADI	I1GZK0	Hexosyltransferase	RecName: Full=Hexosyltransferase {ECO:0000256|RuleBase:RU362027}; EC=2.4.1.- {ECO:0000256|RuleBase:RU362027};	bdi:100835001	IPR029993;IPR002495;IPR029044	XP_003564052.1	ENOG410J9R4;ENOG41114H2	EOG09360ERE	PF01501		PTHR32116
	TRINITY_DN39775_c1_g1_i2	tr|I1GZK0|I1GZK0_BRADI	Brachypodium distachyon (Purple false brome) (Trachynia distachya)	LOC100835001 BRADI_1g45210	Name=LOC100835001 {ECO:0000313|EnsemblPlants:BRADI1G45210.1}; ORFNames=BRADI_1g45210 {ECO:0000313|EMBL:KQK18875.1};	I1GZK0_BRADI	I1GZK0	Hexosyltransferase	RecName: Full=Hexosyltransferase {ECO:0000256|RuleBase:RU362027}; EC=2.4.1.- {ECO:0000256|RuleBase:RU362027};	bdi:100835001	IPR029993;IPR002495;IPR029044	XP_003564052.1	ENOG410J9R4;ENOG41114H2	EOG09360ERE	PF01501		PTHR32116
	TRINITY_DN39764_c0_g2_i2	sp|P42862|G6PIA_ORYSJ	Oryza sativa subsp. japonica (Rice)	Os03g0776000, LOC_Os03g56460 OsJ_12779, OSJNBa0070N04.5	OrderedLocusNames=Os03g0776000 {ECO:0000312|EMBL:BAF13348.1}, LOC_Os03g56460 {ECO:0000312|EMBL:ABF99132.1}; ORFNames=OsJ_12779 {ECO:0000312|EMBL:EEE60024.1}, OSJNBa0070N04.5;	G6PIA_ORYSJ	P42862	Glucose-6-phosphate isomerase, cytosolic A; GPI-A; Phosphoglucose isomerase A; PGI-A; Phosphohexose isomerase A; PHI-A	RecName: Full=Glucose-6-phosphate isomerase, cytosolic A; Short=GPI-A; EC=5.3.1.9; AltName: Full=Phosphoglucose isomerase A; Short=PGI-A; AltName: Full=Phosphohexose isomerase A; Short=PHI-A;	osa:4334290	IPR001672;IPR023096;IPR018189;IPR035476;IPR035482	XP_015632584.1;XP_015632585.1	KOG2446;COG0166	EOG093606CP	PF00342	PS00765;PS00174;PS51463	PTHR11469
	TRINITY_DN67336_c0_g1_i2	tr|G4ZMR6|G4ZMR6_PHYSP	Phytophthora sojae (strain P6497) (Soybean stem and root rot agent) (Phytophthora megasperma f. sp. glycines)	PHYSODRAFT_286426	ORFNames=PHYSODRAFT_286426 {ECO:0000313|EMBL:EGZ16036.1};	G4ZMR6_PHYSP	G4ZMR6	Uncharacterized protein	SubName: Full=Uncharacterized protein {ECO:0000313|EMBL:EGZ16036.1};	psoj:PHYSODRAFT_286426	IPR037447;IPR005326	XP_009529785.1			PF03501		PTHR12146
	TRINITY_DN67376_c0_g1_i1	tr|B4H3F6|B4H3F6_DROPE	Drosophila persimilis (Fruit fly)	Dper\GL12432 Dper_GL12432, GL12432	Name=Dper\GL12432 {ECO:0000313|EMBL:EDW30896.1}; ORFNames=Dper_GL12432 {ECO:0000313|EMBL:EDW30896.1}, GL12432 {ECO:0000313|FlyBase:FBgn0150038};	B4H3F6_DROPE	B4H3F6	GL12432	SubName: Full=GL12432 {ECO:0000313|EMBL:EDW30896.1};	dpe:Dper_GL12432	IPR012678;IPR001014;IPR005633;IPR013025	XP_002025385.1		EOG091G0UYL	PF00276;PF03939	PS00050
	TRINITY_DN67376_c1_g1_i2	tr|C6SZQ3|C6SZQ3_SOYBN	Glycine max (Soybean) (Glycine hispida)	LOC100500043 GLYMA_12G066700	Name=LOC100500043 {ECO:0000313|EnsemblPlants:GLYMA12G07160.1}; ORFNames=GLYMA_12G066700 {ECO:0000313|EMBL:KRH24855.1};	C6SZQ3_SOYBN	C6SZQ3	Uncharacterized protein	SubName: Full=Uncharacterized protein {ECO:0000313|EMBL:ACU14726.1, ECO:0000313|EnsemblPlants:GLYMA12G07160.1};	gmx:100500043	IPR019985;IPR012678;IPR001014;IPR005633;IPR013025	NP_001236040.1	KOG1751;COG0089	EOG0937112H	PF00276;PF03939	PS00050		TIGR03636
	TRINITY_DN67376_c1_g1_i1	tr|G7JTN9|G7JTN9_MEDTR	Medicago truncatula (Barrel medic) (Medicago tribuloides)	11415929 MTR_4g063060	Name=11415929 {ECO:0000313|EnsemblPlants:AES88808}; OrderedLocusNames=MTR_4g063060 {ECO:0000313|EMBL:AES88808.1};	G7JTN9_MEDTR	G7JTN9	60S ribosomal protein L23a-2	SubName: Full=60S ribosomal protein L23a-2 {ECO:0000313|EMBL:AES88808.1};	mtr:MTR_4g063060	IPR019985;IPR012678;IPR001014;IPR005633;IPR013025	XP_003606611.1		EOG09360UKG	PF00276;PF03939	PS00050		TIGR03636
	TRINITY_DN67376_c2_g1_i1	tr|L8GRL5|L8GRL5_ACACA	Acanthamoeba castellanii str. Neff	ACA1_164710	ORFNames=ACA1_164710 {ECO:0000313|EMBL:ELR15590.1};	L8GRL5_ACACA	L8GRL5	Ribosomal protein L23, putative	SubName: Full=Ribosomal protein L23, putative {ECO:0000313|EMBL:ELR15590.1};	acan:ACA1_164710	IPR019985;IPR012678;IPR001014;IPR005633;IPR013025	XP_004337603.1			PF00276;PF03939	PS00050		TIGR03636
	TRINITY_DN769_c0_g1_i8	tr|I1GMN5|I1GMN5_BRADI	Brachypodium distachyon (Purple false brome) (Trachynia distachya)	LOC100830051 BRADI_1g06800	Name=LOC100830051 {ECO:0000313|EnsemblPlants:BRADI1G06800.1}; ORFNames=BRADI_1g06800 {ECO:0000313|EMBL:KQK12908.1};	I1GMN5_BRADI	I1GMN5	Tubulin beta chain	RecName: Full=Tubulin beta chain {ECO:0000256|RuleBase:RU000352};	bdi:100830051	IPR013838;IPR002453;IPR008280;IPR000217;IPR018316;IPR037103;IPR036525;IPR017975;IPR003008	XP_010228968.1	KOG1375;COG5023	EOG093609MT	PF00091;PF03953	PS00227;PS00228	PTHR11588
	TRINITY_DN769_c0_g1_i12	tr|C0PA67|C0PA67_MAIZE	Zea mays (Maize)			C0PA67_MAIZE	C0PA67	Tubulin beta chain	RecName: Full=Tubulin beta chain {ECO:0000256|RuleBase:RU000352};	zma:100502086	IPR002453;IPR008280;IPR000217;IPR018316;IPR037103;IPR036525;IPR017975;IPR003008	NP_001168917.2	KOG1375;COG5023		PF00091;PF03953	PS00227	PTHR11588
	TRINITY_DN769_c0_g1_i13	tr|C0PA67|C0PA67_MAIZE	Zea mays (Maize)			C0PA67_MAIZE	C0PA67	Tubulin beta chain	RecName: Full=Tubulin beta chain {ECO:0000256|RuleBase:RU000352};	zma:100502086	IPR002453;IPR008280;IPR000217;IPR018316;IPR037103;IPR036525;IPR017975;IPR003008	NP_001168917.2	KOG1375;COG5023		PF00091;PF03953	PS00227	PTHR11588
	TRINITY_DN769_c0_g1_i1	tr|I1GMN5|I1GMN5_BRADI	Brachypodium distachyon (Purple false brome) (Trachynia distachya)	LOC100830051 BRADI_1g06800	Name=LOC100830051 {ECO:0000313|EnsemblPlants:BRADI1G06800.1}; ORFNames=BRADI_1g06800 {ECO:0000313|EMBL:KQK12908.1};	I1GMN5_BRADI	I1GMN5	Tubulin beta chain	RecName: Full=Tubulin beta chain {ECO:0000256|RuleBase:RU000352};	bdi:100830051	IPR013838;IPR002453;IPR008280;IPR000217;IPR018316;IPR037103;IPR036525;IPR017975;IPR003008	XP_010228968.1	KOG1375;COG5023	EOG093609MT	PF00091;PF03953	PS00227;PS00228	PTHR11588
	TRINITY_DN718_c0_g1_i1	tr|C4IZS6|C4IZS6_MAIZE	Zea mays (Maize)	100384731 ZEAMMB73_Zm00001d006886	Name=100384731 {ECO:0000313|EnsemblPlants:Zm00001d006886_P002}; ORFNames=ZEAMMB73_Zm00001d006886 {ECO:0000313|EMBL:ONM25409.1};	C4IZS6_MAIZE	C4IZS6	Amidase 1	SubName: Full=Amidase 1 {ECO:0000313|EMBL:ONM25409.1};	zma:100384731	IPR000120;IPR020556;IPR023631;IPR036928	NP_001170670.1	KOG1211;COG0154	EOG09360DTS	PF01425	PS00571	PTHR11895
	TRINITY_DN771_c0_g4_i1	tr|C5XQZ2|C5XQZ2_SORBI	Sorghum bicolor (Sorghum) (Sorghum vulgare)	SORBI_3003G217800	ORFNames=SORBI_3003G217800 {ECO:0000313|EMBL:EES01060.1};	C5XQZ2_SORBI	C5XQZ2	GTP-binding nuclear protein	RecName: Full=GTP-binding nuclear protein {ECO:0000256|RuleBase:RU363057};	sbi:8084813	IPR027417;IPR002041;IPR005225;IPR001806	XP_002455940.1	KOG0096;ENOG410XNRS	EOG09360M7X	PF00071	PS51418	PTHR24071	TIGR00231
	TRINITY_DN703_c0_g1_i12	tr|K3XVE4|K3XVE4_SETIT	Setaria italica (Foxtail millet) (Panicum italicum)	LOC101777022 SETIT_005901mg	Name=LOC101777022 {ECO:0000313|EnsemblPlants:Si005901m}; ORFNames=SETIT_005901mg {ECO:0000313|EMBL:KQL08958.1};	K3XVE4_SETIT	K3XVE4	Uncharacterized protein	SubName: Full=Uncharacterized protein {ECO:0000313|EMBL:KQL08958.1, ECO:0000313|EnsemblPlants:Si005901m};	sita:101777022	IPR003593;IPR003959;IPR003960;IPR027417	XP_004964309.1	KOG0733;COG0464	EOG093602RA	PF00004	PS00674
	TRINITY_DN703_c0_g1_i17	tr|K3XVE4|K3XVE4_SETIT	Setaria italica (Foxtail millet) (Panicum italicum)	LOC101777022 SETIT_005901mg	Name=LOC101777022 {ECO:0000313|EnsemblPlants:Si005901m}; ORFNames=SETIT_005901mg {ECO:0000313|EMBL:KQL08958.1};	K3XVE4_SETIT	K3XVE4	Uncharacterized protein	SubName: Full=Uncharacterized protein {ECO:0000313|EMBL:KQL08958.1, ECO:0000313|EnsemblPlants:Si005901m};	sita:101777022	IPR003593;IPR003959;IPR003960;IPR027417	XP_004964309.1	KOG0733;COG0464	EOG093602RA	PF00004	PS00674
	TRINITY_DN703_c0_g1_i5	tr|K3XVE4|K3XVE4_SETIT	Setaria italica (Foxtail millet) (Panicum italicum)	LOC101777022 SETIT_005901mg	Name=LOC101777022 {ECO:0000313|EnsemblPlants:Si005901m}; ORFNames=SETIT_005901mg {ECO:0000313|EMBL:KQL08958.1};	K3XVE4_SETIT	K3XVE4	Uncharacterized protein	SubName: Full=Uncharacterized protein {ECO:0000313|EMBL:KQL08958.1, ECO:0000313|EnsemblPlants:Si005901m};	sita:101777022	IPR003593;IPR003959;IPR003960;IPR027417	XP_004964309.1	KOG0733;COG0464	EOG093602RA	PF00004	PS00674
	TRINITY_DN703_c0_g1_i1	tr|K3XVE4|K3XVE4_SETIT	Setaria italica (Foxtail millet) (Panicum italicum)	LOC101777022 SETIT_005901mg	Name=LOC101777022 {ECO:0000313|EnsemblPlants:Si005901m}; ORFNames=SETIT_005901mg {ECO:0000313|EMBL:KQL08958.1};	K3XVE4_SETIT	K3XVE4	Uncharacterized protein	SubName: Full=Uncharacterized protein {ECO:0000313|EMBL:KQL08958.1, ECO:0000313|EnsemblPlants:Si005901m};	sita:101777022	IPR003593;IPR003959;IPR003960;IPR027417	XP_004964309.1	KOG0733;COG0464	EOG093602RA	PF00004	PS00674
	TRINITY_DN703_c0_g1_i6	tr|K3XVE4|K3XVE4_SETIT	Setaria italica (Foxtail millet) (Panicum italicum)	LOC101777022 SETIT_005901mg	Name=LOC101777022 {ECO:0000313|EnsemblPlants:Si005901m}; ORFNames=SETIT_005901mg {ECO:0000313|EMBL:KQL08958.1};	K3XVE4_SETIT	K3XVE4	Uncharacterized protein	SubName: Full=Uncharacterized protein {ECO:0000313|EMBL:KQL08958.1, ECO:0000313|EnsemblPlants:Si005901m};	sita:101777022	IPR003593;IPR003959;IPR003960;IPR027417	XP_004964309.1	KOG0733;COG0464	EOG093602RA	PF00004	PS00674
	TRINITY_DN703_c0_g1_i8	tr|K3XVE4|K3XVE4_SETIT	Setaria italica (Foxtail millet) (Panicum italicum)	LOC101777022 SETIT_005901mg	Name=LOC101777022 {ECO:0000313|EnsemblPlants:Si005901m}; ORFNames=SETIT_005901mg {ECO:0000313|EMBL:KQL08958.1};	K3XVE4_SETIT	K3XVE4	Uncharacterized protein	SubName: Full=Uncharacterized protein {ECO:0000313|EMBL:KQL08958.1, ECO:0000313|EnsemblPlants:Si005901m};	sita:101777022	IPR003593;IPR003959;IPR003960;IPR027417	XP_004964309.1	KOG0733;COG0464	EOG093602RA	PF00004	PS00674
	TRINITY_DN703_c0_g1_i13	tr|K3XVE4|K3XVE4_SETIT	Setaria italica (Foxtail millet) (Panicum italicum)	LOC101777022 SETIT_005901mg	Name=LOC101777022 {ECO:0000313|EnsemblPlants:Si005901m}; ORFNames=SETIT_005901mg {ECO:0000313|EMBL:KQL08958.1};	K3XVE4_SETIT	K3XVE4	Uncharacterized protein	SubName: Full=Uncharacterized protein {ECO:0000313|EMBL:KQL08958.1, ECO:0000313|EnsemblPlants:Si005901m};	sita:101777022	IPR003593;IPR003959;IPR003960;IPR027417	XP_004964309.1	KOG0733;COG0464	EOG093602RA	PF00004	PS00674
	TRINITY_DN703_c0_g1_i2	tr|K3XVE4|K3XVE4_SETIT	Setaria italica (Foxtail millet) (Panicum italicum)	LOC101777022 SETIT_005901mg	Name=LOC101777022 {ECO:0000313|EnsemblPlants:Si005901m}; ORFNames=SETIT_005901mg {ECO:0000313|EMBL:KQL08958.1};	K3XVE4_SETIT	K3XVE4	Uncharacterized protein	SubName: Full=Uncharacterized protein {ECO:0000313|EMBL:KQL08958.1, ECO:0000313|EnsemblPlants:Si005901m};	sita:101777022	IPR003593;IPR003959;IPR003960;IPR027417	XP_004964309.1	KOG0733;COG0464	EOG093602RA	PF00004	PS00674
	TRINITY_DN4419_c0_g3_i1	sp|Q27527|ENO_CAEEL	Caenorhabditis elegans	enol-1 T21B10.2	Name=enol-1; ORFNames=T21B10.2;	ENO_CAEEL	Q27527	Enolase; 2-phospho-D-glycerate hydro-lyase; 2-phosphoglycerate dehydratase	RecName: Full=Enolase; EC=4.2.1.11; AltName: Full=2-phospho-D-glycerate hydro-lyase; AltName: Full=2-phosphoglycerate dehydratase;	cel:CELE_T21B10.2	IPR000941;IPR036849;IPR029017;IPR034390;IPR020810;IPR020809;IPR020811	NP_001022349.1;NP_495900.1;NP_871916.1	KOG2670;COG0148	EOG091G07NH	PF00113;PF03952	PS00164	PTHR11902	TIGR01060
	TRINITY_DN4406_c0_g1_i8	tr|A0A0Q3I7A8|A0A0Q3I7A8_BRADI	Brachypodium distachyon (Purple false brome) (Trachynia distachya)	BRADI_3g22720	ORFNames=BRADI_3g22720 {ECO:0000313|EMBL:KQJ96371.1};	A0A0Q3I7A8_BRADI	A0A0Q3I7A8	Uncharacterized protein	SubName: Full=Uncharacterized protein {ECO:0000313|EMBL:KQJ96371.1};	bdi:100842158	IPR002885;IPR033443;IPR011990	XP_003573820.1			PF01535;PF13041;PF17177	PS51375		TIGR00756
	TRINITY_DN4406_c0_g1_i6	tr|A0A0Q3I7A8|A0A0Q3I7A8_BRADI	Brachypodium distachyon (Purple false brome) (Trachynia distachya)	BRADI_3g22720	ORFNames=BRADI_3g22720 {ECO:0000313|EMBL:KQJ96371.1};	A0A0Q3I7A8_BRADI	A0A0Q3I7A8	Uncharacterized protein	SubName: Full=Uncharacterized protein {ECO:0000313|EMBL:KQJ96371.1};	bdi:100842158	IPR002885;IPR033443;IPR011990	XP_003573820.1			PF01535;PF13041;PF17177	PS51375		TIGR00756
	TRINITY_DN4497_c0_g1_i10	tr|I1ITZ6|I1ITZ6_BRADI	Brachypodium distachyon (Purple false brome) (Trachynia distachya)	LOC100827529 BRADI_4g41377	Name=LOC100827529 {ECO:0000313|EnsemblPlants:BRADI4G41377.1}; ORFNames=BRADI_4g41377 {ECO:0000313|EMBL:KQJ92041.1};	I1ITZ6_BRADI	I1ITZ6	Uncharacterized protein	SubName: Full=Uncharacterized protein {ECO:0000313|EMBL:KQJ92041.1, ECO:0000313|EnsemblPlants:BRADI4G41377.1};	bdi:100827529	IPR024709;IPR019378	XP_003578848.1	ENOG410IJW8;ENOG410XT6Z	EOG093608QN	PF10250
	TRINITY_DN4497_c0_g1_i12	tr|I1ITZ6|I1ITZ6_BRADI	Brachypodium distachyon (Purple false brome) (Trachynia distachya)	LOC100827529 BRADI_4g41377	Name=LOC100827529 {ECO:0000313|EnsemblPlants:BRADI4G41377.1}; ORFNames=BRADI_4g41377 {ECO:0000313|EMBL:KQJ92041.1};	I1ITZ6_BRADI	I1ITZ6	Uncharacterized protein	SubName: Full=Uncharacterized protein {ECO:0000313|EMBL:KQJ92041.1, ECO:0000313|EnsemblPlants:BRADI4G41377.1};	bdi:100827529	IPR024709;IPR019378	XP_003578848.1	ENOG410IJW8;ENOG410XT6Z	EOG093608QN	PF10250
	TRINITY_DN4497_c0_g1_i7	tr|I1ITZ6|I1ITZ6_BRADI	Brachypodium distachyon (Purple false brome) (Trachynia distachya)	LOC100827529 BRADI_4g41377	Name=LOC100827529 {ECO:0000313|EnsemblPlants:BRADI4G41377.1}; ORFNames=BRADI_4g41377 {ECO:0000313|EMBL:KQJ92041.1};	I1ITZ6_BRADI	I1ITZ6	Uncharacterized protein	SubName: Full=Uncharacterized protein {ECO:0000313|EMBL:KQJ92041.1, ECO:0000313|EnsemblPlants:BRADI4G41377.1};	bdi:100827529	IPR024709;IPR019378	XP_003578848.1	ENOG410IJW8;ENOG410XT6Z	EOG093608QN	PF10250
	TRINITY_DN4497_c0_g1_i4	tr|I1ITZ6|I1ITZ6_BRADI	Brachypodium distachyon (Purple false brome) (Trachynia distachya)	LOC100827529 BRADI_4g41377	Name=LOC100827529 {ECO:0000313|EnsemblPlants:BRADI4G41377.1}; ORFNames=BRADI_4g41377 {ECO:0000313|EMBL:KQJ92041.1};	I1ITZ6_BRADI	I1ITZ6	Uncharacterized protein	SubName: Full=Uncharacterized protein {ECO:0000313|EMBL:KQJ92041.1, ECO:0000313|EnsemblPlants:BRADI4G41377.1};	bdi:100827529	IPR024709;IPR019378	XP_003578848.1	ENOG410IJW8;ENOG410XT6Z	EOG093608QN	PF10250
	TRINITY_DN4440_c0_g1_i1	tr|I1IMX3|I1IMX3_BRADI	Brachypodium distachyon (Purple false brome) (Trachynia distachya)	LOC100827707 BRADI_4g23680	Name=LOC100827707 {ECO:0000313|EnsemblPlants:BRADI4G23680.1}; ORFNames=BRADI_4g23680 {ECO:0000313|EMBL:KQJ89128.1};	I1IMX3_BRADI	I1IMX3	Uncharacterized protein	SubName: Full=Uncharacterized protein {ECO:0000313|EMBL:KQJ89128.1, ECO:0000313|EnsemblPlants:BRADI4G23680.1};	bdi:100827707	IPR011989;IPR016024;IPR000225;IPR000008;IPR035892	XP_010237876.1	ENOG410ITMA;ENOG410YBZK	EOG0936003Q	PF00514;PF00168	PS50176;PS50004
	TRINITY_DN4440_c0_g1_i2	tr|I1IMX3|I1IMX3_BRADI	Brachypodium distachyon (Purple false brome) (Trachynia distachya)	LOC100827707 BRADI_4g23680	Name=LOC100827707 {ECO:0000313|EnsemblPlants:BRADI4G23680.1}; ORFNames=BRADI_4g23680 {ECO:0000313|EMBL:KQJ89128.1};	I1IMX3_BRADI	I1IMX3	Uncharacterized protein	SubName: Full=Uncharacterized protein {ECO:0000313|EMBL:KQJ89128.1, ECO:0000313|EnsemblPlants:BRADI4G23680.1};	bdi:100827707	IPR011989;IPR016024;IPR000225;IPR000008;IPR035892	XP_010237876.1	ENOG410ITMA;ENOG410YBZK	EOG0936003Q	PF00514;PF00168	PS50176;PS50004
	TRINITY_DN4440_c0_g1_i5	tr|I1IMX3|I1IMX3_BRADI	Brachypodium distachyon (Purple false brome) (Trachynia distachya)	LOC100827707 BRADI_4g23680	Name=LOC100827707 {ECO:0000313|EnsemblPlants:BRADI4G23680.1}; ORFNames=BRADI_4g23680 {ECO:0000313|EMBL:KQJ89128.1};	I1IMX3_BRADI	I1IMX3	Uncharacterized protein	SubName: Full=Uncharacterized protein {ECO:0000313|EMBL:KQJ89128.1, ECO:0000313|EnsemblPlants:BRADI4G23680.1};	bdi:100827707	IPR011989;IPR016024;IPR000225;IPR000008;IPR035892	XP_010237876.1	ENOG410ITMA;ENOG410YBZK	EOG0936003Q	PF00514;PF00168	PS50176;PS50004
	TRINITY_DN4440_c0_g1_i3	tr|I1IMX3|I1IMX3_BRADI	Brachypodium distachyon (Purple false brome) (Trachynia distachya)	LOC100827707 BRADI_4g23680	Name=LOC100827707 {ECO:0000313|EnsemblPlants:BRADI4G23680.1}; ORFNames=BRADI_4g23680 {ECO:0000313|EMBL:KQJ89128.1};	I1IMX3_BRADI	I1IMX3	Uncharacterized protein	SubName: Full=Uncharacterized protein {ECO:0000313|EMBL:KQJ89128.1, ECO:0000313|EnsemblPlants:BRADI4G23680.1};	bdi:100827707	IPR011989;IPR016024;IPR000225;IPR000008;IPR035892	XP_010237876.1	ENOG410ITMA;ENOG410YBZK	EOG0936003Q	PF00514;PF00168	PS50176;PS50004
	TRINITY_DN4499_c0_g2_i2	sp|Q5Z8Z7|2ABA_ORYSJ	Oryza sativa subsp. japonica (Rice)	Os06g0563300, LOC_Os06g36770 P0656E03.30	OrderedLocusNames=Os06g0563300, LOC_Os06g36770; ORFNames=P0656E03.30;	2ABA_ORYSJ	Q5Z8Z7	Serine/threonine protein phosphatase 2A 55 kDa regulatory subunit B alpha isoform; PP2A, subunit B, alpha isoform	RecName: Full=Serine/threonine protein phosphatase 2A 55 kDa regulatory subunit B alpha isoform; Short=PP2A, subunit B, alpha isoform;	osa:4341313	IPR000009;IPR018067;IPR015943;IPR001680;IPR019775;IPR036322	XP_015643857.1	KOG1354;COG5170		PF00400	PS01024;PS00678	PTHR11871
	TRINITY_DN4499_c0_g2_i3	sp|Q5Z8Z7|2ABA_ORYSJ	Oryza sativa subsp. japonica (Rice)	Os06g0563300, LOC_Os06g36770 P0656E03.30	OrderedLocusNames=Os06g0563300, LOC_Os06g36770; ORFNames=P0656E03.30;	2ABA_ORYSJ	Q5Z8Z7	Serine/threonine protein phosphatase 2A 55 kDa regulatory subunit B alpha isoform; PP2A, subunit B, alpha isoform	RecName: Full=Serine/threonine protein phosphatase 2A 55 kDa regulatory subunit B alpha isoform; Short=PP2A, subunit B, alpha isoform;	osa:4341313	IPR000009;IPR018067;IPR015943;IPR001680;IPR019775;IPR036322	XP_015643857.1	KOG1354;COG5170		PF00400	PS01024;PS00678	PTHR11871
	TRINITY_DN2899_c1_g1_i1	tr|I1IQN1|I1IQN1_BRADI	Brachypodium distachyon (Purple false brome) (Trachynia distachya)	LOC100826583 BRADI_4g31890	Name=LOC100826583 {ECO:0000313|EnsemblPlants:BRADI4G31890.1}; ORFNames=BRADI_4g31890 {ECO:0000313|EMBL:KQJ90484.1};	I1IQN1_BRADI	I1IQN1	Hexosyltransferase	RecName: Full=Hexosyltransferase {ECO:0000256|RuleBase:RU363063}; EC=2.4.1.- {ECO:0000256|RuleBase:RU363063};	bdi:100826583	IPR025298;IPR002659	XP_003576598.1	KOG2288;ENOG410XV5H	EOG09360C0B	PF13334;PF01762		PTHR11214
	TRINITY_DN2825_c0_g1_i8	tr|K3Z8Z7|K3Z8Z7_SETIT	Setaria italica (Foxtail millet) (Panicum italicum)	LOC101782523 SETIT_023017mg	Name=LOC101782523 {ECO:0000313|EnsemblPlants:Si023017m}; ORFNames=SETIT_023017mg {ECO:0000313|EMBL:KQL17414.1};	K3Z8Z7_SETIT	K3Z8Z7	Uncharacterized protein	SubName: Full=Uncharacterized protein {ECO:0000313|EMBL:KQL17414.1, ECO:0000313|EnsemblPlants:Si023017m};	sita:101782523	IPR001841;IPR013083;IPR017907	XP_004963314.1	KOG0823;ENOG4111IHV	EOG09360NN7		PS00518;PS50089
	TRINITY_DN2898_c0_g1_i2	tr|I1GRS8|I1GRS8_BRADI	Brachypodium distachyon (Purple false brome) (Trachynia distachya)	LOC100841202 BRADI_1g19710	Name=LOC100841202 {ECO:0000313|EnsemblPlants:BRADI1G19710.1}; ORFNames=BRADI_1g19710 {ECO:0000313|EMBL:KQK14948.1};	I1GRS8_BRADI	I1GRS8	Uncharacterized protein	SubName: Full=Uncharacterized protein {ECO:0000313|EMBL:KQK14948.1, ECO:0000313|EnsemblPlants:BRADI1G19710.1};	bdi:100841202	IPR011419;IPR023335	XP_003562570.1	KOG3015;COG5387	EOG09360JSG	PF07542		PTHR21013
	TRINITY_DN71526_c0_g1_i1	tr|A0A1S2XA75|A0A1S2XA75_CICAR	Cicer arietinum (Chickpea) (Garbanzo)	LOC101488894	Name=LOC101488894 {ECO:0000313|RefSeq:XP_004486120.1};	A0A1S2XA75_CICAR	A0A1S2XA75	polyadenylate-binding protein RBP45-like	SubName: Full=polyadenylate-binding protein RBP45-like {ECO:0000313|RefSeq:XP_004486120.1};	cam:101488894	IPR035979;IPR000504	XP_004486120.1			PF00076	PS50102
	TRINITY_DN71569_c0_g1_i5	tr|K4A9P3|K4A9P3_SETIT	Setaria italica (Foxtail millet) (Panicum italicum)	LOC101779063 SETIT_035599mg	Name=LOC101779063 {ECO:0000313|EnsemblPlants:Si035599m}; ORFNames=SETIT_035599mg {ECO:0000313|EMBL:KQK91062.1};	K4A9P3_SETIT	K4A9P3	Uncharacterized protein	SubName: Full=Uncharacterized protein {ECO:0000313|EMBL:KQK91062.1, ECO:0000313|EnsemblPlants:Si035599m};	sita:101779063	IPR035979;IPR000504	XP_004984515.1	KOG4206;ENOG410XPZI	EOG09360C45	PF00076	PS50102
	TRINITY_DN71549_c0_g1_i2	sp|Q9SSD2|PRP8A_ARATH	Arabidopsis thaliana (Mouse-ear cress)	PRP8A EMB14, EMB177, EMB33, SOF81, SUS2 At1g80070 F18B13.15	Name=PRP8A {ECO:0000303|PubMed:19261069}; Synonyms=EMB14 {ECO:0000303|Ref.3}, EMB177 {ECO:0000303|Ref.3}, EMB33 {ECO:0000303|Ref.3}, SOF81 {ECO:0000303|PubMed:24725596}, SUS2 {ECO:0000303|Ref.3}; OrderedLocusNames=At1g80070 {ECO:0000312|Araport:AT1G80070}; ORFNames=F18B13.15 {ECO:0000312|EMBL:AAD55467.1};	PRP8A_ARATH	Q9SSD2	Pre-mRNA-processing-splicing factor 8A; PRP8 homolog A; AtPRP8A; Protein ABNORMAL SUSPENSOR 2; Protein EMBRYO DEFECTIVE 14; Protein EMBRYO DEFECTIVE 177; Protein EMBRYO DEFECTIVE 33; Protein SUPPRESSOR OF OVEREXPRESSED FCA 81	RecName: Full=Pre-mRNA-processing-splicing factor 8A {ECO:0000305}; AltName: Full=PRP8 homolog A {ECO:0000305}; Short=AtPRP8A {ECO:0000303|PubMed:19261069}; AltName: Full=Protein ABNORMAL SUSPENSOR 2 {ECO:0000303|Ref.3}; AltName: Full=Protein EMBRYO DEFECTIVE 14 {ECO:0000303|Ref.3}; AltName: Full=Protein EMBRYO DEFECTIVE 177 {ECO:0000303|Ref.3}; AltName: Full=Protein EMBRYO DEFECTIVE 33 {ECO:0000…	ath:AT1G80070	IPR000555;IPR037518;IPR012591;IPR012592;IPR012984;IPR027652;IPR021983;IPR019581;IPR019580;IPR012337;IPR019582	NP_178124.2	KOG1795;COG5178	EOG0936000U	PF01398;PF08082;PF08083;PF08084;PF12134;PF10598;PF10597;PF10596	PS50249	PTHR11140
	TRINITY_DN71549_c0_g4_i1	sp|Q9SSD2|PRP8A_ARATH	Arabidopsis thaliana (Mouse-ear cress)	PRP8A EMB14, EMB177, EMB33, SOF81, SUS2 At1g80070 F18B13.15	Name=PRP8A {ECO:0000303|PubMed:19261069}; Synonyms=EMB14 {ECO:0000303|Ref.3}, EMB177 {ECO:0000303|Ref.3}, EMB33 {ECO:0000303|Ref.3}, SOF81 {ECO:0000303|PubMed:24725596}, SUS2 {ECO:0000303|Ref.3}; OrderedLocusNames=At1g80070 {ECO:0000312|Araport:AT1G80070}; ORFNames=F18B13.15 {ECO:0000312|EMBL:AAD55467.1};	PRP8A_ARATH	Q9SSD2	Pre-mRNA-processing-splicing factor 8A; PRP8 homolog A; AtPRP8A; Protein ABNORMAL SUSPENSOR 2; Protein EMBRYO DEFECTIVE 14; Protein EMBRYO DEFECTIVE 177; Protein EMBRYO DEFECTIVE 33; Protein SUPPRESSOR OF OVEREXPRESSED FCA 81	RecName: Full=Pre-mRNA-processing-splicing factor 8A {ECO:0000305}; AltName: Full=PRP8 homolog A {ECO:0000305}; Short=AtPRP8A {ECO:0000303|PubMed:19261069}; AltName: Full=Protein ABNORMAL SUSPENSOR 2 {ECO:0000303|Ref.3}; AltName: Full=Protein EMBRYO DEFECTIVE 14 {ECO:0000303|Ref.3}; AltName: Full=Protein EMBRYO DEFECTIVE 177 {ECO:0000303|Ref.3}; AltName: Full=Protein EMBRYO DEFECTIVE 33 {ECO:0000…	ath:AT1G80070	IPR000555;IPR037518;IPR012591;IPR012592;IPR012984;IPR027652;IPR021983;IPR019581;IPR019580;IPR012337;IPR019582	NP_178124.2	KOG1795;COG5178	EOG0936000U	PF01398;PF08082;PF08083;PF08084;PF12134;PF10598;PF10597;PF10596	PS50249	PTHR11140
	TRINITY_DN20934_c1_g1_i7	tr|A9SIW4|A9SIW4_PHYPA	Physcomitrella patens subsp. patens (Moss)	PHYPADRAFT_165148	ORFNames=PHYPADRAFT_165148 {ECO:0000313|EMBL:EDQ68962.1};	A9SIW4_PHYPA	A9SIW4	Predicted protein	SubName: Full=Predicted protein {ECO:0000313|EMBL:EDQ68962.1};	ppp:PHYPADRAFT_165148	IPR004457	XP_001766330.1	KOG2703;COG1779		PF03367			TIGR00310
	TRINITY_DN20934_c1_g1_i2	tr|A9SIW4|A9SIW4_PHYPA	Physcomitrella patens subsp. patens (Moss)	PHYPADRAFT_165148	ORFNames=PHYPADRAFT_165148 {ECO:0000313|EMBL:EDQ68962.1};	A9SIW4_PHYPA	A9SIW4	Predicted protein	SubName: Full=Predicted protein {ECO:0000313|EMBL:EDQ68962.1};	ppp:PHYPADRAFT_165148	IPR004457	XP_001766330.1	KOG2703;COG1779		PF03367			TIGR00310
	TRINITY_DN35038_c0_g1_i7	tr|I1HCC1|I1HCC1_BRADI	Brachypodium distachyon (Purple false brome) (Trachynia distachya)	LOC100843660 BRADI_2g04117	Name=LOC100843660 {ECO:0000313|EnsemblPlants:BRADI2G04117.1}; ORFNames=BRADI_2g04117 {ECO:0000313|EMBL:KQK02853.1};	I1HCC1_BRADI	I1HCC1	Uncharacterized protein	SubName: Full=Uncharacterized protein {ECO:0000313|EMBL:KQK02853.1, ECO:0000313|EnsemblPlants:BRADI2G04117.1};	bdi:100843660	IPR019140	XP_003569157.1	KOG2545;ENOG410XNU0	EOG093605Q4	PF09739		PTHR13489
	TRINITY_DN35038_c0_g1_i5	tr|I1HCC1|I1HCC1_BRADI	Brachypodium distachyon (Purple false brome) (Trachynia distachya)	LOC100843660 BRADI_2g04117	Name=LOC100843660 {ECO:0000313|EnsemblPlants:BRADI2G04117.1}; ORFNames=BRADI_2g04117 {ECO:0000313|EMBL:KQK02853.1};	I1HCC1_BRADI	I1HCC1	Uncharacterized protein	SubName: Full=Uncharacterized protein {ECO:0000313|EMBL:KQK02853.1, ECO:0000313|EnsemblPlants:BRADI2G04117.1};	bdi:100843660	IPR019140	XP_003569157.1	KOG2545;ENOG410XNU0	EOG093605Q4	PF09739		PTHR13489
	TRINITY_DN35038_c0_g1_i6	tr|I1HCC1|I1HCC1_BRADI	Brachypodium distachyon (Purple false brome) (Trachynia distachya)	LOC100843660 BRADI_2g04117	Name=LOC100843660 {ECO:0000313|EnsemblPlants:BRADI2G04117.1}; ORFNames=BRADI_2g04117 {ECO:0000313|EMBL:KQK02853.1};	I1HCC1_BRADI	I1HCC1	Uncharacterized protein	SubName: Full=Uncharacterized protein {ECO:0000313|EMBL:KQK02853.1, ECO:0000313|EnsemblPlants:BRADI2G04117.1};	bdi:100843660	IPR019140	XP_003569157.1	KOG2545;ENOG410XNU0	EOG093605Q4	PF09739		PTHR13489
	TRINITY_DN35063_c0_g1_i1	tr|O81930|O81930_CICAR	Cicer arietinum (Chickpea) (Garbanzo)	LOC101501911	Name=LOC101501911 {ECO:0000313|RefSeq:NP_001266121.1};	O81930_CICAR	O81930	Cysteine proteinase; cysteine proteinase 15A-like precursor	SubName: Full=Cysteine proteinase {ECO:0000313|EMBL:CAA08906.1}; SubName: Full=cysteine proteinase 15A-like precursor {ECO:0000313|RefSeq:NP_001266121.1};	cam:101501911	IPR025661;IPR000169;IPR025660;IPR013128;IPR000668;IPR013201	NP_001266121.1			PF08246;PF00112	PS00640;PS00139;PS00639	PTHR12411
	TRINITY_DN59810_c0_g1_i2	tr|C1FHE0|C1FHE0_MICCC	Micromonas commoda (strain RCC299 / NOUM17 / CCMP2709) (Picoplanktonic green alga)	MICPUN_109058	ORFNames=MICPUN_109058 {ECO:0000313|EMBL:ACO69802.1};	C1FHE0_MICCC	C1FHE0	Uncharacterized protein	SubName: Full=Uncharacterized protein {ECO:0000313|EMBL:ACO69802.1};	mis:MICPUN_109058	IPR025131;IPR003034;IPR036361	XP_002508544.1			PF13266;PF02037	PS50800
	TRINITY_DN59810_c0_g1_i1	tr|C1FHE0|C1FHE0_MICCC	Micromonas commoda (strain RCC299 / NOUM17 / CCMP2709) (Picoplanktonic green alga)	MICPUN_109058	ORFNames=MICPUN_109058 {ECO:0000313|EMBL:ACO69802.1};	C1FHE0_MICCC	C1FHE0	Uncharacterized protein	SubName: Full=Uncharacterized protein {ECO:0000313|EMBL:ACO69802.1};	mis:MICPUN_109058	IPR025131;IPR003034;IPR036361	XP_002508544.1			PF13266;PF02037	PS50800
	TRINITY_DN59885_c0_g2_i1	tr|V7C7H4|V7C7H4_PHAVU	Phaseolus vulgaris (Kidney bean) (French bean)	PHAVU_003G090100g	ORFNames=PHAVU_003G090100g {ECO:0000313|EMBL:ESW26089.1};	V7C7H4_PHAVU	V7C7H4	Uncharacterized protein	SubName: Full=Uncharacterized protein {ECO:0000313|EMBL:ESW26089.1};	pvu:PHAVU_003G090100g		XP_007154095.1
	TRINITY_DN59885_c0_g3_i2	tr|A0A072TII3|A0A072TII3_MEDTR	Medicago truncatula (Barrel medic) (Medicago tribuloides)	25480018 MTR_0052s0170	Name=25480018 {ECO:0000313|EnsemblPlants:KEH17031}; ORFNames=MTR_0052s0170 {ECO:0000313|EMBL:KEH17031.1};	A0A072TII3_MEDTR	A0A072TII3	Uncharacterized protein	SubName: Full=Uncharacterized protein {ECO:0000313|EMBL:KEH17031.1, ECO:0000313|EnsemblPlants:KEH17031};	mtr:MTR_0052s0170		XP_013443006.1
	TRINITY_DN59885_c2_g2_i1	tr|Q8CM04|Q8CM04_COREF	Corynebacterium efficiens (strain DSM 44549 / YS-314 / AJ 12310 / JCM 11189 / NBRC 100395)			Q8CM04_COREF	Q8CM04	Uncharacterized protein	SubName: Full=Uncharacterized protein {ECO:0000313|EMBL:BAC18353.1};	cef:CE1543				POG091H113U
	TRINITY_DN59848_c0_g1_i1	tr|A0A1U7WH24|A0A1U7WH24_NICSY	Nicotiana sylvestris (Wood tobacco) (South American tobacco)	LOC104224074	Name=LOC104224074 {ECO:0000313|RefSeq:XP_009773938.1, ECO:0000313|RefSeq:XP_009773939.1};	A0A1U7WH24_NICSY	A0A1U7WH24	splicing factor 3B subunit 1	SubName: Full=splicing factor 3B subunit 1 {ECO:0000313|RefSeq:XP_009773938.1, ECO:0000313|RefSeq:XP_009773939.1};	nsy:104224074	IPR011989;IPR016024;IPR021133;IPR015016;IPR034085	XP_009773938.1;XP_009773939.1			PF08920	PS50077
	TRINITY_DN59848_c0_g1_i2	tr|A0A1U7WH24|A0A1U7WH24_NICSY	Nicotiana sylvestris (Wood tobacco) (South American tobacco)	LOC104224074	Name=LOC104224074 {ECO:0000313|RefSeq:XP_009773938.1, ECO:0000313|RefSeq:XP_009773939.1};	A0A1U7WH24_NICSY	A0A1U7WH24	splicing factor 3B subunit 1	SubName: Full=splicing factor 3B subunit 1 {ECO:0000313|RefSeq:XP_009773938.1, ECO:0000313|RefSeq:XP_009773939.1};	nsy:104224074	IPR011989;IPR016024;IPR021133;IPR015016;IPR034085	XP_009773938.1;XP_009773939.1			PF08920	PS50077
	TRINITY_DN64305_c0_g3_i1	tr|I1H1F7|I1H1F7_BRADI	Brachypodium distachyon (Purple false brome) (Trachynia distachya)	LOC100840758 BRADI_1g50497	Name=LOC100840758 {ECO:0000313|EnsemblPlants:BRADI1G50497.1}; ORFNames=BRADI_1g50497 {ECO:0000313|EMBL:KQK19794.1};	I1H1F7_BRADI	I1H1F7	Uncharacterized protein	SubName: Full=Uncharacterized protein {ECO:0000313|EMBL:KQK19794.1, ECO:0000313|EnsemblPlants:BRADI1G50497.1};	bdi:100840758	IPR009606	XP_003557165.1	ENOG410ISN7;ENOG41120RW	EOG09360NM4	PF06749
	TRINITY_DN64305_c0_g3_i2	tr|I1H1F7|I1H1F7_BRADI	Brachypodium distachyon (Purple false brome) (Trachynia distachya)	LOC100840758 BRADI_1g50497	Name=LOC100840758 {ECO:0000313|EnsemblPlants:BRADI1G50497.1}; ORFNames=BRADI_1g50497 {ECO:0000313|EMBL:KQK19794.1};	I1H1F7_BRADI	I1H1F7	Uncharacterized protein	SubName: Full=Uncharacterized protein {ECO:0000313|EMBL:KQK19794.1, ECO:0000313|EnsemblPlants:BRADI1G50497.1};	bdi:100840758	IPR009606	XP_003557165.1	ENOG410ISN7;ENOG41120RW	EOG09360NM4	PF06749
	TRINITY_DN64305_c0_g4_i1	tr|I1H1F7|I1H1F7_BRADI	Brachypodium distachyon (Purple false brome) (Trachynia distachya)	LOC100840758 BRADI_1g50497	Name=LOC100840758 {ECO:0000313|EnsemblPlants:BRADI1G50497.1}; ORFNames=BRADI_1g50497 {ECO:0000313|EMBL:KQK19794.1};	I1H1F7_BRADI	I1H1F7	Uncharacterized protein	SubName: Full=Uncharacterized protein {ECO:0000313|EMBL:KQK19794.1, ECO:0000313|EnsemblPlants:BRADI1G50497.1};	bdi:100840758	IPR009606	XP_003557165.1	ENOG410ISN7;ENOG41120RW	EOG09360NM4	PF06749
	TRINITY_DN64382_c2_g1_i2	tr|A0A1U7YLA6|A0A1U7YLA6_NICSY	Nicotiana sylvestris (Wood tobacco) (South American tobacco)	LOC104250021	Name=LOC104250021 {ECO:0000313|RefSeq:XP_009804857.1};	A0A1U7YLA6_NICSY	A0A1U7YLA6	uncharacterized protein LOC104250021	SubName: Full=uncharacterized protein LOC104250021 {ECO:0000313|RefSeq:XP_009804857.1};	nsy:104250021	IPR000477	XP_009804857.1			PF00078	PS50878
	TRINITY_DN64346_c0_g2_i1	tr|A0A087STU1|A0A087STU1_AUXPR	Auxenochlorella protothecoides (Green microalga) (Chlorella protothecoides)	F751_5501, g.1853	ORFNames=F751_5501 {ECO:0000313|EMBL:KFM29145.1}, g.1853 {ECO:0000313|EMBL:JAT76964.1};	A0A087STU1_AUXPR	A0A087STU1	40S ribosomal protein S4	RecName: Full=40S ribosomal protein S4 {ECO:0000256|PIRNR:PIRNR002116};	apro:F751_5501	IPR032277;IPR005824;IPR000876;IPR013845;IPR013843;IPR018199;IPR002942;IPR036986	XP_011402198.1			PF16121;PF00467;PF00900;PF08071;PF01479	PS00528;PS50889	PTHR11581
	TRINITY_DN90421_c0_g1_i1	tr|I1GLF3|I1GLF3_BRADI	Brachypodium distachyon (Purple false brome) (Trachynia distachya)	LOC100842013 BRADI_1g03380	Name=LOC100842013 {ECO:0000313|EnsemblPlants:BRADI1G03380.1}; ORFNames=BRADI_1g03380 {ECO:0000313|EMBL:KQK12385.1};	I1GLF3_BRADI	I1GLF3	Uncharacterized protein	SubName: Full=Uncharacterized protein {ECO:0000313|EMBL:KQK12385.1, ECO:0000313|EnsemblPlants:BRADI1G03380.1};	bdi:100842013	IPR013517	XP_003563417.1	ENOG410IEFE;ENOG410ZQCN	EOG0936021C	PF01839
	TRINITY_DN90498_c0_g1_i1	tr|B7G0L5|B7G0L5_PHATC	Phaeodactylum tricornutum (strain CCAP 1055/1)	PHATRDRAFT_27762	ORFNames=PHATRDRAFT_27762 {ECO:0000313|EMBL:EEC48108.1};	B7G0L5_PHATC	B7G0L5	Predicted protein	SubName: Full=Predicted protein {ECO:0000313|EMBL:EEC48108.1};	pti:PHATRDRAFT_27762	IPR027230;IPR000608;IPR023313;IPR016135	XP_002180700.1			PF00179	PS00183;PS50127	PTHR43927
	TRINITY_DN90498_c0_g1_i2	tr|B7G0L5|B7G0L5_PHATC	Phaeodactylum tricornutum (strain CCAP 1055/1)	PHATRDRAFT_27762	ORFNames=PHATRDRAFT_27762 {ECO:0000313|EMBL:EEC48108.1};	B7G0L5_PHATC	B7G0L5	Predicted protein	SubName: Full=Predicted protein {ECO:0000313|EMBL:EEC48108.1};	pti:PHATRDRAFT_27762	IPR027230;IPR000608;IPR023313;IPR016135	XP_002180700.1			PF00179	PS00183;PS50127	PTHR43927
	TRINITY_DN62542_c0_g1_i1	tr|A0A067JRU1|A0A067JRU1_JATCU	Jatropha curcas (Barbados nut)	JCGZ_26055	ORFNames=JCGZ_26055 {ECO:0000313|EMBL:KDP22224.1};	A0A067JRU1_JATCU	A0A067JRU1	Uncharacterized protein	SubName: Full=Uncharacterized protein {ECO:0000313|EMBL:KDP22224.1};	jcu:105648415	IPR003594;IPR036890;IPR019805;IPR037196;IPR001404;IPR020575;IPR020568	XP_012090182.1			PF02518;PF00183	PS00298	PTHR11528
	TRINITY_DN62542_c1_g3_i2	tr|L8H6U2|L8H6U2_ACACA	Acanthamoeba castellanii str. Neff	ACA1_205910	ORFNames=ACA1_205910 {ECO:0000313|EMBL:ELR20453.1};	L8H6U2_ACACA	L8H6U2	Heat shock protein 90 alpha, putative	SubName: Full=Heat shock protein 90 alpha, putative {ECO:0000313|EMBL:ELR20453.1};	acan:ACA1_205910	IPR003594;IPR036890;IPR019805;IPR037196;IPR001404;IPR020575;IPR020568	XP_004367478.1			PF02518;PF00183	PS00298	PTHR11528
	TRINITY_DN62552_c0_g1_i1	tr|A0A1U7YP21|A0A1U7YP21_NELNU	Nelumbo nucifera (Sacred lotus)	LOC104586258	Name=LOC104586258 {ECO:0000313|RefSeq:XP_010241731.1, ECO:0000313|RefSeq:XP_010241733.1};	A0A1U7YP21_NELNU	A0A1U7YP21	serine decarboxylase-like	SubName: Full=serine decarboxylase-like {ECO:0000313|RefSeq:XP_010241731.1, ECO:0000313|RefSeq:XP_010241733.1};	nnu:104586258	IPR002129;IPR015424;IPR015421;IPR015422;IPR021115	XP_010241731.1;XP_010241733.1			PF00282	PS00392
	TRINITY_DN66581_c0_g1_i1	tr|M0RVB5|M0RVB5_MUSAM	Musa acuminata subsp. malaccensis (Wild banana) (Musa malaccensis)	103972398	Name=103972398 {ECO:0000313|EnsemblPlants:GSMUA_Achr11P25350_001};	M0RVB5_MUSAM	M0RVB5	Uncharacterized protein	SubName: Full=Uncharacterized protein {ECO:0000313|EnsemblPlants:GSMUA_Achr11P25350_001};	mus:103972398	IPR001580;IPR018124;IPR009169;IPR009033;IPR013320	XP_009385001.1		EOG09360F0J	PF00262	PS00803;PS00804	PTHR11073
	TRINITY_DN66570_c0_g1_i3	tr|B7FSZ7|B7FSZ7_PHATC	Phaeodactylum tricornutum (strain CCAP 1055/1)	PHATRDRAFT_25433	ORFNames=PHATRDRAFT_25433 {ECO:0000313|EMBL:EEC50885.1};	B7FSZ7_PHATC	B7FSZ7	Predicted protein	SubName: Full=Predicted protein {ECO:0000313|EMBL:EEC50885.1};	pti:PHATRDRAFT_25433	IPR000169;IPR025660;IPR013128;IPR000668;IPR013201	XP_002178071.1			PF08246;PF00112	PS00139;PS00639	PTHR12411
	TRINITY_DN66500_c0_g1_i4	tr|A0A1Y6KMX7|A0A1Y6KMX7_9BRAD	Bradyrhizobium sp. ORS 285	BRAD285_6343	ORFNames=BRAD285_6343 {ECO:0000313|EMBL:SMX61072.1};	A0A1Y6KMX7_9BRAD	A0A1Y6KMX7	Uncharacterized protein	SubName: Full=Uncharacterized protein {ECO:0000313|EMBL:SMX61072.1};	bro:BRAD285_6343
	TRINITY_DN66589_c0_g1_i2	tr|L8H0Y2|L8H0Y2_ACACA	Acanthamoeba castellanii str. Neff	ACA1_335920	ORFNames=ACA1_335920 {ECO:0000313|EMBL:ELR19129.1};	L8H0Y2_ACACA	L8H0Y2	Polyubiquitin, putative	SubName: Full=Polyubiquitin, putative {ECO:0000313|EMBL:ELR19129.1};	acan:ACA1_335920	IPR019956;IPR029071;IPR019954;IPR000626	XP_004341200.1			PF00240	PS00299;PS50053
	TRINITY_DN66554_c0_g1_i1	tr|C5YP92|C5YP92_SORBI	Sorghum bicolor (Sorghum) (Sorghum vulgare)	SORBI_3008G114000	ORFNames=SORBI_3008G114000 {ECO:0000313|EMBL:EES16079.1};	C5YP92_SORBI	C5YP92	Uncharacterized protein	SubName: Full=Uncharacterized protein {ECO:0000313|EMBL:EES16079.1};	sbi:8064626		XP_002442241.1	ENOG410JXI2;ENOG41103Y7	EOG09360CVF
	TRINITY_DN66537_c0_g1_i1	tr|L0NJ34|L0NJ34_9RHIZ	Rhizobium sp. NT-26	NT26_3368, NT26_3891	ORFNames=NT26_3368 {ECO:0000313|EMBL:CCF21090.1}, NT26_3891 {ECO:0000313|EMBL:CCF21613.1};	L0NJ34_9RHIZ	L0NJ34	Uncharacterized protein	SubName: Full=Uncharacterized protein {ECO:0000313|EMBL:CCF21090.1};	rht:NT26_3368;rht:NT26_3891
	TRINITY_DN66537_c2_g1_i1	tr|B0THV2|B0THV2_HELMI	Heliobacterium modesticaldum (strain ATCC 51547 / Ice1)	HM1_3125	ORFNames=HM1_3125 {ECO:0000313|EMBL:ABZ84885.1};	B0THV2_HELMI	B0THV2	Uncharacterized protein	SubName: Full=Uncharacterized protein {ECO:0000313|EMBL:ABZ84885.1};	hmo:HM1_3125				POG091H1JLT
	TRINITY_DN58135_c0_g2_i1	tr|A9U2B4|A9U2B4_PHYPA	Physcomitrella patens subsp. patens (Moss)	PHYPADRAFT_154659, PHYPADRAFT_154682, PHYPADRAFT_200520	ORFNames=PHYPADRAFT_154659 {ECO:0000313|EMBL:EDQ50190.1}, PHYPADRAFT_154682 {ECO:0000313|EMBL:EDQ50178.1}, PHYPADRAFT_200520 {ECO:0000313|EMBL:EDQ50188.1};	A9U2B4_PHYPA	A9U2B4	Predicted protein	SubName: Full=Predicted protein {ECO:0000313|EMBL:EDQ50188.1};	ppp:PHYPADRAFT_154659;ppp:PHYPADRAFT_154682;ppp:PHYPADRAFT_200520	IPR002113;IPR002067;IPR018108;IPR023395	XP_001784997.1;XP_001785007.1;XP_001785009.1	KOG0749;ENOG410XNW0		PF00153	PS50920
	TRINITY_DN58170_c0_g1_i1	tr|C4J0P5|C4J0P5_MAIZE	Zea mays (Maize)			C4J0P5_MAIZE	C4J0P5	Uncharacterized protein	SubName: Full=Uncharacterized protein {ECO:0000313|EMBL:ACR34745.1};	zma:100384860		NP_001170767.1
	TRINITY_DN80020_c0_g3_i1	tr|A0A1U8JQH7|A0A1U8JQH7_GOSHI	Gossypium hirsutum (Upland cotton) (Gossypium mexicanum)	LOC107907772	Name=LOC107907772 {ECO:0000313|RefSeq:XP_016690579.1};	A0A1U8JQH7_GOSHI	A0A1U8JQH7	histone H3-like centromeric protein CSE4	SubName: Full=histone H3-like centromeric protein CSE4 {ECO:0000313|RefSeq:XP_016690579.1};	ghi:107907772	IPR009072;IPR007125;IPR000164	XP_016690579.1			PF00125	PS00322;PS00959	PTHR11426
	TRINITY_DN80020_c0_g5_i3	tr|I1G9C5|I1G9C5_AMPQE	Amphimedon queenslandica (Sponge)			I1G9C5_AMPQE	I1G9C5	Histone H3	RecName: Full=Histone H3 {ECO:0000256|RuleBase:RU004471};	aqu:100634637;aqu:100636652	IPR009072;IPR007125;IPR000164	XP_003384122.1;XP_003384138.1		EOG091G0XGD	PF00125	PS00322;PS00959	PTHR11426
	TRINITY_DN38819_c0_g1_i1	tr|K3YGN4|K3YGN4_SETIT	Setaria italica (Foxtail millet) (Panicum italicum)	LOC101770744 SETIT_013402mg	Name=LOC101770744 {ECO:0000313|EnsemblPlants:Si013402m}; ORFNames=SETIT_013402mg {ECO:0000313|EMBL:KQL01120.1};	K3YGN4_SETIT	K3YGN4	Uncharacterized protein	SubName: Full=Uncharacterized protein {ECO:0000313|EMBL:KQL01120.1, ECO:0000313|EnsemblPlants:Si013402m};	sita:101770744	IPR036168;IPR028565;IPR018808	XP_004973059.1	ENOG410IU8I;ENOG4111F1F	EOG0936055H	PF10291	PS51072
	TRINITY_DN86373_c0_g1_i1	tr|A0A1S2YPS5|A0A1S2YPS5_CICAR	Cicer arietinum (Chickpea) (Garbanzo)	LOC101494314	Name=LOC101494314 {ECO:0000313|RefSeq:XP_004508035.1, ECO:0000313|RefSeq:XP_012573378.1};	A0A1S2YPS5_CICAR	A0A1S2YPS5	Sucrose synthase	RecName: Full=Sucrose synthase {ECO:0000256|RuleBase:RU280817}; EC=2.4.1.13 {ECO:0000256|RuleBase:RU280817};	cam:101494314	IPR001296;IPR000368;IPR012820	XP_004508035.1;XP_012573378.1			PF00534;PF00862			TIGR02470
[truncated: 8,998 more rows]
