# Supplementary material for: Insight into the mechanisms of terminal HS-tolerance in wheat mutant with improved nutritional quality through de novo transcriptome sequencing
Source: Research Square preprint supplement (doi:10.21203/rs.3.rs-241832/v1), 2021-02-26
Supplement: Supplementary file 7 [file 43fb87a88f901c0a5a0ece17.docx]

**Table S2.** Total reads and clean reads obtained from the de novo transcriptome sequencing of parent (P3), mutant (M3) and HS-treated mutant (M3H) using Illumina HiSeq 4000 platform.

| **Samples** | **Total Reads** | **QC Passed Reads** | **QC Pass %** | **Aligned Reads** | **Align %** |
| --- | --- | --- | --- | --- | --- |
| P3-R1 | 63820718 | 61815468 | 96.86% | 59969946 | 97.01% |
| P3-R2 | 66260772 | 65031642 | 98.15% | 62782480 | 96.54% |
| M3-R1 | 81344316 | 80444546 | 98.89% | 78402173 | 97.46% |
| M3-R2 | 71004868 | 70391456 | 99.14% | 68264027 | 96.98% |
| M3HS-R1 | 76047646 | 73850514 | 97.11% | 70499870 | 95.46% |
| M3HS-R2 | 61846286 | 59124836 | 95.60% | 56784563 | 96.04% |

**Manuscript title:** Insight into the mechanisms of terminal HS-tolerance in wheat mutant with improved nutritional quality through de novo transcriptome sequencing

**Author’s List:** Ranjeet R. Kumar, Suman Bakshi, Kavita Dubey, Sumedha Hasija, Gyanendra K. Rai, Neelu Jain, Sanjay Jambhulkar, Bhupinder Singh, Gyanendra P. Singh, & Shelly Praveen
