# Supplementary material for: Insight into the mechanisms of terminal HS-tolerance in wheat mutant with improved nutritional quality through de novo transcriptome sequencing
Source: Research Square preprint supplement (doi:10.21203/rs.3.rs-241832/v1), 2021-02-26
Supplement: Supplementary file 9 [file 6607b02fb3d3edd1ef272b0c.xlsx]

## Sheet: NGS_P6252_Annotation
Insight into the mechanisms of terminal HS-tolerance in wheat mutant with improved nutritional quality through de novo transcriptome sequencing Ranjeet R. Kumar, Suman Bakshi, Kavita Dubey, Sumedha Hasija, Gyanendra K. Rai, Neelu Jain, Sanjay Jambhulkar, Bhupinder Singh, Gyanendra P. Singh, & Shelly Praveen
Table S4B List of annotated transcripts identified from the de novo transcriptome sequencing of wheat mutant (M3), parent (P3) and mutant under heat stress (M3H) and their Gene Ontology analysis for characterizing the associated pathways
qseqid	sseqid	length	evalue	bitscore	qcovhsp	name	protein_name	description
TRINITY_DN78243_c0_g1_i1	tr|A0A287KV03|A0A287KV03_HORVV	52	3.3e-20	106.3	54.2	A0A287KV03_HORVV	Uncharacterized protein	SubName: Full=Uncharacterized protein {ECO:0000313|EnsemblPlants:HORVU3Hr1G040640.5};
TRINITY_DN78231_c0_g1_i1	tr|A0A1D5SVX9|A0A1D5SVX9_WHEAT	198	3.4e-83	316.6	99.3	A0A1D5SVX9_WHEAT	Uncharacterized protein	SubName: Full=Uncharacterized protein {ECO:0000313|EnsemblPlants:TRIAE_CS42_1DL_TGACv1_062439_AA0214510.1};
TRINITY_DN78231_c0_g1_i2	tr|A0A1D5X979|A0A1D5X979_WHEAT	260	2.3e-139	503.8	84.3	A0A1D5X979_WHEAT	Uncharacterized protein	SubName: Full=Uncharacterized protein {ECO:0000313|EnsemblPlants:TRIAE_CS42_4AL_TGACv1_292177_AA0998020.1};
TRINITY_DN78205_c0_g1_i3	tr|A0A1D6AA43|A0A1D6AA43_WHEAT	78	3.6e-35	156	81.8	A0A1D6AA43_WHEAT	Uncharacterized protein	SubName: Full=Uncharacterized protein {ECO:0000313|EnsemblPlants:TRIAE_CS42_6AL_TGACv1_472424_AA1521920.1};
TRINITY_DN78205_c0_g1_i4	tr|A0A1D6AA43|A0A1D6AA43_WHEAT	114	1.3e-55	224.2	99.7	A0A1D6AA43_WHEAT	Uncharacterized protein	SubName: Full=Uncharacterized protein {ECO:0000313|EnsemblPlants:TRIAE_CS42_6AL_TGACv1_472424_AA1521920.1};
TRINITY_DN78205_c0_g1_i2	tr|A0A1D6AA43|A0A1D6AA43_WHEAT	84	4.2e-35	155.6	99.2	A0A1D6AA43_WHEAT	Uncharacterized protein	SubName: Full=Uncharacterized protein {ECO:0000313|EnsemblPlants:TRIAE_CS42_6AL_TGACv1_472424_AA1521920.1};
TRINITY_DN78205_c0_g2_i1	tr|A0A1D6B4D8|A0A1D6B4D8_WHEAT	125	6.9e-58	231.9	99.2	A0A1D6B4D8_WHEAT	Uncharacterized protein	SubName: Full=Uncharacterized protein {ECO:0000313|EnsemblPlants:TRIAE_CS42_6DL_TGACv1_526595_AA1687820.1};
TRINITY_DN78214_c0_g1_i1	tr|A0A0B4SV41|A0A0B4SV41_WHEAT	139	3e-71	276.6	88.2	A0A0B4SV41_WHEAT	Germin-like protein	SubName: Full=Germin-like protein {ECO:0000313|EMBL:AJA71638.1};
TRINITY_DN78248_c0_g1_i1	tr|A0A1D6AMG5|A0A1D6AMG5_WHEAT	164	1.4e-12	82	79.6	A0A1D6AMG5_WHEAT	Uncharacterized protein	SubName: Full=Uncharacterized protein {ECO:0000313|EnsemblPlants:TRIAE_CS42_6BL_TGACv1_499788_AA1591710.1};
TRINITY_DN78248_c0_g1_i2	tr|M7YZA3|M7YZA3_TRIUA	34	0.00018	54.3	30	M7YZA3_TRIUA	Myb-related protein Myb4	SubName: Full=Myb-related protein Myb4 {ECO:0000313|EMBL:EMS52516.1, ECO:0000313|EnsemblPlants:TRIUR3_30803-P1};
TRINITY_DN78224_c0_g1_i2	tr|M8AKL4|M8AKL4_AEGTA	32	2.5e-07	65.1	11.4	M8AKL4_AEGTA	Uncharacterized protein	SubName: Full=Uncharacterized protein {ECO:0000313|EMBL:EMT05041.1, ECO:0000313|EnsemblPlants:EMT05041};
TRINITY_DN78258_c0_g1_i1	tr|A0A287RZQ4|A0A287RZQ4_HORVV	35	1.1e-07	64.3	49.3	A0A287RZQ4_HORVV	Uncharacterized protein	SubName: Full=Uncharacterized protein {ECO:0000313|EnsemblPlants:HORVU5Hr1G081070.16};
TRINITY_DN78212_c0_g1_i5	tr|A0A1D6D106|A0A1D6D106_WHEAT	43	1.8e-05	59.7	8.7	A0A1D6D106_WHEAT	Uncharacterized protein	SubName: Full=Uncharacterized protein {ECO:0000313|EnsemblPlants:TRIAE_CS42_7DS_TGACv1_622550_AA2041620.1};
TRINITY_DN78212_c0_g1_i3	tr|A0A1D6D106|A0A1D6D106_WHEAT	43	8.6e-06	59.7	18.6	A0A1D6D106_WHEAT	Uncharacterized protein	SubName: Full=Uncharacterized protein {ECO:0000313|EnsemblPlants:TRIAE_CS42_7DS_TGACv1_622550_AA2041620.1};
TRINITY_DN78212_c0_g1_i7	tr|A0A1D6D106|A0A1D6D106_WHEAT	43	6.2e-06	59.7	25.6	A0A1D6D106_WHEAT	Uncharacterized protein	SubName: Full=Uncharacterized protein {ECO:0000313|EnsemblPlants:TRIAE_CS42_7DS_TGACv1_622550_AA2041620.1};
TRINITY_DN78275_c0_g1_i3	tr|M8BCQ5|M8BCQ5_AEGTA	38	0.00072	53.1	18.2	M8BCQ5_AEGTA	Uncharacterized protein	SubName: Full=Uncharacterized protein {ECO:0000313|EMBL:EMT04548.1, ECO:0000313|EnsemblPlants:EMT04548};
TRINITY_DN78275_c0_g1_i1	tr|M8BCQ5|M8BCQ5_AEGTA	34	9.2e-07	62.8	16.1	M8BCQ5_AEGTA	Uncharacterized protein	SubName: Full=Uncharacterized protein {ECO:0000313|EMBL:EMT04548.1, ECO:0000313|EnsemblPlants:EMT04548};
TRINITY_DN78275_c0_g1_i2	tr|M8BCQ5|M8BCQ5_AEGTA	34	8.2e-07	62.8	18.1	M8BCQ5_AEGTA	Uncharacterized protein	SubName: Full=Uncharacterized protein {ECO:0000313|EMBL:EMT04548.1, ECO:0000313|EnsemblPlants:EMT04548};
TRINITY_DN78202_c0_g1_i1	tr|A0A1D5U6Y8|A0A1D5U6Y8_WHEAT	274	2e-166	594	74	A0A1D5U6Y8_WHEAT	Uncharacterized protein	SubName: Full=Uncharacterized protein {ECO:0000313|EnsemblPlants:TRIAE_CS42_2BS_TGACv1_145935_AA0449990.1};
TRINITY_DN78202_c1_g2_i1	tr|A0A287WPL0|A0A287WPL0_HORVV	33	6.1e-07	62.4	30.7	A0A287WPL0_HORVV	Uncharacterized protein	SubName: Full=Uncharacterized protein {ECO:0000313|EnsemblPlants:HORVU7Hr1G063030.14};
TRINITY_DN78261_c0_g1_i1	tr|W5GQV6|W5GQV6_WHEAT	83	5.2e-38	165.2	99.6	W5GQV6_WHEAT	Uncharacterized protein	SubName: Full=Uncharacterized protein {ECO:0000313|EnsemblPlants:TRIAE_CS42_6BS_TGACv1_513384_AA1639790.2};
TRINITY_DN78261_c0_g2_i1	tr|A0A1D6DAA6|A0A1D6DAA6_WHEAT	66	3.2e-31	142.5	90.4	A0A1D6DAA6_WHEAT	Uncharacterized protein	SubName: Full=Uncharacterized protein {ECO:0000313|EnsemblPlants:TRIAE_CS42_U_TGACv1_641242_AA2089500.1};
TRINITY_DN78261_c0_g3_i2	tr|A0A1D6AEA5|A0A1D6AEA5_WHEAT	72	2.7e-30	139.4	99.1	A0A1D6AEA5_WHEAT	Uncharacterized protein	SubName: Full=Uncharacterized protein {ECO:0000313|EnsemblPlants:TRIAE_CS42_6AS_TGACv1_485359_AA1543920.1};
TRINITY_DN78262_c0_g1_i1	tr|A0A1D5YGT2|A0A1D5YGT2_WHEAT	94	2.2e-48	199.9	99.6	A0A1D5YGT2_WHEAT	Uncharacterized protein	SubName: Full=Uncharacterized protein {ECO:0000313|EnsemblPlants:TRIAE_CS42_5AL_TGACv1_374946_AA1212560.1};
TRINITY_DN78262_c1_g1_i1	tr|A0A1D5YGT2|A0A1D5YGT2_WHEAT	191	2.3e-51	211.5	63.2	A0A1D5YGT2_WHEAT	Uncharacterized protein	SubName: Full=Uncharacterized protein {ECO:0000313|EnsemblPlants:TRIAE_CS42_5AL_TGACv1_374946_AA1212560.1};
TRINITY_DN78206_c0_g1_i1	tr|A0A1D5TFM2|A0A1D5TFM2_WHEAT	52	2.1e-20	106.7	64.5	A0A1D5TFM2_WHEAT	Eukaryotic translation initiation factor 3 subunit I	RecName: Full=Eukaryotic translation initiation factor 3 subunit I {ECO:0000256|SAAS:SAAS00338492};
TRINITY_DN78206_c0_g1_i2	tr|A0A1D5TFM2|A0A1D5TFM2_WHEAT	74	8.3e-35	154.5	98.7	A0A1D5TFM2_WHEAT	Eukaryotic translation initiation factor 3 subunit I	RecName: Full=Eukaryotic translation initiation factor 3 subunit I {ECO:0000256|SAAS:SAAS00338492};
TRINITY_DN78206_c1_g1_i1	tr|A0A1D5TFM2|A0A1D5TFM2_WHEAT	78	4.6e-36	158.7	99.6	A0A1D5TFM2_WHEAT	Eukaryotic translation initiation factor 3 subunit I	RecName: Full=Eukaryotic translation initiation factor 3 subunit I {ECO:0000256|SAAS:SAAS00338492};
TRINITY_DN78220_c0_g1_i1	tr|A0A287NRR9|A0A287NRR9_HORVV	110	2.1e-10	75.5	33	A0A287NRR9_HORVV	Uncharacterized protein	SubName: Full=Uncharacterized protein {ECO:0000313|EnsemblPlants:HORVU4Hr1G033390.1};
TRINITY_DN78279_c0_g1_i1	tr|M4FJ30|M4FJ30_BRARP	189	2.1e-63	253.1	20.6	M4FJ30_BRARP	Uncharacterized protein	SubName: Full=Uncharacterized protein {ECO:0000313|EnsemblPlants:Bra041110.1-P};
TRINITY_DN78279_c0_g2_i3	tr|A0A1D5ZEP2|A0A1D5ZEP2_WHEAT	248	1.4e-64	255.4	80.6	A0A1D5ZEP2_WHEAT	Uncharacterized protein	SubName: Full=Uncharacterized protein {ECO:0000313|EnsemblPlants:TRIAE_CS42_5BS_TGACv1_423274_AA1372880.1};
TRINITY_DN78279_c0_g2_i2	tr|M4FJ30|M4FJ30_BRARP	146	2.7e-41	177.2	74.4	M4FJ30_BRARP	Uncharacterized protein	SubName: Full=Uncharacterized protein {ECO:0000313|EnsemblPlants:Bra041110.1-P};
TRINITY_DN78279_c0_g2_i7	tr|M4FJ30|M4FJ30_BRARP	356	2.1e-80	308.5	78.4	M4FJ30_BRARP	Uncharacterized protein	SubName: Full=Uncharacterized protein {ECO:0000313|EnsemblPlants:Bra041110.1-P};
TRINITY_DN78279_c0_g2_i5	tr|M4FJ30|M4FJ30_BRARP	98	4.1e-42	179.1	99.3	M4FJ30_BRARP	Uncharacterized protein	SubName: Full=Uncharacterized protein {ECO:0000313|EnsemblPlants:Bra041110.1-P};
TRINITY_DN78279_c0_g2_i1	tr|M4FJ30|M4FJ30_BRARP	346	3.6e-98	367.5	80	M4FJ30_BRARP	Uncharacterized protein	SubName: Full=Uncharacterized protein {ECO:0000313|EnsemblPlants:Bra041110.1-P};
TRINITY_DN78279_c0_g2_i6	tr|M4FJ30|M4FJ30_BRARP	146	4.4e-41	177.2	45.4	M4FJ30_BRARP	Uncharacterized protein	SubName: Full=Uncharacterized protein {ECO:0000313|EnsemblPlants:Bra041110.1-P};
TRINITY_DN78279_c0_g2_i4	tr|M4FJ30|M4FJ30_BRARP	314	1.7e-102	381.7	78.4	M4FJ30_BRARP	Uncharacterized protein	SubName: Full=Uncharacterized protein {ECO:0000313|EnsemblPlants:Bra041110.1-P};
TRINITY_DN78200_c0_g1_i7	tr|A0A077S3Y4|A0A077S3Y4_WHEAT	55	5.7e-14	86.3	35.6	A0A077S3Y4_WHEAT	Uncharacterized protein	SubName: Full=Uncharacterized protein {ECO:0000313|EMBL:CDM84311.1};
TRINITY_DN78200_c0_g1_i4	tr|A0A077RHU3|A0A077RHU3_WHEAT	142	1.2e-64	256.1	32.3	A0A077RHU3_WHEAT	Uncharacterized protein	SubName: Full=Uncharacterized protein {ECO:0000313|EMBL:CDJ26690.1};
TRINITY_DN78200_c0_g1_i8	tr|A0A077RHU3|A0A077RHU3_WHEAT	142	7.7e-65	256.1	50	A0A077RHU3_WHEAT	Uncharacterized protein	SubName: Full=Uncharacterized protein {ECO:0000313|EMBL:CDJ26690.1};
TRINITY_DN78200_c0_g1_i5	tr|A0A077S3Y4|A0A077S3Y4_WHEAT	231	6e-103	382.5	96.2	A0A077S3Y4_WHEAT	Uncharacterized protein	SubName: Full=Uncharacterized protein {ECO:0000313|EMBL:CDM84311.1};
TRINITY_DN78200_c0_g1_i3	tr|A0A077RHU3|A0A077RHU3_WHEAT	74	2e-29	136.7	88.4	A0A077RHU3_WHEAT	Uncharacterized protein	SubName: Full=Uncharacterized protein {ECO:0000313|EMBL:CDJ26690.1};
TRINITY_DN78200_c0_g1_i9	tr|A0A077RHU3|A0A077RHU3_WHEAT	199	1.2e-97	365.2	67.7	A0A077RHU3_WHEAT	Uncharacterized protein	SubName: Full=Uncharacterized protein {ECO:0000313|EMBL:CDJ26690.1};
TRINITY_DN78222_c0_g1_i1	tr|A0A287WI45|A0A287WI45_HORVV	47	8.1e-11	77	12.4	A0A287WI45_HORVV	Uncharacterized protein	SubName: Full=Uncharacterized protein {ECO:0000313|EnsemblPlants:HORVU7Hr1G052800.6};
TRINITY_DN78222_c0_g1_i2	tr|A0A287WI45|A0A287WI45_HORVV	47	8.1e-11	77	12.5	A0A287WI45_HORVV	Uncharacterized protein	SubName: Full=Uncharacterized protein {ECO:0000313|EnsemblPlants:HORVU7Hr1G052800.6};
TRINITY_DN78222_c0_g1_i6	tr|A0A287WI45|A0A287WI45_HORVV	47	6.6e-11	77	15.4	A0A287WI45_HORVV	Uncharacterized protein	SubName: Full=Uncharacterized protein {ECO:0000313|EnsemblPlants:HORVU7Hr1G052800.6};
TRINITY_DN78289_c0_g1_i3	tr|A0A1D5YVR4|A0A1D5YVR4_WHEAT	39	7.3e-11	75.9	26.8	A0A1D5YVR4_WHEAT	Uncharacterized protein	SubName: Full=Uncharacterized protein {ECO:0000313|EnsemblPlants:TRIAE_CS42_5AS_TGACv1_394304_AA1279400.2};
TRINITY_DN78289_c0_g1_i2	tr|A0A1D5YVR4|A0A1D5YVR4_WHEAT	39	3e-10	74.3	19	A0A1D5YVR4_WHEAT	Uncharacterized protein	SubName: Full=Uncharacterized protein {ECO:0000313|EnsemblPlants:TRIAE_CS42_5AS_TGACv1_394304_AA1279400.2};
TRINITY_DN78289_c0_g1_i1	tr|A0A1D5YVR4|A0A1D5YVR4_WHEAT	39	2.9e-10	74.3	19.5	A0A1D5YVR4_WHEAT	Uncharacterized protein	SubName: Full=Uncharacterized protein {ECO:0000313|EnsemblPlants:TRIAE_CS42_5AS_TGACv1_394304_AA1279400.2};
TRINITY_DN78215_c0_g1_i1	tr|A0A1I8BPT0|A0A1I8BPT0_MELHA	83	1.9e-32	147.9	45.1	A0A1I8BPT0_MELHA	Uncharacterized protein	SubName: Full=Uncharacterized protein {ECO:0000313|WBParaSite:MhA1_Contig400.frz3.gene18};
TRINITY_DN78215_c0_g1_i2	tr|A0A1I8BPT0|A0A1I8BPT0_MELHA	83	1.9e-32	147.9	45.1	A0A1I8BPT0_MELHA	Uncharacterized protein	SubName: Full=Uncharacterized protein {ECO:0000313|WBParaSite:MhA1_Contig400.frz3.gene18};
TRINITY_DN78269_c0_g1_i2	tr|A0A0Q3H8R8|A0A0Q3H8R8_BRADI	41	0.0006	52.8	31	A0A0Q3H8R8_BRADI	Uncharacterized protein	SubName: Full=Uncharacterized protein {ECO:0000313|EMBL:KQJ89714.1};
TRINITY_DN78223_c0_g1_i3	tr|A0A1D5Y042|A0A1D5Y042_WHEAT	35	8.4e-12	80.1	11	A0A1D5Y042_WHEAT	Uncharacterized protein	SubName: Full=Uncharacterized protein {ECO:0000313|EnsemblPlants:TRIAE_CS42_4DL_TGACv1_343436_AA1134370.1};
TRINITY_DN78293_c0_g1_i4	tr|A0A1D5YRY9|A0A1D5YRY9_WHEAT	56	0.00056	53.1	31.5	A0A1D5YRY9_WHEAT	Uncharacterized protein	SubName: Full=Uncharacterized protein {ECO:0000313|EnsemblPlants:TRIAE_CS42_5AS_TGACv1_392526_AA1259960.1};
TRINITY_DN78293_c0_g1_i2	tr|A0A1D5YRY9|A0A1D5YRY9_WHEAT	31	0.00013	54.3	37.3	A0A1D5YRY9_WHEAT	Uncharacterized protein	SubName: Full=Uncharacterized protein {ECO:0000313|EnsemblPlants:TRIAE_CS42_5AS_TGACv1_392526_AA1259960.1};
TRINITY_DN78293_c1_g1_i3	tr|A0A077RT05|A0A077RT05_WHEAT	46	5.1e-12	81.3	10.8	A0A077RT05_WHEAT	Uncharacterized protein	SubName: Full=Uncharacterized protein {ECO:0000313|EMBL:CDM83272.1};
TRINITY_DN78293_c1_g1_i2	tr|A0A1D5YRY9|A0A1D5YRY9_WHEAT	66	3.5e-15	90.9	28.2	A0A1D5YRY9_WHEAT	Uncharacterized protein	SubName: Full=Uncharacterized protein {ECO:0000313|EnsemblPlants:TRIAE_CS42_5AS_TGACv1_392526_AA1259960.1};
TRINITY_DN78293_c1_g1_i5	tr|A0A1D5YRY9|A0A1D5YRY9_WHEAT	66	3.5e-15	90.9	28.2	A0A1D5YRY9_WHEAT	Uncharacterized protein	SubName: Full=Uncharacterized protein {ECO:0000313|EnsemblPlants:TRIAE_CS42_5AS_TGACv1_392526_AA1259960.1};
TRINITY_DN78293_c1_g1_i1	tr|A0A077RT05|A0A077RT05_WHEAT	114	2e-33	152.1	30	A0A077RT05_WHEAT	Uncharacterized protein	SubName: Full=Uncharacterized protein {ECO:0000313|EMBL:CDM83272.1};
TRINITY_DN78293_c6_g1_i1	tr|A0A1D6ATB0|A0A1D6ATB0_WHEAT	42	6.1e-09	68.6	55	A0A1D6ATB0_WHEAT	Uncharacterized protein	SubName: Full=Uncharacterized protein {ECO:0000313|EnsemblPlants:TRIAE_CS42_6BL_TGACv1_501954_AA1621890.1};
TRINITY_DN78241_c0_g1_i13	tr|T1N2H7|T1N2H7_TRIUA	72	1.3e-19	105.1	41.5	T1N2H7_TRIUA	Uncharacterized protein	SubName: Full=Uncharacterized protein {ECO:0000313|EnsemblPlants:TRIUR3_24570-P1};
TRINITY_DN78241_c0_g1_i7	tr|A0A1D5YX04|A0A1D5YX04_WHEAT	118	8.9e-25	121.7	98.2	A0A1D5YX04_WHEAT	Uncharacterized protein	SubName: Full=Uncharacterized protein {ECO:0000313|EnsemblPlants:TRIAE_CS42_5BL_TGACv1_404148_AA1286760.1};
TRINITY_DN78241_c0_g1_i22	tr|M7ZV44|M7ZV44_TRIUA	68	3.7e-29	139	8.9	M7ZV44_TRIUA	Uncharacterized protein	SubName: Full=Uncharacterized protein {ECO:0000313|EMBL:EMS63511.1, ECO:0000313|EnsemblPlants:TRIUR3_03843-P1};
TRINITY_DN78241_c0_g1_i15	tr|M7ZV44|M7ZV44_TRIUA	112	1.5e-39	173.7	13.1	M7ZV44_TRIUA	Uncharacterized protein	SubName: Full=Uncharacterized protein {ECO:0000313|EMBL:EMS63511.1, ECO:0000313|EnsemblPlants:TRIUR3_03843-P1};
TRINITY_DN78241_c0_g1_i19	tr|T1N2H7|T1N2H7_TRIUA	72	1.8e-19	105.1	31.1	T1N2H7_TRIUA	Uncharacterized protein	SubName: Full=Uncharacterized protein {ECO:0000313|EnsemblPlants:TRIUR3_24570-P1};
TRINITY_DN78241_c0_g1_i14	tr|M7ZV44|M7ZV44_TRIUA	68	5.5e-29	139	5.9	M7ZV44_TRIUA	Uncharacterized protein	SubName: Full=Uncharacterized protein {ECO:0000313|EMBL:EMS63511.1, ECO:0000313|EnsemblPlants:TRIUR3_03843-P1};
TRINITY_DN78241_c0_g1_i24	tr|M7ZV44|M7ZV44_TRIUA	68	3.8e-29	139	8.6	M7ZV44_TRIUA	Uncharacterized protein	SubName: Full=Uncharacterized protein {ECO:0000313|EMBL:EMS63511.1, ECO:0000313|EnsemblPlants:TRIUR3_03843-P1};
TRINITY_DN78241_c0_g1_i2	tr|M7ZV44|M7ZV44_TRIUA	68	5.7e-29	139	5.8	M7ZV44_TRIUA	Uncharacterized protein	SubName: Full=Uncharacterized protein {ECO:0000313|EMBL:EMS63511.1, ECO:0000313|EnsemblPlants:TRIUR3_03843-P1};
TRINITY_DN78241_c0_g1_i3	tr|M7ZV44|M7ZV44_TRIUA	68	5e-29	139	6.6	M7ZV44_TRIUA	Uncharacterized protein	SubName: Full=Uncharacterized protein {ECO:0000313|EMBL:EMS63511.1, ECO:0000313|EnsemblPlants:TRIUR3_03843-P1};
TRINITY_DN78241_c0_g1_i18	tr|M7ZV44|M7ZV44_TRIUA	68	4.8e-29	139	6.8	M7ZV44_TRIUA	Uncharacterized protein	SubName: Full=Uncharacterized protein {ECO:0000313|EMBL:EMS63511.1, ECO:0000313|EnsemblPlants:TRIUR3_03843-P1};
TRINITY_DN78241_c0_g1_i20	tr|T1N2H7|T1N2H7_TRIUA	72	3.1e-19	105.1	17.9	T1N2H7_TRIUA	Uncharacterized protein	SubName: Full=Uncharacterized protein {ECO:0000313|EnsemblPlants:TRIUR3_24570-P1};
TRINITY_DN78249_c0_g1_i1	tr|A0A1D6BZV8|A0A1D6BZV8_WHEAT	88	1.1e-42	181.4	65.8	A0A1D6BZV8_WHEAT	Uncharacterized protein	SubName: Full=Uncharacterized protein {ECO:0000313|EnsemblPlants:TRIAE_CS42_7AS_TGACv1_571077_AA1844260.1};
TRINITY_DN78249_c1_g1_i2	tr|A0A1D6BZV8|A0A1D6BZV8_WHEAT	54	8.4e-21	108.2	58.5	A0A1D6BZV8_WHEAT	Uncharacterized protein	SubName: Full=Uncharacterized protein {ECO:0000313|EnsemblPlants:TRIAE_CS42_7AS_TGACv1_571077_AA1844260.1};
TRINITY_DN78249_c1_g1_i1	tr|A0A1D6C7U2|A0A1D6C7U2_WHEAT	140	2.9e-41	176.8	99.3	A0A1D6C7U2_WHEAT	Uncharacterized protein	SubName: Full=Uncharacterized protein {ECO:0000313|EnsemblPlants:TRIAE_CS42_7BL_TGACv1_578103_AA1889510.1};
TRINITY_DN78208_c0_g1_i1	tr|A0A287VG89|A0A287VG89_HORVV	112	8.6e-44	184.9	99.1	A0A287VG89_HORVV	Uncharacterized protein	SubName: Full=Uncharacterized protein {ECO:0000313|EnsemblPlants:HORVU7Hr1G008100.3};
TRINITY_DN78208_c0_g1_i2	tr|A0A287VG89|A0A287VG89_HORVV	150	6.4e-57	229.6	62.6	A0A287VG89_HORVV	Uncharacterized protein	SubName: Full=Uncharacterized protein {ECO:0000313|EnsemblPlants:HORVU7Hr1G008100.3};
TRINITY_DN78290_c0_g1_i2	tr|A0A1D5WQZ8|A0A1D5WQZ8_WHEAT	200	4.2e-61	244.6	39	A0A1D5WQZ8_WHEAT	Uncharacterized protein	SubName: Full=Uncharacterized protein {ECO:0000313|EnsemblPlants:TRIAE_CS42_3DS_TGACv1_271685_AA0905510.1};
TRINITY_DN78290_c0_g1_i1	tr|A0A1D5W2I6|A0A1D5W2I6_WHEAT	204	4.4e-61	244.2	48.7	A0A1D5W2I6_WHEAT	Uncharacterized protein	SubName: Full=Uncharacterized protein {ECO:0000313|EnsemblPlants:TRIAE_CS42_3B_TGACv1_223526_AA0783560.1};
TRINITY_DN78290_c0_g2_i1	tr|M8BJR6|M8BJR6_AEGTA	791	6.5e-135	490.3	97.5	M8BJR6_AEGTA	Cysteine-rich receptor-like protein kinase 41	SubName: Full=Cysteine-rich receptor-like protein kinase 41 {ECO:0000313|EMBL:EMT22028.1, ECO:0000313|EnsemblPlants:EMT22028};
TRINITY_DN78290_c0_g3_i1	tr|A0A1D5ZBW4|A0A1D5ZBW4_WHEAT	452	1.2e-232	814.3	89.6	A0A1D5ZBW4_WHEAT	Uncharacterized protein	SubName: Full=Uncharacterized protein {ECO:0000313|EnsemblPlants:TRIAE_CS42_5BL_TGACv1_407510_AA1357580.1};
TRINITY_DN78295_c0_g1_i1	tr|A0A1D5UT16|A0A1D5UT16_WHEAT	116	4.4e-58	233	64.7	A0A1D5UT16_WHEAT	Uncharacterized protein	SubName: Full=Uncharacterized protein {ECO:0000313|EnsemblPlants:TRIAE_CS42_2DL_TGACv1_161210_AA0557440.2};
TRINITY_DN78230_c0_g2_i3	tr|A0A1D5S2S8|A0A1D5S2S8_WHEAT	66	2.8e-26	125.9	98	A0A1D5S2S8_WHEAT	Uncharacterized protein	SubName: Full=Uncharacterized protein {ECO:0000313|EnsemblPlants:TRIAE_CS42_1AS_TGACv1_019565_AA0068470.1};
TRINITY_DN78230_c0_g2_i2	tr|A0A1D6REY4|A0A1D6REY4_WHEAT	210	1.4e-108	401	99.7	A0A1D6REY4_WHEAT	Uncharacterized protein	SubName: Full=Uncharacterized protein {ECO:0000313|EnsemblPlants:TRIAE_CS42_1BS_TGACv1_049380_AA0151310.1};
TRINITY_DN78230_c0_g2_i1	tr|D0QEJ4|D0QEJ4_WHEAT	74	4.1e-34	152.1	98.2	D0QEJ4_WHEAT	Receptor-like kinase 2	SubName: Full=Receptor-like kinase 2 {ECO:0000313|EMBL:ACK44484.1, ECO:0000313|EnsemblPlants:TRIAE_CS42_1DS_TGACv1_080112_AA0239820.1};
TRINITY_DN78230_c0_g1_i4	tr|Q8LPW9|Q8LPW9_WHEAT	198	2.8e-98	367.1	75.9	Q8LPW9_WHEAT	Receptor-like kinase	SubName: Full=Receptor-like kinase {ECO:0000313|EMBL:AAK40358.1}; Flags: Fragment;
TRINITY_DN78230_c0_g1_i5	tr|Q6VTH8|Q6VTH8_WHEAT	197	5.1e-100	372.9	75.9	Q6VTH8_WHEAT	Resistance-related receptor-like kinase	SubName: Full=Resistance-related receptor-like kinase {ECO:0000313|EMBL:AAQ82627.2};
TRINITY_DN78230_c0_g3_i3	tr|Q9ATQ0|Q9ATQ0_WHEAT	149	3.8e-79	302.8	97.6	Q9ATQ0_WHEAT	LRK14	SubName: Full=LRK14 {ECO:0000313|EMBL:AAK20743.1};
TRINITY_DN78230_c0_g3_i2	tr|Q9ATQ6|Q9ATQ6_WHEAT	109	4.4e-34	152.5	99.4	Q9ATQ6_WHEAT	LRK19	SubName: Full=LRK19 {ECO:0000313|EMBL:AAK20738.1};
TRINITY_DN78230_c0_g3_i4	tr|W4ZVK7|W4ZVK7_WHEAT	88	2e-32	146.7	98.8	W4ZVK7_WHEAT	Uncharacterized protein	SubName: Full=Uncharacterized protein {ECO:0000313|EnsemblPlants:TRIAE_CS42_1AS_TGACv1_019203_AA0063090.1};
TRINITY_DN78230_c0_g3_i6	tr|Q9ATQ0|Q9ATQ0_WHEAT	171	2e-92	347.1	99.8	Q9ATQ0_WHEAT	LRK14	SubName: Full=LRK14 {ECO:0000313|EMBL:AAK20743.1};
TRINITY_DN78230_c0_g3_i5	tr|W4ZVK7|W4ZVK7_WHEAT	136	5.7e-63	248.8	99.5	W4ZVK7_WHEAT	Uncharacterized protein	SubName: Full=Uncharacterized protein {ECO:0000313|EnsemblPlants:TRIAE_CS42_1AS_TGACv1_019203_AA0063090.1};
TRINITY_DN78230_c0_g3_i1	tr|W4ZVK7|W4ZVK7_WHEAT	83	1.4e-32	147.5	78.1	W4ZVK7_WHEAT	Uncharacterized protein	SubName: Full=Uncharacterized protein {ECO:0000313|EnsemblPlants:TRIAE_CS42_1AS_TGACv1_019203_AA0063090.1};
TRINITY_DN78230_c0_g4_i1	tr|O81113|O81113_WHEAT	88	4.2e-39	169.1	91	O81113_WHEAT	Receptor-like kinase	SubName: Full=Receptor-like kinase {ECO:0000313|EMBL:AAC31303.1}; Flags: Fragment;
TRINITY_DN78230_c0_g4_i2	tr|Q00NV2|Q00NV2_WHEAT	113	3.9e-60	239.2	99.7	Q00NV2_WHEAT	Resistance-related receptor-like kinase	SubName: Full=Resistance-related receptor-like kinase {ECO:0000313|EMBL:ABB84340.1};
TRINITY_DN78268_c1_g1_i1	tr|N1QPH4|N1QPH4_AEGTA	346	3.5e-157	563.1	86.5	N1QPH4_AEGTA	Autophagy-related protein 7	SubName: Full=Autophagy-related protein 7 {ECO:0000313|EMBL:EMT01431.1, ECO:0000313|EnsemblPlants:EMT01431};
TRINITY_DN78256_c0_g1_i2	tr|A0A1D6DIU6|A0A1D6DIU6_WHEAT	90	8.4e-42	177.9	99.3	A0A1D6DIU6_WHEAT	Uncharacterized protein	SubName: Full=Uncharacterized protein {ECO:0000313|EnsemblPlants:TRIAE_CS42_U_TGACv1_643438_AA2132010.1};
TRINITY_DN78256_c0_g1_i4	tr|A0A1D5TX62|A0A1D5TX62_WHEAT	142	6.8e-62	245.4	99.5	A0A1D5TX62_WHEAT	Uncharacterized protein	SubName: Full=Uncharacterized protein {ECO:0000313|EnsemblPlants:TRIAE_CS42_2BL_TGACv1_129903_AA0399100.1};
TRINITY_DN78256_c0_g1_i3	tr|A0A1D6DIU6|A0A1D6DIU6_WHEAT	142	4e-62	246.1	99.5	A0A1D6DIU6_WHEAT	Uncharacterized protein	SubName: Full=Uncharacterized protein {ECO:0000313|EnsemblPlants:TRIAE_CS42_U_TGACv1_643438_AA2132010.1};
TRINITY_DN78256_c1_g1_i1	tr|M8BXR6|M8BXR6_AEGTA	96	3.1e-26	126.3	95.9	M8BXR6_AEGTA	Putative disease resistance protein RGA4	SubName: Full=Putative disease resistance protein RGA4 {ECO:0000313|EMBL:EMT29760.1, ECO:0000313|EnsemblPlants:EMT29760};
TRINITY_DN78225_c0_g1_i1	tr|A0A1D5RVI2|A0A1D5RVI2_WHEAT	65	9.1e-33	149.4	25.3	A0A1D5RVI2_WHEAT	Uncharacterized protein	SubName: Full=Uncharacterized protein {ECO:0000313|EnsemblPlants:TRIAE_CS42_1AL_TGACv1_001601_AA0032790.1};
TRINITY_DN78274_c0_g1_i5	tr|W5H7R2|W5H7R2_WHEAT	804	0	1491.9	97	W5H7R2_WHEAT	Uncharacterized protein	SubName: Full=Uncharacterized protein {ECO:0000313|EnsemblPlants:TRIAE_CS42_3DS_TGACv1_271475_AA0899750.1};
TRINITY_DN78274_c0_g1_i4	tr|W5H7R2|W5H7R2_WHEAT	861	0	1664	86.3	W5H7R2_WHEAT	Uncharacterized protein	SubName: Full=Uncharacterized protein {ECO:0000313|EnsemblPlants:TRIAE_CS42_3DS_TGACv1_271475_AA0899750.1};
TRINITY_DN78274_c0_g1_i6	tr|W5H7R2|W5H7R2_WHEAT	658	0	1168.3	99.8	W5H7R2_WHEAT	Uncharacterized protein	SubName: Full=Uncharacterized protein {ECO:0000313|EnsemblPlants:TRIAE_CS42_3DS_TGACv1_271475_AA0899750.1};
TRINITY_DN78274_c0_g1_i1	tr|M7ZJG7|M7ZJG7_TRIUA	240	7.6e-134	485.7	66.4	M7ZJG7_TRIUA	Disease resistance protein RPP8	SubName: Full=Disease resistance protein RPP8 {ECO:0000313|EMBL:EMS59781.1, ECO:0000313|EnsemblPlants:TRIUR3_01038-P1};
TRINITY_DN78274_c0_g3_i1	tr|A0A077RUR0|A0A077RUR0_WHEAT	392	3.5e-121	443.7	99.8	A0A077RUR0_WHEAT	Uncharacterized protein	SubName: Full=Uncharacterized protein {ECO:0000313|EMBL:CDM80675.1};
TRINITY_DN78274_c0_g4_i1	tr|A0A287VEV4|A0A287VEV4_HORVV	258	2e-95	358.2	66.6	A0A287VEV4_HORVV	Uncharacterized protein	SubName: Full=Uncharacterized protein {ECO:0000313|EnsemblPlants:HORVU7Hr1G006150.3};
TRINITY_DN78274_c0_g5_i1	tr|M7ZI68|M7ZI68_TRIUA	100	3.5e-44	186	98	M7ZI68_TRIUA	Disease resistance protein RPP8	SubName: Full=Disease resistance protein RPP8 {ECO:0000313|EMBL:EMS59782.1, ECO:0000313|EnsemblPlants:TRIUR3_01039-P1};
TRINITY_DN78274_c0_g2_i2	tr|A0A287VEV4|A0A287VEV4_HORVV	442	2.2e-140	508.1	77.9	A0A287VEV4_HORVV	Uncharacterized protein	SubName: Full=Uncharacterized protein {ECO:0000313|EnsemblPlants:HORVU7Hr1G006150.3};
TRINITY_DN78274_c0_g6_i1	tr|A0A1D6CMT6|A0A1D6CMT6_WHEAT	213	6.7e-85	322.4	98.2	A0A1D6CMT6_WHEAT	Uncharacterized protein	SubName: Full=Uncharacterized protein {ECO:0000313|EnsemblPlants:TRIAE_CS42_7DL_TGACv1_602895_AA1971310.2};
TRINITY_DN78274_c1_g1_i1	tr|A0A1D6ALR9|A0A1D6ALR9_WHEAT	89	4e-24	120.6	38	A0A1D6ALR9_WHEAT	Uncharacterized protein	SubName: Full=Uncharacterized protein {ECO:0000313|EnsemblPlants:TRIAE_CS42_6BL_TGACv1_499660_AA1588460.2};
TRINITY_DN78274_c1_g2_i1	tr|A0A1D6ALR9|A0A1D6ALR9_WHEAT	73	3.5e-17	96.7	56.7	A0A1D6ALR9_WHEAT	Uncharacterized protein	SubName: Full=Uncharacterized protein {ECO:0000313|EnsemblPlants:TRIAE_CS42_6BL_TGACv1_499660_AA1588460.2};
TRINITY_DN78277_c0_g1_i1	tr|A0A1D5THL6|A0A1D5THL6_WHEAT	157	9.4e-88	332	64.6	A0A1D5THL6_WHEAT	Uncharacterized protein	SubName: Full=Uncharacterized protein {ECO:0000313|EnsemblPlants:TRIAE_CS42_2AL_TGACv1_097373_AA0323990.1};
TRINITY_DN78253_c0_g1_i2	tr|B8C8C6|B8C8C6_THAPS	362	7.8e-64	253.4	81.2	B8C8C6_THAPS	Heterotrimeric G protein alpha subunit 1	SubName: Full=Heterotrimeric G protein alpha subunit 1 {ECO:0000313|EMBL:EED90460.1};
TRINITY_DN78253_c0_g1_i1	tr|A0A1X2HJ48|A0A1X2HJ48_SYNRA	137	6.5e-10	72.8	89.5	A0A1X2HJ48_SYNRA	Guanine nucleotide-binding protein subunit alpha	SubName: Full=Guanine nucleotide-binding protein subunit alpha {ECO:0000313|EMBL:ORY99101.1};
TRINITY_DN78253_c0_g1_i3	tr|B8C8C6|B8C8C6_THAPS	362	3.9e-63	251.1	81.2	B8C8C6_THAPS	Heterotrimeric G protein alpha subunit 1	SubName: Full=Heterotrimeric G protein alpha subunit 1 {ECO:0000313|EMBL:EED90460.1};
TRINITY_DN78272_c0_g3_i1	tr|L0P3P1|L0P3P1_9POAL	351	2.3e-133	484.6	71.4	L0P3P1_9POAL	PH01B001I13.4 protein	SubName: Full=PH01B001I13.4 protein {ECO:0000313|EMBL:CCI55308.1};
TRINITY_DN78272_c0_g4_i1	tr|L0P3P1|L0P3P1_9POAL	659	2.7e-145	524.6	97.8	L0P3P1_9POAL	PH01B001I13.4 protein	SubName: Full=PH01B001I13.4 protein {ECO:0000313|EMBL:CCI55308.1};
TRINITY_DN78201_c0_g1_i1	tr|A0A1D6AKB9|A0A1D6AKB9_WHEAT	141	2.8e-76	293.1	99.5	A0A1D6AKB9_WHEAT	Uncharacterized protein	SubName: Full=Uncharacterized protein {ECO:0000313|EnsemblPlants:TRIAE_CS42_6BL_TGACv1_499375_AA1580200.1};
TRINITY_DN78201_c1_g1_i1	tr|A0A1D6AC17|A0A1D6AC17_WHEAT	85	3.2e-38	166	98.8	A0A1D6AC17_WHEAT	Uncharacterized protein	SubName: Full=Uncharacterized protein {ECO:0000313|EnsemblPlants:TRIAE_CS42_6AL_TGACv1_473325_AA1530210.1};
TRINITY_DN78201_c2_g1_i1	tr|A0A287NYN1|A0A287NYN1_HORVV	141	3.7e-68	266.2	99.3	A0A287NYN1_HORVV	Uncharacterized protein	SubName: Full=Uncharacterized protein {ECO:0000313|EnsemblPlants:HORVU4Hr1G048620.6};
TRINITY_DN78204_c0_g1_i1	tr|A0A1D5XYX4|A0A1D5XYX4_WHEAT	98	2.6e-32	147.5	50.3	A0A1D5XYX4_WHEAT	Uncharacterized protein	SubName: Full=Uncharacterized protein {ECO:0000313|EnsemblPlants:TRIAE_CS42_4DL_TGACv1_343043_AA1128290.1};
TRINITY_DN78296_c0_g1_i2	tr|A0A1D5XU27|A0A1D5XU27_WHEAT	337	1.5e-185	657.5	90	A0A1D5XU27_WHEAT	Uncharacterized protein	SubName: Full=Uncharacterized protein {ECO:0000313|EnsemblPlants:TRIAE_CS42_4BS_TGACv1_329499_AA1101980.1};
TRINITY_DN78296_c0_g1_i1	tr|W5DL70|W5DL70_WHEAT	337	1.5e-180	641	90	W5DL70_WHEAT	Uncharacterized protein	SubName: Full=Uncharacterized protein {ECO:0000313|EnsemblPlants:TRIAE_CS42_4AL_TGACv1_288907_AA0961080.1};
TRINITY_DN78297_c0_g1_i1	tr|A0A061R7X6|A0A061R7X6_9CHLO	145	1.7e-21	111.3	90.6	A0A061R7X6_9CHLO	Uncharacterized protein	SubName: Full=Uncharacterized protein {ECO:0000313|EMBL:JAC69037.1}; Flags: Fragment;
TRINITY_DN94448_c0_g1_i2	tr|A0A1D6FC67|A0A1D6FC67_MAIZE	68	8e-08	64.7	98.6	A0A1D6FC67_MAIZE	Glycogen synthase kinase-3 MsK-3	SubName: Full=Glycogen synthase kinase-3 MsK-3 {ECO:0000313|EMBL:AQK89649.1};
TRINITY_DN94448_c0_g1_i1	tr|A0A1D6FC67|A0A1D6FC67_MAIZE	68	8e-08	64.7	98.6	A0A1D6FC67_MAIZE	Glycogen synthase kinase-3 MsK-3	SubName: Full=Glycogen synthase kinase-3 MsK-3 {ECO:0000313|EMBL:AQK89649.1};
TRINITY_DN94436_c0_g1_i1	tr|M8BQC6|M8BQC6_AEGTA	33	0.00021	53.5	41.2	M8BQC6_AEGTA	Golgi apparatus membrane protein TVP23	RecName: Full=Golgi apparatus membrane protein TVP23 {ECO:0000256|RuleBase:RU361206};
TRINITY_DN94493_c0_g1_i1	tr|A0A1D5TCH7|A0A1D5TCH7_WHEAT	32	8.4e-05	56.2	15.6	A0A1D5TCH7_WHEAT	Uncharacterized protein	SubName: Full=Uncharacterized protein {ECO:0000313|EnsemblPlants:TRIAE_CS42_2AL_TGACv1_094671_AA0301280.1};
TRINITY_DN94493_c0_g2_i1	tr|A0A1D5TCH7|A0A1D5TCH7_WHEAT	44	4.6e-05	57	22.9	A0A1D5TCH7_WHEAT	Uncharacterized protein	SubName: Full=Uncharacterized protein {ECO:0000313|EnsemblPlants:TRIAE_CS42_2AL_TGACv1_094671_AA0301280.1};
TRINITY_DN94494_c0_g1_i1	tr|M8BZL9|M8BZL9_AEGTA	81	3e-22	112.8	98.8	M8BZL9_AEGTA	Disease resistance protein RPM1	SubName: Full=Disease resistance protein RPM1 {ECO:0000313|EMBL:EMT08393.1, ECO:0000313|EnsemblPlants:EMT08393};
TRINITY_DN94423_c0_g1_i1	tr|A0A1D6RVB0|A0A1D6RVB0_WHEAT	28	5.9e-06	59.3	22.8	A0A1D6RVB0_WHEAT	Uncharacterized protein	SubName: Full=Uncharacterized protein {ECO:0000313|EnsemblPlants:TRIAE_CS42_4AL_TGACv1_289451_AA0971470.1};
TRINITY_DN94491_c0_g1_i1	tr|M8BVD1|M8BVD1_AEGTA	92	0.0005	52.8	82.4	M8BVD1_AEGTA	Putative PKHD-type hydroxylase	SubName: Full=Putative PKHD-type hydroxylase {ECO:0000313|EMBL:EMT29000.1, ECO:0000313|EnsemblPlants:EMT29000};
TRINITY_DN94411_c0_g1_i1	tr|A0A1D6CPN8|A0A1D6CPN8_WHEAT	41	1.2e-14	87.4	54.2	A0A1D6CPN8_WHEAT	Uncharacterized protein	SubName: Full=Uncharacterized protein {ECO:0000313|EnsemblPlants:TRIAE_CS42_7DL_TGACv1_603311_AA1980680.2};
TRINITY_DN94477_c0_g1_i1	tr|A0A1D5TBU7|A0A1D5TBU7_WHEAT	55	2.1e-23	117.1	51.7	A0A1D5TBU7_WHEAT	Uncharacterized protein	SubName: Full=Uncharacterized protein {ECO:0000313|EnsemblPlants:TRIAE_CS42_2AL_TGACv1_094486_AA0298630.3};
TRINITY_DN94457_c0_g1_i1	tr|A0A1D6C6H7|A0A1D6C6H7_WHEAT	25	0.00027	54.3	14.5	A0A1D6C6H7_WHEAT	Uncharacterized protein	SubName: Full=Uncharacterized protein {ECO:0000313|EnsemblPlants:TRIAE_CS42_7BL_TGACv1_577693_AA1881230.1};
TRINITY_DN94451_c0_g1_i1	tr|A0A1D6S436|A0A1D6S436_WHEAT	145	1e-52	214.5	95.9	A0A1D6S436_WHEAT	Uncharacterized protein	SubName: Full=Uncharacterized protein {ECO:0000313|EnsemblPlants:TRIAE_CS42_5BS_TGACv1_423551_AA1379300.1};
TRINITY_DN94451_c1_g1_i1	tr|A0A1D5ZE33|A0A1D5ZE33_WHEAT	67	4.5e-32	145.2	99.5	A0A1D5ZE33_WHEAT	Uncharacterized protein	SubName: Full=Uncharacterized protein {ECO:0000313|EnsemblPlants:TRIAE_CS42_5BS_TGACv1_423193_AA1370060.1};
TRINITY_DN94440_c0_g1_i1	tr|A0A1D5U994|A0A1D5U994_WHEAT	231	4e-128	466.1	100	A0A1D5U994_WHEAT	Uncharacterized protein	SubName: Full=Uncharacterized protein {ECO:0000313|EnsemblPlants:TRIAE_CS42_2BS_TGACv1_146315_AA0462390.3};
TRINITY_DN94412_c0_g1_i1	tr|A0A287HKZ3|A0A287HKZ3_HORVV	26	2.1e-05	57.8	17.3	A0A287HKZ3_HORVV	Uncharacterized protein	SubName: Full=Uncharacterized protein {ECO:0000313|EnsemblPlants:HORVU2Hr1G031470.12};
TRINITY_DN94480_c0_g1_i1	tr|A0A1D5Y872|A0A1D5Y872_WHEAT	44	1e-14	87.8	53.4	A0A1D5Y872_WHEAT	Uncharacterized protein	SubName: Full=Uncharacterized protein {ECO:0000313|EnsemblPlants:TRIAE_CS42_4DS_TGACv1_361864_AA1173690.1};
TRINITY_DN94466_c1_g3_i1	tr|A0A1D5VB46|A0A1D5VB46_WHEAT	43	3.8e-12	79.7	39	A0A1D5VB46_WHEAT	Uncharacterized protein	SubName: Full=Uncharacterized protein {ECO:0000313|EnsemblPlants:TRIAE_CS42_3AL_TGACv1_195250_AA0646950.2};
TRINITY_DN94408_c0_g1_i1	tr|A0A0Q3GGQ1|A0A0Q3GGQ1_BRADI	93	7.6e-05	55.5	71.3	A0A0Q3GGQ1_BRADI	Uncharacterized protein	SubName: Full=Uncharacterized protein {ECO:0000313|EMBL:KQK10247.1}; Flags: Fragment;
TRINITY_DN94497_c0_g1_i1	tr|R7WG90|R7WG90_AEGTA	191	1.3e-105	391	99.7	R7WG90_AEGTA	3-ketoacyl-CoA synthase	RecName: Full=3-ketoacyl-CoA synthase {ECO:0000256|PIRNR:PIRNR036417}; EC=2.3.1.- {ECO:0000256|PIRNR:PIRNR036417};
TRINITY_DN94472_c0_g1_i1	tr|A0A1D6SB57|A0A1D6SB57_WHEAT	101	1.1e-45	191	99.3	A0A1D6SB57_WHEAT	Uncharacterized protein	SubName: Full=Uncharacterized protein {ECO:0000313|EnsemblPlants:TRIAE_CS42_6DL_TGACv1_526803_AA1692340.1};
TRINITY_DN94419_c0_g1_i1	tr|A0A0H5R4N8|A0A0H5R4N8_9EUKA	136	4.9e-53	216.1	85.4	A0A0H5R4N8_9EUKA	Uncharacterized protein	SubName: Full=Uncharacterized protein {ECO:0000313|EMBL:CRZ08856.1}; Flags: Fragment;
TRINITY_DN94481_c0_g1_i1	tr|Q2I5T7|Q2I5T7_9FUNG	207	1.3e-69	271.6	98.3	Q2I5T7_9FUNG	DNA-directed RNA polymerase subunit beta	RecName: Full=DNA-directed RNA polymerase subunit beta {ECO:0000256|RuleBase:RU363031}; EC=2.7.7.6 {ECO:0000256|RuleBase:RU363031}; Flags: Fragment;
TRINITY_DN94481_c0_g2_i1	tr|F0YGN2|F0YGN2_AURAN	132	1e-50	208.4	83.2	F0YGN2_AURAN	DNA-directed RNA polymerase subunit beta	RecName: Full=DNA-directed RNA polymerase subunit beta {ECO:0000256|RuleBase:RU363031}; EC=2.7.7.6 {ECO:0000256|RuleBase:RU363031};
TRINITY_DN94402_c0_g1_i3	tr|A0A0M0JWJ2|A0A0M0JWJ2_9EUKA	121	1.4e-16	95.1	68	A0A0M0JWJ2_9EUKA	Uncharacterized protein	SubName: Full=Uncharacterized protein {ECO:0000313|EMBL:KOO30493.1};
TRINITY_DN94402_c0_g1_i2	tr|A0A0M0JH90|A0A0M0JH90_9EUKA	282	6e-61	243.4	83.4	A0A0M0JH90_9EUKA	Uncharacterized protein	SubName: Full=Uncharacterized protein {ECO:0000313|EMBL:KOO25845.1};
TRINITY_DN94402_c0_g1_i1	tr|A0A096P8B8|A0A096P8B8_OSTTA	101	2.3e-17	97.1	90.4	A0A096P8B8_OSTTA	Peptidase C2, calpain family	SubName: Full=Peptidase C2, calpain family {ECO:0000313|EMBL:CEG00154.1};
TRINITY_DN94416_c0_g1_i1	tr|A0A287PLR3|A0A287PLR3_HORVV	71	1.1e-09	70.9	99.5	A0A287PLR3_HORVV	Predicted protein	SubName: Full=Predicted protein {ECO:0000313|EnsemblPlants:HORVU4Hr1G071250.27};
TRINITY_DN94442_c1_g1_i1	tr|A0A1D5V9K5|A0A1D5V9K5_WHEAT	66	5.3e-33	148.3	98	A0A1D5V9K5_WHEAT	Pectin acetylesterase	RecName: Full=Pectin acetylesterase {ECO:0000256|RuleBase:RU363114}; EC=3.1.1.- {ECO:0000256|RuleBase:RU363114};
TRINITY_DN94452_c0_g1_i1	tr|A0A1D5X2R0|A0A1D5X2R0_WHEAT	122	6.2e-64	251.9	99.5	A0A1D5X2R0_WHEAT	Uncharacterized protein	SubName: Full=Uncharacterized protein {ECO:0000313|EnsemblPlants:TRIAE_CS42_4AL_TGACv1_289144_AA0965950.1};
TRINITY_DN94465_c0_g1_i2	tr|M7YV08|M7YV08_TRIUA	57	7.6e-20	104.8	75	M7YV08_TRIUA	Putative GTP-binding protein EngB	SubName: Full=Putative GTP-binding protein EngB {ECO:0000313|EMBL:EMS51412.1, ECO:0000313|EnsemblPlants:TRIUR3_24495-P1};
TRINITY_DN94465_c0_g1_i1	tr|M7YV08|M7YV08_TRIUA	57	1.5e-19	104.4	50.3	M7YV08_TRIUA	Putative GTP-binding protein EngB	SubName: Full=Putative GTP-binding protein EngB {ECO:0000313|EMBL:EMS51412.1, ECO:0000313|EnsemblPlants:TRIUR3_24495-P1};
TRINITY_DN94443_c0_g1_i3	tr|A0A1E5V5U6|A0A1E5V5U6_9POAL	28	0.00068	52	31.8	A0A1E5V5U6_9POAL	Paired amphipathic helix protein Sin3-like 4	SubName: Full=Paired amphipathic helix protein Sin3-like 4 {ECO:0000313|EMBL:OEL20447.1}; Flags: Fragment;
TRINITY_DN94488_c0_g1_i1	tr|A0A287JXK9|A0A287JXK9_HORVV	47	2.3e-05	56.6	63.5	A0A287JXK9_HORVV	Uncharacterized protein	SubName: Full=Uncharacterized protein {ECO:0000313|EnsemblPlants:HORVU3Hr1G002530.9};
TRINITY_DN94459_c0_g1_i1	tr|R7WE49|R7WE49_AEGTA	123	3e-45	190.7	58	R7WE49_AEGTA	Putative LRR receptor-like serine/threonine-protein kinase	SubName: Full=Putative LRR receptor-like serine/threonine-protein kinase {ECO:0000313|EMBL:EMT18485.1, ECO:0000313|EnsemblPlants:EMT18485};
TRINITY_DN94417_c0_g1_i1	tr|A0A1D5V0C4|A0A1D5V0C4_WHEAT	78	9.9e-35	154.8	66.7	A0A1D5V0C4_WHEAT	Uncharacterized protein	SubName: Full=Uncharacterized protein {ECO:0000313|EnsemblPlants:TRIAE_CS42_2DS_TGACv1_178385_AA0594820.1};
TRINITY_DN94487_c0_g1_i1	tr|A0A1D6S5S8|A0A1D6S5S8_WHEAT	260	7.6e-148	532.3	66.4	A0A1D6S5S8_WHEAT	Uncharacterized protein	SubName: Full=Uncharacterized protein {ECO:0000313|EnsemblPlants:TRIAE_CS42_5DL_TGACv1_433389_AA1411750.1};
TRINITY_DN94487_c0_g1_i7	tr|A0A1D6S5S8|A0A1D6S5S8_WHEAT	246	2.6e-138	501.5	35.5	A0A1D6S5S8_WHEAT	Uncharacterized protein	SubName: Full=Uncharacterized protein {ECO:0000313|EnsemblPlants:TRIAE_CS42_5DL_TGACv1_433389_AA1411750.1};
TRINITY_DN94487_c0_g1_i8	tr|A0A1D6S5S8|A0A1D6S5S8_WHEAT	248	3.2e-139	503.8	57.9	A0A1D6S5S8_WHEAT	Uncharacterized protein	SubName: Full=Uncharacterized protein {ECO:0000313|EnsemblPlants:TRIAE_CS42_5DL_TGACv1_433389_AA1411750.1};
TRINITY_DN94487_c0_g1_i15	tr|A0A1D6S5S8|A0A1D6S5S8_WHEAT	292	3.9e-166	594	41.2	A0A1D6S5S8_WHEAT	Uncharacterized protein	SubName: Full=Uncharacterized protein {ECO:0000313|EnsemblPlants:TRIAE_CS42_5DL_TGACv1_433389_AA1411750.1};
TRINITY_DN94487_c0_g1_i5	tr|A0A1D6S5S8|A0A1D6S5S8_WHEAT	301	1e-172	615.9	38.8	A0A1D6S5S8_WHEAT	Uncharacterized protein	SubName: Full=Uncharacterized protein {ECO:0000313|EnsemblPlants:TRIAE_CS42_5DL_TGACv1_433389_AA1411750.1};
TRINITY_DN94487_c0_g1_i14	tr|A0A1D6S5S8|A0A1D6S5S8_WHEAT	246	1.1e-138	501.9	63	A0A1D6S5S8_WHEAT	Uncharacterized protein	SubName: Full=Uncharacterized protein {ECO:0000313|EnsemblPlants:TRIAE_CS42_5DL_TGACv1_433389_AA1411750.1};
TRINITY_DN94487_c0_g1_i2	tr|A0A1D6S5S8|A0A1D6S5S8_WHEAT	292	1.7e-166	594.3	71.7	A0A1D6S5S8_WHEAT	Uncharacterized protein	SubName: Full=Uncharacterized protein {ECO:0000313|EnsemblPlants:TRIAE_CS42_5DL_TGACv1_433389_AA1411750.1};
TRINITY_DN94487_c0_g1_i11	tr|A0A1D6S5S8|A0A1D6S5S8_WHEAT	248	7.1e-139	503.4	34	A0A1D6S5S8_WHEAT	Uncharacterized protein	SubName: Full=Uncharacterized protein {ECO:0000313|EnsemblPlants:TRIAE_CS42_5DL_TGACv1_433389_AA1411750.1};
TRINITY_DN94487_c0_g1_i10	tr|A0A1D6S5S8|A0A1D6S5S8_WHEAT	315	3.4e-182	646.7	66.3	A0A1D6S5S8_WHEAT	Uncharacterized protein	SubName: Full=Uncharacterized protein {ECO:0000313|EnsemblPlants:TRIAE_CS42_5DL_TGACv1_433389_AA1411750.1};
TRINITY_DN94487_c0_g1_i3	tr|A0A1D6S5S8|A0A1D6S5S8_WHEAT	301	4.9e-173	616.3	63.5	A0A1D6S5S8_WHEAT	Uncharacterized protein	SubName: Full=Uncharacterized protein {ECO:0000313|EnsemblPlants:TRIAE_CS42_5DL_TGACv1_433389_AA1411750.1};
TRINITY_DN94487_c0_g1_i9	tr|A0A1D6S5S8|A0A1D6S5S8_WHEAT	195	1.5e-113	418.3	53.7	A0A1D6S5S8_WHEAT	Uncharacterized protein	SubName: Full=Uncharacterized protein {ECO:0000313|EnsemblPlants:TRIAE_CS42_5DL_TGACv1_433389_AA1411750.1};
TRINITY_DN94447_c0_g1_i1	tr|D8LTT3|D8LTT3_ECTSI	156	1.8e-39	171.4	73.6	D8LTT3_ECTSI	Eukaryotic translation initiation factor 4E-like 1	SubName: Full=Eukaryotic translation initiation factor 4E-like 1 {ECO:0000313|EMBL:CBN73980.1};
TRINITY_DN94421_c0_g1_i2	tr|M7YI40|M7YI40_TRIUA	83	2.1e-31	143.3	98	M7YI40_TRIUA	Homeobox-leucine zipper protein HOX6	SubName: Full=Homeobox-leucine zipper protein HOX6 {ECO:0000313|EMBL:EMS46461.1, ECO:0000313|EnsemblPlants:TRIUR3_11780-P1};
TRINITY_DN94421_c0_g1_i1	tr|M7YI40|M7YI40_TRIUA	58	1.3e-20	107.5	69.9	M7YI40_TRIUA	Homeobox-leucine zipper protein HOX6	SubName: Full=Homeobox-leucine zipper protein HOX6 {ECO:0000313|EMBL:EMS46461.1, ECO:0000313|EnsemblPlants:TRIUR3_11780-P1};
TRINITY_DN94421_c0_g1_i3	tr|M7YI40|M7YI40_TRIUA	62	2.9e-23	116.3	70.5	M7YI40_TRIUA	Homeobox-leucine zipper protein HOX6	SubName: Full=Homeobox-leucine zipper protein HOX6 {ECO:0000313|EMBL:EMS46461.1, ECO:0000313|EnsemblPlants:TRIUR3_11780-P1};
TRINITY_DN94473_c0_g1_i1	tr|A0A1D5YPC8|A0A1D5YPC8_WHEAT	127	4.3e-46	193	83.4	A0A1D5YPC8_WHEAT	Uncharacterized protein	SubName: Full=Uncharacterized protein {ECO:0000313|EnsemblPlants:TRIAE_CS42_5AL_TGACv1_377247_AA1245350.1};
TRINITY_DN94473_c0_g2_i1	tr|M8CFS5|M8CFS5_AEGTA	118	8.8e-48	198.7	68.7	M8CFS5_AEGTA	Uncharacterized protein	SubName: Full=Uncharacterized protein {ECO:0000313|EMBL:EMT33078.1, ECO:0000313|EnsemblPlants:EMT33078};
TRINITY_DN94478_c0_g1_i1	tr|W4ZR35|W4ZR35_WHEAT	170	1.2e-86	327.8	99.4	W4ZR35_WHEAT	Uncharacterized protein	SubName: Full=Uncharacterized protein {ECO:0000313|EnsemblPlants:TRIAE_CS42_1AL_TGACv1_002511_AA0042600.1};
TRINITY_DN94478_c1_g1_i1	tr|A0A1D5VTE3|A0A1D5VTE3_WHEAT	79	2.1e-36	159.8	99.6	A0A1D5VTE3_WHEAT	ATP-dependent DNA helicase	RecName: Full=ATP-dependent DNA helicase {ECO:0000256|RuleBase:RU363044}; EC=3.6.4.12 {ECO:0000256|RuleBase:RU363044};
TRINITY_DN94418_c0_g1_i1	tr|A0A1D5RP16|A0A1D5RP16_WHEAT	79	1.9e-29	136.7	99.6	A0A1D5RP16_WHEAT	Uncharacterized protein	SubName: Full=Uncharacterized protein {ECO:0000313|EnsemblPlants:TRIAE_CS42_1AL_TGACv1_000024_AA0000750.1};
TRINITY_DN94418_c0_g1_i2	tr|A0A1D5RP16|A0A1D5RP16_WHEAT	77	4.5e-23	115.5	97.1	A0A1D5RP16_WHEAT	Uncharacterized protein	SubName: Full=Uncharacterized protein {ECO:0000313|EnsemblPlants:TRIAE_CS42_1AL_TGACv1_000024_AA0000750.1};
TRINITY_DN94474_c0_g1_i1	tr|F2DXS8|F2DXS8_HORVV	32	4.1e-05	56.2	32.3	F2DXS8_HORVV	Predicted protein	SubName: Full=Predicted protein {ECO:0000313|EMBL:BAJ99899.1};
TRINITY_DN94474_c0_g1_i2	tr|A0A1D5WMP1|A0A1D5WMP1_WHEAT	32	3.9e-08	66.2	32.3	A0A1D5WMP1_WHEAT	Uncharacterized protein	SubName: Full=Uncharacterized protein {ECO:0000313|EnsemblPlants:TRIAE_CS42_3DL_TGACv1_251793_AA0884990.1};
TRINITY_DN94498_c0_g1_i1	tr|A0A1D5UDT4|A0A1D5UDT4_WHEAT	32	1.7e-06	60.8	31.5	A0A1D5UDT4_WHEAT	Uncharacterized protein	SubName: Full=Uncharacterized protein {ECO:0000313|EnsemblPlants:TRIAE_CS42_2BS_TGACv1_147655_AA0486000.1};
TRINITY_DN94467_c0_g1_i1	tr|A0A1D6S5K9|A0A1D6S5K9_WHEAT	39	5.2e-15	90.9	11.4	A0A1D6S5K9_WHEAT	Uncharacterized protein	SubName: Full=Uncharacterized protein {ECO:0000313|EnsemblPlants:TRIAE_CS42_5DL_TGACv1_433366_AA1410990.5};
TRINITY_DN94467_c0_g1_i2	tr|A0A1D6S5K9|A0A1D6S5K9_WHEAT	39	5.2e-15	90.9	11.3	A0A1D6S5K9_WHEAT	Uncharacterized protein	SubName: Full=Uncharacterized protein {ECO:0000313|EnsemblPlants:TRIAE_CS42_5DL_TGACv1_433366_AA1410990.5};
TRINITY_DN94405_c0_g1_i1	tr|A0A1D6CQL6|A0A1D6CQL6_WHEAT	62	6.1e-27	129	50.3	A0A1D6CQL6_WHEAT	Uncharacterized protein	SubName: Full=Uncharacterized protein {ECO:0000313|EnsemblPlants:TRIAE_CS42_7DL_TGACv1_603536_AA1985420.1};
TRINITY_DN94405_c0_g1_i2	tr|A0A1D6CQL6|A0A1D6CQL6_WHEAT	62	3.3e-28	133.7	37.7	A0A1D6CQL6_WHEAT	Uncharacterized protein	SubName: Full=Uncharacterized protein {ECO:0000313|EnsemblPlants:TRIAE_CS42_7DL_TGACv1_603536_AA1985420.1};
TRINITY_DN94405_c0_g1_i4	tr|A0A1D6CQL6|A0A1D6CQL6_WHEAT	62	8.2e-27	129	37.5	A0A1D6CQL6_WHEAT	Uncharacterized protein	SubName: Full=Uncharacterized protein {ECO:0000313|EnsemblPlants:TRIAE_CS42_7DL_TGACv1_603536_AA1985420.1};
TRINITY_DN94405_c0_g1_i5	tr|A0A1D6CQL6|A0A1D6CQL6_WHEAT	62	8.2e-27	129	37.5	A0A1D6CQL6_WHEAT	Uncharacterized protein	SubName: Full=Uncharacterized protein {ECO:0000313|EnsemblPlants:TRIAE_CS42_7DL_TGACv1_603536_AA1985420.1};
TRINITY_DN94405_c0_g1_i3	tr|A0A1D6CQL6|A0A1D6CQL6_WHEAT	62	3.7e-27	130.2	37.7	A0A1D6CQL6_WHEAT	Uncharacterized protein	SubName: Full=Uncharacterized protein {ECO:0000313|EnsemblPlants:TRIAE_CS42_7DL_TGACv1_603536_AA1985420.1};
TRINITY_DN94446_c1_g1_i1	tr|M7ZNL0|M7ZNL0_TRIUA	48	0.00065	53.1	21.5	M7ZNL0_TRIUA	Phosphatidylinositol 4-phosphate 5-kinase	RecName: Full=Phosphatidylinositol 4-phosphate 5-kinase {ECO:0000256|PIRNR:PIRNR037274}; EC=2.7.1.68 {ECO:0000256|PIRNR:PIRNR037274};
TRINITY_DN94409_c0_g1_i2	tr|A0A0V0YUW3|A0A0V0YUW3_9BILA	50	1.2e-08	68.2	43.9	A0A0V0YUW3_9BILA	Uncharacterized protein	SubName: Full=Uncharacterized protein {ECO:0000313|EMBL:KRY04121.1};
TRINITY_DN94409_c0_g1_i1	tr|A0A0V0YUW3|A0A0V0YUW3_9BILA	105	1.4e-06	61.2	97.5	A0A0V0YUW3_9BILA	Uncharacterized protein	SubName: Full=Uncharacterized protein {ECO:0000313|EMBL:KRY04121.1};
TRINITY_DN94437_c0_g1_i1	tr|A0A1D6DA37|A0A1D6DA37_WHEAT	76	2.1e-39	170.6	54.7	A0A1D6DA37_WHEAT	Uncharacterized protein	SubName: Full=Uncharacterized protein {ECO:0000313|EnsemblPlants:TRIAE_CS42_U_TGACv1_641213_AA2088460.1};
TRINITY_DN94413_c0_g1_i9	tr|F2DP23|F2DP23_HORVV	163	3.7e-33	151	52.7	F2DP23_HORVV	Predicted protein	SubName: Full=Predicted protein {ECO:0000313|EMBL:BAJ96844.1};
TRINITY_DN94413_c0_g1_i5	tr|F2DP23|F2DP23_HORVV	141	8e-36	160.2	35	F2DP23_HORVV	Predicted protein	SubName: Full=Predicted protein {ECO:0000313|EMBL:BAJ96844.1};
TRINITY_DN94413_c0_g1_i4	tr|F2DP23|F2DP23_HORVV	141	5.3e-36	160.2	52.4	F2DP23_HORVV	Predicted protein	SubName: Full=Predicted protein {ECO:0000313|EMBL:BAJ96844.1};
TRINITY_DN94413_c0_g1_i10	tr|M7Z332|M7Z332_TRIUA	30	9.2e-07	61.6	31.8	M7Z332_TRIUA	Uncharacterized protein	SubName: Full=Uncharacterized protein {ECO:0000313|EMBL:EMS53901.1, ECO:0000313|EnsemblPlants:TRIUR3_32912-P1};
TRINITY_DN94413_c0_g1_i2	tr|M7Z332|M7Z332_TRIUA	30	7.3e-07	61.6	39.8	M7Z332_TRIUA	Uncharacterized protein	SubName: Full=Uncharacterized protein {ECO:0000313|EMBL:EMS53901.1, ECO:0000313|EnsemblPlants:TRIUR3_32912-P1};
TRINITY_DN94413_c0_g1_i3	tr|F2DP23|F2DP23_HORVV	151	2.1e-40	174.9	57.3	F2DP23_HORVV	Predicted protein	SubName: Full=Predicted protein {ECO:0000313|EMBL:BAJ96844.1};
TRINITY_DN94413_c0_g1_i7	tr|F2DP23|F2DP23_HORVV	141	5.7e-36	160.2	48.9	F2DP23_HORVV	Predicted protein	SubName: Full=Predicted protein {ECO:0000313|EMBL:BAJ96844.1};
TRINITY_DN94413_c0_g1_i6	tr|F2DP23|F2DP23_HORVV	141	7.1e-36	160.2	39.3	F2DP23_HORVV	Predicted protein	SubName: Full=Predicted protein {ECO:0000313|EMBL:BAJ96844.1};
TRINITY_DN94479_c0_g1_i1	tr|T1M3Q4|T1M3Q4_TRIUA	51	1.8e-11	77.8	37.5	T1M3Q4_TRIUA	Uncharacterized protein	SubName: Full=Uncharacterized protein {ECO:0000313|EnsemblPlants:TRIUR3_12098-P1};
TRINITY_DN94482_c0_g1_i1	tr|A0A1D5XCS4|A0A1D5XCS4_WHEAT	35	8.2e-10	71.6	40.1	A0A1D5XCS4_WHEAT	Uncharacterized protein	SubName: Full=Uncharacterized protein {ECO:0000313|EnsemblPlants:TRIAE_CS42_4AS_TGACv1_307404_AA1020130.1};
TRINITY_DN94475_c0_g1_i1	tr|A0A1D6CLP4|A0A1D6CLP4_WHEAT	84	3e-41	176	99.6	A0A1D6CLP4_WHEAT	Uncharacterized protein	SubName: Full=Uncharacterized protein {ECO:0000313|EnsemblPlants:TRIAE_CS42_7DL_TGACv1_602706_AA1965950.1};
TRINITY_DN94495_c0_g1_i1	tr|M7Z366|M7Z366_TRIUA	99	4.1e-25	123.6	50.1	M7Z366_TRIUA	Ketohexokinase	SubName: Full=Ketohexokinase {ECO:0000313|EMBL:EMS54402.1, ECO:0000313|EnsemblPlants:TRIUR3_11649-P1};
TRINITY_DN94495_c0_g2_i1	tr|A0A077RSV9|A0A077RSV9_WHEAT	382	1.4e-229	803.9	94.9	A0A077RSV9_WHEAT	Uncharacterized protein	SubName: Full=Uncharacterized protein {ECO:0000313|EMBL:CDM83556.1, ECO:0000313|EnsemblPlants:TRIAE_CS42_3B_TGACv1_223837_AA0788230.1};
TRINITY_DN94495_c0_g2_i4	tr|A0A077RSV9|A0A077RSV9_WHEAT	388	9.4e-233	814.7	81	A0A077RSV9_WHEAT	Uncharacterized protein	SubName: Full=Uncharacterized protein {ECO:0000313|EMBL:CDM83556.1, ECO:0000313|EnsemblPlants:TRIAE_CS42_3B_TGACv1_223837_AA0788230.1};
TRINITY_DN94495_c0_g2_i3	tr|A0A077RSV9|A0A077RSV9_WHEAT	388	9.3e-233	814.7	82.5	A0A077RSV9_WHEAT	Uncharacterized protein	SubName: Full=Uncharacterized protein {ECO:0000313|EMBL:CDM83556.1, ECO:0000313|EnsemblPlants:TRIAE_CS42_3B_TGACv1_223837_AA0788230.1};
TRINITY_DN94495_c0_g2_i2	tr|A0A077RSV9|A0A077RSV9_WHEAT	388	9.4e-233	814.7	81.6	A0A077RSV9_WHEAT	Uncharacterized protein	SubName: Full=Uncharacterized protein {ECO:0000313|EMBL:CDM83556.1, ECO:0000313|EnsemblPlants:TRIAE_CS42_3B_TGACv1_223837_AA0788230.1};
TRINITY_DN94495_c1_g1_i1	tr|A0A1D5UAJ8|A0A1D5UAJ8_WHEAT	91	1e-34	154.5	96.5	A0A1D5UAJ8_WHEAT	Uncharacterized protein	SubName: Full=Uncharacterized protein {ECO:0000313|EnsemblPlants:TRIAE_CS42_2BS_TGACv1_146633_AA0469740.3};
TRINITY_DN85840_c0_g1_i1	tr|A0A1D5T171|A0A1D5T171_WHEAT	280	1e-146	528.5	78.9	A0A1D5T171_WHEAT	Uncharacterized protein	SubName: Full=Uncharacterized protein {ECO:0000313|EnsemblPlants:TRIAE_CS42_1DS_TGACv1_080118_AA0240140.1};
TRINITY_DN85885_c0_g1_i2	tr|I1GXW3|I1GXW3_BRADI	210	3.5e-53	218.4	37.8	I1GXW3_BRADI	Uncharacterized protein	SubName: Full=Uncharacterized protein {ECO:0000313|EnsemblPlants:BRADI1G37640.1};
TRINITY_DN85885_c0_g1_i4	tr|I1GXW3|I1GXW3_BRADI	273	1.6e-59	239.6	44	I1GXW3_BRADI	Uncharacterized protein	SubName: Full=Uncharacterized protein {ECO:0000313|EnsemblPlants:BRADI1G37640.1};
TRINITY_DN85885_c0_g1_i6	tr|I1GXW3|I1GXW3_BRADI	223	2.1e-57	232.3	43.5	I1GXW3_BRADI	Uncharacterized protein	SubName: Full=Uncharacterized protein {ECO:0000313|EnsemblPlants:BRADI1G37640.1};
TRINITY_DN85849_c0_g1_i1	tr|A0A160NXT4|A0A160NXT4_STRLU	66	2.7e-15	90.1	62.5	A0A160NXT4_STRLU	Uncharacterized protein	SubName: Full=Uncharacterized protein {ECO:0000313|EMBL:BAU83659.1};
TRINITY_DN85849_c0_g1_i2	tr|A0A160NXT4|A0A160NXT4_STRLU	66	3.1e-15	90.1	54.2	A0A160NXT4_STRLU	Uncharacterized protein	SubName: Full=Uncharacterized protein {ECO:0000313|EMBL:BAU83659.1};
TRINITY_DN85849_c0_g2_i1	tr|E0XU43|E0XU43_9DELT	48	4.5e-08	66.2	42	E0XU43_9DELT	Uncharacterized protein	SubName: Full=Uncharacterized protein {ECO:0000313|EMBL:ADI17934.1};
TRINITY_DN85849_c0_g2_i2	tr|E0XU43|E0XU43_9DELT	50	9.1e-09	68.6	43.6	E0XU43_9DELT	Uncharacterized protein	SubName: Full=Uncharacterized protein {ECO:0000313|EMBL:ADI17934.1};
TRINITY_DN85818_c0_g1_i3	tr|A0A1D6D5P6|A0A1D6D5P6_WHEAT	108	2.6e-36	161	48.1	A0A1D6D5P6_WHEAT	Uncharacterized protein	SubName: Full=Uncharacterized protein {ECO:0000313|EnsemblPlants:TRIAE_CS42_7DS_TGACv1_624889_AA2063760.3};
TRINITY_DN85818_c0_g1_i1	tr|A0A1D6D5P6|A0A1D6D5P6_WHEAT	108	2.1e-36	161	60.3	A0A1D6D5P6_WHEAT	Uncharacterized protein	SubName: Full=Uncharacterized protein {ECO:0000313|EnsemblPlants:TRIAE_CS42_7DS_TGACv1_624889_AA2063760.3};
TRINITY_DN85818_c0_g2_i3	tr|A0A1D5Y3N7|A0A1D5Y3N7_WHEAT	81	4.5e-41	176.8	37.6	A0A1D5Y3N7_WHEAT	Malate dehydrogenase	RecName: Full=Malate dehydrogenase {ECO:0000256|RuleBase:RU003405}; EC=1.1.1.37 {ECO:0000256|RuleBase:RU003405};
TRINITY_DN85818_c0_g2_i1	tr|A0A1D5Y3N7|A0A1D5Y3N7_WHEAT	113	7.9e-58	232.3	59.8	A0A1D5Y3N7_WHEAT	Malate dehydrogenase	RecName: Full=Malate dehydrogenase {ECO:0000256|RuleBase:RU003405}; EC=1.1.1.37 {ECO:0000256|RuleBase:RU003405};
TRINITY_DN85830_c0_g1_i1	tr|M8CAY0|M8CAY0_AEGTA	32	3.3e-09	70.5	20.2	M8CAY0_AEGTA	Uncharacterized protein	SubName: Full=Uncharacterized protein {ECO:0000313|EMBL:EMT24242.1, ECO:0000313|EnsemblPlants:EMT24242};
TRINITY_DN85830_c0_g1_i2	tr|M8CAY0|M8CAY0_AEGTA	32	2.1e-10	74.7	16.9	M8CAY0_AEGTA	Uncharacterized protein	SubName: Full=Uncharacterized protein {ECO:0000313|EMBL:EMT24242.1, ECO:0000313|EnsemblPlants:EMT24242};
TRINITY_DN85844_c0_g1_i1	tr|R7W0W2|R7W0W2_AEGTA	85	2.5e-42	180.3	63.4	R7W0W2_AEGTA	Acyl-CoA synthetase family member 4	SubName: Full=Acyl-CoA synthetase family member 4 {ECO:0000313|EMBL:EMT03524.1, ECO:0000313|EnsemblPlants:EMT03524};
TRINITY_DN85844_c0_g1_i10	tr|A0A1D6BW45|A0A1D6BW45_WHEAT	75	5e-38	166	55.4	A0A1D6BW45_WHEAT	Uncharacterized protein	SubName: Full=Uncharacterized protein {ECO:0000313|EnsemblPlants:TRIAE_CS42_7AS_TGACv1_569907_AA1826790.1};
TRINITY_DN85844_c0_g1_i2	tr|M8CPJ4|M8CPJ4_AEGTA	80	6e-41	175.6	62	M8CPJ4_AEGTA	Acyl-CoA synthetase family member 4	SubName: Full=Acyl-CoA synthetase family member 4 {ECO:0000313|EMBL:EMT29437.1, ECO:0000313|EnsemblPlants:EMT29437};
TRINITY_DN85844_c0_g1_i6	tr|M8CPJ4|M8CPJ4_AEGTA	88	1.2e-43	184.1	98.9	M8CPJ4_AEGTA	Acyl-CoA synthetase family member 4	SubName: Full=Acyl-CoA synthetase family member 4 {ECO:0000313|EMBL:EMT29437.1, ECO:0000313|EnsemblPlants:EMT29437};
TRINITY_DN85844_c0_g1_i9	tr|A0A1D5WN72|A0A1D5WN72_WHEAT	129	2.3e-65	257.3	67.1	A0A1D5WN72_WHEAT	Uncharacterized protein	SubName: Full=Uncharacterized protein {ECO:0000313|EnsemblPlants:TRIAE_CS42_3DL_TGACv1_252047_AA0887270.5};
TRINITY_DN85844_c0_g1_i4	tr|M7ZVF9|M7ZVF9_TRIUA	83	1.2e-41	177.9	62.9	M7ZVF9_TRIUA	Acyl-CoA synthetase family member 4	SubName: Full=Acyl-CoA synthetase family member 4 {ECO:0000313|EMBL:EMS56380.1, ECO:0000313|EnsemblPlants:TRIUR3_25058-P1};
TRINITY_DN85844_c0_g1_i3	tr|M7ZVF9|M7ZVF9_TRIUA	102	1.3e-46	194.1	100	M7ZVF9_TRIUA	Acyl-CoA synthetase family member 4	SubName: Full=Acyl-CoA synthetase family member 4 {ECO:0000313|EMBL:EMS56380.1, ECO:0000313|EnsemblPlants:TRIUR3_25058-P1};
TRINITY_DN85844_c0_g1_i7	tr|A0A1D5WN72|A0A1D5WN72_WHEAT	126	8.1e-71	275.4	66.5	A0A1D5WN72_WHEAT	Uncharacterized protein	SubName: Full=Uncharacterized protein {ECO:0000313|EnsemblPlants:TRIAE_CS42_3DL_TGACv1_252047_AA0887270.5};
TRINITY_DN85844_c0_g2_i1	tr|R7W0W2|R7W0W2_AEGTA	71	2.8e-30	139.4	93	R7W0W2_AEGTA	Acyl-CoA synthetase family member 4	SubName: Full=Acyl-CoA synthetase family member 4 {ECO:0000313|EMBL:EMT03524.1, ECO:0000313|EnsemblPlants:EMT03524};
TRINITY_DN85804_c0_g1_i1	tr|A0A1D5YS26|A0A1D5YS26_WHEAT	44	4.4e-19	102.1	65.7	A0A1D5YS26_WHEAT	Uncharacterized protein	SubName: Full=Uncharacterized protein {ECO:0000313|EnsemblPlants:TRIAE_CS42_5AS_TGACv1_392552_AA1260700.3};
TRINITY_DN85861_c0_g1_i1	tr|A0A1D6BR49|A0A1D6BR49_WHEAT	224	5.6e-75	289.7	84.3	A0A1D6BR49_WHEAT	Uncharacterized protein	SubName: Full=Uncharacterized protein {ECO:0000313|EnsemblPlants:TRIAE_CS42_7AL_TGACv1_559076_AA1797970.1};
TRINITY_DN85888_c0_g1_i1	tr|M0VMA8|M0VMA8_HORVV	33	9.3e-07	63.2	11.9	M0VMA8_HORVV	Predicted protein	SubName: Full=Predicted protein {ECO:0000313|EnsemblPlants:HORVU5Hr1G055890.10};
TRINITY_DN85888_c0_g1_i3	tr|Q8LMY0|Q8LMY0_ORYSJ	217	9e-28	133.7	43.7	Q8LMY0_ORYSJ	ATP-dependent DNA helicase	RecName: Full=ATP-dependent DNA helicase {ECO:0000256|RuleBase:RU363044}; EC=3.6.4.12 {ECO:0000256|RuleBase:RU363044}; Flags: Fragment;
TRINITY_DN85888_c0_g1_i2	tr|Q8LMY0|Q8LMY0_ORYSJ	268	7.4e-33	151	40.1	Q8LMY0_ORYSJ	ATP-dependent DNA helicase	RecName: Full=ATP-dependent DNA helicase {ECO:0000256|RuleBase:RU363044}; EC=3.6.4.12 {ECO:0000256|RuleBase:RU363044}; Flags: Fragment;
TRINITY_DN85845_c0_g1_i1	tr|A0A1D6RRG4|A0A1D6RRG4_WHEAT	33	1.2e-05	58.2	29.7	A0A1D6RRG4_WHEAT	Uncharacterized protein	SubName: Full=Uncharacterized protein {ECO:0000313|EnsemblPlants:TRIAE_CS42_3AS_TGACv1_212016_AA0696770.1};
TRINITY_DN85876_c0_g2_i1	tr|A0A024TM31|A0A024TM31_9STRA	334	1.6e-92	348.6	79.7	A0A024TM31_9STRA	ATP-dependent Clp protease, ATP-binding subunit ClpX	SubName: Full=ATP-dependent Clp protease, ATP-binding subunit ClpX {ECO:0000313|EMBL:ETV95215.1};
TRINITY_DN85876_c0_g2_i2	tr|A0A0P1A3U6|A0A0P1A3U6_9STRA	416	3.3e-93	350.9	99.8	A0A0P1A3U6_9STRA	Atp-dependent clp atp-binding subunit	SubName: Full=Atp-dependent clp atp-binding subunit {ECO:0000313|EMBL:CEG35141.1};
TRINITY_DN85882_c0_g1_i2	tr|A0A1J3EXH9|A0A1J3EXH9_NOCCA	90	2.3e-39	170.6	57.7	A0A1J3EXH9_NOCCA	60S ribosomal protein L31	SubName: Full=60S ribosomal protein L31 {ECO:0000313|EMBL:JAU36295.1}; Flags: Fragment;
TRINITY_DN85882_c0_g1_i1	tr|A0A1J3EXH9|A0A1J3EXH9_NOCCA	90	1.5e-39	171.4	53.8	A0A1J3EXH9_NOCCA	60S ribosomal protein L31	SubName: Full=60S ribosomal protein L31 {ECO:0000313|EMBL:JAU36295.1}; Flags: Fragment;
TRINITY_DN85869_c0_g1_i2	tr|M7Z657|M7Z657_TRIUA	48	3.5e-13	84	25	M7Z657_TRIUA	Serine/threonine-protein kinase ATM	SubName: Full=Serine/threonine-protein kinase ATM {ECO:0000313|EMBL:EMS55457.1, ECO:0000313|EnsemblPlants:TRIUR3_17614-P1};
TRINITY_DN85869_c0_g1_i1	tr|M7Z657|M7Z657_TRIUA	48	1.6e-13	84	54.5	M7Z657_TRIUA	Serine/threonine-protein kinase ATM	SubName: Full=Serine/threonine-protein kinase ATM {ECO:0000313|EMBL:EMS55457.1, ECO:0000313|EnsemblPlants:TRIUR3_17614-P1};
TRINITY_DN85865_c0_g1_i1	tr|A0A0E0G536|A0A0E0G536_ORYNI	70	1e-06	62.8	28.2	A0A0E0G536_ORYNI	E3 ubiquitin-protein ligase	RecName: Full=E3 ubiquitin-protein ligase {ECO:0000256|RuleBase:RU201113}; EC=2.3.2.27 {ECO:0000256|RuleBase:RU201113};
TRINITY_DN85851_c0_g1_i3	tr|A0A1D6AGH9|A0A1D6AGH9_WHEAT	118	2.1e-46	194.9	40.9	A0A1D6AGH9_WHEAT	Uncharacterized protein	SubName: Full=Uncharacterized protein {ECO:0000313|EnsemblPlants:TRIAE_CS42_6AS_TGACv1_486041_AA1555790.1};
TRINITY_DN85851_c0_g1_i1	tr|A0A1D6C8P2|A0A1D6C8P2_WHEAT	80	2.8e-31	143.3	73.8	A0A1D6C8P2_WHEAT	Uncharacterized protein	SubName: Full=Uncharacterized protein {ECO:0000313|EnsemblPlants:TRIAE_CS42_7BL_TGACv1_578382_AA1893980.1};
TRINITY_DN85872_c0_g1_i1	tr|A0A1D5S0L2|A0A1D5S0L2_WHEAT	53	9.2e-20	104.4	75.7	A0A1D5S0L2_WHEAT	Uncharacterized protein	SubName: Full=Uncharacterized protein {ECO:0000313|EnsemblPlants:TRIAE_CS42_1AS_TGACv1_018984_AA0057300.1};
TRINITY_DN85881_c0_g1_i1	tr|A0A1D5U8S6|A0A1D5U8S6_WHEAT	78	6.7e-15	89.4	49.6	A0A1D5U8S6_WHEAT	Uncharacterized protein	SubName: Full=Uncharacterized protein {ECO:0000313|EnsemblPlants:TRIAE_CS42_2BS_TGACv1_146234_AA0459750.1};
TRINITY_DN85880_c0_g1_i1	tr|A0A1D5SHQ1|A0A1D5SHQ1_WHEAT	126	2e-11	77	89.3	A0A1D5SHQ1_WHEAT	Uncharacterized protein	SubName: Full=Uncharacterized protein {ECO:0000313|EnsemblPlants:TRIAE_CS42_1BL_TGACv1_033854_AA0142340.1};
TRINITY_DN85880_c0_g1_i2	tr|A0A1D5SHQ1|A0A1D5SHQ1_WHEAT	221	1.9e-65	257.7	86.4	A0A1D5SHQ1_WHEAT	Uncharacterized protein	SubName: Full=Uncharacterized protein {ECO:0000313|EnsemblPlants:TRIAE_CS42_1BL_TGACv1_033854_AA0142340.1};
TRINITY_DN85880_c0_g2_i1	tr|A0A1D5SHQ1|A0A1D5SHQ1_WHEAT	196	6.2e-65	256.5	51.9	A0A1D5SHQ1_WHEAT	Uncharacterized protein	SubName: Full=Uncharacterized protein {ECO:0000313|EnsemblPlants:TRIAE_CS42_1BL_TGACv1_033854_AA0142340.1};
TRINITY_DN85842_c0_g2_i1	tr|R7W9Z0|R7W9Z0_AEGTA	30	5.6e-06	59.7	20	R7W9Z0_AEGTA	Uncharacterized protein	SubName: Full=Uncharacterized protein {ECO:0000313|EMBL:EMT14739.1, ECO:0000313|EnsemblPlants:EMT14739};
TRINITY_DN85814_c0_g1_i2	tr|A0A1D6D2L4|A0A1D6D2L4_WHEAT	62	4.7e-06	59.7	48.8	A0A1D6D2L4_WHEAT	Uncharacterized protein	SubName: Full=Uncharacterized protein {ECO:0000313|EnsemblPlants:TRIAE_CS42_7DS_TGACv1_623046_AA2049030.1};
TRINITY_DN85859_c0_g1_i2	tr|A0A1D5UBR0|A0A1D5UBR0_WHEAT	135	5.7e-53	216.1	62.6	A0A1D5UBR0_WHEAT	Uncharacterized protein	SubName: Full=Uncharacterized protein {ECO:0000313|EnsemblPlants:TRIAE_CS42_2BS_TGACv1_146918_AA0475400.1};
TRINITY_DN85859_c0_g1_i1	tr|A0A1D5UBR0|A0A1D5UBR0_WHEAT	107	5.3e-36	159.1	73.5	A0A1D5UBR0_WHEAT	Uncharacterized protein	SubName: Full=Uncharacterized protein {ECO:0000313|EnsemblPlants:TRIAE_CS42_2BS_TGACv1_146918_AA0475400.1};
TRINITY_DN85898_c0_g1_i1	tr|B8BNV4|B8BNV4_ORYSI	140	9.7e-35	155.6	71.7	B8BNV4_ORYSI	Uncharacterized protein	SubName: Full=Uncharacterized protein {ECO:0000313|EMBL:EEC68711.1};
TRINITY_DN85898_c0_g2_i1	tr|M8CNF0|M8CNF0_AEGTA	38	1.7e-11	77	50	M8CNF0_AEGTA	Putative Xaa-Pro aminopeptidase 3	SubName: Full=Putative Xaa-Pro aminopeptidase 3 {ECO:0000313|EMBL:EMT29007.1, ECO:0000313|EnsemblPlants:EMT29007};
TRINITY_DN85893_c0_g1_i1	tr|A0A0L0HJF8|A0A0L0HJF8_SPIPN	145	1.7e-62	247.7	84.3	A0A0L0HJF8_SPIPN	40S ribosomal protein S23	SubName: Full=40S ribosomal protein S23 {ECO:0000313|EMBL:KND01581.1};
TRINITY_DN85873_c0_g1_i1	tr|K3Z2M8|K3Z2M8_SETIT	37	1.5e-13	87	5.5	K3Z2M8_SETIT	Uncharacterized protein	SubName: Full=Uncharacterized protein {ECO:0000313|EMBL:KQK85775.1, ECO:0000313|EnsemblPlants:Si020796m};
TRINITY_DN85873_c0_g1_i2	tr|K3Z2M8|K3Z2M8_SETIT	37	1.5e-13	87	5.4	K3Z2M8_SETIT	Uncharacterized protein	SubName: Full=Uncharacterized protein {ECO:0000313|EMBL:KQK85775.1, ECO:0000313|EnsemblPlants:Si020796m};
TRINITY_DN85862_c0_g1_i2	tr|M8D4Z6|M8D4Z6_AEGTA	39	2.4e-12	82	11.4	M8D4Z6_AEGTA	Transmembrane protein 87B	SubName: Full=Transmembrane protein 87B {ECO:0000313|EMBL:EMT31401.1, ECO:0000313|EnsemblPlants:EMT31401};
TRINITY_DN85862_c0_g1_i1	tr|M8D4Z6|M8D4Z6_AEGTA	39	2.1e-12	82	12.8	M8D4Z6_AEGTA	Transmembrane protein 87B	SubName: Full=Transmembrane protein 87B {ECO:0000313|EMBL:EMT31401.1, ECO:0000313|EnsemblPlants:EMT31401};
TRINITY_DN85832_c0_g1_i1	tr|A0A1D5V7X6|A0A1D5V7X6_WHEAT	528	5e-137	497.3	69.8	A0A1D5V7X6_WHEAT	Uncharacterized protein	SubName: Full=Uncharacterized protein {ECO:0000313|EnsemblPlants:TRIAE_CS42_3AL_TGACv1_194402_AA0632510.1};
TRINITY_DN85832_c0_g1_i6	tr|A0A1D5V7X6|A0A1D5V7X6_WHEAT	535	6e-130	473.8	70.1	A0A1D5V7X6_WHEAT	Uncharacterized protein	SubName: Full=Uncharacterized protein {ECO:0000313|EnsemblPlants:TRIAE_CS42_3AL_TGACv1_194402_AA0632510.1};
TRINITY_DN85832_c0_g1_i3	tr|A0A1D5V7X6|A0A1D5V7X6_WHEAT	512	3.2e-126	461.8	49	A0A1D5V7X6_WHEAT	Uncharacterized protein	SubName: Full=Uncharacterized protein {ECO:0000313|EnsemblPlants:TRIAE_CS42_3AL_TGACv1_194402_AA0632510.1};
TRINITY_DN85832_c0_g1_i2	tr|A0A1D6A7B1|A0A1D6A7B1_WHEAT	382	2.1e-109	405.2	60.8	A0A1D6A7B1_WHEAT	Uncharacterized protein	SubName: Full=Uncharacterized protein {ECO:0000313|EnsemblPlants:TRIAE_CS42_6AL_TGACv1_471492_AA1509710.1};
TRINITY_DN85832_c0_g1_i4	tr|A0A1D6A7B1|A0A1D6A7B1_WHEAT	163	6.3e-16	92.8	88.8	A0A1D6A7B1_WHEAT	Uncharacterized protein	SubName: Full=Uncharacterized protein {ECO:0000313|EnsemblPlants:TRIAE_CS42_6AL_TGACv1_471492_AA1509710.1};
TRINITY_DN85832_c0_g2_i1	tr|A0A1D5W838|A0A1D5W838_WHEAT	598	2e-108	402.1	89.9	A0A1D5W838_WHEAT	Uncharacterized protein	SubName: Full=Uncharacterized protein {ECO:0000313|EnsemblPlants:TRIAE_CS42_3B_TGACv1_225517_AA0809320.1};
TRINITY_DN85832_c0_g3_i1	tr|A0A1D5V7X6|A0A1D5V7X6_WHEAT	131	5.9e-08	65.9	98.8	A0A1D5V7X6_WHEAT	Uncharacterized protein	SubName: Full=Uncharacterized protein {ECO:0000313|EnsemblPlants:TRIAE_CS42_3AL_TGACv1_194402_AA0632510.1};
TRINITY_DN85832_c2_g1_i1	tr|A0A1D6A7B1|A0A1D6A7B1_WHEAT	53	1.8e-16	93.6	69.1	A0A1D6A7B1_WHEAT	Uncharacterized protein	SubName: Full=Uncharacterized protein {ECO:0000313|EnsemblPlants:TRIAE_CS42_6AL_TGACv1_471492_AA1509710.1};
TRINITY_DN85863_c0_g1_i1	tr|D8L9K2|D8L9K2_WHEAT	111	1.9e-49	203.8	94.9	D8L9K2_WHEAT	Uncharacterized protein	SubName: Full=Uncharacterized protein {ECO:0000313|EMBL:CBH32555.1, ECO:0000313|EnsemblPlants:TRIAE_CS42_3B_TGACv1_222926_AA0773330.1};
TRINITY_DN85863_c0_g1_i2	tr|D8L9K2|D8L9K2_WHEAT	94	7.8e-41	174.9	94.6	D8L9K2_WHEAT	Uncharacterized protein	SubName: Full=Uncharacterized protein {ECO:0000313|EMBL:CBH32555.1, ECO:0000313|EnsemblPlants:TRIAE_CS42_3B_TGACv1_222926_AA0773330.1};
TRINITY_DN85829_c0_g1_i2	tr|A0A1D5T6S7|A0A1D5T6S7_WHEAT	71	1.3e-32	147.1	98.6	A0A1D5T6S7_WHEAT	Uncharacterized protein	SubName: Full=Uncharacterized protein {ECO:0000313|EnsemblPlants:TRIAE_CS42_2AL_TGACv1_093170_AA0273980.1};
TRINITY_DN85829_c0_g1_i1	tr|A0A1D5T6S7|A0A1D5T6S7_WHEAT	85	1.5e-40	173.7	98.8	A0A1D5T6S7_WHEAT	Uncharacterized protein	SubName: Full=Uncharacterized protein {ECO:0000313|EnsemblPlants:TRIAE_CS42_2AL_TGACv1_093170_AA0273980.1};
TRINITY_DN85829_c0_g2_i1	tr|N1QQB9|N1QQB9_AEGTA	125	1.5e-65	257.3	99.2	N1QQB9_AEGTA	Lectin-domain containing receptor kinase A4.3	SubName: Full=Lectin-domain containing receptor kinase A4.3 {ECO:0000313|EMBL:EMT02833.1, ECO:0000313|EnsemblPlants:EMT02833};
TRINITY_DN85829_c0_g2_i2	tr|N1QQB9|N1QQB9_AEGTA	105	3.3e-53	216.1	99.1	N1QQB9_AEGTA	Lectin-domain containing receptor kinase A4.3	SubName: Full=Lectin-domain containing receptor kinase A4.3 {ECO:0000313|EMBL:EMT02833.1, ECO:0000313|EnsemblPlants:EMT02833};
TRINITY_DN85829_c0_g3_i1	tr|A0A1D5T6S7|A0A1D5T6S7_WHEAT	31	1.4e-08	67.4	39.9	A0A1D5T6S7_WHEAT	Uncharacterized protein	SubName: Full=Uncharacterized protein {ECO:0000313|EnsemblPlants:TRIAE_CS42_2AL_TGACv1_093170_AA0273980.1};
TRINITY_DN85829_c1_g1_i1	tr|A0A1D5T6S7|A0A1D5T6S7_WHEAT	76	5e-35	155.2	98.7	A0A1D5T6S7_WHEAT	Uncharacterized protein	SubName: Full=Uncharacterized protein {ECO:0000313|EnsemblPlants:TRIAE_CS42_2AL_TGACv1_093170_AA0273980.1};
TRINITY_DN85829_c2_g1_i1	tr|A0A1D5T6S7|A0A1D5T6S7_WHEAT	54	7.8e-11	74.7	76.4	A0A1D5T6S7_WHEAT	Uncharacterized protein	SubName: Full=Uncharacterized protein {ECO:0000313|EnsemblPlants:TRIAE_CS42_2AL_TGACv1_093170_AA0273980.1};
TRINITY_DN85839_c0_g1_i1	tr|A0A183BJL7|A0A183BJL7_GLOPA	344	6.5e-171	609	85.9	A0A183BJL7_GLOPA	Uncharacterized protein	SubName: Full=Uncharacterized protein {ECO:0000313|WBParaSite:GPLIN_000079600};
TRINITY_DN85817_c0_g1_i1	sp|P01048|KNT1_RAT	211	3.4e-117	429.9	85.8	KNT1_RAT	T-kininogen 1; Alpha-1-MAP; Major acute phase protein; T-kininogen I; Thiostatin; T-kininogen 1 heavy chain; T-kininogen I heavy chain; T-kinin; T-kininogen 1 light chain; T-kininogen I light chain	RecName: Full=T-kininogen 1; AltName: Full=Alpha-1-MAP; AltName: Full=Major acute phase protein; AltName: Full=T-kininogen I; AltName: Full=Thiostatin; Contains: RecName: Full=T-kininogen 1 heavy chain; AltName: Full=T-kininogen I heavy chain; Contains: RecName: Full=T-kinin; Contains: RecName: Full=T-kininogen 1 light chain; AltName: Full=T-kininogen I light chain; Flags: Precursor;
TRINITY_DN85836_c0_g1_i2	tr|A0A1D5TCP3|A0A1D5TCP3_WHEAT	142	7.2e-60	239.2	67.6	A0A1D5TCP3_WHEAT	Uncharacterized protein	SubName: Full=Uncharacterized protein {ECO:0000313|EnsemblPlants:TRIAE_CS42_2AL_TGACv1_094714_AA0302030.1};
TRINITY_DN85810_c0_g1_i1	tr|K3ZLE5|K3ZLE5_SETIT	141	9.4e-61	242.3	59.1	K3ZLE5_SETIT	Uncharacterized protein	SubName: Full=Uncharacterized protein {ECO:0000313|EMBL:KQK93956.1, ECO:0000313|EnsemblPlants:Si027402m};
TRINITY_DN85889_c0_g2_i1	tr|A0A1D6AD04|A0A1D6AD04_WHEAT	202	1.1e-106	396	41.4	A0A1D6AD04_WHEAT	Uncharacterized protein	SubName: Full=Uncharacterized protein {ECO:0000313|EnsemblPlants:TRIAE_CS42_6AL_TGACv1_474251_AA1534700.1};
TRINITY_DN85897_c0_g1_i1	tr|A0A287IIA0|A0A287IIA0_HORVV	72	2.8e-11	76.3	97.7	A0A287IIA0_HORVV	Uncharacterized protein	SubName: Full=Uncharacterized protein {ECO:0000313|EnsemblPlants:HORVU2Hr1G076620.14};
TRINITY_DN85891_c0_g1_i2	tr|A0A1D5YCR3|A0A1D5YCR3_WHEAT	396	3.6e-221	776.2	86.2	A0A1D5YCR3_WHEAT	Glycosyltransferase	RecName: Full=Glycosyltransferase {ECO:0000256|RuleBase:RU362057}; EC=2.4.1.- {ECO:0000256|RuleBase:RU362057};
TRINITY_DN85891_c0_g1_i3	tr|Q2L3V6|Q2L3V6_WHEAT	223	5.8e-121	442.6	78.1	Q2L3V6_WHEAT	Glycosyltransferase	RecName: Full=Glycosyltransferase {ECO:0000256|RuleBase:RU362057}; EC=2.4.1.- {ECO:0000256|RuleBase:RU362057};
TRINITY_DN85891_c0_g1_i1	tr|A0A1D5YCR3|A0A1D5YCR3_WHEAT	396	2.2e-223	783.5	86.2	A0A1D5YCR3_WHEAT	Glycosyltransferase	RecName: Full=Glycosyltransferase {ECO:0000256|RuleBase:RU362057}; EC=2.4.1.- {ECO:0000256|RuleBase:RU362057};
TRINITY_DN85884_c0_g1_i1	tr|M8BUT9|M8BUT9_AEGTA	90	2.2e-32	147.9	42.1	M8BUT9_AEGTA	Uncharacterized protein	SubName: Full=Uncharacterized protein {ECO:0000313|EMBL:EMT10584.1, ECO:0000313|EnsemblPlants:EMT10584};
TRINITY_DN85884_c0_g1_i2	tr|M8BUT9|M8BUT9_AEGTA	43	4.1e-12	80.1	27.8	M8BUT9_AEGTA	Uncharacterized protein	SubName: Full=Uncharacterized protein {ECO:0000313|EMBL:EMT10584.1, ECO:0000313|EnsemblPlants:EMT10584};
TRINITY_DN85823_c0_g1_i1	tr|A0A1D5UPZ2|A0A1D5UPZ2_WHEAT	119	6.1e-61	243	46.3	A0A1D5UPZ2_WHEAT	Uncharacterized protein	SubName: Full=Uncharacterized protein {ECO:0000313|EnsemblPlants:TRIAE_CS42_2DL_TGACv1_159940_AA0544690.1};
TRINITY_DN85875_c0_g1_i7	tr|A0A1D6AUA6|A0A1D6AUA6_WHEAT	233	2.9e-122	448	39.5	A0A1D6AUA6_WHEAT	Uncharacterized protein	SubName: Full=Uncharacterized protein {ECO:0000313|EnsemblPlants:TRIAE_CS42_6BL_TGACv1_505669_AA1629250.1};
TRINITY_DN85875_c0_g1_i10	tr|A0A1D6AUA6|A0A1D6AUA6_WHEAT	233	2.9e-122	448	38.8	A0A1D6AUA6_WHEAT	Uncharacterized protein	SubName: Full=Uncharacterized protein {ECO:0000313|EnsemblPlants:TRIAE_CS42_6BL_TGACv1_505669_AA1629250.1};
TRINITY_DN85875_c0_g1_i6	tr|A0A1D6AUA6|A0A1D6AUA6_WHEAT	66	1.4e-29	138.7	30.6	A0A1D6AUA6_WHEAT	Uncharacterized protein	SubName: Full=Uncharacterized protein {ECO:0000313|EnsemblPlants:TRIAE_CS42_6BL_TGACv1_505669_AA1629250.1};
TRINITY_DN85875_c0_g1_i3	tr|A0A1D6AUA6|A0A1D6AUA6_WHEAT	233	2.9e-122	448	38.9	A0A1D6AUA6_WHEAT	Uncharacterized protein	SubName: Full=Uncharacterized protein {ECO:0000313|EnsemblPlants:TRIAE_CS42_6BL_TGACv1_505669_AA1629250.1};
TRINITY_DN85875_c0_g1_i1	tr|A0A1D6AUA6|A0A1D6AUA6_WHEAT	196	1.5e-104	387.9	79.8	A0A1D6AUA6_WHEAT	Uncharacterized protein	SubName: Full=Uncharacterized protein {ECO:0000313|EnsemblPlants:TRIAE_CS42_6BL_TGACv1_505669_AA1629250.1};
TRINITY_DN85875_c1_g1_i1	tr|A0A1D6AUA6|A0A1D6AUA6_WHEAT	54	8.1e-21	108.6	46.6	A0A1D6AUA6_WHEAT	Uncharacterized protein	SubName: Full=Uncharacterized protein {ECO:0000313|EnsemblPlants:TRIAE_CS42_6BL_TGACv1_505669_AA1629250.1};
TRINITY_DN85828_c0_g1_i2	tr|A0A1D5X4Z9|A0A1D5X4Z9_WHEAT	513	2.4e-259	903.3	88.6	A0A1D5X4Z9_WHEAT	Uncharacterized protein	SubName: Full=Uncharacterized protein {ECO:0000313|EnsemblPlants:TRIAE_CS42_4AL_TGACv1_289867_AA0978050.1};
TRINITY_DN85828_c0_g1_i1	tr|A0A1D5X4Z9|A0A1D5X4Z9_WHEAT	268	8.7e-127	461.8	99.4	A0A1D5X4Z9_WHEAT	Uncharacterized protein	SubName: Full=Uncharacterized protein {ECO:0000313|EnsemblPlants:TRIAE_CS42_4AL_TGACv1_289867_AA0978050.1};
TRINITY_DN85828_c0_g1_i3	tr|A0A1D5X4Z9|A0A1D5X4Z9_WHEAT	413	4.7e-208	732.6	86.3	A0A1D5X4Z9_WHEAT	Uncharacterized protein	SubName: Full=Uncharacterized protein {ECO:0000313|EnsemblPlants:TRIAE_CS42_4AL_TGACv1_289867_AA0978050.1};
TRINITY_DN85847_c0_g1_i9	tr|A0A1D6CC29|A0A1D6CC29_WHEAT	53	5.2e-14	85.5	63.3	A0A1D6CC29_WHEAT	Uncharacterized protein	SubName: Full=Uncharacterized protein {ECO:0000313|EnsemblPlants:TRIAE_CS42_7BL_TGACv1_580055_AA1911770.2};
TRINITY_DN85847_c0_g1_i5	tr|M7Z960|M7Z960_TRIUA	61	2e-14	89.4	13.4	M7Z960_TRIUA	Wall-associated receptor kinase-like 20	SubName: Full=Wall-associated receptor kinase-like 20 {ECO:0000313|EMBL:EMS56141.1, ECO:0000313|EnsemblPlants:TRIUR3_30711-P1};
TRINITY_DN85847_c0_g1_i7	tr|M7Z960|M7Z960_TRIUA	61	2.2e-14	89	16.2	M7Z960_TRIUA	Wall-associated receptor kinase-like 20	SubName: Full=Wall-associated receptor kinase-like 20 {ECO:0000313|EMBL:EMS56141.1, ECO:0000313|EnsemblPlants:TRIUR3_30711-P1};
TRINITY_DN85847_c0_g1_i10	tr|M7Z960|M7Z960_TRIUA	61	1.8e-14	89.4	14.7	M7Z960_TRIUA	Wall-associated receptor kinase-like 20	SubName: Full=Wall-associated receptor kinase-like 20 {ECO:0000313|EMBL:EMS56141.1, ECO:0000313|EnsemblPlants:TRIUR3_30711-P1};
TRINITY_DN85847_c0_g1_i3	tr|M7Z960|M7Z960_TRIUA	61	2.2e-14	89	16.2	M7Z960_TRIUA	Wall-associated receptor kinase-like 20	SubName: Full=Wall-associated receptor kinase-like 20 {ECO:0000313|EMBL:EMS56141.1, ECO:0000313|EnsemblPlants:TRIUR3_30711-P1};
TRINITY_DN85847_c0_g1_i6	tr|A0A1D6CC29|A0A1D6CC29_WHEAT	59	2.3e-13	84.7	27	A0A1D6CC29_WHEAT	Uncharacterized protein	SubName: Full=Uncharacterized protein {ECO:0000313|EnsemblPlants:TRIAE_CS42_7BL_TGACv1_580055_AA1911770.2};
TRINITY_DN85847_c0_g1_i2	tr|M7Z960|M7Z960_TRIUA	61	1.9e-14	89.4	14	M7Z960_TRIUA	Wall-associated receptor kinase-like 20	SubName: Full=Wall-associated receptor kinase-like 20 {ECO:0000313|EMBL:EMS56141.1, ECO:0000313|EnsemblPlants:TRIUR3_30711-P1};
TRINITY_DN85847_c0_g1_i4	tr|M7Z960|M7Z960_TRIUA	61	1.8e-14	89.4	15.2	M7Z960_TRIUA	Wall-associated receptor kinase-like 20	SubName: Full=Wall-associated receptor kinase-like 20 {ECO:0000313|EMBL:EMS56141.1, ECO:0000313|EnsemblPlants:TRIUR3_30711-P1};
TRINITY_DN85868_c1_g1_i4	tr|A0A287EQ04|A0A287EQ04_HORVV	75	1.7e-13	85.9	20.2	A0A287EQ04_HORVV	Uncharacterized protein	SubName: Full=Uncharacterized protein {ECO:0000313|EnsemblPlants:HORVU1Hr1G015060.9};
TRINITY_DN85868_c1_g1_i5	tr|A0A287KUD8|A0A287KUD8_HORVV	62	1.7e-07	64.7	41	A0A287KUD8_HORVV	Uncharacterized protein	SubName: Full=Uncharacterized protein {ECO:0000313|EnsemblPlants:HORVU3Hr1G039660.8};
TRINITY_DN85868_c1_g1_i1	tr|A0A287KUD8|A0A287KUD8_HORVV	62	1.6e-07	65.5	26.5	A0A287KUD8_HORVV	Uncharacterized protein	SubName: Full=Uncharacterized protein {ECO:0000313|EnsemblPlants:HORVU3Hr1G039660.8};
TRINITY_DN85868_c1_g1_i6	tr|A0A287EQ04|A0A287EQ04_HORVV	72	1.5e-09	72.8	19.3	A0A287EQ04_HORVV	Uncharacterized protein	SubName: Full=Uncharacterized protein {ECO:0000313|EnsemblPlants:HORVU1Hr1G015060.9};
TRINITY_DN85864_c0_g1_i1	tr|A0A1D5TSM8|A0A1D5TSM8_WHEAT	39	2.6e-09	69.7	52.5	A0A1D5TSM8_WHEAT	Uncharacterized protein	SubName: Full=Uncharacterized protein {ECO:0000313|EnsemblPlants:TRIAE_CS42_2BL_TGACv1_129307_AA0377670.1};
TRINITY_DN85864_c1_g1_i1	tr|A0A1D5TSM8|A0A1D5TSM8_WHEAT	138	2.5e-64	253.4	98.1	A0A1D5TSM8_WHEAT	Uncharacterized protein	SubName: Full=Uncharacterized protein {ECO:0000313|EnsemblPlants:TRIAE_CS42_2BL_TGACv1_129307_AA0377670.1};
TRINITY_DN85864_c1_g2_i1	tr|M8C1Y3|M8C1Y3_AEGTA	68	1e-23	117.5	98.6	M8C1Y3_AEGTA	Receptor-like protein kinase FERONIA	SubName: Full=Receptor-like protein kinase FERONIA {ECO:0000313|EMBL:EMT31255.1, ECO:0000313|EnsemblPlants:EMT31255};
TRINITY_DN85864_c1_g3_i1	tr|A0A1D5TSM8|A0A1D5TSM8_WHEAT	360	3.9e-161	577	62.9	A0A1D5TSM8_WHEAT	Uncharacterized protein	SubName: Full=Uncharacterized protein {ECO:0000313|EnsemblPlants:TRIAE_CS42_2BL_TGACv1_129307_AA0377670.1};
TRINITY_DN85864_c2_g1_i1	tr|A0A1D5TSM8|A0A1D5TSM8_WHEAT	83	5.3e-19	102.1	99.6	A0A1D5TSM8_WHEAT	Uncharacterized protein	SubName: Full=Uncharacterized protein {ECO:0000313|EnsemblPlants:TRIAE_CS42_2BL_TGACv1_129307_AA0377670.1};
TRINITY_DN85864_c2_g1_i2	tr|A0A1D5TSM8|A0A1D5TSM8_WHEAT	64	1.5e-12	80.5	82.5	A0A1D5TSM8_WHEAT	Uncharacterized protein	SubName: Full=Uncharacterized protein {ECO:0000313|EnsemblPlants:TRIAE_CS42_2BL_TGACv1_129307_AA0377670.1};
TRINITY_DN85835_c0_g1_i1	tr|A0A1D5TJF3|A0A1D5TJF3_WHEAT	135	1.1e-49	206.5	30.6	A0A1D5TJF3_WHEAT	Uncharacterized protein	SubName: Full=Uncharacterized protein {ECO:0000313|EnsemblPlants:TRIAE_CS42_2AS_TGACv1_112305_AA0335160.1};
TRINITY_DN85835_c0_g3_i1	tr|A0A1D5TJF3|A0A1D5TJF3_WHEAT	102	5.8e-26	127.9	19.5	A0A1D5TJF3_WHEAT	Uncharacterized protein	SubName: Full=Uncharacterized protein {ECO:0000313|EnsemblPlants:TRIAE_CS42_2AS_TGACv1_112305_AA0335160.1};
TRINITY_DN85835_c2_g1_i1	tr|A0A1D6S5R1|A0A1D6S5R1_WHEAT	105	3.9e-14	88.2	26	A0A1D6S5R1_WHEAT	Glycosyltransferase	RecName: Full=Glycosyltransferase {ECO:0000256|RuleBase:RU362057}; EC=2.4.1.- {ECO:0000256|RuleBase:RU362057};
TRINITY_DN85835_c2_g1_i2	tr|A0A1D6S5R1|A0A1D6S5R1_WHEAT	97	5.3e-11	76.6	53.8	A0A1D6S5R1_WHEAT	Glycosyltransferase	RecName: Full=Glycosyltransferase {ECO:0000256|RuleBase:RU362057}; EC=2.4.1.- {ECO:0000256|RuleBase:RU362057};
TRINITY_DN85835_c3_g1_i1	tr|F2EF14|F2EF14_HORVV	90	6.9e-07	62.4	74.4	F2EF14_HORVV	Predicted protein	SubName: Full=Predicted protein {ECO:0000313|EMBL:BAK05936.1};
TRINITY_DN85835_c3_g1_i2	tr|F2EF14|F2EF14_HORVV	121	7.2e-20	105.5	98.6	F2EF14_HORVV	Predicted protein	SubName: Full=Predicted protein {ECO:0000313|EMBL:BAK05936.1};
TRINITY_DN85848_c0_g1_i2	tr|F0W6U8|F0W6U8_9STRA	228	4.8e-39	170.6	70.2	F0W6U8_9STRA	Uncharacterized protein ALNC14_029860	SubName: Full=Uncharacterized protein ALNC14_029860 {ECO:0000313|EMBL:CCA16843.1};
TRINITY_DN85848_c0_g1_i1	tr|A0A067CX08|A0A067CX08_SAPPC	59	1.3e-05	58.5	38	A0A067CX08_SAPPC	Glutamate dehydrogenase	RecName: Full=Glutamate dehydrogenase {ECO:0000256|PIRNR:PIRNR000185};
TRINITY_DN85866_c0_g1_i1	tr|A0A1D5U0W3|A0A1D5U0W3_WHEAT	145	7.8e-47	195.7	80.3	A0A1D5U0W3_WHEAT	Uncharacterized protein	SubName: Full=Uncharacterized protein {ECO:0000313|EnsemblPlants:TRIAE_CS42_2BL_TGACv1_130718_AA0416600.1};
TRINITY_DN85866_c0_g2_i1	tr|A0A1D5S0L2|A0A1D5S0L2_WHEAT	316	5.5e-132	480.7	38.4	A0A1D5S0L2_WHEAT	Uncharacterized protein	SubName: Full=Uncharacterized protein {ECO:0000313|EnsemblPlants:TRIAE_CS42_1AS_TGACv1_018984_AA0057300.1};
TRINITY_DN85866_c1_g1_i2	tr|A0A1D5U0W3|A0A1D5U0W3_WHEAT	155	1.1e-54	221.9	82	A0A1D5U0W3_WHEAT	Uncharacterized protein	SubName: Full=Uncharacterized protein {ECO:0000313|EnsemblPlants:TRIAE_CS42_2BL_TGACv1_130718_AA0416600.1};
TRINITY_DN85866_c1_g1_i1	tr|A0A1D5U0W3|A0A1D5U0W3_WHEAT	177	2.5e-62	247.3	89.1	A0A1D5U0W3_WHEAT	Uncharacterized protein	SubName: Full=Uncharacterized protein {ECO:0000313|EnsemblPlants:TRIAE_CS42_2BL_TGACv1_130718_AA0416600.1};
TRINITY_DN85887_c0_g1_i3	tr|A0A1I8B4B5|A0A1I8B4B5_MELHA	204	1.1e-58	235.3	87.5	A0A1I8B4B5_MELHA	Uncharacterized protein	SubName: Full=Uncharacterized protein {ECO:0000313|WBParaSite:MhA1_Contig1391.frz3.gene10};
TRINITY_DN85887_c0_g1_i2	tr|A0A1I8B4B5|A0A1I8B4B5_MELHA	159	9.8e-57	228.4	96.3	A0A1I8B4B5_MELHA	Uncharacterized protein	SubName: Full=Uncharacterized protein {ECO:0000313|WBParaSite:MhA1_Contig1391.frz3.gene10};
TRINITY_DN85887_c0_g1_i1	tr|A0A1I8B4B5|A0A1I8B4B5_MELHA	125	2.3e-50	206.8	98.1	A0A1I8B4B5_MELHA	Uncharacterized protein	SubName: Full=Uncharacterized protein {ECO:0000313|WBParaSite:MhA1_Contig1391.frz3.gene10};
TRINITY_DN85821_c0_g1_i2	tr|A0A1D5SDE1|A0A1D5SDE1_WHEAT	162	1.2e-69	271.6	82.9	A0A1D5SDE1_WHEAT	Uncharacterized protein	SubName: Full=Uncharacterized protein {ECO:0000313|EnsemblPlants:TRIAE_CS42_1BL_TGACv1_031923_AA0122920.1};
TRINITY_DN85821_c0_g1_i1	tr|A0A1D6CIG3|A0A1D6CIG3_WHEAT	57	1.5e-21	110.9	52.3	A0A1D6CIG3_WHEAT	Uncharacterized protein	SubName: Full=Uncharacterized protein {ECO:0000313|EnsemblPlants:TRIAE_CS42_7BS_TGACv1_593156_AA1948760.1};
TRINITY_DN85821_c1_g1_i3	tr|A0A1D6ALI2|A0A1D6ALI2_WHEAT	159	2.8e-49	204.1	65.2	A0A1D6ALI2_WHEAT	Uncharacterized protein	SubName: Full=Uncharacterized protein {ECO:0000313|EnsemblPlants:TRIAE_CS42_6BL_TGACv1_499613_AA1587410.1};
TRINITY_DN85821_c1_g1_i4	tr|A0A1D6BFM2|A0A1D6BFM2_WHEAT	69	3.9e-31	142.1	99.5	A0A1D6BFM2_WHEAT	Uncharacterized protein	SubName: Full=Uncharacterized protein {ECO:0000313|EnsemblPlants:TRIAE_CS42_6DS_TGACv1_543676_AA1742890.1};
TRINITY_DN85821_c1_g1_i1	tr|A0A1D6BFM2|A0A1D6BFM2_WHEAT	478	2.9e-286	993.4	50.1	A0A1D6BFM2_WHEAT	Uncharacterized protein	SubName: Full=Uncharacterized protein {ECO:0000313|EnsemblPlants:TRIAE_CS42_6DS_TGACv1_543676_AA1742890.1};
TRINITY_DN85821_c1_g1_i2	tr|A0A1D6BFM2|A0A1D6BFM2_WHEAT	478	3.2e-286	993.4	46.2	A0A1D6BFM2_WHEAT	Uncharacterized protein	SubName: Full=Uncharacterized protein {ECO:0000313|EnsemblPlants:TRIAE_CS42_6DS_TGACv1_543676_AA1742890.1};
TRINITY_DN85821_c1_g2_i1	tr|A0A1D6D7A7|A0A1D6D7A7_WHEAT	65	6e-26	125.2	77.1	A0A1D6D7A7_WHEAT	Uncharacterized protein	SubName: Full=Uncharacterized protein {ECO:0000313|EnsemblPlants:TRIAE_CS42_U_TGACv1_640782_AA2074080.1};
TRINITY_DN85821_c2_g1_i1	tr|M8A9Y2|M8A9Y2_TRIUA	57	3.7e-18	99.4	65.5	M8A9Y2_TRIUA	Putative anion transporter 2, chloroplastic	SubName: Full=Putative anion transporter 2, chloroplastic {ECO:0000313|EMBL:EMS57304.1, ECO:0000313|EnsemblPlants:TRIUR3_33048-P1};
TRINITY_DN85821_c2_g2_i1	tr|A0A1D6BFM2|A0A1D6BFM2_WHEAT	96	2.5e-39	169.9	98.6	A0A1D6BFM2_WHEAT	Uncharacterized protein	SubName: Full=Uncharacterized protein {ECO:0000313|EnsemblPlants:TRIAE_CS42_6DS_TGACv1_543676_AA1742890.1};
TRINITY_DN85821_c2_g3_i1	tr|A0A1D6D7A7|A0A1D6D7A7_WHEAT	219	3.9e-125	456.1	99.8	A0A1D6D7A7_WHEAT	Uncharacterized protein	SubName: Full=Uncharacterized protein {ECO:0000313|EnsemblPlants:TRIAE_CS42_U_TGACv1_640782_AA2074080.1};
TRINITY_DN85821_c3_g1_i1	tr|A0A1D6CRJ1|A0A1D6CRJ1_WHEAT	58	5.7e-23	115.2	75.3	A0A1D6CRJ1_WHEAT	Uncharacterized protein	SubName: Full=Uncharacterized protein {ECO:0000313|EnsemblPlants:TRIAE_CS42_7DL_TGACv1_603892_AA1990770.1};
TRINITY_DN85821_c4_g1_i1	tr|A0A1D6AQ39|A0A1D6AQ39_WHEAT	114	1.7e-55	223.8	100	A0A1D6AQ39_WHEAT	Uncharacterized protein	SubName: Full=Uncharacterized protein {ECO:0000313|EnsemblPlants:TRIAE_CS42_6BL_TGACv1_500601_AA1607000.1};
TRINITY_DN85821_c5_g1_i1	tr|A0A1D5SDE1|A0A1D5SDE1_WHEAT	101	9.1e-45	188	99.3	A0A1D5SDE1_WHEAT	Uncharacterized protein	SubName: Full=Uncharacterized protein {ECO:0000313|EnsemblPlants:TRIAE_CS42_1BL_TGACv1_031923_AA0122920.1};
TRINITY_DN85871_c0_g1_i1	tr|A0A139AQG4|A0A139AQG4_GONPR	285	4.3e-62	247.3	79.3	A0A139AQG4_GONPR	MaoC-like dehydratase	SubName: Full=MaoC-like dehydratase {ECO:0000313|EMBL:KXS18725.1};
TRINITY_DN85871_c0_g1_i2	tr|A0A139AQG4|A0A139AQG4_GONPR	189	8.5e-29	136	86.9	A0A139AQG4_GONPR	MaoC-like dehydratase	SubName: Full=MaoC-like dehydratase {ECO:0000313|EMBL:KXS18725.1};
TRINITY_DN85834_c0_g1_i1	tr|A0A1D5UEC7|A0A1D5UEC7_WHEAT	75	1.1e-18	100.9	92	A0A1D5UEC7_WHEAT	Uncharacterized protein	SubName: Full=Uncharacterized protein {ECO:0000313|EnsemblPlants:TRIAE_CS42_2BS_TGACv1_147888_AA0488710.1};
TRINITY_DN85834_c0_g1_i2	tr|A0A1D5UEC7|A0A1D5UEC7_WHEAT	120	2e-41	177.9	53.9	A0A1D5UEC7_WHEAT	Uncharacterized protein	SubName: Full=Uncharacterized protein {ECO:0000313|EnsemblPlants:TRIAE_CS42_2BS_TGACv1_147888_AA0488710.1};
TRINITY_DN85834_c0_g1_i3	tr|A0A1D5UEC7|A0A1D5UEC7_WHEAT	122	2.5e-28	134.4	55.1	A0A1D5UEC7_WHEAT	Uncharacterized protein	SubName: Full=Uncharacterized protein {ECO:0000313|EnsemblPlants:TRIAE_CS42_2BS_TGACv1_147888_AA0488710.1};
TRINITY_DN85892_c0_g1_i2	tr|A0A1D6A951|A0A1D6A951_WHEAT	120	1.1e-17	98.6	77.1	A0A1D6A951_WHEAT	Uncharacterized protein	SubName: Full=Uncharacterized protein {ECO:0000313|EnsemblPlants:TRIAE_CS42_6AL_TGACv1_472106_AA1517790.1};
TRINITY_DN85892_c0_g1_i1	tr|A0A1D6A951|A0A1D6A951_WHEAT	115	1.5e-19	104.8	76.3	A0A1D6A951_WHEAT	Uncharacterized protein	SubName: Full=Uncharacterized protein {ECO:0000313|EnsemblPlants:TRIAE_CS42_6AL_TGACv1_472106_AA1517790.1};
TRINITY_DN85899_c0_g1_i2	tr|A0A152A7V9|A0A152A7V9_9MYCE	278	1.7e-68	268.9	65.4	A0A152A7V9_9MYCE	Actin bundling protein	SubName: Full=Actin bundling protein {ECO:0000313|EMBL:KYR02323.1};
TRINITY_DN85899_c0_g1_i3	tr|A0A152A7V9|A0A152A7V9_9MYCE	278	1.8e-68	268.5	79.9	A0A152A7V9_9MYCE	Actin bundling protein	SubName: Full=Actin bundling protein {ECO:0000313|EMBL:KYR02323.1};
TRINITY_DN85899_c0_g1_i1	tr|A0A152A7V9|A0A152A7V9_9MYCE	278	2.2e-68	268.5	65.4	A0A152A7V9_9MYCE	Actin bundling protein	SubName: Full=Actin bundling protein {ECO:0000313|EMBL:KYR02323.1};
TRINITY_DN85837_c0_g1_i1	tr|A0A1D6C3Q2|A0A1D6C3Q2_WHEAT	28	0.0001	54.7	32.8	A0A1D6C3Q2_WHEAT	Phytoene synthase 7B	SubName: Full=Phytoene synthase 7B {ECO:0000313|EnsemblPlants:TRIAE_CS42_7BL_TGACv1_577069_AA1865150.5};
TRINITY_DN85837_c0_g1_i2	tr|A0A1D6C3Q2|A0A1D6C3Q2_WHEAT	38	6.4e-10	72	41.6	A0A1D6C3Q2_WHEAT	Phytoene synthase 7B	SubName: Full=Phytoene synthase 7B {ECO:0000313|EnsemblPlants:TRIAE_CS42_7BL_TGACv1_577069_AA1865150.5};
TRINITY_DN85837_c0_g2_i1	tr|A0A1D6C3Q2|A0A1D6C3Q2_WHEAT	46	2.4e-07	63.9	37.6	A0A1D6C3Q2_WHEAT	Phytoene synthase 7B	SubName: Full=Phytoene synthase 7B {ECO:0000313|EnsemblPlants:TRIAE_CS42_7BL_TGACv1_577069_AA1865150.5};
TRINITY_DN85822_c0_g1_i3	tr|M8ATV0|M8ATV0_TRIUA	30	9.2e-05	56.2	13.3	M8ATV0_TRIUA	Uncharacterized protein	SubName: Full=Uncharacterized protein {ECO:0000313|EMBL:EMS64434.1, ECO:0000313|EnsemblPlants:TRIUR3_20115-P1};
TRINITY_DN85822_c0_g1_i1	tr|A0A0D9XYF2|A0A0D9XYF2_9ORYZ	162	2.5e-38	168.7	36.2	A0A0D9XYF2_9ORYZ	Uncharacterized protein	SubName: Full=Uncharacterized protein {ECO:0000313|EnsemblPlants:LPERR12G07230.1};
TRINITY_DN85822_c0_g2_i1	tr|A0A0D9XYF2|A0A0D9XYF2_9ORYZ	133	3.1e-28	133.3	90.3	A0A0D9XYF2_9ORYZ	Uncharacterized protein	SubName: Full=Uncharacterized protein {ECO:0000313|EnsemblPlants:LPERR12G07230.1};
TRINITY_DN85822_c0_g2_i2	tr|A0A0D9XYF2|A0A0D9XYF2_9ORYZ	133	1.8e-41	177.6	91.9	A0A0D9XYF2_9ORYZ	Uncharacterized protein	SubName: Full=Uncharacterized protein {ECO:0000313|EnsemblPlants:LPERR12G07230.1};
TRINITY_DN85822_c0_g4_i1	tr|A0A0D9XYF2|A0A0D9XYF2_9ORYZ	92	1.4e-23	117.5	99.6	A0A0D9XYF2_9ORYZ	Uncharacterized protein	SubName: Full=Uncharacterized protein {ECO:0000313|EnsemblPlants:LPERR12G07230.1};
TRINITY_DN85800_c0_g1_i2	tr|M8AP77|M8AP77_TRIUA	44	1.8e-07	64.7	28	M8AP77_TRIUA	Myb-related protein 3R-1	SubName: Full=Myb-related protein 3R-1 {ECO:0000313|EMBL:EMS62784.1, ECO:0000313|EnsemblPlants:TRIUR3_27706-P1};
TRINITY_DN85800_c0_g4_i1	tr|A0A1D6RFU7|A0A1D6RFU7_WHEAT	62	4.9e-16	92	86.1	A0A1D6RFU7_WHEAT	Uncharacterized protein	SubName: Full=Uncharacterized protein {ECO:0000313|EnsemblPlants:TRIAE_CS42_1DL_TGACv1_062234_AA0211100.1};
TRINITY_DN85811_c0_g1_i6	tr|A0A1D5ZKQ4|A0A1D5ZKQ4_WHEAT	168	6.7e-69	269.2	77.8	A0A1D5ZKQ4_WHEAT	Uncharacterized protein	SubName: Full=Uncharacterized protein {ECO:0000313|EnsemblPlants:TRIAE_CS42_5DL_TGACv1_433182_AA1404900.4};
TRINITY_DN85811_c0_g1_i4	tr|A0A1D5ZKQ4|A0A1D5ZKQ4_WHEAT	168	9.5e-69	269.2	54.3	A0A1D5ZKQ4_WHEAT	Uncharacterized protein	SubName: Full=Uncharacterized protein {ECO:0000313|EnsemblPlants:TRIAE_CS42_5DL_TGACv1_433182_AA1404900.4};
TRINITY_DN85811_c0_g1_i3	tr|A0A1D5ZAB2|A0A1D5ZAB2_WHEAT	138	1.3e-57	232.3	44.9	A0A1D5ZAB2_WHEAT	Uncharacterized protein	SubName: Full=Uncharacterized protein {ECO:0000313|EnsemblPlants:TRIAE_CS42_5BL_TGACv1_406832_AA1350260.1};
TRINITY_DN85802_c0_g1_i4	tr|A0A1D6AWY1|A0A1D6AWY1_WHEAT	96	1.3e-41	177.6	87.8	A0A1D6AWY1_WHEAT	Uncharacterized protein	SubName: Full=Uncharacterized protein {ECO:0000313|EnsemblPlants:TRIAE_CS42_6BS_TGACv1_513611_AA1645790.1};
TRINITY_DN85802_c0_g1_i2	tr|A0A1D6AWY1|A0A1D6AWY1_WHEAT	179	9.5e-73	282	86.2	A0A1D6AWY1_WHEAT	Uncharacterized protein	SubName: Full=Uncharacterized protein {ECO:0000313|EnsemblPlants:TRIAE_CS42_6BS_TGACv1_513611_AA1645790.1};
TRINITY_DN85802_c0_g1_i3	tr|A0A1D6AWY1|A0A1D6AWY1_WHEAT	179	4.5e-66	260.4	56.5	A0A1D6AWY1_WHEAT	Uncharacterized protein	SubName: Full=Uncharacterized protein {ECO:0000313|EnsemblPlants:TRIAE_CS42_6BS_TGACv1_513611_AA1645790.1};
TRINITY_DN85815_c0_g1_i1	tr|M8BIM5|M8BIM5_AEGTA	54	9.8e-23	116.7	14.1	M8BIM5_AEGTA	Protein roadkill	SubName: Full=Protein roadkill {ECO:0000313|EMBL:EMT21794.1, ECO:0000313|EnsemblPlants:EMT21794};
TRINITY_DN85815_c0_g1_i2	tr|M8BIM5|M8BIM5_AEGTA	54	8.4e-23	116.7	16.5	M8BIM5_AEGTA	Protein roadkill	SubName: Full=Protein roadkill {ECO:0000313|EMBL:EMT21794.1, ECO:0000313|EnsemblPlants:EMT21794};
TRINITY_DN85815_c0_g1_i4	tr|M8BIM5|M8BIM5_AEGTA	37	2e-10	74.7	20.4	M8BIM5_AEGTA	Protein roadkill	SubName: Full=Protein roadkill {ECO:0000313|EMBL:EMT21794.1, ECO:0000313|EnsemblPlants:EMT21794};
TRINITY_DN85815_c0_g1_i3	tr|M8BIM5|M8BIM5_AEGTA	54	2.9e-21	111.3	20	M8BIM5_AEGTA	Protein roadkill	SubName: Full=Protein roadkill {ECO:0000313|EMBL:EMT21794.1, ECO:0000313|EnsemblPlants:EMT21794};
TRINITY_DN85890_c0_g1_i2	tr|F0ZEH4|F0ZEH4_DICPU	101	2.1e-13	84.3	69	F0ZEH4_DICPU	Uncharacterized protein	SubName: Full=Uncharacterized protein {ECO:0000313|EMBL:EGC37627.1};
TRINITY_DN85890_c0_g1_i4	tr|A0A0P1AEN1|A0A0P1AEN1_9STRA	353	3.4e-21	112.1	64.4	A0A0P1AEN1_9STRA	Tetratricopeptide-like helical	SubName: Full=Tetratricopeptide-like helical {ECO:0000313|EMBL:CEG39301.1};
TRINITY_DN85890_c0_g1_i1	tr|A0A0P1AEN1|A0A0P1AEN1_9STRA	310	1.1e-19	106.3	96.3	A0A0P1AEN1_9STRA	Tetratricopeptide-like helical	SubName: Full=Tetratricopeptide-like helical {ECO:0000313|EMBL:CEG39301.1};
TRINITY_DN85838_c0_g1_i1	tr|W5CXX1|W5CXX1_WHEAT	151	9.4e-66	259.2	51.1	W5CXX1_WHEAT	Uncharacterized protein	SubName: Full=Uncharacterized protein {ECO:0000313|EMBL:CDM84080.1, ECO:0000313|EnsemblPlants:TRIAE_CS42_3B_TGACv1_224444_AA0796880.1};
TRINITY_DN85838_c0_g1_i2	tr|W5CXX1|W5CXX1_WHEAT	151	3.2e-66	260.8	51.1	W5CXX1_WHEAT	Uncharacterized protein	SubName: Full=Uncharacterized protein {ECO:0000313|EMBL:CDM84080.1, ECO:0000313|EnsemblPlants:TRIAE_CS42_3B_TGACv1_224444_AA0796880.1};
TRINITY_DN92392_c0_g1_i2	tr|A0A1D5UM69|A0A1D5UM69_WHEAT	157	2.7e-18	101.7	47.7	A0A1D5UM69_WHEAT	Uncharacterized protein	SubName: Full=Uncharacterized protein {ECO:0000313|EnsemblPlants:TRIAE_CS42_2DL_TGACv1_159084_AA0532050.1};
TRINITY_DN92392_c0_g1_i1	tr|A0A1D5UM69|A0A1D5UM69_WHEAT	176	4.8e-21	110.2	85.1	A0A1D5UM69_WHEAT	Uncharacterized protein	SubName: Full=Uncharacterized protein {ECO:0000313|EnsemblPlants:TRIAE_CS42_2DL_TGACv1_159084_AA0532050.1};
TRINITY_DN92345_c0_g1_i2	tr|A0A1D5VX29|A0A1D5VX29_WHEAT	86	6.4e-41	176	47.4	A0A1D5VX29_WHEAT	Uncharacterized protein	SubName: Full=Uncharacterized protein {ECO:0000313|EnsemblPlants:TRIAE_CS42_3B_TGACv1_222044_AA0755670.2};
TRINITY_DN92345_c0_g1_i1	tr|A0A1D5VX29|A0A1D5VX29_WHEAT	55	9.2e-19	102.4	29.9	A0A1D5VX29_WHEAT	Uncharacterized protein	SubName: Full=Uncharacterized protein {ECO:0000313|EnsemblPlants:TRIAE_CS42_3B_TGACv1_222044_AA0755670.2};
TRINITY_DN92352_c0_g1_i1	sp|P11857|TBB_STYLE	78	4.9e-38	165.2	99.2	TBB_STYLE	Tubulin beta chain; Beta-tubulin	RecName: Full=Tubulin beta chain; AltName: Full=Beta-tubulin;
TRINITY_DN92394_c0_g1_i1	tr|M8A8X1|M8A8X1_TRIUA	33	5.8e-06	58.9	35.6	M8A8X1_TRIUA	60S ribosomal protein L5-1	SubName: Full=60S ribosomal protein L5-1 {ECO:0000313|EMBL:EMS56939.1, ECO:0000313|EnsemblPlants:TRIUR3_11244-P1};
TRINITY_DN92305_c0_g2_i1	tr|A0A0V0YQY1|A0A0V0YQY1_9BILA	88	3.3e-12	80.9	41.7	A0A0V0YQY1_9BILA	Uncharacterized protein	SubName: Full=Uncharacterized protein {ECO:0000313|EMBL:KRY02772.1}; Flags: Fragment;
TRINITY_DN92305_c2_g1_i1	tr|M7Z2Y9|M7Z2Y9_TRIUA	58	1.1e-17	97.4	83.3	M7Z2Y9_TRIUA	Uncharacterized protein	SubName: Full=Uncharacterized protein {ECO:0000313|EMBL:EMS46730.1, ECO:0000313|EnsemblPlants:TRIUR3_13117-P1};
TRINITY_DN92390_c1_g1_i1	tr|R7WDP0|R7WDP0_AEGTA	81	2.3e-38	166.4	99.2	R7WDP0_AEGTA	Potassium transporter	RecName: Full=Potassium transporter {ECO:0000256|RuleBase:RU321113};
TRINITY_DN92333_c0_g1_i1	tr|A0A255ENC3|A0A255ENC3_9ACTN	192	2.7e-28	134.8	62.2	A0A255ENC3_9ACTN	Uncharacterized protein	SubName: Full=Uncharacterized protein {ECO:0000313|EMBL:OYN92720.1};
TRINITY_DN92372_c0_g1_i3	tr|A0A1D5V629|A0A1D5V629_WHEAT	145	4.7e-40	174.9	24.1	A0A1D5V629_WHEAT	Uncharacterized protein	SubName: Full=Uncharacterized protein {ECO:0000313|EnsemblPlants:TRIAE_CS42_3AL_TGACv1_193998_AA0624300.1};
TRINITY_DN92359_c0_g1_i1	tr|T1NFF2|T1NFF2_TRIUA	41	1.5e-08	67.4	48.2	T1NFF2_TRIUA	Fatty acyl-CoA reductase	RecName: Full=Fatty acyl-CoA reductase {ECO:0000256|RuleBase:RU363097}; EC=1.2.1.84 {ECO:0000256|RuleBase:RU363097};
TRINITY_DN92368_c1_g1_i1	tr|A0A287EIF9|A0A287EIF9_HORVV	115	1.4e-20	107.8	99.1	A0A287EIF9_HORVV	Uncharacterized protein	SubName: Full=Uncharacterized protein {ECO:0000313|EnsemblPlants:HORVU1Hr1G004790.8};
TRINITY_DN92316_c0_g1_i1	tr|A0A1D6B8I6|A0A1D6B8I6_WHEAT	96	7.7e-23	116.3	41.9	A0A1D6B8I6_WHEAT	Uncharacterized protein	SubName: Full=Uncharacterized protein {ECO:0000313|EnsemblPlants:TRIAE_CS42_6DL_TGACv1_527673_AA1707160.1};
TRINITY_DN92398_c0_g1_i1	tr|A0A1D6DBT8|A0A1D6DBT8_WHEAT	66	8.8e-28	131	97.5	A0A1D6DBT8_WHEAT	Uncharacterized protein	SubName: Full=Uncharacterized protein {ECO:0000313|EnsemblPlants:TRIAE_CS42_U_TGACv1_641522_AA2097080.3};
TRINITY_DN92393_c0_g1_i2	tr|M7ZXK8|M7ZXK8_TRIUA	98	4.1e-46	193.4	51.9	M7ZXK8_TRIUA	Uncharacterized protein	SubName: Full=Uncharacterized protein {ECO:0000313|EMBL:EMS67913.1, ECO:0000313|EnsemblPlants:TRIUR3_21737-P1};
TRINITY_DN92393_c0_g1_i1	tr|M7ZXK8|M7ZXK8_TRIUA	98	2e-48	201.1	49.5	M7ZXK8_TRIUA	Uncharacterized protein	SubName: Full=Uncharacterized protein {ECO:0000313|EMBL:EMS67913.1, ECO:0000313|EnsemblPlants:TRIUR3_21737-P1};
TRINITY_DN92388_c0_g1_i1	tr|W5GFZ5|W5GFZ5_WHEAT	94	4e-38	166.8	49.2	W5GFZ5_WHEAT	Uncharacterized protein	SubName: Full=Uncharacterized protein {ECO:0000313|EnsemblPlants:TRIAE_CS42_6AS_TGACv1_485702_AA1550410.1};
TRINITY_DN92388_c0_g1_i2	tr|A0A1D6AUE4|A0A1D6AUE4_WHEAT	92	3.2e-43	183.7	48.7	A0A1D6AUE4_WHEAT	Uncharacterized protein	SubName: Full=Uncharacterized protein {ECO:0000313|EnsemblPlants:TRIAE_CS42_6BS_TGACv1_513126_AA1630770.1};
TRINITY_DN92318_c0_g1_i1	tr|W5BFR3|W5BFR3_WHEAT	43	3.1e-15	89.4	59.2	W5BFR3_WHEAT	RING-type E3 ubiquitin transferase	RecName: Full=RING-type E3 ubiquitin transferase {ECO:0000256|SAAS:SAAS00702733}; EC=2.3.2.27 {ECO:0000256|SAAS:SAAS00702733};
TRINITY_DN92396_c0_g1_i1	tr|F2DY96|F2DY96_HORVV	97	2.7e-46	193	99.3	F2DY96_HORVV	Predicted protein	SubName: Full=Predicted protein {ECO:0000313|EMBL:BAK00068.1, ECO:0000313|EnsemblPlants:HORVU7Hr1G101530.2};
TRINITY_DN92348_c0_g1_i1	tr|M7YCQ2|M7YCQ2_TRIUA	58	1.2e-25	124	79.1	M7YCQ2_TRIUA	Beta-amylase	RecName: Full=Beta-amylase {ECO:0000256|RuleBase:RU000509}; EC=3.2.1.2 {ECO:0000256|RuleBase:RU000509};
TRINITY_DN92337_c0_g1_i1	tr|M8BIL2|M8BIL2_AEGTA	34	0.00071	53.5	12.8	M8BIL2_AEGTA	Uncharacterized protein	SubName: Full=Uncharacterized protein {ECO:0000313|EMBL:EMT21598.1, ECO:0000313|EnsemblPlants:EMT21598};
TRINITY_DN92397_c0_g1_i3	tr|A0A1D5X5A4|A0A1D5X5A4_WHEAT	495	8.9e-271	941.8	59.1	A0A1D5X5A4_WHEAT	Uncharacterized protein	SubName: Full=Uncharacterized protein {ECO:0000313|EnsemblPlants:TRIAE_CS42_4AL_TGACv1_289953_AA0979420.1};
TRINITY_DN92397_c0_g1_i2	tr|M8BZY4|M8BZY4_AEGTA	495	7e-267	929.1	50.1	M8BZY4_AEGTA	Uncharacterized protein	SubName: Full=Uncharacterized protein {ECO:0000313|EMBL:EMT12389.1, ECO:0000313|EnsemblPlants:EMT12389};
TRINITY_DN92397_c0_g1_i1	tr|M8BZY4|M8BZY4_AEGTA	495	7.5e-267	929.1	46.9	M8BZY4_AEGTA	Uncharacterized protein	SubName: Full=Uncharacterized protein {ECO:0000313|EMBL:EMT12389.1, ECO:0000313|EnsemblPlants:EMT12389};
TRINITY_DN92397_c0_g2_i1	tr|M7ZHZ3|M7ZHZ3_TRIUA	131	4.5e-68	265.8	100	M7ZHZ3_TRIUA	Uncharacterized protein	SubName: Full=Uncharacterized protein {ECO:0000313|EMBL:EMS59256.1, ECO:0000313|EnsemblPlants:TRIUR3_07636-P1};
TRINITY_DN92397_c1_g1_i2	tr|A0A1D5X664|A0A1D5X664_WHEAT	414	5.3e-189	669.5	80.1	A0A1D5X664_WHEAT	Uncharacterized protein	SubName: Full=Uncharacterized protein {ECO:0000313|EnsemblPlants:TRIAE_CS42_4AL_TGACv1_290211_AA0982990.1};
TRINITY_DN92397_c1_g1_i3	tr|A0A1D5X664|A0A1D5X664_WHEAT	134	4.4e-58	233.4	57.3	A0A1D5X664_WHEAT	Uncharacterized protein	SubName: Full=Uncharacterized protein {ECO:0000313|EnsemblPlants:TRIAE_CS42_4AL_TGACv1_290211_AA0982990.1};
TRINITY_DN92397_c1_g1_i1	tr|A0A1D5ZAM3|A0A1D5ZAM3_WHEAT	133	2.2e-70	273.5	100	A0A1D5ZAM3_WHEAT	Uncharacterized protein	SubName: Full=Uncharacterized protein {ECO:0000313|EnsemblPlants:TRIAE_CS42_5BL_TGACv1_406911_AA1351440.1};
TRINITY_DN92397_c1_g2_i1	tr|A0A1D5X664|A0A1D5X664_WHEAT	111	5.7e-56	225.3	99.4	A0A1D5X664_WHEAT	Uncharacterized protein	SubName: Full=Uncharacterized protein {ECO:0000313|EnsemblPlants:TRIAE_CS42_4AL_TGACv1_290211_AA0982990.1};
TRINITY_DN92397_c2_g1_i1	tr|A0A1D5ZLN4|A0A1D5ZLN4_WHEAT	43	6.2e-17	95.9	32.6	A0A1D5ZLN4_WHEAT	Uncharacterized protein	SubName: Full=Uncharacterized protein {ECO:0000313|EnsemblPlants:TRIAE_CS42_5DL_TGACv1_433307_AA1408940.1};
TRINITY_DN92343_c2_g1_i1	tr|A0A1D5ZET9|A0A1D5ZET9_WHEAT	88	4.7e-13	82.4	99.2	A0A1D5ZET9_WHEAT	Uncharacterized protein	SubName: Full=Uncharacterized protein {ECO:0000313|EnsemblPlants:TRIAE_CS42_5BS_TGACv1_423294_AA1373570.1};
TRINITY_DN92385_c0_g1_i1	tr|M8AXT7|M8AXT7_AEGTA	34	2.8e-07	63.9	24.2	M8AXT7_AEGTA	Uncharacterized protein	SubName: Full=Uncharacterized protein {ECO:0000313|EMBL:EMT06505.1, ECO:0000313|EnsemblPlants:EMT06505};
TRINITY_DN92366_c0_g1_i1	tr|A0A1D6BPG5|A0A1D6BPG5_WHEAT	109	1.3e-52	214.5	75.3	A0A1D6BPG5_WHEAT	Uncharacterized protein	SubName: Full=Uncharacterized protein {ECO:0000313|EnsemblPlants:TRIAE_CS42_7AL_TGACv1_557989_AA1788740.1};
TRINITY_DN92325_c0_g1_i2	tr|A0A1D5VLD9|A0A1D5VLD9_WHEAT	80	5.7e-42	178.3	99.2	A0A1D5VLD9_WHEAT	Uncharacterized protein	SubName: Full=Uncharacterized protein {ECO:0000313|EnsemblPlants:TRIAE_CS42_3AS_TGACv1_212383_AA0700400.1};
TRINITY_DN92330_c0_g1_i2	tr|M8AH37|M8AH37_TRIUA	116	7.4e-59	235.3	77.3	M8AH37_TRIUA	Uncharacterized protein	SubName: Full=Uncharacterized protein {ECO:0000313|EMBL:EMS64220.1, ECO:0000313|EnsemblPlants:TRIUR3_22342-P1};
TRINITY_DN92320_c0_g1_i3	tr|A0A1D5SN02|A0A1D5SN02_WHEAT	206	1.2e-117	431.8	60.8	A0A1D5SN02_WHEAT	Uncharacterized protein	SubName: Full=Uncharacterized protein {ECO:0000313|EnsemblPlants:TRIAE_CS42_1BS_TGACv1_050708_AA0174560.1};
TRINITY_DN92320_c0_g1_i2	tr|A0A1D5SN02|A0A1D5SN02_WHEAT	206	1.4e-117	431.8	54.4	A0A1D5SN02_WHEAT	Uncharacterized protein	SubName: Full=Uncharacterized protein {ECO:0000313|EnsemblPlants:TRIAE_CS42_1BS_TGACv1_050708_AA0174560.1};
TRINITY_DN92320_c0_g1_i1	tr|A0A1D5SN02|A0A1D5SN02_WHEAT	206	2.1e-117	431.4	46.1	A0A1D5SN02_WHEAT	Uncharacterized protein	SubName: Full=Uncharacterized protein {ECO:0000313|EnsemblPlants:TRIAE_CS42_1BS_TGACv1_050708_AA0174560.1};
TRINITY_DN92371_c0_g1_i1	tr|M7YRS4|M7YRS4_TRIUA	72	3e-34	152.5	99.1	M7YRS4_TRIUA	Wall-associated receptor kinase 3	SubName: Full=Wall-associated receptor kinase 3 {ECO:0000313|EMBL:EMS50137.1, ECO:0000313|EnsemblPlants:TRIUR3_22387-P1};
TRINITY_DN92371_c0_g1_i2	tr|M7YRS4|M7YRS4_TRIUA	87	1.3e-44	187.2	99.6	M7YRS4_TRIUA	Wall-associated receptor kinase 3	SubName: Full=Wall-associated receptor kinase 3 {ECO:0000313|EMBL:EMS50137.1, ECO:0000313|EnsemblPlants:TRIUR3_22387-P1};
TRINITY_DN92371_c0_g2_i1	tr|A0A1D5ZZN8|A0A1D5ZZN8_WHEAT	269	7.3e-150	538.5	99.8	A0A1D5ZZN8_WHEAT	Uncharacterized protein	SubName: Full=Uncharacterized protein {ECO:0000313|EnsemblPlants:TRIAE_CS42_5DL_TGACv1_438172_AA1467960.2};
TRINITY_DN92314_c0_g1_i1	tr|M8CAE8|M8CAE8_AEGTA	130	2.6e-52	213.4	99.2	M8CAE8_AEGTA	Uncharacterized protein	SubName: Full=Uncharacterized protein {ECO:0000313|EMBL:EMT12108.1, ECO:0000313|EnsemblPlants:EMT12108};
TRINITY_DN92339_c0_g1_i1	tr|M8BDB3|M8BDB3_AEGTA	65	2.1e-06	60.8	50.1	M8BDB3_AEGTA	Uncharacterized protein	SubName: Full=Uncharacterized protein {ECO:0000313|EMBL:EMT11665.1, ECO:0000313|EnsemblPlants:EMT11665};
TRINITY_DN92339_c0_g2_i1	tr|A0A1D6AKP0|A0A1D6AKP0_WHEAT	24	0.00026	53.5	25	A0A1D6AKP0_WHEAT	Uncharacterized protein	SubName: Full=Uncharacterized protein {ECO:0000313|EnsemblPlants:TRIAE_CS42_6BL_TGACv1_499418_AA1581980.3};
TRINITY_DN92369_c0_g1_i1	tr|T1LPY1|T1LPY1_TRIUA	145	2.1e-74	287	99.5	T1LPY1_TRIUA	Uncharacterized protein	SubName: Full=Uncharacterized protein {ECO:0000313|EnsemblPlants:TRIUR3_06946-P1};
TRINITY_DN92307_c0_g2_i2	tr|M8D948|M8D948_AEGTA	45	5.9e-12	80.1	20.2	M8D948_AEGTA	Uncharacterized protein	SubName: Full=Uncharacterized protein {ECO:0000313|EMBL:EMT33056.1, ECO:0000313|EnsemblPlants:EMT33056};
TRINITY_DN92307_c0_g2_i6	tr|M8D948|M8D948_AEGTA	45	6.5e-12	80.1	18.4	M8D948_AEGTA	Uncharacterized protein	SubName: Full=Uncharacterized protein {ECO:0000313|EMBL:EMT33056.1, ECO:0000313|EnsemblPlants:EMT33056};
TRINITY_DN92307_c0_g2_i10	tr|M8D948|M8D948_AEGTA	45	4e-12	80.1	29.7	M8D948_AEGTA	Uncharacterized protein	SubName: Full=Uncharacterized protein {ECO:0000313|EMBL:EMT33056.1, ECO:0000313|EnsemblPlants:EMT33056};
TRINITY_DN92307_c1_g1_i1	tr|T1MMT6|T1MMT6_TRIUA	86	6.1e-21	108.6	97.3	T1MMT6_TRIUA	Uncharacterized protein	SubName: Full=Uncharacterized protein {ECO:0000313|EnsemblPlants:TRIUR3_19148-P1};
TRINITY_DN92307_c1_g2_i1	tr|R7VZN6|R7VZN6_AEGTA	44	1.7e-12	80.5	52.8	R7VZN6_AEGTA	Pentatricopeptide repeat-containing protein	SubName: Full=Pentatricopeptide repeat-containing protein {ECO:0000313|EMBL:EMT01969.1, ECO:0000313|EnsemblPlants:EMT01969};
TRINITY_DN92307_c2_g1_i1	tr|A0A1D5YZ48|A0A1D5YZ48_WHEAT	98	1.6e-44	187.2	91.6	A0A1D5YZ48_WHEAT	Uncharacterized protein	SubName: Full=Uncharacterized protein {ECO:0000313|EnsemblPlants:TRIAE_CS42_5BL_TGACv1_404374_AA1297300.1};
TRINITY_DN92353_c0_g1_i2	tr|M0WL09|M0WL09_HORVV	89	1.9e-38	166.8	99.3	M0WL09_HORVV	Uncharacterized protein	SubName: Full=Uncharacterized protein {ECO:0000313|EnsemblPlants:HORVU7Hr1G114880.3};
TRINITY_DN92353_c0_g1_i1	tr|M0WL09|M0WL09_HORVV	93	1.1e-39	171	98.9	M0WL09_HORVV	Uncharacterized protein	SubName: Full=Uncharacterized protein {ECO:0000313|EnsemblPlants:HORVU7Hr1G114880.3};
TRINITY_DN92399_c0_g2_i1	tr|M8A8Y0|M8A8Y0_TRIUA	56	2.2e-18	99.8	81.6	M8A8Y0_TRIUA	Uncharacterized protein	SubName: Full=Uncharacterized protein {ECO:0000313|EMBL:EMS68962.1, ECO:0000313|EnsemblPlants:TRIUR3_32864-P1};
TRINITY_DN92334_c0_g1_i1	tr|A0A1D5UEX2|A0A1D5UEX2_WHEAT	115	5.2e-36	159.5	75.5	A0A1D5UEX2_WHEAT	Uncharacterized protein	SubName: Full=Uncharacterized protein {ECO:0000313|EnsemblPlants:TRIAE_CS42_2BS_TGACv1_148336_AA0492350.1};
TRINITY_DN92317_c0_g1_i1	tr|A0A0D9XB00|A0A0D9XB00_9ORYZ	68	4.3e-12	79	91.4	A0A0D9XB00_9ORYZ	Uncharacterized protein	SubName: Full=Uncharacterized protein {ECO:0000313|EnsemblPlants:LPERR08G20610.1};
TRINITY_DN92354_c0_g1_i2	tr|A0A1D5VMP9|A0A1D5VMP9_WHEAT	33	1.2e-07	64.3	41.8	A0A1D5VMP9_WHEAT	Uncharacterized protein	SubName: Full=Uncharacterized protein {ECO:0000313|EnsemblPlants:TRIAE_CS42_3AS_TGACv1_213819_AA0707960.1};
TRINITY_DN92315_c0_g1_i1	tr|A0A1D5UB20|A0A1D5UB20_WHEAT	59	3.3e-27	130.2	39.8	A0A1D5UB20_WHEAT	Uncharacterized protein	SubName: Full=Uncharacterized protein {ECO:0000313|EnsemblPlants:TRIAE_CS42_2BS_TGACv1_146759_AA0472170.1};
TRINITY_DN92313_c0_g1_i1	tr|A0A1D6CZI2|A0A1D6CZI2_WHEAT	72	3.6e-18	99.4	85.7	A0A1D6CZI2_WHEAT	Uncharacterized protein	SubName: Full=Uncharacterized protein {ECO:0000313|EnsemblPlants:TRIAE_CS42_7DS_TGACv1_622163_AA2034260.1};
TRINITY_DN92376_c0_g1_i1	tr|A0A287UFR7|A0A287UFR7_HORVV	25	8.9e-07	61.2	35.7	A0A287UFR7_HORVV	Uncharacterized protein	SubName: Full=Uncharacterized protein {ECO:0000313|EnsemblPlants:HORVU6Hr1G064150.17};
TRINITY_DN92376_c0_g2_i2	tr|M7YXM2|M7YXM2_TRIUA	41	8.2e-06	60.1	14.2	M7YXM2_TRIUA	Mitogen-activated protein kinase kinase kinase ANP1	SubName: Full=Mitogen-activated protein kinase kinase kinase ANP1 {ECO:0000313|EMBL:EMS51921.1, ECO:0000313|EnsemblPlants:TRIUR3_19028-P1};
TRINITY_DN92342_c0_g1_i2	tr|M7ZFD0|M7ZFD0_TRIUA	66	3.3e-24	120.2	45.8	M7ZFD0_TRIUA	Uncharacterized protein	SubName: Full=Uncharacterized protein {ECO:0000313|EMBL:EMS61923.1, ECO:0000313|EnsemblPlants:TRIUR3_32653-P1};
TRINITY_DN92342_c0_g1_i3	tr|M7ZFD0|M7ZFD0_TRIUA	66	3.1e-24	120.2	49	M7ZFD0_TRIUA	Uncharacterized protein	SubName: Full=Uncharacterized protein {ECO:0000313|EMBL:EMS61923.1, ECO:0000313|EnsemblPlants:TRIUR3_32653-P1};
TRINITY_DN92342_c1_g1_i2	tr|T1N4D5|T1N4D5_TRIUA	58	2.3e-18	99.8	82.1	T1N4D5_TRIUA	Uncharacterized protein	SubName: Full=Uncharacterized protein {ECO:0000313|EnsemblPlants:TRIUR3_25266-P1};
TRINITY_DN92342_c1_g1_i1	tr|T1N4D5|T1N4D5_TRIUA	60	1.2e-19	104	87.8	T1N4D5_TRIUA	Uncharacterized protein	SubName: Full=Uncharacterized protein {ECO:0000313|EnsemblPlants:TRIUR3_25266-P1};
TRINITY_DN92382_c0_g1_i1	tr|M0W0S6|M0W0S6_HORVV	40	7e-13	81.6	51.7	M0W0S6_HORVV	Uncharacterized protein	SubName: Full=Uncharacterized protein {ECO:0000313|EnsemblPlants:HORVU5Hr1G062370.9};
TRINITY_DN92321_c0_g1_i1	tr|A0A1D6CDI7|A0A1D6CDI7_WHEAT	410	2e-227	797	87.4	A0A1D6CDI7_WHEAT	Uncharacterized protein	SubName: Full=Uncharacterized protein {ECO:0000313|EnsemblPlants:TRIAE_CS42_7BS_TGACv1_591796_AA1921520.1};
TRINITY_DN92321_c0_g1_i6	tr|A0A1D6CDI7|A0A1D6CDI7_WHEAT	370	2.5e-199	703.4	93.7	A0A1D6CDI7_WHEAT	Uncharacterized protein	SubName: Full=Uncharacterized protein {ECO:0000313|EnsemblPlants:TRIAE_CS42_7BS_TGACv1_591796_AA1921520.1};
TRINITY_DN92321_c0_g1_i3	tr|A0A1D6CDI7|A0A1D6CDI7_WHEAT	409	1.1e-223	784.6	78.8	A0A1D6CDI7_WHEAT	Uncharacterized protein	SubName: Full=Uncharacterized protein {ECO:0000313|EnsemblPlants:TRIAE_CS42_7BS_TGACv1_591796_AA1921520.1};
TRINITY_DN92321_c0_g2_i1	tr|A0A1D6CDI7|A0A1D6CDI7_WHEAT	113	1.3e-37	164.9	69.9	A0A1D6CDI7_WHEAT	Uncharacterized protein	SubName: Full=Uncharacterized protein {ECO:0000313|EnsemblPlants:TRIAE_CS42_7BS_TGACv1_591796_AA1921520.1};
TRINITY_DN92301_c0_g1_i2	tr|A0A1D5TU65|A0A1D5TU65_WHEAT	129	1.2e-52	214.5	93.3	A0A1D5TU65_WHEAT	Uncharacterized protein	SubName: Full=Uncharacterized protein {ECO:0000313|EnsemblPlants:TRIAE_CS42_2BL_TGACv1_129452_AA0384450.1};
TRINITY_DN92301_c0_g1_i8	tr|A0A1D6C192|A0A1D6C192_WHEAT	129	1.6e-55	224.2	89.3	A0A1D6C192_WHEAT	Uncharacterized protein	SubName: Full=Uncharacterized protein {ECO:0000313|EnsemblPlants:TRIAE_CS42_7AS_TGACv1_571861_AA1850350.1};
TRINITY_DN92301_c0_g1_i9	tr|A0A1D5TU65|A0A1D5TU65_WHEAT	129	1.7e-63	250.8	85.6	A0A1D5TU65_WHEAT	Uncharacterized protein	SubName: Full=Uncharacterized protein {ECO:0000313|EnsemblPlants:TRIAE_CS42_2BL_TGACv1_129452_AA0384450.1};
TRINITY_DN92301_c0_g1_i3	tr|A0A1D6D652|A0A1D6D652_WHEAT	129	1.4e-65	257.7	87.8	A0A1D6D652_WHEAT	Uncharacterized protein	SubName: Full=Uncharacterized protein {ECO:0000313|EnsemblPlants:TRIAE_CS42_7DS_TGACv1_626230_AA2066490.1};
TRINITY_DN92301_c0_g1_i6	tr|A0A1D6C192|A0A1D6C192_WHEAT	129	6.1e-66	258.8	87.8	A0A1D6C192_WHEAT	Uncharacterized protein	SubName: Full=Uncharacterized protein {ECO:0000313|EnsemblPlants:TRIAE_CS42_7AS_TGACv1_571861_AA1850350.1};
TRINITY_DN92301_c0_g1_i4	tr|A0A1D5X3F4|A0A1D5X3F4_WHEAT	130	1.5e-65	257.7	78	A0A1D5X3F4_WHEAT	Uncharacterized protein	SubName: Full=Uncharacterized protein {ECO:0000313|EnsemblPlants:TRIAE_CS42_4AL_TGACv1_289363_AA0969740.1};
TRINITY_DN92301_c0_g1_i7	tr|F2D7D8|F2D7D8_HORVV	79	1.8e-30	140.2	92.2	F2D7D8_HORVV	Predicted protein	SubName: Full=Predicted protein {ECO:0000313|EMBL:BAJ91009.1};
TRINITY_DN92311_c0_g1_i1	tr|A0A1D5S300|A0A1D5S300_WHEAT	41	4.8e-12	79.3	38.6	A0A1D5S300_WHEAT	Uncharacterized protein	SubName: Full=Uncharacterized protein {ECO:0000313|EnsemblPlants:TRIAE_CS42_1AS_TGACv1_019646_AA0069490.1};
TRINITY_DN92311_c0_g1_i2	tr|A0A1D5S300|A0A1D5S300_WHEAT	41	7.4e-13	82	38.6	A0A1D5S300_WHEAT	Uncharacterized protein	SubName: Full=Uncharacterized protein {ECO:0000313|EnsemblPlants:TRIAE_CS42_1AS_TGACv1_019646_AA0069490.1};
TRINITY_DN42005_c0_g1_i3	tr|M8BWB6|M8BWB6_AEGTA	42	5.6e-14	85.9	36.1	M8BWB6_AEGTA	Vacuolar protein sorting-associated 2-1-like protein	SubName: Full=Vacuolar protein sorting-associated 2-1-like protein {ECO:0000313|EMBL:EMT29285.1, ECO:0000313|EnsemblPlants:EMT29285};
TRINITY_DN42013_c0_g1_i1	tr|A0A1D5SC55|A0A1D5SC55_WHEAT	246	2.9e-113	416.8	99.9	A0A1D5SC55_WHEAT	Uncharacterized protein	SubName: Full=Uncharacterized protein {ECO:0000313|EnsemblPlants:TRIAE_CS42_1BL_TGACv1_031609_AA0117090.2};
TRINITY_DN42013_c0_g1_i4	tr|A0A1D5SC55|A0A1D5SC55_WHEAT	200	1.4e-87	331.6	74.6	A0A1D5SC55_WHEAT	Uncharacterized protein	SubName: Full=Uncharacterized protein {ECO:0000313|EnsemblPlants:TRIAE_CS42_1BL_TGACv1_031609_AA0117090.2};
TRINITY_DN42013_c0_g1_i7	tr|A0A1D6DBZ4|A0A1D6DBZ4_WHEAT	1026	0	1875.1	96.2	A0A1D6DBZ4_WHEAT	Uncharacterized protein	SubName: Full=Uncharacterized protein {ECO:0000313|EnsemblPlants:TRIAE_CS42_U_TGACv1_641545_AA2097650.3};
TRINITY_DN42013_c0_g1_i3	tr|A0A1D6DBZ3|A0A1D6DBZ3_WHEAT	1115	0	1900.2	97.5	A0A1D6DBZ3_WHEAT	Uncharacterized protein	SubName: Full=Uncharacterized protein {ECO:0000313|EnsemblPlants:TRIAE_CS42_U_TGACv1_641545_AA2097650.2};
TRINITY_DN42013_c0_g1_i2	tr|A0A1D6DBZ3|A0A1D6DBZ3_WHEAT	1143	0	1885.2	97.6	A0A1D6DBZ3_WHEAT	Uncharacterized protein	SubName: Full=Uncharacterized protein {ECO:0000313|EnsemblPlants:TRIAE_CS42_U_TGACv1_641545_AA2097650.2};
TRINITY_DN42013_c0_g2_i1	tr|M8AI08|M8AI08_TRIUA	95	1.8e-32	147.5	59.7	M8AI08_TRIUA	Putative glucose-6-phosphate 1-epimerase	SubName: Full=Putative glucose-6-phosphate 1-epimerase {ECO:0000313|EMBL:EMS60394.1, ECO:0000313|EnsemblPlants:TRIUR3_31950-P1};
TRINITY_DN42055_c0_g3_i1	tr|M7ZTC7|M7ZTC7_TRIUA	52	1e-08	68.2	53.1	M7ZTC7_TRIUA	Tryptophanyl-tRNA synthetase, cytoplasmic	SubName: Full=Tryptophanyl-tRNA synthetase, cytoplasmic {ECO:0000313|EMBL:EMS55590.1, ECO:0000313|EnsemblPlants:TRIUR3_17018-P1};
TRINITY_DN42055_c0_g3_i2	tr|M7ZTC7|M7ZTC7_TRIUA	57	4.1e-09	69.3	65.3	M7ZTC7_TRIUA	Tryptophanyl-tRNA synthetase, cytoplasmic	SubName: Full=Tryptophanyl-tRNA synthetase, cytoplasmic {ECO:0000313|EMBL:EMS55590.1, ECO:0000313|EnsemblPlants:TRIUR3_17018-P1};
TRINITY_DN42055_c0_g4_i3	tr|M7ZTC7|M7ZTC7_TRIUA	48	2e-13	84.3	33.2	M7ZTC7_TRIUA	Tryptophanyl-tRNA synthetase, cytoplasmic	SubName: Full=Tryptophanyl-tRNA synthetase, cytoplasmic {ECO:0000313|EMBL:EMS55590.1, ECO:0000313|EnsemblPlants:TRIUR3_17018-P1};
TRINITY_DN42055_c0_g4_i1	tr|T1NCD8|T1NCD8_TRIUA	57	4.2e-07	62.8	57.9	T1NCD8_TRIUA	Uncharacterized protein	SubName: Full=Uncharacterized protein {ECO:0000313|EnsemblPlants:TRIUR3_28198-P1};
TRINITY_DN42055_c0_g4_i4	tr|T1NCD8|T1NCD8_TRIUA	56	1.1e-15	91.3	57.9	T1NCD8_TRIUA	Uncharacterized protein	SubName: Full=Uncharacterized protein {ECO:0000313|EnsemblPlants:TRIUR3_28198-P1};
TRINITY_DN42025_c0_g1_i4	tr|A0A1D5VT22|A0A1D5VT22_WHEAT	50	1.8e-20	107.5	42.1	A0A1D5VT22_WHEAT	Uncharacterized protein	SubName: Full=Uncharacterized protein {ECO:0000313|EnsemblPlants:TRIAE_CS42_3B_TGACv1_221278_AA0736050.1};
TRINITY_DN42025_c0_g1_i8	tr|A0A1D5V5B7|A0A1D5V5B7_WHEAT	175	6.6e-91	342.4	75.8	A0A1D5V5B7_WHEAT	Uncharacterized protein	SubName: Full=Uncharacterized protein {ECO:0000313|EnsemblPlants:TRIAE_CS42_3AL_TGACv1_193835_AA0620500.1};
TRINITY_DN42025_c0_g1_i3	tr|A0A1D5V5B7|A0A1D5V5B7_WHEAT	175	3.1e-66	260.4	74.1	A0A1D5V5B7_WHEAT	Uncharacterized protein	SubName: Full=Uncharacterized protein {ECO:0000313|EnsemblPlants:TRIAE_CS42_3AL_TGACv1_193835_AA0620500.1};
TRINITY_DN42025_c0_g1_i6	tr|A0A1D5VT22|A0A1D5VT22_WHEAT	174	1.1e-90	341.7	75.7	A0A1D5VT22_WHEAT	Uncharacterized protein	SubName: Full=Uncharacterized protein {ECO:0000313|EnsemblPlants:TRIAE_CS42_3B_TGACv1_221278_AA0736050.1};
TRINITY_DN42025_c0_g1_i7	tr|A0A1D5VT22|A0A1D5VT22_WHEAT	174	9.1e-91	341.7	93.2	A0A1D5VT22_WHEAT	Uncharacterized protein	SubName: Full=Uncharacterized protein {ECO:0000313|EnsemblPlants:TRIAE_CS42_3B_TGACv1_221278_AA0736050.1};
TRINITY_DN42025_c0_g1_i1	tr|A0A1D5VT22|A0A1D5VT22_WHEAT	174	2.9e-89	336.7	93.2	A0A1D5VT22_WHEAT	Uncharacterized protein	SubName: Full=Uncharacterized protein {ECO:0000313|EnsemblPlants:TRIAE_CS42_3B_TGACv1_221278_AA0736050.1};
TRINITY_DN42025_c0_g1_i2	tr|A0A1D5V5B7|A0A1D5V5B7_WHEAT	175	4.1e-91	342.8	93.3	A0A1D5V5B7_WHEAT	Uncharacterized protein	SubName: Full=Uncharacterized protein {ECO:0000313|EnsemblPlants:TRIAE_CS42_3AL_TGACv1_193835_AA0620500.1};
TRINITY_DN42049_c0_g1_i1	tr|W5EP58|W5EP58_WHEAT	50	5.4e-18	99	50.8	W5EP58_WHEAT	Uncharacterized protein	SubName: Full=Uncharacterized protein {ECO:0000313|EnsemblPlants:TRIAE_CS42_4DS_TGACv1_362282_AA1178530.2};
TRINITY_DN42033_c0_g1_i5	tr|A0A096UW30|A0A096UW30_WHEAT	366	1.1e-195	691.8	66.7	A0A096UW30_WHEAT	Uncharacterized protein	SubName: Full=Uncharacterized protein {ECO:0000313|EnsemblPlants:TRIAE_CS42_7DL_TGACv1_602917_AA1971810.1};
TRINITY_DN42033_c0_g1_i3	tr|A0A096UW30|A0A096UW30_WHEAT	145	3.8e-68	267.7	34.1	A0A096UW30_WHEAT	Uncharacterized protein	SubName: Full=Uncharacterized protein {ECO:0000313|EnsemblPlants:TRIAE_CS42_7DL_TGACv1_602917_AA1971810.1};
TRINITY_DN42033_c0_g1_i4	tr|A0A096UW30|A0A096UW30_WHEAT	83	5.9e-37	162.5	57.4	A0A096UW30_WHEAT	Uncharacterized protein	SubName: Full=Uncharacterized protein {ECO:0000313|EnsemblPlants:TRIAE_CS42_7DL_TGACv1_602917_AA1971810.1};
TRINITY_DN42033_c0_g1_i2	tr|A0A096UW30|A0A096UW30_WHEAT	366	1.1e-195	691.8	63.9	A0A096UW30_WHEAT	Uncharacterized protein	SubName: Full=Uncharacterized protein {ECO:0000313|EnsemblPlants:TRIAE_CS42_7DL_TGACv1_602917_AA1971810.1};
TRINITY_DN42033_c0_g1_i6	tr|A0A096UW30|A0A096UW30_WHEAT	145	5.2e-68	267.7	25.2	A0A096UW30_WHEAT	Uncharacterized protein	SubName: Full=Uncharacterized protein {ECO:0000313|EnsemblPlants:TRIAE_CS42_7DL_TGACv1_602917_AA1971810.1};
TRINITY_DN42033_c0_g1_i1	tr|A0A096UW30|A0A096UW30_WHEAT	245	1.2e-125	458.8	54.7	A0A096UW30_WHEAT	Uncharacterized protein	SubName: Full=Uncharacterized protein {ECO:0000313|EnsemblPlants:TRIAE_CS42_7DL_TGACv1_602917_AA1971810.1};
TRINITY_DN42021_c0_g1_i2	tr|A0A1D6AWJ2|A0A1D6AWJ2_WHEAT	23	0.00022	54.3	15.9	A0A1D6AWJ2_WHEAT	Uncharacterized protein	SubName: Full=Uncharacterized protein {ECO:0000313|EnsemblPlants:TRIAE_CS42_6BS_TGACv1_513492_AA1643330.1};
TRINITY_DN42021_c0_g1_i3	tr|A0A1D6AWJ2|A0A1D6AWJ2_WHEAT	23	0.0002	54.7	13.7	A0A1D6AWJ2_WHEAT	Uncharacterized protein	SubName: Full=Uncharacterized protein {ECO:0000313|EnsemblPlants:TRIAE_CS42_6BS_TGACv1_513492_AA1643330.1};
TRINITY_DN42021_c0_g2_i1	tr|A0A287MIW7|A0A287MIW7_HORVV	32	1.6e-06	63.2	6.6	A0A287MIW7_HORVV	Uncharacterized protein	SubName: Full=Uncharacterized protein {ECO:0000313|EnsemblPlants:HORVU3Hr1G104600.29};
TRINITY_DN42021_c0_g2_i3	tr|A0A287MIW7|A0A287MIW7_HORVV	32	1.2e-06	63.2	9	A0A287MIW7_HORVV	Uncharacterized protein	SubName: Full=Uncharacterized protein {ECO:0000313|EnsemblPlants:HORVU3Hr1G104600.29};
TRINITY_DN42021_c0_g2_i2	tr|A0A287MIW7|A0A287MIW7_HORVV	32	1.6e-06	63.2	6.8	A0A287MIW7_HORVV	Uncharacterized protein	SubName: Full=Uncharacterized protein {ECO:0000313|EnsemblPlants:HORVU3Hr1G104600.29};
TRINITY_DN42021_c2_g1_i1	tr|M8BRX6|M8BRX6_AEGTA	90	9.5e-36	159.5	32.7	M8BRX6_AEGTA	70 kDa peptidyl-prolyl isomerase	SubName: Full=70 kDa peptidyl-prolyl isomerase {ECO:0000313|EMBL:EMT05712.1, ECO:0000313|EnsemblPlants:EMT05712};
TRINITY_DN42021_c3_g1_i1	tr|A0A199V7B9|A0A199V7B9_ANACO	28	0.00012	54.3	35.7	A0A199V7B9_ANACO	Uncharacterized protein	SubName: Full=Uncharacterized protein {ECO:0000313|EMBL:OAY72974.1};
TRINITY_DN42054_c0_g1_i2	tr|A0A1D6RGU0|A0A1D6RGU0_WHEAT	107	9.7e-45	188	99.4	A0A1D6RGU0_WHEAT	Uncharacterized protein	SubName: Full=Uncharacterized protein {ECO:0000313|EnsemblPlants:TRIAE_CS42_1DS_TGACv1_080396_AA0247320.9};
TRINITY_DN42054_c0_g1_i5	tr|A0A1D5SKK3|A0A1D5SKK3_WHEAT	80	1.5e-34	153.7	99.2	A0A1D5SKK3_WHEAT	Uncharacterized protein	SubName: Full=Uncharacterized protein {ECO:0000313|EnsemblPlants:TRIAE_CS42_1BS_TGACv1_049801_AA0161750.2};
TRINITY_DN42054_c0_g1_i3	tr|E9P785|E9P785_TRIMO	120	1.8e-50	207.2	96.3	E9P785_TRIMO	Mla1	SubName: Full=Mla1 {ECO:0000313|EMBL:ADX06722.1};
TRINITY_DN42054_c0_g1_i4	tr|A0A1D6DHE4|A0A1D6DHE4_WHEAT	103	9.9e-47	194.5	99.4	A0A1D6DHE4_WHEAT	Uncharacterized protein	SubName: Full=Uncharacterized protein {ECO:0000313|EnsemblPlants:TRIAE_CS42_U_TGACv1_642958_AA2125390.1};
TRINITY_DN42054_c0_g1_i1	tr|M7YIN9|M7YIN9_TRIUA	103	5.8e-47	195.3	99.4	M7YIN9_TRIUA	Disease resistance protein RPP13	SubName: Full=Disease resistance protein RPP13 {ECO:0000313|EMBL:EMS50303.1, ECO:0000313|EnsemblPlants:TRIUR3_15660-P1};
TRINITY_DN42054_c0_g1_i6	tr|A0A0S2LJA1|A0A0S2LJA1_SECCE	94	1e-37	164.5	99.6	A0A0S2LJA1_SECCE	RGA1-E	SubName: Full=RGA1-E {ECO:0000313|EMBL:ALO61078.1};
TRINITY_DN42029_c0_g1_i1	tr|A0A1B0RY43|A0A1B0RY43_WHEAT	166	3.4e-75	290.4	62.7	A0A1B0RY43_WHEAT	SnTox1 sensitivity protein	SubName: Full=SnTox1 sensitivity protein {ECO:0000313|EMBL:ALA50715.1};
TRINITY_DN42029_c0_g1_i4	tr|W5GW68|W5GW68_WHEAT	68	5.3e-36	158.3	98.6	W5GW68_WHEAT	Uncharacterized protein	SubName: Full=Uncharacterized protein {ECO:0000313|EnsemblPlants:TRIAE_CS42_6DL_TGACv1_526541_AA1686520.1};
TRINITY_DN42016_c0_g1_i14	tr|A0A1D5VV78|A0A1D5VV78_WHEAT	37	1e-06	63.2	12.2	A0A1D5VV78_WHEAT	Uncharacterized protein	SubName: Full=Uncharacterized protein {ECO:0000313|EnsemblPlants:TRIAE_CS42_3B_TGACv1_221623_AA0746110.1};
TRINITY_DN42016_c1_g1_i1	tr|M8AYS3|M8AYS3_AEGTA	53	1.9e-05	57	68.5	M8AYS3_AEGTA	Uncharacterized protein	SubName: Full=Uncharacterized protein {ECO:0000313|EMBL:EMT09632.1, ECO:0000313|EnsemblPlants:EMT09632};
TRINITY_DN42002_c1_g1_i1	tr|C5Z2Y1|C5Z2Y1_SORBI	58	9.6e-10	72.8	23.7	C5Z2Y1_SORBI	Uncharacterized protein	SubName: Full=Uncharacterized protein {ECO:0000313|EMBL:EER87756.1};
TRINITY_DN42041_c0_g1_i1	tr|A0A1J3FLK3|A0A1J3FLK3_NOCCA	137	9.7e-48	198.4	93.4	A0A1J3FLK3_NOCCA	60S ribosomal protein L32	SubName: Full=60S ribosomal protein L32 {ECO:0000313|EMBL:JAU44994.1}; Flags: Fragment;
TRINITY_DN42041_c1_g1_i1	tr|L8GXK0|L8GXK0_ACACA	90	1e-29	137.9	94.4	L8GXK0_ACACA	Ribosomal protein L32, putative	SubName: Full=Ribosomal protein L32, putative {ECO:0000313|EMBL:ELR16811.1};
TRINITY_DN42024_c0_g1_i3	tr|M8A129|M8A129_TRIUA	29	0.00063	53.9	9.4	M8A129_TRIUA	Uncharacterized protein	SubName: Full=Uncharacterized protein {ECO:0000313|EMBL:EMS58350.1, ECO:0000313|EnsemblPlants:TRIUR3_09660-P1};
TRINITY_DN42024_c0_g1_i1	tr|M8A129|M8A129_TRIUA	29	0.0007	53.9	8.4	M8A129_TRIUA	Uncharacterized protein	SubName: Full=Uncharacterized protein {ECO:0000313|EMBL:EMS58350.1, ECO:0000313|EnsemblPlants:TRIUR3_09660-P1};
TRINITY_DN42024_c0_g1_i2	tr|M8A129|M8A129_TRIUA	47	1.8e-15	92.4	13.6	M8A129_TRIUA	Uncharacterized protein	SubName: Full=Uncharacterized protein {ECO:0000313|EMBL:EMS58350.1, ECO:0000313|EnsemblPlants:TRIUR3_09660-P1};
TRINITY_DN42037_c0_g1_i1	tr|M8B0I2|M8B0I2_TRIUA	79	1.4e-09	71.2	68.3	M8B0I2_TRIUA	Uncharacterized protein	SubName: Full=Uncharacterized protein {ECO:0000313|EMBL:EMS66974.1, ECO:0000313|EnsemblPlants:TRIUR3_21361-P1};
TRINITY_DN42052_c0_g1_i2	tr|M8BBW5|M8BBW5_AEGTA	27	4.4e-05	57.4	11.2	M8BBW5_AEGTA	Uncharacterized protein	SubName: Full=Uncharacterized protein {ECO:0000313|EMBL:EMT22365.1, ECO:0000313|EnsemblPlants:EMT22365};
TRINITY_DN42052_c0_g1_i4	tr|M8BBW5|M8BBW5_AEGTA	27	3.5e-05	57.4	14.2	M8BBW5_AEGTA	Uncharacterized protein	SubName: Full=Uncharacterized protein {ECO:0000313|EMBL:EMT22365.1, ECO:0000313|EnsemblPlants:EMT22365};
TRINITY_DN42052_c0_g1_i6	tr|M8BBW5|M8BBW5_AEGTA	27	3.7e-05	57.4	13.3	M8BBW5_AEGTA	Uncharacterized protein	SubName: Full=Uncharacterized protein {ECO:0000313|EMBL:EMT22365.1, ECO:0000313|EnsemblPlants:EMT22365};
TRINITY_DN42052_c0_g1_i1	tr|M8BBW5|M8BBW5_AEGTA	27	5e-05	57.4	9.9	M8BBW5_AEGTA	Uncharacterized protein	SubName: Full=Uncharacterized protein {ECO:0000313|EMBL:EMT22365.1, ECO:0000313|EnsemblPlants:EMT22365};
TRINITY_DN42052_c0_g2_i2	tr|M8B9T4|M8B9T4_AEGTA	26	3.7e-07	64.7	8	M8B9T4_AEGTA	Putative pentatricopeptide repeat-containing protein	SubName: Full=Putative pentatricopeptide repeat-containing protein {ECO:0000313|EMBL:EMT21590.1, ECO:0000313|EnsemblPlants:EMT21590};
TRINITY_DN42052_c0_g2_i1	tr|M8B9T4|M8B9T4_AEGTA	26	3.7e-07	64.7	8	M8B9T4_AEGTA	Putative pentatricopeptide repeat-containing protein	SubName: Full=Putative pentatricopeptide repeat-containing protein {ECO:0000313|EMBL:EMT21590.1, ECO:0000313|EnsemblPlants:EMT21590};
TRINITY_DN42009_c0_g1_i5	tr|M7YE83|M7YE83_TRIUA	54	3e-19	104.4	23.7	M7YE83_TRIUA	Uncharacterized protein	SubName: Full=Uncharacterized protein {ECO:0000313|EMBL:EMS48638.1, ECO:0000313|EnsemblPlants:TRIUR3_26742-P1};
TRINITY_DN42009_c0_g1_i1	tr|A0A1D6A0J3|A0A1D6A0J3_WHEAT	53	2.9e-19	104.4	24.4	A0A1D6A0J3_WHEAT	Uncharacterized protein	SubName: Full=Uncharacterized protein {ECO:0000313|EnsemblPlants:TRIAE_CS42_5DS_TGACv1_456573_AA1474350.1};
TRINITY_DN42009_c0_g1_i4	tr|M7YE83|M7YE83_TRIUA	54	3.1e-19	104.4	22.6	M7YE83_TRIUA	Uncharacterized protein	SubName: Full=Uncharacterized protein {ECO:0000313|EMBL:EMS48638.1, ECO:0000313|EnsemblPlants:TRIUR3_26742-P1};
TRINITY_DN42009_c0_g1_i2	tr|M7YE83|M7YE83_TRIUA	54	2.9e-19	104.4	24.9	M7YE83_TRIUA	Uncharacterized protein	SubName: Full=Uncharacterized protein {ECO:0000313|EMBL:EMS48638.1, ECO:0000313|EnsemblPlants:TRIUR3_26742-P1};
TRINITY_DN42009_c1_g1_i3	tr|M8AR28|M8AR28_AEGTA	86	7.6e-41	175.3	68.3	M8AR28_AEGTA	Ankyrin-3	SubName: Full=Ankyrin-3 {ECO:0000313|EMBL:EMT03859.1, ECO:0000313|EnsemblPlants:EMT03859};
TRINITY_DN42009_c1_g1_i1	tr|A0A1D6A095|A0A1D6A095_WHEAT	40	2.3e-11	76.6	50	A0A1D6A095_WHEAT	Uncharacterized protein	SubName: Full=Uncharacterized protein {ECO:0000313|EnsemblPlants:TRIAE_CS42_5DS_TGACv1_456530_AA1473160.1};
TRINITY_DN42095_c0_g1_i1	tr|A0A1D6C4L3|A0A1D6C4L3_WHEAT	49	2.2e-20	106.7	59	A0A1D6C4L3_WHEAT	Uncharacterized protein	SubName: Full=Uncharacterized protein {ECO:0000313|EnsemblPlants:TRIAE_CS42_7BL_TGACv1_577281_AA1871220.1};
TRINITY_DN42079_c0_g1_i8	tr|A0A0D9UXX9|A0A0D9UXX9_9ORYZ	55	7.7e-11	77.4	12.3	A0A0D9UXX9_9ORYZ	Uncharacterized protein	SubName: Full=Uncharacterized protein {ECO:0000313|EnsemblPlants:LPERR01G05930.1};
TRINITY_DN42079_c0_g1_i4	tr|A0A0D9UXX9|A0A0D9UXX9_9ORYZ	55	7.2e-11	77.4	13.2	A0A0D9UXX9_9ORYZ	Uncharacterized protein	SubName: Full=Uncharacterized protein {ECO:0000313|EnsemblPlants:LPERR01G05930.1};
TRINITY_DN42079_c0_g1_i6	tr|A0A0D9UXX9|A0A0D9UXX9_9ORYZ	55	8.1e-11	77.4	11.7	A0A0D9UXX9_9ORYZ	Uncharacterized protein	SubName: Full=Uncharacterized protein {ECO:0000313|EnsemblPlants:LPERR01G05930.1};
TRINITY_DN42079_c0_g1_i12	tr|A0A0D9UXX9|A0A0D9UXX9_9ORYZ	55	7.6e-11	77.4	12.5	A0A0D9UXX9_9ORYZ	Uncharacterized protein	SubName: Full=Uncharacterized protein {ECO:0000313|EnsemblPlants:LPERR01G05930.1};
TRINITY_DN42046_c0_g1_i3	tr|M8BS75|M8BS75_AEGTA	126	1.7e-21	111.7	62.5	M8BS75_AEGTA	Uncharacterized protein	SubName: Full=Uncharacterized protein {ECO:0000313|EMBL:EMT27835.1, ECO:0000313|EnsemblPlants:EMT27835};
TRINITY_DN42046_c0_g1_i2	tr|M8BS75|M8BS75_AEGTA	69	1e-15	92.4	34.1	M8BS75_AEGTA	Uncharacterized protein	SubName: Full=Uncharacterized protein {ECO:0000313|EMBL:EMT27835.1, ECO:0000313|EnsemblPlants:EMT27835};
TRINITY_DN42046_c2_g1_i1	tr|M8BS75|M8BS75_AEGTA	56	8.8e-11	74.7	70.3	M8BS75_AEGTA	Uncharacterized protein	SubName: Full=Uncharacterized protein {ECO:0000313|EMBL:EMT27835.1, ECO:0000313|EnsemblPlants:EMT27835};
TRINITY_DN42099_c0_g1_i4	tr|R7W1S3|R7W1S3_AEGTA	71	8.2e-27	128.3	72.7	R7W1S3_AEGTA	Phosphatidate cytidylyltransferase	RecName: Full=Phosphatidate cytidylyltransferase {ECO:0000256|RuleBase:RU003938}; EC=2.7.7.41 {ECO:0000256|RuleBase:RU003938};
TRINITY_DN42099_c0_g1_i3	tr|R7W1S3|R7W1S3_AEGTA	69	4.4e-26	126.7	39	R7W1S3_AEGTA	Phosphatidate cytidylyltransferase	RecName: Full=Phosphatidate cytidylyltransferase {ECO:0000256|RuleBase:RU003938}; EC=2.7.7.41 {ECO:0000256|RuleBase:RU003938};
TRINITY_DN42099_c0_g1_i2	tr|W5A916|W5A916_WHEAT	64	4.3e-26	125.9	61.9	W5A916_WHEAT	Phosphatidate cytidylyltransferase	RecName: Full=Phosphatidate cytidylyltransferase {ECO:0000256|PIRNR:PIRNR018269, ECO:0000256|RuleBase:RU003938}; EC=2.7.7.41 {ECO:0000256|PIRNR:PIRNR018269, ECO:0000256|RuleBase:RU003938};
TRINITY_DN42099_c0_g1_i1	tr|A0A1D5SJ11|A0A1D5SJ11_WHEAT	56	1.3e-24	120.9	58.3	A0A1D5SJ11_WHEAT	Phosphatidate cytidylyltransferase	RecName: Full=Phosphatidate cytidylyltransferase {ECO:0000256|PIRNR:PIRNR018269, ECO:0000256|RuleBase:RU003938}; EC=2.7.7.41 {ECO:0000256|PIRNR:PIRNR018269, ECO:0000256|RuleBase:RU003938};
TRINITY_DN42056_c0_g1_i1	tr|A0A287KD65|A0A287KD65_HORVV	94	1.3e-24	120.9	98.9	A0A287KD65_HORVV	Uncharacterized protein	SubName: Full=Uncharacterized protein {ECO:0000313|EnsemblPlants:HORVU3Hr1G020780.5};
TRINITY_DN42048_c0_g1_i1	tr|A0A1D5YC94|A0A1D5YC94_WHEAT	113	4.1e-56	226.5	63.7	A0A1D5YC94_WHEAT	Uncharacterized protein	SubName: Full=Uncharacterized protein {ECO:0000313|EnsemblPlants:TRIAE_CS42_5AL_TGACv1_374177_AA1192440.4};
TRINITY_DN42048_c2_g1_i1	tr|A0A1D5YC94|A0A1D5YC94_WHEAT	41	3.5e-12	79.7	40.3	A0A1D5YC94_WHEAT	Uncharacterized protein	SubName: Full=Uncharacterized protein {ECO:0000313|EnsemblPlants:TRIAE_CS42_5AL_TGACv1_374177_AA1192440.4};
TRINITY_DN42036_c0_g1_i1	tr|M7Z057|M7Z057_TRIUA	68	4.6e-32	145.2	100	M7Z057_TRIUA	Protein STRUBBELIG-RECEPTOR FAMILY 3	SubName: Full=Protein STRUBBELIG-RECEPTOR FAMILY 3 {ECO:0000313|EMBL:EMS45705.1, ECO:0000313|EnsemblPlants:TRIUR3_08354-P1};
TRINITY_DN42070_c0_g1_i3	tr|A0A1D5ZT99|A0A1D5ZT99_WHEAT	282	4.8e-131	476.5	73.9	A0A1D5ZT99_WHEAT	Uncharacterized protein	SubName: Full=Uncharacterized protein {ECO:0000313|EnsemblPlants:TRIAE_CS42_5DL_TGACv1_434677_AA1439880.1};
TRINITY_DN42003_c0_g1_i6	tr|A0A287Y0D0|A0A287Y0D0_HORVV	105	3.3e-24	119.8	95.5	A0A287Y0D0_HORVV	Uncharacterized protein	SubName: Full=Uncharacterized protein {ECO:0000313|EnsemblPlants:HORVU7Hr1G120450.2};
TRINITY_DN42003_c0_g1_i3	tr|A0A287Y0D0|A0A287Y0D0_HORVV	78	6.4e-28	131.7	94	A0A287Y0D0_HORVV	Uncharacterized protein	SubName: Full=Uncharacterized protein {ECO:0000313|EnsemblPlants:HORVU7Hr1G120450.2};
TRINITY_DN42003_c0_g1_i5	tr|A0A1D6CTP7|A0A1D6CTP7_WHEAT	40	4.2e-13	82.4	51.1	A0A1D6CTP7_WHEAT	Uncharacterized protein	SubName: Full=Uncharacterized protein {ECO:0000313|EnsemblPlants:TRIAE_CS42_7DL_TGACv1_604789_AA2001750.1};
TRINITY_DN42003_c0_g1_i2	tr|A0A1D6CTP7|A0A1D6CTP7_WHEAT	147	5.8e-72	278.9	99.1	A0A1D6CTP7_WHEAT	Uncharacterized protein	SubName: Full=Uncharacterized protein {ECO:0000313|EnsemblPlants:TRIAE_CS42_7DL_TGACv1_604789_AA2001750.1};
TRINITY_DN42003_c0_g1_i4	tr|Q02345|Q02345_HORVU	150	1e-68	268.1	99.1	Q02345_HORVU	(1-3,1-4)-beta-D-glucanase; Glb 1 1-3,1-4-beta-D-glucanase; Lichenase	SubName: Full=(1-3,1-4)-beta-D-glucanase {ECO:0000313|EMBL:CAA36801.1}; SubName: Full=Glb 1 1-3,1-4-beta-D-glucanase {ECO:0000313|EMBL:CAA40094.1}; SubName: Full=Lichenase {ECO:0000313|EMBL:CAB41401.1}; EC=3.2.1.73 {ECO:0000313|EMBL:CAB41401.1};
TRINITY_DN42094_c0_g1_i1	tr|A0A1D6RMV2|A0A1D6RMV2_WHEAT	142	9.4e-72	278.1	99.8	A0A1D6RMV2_WHEAT	Uncharacterized protein	SubName: Full=Uncharacterized protein {ECO:0000313|EnsemblPlants:TRIAE_CS42_2BS_TGACv1_147580_AA0485140.1};
TRINITY_DN42014_c0_g1_i2	tr|B9GKF1|B9GKF1_POPTR	84	7.6e-10	73.2	35.8	B9GKF1_POPTR	DNA repair protein and transcription factor	SubName: Full=DNA repair protein and transcription factor {ECO:0000313|EMBL:EEE84325.2};
TRINITY_DN42014_c0_g1_i1	tr|B9GKF1|B9GKF1_POPTR	81	7.9e-10	73.2	33.3	B9GKF1_POPTR	DNA repair protein and transcription factor	SubName: Full=DNA repair protein and transcription factor {ECO:0000313|EMBL:EEE84325.2};
TRINITY_DN42060_c0_g1_i4	tr|W5H112|W5H112_WHEAT	376	1.4e-207	730.7	99.8	W5H112_WHEAT	Uncharacterized protein	SubName: Full=Uncharacterized protein {ECO:0000313|EnsemblPlants:TRIAE_CS42_6DL_TGACv1_526836_AA1692980.1};
TRINITY_DN42060_c0_g1_i5	tr|A0A1D6D742|A0A1D6D742_WHEAT	147	2e-72	280.4	99.8	A0A1D6D742_WHEAT	Uncharacterized protein	SubName: Full=Uncharacterized protein {ECO:0000313|EnsemblPlants:TRIAE_CS42_U_TGACv1_640763_AA2073110.1};
TRINITY_DN42060_c0_g1_i2	tr|W5H112|W5H112_WHEAT	259	3.3e-146	526.6	84.3	W5H112_WHEAT	Uncharacterized protein	SubName: Full=Uncharacterized protein {ECO:0000313|EnsemblPlants:TRIAE_CS42_6DL_TGACv1_526836_AA1692980.1};
TRINITY_DN42060_c0_g1_i1	tr|A0A1D6A539|A0A1D6A539_WHEAT	88	4.5e-48	198.7	99.6	A0A1D6A539_WHEAT	Uncharacterized protein	SubName: Full=Uncharacterized protein {ECO:0000313|EnsemblPlants:TRIAE_CS42_6AL_TGACv1_470860_AA1496860.1};
TRINITY_DN42060_c0_g1_i3	tr|W5H112|W5H112_WHEAT	122	5.6e-52	212.2	96.3	W5H112_WHEAT	Uncharacterized protein	SubName: Full=Uncharacterized protein {ECO:0000313|EnsemblPlants:TRIAE_CS42_6DL_TGACv1_526836_AA1692980.1};
TRINITY_DN42060_c0_g2_i1	tr|A0A1D5Y3U5|A0A1D5Y3U5_WHEAT	507	7.4e-296	1024.6	86	A0A1D5Y3U5_WHEAT	Uncharacterized protein	SubName: Full=Uncharacterized protein {ECO:0000313|EnsemblPlants:TRIAE_CS42_4DL_TGACv1_345012_AA1151040.1};
TRINITY_DN42060_c0_g2_i3	tr|M8AV98|M8AV98_AEGTA	350	4.3e-193	682.9	73.3	M8AV98_AEGTA	Wall-associated receptor kinase 3	SubName: Full=Wall-associated receptor kinase 3 {ECO:0000313|EMBL:EMT05610.1, ECO:0000313|EnsemblPlants:EMT05610};
TRINITY_DN42060_c0_g2_i2	tr|M8AV98|M8AV98_AEGTA	395	3.2e-221	776.5	72.3	M8AV98_AEGTA	Wall-associated receptor kinase 3	SubName: Full=Wall-associated receptor kinase 3 {ECO:0000313|EMBL:EMT05610.1, ECO:0000313|EnsemblPlants:EMT05610};
TRINITY_DN42060_c0_g3_i1	tr|A0A1D6A539|A0A1D6A539_WHEAT	170	5.4e-98	365.5	99.4	A0A1D6A539_WHEAT	Uncharacterized protein	SubName: Full=Uncharacterized protein {ECO:0000313|EnsemblPlants:TRIAE_CS42_6AL_TGACv1_470860_AA1496860.1};
TRINITY_DN42060_c0_g3_i2	tr|A0A1D6A539|A0A1D6A539_WHEAT	150	2.5e-84	320.1	90.5	A0A1D6A539_WHEAT	Uncharacterized protein	SubName: Full=Uncharacterized protein {ECO:0000313|EnsemblPlants:TRIAE_CS42_6AL_TGACv1_470860_AA1496860.1};
TRINITY_DN42010_c0_g1_i3	tr|A0A1D6AWN8|A0A1D6AWN8_WHEAT	154	1.1e-18	102.4	68.5	A0A1D6AWN8_WHEAT	Uncharacterized protein	SubName: Full=Uncharacterized protein {ECO:0000313|EnsemblPlants:TRIAE_CS42_6BS_TGACv1_513534_AA1644300.1};
TRINITY_DN42010_c0_g1_i1	tr|A0A1D6RVI9|A0A1D6RVI9_WHEAT	176	4.6e-10	73.6	78.5	A0A1D6RVI9_WHEAT	Uncharacterized protein	SubName: Full=Uncharacterized protein {ECO:0000313|EnsemblPlants:TRIAE_CS42_4AS_TGACv1_306384_AA1007360.1};
TRINITY_DN42010_c0_g1_i2	tr|A0A1D6RVI9|A0A1D6RVI9_WHEAT	176	4.6e-10	73.6	79.3	A0A1D6RVI9_WHEAT	Uncharacterized protein	SubName: Full=Uncharacterized protein {ECO:0000313|EnsemblPlants:TRIAE_CS42_4AS_TGACv1_306384_AA1007360.1};
TRINITY_DN42010_c0_g2_i5	tr|A0A1D6RVI9|A0A1D6RVI9_WHEAT	233	8.5e-14	86.3	92.9	A0A1D6RVI9_WHEAT	Uncharacterized protein	SubName: Full=Uncharacterized protein {ECO:0000313|EnsemblPlants:TRIAE_CS42_4AS_TGACv1_306384_AA1007360.1};
TRINITY_DN42010_c0_g2_i3	tr|A0A1D6RVI9|A0A1D6RVI9_WHEAT	231	6.2e-10	73.6	85	A0A1D6RVI9_WHEAT	Uncharacterized protein	SubName: Full=Uncharacterized protein {ECO:0000313|EnsemblPlants:TRIAE_CS42_4AS_TGACv1_306384_AA1007360.1};
TRINITY_DN42010_c0_g2_i6	tr|A0A1D6RVI9|A0A1D6RVI9_WHEAT	41	2.2e-11	77.8	24.3	A0A1D6RVI9_WHEAT	Uncharacterized protein	SubName: Full=Uncharacterized protein {ECO:0000313|EnsemblPlants:TRIAE_CS42_4AS_TGACv1_306384_AA1007360.1};
TRINITY_DN42010_c0_g2_i1	tr|N1QX68|N1QX68_AEGTA	32	1.7e-08	68.6	15.3	N1QX68_AEGTA	Putative WRKY transcription factor 4	SubName: Full=Putative WRKY transcription factor 4 {ECO:0000313|EMBL:EMT16145.1, ECO:0000313|EnsemblPlants:EMT16145};
TRINITY_DN42010_c1_g1_i3	tr|A0A1D5Y0Q3|A0A1D5Y0Q3_WHEAT	215	4.4e-87	329.7	87.4	A0A1D5Y0Q3_WHEAT	Uncharacterized protein	SubName: Full=Uncharacterized protein {ECO:0000313|EnsemblPlants:TRIAE_CS42_4DL_TGACv1_343574_AA1136760.1};
TRINITY_DN42010_c1_g1_i4	tr|A0A1D6B3V5|A0A1D6B3V5_WHEAT	132	9.8e-46	191.8	83.9	A0A1D6B3V5_WHEAT	Uncharacterized protein	SubName: Full=Uncharacterized protein {ECO:0000313|EnsemblPlants:TRIAE_CS42_6DL_TGACv1_526496_AA1685350.1};
TRINITY_DN42010_c1_g1_i1	tr|A0A1D6B3V5|A0A1D6B3V5_WHEAT	131	1.3e-27	131.7	77.8	A0A1D6B3V5_WHEAT	Uncharacterized protein	SubName: Full=Uncharacterized protein {ECO:0000313|EnsemblPlants:TRIAE_CS42_6DL_TGACv1_526496_AA1685350.1};
TRINITY_DN42010_c1_g2_i2	tr|A0A1D5Y0Q3|A0A1D5Y0Q3_WHEAT	93	1.7e-36	162.2	28.4	A0A1D5Y0Q3_WHEAT	Uncharacterized protein	SubName: Full=Uncharacterized protein {ECO:0000313|EnsemblPlants:TRIAE_CS42_4DL_TGACv1_343574_AA1136760.1};
TRINITY_DN42010_c1_g2_i3	tr|A0A1D6B3V5|A0A1D6B3V5_WHEAT	120	4.9e-12	80.5	39.2	A0A1D6B3V5_WHEAT	Uncharacterized protein	SubName: Full=Uncharacterized protein {ECO:0000313|EnsemblPlants:TRIAE_CS42_6DL_TGACv1_526496_AA1685350.1};
TRINITY_DN42010_c1_g2_i1	tr|A0A1D6B3V5|A0A1D6B3V5_WHEAT	43	5.8e-12	78.6	56.8	A0A1D6B3V5_WHEAT	Uncharacterized protein	SubName: Full=Uncharacterized protein {ECO:0000313|EnsemblPlants:TRIAE_CS42_6DL_TGACv1_526496_AA1685350.1};
TRINITY_DN42010_c1_g3_i1	tr|A0A1D6B3V5|A0A1D6B3V5_WHEAT	96	9.6e-36	157.9	100	A0A1D6B3V5_WHEAT	Uncharacterized protein	SubName: Full=Uncharacterized protein {ECO:0000313|EnsemblPlants:TRIAE_CS42_6DL_TGACv1_526496_AA1685350.1};
TRINITY_DN42010_c1_g4_i1	tr|A0A1D6B3V5|A0A1D6B3V5_WHEAT	49	2.8e-13	82.8	70.3	A0A1D6B3V5_WHEAT	Uncharacterized protein	SubName: Full=Uncharacterized protein {ECO:0000313|EnsemblPlants:TRIAE_CS42_6DL_TGACv1_526496_AA1685350.1};
TRINITY_DN42090_c0_g1_i2	tr|A0A287GA73|A0A287GA73_HORVV	94	9.3e-12	78.2	99.6	A0A287GA73_HORVV	Uncharacterized protein	SubName: Full=Uncharacterized protein {ECO:0000313|EnsemblPlants:HORVU1Hr1G075820.10};
TRINITY_DN42090_c0_g1_i1	tr|A0A287GA73|A0A287GA73_HORVV	93	9e-15	88.2	99.6	A0A287GA73_HORVV	Uncharacterized protein	SubName: Full=Uncharacterized protein {ECO:0000313|EnsemblPlants:HORVU1Hr1G075820.10};
TRINITY_DN42022_c0_g1_i1	tr|W1P4G4|W1P4G4_AMBTC	70	4e-23	115.5	98.6	W1P4G4_AMBTC	Uncharacterized protein	SubName: Full=Uncharacterized protein {ECO:0000313|EMBL:ERN02808.1};
TRINITY_DN42051_c0_g1_i2	tr|A0A1D5Z1Z0|A0A1D5Z1Z0_WHEAT	85	7.8e-09	71.6	10.3	A0A1D5Z1Z0_WHEAT	Uncharacterized protein	SubName: Full=Uncharacterized protein {ECO:0000313|EnsemblPlants:TRIAE_CS42_5BL_TGACv1_404785_AA1310770.3};
TRINITY_DN42051_c0_g1_i1	tr|A0A1D5Z1Z0|A0A1D5Z1Z0_WHEAT	85	8e-09	71.6	10	A0A1D5Z1Z0_WHEAT	Uncharacterized protein	SubName: Full=Uncharacterized protein {ECO:0000313|EnsemblPlants:TRIAE_CS42_5BL_TGACv1_404785_AA1310770.3};
TRINITY_DN42027_c0_g1_i1	tr|M7Z794|M7Z794_TRIUA	27	2.4e-05	56.6	35.2	M7Z794_TRIUA	Uncharacterized protein	SubName: Full=Uncharacterized protein {ECO:0000313|EMBL:EMS55872.1, ECO:0000313|EnsemblPlants:TRIUR3_07033-P1};
TRINITY_DN42012_c0_g1_i2	tr|M8AKU9|M8AKU9_TRIUA	44	1.3e-11	80.5	7	M8AKU9_TRIUA	Uncharacterized protein	SubName: Full=Uncharacterized protein {ECO:0000313|EMBL:EMS65665.1, ECO:0000313|EnsemblPlants:TRIUR3_05406-P1};
TRINITY_DN42012_c0_g1_i1	tr|M8AKU9|M8AKU9_TRIUA	44	1.3e-11	80.5	6.7	M8AKU9_TRIUA	Uncharacterized protein	SubName: Full=Uncharacterized protein {ECO:0000313|EMBL:EMS65665.1, ECO:0000313|EnsemblPlants:TRIUR3_05406-P1};
TRINITY_DN42044_c0_g1_i1	tr|A0A1D5WHM9|A0A1D5WHM9_WHEAT	118	4.2e-52	212.6	95.7	A0A1D5WHM9_WHEAT	Uncharacterized protein	SubName: Full=Uncharacterized protein {ECO:0000313|EnsemblPlants:TRIAE_CS42_3DL_TGACv1_250123_AA0862480.1};
TRINITY_DN42044_c0_g1_i5	tr|D8L9Q1|D8L9Q1_WHEAT	104	8e-37	161.8	89.1	D8L9Q1_WHEAT	Glucan endo-1,3-beta-glucosidase GII,putative, expressed	SubName: Full=Glucan endo-1,3-beta-glucosidase GII,putative, expressed {ECO:0000313|EMBL:CBH32608.1, ECO:0000313|EnsemblPlants:TRIAE_CS42_3B_TGACv1_222229_AA0760150.1};
TRINITY_DN42044_c0_g1_i4	tr|A0A1D5VAK6|A0A1D5VAK6_WHEAT	82	3.4e-37	162.5	97.6	A0A1D5VAK6_WHEAT	Uncharacterized protein	SubName: Full=Uncharacterized protein {ECO:0000313|EnsemblPlants:TRIAE_CS42_3AL_TGACv1_195110_AA0644920.1};
TRINITY_DN42044_c0_g1_i8	tr|D8L9Q2|D8L9Q2_WHEAT	95	5.3e-35	155.6	89.1	D8L9Q2_WHEAT	Glucan endo-1,3-beta-glucosidase GII,putative, expressed	SubName: Full=Glucan endo-1,3-beta-glucosidase GII,putative, expressed {ECO:0000313|EMBL:CBH32609.1, ECO:0000313|EnsemblPlants:TRIAE_CS42_3B_TGACv1_222229_AA0760140.2};
TRINITY_DN42044_c0_g1_i2	tr|A0A1D5WHM9|A0A1D5WHM9_WHEAT	81	7.4e-35	154.8	93.1	A0A1D5WHM9_WHEAT	Uncharacterized protein	SubName: Full=Uncharacterized protein {ECO:0000313|EnsemblPlants:TRIAE_CS42_3DL_TGACv1_250123_AA0862480.1};
TRINITY_DN42044_c0_g1_i11	tr|D8L9Q1|D8L9Q1_WHEAT	104	6.2e-37	162.2	89.1	D8L9Q1_WHEAT	Glucan endo-1,3-beta-glucosidase GII,putative, expressed	SubName: Full=Glucan endo-1,3-beta-glucosidase GII,putative, expressed {ECO:0000313|EMBL:CBH32608.1, ECO:0000313|EnsemblPlants:TRIAE_CS42_3B_TGACv1_222229_AA0760150.1};
TRINITY_DN42044_c0_g1_i10	tr|A0A1D5W1T1|A0A1D5W1T1_WHEAT	68	1.1e-28	134	93.2	A0A1D5W1T1_WHEAT	Uncharacterized protein	SubName: Full=Uncharacterized protein {ECO:0000313|EnsemblPlants:TRIAE_CS42_3B_TGACv1_223287_AA0779710.1};
TRINITY_DN42044_c0_g1_i7	tr|A0A1D5WHN0|A0A1D5WHN0_WHEAT	65	3.3e-25	122.5	91.5	A0A1D5WHN0_WHEAT	Uncharacterized protein	SubName: Full=Uncharacterized protein {ECO:0000313|EnsemblPlants:TRIAE_CS42_3DL_TGACv1_250123_AA0862480.2};
TRINITY_DN42044_c0_g1_i3	tr|M8ARA7|M8ARA7_TRIUA	103	8.2e-42	178.3	89.6	M8ARA7_TRIUA	Glucan endo-1,3-beta-glucosidase GIII	SubName: Full=Glucan endo-1,3-beta-glucosidase GIII {ECO:0000313|EMBL:EMS67695.1, ECO:0000313|EnsemblPlants:TRIUR3_03096-P1};
TRINITY_DN42044_c0_g1_i9	tr|M8ARA7|M8ARA7_TRIUA	103	5.7e-43	182.2	89.6	M8ARA7_TRIUA	Glucan endo-1,3-beta-glucosidase GIII	SubName: Full=Glucan endo-1,3-beta-glucosidase GIII {ECO:0000313|EMBL:EMS67695.1, ECO:0000313|EnsemblPlants:TRIUR3_03096-P1};
TRINITY_DN42081_c0_g1_i1	tr|A0A1D5VZP5|A0A1D5VZP5_WHEAT	36	1.6e-11	77.8	29	A0A1D5VZP5_WHEAT	Uncharacterized protein	SubName: Full=Uncharacterized protein {ECO:0000313|EnsemblPlants:TRIAE_CS42_3B_TGACv1_222723_AA0769410.1};
TRINITY_DN42015_c0_g1_i1	tr|M8A125|M8A125_TRIUA	75	5.2e-30	139	69.9	M8A125_TRIUA	Leucine-rich repeat-containing protein 40	SubName: Full=Leucine-rich repeat-containing protein 40 {ECO:0000313|EMBL:EMS66002.1, ECO:0000313|EnsemblPlants:TRIUR3_25609-P1};
TRINITY_DN42050_c0_g1_i3	tr|M7ZB85|M7ZB85_TRIUA	62	2.1e-16	94.4	38.9	M7ZB85_TRIUA	Very-long-chain (3R)-3-hydroxyacyl-CoA dehydratase	RecName: Full=Very-long-chain (3R)-3-hydroxyacyl-CoA dehydratase {ECO:0000256|RuleBase:RU363109}; EC=4.2.1.134 {ECO:0000256|RuleBase:RU363109};
TRINITY_DN42050_c0_g1_i1	tr|M7ZB85|M7ZB85_TRIUA	78	4.1e-12	80.1	47.1	M7ZB85_TRIUA	Very-long-chain (3R)-3-hydroxyacyl-CoA dehydratase	RecName: Full=Very-long-chain (3R)-3-hydroxyacyl-CoA dehydratase {ECO:0000256|RuleBase:RU363109}; EC=4.2.1.134 {ECO:0000256|RuleBase:RU363109};
TRINITY_DN42050_c0_g1_i2	tr|M7ZB85|M7ZB85_TRIUA	62	7.3e-14	85.9	39.6	M7ZB85_TRIUA	Very-long-chain (3R)-3-hydroxyacyl-CoA dehydratase	RecName: Full=Very-long-chain (3R)-3-hydroxyacyl-CoA dehydratase {ECO:0000256|RuleBase:RU363109}; EC=4.2.1.134 {ECO:0000256|RuleBase:RU363109};
TRINITY_DN42026_c0_g1_i9	tr|W5DDN7|W5DDN7_WHEAT	58	5.8e-05	58.2	10.7	W5DDN7_WHEAT	Uncharacterized protein	SubName: Full=Uncharacterized protein {ECO:0000313|EnsemblPlants:TRIAE_CS42_3DL_TGACv1_249929_AA0858660.1};
TRINITY_DN42026_c0_g1_i10	tr|W5DDN7|W5DDN7_WHEAT	58	6e-05	58.2	10.4	W5DDN7_WHEAT	Uncharacterized protein	SubName: Full=Uncharacterized protein {ECO:0000313|EnsemblPlants:TRIAE_CS42_3DL_TGACv1_249929_AA0858660.1};
TRINITY_DN42026_c0_g1_i6	tr|W5DDN7|W5DDN7_WHEAT	58	5.8e-05	58.2	10.8	W5DDN7_WHEAT	Uncharacterized protein	SubName: Full=Uncharacterized protein {ECO:0000313|EnsemblPlants:TRIAE_CS42_3DL_TGACv1_249929_AA0858660.1};
TRINITY_DN42026_c0_g1_i1	tr|W5DDN7|W5DDN7_WHEAT	58	7.8e-05	55.8	39.5	W5DDN7_WHEAT	Uncharacterized protein	SubName: Full=Uncharacterized protein {ECO:0000313|EnsemblPlants:TRIAE_CS42_3DL_TGACv1_249929_AA0858660.1};
TRINITY_DN42026_c0_g1_i2	tr|W5DDN7|W5DDN7_WHEAT	58	6.5e-05	58.2	9.6	W5DDN7_WHEAT	Uncharacterized protein	SubName: Full=Uncharacterized protein {ECO:0000313|EnsemblPlants:TRIAE_CS42_3DL_TGACv1_249929_AA0858660.1};
TRINITY_DN42026_c0_g1_i3	tr|W5DDN7|W5DDN7_WHEAT	83	5.8e-28	134.8	13	W5DDN7_WHEAT	Uncharacterized protein	SubName: Full=Uncharacterized protein {ECO:0000313|EnsemblPlants:TRIAE_CS42_3DL_TGACv1_249929_AA0858660.1};
TRINITY_DN42026_c0_g1_i8	tr|W5DDN7|W5DDN7_WHEAT	58	6.5e-05	58.2	9.6	W5DDN7_WHEAT	Uncharacterized protein	SubName: Full=Uncharacterized protein {ECO:0000313|EnsemblPlants:TRIAE_CS42_3DL_TGACv1_249929_AA0858660.1};
TRINITY_DN42026_c0_g1_i4	tr|A0A1D5WGY8|A0A1D5WGY8_WHEAT	63	1.3e-14	90.5	9.6	A0A1D5WGY8_WHEAT	Uncharacterized protein	SubName: Full=Uncharacterized protein {ECO:0000313|EnsemblPlants:TRIAE_CS42_3DL_TGACv1_249929_AA0858660.2};
TRINITY_DN42058_c0_g1_i6	tr|W5GNY4|W5GNY4_WHEAT	33	1.1e-09	72.8	12.2	W5GNY4_WHEAT	Uncharacterized protein	SubName: Full=Uncharacterized protein {ECO:0000313|EnsemblPlants:TRIAE_CS42_6BS_TGACv1_513715_AA1647880.2};
TRINITY_DN42061_c0_g1_i4	tr|A0A1D6RUK6|A0A1D6RUK6_WHEAT	109	4.9e-52	214.2	26	A0A1D6RUK6_WHEAT	Uncharacterized protein	SubName: Full=Uncharacterized protein {ECO:0000313|EnsemblPlants:TRIAE_CS42_3DS_TGACv1_273254_AA0929940.1};
TRINITY_DN42061_c0_g1_i1	tr|M7ZMC4|M7ZMC4_TRIUA	117	3.4e-48	201.4	26.9	M7ZMC4_TRIUA	PHD finger protein rhinoceros	SubName: Full=PHD finger protein rhinoceros {ECO:0000313|EMBL:EMS61262.1, ECO:0000313|EnsemblPlants:TRIUR3_16855-P1};
TRINITY_DN42061_c0_g1_i9	tr|A0A1D6RUK6|A0A1D6RUK6_WHEAT	109	3.1e-52	214.2	41.8	A0A1D6RUK6_WHEAT	Uncharacterized protein	SubName: Full=Uncharacterized protein {ECO:0000313|EnsemblPlants:TRIAE_CS42_3DS_TGACv1_273254_AA0929940.1};
TRINITY_DN42061_c0_g1_i3	tr|A0A1D5UC68|A0A1D5UC68_WHEAT	122	2.7e-48	201.4	35.1	A0A1D5UC68_WHEAT	Uncharacterized protein	SubName: Full=Uncharacterized protein {ECO:0000313|EnsemblPlants:TRIAE_CS42_2BS_TGACv1_147063_AA0477490.1};
TRINITY_DN42061_c0_g1_i7	tr|A0A077RQH7|A0A077RQH7_WHEAT	94	3e-37	164.5	32.5	A0A077RQH7_WHEAT	Uncharacterized protein	SubName: Full=Uncharacterized protein {ECO:0000313|EMBL:CDM81653.1, ECO:0000313|EnsemblPlants:TRIAE_CS42_3B_TGACv1_223368_AA0781070.1};
TRINITY_DN42061_c0_g1_i6	tr|A0A1D6RUK6|A0A1D6RUK6_WHEAT	122	6.2e-47	196.4	49.5	A0A1D6RUK6_WHEAT	Uncharacterized protein	SubName: Full=Uncharacterized protein {ECO:0000313|EnsemblPlants:TRIAE_CS42_3DS_TGACv1_273254_AA0929940.1};
TRINITY_DN42034_c0_g1_i1	tr|A0A287SWZ7|A0A287SWZ7_HORVV	92	3.2e-10	74.3	38.5	A0A287SWZ7_HORVV	Uncharacterized protein	SubName: Full=Uncharacterized protein {ECO:0000313|EnsemblPlants:HORVU5Hr1G118690.1};
TRINITY_DN42006_c0_g1_i1	tr|A0A1D6ASF6|A0A1D6ASF6_WHEAT	95	3.2e-26	128.6	19.3	A0A1D6ASF6_WHEAT	Uncharacterized protein	SubName: Full=Uncharacterized protein {ECO:0000313|EnsemblPlants:TRIAE_CS42_6BL_TGACv1_501467_AA1617860.1};
TRINITY_DN42006_c0_g1_i3	tr|A0A1D6ASF6|A0A1D6ASF6_WHEAT	95	5.8e-28	134.4	19.4	A0A1D6ASF6_WHEAT	Uncharacterized protein	SubName: Full=Uncharacterized protein {ECO:0000313|EnsemblPlants:TRIAE_CS42_6BL_TGACv1_501467_AA1617860.1};
TRINITY_DN42006_c0_g1_i5	tr|A0A1D6ASF6|A0A1D6ASF6_WHEAT	41	8.3e-07	62.4	28.3	A0A1D6ASF6_WHEAT	Uncharacterized protein	SubName: Full=Uncharacterized protein {ECO:0000313|EnsemblPlants:TRIAE_CS42_6BL_TGACv1_501467_AA1617860.1};
TRINITY_DN42006_c0_g1_i4	tr|A0A1D6ASF6|A0A1D6ASF6_WHEAT	133	9.4e-31	143.7	27.6	A0A1D6ASF6_WHEAT	Uncharacterized protein	SubName: Full=Uncharacterized protein {ECO:0000313|EnsemblPlants:TRIAE_CS42_6BL_TGACv1_501467_AA1617860.1};
TRINITY_DN42006_c0_g1_i2	tr|A0A1D6ASF6|A0A1D6ASF6_WHEAT	41	9.8e-07	62.4	24	A0A1D6ASF6_WHEAT	Uncharacterized protein	SubName: Full=Uncharacterized protein {ECO:0000313|EnsemblPlants:TRIAE_CS42_6BL_TGACv1_501467_AA1617860.1};
TRINITY_DN42067_c0_g1_i1	tr|A0A1D5YBH2|A0A1D5YBH2_WHEAT	173	8.8e-81	309.3	52.6	A0A1D5YBH2_WHEAT	Lipoxygenase	RecName: Full=Lipoxygenase {ECO:0000256|RuleBase:RU003975}; EC=1.13.11.- {ECO:0000256|RuleBase:RU003975};
TRINITY_DN42067_c0_g1_i2	tr|A0A1D5ZJP9|A0A1D5ZJP9_WHEAT	132	1.7e-66	260.8	83.4	A0A1D5ZJP9_WHEAT	Lipoxygenase	SubName: Full=Lipoxygenase {ECO:0000313|EnsemblPlants:TRIAE_CS42_5DL_TGACv1_433064_AA1400410.3};
TRINITY_DN42067_c0_g1_i4	tr|A0A1D5YBH2|A0A1D5YBH2_WHEAT	135	2.8e-69	270	85.8	A0A1D5YBH2_WHEAT	Lipoxygenase	RecName: Full=Lipoxygenase {ECO:0000256|RuleBase:RU003975}; EC=1.13.11.- {ECO:0000256|RuleBase:RU003975};
TRINITY_DN42067_c0_g1_i3	tr|A0A1D5ZJP9|A0A1D5ZJP9_WHEAT	162	1.5e-77	298.9	38.5	A0A1D5ZJP9_WHEAT	Lipoxygenase	SubName: Full=Lipoxygenase {ECO:0000313|EnsemblPlants:TRIAE_CS42_5DL_TGACv1_433064_AA1400410.3};
TRINITY_DN42067_c0_g1_i6	tr|A0A1D6RYF2|A0A1D6RYF2_WHEAT	80	1e-38	167.5	98.8	A0A1D6RYF2_WHEAT	Lipoxygenase	RecName: Full=Lipoxygenase {ECO:0000256|RuleBase:RU003975}; EC=1.13.11.- {ECO:0000256|RuleBase:RU003975};
TRINITY_DN42067_c0_g1_i5	tr|A0A1D5YBH2|A0A1D5YBH2_WHEAT	165	2.5e-80	308.1	39.3	A0A1D5YBH2_WHEAT	Lipoxygenase	RecName: Full=Lipoxygenase {ECO:0000256|RuleBase:RU003975}; EC=1.13.11.- {ECO:0000256|RuleBase:RU003975};
TRINITY_DN42067_c0_g2_i1	tr|C6K7G4|C6K7G4_WHEAT	77	7.6e-33	147.9	99.1	C6K7G4_WHEAT	Lipoxygenase	RecName: Full=Lipoxygenase {ECO:0000256|RuleBase:RU003975}; EC=1.13.11.- {ECO:0000256|RuleBase:RU003975};
TRINITY_DN42098_c0_g1_i1	tr|W5CQV5|W5CQV5_WHEAT	170	6e-89	336.3	58.1	W5CQV5_WHEAT	Uncharacterized protein	SubName: Full=Uncharacterized protein {ECO:0000313|EMBL:CDM82392.1, ECO:0000313|EnsemblPlants:TRIAE_CS42_3B_TGACv1_225649_AA0810670.1};
TRINITY_DN42098_c0_g1_i3	tr|A0A1D5VM66|A0A1D5VM66_WHEAT	169	1.5e-87	331.6	56.9	A0A1D5VM66_WHEAT	Uncharacterized protein	SubName: Full=Uncharacterized protein {ECO:0000313|EnsemblPlants:TRIAE_CS42_3AS_TGACv1_213108_AA0705360.1};
TRINITY_DN42098_c0_g1_i2	tr|M8BJD2|M8BJD2_AEGTA	169	2.3e-88	334.3	56.8	M8BJD2_AEGTA	Uncharacterized protein	SubName: Full=Uncharacterized protein {ECO:0000313|EMBL:EMT06868.1, ECO:0000313|EnsemblPlants:EMT06868};
TRINITY_DN42087_c0_g1_i5	tr|A0A1D6B2J2|A0A1D6B2J2_WHEAT	50	1.7e-08	69.3	13.8	A0A1D6B2J2_WHEAT	Uncharacterized protein	SubName: Full=Uncharacterized protein {ECO:0000313|EnsemblPlants:TRIAE_CS42_6DL_TGACv1_526310_AA1679180.1};
TRINITY_DN42087_c0_g1_i3	tr|A0A1D6B2J2|A0A1D6B2J2_WHEAT	50	1.3e-08	69.3	17.9	A0A1D6B2J2_WHEAT	Uncharacterized protein	SubName: Full=Uncharacterized protein {ECO:0000313|EnsemblPlants:TRIAE_CS42_6DL_TGACv1_526310_AA1679180.1};
TRINITY_DN42087_c0_g1_i6	tr|A0A1D6B2J2|A0A1D6B2J2_WHEAT	50	1.9e-08	69.3	12.6	A0A1D6B2J2_WHEAT	Uncharacterized protein	SubName: Full=Uncharacterized protein {ECO:0000313|EnsemblPlants:TRIAE_CS42_6DL_TGACv1_526310_AA1679180.1};
TRINITY_DN42087_c0_g1_i9	tr|M7Z4P8|M7Z4P8_TRIUA	34	1.8e-10	73.6	45.9	M7Z4P8_TRIUA	Uncharacterized protein	SubName: Full=Uncharacterized protein {ECO:0000313|EMBL:EMS54962.1, ECO:0000313|EnsemblPlants:TRIUR3_30422-P1};
TRINITY_DN42075_c0_g1_i1	tr|A0A1D5STU8|A0A1D5STU8_WHEAT	474	2.8e-277	962.6	97.6	A0A1D5STU8_WHEAT	Uncharacterized protein	SubName: Full=Uncharacterized protein {ECO:0000313|EnsemblPlants:TRIAE_CS42_1DL_TGACv1_061859_AA0204470.1};
TRINITY_DN42045_c0_g1_i3	tr|A0A287NG27|A0A287NG27_HORVV	46	3.2e-05	59.7	5	A0A287NG27_HORVV	FRIGIDA-like protein	RecName: Full=FRIGIDA-like protein {ECO:0000256|RuleBase:RU364012};
TRINITY_DN42045_c0_g1_i6	tr|M8ATQ5|M8ATQ5_AEGTA	32	0.00066	53.9	9.9	M8ATQ5_AEGTA	Hexosyltransferase	RecName: Full=Hexosyltransferase {ECO:0000256|RuleBase:RU362027}; EC=2.4.1.- {ECO:0000256|RuleBase:RU362027};
TRINITY_DN42045_c1_g1_i1	tr|M8BND8|M8BND8_AEGTA	112	1.3e-06	62	66.5	M8BND8_AEGTA	Putative oxidoreductase GLYR1	SubName: Full=Putative oxidoreductase GLYR1 {ECO:0000313|EMBL:EMT23328.1, ECO:0000313|EnsemblPlants:EMT23328};
TRINITY_DN42045_c1_g1_i2	tr|A0A1D5WCD6|A0A1D5WCD6_WHEAT	26	0.00034	53.9	15.5	A0A1D5WCD6_WHEAT	Uncharacterized protein	SubName: Full=Uncharacterized protein {ECO:0000313|EnsemblPlants:TRIAE_CS42_3DL_TGACv1_249035_AA0835530.2};
TRINITY_DN42001_c0_g1_i2	tr|A0A1D5ZVF1|A0A1D5ZVF1_WHEAT	93	2.3e-29	137.9	42.7	A0A1D5ZVF1_WHEAT	Uncharacterized protein	SubName: Full=Uncharacterized protein {ECO:0000313|EnsemblPlants:TRIAE_CS42_5DL_TGACv1_435323_AA1448970.1};
TRINITY_DN42001_c0_g1_i3	tr|M8ARZ2|M8ARZ2_TRIUA	91	1.6e-17	98.2	52.3	M8ARZ2_TRIUA	Uncharacterized protein	SubName: Full=Uncharacterized protein {ECO:0000313|EMBL:EMS67950.1, ECO:0000313|EnsemblPlants:TRIUR3_01989-P1};
TRINITY_DN42030_c0_g1_i4	tr|A0A1D5WVS8|A0A1D5WVS8_WHEAT	157	4.2e-23	117.1	65	A0A1D5WVS8_WHEAT	Uncharacterized protein	SubName: Full=Uncharacterized protein {ECO:0000313|EnsemblPlants:TRIAE_CS42_3DS_TGACv1_273087_AA0928190.1};
TRINITY_DN42030_c0_g1_i2	tr|N1QWQ7|N1QWQ7_AEGTA	234	1.2e-26	129	87.4	N1QWQ7_AEGTA	Methyltransferase-like protein 13	SubName: Full=Methyltransferase-like protein 13 {ECO:0000313|EMBL:EMT14674.1, ECO:0000313|EnsemblPlants:EMT14674};
TRINITY_DN42030_c0_g1_i3	tr|N1QWQ7|N1QWQ7_AEGTA	244	6.3e-39	169.9	90.4	N1QWQ7_AEGTA	Methyltransferase-like protein 13	SubName: Full=Methyltransferase-like protein 13 {ECO:0000313|EMBL:EMT14674.1, ECO:0000313|EnsemblPlants:EMT14674};
TRINITY_DN42030_c0_g1_i5	tr|I1J1D1|I1J1D1_BRADI	109	1.2e-38	167.9	89.3	I1J1D1_BRADI	Uncharacterized protein	SubName: Full=Uncharacterized protein {ECO:0000313|EnsemblPlants:BRADI5G20467.1};
TRINITY_DN42030_c0_g1_i1	tr|N1QWQ7|N1QWQ7_AEGTA	95	5.5e-17	95.9	78.2	N1QWQ7_AEGTA	Methyltransferase-like protein 13	SubName: Full=Methyltransferase-like protein 13 {ECO:0000313|EMBL:EMT14674.1, ECO:0000313|EnsemblPlants:EMT14674};
TRINITY_DN42030_c0_g1_i6	tr|I1HP84|I1HP84_BRADI	88	7.4e-38	164.9	97.8	I1HP84_BRADI	Uncharacterized protein	SubName: Full=Uncharacterized protein {ECO:0000313|EnsemblPlants:BRADI2G42996.1};
TRINITY_DN42030_c0_g2_i1	tr|A0A1D6FKL1|A0A1D6FKL1_MAIZE	162	1.6e-29	138.3	81.8	A0A1D6FKL1_MAIZE	Retrovirus-related Pol polyprotein LINE-1	SubName: Full=Retrovirus-related Pol polyprotein LINE-1 {ECO:0000313|EMBL:AQK92258.1};
TRINITY_DN42030_c1_g2_i1	tr|M8A782|M8A782_TRIUA	48	7.3e-16	92	44.3	M8A782_TRIUA	Polycomb group protein EMBRYONIC FLOWER 2	SubName: Full=Polycomb group protein EMBRYONIC FLOWER 2 {ECO:0000313|EMBL:EMS56299.1, ECO:0000313|EnsemblPlants:TRIUR3_11875-P1};
TRINITY_DN42030_c2_g1_i1	tr|M8BIR7|M8BIR7_AEGTA	62	3.1e-28	132.5	91.2	M8BIR7_AEGTA	Putative serine/threonine-protein kinase GCN2	SubName: Full=Putative serine/threonine-protein kinase GCN2 {ECO:0000313|EMBL:EMT24895.1, ECO:0000313|EnsemblPlants:EMT24895};
TRINITY_DN42030_c5_g1_i1	tr|T1N373|T1N373_TRIUA	86	3.5e-19	102.8	90.6	T1N373_TRIUA	Uncharacterized protein	SubName: Full=Uncharacterized protein {ECO:0000313|EnsemblPlants:TRIUR3_24835-P1};
TRINITY_DN42023_c0_g1_i6	tr|M8B0F3|M8B0F3_AEGTA	33	0.00013	54.7	29.9	M8B0F3_AEGTA	Uncharacterized protein	SubName: Full=Uncharacterized protein {ECO:0000313|EMBL:EMT10222.1, ECO:0000313|EnsemblPlants:EMT10222};
TRINITY_DN42023_c0_g1_i2	tr|M8B0F3|M8B0F3_AEGTA	45	2e-09	70.5	48.4	M8B0F3_AEGTA	Uncharacterized protein	SubName: Full=Uncharacterized protein {ECO:0000313|EMBL:EMT10222.1, ECO:0000313|EnsemblPlants:EMT10222};
TRINITY_DN42023_c0_g1_i3	tr|M8B0F3|M8B0F3_AEGTA	45	3.3e-09	70.5	28.4	M8B0F3_AEGTA	Uncharacterized protein	SubName: Full=Uncharacterized protein {ECO:0000313|EMBL:EMT10222.1, ECO:0000313|EnsemblPlants:EMT10222};
TRINITY_DN42023_c0_g1_i4	tr|A0A0V0YW16|A0A0V0YW16_9BILA	31	8.7e-05	55.1	32.6	A0A0V0YW16_9BILA	Uncharacterized protein	SubName: Full=Uncharacterized protein {ECO:0000313|EMBL:KRY04503.1}; Flags: Fragment;
TRINITY_DN42023_c0_g2_i1	tr|M8B0F3|M8B0F3_AEGTA	33	9.1e-07	61.2	46.5	M8B0F3_AEGTA	Uncharacterized protein	SubName: Full=Uncharacterized protein {ECO:0000313|EMBL:EMT10222.1, ECO:0000313|EnsemblPlants:EMT10222};
TRINITY_DN42066_c0_g1_i1	tr|A0A1D5YS89|A0A1D5YS89_WHEAT	129	6e-67	262.7	61.9	A0A1D5YS89_WHEAT	Uncharacterized protein	SubName: Full=Uncharacterized protein {ECO:0000313|EnsemblPlants:TRIAE_CS42_5AS_TGACv1_392607_AA1261840.1};
TRINITY_DN42063_c0_g1_i2	tr|A0A1D5WLM6|A0A1D5WLM6_WHEAT	138	2.8e-34	154.5	54.7	A0A1D5WLM6_WHEAT	Uncharacterized protein	SubName: Full=Uncharacterized protein {ECO:0000313|EnsemblPlants:TRIAE_CS42_3DL_TGACv1_251379_AA0880920.1};
TRINITY_DN42063_c0_g1_i1	tr|A0A1D5WLM6|A0A1D5WLM6_WHEAT	138	2.1e-34	154.8	55.6	A0A1D5WLM6_WHEAT	Uncharacterized protein	SubName: Full=Uncharacterized protein {ECO:0000313|EnsemblPlants:TRIAE_CS42_3DL_TGACv1_251379_AA0880920.1};
TRINITY_DN22212_c0_g1_i1	tr|A0A024T7G6|A0A024T7G6_9STRA	93	1.6e-43	185.3	33.3	A0A024T7G6_9STRA	Protein TAR1	SubName: Full=Protein TAR1 {ECO:0000313|EMBL:ETV89758.1};
TRINITY_DN22212_c0_g2_i1	tr|A0A0R0GU46|A0A0R0GU46_SOYBN	141	3.1e-26	127.1	84.3	A0A0R0GU46_SOYBN	Uncharacterized protein	SubName: Full=Uncharacterized protein {ECO:0000313|EMBL:KRH17823.1}; Flags: Fragment;
TRINITY_DN22212_c0_g2_i3	tr|A0A0R0GU46|A0A0R0GU46_SOYBN	142	1.7e-25	125.6	45.6	A0A0R0GU46_SOYBN	Uncharacterized protein	SubName: Full=Uncharacterized protein {ECO:0000313|EMBL:KRH17823.1}; Flags: Fragment;
TRINITY_DN22212_c0_g2_i2	tr|A7TAG1|A7TAG1_NEMVE	102	1.1e-18	102.1	61.6	A7TAG1_NEMVE	Predicted protein	SubName: Full=Predicted protein {ECO:0000313|EMBL:EDO27009.1}; Flags: Fragment;
TRINITY_DN22212_c0_g3_i1	tr|A0A0S3TEN3|A0A0S3TEN3_PHAAN	114	1.7e-50	207.2	99.1	A0A0S3TEN3_PHAAN	Uncharacterized protein	SubName: Full=Uncharacterized protein {ECO:0000313|EMBL:BAU03567.1};
TRINITY_DN22212_c0_g3_i2	tr|A0A0S3TEN3|A0A0S3TEN3_PHAAN	114	2.2e-50	206.8	99.1	A0A0S3TEN3_PHAAN	Uncharacterized protein	SubName: Full=Uncharacterized protein {ECO:0000313|EMBL:BAU03567.1};
TRINITY_DN22212_c0_g3_i3	tr|F0UD52|F0UD52_AJEC8	118	1.1e-26	128.3	89.8	F0UD52_AJEC8	Transcript antisense to ribosomal RNA protein	SubName: Full=Transcript antisense to ribosomal RNA protein {ECO:0000313|EMBL:EGC42647.1}; Flags: Fragment;
TRINITY_DN22212_c0_g3_i4	tr|A0A0S3TE70|A0A0S3TE70_PHAAN	125	3.2e-58	233	95.9	A0A0S3TE70_PHAAN	Uncharacterized protein	SubName: Full=Uncharacterized protein {ECO:0000313|EMBL:BAU03431.1}; Flags: Fragment;
TRINITY_DN22212_c2_g1_i1	tr|A0A1D5XYP7|A0A1D5XYP7_WHEAT	35	1.2e-08	68.9	18	A0A1D5XYP7_WHEAT	Uncharacterized protein	SubName: Full=Uncharacterized protein {ECO:0000313|EnsemblPlants:TRIAE_CS42_4DL_TGACv1_343012_AA1127490.1};
TRINITY_DN22289_c0_g1_i5	tr|M7ZLR9|M7ZLR9_TRIUA	105	5.2e-45	189.5	62.9	M7ZLR9_TRIUA	E3 ubiquitin-protein ligase RNF14	SubName: Full=E3 ubiquitin-protein ligase RNF14 {ECO:0000313|EMBL:EMS61037.1, ECO:0000313|EnsemblPlants:TRIUR3_25050-P1};
TRINITY_DN22289_c0_g1_i1	tr|M7ZLR9|M7ZLR9_TRIUA	221	1.4e-126	461.1	89.8	M7ZLR9_TRIUA	E3 ubiquitin-protein ligase RNF14	SubName: Full=E3 ubiquitin-protein ligase RNF14 {ECO:0000313|EMBL:EMS61037.1, ECO:0000313|EnsemblPlants:TRIUR3_25050-P1};
TRINITY_DN22289_c0_g1_i3	tr|M8BU24|M8BU24_AEGTA	224	4.4e-123	449.5	84	M8BU24_AEGTA	RING-type E3 ubiquitin transferase	RecName: Full=RING-type E3 ubiquitin transferase {ECO:0000256|SAAS:SAAS00970528}; EC=2.3.2.27 {ECO:0000256|SAAS:SAAS00970528};
TRINITY_DN22289_c0_g1_i8	tr|A0A1D5U599|A0A1D5U599_WHEAT	260	5.9e-102	379.4	92.4	A0A1D5U599_WHEAT	Uncharacterized protein	SubName: Full=Uncharacterized protein {ECO:0000313|EnsemblPlants:TRIAE_CS42_2BL_TGACv1_132570_AA0438450.1};
TRINITY_DN22289_c0_g1_i7	tr|A0A1D5U599|A0A1D5U599_WHEAT	224	4.4e-123	449.5	84	A0A1D5U599_WHEAT	Uncharacterized protein	SubName: Full=Uncharacterized protein {ECO:0000313|EnsemblPlants:TRIAE_CS42_2BL_TGACv1_132570_AA0438450.1};
TRINITY_DN22289_c0_g1_i9	tr|A0A1D5U599|A0A1D5U599_WHEAT	135	4.6e-68	265.8	99.3	A0A1D5U599_WHEAT	Uncharacterized protein	SubName: Full=Uncharacterized protein {ECO:0000313|EnsemblPlants:TRIAE_CS42_2BL_TGACv1_132570_AA0438450.1};
TRINITY_DN22289_c0_g1_i2	tr|A0A1D5TWW0|A0A1D5TWW0_WHEAT	208	1.2e-107	397.9	99.4	A0A1D5TWW0_WHEAT	RING-type E3 ubiquitin transferase	RecName: Full=RING-type E3 ubiquitin transferase {ECO:0000256|SAAS:SAAS00970528}; EC=2.3.2.27 {ECO:0000256|SAAS:SAAS00970528};
TRINITY_DN22289_c0_g1_i10	tr|M7ZLR9|M7ZLR9_TRIUA	177	7.1e-85	322	99.6	M7ZLR9_TRIUA	E3 ubiquitin-protein ligase RNF14	SubName: Full=E3 ubiquitin-protein ligase RNF14 {ECO:0000313|EMBL:EMS61037.1, ECO:0000313|EnsemblPlants:TRIUR3_25050-P1};
TRINITY_DN22289_c0_g1_i4	tr|A0A1D5U599|A0A1D5U599_WHEAT	213	9.3e-109	401.7	90.9	A0A1D5U599_WHEAT	Uncharacterized protein	SubName: Full=Uncharacterized protein {ECO:0000313|EnsemblPlants:TRIAE_CS42_2BL_TGACv1_132570_AA0438450.1};
TRINITY_DN22289_c0_g1_i6	tr|A0A1D5U599|A0A1D5U599_WHEAT	50	1.5e-12	80.5	65.8	A0A1D5U599_WHEAT	Uncharacterized protein	SubName: Full=Uncharacterized protein {ECO:0000313|EnsemblPlants:TRIAE_CS42_2BL_TGACv1_132570_AA0438450.1};
TRINITY_DN22216_c0_g1_i1	tr|A0A1D6ASA1|A0A1D6ASA1_WHEAT	83	1.1e-34	156	29.5	A0A1D6ASA1_WHEAT	Uncharacterized protein	SubName: Full=Uncharacterized protein {ECO:0000313|EnsemblPlants:TRIAE_CS42_6BL_TGACv1_501426_AA1617280.1};
TRINITY_DN22216_c0_g1_i3	tr|A0A1D6ASA1|A0A1D6ASA1_WHEAT	83	1.1e-34	156	29.7	A0A1D6ASA1_WHEAT	Uncharacterized protein	SubName: Full=Uncharacterized protein {ECO:0000313|EnsemblPlants:TRIAE_CS42_6BL_TGACv1_501426_AA1617280.1};
TRINITY_DN22216_c0_g1_i2	tr|A0A1D6ASA1|A0A1D6ASA1_WHEAT	83	8e-35	156.4	30.1	A0A1D6ASA1_WHEAT	Uncharacterized protein	SubName: Full=Uncharacterized protein {ECO:0000313|EnsemblPlants:TRIAE_CS42_6BL_TGACv1_501426_AA1617280.1};
TRINITY_DN22294_c0_g1_i1	tr|W5A5C7|W5A5C7_WHEAT	62	1.4e-27	131	60	W5A5C7_WHEAT	Uncharacterized protein	SubName: Full=Uncharacterized protein {ECO:0000313|EnsemblPlants:TRIAE_CS42_1BL_TGACv1_031099_AA0107600.1};
TRINITY_DN22226_c0_g1_i1	tr|A0A1D5ZPB5|A0A1D5ZPB5_WHEAT	147	3.6e-74	286.2	99.5	A0A1D5ZPB5_WHEAT	Patatin	RecName: Full=Patatin {ECO:0000256|RuleBase:RU361262}; EC=3.1.1.- {ECO:0000256|RuleBase:RU361262};
TRINITY_DN22226_c0_g1_i2	tr|A0A1D5ZPB5|A0A1D5ZPB5_WHEAT	147	3.6e-74	286.2	99.5	A0A1D5ZPB5_WHEAT	Patatin	RecName: Full=Patatin {ECO:0000256|RuleBase:RU361262}; EC=3.1.1.- {ECO:0000256|RuleBase:RU361262};
TRINITY_DN22211_c0_g1_i12	tr|A0A1D5VJC5|A0A1D5VJC5_WHEAT	132	9.5e-67	263.5	23.5	A0A1D5VJC5_WHEAT	Uncharacterized protein	SubName: Full=Uncharacterized protein {ECO:0000313|EnsemblPlants:TRIAE_CS42_3AS_TGACv1_211492_AA0690760.2};
TRINITY_DN22211_c0_g1_i10	tr|A0A1D5WW72|A0A1D5WW72_WHEAT	105	6.4e-12	79.3	74.5	A0A1D5WW72_WHEAT	Uncharacterized protein	SubName: Full=Uncharacterized protein {ECO:0000313|EnsemblPlants:TRIAE_CS42_3DS_TGACv1_273410_AA0931010.1};
TRINITY_DN22211_c0_g1_i7	tr|A0A1D5VJC5|A0A1D5VJC5_WHEAT	479	9.4e-81	310.1	79.5	A0A1D5VJC5_WHEAT	Uncharacterized protein	SubName: Full=Uncharacterized protein {ECO:0000313|EnsemblPlants:TRIAE_CS42_3AS_TGACv1_211492_AA0690760.2};
TRINITY_DN22211_c0_g1_i9	tr|A0A1D5VJC5|A0A1D5VJC5_WHEAT	479	8.8e-81	310.1	84.5	A0A1D5VJC5_WHEAT	Uncharacterized protein	SubName: Full=Uncharacterized protein {ECO:0000313|EnsemblPlants:TRIAE_CS42_3AS_TGACv1_211492_AA0690760.2};
TRINITY_DN22211_c0_g1_i6	tr|A0A1D5VJC5|A0A1D5VJC5_WHEAT	132	5.9e-67	263.5	38	A0A1D5VJC5_WHEAT	Uncharacterized protein	SubName: Full=Uncharacterized protein {ECO:0000313|EnsemblPlants:TRIAE_CS42_3AS_TGACv1_211492_AA0690760.2};
TRINITY_DN22211_c0_g1_i1	tr|A0A1D5VJC5|A0A1D5VJC5_WHEAT	462	2.8e-86	328.2	93.1	A0A1D5VJC5_WHEAT	Uncharacterized protein	SubName: Full=Uncharacterized protein {ECO:0000313|EnsemblPlants:TRIAE_CS42_3AS_TGACv1_211492_AA0690760.2};
TRINITY_DN22211_c0_g2_i1	tr|A0A1D5W4I5|A0A1D5W4I5_WHEAT	106	5.1e-45	191.4	16.9	A0A1D5W4I5_WHEAT	Uncharacterized protein	SubName: Full=Uncharacterized protein {ECO:0000313|EnsemblPlants:TRIAE_CS42_3B_TGACv1_224158_AA0793150.3};
TRINITY_DN22266_c0_g1_i3	tr|A0A096ULU8|A0A096ULU8_WHEAT	288	4.9e-162	579.3	81.7	A0A096ULU8_WHEAT	Uncharacterized protein	SubName: Full=Uncharacterized protein {ECO:0000313|EnsemblPlants:TRIAE_CS42_2AS_TGACv1_114739_AA0369230.2};
TRINITY_DN22266_c0_g1_i2	tr|A0A096ULU8|A0A096ULU8_WHEAT	241	4.6e-129	469.5	80.6	A0A096ULU8_WHEAT	Uncharacterized protein	SubName: Full=Uncharacterized protein {ECO:0000313|EnsemblPlants:TRIAE_CS42_2AS_TGACv1_114739_AA0369230.2};
TRINITY_DN22266_c0_g1_i5	tr|A0A096ULU8|A0A096ULU8_WHEAT	52	1e-15	91.7	44.8	A0A096ULU8_WHEAT	Uncharacterized protein	SubName: Full=Uncharacterized protein {ECO:0000313|EnsemblPlants:TRIAE_CS42_2AS_TGACv1_114739_AA0369230.2};
TRINITY_DN22266_c0_g1_i7	tr|A0A096ULU8|A0A096ULU8_WHEAT	186	4.2e-97	363.2	69.5	A0A096ULU8_WHEAT	Uncharacterized protein	SubName: Full=Uncharacterized protein {ECO:0000313|EnsemblPlants:TRIAE_CS42_2AS_TGACv1_114739_AA0369230.2};
TRINITY_DN22266_c0_g1_i1	tr|A0A096ULU8|A0A096ULU8_WHEAT	259	7.1e-136	492.3	81.7	A0A096ULU8_WHEAT	Uncharacterized protein	SubName: Full=Uncharacterized protein {ECO:0000313|EnsemblPlants:TRIAE_CS42_2AS_TGACv1_114739_AA0369230.2};
TRINITY_DN22266_c0_g1_i4	tr|A0A096ULU8|A0A096ULU8_WHEAT	356	1.1e-152	548.5	84.7	A0A096ULU8_WHEAT	Uncharacterized protein	SubName: Full=Uncharacterized protein {ECO:0000313|EnsemblPlants:TRIAE_CS42_2AS_TGACv1_114739_AA0369230.2};
TRINITY_DN22266_c0_g1_i8	tr|A0A096ULU8|A0A096ULU8_WHEAT	241	4.6e-129	469.5	80.8	A0A096ULU8_WHEAT	Uncharacterized protein	SubName: Full=Uncharacterized protein {ECO:0000313|EnsemblPlants:TRIAE_CS42_2AS_TGACv1_114739_AA0369230.2};
TRINITY_DN22267_c0_g1_i1	tr|A0A1D5TVL0|A0A1D5TVL0_WHEAT	41	5.1e-13	82.8	32.8	A0A1D5TVL0_WHEAT	Uncharacterized protein	SubName: Full=Uncharacterized protein {ECO:0000313|EnsemblPlants:TRIAE_CS42_2BL_TGACv1_129633_AA0391120.2};
TRINITY_DN22267_c0_g1_i2	tr|A0A1D5TVL0|A0A1D5TVL0_WHEAT	41	4.1e-13	82.8	41.3	A0A1D5TVL0_WHEAT	Uncharacterized protein	SubName: Full=Uncharacterized protein {ECO:0000313|EnsemblPlants:TRIAE_CS42_2BL_TGACv1_129633_AA0391120.2};
TRINITY_DN22221_c0_g1_i5	tr|A0A1D6BUQ0|A0A1D6BUQ0_WHEAT	179	6.8e-75	288.9	99.3	A0A1D6BUQ0_WHEAT	Uncharacterized protein	SubName: Full=Uncharacterized protein {ECO:0000313|EnsemblPlants:TRIAE_CS42_7AS_TGACv1_569619_AA1820460.1};
TRINITY_DN22221_c0_g1_i3	tr|A0A1D6CJG6|A0A1D6CJG6_WHEAT	161	3.8e-71	276.6	81	A0A1D6CJG6_WHEAT	Uncharacterized protein	SubName: Full=Uncharacterized protein {ECO:0000313|EnsemblPlants:TRIAE_CS42_7BS_TGACv1_593620_AA1953170.1};
TRINITY_DN22221_c0_g1_i4	tr|A0A1D6CEH7|A0A1D6CEH7_WHEAT	188	1.2e-91	344.7	90.4	A0A1D6CEH7_WHEAT	Uncharacterized protein	SubName: Full=Uncharacterized protein {ECO:0000313|EnsemblPlants:TRIAE_CS42_7BS_TGACv1_591980_AA1927290.2};
TRINITY_DN22221_c0_g1_i13	tr|A0A1D6CJG6|A0A1D6CJG6_WHEAT	178	1.4e-87	331.3	82.5	A0A1D6CJG6_WHEAT	Uncharacterized protein	SubName: Full=Uncharacterized protein {ECO:0000313|EnsemblPlants:TRIAE_CS42_7BS_TGACv1_593620_AA1953170.1};
TRINITY_DN22221_c0_g1_i12	tr|A0A1D6CWI8|A0A1D6CWI8_WHEAT	145	2.5e-67	263.5	99.5	A0A1D6CWI8_WHEAT	Uncharacterized protein	SubName: Full=Uncharacterized protein {ECO:0000313|EnsemblPlants:TRIAE_CS42_7DS_TGACv1_621517_AA2017960.1};
TRINITY_DN22221_c0_g1_i7	tr|A0A1D6CEH7|A0A1D6CEH7_WHEAT	188	1.1e-89	338.2	90.4	A0A1D6CEH7_WHEAT	Uncharacterized protein	SubName: Full=Uncharacterized protein {ECO:0000313|EnsemblPlants:TRIAE_CS42_7BS_TGACv1_591980_AA1927290.2};
TRINITY_DN22221_c0_g1_i1	tr|A0A1D6CEH7|A0A1D6CEH7_WHEAT	188	1.3e-90	341.3	90.4	A0A1D6CEH7_WHEAT	Uncharacterized protein	SubName: Full=Uncharacterized protein {ECO:0000313|EnsemblPlants:TRIAE_CS42_7BS_TGACv1_591980_AA1927290.2};
TRINITY_DN22221_c0_g1_i11	tr|A0A1D6CEH7|A0A1D6CEH7_WHEAT	166	3.8e-81	309.7	89.4	A0A1D6CEH7_WHEAT	Uncharacterized protein	SubName: Full=Uncharacterized protein {ECO:0000313|EnsemblPlants:TRIAE_CS42_7BS_TGACv1_591980_AA1927290.2};
TRINITY_DN22221_c0_g1_i10	tr|A0A1D6CWI8|A0A1D6CWI8_WHEAT	145	3e-65	256.5	99.5	A0A1D6CWI8_WHEAT	Uncharacterized protein	SubName: Full=Uncharacterized protein {ECO:0000313|EnsemblPlants:TRIAE_CS42_7DS_TGACv1_621517_AA2017960.1};
TRINITY_DN22221_c0_g1_i2	tr|A0A1D6CEH7|A0A1D6CEH7_WHEAT	188	1.9e-92	347.4	90.4	A0A1D6CEH7_WHEAT	Uncharacterized protein	SubName: Full=Uncharacterized protein {ECO:0000313|EnsemblPlants:TRIAE_CS42_7BS_TGACv1_591980_AA1927290.2};
TRINITY_DN22288_c0_g1_i1	tr|A0A1D5YHL1|A0A1D5YHL1_WHEAT	47	1.1e-17	99.4	18.7	A0A1D5YHL1_WHEAT	Uncharacterized protein	SubName: Full=Uncharacterized protein {ECO:0000313|EnsemblPlants:TRIAE_CS42_5AL_TGACv1_375112_AA1216190.1};
TRINITY_DN22284_c0_g1_i1	tr|A0A1D6BAG7|A0A1D6BAG7_WHEAT	209	3.2e-68	266.9	99.8	A0A1D6BAG7_WHEAT	Uncharacterized protein	SubName: Full=Uncharacterized protein {ECO:0000313|EnsemblPlants:TRIAE_CS42_6DL_TGACv1_528573_AA1715110.2};
TRINITY_DN22284_c0_g1_i3	tr|N1R5E3|N1R5E3_AEGTA	67	7.2e-27	130.6	16	N1R5E3_AEGTA	Heat shock protein STI	SubName: Full=Heat shock protein STI {ECO:0000313|EMBL:EMT33587.1, ECO:0000313|EnsemblPlants:EMT33587};
TRINITY_DN22284_c0_g1_i4	sp|F8RP11|HSOP_WHEAT	213	2e-65	257.7	99.8	HSOP_WHEAT	Hsp70-Hsp90 organizing protein; TaHop	RecName: Full=Hsp70-Hsp90 organizing protein; Short=TaHop;
TRINITY_DN22284_c0_g1_i5	tr|N1R5E3|N1R5E3_AEGTA	173	7.1e-47	197.2	36.2	N1R5E3_AEGTA	Heat shock protein STI	SubName: Full=Heat shock protein STI {ECO:0000313|EMBL:EMT33587.1, ECO:0000313|EnsemblPlants:EMT33587};
TRINITY_DN22284_c0_g1_i2	tr|N1R5E3|N1R5E3_AEGTA	173	7.1e-47	197.2	36.4	N1R5E3_AEGTA	Heat shock protein STI	SubName: Full=Heat shock protein STI {ECO:0000313|EMBL:EMT33587.1, ECO:0000313|EnsemblPlants:EMT33587};
TRINITY_DN22284_c0_g2_i4	tr|N1R5E3|N1R5E3_AEGTA	70	1.2e-29	140.2	12.2	N1R5E3_AEGTA	Heat shock protein STI	SubName: Full=Heat shock protein STI {ECO:0000313|EMBL:EMT33587.1, ECO:0000313|EnsemblPlants:EMT33587};
TRINITY_DN22284_c0_g2_i2	tr|N1R5E3|N1R5E3_AEGTA	70	1.2e-29	140.2	12.2	N1R5E3_AEGTA	Heat shock protein STI	SubName: Full=Heat shock protein STI {ECO:0000313|EMBL:EMT33587.1, ECO:0000313|EnsemblPlants:EMT33587};
TRINITY_DN22284_c0_g2_i3	tr|N1R5E3|N1R5E3_AEGTA	70	1.2e-29	140.2	12.1	N1R5E3_AEGTA	Heat shock protein STI	SubName: Full=Heat shock protein STI {ECO:0000313|EMBL:EMT33587.1, ECO:0000313|EnsemblPlants:EMT33587};
TRINITY_DN22284_c0_g2_i1	tr|M7Z9N2|M7Z9N2_TRIUA	203	1.1e-33	153.7	33.8	M7Z9N2_TRIUA	Heat shock protein STI	SubName: Full=Heat shock protein STI {ECO:0000313|EMBL:EMS56336.1, ECO:0000313|EnsemblPlants:TRIUR3_12892-P1};
TRINITY_DN22284_c0_g3_i1	tr|N1QUU6|N1QUU6_AEGTA	34	3.8e-10	73.2	28.9	N1QUU6_AEGTA	Heat shock protein STI	SubName: Full=Heat shock protein STI {ECO:0000313|EMBL:EMT13260.1, ECO:0000313|EnsemblPlants:EMT13260};
TRINITY_DN22213_c0_g1_i2	tr|A0A1D6BBM1|A0A1D6BBM1_WHEAT	36	6.8e-09	69.7	19	A0A1D6BBM1_WHEAT	Uncharacterized protein	SubName: Full=Uncharacterized protein {ECO:0000313|EnsemblPlants:TRIAE_CS42_6DS_TGACv1_542484_AA1721970.1};
TRINITY_DN22213_c0_g1_i8	tr|R7WA00|R7WA00_AEGTA	39	2.1e-13	85.5	12	R7WA00_AEGTA	Uncharacterized protein	SubName: Full=Uncharacterized protein {ECO:0000313|EMBL:EMT19117.1, ECO:0000313|EnsemblPlants:EMT19117};
TRINITY_DN22213_c0_g1_i12	tr|A0A1D5X2C4|A0A1D5X2C4_WHEAT	62	2.5e-32	148.3	19.4	A0A1D5X2C4_WHEAT	Uncharacterized protein	SubName: Full=Uncharacterized protein {ECO:0000313|EnsemblPlants:TRIAE_CS42_4AL_TGACv1_289037_AA0963820.1};
TRINITY_DN22213_c0_g1_i5	tr|A0A1D6RZB1|A0A1D6RZB1_WHEAT	51	8.1e-14	86.7	17.9	A0A1D6RZB1_WHEAT	Uncharacterized protein	SubName: Full=Uncharacterized protein {ECO:0000313|EnsemblPlants:TRIAE_CS42_4BS_TGACv1_332515_AA1110440.1};
TRINITY_DN22213_c0_g1_i14	tr|R7WA00|R7WA00_AEGTA	110	6.2e-19	104	30.4	R7WA00_AEGTA	Uncharacterized protein	SubName: Full=Uncharacterized protein {ECO:0000313|EMBL:EMT19117.1, ECO:0000313|EnsemblPlants:EMT19117};
TRINITY_DN22213_c0_g1_i1	tr|R7WA00|R7WA00_AEGTA	39	2.2e-13	85.5	11.3	R7WA00_AEGTA	Uncharacterized protein	SubName: Full=Uncharacterized protein {ECO:0000313|EMBL:EMT19117.1, ECO:0000313|EnsemblPlants:EMT19117};
TRINITY_DN22213_c0_g1_i7	tr|A0A1D5X2C4|A0A1D5X2C4_WHEAT	62	2.7e-32	148.3	18.5	A0A1D5X2C4_WHEAT	Uncharacterized protein	SubName: Full=Uncharacterized protein {ECO:0000313|EnsemblPlants:TRIAE_CS42_4AL_TGACv1_289037_AA0963820.1};
TRINITY_DN22213_c0_g1_i11	tr|A0A1D6BBM1|A0A1D6BBM1_WHEAT	38	2.3e-09	71.6	15.4	A0A1D6BBM1_WHEAT	Uncharacterized protein	SubName: Full=Uncharacterized protein {ECO:0000313|EnsemblPlants:TRIAE_CS42_6DS_TGACv1_542484_AA1721970.1};
TRINITY_DN22213_c0_g1_i4	tr|R7WA00|R7WA00_AEGTA	39	2.2e-13	85.5	11	R7WA00_AEGTA	Uncharacterized protein	SubName: Full=Uncharacterized protein {ECO:0000313|EMBL:EMT19117.1, ECO:0000313|EnsemblPlants:EMT19117};
TRINITY_DN22213_c0_g1_i13	tr|A0A1D6BBM1|A0A1D6BBM1_WHEAT	36	6.4e-09	69.7	20.2	A0A1D6BBM1_WHEAT	Uncharacterized protein	SubName: Full=Uncharacterized protein {ECO:0000313|EnsemblPlants:TRIAE_CS42_6DS_TGACv1_542484_AA1721970.1};
TRINITY_DN22213_c0_g1_i10	tr|R7WA00|R7WA00_AEGTA	39	2.1e-13	85.5	11.7	R7WA00_AEGTA	Uncharacterized protein	SubName: Full=Uncharacterized protein {ECO:0000313|EMBL:EMT19117.1, ECO:0000313|EnsemblPlants:EMT19117};
TRINITY_DN22213_c0_g1_i3	tr|A0A1D6RZB1|A0A1D6RZB1_WHEAT	51	8.3e-14	86.7	17.5	A0A1D6RZB1_WHEAT	Uncharacterized protein	SubName: Full=Uncharacterized protein {ECO:0000313|EnsemblPlants:TRIAE_CS42_4BS_TGACv1_332515_AA1110440.1};
TRINITY_DN22213_c0_g1_i9	tr|A0A1D5X2C4|A0A1D5X2C4_WHEAT	62	7.7e-33	148.3	63.9	A0A1D5X2C4_WHEAT	Uncharacterized protein	SubName: Full=Uncharacterized protein {ECO:0000313|EnsemblPlants:TRIAE_CS42_4AL_TGACv1_289037_AA0963820.1};
TRINITY_DN22246_c0_g1_i3	tr|M8BD83|M8BD83_AEGTA	29	5.9e-08	66.2	19.5	M8BD83_AEGTA	Peroxisomal membrane protein PEX14	SubName: Full=Peroxisomal membrane protein PEX14 {ECO:0000313|EMBL:EMT04713.1, ECO:0000313|EnsemblPlants:EMT04713};
TRINITY_DN22246_c0_g1_i1	tr|M8BD83|M8BD83_AEGTA	29	6e-08	66.2	19.1	M8BD83_AEGTA	Peroxisomal membrane protein PEX14	SubName: Full=Peroxisomal membrane protein PEX14 {ECO:0000313|EMBL:EMT04713.1, ECO:0000313|EnsemblPlants:EMT04713};
TRINITY_DN22285_c0_g1_i2	tr|B7G4K6|B7G4K6_PHATC	165	1.1e-59	238.4	90.8	B7G4K6_PHATC	Predicted protein	SubName: Full=Predicted protein {ECO:0000313|EMBL:EEC46628.1};
TRINITY_DN22285_c0_g1_i1	tr|B7G4K6|B7G4K6_PHATC	165	1.1e-59	238.4	90.8	B7G4K6_PHATC	Predicted protein	SubName: Full=Predicted protein {ECO:0000313|EMBL:EEC46628.1};
TRINITY_DN22207_c0_g1_i2	tr|W5EIU5|W5EIU5_WHEAT	149	6e-37	163.7	45.1	W5EIU5_WHEAT	Uncharacterized protein	SubName: Full=Uncharacterized protein {ECO:0000313|EnsemblPlants:TRIAE_CS42_4DL_TGACv1_344268_AA1145680.1};
TRINITY_DN22207_c0_g1_i4	tr|M7YKM6|M7YKM6_TRIUA	149	1.3e-34	156	44.7	M7YKM6_TRIUA	Uncharacterized protein	SubName: Full=Uncharacterized protein {ECO:0000313|EMBL:EMS47441.1, ECO:0000313|EnsemblPlants:TRIUR3_34102-P1};
TRINITY_DN22207_c0_g1_i3	tr|W5EIU5|W5EIU5_WHEAT	149	1.9e-35	158.7	46.1	W5EIU5_WHEAT	Uncharacterized protein	SubName: Full=Uncharacterized protein {ECO:0000313|EnsemblPlants:TRIAE_CS42_4DL_TGACv1_344268_AA1145680.1};
TRINITY_DN22207_c0_g1_i1	tr|A0A1D5XM44|A0A1D5XM44_WHEAT	145	7.6e-48	199.9	44	A0A1D5XM44_WHEAT	Uncharacterized protein	SubName: Full=Uncharacterized protein {ECO:0000313|EnsemblPlants:TRIAE_CS42_4BL_TGACv1_321831_AA1066030.1};
TRINITY_DN22273_c0_g1_i1	tr|W5F663|W5F663_WHEAT	119	7.2e-57	228.4	99.7	W5F663_WHEAT	Uncharacterized protein	SubName: Full=Uncharacterized protein {ECO:0000313|EnsemblPlants:TRIAE_CS42_5AS_TGACv1_393745_AA1275650.2};
TRINITY_DN22279_c0_g1_i8	tr|A0A287TNW7|A0A287TNW7_HORVV	539	4.5e-298	1031.9	93.7	A0A287TNW7_HORVV	Uncharacterized protein	SubName: Full=Uncharacterized protein {ECO:0000313|EnsemblPlants:HORVU6Hr1G027220.19};
TRINITY_DN22279_c0_g1_i6	tr|A0A1D5YW38|A0A1D5YW38_WHEAT	157	2e-82	313.9	87.7	A0A1D5YW38_WHEAT	Uncharacterized protein	SubName: Full=Uncharacterized protein {ECO:0000313|EnsemblPlants:TRIAE_CS42_5AS_TGACv1_394618_AA1281300.1};
TRINITY_DN22279_c0_g1_i2	tr|A0A287TNW7|A0A287TNW7_HORVV	539	1.8e-302	1046.6	90.9	A0A287TNW7_HORVV	Uncharacterized protein	SubName: Full=Uncharacterized protein {ECO:0000313|EnsemblPlants:HORVU6Hr1G027220.19};
TRINITY_DN22279_c0_g1_i1	tr|A0A287TNW7|A0A287TNW7_HORVV	539	4.1e-299	1035.4	93.7	A0A287TNW7_HORVV	Uncharacterized protein	SubName: Full=Uncharacterized protein {ECO:0000313|EnsemblPlants:HORVU6Hr1G027220.19};
TRINITY_DN22279_c0_g1_i5	tr|A0A1D5TJF6|A0A1D5TJF6_WHEAT	462	3.6e-256	892.5	96	A0A1D5TJF6_WHEAT	ATP-dependent DNA helicase	RecName: Full=ATP-dependent DNA helicase {ECO:0000256|RuleBase:RU363044}; EC=3.6.4.12 {ECO:0000256|RuleBase:RU363044};
TRINITY_DN22279_c0_g1_i3	tr|A0A287TNW7|A0A287TNW7_HORVV	539	1.5e-301	1043.5	90.9	A0A287TNW7_HORVV	Uncharacterized protein	SubName: Full=Uncharacterized protein {ECO:0000313|EnsemblPlants:HORVU6Hr1G027220.19};
TRINITY_DN22279_c0_g1_i7	tr|A0A1D5TJF6|A0A1D5TJF6_WHEAT	462	2e-264	919.8	99.8	A0A1D5TJF6_WHEAT	ATP-dependent DNA helicase	RecName: Full=ATP-dependent DNA helicase {ECO:0000256|RuleBase:RU363044}; EC=3.6.4.12 {ECO:0000256|RuleBase:RU363044};
TRINITY_DN22279_c0_g1_i4	tr|A0A1D5TJF6|A0A1D5TJF6_WHEAT	309	3e-179	636.3	99.6	A0A1D5TJF6_WHEAT	ATP-dependent DNA helicase	RecName: Full=ATP-dependent DNA helicase {ECO:0000256|RuleBase:RU363044}; EC=3.6.4.12 {ECO:0000256|RuleBase:RU363044};
TRINITY_DN22279_c0_g2_i1	tr|A0A1D6A0K4|A0A1D6A0K4_WHEAT	498	7.1e-259	902.1	66.1	A0A1D6A0K4_WHEAT	ATP-dependent DNA helicase	RecName: Full=ATP-dependent DNA helicase {ECO:0000256|RuleBase:RU363044}; EC=3.6.4.12 {ECO:0000256|RuleBase:RU363044};
TRINITY_DN22279_c1_g1_i2	tr|A0A1D6A0K4|A0A1D6A0K4_WHEAT	72	4.1e-30	139.8	49.4	A0A1D6A0K4_WHEAT	ATP-dependent DNA helicase	RecName: Full=ATP-dependent DNA helicase {ECO:0000256|RuleBase:RU363044}; EC=3.6.4.12 {ECO:0000256|RuleBase:RU363044};
TRINITY_DN22279_c1_g1_i1	tr|A0A1D5YD27|A0A1D5YD27_WHEAT	80	5.3e-33	149.4	53.5	A0A1D5YD27_WHEAT	ATP-dependent DNA helicase	RecName: Full=ATP-dependent DNA helicase {ECO:0000256|RuleBase:RU363044}; EC=3.6.4.12 {ECO:0000256|RuleBase:RU363044};
TRINITY_DN22279_c2_g1_i2	tr|A0A1D5SM33|A0A1D5SM33_WHEAT	62	5.6e-18	101.7	9.5	A0A1D5SM33_WHEAT	Uncharacterized protein	SubName: Full=Uncharacterized protein {ECO:0000313|EnsemblPlants:TRIAE_CS42_1BS_TGACv1_050262_AA0169750.1};
TRINITY_DN22279_c2_g1_i3	tr|A0A1D5SM33|A0A1D5SM33_WHEAT	62	5.5e-18	101.7	9.5	A0A1D5SM33_WHEAT	Uncharacterized protein	SubName: Full=Uncharacterized protein {ECO:0000313|EnsemblPlants:TRIAE_CS42_1BS_TGACv1_050262_AA0169750.1};
TRINITY_DN22279_c2_g1_i1	tr|A0A1D5SM33|A0A1D5SM33_WHEAT	62	1.1e-18	101.7	49.6	A0A1D5SM33_WHEAT	Uncharacterized protein	SubName: Full=Uncharacterized protein {ECO:0000313|EnsemblPlants:TRIAE_CS42_1BS_TGACv1_050262_AA0169750.1};
TRINITY_DN22279_c2_g1_i8	tr|A0A1D5SM33|A0A1D5SM33_WHEAT	61	4.4e-22	112.8	50.8	A0A1D5SM33_WHEAT	Uncharacterized protein	SubName: Full=Uncharacterized protein {ECO:0000313|EnsemblPlants:TRIAE_CS42_1BS_TGACv1_050262_AA0169750.1};
TRINITY_DN22279_c2_g1_i7	tr|M8BC16|M8BC16_AEGTA	54	0.0001	54.7	60.7	M8BC16_AEGTA	Uncharacterized protein	SubName: Full=Uncharacterized protein {ECO:0000313|EMBL:EMT04278.1, ECO:0000313|EnsemblPlants:EMT04278};
TRINITY_DN22279_c2_g1_i6	tr|M8BC16|M8BC16_AEGTA	55	1.8e-21	110.9	44	M8BC16_AEGTA	Uncharacterized protein	SubName: Full=Uncharacterized protein {ECO:0000313|EMBL:EMT04278.1, ECO:0000313|EnsemblPlants:EMT04278};
TRINITY_DN22244_c0_g1_i5	tr|A0A1D5Y0G2|A0A1D5Y0G2_WHEAT	33	2.4e-11	78.6	10.7	A0A1D5Y0G2_WHEAT	Uncharacterized protein	SubName: Full=Uncharacterized protein {ECO:0000313|EnsemblPlants:TRIAE_CS42_4DL_TGACv1_343514_AA1135720.5};
TRINITY_DN22244_c0_g1_i4	tr|A0A1D5Y0G2|A0A1D5Y0G2_WHEAT	33	2.2e-11	78.6	11.5	A0A1D5Y0G2_WHEAT	Uncharacterized protein	SubName: Full=Uncharacterized protein {ECO:0000313|EnsemblPlants:TRIAE_CS42_4DL_TGACv1_343514_AA1135720.5};
TRINITY_DN22208_c0_g3_i2	tr|A0A1D5XNI3|A0A1D5XNI3_WHEAT	66	3e-29	138.3	18	A0A1D5XNI3_WHEAT	Uncharacterized protein	SubName: Full=Uncharacterized protein {ECO:0000313|EnsemblPlants:TRIAE_CS42_4BL_TGACv1_322622_AA1072330.1};
TRINITY_DN22208_c0_g4_i1	tr|M7ZR81|M7ZR81_TRIUA	38	7.7e-09	70.1	13.6	M7ZR81_TRIUA	Uncharacterized protein	SubName: Full=Uncharacterized protein {ECO:0000313|EMBL:EMS62121.1, ECO:0000313|EnsemblPlants:TRIUR3_01352-P1};
TRINITY_DN22228_c0_g1_i1	tr|M7YYQ0|M7YYQ0_TRIUA	21	0.00025	53.1	29.3	M7YYQ0_TRIUA	Uncharacterized protein	SubName: Full=Uncharacterized protein {ECO:0000313|EMBL:EMS45190.1, ECO:0000313|EnsemblPlants:TRIUR3_14648-P1};
TRINITY_DN22228_c0_g2_i2	tr|M7YKS1|M7YKS1_TRIUA	57	7.5e-10	73.6	18.9	M7YKS1_TRIUA	TATA-box-binding protein 2	SubName: Full=TATA-box-binding protein 2 {ECO:0000313|EMBL:EMS51073.1, ECO:0000313|EnsemblPlants:TRIUR3_31414-P1};
TRINITY_DN22228_c0_g2_i7	tr|M7YKS1|M7YKS1_TRIUA	47	5.4e-10	73.2	28.5	M7YKS1_TRIUA	TATA-box-binding protein 2	SubName: Full=TATA-box-binding protein 2 {ECO:0000313|EMBL:EMS51073.1, ECO:0000313|EnsemblPlants:TRIUR3_31414-P1};
TRINITY_DN22228_c0_g2_i8	tr|M7YKS1|M7YKS1_TRIUA	51	9.4e-10	73.2	17.5	M7YKS1_TRIUA	TATA-box-binding protein 2	SubName: Full=TATA-box-binding protein 2 {ECO:0000313|EMBL:EMS51073.1, ECO:0000313|EnsemblPlants:TRIUR3_31414-P1};
TRINITY_DN22228_c0_g2_i9	tr|M7YKS1|M7YKS1_TRIUA	51	8.3e-10	73.9	11.8	M7YKS1_TRIUA	TATA-box-binding protein 2	SubName: Full=TATA-box-binding protein 2 {ECO:0000313|EMBL:EMS51073.1, ECO:0000313|EnsemblPlants:TRIUR3_31414-P1};
TRINITY_DN22228_c0_g2_i1	tr|M7YKS1|M7YKS1_TRIUA	70	3.4e-13	83.6	49.5	M7YKS1_TRIUA	TATA-box-binding protein 2	SubName: Full=TATA-box-binding protein 2 {ECO:0000313|EMBL:EMS51073.1, ECO:0000313|EnsemblPlants:TRIUR3_31414-P1};
TRINITY_DN22228_c0_g2_i6	tr|M7YKS1|M7YKS1_TRIUA	51	7.8e-10	73.2	21.3	M7YKS1_TRIUA	TATA-box-binding protein 2	SubName: Full=TATA-box-binding protein 2 {ECO:0000313|EMBL:EMS51073.1, ECO:0000313|EnsemblPlants:TRIUR3_31414-P1};
TRINITY_DN22228_c0_g2_i11	tr|M7YKS1|M7YKS1_TRIUA	88	8.3e-26	126.3	34.2	M7YKS1_TRIUA	TATA-box-binding protein 2	SubName: Full=TATA-box-binding protein 2 {ECO:0000313|EMBL:EMS51073.1, ECO:0000313|EnsemblPlants:TRIUR3_31414-P1};
TRINITY_DN22228_c0_g2_i3	tr|M7YKS1|M7YKS1_TRIUA	51	5.5e-10	73.9	17.5	M7YKS1_TRIUA	TATA-box-binding protein 2	SubName: Full=TATA-box-binding protein 2 {ECO:0000313|EMBL:EMS51073.1, ECO:0000313|EnsemblPlants:TRIUR3_31414-P1};
TRINITY_DN22290_c0_g1_i2	tr|A0A1D5VGP9|A0A1D5VGP9_WHEAT	640	1.7e-227	797.7	89.1	A0A1D5VGP9_WHEAT	Uncharacterized protein	SubName: Full=Uncharacterized protein {ECO:0000313|EnsemblPlants:TRIAE_CS42_3AS_TGACv1_210635_AA0676090.1};
TRINITY_DN22290_c0_g1_i8	tr|A0A1D5WUN6|A0A1D5WUN6_WHEAT	624	7.3e-234	818.9	89.2	A0A1D5WUN6_WHEAT	Uncharacterized protein	SubName: Full=Uncharacterized protein {ECO:0000313|EnsemblPlants:TRIAE_CS42_3DS_TGACv1_272585_AA0922690.1};
TRINITY_DN22290_c0_g1_i11	tr|A0A1D5VGP9|A0A1D5VGP9_WHEAT	640	5.2e-231	809.7	75.9	A0A1D5VGP9_WHEAT	Uncharacterized protein	SubName: Full=Uncharacterized protein {ECO:0000313|EnsemblPlants:TRIAE_CS42_3AS_TGACv1_210635_AA0676090.1};
TRINITY_DN22290_c0_g1_i4	tr|A0A1D5VGP9|A0A1D5VGP9_WHEAT	640	6e-228	799.3	89.2	A0A1D5VGP9_WHEAT	Uncharacterized protein	SubName: Full=Uncharacterized protein {ECO:0000313|EnsemblPlants:TRIAE_CS42_3AS_TGACv1_210635_AA0676090.1};
TRINITY_DN22290_c0_g1_i7	tr|A0A1D5VGP9|A0A1D5VGP9_WHEAT	640	5.2e-231	809.7	75.9	A0A1D5VGP9_WHEAT	Uncharacterized protein	SubName: Full=Uncharacterized protein {ECO:0000313|EnsemblPlants:TRIAE_CS42_3AS_TGACv1_210635_AA0676090.1};
TRINITY_DN22290_c0_g1_i1	tr|A0A1D5VGP9|A0A1D5VGP9_WHEAT	161	2.1e-51	210.7	99.4	A0A1D5VGP9_WHEAT	Uncharacterized protein	SubName: Full=Uncharacterized protein {ECO:0000313|EnsemblPlants:TRIAE_CS42_3AS_TGACv1_210635_AA0676090.1};
TRINITY_DN22233_c0_g1_i2	tr|M8AK62|M8AK62_AEGTA	338	2.7e-197	696.4	98.4	M8AK62_AEGTA	Cytochrome P450 86A1	SubName: Full=Cytochrome P450 86A1 {ECO:0000313|EMBL:EMT04876.1, ECO:0000313|EnsemblPlants:EMT04876};
TRINITY_DN22233_c0_g1_i1	tr|A0A1D5UE35|A0A1D5UE35_WHEAT	255	2.6e-141	510	99.7	A0A1D5UE35_WHEAT	Uncharacterized protein	SubName: Full=Uncharacterized protein {ECO:0000313|EnsemblPlants:TRIAE_CS42_2BS_TGACv1_147740_AA0487220.1};
TRINITY_DN22233_c0_g2_i1	tr|A0A1D6D2E6|A0A1D6D2E6_WHEAT	353	2.5e-206	726.5	99.9	A0A1D6D2E6_WHEAT	Uncharacterized protein	SubName: Full=Uncharacterized protein {ECO:0000313|EnsemblPlants:TRIAE_CS42_7DS_TGACv1_622964_AA2047910.1};
TRINITY_DN22214_c0_g1_i13	tr|A0A1D5ZU40|A0A1D5ZU40_WHEAT	381	5.8e-144	519.6	86.2	A0A1D5ZU40_WHEAT	Uncharacterized protein	SubName: Full=Uncharacterized protein {ECO:0000313|EnsemblPlants:TRIAE_CS42_5DL_TGACv1_434920_AA1443560.1};
TRINITY_DN22214_c0_g1_i5	tr|A0A1D6S1G2|A0A1D6S1G2_WHEAT	375	8e-186	658.7	84.3	A0A1D6S1G2_WHEAT	Uncharacterized protein	SubName: Full=Uncharacterized protein {ECO:0000313|EnsemblPlants:TRIAE_CS42_5AL_TGACv1_375966_AA1229630.1};
TRINITY_DN22214_c0_g1_i10	tr|A0A1D6S1G2|A0A1D6S1G2_WHEAT	377	3.2e-166	593.6	84.3	A0A1D6S1G2_WHEAT	Uncharacterized protein	SubName: Full=Uncharacterized protein {ECO:0000313|EnsemblPlants:TRIAE_CS42_5AL_TGACv1_375966_AA1229630.1};
TRINITY_DN22214_c0_g1_i8	tr|A0A1D5YYJ7|A0A1D5YYJ7_WHEAT	90	1.6e-43	184.5	57	A0A1D5YYJ7_WHEAT	Uncharacterized protein	SubName: Full=Uncharacterized protein {ECO:0000313|EnsemblPlants:TRIAE_CS42_5BL_TGACv1_404303_AA1294700.2};
TRINITY_DN22214_c0_g1_i4	tr|A0A1D6S1G2|A0A1D6S1G2_WHEAT	319	5.7e-156	559.3	83.8	A0A1D6S1G2_WHEAT	Uncharacterized protein	SubName: Full=Uncharacterized protein {ECO:0000313|EnsemblPlants:TRIAE_CS42_5AL_TGACv1_375966_AA1229630.1};
TRINITY_DN22214_c0_g1_i2	tr|A0A1D6S1G2|A0A1D6S1G2_WHEAT	375	2.9e-183	650.2	84.3	A0A1D6S1G2_WHEAT	Uncharacterized protein	SubName: Full=Uncharacterized protein {ECO:0000313|EnsemblPlants:TRIAE_CS42_5AL_TGACv1_375966_AA1229630.1};
TRINITY_DN22214_c0_g1_i7	tr|A0A1D6S1G2|A0A1D6S1G2_WHEAT	375	2e-157	564.3	85	A0A1D6S1G2_WHEAT	Uncharacterized protein	SubName: Full=Uncharacterized protein {ECO:0000313|EnsemblPlants:TRIAE_CS42_5AL_TGACv1_375966_AA1229630.1};
TRINITY_DN22214_c0_g1_i11	tr|A0A1D6S1G2|A0A1D6S1G2_WHEAT	375	1.4e-185	657.9	84.9	A0A1D6S1G2_WHEAT	Uncharacterized protein	SubName: Full=Uncharacterized protein {ECO:0000313|EnsemblPlants:TRIAE_CS42_5AL_TGACv1_375966_AA1229630.1};
TRINITY_DN22214_c1_g1_i4	tr|A0A1D6CVB5|A0A1D6CVB5_WHEAT	172	3.2e-30	140.6	87.6	A0A1D6CVB5_WHEAT	Uncharacterized protein	SubName: Full=Uncharacterized protein {ECO:0000313|EnsemblPlants:TRIAE_CS42_7DL_TGACv1_606098_AA2009200.1};
TRINITY_DN22214_c1_g1_i3	tr|A0A1D6CVB5|A0A1D6CVB5_WHEAT	172	3.2e-30	141	67.6	A0A1D6CVB5_WHEAT	Uncharacterized protein	SubName: Full=Uncharacterized protein {ECO:0000313|EnsemblPlants:TRIAE_CS42_7DL_TGACv1_606098_AA2009200.1};
TRINITY_DN22214_c1_g1_i2	tr|A0A1Q3BZI4|A0A1Q3BZI4_CEPFO	61	7.8e-21	109	41.6	A0A1Q3BZI4_CEPFO	IQ domain-containing protein/DUF4005 domain-containing protein	SubName: Full=IQ domain-containing protein/DUF4005 domain-containing protein {ECO:0000313|EMBL:GAV73248.1};
TRINITY_DN22265_c0_g1_i1	tr|A0A1D6S6D0|A0A1D6S6D0_WHEAT	82	7.4e-37	161.4	99.2	A0A1D6S6D0_WHEAT	Cellulose synthase	RecName: Full=Cellulose synthase {ECO:0000256|RuleBase:RU361116}; EC=2.4.1.12 {ECO:0000256|RuleBase:RU361116};
TRINITY_DN22219_c0_g1_i1	tr|A0A1D6S6T3|A0A1D6S6T3_WHEAT	683	0	1335.5	88.2	A0A1D6S6T3_WHEAT	Uncharacterized protein	SubName: Full=Uncharacterized protein {ECO:0000313|EnsemblPlants:TRIAE_CS42_5DL_TGACv1_434098_AA1429130.1};
TRINITY_DN22219_c0_g1_i2	tr|W5FCH3|W5FCH3_WHEAT	631	0	1233	96.1	W5FCH3_WHEAT	Uncharacterized protein	SubName: Full=Uncharacterized protein {ECO:0000313|EnsemblPlants:TRIAE_CS42_5BL_TGACv1_410711_AA1367180.1};
TRINITY_DN22219_c0_g1_i5	tr|A0A1D6S6T3|A0A1D6S6T3_WHEAT	632	0	1228.4	87.3	A0A1D6S6T3_WHEAT	Uncharacterized protein	SubName: Full=Uncharacterized protein {ECO:0000313|EnsemblPlants:TRIAE_CS42_5DL_TGACv1_434098_AA1429130.1};
TRINITY_DN22219_c0_g1_i3	tr|W5FCH3|W5FCH3_WHEAT	154	2.6e-75	290	99.8	W5FCH3_WHEAT	Uncharacterized protein	SubName: Full=Uncharacterized protein {ECO:0000313|EnsemblPlants:TRIAE_CS42_5BL_TGACv1_410711_AA1367180.1};
TRINITY_DN22219_c0_g1_i6	tr|A0A1D6S6T3|A0A1D6S6T3_WHEAT	465	2.3e-270	939.9	83.5	A0A1D6S6T3_WHEAT	Uncharacterized protein	SubName: Full=Uncharacterized protein {ECO:0000313|EnsemblPlants:TRIAE_CS42_5DL_TGACv1_434098_AA1429130.1};
TRINITY_DN22219_c0_g1_i7	tr|A0A1D6S6T3|A0A1D6S6T3_WHEAT	466	9.9e-258	897.9	83.6	A0A1D6S6T3_WHEAT	Uncharacterized protein	SubName: Full=Uncharacterized protein {ECO:0000313|EnsemblPlants:TRIAE_CS42_5DL_TGACv1_434098_AA1429130.1};
TRINITY_DN22219_c0_g1_i4	tr|A0A1D6S6T3|A0A1D6S6T3_WHEAT	808	0	1526.5	89.8	A0A1D6S6T3_WHEAT	Uncharacterized protein	SubName: Full=Uncharacterized protein {ECO:0000313|EnsemblPlants:TRIAE_CS42_5DL_TGACv1_434098_AA1429130.1};
TRINITY_DN22219_c0_g2_i1	tr|M8BJ76|M8BJ76_AEGTA	83	7e-35	154.8	99.2	M8BJ76_AEGTA	Disease resistance protein RPM1	SubName: Full=Disease resistance protein RPM1 {ECO:0000313|EMBL:EMT21773.1, ECO:0000313|EnsemblPlants:EMT21773};
TRINITY_DN22232_c0_g1_i2	tr|A0A1D6BSV4|A0A1D6BSV4_WHEAT	144	3.3e-72	279.6	98.9	A0A1D6BSV4_WHEAT	Uncharacterized protein	SubName: Full=Uncharacterized protein {ECO:0000313|EnsemblPlants:TRIAE_CS42_7AS_TGACv1_569253_AA1811500.1};
TRINITY_DN22232_c0_g1_i1	tr|A0A1D6BSV4|A0A1D6BSV4_WHEAT	223	2.3e-125	456.8	99.9	A0A1D6BSV4_WHEAT	Uncharacterized protein	SubName: Full=Uncharacterized protein {ECO:0000313|EnsemblPlants:TRIAE_CS42_7AS_TGACv1_569253_AA1811500.1};
TRINITY_DN22257_c0_g1_i4	tr|W5ELX3|W5ELX3_WHEAT	111	1.1e-52	214.9	68	W5ELX3_WHEAT	Patatin	RecName: Full=Patatin {ECO:0000256|RuleBase:RU361262}; EC=3.1.1.- {ECO:0000256|RuleBase:RU361262};
TRINITY_DN22257_c0_g1_i1	tr|W5ELX3|W5ELX3_WHEAT	111	2.6e-52	213.8	64.7	W5ELX3_WHEAT	Patatin	RecName: Full=Patatin {ECO:0000256|RuleBase:RU361262}; EC=3.1.1.- {ECO:0000256|RuleBase:RU361262};
TRINITY_DN22257_c0_g1_i3	tr|W5ELX3|W5ELX3_WHEAT	111	1.5e-52	214.5	68.9	W5ELX3_WHEAT	Patatin	RecName: Full=Patatin {ECO:0000256|RuleBase:RU361262}; EC=3.1.1.- {ECO:0000256|RuleBase:RU361262};
TRINITY_DN22257_c0_g2_i3	tr|W5A8C2|W5A8C2_WHEAT	404	2.3e-235	823.9	56.3	W5A8C2_WHEAT	Uncharacterized protein	SubName: Full=Uncharacterized protein {ECO:0000313|EnsemblPlants:TRIAE_CS42_1BS_TGACv1_051824_AA0181020.1};
TRINITY_DN22257_c0_g2_i2	tr|C5YMZ6|C5YMZ6_SORBI	83	6.7e-23	117.1	24.2	C5YMZ6_SORBI	Uncharacterized protein	SubName: Full=Uncharacterized protein {ECO:0000313|EMBL:EES14508.1};
TRINITY_DN22257_c0_g2_i4	tr|W5A8C2|W5A8C2_WHEAT	372	1e-215	758.4	62.6	W5A8C2_WHEAT	Uncharacterized protein	SubName: Full=Uncharacterized protein {ECO:0000313|EnsemblPlants:TRIAE_CS42_1BS_TGACv1_051824_AA0181020.1};
TRINITY_DN22257_c0_g2_i1	tr|W5A8C2|W5A8C2_WHEAT	405	2.9e-236	827	54.5	W5A8C2_WHEAT	Uncharacterized protein	SubName: Full=Uncharacterized protein {ECO:0000313|EnsemblPlants:TRIAE_CS42_1BS_TGACv1_051824_AA0181020.1};
TRINITY_DN22295_c0_g1_i1	tr|J7GHS0|J7GHS0_HORVV	87	6.3e-50	204.9	98.5	J7GHS0_HORVV	Fructan-fructan 1-fructosyltransferase	SubName: Full=Fructan-fructan 1-fructosyltransferase {ECO:0000313|EMBL:AFP72239.1}; EC=2.4.1.100 {ECO:0000313|EMBL:AFP72239.1};
TRINITY_DN22235_c0_g1_i5	tr|A0A1D5YYJ8|A0A1D5YYJ8_WHEAT	46	3.7e-15	91.3	14.3	A0A1D5YYJ8_WHEAT	Uncharacterized protein	SubName: Full=Uncharacterized protein {ECO:0000313|EnsemblPlants:TRIAE_CS42_5BL_TGACv1_404306_AA1294760.1};
TRINITY_DN22235_c0_g1_i4	tr|A0A1D5YYJ8|A0A1D5YYJ8_WHEAT	53	1.2e-19	106.3	14.9	A0A1D5YYJ8_WHEAT	Uncharacterized protein	SubName: Full=Uncharacterized protein {ECO:0000313|EnsemblPlants:TRIAE_CS42_5BL_TGACv1_404306_AA1294760.1};
TRINITY_DN22235_c0_g1_i3	tr|A0A1D5YYJ8|A0A1D5YYJ8_WHEAT	77	2.3e-11	78.6	26.3	A0A1D5YYJ8_WHEAT	Uncharacterized protein	SubName: Full=Uncharacterized protein {ECO:0000313|EnsemblPlants:TRIAE_CS42_5BL_TGACv1_404306_AA1294760.1};
TRINITY_DN22235_c0_g1_i7	tr|A0A1D5YYJ8|A0A1D5YYJ8_WHEAT	45	2e-11	79	13.2	A0A1D5YYJ8_WHEAT	Uncharacterized protein	SubName: Full=Uncharacterized protein {ECO:0000313|EnsemblPlants:TRIAE_CS42_5BL_TGACv1_404306_AA1294760.1};
TRINITY_DN22235_c0_g1_i1	tr|A0A1D5YYJ8|A0A1D5YYJ8_WHEAT	45	9.7e-11	75.1	39.5	A0A1D5YYJ8_WHEAT	Uncharacterized protein	SubName: Full=Uncharacterized protein {ECO:0000313|EnsemblPlants:TRIAE_CS42_5BL_TGACv1_404306_AA1294760.1};
TRINITY_DN22235_c0_g1_i2	tr|A0A1D5YYJ8|A0A1D5YYJ8_WHEAT	49	1.3e-13	86.3	13.8	A0A1D5YYJ8_WHEAT	Uncharacterized protein	SubName: Full=Uncharacterized protein {ECO:0000313|EnsemblPlants:TRIAE_CS42_5BL_TGACv1_404306_AA1294760.1};
TRINITY_DN22235_c0_g1_i6	tr|A0A1D5YYJ8|A0A1D5YYJ8_WHEAT	53	6.1e-20	107.1	17.7	A0A1D5YYJ8_WHEAT	Uncharacterized protein	SubName: Full=Uncharacterized protein {ECO:0000313|EnsemblPlants:TRIAE_CS42_5BL_TGACv1_404306_AA1294760.1};
TRINITY_DN22229_c0_g1_i5	tr|T1N357|T1N357_TRIUA	503	3.1e-243	850.1	69.7	T1N357_TRIUA	Uncharacterized protein	SubName: Full=Uncharacterized protein {ECO:0000313|EnsemblPlants:TRIUR3_24819-P1};
TRINITY_DN22229_c0_g1_i9	tr|T1N357|T1N357_TRIUA	503	3e-243	850.9	41.7	T1N357_TRIUA	Uncharacterized protein	SubName: Full=Uncharacterized protein {ECO:0000313|EnsemblPlants:TRIUR3_24819-P1};
TRINITY_DN22229_c0_g1_i8	tr|T1N357|T1N357_TRIUA	503	1.1e-241	844.7	81.8	T1N357_TRIUA	Uncharacterized protein	SubName: Full=Uncharacterized protein {ECO:0000313|EnsemblPlants:TRIUR3_24819-P1};
TRINITY_DN22229_c0_g1_i3	tr|T1N357|T1N357_TRIUA	503	2.9e-243	850.1	73	T1N357_TRIUA	Uncharacterized protein	SubName: Full=Uncharacterized protein {ECO:0000313|EnsemblPlants:TRIUR3_24819-P1};
TRINITY_DN22229_c0_g1_i4	tr|T1N357|T1N357_TRIUA	503	5.9e-240	839.7	48.6	T1N357_TRIUA	Uncharacterized protein	SubName: Full=Uncharacterized protein {ECO:0000313|EnsemblPlants:TRIUR3_24819-P1};
TRINITY_DN22224_c0_g1_i1	tr|A0A1D5SCV3|A0A1D5SCV3_WHEAT	73	9.7e-36	157.5	98.6	A0A1D5SCV3_WHEAT	Uncharacterized protein	SubName: Full=Uncharacterized protein {ECO:0000313|EnsemblPlants:TRIAE_CS42_1BL_TGACv1_031778_AA0120460.1};
TRINITY_DN22230_c0_g1_i3	tr|M8BL58|M8BL58_AEGTA	93	1.2e-43	184.1	99.6	M8BL58_AEGTA	Phosphoserine phosphatase, chloroplastic	SubName: Full=Phosphoserine phosphatase, chloroplastic {ECO:0000313|EMBL:EMT07514.1, ECO:0000313|EnsemblPlants:EMT07514};
TRINITY_DN22230_c0_g1_i2	tr|A0A1D5U9F8|A0A1D5U9F8_WHEAT	216	4e-114	419.5	99.1	A0A1D5U9F8_WHEAT	Uncharacterized protein	SubName: Full=Uncharacterized protein {ECO:0000313|EnsemblPlants:TRIAE_CS42_2BS_TGACv1_146348_AA0463170.1};
TRINITY_DN22230_c0_g1_i1	tr|A0A1D6BXC6|A0A1D6BXC6_WHEAT	83	1.4e-38	167.2	99.2	A0A1D6BXC6_WHEAT	Uncharacterized protein	SubName: Full=Uncharacterized protein {ECO:0000313|EnsemblPlants:TRIAE_CS42_7AS_TGACv1_570269_AA1833130.1};
TRINITY_DN22230_c0_g1_i5	tr|A0A1D5U9F8|A0A1D5U9F8_WHEAT	216	4e-114	419.5	99.1	A0A1D5U9F8_WHEAT	Uncharacterized protein	SubName: Full=Uncharacterized protein {ECO:0000313|EnsemblPlants:TRIAE_CS42_2BS_TGACv1_146348_AA0463170.1};
TRINITY_DN22230_c0_g1_i4	tr|A0A1D5U9F8|A0A1D5U9F8_WHEAT	216	4e-114	419.5	99.1	A0A1D5U9F8_WHEAT	Uncharacterized protein	SubName: Full=Uncharacterized protein {ECO:0000313|EnsemblPlants:TRIAE_CS42_2BS_TGACv1_146348_AA0463170.1};
TRINITY_DN22209_c0_g1_i33	tr|A0A1D5SH94|A0A1D5SH94_WHEAT	41	5.3e-09	70.9	12.4	A0A1D5SH94_WHEAT	Uncharacterized protein	SubName: Full=Uncharacterized protein {ECO:0000313|EnsemblPlants:TRIAE_CS42_1BL_TGACv1_033507_AA0139970.2};
TRINITY_DN22209_c0_g1_i16	tr|A0A1D5RSX8|A0A1D5RSX8_WHEAT	71	1.4e-21	114.4	6.6	A0A1D5RSX8_WHEAT	Uncharacterized protein	SubName: Full=Uncharacterized protein {ECO:0000313|EnsemblPlants:TRIAE_CS42_1AL_TGACv1_000878_AA0020870.1};
TRINITY_DN22209_c0_g1_i6	tr|A0A1D5RSX8|A0A1D5RSX8_WHEAT	71	1.4e-21	114.4	6.6	A0A1D5RSX8_WHEAT	Uncharacterized protein	SubName: Full=Uncharacterized protein {ECO:0000313|EnsemblPlants:TRIAE_CS42_1AL_TGACv1_000878_AA0020870.1};
TRINITY_DN22209_c0_g1_i4	tr|A0A1D5RSX8|A0A1D5RSX8_WHEAT	71	1.4e-21	114.4	6.5	A0A1D5RSX8_WHEAT	Uncharacterized protein	SubName: Full=Uncharacterized protein {ECO:0000313|EnsemblPlants:TRIAE_CS42_1AL_TGACv1_000878_AA0020870.1};
TRINITY_DN22209_c0_g1_i1	tr|A0A1D6C0D6|A0A1D6C0D6_WHEAT	45	6.5e-11	78.2	6.9	A0A1D6C0D6_WHEAT	Uncharacterized protein	SubName: Full=Uncharacterized protein {ECO:0000313|EnsemblPlants:TRIAE_CS42_7AS_TGACv1_571267_AA1846440.1};
TRINITY_DN22209_c0_g1_i17	tr|A0A1D5RSX8|A0A1D5RSX8_WHEAT	71	1.3e-21	114.4	6.7	A0A1D5RSX8_WHEAT	Uncharacterized protein	SubName: Full=Uncharacterized protein {ECO:0000313|EnsemblPlants:TRIAE_CS42_1AL_TGACv1_000878_AA0020870.1};
TRINITY_DN22209_c0_g1_i21	tr|A0A1D5SH94|A0A1D5SH94_WHEAT	41	4.2e-09	70.9	15.5	A0A1D5SH94_WHEAT	Uncharacterized protein	SubName: Full=Uncharacterized protein {ECO:0000313|EnsemblPlants:TRIAE_CS42_1BL_TGACv1_033507_AA0139970.2};
TRINITY_DN22209_c0_g1_i3	tr|A0A1D6C0D6|A0A1D6C0D6_WHEAT	45	4.6e-11	78.2	9.9	A0A1D6C0D6_WHEAT	Uncharacterized protein	SubName: Full=Uncharacterized protein {ECO:0000313|EnsemblPlants:TRIAE_CS42_7AS_TGACv1_571267_AA1846440.1};
TRINITY_DN22209_c0_g1_i9	tr|A0A1D6C0D6|A0A1D6C0D6_WHEAT	45	4.8e-11	78.2	9.4	A0A1D6C0D6_WHEAT	Uncharacterized protein	SubName: Full=Uncharacterized protein {ECO:0000313|EnsemblPlants:TRIAE_CS42_7AS_TGACv1_571267_AA1846440.1};
TRINITY_DN22209_c0_g1_i11	tr|A0A1D6C0D6|A0A1D6C0D6_WHEAT	45	6.3e-11	78.2	7.2	A0A1D6C0D6_WHEAT	Uncharacterized protein	SubName: Full=Uncharacterized protein {ECO:0000313|EnsemblPlants:TRIAE_CS42_7AS_TGACv1_571267_AA1846440.1};
TRINITY_DN22209_c0_g1_i35	tr|A0A1D5RSX8|A0A1D5RSX8_WHEAT	71	1.4e-21	114.4	6.6	A0A1D5RSX8_WHEAT	Uncharacterized protein	SubName: Full=Uncharacterized protein {ECO:0000313|EnsemblPlants:TRIAE_CS42_1AL_TGACv1_000878_AA0020870.1};
TRINITY_DN22209_c0_g1_i24	tr|A0A1D5RSX8|A0A1D5RSX8_WHEAT	71	1.4e-21	114.4	6.5	A0A1D5RSX8_WHEAT	Uncharacterized protein	SubName: Full=Uncharacterized protein {ECO:0000313|EnsemblPlants:TRIAE_CS42_1AL_TGACv1_000878_AA0020870.1};
TRINITY_DN22209_c0_g3_i3	tr|M8A1A6|M8A1A6_TRIUA	74	2.8e-15	92	16.7	M8A1A6_TRIUA	ABC transporter G family member 22	SubName: Full=ABC transporter G family member 22 {ECO:0000313|EMBL:EMS65761.1, ECO:0000313|EnsemblPlants:TRIUR3_02106-P1};
TRINITY_DN22291_c0_g1_i1	tr|A0A1D6AW49|A0A1D6AW49_WHEAT	532	1.9e-306	1060.4	58	A0A1D6AW49_WHEAT	Uncharacterized protein	SubName: Full=Uncharacterized protein {ECO:0000313|EnsemblPlants:TRIAE_CS42_6BS_TGACv1_513422_AA1641120.1};
TRINITY_DN22291_c0_g1_i2	tr|A0A1D6AW49|A0A1D6AW49_WHEAT	532	1.8e-306	1060.4	61.2	A0A1D6AW49_WHEAT	Uncharacterized protein	SubName: Full=Uncharacterized protein {ECO:0000313|EnsemblPlants:TRIAE_CS42_6BS_TGACv1_513422_AA1641120.1};
TRINITY_DN22298_c0_g1_i4	tr|M7Z7D8|M7Z7D8_TRIUA	54	1.5e-15	92	23.7	M7Z7D8_TRIUA	Exonuclease 3'-5' domain-containing protein 1	SubName: Full=Exonuclease 3'-5' domain-containing protein 1 {ECO:0000313|EMBL:EMS59083.1, ECO:0000313|EnsemblPlants:TRIUR3_33970-P1};
TRINITY_DN22298_c0_g1_i8	tr|M7Z7D8|M7Z7D8_TRIUA	127	3.2e-53	216.9	69.2	M7Z7D8_TRIUA	Exonuclease 3'-5' domain-containing protein 1	SubName: Full=Exonuclease 3'-5' domain-containing protein 1 {ECO:0000313|EMBL:EMS59083.1, ECO:0000313|EnsemblPlants:TRIUR3_33970-P1};
TRINITY_DN22298_c0_g1_i5	tr|M7Z7D8|M7Z7D8_TRIUA	89	9.1e-34	151.8	70.1	M7Z7D8_TRIUA	Exonuclease 3'-5' domain-containing protein 1	SubName: Full=Exonuclease 3'-5' domain-containing protein 1 {ECO:0000313|EMBL:EMS59083.1, ECO:0000313|EnsemblPlants:TRIUR3_33970-P1};
TRINITY_DN22298_c0_g1_i6	tr|M7Z7D8|M7Z7D8_TRIUA	54	1.2e-15	91.7	39.1	M7Z7D8_TRIUA	Exonuclease 3'-5' domain-containing protein 1	SubName: Full=Exonuclease 3'-5' domain-containing protein 1 {ECO:0000313|EMBL:EMS59083.1, ECO:0000313|EnsemblPlants:TRIUR3_33970-P1};
TRINITY_DN22298_c0_g1_i2	tr|A0A1D5WJD8|A0A1D5WJD8_WHEAT	99	6.8e-37	162.9	45.1	A0A1D5WJD8_WHEAT	Uncharacterized protein	SubName: Full=Uncharacterized protein {ECO:0000313|EnsemblPlants:TRIAE_CS42_3DL_TGACv1_250657_AA0871700.1};
TRINITY_DN22222_c0_g1_i3	tr|A2TLI0|A2TLI0_HORVV	65	5e-12	79	72.3	A2TLI0_HORVV	Histidine kinase	SubName: Full=Histidine kinase {ECO:0000313|EMBL:ABM92929.1}; Flags: Fragment;
TRINITY_DN22222_c0_g1_i1	tr|A2TLI0|A2TLI0_HORVV	54	1.2e-06	61.6	40	A2TLI0_HORVV	Histidine kinase	SubName: Full=Histidine kinase {ECO:0000313|EMBL:ABM92929.1}; Flags: Fragment;
TRINITY_DN22222_c0_g1_i2	tr|A0A1D5TWS9|A0A1D5TWS9_WHEAT	69	1.2e-11	79.7	19.6	A0A1D5TWS9_WHEAT	Uncharacterized protein	SubName: Full=Uncharacterized protein {ECO:0000313|EnsemblPlants:TRIAE_CS42_2BL_TGACv1_129810_AA0396920.1};
TRINITY_DN22222_c1_g1_i3	tr|A0A290Y2L5|A0A290Y2L5_ZOSMR	96	4.3e-28	133.3	58.8	A0A290Y2L5_ZOSMR	50S ribosomal protein L23, chloroplastic	RecName: Full=50S ribosomal protein L23, chloroplastic {ECO:0000256|HAMAP-Rule:MF_01369};
TRINITY_DN22222_c1_g1_i1	sp|A1EA51|RK23B_AGRST	93	1.3e-46	194.9	52.6	RK23B_AGRST	50S ribosomal protein L23-B, chloroplastic	RecName: Full=50S ribosomal protein L23-B, chloroplastic;
TRINITY_DN22222_c1_g1_i9	tr|A0A290Y2L5|A0A290Y2L5_ZOSMR	96	7.7e-28	132.5	55.7	A0A290Y2L5_ZOSMR	50S ribosomal protein L23, chloroplastic	RecName: Full=50S ribosomal protein L23, chloroplastic {ECO:0000256|HAMAP-Rule:MF_01369};
TRINITY_DN22222_c1_g1_i6	tr|A0A290Y2L5|A0A290Y2L5_ZOSMR	96	1.3e-27	131.7	58.8	A0A290Y2L5_ZOSMR	50S ribosomal protein L23, chloroplastic	RecName: Full=50S ribosomal protein L23, chloroplastic {ECO:0000256|HAMAP-Rule:MF_01369};
TRINITY_DN22222_c1_g1_i2	tr|A0A290Y2L5|A0A290Y2L5_ZOSMR	96	4e-28	133.3	62.6	A0A290Y2L5_ZOSMR	50S ribosomal protein L23, chloroplastic	RecName: Full=50S ribosomal protein L23, chloroplastic {ECO:0000256|HAMAP-Rule:MF_01369};
TRINITY_DN22222_c1_g1_i7	sp|A1EA51|RK23B_AGRST	93	1.2e-46	194.9	55.8	RK23B_AGRST	50S ribosomal protein L23-B, chloroplastic	RecName: Full=50S ribosomal protein L23-B, chloroplastic;
TRINITY_DN22222_c1_g2_i1	tr|A0A287G3T0|A0A287G3T0_HORVV	67	1.7e-22	113.6	83.4	A0A287G3T0_HORVV	Uncharacterized protein	SubName: Full=Uncharacterized protein {ECO:0000313|EnsemblPlants:HORVU1Hr1G069840.1};
TRINITY_DN22223_c0_g1_i11	tr|A0A1D5XIJ5|A0A1D5XIJ5_WHEAT	289	5.5e-170	605.9	73.4	A0A1D5XIJ5_WHEAT	Uncharacterized protein	SubName: Full=Uncharacterized protein {ECO:0000313|EnsemblPlants:TRIAE_CS42_4BL_TGACv1_320815_AA1049350.2};
TRINITY_DN22223_c0_g1_i6	tr|A0A1D5XIJ5|A0A1D5XIJ5_WHEAT	289	1.2e-167	598.2	70.8	A0A1D5XIJ5_WHEAT	Uncharacterized protein	SubName: Full=Uncharacterized protein {ECO:0000313|EnsemblPlants:TRIAE_CS42_4BL_TGACv1_320815_AA1049350.2};
TRINITY_DN22223_c0_g1_i13	tr|A0A1D5XIJ5|A0A1D5XIJ5_WHEAT	248	4.7e-143	515.8	99.9	A0A1D5XIJ5_WHEAT	Uncharacterized protein	SubName: Full=Uncharacterized protein {ECO:0000313|EnsemblPlants:TRIAE_CS42_4BL_TGACv1_320815_AA1049350.2};
TRINITY_DN22223_c0_g1_i1	tr|A0A1D5XXZ2|A0A1D5XXZ2_WHEAT	289	5.3e-170	605.9	75.7	A0A1D5XXZ2_WHEAT	Uncharacterized protein	SubName: Full=Uncharacterized protein {ECO:0000313|EnsemblPlants:TRIAE_CS42_4DL_TGACv1_342852_AA1123810.2};
TRINITY_DN22223_c0_g1_i9	tr|A0A1D5XXZ2|A0A1D5XXZ2_WHEAT	248	1.8e-142	513.8	99.9	A0A1D5XXZ2_WHEAT	Uncharacterized protein	SubName: Full=Uncharacterized protein {ECO:0000313|EnsemblPlants:TRIAE_CS42_4DL_TGACv1_342852_AA1123810.2};
TRINITY_DN22223_c0_g1_i12	tr|A0A1D5XIJ5|A0A1D5XIJ5_WHEAT	264	2.7e-152	546.6	99.5	A0A1D5XIJ5_WHEAT	Uncharacterized protein	SubName: Full=Uncharacterized protein {ECO:0000313|EnsemblPlants:TRIAE_CS42_4BL_TGACv1_320815_AA1049350.2};
TRINITY_DN22223_c0_g1_i2	tr|A0A1D5XXZ2|A0A1D5XXZ2_WHEAT	241	7.6e-138	498.4	99.6	A0A1D5XXZ2_WHEAT	Uncharacterized protein	SubName: Full=Uncharacterized protein {ECO:0000313|EnsemblPlants:TRIAE_CS42_4DL_TGACv1_342852_AA1123810.2};
TRINITY_DN22223_c0_g1_i10	tr|M7Z9S7|M7Z9S7_TRIUA	288	1.9e-152	547.7	66.8	M7Z9S7_TRIUA	12-oxophytodienoate reductase 1	SubName: Full=12-oxophytodienoate reductase 1 {ECO:0000313|EMBL:EMS56802.1, ECO:0000313|EnsemblPlants:TRIUR3_25629-P1};
TRINITY_DN22223_c0_g1_i7	tr|M8ARS5|M8ARS5_AEGTA	279	2.5e-157	563.9	66.3	M8ARS5_AEGTA	12-oxophytodienoate reductase 2	SubName: Full=12-oxophytodienoate reductase 2 {ECO:0000313|EMBL:EMT04430.1, ECO:0000313|EnsemblPlants:EMT04430};
TRINITY_DN22223_c0_g1_i4	tr|A0A287PZ51|A0A287PZ51_HORVV	262	2e-117	431.4	61.6	A0A287PZ51_HORVV	Uncharacterized protein	SubName: Full=Uncharacterized protein {ECO:0000313|EnsemblPlants:HORVU4Hr1G086050.3};
TRINITY_DN22223_c0_g1_i8	tr|A0A287PZ51|A0A287PZ51_HORVV	221	6.5e-93	349.4	79	A0A287PZ51_HORVV	Uncharacterized protein	SubName: Full=Uncharacterized protein {ECO:0000313|EnsemblPlants:HORVU4Hr1G086050.3};
TRINITY_DN22240_c0_g1_i2	tr|R7W8L0|R7W8L0_AEGTA	399	3.5e-192	679.9	86.8	R7W8L0_AEGTA	Uncharacterized protein	SubName: Full=Uncharacterized protein {ECO:0000313|EMBL:EMT13994.1, ECO:0000313|EnsemblPlants:EMT13994};
TRINITY_DN22240_c0_g1_i3	tr|R7W8L0|R7W8L0_AEGTA	399	5.3e-192	679.5	74.5	R7W8L0_AEGTA	Uncharacterized protein	SubName: Full=Uncharacterized protein {ECO:0000313|EMBL:EMT13994.1, ECO:0000313|EnsemblPlants:EMT13994};
TRINITY_DN22240_c0_g1_i1	tr|R7W8L0|R7W8L0_AEGTA	399	5.1e-192	679.5	77.6	R7W8L0_AEGTA	Uncharacterized protein	SubName: Full=Uncharacterized protein {ECO:0000313|EMBL:EMT13994.1, ECO:0000313|EnsemblPlants:EMT13994};
TRINITY_DN22240_c0_g2_i1	tr|A0A1D5YTG6|A0A1D5YTG6_WHEAT	277	4.5e-156	560.1	53.8	A0A1D5YTG6_WHEAT	Uncharacterized protein	SubName: Full=Uncharacterized protein {ECO:0000313|EnsemblPlants:TRIAE_CS42_5AS_TGACv1_393076_AA1268010.2};
TRINITY_DN22240_c0_g2_i5	tr|A0A1D5YTG6|A0A1D5YTG6_WHEAT	269	9.4e-152	545.8	49.1	A0A1D5YTG6_WHEAT	Uncharacterized protein	SubName: Full=Uncharacterized protein {ECO:0000313|EnsemblPlants:TRIAE_CS42_5AS_TGACv1_393076_AA1268010.2};
TRINITY_DN22240_c0_g2_i2	tr|A0A1D5YTG6|A0A1D5YTG6_WHEAT	269	1.1e-151	545.8	42	A0A1D5YTG6_WHEAT	Uncharacterized protein	SubName: Full=Uncharacterized protein {ECO:0000313|EnsemblPlants:TRIAE_CS42_5AS_TGACv1_393076_AA1268010.2};
TRINITY_DN22240_c0_g2_i3	tr|A0A1D5YTG6|A0A1D5YTG6_WHEAT	277	5.3e-156	560.1	45.6	A0A1D5YTG6_WHEAT	Uncharacterized protein	SubName: Full=Uncharacterized protein {ECO:0000313|EnsemblPlants:TRIAE_CS42_5AS_TGACv1_393076_AA1268010.2};
TRINITY_DN22240_c1_g1_i2	tr|A0A287L0R0|A0A287L0R0_HORVV	160	4.4e-67	263.5	61	A0A287L0R0_HORVV	Uncharacterized protein	SubName: Full=Uncharacterized protein {ECO:0000313|EnsemblPlants:HORVU3Hr1G050650.3};
TRINITY_DN22240_c1_g1_i1	tr|A0A287L0R0|A0A287L0R0_HORVV	136	3.4e-42	180.6	55.6	A0A287L0R0_HORVV	Uncharacterized protein	SubName: Full=Uncharacterized protein {ECO:0000313|EnsemblPlants:HORVU3Hr1G050650.3};
TRINITY_DN22240_c1_g2_i1	tr|A0A1D6BF54|A0A1D6BF54_WHEAT	149	1.1e-78	301.2	99.8	A0A1D6BF54_WHEAT	Uncharacterized protein	SubName: Full=Uncharacterized protein {ECO:0000313|EnsemblPlants:TRIAE_CS42_6DS_TGACv1_543477_AA1740600.1};
TRINITY_DN22240_c1_g3_i1	tr|A0A1D5S3L4|A0A1D5S3L4_WHEAT	66	6.7e-30	138.3	80.5	A0A1D5S3L4_WHEAT	Uncharacterized protein	SubName: Full=Uncharacterized protein {ECO:0000313|EnsemblPlants:TRIAE_CS42_1AS_TGACv1_019934_AA0073060.2};
TRINITY_DN22282_c0_g1_i1	tr|A0A1D5YT74|A0A1D5YT74_WHEAT	149	1.3e-73	285	62.2	A0A1D5YT74_WHEAT	Uncharacterized protein	SubName: Full=Uncharacterized protein {ECO:0000313|EnsemblPlants:TRIAE_CS42_5AS_TGACv1_392961_AA1266850.2};
TRINITY_DN22282_c0_g1_i2	tr|A0A1D5YT74|A0A1D5YT74_WHEAT	148	4.4e-73	283.1	69.2	A0A1D5YT74_WHEAT	Uncharacterized protein	SubName: Full=Uncharacterized protein {ECO:0000313|EnsemblPlants:TRIAE_CS42_5AS_TGACv1_392961_AA1266850.2};
TRINITY_DN22282_c1_g1_i6	tr|M8D6A2|M8D6A2_AEGTA	49	2.2e-07	66.6	6.9	M8D6A2_AEGTA	Putative disease resistance protein	SubName: Full=Putative disease resistance protein {ECO:0000313|EMBL:EMT31936.1, ECO:0000313|EnsemblPlants:EMT31936};
TRINITY_DN22282_c1_g1_i5	tr|M8D6A2|M8D6A2_AEGTA	49	2.5e-07	66.6	5.9	M8D6A2_AEGTA	Putative disease resistance protein	SubName: Full=Putative disease resistance protein {ECO:0000313|EMBL:EMT31936.1, ECO:0000313|EnsemblPlants:EMT31936};
TRINITY_DN22282_c1_g1_i3	tr|M8D6A2|M8D6A2_AEGTA	49	2.3e-07	66.6	6.6	M8D6A2_AEGTA	Putative disease resistance protein	SubName: Full=Putative disease resistance protein {ECO:0000313|EMBL:EMT31936.1, ECO:0000313|EnsemblPlants:EMT31936};
TRINITY_DN22282_c1_g1_i4	tr|I1H776|I1H776_BRADI	48	3.1e-05	59.3	7.6	I1H776_BRADI	Uncharacterized protein	SubName: Full=Uncharacterized protein {ECO:0000313|EMBL:KQK22463.1, ECO:0000313|EnsemblPlants:BRADI1G67360.1};
TRINITY_DN22282_c1_g1_i2	tr|M8D6A2|M8D6A2_AEGTA	49	1.4e-07	66.6	10.6	M8D6A2_AEGTA	Putative disease resistance protein	SubName: Full=Putative disease resistance protein {ECO:0000313|EMBL:EMT31936.1, ECO:0000313|EnsemblPlants:EMT31936};
TRINITY_DN22282_c1_g1_i1	tr|M8D6A2|M8D6A2_AEGTA	49	1.3e-07	66.6	11	M8D6A2_AEGTA	Putative disease resistance protein	SubName: Full=Putative disease resistance protein {ECO:0000313|EMBL:EMT31936.1, ECO:0000313|EnsemblPlants:EMT31936};
TRINITY_DN22203_c0_g1_i4	tr|M7ZIB8|M7ZIB8_TRIUA	55	1.1e-10	77	11.6	M7ZIB8_TRIUA	Uncharacterized protein	SubName: Full=Uncharacterized protein {ECO:0000313|EMBL:EMS52095.1, ECO:0000313|EnsemblPlants:TRIUR3_29319-P1};
TRINITY_DN22203_c0_g1_i6	tr|M7ZIB8|M7ZIB8_TRIUA	55	6.3e-11	77	19.5	M7ZIB8_TRIUA	Uncharacterized protein	SubName: Full=Uncharacterized protein {ECO:0000313|EMBL:EMS52095.1, ECO:0000313|EnsemblPlants:TRIUR3_29319-P1};
TRINITY_DN22203_c0_g2_i3	tr|M7ZP41|M7ZP41_TRIUA	68	4.3e-26	125.9	65.6	M7ZP41_TRIUA	DNA-binding protein EMBP-1	SubName: Full=DNA-binding protein EMBP-1 {ECO:0000313|EMBL:EMS61406.1, ECO:0000313|EnsemblPlants:TRIUR3_21644-P1};
TRINITY_DN22203_c0_g2_i1	tr|M7ZBH4|M7ZBH4_TRIUA	89	9.4e-38	164.9	76.9	M7ZBH4_TRIUA	Uncharacterized protein	SubName: Full=Uncharacterized protein {ECO:0000313|EMBL:EMS60528.1, ECO:0000313|EnsemblPlants:TRIUR3_29466-P1};
TRINITY_DN22203_c0_g2_i2	tr|M7ZP41|M7ZP41_TRIUA	91	2.1e-38	166.8	92.2	M7ZP41_TRIUA	DNA-binding protein EMBP-1	SubName: Full=DNA-binding protein EMBP-1 {ECO:0000313|EMBL:EMS61406.1, ECO:0000313|EnsemblPlants:TRIUR3_21644-P1};
TRINITY_DN22203_c0_g2_i4	tr|M7ZBH4|M7ZBH4_TRIUA	89	8.6e-23	115.2	60.3	M7ZBH4_TRIUA	Uncharacterized protein	SubName: Full=Uncharacterized protein {ECO:0000313|EMBL:EMS60528.1, ECO:0000313|EnsemblPlants:TRIUR3_29466-P1};
TRINITY_DN22203_c0_g2_i5	tr|M7ZBH4|M7ZBH4_TRIUA	89	5.2e-23	115.5	76.4	M7ZBH4_TRIUA	Uncharacterized protein	SubName: Full=Uncharacterized protein {ECO:0000313|EMBL:EMS60528.1, ECO:0000313|EnsemblPlants:TRIUR3_29466-P1};
TRINITY_DN22203_c0_g4_i1	tr|M7ZEA4|M7ZEA4_TRIUA	44	1.3e-14	87.8	42	M7ZEA4_TRIUA	Uncharacterized protein	SubName: Full=Uncharacterized protein {ECO:0000313|EMBL:EMS46429.1, ECO:0000313|EnsemblPlants:TRIUR3_01277-P1};
TRINITY_DN22203_c1_g1_i1	tr|B8Q959|B8Q959_TRIMO	44	4.3e-12	79.3	46.6	B8Q959_TRIMO	Ulp1	SubName: Full=Ulp1 {ECO:0000313|EMBL:ACB29729.1}; Flags: Fragment;
TRINITY_DN22203_c1_g1_i2	tr|M7ZEA4|M7ZEA4_TRIUA	57	4.7e-20	105.9	54.5	M7ZEA4_TRIUA	Uncharacterized protein	SubName: Full=Uncharacterized protein {ECO:0000313|EMBL:EMS46429.1, ECO:0000313|EnsemblPlants:TRIUR3_01277-P1};
TRINITY_DN22203_c1_g2_i2	tr|A0A1D5TID6|A0A1D5TID6_WHEAT	55	1.3e-11	79.3	19.7	A0A1D5TID6_WHEAT	Uncharacterized protein	SubName: Full=Uncharacterized protein {ECO:0000313|EnsemblPlants:TRIAE_CS42_2AS_TGACv1_112085_AA0329840.1};
TRINITY_DN22203_c1_g2_i1	tr|A0A1D5TID6|A0A1D5TID6_WHEAT	128	9.4e-13	83.2	42.4	A0A1D5TID6_WHEAT	Uncharacterized protein	SubName: Full=Uncharacterized protein {ECO:0000313|EnsemblPlants:TRIAE_CS42_2AS_TGACv1_112085_AA0329840.1};
TRINITY_DN22203_c2_g1_i2	tr|A0A1D6DJB2|A0A1D6DJB2_WHEAT	33	6.8e-07	63.9	9.6	A0A1D6DJB2_WHEAT	Uncharacterized protein	SubName: Full=Uncharacterized protein {ECO:0000313|EnsemblPlants:TRIAE_CS42_U_TGACv1_643703_AA2134420.1};
TRINITY_DN22234_c0_g1_i1	tr|W5GD95|W5GD95_WHEAT	63	2.5e-20	107.5	38.3	W5GD95_WHEAT	Uncharacterized protein	SubName: Full=Uncharacterized protein {ECO:0000313|EnsemblPlants:TRIAE_CS42_6AS_TGACv1_486476_AA1561600.1};
TRINITY_DN22234_c0_g1_i2	tr|A0A1D6BBT1|A0A1D6BBT1_WHEAT	88	3.2e-31	143.7	53.5	A0A1D6BBT1_WHEAT	Uncharacterized protein	SubName: Full=Uncharacterized protein {ECO:0000313|EnsemblPlants:TRIAE_CS42_6DS_TGACv1_542506_AA1722980.1};
TRINITY_DN22243_c0_g1_i3	tr|M7ZND7|M7ZND7_TRIUA	79	1.5e-25	124.8	44.2	M7ZND7_TRIUA	Uncharacterized protein	SubName: Full=Uncharacterized protein {ECO:0000313|EMBL:EMS61156.1, ECO:0000313|EnsemblPlants:TRIUR3_10521-P1};
TRINITY_DN22243_c0_g1_i2	tr|A0A1D5U7W8|A0A1D5U7W8_WHEAT	63	3.3e-16	94	34.2	A0A1D5U7W8_WHEAT	Uncharacterized protein	SubName: Full=Uncharacterized protein {ECO:0000313|EnsemblPlants:TRIAE_CS42_2BS_TGACv1_146113_AA0455480.1};
TRINITY_DN22243_c0_g1_i1	tr|A0A1D5U7W8|A0A1D5U7W8_WHEAT	55	2.2e-12	81.3	29.6	A0A1D5U7W8_WHEAT	Uncharacterized protein	SubName: Full=Uncharacterized protein {ECO:0000313|EnsemblPlants:TRIAE_CS42_2BS_TGACv1_146113_AA0455480.1};
TRINITY_DN22236_c0_g1_i1	tr|M8ANV9|M8ANV9_TRIUA	92	2e-43	183.3	100	M8ANV9_TRIUA	ABC transporter C family member 2	SubName: Full=ABC transporter C family member 2 {ECO:0000313|EMBL:EMS62619.1, ECO:0000313|EnsemblPlants:TRIUR3_05458-P1};
TRINITY_DN22296_c0_g1_i9	tr|W5AYF9|W5AYF9_WHEAT	187	9.9e-101	375.6	57.7	W5AYF9_WHEAT	Uncharacterized protein	SubName: Full=Uncharacterized protein {ECO:0000313|EnsemblPlants:TRIAE_CS42_2AL_TGACv1_093527_AA0281840.1};
TRINITY_DN22296_c0_g1_i6	tr|A0A1D5T8C6|A0A1D5T8C6_WHEAT	173	2.3e-82	314.3	61.4	A0A1D5T8C6_WHEAT	Uncharacterized protein	SubName: Full=Uncharacterized protein {ECO:0000313|EnsemblPlants:TRIAE_CS42_2AL_TGACv1_093527_AA0281830.1};
TRINITY_DN22296_c0_g1_i2	tr|A0A1D5TU74|A0A1D5TU74_WHEAT	174	6.1e-87	329.7	55.2	A0A1D5TU74_WHEAT	Uncharacterized protein	SubName: Full=Uncharacterized protein {ECO:0000313|EnsemblPlants:TRIAE_CS42_2BL_TGACv1_129453_AA0384510.2};
TRINITY_DN22296_c0_g1_i13	tr|A0A287JTB2|A0A287JTB2_HORVV	199	3.7e-98	367.1	58.4	A0A287JTB2_HORVV	Uncharacterized protein	SubName: Full=Uncharacterized protein {ECO:0000313|EnsemblPlants:HORVU2Hr1G126040.10};
TRINITY_DN22296_c0_g1_i8	tr|M8D7K0|M8D7K0_AEGTA	199	1.2e-93	352.1	57.2	M8D7K0_AEGTA	Uncharacterized protein	SubName: Full=Uncharacterized protein {ECO:0000313|EMBL:EMT32451.1, ECO:0000313|EnsemblPlants:EMT32451};
TRINITY_DN22296_c0_g1_i12	tr|M7ZVJ0|M7ZVJ0_TRIUA	176	3.2e-92	347.1	63.3	M7ZVJ0_TRIUA	NAC domain-containing protein 7	SubName: Full=NAC domain-containing protein 7 {ECO:0000313|EMBL:EMS63656.1, ECO:0000313|EnsemblPlants:TRIUR3_10971-P1};
TRINITY_DN22296_c0_g1_i3	tr|M7ZVJ0|M7ZVJ0_TRIUA	163	3.4e-86	327	60.2	M7ZVJ0_TRIUA	NAC domain-containing protein 7	SubName: Full=NAC domain-containing protein 7 {ECO:0000313|EMBL:EMS63656.1, ECO:0000313|EnsemblPlants:TRIUR3_10971-P1};
TRINITY_DN22296_c0_g1_i1	tr|M7ZVJ0|M7ZVJ0_TRIUA	163	1.6e-88	334.7	61.6	M7ZVJ0_TRIUA	NAC domain-containing protein 7	SubName: Full=NAC domain-containing protein 7 {ECO:0000313|EMBL:EMS63656.1, ECO:0000313|EnsemblPlants:TRIUR3_10971-P1};
TRINITY_DN22296_c0_g1_i11	tr|W5AX06|W5AX06_WHEAT	187	8.8e-101	375.6	64.9	W5AX06_WHEAT	Uncharacterized protein	SubName: Full=Uncharacterized protein {ECO:0000313|EnsemblPlants:TRIAE_CS42_2AL_TGACv1_093527_AA0281800.2};
TRINITY_DN22296_c0_g1_i10	tr|M7ZVJ0|M7ZVJ0_TRIUA	163	5.2e-87	329.7	60.2	M7ZVJ0_TRIUA	NAC domain-containing protein 7	SubName: Full=NAC domain-containing protein 7 {ECO:0000313|EMBL:EMS63656.1, ECO:0000313|EnsemblPlants:TRIUR3_10971-P1};
TRINITY_DN22296_c0_g1_i5	tr|M7ZVJ0|M7ZVJ0_TRIUA	163	4.3e-81	310.1	60.2	M7ZVJ0_TRIUA	NAC domain-containing protein 7	SubName: Full=NAC domain-containing protein 7 {ECO:0000313|EMBL:EMS63656.1, ECO:0000313|EnsemblPlants:TRIUR3_10971-P1};
TRINITY_DN22237_c0_g1_i1	tr|W5AFT5|W5AFT5_WHEAT	78	2.2e-32	147.1	61.6	W5AFT5_WHEAT	Uncharacterized protein	SubName: Full=Uncharacterized protein {ECO:0000313|EnsemblPlants:TRIAE_CS42_1DL_TGACv1_062731_AA0218830.1};
TRINITY_DN22237_c0_g1_i2	tr|W5AFT5|W5AFT5_WHEAT	145	1e-73	285	75.1	W5AFT5_WHEAT	Uncharacterized protein	SubName: Full=Uncharacterized protein {ECO:0000313|EnsemblPlants:TRIAE_CS42_1DL_TGACv1_062731_AA0218830.1};
TRINITY_DN22237_c0_g2_i2	tr|A0A1D5ST49|A0A1D5ST49_WHEAT	77	8.3e-32	146.4	28	A0A1D5ST49_WHEAT	Uncharacterized protein	SubName: Full=Uncharacterized protein {ECO:0000313|EnsemblPlants:TRIAE_CS42_1DL_TGACv1_061670_AA0201340.2};
TRINITY_DN22237_c0_g2_i1	tr|A0A1D5ST49|A0A1D5ST49_WHEAT	77	6.6e-32	146.7	26.7	A0A1D5ST49_WHEAT	Uncharacterized protein	SubName: Full=Uncharacterized protein {ECO:0000313|EnsemblPlants:TRIAE_CS42_1DL_TGACv1_061670_AA0201340.2};
TRINITY_DN22237_c1_g1_i1	tr|A0A1D5SA52|A0A1D5SA52_WHEAT	77	1.1e-34	154.1	98.3	A0A1D5SA52_WHEAT	Uncharacterized protein	SubName: Full=Uncharacterized protein {ECO:0000313|EnsemblPlants:TRIAE_CS42_1BL_TGACv1_031054_AA0106850.4};
TRINITY_DN22237_c1_g1_i2	tr|A0A1D5SA52|A0A1D5SA52_WHEAT	77	9.5e-34	151	98.3	A0A1D5SA52_WHEAT	Uncharacterized protein	SubName: Full=Uncharacterized protein {ECO:0000313|EnsemblPlants:TRIAE_CS42_1BL_TGACv1_031054_AA0106850.4};
TRINITY_DN22200_c0_g1_i9	tr|M7YMZ7|M7YMZ7_TRIUA	55	3.1e-17	99.8	5.7	M7YMZ7_TRIUA	Uncharacterized protein	SubName: Full=Uncharacterized protein {ECO:0000313|EMBL:EMS48306.1, ECO:0000313|EnsemblPlants:TRIUR3_08749-P1};
TRINITY_DN22200_c0_g1_i13	tr|M7YMZ7|M7YMZ7_TRIUA	77	4e-17	97.1	39.8	M7YMZ7_TRIUA	Uncharacterized protein	SubName: Full=Uncharacterized protein {ECO:0000313|EMBL:EMS48306.1, ECO:0000313|EnsemblPlants:TRIUR3_08749-P1};
TRINITY_DN22200_c0_g1_i7	tr|M7YMZ7|M7YMZ7_TRIUA	78	6e-10	73.2	37.8	M7YMZ7_TRIUA	Uncharacterized protein	SubName: Full=Uncharacterized protein {ECO:0000313|EMBL:EMS48306.1, ECO:0000313|EnsemblPlants:TRIUR3_08749-P1};
TRINITY_DN22200_c0_g1_i6	tr|A0A0Q3MD74|A0A0Q3MD74_BRADI	68	2.2e-18	100.9	44.9	A0A0Q3MD74_BRADI	Uncharacterized protein	SubName: Full=Uncharacterized protein {ECO:0000313|EMBL:KQK02270.1};
TRINITY_DN22200_c0_g1_i4	tr|M7YMZ7|M7YMZ7_TRIUA	97	2.1e-27	133.7	9.4	M7YMZ7_TRIUA	Uncharacterized protein	SubName: Full=Uncharacterized protein {ECO:0000313|EMBL:EMS48306.1, ECO:0000313|EnsemblPlants:TRIUR3_08749-P1};
TRINITY_DN22200_c0_g1_i12	tr|A0A0Q3MD74|A0A0Q3MD74_BRADI	82	9.5e-16	92.8	33.6	A0A0Q3MD74_BRADI	Uncharacterized protein	SubName: Full=Uncharacterized protein {ECO:0000313|EMBL:KQK02270.1};
TRINITY_DN22200_c0_g1_i3	tr|A0A0Q3MD74|A0A0Q3MD74_BRADI	68	3.1e-08	68.2	20.4	A0A0Q3MD74_BRADI	Uncharacterized protein	SubName: Full=Uncharacterized protein {ECO:0000313|EMBL:KQK02270.1};
TRINITY_DN22200_c0_g1_i14	tr|A0A0Q3MD74|A0A0Q3MD74_BRADI	68	3.7e-08	68.2	17.1	A0A0Q3MD74_BRADI	Uncharacterized protein	SubName: Full=Uncharacterized protein {ECO:0000313|EMBL:KQK02270.1};
TRINITY_DN22200_c0_g1_i1	tr|M7YMZ7|M7YMZ7_TRIUA	97	3e-26	129.8	9.4	M7YMZ7_TRIUA	Uncharacterized protein	SubName: Full=Uncharacterized protein {ECO:0000313|EMBL:EMS48306.1, ECO:0000313|EnsemblPlants:TRIUR3_08749-P1};
TRINITY_DN22249_c0_g1_i5	tr|A0A1D6CJ99|A0A1D6CJ99_WHEAT	58	4.5e-20	108.6	9	A0A1D6CJ99_WHEAT	Uncharacterized protein	SubName: Full=Uncharacterized protein {ECO:0000313|EnsemblPlants:TRIAE_CS42_7BS_TGACv1_593531_AA1952270.1};
TRINITY_DN22249_c0_g1_i12	tr|A0A1D6CJ99|A0A1D6CJ99_WHEAT	55	2.8e-14	89.7	6.7	A0A1D6CJ99_WHEAT	Uncharacterized protein	SubName: Full=Uncharacterized protein {ECO:0000313|EnsemblPlants:TRIAE_CS42_7BS_TGACv1_593531_AA1952270.1};
TRINITY_DN22249_c0_g1_i13	tr|A0A1D6CJ99|A0A1D6CJ99_WHEAT	55	2.7e-14	89.7	6.7	A0A1D6CJ99_WHEAT	Uncharacterized protein	SubName: Full=Uncharacterized protein {ECO:0000313|EnsemblPlants:TRIAE_CS42_7BS_TGACv1_593531_AA1952270.1};
TRINITY_DN22249_c0_g1_i16	tr|A0A1D6CJ99|A0A1D6CJ99_WHEAT	58	1.5e-22	116.7	10.1	A0A1D6CJ99_WHEAT	Uncharacterized protein	SubName: Full=Uncharacterized protein {ECO:0000313|EnsemblPlants:TRIAE_CS42_7BS_TGACv1_593531_AA1952270.1};
TRINITY_DN22249_c0_g1_i15	tr|A0A1D6CJ99|A0A1D6CJ99_WHEAT	58	6.3e-20	108.6	6.4	A0A1D6CJ99_WHEAT	Uncharacterized protein	SubName: Full=Uncharacterized protein {ECO:0000313|EnsemblPlants:TRIAE_CS42_7BS_TGACv1_593531_AA1952270.1};
TRINITY_DN22249_c0_g1_i9	tr|A0A1D6CJ99|A0A1D6CJ99_WHEAT	58	5.1e-20	108.6	7.9	A0A1D6CJ99_WHEAT	Uncharacterized protein	SubName: Full=Uncharacterized protein {ECO:0000313|EnsemblPlants:TRIAE_CS42_7BS_TGACv1_593531_AA1952270.1};
TRINITY_DN22249_c0_g1_i4	tr|A0A1D6CJ99|A0A1D6CJ99_WHEAT	58	1.9e-22	116.7	7.9	A0A1D6CJ99_WHEAT	Uncharacterized protein	SubName: Full=Uncharacterized protein {ECO:0000313|EnsemblPlants:TRIAE_CS42_7BS_TGACv1_593531_AA1952270.1};
TRINITY_DN22249_c0_g1_i19	tr|A0A1D6CJ99|A0A1D6CJ99_WHEAT	58	9.7e-06	60.5	10.6	A0A1D6CJ99_WHEAT	Uncharacterized protein	SubName: Full=Uncharacterized protein {ECO:0000313|EnsemblPlants:TRIAE_CS42_7BS_TGACv1_593531_AA1952270.1};
TRINITY_DN22249_c0_g1_i18	tr|A0A1D6CJ99|A0A1D6CJ99_WHEAT	58	3.4e-20	108.6	11.9	A0A1D6CJ99_WHEAT	Uncharacterized protein	SubName: Full=Uncharacterized protein {ECO:0000313|EnsemblPlants:TRIAE_CS42_7BS_TGACv1_593531_AA1952270.1};
TRINITY_DN22249_c0_g1_i17	tr|A0A1D6CJ99|A0A1D6CJ99_WHEAT	58	5.3e-20	108.6	7.7	A0A1D6CJ99_WHEAT	Uncharacterized protein	SubName: Full=Uncharacterized protein {ECO:0000313|EnsemblPlants:TRIAE_CS42_7BS_TGACv1_593531_AA1952270.1};
TRINITY_DN22249_c0_g1_i1	tr|A0A1D6CJ99|A0A1D6CJ99_WHEAT	58	6e-06	60.5	17.2	A0A1D6CJ99_WHEAT	Uncharacterized protein	SubName: Full=Uncharacterized protein {ECO:0000313|EnsemblPlants:TRIAE_CS42_7BS_TGACv1_593531_AA1952270.1};
TRINITY_DN22249_c0_g1_i11	tr|A0A1D6CJ99|A0A1D6CJ99_WHEAT	58	4.5e-20	108.6	9	A0A1D6CJ99_WHEAT	Uncharacterized protein	SubName: Full=Uncharacterized protein {ECO:0000313|EnsemblPlants:TRIAE_CS42_7BS_TGACv1_593531_AA1952270.1};
TRINITY_DN22201_c0_g2_i2	tr|A0A287EYU3|A0A287EYU3_HORVV	60	2.1e-05	58.5	19.7	A0A287EYU3_HORVV	Uncharacterized protein	SubName: Full=Uncharacterized protein {ECO:0000313|EnsemblPlants:HORVU1Hr1G025500.4};
TRINITY_DN22201_c0_g2_i1	tr|A0A287EYV1|A0A287EYV1_HORVV	56	3.4e-12	81.3	19.5	A0A287EYV1_HORVV	Uncharacterized protein	SubName: Full=Uncharacterized protein {ECO:0000313|EnsemblPlants:HORVU1Hr1G025500.3};
TRINITY_DN22201_c0_g2_i3	tr|A0A287EYU3|A0A287EYU3_HORVV	108	1.7e-07	65.9	25.5	A0A287EYU3_HORVV	Uncharacterized protein	SubName: Full=Uncharacterized protein {ECO:0000313|EnsemblPlants:HORVU1Hr1G025500.4};
TRINITY_DN22201_c0_g2_i4	tr|A0A287EYV1|A0A287EYV1_HORVV	122	9.7e-16	93.2	38.2	A0A287EYV1_HORVV	Uncharacterized protein	SubName: Full=Uncharacterized protein {ECO:0000313|EnsemblPlants:HORVU1Hr1G025500.3};
TRINITY_DN22201_c0_g2_i5	tr|T1MEQ3|T1MEQ3_TRIUA	113	8.7e-05	57	31.2	T1MEQ3_TRIUA	Uncharacterized protein	SubName: Full=Uncharacterized protein {ECO:0000313|EnsemblPlants:TRIUR3_16165-P1};
TRINITY_DN22283_c0_g2_i3	tr|A0A1D6DLY8|A0A1D6DLY8_WHEAT	54	1.2e-16	96.7	12.4	A0A1D6DLY8_WHEAT	Uncharacterized protein	SubName: Full=Uncharacterized protein {ECO:0000313|EnsemblPlants:TRIAE_CS42_U_TGACv1_666266_AA2154220.1};
TRINITY_DN22283_c0_g2_i2	tr|A0A1D6DLY8|A0A1D6DLY8_WHEAT	54	7.3e-17	96.7	20.4	A0A1D6DLY8_WHEAT	Uncharacterized protein	SubName: Full=Uncharacterized protein {ECO:0000313|EnsemblPlants:TRIAE_CS42_U_TGACv1_666266_AA2154220.1};
TRINITY_DN22283_c0_g2_i4	tr|A0A1D6DLY8|A0A1D6DLY8_WHEAT	55	1.6e-16	94.7	34.7	A0A1D6DLY8_WHEAT	Uncharacterized protein	SubName: Full=Uncharacterized protein {ECO:0000313|EnsemblPlants:TRIAE_CS42_U_TGACv1_666266_AA2154220.1};
TRINITY_DN22283_c0_g2_i1	tr|A0A1D6DLY8|A0A1D6DLY8_WHEAT	54	1.3e-16	96.7	11.1	A0A1D6DLY8_WHEAT	Uncharacterized protein	SubName: Full=Uncharacterized protein {ECO:0000313|EnsemblPlants:TRIAE_CS42_U_TGACv1_666266_AA2154220.1};
TRINITY_DN22283_c0_g3_i4	tr|A0A1D6DLY8|A0A1D6DLY8_WHEAT	44	1e-09	73.6	10.6	A0A1D6DLY8_WHEAT	Uncharacterized protein	SubName: Full=Uncharacterized protein {ECO:0000313|EnsemblPlants:TRIAE_CS42_U_TGACv1_666266_AA2154220.1};
TRINITY_DN22283_c0_g3_i6	tr|A0A1D6DLY8|A0A1D6DLY8_WHEAT	44	1.1e-09	73.6	9.9	A0A1D6DLY8_WHEAT	Uncharacterized protein	SubName: Full=Uncharacterized protein {ECO:0000313|EnsemblPlants:TRIAE_CS42_U_TGACv1_666266_AA2154220.1};
TRINITY_DN22283_c0_g3_i2	tr|A0A1D6DLY8|A0A1D6DLY8_WHEAT	44	1e-09	73.6	10.8	A0A1D6DLY8_WHEAT	Uncharacterized protein	SubName: Full=Uncharacterized protein {ECO:0000313|EnsemblPlants:TRIAE_CS42_U_TGACv1_666266_AA2154220.1};
TRINITY_DN22283_c0_g3_i7	tr|A0A1D6DLY8|A0A1D6DLY8_WHEAT	44	1.2e-09	73.6	9.3	A0A1D6DLY8_WHEAT	Uncharacterized protein	SubName: Full=Uncharacterized protein {ECO:0000313|EnsemblPlants:TRIAE_CS42_U_TGACv1_666266_AA2154220.1};
TRINITY_DN22283_c0_g3_i5	tr|A0A1D6DLY8|A0A1D6DLY8_WHEAT	44	9.3e-10	73.6	11.7	A0A1D6DLY8_WHEAT	Uncharacterized protein	SubName: Full=Uncharacterized protein {ECO:0000313|EnsemblPlants:TRIAE_CS42_U_TGACv1_666266_AA2154220.1};
TRINITY_DN22283_c0_g3_i3	tr|A0A1D6DLY8|A0A1D6DLY8_WHEAT	44	1.1e-09	73.6	9.9	A0A1D6DLY8_WHEAT	Uncharacterized protein	SubName: Full=Uncharacterized protein {ECO:0000313|EnsemblPlants:TRIAE_CS42_U_TGACv1_666266_AA2154220.1};
TRINITY_DN22283_c0_g3_i1	tr|A0A1D6DLY8|A0A1D6DLY8_WHEAT	44	4.1e-10	73.6	26.8	A0A1D6DLY8_WHEAT	Uncharacterized protein	SubName: Full=Uncharacterized protein {ECO:0000313|EnsemblPlants:TRIAE_CS42_U_TGACv1_666266_AA2154220.1};
TRINITY_DN22283_c1_g1_i1	tr|A0A1D5RUY8|A0A1D5RUY8_WHEAT	70	7.5e-30	138.3	76.4	A0A1D5RUY8_WHEAT	Uncharacterized protein	SubName: Full=Uncharacterized protein {ECO:0000313|EnsemblPlants:TRIAE_CS42_1AL_TGACv1_001439_AA0030600.1};
TRINITY_DN22283_c1_g1_i2	tr|A0A1D6RJG0|A0A1D6RJG0_WHEAT	65	9.6e-29	134.4	80.2	A0A1D6RJG0_WHEAT	Uncharacterized protein	SubName: Full=Uncharacterized protein {ECO:0000313|EnsemblPlants:TRIAE_CS42_2AL_TGACv1_095050_AA0306400.1};
TRINITY_DN22283_c1_g1_i4	tr|A0A1D5RUY8|A0A1D5RUY8_WHEAT	73	1e-31	145.6	36.2	A0A1D5RUY8_WHEAT	Uncharacterized protein	SubName: Full=Uncharacterized protein {ECO:0000313|EnsemblPlants:TRIAE_CS42_1AL_TGACv1_001439_AA0030600.1};
TRINITY_DN22272_c0_g1_i6	tr|A0A1D5SUZ2|A0A1D5SUZ2_WHEAT	133	7.1e-61	243.8	25.9	A0A1D5SUZ2_WHEAT	Uncharacterized protein	SubName: Full=Uncharacterized protein {ECO:0000313|EnsemblPlants:TRIAE_CS42_1DL_TGACv1_062143_AA0209320.3};
TRINITY_DN22272_c0_g1_i7	tr|A0A1D5SUZ2|A0A1D5SUZ2_WHEAT	133	8.9e-61	243.8	20.8	A0A1D5SUZ2_WHEAT	Uncharacterized protein	SubName: Full=Uncharacterized protein {ECO:0000313|EnsemblPlants:TRIAE_CS42_1DL_TGACv1_062143_AA0209320.3};
TRINITY_DN22272_c0_g1_i8	tr|A0A1D5SUZ1|A0A1D5SUZ1_WHEAT	168	3.9e-80	306.6	75.3	A0A1D5SUZ1_WHEAT	Uncharacterized protein	SubName: Full=Uncharacterized protein {ECO:0000313|EnsemblPlants:TRIAE_CS42_1DL_TGACv1_062143_AA0209320.2};
TRINITY_DN22272_c0_g1_i3	tr|A0A1D5SUZ2|A0A1D5SUZ2_WHEAT	133	9.1e-61	243.8	20.3	A0A1D5SUZ2_WHEAT	Uncharacterized protein	SubName: Full=Uncharacterized protein {ECO:0000313|EnsemblPlants:TRIAE_CS42_1DL_TGACv1_062143_AA0209320.3};
TRINITY_DN22272_c0_g1_i1	tr|A0A1D5SUZ2|A0A1D5SUZ2_WHEAT	133	8.9e-61	243.8	20.8	A0A1D5SUZ2_WHEAT	Uncharacterized protein	SubName: Full=Uncharacterized protein {ECO:0000313|EnsemblPlants:TRIAE_CS42_1DL_TGACv1_062143_AA0209320.3};
TRINITY_DN22272_c0_g1_i5	tr|A0A1D5SUZ2|A0A1D5SUZ2_WHEAT	133	9.1e-61	243.8	20.3	A0A1D5SUZ2_WHEAT	Uncharacterized protein	SubName: Full=Uncharacterized protein {ECO:0000313|EnsemblPlants:TRIAE_CS42_1DL_TGACv1_062143_AA0209320.3};
TRINITY_DN22272_c0_g1_i2	tr|A0A1D5SUZ2|A0A1D5SUZ2_WHEAT	133	8.9e-61	243.8	20.8	A0A1D5SUZ2_WHEAT	Uncharacterized protein	SubName: Full=Uncharacterized protein {ECO:0000313|EnsemblPlants:TRIAE_CS42_1DL_TGACv1_062143_AA0209320.3};
TRINITY_DN22272_c0_g1_i4	tr|A0A1D5SUZ2|A0A1D5SUZ2_WHEAT	133	8.9e-61	243.8	20.8	A0A1D5SUZ2_WHEAT	Uncharacterized protein	SubName: Full=Uncharacterized protein {ECO:0000313|EnsemblPlants:TRIAE_CS42_1DL_TGACv1_062143_AA0209320.3};
TRINITY_DN22206_c0_g1_i3	tr|A0A1D5XS14|A0A1D5XS14_WHEAT	643	3.1e-231	810.1	94.7	A0A1D5XS14_WHEAT	Uncharacterized protein	SubName: Full=Uncharacterized protein {ECO:0000313|EnsemblPlants:TRIAE_CS42_4BS_TGACv1_328665_AA1091910.2};
TRINITY_DN22206_c0_g1_i1	tr|A0A1D5XS14|A0A1D5XS14_WHEAT	649	9.2e-231	808.5	94.7	A0A1D5XS14_WHEAT	Uncharacterized protein	SubName: Full=Uncharacterized protein {ECO:0000313|EnsemblPlants:TRIAE_CS42_4BS_TGACv1_328665_AA1091910.2};
TRINITY_DN22206_c0_g1_i2	tr|A0A1D5XS14|A0A1D5XS14_WHEAT	50	8.1e-18	99	34.1	A0A1D5XS14_WHEAT	Uncharacterized protein	SubName: Full=Uncharacterized protein {ECO:0000313|EnsemblPlants:TRIAE_CS42_4BS_TGACv1_328665_AA1091910.2};
TRINITY_DN22217_c0_g1_i11	tr|A0A1D5YQG5|A0A1D5YQG5_WHEAT	128	4.4e-30	141	36.9	A0A1D5YQG5_WHEAT	Uncharacterized protein	SubName: Full=Uncharacterized protein {ECO:0000313|EnsemblPlants:TRIAE_CS42_5AL_TGACv1_378009_AA1250730.1};
TRINITY_DN22217_c0_g1_i1	tr|A0A1D5YQG5|A0A1D5YQG5_WHEAT	128	1.3e-29	140.6	15.8	A0A1D5YQG5_WHEAT	Uncharacterized protein	SubName: Full=Uncharacterized protein {ECO:0000313|EnsemblPlants:TRIAE_CS42_5AL_TGACv1_378009_AA1250730.1};
TRINITY_DN22217_c0_g1_i7	tr|M7YL32|M7YL32_TRIUA	109	5e-11	77	27.1	M7YL32_TRIUA	Uncharacterized protein	SubName: Full=Uncharacterized protein {ECO:0000313|EMBL:EMS51213.1, ECO:0000313|EnsemblPlants:TRIUR3_18170-P1};
TRINITY_DN22217_c0_g1_i2	tr|M7YL32|M7YL32_TRIUA	109	7.6e-11	77	17.6	M7YL32_TRIUA	Uncharacterized protein	SubName: Full=Uncharacterized protein {ECO:0000313|EMBL:EMS51213.1, ECO:0000313|EnsemblPlants:TRIUR3_18170-P1};
TRINITY_DN22217_c0_g1_i6	tr|A0A1D5YQG5|A0A1D5YQG5_WHEAT	128	1.1e-29	140.6	20.1	A0A1D5YQG5_WHEAT	Uncharacterized protein	SubName: Full=Uncharacterized protein {ECO:0000313|EnsemblPlants:TRIAE_CS42_5AL_TGACv1_378009_AA1250730.1};
TRINITY_DN22217_c0_g1_i3	tr|M7YL32|M7YL32_TRIUA	109	5.8e-11	77	23.1	M7YL32_TRIUA	Uncharacterized protein	SubName: Full=Uncharacterized protein {ECO:0000313|EMBL:EMS51213.1, ECO:0000313|EnsemblPlants:TRIUR3_18170-P1};
TRINITY_DN22217_c0_g1_i8	tr|M7ZAV8|M7ZAV8_TRIUA	157	2e-30	142.5	34.2	M7ZAV8_TRIUA	Uncharacterized protein	SubName: Full=Uncharacterized protein {ECO:0000313|EMBL:EMS57192.1, ECO:0000313|EnsemblPlants:TRIUR3_14799-P1};
TRINITY_DN22217_c0_g1_i12	tr|M7YL32|M7YL32_TRIUA	109	3.8e-11	77	35.6	M7YL32_TRIUA	Uncharacterized protein	SubName: Full=Uncharacterized protein {ECO:0000313|EMBL:EMS51213.1, ECO:0000313|EnsemblPlants:TRIUR3_18170-P1};
TRINITY_DN22217_c0_g1_i9	tr|M7YL32|M7YL32_TRIUA	109	5e-11	77	26.9	M7YL32_TRIUA	Uncharacterized protein	SubName: Full=Uncharacterized protein {ECO:0000313|EMBL:EMS51213.1, ECO:0000313|EnsemblPlants:TRIUR3_18170-P1};
TRINITY_DN22217_c0_g1_i5	tr|M7YL32|M7YL32_TRIUA	109	7.5e-11	77	18.1	M7YL32_TRIUA	Uncharacterized protein	SubName: Full=Uncharacterized protein {ECO:0000313|EMBL:EMS51213.1, ECO:0000313|EnsemblPlants:TRIUR3_18170-P1};
TRINITY_DN22217_c0_g1_i4	tr|M7YL32|M7YL32_TRIUA	109	4e-11	77	33.2	M7YL32_TRIUA	Uncharacterized protein	SubName: Full=Uncharacterized protein {ECO:0000313|EMBL:EMS51213.1, ECO:0000313|EnsemblPlants:TRIUR3_18170-P1};
TRINITY_DN22217_c0_g1_i10	tr|M7YL32|M7YL32_TRIUA	109	3.8e-11	77	35.2	M7YL32_TRIUA	Uncharacterized protein	SubName: Full=Uncharacterized protein {ECO:0000313|EMBL:EMS51213.1, ECO:0000313|EnsemblPlants:TRIUR3_18170-P1};
TRINITY_DN22253_c0_g1_i3	tr|A0A1D5ZLQ6|A0A1D5ZLQ6_WHEAT	81	6.9e-38	165.6	56.4	A0A1D5ZLQ6_WHEAT	Uncharacterized protein	SubName: Full=Uncharacterized protein {ECO:0000313|EnsemblPlants:TRIAE_CS42_5DL_TGACv1_433312_AA1409210.1};
TRINITY_DN22253_c0_g1_i2	tr|A0A1D5ZLQ6|A0A1D5ZLQ6_WHEAT	56	6e-24	119.4	36.6	A0A1D5ZLQ6_WHEAT	Uncharacterized protein	SubName: Full=Uncharacterized protein {ECO:0000313|EnsemblPlants:TRIAE_CS42_5DL_TGACv1_433312_AA1409210.1};
TRINITY_DN22253_c0_g1_i1	tr|A0A077S3D6|A0A077S3D6_WHEAT	90	1.3e-10	74.3	99.3	A0A077S3D6_WHEAT	Uncharacterized protein	SubName: Full=Uncharacterized protein {ECO:0000313|EMBL:CDM84321.1};
TRINITY_DN22264_c0_g1_i5	tr|A0A1D6RMH8|A0A1D6RMH8_WHEAT	92	9.3e-36	157.9	98.9	A0A1D6RMH8_WHEAT	Uncharacterized protein	SubName: Full=Uncharacterized protein {ECO:0000313|EnsemblPlants:TRIAE_CS42_2BS_TGACv1_146430_AA0464900.2};
TRINITY_DN22264_c0_g1_i1	tr|A0A1D6RMH8|A0A1D6RMH8_WHEAT	107	1.5e-45	190.7	99.1	A0A1D6RMH8_WHEAT	Uncharacterized protein	SubName: Full=Uncharacterized protein {ECO:0000313|EnsemblPlants:TRIAE_CS42_2BS_TGACv1_146430_AA0464900.2};
TRINITY_DN22264_c0_g1_i7	tr|A0A1D5U8Z2|A0A1D5U8Z2_WHEAT	291	3.9e-165	589.3	99.9	A0A1D5U8Z2_WHEAT	Uncharacterized protein	SubName: Full=Uncharacterized protein {ECO:0000313|EnsemblPlants:TRIAE_CS42_2BS_TGACv1_146262_AA0460730.2};
TRINITY_DN22264_c0_g1_i4	tr|A0A1D5U8Z2|A0A1D5U8Z2_WHEAT	290	6.5e-160	572	99.8	A0A1D5U8Z2_WHEAT	Uncharacterized protein	SubName: Full=Uncharacterized protein {ECO:0000313|EnsemblPlants:TRIAE_CS42_2BS_TGACv1_146262_AA0460730.2};
TRINITY_DN22264_c0_g1_i3	tr|A0A1D5U8Z2|A0A1D5U8Z2_WHEAT	280	2.9e-157	563.1	99.8	A0A1D5U8Z2_WHEAT	Uncharacterized protein	SubName: Full=Uncharacterized protein {ECO:0000313|EnsemblPlants:TRIAE_CS42_2BS_TGACv1_146262_AA0460730.2};
TRINITY_DN22264_c0_g1_i6	tr|A0A1D5U8Z2|A0A1D5U8Z2_WHEAT	121	8.3e-61	241.5	99.5	A0A1D5U8Z2_WHEAT	Uncharacterized protein	SubName: Full=Uncharacterized protein {ECO:0000313|EnsemblPlants:TRIAE_CS42_2BS_TGACv1_146262_AA0460730.2};
TRINITY_DN22264_c0_g1_i2	tr|A0A1D5U8Z2|A0A1D5U8Z2_WHEAT	290	9.3e-159	568.2	99.8	A0A1D5U8Z2_WHEAT	Uncharacterized protein	SubName: Full=Uncharacterized protein {ECO:0000313|EnsemblPlants:TRIAE_CS42_2BS_TGACv1_146262_AA0460730.2};
TRINITY_DN22238_c0_g1_i4	tr|A0A077RTN8|A0A077RTN8_WHEAT	342	9.5e-187	661.4	99.7	A0A077RTN8_WHEAT	Uncharacterized protein	SubName: Full=Uncharacterized protein {ECO:0000313|EMBL:CDM84003.1, ECO:0000313|EnsemblPlants:TRIAE_CS42_3B_TGACv1_224311_AA0795170.1};
TRINITY_DN22238_c0_g1_i3	tr|M8CWZ4|M8CWZ4_AEGTA	86	3.2e-38	166	99.2	M8CWZ4_AEGTA	Putative glutamate carboxypeptidase 2	SubName: Full=Putative glutamate carboxypeptidase 2 {ECO:0000313|EMBL:EMT32222.1, ECO:0000313|EnsemblPlants:EMT32222};
TRINITY_DN22238_c0_g1_i1	tr|A0A077RTN8|A0A077RTN8_WHEAT	430	6.8e-241	841.6	95.6	A0A077RTN8_WHEAT	Uncharacterized protein	SubName: Full=Uncharacterized protein {ECO:0000313|EMBL:CDM84003.1, ECO:0000313|EnsemblPlants:TRIAE_CS42_3B_TGACv1_224311_AA0795170.1};
TRINITY_DN22252_c0_g1_i1	tr|A0A1D5X2X7|A0A1D5X2X7_WHEAT	53	9.2e-19	101.3	63.6	A0A1D5X2X7_WHEAT	Uncharacterized protein	SubName: Full=Uncharacterized protein {ECO:0000313|EnsemblPlants:TRIAE_CS42_4AL_TGACv1_289223_AA0967540.3};
TRINITY_DN22252_c0_g2_i2	tr|M8D2U0|M8D2U0_AEGTA	351	2.7e-93	351.3	81.1	M8D2U0_AEGTA	Uncharacterized protein	SubName: Full=Uncharacterized protein {ECO:0000313|EMBL:EMT30586.1, ECO:0000313|EnsemblPlants:EMT30586};
TRINITY_DN22252_c0_g2_i3	tr|M7ZJF4|M7ZJF4_TRIUA	272	5.4e-76	293.5	76.9	M7ZJF4_TRIUA	Uncharacterized protein	SubName: Full=Uncharacterized protein {ECO:0000313|EMBL:EMS63358.1, ECO:0000313|EnsemblPlants:TRIUR3_06562-P1};
TRINITY_DN22252_c0_g2_i4	tr|A0A1D5X2X6|A0A1D5X2X6_WHEAT	430	4.4e-71	277.7	84	A0A1D5X2X6_WHEAT	Uncharacterized protein	SubName: Full=Uncharacterized protein {ECO:0000313|EnsemblPlants:TRIAE_CS42_4AL_TGACv1_289223_AA0967540.2};
TRINITY_DN22252_c0_g2_i1	tr|M8D2U0|M8D2U0_AEGTA	345	1.9e-96	361.7	80.9	M8D2U0_AEGTA	Uncharacterized protein	SubName: Full=Uncharacterized protein {ECO:0000313|EMBL:EMT30586.1, ECO:0000313|EnsemblPlants:EMT30586};
TRINITY_DN22227_c0_g1_i3	tr|A0A1D5UBF1|A0A1D5UBF1_WHEAT	417	1.6e-167	597.8	93.7	A0A1D5UBF1_WHEAT	Uncharacterized protein	SubName: Full=Uncharacterized protein {ECO:0000313|EnsemblPlants:TRIAE_CS42_2BS_TGACv1_146861_AA0474090.1};
TRINITY_DN22227_c0_g1_i5	tr|A0A1D5UBF1|A0A1D5UBF1_WHEAT	417	1.5e-171	611.3	93.8	A0A1D5UBF1_WHEAT	Uncharacterized protein	SubName: Full=Uncharacterized protein {ECO:0000313|EnsemblPlants:TRIAE_CS42_2BS_TGACv1_146861_AA0474090.1};
TRINITY_DN22227_c0_g1_i2	tr|A0A1D5UBF1|A0A1D5UBF1_WHEAT	417	9.5e-171	608.6	93.8	A0A1D5UBF1_WHEAT	Uncharacterized protein	SubName: Full=Uncharacterized protein {ECO:0000313|EnsemblPlants:TRIAE_CS42_2BS_TGACv1_146861_AA0474090.1};
TRINITY_DN22227_c0_g1_i6	tr|A0A1D5UBF1|A0A1D5UBF1_WHEAT	417	1.5e-171	611.3	93.8	A0A1D5UBF1_WHEAT	Uncharacterized protein	SubName: Full=Uncharacterized protein {ECO:0000313|EnsemblPlants:TRIAE_CS42_2BS_TGACv1_146861_AA0474090.1};
TRINITY_DN22227_c0_g1_i7	tr|A0A1D5TLX3|A0A1D5TLX3_WHEAT	269	3.2e-138	500	90.8	A0A1D5TLX3_WHEAT	Uncharacterized protein	SubName: Full=Uncharacterized protein {ECO:0000313|EnsemblPlants:TRIAE_CS42_2AS_TGACv1_112912_AA0347530.1};
TRINITY_DN22227_c0_g1_i4	tr|A0A1D5TLX3|A0A1D5TLX3_WHEAT	417	2.8e-178	633.6	93.8	A0A1D5TLX3_WHEAT	Uncharacterized protein	SubName: Full=Uncharacterized protein {ECO:0000313|EnsemblPlants:TRIAE_CS42_2AS_TGACv1_112912_AA0347530.1};
TRINITY_DN22227_c0_g1_i1	tr|A0A1D5UYH8|A0A1D5UYH8_WHEAT	411	1.7e-180	641	94	A0A1D5UYH8_WHEAT	Uncharacterized protein	SubName: Full=Uncharacterized protein {ECO:0000313|EnsemblPlants:TRIAE_CS42_2DS_TGACv1_177854_AA0586100.1};
TRINITY_DN22227_c0_g2_i1	tr|A0A1D5UL90|A0A1D5UL90_WHEAT	353	5.8e-147	529.3	99.8	A0A1D5UL90_WHEAT	Uncharacterized protein	SubName: Full=Uncharacterized protein {ECO:0000313|EnsemblPlants:TRIAE_CS42_2DL_TGACv1_158875_AA0527720.1};
TRINITY_DN22218_c0_g1_i3	tr|M7ZYB4|M7ZYB4_TRIUA	54	9.5e-20	106.7	15.1	M7ZYB4_TRIUA	Eukaryotic translation initiation factor 2A	SubName: Full=Eukaryotic translation initiation factor 2A {ECO:0000313|EMBL:EMS68178.1, ECO:0000313|EnsemblPlants:TRIUR3_16792-P1};
TRINITY_DN22218_c0_g1_i6	tr|M7ZYB4|M7ZYB4_TRIUA	54	1e-19	106.7	13.8	M7ZYB4_TRIUA	Eukaryotic translation initiation factor 2A	SubName: Full=Eukaryotic translation initiation factor 2A {ECO:0000313|EMBL:EMS68178.1, ECO:0000313|EnsemblPlants:TRIUR3_16792-P1};
TRINITY_DN22218_c0_g1_i7	tr|M7ZYB4|M7ZYB4_TRIUA	54	5.7e-19	104	16.3	M7ZYB4_TRIUA	Eukaryotic translation initiation factor 2A	SubName: Full=Eukaryotic translation initiation factor 2A {ECO:0000313|EMBL:EMS68178.1, ECO:0000313|EnsemblPlants:TRIUR3_16792-P1};
TRINITY_DN22218_c0_g1_i5	tr|M7ZYB4|M7ZYB4_TRIUA	54	5e-19	104	18.6	M7ZYB4_TRIUA	Eukaryotic translation initiation factor 2A	SubName: Full=Eukaryotic translation initiation factor 2A {ECO:0000313|EMBL:EMS68178.1, ECO:0000313|EnsemblPlants:TRIUR3_16792-P1};
TRINITY_DN22218_c0_g1_i11	tr|M7ZYB4|M7ZYB4_TRIUA	54	6.1e-19	104	15.1	M7ZYB4_TRIUA	Eukaryotic translation initiation factor 2A	SubName: Full=Eukaryotic translation initiation factor 2A {ECO:0000313|EMBL:EMS68178.1, ECO:0000313|EnsemblPlants:TRIUR3_16792-P1};
TRINITY_DN22218_c0_g1_i8	tr|M7ZYB4|M7ZYB4_TRIUA	54	6.4e-19	104	14.5	M7ZYB4_TRIUA	Eukaryotic translation initiation factor 2A	SubName: Full=Eukaryotic translation initiation factor 2A {ECO:0000313|EMBL:EMS68178.1, ECO:0000313|EnsemblPlants:TRIUR3_16792-P1};
TRINITY_DN22218_c0_g1_i15	tr|M7ZYB4|M7ZYB4_TRIUA	54	8.2e-20	106.7	17.4	M7ZYB4_TRIUA	Eukaryotic translation initiation factor 2A	SubName: Full=Eukaryotic translation initiation factor 2A {ECO:0000313|EMBL:EMS68178.1, ECO:0000313|EnsemblPlants:TRIUR3_16792-P1};
TRINITY_DN22218_c1_g1_i6	tr|F2DVD1|F2DVD1_HORVV	36	7.9e-08	67.8	6.2	F2DVD1_HORVV	Predicted protein	SubName: Full=Predicted protein {ECO:0000313|EMBL:BAJ99052.1};
TRINITY_DN22218_c1_g1_i5	tr|F2DVD1|F2DVD1_HORVV	37	1.9e-08	70.1	5.3	F2DVD1_HORVV	Predicted protein	SubName: Full=Predicted protein {ECO:0000313|EMBL:BAJ99052.1};
TRINITY_DN22218_c1_g1_i7	tr|F2DVD1|F2DVD1_HORVV	36	9.4e-08	67.8	5.2	F2DVD1_HORVV	Predicted protein	SubName: Full=Predicted protein {ECO:0000313|EMBL:BAJ99052.1};
TRINITY_DN22218_c1_g1_i2	tr|F2DVD1|F2DVD1_HORVV	37	3.4e-09	70.1	29.9	F2DVD1_HORVV	Predicted protein	SubName: Full=Predicted protein {ECO:0000313|EMBL:BAJ99052.1};
TRINITY_DN22218_c1_g1_i1	tr|F2DVD1|F2DVD1_HORVV	36	7.9e-08	67.8	6.2	F2DVD1_HORVV	Predicted protein	SubName: Full=Predicted protein {ECO:0000313|EMBL:BAJ99052.1};
TRINITY_DN22281_c0_g1_i1	tr|A0A1D6A3M8|A0A1D6A3M8_WHEAT	97	2.9e-46	193.4	71.7	A0A1D6A3M8_WHEAT	Uncharacterized protein	SubName: Full=Uncharacterized protein {ECO:0000313|EnsemblPlants:TRIAE_CS42_5DS_TGACv1_457655_AA1488630.1};
TRINITY_DN22281_c0_g2_i6	tr|A0A1D5YWF2|A0A1D5YWF2_WHEAT	184	2e-72	280.8	94.4	A0A1D5YWF2_WHEAT	Uncharacterized protein	SubName: Full=Uncharacterized protein {ECO:0000313|EnsemblPlants:TRIAE_CS42_5AS_TGACv1_395558_AA1283110.1};
TRINITY_DN22281_c0_g2_i7	tr|A0A1D5YWF2|A0A1D5YWF2_WHEAT	184	1.4e-70	274.6	94.4	A0A1D5YWF2_WHEAT	Uncharacterized protein	SubName: Full=Uncharacterized protein {ECO:0000313|EnsemblPlants:TRIAE_CS42_5AS_TGACv1_395558_AA1283110.1};
TRINITY_DN22281_c0_g2_i5	tr|A0A1D6A3M8|A0A1D6A3M8_WHEAT	197	5.3e-73	282.7	100	A0A1D6A3M8_WHEAT	Uncharacterized protein	SubName: Full=Uncharacterized protein {ECO:0000313|EnsemblPlants:TRIAE_CS42_5DS_TGACv1_457655_AA1488630.1};
TRINITY_DN22281_c0_g2_i4	tr|A0A1D5YWF2|A0A1D5YWF2_WHEAT	183	3.5e-45	190.3	94.4	A0A1D5YWF2_WHEAT	Uncharacterized protein	SubName: Full=Uncharacterized protein {ECO:0000313|EnsemblPlants:TRIAE_CS42_5AS_TGACv1_395558_AA1283110.1};
TRINITY_DN22281_c0_g2_i3	tr|A0A1D5YWF2|A0A1D5YWF2_WHEAT	183	2.9e-52	213.8	94.4	A0A1D5YWF2_WHEAT	Uncharacterized protein	SubName: Full=Uncharacterized protein {ECO:0000313|EnsemblPlants:TRIAE_CS42_5AS_TGACv1_395558_AA1283110.1};
TRINITY_DN22281_c0_g2_i1	tr|A0A1D5YWF2|A0A1D5YWF2_WHEAT	184	4.1e-38	166.8	94.4	A0A1D5YWF2_WHEAT	Uncharacterized protein	SubName: Full=Uncharacterized protein {ECO:0000313|EnsemblPlants:TRIAE_CS42_5AS_TGACv1_395558_AA1283110.1};
TRINITY_DN22204_c0_g2_i1	tr|N1R3A5|N1R3A5_AEGTA	53	1.9e-05	58.2	29.4	N1R3A5_AEGTA	Uncharacterized protein	SubName: Full=Uncharacterized protein {ECO:0000313|EMBL:EMT15503.1, ECO:0000313|EnsemblPlants:EMT15503};
TRINITY_DN22204_c0_g1_i9	tr|M8CM45|M8CM45_AEGTA	34	4.4e-08	67.8	10.6	M8CM45_AEGTA	Uncharacterized protein	SubName: Full=Uncharacterized protein {ECO:0000313|EMBL:EMT24536.1, ECO:0000313|EnsemblPlants:EMT24536};
TRINITY_DN22204_c0_g1_i11	tr|A0A1D6DGE8|A0A1D6DGE8_WHEAT	40	2.7e-14	89	8.6	A0A1D6DGE8_WHEAT	Uncharacterized protein	SubName: Full=Uncharacterized protein {ECO:0000313|EnsemblPlants:TRIAE_CS42_U_TGACv1_642613_AA2120320.1};
TRINITY_DN22204_c0_g1_i12	tr|M8B557|M8B557_TRIUA	29	1.2e-07	64.7	28	M8B557_TRIUA	Uncharacterized protein	SubName: Full=Uncharacterized protein {ECO:0000313|EMBL:EMS68769.1, ECO:0000313|EnsemblPlants:TRIUR3_28123-P1};
TRINITY_DN22204_c0_g1_i3	tr|A0A1D6DGE8|A0A1D6DGE8_WHEAT	40	2.1e-14	89	10.8	A0A1D6DGE8_WHEAT	Uncharacterized protein	SubName: Full=Uncharacterized protein {ECO:0000313|EnsemblPlants:TRIAE_CS42_U_TGACv1_642613_AA2120320.1};
TRINITY_DN22204_c0_g1_i7	tr|M8CM45|M8CM45_AEGTA	34	5.7e-08	67.8	8.1	M8CM45_AEGTA	Uncharacterized protein	SubName: Full=Uncharacterized protein {ECO:0000313|EMBL:EMT24536.1, ECO:0000313|EnsemblPlants:EMT24536};
TRINITY_DN22204_c0_g1_i6	tr|M8B557|M8B557_TRIUA	29	1.2e-07	64.7	28.1	M8B557_TRIUA	Uncharacterized protein	SubName: Full=Uncharacterized protein {ECO:0000313|EMBL:EMS68769.1, ECO:0000313|EnsemblPlants:TRIUR3_28123-P1};
TRINITY_DN22268_c0_g1_i3	tr|M8BXG6|M8BXG6_AEGTA	139	1.1e-48	201.4	99.3	M8BXG6_AEGTA	Uncharacterized protein	SubName: Full=Uncharacterized protein {ECO:0000313|EMBL:EMT11524.1, ECO:0000313|EnsemblPlants:EMT11524};
TRINITY_DN22268_c0_g1_i1	tr|M8BQN1|M8BQN1_AEGTA	61	4.2e-05	56.2	56.3	M8BQN1_AEGTA	Uncharacterized protein	SubName: Full=Uncharacterized protein {ECO:0000313|EMBL:EMT27300.1, ECO:0000313|EnsemblPlants:EMT27300};
TRINITY_DN22231_c0_g1_i5	tr|T1NN71|T1NN71_TRIUA	91	1e-42	181.8	57.4	T1NN71_TRIUA	Uncharacterized protein	SubName: Full=Uncharacterized protein {ECO:0000313|EnsemblPlants:TRIUR3_32192-P1};
TRINITY_DN22231_c0_g1_i3	tr|A0A1D5V780|A0A1D5V780_WHEAT	67	2.2e-26	126.3	99	A0A1D5V780_WHEAT	Uncharacterized protein	SubName: Full=Uncharacterized protein {ECO:0000313|EnsemblPlants:TRIAE_CS42_3AL_TGACv1_194230_AA0629130.1};
TRINITY_DN22231_c0_g1_i6	tr|A0A1D5ZEU9|A0A1D5ZEU9_WHEAT	64	1.2e-24	121.3	57.7	A0A1D5ZEU9_WHEAT	Uncharacterized protein	SubName: Full=Uncharacterized protein {ECO:0000313|EnsemblPlants:TRIAE_CS42_5BS_TGACv1_423301_AA1373810.1};
TRINITY_DN22231_c0_g1_i4	tr|R7WF45|R7WF45_AEGTA	49	5.9e-19	102.4	41.1	R7WF45_AEGTA	Uncharacterized protein	SubName: Full=Uncharacterized protein {ECO:0000313|EMBL:EMT19550.1, ECO:0000313|EnsemblPlants:EMT19550};
TRINITY_DN22231_c0_g1_i1	tr|A0A1D5ZEU7|A0A1D5ZEU7_WHEAT	64	1.1e-25	124.8	52.9	A0A1D5ZEU7_WHEAT	Uncharacterized protein	SubName: Full=Uncharacterized protein {ECO:0000313|EnsemblPlants:TRIAE_CS42_5BS_TGACv1_423301_AA1373800.1};
TRINITY_DN22231_c0_g1_i10	tr|A0A1D5VZA0|A0A1D5VZA0_WHEAT	104	2.2e-44	187.2	71.7	A0A1D5VZA0_WHEAT	Uncharacterized protein	SubName: Full=Uncharacterized protein {ECO:0000313|EnsemblPlants:TRIAE_CS42_3B_TGACv1_222593_AA0767490.2};
TRINITY_DN22231_c0_g1_i11	tr|R7WF45|R7WF45_AEGTA	49	6.2e-19	102.4	39.5	R7WF45_AEGTA	Uncharacterized protein	SubName: Full=Uncharacterized protein {ECO:0000313|EMBL:EMT19550.1, ECO:0000313|EnsemblPlants:EMT19550};
TRINITY_DN22231_c0_g1_i8	tr|A0A1D6A439|A0A1D6A439_WHEAT	68	1e-31	144.1	99	A0A1D6A439_WHEAT	Uncharacterized protein	SubName: Full=Uncharacterized protein {ECO:0000313|EnsemblPlants:TRIAE_CS42_5DS_TGACv1_457915_AA1490780.2};
TRINITY_DN22231_c0_g1_i2	tr|T1NN71|T1NN71_TRIUA	91	1.2e-42	181.4	64.8	T1NN71_TRIUA	Uncharacterized protein	SubName: Full=Uncharacterized protein {ECO:0000313|EnsemblPlants:TRIUR3_32192-P1};
TRINITY_DN22231_c1_g1_i2	tr|M7ZNM0|M7ZNM0_TRIUA	25	8.3e-05	56.6	9.5	M7ZNM0_TRIUA	Uncharacterized protein	SubName: Full=Uncharacterized protein {ECO:0000313|EMBL:EMS53945.1, ECO:0000313|EnsemblPlants:TRIUR3_06020-P1};
TRINITY_DN22231_c1_g1_i1	tr|M7ZNM0|M7ZNM0_TRIUA	25	9.1e-05	56.6	8.6	M7ZNM0_TRIUA	Uncharacterized protein	SubName: Full=Uncharacterized protein {ECO:0000313|EMBL:EMS53945.1, ECO:0000313|EnsemblPlants:TRIUR3_06020-P1};
TRINITY_DN22205_c0_g1_i2	tr|A0A1D5YBA9|A0A1D5YBA9_WHEAT	362	1.3e-181	644.8	76.6	A0A1D5YBA9_WHEAT	Uncharacterized protein	SubName: Full=Uncharacterized protein {ECO:0000313|EnsemblPlants:TRIAE_CS42_5AL_TGACv1_374004_AA1187460.1};
TRINITY_DN22205_c0_g1_i1	tr|A0A1D5ZY73|A0A1D5ZY73_WHEAT	365	2e-187	664.1	76.8	A0A1D5ZY73_WHEAT	Uncharacterized protein	SubName: Full=Uncharacterized protein {ECO:0000313|EnsemblPlants:TRIAE_CS42_5DL_TGACv1_436414_AA1460830.1};
TRINITY_DN22205_c0_g1_i3	tr|A0A1D5YBA9|A0A1D5YBA9_WHEAT	362	3e-183	650.2	76.7	A0A1D5YBA9_WHEAT	Uncharacterized protein	SubName: Full=Uncharacterized protein {ECO:0000313|EnsemblPlants:TRIAE_CS42_5AL_TGACv1_374004_AA1187460.1};
TRINITY_DN22292_c0_g1_i6	tr|A0A1D5WG91|A0A1D5WG91_WHEAT	219	9.7e-117	429.5	40.2	A0A1D5WG91_WHEAT	Uncharacterized protein	SubName: Full=Uncharacterized protein {ECO:0000313|EnsemblPlants:TRIAE_CS42_3DL_TGACv1_249727_AA0855300.1};
TRINITY_DN22292_c0_g1_i4	tr|A0A1D5WG92|A0A1D5WG92_WHEAT	374	5.7e-212	746.1	56.5	A0A1D5WG92_WHEAT	Uncharacterized protein	SubName: Full=Uncharacterized protein {ECO:0000313|EnsemblPlants:TRIAE_CS42_3DL_TGACv1_249727_AA0855300.2};
TRINITY_DN22292_c0_g1_i1	tr|A0A1D5WG92|A0A1D5WG92_WHEAT	379	3.7e-215	756.9	50	A0A1D5WG92_WHEAT	Uncharacterized protein	SubName: Full=Uncharacterized protein {ECO:0000313|EnsemblPlants:TRIAE_CS42_3DL_TGACv1_249727_AA0855300.2};
TRINITY_DN22292_c0_g1_i2	tr|A0A1D5WG92|A0A1D5WG92_WHEAT	379	3.6e-215	756.9	51	A0A1D5WG92_WHEAT	Uncharacterized protein	SubName: Full=Uncharacterized protein {ECO:0000313|EnsemblPlants:TRIAE_CS42_3DL_TGACv1_249727_AA0855300.2};
TRINITY_DN22293_c0_g1_i4	tr|A0A1D6BRT3|A0A1D6BRT3_WHEAT	119	1.8e-58	234.2	72.1	A0A1D6BRT3_WHEAT	Glycosyltransferase	SubName: Full=Glycosyltransferase {ECO:0000313|EnsemblPlants:TRIAE_CS42_7AL_TGACv1_559924_AA1801280.2};
TRINITY_DN22293_c0_g1_i2	tr|M8BJ49|M8BJ49_AEGTA	119	3e-57	230.3	62.5	M8BJ49_AEGTA	Glycosyltransferase	RecName: Full=Glycosyltransferase {ECO:0000256|RuleBase:RU362057}; EC=2.4.1.- {ECO:0000256|RuleBase:RU362057};
TRINITY_DN22293_c0_g1_i1	tr|M8BJ49|M8BJ49_AEGTA	119	4.2e-59	236.5	62.5	M8BJ49_AEGTA	Glycosyltransferase	RecName: Full=Glycosyltransferase {ECO:0000256|RuleBase:RU362057}; EC=2.4.1.- {ECO:0000256|RuleBase:RU362057};
TRINITY_DN22276_c0_g2_i1	tr|A0A1D6D8F5|A0A1D6D8F5_WHEAT	48	4.8e-05	59.7	3.7	A0A1D6D8F5_WHEAT	Uncharacterized protein	SubName: Full=Uncharacterized protein {ECO:0000313|EnsemblPlants:TRIAE_CS42_U_TGACv1_640941_AA2079970.1};
TRINITY_DN22276_c0_g2_i3	tr|A0A1D6D8F5|A0A1D6D8F5_WHEAT	48	3.2e-05	59.7	5.6	A0A1D6D8F5_WHEAT	Uncharacterized protein	SubName: Full=Uncharacterized protein {ECO:0000313|EnsemblPlants:TRIAE_CS42_U_TGACv1_640941_AA2079970.1};
TRINITY_DN22276_c0_g2_i7	tr|A0A1D6D8F5|A0A1D6D8F5_WHEAT	48	4.8e-05	59.7	3.7	A0A1D6D8F5_WHEAT	Uncharacterized protein	SubName: Full=Uncharacterized protein {ECO:0000313|EnsemblPlants:TRIAE_CS42_U_TGACv1_640941_AA2079970.1};
TRINITY_DN22276_c0_g2_i8	tr|A0A1D6D8F5|A0A1D6D8F5_WHEAT	48	4.2e-05	59.7	4.2	A0A1D6D8F5_WHEAT	Uncharacterized protein	SubName: Full=Uncharacterized protein {ECO:0000313|EnsemblPlants:TRIAE_CS42_U_TGACv1_640941_AA2079970.1};
TRINITY_DN22276_c0_g2_i2	tr|A0A1D6D8F5|A0A1D6D8F5_WHEAT	48	4.2e-05	59.7	4.2	A0A1D6D8F5_WHEAT	Uncharacterized protein	SubName: Full=Uncharacterized protein {ECO:0000313|EnsemblPlants:TRIAE_CS42_U_TGACv1_640941_AA2079970.1};
TRINITY_DN22276_c0_g2_i6	tr|A0A1D5ZHC9|A0A1D5ZHC9_WHEAT	28	0.00014	53.9	39.4	A0A1D5ZHC9_WHEAT	Uncharacterized protein	SubName: Full=Uncharacterized protein {ECO:0000313|EnsemblPlants:TRIAE_CS42_5BS_TGACv1_424280_AA1388440.1};
TRINITY_DN22248_c0_g1_i1	tr|A0A1U7ZJL3|A0A1U7ZJL3_NELNU	56	4.6e-08	67.8	15.9	A0A1U7ZJL3_NELNU	heat shock 70 kDa protein 15-like	SubName: Full=heat shock 70 kDa protein 15-like {ECO:0000313|RefSeq:XP_010254149.1, ECO:0000313|RefSeq:XP_010254150.1, ECO:0000313|RefSeq:XP_010254151.1};
TRINITY_DN22248_c1_g1_i1	tr|A0A1U7ZJL3|A0A1U7ZJL3_NELNU	35	7.4e-05	55.5	32.9	A0A1U7ZJL3_NELNU	heat shock 70 kDa protein 15-like	SubName: Full=heat shock 70 kDa protein 15-like {ECO:0000313|RefSeq:XP_010254149.1, ECO:0000313|RefSeq:XP_010254150.1, ECO:0000313|RefSeq:XP_010254151.1};
TRINITY_DN22210_c0_g1_i14	tr|A0A1D5VPG9|A0A1D5VPG9_WHEAT	50	5e-11	77.4	17.2	A0A1D5VPG9_WHEAT	Uncharacterized protein	SubName: Full=Uncharacterized protein {ECO:0000313|EnsemblPlants:TRIAE_CS42_3B_TGACv1_220728_AA0717240.4};
TRINITY_DN22210_c0_g1_i13	tr|A0A1D5VPG9|A0A1D5VPG9_WHEAT	54	7.3e-21	109.4	30.2	A0A1D5VPG9_WHEAT	Uncharacterized protein	SubName: Full=Uncharacterized protein {ECO:0000313|EnsemblPlants:TRIAE_CS42_3B_TGACv1_220728_AA0717240.4};
TRINITY_DN22210_c0_g1_i9	tr|A0A1D5VPG9|A0A1D5VPG9_WHEAT	50	8.3e-11	77.4	10.3	A0A1D5VPG9_WHEAT	Uncharacterized protein	SubName: Full=Uncharacterized protein {ECO:0000313|EnsemblPlants:TRIAE_CS42_3B_TGACv1_220728_AA0717240.4};
TRINITY_DN22210_c0_g1_i3	tr|A0A1D5VPG9|A0A1D5VPG9_WHEAT	50	8.9e-11	77.4	9.7	A0A1D5VPG9_WHEAT	Uncharacterized protein	SubName: Full=Uncharacterized protein {ECO:0000313|EnsemblPlants:TRIAE_CS42_3B_TGACv1_220728_AA0717240.4};
TRINITY_DN22210_c0_g1_i6	tr|M7ZKL7|M7ZKL7_TRIUA	81	2.8e-13	83.2	89.6	M7ZKL7_TRIUA	Uncharacterized protein	SubName: Full=Uncharacterized protein {ECO:0000313|EMBL:EMS60657.1, ECO:0000313|EnsemblPlants:TRIUR3_32433-P1};
TRINITY_DN22210_c0_g1_i12	tr|A0A1D5VEG8|A0A1D5VEG8_WHEAT	41	1.4e-12	80.9	46.2	A0A1D5VEG8_WHEAT	Uncharacterized protein	SubName: Full=Uncharacterized protein {ECO:0000313|EnsemblPlants:TRIAE_CS42_3AL_TGACv1_196613_AA0661960.3};
TRINITY_DN22210_c0_g1_i1	tr|A0A1D5VPG9|A0A1D5VPG9_WHEAT	38	5.7e-11	77.8	8.8	A0A1D5VPG9_WHEAT	Uncharacterized protein	SubName: Full=Uncharacterized protein {ECO:0000313|EnsemblPlants:TRIAE_CS42_3B_TGACv1_220728_AA0717240.4};
TRINITY_DN22210_c0_g1_i4	tr|A0A1D5VPG9|A0A1D5VPG9_WHEAT	50	8.8e-11	77.4	9.7	A0A1D5VPG9_WHEAT	Uncharacterized protein	SubName: Full=Uncharacterized protein {ECO:0000313|EnsemblPlants:TRIAE_CS42_3B_TGACv1_220728_AA0717240.4};
TRINITY_DN22210_c0_g1_i11	tr|A0A1D5VPG9|A0A1D5VPG9_WHEAT	38	3.1e-11	77.8	15.9	A0A1D5VPG9_WHEAT	Uncharacterized protein	SubName: Full=Uncharacterized protein {ECO:0000313|EnsemblPlants:TRIAE_CS42_3B_TGACv1_220728_AA0717240.4};
TRINITY_DN22277_c0_g1_i3	tr|A0A1D6RNX0|A0A1D6RNX0_WHEAT	307	3e-161	577	70.7	A0A1D6RNX0_WHEAT	Uncharacterized protein	SubName: Full=Uncharacterized protein {ECO:0000313|EnsemblPlants:TRIAE_CS42_2DL_TGACv1_159370_AA0537280.2};
TRINITY_DN22277_c0_g1_i1	tr|A0A1D6RNX0|A0A1D6RNX0_WHEAT	307	3.5e-161	576.6	79.8	A0A1D6RNX0_WHEAT	Uncharacterized protein	SubName: Full=Uncharacterized protein {ECO:0000313|EnsemblPlants:TRIAE_CS42_2DL_TGACv1_159370_AA0537280.2};
TRINITY_DN22277_c0_g2_i1	tr|A0A1D5TWR2|A0A1D5TWR2_WHEAT	315	4.1e-172	613.2	66.6	A0A1D5TWR2_WHEAT	Uncharacterized protein	SubName: Full=Uncharacterized protein {ECO:0000313|EnsemblPlants:TRIAE_CS42_2BL_TGACv1_129803_AA0396700.4};
TRINITY_DN22277_c0_g2_i2	tr|A0A1D5TWR2|A0A1D5TWR2_WHEAT	315	3.5e-172	613.2	79.1	A0A1D5TWR2_WHEAT	Uncharacterized protein	SubName: Full=Uncharacterized protein {ECO:0000313|EnsemblPlants:TRIAE_CS42_2BL_TGACv1_129803_AA0396700.4};
TRINITY_DN22277_c1_g1_i1	tr|A0A1D6DHS8|A0A1D6DHS8_WHEAT	113	1e-33	151.8	78.7	A0A1D6DHS8_WHEAT	Uncharacterized protein	SubName: Full=Uncharacterized protein {ECO:0000313|EnsemblPlants:TRIAE_CS42_U_TGACv1_643084_AA2127100.1};
TRINITY_DN22297_c0_g1_i1	tr|V4TBY1|V4TBY1_9ROSI	67	1.8e-22	114	62.4	V4TBY1_9ROSI	Uncharacterized protein	SubName: Full=Uncharacterized protein {ECO:0000313|EMBL:ESR57823.1}; Flags: Fragment;
TRINITY_DN22297_c0_g2_i1	tr|A0A1D6AXZ9|A0A1D6AXZ9_WHEAT	34	1.5e-06	60.5	50.5	A0A1D6AXZ9_WHEAT	Uncharacterized protein	SubName: Full=Uncharacterized protein {ECO:0000313|EnsemblPlants:TRIAE_CS42_6BS_TGACv1_513982_AA1653410.1};
TRINITY_DN22280_c0_g1_i1	tr|K3XVB6|K3XVB6_SETIT	83	1.6e-39	170.2	100	K3XVB6_SETIT	Ribonucleoside-diphosphate reductase	RecName: Full=Ribonucleoside-diphosphate reductase {ECO:0000256|RuleBase:RU003410}; EC=1.17.4.1 {ECO:0000256|RuleBase:RU003410};
TRINITY_DN22280_c0_g2_i1	tr|A0A287V2V3|A0A287V2V3_HORVV	279	5.6e-155	557.8	21.7	A0A287V2V3_HORVV	Ribonucleoside-diphosphate reductase	RecName: Full=Ribonucleoside-diphosphate reductase {ECO:0000256|RuleBase:RU003410}; EC=1.17.4.1 {ECO:0000256|RuleBase:RU003410};
TRINITY_DN22280_c0_g2_i4	tr|A0A287V2V3|A0A287V2V3_HORVV	279	6.6e-155	557.8	18.5	A0A287V2V3_HORVV	Ribonucleoside-diphosphate reductase	RecName: Full=Ribonucleoside-diphosphate reductase {ECO:0000256|RuleBase:RU003410}; EC=1.17.4.1 {ECO:0000256|RuleBase:RU003410};
TRINITY_DN22280_c0_g2_i2	tr|A0A287V2V3|A0A287V2V3_HORVV	31	3e-07	67	2.4	A0A287V2V3_HORVV	Ribonucleoside-diphosphate reductase	RecName: Full=Ribonucleoside-diphosphate reductase {ECO:0000256|RuleBase:RU003410}; EC=1.17.4.1 {ECO:0000256|RuleBase:RU003410};
TRINITY_DN22280_c0_g2_i5	tr|A0A287V2V3|A0A287V2V3_HORVV	31	2.2e-07	67	3.3	A0A287V2V3_HORVV	Ribonucleoside-diphosphate reductase	RecName: Full=Ribonucleoside-diphosphate reductase {ECO:0000256|RuleBase:RU003410}; EC=1.17.4.1 {ECO:0000256|RuleBase:RU003410};
TRINITY_DN22280_c0_g2_i3	tr|A0A1D6AST7|A0A1D6AST7_WHEAT	212	1.3e-107	400.6	13.6	A0A1D6AST7_WHEAT	Ribonucleoside-diphosphate reductase	RecName: Full=Ribonucleoside-diphosphate reductase {ECO:0000256|RuleBase:RU003410}; EC=1.17.4.1 {ECO:0000256|RuleBase:RU003410};
TRINITY_DN22280_c0_g2_i6	tr|A0A1D6AST7|A0A1D6AST7_WHEAT	374	3.9e-218	765.8	99.7	A0A1D6AST7_WHEAT	Ribonucleoside-diphosphate reductase	RecName: Full=Ribonucleoside-diphosphate reductase {ECO:0000256|RuleBase:RU003410}; EC=1.17.4.1 {ECO:0000256|RuleBase:RU003410};
TRINITY_DN22280_c0_g3_i1	tr|A0A077RWW8|A0A077RWW8_WHEAT	84	4.7e-10	73.9	33.9	A0A077RWW8_WHEAT	Uncharacterized protein	SubName: Full=Uncharacterized protein {ECO:0000313|EMBL:CDM81718.1};
TRINITY_DN22280_c0_g3_i2	tr|A0A077RWW8|A0A077RWW8_WHEAT	81	7.2e-10	73.2	36.4	A0A077RWW8_WHEAT	Uncharacterized protein	SubName: Full=Uncharacterized protein {ECO:0000313|EMBL:CDM81718.1};
TRINITY_DN22280_c0_g4_i1	tr|M8A5D4|M8A5D4_TRIUA	242	4.4e-61	243.8	75.6	M8A5D4_TRIUA	Ribonucleoside-diphosphate reductase	RecName: Full=Ribonucleoside-diphosphate reductase {ECO:0000256|RuleBase:RU003410}; EC=1.17.4.1 {ECO:0000256|RuleBase:RU003410};
TRINITY_DN22280_c1_g1_i1	tr|M7ZWR4|M7ZWR4_TRIUA	49	2.9e-20	106.3	58.8	M7ZWR4_TRIUA	60S ribosomal protein L24	SubName: Full=60S ribosomal protein L24 {ECO:0000313|EMBL:EMS56850.1, ECO:0000313|EnsemblPlants:TRIUR3_19276-P1};
TRINITY_DN22299_c0_g1_i6	tr|M7ZXH8|M7ZXH8_TRIUA	46	1.6e-16	95.1	23.5	M7ZXH8_TRIUA	Uncharacterized protein	SubName: Full=Uncharacterized protein {ECO:0000313|EMBL:EMS64371.1, ECO:0000313|EnsemblPlants:TRIUR3_30544-P1};
TRINITY_DN22299_c0_g1_i3	tr|M8A6A7|M8A6A7_TRIUA	34	2.2e-07	64.3	23	M8A6A7_TRIUA	Uncharacterized protein	SubName: Full=Uncharacterized protein {ECO:0000313|EMBL:EMS60240.1, ECO:0000313|EnsemblPlants:TRIUR3_10414-P1};
TRINITY_DN22299_c0_g1_i2	tr|M7ZXH8|M7ZXH8_TRIUA	46	1.5e-18	102.1	20.4	M7ZXH8_TRIUA	Uncharacterized protein	SubName: Full=Uncharacterized protein {ECO:0000313|EMBL:EMS64371.1, ECO:0000313|EnsemblPlants:TRIUR3_30544-P1};
TRINITY_DN22299_c0_g1_i1	tr|M8A6A7|M8A6A7_TRIUA	31	4.9e-07	63.5	16.3	M8A6A7_TRIUA	Uncharacterized protein	SubName: Full=Uncharacterized protein {ECO:0000313|EMBL:EMS60240.1, ECO:0000313|EnsemblPlants:TRIUR3_10414-P1};
TRINITY_DN22299_c0_g1_i4	tr|M8A6A7|M8A6A7_TRIUA	31	5.4e-07	63.5	14.7	M8A6A7_TRIUA	Uncharacterized protein	SubName: Full=Uncharacterized protein {ECO:0000313|EMBL:EMS60240.1, ECO:0000313|EnsemblPlants:TRIUR3_10414-P1};
TRINITY_DN22275_c0_g1_i4	tr|A0A1D6BHI5|A0A1D6BHI5_WHEAT	499	7.8e-275	954.9	78.2	A0A1D6BHI5_WHEAT	Uncharacterized protein	SubName: Full=Uncharacterized protein {ECO:0000313|EnsemblPlants:TRIAE_CS42_7AL_TGACv1_556026_AA1753070.1};
TRINITY_DN22275_c0_g1_i3	tr|A0A1D5XZJ6|A0A1D5XZJ6_WHEAT	463	2.4e-229	803.5	87.4	A0A1D5XZJ6_WHEAT	Uncharacterized protein	SubName: Full=Uncharacterized protein {ECO:0000313|EnsemblPlants:TRIAE_CS42_4DL_TGACv1_343177_AA1131110.1};
TRINITY_DN22275_c0_g1_i1	tr|A0A1D6BHI5|A0A1D6BHI5_WHEAT	499	2.8e-275	956.4	74.9	A0A1D6BHI5_WHEAT	Uncharacterized protein	SubName: Full=Uncharacterized protein {ECO:0000313|EnsemblPlants:TRIAE_CS42_7AL_TGACv1_556026_AA1753070.1};
TRINITY_DN22275_c0_g1_i2	tr|A0A1D6BHI5|A0A1D6BHI5_WHEAT	466	3.8e-251	875.9	87.5	A0A1D6BHI5_WHEAT	Uncharacterized protein	SubName: Full=Uncharacterized protein {ECO:0000313|EnsemblPlants:TRIAE_CS42_7AL_TGACv1_556026_AA1753070.1};
TRINITY_DN22275_c0_g1_i5	tr|A0A1D6CTI7|A0A1D6CTI7_WHEAT	244	3.2e-128	466.5	100	A0A1D6CTI7_WHEAT	Uncharacterized protein	SubName: Full=Uncharacterized protein {ECO:0000313|EnsemblPlants:TRIAE_CS42_7DL_TGACv1_604712_AA2000920.1};
TRINITY_DN22275_c0_g2_i1	tr|M8BPY8|M8BPY8_AEGTA	50	2.9e-19	104	29.6	M8BPY8_AEGTA	Uncharacterized protein	SubName: Full=Uncharacterized protein {ECO:0000313|EMBL:EMT05037.1, ECO:0000313|EnsemblPlants:EMT05037};
TRINITY_DN22275_c1_g1_i1	tr|A0A1D5YHA7|A0A1D5YHA7_WHEAT	79	7.9e-36	157.9	99.6	A0A1D5YHA7_WHEAT	Uncharacterized protein	SubName: Full=Uncharacterized protein {ECO:0000313|EnsemblPlants:TRIAE_CS42_5AL_TGACv1_375059_AA1215090.1};
TRINITY_DN22258_c0_g1_i1	tr|A0A1D6S6S5|A0A1D6S6S5_WHEAT	188	1.3e-70	274.6	99.3	A0A1D6S6S5_WHEAT	Uncharacterized protein	SubName: Full=Uncharacterized protein {ECO:0000313|EnsemblPlants:TRIAE_CS42_5DL_TGACv1_434098_AA1429120.2};
TRINITY_DN22225_c0_g1_i1	tr|W4ZLS2|W4ZLS2_WHEAT	70	8.7e-26	124.4	98.1	W4ZLS2_WHEAT	Uncharacterized protein	SubName: Full=Uncharacterized protein {ECO:0000313|EnsemblPlants:TRIAE_CS42_1AL_TGACv1_003618_AA0050750.1};
TRINITY_DN22225_c0_g2_i3	tr|T1M1N7|T1M1N7_TRIUA	119	1.1e-48	201.8	64.9	T1M1N7_TRIUA	Uncharacterized protein	SubName: Full=Uncharacterized protein {ECO:0000313|EnsemblPlants:TRIUR3_11343-P1};
TRINITY_DN22225_c0_g2_i2	tr|T1M1N7|T1M1N7_TRIUA	115	8.5e-49	202.2	62.3	T1M1N7_TRIUA	Uncharacterized protein	SubName: Full=Uncharacterized protein {ECO:0000313|EnsemblPlants:TRIUR3_11343-P1};
TRINITY_DN22225_c0_g2_i1	tr|T1M1N7|T1M1N7_TRIUA	116	1e-49	205.3	62.5	T1M1N7_TRIUA	Uncharacterized protein	SubName: Full=Uncharacterized protein {ECO:0000313|EnsemblPlants:TRIUR3_11343-P1};
TRINITY_DN22225_c1_g1_i2	tr|A0MPK6|A0MPK6_WHEAT	62	1.5e-27	131	53.9	A0MPK6_WHEAT	CBFIIId-D19	SubName: Full=CBFIIId-D19 {ECO:0000313|EMBL:ABK55371.1, ECO:0000313|EnsemblPlants:TRIAE_CS42_5DL_TGACv1_433013_AA1398110.1};
TRINITY_DN22225_c1_g1_i1	tr|A0MPK6|A0MPK6_WHEAT	62	5.5e-27	129	56.4	A0MPK6_WHEAT	CBFIIId-D19	SubName: Full=CBFIIId-D19 {ECO:0000313|EMBL:ABK55371.1, ECO:0000313|EnsemblPlants:TRIAE_CS42_5DL_TGACv1_433013_AA1398110.1};
TRINITY_DN22261_c0_g1_i10	tr|A0A1D5TL99|A0A1D5TL99_WHEAT	52	9.1e-23	116.3	19	A0A1D5TL99_WHEAT	Uncharacterized protein	SubName: Full=Uncharacterized protein {ECO:0000313|EnsemblPlants:TRIAE_CS42_2AS_TGACv1_112718_AA0343960.1};
TRINITY_DN22261_c0_g1_i7	tr|A0A1D5TL99|A0A1D5TL99_WHEAT	107	3.7e-53	216.9	52.3	A0A1D5TL99_WHEAT	Uncharacterized protein	SubName: Full=Uncharacterized protein {ECO:0000313|EnsemblPlants:TRIAE_CS42_2AS_TGACv1_112718_AA0343960.1};
TRINITY_DN22261_c0_g1_i3	tr|A0A1D5TL99|A0A1D5TL99_WHEAT	107	1.7e-50	208	52.3	A0A1D5TL99_WHEAT	Uncharacterized protein	SubName: Full=Uncharacterized protein {ECO:0000313|EnsemblPlants:TRIAE_CS42_2AS_TGACv1_112718_AA0343960.1};
TRINITY_DN22261_c0_g1_i1	tr|A0A1D5TL99|A0A1D5TL99_WHEAT	108	4.5e-54	219.5	67.5	A0A1D5TL99_WHEAT	Uncharacterized protein	SubName: Full=Uncharacterized protein {ECO:0000313|EnsemblPlants:TRIAE_CS42_2AS_TGACv1_112718_AA0343960.1};
TRINITY_DN22261_c0_g1_i5	tr|A0A1D5TL99|A0A1D5TL99_WHEAT	107	1e-50	208.4	66.9	A0A1D5TL99_WHEAT	Uncharacterized protein	SubName: Full=Uncharacterized protein {ECO:0000313|EnsemblPlants:TRIAE_CS42_2AS_TGACv1_112718_AA0343960.1};
TRINITY_DN22261_c0_g1_i9	tr|A0A1D5TL99|A0A1D5TL99_WHEAT	53	8.7e-24	119	31.5	A0A1D5TL99_WHEAT	Uncharacterized protein	SubName: Full=Uncharacterized protein {ECO:0000313|EnsemblPlants:TRIAE_CS42_2AS_TGACv1_112718_AA0343960.1};
TRINITY_DN22261_c0_g1_i4	tr|A0A1D5TL99|A0A1D5TL99_WHEAT	107	1.5e-50	208	61	A0A1D5TL99_WHEAT	Uncharacterized protein	SubName: Full=Uncharacterized protein {ECO:0000313|EnsemblPlants:TRIAE_CS42_2AS_TGACv1_112718_AA0343960.1};
TRINITY_DN22202_c0_g1_i8	tr|W5A4J6|W5A4J6_WHEAT	329	2.7e-170	607.1	77.4	W5A4J6_WHEAT	Uncharacterized protein	SubName: Full=Uncharacterized protein {ECO:0000313|EnsemblPlants:TRIAE_CS42_1BL_TGACv1_032555_AA0131430.1};
TRINITY_DN22202_c0_g1_i7	tr|R7W6W7|R7W6W7_AEGTA	230	1.3e-115	425.6	44.9	R7W6W7_AEGTA	O-methyltransferase ZRP4	SubName: Full=O-methyltransferase ZRP4 {ECO:0000313|EMBL:EMT17312.1, ECO:0000313|EnsemblPlants:EMT17312};
TRINITY_DN22202_c0_g1_i1	tr|R7W6W7|R7W6W7_AEGTA	37	4.3e-11	75.9	42.7	R7W6W7_AEGTA	O-methyltransferase ZRP4	SubName: Full=O-methyltransferase ZRP4 {ECO:0000313|EMBL:EMT17312.1, ECO:0000313|EnsemblPlants:EMT17312};
TRINITY_DN22202_c0_g1_i5	tr|R7W6W7|R7W6W7_AEGTA	329	2.9e-180	639.8	98.8	R7W6W7_AEGTA	O-methyltransferase ZRP4	SubName: Full=O-methyltransferase ZRP4 {ECO:0000313|EMBL:EMT17312.1, ECO:0000313|EnsemblPlants:EMT17312};
TRINITY_DN22202_c0_g1_i4	tr|M8B107|M8B107_AEGTA	359	1.3e-199	704.5	77.8	M8B107_AEGTA	O-methyltransferase ZRP4	SubName: Full=O-methyltransferase ZRP4 {ECO:0000313|EMBL:EMT10452.1, ECO:0000313|EnsemblPlants:EMT10452};
TRINITY_DN22202_c0_g1_i9	tr|R7W6W7|R7W6W7_AEGTA	329	1.8e-178	634.4	66	R7W6W7_AEGTA	O-methyltransferase ZRP4	SubName: Full=O-methyltransferase ZRP4 {ECO:0000313|EMBL:EMT17312.1, ECO:0000313|EnsemblPlants:EMT17312};
TRINITY_DN22202_c0_g1_i2	tr|A0A1D5SY36|A0A1D5SY36_WHEAT	359	6.3e-205	722.2	75.6	A0A1D5SY36_WHEAT	Uncharacterized protein	SubName: Full=Uncharacterized protein {ECO:0000313|EnsemblPlants:TRIAE_CS42_1DL_TGACv1_063010_AA0222970.1};
TRINITY_DN22202_c0_g1_i6	tr|M8C5N3|M8C5N3_AEGTA	221	1.8e-117	430.6	99.4	M8C5N3_AEGTA	O-methyltransferase ZRP4	SubName: Full=O-methyltransferase ZRP4 {ECO:0000313|EMBL:EMT10453.1, ECO:0000313|EnsemblPlants:EMT10453};
TRINITY_DN22202_c0_g1_i3	tr|A0A1D5SY36|A0A1D5SY36_WHEAT	359	3.1e-204	719.9	76.5	A0A1D5SY36_WHEAT	Uncharacterized protein	SubName: Full=Uncharacterized protein {ECO:0000313|EnsemblPlants:TRIAE_CS42_1DL_TGACv1_063010_AA0222970.1};
TRINITY_DN22202_c1_g1_i1	tr|A0A1D5SY35|A0A1D5SY35_WHEAT	99	7.1e-50	204.9	100	A0A1D5SY35_WHEAT	Uncharacterized protein	SubName: Full=Uncharacterized protein {ECO:0000313|EnsemblPlants:TRIAE_CS42_1DL_TGACv1_063010_AA0222950.1};
TRINITY_DN22286_c0_g1_i1	tr|M7Z3N1|M7Z3N1_TRIUA	96	1e-45	191	99.7	M7Z3N1_TRIUA	Proline-rich receptor-like protein kinase PERK8	SubName: Full=Proline-rich receptor-like protein kinase PERK8 {ECO:0000313|EMBL:EMS54101.1, ECO:0000313|EnsemblPlants:TRIUR3_04184-P1};
TRINITY_DN49807_c0_g1_i2	tr|M8A8K7|M8A8K7_TRIUA	37	4e-09	71.6	8.8	M8A8K7_TRIUA	Methionine aminopeptidase 1B, chloroplastic	SubName: Full=Methionine aminopeptidase 1B, chloroplastic {ECO:0000313|EMBL:EMS56814.1, ECO:0000313|EnsemblPlants:TRIUR3_28854-P1};
TRINITY_DN49807_c0_g1_i1	tr|M8A8K7|M8A8K7_TRIUA	37	3.8e-09	71.6	9.2	M8A8K7_TRIUA	Methionine aminopeptidase 1B, chloroplastic	SubName: Full=Methionine aminopeptidase 1B, chloroplastic {ECO:0000313|EMBL:EMS56814.1, ECO:0000313|EnsemblPlants:TRIUR3_28854-P1};
TRINITY_DN49814_c0_g1_i1	tr|A0A1D6CLL7|A0A1D6CLL7_WHEAT	127	3.3e-64	253.4	66.5	A0A1D6CLL7_WHEAT	Uncharacterized protein	SubName: Full=Uncharacterized protein {ECO:0000313|EnsemblPlants:TRIAE_CS42_7DL_TGACv1_602693_AA1965460.1};
TRINITY_DN49814_c0_g1_i5	tr|A0A1D6CLL7|A0A1D6CLL7_WHEAT	136	1.2e-68	268.5	59.2	A0A1D6CLL7_WHEAT	Uncharacterized protein	SubName: Full=Uncharacterized protein {ECO:0000313|EnsemblPlants:TRIAE_CS42_7DL_TGACv1_602693_AA1965460.1};
TRINITY_DN49814_c0_g1_i3	tr|A0A1D6CLL7|A0A1D6CLL7_WHEAT	127	1.5e-66	261.2	73.4	A0A1D6CLL7_WHEAT	Uncharacterized protein	SubName: Full=Uncharacterized protein {ECO:0000313|EnsemblPlants:TRIAE_CS42_7DL_TGACv1_602693_AA1965460.1};
TRINITY_DN49814_c0_g2_i1	tr|A0A172Q4F5|A0A172Q4F5_WHEAT	30	4e-05	55.8	40.2	A0A172Q4F5_WHEAT	Nicotianamine synthase	SubName: Full=Nicotianamine synthase {ECO:0000313|EMBL:AND77079.1};
TRINITY_DN49863_c0_g1_i1	tr|A0A1D5Z6Y7|A0A1D5Z6Y7_WHEAT	59	5.4e-15	89	53.3	A0A1D5Z6Y7_WHEAT	Uncharacterized protein	SubName: Full=Uncharacterized protein {ECO:0000313|EnsemblPlants:TRIAE_CS42_5BL_TGACv1_405821_AA1335760.2};
TRINITY_DN49895_c0_g1_i1	tr|A0A1D5WTG4|A0A1D5WTG4_WHEAT	75	3.3e-31	142.5	99.6	A0A1D5WTG4_WHEAT	Uncharacterized protein	SubName: Full=Uncharacterized protein {ECO:0000313|EnsemblPlants:TRIAE_CS42_3DS_TGACv1_272232_AA0917390.1};
TRINITY_DN49880_c0_g1_i1	tr|A0A1D5TAL9|A0A1D5TAL9_WHEAT	198	2.9e-70	273.9	86	A0A1D5TAL9_WHEAT	Uncharacterized protein	SubName: Full=Uncharacterized protein {ECO:0000313|EnsemblPlants:TRIAE_CS42_2AL_TGACv1_094098_AA0292530.1};
TRINITY_DN49880_c0_g2_i2	tr|M8C564|M8C564_AEGTA	38	1.6e-14	88.2	23.2	M8C564_AEGTA	Phosphoglycerate kinase	RecName: Full=Phosphoglycerate kinase {ECO:0000256|RuleBase:RU000532}; EC=2.7.2.3 {ECO:0000256|RuleBase:RU000532};
TRINITY_DN49880_c0_g2_i1	tr|A0A1D5S0L2|A0A1D5S0L2_WHEAT	144	1.8e-47	198.4	53.8	A0A1D5S0L2_WHEAT	Uncharacterized protein	SubName: Full=Uncharacterized protein {ECO:0000313|EnsemblPlants:TRIAE_CS42_1AS_TGACv1_018984_AA0057300.1};
TRINITY_DN49880_c0_g2_i3	tr|A0A1D5VPX5|A0A1D5VPX5_WHEAT	83	4.1e-27	131.3	19.8	A0A1D5VPX5_WHEAT	Uncharacterized protein	SubName: Full=Uncharacterized protein {ECO:0000313|EnsemblPlants:TRIAE_CS42_3B_TGACv1_220805_AA0719670.1};
TRINITY_DN49880_c1_g1_i2	tr|A0A1D5WWM3|A0A1D5WWM3_WHEAT	80	1.1e-16	94.7	73.8	A0A1D5WWM3_WHEAT	Uncharacterized protein	SubName: Full=Uncharacterized protein {ECO:0000313|EnsemblPlants:TRIAE_CS42_3DS_TGACv1_273711_AA0933040.1};
TRINITY_DN49838_c0_g1_i1	tr|M7ZWZ1|M7ZWZ1_TRIUA	56	3.8e-19	102.4	72.7	M7ZWZ1_TRIUA	Uncharacterized protein	SubName: Full=Uncharacterized protein {ECO:0000313|EMBL:EMS67693.1, ECO:0000313|EnsemblPlants:TRIUR3_32908-P1};
TRINITY_DN49838_c0_g1_i3	tr|M7ZWZ1|M7ZWZ1_TRIUA	34	1.1e-07	65.5	20.4	M7ZWZ1_TRIUA	Uncharacterized protein	SubName: Full=Uncharacterized protein {ECO:0000313|EMBL:EMS67693.1, ECO:0000313|EnsemblPlants:TRIUR3_32908-P1};
TRINITY_DN49838_c0_g2_i1	tr|F2EB00|F2EB00_HORVV	62	0.00018	54.3	53.6	F2EB00_HORVV	Predicted protein	SubName: Full=Predicted protein {ECO:0000313|EMBL:BAK04522.1};
TRINITY_DN49811_c0_g1_i1	tr|M8BWL7|M8BWL7_AEGTA	61	1.9e-19	104.4	42	M8BWL7_AEGTA	Uncharacterized protein	SubName: Full=Uncharacterized protein {ECO:0000313|EMBL:EMT26344.1, ECO:0000313|EnsemblPlants:EMT26344};
TRINITY_DN49867_c0_g1_i1	tr|A0A1D5VAF7|A0A1D5VAF7_WHEAT	79	1.3e-32	147.5	83.7	A0A1D5VAF7_WHEAT	Uncharacterized protein	SubName: Full=Uncharacterized protein {ECO:0000313|EnsemblPlants:TRIAE_CS42_3AL_TGACv1_195066_AA0644370.1};
TRINITY_DN49857_c0_g1_i1	tr|A0A1D5UKP6|A0A1D5UKP6_WHEAT	148	6.6e-78	300.1	36.6	A0A1D5UKP6_WHEAT	Serine/threonine-protein kinase	SubName: Full=Serine/threonine-protein kinase {ECO:0000313|EnsemblPlants:TRIAE_CS42_2DL_TGACv1_158719_AA0524910.4};
TRINITY_DN49857_c0_g1_i3	tr|R7WAL8|R7WAL8_AEGTA	68	5.7e-30	138.3	98.6	R7WAL8_AEGTA	Putative serine/threonine-protein kinase receptor	SubName: Full=Putative serine/threonine-protein kinase receptor {ECO:0000313|EMBL:EMT19251.1, ECO:0000313|EnsemblPlants:EMT19251};
TRINITY_DN49857_c0_g1_i6	tr|N1QSH2|N1QSH2_AEGTA	79	1.6e-36	160.2	99.2	N1QSH2_AEGTA	Putative serine/threonine-protein kinase receptor	SubName: Full=Putative serine/threonine-protein kinase receptor {ECO:0000313|EMBL:EMT02905.1, ECO:0000313|EnsemblPlants:EMT02905};
TRINITY_DN49857_c0_g1_i4	tr|A0A1D5UKP6|A0A1D5UKP6_WHEAT	206	5.5e-113	416.4	58.1	A0A1D5UKP6_WHEAT	Serine/threonine-protein kinase	SubName: Full=Serine/threonine-protein kinase {ECO:0000313|EnsemblPlants:TRIAE_CS42_2DL_TGACv1_158719_AA0524910.4};
TRINITY_DN49857_c0_g1_i5	tr|A0A1D5UKP6|A0A1D5UKP6_WHEAT	206	5.3e-113	416.8	46.6	A0A1D5UKP6_WHEAT	Serine/threonine-protein kinase	SubName: Full=Serine/threonine-protein kinase {ECO:0000313|EnsemblPlants:TRIAE_CS42_2DL_TGACv1_158719_AA0524910.4};
TRINITY_DN49857_c0_g3_i1	tr|A0A1D5UJC5|A0A1D5UJC5_WHEAT	143	5e-75	289.3	83	A0A1D5UJC5_WHEAT	Uncharacterized protein	SubName: Full=Uncharacterized protein {ECO:0000313|EnsemblPlants:TRIAE_CS42_2DL_TGACv1_158447_AA0518940.1};
TRINITY_DN49857_c0_g4_i1	tr|A0A1D6RJY7|A0A1D6RJY7_WHEAT	142	1.7e-53	218	53.2	A0A1D6RJY7_WHEAT	Uncharacterized protein	SubName: Full=Uncharacterized protein {ECO:0000313|EnsemblPlants:TRIAE_CS42_2AL_TGACv1_097111_AA0322990.1};
TRINITY_DN49828_c0_g1_i1	tr|A0A1D5XF64|A0A1D5XF64_WHEAT	235	5.9e-93	350.1	55	A0A1D5XF64_WHEAT	Uncharacterized protein	SubName: Full=Uncharacterized protein {ECO:0000313|EnsemblPlants:TRIAE_CS42_4BL_TGACv1_320254_AA1032580.1};
TRINITY_DN49828_c0_g1_i4	tr|A0A1D5XXF3|A0A1D5XXF3_WHEAT	235	3.7e-93	350.9	50.7	A0A1D5XXF3_WHEAT	Uncharacterized protein	SubName: Full=Uncharacterized protein {ECO:0000313|EnsemblPlants:TRIAE_CS42_4DL_TGACv1_342758_AA1121360.2};
TRINITY_DN49828_c0_g1_i5	tr|A0A1D5XXF3|A0A1D5XXF3_WHEAT	36	2e-07	64.7	20.7	A0A1D5XXF3_WHEAT	Uncharacterized protein	SubName: Full=Uncharacterized protein {ECO:0000313|EnsemblPlants:TRIAE_CS42_4DL_TGACv1_342758_AA1121360.2};
TRINITY_DN49828_c0_g1_i2	tr|A0A1D5XF64|A0A1D5XF64_WHEAT	235	9.3e-93	350.1	34.6	A0A1D5XF64_WHEAT	Uncharacterized protein	SubName: Full=Uncharacterized protein {ECO:0000313|EnsemblPlants:TRIAE_CS42_4BL_TGACv1_320254_AA1032580.1};
TRINITY_DN49828_c0_g1_i6	tr|A0A1D5XF64|A0A1D5XF64_WHEAT	235	7.1e-93	350.5	34.7	A0A1D5XF64_WHEAT	Uncharacterized protein	SubName: Full=Uncharacterized protein {ECO:0000313|EnsemblPlants:TRIAE_CS42_4BL_TGACv1_320254_AA1032580.1};
TRINITY_DN49893_c0_g1_i4	tr|M8A9Q8|M8A9Q8_TRIUA	38	2.8e-13	84	25.2	M8A9Q8_TRIUA	Mitochondrial pyruvate carrier	RecName: Full=Mitochondrial pyruvate carrier {ECO:0000256|RuleBase:RU363100};
TRINITY_DN49893_c0_g1_i2	tr|M8A9Q8|M8A9Q8_TRIUA	24	0.00042	53.9	11.7	M8A9Q8_TRIUA	Mitochondrial pyruvate carrier	RecName: Full=Mitochondrial pyruvate carrier {ECO:0000256|RuleBase:RU363100};
TRINITY_DN49893_c0_g1_i5	tr|M8A9Q8|M8A9Q8_TRIUA	31	3.5e-09	71.6	8.3	M8A9Q8_TRIUA	Mitochondrial pyruvate carrier	RecName: Full=Mitochondrial pyruvate carrier {ECO:0000256|RuleBase:RU363100};
TRINITY_DN49832_c0_g1_i3	tr|A0A1D5VPP5|A0A1D5VPP5_WHEAT	128	3.4e-66	260	69.6	A0A1D5VPP5_WHEAT	Uncharacterized protein	SubName: Full=Uncharacterized protein {ECO:0000313|EnsemblPlants:TRIAE_CS42_3B_TGACv1_220768_AA0718660.1};
TRINITY_DN49832_c0_g1_i5	tr|A0A287PFI3|A0A287PFI3_HORVV	83	1e-41	177.6	99.2	A0A287PFI3_HORVV	Uncharacterized protein	SubName: Full=Uncharacterized protein {ECO:0000313|EnsemblPlants:HORVU4Hr1G066880.1};
TRINITY_DN49832_c0_g1_i1	tr|A0A1D5VPP5|A0A1D5VPP5_WHEAT	128	3.5e-66	260	68.3	A0A1D5VPP5_WHEAT	Uncharacterized protein	SubName: Full=Uncharacterized protein {ECO:0000313|EnsemblPlants:TRIAE_CS42_3B_TGACv1_220768_AA0718660.1};
TRINITY_DN49832_c0_g1_i6	tr|A0A1D5VPP5|A0A1D5VPP5_WHEAT	140	6.9e-73	282.3	71.6	A0A1D5VPP5_WHEAT	Uncharacterized protein	SubName: Full=Uncharacterized protein {ECO:0000313|EnsemblPlants:TRIAE_CS42_3B_TGACv1_220768_AA0718660.1};
TRINITY_DN49832_c0_g1_i2	tr|A0A1D5VPP5|A0A1D5VPP5_WHEAT	128	6.1e-65	255.4	96.2	A0A1D5VPP5_WHEAT	Uncharacterized protein	SubName: Full=Uncharacterized protein {ECO:0000313|EnsemblPlants:TRIAE_CS42_3B_TGACv1_220768_AA0718660.1};
TRINITY_DN49832_c0_g2_i3	tr|A0A1D5VPP6|A0A1D5VPP6_WHEAT	54	1.3e-19	104.4	52.9	A0A1D5VPP6_WHEAT	Uncharacterized protein	SubName: Full=Uncharacterized protein {ECO:0000313|EnsemblPlants:TRIAE_CS42_3B_TGACv1_220768_AA0718700.1};
TRINITY_DN49832_c0_g2_i2	tr|A0A1D5Y3D6|A0A1D5Y3D6_WHEAT	50	1e-16	94.7	51	A0A1D5Y3D6_WHEAT	Uncharacterized protein	SubName: Full=Uncharacterized protein {ECO:0000313|EnsemblPlants:TRIAE_CS42_4DL_TGACv1_344666_AA1148820.1};
TRINITY_DN49832_c0_g2_i1	tr|W5DZQ8|W5DZQ8_WHEAT	36	9e-09	68.2	41.9	W5DZQ8_WHEAT	Uncharacterized protein	SubName: Full=Uncharacterized protein {ECO:0000313|EnsemblPlants:TRIAE_CS42_4AS_TGACv1_309066_AA1030270.1};
TRINITY_DN49832_c0_g3_i1	tr|A0A1D5XD11|A0A1D5XD11_WHEAT	31	0.00011	55.8	15.6	A0A1D5XD11_WHEAT	Uncharacterized protein	SubName: Full=Uncharacterized protein {ECO:0000313|EnsemblPlants:TRIAE_CS42_4AS_TGACv1_307536_AA1021250.1};
TRINITY_DN49878_c0_g1_i7	tr|A0A1D5X1Q1|A0A1D5X1Q1_WHEAT	43	2.3e-14	87.8	23.8	A0A1D5X1Q1_WHEAT	Uncharacterized protein	SubName: Full=Uncharacterized protein {ECO:0000313|EnsemblPlants:TRIAE_CS42_4AL_TGACv1_288892_AA0960720.1};
TRINITY_DN49878_c0_g1_i5	tr|A0A1D5VSP9|A0A1D5VSP9_WHEAT	48	4.3e-18	99	61.5	A0A1D5VSP9_WHEAT	Uncharacterized protein	SubName: Full=Uncharacterized protein {ECO:0000313|EnsemblPlants:TRIAE_CS42_3B_TGACv1_221220_AA0734100.1};
TRINITY_DN49878_c0_g1_i3	tr|A0A1D5S5C2|A0A1D5S5C2_WHEAT	92	9.8e-17	96.7	22.4	A0A1D5S5C2_WHEAT	ATP-dependent DNA helicase	RecName: Full=ATP-dependent DNA helicase {ECO:0000256|RuleBase:RU363044}; EC=3.6.4.12 {ECO:0000256|RuleBase:RU363044};
TRINITY_DN49878_c0_g1_i6	tr|A0A1D5X1Q1|A0A1D5X1Q1_WHEAT	43	1.7e-14	87.8	32.7	A0A1D5X1Q1_WHEAT	Uncharacterized protein	SubName: Full=Uncharacterized protein {ECO:0000313|EnsemblPlants:TRIAE_CS42_4AL_TGACv1_288892_AA0960720.1};
TRINITY_DN49878_c0_g1_i2	tr|A0A1D5VSP9|A0A1D5VSP9_WHEAT	48	2.9e-18	99.4	70.6	A0A1D5VSP9_WHEAT	Uncharacterized protein	SubName: Full=Uncharacterized protein {ECO:0000313|EnsemblPlants:TRIAE_CS42_3B_TGACv1_221220_AA0734100.1};
TRINITY_DN49878_c0_g1_i4	tr|A0A1D5VSP9|A0A1D5VSP9_WHEAT	69	6.1e-18	99	62.3	A0A1D5VSP9_WHEAT	Uncharacterized protein	SubName: Full=Uncharacterized protein {ECO:0000313|EnsemblPlants:TRIAE_CS42_3B_TGACv1_221220_AA0734100.1};
TRINITY_DN49878_c0_g2_i2	tr|A0A1D5U594|A0A1D5U594_WHEAT	85	2.3e-20	109	19.3	A0A1D5U594_WHEAT	Uncharacterized protein	SubName: Full=Uncharacterized protein {ECO:0000313|EnsemblPlants:TRIAE_CS42_2BL_TGACv1_132558_AA0438400.1};
TRINITY_DN49878_c0_g2_i1	tr|A0A1D5U594|A0A1D5U594_WHEAT	82	1.3e-18	103.2	18.6	A0A1D5U594_WHEAT	Uncharacterized protein	SubName: Full=Uncharacterized protein {ECO:0000313|EnsemblPlants:TRIAE_CS42_2BL_TGACv1_132558_AA0438400.1};
TRINITY_DN49878_c1_g1_i1	tr|W5C334|W5C334_WHEAT	31	1.6e-08	68.2	20.6	W5C334_WHEAT	Elongator complex protein 1	RecName: Full=Elongator complex protein 1 {ECO:0000256|PIRNR:PIRNR017233};
TRINITY_DN49873_c0_g1_i2	tr|A0A1D5UE22|A0A1D5UE22_WHEAT	117	1.3e-55	224.2	99.4	A0A1D5UE22_WHEAT	Uncharacterized protein	SubName: Full=Uncharacterized protein {ECO:0000313|EnsemblPlants:TRIAE_CS42_2BS_TGACv1_147730_AA0487070.1};
TRINITY_DN49885_c0_g1_i4	tr|M8AUG2|M8AUG2_TRIUA	90	2.4e-19	103.6	82.3	M8AUG2_TRIUA	Putative mitochondrial chaperone bcs1	SubName: Full=Putative mitochondrial chaperone bcs1 {ECO:0000313|EMBL:EMS68880.1, ECO:0000313|EnsemblPlants:TRIUR3_12526-P1};
TRINITY_DN49885_c0_g1_i11	tr|M8AUG2|M8AUG2_TRIUA	125	9.6e-41	175.6	60.4	M8AUG2_TRIUA	Putative mitochondrial chaperone bcs1	SubName: Full=Putative mitochondrial chaperone bcs1 {ECO:0000313|EMBL:EMS68880.1, ECO:0000313|EnsemblPlants:TRIUR3_12526-P1};
TRINITY_DN49885_c0_g1_i5	tr|M8AUG2|M8AUG2_TRIUA	90	3.8e-19	103.6	52.5	M8AUG2_TRIUA	Putative mitochondrial chaperone bcs1	SubName: Full=Putative mitochondrial chaperone bcs1 {ECO:0000313|EMBL:EMS68880.1, ECO:0000313|EnsemblPlants:TRIUR3_12526-P1};
TRINITY_DN49885_c0_g1_i2	tr|M8AUG2|M8AUG2_TRIUA	125	7.2e-41	176	61.9	M8AUG2_TRIUA	Putative mitochondrial chaperone bcs1	SubName: Full=Putative mitochondrial chaperone bcs1 {ECO:0000313|EMBL:EMS68880.1, ECO:0000313|EnsemblPlants:TRIUR3_12526-P1};
TRINITY_DN49885_c0_g1_i7	tr|M8AUG2|M8AUG2_TRIUA	125	2.5e-41	177.6	60.5	M8AUG2_TRIUA	Putative mitochondrial chaperone bcs1	SubName: Full=Putative mitochondrial chaperone bcs1 {ECO:0000313|EMBL:EMS68880.1, ECO:0000313|EnsemblPlants:TRIUR3_12526-P1};
TRINITY_DN49885_c0_g1_i8	tr|M8AUG2|M8AUG2_TRIUA	95	3.4e-17	96.3	98.6	M8AUG2_TRIUA	Putative mitochondrial chaperone bcs1	SubName: Full=Putative mitochondrial chaperone bcs1 {ECO:0000313|EMBL:EMS68880.1, ECO:0000313|EnsemblPlants:TRIUR3_12526-P1};
TRINITY_DN49885_c0_g1_i10	tr|M8AUG2|M8AUG2_TRIUA	125	1.2e-40	175.3	60.5	M8AUG2_TRIUA	Putative mitochondrial chaperone bcs1	SubName: Full=Putative mitochondrial chaperone bcs1 {ECO:0000313|EMBL:EMS68880.1, ECO:0000313|EnsemblPlants:TRIUR3_12526-P1};
TRINITY_DN49885_c0_g2_i1	tr|M8CDX5|M8CDX5_AEGTA	120	7.2e-44	185.7	74.8	M8CDX5_AEGTA	Putative mitochondrial chaperone bcs1	SubName: Full=Putative mitochondrial chaperone bcs1 {ECO:0000313|EMBL:EMT21356.1, ECO:0000313|EnsemblPlants:EMT21356};
TRINITY_DN49882_c2_g1_i1	tr|W4ZTN5|W4ZTN5_WHEAT	141	5.7e-40	172.6	97.7	W4ZTN5_WHEAT	Uncharacterized protein	SubName: Full=Uncharacterized protein {ECO:0000313|EnsemblPlants:TRIAE_CS42_1AL_TGACv1_000024_AA0000690.1};
TRINITY_DN49882_c3_g1_i1	tr|A0A1D6KUX1|A0A1D6KUX1_MAIZE	43	0.00025	53.1	59.2	A0A1D6KUX1_MAIZE	Protein NETWORKED 1A	SubName: Full=Protein NETWORKED 1A {ECO:0000313|EMBL:ONM06357.1};
TRINITY_DN49847_c0_g1_i1	tr|A0A1D5SQW2|A0A1D5SQW2_WHEAT	51	5.5e-14	86.3	34.1	A0A1D5SQW2_WHEAT	Uncharacterized protein	SubName: Full=Uncharacterized protein {ECO:0000313|EnsemblPlants:TRIAE_CS42_1DL_TGACv1_061236_AA0189500.1};
TRINITY_DN49834_c0_g1_i1	tr|N1R2Q5|N1R2Q5_AEGTA	36	5.5e-10	72.4	36.4	N1R2Q5_AEGTA	GDSL esterase/lipase	SubName: Full=GDSL esterase/lipase {ECO:0000313|EMBL:EMT13774.1, ECO:0000313|EnsemblPlants:EMT13774};
TRINITY_DN49833_c0_g1_i1	tr|B3RLS6|B3RLS6_TRIAD	393	4.8e-127	463.4	91.3	B3RLS6_TRIAD	Uncharacterized protein	SubName: Full=Uncharacterized protein {ECO:0000313|EMBL:EDV29577.1};
TRINITY_DN49833_c0_g1_i4	tr|B3RLS6|B3RLS6_TRIAD	393	4.8e-127	463.4	91.3	B3RLS6_TRIAD	Uncharacterized protein	SubName: Full=Uncharacterized protein {ECO:0000313|EMBL:EDV29577.1};
TRINITY_DN49822_c0_g1_i1	tr|N1R5G5|N1R5G5_AEGTA	137	7.6e-26	127.1	33.4	N1R5G5_AEGTA	Uncharacterized protein	SubName: Full=Uncharacterized protein {ECO:0000313|EMBL:EMT33697.1, ECO:0000313|EnsemblPlants:EMT33697};
TRINITY_DN49826_c0_g1_i1	tr|R7WCL5|R7WCL5_AEGTA	37	4e-05	58.2	9.9	R7WCL5_AEGTA	Autoimmune regulator	SubName: Full=Autoimmune regulator {ECO:0000313|EMBL:EMT20462.1, ECO:0000313|EnsemblPlants:EMT20462};
TRINITY_DN49856_c0_g2_i3	tr|A0A1D6C6L3|A0A1D6C6L3_WHEAT	128	2.5e-12	80.5	82	A0A1D6C6L3_WHEAT	Uncharacterized protein	SubName: Full=Uncharacterized protein {ECO:0000313|EnsemblPlants:TRIAE_CS42_7BL_TGACv1_577720_AA1881790.1};
TRINITY_DN49856_c0_g2_i5	tr|A0A1D6C6L3|A0A1D6C6L3_WHEAT	58	4e-07	62.4	83.7	A0A1D6C6L3_WHEAT	Uncharacterized protein	SubName: Full=Uncharacterized protein {ECO:0000313|EnsemblPlants:TRIAE_CS42_7BL_TGACv1_577720_AA1881790.1};
TRINITY_DN49856_c0_g2_i1	tr|A0A1D6C6L3|A0A1D6C6L3_WHEAT	136	1.8e-22	114.4	75	A0A1D6C6L3_WHEAT	Uncharacterized protein	SubName: Full=Uncharacterized protein {ECO:0000313|EnsemblPlants:TRIAE_CS42_7BL_TGACv1_577720_AA1881790.1};
TRINITY_DN49856_c0_g2_i2	tr|A0A1D6C6L3|A0A1D6C6L3_WHEAT	128	9.4e-12	78.6	82	A0A1D6C6L3_WHEAT	Uncharacterized protein	SubName: Full=Uncharacterized protein {ECO:0000313|EnsemblPlants:TRIAE_CS42_7BL_TGACv1_577720_AA1881790.1};
TRINITY_DN49856_c0_g2_i4	tr|A0A1D6C6L3|A0A1D6C6L3_WHEAT	136	1.4e-22	114.8	75.2	A0A1D6C6L3_WHEAT	Uncharacterized protein	SubName: Full=Uncharacterized protein {ECO:0000313|EnsemblPlants:TRIAE_CS42_7BL_TGACv1_577720_AA1881790.1};
TRINITY_DN49848_c0_g1_i1	tr|A0A1D5V5U2|A0A1D5V5U2_WHEAT	505	8.7e-225	789.6	39.6	A0A1D5V5U2_WHEAT	Uncharacterized protein	SubName: Full=Uncharacterized protein {ECO:0000313|EnsemblPlants:TRIAE_CS42_3AL_TGACv1_193938_AA0622990.1};
TRINITY_DN49848_c0_g2_i1	tr|A0A1D6B9Q3|A0A1D6B9Q3_WHEAT	390	3.2e-194	688	33.6	A0A1D6B9Q3_WHEAT	Uncharacterized protein	SubName: Full=Uncharacterized protein {ECO:0000313|EnsemblPlants:TRIAE_CS42_6DL_TGACv1_528163_AA1712140.1};
TRINITY_DN49848_c0_g2_i7	tr|M7YZ91|M7YZ91_TRIUA	82	5e-19	105.1	12.7	M7YZ91_TRIUA	Heat shock cognate 70 kDa protein 1	SubName: Full=Heat shock cognate 70 kDa protein 1 {ECO:0000313|EMBL:EMS45385.1, ECO:0000313|EnsemblPlants:TRIUR3_20929-P1};
TRINITY_DN49848_c0_g2_i3	tr|A0A1D6B9Q3|A0A1D6B9Q3_WHEAT	390	5e-194	688	21.7	A0A1D6B9Q3_WHEAT	Uncharacterized protein	SubName: Full=Uncharacterized protein {ECO:0000313|EnsemblPlants:TRIAE_CS42_6DL_TGACv1_528163_AA1712140.1};
TRINITY_DN49848_c0_g2_i5	tr|M7YZ91|M7YZ91_TRIUA	82	4.8e-19	105.1	13.2	M7YZ91_TRIUA	Heat shock cognate 70 kDa protein 1	SubName: Full=Heat shock cognate 70 kDa protein 1 {ECO:0000313|EMBL:EMS45385.1, ECO:0000313|EnsemblPlants:TRIUR3_20929-P1};
TRINITY_DN49848_c0_g3_i1	tr|A0A1D5TU24|A0A1D5TU24_WHEAT	40	8.9e-15	88.6	33.5	A0A1D5TU24_WHEAT	Uncharacterized protein	SubName: Full=Uncharacterized protein {ECO:0000313|EnsemblPlants:TRIAE_CS42_2BL_TGACv1_129439_AA0383730.1};
TRINITY_DN49848_c1_g1_i1	tr|M7YRI0|M7YRI0_TRIUA	67	4e-20	106.7	44.5	M7YRI0_TRIUA	Uncharacterized protein	SubName: Full=Uncharacterized protein {ECO:0000313|EMBL:EMS49636.1, ECO:0000313|EnsemblPlants:TRIUR3_16324-P1};
TRINITY_DN49848_c2_g1_i1	tr|A0A1D5Y876|A0A1D5Y876_WHEAT	219	4.8e-90	340.5	49.9	A0A1D5Y876_WHEAT	Uncharacterized protein	SubName: Full=Uncharacterized protein {ECO:0000313|EnsemblPlants:TRIAE_CS42_4DS_TGACv1_361865_AA1173740.1};
TRINITY_DN49848_c2_g2_i1	tr|A0A1D5S809|A0A1D5S809_WHEAT	172	2.1e-87	331.3	53.7	A0A1D5S809_WHEAT	Uncharacterized protein	SubName: Full=Uncharacterized protein {ECO:0000313|EnsemblPlants:TRIAE_CS42_1BL_TGACv1_030627_AA0096270.1};
TRINITY_DN49872_c0_g1_i2	tr|A0A1D5W7G4|A0A1D5W7G4_WHEAT	67	0.00022	53.5	82.7	A0A1D5W7G4_WHEAT	Uncharacterized protein	SubName: Full=Uncharacterized protein {ECO:0000313|EnsemblPlants:TRIAE_CS42_3B_TGACv1_225212_AA0806160.1};
TRINITY_DN49872_c0_g1_i1	tr|A0A1D5W7G4|A0A1D5W7G4_WHEAT	42	1.1e-13	84.7	42	A0A1D5W7G4_WHEAT	Uncharacterized protein	SubName: Full=Uncharacterized protein {ECO:0000313|EnsemblPlants:TRIAE_CS42_3B_TGACv1_225212_AA0806160.1};
TRINITY_DN49853_c0_g1_i1	tr|W5DN82|W5DN82_WHEAT	119	2.9e-64	253.1	94.2	W5DN82_WHEAT	Uncharacterized protein	SubName: Full=Uncharacterized protein {ECO:0000313|EnsemblPlants:TRIAE_CS42_4AL_TGACv1_289623_AA0974220.1};
TRINITY_DN49853_c1_g1_i1	tr|W5ENW9|W5ENW9_WHEAT	74	1.4e-34	153.7	98.7	W5ENW9_WHEAT	Uncharacterized protein	SubName: Full=Uncharacterized protein {ECO:0000313|EnsemblPlants:TRIAE_CS42_4DS_TGACv1_361391_AA1166860.4};
TRINITY_DN49803_c0_g1_i3	tr|A0A1D5Y0A8|A0A1D5Y0A8_WHEAT	182	2e-65	258.1	63.9	A0A1D5Y0A8_WHEAT	Uncharacterized protein	SubName: Full=Uncharacterized protein {ECO:0000313|EnsemblPlants:TRIAE_CS42_4DL_TGACv1_343482_AA1135070.1};
TRINITY_DN49803_c0_g1_i1	tr|A0A1D5Y0A8|A0A1D5Y0A8_WHEAT	182	2e-65	258.1	64.2	A0A1D5Y0A8_WHEAT	Uncharacterized protein	SubName: Full=Uncharacterized protein {ECO:0000313|EnsemblPlants:TRIAE_CS42_4DL_TGACv1_343482_AA1135070.1};
TRINITY_DN49803_c0_g1_i5	tr|A0A1D5Y0A8|A0A1D5Y0A8_WHEAT	181	2.5e-65	257.7	67	A0A1D5Y0A8_WHEAT	Uncharacterized protein	SubName: Full=Uncharacterized protein {ECO:0000313|EnsemblPlants:TRIAE_CS42_4DL_TGACv1_343482_AA1135070.1};
TRINITY_DN49803_c0_g1_i6	tr|A0A1D5XAE2|A0A1D5XAE2_WHEAT	213	2.2e-64	254.6	74.6	A0A1D5XAE2_WHEAT	Uncharacterized protein	SubName: Full=Uncharacterized protein {ECO:0000313|EnsemblPlants:TRIAE_CS42_4AS_TGACv1_306439_AA1008170.1};
TRINITY_DN49800_c0_g1_i1	tr|M8ASS1|M8ASS1_AEGTA	57	2.7e-23	116.7	53.3	M8ASS1_AEGTA	Hydroxyisourate hydrolase	SubName: Full=Hydroxyisourate hydrolase {ECO:0000313|EMBL:EMT07547.1, ECO:0000313|EnsemblPlants:EMT07547};
TRINITY_DN49800_c1_g1_i1	tr|A0A1D5V6W5|A0A1D5V6W5_WHEAT	32	1.4e-07	65.1	19.8	A0A1D5V6W5_WHEAT	Uncharacterized protein	SubName: Full=Uncharacterized protein {ECO:0000313|EnsemblPlants:TRIAE_CS42_3AL_TGACv1_194185_AA0628080.3};
TRINITY_DN49865_c0_g1_i1	tr|A0A1D5SXY3|A0A1D5SXY3_WHEAT	70	2.2e-24	119.8	97.2	A0A1D5SXY3_WHEAT	PRA1 family protein	RecName: Full=PRA1 family protein {ECO:0000256|RuleBase:RU363107};
TRINITY_DN49865_c0_g2_i10	tr|A0A1D5YJR4|A0A1D5YJR4_WHEAT	174	1.6e-81	311.2	76.3	A0A1D5YJR4_WHEAT	PRA1 family protein	RecName: Full=PRA1 family protein {ECO:0000256|RuleBase:RU363107};
TRINITY_DN49865_c0_g2_i4	tr|A0A1D5YJR4|A0A1D5YJR4_WHEAT	114	8.5e-31	141.7	98.8	A0A1D5YJR4_WHEAT	PRA1 family protein	RecName: Full=PRA1 family protein {ECO:0000256|RuleBase:RU363107};
TRINITY_DN49865_c0_g2_i5	tr|F2EHE3|F2EHE3_HORVV	171	1.9e-58	235	57.3	F2EHE3_HORVV	PRA1 family protein	RecName: Full=PRA1 family protein {ECO:0000256|RuleBase:RU363107};
TRINITY_DN49865_c0_g2_i9	tr|A0A1D5YJR4|A0A1D5YJR4_WHEAT	176	9e-72	278.9	76.3	A0A1D5YJR4_WHEAT	PRA1 family protein	RecName: Full=PRA1 family protein {ECO:0000256|RuleBase:RU363107};
TRINITY_DN49865_c0_g2_i11	tr|A0A1D5YJR4|A0A1D5YJR4_WHEAT	128	2.5e-55	223.4	99.2	A0A1D5YJR4_WHEAT	PRA1 family protein	RecName: Full=PRA1 family protein {ECO:0000256|RuleBase:RU363107};
TRINITY_DN49865_c0_g2_i3	tr|A0A1D5YJR4|A0A1D5YJR4_WHEAT	176	6.4e-70	272.7	76.3	A0A1D5YJR4_WHEAT	PRA1 family protein	RecName: Full=PRA1 family protein {ECO:0000256|RuleBase:RU363107};
TRINITY_DN49865_c0_g2_i7	tr|F2EHE3|F2EHE3_HORVV	99	2.2e-22	113.6	99	F2EHE3_HORVV	PRA1 family protein	RecName: Full=PRA1 family protein {ECO:0000256|RuleBase:RU363107};
TRINITY_DN49865_c0_g2_i2	tr|A0A1D5YJR4|A0A1D5YJR4_WHEAT	174	1.5e-81	311.6	61.9	A0A1D5YJR4_WHEAT	PRA1 family protein	RecName: Full=PRA1 family protein {ECO:0000256|RuleBase:RU363107};
TRINITY_DN49865_c0_g2_i1	tr|A0A1D5YJR4|A0A1D5YJR4_WHEAT	176	1.7e-69	271.6	63.4	A0A1D5YJR4_WHEAT	PRA1 family protein	RecName: Full=PRA1 family protein {ECO:0000256|RuleBase:RU363107};
TRINITY_DN49852_c1_g1_i17	tr|A0A1D6RYC3|A0A1D6RYC3_WHEAT	75	6.5e-30	140.6	19	A0A1D6RYC3_WHEAT	Uncharacterized protein	SubName: Full=Uncharacterized protein {ECO:0000313|EnsemblPlants:TRIAE_CS42_4BS_TGACv1_328586_AA1090560.1};
TRINITY_DN49852_c1_g1_i15	tr|A0A1D6RYC3|A0A1D6RYC3_WHEAT	75	8.6e-30	140.6	14.5	A0A1D6RYC3_WHEAT	Uncharacterized protein	SubName: Full=Uncharacterized protein {ECO:0000313|EnsemblPlants:TRIAE_CS42_4BS_TGACv1_328586_AA1090560.1};
TRINITY_DN49852_c1_g1_i4	tr|A0A1D5YPZ3|A0A1D5YPZ3_WHEAT	61	3.7e-21	111.7	13.5	A0A1D5YPZ3_WHEAT	Uncharacterized protein	SubName: Full=Uncharacterized protein {ECO:0000313|EnsemblPlants:TRIAE_CS42_5AL_TGACv1_377666_AA1248660.1};
TRINITY_DN49852_c1_g1_i21	tr|A0A1D5YPZ3|A0A1D5YPZ3_WHEAT	93	3e-28	134.8	28.3	A0A1D5YPZ3_WHEAT	Uncharacterized protein	SubName: Full=Uncharacterized protein {ECO:0000313|EnsemblPlants:TRIAE_CS42_5AL_TGACv1_377666_AA1248660.1};
TRINITY_DN49852_c1_g1_i8	tr|A0A1D6RYC3|A0A1D6RYC3_WHEAT	59	4.8e-23	117.5	18.2	A0A1D6RYC3_WHEAT	Uncharacterized protein	SubName: Full=Uncharacterized protein {ECO:0000313|EnsemblPlants:TRIAE_CS42_4BS_TGACv1_328586_AA1090560.1};
TRINITY_DN49852_c1_g1_i13	tr|A0A1D5YPZ3|A0A1D5YPZ3_WHEAT	79	2.5e-32	146.7	71.8	A0A1D5YPZ3_WHEAT	Uncharacterized protein	SubName: Full=Uncharacterized protein {ECO:0000313|EnsemblPlants:TRIAE_CS42_5AL_TGACv1_377666_AA1248660.1};
TRINITY_DN49819_c0_g1_i1	tr|M8BA72|M8BA72_AEGTA	34	2.1e-11	76.6	46.6	M8BA72_AEGTA	Uncharacterized protein	SubName: Full=Uncharacterized protein {ECO:0000313|EMBL:EMT10550.1, ECO:0000313|EnsemblPlants:EMT10550};
TRINITY_DN49819_c1_g1_i3	tr|A0A1D5ZXL3|A0A1D5ZXL3_WHEAT	418	7e-230	805.4	71.5	A0A1D5ZXL3_WHEAT	Uncharacterized protein	SubName: Full=Uncharacterized protein {ECO:0000313|EnsemblPlants:TRIAE_CS42_5DL_TGACv1_436105_AA1458070.3};
TRINITY_DN49819_c1_g1_i2	tr|A0A1D5ZXL1|A0A1D5ZXL1_WHEAT	80	5.3e-39	170.6	22.6	A0A1D5ZXL1_WHEAT	Uncharacterized protein	SubName: Full=Uncharacterized protein {ECO:0000313|EnsemblPlants:TRIAE_CS42_5DL_TGACv1_436105_AA1458070.1};
TRINITY_DN49819_c1_g1_i4	tr|A0A1D5ZXL1|A0A1D5ZXL1_WHEAT	85	2.1e-39	172.6	15.4	A0A1D5ZXL1_WHEAT	Uncharacterized protein	SubName: Full=Uncharacterized protein {ECO:0000313|EnsemblPlants:TRIAE_CS42_5DL_TGACv1_436105_AA1458070.1};
TRINITY_DN49812_c0_g1_i1	tr|R7W2L6|R7W2L6_AEGTA	40	2.6e-13	85.1	12.6	R7W2L6_AEGTA	Uncharacterized protein	SubName: Full=Uncharacterized protein {ECO:0000313|EMBL:EMT13621.1, ECO:0000313|EnsemblPlants:EMT13621};
TRINITY_DN49816_c0_g1_i6	tr|A0A022Q2G8|A0A022Q2G8_ERYGU	95	0.0004	55.8	11.5	A0A022Q2G8_ERYGU	Uncharacterized protein	SubName: Full=Uncharacterized protein {ECO:0000313|EMBL:EYU21348.1};
TRINITY_DN49861_c0_g1_i2	tr|A0A287UCS9|A0A287UCS9_HORVV	60	6.3e-13	82.4	50.8	A0A287UCS9_HORVV	Uncharacterized protein	SubName: Full=Uncharacterized protein {ECO:0000313|EnsemblPlants:HORVU6Hr1G060150.10};
TRINITY_DN49861_c0_g1_i1	tr|A0A287UCS9|A0A287UCS9_HORVV	58	3.3e-11	76.6	51.3	A0A287UCS9_HORVV	Uncharacterized protein	SubName: Full=Uncharacterized protein {ECO:0000313|EnsemblPlants:HORVU6Hr1G060150.10};
TRINITY_DN49831_c0_g1_i1	tr|A0A0Q3H160|A0A0Q3H160_BRADI	70	7.3e-33	147.9	99.5	A0A0Q3H160_BRADI	Uncharacterized protein	SubName: Full=Uncharacterized protein {ECO:0000313|EMBL:KQK16712.1};
TRINITY_DN49871_c0_g1_i1	tr|A0A287LU00|A0A287LU00_HORVV	100	1.5e-17	97.4	99.7	A0A287LU00_HORVV	Uncharacterized protein	SubName: Full=Uncharacterized protein {ECO:0000313|EnsemblPlants:HORVU3Hr1G078960.15};
TRINITY_DN49871_c0_g1_i3	tr|A0A287LU00|A0A287LU00_HORVV	30	1.9e-08	67.4	27.9	A0A287LU00_HORVV	Uncharacterized protein	SubName: Full=Uncharacterized protein {ECO:0000313|EnsemblPlants:HORVU3Hr1G078960.15};
TRINITY_DN49871_c0_g2_i1	tr|A0A1D6RT47|A0A1D6RT47_WHEAT	50	1.5e-21	110.9	46.9	A0A1D6RT47_WHEAT	Uncharacterized protein	SubName: Full=Uncharacterized protein {ECO:0000313|EnsemblPlants:TRIAE_CS42_3DL_TGACv1_252993_AA0892880.3};
TRINITY_DN49898_c0_g1_i1	tr|M7YGZ8|M7YGZ8_TRIUA	97	8.6e-12	78.6	85.3	M7YGZ8_TRIUA	Uncharacterized protein	SubName: Full=Uncharacterized protein {ECO:0000313|EMBL:EMS46457.1, ECO:0000313|EnsemblPlants:TRIUR3_26457-P1};
TRINITY_DN49836_c0_g1_i2	tr|A0A0A9C1S9|A0A0A9C1S9_ARUDO	145	5.8e-45	189.1	99.8	A0A0A9C1S9_ARUDO	Uncharacterized protein	SubName: Full=Uncharacterized protein {ECO:0000313|EMBL:JAD67355.1};
TRINITY_DN49836_c0_g1_i4	tr|A0A1D5UES6|A0A1D5UES6_WHEAT	127	1.2e-28	134.8	99.7	A0A1D5UES6_WHEAT	Uncharacterized protein	SubName: Full=Uncharacterized protein {ECO:0000313|EnsemblPlants:TRIAE_CS42_2BS_TGACv1_148264_AA0491750.1};
TRINITY_DN49836_c0_g1_i1	tr|A0A287HUB4|A0A287HUB4_HORVV	40	1.5e-11	77	59.7	A0A287HUB4_HORVV	Uncharacterized protein	SubName: Full=Uncharacterized protein {ECO:0000313|EnsemblPlants:HORVU2Hr1G044270.4};
TRINITY_DN49836_c0_g1_i3	tr|M8BXZ7|M8BXZ7_AEGTA	127	6.5e-24	119	99.7	M8BXZ7_AEGTA	Cysteine-rich receptor-like protein kinase 10	SubName: Full=Cysteine-rich receptor-like protein kinase 10 {ECO:0000313|EMBL:EMT07813.1, ECO:0000313|EnsemblPlants:EMT07813};
TRINITY_DN49869_c0_g1_i5	tr|A0A1D5USX2|A0A1D5USX2_WHEAT	316	1.5e-171	612.1	41.8	A0A1D5USX2_WHEAT	Pectinesterase	RecName: Full=Pectinesterase {ECO:0000256|RuleBase:RU000589}; EC=3.1.1.11 {ECO:0000256|RuleBase:RU000589};
TRINITY_DN49869_c0_g1_i2	tr|M7YV42|M7YV42_TRIUA	274	1.5e-148	534.3	96.3	M7YV42_TRIUA	Pectinesterase	RecName: Full=Pectinesterase {ECO:0000256|RuleBase:RU000589}; EC=3.1.1.11 {ECO:0000256|RuleBase:RU000589};
TRINITY_DN49869_c0_g1_i7	tr|A0A1D6AHF3|A0A1D6AHF3_WHEAT	61	4.8e-13	83.2	39.1	A0A1D6AHF3_WHEAT	Uncharacterized protein	SubName: Full=Uncharacterized protein {ECO:0000313|EnsemblPlants:TRIAE_CS42_6AS_TGACv1_486519_AA1562140.2};
TRINITY_DN49869_c0_g1_i4	tr|A0A1D5USX2|A0A1D5USX2_WHEAT	374	4.8e-215	755.7	84.2	A0A1D5USX2_WHEAT	Pectinesterase	RecName: Full=Pectinesterase {ECO:0000256|RuleBase:RU000589}; EC=3.1.1.11 {ECO:0000256|RuleBase:RU000589};
TRINITY_DN49869_c0_g1_i8	tr|M7YV42|M7YV42_TRIUA	316	1.2e-170	609	42.4	M7YV42_TRIUA	Pectinesterase	RecName: Full=Pectinesterase {ECO:0000256|RuleBase:RU000589}; EC=3.1.1.11 {ECO:0000256|RuleBase:RU000589};
TRINITY_DN49869_c0_g1_i6	tr|M7YV42|M7YV42_TRIUA	295	1.6e-161	577.4	96.5	M7YV42_TRIUA	Pectinesterase	RecName: Full=Pectinesterase {ECO:0000256|RuleBase:RU000589}; EC=3.1.1.11 {ECO:0000256|RuleBase:RU000589};
TRINITY_DN49869_c0_g1_i1	tr|A0A1D5USX2|A0A1D5USX2_WHEAT	316	1.5e-171	612.1	40.6	A0A1D5USX2_WHEAT	Pectinesterase	RecName: Full=Pectinesterase {ECO:0000256|RuleBase:RU000589}; EC=3.1.1.11 {ECO:0000256|RuleBase:RU000589};
TRINITY_DN49888_c0_g1_i4	tr|A0A1D6AS37|A0A1D6AS37_WHEAT	109	3.7e-53	217.2	40.7	A0A1D6AS37_WHEAT	Uncharacterized protein	SubName: Full=Uncharacterized protein {ECO:0000313|EnsemblPlants:TRIAE_CS42_6BL_TGACv1_501341_AA1616220.1};
TRINITY_DN49888_c0_g1_i2	tr|M8CX55|M8CX55_AEGTA	180	2.2e-53	218	61.9	M8CX55_AEGTA	Uncharacterized protein	SubName: Full=Uncharacterized protein {ECO:0000313|EMBL:EMT28381.1, ECO:0000313|EnsemblPlants:EMT28381};
TRINITY_DN49809_c0_g1_i1	tr|W5BI16|W5BI16_WHEAT	84	5.5e-35	155.2	98.8	W5BI16_WHEAT	Uncharacterized protein	SubName: Full=Uncharacterized protein {ECO:0000313|EnsemblPlants:TRIAE_CS42_2BS_TGACv1_146868_AA0474300.1};
TRINITY_DN49809_c0_g2_i1	tr|A0A0Q3E5S0|A0A0Q3E5S0_BRADI	108	3e-35	157.5	45.7	A0A0Q3E5S0_BRADI	Uncharacterized protein	SubName: Full=Uncharacterized protein {ECO:0000313|EMBL:KQJ81548.1};
TRINITY_DN49849_c0_g1_i1	tr|M7ZID7|M7ZID7_TRIUA	78	1e-28	135.2	53.4	M7ZID7_TRIUA	Uncharacterized protein	SubName: Full=Uncharacterized protein {ECO:0000313|EMBL:EMS52120.1, ECO:0000313|EnsemblPlants:TRIUR3_06415-P1};
TRINITY_DN49870_c0_g1_i4	tr|R1FKI6|R1FKI6_EMIHU	254	6.1e-75	289.7	92	R1FKI6_EMIHU	Putative enoyl-CoA hydratase/isomerase	SubName: Full=Putative enoyl-CoA hydratase/isomerase {ECO:0000313|EMBL:EOD36101.1}; Flags: Fragment;
TRINITY_DN49870_c0_g1_i3	tr|R1FKI6|R1FKI6_EMIHU	254	2.3e-75	291.2	84.8	R1FKI6_EMIHU	Putative enoyl-CoA hydratase/isomerase	SubName: Full=Putative enoyl-CoA hydratase/isomerase {ECO:0000313|EMBL:EOD36101.1}; Flags: Fragment;
TRINITY_DN49870_c0_g1_i2	tr|R1FKI6|R1FKI6_EMIHU	254	4.7e-75	290	92	R1FKI6_EMIHU	Putative enoyl-CoA hydratase/isomerase	SubName: Full=Putative enoyl-CoA hydratase/isomerase {ECO:0000313|EMBL:EOD36101.1}; Flags: Fragment;
TRINITY_DN49813_c0_g1_i1	tr|A0A1D5UFI3|A0A1D5UFI3_WHEAT	187	2.3e-100	373.6	96.2	A0A1D5UFI3_WHEAT	Uncharacterized protein	SubName: Full=Uncharacterized protein {ECO:0000313|EnsemblPlants:TRIAE_CS42_2BS_TGACv1_148867_AA0495440.1};
TRINITY_DN49813_c0_g1_i2	tr|N1QS23|N1QS23_AEGTA	156	4.8e-80	305.8	95.5	N1QS23_AEGTA	Cytochrome P450 86A2	SubName: Full=Cytochrome P450 86A2 {ECO:0000313|EMBL:EMT02243.1, ECO:0000313|EnsemblPlants:EMT02243};
TRINITY_DN49845_c0_g1_i1	tr|A0A1D6B854|A0A1D6B854_WHEAT	86	2.5e-43	183	98.9	A0A1D6B854_WHEAT	Uncharacterized protein	SubName: Full=Uncharacterized protein {ECO:0000313|EnsemblPlants:TRIAE_CS42_6DL_TGACv1_527528_AA1705290.1};
TRINITY_DN49874_c0_g1_i3	tr|T1NCD8|T1NCD8_TRIUA	44	2.3e-12	80.5	38	T1NCD8_TRIUA	Uncharacterized protein	SubName: Full=Uncharacterized protein {ECO:0000313|EnsemblPlants:TRIUR3_28198-P1};
TRINITY_DN49874_c0_g1_i1	tr|A0A1D6BS63|A0A1D6BS63_WHEAT	44	0.00013	54.7	39.4	A0A1D6BS63_WHEAT	Uncharacterized protein	SubName: Full=Uncharacterized protein {ECO:0000313|EnsemblPlants:TRIAE_CS42_7AS_TGACv1_569012_AA1804730.1};
TRINITY_DN49830_c0_g1_i2	tr|A0A1D5Z0P3|A0A1D5Z0P3_WHEAT	243	9.4e-64	252.3	99.7	A0A1D5Z0P3_WHEAT	Uncharacterized protein	SubName: Full=Uncharacterized protein {ECO:0000313|EnsemblPlants:TRIAE_CS42_5BL_TGACv1_404591_AA1305290.1};
TRINITY_DN49830_c0_g1_i1	tr|M8BSP4|M8BSP4_AEGTA	95	3e-30	141	39.6	M8BSP4_AEGTA	Uncharacterized protein	SubName: Full=Uncharacterized protein {ECO:0000313|EMBL:EMT24793.1, ECO:0000313|EnsemblPlants:EMT24793};
TRINITY_DN49830_c0_g2_i2	tr|A0A1D5Z0P3|A0A1D5Z0P3_WHEAT	252	1.5e-109	404.8	72.4	A0A1D5Z0P3_WHEAT	Uncharacterized protein	SubName: Full=Uncharacterized protein {ECO:0000313|EnsemblPlants:TRIAE_CS42_5BL_TGACv1_404591_AA1305290.1};
TRINITY_DN49830_c0_g2_i1	tr|A0A1D5Z0P3|A0A1D5Z0P3_WHEAT	252	3.3e-131	476.9	73.4	A0A1D5Z0P3_WHEAT	Uncharacterized protein	SubName: Full=Uncharacterized protein {ECO:0000313|EnsemblPlants:TRIAE_CS42_5BL_TGACv1_404591_AA1305290.1};
TRINITY_DN49830_c0_g4_i2	tr|M8C8F8|M8C8F8_AEGTA	178	1.5e-73	285	64.5	M8C8F8_AEGTA	Uncharacterized protein	SubName: Full=Uncharacterized protein {ECO:0000313|EMBL:EMT30358.1, ECO:0000313|EnsemblPlants:EMT30358};
TRINITY_DN49830_c0_g4_i1	tr|M8C8F8|M8C8F8_AEGTA	178	7.1e-73	283.1	51.4	M8C8F8_AEGTA	Uncharacterized protein	SubName: Full=Uncharacterized protein {ECO:0000313|EMBL:EMT30358.1, ECO:0000313|EnsemblPlants:EMT30358};
TRINITY_DN49830_c0_g5_i1	tr|A0A1D5ZSF0|A0A1D5ZSF0_WHEAT	69	8e-29	136	35.1	A0A1D5ZSF0_WHEAT	Uncharacterized protein	SubName: Full=Uncharacterized protein {ECO:0000313|EnsemblPlants:TRIAE_CS42_5DL_TGACv1_434466_AA1436450.1};
TRINITY_DN49851_c0_g1_i2	tr|A0A1D5TU94|A0A1D5TU94_WHEAT	29	1.2e-07	65.9	12.9	A0A1D5TU94_WHEAT	Uncharacterized protein	SubName: Full=Uncharacterized protein {ECO:0000313|EnsemblPlants:TRIAE_CS42_2BL_TGACv1_129459_AA0384800.1};
TRINITY_DN49851_c0_g1_i1	tr|A0A1D5TU94|A0A1D5TU94_WHEAT	29	1.2e-07	65.9	13	A0A1D5TU94_WHEAT	Uncharacterized protein	SubName: Full=Uncharacterized protein {ECO:0000313|EnsemblPlants:TRIAE_CS42_2BL_TGACv1_129459_AA0384800.1};
TRINITY_DN49810_c0_g1_i1	tr|A0A287WNX2|A0A287WNX2_HORVV	65	2.5e-08	66.6	69.8	A0A287WNX2_HORVV	Uncharacterized protein	SubName: Full=Uncharacterized protein {ECO:0000313|EnsemblPlants:HORVU7Hr1G060970.4};
TRINITY_DN49806_c0_g1_i2	tr|A0A1D5WPQ2|A0A1D5WPQ2_WHEAT	194	5.5e-110	406	74.4	A0A1D5WPQ2_WHEAT	Uncharacterized protein	SubName: Full=Uncharacterized protein {ECO:0000313|EnsemblPlants:TRIAE_CS42_3DL_TGACv1_253391_AA0894360.1};
TRINITY_DN49806_c0_g1_i1	tr|M7YZQ4|M7YZQ4_TRIUA	194	1.8e-112	414.5	64	M7YZQ4_TRIUA	Uncharacterized protein	SubName: Full=Uncharacterized protein {ECO:0000313|EMBL:EMS45525.1, ECO:0000313|EnsemblPlants:TRIUR3_04730-P1};
TRINITY_DN49886_c0_g1_i1	tr|A0A1I8BC92|A0A1I8BC92_MELHA	111	2.1e-51	210.7	67.8	A0A1I8BC92_MELHA	Uncharacterized protein	SubName: Full=Uncharacterized protein {ECO:0000313|WBParaSite:MhA1_Contig180.frz3.gene8};
TRINITY_DN49886_c0_g2_i1	tr|A0A1I8BC92|A0A1I8BC92_MELHA	112	9.5e-48	198.4	78.9	A0A1I8BC92_MELHA	Uncharacterized protein	SubName: Full=Uncharacterized protein {ECO:0000313|WBParaSite:MhA1_Contig180.frz3.gene8};
TRINITY_DN49850_c0_g1_i4	tr|A0A1D5ZS38|A0A1D5ZS38_WHEAT	24	0.00073	52.4	19.5	A0A1D5ZS38_WHEAT	Uncharacterized protein	SubName: Full=Uncharacterized protein {ECO:0000313|EnsemblPlants:TRIAE_CS42_5DL_TGACv1_434385_AA1435090.3};
TRINITY_DN49850_c0_g4_i1	tr|A0A287K3D2|A0A287K3D2_HORVV	41	1.3e-06	61.6	31.6	A0A287K3D2_HORVV	Uncharacterized protein	SubName: Full=Uncharacterized protein {ECO:0000313|EnsemblPlants:HORVU3Hr1G011110.41};
TRINITY_DN49850_c1_g1_i1	tr|M7ZHI2|M7ZHI2_TRIUA	66	8.6e-09	68.2	78.6	M7ZHI2_TRIUA	Uncharacterized protein	SubName: Full=Uncharacterized protein {ECO:0000313|EMBL:EMS62673.1, ECO:0000313|EnsemblPlants:TRIUR3_28832-P1};
TRINITY_DN49850_c1_g1_i2	tr|M7ZHI2|M7ZHI2_TRIUA	61	6.4e-07	62	69.2	M7ZHI2_TRIUA	Uncharacterized protein	SubName: Full=Uncharacterized protein {ECO:0000313|EMBL:EMS62673.1, ECO:0000313|EnsemblPlants:TRIUR3_28832-P1};
TRINITY_DN49868_c0_g1_i2	tr|A0A1D6DAF4|A0A1D6DAF4_WHEAT	84	1.7e-15	91.7	43	A0A1D6DAF4_WHEAT	Uncharacterized protein	SubName: Full=Uncharacterized protein {ECO:0000313|EnsemblPlants:TRIAE_CS42_U_TGACv1_641263_AA2090050.1};
TRINITY_DN49868_c0_g1_i1	tr|A0A1D6DAF4|A0A1D6DAF4_WHEAT	84	1.6e-15	91.7	45.9	A0A1D6DAF4_WHEAT	Uncharacterized protein	SubName: Full=Uncharacterized protein {ECO:0000313|EnsemblPlants:TRIAE_CS42_U_TGACv1_641263_AA2090050.1};
TRINITY_DN49841_c0_g1_i2	tr|A0A1D6CB67|A0A1D6CB67_WHEAT	158	1.8e-79	304.3	74.4	A0A1D6CB67_WHEAT	Uncharacterized protein	SubName: Full=Uncharacterized protein {ECO:0000313|EnsemblPlants:TRIAE_CS42_7BL_TGACv1_579385_AA1906820.1};
TRINITY_DN49841_c0_g1_i3	tr|A0A1D6BMB4|A0A1D6BMB4_WHEAT	157	2.6e-78	300.4	73.9	A0A1D6BMB4_WHEAT	Uncharacterized protein	SubName: Full=Uncharacterized protein {ECO:0000313|EnsemblPlants:TRIAE_CS42_7AL_TGACv1_557191_AA1777870.2};
TRINITY_DN49841_c1_g1_i2	tr|N1QPB5|N1QPB5_AEGTA	36	8.3e-13	82	30.3	N1QPB5_AEGTA	Peptide transporter PTR2	SubName: Full=Peptide transporter PTR2 {ECO:0000313|EMBL:EMT00870.1, ECO:0000313|EnsemblPlants:EMT00870};
TRINITY_DN49841_c1_g1_i1	tr|N1QPB5|N1QPB5_AEGTA	36	5.7e-13	82	43.9	N1QPB5_AEGTA	Peptide transporter PTR2	SubName: Full=Peptide transporter PTR2 {ECO:0000313|EMBL:EMT00870.1, ECO:0000313|EnsemblPlants:EMT00870};
TRINITY_DN49841_c2_g1_i1	tr|A0A1D6D8V1|A0A1D6D8V1_WHEAT	93	8.7e-45	188	96.5	A0A1D6D8V1_WHEAT	Uncharacterized protein	SubName: Full=Uncharacterized protein {ECO:0000313|EnsemblPlants:TRIAE_CS42_U_TGACv1_641005_AA2082090.2};
TRINITY_DN49884_c0_g1_i1	tr|A0A287GGQ2|A0A287GGQ2_HORVV	35	1.8e-09	70.5	40.5	A0A287GGQ2_HORVV	Uncharacterized protein	SubName: Full=Uncharacterized protein {ECO:0000313|EnsemblPlants:HORVU1Hr1G080980.3};
TRINITY_DN49884_c2_g1_i1	tr|A0A1D5S6H0|A0A1D5S6H0_WHEAT	94	7.2e-34	151.8	93.4	A0A1D5S6H0_WHEAT	Uncharacterized protein	SubName: Full=Uncharacterized protein {ECO:0000313|EnsemblPlants:TRIAE_CS42_1BL_TGACv1_030390_AA0089240.3};
TRINITY_DN49815_c0_g1_i1	tr|A0A1D5YNE8|A0A1D5YNE8_WHEAT	56	1.7e-13	84	59.4	A0A1D5YNE8_WHEAT	Uncharacterized protein	SubName: Full=Uncharacterized protein {ECO:0000313|EnsemblPlants:TRIAE_CS42_5AL_TGACv1_376782_AA1240890.1};
TRINITY_DN49815_c1_g1_i2	tr|A0A1D5UB83|A0A1D5UB83_WHEAT	72	6.9e-29	135.6	55.4	A0A1D5UB83_WHEAT	Uncharacterized protein	SubName: Full=Uncharacterized protein {ECO:0000313|EnsemblPlants:TRIAE_CS42_2BS_TGACv1_146806_AA0473240.1};
TRINITY_DN49815_c1_g1_i1	tr|A0A1D5UYD3|A0A1D5UYD3_WHEAT	73	9.9e-31	141	93.6	A0A1D5UYD3_WHEAT	Uncharacterized protein	SubName: Full=Uncharacterized protein {ECO:0000313|EnsemblPlants:TRIAE_CS42_2DS_TGACv1_177840_AA0585630.1};
TRINITY_DN49815_c2_g1_i1	tr|A0A1D5Z7B9|A0A1D5Z7B9_WHEAT	65	3.1e-15	89.7	70.1	A0A1D5Z7B9_WHEAT	Uncharacterized protein	SubName: Full=Uncharacterized protein {ECO:0000313|EnsemblPlants:TRIAE_CS42_5BL_TGACv1_405908_AA1337510.1};
TRINITY_DN49824_c0_g1_i1	tr|A0A287RW98|A0A287RW98_HORVV	91	4.1e-15	89.4	90.1	A0A287RW98_HORVV	Uncharacterized protein	SubName: Full=Uncharacterized protein {ECO:0000313|EnsemblPlants:HORVU5Hr1G077600.1};
TRINITY_DN49842_c0_g1_i1	tr|A0A1D5YEP2|A0A1D5YEP2_WHEAT	149	3.5e-77	296.2	99.3	A0A1D5YEP2_WHEAT	Uncharacterized protein	SubName: Full=Uncharacterized protein {ECO:0000313|EnsemblPlants:TRIAE_CS42_5AL_TGACv1_374569_AA1203500.1};
TRINITY_DN49802_c0_g1_i2	tr|A0A1D5RS05|A0A1D5RS05_WHEAT	460	6.5e-194	685.6	96.9	A0A1D5RS05_WHEAT	Uncharacterized protein	SubName: Full=Uncharacterized protein {ECO:0000313|EnsemblPlants:TRIAE_CS42_1AL_TGACv1_000680_AA0016890.1};
TRINITY_DN49802_c0_g1_i1	tr|A0A1D5SQ10|A0A1D5SQ10_WHEAT	464	1.3e-192	681.4	91.7	A0A1D5SQ10_WHEAT	Uncharacterized protein	SubName: Full=Uncharacterized protein {ECO:0000313|EnsemblPlants:TRIAE_CS42_1DL_TGACv1_061111_AA0185740.1};
TRINITY_DN49839_c0_g1_i1	tr|W5B262|W5B262_WHEAT	25	2.5e-05	56.6	31.6	W5B262_WHEAT	Uncharacterized protein	SubName: Full=Uncharacterized protein {ECO:0000313|EnsemblPlants:TRIAE_CS42_2AS_TGACv1_112071_AA0329470.1};
TRINITY_DN49827_c0_g1_i4	tr|W5FH46|W5FH46_WHEAT	338	7.1e-171	609	78.2	W5FH46_WHEAT	Uncharacterized protein	SubName: Full=Uncharacterized protein {ECO:0000313|EnsemblPlants:TRIAE_CS42_5BL_TGACv1_407294_AA1355540.1};
TRINITY_DN49827_c0_g1_i5	tr|A0A1D5ZR86|A0A1D5ZR86_WHEAT	328	1.4e-166	594.7	76.2	A0A1D5ZR86_WHEAT	Uncharacterized protein	SubName: Full=Uncharacterized protein {ECO:0000313|EnsemblPlants:TRIAE_CS42_5DL_TGACv1_434198_AA1431470.1};
TRINITY_DN49827_c0_g1_i1	tr|A0A1D5ZR86|A0A1D5ZR86_WHEAT	338	9.9e-173	615.1	78.4	A0A1D5ZR86_WHEAT	Uncharacterized protein	SubName: Full=Uncharacterized protein {ECO:0000313|EnsemblPlants:TRIAE_CS42_5DL_TGACv1_434198_AA1431470.1};
TRINITY_DN49827_c1_g1_i1	tr|A0A1D5RP31|A0A1D5RP31_WHEAT	101	9.3e-29	134.8	97.7	A0A1D5RP31_WHEAT	Uncharacterized protein	SubName: Full=Uncharacterized protein {ECO:0000313|EnsemblPlants:TRIAE_CS42_1AL_TGACv1_000035_AA0001030.1};
TRINITY_DN49864_c0_g1_i12	tr|A0A1D5STW5|A0A1D5STW5_WHEAT	136	4.8e-59	237.3	36.6	A0A1D5STW5_WHEAT	Uncharacterized protein	SubName: Full=Uncharacterized protein {ECO:0000313|EnsemblPlants:TRIAE_CS42_1DL_TGACv1_061867_AA0204740.2};
TRINITY_DN49864_c0_g1_i8	tr|M8BX67|M8BX67_AEGTA	176	3.7e-87	331.3	31.6	M8BX67_AEGTA	Uncharacterized protein	SubName: Full=Uncharacterized protein {ECO:0000313|EMBL:EMT07538.1, ECO:0000313|EnsemblPlants:EMT07538};
TRINITY_DN49864_c0_g1_i4	tr|A0A1D5SH18|A0A1D5SH18_WHEAT	119	7.4e-48	198.7	79.7	A0A1D5SH18_WHEAT	Uncharacterized protein	SubName: Full=Uncharacterized protein {ECO:0000313|EnsemblPlants:TRIAE_CS42_1BL_TGACv1_033387_AA0139120.2};
TRINITY_DN49864_c0_g1_i13	tr|M8BX67|M8BX67_AEGTA	107	9.4e-48	198	99.1	M8BX67_AEGTA	Uncharacterized protein	SubName: Full=Uncharacterized protein {ECO:0000313|EMBL:EMT07538.1, ECO:0000313|EnsemblPlants:EMT07538};
TRINITY_DN49864_c0_g1_i9	tr|A0A1D5STW5|A0A1D5STW5_WHEAT	136	4.4e-59	237.3	40.4	A0A1D5STW5_WHEAT	Uncharacterized protein	SubName: Full=Uncharacterized protein {ECO:0000313|EnsemblPlants:TRIAE_CS42_1DL_TGACv1_061867_AA0204740.2};
TRINITY_DN49864_c0_g1_i6	tr|A0A1D5SH18|A0A1D5SH18_WHEAT	173	2.6e-75	291.2	50.1	A0A1D5SH18_WHEAT	Uncharacterized protein	SubName: Full=Uncharacterized protein {ECO:0000313|EnsemblPlants:TRIAE_CS42_1BL_TGACv1_033387_AA0139120.2};
TRINITY_DN49864_c0_g1_i3	tr|M8BX67|M8BX67_AEGTA	65	8.5e-27	130.6	13.1	M8BX67_AEGTA	Uncharacterized protein	SubName: Full=Uncharacterized protein {ECO:0000313|EMBL:EMT07538.1, ECO:0000313|EnsemblPlants:EMT07538};
TRINITY_DN49864_c0_g1_i1	tr|A0A1D5SH18|A0A1D5SH18_WHEAT	171	3.2e-86	327.4	50.3	A0A1D5SH18_WHEAT	Uncharacterized protein	SubName: Full=Uncharacterized protein {ECO:0000313|EnsemblPlants:TRIAE_CS42_1BL_TGACv1_033387_AA0139120.2};
TRINITY_DN49864_c0_g1_i7	tr|A0A1D5SH18|A0A1D5SH18_WHEAT	171	3.6e-86	327.4	45.6	A0A1D5SH18_WHEAT	Uncharacterized protein	SubName: Full=Uncharacterized protein {ECO:0000313|EnsemblPlants:TRIAE_CS42_1BL_TGACv1_033387_AA0139120.2};
TRINITY_DN49864_c0_g1_i15	tr|M8BX67|M8BX67_AEGTA	123	2.9e-61	245	26	M8BX67_AEGTA	Uncharacterized protein	SubName: Full=Uncharacterized protein {ECO:0000313|EMBL:EMT07538.1, ECO:0000313|EnsemblPlants:EMT07538};
TRINITY_DN49864_c0_g1_i5	tr|M8BX67|M8BX67_AEGTA	176	3.9e-87	331.3	29.8	M8BX67_AEGTA	Uncharacterized protein	SubName: Full=Uncharacterized protein {ECO:0000313|EMBL:EMT07538.1, ECO:0000313|EnsemblPlants:EMT07538};
TRINITY_DN49864_c0_g1_i2	tr|A0A1D5SH16|A0A1D5SH16_WHEAT	172	1.5e-77	299.3	30.9	A0A1D5SH16_WHEAT	Uncharacterized protein	SubName: Full=Uncharacterized protein {ECO:0000313|EnsemblPlants:TRIAE_CS42_1BL_TGACv1_033387_AA0139110.1};
TRINITY_DN49864_c0_g1_i11	tr|A0A1D5SH18|A0A1D5SH18_WHEAT	179	2.3e-59	238	56.7	A0A1D5SH18_WHEAT	Uncharacterized protein	SubName: Full=Uncharacterized protein {ECO:0000313|EnsemblPlants:TRIAE_CS42_1BL_TGACv1_033387_AA0139120.2};
TRINITY_DN49896_c0_g1_i1	tr|A0A1D5ZYN4|A0A1D5ZYN4_WHEAT	110	1.1e-56	227.6	99.4	A0A1D5ZYN4_WHEAT	Uncharacterized protein	SubName: Full=Uncharacterized protein {ECO:0000313|EnsemblPlants:TRIAE_CS42_5DL_TGACv1_436717_AA1462900.1};
TRINITY_DN13710_c0_g1_i7	tr|W5BRS9|W5BRS9_WHEAT	343	8.7e-192	678.7	66.2	W5BRS9_WHEAT	S-acyltransferase; Palmitoyltransferase	RecName: Full=S-acyltransferase {ECO:0000256|RuleBase:RU079119}; EC=2.3.1.225 {ECO:0000256|RuleBase:RU079119}; AltName: Full=Palmitoyltransferase {ECO:0000256|RuleBase:RU079119};
TRINITY_DN13710_c0_g1_i6	tr|W5BRS9|W5BRS9_WHEAT	207	1.6e-121	444.9	53.3	W5BRS9_WHEAT	S-acyltransferase; Palmitoyltransferase	RecName: Full=S-acyltransferase {ECO:0000256|RuleBase:RU079119}; EC=2.3.1.225 {ECO:0000256|RuleBase:RU079119}; AltName: Full=Palmitoyltransferase {ECO:0000256|RuleBase:RU079119};
TRINITY_DN13710_c0_g1_i3	tr|A0A1D5UPC3|A0A1D5UPC3_WHEAT	367	1.1e-206	728	81.7	A0A1D5UPC3_WHEAT	S-acyltransferase; Palmitoyltransferase	RecName: Full=S-acyltransferase {ECO:0000256|RuleBase:RU079119}; EC=2.3.1.225 {ECO:0000256|RuleBase:RU079119}; AltName: Full=Palmitoyltransferase {ECO:0000256|RuleBase:RU079119};
TRINITY_DN13710_c0_g1_i8	tr|A0A1D5UPC3|A0A1D5UPC3_WHEAT	79	1.6e-40	174.9	39	A0A1D5UPC3_WHEAT	S-acyltransferase; Palmitoyltransferase	RecName: Full=S-acyltransferase {ECO:0000256|RuleBase:RU079119}; EC=2.3.1.225 {ECO:0000256|RuleBase:RU079119}; AltName: Full=Palmitoyltransferase {ECO:0000256|RuleBase:RU079119};
TRINITY_DN13710_c0_g1_i2	tr|A0A1D5UPC3|A0A1D5UPC3_WHEAT	367	1.3e-206	728	67.7	A0A1D5UPC3_WHEAT	S-acyltransferase; Palmitoyltransferase	RecName: Full=S-acyltransferase {ECO:0000256|RuleBase:RU079119}; EC=2.3.1.225 {ECO:0000256|RuleBase:RU079119}; AltName: Full=Palmitoyltransferase {ECO:0000256|RuleBase:RU079119};
TRINITY_DN13710_c0_g1_i1	tr|W5BRS9|W5BRS9_WHEAT	343	8.7e-192	678.7	66.8	W5BRS9_WHEAT	S-acyltransferase; Palmitoyltransferase	RecName: Full=S-acyltransferase {ECO:0000256|RuleBase:RU079119}; EC=2.3.1.225 {ECO:0000256|RuleBase:RU079119}; AltName: Full=Palmitoyltransferase {ECO:0000256|RuleBase:RU079119};
TRINITY_DN13710_c0_g1_i13	tr|A0A1D5UPC3|A0A1D5UPC3_WHEAT	263	1.7e-156	560.8	77.4	A0A1D5UPC3_WHEAT	S-acyltransferase; Palmitoyltransferase	RecName: Full=S-acyltransferase {ECO:0000256|RuleBase:RU079119}; EC=2.3.1.225 {ECO:0000256|RuleBase:RU079119}; AltName: Full=Palmitoyltransferase {ECO:0000256|RuleBase:RU079119};
TRINITY_DN13710_c0_g1_i10	tr|A0A1D5UPC3|A0A1D5UPC3_WHEAT	367	1.3e-206	728	68.3	A0A1D5UPC3_WHEAT	S-acyltransferase; Palmitoyltransferase	RecName: Full=S-acyltransferase {ECO:0000256|RuleBase:RU079119}; EC=2.3.1.225 {ECO:0000256|RuleBase:RU079119}; AltName: Full=Palmitoyltransferase {ECO:0000256|RuleBase:RU079119};
TRINITY_DN13710_c0_g1_i4	tr|A0A1D5UPC3|A0A1D5UPC3_WHEAT	136	1.9e-59	238	55.3	A0A1D5UPC3_WHEAT	S-acyltransferase; Palmitoyltransferase	RecName: Full=S-acyltransferase {ECO:0000256|RuleBase:RU079119}; EC=2.3.1.225 {ECO:0000256|RuleBase:RU079119}; AltName: Full=Palmitoyltransferase {ECO:0000256|RuleBase:RU079119};
TRINITY_DN13710_c0_g1_i12	tr|W5BRS9|W5BRS9_WHEAT	239	2.5e-141	511.1	45.4	W5BRS9_WHEAT	S-acyltransferase; Palmitoyltransferase	RecName: Full=S-acyltransferase {ECO:0000256|RuleBase:RU079119}; EC=2.3.1.225 {ECO:0000256|RuleBase:RU079119}; AltName: Full=Palmitoyltransferase {ECO:0000256|RuleBase:RU079119};
TRINITY_DN13710_c0_g1_i11	tr|A0A1D5T9G6|A0A1D5T9G6_WHEAT	406	4.4e-201	709.5	83.1	A0A1D5T9G6_WHEAT	S-acyltransferase; Palmitoyltransferase	RecName: Full=S-acyltransferase {ECO:0000256|RuleBase:RU079119}; EC=2.3.1.225 {ECO:0000256|RuleBase:RU079119}; AltName: Full=Palmitoyltransferase {ECO:0000256|RuleBase:RU079119};
TRINITY_DN13773_c0_g1_i12	tr|A0A1D5SJ78|A0A1D5SJ78_WHEAT	156	1.6e-29	140.2	20.5	A0A1D5SJ78_WHEAT	Uncharacterized protein	SubName: Full=Uncharacterized protein {ECO:0000313|EnsemblPlants:TRIAE_CS42_1BS_TGACv1_049480_AA0154530.1};
TRINITY_DN13773_c0_g1_i8	tr|A0A1D5SJ78|A0A1D5SJ78_WHEAT	156	1.7e-29	140.2	20.1	A0A1D5SJ78_WHEAT	Uncharacterized protein	SubName: Full=Uncharacterized protein {ECO:0000313|EnsemblPlants:TRIAE_CS42_1BS_TGACv1_049480_AA0154530.1};
TRINITY_DN13773_c0_g1_i7	tr|A0A1D5SJ78|A0A1D5SJ78_WHEAT	156	1.7e-29	140.2	19.9	A0A1D5SJ78_WHEAT	Uncharacterized protein	SubName: Full=Uncharacterized protein {ECO:0000313|EnsemblPlants:TRIAE_CS42_1BS_TGACv1_049480_AA0154530.1};
TRINITY_DN13773_c0_g1_i9	tr|A0A1D5SJ78|A0A1D5SJ78_WHEAT	156	1.6e-29	140.2	20.6	A0A1D5SJ78_WHEAT	Uncharacterized protein	SubName: Full=Uncharacterized protein {ECO:0000313|EnsemblPlants:TRIAE_CS42_1BS_TGACv1_049480_AA0154530.1};
TRINITY_DN13773_c0_g1_i16	tr|A0A1D5SJ78|A0A1D5SJ78_WHEAT	156	1.6e-29	140.2	20.6	A0A1D5SJ78_WHEAT	Uncharacterized protein	SubName: Full=Uncharacterized protein {ECO:0000313|EnsemblPlants:TRIAE_CS42_1BS_TGACv1_049480_AA0154530.1};
TRINITY_DN13773_c0_g1_i18	tr|A0A1D5SJ78|A0A1D5SJ78_WHEAT	156	1.6e-29	140.2	21.1	A0A1D5SJ78_WHEAT	Uncharacterized protein	SubName: Full=Uncharacterized protein {ECO:0000313|EnsemblPlants:TRIAE_CS42_1BS_TGACv1_049480_AA0154530.1};
TRINITY_DN13773_c0_g1_i22	tr|A0A1D5SJ78|A0A1D5SJ78_WHEAT	156	1.7e-29	140.2	20	A0A1D5SJ78_WHEAT	Uncharacterized protein	SubName: Full=Uncharacterized protein {ECO:0000313|EnsemblPlants:TRIAE_CS42_1BS_TGACv1_049480_AA0154530.1};
TRINITY_DN13773_c0_g1_i14	tr|M8BL66|M8BL66_AEGTA	30	0.00019	54.7	19.3	M8BL66_AEGTA	Uncharacterized protein	SubName: Full=Uncharacterized protein {ECO:0000313|EMBL:EMT07524.1, ECO:0000313|EnsemblPlants:EMT07524};
TRINITY_DN13773_c0_g1_i19	tr|A0A1D5SJ78|A0A1D5SJ78_WHEAT	156	1.6e-29	140.2	20.4	A0A1D5SJ78_WHEAT	Uncharacterized protein	SubName: Full=Uncharacterized protein {ECO:0000313|EnsemblPlants:TRIAE_CS42_1BS_TGACv1_049480_AA0154530.1};
TRINITY_DN13773_c0_g1_i5	tr|M8BL66|M8BL66_AEGTA	38	0.00013	55.5	20.9	M8BL66_AEGTA	Uncharacterized protein	SubName: Full=Uncharacterized protein {ECO:0000313|EMBL:EMT07524.1, ECO:0000313|EnsemblPlants:EMT07524};
TRINITY_DN13773_c0_g1_i20	tr|A0A1D5S1Q7|A0A1D5S1Q7_WHEAT	42	6.9e-10	74.7	6.8	A0A1D5S1Q7_WHEAT	Uncharacterized protein	SubName: Full=Uncharacterized protein {ECO:0000313|EnsemblPlants:TRIAE_CS42_1AS_TGACv1_019221_AA0063420.2};
TRINITY_DN13773_c0_g1_i13	tr|A0A1D5SJ78|A0A1D5SJ78_WHEAT	156	1.6e-29	140.2	21.3	A0A1D5SJ78_WHEAT	Uncharacterized protein	SubName: Full=Uncharacterized protein {ECO:0000313|EnsemblPlants:TRIAE_CS42_1BS_TGACv1_049480_AA0154530.1};
TRINITY_DN13773_c0_g1_i10	tr|A0A1D5SJ78|A0A1D5SJ78_WHEAT	156	1.6e-29	140.2	20.7	A0A1D5SJ78_WHEAT	Uncharacterized protein	SubName: Full=Uncharacterized protein {ECO:0000313|EnsemblPlants:TRIAE_CS42_1BS_TGACv1_049480_AA0154530.1};
TRINITY_DN13745_c0_g1_i4	tr|A0A1D5TY82|A0A1D5TY82_WHEAT	437	5.2e-254	885.6	76.6	A0A1D5TY82_WHEAT	Uncharacterized protein	SubName: Full=Uncharacterized protein {ECO:0000313|EnsemblPlants:TRIAE_CS42_2BL_TGACv1_130085_AA0403400.1};
TRINITY_DN13745_c0_g1_i2	tr|A0A1D5TY82|A0A1D5TY82_WHEAT	194	2.8e-116	427.2	61.7	A0A1D5TY82_WHEAT	Uncharacterized protein	SubName: Full=Uncharacterized protein {ECO:0000313|EnsemblPlants:TRIAE_CS42_2BL_TGACv1_130085_AA0403400.1};
TRINITY_DN13745_c0_g1_i1	tr|M8C8T4|M8C8T4_AEGTA	148	6.5e-83	316.6	38.3	M8C8T4_AEGTA	Uncharacterized protein	SubName: Full=Uncharacterized protein {ECO:0000313|EMBL:EMT23457.1, ECO:0000313|EnsemblPlants:EMT23457};
TRINITY_DN13771_c0_g1_i5	tr|A0A077RQB7|A0A077RQB7_WHEAT	114	5.5e-56	228	16.2	A0A077RQB7_WHEAT	Uncharacterized protein	SubName: Full=Uncharacterized protein {ECO:0000313|EMBL:CDM81616.1};
TRINITY_DN13771_c0_g1_i4	tr|A0A1D5XX35|A0A1D5XX35_WHEAT	112	3.6e-59	238.4	18.3	A0A1D5XX35_WHEAT	Uncharacterized protein	SubName: Full=Uncharacterized protein {ECO:0000313|EnsemblPlants:TRIAE_CS42_4DL_TGACv1_342681_AA1119680.1};
TRINITY_DN13771_c0_g1_i2	tr|A0A077RQB7|A0A077RQB7_WHEAT	114	5.2e-56	228	17.2	A0A077RQB7_WHEAT	Uncharacterized protein	SubName: Full=Uncharacterized protein {ECO:0000313|EMBL:CDM81616.1};
TRINITY_DN13771_c0_g1_i1	tr|A0A077RQB7|A0A077RQB7_WHEAT	114	5.6e-56	228	16.1	A0A077RQB7_WHEAT	Uncharacterized protein	SubName: Full=Uncharacterized protein {ECO:0000313|EMBL:CDM81616.1};
TRINITY_DN13771_c0_g1_i3	tr|A0A1D5XX35|A0A1D5XX35_WHEAT	112	3.3e-59	238.4	19.8	A0A1D5XX35_WHEAT	Uncharacterized protein	SubName: Full=Uncharacterized protein {ECO:0000313|EnsemblPlants:TRIAE_CS42_4DL_TGACv1_342681_AA1119680.1};
TRINITY_DN13771_c0_g3_i1	tr|N1R1N6|N1R1N6_AEGTA	50	4.4e-13	83.2	35.5	N1R1N6_AEGTA	Uncharacterized protein	SubName: Full=Uncharacterized protein {ECO:0000313|EMBL:EMT20414.1, ECO:0000313|EnsemblPlants:EMT20414};
TRINITY_DN13771_c0_g4_i1	tr|M8C3A4|M8C3A4_AEGTA	43	4.1e-15	91.3	12.2	M8C3A4_AEGTA	Putative phospholipid-transporting ATPase 2	SubName: Full=Putative phospholipid-transporting ATPase 2 {ECO:0000313|EMBL:EMT31730.1, ECO:0000313|EnsemblPlants:EMT31730};
TRINITY_DN13771_c0_g7_i3	tr|N1QY93|N1QY93_AEGTA	46	1.7e-15	90.5	52.5	N1QY93_AEGTA	Anaphase-promoting complex subunit 1	SubName: Full=Anaphase-promoting complex subunit 1 {ECO:0000313|EMBL:EMT16988.1, ECO:0000313|EnsemblPlants:EMT16988};
TRINITY_DN13771_c0_g7_i1	tr|N1QY93|N1QY93_AEGTA	40	1.2e-13	84.3	45.8	N1QY93_AEGTA	Anaphase-promoting complex subunit 1	SubName: Full=Anaphase-promoting complex subunit 1 {ECO:0000313|EMBL:EMT16988.1, ECO:0000313|EnsemblPlants:EMT16988};
TRINITY_DN13771_c0_g7_i2	tr|R7WFL2|R7WFL2_AEGTA	168	3.1e-84	322.8	12.8	R7WFL2_AEGTA	Uncharacterized protein	SubName: Full=Uncharacterized protein {ECO:0000313|EMBL:EMT19099.1, ECO:0000313|EnsemblPlants:EMT19099};
TRINITY_DN13780_c0_g1_i1	tr|M8AYF6|M8AYF6_AEGTA	48	7.8e-09	71.6	5.8	M8AYF6_AEGTA	UDP-N-acetylglucosamine--N-acetylmuramyl-(Pentapeptide) pyrophosphoryl-undecaprenol N-acetylglucosamine transferase	SubName: Full=UDP-N-acetylglucosamine--N-acetylmuramyl-(Pentapeptide) pyrophosphoryl-undecaprenol N-acetylglucosamine transferase {ECO:0000313|EMBL:EMT06710.1};
TRINITY_DN13780_c0_g1_i2	tr|M8AYF6|M8AYF6_AEGTA	48	7.3e-09	71.6	6.2	M8AYF6_AEGTA	UDP-N-acetylglucosamine--N-acetylmuramyl-(Pentapeptide) pyrophosphoryl-undecaprenol N-acetylglucosamine transferase	SubName: Full=UDP-N-acetylglucosamine--N-acetylmuramyl-(Pentapeptide) pyrophosphoryl-undecaprenol N-acetylglucosamine transferase {ECO:0000313|EMBL:EMT06710.1};
TRINITY_DN13725_c0_g1_i1	tr|M8AXX2|M8AXX2_AEGTA	73	7.4e-31	142.9	32.7	M8AXX2_AEGTA	Mitochondrial import inner membrane translocase subunit Tim8	SubName: Full=Mitochondrial import inner membrane translocase subunit Tim8 {ECO:0000313|EMBL:EMT06545.1, ECO:0000313|EnsemblPlants:EMT06545};
TRINITY_DN13725_c0_g1_i4	tr|M7ZRC3|M7ZRC3_TRIUA	73	3e-32	147.5	32.4	M7ZRC3_TRIUA	Mitochondrial import inner membrane translocase subunit Tim8	SubName: Full=Mitochondrial import inner membrane translocase subunit Tim8 {ECO:0000313|EMBL:EMS50634.1, ECO:0000313|EnsemblPlants:TRIUR3_09703-P1};
TRINITY_DN13725_c0_g1_i3	tr|M8AXX2|M8AXX2_AEGTA	73	1.2e-32	149.1	29.1	M8AXX2_AEGTA	Mitochondrial import inner membrane translocase subunit Tim8	SubName: Full=Mitochondrial import inner membrane translocase subunit Tim8 {ECO:0000313|EMBL:EMT06545.1, ECO:0000313|EnsemblPlants:EMT06545};
TRINITY_DN13725_c0_g1_i2	tr|M7ZRC3|M7ZRC3_TRIUA	73	1.5e-31	145.2	32.3	M7ZRC3_TRIUA	Mitochondrial import inner membrane translocase subunit Tim8	SubName: Full=Mitochondrial import inner membrane translocase subunit Tim8 {ECO:0000313|EMBL:EMS50634.1, ECO:0000313|EnsemblPlants:TRIUR3_09703-P1};
TRINITY_DN13701_c3_g1_i1	tr|A0A0C4FD30|A0A0C4FD30_PUCT1	86	7.8e-30	138.7	69.4	A0A0C4FD30_PUCT1	Uncharacterized protein	SubName: Full=Uncharacterized protein {ECO:0000313|EMBL:OAV84714.1, ECO:0000313|EnsemblFungi:PTTG_11134P0};
TRINITY_DN13700_c0_g1_i2	tr|A0A1D5TGW0|A0A1D5TGW0_WHEAT	185	9.6e-80	307	25.7	A0A1D5TGW0_WHEAT	Uncharacterized protein	SubName: Full=Uncharacterized protein {ECO:0000313|EnsemblPlants:TRIAE_CS42_2AL_TGACv1_096689_AA0320610.3};
TRINITY_DN13700_c0_g1_i1	tr|A0A1D5TGW0|A0A1D5TGW0_WHEAT	185	9.7e-80	307	25.4	A0A1D5TGW0_WHEAT	Uncharacterized protein	SubName: Full=Uncharacterized protein {ECO:0000313|EnsemblPlants:TRIAE_CS42_2AL_TGACv1_096689_AA0320610.3};
TRINITY_DN13700_c0_g3_i3	tr|T1NS57|T1NS57_TRIUA	46	3.6e-09	72.8	5.5	T1NS57_TRIUA	Uncharacterized protein	SubName: Full=Uncharacterized protein {ECO:0000313|EnsemblPlants:TRIUR3_33641-P1};
TRINITY_DN13700_c0_g3_i7	tr|T1NS57|T1NS57_TRIUA	46	3.8e-09	72.8	5.1	T1NS57_TRIUA	Uncharacterized protein	SubName: Full=Uncharacterized protein {ECO:0000313|EnsemblPlants:TRIUR3_33641-P1};
TRINITY_DN13700_c0_g3_i2	tr|T1NS57|T1NS57_TRIUA	46	3.9e-09	72.8	5	T1NS57_TRIUA	Uncharacterized protein	SubName: Full=Uncharacterized protein {ECO:0000313|EnsemblPlants:TRIUR3_33641-P1};
TRINITY_DN13700_c0_g3_i1	tr|T1NS57|T1NS57_TRIUA	46	3.2e-09	72.8	6.1	T1NS57_TRIUA	Uncharacterized protein	SubName: Full=Uncharacterized protein {ECO:0000313|EnsemblPlants:TRIUR3_33641-P1};
TRINITY_DN13700_c0_g3_i5	tr|T1NS57|T1NS57_TRIUA	46	3.4e-09	72.8	5.7	T1NS57_TRIUA	Uncharacterized protein	SubName: Full=Uncharacterized protein {ECO:0000313|EnsemblPlants:TRIUR3_33641-P1};
TRINITY_DN13700_c0_g3_i4	tr|T1NS57|T1NS57_TRIUA	94	3.4e-28	134	42.2	T1NS57_TRIUA	Uncharacterized protein	SubName: Full=Uncharacterized protein {ECO:0000313|EnsemblPlants:TRIUR3_33641-P1};
TRINITY_DN13770_c1_g1_i1	tr|M7Z4L6|M7Z4L6_TRIUA	85	1.4e-38	167.2	98.8	M7Z4L6_TRIUA	Uncharacterized protein	SubName: Full=Uncharacterized protein {ECO:0000313|EMBL:EMS58053.1, ECO:0000313|EnsemblPlants:TRIUR3_06820-P1};
TRINITY_DN13716_c0_g1_i1	tr|A0A077RF68|A0A077RF68_WHEAT	241	7.2e-67	263.5	56.5	A0A077RF68_WHEAT	Uncharacterized protein	SubName: Full=Uncharacterized protein {ECO:0000313|EMBL:CDJ26425.1, ECO:0000313|EnsemblPlants:TRIAE_CS42_3B_TGACv1_223733_AA0786370.2};
TRINITY_DN13716_c0_g1_i3	tr|A0A077RF68|A0A077RF68_WHEAT	385	7.2e-158	565.8	84.8	A0A077RF68_WHEAT	Uncharacterized protein	SubName: Full=Uncharacterized protein {ECO:0000313|EMBL:CDJ26425.1, ECO:0000313|EnsemblPlants:TRIAE_CS42_3B_TGACv1_223733_AA0786370.2};
TRINITY_DN13716_c0_g1_i2	tr|A0A077RF68|A0A077RF68_WHEAT	635	0	1082.8	96	A0A077RF68_WHEAT	Uncharacterized protein	SubName: Full=Uncharacterized protein {ECO:0000313|EMBL:CDJ26425.1, ECO:0000313|EnsemblPlants:TRIAE_CS42_3B_TGACv1_223733_AA0786370.2};
TRINITY_DN13716_c0_g2_i1	tr|A0A1X9ZIA0|A0A1X9ZIA0_WHEAT	77	2.6e-29	137.5	40.6	A0A1X9ZIA0_WHEAT	SHR	SubName: Full=SHR {ECO:0000313|EMBL:ARS45120.1};
TRINITY_DN13716_c2_g1_i1	tr|A0A077RF68|A0A077RF68_WHEAT	76	2e-28	133.3	100	A0A077RF68_WHEAT	Uncharacterized protein	SubName: Full=Uncharacterized protein {ECO:0000313|EMBL:CDJ26425.1, ECO:0000313|EnsemblPlants:TRIAE_CS42_3B_TGACv1_223733_AA0786370.2};
TRINITY_DN13713_c0_g1_i3	tr|A0A1D6BMY9|A0A1D6BMY9_WHEAT	182	1e-96	362.5	47.2	A0A1D6BMY9_WHEAT	Uncharacterized protein	SubName: Full=Uncharacterized protein {ECO:0000313|EnsemblPlants:TRIAE_CS42_7AL_TGACv1_557425_AA1781170.1};
TRINITY_DN13713_c0_g1_i2	tr|M7YNB9|M7YNB9_TRIUA	78	4.5e-35	156.4	50.2	M7YNB9_TRIUA	Uncharacterized protein	SubName: Full=Uncharacterized protein {ECO:0000313|EMBL:EMS48436.1, ECO:0000313|EnsemblPlants:TRIUR3_02208-P1};
TRINITY_DN13714_c0_g1_i1	tr|M7YHY1|M7YHY1_TRIUA	74	1.1e-26	127.5	98.7	M7YHY1_TRIUA	Paired amphipathic helix protein Sin3-like 3	SubName: Full=Paired amphipathic helix protein Sin3-like 3 {ECO:0000313|EMBL:EMS46396.1, ECO:0000313|EnsemblPlants:TRIUR3_25254-P1};
TRINITY_DN13776_c0_g1_i2	tr|E1U291|E1U291_WHEAT	129	8.6e-72	278.1	99.5	E1U291_WHEAT	ZTL	SubName: Full=ZTL {ECO:0000313|EMBL:ABR14627.1};
TRINITY_DN13776_c0_g1_i1	tr|E1U291|E1U291_WHEAT	88	4.2e-46	192.2	99.6	E1U291_WHEAT	ZTL	SubName: Full=ZTL {ECO:0000313|EMBL:ABR14627.1};
TRINITY_DN13723_c0_g1_i3	tr|M8C0M6|M8C0M6_AEGTA	785	0	1310	89.7	M8C0M6_AEGTA	Uncharacterized protein	SubName: Full=Uncharacterized protein {ECO:0000313|EMBL:EMT27613.1, ECO:0000313|EnsemblPlants:EMT27613};
TRINITY_DN13723_c0_g1_i4	tr|T1NMU9|T1NMU9_TRIUA	777	0	1281.2	98.7	T1NMU9_TRIUA	Uncharacterized protein	SubName: Full=Uncharacterized protein {ECO:0000313|EnsemblPlants:TRIUR3_32067-P1};
TRINITY_DN13723_c0_g1_i2	tr|M8C0M6|M8C0M6_AEGTA	785	0	1309.7	84.7	M8C0M6_AEGTA	Uncharacterized protein	SubName: Full=Uncharacterized protein {ECO:0000313|EMBL:EMT27613.1, ECO:0000313|EnsemblPlants:EMT27613};
TRINITY_DN13723_c0_g1_i5	tr|M8C0M6|M8C0M6_AEGTA	785	0	1309.7	84.1	M8C0M6_AEGTA	Uncharacterized protein	SubName: Full=Uncharacterized protein {ECO:0000313|EMBL:EMT27613.1, ECO:0000313|EnsemblPlants:EMT27613};
TRINITY_DN13723_c0_g1_i6	tr|M8C0M6|M8C0M6_AEGTA	785	0	1310	81.3	M8C0M6_AEGTA	Uncharacterized protein	SubName: Full=Uncharacterized protein {ECO:0000313|EMBL:EMT27613.1, ECO:0000313|EnsemblPlants:EMT27613};
TRINITY_DN13723_c0_g2_i1	tr|Q7XDD5|Q7XDD5_ORYSJ	42	1.7e-08	67.4	43.2	Q7XDD5_ORYSJ	Os10g0477200 protein; PPR986-12, putative, expressed; cDNA clone:J013097P22, full insert sequence	SubName: Full=Os10g0477200 protein {ECO:0000313|EMBL:BAF26769.1}; SubName: Full=PPR986-12, putative, expressed {ECO:0000313|EMBL:AAP54276.2}; SubName: Full=cDNA clone:J013097P22, full insert sequence {ECO:0000313|EMBL:BAG90290.1};
TRINITY_DN13743_c0_g1_i3	tr|A0A1D6S1W8|A0A1D6S1W8_WHEAT	883	0	1538.9	83.8	A0A1D6S1W8_WHEAT	Uncharacterized protein	SubName: Full=Uncharacterized protein {ECO:0000313|EnsemblPlants:TRIAE_CS42_5AL_TGACv1_377519_AA1247640.1};
TRINITY_DN13743_c0_g1_i1	tr|W5FFF8|W5FFF8_WHEAT	369	4.6e-207	729.2	86.3	W5FFF8_WHEAT	Uncharacterized protein	SubName: Full=Uncharacterized protein {ECO:0000313|EnsemblPlants:TRIAE_CS42_5BL_TGACv1_406599_AA1347610.3};
TRINITY_DN13743_c0_g1_i5	tr|W5FFF8|W5FFF8_WHEAT	883	0	1613.6	82.7	W5FFF8_WHEAT	Uncharacterized protein	SubName: Full=Uncharacterized protein {ECO:0000313|EnsemblPlants:TRIAE_CS42_5BL_TGACv1_406599_AA1347610.3};
TRINITY_DN13743_c0_g1_i2	tr|W5FFF8|W5FFF8_WHEAT	883	0	1613.6	83.2	W5FFF8_WHEAT	Uncharacterized protein	SubName: Full=Uncharacterized protein {ECO:0000313|EnsemblPlants:TRIAE_CS42_5BL_TGACv1_406599_AA1347610.3};
TRINITY_DN13743_c0_g1_i4	tr|A0A1D5ZRM6|A0A1D5ZRM6_WHEAT	883	0	1616.7	85.5	A0A1D5ZRM6_WHEAT	Uncharacterized protein	SubName: Full=Uncharacterized protein {ECO:0000313|EnsemblPlants:TRIAE_CS42_5DL_TGACv1_434281_AA1433110.2};
TRINITY_DN13769_c0_g1_i5	tr|W5G8V3|W5G8V3_WHEAT	298	8.3e-167	595.9	51.5	W5G8V3_WHEAT	Uncharacterized protein	SubName: Full=Uncharacterized protein {ECO:0000313|EnsemblPlants:TRIAE_CS42_6DL_TGACv1_526303_AA1679040.1};
TRINITY_DN13769_c0_g1_i1	tr|W5G8V3|W5G8V3_WHEAT	156	5.8e-75	290.8	26.6	W5G8V3_WHEAT	Uncharacterized protein	SubName: Full=Uncharacterized protein {ECO:0000313|EnsemblPlants:TRIAE_CS42_6DL_TGACv1_526303_AA1679040.1};
TRINITY_DN13769_c0_g1_i8	tr|M7YKG1|M7YKG1_TRIUA	143	1.5e-81	313.5	14	M7YKG1_TRIUA	Uncharacterized protein	SubName: Full=Uncharacterized protein {ECO:0000313|EMBL:EMS47356.1, ECO:0000313|EnsemblPlants:TRIUR3_22609-P1};
TRINITY_DN13769_c0_g1_i2	tr|M7YKG1|M7YKG1_TRIUA	143	1.4e-81	313.5	14.1	M7YKG1_TRIUA	Uncharacterized protein	SubName: Full=Uncharacterized protein {ECO:0000313|EMBL:EMS47356.1, ECO:0000313|EnsemblPlants:TRIUR3_22609-P1};
TRINITY_DN13769_c0_g1_i3	tr|M7YKG1|M7YKG1_TRIUA	143	1.4e-81	313.5	14.1	M7YKG1_TRIUA	Uncharacterized protein	SubName: Full=Uncharacterized protein {ECO:0000313|EMBL:EMS47356.1, ECO:0000313|EnsemblPlants:TRIUR3_22609-P1};
TRINITY_DN13769_c0_g1_i6	tr|W5G8V3|W5G8V3_WHEAT	298	8.3e-167	595.9	51.5	W5G8V3_WHEAT	Uncharacterized protein	SubName: Full=Uncharacterized protein {ECO:0000313|EnsemblPlants:TRIAE_CS42_6DL_TGACv1_526303_AA1679040.1};
TRINITY_DN13769_c0_g1_i9	tr|W5G8V3|W5G8V3_WHEAT	725	3.1e-116	428.7	72.1	W5G8V3_WHEAT	Uncharacterized protein	SubName: Full=Uncharacterized protein {ECO:0000313|EnsemblPlants:TRIAE_CS42_6DL_TGACv1_526303_AA1679040.1};
TRINITY_DN13769_c1_g1_i1	tr|M8BS06|M8BS06_AEGTA	37	2.3e-08	67	37.6	M8BS06_AEGTA	Nitrate reductase (NADH)	SubName: Full=Nitrate reductase (NADH) {ECO:0000313|EMBL:EMT09604.1, ECO:0000313|EnsemblPlants:EMT09604};
TRINITY_DN13715_c0_g1_i7	tr|M8AUZ3|M8AUZ3_TRIUA	68	1e-26	129.8	19.8	M8AUZ3_TRIUA	Uncharacterized protein	SubName: Full=Uncharacterized protein {ECO:0000313|EMBL:EMS64864.1, ECO:0000313|EnsemblPlants:TRIUR3_07249-P1};
TRINITY_DN13715_c0_g1_i4	tr|M8AUZ3|M8AUZ3_TRIUA	65	6.5e-23	117.5	15.1	M8AUZ3_TRIUA	Uncharacterized protein	SubName: Full=Uncharacterized protein {ECO:0000313|EMBL:EMS64864.1, ECO:0000313|EnsemblPlants:TRIUR3_07249-P1};
TRINITY_DN13715_c0_g1_i5	tr|M8AUZ3|M8AUZ3_TRIUA	65	4.3e-23	117.5	22.4	M8AUZ3_TRIUA	Uncharacterized protein	SubName: Full=Uncharacterized protein {ECO:0000313|EMBL:EMS64864.1, ECO:0000313|EnsemblPlants:TRIUR3_07249-P1};
TRINITY_DN13715_c0_g1_i3	tr|M8AUZ3|M8AUZ3_TRIUA	86	3.9e-26	127.5	32.2	M8AUZ3_TRIUA	Uncharacterized protein	SubName: Full=Uncharacterized protein {ECO:0000313|EMBL:EMS64864.1, ECO:0000313|EnsemblPlants:TRIUR3_07249-P1};
TRINITY_DN13715_c0_g1_i6	tr|M8AUZ3|M8AUZ3_TRIUA	65	7.1e-23	117.5	13.7	M8AUZ3_TRIUA	Uncharacterized protein	SubName: Full=Uncharacterized protein {ECO:0000313|EMBL:EMS64864.1, ECO:0000313|EnsemblPlants:TRIUR3_07249-P1};
TRINITY_DN13715_c0_g1_i2	tr|M8AUZ3|M8AUZ3_TRIUA	65	2.8e-24	121.7	18.7	M8AUZ3_TRIUA	Uncharacterized protein	SubName: Full=Uncharacterized protein {ECO:0000313|EMBL:EMS64864.1, ECO:0000313|EnsemblPlants:TRIUR3_07249-P1};
TRINITY_DN13715_c0_g2_i3	tr|A0A1D6A3M8|A0A1D6A3M8_WHEAT	75	3.2e-40	174.1	31.6	A0A1D6A3M8_WHEAT	Uncharacterized protein	SubName: Full=Uncharacterized protein {ECO:0000313|EnsemblPlants:TRIAE_CS42_5DS_TGACv1_457655_AA1488630.1};
TRINITY_DN13715_c0_g2_i1	tr|A0A1D6A3M8|A0A1D6A3M8_WHEAT	75	3.1e-40	174.1	32.4	A0A1D6A3M8_WHEAT	Uncharacterized protein	SubName: Full=Uncharacterized protein {ECO:0000313|EnsemblPlants:TRIAE_CS42_5DS_TGACv1_457655_AA1488630.1};
TRINITY_DN13715_c0_g2_i4	tr|A0A1D6A3M8|A0A1D6A3M8_WHEAT	75	3.8e-40	174.1	26.9	A0A1D6A3M8_WHEAT	Uncharacterized protein	SubName: Full=Uncharacterized protein {ECO:0000313|EnsemblPlants:TRIAE_CS42_5DS_TGACv1_457655_AA1488630.1};
TRINITY_DN13715_c2_g1_i1	tr|A0A1D5ZI55|A0A1D5ZI55_WHEAT	94	5.7e-49	201.8	98.6	A0A1D5ZI55_WHEAT	Uncharacterized protein	SubName: Full=Uncharacterized protein {ECO:0000313|EnsemblPlants:TRIAE_CS42_5BS_TGACv1_424818_AA1391910.1};
TRINITY_DN13726_c0_g1_i10	tr|A0A1D5SI61|A0A1D5SI61_WHEAT	38	1e-11	79	21.9	A0A1D5SI61_WHEAT	Uncharacterized protein	SubName: Full=Uncharacterized protein {ECO:0000313|EnsemblPlants:TRIAE_CS42_1BL_TGACv1_034541_AA0144810.1};
TRINITY_DN13726_c0_g1_i12	tr|A0A1D5SI61|A0A1D5SI61_WHEAT	122	2.8e-37	164.5	45.9	A0A1D5SI61_WHEAT	Uncharacterized protein	SubName: Full=Uncharacterized protein {ECO:0000313|EnsemblPlants:TRIAE_CS42_1BL_TGACv1_034541_AA0144810.1};
TRINITY_DN13726_c0_g1_i4	tr|A0A1D5SI61|A0A1D5SI61_WHEAT	46	1.3e-12	82	24.4	A0A1D5SI61_WHEAT	Uncharacterized protein	SubName: Full=Uncharacterized protein {ECO:0000313|EnsemblPlants:TRIAE_CS42_1BL_TGACv1_034541_AA0144810.1};
TRINITY_DN13726_c0_g1_i7	tr|A0A1D6RNX2|A0A1D6RNX2_WHEAT	73	3.7e-18	100.9	24.9	A0A1D6RNX2_WHEAT	Uncharacterized protein	SubName: Full=Uncharacterized protein {ECO:0000313|EnsemblPlants:TRIAE_CS42_2DL_TGACv1_159371_AA0537320.1};
TRINITY_DN13726_c0_g1_i14	tr|A0A1D5SI61|A0A1D5SI61_WHEAT	109	1.1e-26	130.2	22.2	A0A1D5SI61_WHEAT	Uncharacterized protein	SubName: Full=Uncharacterized protein {ECO:0000313|EnsemblPlants:TRIAE_CS42_1BL_TGACv1_034541_AA0144810.1};
TRINITY_DN13726_c0_g1_i8	tr|M8BNL1|M8BNL1_AEGTA	38	1.2e-05	58.2	35.4	M8BNL1_AEGTA	Uncharacterized protein	SubName: Full=Uncharacterized protein {ECO:0000313|EMBL:EMT26590.1, ECO:0000313|EnsemblPlants:EMT26590};
TRINITY_DN13787_c0_g1_i3	tr|A0A1D5VC19|A0A1D5VC19_WHEAT	1291	0	2454.9	86.1	A0A1D5VC19_WHEAT	Uncharacterized protein	SubName: Full=Uncharacterized protein {ECO:0000313|EnsemblPlants:TRIAE_CS42_3AL_TGACv1_195551_AA0651090.2};
TRINITY_DN13787_c0_g1_i8	tr|A0A1D5VC19|A0A1D5VC19_WHEAT	1291	0	2454.9	86.8	A0A1D5VC19_WHEAT	Uncharacterized protein	SubName: Full=Uncharacterized protein {ECO:0000313|EnsemblPlants:TRIAE_CS42_3AL_TGACv1_195551_AA0651090.2};
TRINITY_DN13787_c0_g1_i2	tr|A0A1D5VC19|A0A1D5VC19_WHEAT	1291	0	2454.9	86.6	A0A1D5VC19_WHEAT	Uncharacterized protein	SubName: Full=Uncharacterized protein {ECO:0000313|EnsemblPlants:TRIAE_CS42_3AL_TGACv1_195551_AA0651090.2};
TRINITY_DN13787_c0_g1_i6	tr|A0A1D5VC19|A0A1D5VC19_WHEAT	1291	0	2454.9	92.1	A0A1D5VC19_WHEAT	Uncharacterized protein	SubName: Full=Uncharacterized protein {ECO:0000313|EnsemblPlants:TRIAE_CS42_3AL_TGACv1_195551_AA0651090.2};
TRINITY_DN13787_c0_g2_i1	tr|M7YQL2|M7YQL2_TRIUA	47	5e-14	86.3	34.9	M7YQL2_TRIUA	Sister chromatid cohesion protein PDS5-like protein A	SubName: Full=Sister chromatid cohesion protein PDS5-like protein A {ECO:0000313|EMBL:EMS52928.1, ECO:0000313|EnsemblPlants:TRIUR3_24506-P1};
TRINITY_DN13792_c0_g1_i9	tr|W5G1U2|W5G1U2_WHEAT	346	6.9e-173	615.9	67	W5G1U2_WHEAT	Uncharacterized protein	SubName: Full=Uncharacterized protein {ECO:0000313|EnsemblPlants:TRIAE_CS42_5DS_TGACv1_456831_AA1478790.2};
TRINITY_DN13792_c0_g1_i7	tr|W5G1U2|W5G1U2_WHEAT	346	5.3e-173	616.3	67	W5G1U2_WHEAT	Uncharacterized protein	SubName: Full=Uncharacterized protein {ECO:0000313|EnsemblPlants:TRIAE_CS42_5DS_TGACv1_456831_AA1478790.2};
TRINITY_DN13792_c0_g1_i6	tr|A0A1D5YWB1|A0A1D5YWB1_WHEAT	278	5.9e-130	474.2	29.7	A0A1D5YWB1_WHEAT	SAGA-associated factor 11	RecName: Full=SAGA-associated factor 11 {ECO:0000256|RuleBase:RU261113};
TRINITY_DN13792_c0_g1_i14	tr|W5F4A7|W5F4A7_WHEAT	347	3.9e-171	610.9	38.1	W5F4A7_WHEAT	Uncharacterized protein	SubName: Full=Uncharacterized protein {ECO:0000313|EnsemblPlants:TRIAE_CS42_5AS_TGACv1_395024_AA1282470.1};
TRINITY_DN13792_c0_g1_i2	tr|R7W185|R7W185_AEGTA	97	2.9e-48	201.4	26.7	R7W185_AEGTA	SAGA-associated factor 11	RecName: Full=SAGA-associated factor 11 {ECO:0000256|RuleBase:RU261113};
TRINITY_DN13792_c0_g1_i13	tr|W5F4A7|W5F4A7_WHEAT	347	3.9e-171	610.9	38.1	W5F4A7_WHEAT	Uncharacterized protein	SubName: Full=Uncharacterized protein {ECO:0000313|EnsemblPlants:TRIAE_CS42_5AS_TGACv1_395024_AA1282470.1};
TRINITY_DN13792_c0_g1_i1	tr|R7W185|R7W185_AEGTA	97	5.1e-48	201.4	15	R7W185_AEGTA	SAGA-associated factor 11	RecName: Full=SAGA-associated factor 11 {ECO:0000256|RuleBase:RU261113};
TRINITY_DN13792_c0_g1_i10	tr|W5G1U2|W5G1U2_WHEAT	221	4.4e-93	351.3	31.3	W5G1U2_WHEAT	Uncharacterized protein	SubName: Full=Uncharacterized protein {ECO:0000313|EnsemblPlants:TRIAE_CS42_5DS_TGACv1_456831_AA1478790.2};
TRINITY_DN13792_c0_g1_i8	tr|A0A1D6A1C9|A0A1D6A1C9_WHEAT	413	2e-144	522.3	41.1	A0A1D6A1C9_WHEAT	Uncharacterized protein	SubName: Full=Uncharacterized protein {ECO:0000313|EnsemblPlants:TRIAE_CS42_5DS_TGACv1_456831_AA1478790.1};
TRINITY_DN13792_c0_g1_i12	tr|W5FMV5|W5FMV5_WHEAT	53	7.7e-21	109.4	28	W5FMV5_WHEAT	Uncharacterized protein	SubName: Full=Uncharacterized protein {ECO:0000313|EnsemblPlants:TRIAE_CS42_5BS_TGACv1_423587_AA1380030.1};
TRINITY_DN13754_c0_g1_i1	tr|A0A287JDJ7|A0A287JDJ7_HORVV	26	0.00011	54.3	35.3	A0A287JDJ7_HORVV	Uncharacterized protein	SubName: Full=Uncharacterized protein {ECO:0000313|EnsemblPlants:HORVU2Hr1G108150.5};
TRINITY_DN13754_c0_g2_i4	tr|A0A1D5T9L9|A0A1D5T9L9_WHEAT	75	1.4e-33	152.1	30.2	A0A1D5T9L9_WHEAT	Uncharacterized protein	SubName: Full=Uncharacterized protein {ECO:0000313|EnsemblPlants:TRIAE_CS42_2AL_TGACv1_093846_AA0288050.4};
TRINITY_DN13754_c0_g2_i2	tr|A0A1D5T9L9|A0A1D5T9L9_WHEAT	75	1.2e-33	152.1	34.5	A0A1D5T9L9_WHEAT	Uncharacterized protein	SubName: Full=Uncharacterized protein {ECO:0000313|EnsemblPlants:TRIAE_CS42_2AL_TGACv1_093846_AA0288050.4};
TRINITY_DN13754_c0_g2_i1	tr|A0A1D5T9L9|A0A1D5T9L9_WHEAT	75	1.3e-33	152.1	32	A0A1D5T9L9_WHEAT	Uncharacterized protein	SubName: Full=Uncharacterized protein {ECO:0000313|EnsemblPlants:TRIAE_CS42_2AL_TGACv1_093846_AA0288050.4};
TRINITY_DN13754_c0_g2_i3	tr|A0A1D5T9L9|A0A1D5T9L9_WHEAT	75	9.6e-34	152.1	42.8	A0A1D5T9L9_WHEAT	Uncharacterized protein	SubName: Full=Uncharacterized protein {ECO:0000313|EnsemblPlants:TRIAE_CS42_2AL_TGACv1_093846_AA0288050.4};
TRINITY_DN13754_c0_g3_i2	tr|A0A1D5W3B2|A0A1D5W3B2_WHEAT	141	3.8e-73	282.7	99.5	A0A1D5W3B2_WHEAT	Uncharacterized protein	SubName: Full=Uncharacterized protein {ECO:0000313|EnsemblPlants:TRIAE_CS42_3B_TGACv1_223791_AA0787340.3};
TRINITY_DN13754_c0_g3_i1	tr|A0A1D5WX55|A0A1D5WX55_WHEAT	181	1.2e-98	367.9	99.6	A0A1D5WX55_WHEAT	Uncharacterized protein	SubName: Full=Uncharacterized protein {ECO:0000313|EnsemblPlants:TRIAE_CS42_3DS_TGACv1_274262_AA0935230.1};
TRINITY_DN13782_c0_g1_i12	tr|W5BEB7|W5BEB7_WHEAT	263	5.1e-125	456.4	70.4	W5BEB7_WHEAT	Uncharacterized protein	SubName: Full=Uncharacterized protein {ECO:0000313|EnsemblPlants:TRIAE_CS42_2BL_TGACv1_133947_AA0443470.1};
TRINITY_DN13782_c0_g1_i11	tr|W5BEB7|W5BEB7_WHEAT	263	5.1e-125	456.4	69.9	W5BEB7_WHEAT	Uncharacterized protein	SubName: Full=Uncharacterized protein {ECO:0000313|EnsemblPlants:TRIAE_CS42_2BL_TGACv1_133947_AA0443470.1};
TRINITY_DN13782_c0_g1_i7	tr|W5BEB7|W5BEB7_WHEAT	263	3.9e-125	456.8	70.4	W5BEB7_WHEAT	Uncharacterized protein	SubName: Full=Uncharacterized protein {ECO:0000313|EnsemblPlants:TRIAE_CS42_2BL_TGACv1_133947_AA0443470.1};
TRINITY_DN13782_c0_g1_i9	tr|A0A1D5UIZ4|A0A1D5UIZ4_WHEAT	233	2.5e-124	453.8	81.9	A0A1D5UIZ4_WHEAT	Uncharacterized protein	SubName: Full=Uncharacterized protein {ECO:0000313|EnsemblPlants:TRIAE_CS42_2DL_TGACv1_158388_AA0517230.2};
TRINITY_DN13782_c0_g1_i6	tr|N1R5I0|N1R5I0_AEGTA	270	2.6e-124	453.8	90	N1R5I0_AEGTA	Germin-like protein 4-1	SubName: Full=Germin-like protein 4-1 {ECO:0000313|EMBL:EMT33772.1, ECO:0000313|EnsemblPlants:EMT33772};
TRINITY_DN13782_c0_g1_i4	tr|W5AY31|W5AY31_WHEAT	149	5.9e-76	292.4	85.5	W5AY31_WHEAT	Uncharacterized protein	SubName: Full=Uncharacterized protein {ECO:0000313|EnsemblPlants:TRIAE_CS42_2AL_TGACv1_094606_AA0300340.1};
TRINITY_DN13782_c0_g1_i5	tr|W5BEB7|W5BEB7_WHEAT	263	5.1e-125	456.4	70.4	W5BEB7_WHEAT	Uncharacterized protein	SubName: Full=Uncharacterized protein {ECO:0000313|EnsemblPlants:TRIAE_CS42_2BL_TGACv1_133947_AA0443470.1};
TRINITY_DN13782_c0_g1_i8	tr|W5BEB7|W5BEB7_WHEAT	186	1.9e-97	364	88	W5BEB7_WHEAT	Uncharacterized protein	SubName: Full=Uncharacterized protein {ECO:0000313|EnsemblPlants:TRIAE_CS42_2BL_TGACv1_133947_AA0443470.1};
TRINITY_DN13782_c0_g1_i3	tr|W5BEB7|W5BEB7_WHEAT	149	1e-75	291.6	84.3	W5BEB7_WHEAT	Uncharacterized protein	SubName: Full=Uncharacterized protein {ECO:0000313|EnsemblPlants:TRIAE_CS42_2BL_TGACv1_133947_AA0443470.1};
TRINITY_DN13782_c0_g1_i13	tr|N1R5I0|N1R5I0_AEGTA	270	9e-125	455.3	90.7	N1R5I0_AEGTA	Germin-like protein 4-1	SubName: Full=Germin-like protein 4-1 {ECO:0000313|EMBL:EMT33772.1, ECO:0000313|EnsemblPlants:EMT33772};
TRINITY_DN13772_c0_g1_i1	tr|A0A1D5TNM9|A0A1D5TNM9_WHEAT	69	4e-31	142.1	96.7	A0A1D5TNM9_WHEAT	Elongation factor 1-alpha	RecName: Full=Elongation factor 1-alpha {ECO:0000256|RuleBase:RU000325};
TRINITY_DN13757_c0_g1_i1	tr|A0A1D6CEZ1|A0A1D6CEZ1_WHEAT	94	2.7e-46	194.1	44.3	A0A1D6CEZ1_WHEAT	Uncharacterized protein	SubName: Full=Uncharacterized protein {ECO:0000313|EnsemblPlants:TRIAE_CS42_7BS_TGACv1_592083_AA1930160.3};
TRINITY_DN13757_c0_g1_i2	tr|A0A1D6CEZ1|A0A1D6CEZ1_WHEAT	94	2.6e-46	194.1	45.9	A0A1D6CEZ1_WHEAT	Uncharacterized protein	SubName: Full=Uncharacterized protein {ECO:0000313|EnsemblPlants:TRIAE_CS42_7BS_TGACv1_592083_AA1930160.3};
TRINITY_DN13757_c0_g2_i1	tr|W5FFU8|W5FFU8_WHEAT	104	1.8e-34	154.8	47.9	W5FFU8_WHEAT	Uncharacterized protein	SubName: Full=Uncharacterized protein {ECO:0000313|EnsemblPlants:TRIAE_CS42_5BL_TGACv1_404819_AA1311770.1};
TRINITY_DN13757_c0_g2_i2	tr|A0A1D5ZUK9|A0A1D5ZUK9_WHEAT	101	5.3e-34	153.3	47.2	A0A1D5ZUK9_WHEAT	Uncharacterized protein	SubName: Full=Uncharacterized protein {ECO:0000313|EnsemblPlants:TRIAE_CS42_5DL_TGACv1_435087_AA1445820.1};
TRINITY_DN13730_c0_g1_i4	tr|A0A1D5Y8K1|A0A1D5Y8K1_WHEAT	110	9.9e-55	221.9	62.7	A0A1D5Y8K1_WHEAT	Uncharacterized protein	SubName: Full=Uncharacterized protein {ECO:0000313|EnsemblPlants:TRIAE_CS42_4DS_TGACv1_361977_AA1175140.6};
TRINITY_DN13730_c0_g1_i2	tr|A0A1D5Y8K1|A0A1D5Y8K1_WHEAT	144	4.4e-77	295.8	99.8	A0A1D5Y8K1_WHEAT	Uncharacterized protein	SubName: Full=Uncharacterized protein {ECO:0000313|EnsemblPlants:TRIAE_CS42_4DS_TGACv1_361977_AA1175140.6};
TRINITY_DN13730_c0_g1_i3	tr|A0A1D5Y8K1|A0A1D5Y8K1_WHEAT	75	1.7e-33	150.6	69.4	A0A1D5Y8K1_WHEAT	Uncharacterized protein	SubName: Full=Uncharacterized protein {ECO:0000313|EnsemblPlants:TRIAE_CS42_4DS_TGACv1_361977_AA1175140.6};
TRINITY_DN13730_c1_g1_i1	tr|A0A1D5ZN11|A0A1D5ZN11_WHEAT	67	3.1e-33	149.1	99.5	A0A1D5ZN11_WHEAT	Uncharacterized protein	SubName: Full=Uncharacterized protein {ECO:0000313|EnsemblPlants:TRIAE_CS42_5DL_TGACv1_433566_AA1416280.8};
TRINITY_DN13703_c0_g1_i6	tr|A0A1D6DHV2|A0A1D6DHV2_WHEAT	1329	0	1759.6	31.5	A0A1D6DHV2_WHEAT	Uncharacterized protein	SubName: Full=Uncharacterized protein {ECO:0000313|EnsemblPlants:TRIAE_CS42_U_TGACv1_643114_AA2127460.1};
TRINITY_DN13703_c0_g1_i3	tr|A0A1D6DHV2|A0A1D6DHV2_WHEAT	1448	0	1911	34.3	A0A1D6DHV2_WHEAT	Uncharacterized protein	SubName: Full=Uncharacterized protein {ECO:0000313|EnsemblPlants:TRIAE_CS42_U_TGACv1_643114_AA2127460.1};
TRINITY_DN13703_c0_g1_i2	tr|A0A1D6DHV2|A0A1D6DHV2_WHEAT	1329	0	1760	34.3	A0A1D6DHV2_WHEAT	Uncharacterized protein	SubName: Full=Uncharacterized protein {ECO:0000313|EnsemblPlants:TRIAE_CS42_U_TGACv1_643114_AA2127460.1};
TRINITY_DN13703_c0_g1_i5	tr|A0A1D6DHV2|A0A1D6DHV2_WHEAT	1448	0	1911	34.4	A0A1D6DHV2_WHEAT	Uncharacterized protein	SubName: Full=Uncharacterized protein {ECO:0000313|EnsemblPlants:TRIAE_CS42_U_TGACv1_643114_AA2127460.1};
TRINITY_DN13703_c0_g1_i4	tr|A0A1D6DHV2|A0A1D6DHV2_WHEAT	1318	0	1756.1	87	A0A1D6DHV2_WHEAT	Uncharacterized protein	SubName: Full=Uncharacterized protein {ECO:0000313|EnsemblPlants:TRIAE_CS42_U_TGACv1_643114_AA2127460.1};
TRINITY_DN13703_c0_g1_i7	tr|A0A1D6DHV2|A0A1D6DHV2_WHEAT	1335	0	1779.2	87.1	A0A1D6DHV2_WHEAT	Uncharacterized protein	SubName: Full=Uncharacterized protein {ECO:0000313|EnsemblPlants:TRIAE_CS42_U_TGACv1_643114_AA2127460.1};
TRINITY_DN13703_c0_g2_i1	tr|A0A1D6DL98|A0A1D6DL98_WHEAT	254	3.7e-119	437.2	56.8	A0A1D6DL98_WHEAT	Uncharacterized protein	SubName: Full=Uncharacterized protein {ECO:0000313|EnsemblPlants:TRIAE_CS42_U_TGACv1_645886_AA2145630.1};
TRINITY_DN13703_c0_g2_i2	tr|A0A1D6DL98|A0A1D6DL98_WHEAT	354	5.5e-203	715.7	80.2	A0A1D6DL98_WHEAT	Uncharacterized protein	SubName: Full=Uncharacterized protein {ECO:0000313|EnsemblPlants:TRIAE_CS42_U_TGACv1_645886_AA2145630.1};
TRINITY_DN13783_c0_g2_i2	tr|A0A1D5XNG4|A0A1D5XNG4_WHEAT	585	1e-310	1073.9	97.4	A0A1D5XNG4_WHEAT	Adenylosuccinate lyase; ASL; Adenylosuccinase	RecName: Full=Adenylosuccinate lyase {ECO:0000256|RuleBase:RU361172}; Short=ASL {ECO:0000256|RuleBase:RU361172}; EC=4.3.2.2 {ECO:0000256|RuleBase:RU361172}; AltName: Full=Adenylosuccinase {ECO:0000256|RuleBase:RU361172};
TRINITY_DN13783_c0_g2_i3	tr|A0A1D5XNG4|A0A1D5XNG4_WHEAT	585	1.3e-310	1073.9	77.7	A0A1D5XNG4_WHEAT	Adenylosuccinate lyase; ASL; Adenylosuccinase	RecName: Full=Adenylosuccinate lyase {ECO:0000256|RuleBase:RU361172}; Short=ASL {ECO:0000256|RuleBase:RU361172}; EC=4.3.2.2 {ECO:0000256|RuleBase:RU361172}; AltName: Full=Adenylosuccinase {ECO:0000256|RuleBase:RU361172};
TRINITY_DN13783_c0_g2_i4	tr|A0A1D5XNG4|A0A1D5XNG4_WHEAT	585	1.3e-310	1073.9	77.7	A0A1D5XNG4_WHEAT	Adenylosuccinate lyase; ASL; Adenylosuccinase	RecName: Full=Adenylosuccinate lyase {ECO:0000256|RuleBase:RU361172}; Short=ASL {ECO:0000256|RuleBase:RU361172}; EC=4.3.2.2 {ECO:0000256|RuleBase:RU361172}; AltName: Full=Adenylosuccinase {ECO:0000256|RuleBase:RU361172};
TRINITY_DN13783_c0_g2_i1	tr|A0A1D5XNG4|A0A1D5XNG4_WHEAT	585	8.4e-310	1071.2	83	A0A1D5XNG4_WHEAT	Adenylosuccinate lyase; ASL; Adenylosuccinase	RecName: Full=Adenylosuccinate lyase {ECO:0000256|RuleBase:RU361172}; Short=ASL {ECO:0000256|RuleBase:RU361172}; EC=4.3.2.2 {ECO:0000256|RuleBase:RU361172}; AltName: Full=Adenylosuccinase {ECO:0000256|RuleBase:RU361172};
TRINITY_DN13705_c0_g1_i1	tr|M8BNP0|M8BNP0_AEGTA	158	7.8e-89	335.9	54.5	M8BNP0_AEGTA	Uncharacterized protein	SubName: Full=Uncharacterized protein {ECO:0000313|EMBL:EMT04602.1, ECO:0000313|EnsemblPlants:EMT04602};
TRINITY_DN13705_c0_g1_i2	tr|M8BNP0|M8BNP0_AEGTA	158	4.7e-88	333.2	58.8	M8BNP0_AEGTA	Uncharacterized protein	SubName: Full=Uncharacterized protein {ECO:0000313|EMBL:EMT04602.1, ECO:0000313|EnsemblPlants:EMT04602};
TRINITY_DN13705_c0_g1_i3	tr|A0A1D5YUG0|A0A1D5YUG0_WHEAT	153	6.1e-87	329.3	63.2	A0A1D5YUG0_WHEAT	Uncharacterized protein	SubName: Full=Uncharacterized protein {ECO:0000313|EnsemblPlants:TRIAE_CS42_5AS_TGACv1_393516_AA1273500.1};
TRINITY_DN13705_c0_g2_i1	tr|A0A1D5YVI4|A0A1D5YVI4_WHEAT	171	2.9e-94	353.6	73.6	A0A1D5YVI4_WHEAT	Uncharacterized protein	SubName: Full=Uncharacterized protein {ECO:0000313|EnsemblPlants:TRIAE_CS42_5AS_TGACv1_394179_AA1278610.1};
TRINITY_DN13705_c0_g2_i2	tr|Q41584|Q41584_WHEAT	176	1.5e-100	374.8	60.4	Q41584_WHEAT	Thaumatin-like protein	SubName: Full=Thaumatin-like protein {ECO:0000313|EMBL:CAA66278.1};
TRINITY_DN13705_c0_g2_i4	tr|A0A1D5YVI4|A0A1D5YVI4_WHEAT	171	4.2e-94	353.2	66.5	A0A1D5YVI4_WHEAT	Uncharacterized protein	SubName: Full=Uncharacterized protein {ECO:0000313|EnsemblPlants:TRIAE_CS42_5AS_TGACv1_394179_AA1278610.1};
TRINITY_DN13705_c0_g2_i3	tr|A0A1D5YVI4|A0A1D5YVI4_WHEAT	165	1.1e-78	302	66.1	A0A1D5YVI4_WHEAT	Uncharacterized protein	SubName: Full=Uncharacterized protein {ECO:0000313|EnsemblPlants:TRIAE_CS42_5AS_TGACv1_394179_AA1278610.1};
TRINITY_DN13705_c0_g3_i1	tr|M8AU57|M8AU57_TRIUA	67	7.4e-28	131.3	90.1	M8AU57_TRIUA	Thaumatin-like protein	SubName: Full=Thaumatin-like protein {ECO:0000313|EMBL:EMS68775.1, ECO:0000313|EnsemblPlants:TRIUR3_20725-P1};
TRINITY_DN13784_c0_g1_i1	tr|A0A287JWA2|A0A287JWA2_HORVV	29	4.7e-06	58.9	38.5	A0A287JWA2_HORVV	Uncharacterized protein	SubName: Full=Uncharacterized protein {ECO:0000313|EnsemblPlants:HORVU3Hr1G001040.3};
TRINITY_DN13712_c0_g1_i1	tr|A0A1D5UMH7|A0A1D5UMH7_WHEAT	407	2e-193	684.1	82.1	A0A1D5UMH7_WHEAT	Uncharacterized protein	SubName: Full=Uncharacterized protein {ECO:0000313|EnsemblPlants:TRIAE_CS42_2DL_TGACv1_159152_AA0533450.1};
TRINITY_DN13712_c0_g1_i2	tr|A0A1D5UMH7|A0A1D5UMH7_WHEAT	407	2e-193	684.1	83.5	A0A1D5UMH7_WHEAT	Uncharacterized protein	SubName: Full=Uncharacterized protein {ECO:0000313|EnsemblPlants:TRIAE_CS42_2DL_TGACv1_159152_AA0533450.1};
TRINITY_DN13759_c0_g1_i2	tr|A0A1D5ZTL7|A0A1D5ZTL7_WHEAT	35	8.8e-09	70.1	10.8	A0A1D5ZTL7_WHEAT	Uncharacterized protein	SubName: Full=Uncharacterized protein {ECO:0000313|EnsemblPlants:TRIAE_CS42_5DL_TGACv1_434775_AA1441450.2};
TRINITY_DN13759_c0_g1_i4	tr|A0A1D5ZTL7|A0A1D5ZTL7_WHEAT	36	1.8e-09	72.4	11.2	A0A1D5ZTL7_WHEAT	Uncharacterized protein	SubName: Full=Uncharacterized protein {ECO:0000313|EnsemblPlants:TRIAE_CS42_5DL_TGACv1_434775_AA1441450.2};
TRINITY_DN13759_c0_g1_i1	tr|A0A1D5ZTL7|A0A1D5ZTL7_WHEAT	35	8.6e-09	70.1	11.1	A0A1D5ZTL7_WHEAT	Uncharacterized protein	SubName: Full=Uncharacterized protein {ECO:0000313|EnsemblPlants:TRIAE_CS42_5DL_TGACv1_434775_AA1441450.2};
TRINITY_DN13759_c0_g1_i3	tr|A0A1D5ZTL7|A0A1D5ZTL7_WHEAT	35	6.6e-09	70.5	11.1	A0A1D5ZTL7_WHEAT	Uncharacterized protein	SubName: Full=Uncharacterized protein {ECO:0000313|EnsemblPlants:TRIAE_CS42_5DL_TGACv1_434775_AA1441450.2};
TRINITY_DN13708_c0_g1_i1	tr|A0A1D6SA78|A0A1D6SA78_WHEAT	27	3.3e-06	59.7	30.2	A0A1D6SA78_WHEAT	ER molecular chaperone	SubName: Full=ER molecular chaperone {ECO:0000313|EnsemblPlants:TRIAE_CS42_6BS_TGACv1_513178_AA1633090.2};
TRINITY_DN13735_c0_g1_i11	tr|I1GMS5|I1GMS5_BRADI	112	3.6e-54	220.7	38.7	I1GMS5_BRADI	Uncharacterized protein	SubName: Full=Uncharacterized protein {ECO:0000313|EnsemblPlants:BRADI1G07080.1};
TRINITY_DN13735_c0_g1_i6	tr|A0A287SGW6|A0A287SGW6_HORVV	183	3.3e-40	174.5	57.4	A0A287SGW6_HORVV	Uncharacterized protein	SubName: Full=Uncharacterized protein {ECO:0000313|EnsemblPlants:HORVU5Hr1G099070.2};
TRINITY_DN13735_c0_g1_i8	tr|A0A287SGZ7|A0A287SGZ7_HORVV	217	7.9e-60	240	54.5	A0A287SGZ7_HORVV	Uncharacterized protein	SubName: Full=Uncharacterized protein {ECO:0000313|EnsemblPlants:HORVU5Hr1G099070.1};
TRINITY_DN13735_c0_g1_i3	tr|A0A287SGZ7|A0A287SGZ7_HORVV	177	1.6e-30	143.3	27.3	A0A287SGZ7_HORVV	Uncharacterized protein	SubName: Full=Uncharacterized protein {ECO:0000313|EnsemblPlants:HORVU5Hr1G099070.1};
TRINITY_DN13735_c0_g1_i4	tr|A0A287SGZ7|A0A287SGZ7_HORVV	70	3.8e-31	142.9	60.7	A0A287SGZ7_HORVV	Uncharacterized protein	SubName: Full=Uncharacterized protein {ECO:0000313|EnsemblPlants:HORVU5Hr1G099070.1};
TRINITY_DN13735_c0_g1_i9	tr|A0A287SGZ7|A0A287SGZ7_HORVV	177	1.3e-30	143.3	35.5	A0A287SGZ7_HORVV	Uncharacterized protein	SubName: Full=Uncharacterized protein {ECO:0000313|EnsemblPlants:HORVU5Hr1G099070.1};
TRINITY_DN13735_c0_g1_i7	tr|M8BRD6|M8BRD6_AEGTA	37	7.8e-12	80.1	12.6	M8BRD6_AEGTA	Uncharacterized protein	SubName: Full=Uncharacterized protein {ECO:0000313|EMBL:EMT09319.1, ECO:0000313|EnsemblPlants:EMT09319};
TRINITY_DN13735_c0_g1_i10	tr|A0A287SGZ7|A0A287SGZ7_HORVV	177	1.5e-30	143.3	30.8	A0A287SGZ7_HORVV	Uncharacterized protein	SubName: Full=Uncharacterized protein {ECO:0000313|EnsemblPlants:HORVU5Hr1G099070.1};
TRINITY_DN13735_c0_g1_i2	tr|A0A287SGZ7|A0A287SGZ7_HORVV	217	3.2e-60	241.1	60.9	A0A287SGZ7_HORVV	Uncharacterized protein	SubName: Full=Uncharacterized protein {ECO:0000313|EnsemblPlants:HORVU5Hr1G099070.1};
TRINITY_DN13735_c0_g1_i5	tr|I1GMS5|I1GMS5_BRADI	112	3.8e-54	220.7	37.3	I1GMS5_BRADI	Uncharacterized protein	SubName: Full=Uncharacterized protein {ECO:0000313|EnsemblPlants:BRADI1G07080.1};
TRINITY_DN13735_c0_g1_i12	tr|A0A287SGZ7|A0A287SGZ7_HORVV	217	3.1e-60	241.1	62.9	A0A287SGZ7_HORVV	Uncharacterized protein	SubName: Full=Uncharacterized protein {ECO:0000313|EnsemblPlants:HORVU5Hr1G099070.1};
TRINITY_DN13735_c0_g1_i1	tr|M8BRD6|M8BRD6_AEGTA	148	9.1e-22	113.2	45.9	M8BRD6_AEGTA	Uncharacterized protein	SubName: Full=Uncharacterized protein {ECO:0000313|EMBL:EMT09319.1, ECO:0000313|EnsemblPlants:EMT09319};
TRINITY_DN13764_c0_g1_i2	tr|A0A1D5XIC7|A0A1D5XIC7_WHEAT	413	2.1e-246	860.1	81.8	A0A1D5XIC7_WHEAT	Uncharacterized protein	SubName: Full=Uncharacterized protein {ECO:0000313|EnsemblPlants:TRIAE_CS42_4BL_TGACv1_320775_AA1048430.1};
TRINITY_DN13764_c1_g2_i3	tr|N1R0Y8|N1R0Y8_AEGTA	46	8.3e-06	60.5	12.1	N1R0Y8_AEGTA	Nuclear transcription factor Y subunit A-7	SubName: Full=Nuclear transcription factor Y subunit A-7 {ECO:0000313|EMBL:EMT15779.1, ECO:0000313|EnsemblPlants:EMT15779};
TRINITY_DN13764_c3_g1_i1	tr|A0A1D5WEC4|A0A1D5WEC4_WHEAT	40	0.00016	55.8	13.2	A0A1D5WEC4_WHEAT	Uncharacterized protein	SubName: Full=Uncharacterized protein {ECO:0000313|EnsemblPlants:TRIAE_CS42_3DL_TGACv1_249346_AA0846120.1};
TRINITY_DN13762_c0_g1_i2	tr|W5BLR2|W5BLR2_WHEAT	265	1.8e-143	518.1	57.1	W5BLR2_WHEAT	Uncharacterized protein	SubName: Full=Uncharacterized protein {ECO:0000313|EnsemblPlants:TRIAE_CS42_2BS_TGACv1_146993_AA0476330.1};
TRINITY_DN13762_c0_g1_i3	tr|W5BLR2|W5BLR2_WHEAT	265	1.5e-143	518.1	66.7	W5BLR2_WHEAT	Uncharacterized protein	SubName: Full=Uncharacterized protein {ECO:0000313|EnsemblPlants:TRIAE_CS42_2BS_TGACv1_146993_AA0476330.1};
TRINITY_DN13762_c0_g1_i1	tr|W5BLR2|W5BLR2_WHEAT	308	8.4e-173	615.1	84.4	W5BLR2_WHEAT	Uncharacterized protein	SubName: Full=Uncharacterized protein {ECO:0000313|EnsemblPlants:TRIAE_CS42_2BS_TGACv1_146993_AA0476330.1};
TRINITY_DN13778_c0_g1_i10	tr|A0A1D5UK86|A0A1D5UK86_WHEAT	425	4.2e-228	800	50.5	A0A1D5UK86_WHEAT	Formin-like protein	RecName: Full=Formin-like protein {ECO:0000256|RuleBase:RU361260};
TRINITY_DN13778_c0_g1_i4	tr|A0A1D5UK86|A0A1D5UK86_WHEAT	380	2.4e-204	721.1	46.8	A0A1D5UK86_WHEAT	Formin-like protein	RecName: Full=Formin-like protein {ECO:0000256|RuleBase:RU361260};
TRINITY_DN13778_c0_g1_i11	tr|A0A1D5UK86|A0A1D5UK86_WHEAT	185	2.2e-68	268.5	43.7	A0A1D5UK86_WHEAT	Formin-like protein	RecName: Full=Formin-like protein {ECO:0000256|RuleBase:RU361260};
TRINITY_DN13778_c0_g1_i12	tr|A0A1D5UK86|A0A1D5UK86_WHEAT	424	1.5e-227	798.1	52.4	A0A1D5UK86_WHEAT	Formin-like protein	RecName: Full=Formin-like protein {ECO:0000256|RuleBase:RU361260};
TRINITY_DN13778_c0_g1_i9	tr|A0A1D5UK86|A0A1D5UK86_WHEAT	424	5.9e-227	796.2	52.4	A0A1D5UK86_WHEAT	Formin-like protein	RecName: Full=Formin-like protein {ECO:0000256|RuleBase:RU361260};
TRINITY_DN13778_c0_g1_i8	tr|A0A1D5UK86|A0A1D5UK86_WHEAT	274	1.1e-144	523.1	30.8	A0A1D5UK86_WHEAT	Formin-like protein	RecName: Full=Formin-like protein {ECO:0000256|RuleBase:RU361260};
TRINITY_DN13778_c0_g1_i6	tr|A0A1D5UK86|A0A1D5UK86_WHEAT	425	2.1e-227	797.7	50.5	A0A1D5UK86_WHEAT	Formin-like protein	RecName: Full=Formin-like protein {ECO:0000256|RuleBase:RU361260};
TRINITY_DN13778_c0_g1_i1	tr|A0A1D5UK86|A0A1D5UK86_WHEAT	273	3e-144	521.5	31.8	A0A1D5UK86_WHEAT	Formin-like protein	RecName: Full=Formin-like protein {ECO:0000256|RuleBase:RU361260};
TRINITY_DN13778_c0_g1_i3	tr|A0A1D5UK86|A0A1D5UK86_WHEAT	381	1e-204	722.6	38.5	A0A1D5UK86_WHEAT	Formin-like protein	RecName: Full=Formin-like protein {ECO:0000256|RuleBase:RU361260};
TRINITY_DN13778_c0_g1_i5	tr|M8CBF8|M8CBF8_AEGTA	152	1.8e-72	282	38.8	M8CBF8_AEGTA	Formin-like protein	RecName: Full=Formin-like protein {ECO:0000256|RuleBase:RU361260};
TRINITY_DN13778_c0_g1_i2	tr|A0A1D5UK86|A0A1D5UK86_WHEAT	380	2.8e-204	721.1	39.7	A0A1D5UK86_WHEAT	Formin-like protein	RecName: Full=Formin-like protein {ECO:0000256|RuleBase:RU361260};
TRINITY_DN13740_c0_g2_i1	tr|A0A1D5YJZ5|A0A1D5YJZ5_WHEAT	35	1.1e-06	60.8	52	A0A1D5YJZ5_WHEAT	Uncharacterized protein	SubName: Full=Uncharacterized protein {ECO:0000313|EnsemblPlants:TRIAE_CS42_5AL_TGACv1_375712_AA1226040.1};
TRINITY_DN13740_c0_g1_i6	tr|A0A1D5YJZ5|A0A1D5YJZ5_WHEAT	105	2.5e-46	194.9	30.7	A0A1D5YJZ5_WHEAT	Uncharacterized protein	SubName: Full=Uncharacterized protein {ECO:0000313|EnsemblPlants:TRIAE_CS42_5AL_TGACv1_375712_AA1226040.1};
TRINITY_DN13740_c0_g1_i4	tr|A0A077S6R1|A0A077S6R1_WHEAT	43	2.2e-08	67.8	26.3	A0A077S6R1_WHEAT	Uncharacterized protein	SubName: Full=Uncharacterized protein {ECO:0000313|EMBL:CDM85591.1};
TRINITY_DN13740_c0_g1_i5	tr|A0A1D5YJZ5|A0A1D5YJZ5_WHEAT	97	5.9e-40	173.7	28.9	A0A1D5YJZ5_WHEAT	Uncharacterized protein	SubName: Full=Uncharacterized protein {ECO:0000313|EnsemblPlants:TRIAE_CS42_5AL_TGACv1_375712_AA1226040.1};
TRINITY_DN13740_c0_g1_i8	tr|A0A1D5YJZ5|A0A1D5YJZ5_WHEAT	143	6e-64	253.8	31.9	A0A1D5YJZ5_WHEAT	Uncharacterized protein	SubName: Full=Uncharacterized protein {ECO:0000313|EnsemblPlants:TRIAE_CS42_5AL_TGACv1_375712_AA1226040.1};
TRINITY_DN13740_c0_g1_i3	tr|A0A1D5YJZ5|A0A1D5YJZ5_WHEAT	62	2.8e-24	120.2	51.5	A0A1D5YJZ5_WHEAT	Uncharacterized protein	SubName: Full=Uncharacterized protein {ECO:0000313|EnsemblPlants:TRIAE_CS42_5AL_TGACv1_375712_AA1226040.1};
TRINITY_DN13740_c0_g1_i7	tr|A0A1D5YJZ5|A0A1D5YJZ5_WHEAT	97	7e-40	173.7	24.3	A0A1D5YJZ5_WHEAT	Uncharacterized protein	SubName: Full=Uncharacterized protein {ECO:0000313|EnsemblPlants:TRIAE_CS42_5AL_TGACv1_375712_AA1226040.1};
TRINITY_DN13789_c0_g1_i5	tr|A0A1D5TJ24|A0A1D5TJ24_WHEAT	223	1.4e-90	342	57.1	A0A1D5TJ24_WHEAT	Uncharacterized protein	SubName: Full=Uncharacterized protein {ECO:0000313|EnsemblPlants:TRIAE_CS42_2AS_TGACv1_112204_AA0333250.1};
TRINITY_DN13789_c0_g1_i6	tr|M8BLQ7|M8BLQ7_AEGTA	40	5e-09	70.1	21.9	M8BLQ7_AEGTA	Uncharacterized protein	SubName: Full=Uncharacterized protein {ECO:0000313|EMBL:EMT03947.1, ECO:0000313|EnsemblPlants:EMT03947};
TRINITY_DN13789_c0_g1_i7	tr|A0A1D5TJ25|A0A1D5TJ25_WHEAT	190	8.7e-85	322.4	66.1	A0A1D5TJ25_WHEAT	Uncharacterized protein	SubName: Full=Uncharacterized protein {ECO:0000313|EnsemblPlants:TRIAE_CS42_2AS_TGACv1_112204_AA0333250.2};
TRINITY_DN13789_c0_g1_i4	tr|A0A1D5TJ25|A0A1D5TJ25_WHEAT	186	7.2e-78	298.9	92.3	A0A1D5TJ25_WHEAT	Uncharacterized protein	SubName: Full=Uncharacterized protein {ECO:0000313|EnsemblPlants:TRIAE_CS42_2AS_TGACv1_112204_AA0333250.2};
TRINITY_DN13789_c0_g1_i1	tr|A0A1D5TJ24|A0A1D5TJ24_WHEAT	223	7.1e-92	346.3	61.7	A0A1D5TJ24_WHEAT	Uncharacterized protein	SubName: Full=Uncharacterized protein {ECO:0000313|EnsemblPlants:TRIAE_CS42_2AS_TGACv1_112204_AA0333250.1};
TRINITY_DN13789_c0_g1_i3	tr|A0A1D5TJ24|A0A1D5TJ24_WHEAT	223	8.1e-92	346.3	54.2	A0A1D5TJ24_WHEAT	Uncharacterized protein	SubName: Full=Uncharacterized protein {ECO:0000313|EnsemblPlants:TRIAE_CS42_2AS_TGACv1_112204_AA0333250.1};
TRINITY_DN13706_c0_g1_i9	tr|A0A1D5ZZN2|A0A1D5ZZN2_WHEAT	415	1e-220	775	71.7	A0A1D5ZZN2_WHEAT	Uncharacterized protein	SubName: Full=Uncharacterized protein {ECO:0000313|EnsemblPlants:TRIAE_CS42_5DL_TGACv1_438081_AA1467900.1};
TRINITY_DN13706_c0_g1_i3	tr|A0A1D5ZZN2|A0A1D5ZZN2_WHEAT	415	7.6e-220	772.3	61.3	A0A1D5ZZN2_WHEAT	Uncharacterized protein	SubName: Full=Uncharacterized protein {ECO:0000313|EnsemblPlants:TRIAE_CS42_5DL_TGACv1_438081_AA1467900.1};
TRINITY_DN13706_c0_g1_i2	tr|A0A1D5ZZN2|A0A1D5ZZN2_WHEAT	415	8.9e-220	772.3	52	A0A1D5ZZN2_WHEAT	Uncharacterized protein	SubName: Full=Uncharacterized protein {ECO:0000313|EnsemblPlants:TRIAE_CS42_5DL_TGACv1_438081_AA1467900.1};
TRINITY_DN13706_c0_g1_i8	tr|A0A1D5ZZN2|A0A1D5ZZN2_WHEAT	466	5.6e-213	749.6	64.3	A0A1D5ZZN2_WHEAT	Uncharacterized protein	SubName: Full=Uncharacterized protein {ECO:0000313|EnsemblPlants:TRIAE_CS42_5DL_TGACv1_438081_AA1467900.1};
TRINITY_DN13706_c0_g1_i10	tr|A0A1D5ZZN2|A0A1D5ZZN2_WHEAT	415	7.6e-220	772.3	61.3	A0A1D5ZZN2_WHEAT	Uncharacterized protein	SubName: Full=Uncharacterized protein {ECO:0000313|EnsemblPlants:TRIAE_CS42_5DL_TGACv1_438081_AA1467900.1};
TRINITY_DN13706_c0_g1_i1	tr|A0A1D5ZZN2|A0A1D5ZZN2_WHEAT	415	8.4e-222	778.5	77	A0A1D5ZZN2_WHEAT	Uncharacterized protein	SubName: Full=Uncharacterized protein {ECO:0000313|EnsemblPlants:TRIAE_CS42_5DL_TGACv1_438081_AA1467900.1};
TRINITY_DN13706_c0_g1_i5	tr|A0A1D5ZZN2|A0A1D5ZZN2_WHEAT	466	6.6e-213	749.6	54.9	A0A1D5ZZN2_WHEAT	Uncharacterized protein	SubName: Full=Uncharacterized protein {ECO:0000313|EnsemblPlants:TRIAE_CS42_5DL_TGACv1_438081_AA1467900.1};
TRINITY_DN13706_c0_g1_i6	tr|A0A1D5ZZN2|A0A1D5ZZN2_WHEAT	415	7.5e-220	772.3	61.6	A0A1D5ZZN2_WHEAT	Uncharacterized protein	SubName: Full=Uncharacterized protein {ECO:0000313|EnsemblPlants:TRIAE_CS42_5DL_TGACv1_438081_AA1467900.1};
TRINITY_DN13706_c0_g1_i4	tr|A0A1D5ZZN2|A0A1D5ZZN2_WHEAT	466	5.7e-213	749.6	64	A0A1D5ZZN2_WHEAT	Uncharacterized protein	SubName: Full=Uncharacterized protein {ECO:0000313|EnsemblPlants:TRIAE_CS42_5DL_TGACv1_438081_AA1467900.1};
TRINITY_DN13706_c0_g2_i1	tr|M7ZSZ6|M7ZSZ6_TRIUA	60	2.2e-21	111.3	29.7	M7ZSZ6_TRIUA	2-hydroxy-6-oxo-6-phenylhexa-2,4-dienoate hydrolase	SubName: Full=2-hydroxy-6-oxo-6-phenylhexa-2,4-dienoate hydrolase {ECO:0000313|EMBL:EMS62751.1, ECO:0000313|EnsemblPlants:TRIUR3_03949-P1};
TRINITY_DN13767_c0_g1_i2	tr|A0A1D5S548|A0A1D5S548_WHEAT	124	9.5e-52	211.5	99.7	A0A1D5S548_WHEAT	Uncharacterized protein	SubName: Full=Uncharacterized protein {ECO:0000313|EnsemblPlants:TRIAE_CS42_1AS_TGACv1_021012_AA0080690.2};
TRINITY_DN13767_c0_g1_i1	tr|A0A1D5SKY2|A0A1D5SKY2_WHEAT	105	8.6e-54	218	100	A0A1D5SKY2_WHEAT	DNA-directed RNA polymerase subunit	RecName: Full=DNA-directed RNA polymerase subunit {ECO:0000256|RuleBase:RU004279}; EC=2.7.7.6 {ECO:0000256|RuleBase:RU004279};
TRINITY_DN13781_c0_g1_i1	tr|W5EML5|W5EML5_WHEAT	338	3.2e-187	663.3	78.5	W5EML5_WHEAT	Uncharacterized protein	SubName: Full=Uncharacterized protein {ECO:0000313|EnsemblPlants:TRIAE_CS42_4DL_TGACv1_345059_AA1151360.3};
TRINITY_DN13781_c0_g1_i5	tr|W5E7U6|W5E7U6_WHEAT	339	1.7e-185	657.5	78.5	W5E7U6_WHEAT	Uncharacterized protein	SubName: Full=Uncharacterized protein {ECO:0000313|EnsemblPlants:TRIAE_CS42_4BL_TGACv1_321190_AA1056990.1};
TRINITY_DN13781_c0_g1_i4	tr|A0A096UQP5|A0A096UQP5_WHEAT	142	1.3e-70	275	61.1	A0A096UQP5_WHEAT	Uncharacterized protein	SubName: Full=Uncharacterized protein {ECO:0000313|EnsemblPlants:TRIAE_CS42_4AS_TGACv1_307339_AA1019660.1};
TRINITY_DN13781_c0_g1_i6	tr|W5EML5|W5EML5_WHEAT	338	3.3e-187	663.3	74.2	W5EML5_WHEAT	Uncharacterized protein	SubName: Full=Uncharacterized protein {ECO:0000313|EnsemblPlants:TRIAE_CS42_4DL_TGACv1_345059_AA1151360.3};
TRINITY_DN13781_c0_g1_i2	tr|W5E7U6|W5E7U6_WHEAT	339	2.3e-187	663.7	81.8	W5E7U6_WHEAT	Uncharacterized protein	SubName: Full=Uncharacterized protein {ECO:0000313|EnsemblPlants:TRIAE_CS42_4BL_TGACv1_321190_AA1056990.1};
TRINITY_DN13781_c0_g1_i3	tr|W5E7U6|W5E7U6_WHEAT	303	2.5e-167	597	76.8	W5E7U6_WHEAT	Uncharacterized protein	SubName: Full=Uncharacterized protein {ECO:0000313|EnsemblPlants:TRIAE_CS42_4BL_TGACv1_321190_AA1056990.1};
TRINITY_DN13761_c2_g1_i4	tr|A0A0N7KIQ5|A0A0N7KIQ5_ORYSJ	109	4e-05	56.6	82.4	A0A0N7KIQ5_ORYSJ	Os04g0252850 protein	SubName: Full=Os04g0252850 protein {ECO:0000313|EMBL:BAS88273.1}; Flags: Fragment;
TRINITY_DN13761_c2_g1_i2	tr|A0A1D5U359|A0A1D5U359_WHEAT	36	1.1e-07	65.1	29.1	A0A1D5U359_WHEAT	Uncharacterized protein	SubName: Full=Uncharacterized protein {ECO:0000313|EnsemblPlants:TRIAE_CS42_2BL_TGACv1_131483_AA0428330.2};
TRINITY_DN13751_c0_g1_i2	tr|M8BVK2|M8BVK2_AEGTA	71	1.1e-32	150.2	13.1	M8BVK2_AEGTA	Uncharacterized protein	SubName: Full=Uncharacterized protein {ECO:0000313|EMBL:EMT25838.1, ECO:0000313|EnsemblPlants:EMT25838};
TRINITY_DN13751_c0_g1_i6	tr|M8BVK2|M8BVK2_AEGTA	71	5.5e-33	150.2	26.7	M8BVK2_AEGTA	Uncharacterized protein	SubName: Full=Uncharacterized protein {ECO:0000313|EMBL:EMT25838.1, ECO:0000313|EnsemblPlants:EMT25838};
TRINITY_DN13751_c0_g1_i1	tr|M8BEF7|M8BEF7_AEGTA	247	1.4e-37	166.4	48.9	M8BEF7_AEGTA	Uncharacterized protein	SubName: Full=Uncharacterized protein {ECO:0000313|EMBL:EMT12085.1, ECO:0000313|EnsemblPlants:EMT12085};
TRINITY_DN13751_c0_g1_i3	tr|M8BEF7|M8BEF7_AEGTA	247	1.4e-37	166.8	38.1	M8BEF7_AEGTA	Uncharacterized protein	SubName: Full=Uncharacterized protein {ECO:0000313|EMBL:EMT12085.1, ECO:0000313|EnsemblPlants:EMT12085};
TRINITY_DN13751_c0_g1_i4	tr|M8BVK2|M8BVK2_AEGTA	71	5.6e-33	150.2	26.4	M8BVK2_AEGTA	Uncharacterized protein	SubName: Full=Uncharacterized protein {ECO:0000313|EMBL:EMT25838.1, ECO:0000313|EnsemblPlants:EMT25838};
TRINITY_DN13751_c0_g1_i5	tr|M8BVK2|M8BVK2_AEGTA	71	7.2e-33	150.2	20.5	M8BVK2_AEGTA	Uncharacterized protein	SubName: Full=Uncharacterized protein {ECO:0000313|EMBL:EMT25838.1, ECO:0000313|EnsemblPlants:EMT25838};
TRINITY_DN13795_c0_g1_i11	tr|A0A1D5SAT4|A0A1D5SAT4_WHEAT	164	1e-51	213	41.1	A0A1D5SAT4_WHEAT	Uncharacterized protein	SubName: Full=Uncharacterized protein {ECO:0000313|EnsemblPlants:TRIAE_CS42_1BL_TGACv1_031230_AA0109990.1};
TRINITY_DN13795_c0_g1_i6	tr|A0A1D5RT11|A0A1D5RT11_WHEAT	163	3.8e-52	214.2	50.8	A0A1D5RT11_WHEAT	Uncharacterized protein	SubName: Full=Uncharacterized protein {ECO:0000313|EnsemblPlants:TRIAE_CS42_1AL_TGACv1_000890_AA0021220.1};
TRINITY_DN13795_c0_g1_i12	tr|A0A1D5SAT4|A0A1D5SAT4_WHEAT	161	4e-50	207.2	57.4	A0A1D5SAT4_WHEAT	Uncharacterized protein	SubName: Full=Uncharacterized protein {ECO:0000313|EnsemblPlants:TRIAE_CS42_1BL_TGACv1_031230_AA0109990.1};
TRINITY_DN13795_c0_g1_i8	tr|A0A1D5RT11|A0A1D5RT11_WHEAT	163	4.5e-52	213.8	56.1	A0A1D5RT11_WHEAT	Uncharacterized protein	SubName: Full=Uncharacterized protein {ECO:0000313|EnsemblPlants:TRIAE_CS42_1AL_TGACv1_000890_AA0021220.1};
TRINITY_DN13795_c0_g1_i2	tr|A0A1D5SAT4|A0A1D5SAT4_WHEAT	164	1.1e-51	212.6	49.3	A0A1D5SAT4_WHEAT	Uncharacterized protein	SubName: Full=Uncharacterized protein {ECO:0000313|EnsemblPlants:TRIAE_CS42_1BL_TGACv1_031230_AA0109990.1};
TRINITY_DN13795_c0_g1_i7	tr|A0A1D5RT11|A0A1D5RT11_WHEAT	163	3.9e-52	214.2	49.6	A0A1D5RT11_WHEAT	Uncharacterized protein	SubName: Full=Uncharacterized protein {ECO:0000313|EnsemblPlants:TRIAE_CS42_1AL_TGACv1_000890_AA0021220.1};
TRINITY_DN13795_c0_g1_i1	tr|A0A1D5SAT4|A0A1D5SAT4_WHEAT	160	1.4e-49	205.3	60.2	A0A1D5SAT4_WHEAT	Uncharacterized protein	SubName: Full=Uncharacterized protein {ECO:0000313|EnsemblPlants:TRIAE_CS42_1BL_TGACv1_031230_AA0109990.1};
TRINITY_DN13795_c0_g1_i9	tr|A0A1D5SAT4|A0A1D5SAT4_WHEAT	161	5e-50	207.2	46.4	A0A1D5SAT4_WHEAT	Uncharacterized protein	SubName: Full=Uncharacterized protein {ECO:0000313|EnsemblPlants:TRIAE_CS42_1BL_TGACv1_031230_AA0109990.1};
TRINITY_DN13795_c0_g1_i10	tr|A0A1D5SAT4|A0A1D5SAT4_WHEAT	161	4.5e-50	207.2	51.8	A0A1D5SAT4_WHEAT	Uncharacterized protein	SubName: Full=Uncharacterized protein {ECO:0000313|EnsemblPlants:TRIAE_CS42_1BL_TGACv1_031230_AA0109990.1};
TRINITY_DN13795_c0_g1_i4	tr|A0A1D5SAT4|A0A1D5SAT4_WHEAT	161	4.6e-50	207.2	50.6	A0A1D5SAT4_WHEAT	Uncharacterized protein	SubName: Full=Uncharacterized protein {ECO:0000313|EnsemblPlants:TRIAE_CS42_1BL_TGACv1_031230_AA0109990.1};
TRINITY_DN13795_c0_g2_i1	tr|A0A1D5VX74|A0A1D5VX74_WHEAT	215	6.3e-107	395.6	97	A0A1D5VX74_WHEAT	Uncharacterized protein	SubName: Full=Uncharacterized protein {ECO:0000313|EnsemblPlants:TRIAE_CS42_3B_TGACv1_222058_AA0756280.1};
TRINITY_DN13795_c0_g2_i2	tr|A0A1D5VX74|A0A1D5VX74_WHEAT	215	9.1e-106	391.7	97	A0A1D5VX74_WHEAT	Uncharacterized protein	SubName: Full=Uncharacterized protein {ECO:0000313|EnsemblPlants:TRIAE_CS42_3B_TGACv1_222058_AA0756280.1};
TRINITY_DN13797_c0_g1_i2	tr|A0A1D5TZH1|A0A1D5TZH1_WHEAT	433	3.9e-218	766.5	67.7	A0A1D5TZH1_WHEAT	Uncharacterized protein	SubName: Full=Uncharacterized protein {ECO:0000313|EnsemblPlants:TRIAE_CS42_2BL_TGACv1_130387_AA0410140.1};
TRINITY_DN13797_c0_g1_i30	tr|M8BHW9|M8BHW9_AEGTA	207	1e-108	403.7	21.1	M8BHW9_AEGTA	Uncharacterized protein	SubName: Full=Uncharacterized protein {ECO:0000313|EMBL:EMT24590.1, ECO:0000313|EnsemblPlants:EMT24590};
TRINITY_DN13797_c0_g1_i8	tr|A0A1D5US63|A0A1D5US63_WHEAT	397	6.6e-221	775.8	61.1	A0A1D5US63_WHEAT	Uncharacterized protein	SubName: Full=Uncharacterized protein {ECO:0000313|EnsemblPlants:TRIAE_CS42_2DL_TGACv1_160742_AA0553690.3};
TRINITY_DN13797_c0_g1_i4	tr|A0A1D5US63|A0A1D5US63_WHEAT	397	1.8e-220	774.2	66	A0A1D5US63_WHEAT	Uncharacterized protein	SubName: Full=Uncharacterized protein {ECO:0000313|EnsemblPlants:TRIAE_CS42_2DL_TGACv1_160742_AA0553690.3};
TRINITY_DN13797_c0_g1_i17	tr|A0A1D5US63|A0A1D5US63_WHEAT	397	7.1e-221	775.4	73.8	A0A1D5US63_WHEAT	Uncharacterized protein	SubName: Full=Uncharacterized protein {ECO:0000313|EnsemblPlants:TRIAE_CS42_2DL_TGACv1_160742_AA0553690.3};
TRINITY_DN13797_c0_g1_i29	tr|A0A1D5US63|A0A1D5US63_WHEAT	328	2.8e-152	548.1	40	A0A1D5US63_WHEAT	Uncharacterized protein	SubName: Full=Uncharacterized protein {ECO:0000313|EnsemblPlants:TRIAE_CS42_2DL_TGACv1_160742_AA0553690.3};
TRINITY_DN13797_c0_g1_i19	tr|A0A1D5US63|A0A1D5US63_WHEAT	275	1.9e-152	548.5	37.4	A0A1D5US63_WHEAT	Uncharacterized protein	SubName: Full=Uncharacterized protein {ECO:0000313|EnsemblPlants:TRIAE_CS42_2DL_TGACv1_160742_AA0553690.3};
TRINITY_DN13797_c0_g1_i21	tr|A0A1D5US63|A0A1D5US63_WHEAT	397	5.6e-221	775.8	72	A0A1D5US63_WHEAT	Uncharacterized protein	SubName: Full=Uncharacterized protein {ECO:0000313|EnsemblPlants:TRIAE_CS42_2DL_TGACv1_160742_AA0553690.3};
TRINITY_DN13797_c0_g1_i28	tr|A0A1D5US61|A0A1D5US61_WHEAT	268	8.3e-122	446	59.3	A0A1D5US61_WHEAT	Uncharacterized protein	SubName: Full=Uncharacterized protein {ECO:0000313|EnsemblPlants:TRIAE_CS42_2DL_TGACv1_160742_AA0553690.1};
TRINITY_DN13797_c0_g1_i26	tr|M8BHW9|M8BHW9_AEGTA	305	8.4e-173	616.3	37.6	M8BHW9_AEGTA	Uncharacterized protein	SubName: Full=Uncharacterized protein {ECO:0000313|EMBL:EMT24590.1, ECO:0000313|EnsemblPlants:EMT24590};
TRINITY_DN13797_c0_g1_i12	tr|A0A1D5US63|A0A1D5US63_WHEAT	299	1.3e-156	562.4	40.3	A0A1D5US63_WHEAT	Uncharacterized protein	SubName: Full=Uncharacterized protein {ECO:0000313|EnsemblPlants:TRIAE_CS42_2DL_TGACv1_160742_AA0553690.3};
TRINITY_DN13797_c0_g1_i15	tr|A0A1D5US63|A0A1D5US63_WHEAT	275	7.1e-153	550.1	35.1	A0A1D5US63_WHEAT	Uncharacterized protein	SubName: Full=Uncharacterized protein {ECO:0000313|EnsemblPlants:TRIAE_CS42_2DL_TGACv1_160742_AA0553690.3};
TRINITY_DN13797_c0_g1_i10	tr|A0A1D5US63|A0A1D5US63_WHEAT	426	3.6e-216	760	67.6	A0A1D5US63_WHEAT	Uncharacterized protein	SubName: Full=Uncharacterized protein {ECO:0000313|EnsemblPlants:TRIAE_CS42_2DL_TGACv1_160742_AA0553690.3};
TRINITY_DN13797_c0_g1_i27	tr|A0A1D5TZH1|A0A1D5TZH1_WHEAT	278	1.4e-149	538.1	68.4	A0A1D5TZH1_WHEAT	Uncharacterized protein	SubName: Full=Uncharacterized protein {ECO:0000313|EnsemblPlants:TRIAE_CS42_2BL_TGACv1_130387_AA0410140.1};
TRINITY_DN13797_c0_g1_i23	tr|A0A1D5US63|A0A1D5US63_WHEAT	328	2.9e-152	548.1	38.7	A0A1D5US63_WHEAT	Uncharacterized protein	SubName: Full=Uncharacterized protein {ECO:0000313|EnsemblPlants:TRIAE_CS42_2DL_TGACv1_160742_AA0553690.3};
TRINITY_DN13797_c0_g1_i16	tr|A0A1D5US63|A0A1D5US63_WHEAT	328	2.7e-152	548.1	42.5	A0A1D5US63_WHEAT	Uncharacterized protein	SubName: Full=Uncharacterized protein {ECO:0000313|EnsemblPlants:TRIAE_CS42_2DL_TGACv1_160742_AA0553690.3};
TRINITY_DN13797_c0_g1_i18	tr|A0A1D5US63|A0A1D5US63_WHEAT	299	1.4e-156	562.4	37.8	A0A1D5US63_WHEAT	Uncharacterized protein	SubName: Full=Uncharacterized protein {ECO:0000313|EnsemblPlants:TRIAE_CS42_2DL_TGACv1_160742_AA0553690.3};
TRINITY_DN13797_c0_g1_i6	tr|A0A1D5US63|A0A1D5US63_WHEAT	397	7.4e-221	775.4	70.8	A0A1D5US63_WHEAT	Uncharacterized protein	SubName: Full=Uncharacterized protein {ECO:0000313|EnsemblPlants:TRIAE_CS42_2DL_TGACv1_160742_AA0553690.3};
TRINITY_DN13797_c0_g1_i13	tr|A0A1D5US63|A0A1D5US63_WHEAT	426	1.3e-216	761.5	62.8	A0A1D5US63_WHEAT	Uncharacterized protein	SubName: Full=Uncharacterized protein {ECO:0000313|EnsemblPlants:TRIAE_CS42_2DL_TGACv1_160742_AA0553690.3};
TRINITY_DN13797_c0_g1_i5	tr|A0A1D5US61|A0A1D5US61_WHEAT	313	1e-147	531.9	76.5	A0A1D5US61_WHEAT	Uncharacterized protein	SubName: Full=Uncharacterized protein {ECO:0000313|EnsemblPlants:TRIAE_CS42_2DL_TGACv1_160742_AA0553690.1};
TRINITY_DN13797_c0_g1_i14	tr|A0A1D5TZH1|A0A1D5TZH1_WHEAT	307	3e-145	523.9	70.5	A0A1D5TZH1_WHEAT	Uncharacterized protein	SubName: Full=Uncharacterized protein {ECO:0000313|EnsemblPlants:TRIAE_CS42_2BL_TGACv1_130387_AA0410140.1};
TRINITY_DN13797_c0_g1_i20	tr|A0A1D5US63|A0A1D5US63_WHEAT	328	2.8e-152	548.1	41	A0A1D5US63_WHEAT	Uncharacterized protein	SubName: Full=Uncharacterized protein {ECO:0000313|EnsemblPlants:TRIAE_CS42_2DL_TGACv1_160742_AA0553690.3};
TRINITY_DN13797_c0_g1_i9	tr|M8BHW9|M8BHW9_AEGTA	73	1.8e-33	151.8	29	M8BHW9_AEGTA	Uncharacterized protein	SubName: Full=Uncharacterized protein {ECO:0000313|EMBL:EMT24590.1, ECO:0000313|EnsemblPlants:EMT24590};
TRINITY_DN13797_c0_g1_i22	tr|M8BHW9|M8BHW9_AEGTA	305	1.7e-172	615.1	39.9	M8BHW9_AEGTA	Uncharacterized protein	SubName: Full=Uncharacterized protein {ECO:0000313|EMBL:EMT24590.1, ECO:0000313|EnsemblPlants:EMT24590};
TRINITY_DN13797_c0_g1_i25	tr|A0A1D5TZH1|A0A1D5TZH1_WHEAT	433	4.2e-218	766.5	63	A0A1D5TZH1_WHEAT	Uncharacterized protein	SubName: Full=Uncharacterized protein {ECO:0000313|EnsemblPlants:TRIAE_CS42_2BL_TGACv1_130387_AA0410140.1};
TRINITY_DN13797_c0_g1_i1	tr|A0A1D5US61|A0A1D5US61_WHEAT	342	2.1e-143	517.7	78.1	A0A1D5US61_WHEAT	Uncharacterized protein	SubName: Full=Uncharacterized protein {ECO:0000313|EnsemblPlants:TRIAE_CS42_2DL_TGACv1_160742_AA0553690.1};
TRINITY_DN13711_c0_g1_i4	tr|A0A1D5ZUM0|A0A1D5ZUM0_WHEAT	467	1.4e-216	761.1	83.9	A0A1D5ZUM0_WHEAT	Uncharacterized protein	SubName: Full=Uncharacterized protein {ECO:0000313|EnsemblPlants:TRIAE_CS42_5DL_TGACv1_435093_AA1445920.1};
TRINITY_DN13711_c0_g1_i1	tr|A0A1D5ZUM0|A0A1D5ZUM0_WHEAT	467	1.8e-216	761.1	68.4	A0A1D5ZUM0_WHEAT	Uncharacterized protein	SubName: Full=Uncharacterized protein {ECO:0000313|EnsemblPlants:TRIAE_CS42_5DL_TGACv1_435093_AA1445920.1};
TRINITY_DN13711_c0_g1_i3	tr|A0A287R8S1|A0A287R8S1_HORVV	447	2.1e-183	651	79.2	A0A287R8S1_HORVV	Uncharacterized protein	SubName: Full=Uncharacterized protein {ECO:0000313|EnsemblPlants:HORVU5Hr1G053330.6};
TRINITY_DN13711_c0_g1_i5	tr|A0A287R8S1|A0A287R8S1_HORVV	40	0.00044	52.8	35.1	A0A287R8S1_HORVV	Uncharacterized protein	SubName: Full=Uncharacterized protein {ECO:0000313|EnsemblPlants:HORVU5Hr1G053330.6};
TRINITY_DN13711_c0_g1_i2	tr|A0A1D5ZUM0|A0A1D5ZUM0_WHEAT	467	2.6e-220	773.9	68.4	A0A1D5ZUM0_WHEAT	Uncharacterized protein	SubName: Full=Uncharacterized protein {ECO:0000313|EnsemblPlants:TRIAE_CS42_5DL_TGACv1_435093_AA1445920.1};
TRINITY_DN13720_c0_g1_i7	tr|M7YRY4|M7YRY4_TRIUA	53	4.9e-14	87.8	13.8	M7YRY4_TRIUA	Uncharacterized protein	SubName: Full=Uncharacterized protein {ECO:0000313|EMBL:EMS53418.1, ECO:0000313|EnsemblPlants:TRIUR3_10557-P1};
TRINITY_DN13720_c0_g1_i6	tr|M7YRY4|M7YRY4_TRIUA	53	7.8e-14	87	14.7	M7YRY4_TRIUA	Uncharacterized protein	SubName: Full=Uncharacterized protein {ECO:0000313|EMBL:EMS53418.1, ECO:0000313|EnsemblPlants:TRIUR3_10557-P1};
TRINITY_DN13720_c0_g1_i14	tr|A0A0V0YTN2|A0A0V0YTN2_9BILA	43	2.8e-14	86.3	57.3	A0A0V0YTN2_9BILA	Uncharacterized protein	SubName: Full=Uncharacterized protein {ECO:0000313|EMBL:KRY03684.1};
TRINITY_DN13720_c0_g1_i2	tr|M7YRY4|M7YRY4_TRIUA	53	4.9e-14	87	23.3	M7YRY4_TRIUA	Uncharacterized protein	SubName: Full=Uncharacterized protein {ECO:0000313|EMBL:EMS53418.1, ECO:0000313|EnsemblPlants:TRIUR3_10557-P1};
TRINITY_DN13785_c0_g1_i2	tr|W5DPP5|W5DPP5_WHEAT	172	9.9e-94	351.7	82.2	W5DPP5_WHEAT	Uncharacterized protein	SubName: Full=Uncharacterized protein {ECO:0000313|EnsemblPlants:TRIAE_CS42_4AL_TGACv1_289503_AA0972090.1};
TRINITY_DN13785_c0_g1_i3	tr|A0A1D6RZS9|A0A1D6RZS9_WHEAT	519	4.3e-273	949.1	80.3	A0A1D6RZS9_WHEAT	Uncharacterized protein	SubName: Full=Uncharacterized protein {ECO:0000313|EnsemblPlants:TRIAE_CS42_4DS_TGACv1_361038_AA1159400.1};
TRINITY_DN13785_c0_g1_i1	tr|A0A1D6RZS9|A0A1D6RZS9_WHEAT	493	1.1e-278	967.6	79.4	A0A1D6RZS9_WHEAT	Uncharacterized protein	SubName: Full=Uncharacterized protein {ECO:0000313|EnsemblPlants:TRIAE_CS42_4DS_TGACv1_361038_AA1159400.1};
TRINITY_DN13785_c0_g1_i4	tr|A0A1D5X3S2|A0A1D5X3S2_WHEAT	290	2.7e-163	584.3	47.3	A0A1D5X3S2_WHEAT	Uncharacterized protein	SubName: Full=Uncharacterized protein {ECO:0000313|EnsemblPlants:TRIAE_CS42_4AL_TGACv1_289503_AA0972090.4};
TRINITY_DN13785_c0_g3_i1	tr|W5DPP5|W5DPP5_WHEAT	95	2.8e-11	79.3	14.1	W5DPP5_WHEAT	Uncharacterized protein	SubName: Full=Uncharacterized protein {ECO:0000313|EnsemblPlants:TRIAE_CS42_4AL_TGACv1_289503_AA0972090.1};
TRINITY_DN13785_c0_g3_i3	tr|W5ETK6|W5ETK6_WHEAT	191	1.2e-20	110.5	26.3	W5ETK6_WHEAT	Uncharacterized protein	SubName: Full=Uncharacterized protein {ECO:0000313|EnsemblPlants:TRIAE_CS42_4DS_TGACv1_361038_AA1159400.2};
TRINITY_DN13785_c0_g3_i6	tr|W5DPP5|W5DPP5_WHEAT	95	2.5e-11	79.3	15.5	W5DPP5_WHEAT	Uncharacterized protein	SubName: Full=Uncharacterized protein {ECO:0000313|EnsemblPlants:TRIAE_CS42_4AL_TGACv1_289503_AA0972090.1};
TRINITY_DN13785_c0_g3_i2	tr|M8C2R2|M8C2R2_AEGTA	170	6.4e-18	101.3	24.5	M8C2R2_AEGTA	Ribonucleases P/MRP protein subunit POP1	SubName: Full=Ribonucleases P/MRP protein subunit POP1 {ECO:0000313|EMBL:EMT31565.1, ECO:0000313|EnsemblPlants:EMT31565};
TRINITY_DN13785_c0_g3_i4	tr|W5DPP5|W5DPP5_WHEAT	95	6.4e-11	78.6	10.5	W5DPP5_WHEAT	Uncharacterized protein	SubName: Full=Uncharacterized protein {ECO:0000313|EnsemblPlants:TRIAE_CS42_4AL_TGACv1_289503_AA0972090.1};
TRINITY_DN13785_c0_g3_i5	tr|W5DPP5|W5DPP5_WHEAT	95	6e-11	78.6	11.2	W5DPP5_WHEAT	Uncharacterized protein	SubName: Full=Uncharacterized protein {ECO:0000313|EnsemblPlants:TRIAE_CS42_4AL_TGACv1_289503_AA0972090.1};
TRINITY_DN13742_c0_g1_i4	tr|M8A0F5|M8A0F5_TRIUA	240	2.6e-42	181.8	60.2	M8A0F5_TRIUA	Chaperone protein DnaJ	SubName: Full=Chaperone protein DnaJ {ECO:0000313|EMBL:EMS65772.1, ECO:0000313|EnsemblPlants:TRIUR3_33404-P1};
TRINITY_DN13742_c0_g1_i7	tr|M8A0F5|M8A0F5_TRIUA	258	1.3e-52	216.1	61.2	M8A0F5_TRIUA	Chaperone protein DnaJ	SubName: Full=Chaperone protein DnaJ {ECO:0000313|EMBL:EMS65772.1, ECO:0000313|EnsemblPlants:TRIUR3_33404-P1};
TRINITY_DN13742_c0_g1_i3	tr|M8A0F5|M8A0F5_TRIUA	264	4.3e-56	228.4	37.1	M8A0F5_TRIUA	Chaperone protein DnaJ	SubName: Full=Chaperone protein DnaJ {ECO:0000313|EMBL:EMS65772.1, ECO:0000313|EnsemblPlants:TRIUR3_33404-P1};
TRINITY_DN13742_c0_g1_i1	tr|M8A0F5|M8A0F5_TRIUA	264	4.3e-56	228.4	37.2	M8A0F5_TRIUA	Chaperone protein DnaJ	SubName: Full=Chaperone protein DnaJ {ECO:0000313|EMBL:EMS65772.1, ECO:0000313|EnsemblPlants:TRIUR3_33404-P1};
TRINITY_DN13742_c0_g1_i5	tr|M8CEV1|M8CEV1_AEGTA	66	3.8e-27	131	22.6	M8CEV1_AEGTA	Chaperone protein dnaJ	SubName: Full=Chaperone protein dnaJ {ECO:0000313|EMBL:EMT32728.1, ECO:0000313|EnsemblPlants:EMT32728};
TRINITY_DN13742_c0_g1_i10	tr|M8A0F5|M8A0F5_TRIUA	264	5.7e-56	228.4	28.2	M8A0F5_TRIUA	Chaperone protein DnaJ	SubName: Full=Chaperone protein DnaJ {ECO:0000313|EMBL:EMS65772.1, ECO:0000313|EnsemblPlants:TRIUR3_33404-P1};
TRINITY_DN13742_c0_g1_i11	tr|M8A0F5|M8A0F5_TRIUA	264	5.6e-56	228.4	28.3	M8A0F5_TRIUA	Chaperone protein DnaJ	SubName: Full=Chaperone protein DnaJ {ECO:0000313|EMBL:EMS65772.1, ECO:0000313|EnsemblPlants:TRIUR3_33404-P1};
TRINITY_DN13742_c0_g1_i6	tr|M8A0F5|M8A0F5_TRIUA	264	5.7e-56	228.4	28.1	M8A0F5_TRIUA	Chaperone protein DnaJ	SubName: Full=Chaperone protein DnaJ {ECO:0000313|EMBL:EMS65772.1, ECO:0000313|EnsemblPlants:TRIUR3_33404-P1};
TRINITY_DN13742_c0_g1_i8	tr|M8A0F5|M8A0F5_TRIUA	264	4.3e-56	228.4	37.4	M8A0F5_TRIUA	Chaperone protein DnaJ	SubName: Full=Chaperone protein DnaJ {ECO:0000313|EMBL:EMS65772.1, ECO:0000313|EnsemblPlants:TRIUR3_33404-P1};
TRINITY_DN13791_c0_g1_i1	tr|A0A1D5S9X6|A0A1D5S9X6_WHEAT	37	8.8e-11	75.5	27.5	A0A1D5S9X6_WHEAT	Uncharacterized protein	SubName: Full=Uncharacterized protein {ECO:0000313|EnsemblPlants:TRIAE_CS42_1BL_TGACv1_031006_AA0105600.1};
TRINITY_DN13791_c0_g2_i1	tr|A0A1D5SR77|A0A1D5SR77_WHEAT	460	2e-204	721.1	68.5	A0A1D5SR77_WHEAT	Uncharacterized protein	SubName: Full=Uncharacterized protein {ECO:0000313|EnsemblPlants:TRIAE_CS42_1DL_TGACv1_061281_AA0191130.1};
TRINITY_DN13791_c0_g2_i5	tr|A0A1D5SR77|A0A1D5SR77_WHEAT	460	3.4e-204	720.3	68.5	A0A1D5SR77_WHEAT	Uncharacterized protein	SubName: Full=Uncharacterized protein {ECO:0000313|EnsemblPlants:TRIAE_CS42_1DL_TGACv1_061281_AA0191130.1};
TRINITY_DN13791_c0_g2_i6	tr|A0A1D5SR77|A0A1D5SR77_WHEAT	460	4e-205	723.4	68.4	A0A1D5SR77_WHEAT	Uncharacterized protein	SubName: Full=Uncharacterized protein {ECO:0000313|EnsemblPlants:TRIAE_CS42_1DL_TGACv1_061281_AA0191130.1};
TRINITY_DN13791_c0_g2_i3	tr|A0A1D5SR77|A0A1D5SR77_WHEAT	459	3.3e-207	730.3	68.4	A0A1D5SR77_WHEAT	Uncharacterized protein	SubName: Full=Uncharacterized protein {ECO:0000313|EnsemblPlants:TRIAE_CS42_1DL_TGACv1_061281_AA0191130.1};
TRINITY_DN13791_c0_g2_i2	tr|A0A1D5SR77|A0A1D5SR77_WHEAT	459	4.3e-207	729.9	68.4	A0A1D5SR77_WHEAT	Uncharacterized protein	SubName: Full=Uncharacterized protein {ECO:0000313|EnsemblPlants:TRIAE_CS42_1DL_TGACv1_061281_AA0191130.1};
TRINITY_DN13768_c0_g1_i3	tr|M7ZBH7|M7ZBH7_TRIUA	369	1.5e-203	717.6	83	M7ZBH7_TRIUA	Glyceraldehyde-3-phosphate dehydrogenase	RecName: Full=Glyceraldehyde-3-phosphate dehydrogenase {ECO:0000256|RuleBase:RU361160}; EC=1.2.1.- {ECO:0000256|RuleBase:RU361160};
TRINITY_DN13768_c0_g1_i2	tr|M7ZBH7|M7ZBH7_TRIUA	366	6.6e-202	711.8	99.8	M7ZBH7_TRIUA	Glyceraldehyde-3-phosphate dehydrogenase	RecName: Full=Glyceraldehyde-3-phosphate dehydrogenase {ECO:0000256|RuleBase:RU361160}; EC=1.2.1.- {ECO:0000256|RuleBase:RU361160};
TRINITY_DN13768_c0_g1_i4	tr|M7ZBH7|M7ZBH7_TRIUA	78	3e-35	156	99.6	M7ZBH7_TRIUA	Glyceraldehyde-3-phosphate dehydrogenase	RecName: Full=Glyceraldehyde-3-phosphate dehydrogenase {ECO:0000256|RuleBase:RU361160}; EC=1.2.1.- {ECO:0000256|RuleBase:RU361160};
TRINITY_DN13768_c0_g1_i1	tr|W5H6Q5|W5H6Q5_WHEAT	366	2.3e-201	710.3	83.1	W5H6Q5_WHEAT	Glyceraldehyde-3-phosphate dehydrogenase	RecName: Full=Glyceraldehyde-3-phosphate dehydrogenase {ECO:0000256|RuleBase:RU361160}; EC=1.2.1.- {ECO:0000256|RuleBase:RU361160};
TRINITY_DN13768_c0_g2_i1	tr|A3QQP6|A3QQP6_MESVI	39	4.2e-11	77	21	A3QQP6_MESVI	Glyceraldehyde-3-phosphate dehydrogenase	SubName: Full=Glyceraldehyde-3-phosphate dehydrogenase {ECO:0000313|EMBL:ABD58899.1}; Flags: Fragment;
TRINITY_DN13768_c0_g2_i2	tr|Q655W2|Q655W2_ORYSJ	41	2.9e-12	80.9	22	Q655W2_ORYSJ	Glyceraldehyde-3-phosphate dehydrogenase	RecName: Full=Glyceraldehyde-3-phosphate dehydrogenase {ECO:0000256|RuleBase:RU361160}; EC=1.2.1.- {ECO:0000256|RuleBase:RU361160};
TRINITY_DN13768_c1_g1_i6	tr|M8A8M0|M8A8M0_TRIUA	215	3.3e-47	198	55	M8A8M0_TRIUA	Glyceraldehyde-3-phosphate dehydrogenase	RecName: Full=Glyceraldehyde-3-phosphate dehydrogenase {ECO:0000256|RuleBase:RU361160}; EC=1.2.1.- {ECO:0000256|RuleBase:RU361160};
TRINITY_DN13768_c1_g1_i7	tr|W5GYX5|W5GYX5_WHEAT	148	3e-77	297.4	51.4	W5GYX5_WHEAT	Glyceraldehyde-3-phosphate dehydrogenase	RecName: Full=Glyceraldehyde-3-phosphate dehydrogenase {ECO:0000256|RuleBase:RU361160}; EC=1.2.1.- {ECO:0000256|RuleBase:RU361160};
TRINITY_DN13768_c1_g1_i8	tr|M8A8M0|M8A8M0_TRIUA	217	2.7e-45	191.4	63.2	M8A8M0_TRIUA	Glyceraldehyde-3-phosphate dehydrogenase	RecName: Full=Glyceraldehyde-3-phosphate dehydrogenase {ECO:0000256|RuleBase:RU361160}; EC=1.2.1.- {ECO:0000256|RuleBase:RU361160};
TRINITY_DN13768_c1_g1_i2	tr|M8A8M0|M8A8M0_TRIUA	217	4.9e-47	197.2	64.4	M8A8M0_TRIUA	Glyceraldehyde-3-phosphate dehydrogenase	RecName: Full=Glyceraldehyde-3-phosphate dehydrogenase {ECO:0000256|RuleBase:RU361160}; EC=1.2.1.- {ECO:0000256|RuleBase:RU361160};
TRINITY_DN13768_c1_g1_i5	tr|W5GYX5|W5GYX5_WHEAT	148	3.1e-77	297.4	50.9	W5GYX5_WHEAT	Glyceraldehyde-3-phosphate dehydrogenase	RecName: Full=Glyceraldehyde-3-phosphate dehydrogenase {ECO:0000256|RuleBase:RU361160}; EC=1.2.1.- {ECO:0000256|RuleBase:RU361160};
TRINITY_DN13768_c1_g1_i3	tr|W5GYX5|W5GYX5_WHEAT	63	1.6e-26	127.5	57.8	W5GYX5_WHEAT	Glyceraldehyde-3-phosphate dehydrogenase	RecName: Full=Glyceraldehyde-3-phosphate dehydrogenase {ECO:0000256|RuleBase:RU361160}; EC=1.2.1.- {ECO:0000256|RuleBase:RU361160};
TRINITY_DN13768_c1_g1_i4	tr|W5G5H3|W5G5H3_WHEAT	148	4.7e-77	297	43.5	W5G5H3_WHEAT	Glyceraldehyde-3-phosphate dehydrogenase	RecName: Full=Glyceraldehyde-3-phosphate dehydrogenase {ECO:0000256|RuleBase:RU361160}; EC=1.2.1.- {ECO:0000256|RuleBase:RU361160};
TRINITY_DN13738_c0_g1_i1	tr|D9IXC7|D9IXC7_HORVV	159	1.9e-81	310.5	99.8	D9IXC7_HORVV	Cellulose synthase	RecName: Full=Cellulose synthase {ECO:0000256|RuleBase:RU361116}; EC=2.4.1.12 {ECO:0000256|RuleBase:RU361116};
TRINITY_DN13728_c0_g1_i5	tr|A0A1D5VEQ4|A0A1D5VEQ4_WHEAT	120	1.6e-62	249.2	25.1	A0A1D5VEQ4_WHEAT	Uncharacterized protein	SubName: Full=Uncharacterized protein {ECO:0000313|EnsemblPlants:TRIAE_CS42_3AL_TGACv1_196775_AA0662850.2};
TRINITY_DN13728_c0_g1_i15	tr|A0A1D5U417|A0A1D5U417_WHEAT	122	8.8e-63	250	26.8	A0A1D5U417_WHEAT	Uncharacterized protein	SubName: Full=Uncharacterized protein {ECO:0000313|EnsemblPlants:TRIAE_CS42_2BL_TGACv1_131822_AA0432580.1};
TRINITY_DN13728_c0_g1_i10	tr|M8B2Y4|M8B2Y4_AEGTA	109	3.8e-57	229.9	58.7	M8B2Y4_AEGTA	Uncharacterized protein	SubName: Full=Uncharacterized protein {ECO:0000313|EMBL:EMT11107.1, ECO:0000313|EnsemblPlants:EMT11107};
TRINITY_DN13728_c0_g1_i4	tr|A0A1D5U417|A0A1D5U417_WHEAT	122	8.6e-63	250	27.3	A0A1D5U417_WHEAT	Uncharacterized protein	SubName: Full=Uncharacterized protein {ECO:0000313|EnsemblPlants:TRIAE_CS42_2BL_TGACv1_131822_AA0432580.1};
TRINITY_DN13728_c0_g1_i8	tr|A0A1D5UHZ0|A0A1D5UHZ0_WHEAT	122	1.8e-64	255.8	24	A0A1D5UHZ0_WHEAT	Uncharacterized protein	SubName: Full=Uncharacterized protein {ECO:0000313|EnsemblPlants:TRIAE_CS42_2DL_TGACv1_158218_AA0512820.1};
TRINITY_DN13728_c0_g1_i16	tr|A0A1D5UHZ0|A0A1D5UHZ0_WHEAT	122	4.6e-63	251.1	22.8	A0A1D5UHZ0_WHEAT	Uncharacterized protein	SubName: Full=Uncharacterized protein {ECO:0000313|EnsemblPlants:TRIAE_CS42_2DL_TGACv1_158218_AA0512820.1};
TRINITY_DN13728_c0_g1_i13	tr|A0A1D5UHZ0|A0A1D5UHZ0_WHEAT	122	2.5e-63	251.1	42	A0A1D5UHZ0_WHEAT	Uncharacterized protein	SubName: Full=Uncharacterized protein {ECO:0000313|EnsemblPlants:TRIAE_CS42_2DL_TGACv1_158218_AA0512820.1};
TRINITY_DN13728_c0_g1_i12	tr|A0A1D5VEQ4|A0A1D5VEQ4_WHEAT	120	1.5e-62	249.2	26.4	A0A1D5VEQ4_WHEAT	Uncharacterized protein	SubName: Full=Uncharacterized protein {ECO:0000313|EnsemblPlants:TRIAE_CS42_3AL_TGACv1_196775_AA0662850.2};
TRINITY_DN13728_c0_g1_i7	tr|A0A1D5UHZ0|A0A1D5UHZ0_WHEAT	122	1.8e-64	255.8	23.9	A0A1D5UHZ0_WHEAT	Uncharacterized protein	SubName: Full=Uncharacterized protein {ECO:0000313|EnsemblPlants:TRIAE_CS42_2DL_TGACv1_158218_AA0512820.1};
TRINITY_DN13728_c0_g1_i14	tr|A0A1D5VEQ4|A0A1D5VEQ4_WHEAT	120	1.6e-62	249.2	24.6	A0A1D5VEQ4_WHEAT	Uncharacterized protein	SubName: Full=Uncharacterized protein {ECO:0000313|EnsemblPlants:TRIAE_CS42_3AL_TGACv1_196775_AA0662850.2};
TRINITY_DN13728_c0_g1_i1	tr|A0A1D5UHZ0|A0A1D5UHZ0_WHEAT	122	1.5e-64	255.8	28.9	A0A1D5UHZ0_WHEAT	Uncharacterized protein	SubName: Full=Uncharacterized protein {ECO:0000313|EnsemblPlants:TRIAE_CS42_2DL_TGACv1_158218_AA0512820.1};
TRINITY_DN13728_c0_g1_i6	tr|A0A1D5U417|A0A1D5U417_WHEAT	122	1.7e-62	249.6	17.7	A0A1D5U417_WHEAT	Uncharacterized protein	SubName: Full=Uncharacterized protein {ECO:0000313|EnsemblPlants:TRIAE_CS42_2BL_TGACv1_131822_AA0432580.1};
TRINITY_DN13728_c0_g1_i9	tr|A0A1D5VEQ4|A0A1D5VEQ4_WHEAT	120	1.5e-62	249.2	26	A0A1D5VEQ4_WHEAT	Uncharacterized protein	SubName: Full=Uncharacterized protein {ECO:0000313|EnsemblPlants:TRIAE_CS42_3AL_TGACv1_196775_AA0662850.2};
TRINITY_DN13728_c0_g1_i3	tr|A0A1D5VEQ4|A0A1D5VEQ4_WHEAT	120	3e-62	248.8	17.2	A0A1D5VEQ4_WHEAT	Uncharacterized protein	SubName: Full=Uncharacterized protein {ECO:0000313|EnsemblPlants:TRIAE_CS42_3AL_TGACv1_196775_AA0662850.2};
TRINITY_DN13728_c0_g1_i2	tr|A0A1D5UHZ0|A0A1D5UHZ0_WHEAT	122	1.9e-64	255.8	23.1	A0A1D5UHZ0_WHEAT	Uncharacterized protein	SubName: Full=Uncharacterized protein {ECO:0000313|EnsemblPlants:TRIAE_CS42_2DL_TGACv1_158218_AA0512820.1};
TRINITY_DN13728_c0_g1_i11	tr|A0A1D5UHZ0|A0A1D5UHZ0_WHEAT	122	1.9e-64	255.8	23	A0A1D5UHZ0_WHEAT	Uncharacterized protein	SubName: Full=Uncharacterized protein {ECO:0000313|EnsemblPlants:TRIAE_CS42_2DL_TGACv1_158218_AA0512820.1};
TRINITY_DN13727_c0_g1_i7	tr|A0A287Y043|A0A287Y043_HORVV	894	0	1250	90.9	A0A287Y043_HORVV	Uncharacterized protein	SubName: Full=Uncharacterized protein {ECO:0000313|EnsemblPlants:HORVU7Hr1G120020.3};
TRINITY_DN13727_c0_g1_i2	tr|M8BKS1|M8BKS1_AEGTA	670	0	1261.9	98.9	M8BKS1_AEGTA	Disease resistance protein RPM1	SubName: Full=Disease resistance protein RPM1 {ECO:0000313|EMBL:EMT25585.1, ECO:0000313|EnsemblPlants:EMT25585};
TRINITY_DN13727_c0_g1_i3	tr|A0A1D5VGI6|A0A1D5VGI6_WHEAT	417	2.1e-204	720.3	98	A0A1D5VGI6_WHEAT	Uncharacterized protein	SubName: Full=Uncharacterized protein {ECO:0000313|EnsemblPlants:TRIAE_CS42_3AS_TGACv1_210534_AA0674880.1};
TRINITY_DN13727_c0_g1_i6	tr|A0A1D5VGI8|A0A1D5VGI8_WHEAT	325	9.2e-165	589	62.1	A0A1D5VGI8_WHEAT	Uncharacterized protein	SubName: Full=Uncharacterized protein {ECO:0000313|EnsemblPlants:TRIAE_CS42_3AS_TGACv1_210534_AA0674890.1};
TRINITY_DN13727_c0_g1_i1	tr|M8BKS1|M8BKS1_AEGTA	890	0	1287.7	90.1	M8BKS1_AEGTA	Disease resistance protein RPM1	SubName: Full=Disease resistance protein RPM1 {ECO:0000313|EMBL:EMT25585.1, ECO:0000313|EnsemblPlants:EMT25585};
TRINITY_DN13727_c0_g1_i4	tr|M8BKS1|M8BKS1_AEGTA	666	0	1351.3	98.9	M8BKS1_AEGTA	Disease resistance protein RPM1	SubName: Full=Disease resistance protein RPM1 {ECO:0000313|EMBL:EMT25585.1, ECO:0000313|EnsemblPlants:EMT25585};
TRINITY_DN13727_c0_g1_i5	tr|A0A1D5VGI8|A0A1D5VGI8_WHEAT	324	3.7e-164	587	58.8	A0A1D5VGI8_WHEAT	Uncharacterized protein	SubName: Full=Uncharacterized protein {ECO:0000313|EnsemblPlants:TRIAE_CS42_3AS_TGACv1_210534_AA0674890.1};
TRINITY_DN13722_c0_g1_i2	tr|A0A1D6RJ92|A0A1D6RJ92_WHEAT	441	4.8e-214	753.4	49.7	A0A1D6RJ92_WHEAT	Uncharacterized protein	SubName: Full=Uncharacterized protein {ECO:0000313|EnsemblPlants:TRIAE_CS42_2AL_TGACv1_094475_AA0298430.2};
TRINITY_DN13722_c0_g1_i3	tr|A0A1D6RJ92|A0A1D6RJ92_WHEAT	424	6.4e-211	742.3	82.3	A0A1D6RJ92_WHEAT	Uncharacterized protein	SubName: Full=Uncharacterized protein {ECO:0000313|EnsemblPlants:TRIAE_CS42_2AL_TGACv1_094475_AA0298430.2};
TRINITY_DN13722_c0_g1_i1	tr|A0A1D6RJ92|A0A1D6RJ92_WHEAT	441	2e-212	748	49.7	A0A1D6RJ92_WHEAT	Uncharacterized protein	SubName: Full=Uncharacterized protein {ECO:0000313|EnsemblPlants:TRIAE_CS42_2AL_TGACv1_094475_AA0298430.2};
TRINITY_DN13722_c0_g1_i5	tr|A0A1D6RJ92|A0A1D6RJ92_WHEAT	424	2.4e-210	740.3	82.3	A0A1D6RJ92_WHEAT	Uncharacterized protein	SubName: Full=Uncharacterized protein {ECO:0000313|EnsemblPlants:TRIAE_CS42_2AL_TGACv1_094475_AA0298430.2};
TRINITY_DN13722_c0_g1_i4	tr|A0A1D6RJ92|A0A1D6RJ92_WHEAT	441	4.8e-214	753.4	49.7	A0A1D6RJ92_WHEAT	Uncharacterized protein	SubName: Full=Uncharacterized protein {ECO:0000313|EnsemblPlants:TRIAE_CS42_2AL_TGACv1_094475_AA0298430.2};
TRINITY_DN13793_c0_g1_i6	tr|A0A1D5UMM9|A0A1D5UMM9_WHEAT	499	4.3e-279	968.8	94.2	A0A1D5UMM9_WHEAT	Mannosyltransferase	RecName: Full=Mannosyltransferase {ECO:0000256|RuleBase:RU363075}; EC=2.4.1.- {ECO:0000256|RuleBase:RU363075};
TRINITY_DN13793_c0_g1_i7	tr|A0A1D5UMM9|A0A1D5UMM9_WHEAT	499	1.8e-280	973.4	94.2	A0A1D5UMM9_WHEAT	Mannosyltransferase	RecName: Full=Mannosyltransferase {ECO:0000256|RuleBase:RU363075}; EC=2.4.1.- {ECO:0000256|RuleBase:RU363075};
TRINITY_DN13793_c0_g1_i4	tr|A0A1D5UMM9|A0A1D5UMM9_WHEAT	499	3.3e-280	972.6	84.2	A0A1D5UMM9_WHEAT	Mannosyltransferase	RecName: Full=Mannosyltransferase {ECO:0000256|RuleBase:RU363075}; EC=2.4.1.- {ECO:0000256|RuleBase:RU363075};
TRINITY_DN13793_c0_g1_i1	tr|A0A1D5UMM9|A0A1D5UMM9_WHEAT	499	3.7e-280	972.6	76.8	A0A1D5UMM9_WHEAT	Mannosyltransferase	RecName: Full=Mannosyltransferase {ECO:0000256|RuleBase:RU363075}; EC=2.4.1.- {ECO:0000256|RuleBase:RU363075};
TRINITY_DN13793_c0_g1_i2	tr|A0A1D5UMM9|A0A1D5UMM9_WHEAT	499	2.3e-280	973	92.6	A0A1D5UMM9_WHEAT	Mannosyltransferase	RecName: Full=Mannosyltransferase {ECO:0000256|RuleBase:RU363075}; EC=2.4.1.- {ECO:0000256|RuleBase:RU363075};
TRINITY_DN13793_c0_g1_i3	tr|A0A1D5UMM9|A0A1D5UMM9_WHEAT	499	2.6e-280	973	84.6	A0A1D5UMM9_WHEAT	Mannosyltransferase	RecName: Full=Mannosyltransferase {ECO:0000256|RuleBase:RU363075}; EC=2.4.1.- {ECO:0000256|RuleBase:RU363075};
TRINITY_DN13734_c0_g1_i1	tr|A0A1D5WRR3|A0A1D5WRR3_WHEAT	117	8.3e-53	215.3	74.5	A0A1D5WRR3_WHEAT	Auxin-responsive protein	RecName: Full=Auxin-responsive protein {ECO:0000256|RuleBase:RU004549};
TRINITY_DN13734_c0_g2_i2	tr|A0A1D5T629|A0A1D5T629_WHEAT	448	3e-212	747.3	56.9	A0A1D5T629_WHEAT	Uncharacterized protein	SubName: Full=Uncharacterized protein {ECO:0000313|EnsemblPlants:TRIAE_CS42_2AL_TGACv1_093048_AA0270390.1};
TRINITY_DN13734_c0_g2_i5	tr|A0A1D5T629|A0A1D5T629_WHEAT	407	9.6e-190	672.2	65.9	A0A1D5T629_WHEAT	Uncharacterized protein	SubName: Full=Uncharacterized protein {ECO:0000313|EnsemblPlants:TRIAE_CS42_2AL_TGACv1_093048_AA0270390.1};
TRINITY_DN13734_c0_g2_i4	tr|A0A1D5T629|A0A1D5T629_WHEAT	434	2.6e-221	777.3	58.5	A0A1D5T629_WHEAT	Uncharacterized protein	SubName: Full=Uncharacterized protein {ECO:0000313|EnsemblPlants:TRIAE_CS42_2AL_TGACv1_093048_AA0270390.1};
TRINITY_DN13734_c0_g2_i1	tr|A0A1D5T629|A0A1D5T629_WHEAT	390	6.4e-104	387.1	37.5	A0A1D5T629_WHEAT	Uncharacterized protein	SubName: Full=Uncharacterized protein {ECO:0000313|EnsemblPlants:TRIAE_CS42_2AL_TGACv1_093048_AA0270390.1};
TRINITY_DN13734_c0_g3_i1	tr|M8D162|M8D162_AEGTA	116	1.3e-58	235.3	43.6	M8D162_AEGTA	Auxin-responsive protein	RecName: Full=Auxin-responsive protein {ECO:0000256|RuleBase:RU004549};
TRINITY_DN13734_c0_g3_i2	tr|M8D162|M8D162_AEGTA	116	1.3e-58	235.3	44.7	M8D162_AEGTA	Auxin-responsive protein	RecName: Full=Auxin-responsive protein {ECO:0000256|RuleBase:RU004549};
TRINITY_DN13734_c1_g1_i4	tr|A0A1D5WGU0|A0A1D5WGU0_WHEAT	648	0	1290	82.1	A0A1D5WGU0_WHEAT	Uncharacterized protein	SubName: Full=Uncharacterized protein {ECO:0000313|EnsemblPlants:TRIAE_CS42_3DL_TGACv1_249884_AA0858100.1};
TRINITY_DN13734_c1_g1_i2	tr|A0A1D5WGU0|A0A1D5WGU0_WHEAT	389	3.5e-218	766.9	53	A0A1D5WGU0_WHEAT	Uncharacterized protein	SubName: Full=Uncharacterized protein {ECO:0000313|EnsemblPlants:TRIAE_CS42_3DL_TGACv1_249884_AA0858100.1};
TRINITY_DN13734_c1_g1_i3	tr|A0A1D5WGU0|A0A1D5WGU0_WHEAT	197	2.6e-103	383.6	85.2	A0A1D5WGU0_WHEAT	Uncharacterized protein	SubName: Full=Uncharacterized protein {ECO:0000313|EnsemblPlants:TRIAE_CS42_3DL_TGACv1_249884_AA0858100.1};
TRINITY_DN13709_c0_g1_i1	tr|A0A096UT55|A0A096UT55_WHEAT	68	4.6e-32	145.2	98.1	A0A096UT55_WHEAT	Uncharacterized protein	SubName: Full=Uncharacterized protein {ECO:0000313|EnsemblPlants:TRIAE_CS42_5DL_TGACv1_433945_AA1425950.2};
TRINITY_DN13724_c0_g1_i10	tr|A0A1D6C738|A0A1D6C738_WHEAT	303	4.1e-135	490.7	47.1	A0A1D6C738_WHEAT	Uncharacterized protein	SubName: Full=Uncharacterized protein {ECO:0000313|EnsemblPlants:TRIAE_CS42_7BL_TGACv1_577873_AA1885000.3};
TRINITY_DN13724_c0_g1_i18	tr|A0A1D6CNQ2|A0A1D6CNQ2_WHEAT	406	3.9e-207	729.9	67.2	A0A1D6CNQ2_WHEAT	Uncharacterized protein	SubName: Full=Uncharacterized protein {ECO:0000313|EnsemblPlants:TRIAE_CS42_7DL_TGACv1_603102_AA1975940.1};
TRINITY_DN13724_c0_g1_i8	tr|A0A1D6CNQ2|A0A1D6CNQ2_WHEAT	428	1.2e-203	718.4	68.4	A0A1D6CNQ2_WHEAT	Uncharacterized protein	SubName: Full=Uncharacterized protein {ECO:0000313|EnsemblPlants:TRIAE_CS42_7DL_TGACv1_603102_AA1975940.1};
TRINITY_DN13724_c0_g1_i1	tr|A0A1D6CNQ2|A0A1D6CNQ2_WHEAT	428	5.7e-200	706.1	74.3	A0A1D6CNQ2_WHEAT	Uncharacterized protein	SubName: Full=Uncharacterized protein {ECO:0000313|EnsemblPlants:TRIAE_CS42_7DL_TGACv1_603102_AA1975940.1};
TRINITY_DN13724_c0_g1_i13	tr|A0A1D6CNQ2|A0A1D6CNQ2_WHEAT	265	1.2e-145	525.8	41.7	A0A1D6CNQ2_WHEAT	Uncharacterized protein	SubName: Full=Uncharacterized protein {ECO:0000313|EnsemblPlants:TRIAE_CS42_7DL_TGACv1_603102_AA1975940.1};
TRINITY_DN13724_c0_g1_i5	tr|A0A1D6CNQ2|A0A1D6CNQ2_WHEAT	434	1.2e-192	681.8	71.5	A0A1D6CNQ2_WHEAT	Uncharacterized protein	SubName: Full=Uncharacterized protein {ECO:0000313|EnsemblPlants:TRIAE_CS42_7DL_TGACv1_603102_AA1975940.1};
TRINITY_DN13724_c0_g1_i11	tr|A0A1D6BQW5|A0A1D6BQW5_WHEAT	271	3.4e-150	540.8	43.9	A0A1D6BQW5_WHEAT	Uncharacterized protein	SubName: Full=Uncharacterized protein {ECO:0000313|EnsemblPlants:TRIAE_CS42_7AL_TGACv1_558848_AA1796450.1};
TRINITY_DN13724_c0_g1_i7	tr|A0A1D6C738|A0A1D6C738_WHEAT	303	3.7e-138	500.7	51.1	A0A1D6C738_WHEAT	Uncharacterized protein	SubName: Full=Uncharacterized protein {ECO:0000313|EnsemblPlants:TRIAE_CS42_7BL_TGACv1_577873_AA1885000.3};
TRINITY_DN13724_c0_g1_i14	tr|A0A1D6CNQ2|A0A1D6CNQ2_WHEAT	406	2.6e-202	713.8	73.2	A0A1D6CNQ2_WHEAT	Uncharacterized protein	SubName: Full=Uncharacterized protein {ECO:0000313|EnsemblPlants:TRIAE_CS42_7DL_TGACv1_603102_AA1975940.1};
TRINITY_DN13724_c0_g1_i9	tr|A0A1D6BQW5|A0A1D6BQW5_WHEAT	155	1.4e-81	310.8	99.4	A0A1D6BQW5_WHEAT	Uncharacterized protein	SubName: Full=Uncharacterized protein {ECO:0000313|EnsemblPlants:TRIAE_CS42_7AL_TGACv1_558848_AA1796450.1};
TRINITY_DN13724_c0_g1_i6	tr|A0A1D6C737|A0A1D6C737_WHEAT	155	1.3e-82	314.3	99.4	A0A1D6C737_WHEAT	Uncharacterized protein	SubName: Full=Uncharacterized protein {ECO:0000313|EnsemblPlants:TRIAE_CS42_7BL_TGACv1_577873_AA1885000.2};
TRINITY_DN13724_c1_g1_i2	tr|A0A1D6BMG4|A0A1D6BMG4_WHEAT	112	1e-47	198	93.1	A0A1D6BMG4_WHEAT	Uncharacterized protein	SubName: Full=Uncharacterized protein {ECO:0000313|EnsemblPlants:TRIAE_CS42_7AL_TGACv1_557251_AA1778760.1};
TRINITY_DN13724_c1_g1_i1	tr|A0A1D6CL07|A0A1D6CL07_WHEAT	112	3.5e-48	199.5	96	A0A1D6CL07_WHEAT	Uncharacterized protein	SubName: Full=Uncharacterized protein {ECO:0000313|EnsemblPlants:TRIAE_CS42_7DL_TGACv1_602612_AA1962750.1};
TRINITY_DN13733_c0_g1_i1	tr|W5EM34|W5EM34_WHEAT	255	2.7e-113	417.2	86.4	W5EM34_WHEAT	Uncharacterized protein	SubName: Full=Uncharacterized protein {ECO:0000313|EnsemblPlants:TRIAE_CS42_4DL_TGACv1_343229_AA1131840.1};
TRINITY_DN13733_c0_g1_i2	tr|A0A1D5XLS6|A0A1D5XLS6_WHEAT	227	6.2e-100	372.9	72.5	A0A1D5XLS6_WHEAT	Uncharacterized protein	SubName: Full=Uncharacterized protein {ECO:0000313|EnsemblPlants:TRIAE_CS42_4BL_TGACv1_321675_AA1063970.1};
TRINITY_DN13733_c0_g1_i4	tr|A0A1D5XLS6|A0A1D5XLS6_WHEAT	258	2.7e-116	427.6	65.3	A0A1D5XLS6_WHEAT	Uncharacterized protein	SubName: Full=Uncharacterized protein {ECO:0000313|EnsemblPlants:TRIAE_CS42_4BL_TGACv1_321675_AA1063970.1};
TRINITY_DN13733_c0_g1_i3	tr|A0A1D5XLS6|A0A1D5XLS6_WHEAT	258	2.3e-116	427.6	75.4	A0A1D5XLS6_WHEAT	Uncharacterized protein	SubName: Full=Uncharacterized protein {ECO:0000313|EnsemblPlants:TRIAE_CS42_4BL_TGACv1_321675_AA1063970.1};
TRINITY_DN13739_c0_g1_i2	tr|A0A1D5WXC4|A0A1D5WXC4_WHEAT	73	1.2e-34	155.6	29.3	A0A1D5WXC4_WHEAT	Uncharacterized protein	SubName: Full=Uncharacterized protein {ECO:0000313|EnsemblPlants:TRIAE_CS42_3DS_TGACv1_279767_AA0937340.1};
TRINITY_DN13739_c0_g2_i2	tr|M7ZTC7|M7ZTC7_TRIUA	89	2.4e-10	76.3	13.8	M7ZTC7_TRIUA	Tryptophanyl-tRNA synthetase, cytoplasmic	SubName: Full=Tryptophanyl-tRNA synthetase, cytoplasmic {ECO:0000313|EMBL:EMS55590.1, ECO:0000313|EnsemblPlants:TRIUR3_17018-P1};
TRINITY_DN13739_c0_g2_i1	tr|M7ZTC7|M7ZTC7_TRIUA	33	3.6e-09	72.4	5	M7ZTC7_TRIUA	Tryptophanyl-tRNA synthetase, cytoplasmic	SubName: Full=Tryptophanyl-tRNA synthetase, cytoplasmic {ECO:0000313|EMBL:EMS55590.1, ECO:0000313|EnsemblPlants:TRIUR3_17018-P1};
TRINITY_DN13794_c0_g1_i6	tr|A0A1D5XS57|A0A1D5XS57_WHEAT	502	9.4e-237	828.2	92.4	A0A1D5XS57_WHEAT	Uncharacterized protein	SubName: Full=Uncharacterized protein {ECO:0000313|EnsemblPlants:TRIAE_CS42_4BS_TGACv1_328712_AA1092380.2};
TRINITY_DN13794_c0_g1_i2	tr|A0A1D6RZJ7|A0A1D6RZJ7_WHEAT	394	3.9e-218	766.1	80.8	A0A1D6RZJ7_WHEAT	Uncharacterized protein	SubName: Full=Uncharacterized protein {ECO:0000313|EnsemblPlants:TRIAE_CS42_4DL_TGACv1_343224_AA1131720.1};
TRINITY_DN13794_c0_g1_i7	tr|A0A1D5XS57|A0A1D5XS57_WHEAT	439	8.2e-247	861.7	75.1	A0A1D5XS57_WHEAT	Uncharacterized protein	SubName: Full=Uncharacterized protein {ECO:0000313|EnsemblPlants:TRIAE_CS42_4BS_TGACv1_328712_AA1092380.2};
TRINITY_DN13794_c0_g1_i3	tr|A0A1D5XS57|A0A1D5XS57_WHEAT	236	1.2e-123	451.4	89.4	A0A1D5XS57_WHEAT	Uncharacterized protein	SubName: Full=Uncharacterized protein {ECO:0000313|EnsemblPlants:TRIAE_CS42_4BS_TGACv1_328712_AA1092380.2};
TRINITY_DN13794_c0_g1_i1	tr|A0A1D5XS57|A0A1D5XS57_WHEAT	396	3.7e-219	769.6	78.5	A0A1D5XS57_WHEAT	Uncharacterized protein	SubName: Full=Uncharacterized protein {ECO:0000313|EnsemblPlants:TRIAE_CS42_4BS_TGACv1_328712_AA1092380.2};
TRINITY_DN13794_c0_g1_i4	tr|A0A1D6RZJ7|A0A1D6RZJ7_WHEAT	288	5.7e-159	569.3	72.7	A0A1D6RZJ7_WHEAT	Uncharacterized protein	SubName: Full=Uncharacterized protein {ECO:0000313|EnsemblPlants:TRIAE_CS42_4DL_TGACv1_343224_AA1131720.1};
TRINITY_DN13794_c0_g2_i1	tr|F2DZ34|F2DZ34_HORVV	377	1e-82	316.2	80.3	F2DZ34_HORVV	Predicted protein	SubName: Full=Predicted protein {ECO:0000313|EMBL:BAK00356.1}; Flags: Fragment;
TRINITY_DN13794_c0_g3_i1	tr|F2DUU1|F2DUU1_HORVV	45	1.5e-12	81.3	36.6	F2DUU1_HORVV	Predicted protein	SubName: Full=Predicted protein {ECO:0000313|EMBL:BAJ98862.1}; Flags: Fragment;
TRINITY_DN13794_c0_g4_i1	tr|A0A1D5XF41|A0A1D5XF41_WHEAT	44	3.4e-17	96.3	46.3	A0A1D5XF41_WHEAT	Uncharacterized protein	SubName: Full=Uncharacterized protein {ECO:0000313|EnsemblPlants:TRIAE_CS42_4AS_TGACv1_310505_AA1031530.1};
TRINITY_DN13752_c0_g1_i1	tr|M8B5T5|M8B5T5_AEGTA	87	2.3e-39	170.6	57.4	M8B5T5_AEGTA	Uncharacterized protein	SubName: Full=Uncharacterized protein {ECO:0000313|EMBL:EMT08970.1, ECO:0000313|EnsemblPlants:EMT08970};
TRINITY_DN13752_c0_g1_i3	tr|M8B5T5|M8B5T5_AEGTA	38	1.9e-10	75.1	16.8	M8B5T5_AEGTA	Uncharacterized protein	SubName: Full=Uncharacterized protein {ECO:0000313|EMBL:EMT08970.1, ECO:0000313|EnsemblPlants:EMT08970};
TRINITY_DN13752_c0_g1_i10	tr|M8B5T5|M8B5T5_AEGTA	87	5.7e-39	169.5	50.7	M8B5T5_AEGTA	Uncharacterized protein	SubName: Full=Uncharacterized protein {ECO:0000313|EMBL:EMT08970.1, ECO:0000313|EnsemblPlants:EMT08970};
TRINITY_DN13752_c0_g1_i12	tr|M8B5T5|M8B5T5_AEGTA	87	5e-39	169.5	58	M8B5T5_AEGTA	Uncharacterized protein	SubName: Full=Uncharacterized protein {ECO:0000313|EMBL:EMT08970.1, ECO:0000313|EnsemblPlants:EMT08970};
TRINITY_DN13752_c0_g1_i5	tr|M8B5T5|M8B5T5_AEGTA	38	7.6e-11	76.6	14.7	M8B5T5_AEGTA	Uncharacterized protein	SubName: Full=Uncharacterized protein {ECO:0000313|EMBL:EMT08970.1, ECO:0000313|EnsemblPlants:EMT08970};
TRINITY_DN13752_c0_g1_i16	tr|M8B5T5|M8B5T5_AEGTA	38	7.1e-11	76.6	15.7	M8B5T5_AEGTA	Uncharacterized protein	SubName: Full=Uncharacterized protein {ECO:0000313|EMBL:EMT08970.1, ECO:0000313|EnsemblPlants:EMT08970};
TRINITY_DN13752_c0_g1_i15	tr|A0A1D6DLK3|A0A1D6DLK3_WHEAT	36	2.5e-08	66.6	43.2	A0A1D6DLK3_WHEAT	Uncharacterized protein	SubName: Full=Uncharacterized protein {ECO:0000313|EnsemblPlants:TRIAE_CS42_U_TGACv1_647071_AA2147380.1};
TRINITY_DN13752_c0_g1_i8	tr|M8B5T5|M8B5T5_AEGTA	87	2e-39	171	50.2	M8B5T5_AEGTA	Uncharacterized protein	SubName: Full=Uncharacterized protein {ECO:0000313|EMBL:EMT08970.1, ECO:0000313|EnsemblPlants:EMT08970};
TRINITY_DN13752_c0_g1_i6	tr|M8B5T5|M8B5T5_AEGTA	38	7.4e-11	76.6	15.1	M8B5T5_AEGTA	Uncharacterized protein	SubName: Full=Uncharacterized protein {ECO:0000313|EMBL:EMT08970.1, ECO:0000313|EnsemblPlants:EMT08970};
TRINITY_DN13752_c0_g1_i9	tr|M8B5T5|M8B5T5_AEGTA	38	7.3e-11	76.6	15.3	M8B5T5_AEGTA	Uncharacterized protein	SubName: Full=Uncharacterized protein {ECO:0000313|EMBL:EMT08970.1, ECO:0000313|EnsemblPlants:EMT08970};
TRINITY_DN13752_c0_g1_i4	tr|M8B5T5|M8B5T5_AEGTA	38	1.1e-10	76.6	10	M8B5T5_AEGTA	Uncharacterized protein	SubName: Full=Uncharacterized protein {ECO:0000313|EMBL:EMT08970.1, ECO:0000313|EnsemblPlants:EMT08970};
TRINITY_DN13752_c0_g1_i11	tr|M8B5T5|M8B5T5_AEGTA	38	8.8e-13	82.8	17.6	M8B5T5_AEGTA	Uncharacterized protein	SubName: Full=Uncharacterized protein {ECO:0000313|EMBL:EMT08970.1, ECO:0000313|EnsemblPlants:EMT08970};
TRINITY_DN13779_c0_g1_i10	tr|A0A1D5UAA2|A0A1D5UAA2_WHEAT	321	9.3e-187	662.1	56.1	A0A1D5UAA2_WHEAT	tRNA (guanine(26)-N(2))-dimethyltransferase	RecName: Full=tRNA (guanine(26)-N(2))-dimethyltransferase {ECO:0000256|PROSITE-ProRule:PRU00958}; EC=2.1.1.216 {ECO:0000256|PROSITE-ProRule:PRU00958};
TRINITY_DN13779_c0_g1_i2	tr|A0A1D5UAA2|A0A1D5UAA2_WHEAT	421	1.5e-234	822	34.8	A0A1D5UAA2_WHEAT	tRNA (guanine(26)-N(2))-dimethyltransferase	RecName: Full=tRNA (guanine(26)-N(2))-dimethyltransferase {ECO:0000256|PROSITE-ProRule:PRU00958}; EC=2.1.1.216 {ECO:0000256|PROSITE-ProRule:PRU00958};
TRINITY_DN13779_c0_g1_i5	tr|A0A1D5UAA2|A0A1D5UAA2_WHEAT	321	9.3e-187	662.1	56.1	A0A1D5UAA2_WHEAT	tRNA (guanine(26)-N(2))-dimethyltransferase	RecName: Full=tRNA (guanine(26)-N(2))-dimethyltransferase {ECO:0000256|PROSITE-ProRule:PRU00958}; EC=2.1.1.216 {ECO:0000256|PROSITE-ProRule:PRU00958};
TRINITY_DN13779_c0_g1_i1	tr|A0A1D5UAA2|A0A1D5UAA2_WHEAT	369	2.3e-205	724.9	33	A0A1D5UAA2_WHEAT	tRNA (guanine(26)-N(2))-dimethyltransferase	RecName: Full=tRNA (guanine(26)-N(2))-dimethyltransferase {ECO:0000256|PROSITE-ProRule:PRU00958}; EC=2.1.1.216 {ECO:0000256|PROSITE-ProRule:PRU00958};
TRINITY_DN13779_c0_g1_i4	tr|A0A1D5UAA2|A0A1D5UAA2_WHEAT	421	1.4e-234	822	36	A0A1D5UAA2_WHEAT	tRNA (guanine(26)-N(2))-dimethyltransferase	RecName: Full=tRNA (guanine(26)-N(2))-dimethyltransferase {ECO:0000256|PROSITE-ProRule:PRU00958}; EC=2.1.1.216 {ECO:0000256|PROSITE-ProRule:PRU00958};
TRINITY_DN13779_c0_g1_i6	tr|A0A1D5UAA2|A0A1D5UAA2_WHEAT	421	1.4e-234	822	36.5	A0A1D5UAA2_WHEAT	tRNA (guanine(26)-N(2))-dimethyltransferase	RecName: Full=tRNA (guanine(26)-N(2))-dimethyltransferase {ECO:0000256|PROSITE-ProRule:PRU00958}; EC=2.1.1.216 {ECO:0000256|PROSITE-ProRule:PRU00958};
TRINITY_DN13779_c0_g1_i7	tr|A0A1D5V320|A0A1D5V320_WHEAT	209	1.1e-115	426.4	30	A0A1D5V320_WHEAT	tRNA (guanine(26)-N(2))-dimethyltransferase	RecName: Full=tRNA (guanine(26)-N(2))-dimethyltransferase {ECO:0000256|PROSITE-ProRule:PRU00958}; EC=2.1.1.216 {ECO:0000256|PROSITE-ProRule:PRU00958};
TRINITY_DN13779_c0_g1_i3	tr|A0A1D5TN54|A0A1D5TN54_WHEAT	503	5.7e-289	1001.5	99.8	A0A1D5TN54_WHEAT	tRNA (guanine(26)-N(2))-dimethyltransferase	RecName: Full=tRNA (guanine(26)-N(2))-dimethyltransferase {ECO:0000256|PROSITE-ProRule:PRU00958}; EC=2.1.1.216 {ECO:0000256|PROSITE-ProRule:PRU00958};
TRINITY_DN13779_c0_g1_i9	tr|A0A1D5V320|A0A1D5V320_WHEAT	502	7.5e-289	1001.1	99.8	A0A1D5V320_WHEAT	tRNA (guanine(26)-N(2))-dimethyltransferase	RecName: Full=tRNA (guanine(26)-N(2))-dimethyltransferase {ECO:0000256|PROSITE-ProRule:PRU00958}; EC=2.1.1.216 {ECO:0000256|PROSITE-ProRule:PRU00958};
TRINITY_DN13750_c0_g1_i5	tr|A0A1D5XJ44|A0A1D5XJ44_WHEAT	212	9.4e-108	399.1	57.9	A0A1D5XJ44_WHEAT	Uncharacterized protein	SubName: Full=Uncharacterized protein {ECO:0000313|EnsemblPlants:TRIAE_CS42_4BL_TGACv1_320953_AA1052350.1};
TRINITY_DN13750_c0_g1_i3	tr|A0A1D5YG06|A0A1D5YG06_WHEAT	206	4.1e-110	406.4	81.4	A0A1D5YG06_WHEAT	Uncharacterized protein	SubName: Full=Uncharacterized protein {ECO:0000313|EnsemblPlants:TRIAE_CS42_5AL_TGACv1_374803_AA1209250.1};
TRINITY_DN13750_c0_g1_i1	tr|W5EIV6|W5EIV6_WHEAT	210	3.5e-106	394	49.2	W5EIV6_WHEAT	Uncharacterized protein	SubName: Full=Uncharacterized protein {ECO:0000313|EnsemblPlants:TRIAE_CS42_4DL_TGACv1_343189_AA1131280.1};
TRINITY_DN13750_c0_g1_i4	tr|W5EIV6|W5EIV6_WHEAT	210	1.2e-106	395.6	51.1	W5EIV6_WHEAT	Uncharacterized protein	SubName: Full=Uncharacterized protein {ECO:0000313|EnsemblPlants:TRIAE_CS42_4DL_TGACv1_343189_AA1131280.1};
TRINITY_DN13750_c0_g1_i2	tr|W5EIV6|W5EIV6_WHEAT	210	5.7e-112	413.3	48.6	W5EIV6_WHEAT	Uncharacterized protein	SubName: Full=Uncharacterized protein {ECO:0000313|EnsemblPlants:TRIAE_CS42_4DL_TGACv1_343189_AA1131280.1};
TRINITY_DN13798_c0_g1_i1	tr|E9KJ86|E9KJ86_9ORYZ	89	3.6e-44	188	22.3	E9KJ86_9ORYZ	DNA-directed RNA polymerase subunit beta'; PEP; Plastid-encoded RNA polymerase subunit beta'; RNA polymerase subunit beta'	RecName: Full=DNA-directed RNA polymerase subunit beta' {ECO:0000256|HAMAP-Rule:MF_01323}; EC=2.7.7.6 {ECO:0000256|HAMAP-Rule:MF_01323}; AltName: Full=PEP {ECO:0000256|HAMAP-Rule:MF_01323}; AltName: Full=Plastid-encoded RNA polymerase subunit beta' {ECO:0000256|HAMAP-Rule:MF_01323}; Short=RNA polymerase subunit beta' {ECO:0000256|HAMAP-Rule:MF_01323};
TRINITY_DN13798_c0_g1_i2	tr|A0A1D5W8Q2|A0A1D5W8Q2_WHEAT	180	1.2e-71	279.3	45	A0A1D5W8Q2_WHEAT	Uncharacterized protein	SubName: Full=Uncharacterized protein {ECO:0000313|EnsemblPlants:TRIAE_CS42_3B_TGACv1_225876_AA0812580.1};
TRINITY_DN13718_c0_g1_i1	tr|W5FF98|W5FF98_WHEAT	282	1.4e-168	601.7	53.6	W5FF98_WHEAT	Uncharacterized protein	SubName: Full=Uncharacterized protein {ECO:0000313|EnsemblPlants:TRIAE_CS42_5BL_TGACv1_404668_AA1307850.1};
TRINITY_DN13718_c0_g1_i3	tr|W5FF98|W5FF98_WHEAT	314	9.1e-164	585.5	67.1	W5FF98_WHEAT	Uncharacterized protein	SubName: Full=Uncharacterized protein {ECO:0000313|EnsemblPlants:TRIAE_CS42_5BL_TGACv1_404668_AA1307850.1};
TRINITY_DN13718_c0_g1_i2	tr|W5F218|W5F218_WHEAT	282	5.8e-167	596.3	53.7	W5F218_WHEAT	Uncharacterized protein	SubName: Full=Uncharacterized protein {ECO:0000313|EnsemblPlants:TRIAE_CS42_5AL_TGACv1_374534_AA1202550.1};
TRINITY_DN13718_c0_g2_i1	tr|A0A287G2S4|A0A287G2S4_HORVV	663	0	1088.6	70.7	A0A287G2S4_HORVV	Uncharacterized protein	SubName: Full=Uncharacterized protein {ECO:0000313|EnsemblPlants:HORVU1Hr1G068860.1};
TRINITY_DN13718_c0_g2_i2	tr|A0A287G2S4|A0A287G2S4_HORVV	769	2.7e-301	1043.5	73.7	A0A287G2S4_HORVV	Uncharacterized protein	SubName: Full=Uncharacterized protein {ECO:0000313|EnsemblPlants:HORVU1Hr1G068860.1};
TRINITY_DN13736_c0_g1_i3	tr|W5B2W9|W5B2W9_WHEAT	66	4.2e-25	123.6	32.4	W5B2W9_WHEAT	Uncharacterized protein	SubName: Full=Uncharacterized protein {ECO:0000313|EnsemblPlants:TRIAE_CS42_2AS_TGACv1_112071_AA0329520.1};
TRINITY_DN13736_c0_g1_i2	tr|W5B2W9|W5B2W9_WHEAT	66	6.2e-25	123.2	29.1	W5B2W9_WHEAT	Uncharacterized protein	SubName: Full=Uncharacterized protein {ECO:0000313|EnsemblPlants:TRIAE_CS42_2AS_TGACv1_112071_AA0329520.1};
TRINITY_DN13736_c0_g1_i1	tr|W5B2W9|W5B2W9_WHEAT	66	4.5e-25	123.6	31	W5B2W9_WHEAT	Uncharacterized protein	SubName: Full=Uncharacterized protein {ECO:0000313|EnsemblPlants:TRIAE_CS42_2AS_TGACv1_112071_AA0329520.1};
TRINITY_DN13766_c0_g1_i11	tr|A0A1D6BVC1|A0A1D6BVC1_WHEAT	348	2e-189	671	61.8	A0A1D6BVC1_WHEAT	Uncharacterized protein	SubName: Full=Uncharacterized protein {ECO:0000313|EnsemblPlants:TRIAE_CS42_7AS_TGACv1_569748_AA1823260.1};
TRINITY_DN13766_c0_g1_i8	tr|A0A1D5WY55|A0A1D5WY55_WHEAT	392	5.4e-186	659.8	58.5	A0A1D5WY55_WHEAT	Uncharacterized protein	SubName: Full=Uncharacterized protein {ECO:0000313|EnsemblPlants:TRIAE_CS42_4AL_TGACv1_288251_AA0942440.1};
TRINITY_DN13766_c0_g1_i2	tr|W5HHW4|W5HHW4_WHEAT	218	2.7e-118	433.3	99.8	W5HHW4_WHEAT	Uncharacterized protein	SubName: Full=Uncharacterized protein {ECO:0000313|EnsemblPlants:TRIAE_CS42_7AS_TGACv1_569748_AA1823280.1};
TRINITY_DN13766_c0_g1_i7	tr|A0A1D6D5J3|A0A1D6D5J3_WHEAT	368	1.6e-171	611.3	75.7	A0A1D6D5J3_WHEAT	Uncharacterized protein	SubName: Full=Uncharacterized protein {ECO:0000313|EnsemblPlants:TRIAE_CS42_7DS_TGACv1_624730_AA2062980.1};
TRINITY_DN13766_c0_g1_i9	tr|A0A287VNJ8|A0A287VNJ8_HORVV	418	6.6e-174	619.4	76.8	A0A287VNJ8_HORVV	Uncharacterized protein	SubName: Full=Uncharacterized protein {ECO:0000313|EnsemblPlants:HORVU7Hr1G021840.22};
TRINITY_DN13766_c0_g1_i14	tr|A0A1D5WY55|A0A1D5WY55_WHEAT	151	3.7e-77	297	56.5	A0A1D5WY55_WHEAT	Uncharacterized protein	SubName: Full=Uncharacterized protein {ECO:0000313|EnsemblPlants:TRIAE_CS42_4AL_TGACv1_288251_AA0942440.1};
TRINITY_DN13766_c0_g1_i5	tr|W5HHW4|W5HHW4_WHEAT	218	2.7e-118	433.3	99.8	W5HHW4_WHEAT	Uncharacterized protein	SubName: Full=Uncharacterized protein {ECO:0000313|EnsemblPlants:TRIAE_CS42_7AS_TGACv1_569748_AA1823280.1};
TRINITY_DN13766_c0_g1_i1	tr|A0A1D5WY55|A0A1D5WY55_WHEAT	392	5.7e-186	659.8	55.4	A0A1D5WY55_WHEAT	Uncharacterized protein	SubName: Full=Uncharacterized protein {ECO:0000313|EnsemblPlants:TRIAE_CS42_4AL_TGACv1_288251_AA0942440.1};
[truncated: 131,787 more rows]
