# Supplementary material for: Insight into the mechanisms of terminal HS-tolerance in wheat mutant with improved nutritional quality through de novo transcriptome sequencing
Source: Research Square preprint supplement (doi:10.21203/rs.3.rs-241832/v1), 2021-02-26
Supplement: Supplementary file 10 [file a10d930ca205c3d86eb37bec.xlsx]

## Sheet: Upregulated_M_vs_P
	Insight into the mechanisms of terminal HS-tolerance in wheat mutant with improved nutritional quality through de novo transcriptome sequencing Ranjeet R. Kumar, Suman Bakshi, Kavita Dubey, Sumedha Hasija, Gyanendra K. Rai, Neelu Jain, Sanjay Jambhulkar, Bhupinder Singh, Gyanendra P. Singh, & Shelly Praveen
	Table S6 List of differentially expressed transcripts (upregulated) in mutant over parent identified through de novo transcriptome sequencing using Illumina HiSeq 4000
	S. No.	logFC	PValue	FDR	DEGType	Trinity_GeneID	Wheat_Transcript_ID	Transcript_Start	Transcript_End	Transcript length	E value	Wheat_Gene_ID	Chromosome	Gene_Start	Gene_End	Description/Protein Name
	TRINITY_DN6079_c0_g1	15.7517	4.43e-14	2.48e-12	UP	TRINITY_DN6079_c0_g1	TraesCS3A01G004300.1	65	249	249	7.45e-88	TraesCS3A01G004300	chr3A	2604526	2604896	Glutamate--cysteine ligase
	TRINITY_DN4553_c0_g1	14.927	2.62e-35	3.35e-32	UP	NA	NA	NA	NA	NA	NA	NA	NA	NA	NA	NA
	TRINITY_DN18979_c0_g1	14.5661	8.93e-21	1.34e-18	UP	TRINITY_DN18979_c0_g1	TraesCS7A01G040400.1	444	720	843	2.16e-139	TraesCS7A01G040400	chr7A	18738412	18739728	Acid phosphatase 1
	TRINITY_DN36713_c0_g1	14.4531	6.17e-51	1.12e-46	UP	TRINITY_DN36713_c0_g1	TraesCS7D01G507600.1	2054	2328	2328	3.5e-143	TraesCS7D01G507600	chr7D	611719067	611723410	Pyrophosphate-energized vacuolar membrane proton pump
	TRINITY_DN137233_c2_g1	14.15	1.36e-41	3.66e-38	UP	TRINITY_DN137233_c2_g1	TraesCS2D01G468200.1	1345	1734	1734	0	TraesCS2D01G468200	chr2D	572952347	572954307	Polyphenol oxidase
	TRINITY_DN61683_c1_g1	13.4752	2.79e-48	2.3e-44	UP	TRINITY_DN61683_c1_g1	TraesCS7B01G329800.1	358	151	558	3.58e-106	TraesCS7B01G329800	chr7B	585461233	585461889	3-oxoacyl-[acyl-carrier-protein] synthase
	TRINITY_DN36499_c0_g1	13.1799	2.2e-42	7.14e-39	UP	TRINITY_DN36499_c0_g1	TraesCS7D01G549800.1	18	292	921	2.77e-103	TraesCS7D01G549800	chr7D	634411229	634412149	Glucuronoxylan 4-O-methyltransferase
	TRINITY_DN15817_c0_g2	13.0458	3.95e-45	2.24e-41	UP	TRINITY_DN15817_c0_g2	TraesCS5A01G542400.1	778	993	1137	1.32e-110	TraesCS5A01G542400	chr5A	698498269	698501511	Alcohol dehydrogenase
	TRINITY_DN137233_c3_g1	13.0089	1.94e-43	9.77e-40	UP	TRINITY_DN137233_c3_g1	TraesCS2D01G468200.1	1390	1179	1734	2.16e-108	TraesCS2D01G468200	chr2D	572952347	572954307	Polyphenol oxidase
	TRINITY_DN9001_c0_g1	12.8411	2.14e-43	1.02e-39	UP	TRINITY_DN9001_c0_g1	TraesCS7D01G315500.1	1	279	1011	1.74e-145	TraesCS7D01G315500	chr7D	401549892	401552124	Fructokinase-2
	TRINITY_DN6085_c0_g1	12.7676	1.08e-42	3.91e-39	UP	NA	NA	NA	NA	NA	NA	NA	NA	NA	NA	NA
	TRINITY_DN437_c5_g1	12.7416	1.36e-42	4.57e-39	UP	TRINITY_DN437_c5_g1	TraesCS6B01G367800.1	810	1080	1944	1.51e-63	TraesCS6B01G367800	chr6B	641409252	641412893	70 kDa heat shock protein
	TRINITY_DN31823_c0_g5	12.6996	1.26e-41	3.57e-38	UP	NA	NA	NA	NA	NA	NA	NA	NA	NA	NA	NA
	TRINITY_DN7369_c0_g1	12.6802	4.69e-41	1.18e-37	UP	NA	NA	NA	NA	NA	NA	NA	NA	NA	NA	NA
	TRINITY_DN4793_c0_g1	12.6764	4.81e-42	1.51e-38	UP	TRINITY_DN4793_c0_g1	TraesCS7B01G460400.1	1947	2168	2400	6.32e-60	TraesCS7B01G460400	chr7B	717879399	717894869	receptor kinase 1
	TRINITY_DN26992_c1_g1	12.6736	4.38e-25	1.3e-22	UP	NA	NA	NA	NA	NA	NA	NA	NA	NA	NA	NA
	TRINITY_DN12961_c0_g1	12.6026	3.67e-25	1.1e-22	UP	TRINITY_DN12961_c0_g1	TraesCS7D01G418600.1	1	126	960	1.72e-60	TraesCS7D01G418600	chr7D	538139579	538140955	Xyloglucan endotransglucosylase/hydrolase
	TRINITY_DN25126_c0_g4	12.489	1.78e-27	7.78e-25	UP	TRINITY_DN25126_c0_g4	TraesCS3B01G011900.1	500	570	570	1.08e-29	TraesCS3B01G011900	chr3B	5322076	5323635	50S ribosomal protein L6
	TRINITY_DN68088_c0_g1	12.4662	3.04e-38	5.64e-35	UP	TRINITY_DN68088_c0_g1	TraesCS7D01G365600.1	997	1235	2085	2.47e-108	TraesCS7D01G365600	chr7D	472287842	472294012	Poly(A) polymerase
	TRINITY_DN7594_c0_g1	12.4464	4.5e-39	9.5e-36	UP	NA	NA	NA	NA	NA	NA	NA	NA	NA	NA	NA
	TRINITY_DN426_c0_g2	12.3868	7.92e-34	8.13e-31	UP	TRINITY_DN426_c0_g2	TraesCS7D01G543700.1	1559	1650	1650	9.18e-40	TraesCS7D01G543700	chr7D	631998137	632001532	Signal peptide peptidase-like protein
	TRINITY_DN1271_c1_g3	12.3822	4.27e-28	2.05e-25	UP	NA	NA	NA	NA	NA	NA	NA	NA	NA	NA	NA
	TRINITY_DN1085_c1_g2	12.3367	5.07e-37	7.93e-34	UP	NA	NA	NA	NA	NA	NA	NA	NA	NA	NA	NA
	TRINITY_DN42669_c0_g1	12.3143	4.03e-38	7.18e-35	UP	TRINITY_DN42669_c0_g1	TraesCS7D01G428400.1	1	117	471	6.36e-54	TraesCS7D01G428400	chr7D	548781566	548782036	Histone H2A
	TRINITY_DN6195_c1_g1	12.3022	9.3e-38	1.62e-34	UP	TRINITY_DN6195_c1_g1	TraesCS2A01G388800.1	469	386	1149	4.11e-33	TraesCS2A01G388800	chr2A	636904233	636910541	Formin-like protein
	TRINITY_DN28882_c1_g1	12.2725	2.75e-37	4.53e-34	UP	TRINITY_DN28882_c1_g1	TraesCS3A01G010000.1	1153	948	1188	2.14e-93	TraesCS3A01G010000	chr3A	8863515	8865396	TPX2 (Targeting protein for Xklp2) family protein
	TRINITY_DN72167_c0_g2	12.2343	3.74e-37	5.95e-34	UP	NA	NA	NA	NA	NA	NA	NA	NA	NA	NA	NA
	TRINITY_DN103587_c0_g1	12.2268	9.12e-37	1.38e-33	UP	NA	NA	NA	NA	NA	NA	NA	NA	NA	NA	NA
	TRINITY_DN3076_c3_g1	12.2081	1.63e-34	1.77e-31	UP	NA	NA	NA	NA	NA	NA	NA	NA	NA	NA	NA
	TRINITY_DN15629_c0_g1	12.2064	1.66e-36	2.43e-33	UP	NA	NA	NA	NA	NA	NA	NA	NA	NA	NA	NA
	TRINITY_DN5472_c1_g3	12.1889	1.05e-35	1.44e-32	UP	NA	NA	NA	NA	NA	NA	NA	NA	NA	NA	NA
	TRINITY_DN7140_c0_g1	12.1854	1.32e-36	1.96e-33	UP	NA	NA	NA	NA	NA	NA	NA	NA	NA	NA	NA
	TRINITY_DN18193_c1_g1	12.1516	9.28e-26	3.13e-23	UP	TRINITY_DN18193_c1_g1	TraesCS2D01G508800.1	1640	1438	2010	2.07e-103	TraesCS2D01G508800	chr2D	601596482	601601810	Sulfate transporter
	TRINITY_DN5284_c1_g1	12.1229	4.56e-36	6.37e-33	UP	TRINITY_DN5284_c1_g1	TraesCS2D01G503200.1	28	660	660	0	TraesCS2D01G503200	chr2D	597939532	597942927	Glutathione S-transferase
	TRINITY_DN597_c0_g1	12.0969	1.52e-34	1.67e-31	UP	NA	NA	NA	NA	NA	NA	NA	NA	NA	NA	NA
	TRINITY_DN9310_c2_g1	12.0874	1.11e-35	1.5e-32	UP	NA	NA	NA	NA	NA	NA	NA	NA	NA	NA	NA
	TRINITY_DN44412_c0_g2	12.0812	1.26e-35	1.68e-32	UP	NA	NA	NA	NA	NA	NA	NA	NA	NA	NA	NA
	TRINITY_DN20349_c0_g1	12.0762	9.46e-26	3.17e-23	UP	NA	NA	NA	NA	NA	NA	NA	NA	NA	NA	NA
	TRINITY_DN1316_c0_g1	12.0663	1.76e-30	1.17e-27	UP	TRINITY_DN1316_c0_g1	TraesCS7D01G545800.1	3323	3773	3954	3.24e-129	TraesCS7D01G545800	chr7D	632801275	632820118	receptor kinase 1
	TRINITY_DN3156_c1_g2	12.0535	1.49e-27	6.54e-25	UP	TRINITY_DN3156_c1_g2	TraesCS6D01G004600.2	546	695	1017	1.24e-51	TraesCS6D01G004600	chr6D	2169671	2171595	Protein disulfide-isomerase
	TRINITY_DN10160_c0_g1	12.0528	9.24e-35	1.09e-31	UP	TRINITY_DN10160_c0_g1	TraesCS7B01G331200.2	1	615	615	0	TraesCS7B01G331200	chr7B	586631196	586632010	protease Do-like protein
	TRINITY_DN189749_c0_g1	12.01	1.34e-34	1.52e-31	UP	TRINITY_DN189749_c0_g1	TraesCS7D01G294100.1	132	1	339	6.48e-64	TraesCS7D01G294100	chr7D	365318801	365322424	NADH dehydrogenase [ubiquinone] iron-sulfur protein 6, mitochondrial
	TRINITY_DN26155_c0_g2	12.0025	3.31e-33	3.1e-30	UP	TRINITY_DN26155_c0_g2	TraesCSU01G020600.1	1557	1831	2082	1.34e-111	TraesCSU01G020600	chrUn	22432971	22436549	Receptor-like protein kinase
	TRINITY_DN33212_c0_g2	11.9738	9.48e-34	9.46e-31	UP	TRINITY_DN33212_c0_g2	TraesCS2A01G248800.1	1307	1114	1380	1.13e-96	TraesCS2A01G248800	chr2A	372734857	372737383	Fasciclin-like arabinogalactan protein
	TRINITY_DN39482_c0_g3	11.953	8.58e-30	5.26e-27	UP	NA	NA	NA	NA	NA	NA	NA	NA	NA	NA	NA
	TRINITY_DN43215_c0_g3	11.939	1.03e-30	7.07e-28	UP	TRINITY_DN43215_c0_g3	TraesCS5D01G194200.1	258	438	516	4.03e-66	TraesCS5D01G194200	chr5D	298134937	298138059	B3 domain-containing protein
	TRINITY_DN2552_c1_g1	11.9332	3.09e-20	4.24e-18	UP	TRINITY_DN2552_c1_g1	TraesCS7D01G036700.1	986	3060	3300	0	TraesCS7D01G036700	chr7D	18691439	18695264	Receptor-like protein kinase
	TRINITY_DN7148_c3_g1	11.9149	1.87e-33	1.83e-30	UP	NA	NA	NA	NA	NA	NA	NA	NA	NA	NA	NA
	TRINITY_DN19050_c2_g1	11.8943	4.06e-33	3.76e-30	UP	TRINITY_DN19050_c2_g1	TraesCS2A01G002800.1	693	1081	1521	3.9e-148	TraesCS2A01G002800	chr2A	1776725	1778245	Cytochrome P450 family protein, expressed
	TRINITY_DN8141_c0_g4	11.8709	3.05e-33	2.88e-30	UP	TRINITY_DN8141_c0_g4	TraesCS2A01G361100.2	894	851	894	7.31e-13	TraesCS2A01G361100	chr2A	605164949	605171281	Disease resistance protein (NBS-LRR class) family
	TRINITY_DN19143_c0_g2	11.8671	4.23e-33	3.88e-30	UP	NA	NA	NA	NA	NA	NA	NA	NA	NA	NA	NA
	TRINITY_DN68271_c0_g2	11.8326	2.25e-32	1.87e-29	UP	TRINITY_DN68271_c0_g2	TraesCS4B01G398400.1	2118	1994	2118	1.34e-45	TraesCS4B01G398400	chr4B	672296565	672305318	Kinase
	TRINITY_DN31189_c0_g2	11.8204	2.18e-32	1.85e-29	UP	NA	NA	NA	NA	NA	NA	NA	NA	NA	NA	NA
	TRINITY_DN14987_c0_g2	11.8137	2.07e-32	1.79e-29	UP	TRINITY_DN14987_c0_g2	TraesCS6B01G442900.1	518	730	1557	6.35e-74	TraesCS6B01G442900	chr6B	706324653	706333117	Receptor-like protein kinase
	TRINITY_DN66042_c1_g1	11.7852	6.38e-16	4.8e-14	UP	TRINITY_DN66042_c1_g1	TraesCS5A01G551300.1	681	467	1035	4.72e-110	TraesCS5A01G551300	chr5A	704833104	704835243	Peptidoglycan-binding LysM domain protein, putative
	TRINITY_DN41538_c0_g1	11.7829	2.91e-08	6.78e-07	UP	TRINITY_DN41538_c0_g1	TraesCS7A01G556800.1	2215	2271	2271	4.6e-22	TraesCS7A01G556800	chr7A	727848188	727850735	Monosaccharide-sensing protein 2
	TRINITY_DN10402_c0_g4	11.7362	2.13e-25	6.72e-23	UP	NA	NA	NA	NA	NA	NA	NA	NA	NA	NA	NA
	TRINITY_DN10242_c0_g1	11.7302	7.06e-32	5.67e-29	UP	TRINITY_DN10242_c0_g1	TraesCS1B01G005100.3	136	971	2733	2.14e-175	TraesCS1B01G005100	chr1B	3171426	3176156	E3 ubiquitin-protein ligase SINA-like 10
	TRINITY_DN5570_c0_g3	11.7045	3.58e-25	1.08e-22	UP	NA	NA	NA	NA	NA	NA	NA	NA	NA	NA	NA
	TRINITY_DN3408_c4_g1	11.6723	3.51e-29	2.02e-26	UP	NA	NA	NA	NA	NA	NA	NA	NA	NA	NA	NA
	TRINITY_DN7712_c0_g1	11.6134	4.55e-29	2.6e-26	UP	NA	NA	NA	NA	NA	NA	NA	NA	NA	NA	NA
	TRINITY_DN12520_c1_g1	11.6096	3.22e-28	1.57e-25	UP	TRINITY_DN12520_c1_g1	TraesCS3D01G002000.1	955	1044	1044	3.92e-32	TraesCS3D01G002000	chr3D	926270	929262	RNA polymerase II-associated factor 1
	TRINITY_DN6026_c0_g2	11.5965	1.03e-30	7.07e-28	UP	TRINITY_DN6026_c0_g2	TraesCS4B01G228000.1	1223	1284	1416	3.14e-21	TraesCS4B01G228000	chr4B	476854821	476858260	Senescence/dehydration-associated protein-like protein
	TRINITY_DN369_c0_g1	11.5841	4.31e-13	2.08e-11	UP	TRINITY_DN369_c0_g1	TraesCS4A01G448400.1	1137	1842	1842	0	TraesCS4A01G448400	chr4A	714946807	714949180	NBS-LRR disease resistance protein
	TRINITY_DN35253_c0_g1	11.5808	2.02e-30	1.34e-27	UP	NA	NA	NA	NA	NA	NA	NA	NA	NA	NA	NA
	TRINITY_DN9559_c2_g1	11.5737	1.05e-15	7.67e-14	UP	NA	NA	NA	NA	NA	NA	NA	NA	NA	NA	NA
	TRINITY_DN4498_c1_g1	11.5561	6.25e-30	3.86e-27	UP	TRINITY_DN4498_c1_g1	TraesCS7B01G331700.1	1	441	441	0	TraesCS7B01G331700	chr7B	586748610	586750570	Extracellular matrix-binding protein EbhA
	TRINITY_DN84325_c0_g1	11.5509	7.77e-27	3.13e-24	UP	NA	NA	NA	NA	NA	NA	NA	NA	NA	NA	NA
	TRINITY_DN3772_c2_g1	11.5028	1.85e-26	7e-24	UP	TRINITY_DN3772_c2_g1	TraesCS1B01G473900.1	94	358	360	1.33e-132	TraesCS1B01G473900	chr1B	681847664	681850883	Acetyl-CoA:benzylalcohol acetyltranferase
	TRINITY_DN70209_c1_g1	11.487	2.92e-25	8.98e-23	UP	NA	NA	NA	NA	NA	NA	NA	NA	NA	NA	NA
	TRINITY_DN178863_c0_g1	11.4839	6.45e-20	8.45e-18	UP	TRINITY_DN178863_c0_g1	TraesCS7A01G174400.1	1	166	252	6.14e-79	TraesCS7A01G174400	chr7A	128392957	128394102	Disease resistance protein (TIR-NBS-LRR class) family
	TRINITY_DN594_c0_g3	11.4783	1.01e-28	5.35e-26	UP	NA	NA	NA	NA	NA	NA	NA	NA	NA	NA	NA
	TRINITY_DN61366_c0_g2	11.4715	2.35e-26	8.68e-24	UP	TRINITY_DN61366_c0_g2	TraesCSU01G185800.1	846	918	918	7.03e-31	TraesCSU01G185800	chrUn	279914470	279915596	Cysteine protease
	TRINITY_DN8673_c1_g1	11.4639	2.14e-28	1.08e-25	UP	NA	NA	NA	NA	NA	NA	NA	NA	NA	NA	NA
	TRINITY_DN6803_c0_g2	11.4404	6.22e-28	2.86e-25	UP	NA	NA	NA	NA	NA	NA	NA	NA	NA	NA	NA
	TRINITY_DN77382_c1_g1	11.4394	3.03e-29	1.76e-26	UP	TRINITY_DN77382_c1_g1	TraesCS5B01G351900.1	1006	1306	1578	1.07e-157	TraesCS5B01G351900	chr5B	531703931	531707697	Serine protease HTRA1
	TRINITY_DN147546_c0_g2	11.4118	5.25e-28	2.46e-25	UP	NA	NA	NA	NA	NA	NA	NA	NA	NA	NA	NA
	TRINITY_DN15940_c0_g1	11.4023	7.16e-29	4.04e-26	UP	NA	NA	NA	NA	NA	NA	NA	NA	NA	NA	NA
	TRINITY_DN56595_c0_g2	11.3929	9.7e-29	5.21e-26	UP	TRINITY_DN56595_c0_g2	TraesCS7D01G548000.1	2310	2236	2310	3.54e-32	TraesCS7D01G548000	chr7D	633602388	633608245	Prolyl oligopeptidase family protein
	TRINITY_DN52470_c0_g3	11.3789	1.02e-26	4.04e-24	UP	TRINITY_DN52470_c0_g3	TraesCS5B01G209100.1	1491	1231	1551	3.85e-52	TraesCS5B01G209100	chr5B	378851260	378853282	Cytochrome P450
	TRINITY_DN70969_c2_g1	11.3625	2.66e-28	1.32e-25	UP	NA	NA	NA	NA	NA	NA	NA	NA	NA	NA	NA
	TRINITY_DN5553_c0_g1	11.3603	9.85e-28	4.45e-25	UP	TRINITY_DN5553_c0_g1	TraesCS6D01G014800.1	485	844	1149	3.9e-100	TraesCS6D01G014800	chr6D	6156258	6159148	O-acyltransferase WSD1
	TRINITY_DN7452_c0_g2	11.3555	2.76e-26	1.01e-23	UP	TRINITY_DN7452_c0_g2	TraesCSU01G038400.1	121	1	1017	9.37e-58	TraesCSU01G038400	chrUn	31688902	31690396	ATP synthase subunit alpha, chloroplastic
	TRINITY_DN4496_c6_g2	11.3467	1.47e-26	5.61e-24	UP	NA	NA	NA	NA	NA	NA	NA	NA	NA	NA	NA
	TRINITY_DN79641_c1_g1	11.3458	9.41e-22	1.62e-19	UP	NA	NA	NA	NA	NA	NA	NA	NA	NA	NA	NA
	TRINITY_DN11196_c0_g1	11.3432	2.46e-28	1.23e-25	UP	TRINITY_DN11196_c0_g1	TraesCS7A01G567500.1	5106	5235	5253	1.08e-50	TraesCS7A01G567500	chr7A	736088791	736096134	NBS-LRR disease resistance protein
	TRINITY_DN15137_c0_g1	11.3321	4.32e-28	2.06e-25	UP	NA	NA	NA	NA	NA	NA	NA	NA	NA	NA	NA
	TRINITY_DN18335_c0_g1	11.3285	5.76e-27	2.36e-24	UP	TRINITY_DN18335_c0_g1	TraesCS2A01G429800.1	1984	1635	2310	3.44e-173	TraesCS2A01G429800	chr2A	683012086	683014787	Pre-mRNA-splicing factor CWC21
	TRINITY_DN49188_c0_g1	11.318	4.83e-27	2.01e-24	UP	TRINITY_DN49188_c0_g1	TraesCS4A01G023300.1	409	506	705	8.18e-38	TraesCS4A01G023300	chr4A	16501475	16502784	Annexin
	TRINITY_DN22529_c0_g1	11.3133	3.46e-22	6.34e-20	UP	TRINITY_DN22529_c0_g1	TraesCS4A01G485900.1	1092	1300	1947	4.64e-100	TraesCS4A01G485900	chr4A	739310325	739313661	Beta-fructofuranosidase 1
	TRINITY_DN60594_c0_g1	11.3046	1.18e-26	4.59e-24	UP	TRINITY_DN60594_c0_g1	TraesCS5D01G367300.1	48	241	1917	1.57e-64	TraesCS5D01G367300	chr5D	443634726	443638476	Tetratricopeptide repeat (TPR)-like superfamily protein
	TRINITY_DN190070_c0_g1	11.3017	2.96e-25	9.08e-23	UP	TRINITY_DN190070_c0_g1	TraesCS2D01G525700.1	877	972	972	1.32e-43	TraesCS2D01G525700	chr2D	613445836	613447986	translation initiation factor 3 subunit I
	TRINITY_DN4326_c0_g2	11.2881	3.41e-25	1.03e-22	UP	NA	NA	NA	NA	NA	NA	NA	NA	NA	NA	NA
	TRINITY_DN15201_c1_g1	11.2875	6.32e-06	9.36e-05	UP	NA	NA	NA	NA	NA	NA	NA	NA	NA	NA	NA
	TRINITY_DN23243_c0_g1	11.279	2.98e-23	6.54e-21	UP	NA	NA	NA	NA	NA	NA	NA	NA	NA	NA	NA
	TRINITY_DN7757_c5_g1	11.2572	1.75e-27	7.68e-25	UP	TRINITY_DN7757_c5_g1	TraesCS2A01G484400.1	197	56	498	2.13e-47	TraesCS2A01G484400	chr2A	719548223	719561160	cytochrome P450, family 71, subfamily A, polypeptide 14
	TRINITY_DN15560_c1_g1	11.2513	6.22e-27	2.53e-24	UP	TRINITY_DN15560_c1_g1	TraesCS2A01G012100.1	1	66	459	7.32e-24	TraesCS2A01G012100	chr2A	4674196	4674654	P-loop containing nucleoside triphosphate hydrolases superfamily protein
	TRINITY_DN5442_c0_g3	11.249	4.9e-27	2.03e-24	UP	NA	NA	NA	NA	NA	NA	NA	NA	NA	NA	NA
	TRINITY_DN19773_c0_g1	11.2462	1.67e-17	1.58e-15	UP	TRINITY_DN19773_c0_g1	TraesCS7D01G549400.1	331	538	987	3.54e-106	TraesCS7D01G549400	chr7D	634175562	634177828	Peptidoglycan-binding LysM domain protein, putative
	TRINITY_DN16530_c0_g3	11.2392	1.73e-17	1.63e-15	UP	TRINITY_DN16530_c0_g3	TraesCS3D01G398300.1	525	1164	1350	8.63e-77	TraesCS3D01G398300	chr3D	512907545	512909139	Aspartic proteinase nepenthesin-1
	TRINITY_DN20082_c0_g1	11.2325	1.88e-49	1.89e-45	UP	TRINITY_DN20082_c0_g1	TraesCS7A01G374400.1	1085	1153	1188	3.95e-19	TraesCS7A01G374400	chr7A	547142812	547146424	Protein Ycf2
	TRINITY_DN6755_c1_g2	11.2282	3.34e-27	1.41e-24	UP	TRINITY_DN6755_c1_g2	TraesCS5A01G556500.1	3101	3294	3294	2.3e-96	TraesCS5A01G556500	chr5A	707822260	707827915	Kinesin-like protein
	TRINITY_DN20934_c0_g1	11.2193	2.43e-26	8.93e-24	UP	NA	NA	NA	NA	NA	NA	NA	NA	NA	NA	NA
	TRINITY_DN9374_c1_g1	11.2096	3.35e-21	5.33e-19	UP	TRINITY_DN9374_c1_g1	TraesCS1B01G082300.1	14	101	324	3.41e-32	TraesCS1B01G082300	chr1B	65770974	65772767	Peroxidase
	TRINITY_DN60417_c0_g2	11.1841	1.38e-18	1.5e-16	UP	TRINITY_DN60417_c0_g2	TraesCS7D01G366600.1	3081	2830	4554	3.42e-127	TraesCS7D01G366600	chr7D	474333460	474344369	ABC transporter family protein
	TRINITY_DN5247_c0_g1	11.161	2.06e-26	7.73e-24	UP	NA	NA	NA	NA	NA	NA	NA	NA	NA	NA	NA
	TRINITY_DN32376_c0_g2	11.1474	3.22e-26	1.17e-23	UP	NA	NA	NA	NA	NA	NA	NA	NA	NA	NA	NA
	TRINITY_DN20128_c0_g1	11.1453	1.41e-11	5.38e-10	UP	TRINITY_DN20128_c0_g1	TraesCS7D01G441100.1	1	132	357	6.51e-64	TraesCS7D01G441100	chr7D	560706657	560707432	Protease inhibitor/seed storage/lipid transfer family protein
	TRINITY_DN55274_c0_g1	11.1349	9.67e-25	2.68e-22	UP	TRINITY_DN55274_c0_g1	TraesCS1A01G055400.1	1755	1940	2292	5.45e-63	TraesCS1A01G055400	chr1A	36562050	36569405	DIS3-like exonuclease 2
	TRINITY_DN3681_c2_g2	11.1246	3.11e-07	6.12e-06	UP	TRINITY_DN3681_c2_g2	TraesCS2A01G532400.1	52	273	273	3.67e-62	TraesCS2A01G532400	chr2A	748776021	748776293	Wound-responsive family protein
	TRINITY_DN10628_c1_g1	11.1225	8.84e-26	2.99e-23	UP	TRINITY_DN10628_c1_g1	TraesCS7D01G387800.1	1	85	390	8.59e-38	TraesCS7D01G387800	chr7D	501609644	501610033	Glutamine dumper, putative
	TRINITY_DN12010_c2_g1	11.1174	1.46e-19	1.81e-17	UP	TRINITY_DN12010_c2_g1	TraesCS2B01G073300.1	1012	851	1014	5.02e-53	TraesCS2B01G073300	chr2B	39333285	39334298	MBOAT (Membrane bound O-acyl transferase) family protein
	TRINITY_DN22036_c0_g1	11.117	2.58e-20	3.59e-18	UP	NA	NA	NA	NA	NA	NA	NA	NA	NA	NA	NA
	TRINITY_DN11327_c0_g2	11.1139	1.56e-25	5.04e-23	UP	NA	NA	NA	NA	NA	NA	NA	NA	NA	NA	NA
	TRINITY_DN48181_c0_g1	11.0938	9.54e-13	4.39e-11	UP	TRINITY_DN48181_c0_g1	TraesCS7A01G005400.1	1724	1890	1890	2.56e-58	TraesCS7A01G005400	chr7A	2763192	2765081	Leucine-rich repeat receptor-like protein kinase family protein, putative
	TRINITY_DN11174_c0_g1	11.0897	2.53e-24	6.64e-22	UP	TRINITY_DN11174_c0_g1	TraesCS1B01G473900.1	290	360	360	2.11e-29	TraesCS1B01G473900	chr1B	681847664	681850883	Acetyl-CoA:benzylalcohol acetyltranferase
	TRINITY_DN13479_c3_g1	11.0881	2.39e-22	4.47e-20	UP	TRINITY_DN13479_c3_g1	TraesCS6B01G005000.1	725	529	735	1.01e-66	TraesCS6B01G005000	chr6B	3870164	3871495	Cell surface glycoprotein 1
	TRINITY_DN42817_c0_g1	11.0665	7.89e-26	2.7e-23	UP	TRINITY_DN42817_c0_g1	TraesCS7B01G465100.1	1242	1491	1491	4.11e-129	TraesCS7B01G465100	chr7B	721210284	721212715	DDB1-and CUL4-associated factor
	TRINITY_DN30993_c0_g1	11.0637	4.09e-23	8.8e-21	UP	TRINITY_DN30993_c0_g1	TraesCS7D01G370600.1	1794	1839	1839	4.86e-16	TraesCS7D01G370600	chr7D	479033145	479036104	O-fucosyltransferase-like protein
	TRINITY_DN9295_c0_g1	11.0602	7.84e-26	2.69e-23	UP	TRINITY_DN9295_c0_g1	TraesCS3A01G120300.1	344	173	408	3.26e-14	TraesCS3A01G120300	chr3A	94115651	94116058	Bifunctional inhibitor/lipid-transfer protein/seed storage 2S albumin superfamily protein
	TRINITY_DN39880_c0_g1	11.0583	8.08e-26	2.76e-23	UP	NA	NA	NA	NA	NA	NA	NA	NA	NA	NA	NA
	TRINITY_DN7804_c0_g2	11.053	2.78e-20	3.85e-18	UP	NA	NA	NA	NA	NA	NA	NA	NA	NA	NA	NA
	TRINITY_DN71277_c0_g2	11.0465	2.11e-24	5.64e-22	UP	NA	NA	NA	NA	NA	NA	NA	NA	NA	NA	NA
	TRINITY_DN134508_c2_g1	11.0454	1.44e-23	3.32e-21	UP	TRINITY_DN134508_c2_g1	TraesCS2A01G057600.1	812	923	1011	1.23e-22	TraesCS2A01G057600	chr2A	24180935	24181945	MBOAT (membrane bound O-acyl transferase) family protein
	TRINITY_DN36160_c0_g1	11.0341	1.15e-23	2.68e-21	UP	TRINITY_DN36160_c0_g1	TraesCSU01G037600.1	94	1266	1266	0	TraesCSU01G037600	chrUn	31480913	31483077	Glutamyl-tRNA reductase
	TRINITY_DN49285_c0_g1	11.0306	1.14e-22	2.27e-20	UP	TRINITY_DN49285_c0_g1	TraesCS5B01G215200.1	674	714	714	5.17e-11	TraesCS5B01G215200	chr5B	387952531	387953244	glucan synthase-like 10
	TRINITY_DN1085_c5_g1	11.024	2.17e-25	6.84e-23	UP	NA	NA	NA	NA	NA	NA	NA	NA	NA	NA	NA
	TRINITY_DN10829_c0_g1	11.0093	6.31e-20	8.28e-18	UP	NA	NA	NA	NA	NA	NA	NA	NA	NA	NA	NA
	TRINITY_DN22909_c0_g1	11.0074	2.31e-25	7.24e-23	UP	TRINITY_DN22909_c0_g1	TraesCS2B01G402000.1	65	268	1074	5.8e-104	TraesCS2B01G402000	chr2B	570882791	570884991	Actin-related protein 2/3 complex subunit 2
	TRINITY_DN17560_c0_g1	11.0034	2.39e-25	7.48e-23	UP	NA	NA	NA	NA	NA	NA	NA	NA	NA	NA	NA
	TRINITY_DN13189_c0_g2	10.9931	2.22e-24	5.9e-22	UP	NA	NA	NA	NA	NA	NA	NA	NA	NA	NA	NA
	TRINITY_DN24836_c0_g1	10.9866	4.31e-25	1.28e-22	UP	TRINITY_DN24836_c0_g1	TraesCS2D01G245600.2	2747	2793	2796	4.1e-16	TraesCS2D01G245600	chr2D	282920455	282934954	DNA damage-binding protein
	TRINITY_DN4675_c1_g2	10.986	4.91e-25	1.43e-22	UP	NA	NA	NA	NA	NA	NA	NA	NA	NA	NA	NA
	TRINITY_DN129674_c0_g1	10.9727	1.1e-21	1.86e-19	UP	NA	NA	NA	NA	NA	NA	NA	NA	NA	NA	NA
	TRINITY_DN17718_c0_g1	10.9532	1.7e-24	4.59e-22	UP	TRINITY_DN17718_c0_g1	TraesCS2D01G018800.1	600	1034	1266	9.14e-55	TraesCS2D01G018800	chr2D	8888969	8891101	calcium-dependent lipid-binding family protein
	TRINITY_DN97186_c0_g1	10.9516	1.51e-24	4.11e-22	UP	TRINITY_DN97186_c0_g1	TraesCS4D01G078600.1	241	415	1245	5.67e-55	TraesCS4D01G078600	chr4D	52751244	52754668	Oxidoreductase, aldo/keto reductase family protein, expressed
	TRINITY_DN15812_c0_g1	10.9474	1.44e-16	1.19e-14	UP	TRINITY_DN15812_c0_g1	TraesCSU01G159400.1	14	240	1590	1.39e-62	TraesCSU01G159400	chrUn	225570864	225573454	F-box protein-like protein
	TRINITY_DN9239_c0_g2	10.9448	4.9e-24	1.23e-21	UP	TRINITY_DN9239_c0_g2	TraesCS5D01G427700.1	1	214	336	7.75e-97	TraesCS5D01G427700	chr5D	485814823	485818665	High mobility group protein 1
	TRINITY_DN16363_c0_g1	10.9447	8.47e-25	2.37e-22	UP	TRINITY_DN16363_c0_g1	TraesCS7D01G353400.1	1314	2214	2214	0	TraesCS7D01G353400	chr7D	457128413	457132502	E3 ubiquitin-protein ligase SINA-like 10
	TRINITY_DN81033_c0_g1	10.9444	5.18e-24	1.28e-21	UP	TRINITY_DN81033_c0_g1	TraesCS2A01G042100.1	912	1071	1071	8.78e-61	TraesCS2A01G042100	chr2A	16881213	16888128	Phosphoglycerate mutase-like protein
	TRINITY_DN23392_c0_g1	10.9444	7.3e-25	2.07e-22	UP	NA	NA	NA	NA	NA	NA	NA	NA	NA	NA	NA
	TRINITY_DN20278_c0_g1	10.9325	1.56e-22	3.01e-20	UP	TRINITY_DN20278_c0_g1	TraesCS1B01G022100.1	1	96	1926	9.55e-42	TraesCS1B01G022100	chr1B	10014740	10017493	NBS-LRR disease resistance protein-like protein
	TRINITY_DN41806_c0_g3	10.9304	1.56e-24	4.21e-22	UP	TRINITY_DN41806_c0_g3	TraesCS2D01G554600.1	1123	1340	1440	1.05e-96	TraesCS2D01G554600	chr2D	628937260	628938939	F-box family protein
	TRINITY_DN18723_c0_g1	10.9244	8.78e-19	9.81e-17	UP	NA	NA	NA	NA	NA	NA	NA	NA	NA	NA	NA
	TRINITY_DN22868_c0_g2	10.9187	1.18e-23	2.75e-21	UP	TRINITY_DN22868_c0_g2	TraesCS3D01G007600.1	2733	3322	4071	0	TraesCS3D01G007600	chr3D	2619817	2627172	Paired amphipathic helix protein Sin3
	TRINITY_DN31608_c2_g1	10.9178	1.42e-23	3.26e-21	UP	TRINITY_DN31608_c2_g1	TraesCS5B01G454400.1	7	868	966	0	TraesCS5B01G454400	chr5B	627397370	627400463	HAT transposon superfamily, putative
	TRINITY_DN10_c5_g1	10.9174	2.28e-19	2.75e-17	UP	TRINITY_DN10_c5_g1	TraesCS7B01G479100.1	2104	3779	3897	0	TraesCS7B01G479100	chr7B	733797617	733801596	NBS-LRR disease resistance protein-like protein
	TRINITY_DN44377_c0_g1	10.9158	9.98e-20	1.27e-17	UP	TRINITY_DN44377_c0_g1	TraesCSU01G106100.1	1	158	732	2.63e-78	TraesCSU01G106100	chrUn	93046829	93049602	Endo-1,31,4-beta-D-glucanase
	TRINITY_DN9911_c0_g1	10.9125	5.8e-23	1.22e-20	UP	TRINITY_DN9911_c0_g1	TraesCS2B01G038600.1	943	1089	1089	1.73e-60	TraesCS2B01G038600	chr2B	17872499	17874076	Chalcone synthase
	TRINITY_DN80432_c3_g1	10.912	1.01e-19	1.28e-17	UP	NA	NA	NA	NA	NA	NA	NA	NA	NA	NA	NA
	TRINITY_DN13714_c0_g1	10.8949	3.05e-23	6.67e-21	UP	TRINITY_DN13714_c0_g1	TraesCSU01G039900.1	2501	2722	4290	8.44e-98	TraesCSU01G039900	chrUn	32198491	32207315	Paired amphipathic helix protein Sin3
	TRINITY_DN14949_c1_g1	10.8922	2.07e-24	5.53e-22	UP	NA	NA	NA	NA	NA	NA	NA	NA	NA	NA	NA
	TRINITY_DN21161_c0_g2	10.8895	7.88e-07	1.44e-05	UP	TRINITY_DN21161_c0_g2	TraesCS7D01G397900.1	1158	1248	1248	6.29e-41	TraesCS7D01G397900	chr7D	513311963	513313431	Pectin lyase-like superfamily protein, putative
	TRINITY_DN19734_c0_g1	10.8881	1.7e-23	3.87e-21	UP	TRINITY_DN19734_c0_g1	TraesCS3A01G193700.1	2102	1878	2220	1.37e-115	TraesCS3A01G193700	chr3A	265537026	265546642	Lipase family protein
	TRINITY_DN1085_c2_g1	10.8684	2.32e-23	5.18e-21	UP	NA	NA	NA	NA	NA	NA	NA	NA	NA	NA	NA
	TRINITY_DN13193_c1_g1	10.8673	3.51e-24	8.94e-22	UP	NA	NA	NA	NA	NA	NA	NA	NA	NA	NA	NA
	TRINITY_DN55988_c0_g1	10.8585	1.09e-23	2.57e-21	UP	TRINITY_DN55988_c0_g1	TraesCS7D01G359500.1	765	985	2154	4.87e-110	TraesCS7D01G359500	chr7D	461800616	461804152	Beta-galactosidase
	TRINITY_DN23625_c0_g1	10.8557	2.84e-23	6.24e-21	UP	NA	NA	NA	NA	NA	NA	NA	NA	NA	NA	NA
	TRINITY_DN12181_c0_g2	10.8547	7.84e-22	1.37e-19	UP	TRINITY_DN12181_c0_g2	TraesCS7D01G471300.1	1	130	1893	1.25e-62	TraesCS7D01G471300	chr7D	584853494	584857482	Vacuolar sorting receptor family protein
	TRINITY_DN1660_c2_g1	10.8506	1.5e-19	1.86e-17	UP	NA	NA	NA	NA	NA	NA	NA	NA	NA	NA	NA
	TRINITY_DN14902_c0_g1	10.8461	4.29e-21	6.71e-19	UP	TRINITY_DN14902_c0_g1	TraesCS7D01G346100.1	7	260	1467	1.19e-131	TraesCS7D01G346100	chr7D	445117544	445121851	Alpha/beta hydrolase, putative
	TRINITY_DN16313_c0_g3	10.8442	4.73e-16	3.61e-14	UP	TRINITY_DN16313_c0_g3	TraesCS7B01G259400.1	1	174	330	4.38e-47	TraesCS7B01G259400	chr7B	479784914	479785496	Translation initiation factor IF-2
	TRINITY_DN33232_c0_g1	10.8394	6.47e-23	1.34e-20	UP	TRINITY_DN33232_c0_g1	TraesCS1D01G024400.1	569	805	3978	6.82e-109	TraesCS1D01G024400	chr1D	10257044	10268559	ABC transporter ATP-binding protein
	TRINITY_DN24799_c0_g1	10.8362	4.31e-06	6.64e-05	UP	NA	NA	NA	NA	NA	NA	NA	NA	NA	NA	NA
	TRINITY_DN21912_c0_g1	10.8294	5.96e-22	1.06e-19	UP	TRINITY_DN21912_c0_g1	TraesCS1D01G349600.1	1755	1815	1815	2.36e-24	TraesCS1D01G349600	chr1D	435756105	435760146	Kinesin, putative
	TRINITY_DN21684_c0_g1	10.8289	1.4e-22	2.74e-20	UP	TRINITY_DN21684_c0_g1	TraesCS2D01G504000.1	937	1273	1818	2.53e-174	TraesCS2D01G504000	chr2D	598714248	598720234	Nuclear pore complex protein NUP1
	TRINITY_DN25735_c0_g1	10.8268	2.89e-12	1.23e-10	UP	TRINITY_DN25735_c0_g1	TraesCS7D01G351000.1	1178	1260	1260	1.15e-36	TraesCS7D01G351000	chr7D	451966701	451969342	Acyl-[acyl-carrier-protein] hydrolase
	TRINITY_DN17428_c0_g1	10.8254	7.18e-21	1.09e-18	UP	TRINITY_DN17428_c0_g1	TraesCS6D01G043500.1	1684	1770	1770	1.23e-38	TraesCS6D01G043500	chr6D	18012891	18015968	RNA-binding NOB1
	TRINITY_DN22299_c0_g2	10.8207	3.03e-13	1.5e-11	UP	NA	NA	NA	NA	NA	NA	NA	NA	NA	NA	NA
	TRINITY_DN12094_c0_g3	10.7992	5.62e-21	8.68e-19	UP	NA	NA	NA	NA	NA	NA	NA	NA	NA	NA	NA
	TRINITY_DN191213_c0_g1	10.7985	8.51e-23	1.72e-20	UP	NA	NA	NA	NA	NA	NA	NA	NA	NA	NA	NA
	TRINITY_DN3964_c0_g3	10.7946	7.7e-22	1.35e-19	UP	NA	NA	NA	NA	NA	NA	NA	NA	NA	NA	NA
	TRINITY_DN5577_c0_g2	10.7928	1.42e-22	2.79e-20	UP	TRINITY_DN5577_c0_g2	TraesCS6B01G270600.1	1617	1697	2091	1.85e-25	TraesCS6B01G270600	chr6B	487534568	487541541	N6-adenosine-methyltransferase MT-A70-like protein
	TRINITY_DN45800_c0_g1	10.776	1.2e-21	2.01e-19	UP	NA	NA	NA	NA	NA	NA	NA	NA	NA	NA	NA
	TRINITY_DN15388_c0_g1	10.7757	2.35e-23	5.25e-21	UP	NA	NA	NA	NA	NA	NA	NA	NA	NA	NA	NA
	TRINITY_DN40411_c0_g1	10.7737	2.37e-23	5.27e-21	UP	TRINITY_DN40411_c0_g1	TraesCS7B01G309300.2	1030	1085	1146	6.55e-20	TraesCS7B01G309300	chr7B	553623812	553626351	WAT1-related protein
	TRINITY_DN68567_c0_g1	10.7708	8.66e-22	1.51e-19	UP	NA	NA	NA	NA	NA	NA	NA	NA	NA	NA	NA
	TRINITY_DN23074_c0_g2	10.7654	1.34e-18	1.47e-16	UP	NA	NA	NA	NA	NA	NA	NA	NA	NA	NA	NA
	TRINITY_DN15072_c0_g1	10.7646	6.89e-23	1.41e-20	UP	TRINITY_DN15072_c0_g1	TraesCS2D01G042200.1	1918	3180	3180	0	TraesCS2D01G042200	chr2D	15113231	15116657	Disease resistance protein
	TRINITY_DN35573_c0_g1	10.7598	2.37e-23	5.27e-21	UP	NA	NA	NA	NA	NA	NA	NA	NA	NA	NA	NA
	TRINITY_DN13894_c0_g1	10.7558	2.52e-23	5.55e-21	UP	TRINITY_DN13894_c0_g1	TraesCS2D01G319000.1	514	714	726	1.22e-76	TraesCS2D01G319000	chr2D	409436752	409438044	Replication factor-A-like protein
	TRINITY_DN2552_c1_g2	10.7532	5.32e-23	1.13e-20	UP	TRINITY_DN2552_c1_g2	TraesCS4A01G446600.1	3188	3753	3753	0	TraesCS4A01G446600	chr4A	714099723	714103581	Receptor-like protein kinase
	TRINITY_DN42374_c0_g1	10.7528	9.25e-22	1.59e-19	UP	TRINITY_DN42374_c0_g1	TraesCS6B01G119500.1	941	1044	1044	3.29e-48	TraesCS6B01G119500	chr6B	114157501	114161192	Transmembrane protein, putative
	TRINITY_DN80991_c1_g1	10.7522	3.1e-23	6.74e-21	UP	TRINITY_DN80991_c1_g1	TraesCS2D01G525900.1	268	1	570	3.22e-139	TraesCS2D01G525900	chr2D	614644294	614644951	Early light-induced protein 2, chloroplastic
	TRINITY_DN22762_c0_g2	10.736	1.21e-16	1.01e-14	UP	TRINITY_DN22762_c0_g2	TraesCS5D01G427700.1	126	336	336	1.19e-88	TraesCS5D01G427700	chr5D	485814823	485818665	High mobility group protein 1
	TRINITY_DN71069_c0_g1	10.7185	5.44e-23	1.15e-20	UP	NA	NA	NA	NA	NA	NA	NA	NA	NA	NA	NA
	TRINITY_DN366_c1_g1	10.7168	1.68e-22	3.23e-20	UP	TRINITY_DN366_c1_g1	TraesCS4B01G161800.1	95	213	393	8.08e-36	TraesCS4B01G161800	chr4B	322742498	322752481	Auxin response factor
	TRINITY_DN15429_c0_g2	10.7132	1.66e-22	3.2e-20	UP	NA	NA	NA	NA	NA	NA	NA	NA	NA	NA	NA
	TRINITY_DN32486_c0_g1	10.7098	8.89e-23	1.79e-20	UP	NA	NA	NA	NA	NA	NA	NA	NA	NA	NA	NA
	TRINITY_DN72644_c0_g1	10.7047	6.4e-23	1.33e-20	UP	TRINITY_DN72644_c0_g1	TraesCS7D01G241100.1	142	549	2103	6.56e-134	TraesCS7D01G241100	chr7D	205542410	205546351	Heat shock protein 90
	TRINITY_DN42579_c1_g1	10.6996	1.98e-22	3.75e-20	UP	NA	NA	NA	NA	NA	NA	NA	NA	NA	NA	NA
	TRINITY_DN244590_c0_g1	10.6961	1.05e-22	2.09e-20	UP	NA	NA	NA	NA	NA	NA	NA	NA	NA	NA	NA
	TRINITY_DN5996_c0_g2	10.6893	1.39e-22	2.73e-20	UP	NA	NA	NA	NA	NA	NA	NA	NA	NA	NA	NA
	TRINITY_DN20507_c0_g3	10.6875	1.55e-05	0.000208486	UP	TRINITY_DN20507_c0_g3	TraesCS5B01G124100.1	217	527	1134	7.55e-70	TraesCS5B01G124100	chr5B	223983433	223985799	Actin
	TRINITY_DN13977_c0_g2	10.6834	1.45e-22	2.83e-20	UP	TRINITY_DN13977_c0_g2	TraesCS7D01G477300.1	154	1	429	3.69e-76	TraesCS7D01G477300	chr7D	588432090	588432518	Histone H2B
	TRINITY_DN37406_c0_g1	10.6808	1.15e-19	1.46e-17	UP	TRINITY_DN37406_c0_g1	TraesCS7D01G477600.1	428	710	756	1.01e-147	TraesCS7D01G477600	chr7D	588553773	588558033	Ubiquitin-conjugating enzyme E2
	TRINITY_DN28056_c3_g1	10.6631	3.72e-22	6.77e-20	UP	TRINITY_DN28056_c3_g1	TraesCS5A01G091100.1	8	312	426	6.84e-140	TraesCS5A01G091100	chr5A	125228227	125228652	Retrovirus-related Pol polyprotein from transposon TNT 1-94
	TRINITY_DN54517_c1_g1	10.6591	1.53e-22	2.98e-20	UP	TRINITY_DN54517_c1_g1	TraesCS7B01G484300.1	1702	2027	3303	3.29e-148	TraesCS7B01G484300	chr7B	741572636	741581953	DUF789 family protein
	TRINITY_DN16948_c1_g1	10.6577	4.82e-18	4.86e-16	UP	NA	NA	NA	NA	NA	NA	NA	NA	NA	NA	NA
	TRINITY_DN18_c2_g1	10.6475	7.26e-22	1.28e-19	UP	NA	NA	NA	NA	NA	NA	NA	NA	NA	NA	NA
	TRINITY_DN13924_c0_g3	10.6375	9.08e-22	1.57e-19	UP	TRINITY_DN13924_c0_g3	TraesCS7D01G376800.1	2845	2985	2985	2.23e-68	TraesCS7D01G376800	chr7D	488045376	488051103	Elongation factor like protein
	TRINITY_DN7919_c0_g1	10.635	4.28e-17	3.81e-15	UP	TRINITY_DN7919_c0_g1	TraesCS1B01G473900.1	1	48	360	4.43e-17	TraesCS1B01G473900	chr1B	681847664	681850883	Acetyl-CoA:benzylalcohol acetyltranferase
	TRINITY_DN18242_c0_g1	10.6292	2.38e-15	1.64e-13	UP	TRINITY_DN18242_c0_g1	TraesCS7A01G046400.1	256	574	900	5.7e-101	TraesCS7A01G046400	chr7A	20982479	20983378	Disease resistance protein
	TRINITY_DN19143_c0_g1	10.6256	1.45e-19	1.8e-17	UP	NA	NA	NA	NA	NA	NA	NA	NA	NA	NA	NA
	TRINITY_DN121729_c0_g1	10.6256	6.02e-07	1.12e-05	UP	NA	NA	NA	NA	NA	NA	NA	NA	NA	NA	NA
	TRINITY_DN35460_c1_g1	10.6226	6.62e-19	7.53e-17	UP	TRINITY_DN35460_c1_g1	TraesCS7D01G008500.1	342	514	1011	7.89e-68	TraesCS7D01G008500	chr7D	4024888	4029256	NAC domain protein,
	TRINITY_DN9943_c0_g2	10.6217	7.68e-17	6.63e-15	UP	TRINITY_DN9943_c0_g2	TraesCS6A01G074700.1	643	856	882	1.69e-109	TraesCS6A01G074700	chr6A	43274512	43276548	Lon protease
	TRINITY_DN30764_c0_g1	10.6161	1.14e-21	1.92e-19	UP	TRINITY_DN30764_c0_g1	TraesCS4A01G444900.1	1797	2093	2751	8.75e-119	TraesCS4A01G444900	chr4A	713032337	713035659	NBS-LRR disease resistance protein, putative, expressed
	TRINITY_DN45598_c0_g2	10.6126	5.49e-16	4.15e-14	UP	NA	NA	NA	NA	NA	NA	NA	NA	NA	NA	NA
	TRINITY_DN174280_c0_g1	10.6086	5.88e-22	1.05e-19	UP	TRINITY_DN174280_c0_g1	TraesCS6D01G382000.1	1	993	993	0	TraesCS6D01G382000	chr6D	462075974	462077661	5'-3' exonuclease family protein
	TRINITY_DN19072_c0_g1	10.6075	2.71e-20	3.75e-18	UP	TRINITY_DN19072_c0_g1	TraesCS6A01G397500.1	589	971	1596	0	TraesCS6A01G397500	chr6A	608967640	608969349	F-box/RNI-like/FBD-like domains-containing protein
	TRINITY_DN17716_c0_g1	10.6031	2.18e-13	1.11e-11	UP	TRINITY_DN17716_c0_g1	TraesCS6B01G362200.1	237	447	930	3.6e-106	TraesCS6B01G362200	chr6B	633896583	633898132	Superoxide dismutase [Cu-Zn]
	TRINITY_DN31823_c0_g3	10.602	1.47e-21	2.44e-19	UP	NA	NA	NA	NA	NA	NA	NA	NA	NA	NA	NA
	TRINITY_DN17420_c1_g2	10.6013	5.21e-20	6.94e-18	UP	NA	NA	NA	NA	NA	NA	NA	NA	NA	NA	NA
	TRINITY_DN4995_c0_g2	10.5968	2.6e-21	4.19e-19	UP	NA	NA	NA	NA	NA	NA	NA	NA	NA	NA	NA
	TRINITY_DN6332_c1_g3	10.5922	4.1e-12	1.71e-10	UP	TRINITY_DN6332_c1_g3	TraesCS2A01G531800.1	253	1	267	1.57e-87	TraesCS2A01G531800	chr2A	748558310	748558576	Wound-responsive family protein
	TRINITY_DN75752_c0_g3	10.5758	8.04e-21	1.21e-18	UP	NA	NA	NA	NA	NA	NA	NA	NA	NA	NA	NA
	TRINITY_DN22327_c0_g1	10.5653	9.09e-22	1.57e-19	UP	NA	NA	NA	NA	NA	NA	NA	NA	NA	NA	NA
	TRINITY_DN26614_c0_g1	10.5598	2.37e-21	3.84e-19	UP	NA	NA	NA	NA	NA	NA	NA	NA	NA	NA	NA
	TRINITY_DN100249_c0_g2	10.5576	5.8e-21	8.92e-19	UP	TRINITY_DN100249_c0_g2	TraesCS4A01G211600.1	807	960	1989	3.79e-54	TraesCS4A01G211600	chr4A	505790616	505794673	Kinase
	TRINITY_DN179147_c0_g1	10.5533	4.78e-17	4.22e-15	UP	NA	NA	NA	NA	NA	NA	NA	NA	NA	NA	NA
	TRINITY_DN40140_c0_g1	10.5525	1.93e-21	3.16e-19	UP	NA	NA	NA	NA	NA	NA	NA	NA	NA	NA	NA
	TRINITY_DN39705_c0_g1	10.5501	3.52e-14	2.01e-12	UP	TRINITY_DN39705_c0_g1	TraesCS7D01G417400.1	1	215	1038	1.13e-106	TraesCS7D01G417400	chr7D	535967080	535968479	Peroxidase
	TRINITY_DN26523_c2_g1	10.5301	1.75e-21	2.87e-19	UP	TRINITY_DN26523_c2_g1	TraesCS5A01G003200.2	610	831	1278	6.29e-114	TraesCS5A01G003200	chr5A	2409293	2412483	Core-2/I-branching beta-1,6-N-acetylglucosaminyltransferase family protein
	TRINITY_DN36271_c0_g1	10.5299	2.39e-19	2.87e-17	UP	TRINITY_DN36271_c0_g1	TraesCS4D01G051700.1	12	350	369	4.7e-34	TraesCS4D01G051700	chr4D	27544037	27545350	Ubiquitin-like-specific protease 1A
	TRINITY_DN11419_c0_g4	10.5221	2.91e-19	3.45e-17	UP	TRINITY_DN11419_c0_g4	TraesCS4A01G346000.1	369	411	492	6.53e-09	TraesCS4A01G346000	chr4A	625128444	625129887	Proline synthase co-transcribed bacterial
	TRINITY_DN5652_c1_g1	10.5183	3.05e-21	4.89e-19	UP	NA	NA	NA	NA	NA	NA	NA	NA	NA	NA	NA
	TRINITY_DN43988_c1_g1	10.5179	2.77e-14	1.61e-12	UP	NA	NA	NA	NA	NA	NA	NA	NA	NA	NA	NA
	TRINITY_DN5087_c2_g1	10.5116	1.88e-20	2.69e-18	UP	TRINITY_DN5087_c2_g1	TraesCS7A01G008800.1	1	411	1011	1.34e-125	TraesCS7A01G008800	chr7A	3858938	3860198	NAC domain protein,
	TRINITY_DN42407_c0_g1	10.5082	2.7e-21	4.35e-19	UP	NA	NA	NA	NA	NA	NA	NA	NA	NA	NA	NA
	TRINITY_DN32531_c0_g1	10.5036	2.41e-20	3.36e-18	UP	TRINITY_DN32531_c0_g1	TraesCS7D01G500700.1	1820	2072	2118	4.26e-131	TraesCS7D01G500700	chr7D	606824085	606826202	Receptor-like kinase
	TRINITY_DN33439_c0_g1	10.4992	3.19e-19	3.78e-17	UP	TRINITY_DN33439_c0_g1	TraesCS3D01G524900.1	109	268	480	5.51e-71	TraesCS3D01G524900	chr3D	604530197	604534179	Non-lysosomal glucosylceramidase
	TRINITY_DN3158_c0_g2	10.4866	8.29e-21	1.25e-18	UP	TRINITY_DN3158_c0_g2	TraesCS7D01G543800.2	279	1	984	6.09e-142	TraesCS7D01G543800	chr7D	632006995	632008533	Chloroplast protein
	TRINITY_DN177542_c0_g1	10.4855	1e-19	1.27e-17	UP	NA	NA	NA	NA	NA	NA	NA	NA	NA	NA	NA
	TRINITY_DN39564_c0_g1	10.4771	2.3e-12	1e-10	UP	TRINITY_DN39564_c0_g1	TraesCS5D01G335400.1	165	246	246	3.28e-32	TraesCS5D01G335400	chr5D	424602064	424602798	Ribonucleoside-diphosphate reductase
	TRINITY_DN34568_c0_g1	10.4765	3.36e-20	4.58e-18	UP	TRINITY_DN34568_c0_g1	TraesCS1B01G352100.1	1493	1557	1815	8.38e-20	TraesCS1B01G352100	chr1B	582929269	582933823	DUF616 family protein
	TRINITY_DN24300_c0_g1	10.47	4.18e-20	5.62e-18	UP	NA	NA	NA	NA	NA	NA	NA	NA	NA	NA	NA
	TRINITY_DN8270_c4_g2	10.4678	2.63e-20	3.66e-18	UP	NA	NA	NA	NA	NA	NA	NA	NA	NA	NA	NA
	TRINITY_DN18008_c3_g1	10.4668	7.18e-21	1.09e-18	UP	TRINITY_DN18008_c3_g1	TraesCS5B01G422400.1	2919	3137	5631	6.75e-89	TraesCS5B01G422400	chr5B	597289088	597305326	NBS-LRR-like resistance protein
	TRINITY_DN26678_c0_g1	10.4612	1.66e-20	2.41e-18	UP	NA	NA	NA	NA	NA	NA	NA	NA	NA	NA	NA
	TRINITY_DN112724_c1_g1	10.4539	7.14e-21	1.09e-18	UP	NA	NA	NA	NA	NA	NA	NA	NA	NA	NA	NA
	TRINITY_DN15832_c0_g1	10.4407	9.47e-17	8.04e-15	UP	TRINITY_DN15832_c0_g1	TraesCS5B01G422400.1	4786	5325	5631	7.17e-172	TraesCS5B01G422400	chr5B	597289088	597305326	NBS-LRR-like resistance protein
	TRINITY_DN17971_c2_g1	10.4393	1.02e-15	7.49e-14	UP	NA	NA	NA	NA	NA	NA	NA	NA	NA	NA	NA
	TRINITY_DN38264_c0_g1	10.4324	2.1e-19	2.54e-17	UP	NA	NA	NA	NA	NA	NA	NA	NA	NA	NA	NA
	TRINITY_DN66620_c0_g1	10.4301	1.02e-20	1.52e-18	UP	NA	NA	NA	NA	NA	NA	NA	NA	NA	NA	NA
	TRINITY_DN48284_c0_g1	10.4237	1.15e-20	1.71e-18	UP	TRINITY_DN48284_c0_g1	TraesCS2A01G333300.1	163	206	1095	1.27e-08	TraesCS2A01G333300	chr2A	566454172	566459706	F-box/RNI-like superfamily protein
	TRINITY_DN11415_c1_g1	10.421	2.87e-20	3.96e-18	UP	TRINITY_DN11415_c1_g1	TraesCS7D01G544000.1	2476	2698	2754	1.66e-90	TraesCS7D01G544000	chr7D	632020979	632024254	NBS-LRR-like resistance protein
	TRINITY_DN187004_c0_g1	10.4197	3.41e-20	4.64e-18	UP	TRINITY_DN187004_c0_g1	TraesCS5D01G087400.1	323	193	444	2.91e-30	TraesCS5D01G087400	chr5D	92464098	92464541	MLO protein homolog 1
	TRINITY_DN13365_c1_g3	10.4195	5.05e-20	6.74e-18	UP	TRINITY_DN13365_c1_g3	TraesCS7A01G045100.1	2518	2751	2751	2.57e-78	TraesCS7A01G045100	chr7A	20650830	20653580	NBS-LRR disease resistance protein, putative, expressed
	TRINITY_DN27225_c0_g1	10.4169	9.68e-09	2.41e-07	UP	TRINITY_DN27225_c0_g1	TraesCS7D01G409400.1	158	424	1149	7.46e-139	TraesCS7D01G409400	chr7D	528078754	528080633	Kinase family protein
	TRINITY_DN25686_c0_g1	10.4169	1.62e-20	2.36e-18	UP	TRINITY_DN25686_c0_g1	TraesCS4D01G101800.1	407	706	1269	2.82e-99	TraesCS4D01G101800	chr4D	80141040	80145084	protein kinase family protein
	TRINITY_DN10046_c1_g1	10.4159	1.23e-16	1.03e-14	UP	TRINITY_DN10046_c1_g1	TraesCS7D01G552200.1	382	507	507	2.58e-60	TraesCS7D01G552200	chr7D	635390045	635390551	4-hydroxy-4-methyl-2-oxoglutarate aldolase
	TRINITY_DN30362_c0_g1	10.4158	1.68e-18	1.81e-16	UP	TRINITY_DN30362_c0_g1	TraesCS5B01G422400.1	4033	4425	5631	1.9e-128	TraesCS5B01G422400	chr5B	597289088	597305326	NBS-LRR-like resistance protein
	TRINITY_DN4200_c0_g2	10.4123	2.79e-17	2.55e-15	UP	TRINITY_DN4200_c0_g2	TraesCS7D01G413500.1	588	483	588	2.39e-49	TraesCS7D01G413500	chr7D	531827089	531828040	6,7-dimethyl-8-ribityllumazine synthase
	TRINITY_DN77435_c1_g1	10.41	3.49e-16	2.72e-14	UP	TRINITY_DN77435_c1_g1	TraesCS6B01G011800.1	1312	1024	1782	4.9e-136	TraesCS6B01G011800	chr6B	6849093	6853009	60 kDa chaperonin
	TRINITY_DN55943_c0_g1	10.4071	2.32e-20	3.26e-18	UP	TRINITY_DN55943_c0_g1	TraesCS7B01G382300.1	819	1052	3006	6.77e-104	TraesCS7B01G382300	chr7B	648104008	648109818	Copper-transporting ATPase
	TRINITY_DN17405_c0_g1	10.4057	2.61e-17	2.4e-15	UP	NA	NA	NA	NA	NA	NA	NA	NA	NA	NA	NA
	TRINITY_DN16667_c0_g1	10.4052	8.21e-20	1.06e-17	UP	TRINITY_DN16667_c0_g1	TraesCS2D01G473500.1	3959	4418	4695	0	TraesCS2D01G473500	chr2D	577126147	577130841	NBS-LRR disease resistance protein-like protein
	TRINITY_DN18965_c0_g4	10.4002	1.77e-20	2.55e-18	UP	TRINITY_DN18965_c0_g4	TraesCS2B01G051700.1	1258	1485	1485	5.4e-79	TraesCS2B01G051700	chr2B	25257102	25259849	RING/U-box superfamily protein
	TRINITY_DN25070_c1_g1	10.3996	1.62e-13	8.37e-12	UP	TRINITY_DN25070_c1_g1	TraesCS3A01G017100.1	1662	1961	2052	4.08e-112	TraesCS3A01G017100	chr3A	10951562	10954096	Receptor-like kinase
	TRINITY_DN9751_c0_g1	10.3983	2.33e-17	2.16e-15	UP	TRINITY_DN9751_c0_g1	TraesCS6B01G031500.1	1300	1778	2031	0	TraesCS6B01G031500	chr6B	18645695	18648598	Acid beta-fructofuranosidase
	TRINITY_DN49344_c0_g1	10.3978	2.47e-18	2.62e-16	UP	NA	NA	NA	NA	NA	NA	NA	NA	NA	NA	NA
	TRINITY_DN50105_c0_g2	10.3914	2.1e-20	2.98e-18	UP	NA	NA	NA	NA	NA	NA	NA	NA	NA	NA	NA
	TRINITY_DN53497_c1_g1	10.3898	2.11e-20	2.98e-18	UP	TRINITY_DN53497_c1_g1	TraesCS7B01G480300.1	5369	5454	5889	2e-31	TraesCS7B01G480300	chr7B	734259844	734274042	Callose synthase
	TRINITY_DN30444_c0_g1	10.3889	2.64e-20	3.66e-18	UP	TRINITY_DN30444_c0_g1	TraesCS7D01G425000.1	1011	1200	1200	5.51e-96	TraesCS7D01G425000	chr7D	545391506	545399015	TOPLESS-related 2
	TRINITY_DN48693_c0_g1	10.3843	9.95e-18	9.69e-16	UP	TRINITY_DN48693_c0_g1	TraesCS7D01G475100.1	521	307	744	9.73e-110	TraesCS7D01G475100	chr7D	587119217	587120736	Basic-leucine zipper (BZIP) transcription factor family
	TRINITY_DN40881_c0_g1	10.3823	9.73e-13	4.47e-11	UP	NA	NA	NA	NA	NA	NA	NA	NA	NA	NA	NA
	TRINITY_DN36730_c0_g1	10.3799	2.85e-20	3.94e-18	UP	NA	NA	NA	NA	NA	NA	NA	NA	NA	NA	NA
	TRINITY_DN9820_c2_g2	10.3798	5.31e-16	4.02e-14	UP	NA	NA	NA	NA	NA	NA	NA	NA	NA	NA	NA
	TRINITY_DN70641_c0_g1	10.3794	2.48e-20	3.46e-18	UP	NA	NA	NA	NA	NA	NA	NA	NA	NA	NA	NA
	TRINITY_DN26014_c0_g1	10.3793	2.13e-19	2.58e-17	UP	NA	NA	NA	NA	NA	NA	NA	NA	NA	NA	NA
	TRINITY_DN59956_c0_g1	10.3788	9.71e-20	1.24e-17	UP	NA	NA	NA	NA	NA	NA	NA	NA	NA	NA	NA
	TRINITY_DN11415_c0_g1	10.3776	3.69e-20	5e-18	UP	TRINITY_DN11415_c0_g1	TraesCS7A01G567500.1	3881	4072	5253	4.83e-77	TraesCS7A01G567500	chr7A	736088791	736096134	NBS-LRR disease resistance protein
	TRINITY_DN15095_c1_g1	10.3764	5.76e-19	6.6e-17	UP	TRINITY_DN15095_c1_g1	TraesCS2A01G010200.1	1	142	1233	1.76e-57	TraesCS2A01G010200	chr2A	3964870	3967583	StAR-related lipid transfer protein
	TRINITY_DN13346_c0_g1	10.3714	3.9e-20	5.27e-18	UP	TRINITY_DN13346_c0_g1	TraesCS5A01G003200.1	1015	1272	1272	2.72e-130	TraesCS5A01G003200	chr5A	2409293	2412483	Core-2/I-branching beta-1,6-N-acetylglucosaminyltransferase family protein
	TRINITY_DN74231_c1_g1	10.371	3.13e-20	4.29e-18	UP	TRINITY_DN74231_c1_g1	TraesCS2A01G570700.1	1	29	1017	1.15e-06	TraesCS2A01G570700	chr2A	768086094	768087446	ATP synthase subunit alpha, chloroplastic
	TRINITY_DN8823_c0_g1	10.3702	1.31e-18	1.44e-16	UP	TRINITY_DN8823_c0_g1	TraesCS1A01G030900.2	610	1916	2079	0	TraesCS1A01G030900	chr1A	14253496	14256373	Receptor-like protein kinase
	TRINITY_DN26582_c0_g2	10.3697	2.86e-19	3.41e-17	UP	TRINITY_DN26582_c0_g2	TraesCSU01G007900.1	1221	2775	2775	0	TraesCSU01G007900	chrUn	11750437	11754524	NBS-LRR disease resistance protein, putative, expressed
	TRINITY_DN39169_c0_g1	10.3681	3.04e-20	4.17e-18	UP	TRINITY_DN39169_c0_g1	TraesCS7D01G400100.1	1	74	573	1.15e-31	TraesCS7D01G400100	chr7D	517114805	517115640	YGL010w-like protein
	TRINITY_DN20278_c0_g2	10.3602	7.8e-20	1.01e-17	UP	NA	NA	NA	NA	NA	NA	NA	NA	NA	NA	NA
	TRINITY_DN25846_c0_g1	10.3569	2.48e-18	2.62e-16	UP	TRINITY_DN25846_c0_g1	TraesCS5A01G015400.1	417	491	1302	1.48e-21	TraesCS5A01G015400	chr5A	11022087	11025504	F-box protein
	TRINITY_DN2374_c3_g1	10.3534	1.98e-15	1.39e-13	UP	TRINITY_DN2374_c3_g1	TraesCS5D01G531400.1	360	478	1179	3.01e-36	TraesCS5D01G531400	chr5D	546921829	546924649	GDSL esterase/lipase
	TRINITY_DN28119_c0_g1	10.3523	3.48e-14	1.99e-12	UP	NA	NA	NA	NA	NA	NA	NA	NA	NA	NA	NA
	TRINITY_DN7594_c0_g2	10.3491	4.36e-19	5.09e-17	UP	NA	NA	NA	NA	NA	NA	NA	NA	NA	NA	NA
	TRINITY_DN3010_c0_g1	10.3465	1.7e-17	1.6e-15	UP	TRINITY_DN3010_c0_g1	TraesCS4A01G463300.1	2262	2358	2358	1.09e-40	TraesCS4A01G463300	chr4A	727114259	727119033	ATP-dependent zinc metalloprotease FtsH
	TRINITY_DN1371_c2_g1	10.3459	4.42e-19	5.14e-17	UP	NA	NA	NA	NA	NA	NA	NA	NA	NA	NA	NA
	TRINITY_DN32082_c0_g2	10.3391	4.89e-20	6.54e-18	UP	TRINITY_DN32082_c0_g2	TraesCS4A01G023300.1	303	415	705	4.28e-48	TraesCS4A01G023300	chr4A	16501475	16502784	Annexin
	TRINITY_DN13320_c3_g1	10.3388	1.29e-19	1.61e-17	UP	TRINITY_DN13320_c3_g1	TraesCS2D01G004900.1	3855	3919	3921	4.24e-18	TraesCS2D01G004900	chr2D	2676714	2688712	NBS-LRR disease resistance protein-like protein
	TRINITY_DN19838_c0_g4	10.3351	3.46e-14	1.98e-12	UP	TRINITY_DN19838_c0_g4	TraesCS2B01G051600.1	503	572	1548	5.61e-26	TraesCS2B01G051600	chr2B	25246679	25251560	Beta-glucosidase
	TRINITY_DN14323_c0_g2	10.3303	1.4e-15	1.01e-13	UP	TRINITY_DN14323_c0_g2	TraesCS7A01G381800.1	1608	1665	1665	1.53e-22	TraesCS7A01G381800	chr7A	556479193	556481132	Peptide transporter
	TRINITY_DN3805_c0_g3	10.3299	6.06e-20	7.98e-18	UP	TRINITY_DN3805_c0_g3	TraesCS3A01G505200.1	1	92	345	4.6e-31	TraesCS3A01G505200	chr3A	727072199	727074042	Mitochondrial import inner membrane translocase subunit TIM16
	TRINITY_DN2979_c2_g1	10.3285	2.29e-19	2.76e-17	UP	NA	NA	NA	NA	NA	NA	NA	NA	NA	NA	NA
	TRINITY_DN42297_c1_g1	10.3261	3.73e-19	4.39e-17	UP	TRINITY_DN42297_c1_g1	TraesCS7D01G109700.1	206	480	810	8.55e-108	TraesCS7D01G109700	chr7D	66374194	66375948	Actin cross-linking protein, putative (DUF569)
	TRINITY_DN19858_c0_g1	10.3237	6.74e-19	7.65e-17	UP	TRINITY_DN19858_c0_g1	TraesCS7A01G008600.1	1287	1444	2205	2.1e-41	TraesCS7A01G008600	chr7A	3845602	3850842	3-methyl-2-oxobutanoate hydroxymethyltransferase
	TRINITY_DN1208_c0_g3	10.3198	3.18e-12	1.34e-10	UP	NA	NA	NA	NA	NA	NA	NA	NA	NA	NA	NA
	TRINITY_DN12757_c0_g2	10.3178	2.74e-16	2.17e-14	UP	TRINITY_DN12757_c0_g2	TraesCS2A01G046100.1	1054	1216	2625	1.24e-19	TraesCS2A01G046100	chr2A	18016470	18025549	Cyclopropane-fatty-acyl-phospholipid synthase
	TRINITY_DN82288_c0_g1	10.3107	1.55e-19	1.92e-17	UP	TRINITY_DN82288_c0_g1	TraesCS5D01G138700.1	155	288	303	3.25e-36	TraesCS5D01G138700	chr5D	220754227	220755842	disease resistance protein (TIR-NBS-LRR class) family
	TRINITY_DN66168_c1_g1	10.3029	1.51e-19	1.87e-17	UP	TRINITY_DN66168_c1_g1	TraesCS2D01G523100.1	2397	2599	3648	9.64e-102	TraesCS2D01G523100	chr2D	611892623	611898627	ABC transporter ATP-binding protein
	TRINITY_DN15035_c0_g2	10.3008	2.57e-18	2.71e-16	UP	NA	NA	NA	NA	NA	NA	NA	NA	NA	NA	NA
	TRINITY_DN29785_c3_g1	10.2978	9.29e-29	5.02e-26	UP	TRINITY_DN29785_c3_g1	TraesCS5B01G182900.6	3901	3950	3951	1.66e-11	TraesCS5B01G182900	chr5B	332950032	332967912	Disease resistance protein (NBS-LRR class) family
	TRINITY_DN13646_c1_g1	10.2953	1.91e-18	2.04e-16	UP	NA	NA	NA	NA	NA	NA	NA	NA	NA	NA	NA
	TRINITY_DN49920_c0_g2	10.2835	1.59e-17	1.5e-15	UP	TRINITY_DN49920_c0_g2	TraesCS2B01G609600.1	810	1109	1149	1.83e-135	TraesCS2B01G609600	chr2B	789608779	789611255	Glutathione S-transferase
	TRINITY_DN21460_c0_g1	10.2802	1.33e-18	1.45e-16	UP	TRINITY_DN21460_c0_g1	TraesCS2A01G038300.1	1	181	783	3.85e-68	TraesCS2A01G038300	chr2A	16065663	16075869	Beta-glucosidase
	TRINITY_DN35002_c0_g1	10.2774	6.64e-07	1.23e-05	UP	TRINITY_DN35002_c0_g1	TraesCS2B01G573700.1	209	445	1056	3.1e-122	TraesCS2B01G573700	chr2B	763473911	763475309	Cysteine protease
	TRINITY_DN30593_c0_g1	10.2758	2.36e-15	1.63e-13	UP	NA	NA	NA	NA	NA	NA	NA	NA	NA	NA	NA
	TRINITY_DN53994_c0_g1	10.2725	2.63e-19	3.14e-17	UP	TRINITY_DN53994_c0_g1	TraesCS7D01G523000.1	383	649	2382	7.46e-139	TraesCS7D01G523000	chr7D	619510842	619517305	ARM repeat superfamily protein
	TRINITY_DN31409_c0_g1	10.2707	1.87e-19	2.29e-17	UP	NA	NA	NA	NA	NA	NA	NA	NA	NA	NA	NA
	TRINITY_DN10509_c1_g2	10.2695	1.41e-18	1.53e-16	UP	TRINITY_DN10509_c1_g2	TraesCS6A01G078200.1	162	222	882	1.23e-20	TraesCS6A01G078200	chr6A	48103575	48106963	Protein kinase
	TRINITY_DN217692_c0_g1	10.2672	2.92e-18	3.06e-16	UP	TRINITY_DN217692_c0_g1	TraesCS2D01G468100.1	1	1380	1380	0	TraesCS2D01G468100	chr2D	572929280	572930659	basic helix-loop-helix (bHLH) DNA-binding superfamily protein
	TRINITY_DN11570_c0_g1	10.2669	2.41e-19	2.89e-17	UP	NA	NA	NA	NA	NA	NA	NA	NA	NA	NA	NA
	TRINITY_DN28550_c0_g3	10.264	2.81e-18	2.96e-16	UP	TRINITY_DN28550_c0_g3	TraesCS7D01G510400.1	2290	2066	2505	1.37e-115	TraesCS7D01G510400	chr7D	613447359	613453491	Transcriptional corepressor SEUSS
	TRINITY_DN39851_c0_g1	10.2625	2.04e-19	2.48e-17	UP	TRINITY_DN39851_c0_g1	TraesCS1B01G386200.1	394	462	462	4.69e-27	TraesCS1B01G386200	chr1B	620129367	620129828	Histone H2B
	TRINITY_DN1802_c0_g1	10.2546	6.4e-31	4.61e-28	UP	TRINITY_DN1802_c0_g1	TraesCS2D01G468200.1	594	1450	1734	0	TraesCS2D01G468200	chr2D	572952347	572954307	Polyphenol oxidase
	TRINITY_DN18463_c2_g1	10.2526	5.79e-18	5.79e-16	UP	NA	NA	NA	NA	NA	NA	NA	NA	NA	NA	NA
	TRINITY_DN23489_c0_g1	10.243	6.35e-15	4.07e-13	UP	TRINITY_DN23489_c0_g1	TraesCS6A01G046900.1	472	687	1116	1.34e-100	TraesCS6A01G046900	chr6A	23874305	23877775	Low PSII Accumulation 3
	TRINITY_DN27855_c1_g2	10.243	3.3e-19	3.9e-17	UP	NA	NA	NA	NA	NA	NA	NA	NA	NA	NA	NA
	TRINITY_DN26964_c0_g1	10.2306	1.31e-14	8e-13	UP	NA	NA	NA	NA	NA	NA	NA	NA	NA	NA	NA
	TRINITY_DN15237_c0_g1	10.2251	4.09e-19	4.8e-17	UP	TRINITY_DN15237_c0_g1	TraesCS7D01G336800.1	231	1380	1380	0	TraesCS7D01G336800	chr7D	429572605	429576773	NOP56-like pre RNA processing ribonucleoprotein
	TRINITY_DN17312_c0_g2	10.2205	3.99e-13	1.94e-11	UP	NA	NA	NA	NA	NA	NA	NA	NA	NA	NA	NA
	TRINITY_DN51313_c0_g1	10.2158	2.79e-15	1.89e-13	UP	NA	NA	NA	NA	NA	NA	NA	NA	NA	NA	NA
	TRINITY_DN172528_c0_g1	10.2096	6.68e-10	1.98e-08	UP	NA	NA	NA	NA	NA	NA	NA	NA	NA	NA	NA
	TRINITY_DN66321_c0_g1	10.207	3.42e-18	3.55e-16	UP	TRINITY_DN66321_c0_g1	TraesCS2B01G533900.1	1429	1137	1893	2.97e-143	TraesCS2B01G533900	chr2B	730187679	730191682	Sec14p-like phosphatidylinositol transfer family protein
	TRINITY_DN9805_c0_g1	10.1965	6.01e-19	6.86e-17	UP	TRINITY_DN9805_c0_g1	TraesCS5A01G542000.1	724	1377	1377	0	TraesCS5A01G542000	chr5A	698347042	698349183	Aspartic proteinase Asp1
	TRINITY_DN15457_c0_g3	10.1946	8.15e-19	9.15e-17	UP	TRINITY_DN15457_c0_g3	TraesCS6B01G203800.1	648	357	687	7.2e-146	TraesCS6B01G203800	chr6B	250792875	250793561	N-alpha-acetyltransferase
	TRINITY_DN3597_c0_g2	10.1935	8.51e-17	7.29e-15	UP	TRINITY_DN3597_c0_g2	TraesCS1D01G004100.1	587	703	2247	2.68e-48	TraesCS1D01G004100	chr1D	2087547	2095019	Tripartite motif-containing protein 29
	TRINITY_DN20070_c0_g1	10.1909	4.39e-17	3.89e-15	UP	NA	NA	NA	NA	NA	NA	NA	NA	NA	NA	NA
	TRINITY_DN30360_c0_g1	10.1863	6.66e-19	7.57e-17	UP	NA	NA	NA	NA	NA	NA	NA	NA	NA	NA	NA
	TRINITY_DN30057_c0_g1	10.185	4.06e-14	2.29e-12	UP	TRINITY_DN30057_c0_g1	TraesCS6D01G046900.2	201	576	576	0	TraesCS6D01G046900	chr6D	21352165	21356137	Chaperone protein htpG family protein
	TRINITY_DN40323_c0_g2	10.1834	2.31e-06	3.81e-05	UP	NA	NA	NA	NA	NA	NA	NA	NA	NA	NA	NA
	TRINITY_DN25608_c0_g4	10.1798	2.29e-13	1.16e-11	UP	NA	NA	NA	NA	NA	NA	NA	NA	NA	NA	NA
	TRINITY_DN20694_c0_g1	10.1785	8.21e-19	9.2e-17	UP	NA	NA	NA	NA	NA	NA	NA	NA	NA	NA	NA
	TRINITY_DN32082_c0_g1	10.1729	4.21e-18	4.3e-16	UP	TRINITY_DN32082_c0_g1	TraesCS4D01G278700.2	432	721	948	9.34e-108	TraesCS4D01G278700	chr4D	450151405	450152973	Annexin
	TRINITY_DN40193_c0_g1	10.1703	9.72e-19	1.08e-16	UP	TRINITY_DN40193_c0_g1	TraesCS1D01G416700.1	102	152	822	1.46e-15	TraesCS1D01G416700	chr1D	475430867	475433576	Isopentenyl-diphosphate delta-isomerase
	TRINITY_DN4675_c1_g1	10.17	6.38e-18	6.35e-16	UP	TRINITY_DN4675_c1_g1	TraesCS1A01G240400.1	1009	1054	1869	2.15e-12	TraesCS1A01G240400	chr1A	427520932	427527764	1,4-alpha-glucan branching enzyme GlgB 1
	TRINITY_DN21830_c0_g1	10.1619	2.31e-14	1.36e-12	UP	TRINITY_DN21830_c0_g1	TraesCS2D01G473500.1	2535	2796	4695	4.39e-136	TraesCS2D01G473500	chr2D	577126147	577130841	NBS-LRR disease resistance protein-like protein
	TRINITY_DN4057_c0_g2	10.1618	1.88e-18	2.01e-16	UP	TRINITY_DN4057_c0_g2	TraesCS7D01G066800.1	210	317	468	1.98e-36	TraesCS7D01G066800	chr7D	37662926	37664524	30S ribosomal protein S10
	TRINITY_DN41778_c0_g1	10.1612	6.14e-18	6.12e-16	UP	NA	NA	NA	NA	NA	NA	NA	NA	NA	NA	NA
	TRINITY_DN1085_c2_g2	10.1569	1.03e-18	1.13e-16	UP	NA	NA	NA	NA	NA	NA	NA	NA	NA	NA	NA
	TRINITY_DN76030_c0_g2	10.1559	4.36e-14	2.45e-12	UP	NA	NA	NA	NA	NA	NA	NA	NA	NA	NA	NA
	TRINITY_DN6895_c0_g4	10.1547	1.44e-18	1.56e-16	UP	NA	NA	NA	NA	NA	NA	NA	NA	NA	NA	NA
	TRINITY_DN27415_c0_g1	10.1531	2.59e-06	4.22e-05	UP	NA	NA	NA	NA	NA	NA	NA	NA	NA	NA	NA
	TRINITY_DN26800_c0_g1	10.1515	2.82e-16	2.23e-14	UP	NA	NA	NA	NA	NA	NA	NA	NA	NA	NA	NA
	TRINITY_DN27061_c0_g2	10.1495	1.66e-18	1.79e-16	UP	TRINITY_DN27061_c0_g2	TraesCS6A01G353700.1	138	345	1635	8.45e-39	TraesCS6A01G353700	chr6A	585427107	585429095	Pheophorbide a oxygenase, chloroplastic
	TRINITY_DN41890_c0_g1	10.1455	1.17e-17	1.13e-15	UP	NA	NA	NA	NA	NA	NA	NA	NA	NA	NA	NA
	TRINITY_DN94752_c0_g2	10.1434	2.19e-18	2.32e-16	UP	TRINITY_DN94752_c0_g2	TraesCS1A01G034900.1	977	1240	1494	1.59e-135	TraesCS1A01G034900	chr1A	18084403	18086010	Cytochrome P450, putative
	TRINITY_DN34447_c3_g1	10.1403	3.68e-17	3.31e-15	UP	TRINITY_DN34447_c3_g1	TraesCS2A01G038100.1	1230	994	1773	8.77e-108	TraesCS2A01G038100	chr2A	16016169	16017941	L-gulonolactone oxidase
	TRINITY_DN24290_c0_g1	10.137	5.86e-13	2.77e-11	UP	TRINITY_DN24290_c0_g1	TraesCS7D01G517100.1	1399	1581	1581	7.83e-68	TraesCS7D01G517100	chr7D	616219269	616221560	F-box family protein
	TRINITY_DN49103_c0_g2	10.137	1.77e-11	6.65e-10	UP	TRINITY_DN49103_c0_g2	TraesCS5A01G003700.1	864	1111	1575	5.46e-120	TraesCS5A01G003700	chr5A	2615913	2617487	ATP-dependent zinc metalloprotease FtsH
	TRINITY_DN13693_c0_g1	10.1369	1.42e-17	1.35e-15	UP	NA	NA	NA	NA	NA	NA	NA	NA	NA	NA	NA
	TRINITY_DN41801_c0_g3	10.1323	1.51e-18	1.63e-16	UP	NA	NA	NA	NA	NA	NA	NA	NA	NA	NA	NA
	TRINITY_DN17978_c0_g2	10.129	7.15e-18	7.08e-16	UP	TRINITY_DN17978_c0_g2	TraesCS2D01G124800.1	883	936	936	2.76e-20	TraesCS2D01G124800	chr2D	73009024	73010051	Short-chain dehydrogenase/reductase
	TRINITY_DN33960_c0_g1	10.1267	3.63e-16	2.82e-14	UP	TRINITY_DN33960_c0_g1	TraesCS5A01G350100.1	1	39	1686	3.64e-12	TraesCS5A01G350100	chr5A	552748777	552752389	NAD(P)-binding Rossmann-fold superfamily protein
	TRINITY_DN10731_c0_g1	10.1228	1.47e-13	7.65e-12	UP	NA	NA	NA	NA	NA	NA	NA	NA	NA	NA	NA
	TRINITY_DN15126_c0_g2	10.1216	1.76e-18	1.9e-16	UP	NA	NA	NA	NA	NA	NA	NA	NA	NA	NA	NA
	TRINITY_DN39812_c2_g3	10.1173	1.22e-10	4.02e-09	UP	NA	NA	NA	NA	NA	NA	NA	NA	NA	NA	NA
	TRINITY_DN46179_c0_g2	10.1167	2.51e-15	1.72e-13	UP	TRINITY_DN46179_c0_g2	TraesCS4B01G347200.1	1797	1868	1878	1.55e-25	TraesCS4B01G347200	chr4B	641173732	641178734	Kinase family protein
	TRINITY_DN194388_c0_g1	10.1131	4.25e-15	2.79e-13	UP	TRINITY_DN194388_c0_g1	TraesCS2B01G005300.1	452	200	1857	9.22e-128	TraesCS2B01G005300	chr2B	3398345	3406093	Sterol 3-beta-glucosyltransferase
	TRINITY_DN1221_c1_g1	10.1087	3.37e-18	3.5e-16	UP	NA	NA	NA	NA	NA	NA	NA	NA	NA	NA	NA
	TRINITY_DN17034_c0_g1	10.1082	2.72e-17	2.5e-15	UP	TRINITY_DN17034_c0_g1	TraesCS7A01G011700.1	3435	3597	3597	8.23e-81	TraesCS7A01G011700	chr7A	5077922	5086332	Acetyl-coenzyme A synthetase
	TRINITY_DN22286_c0_g1	10.103	3.94e-16	3.05e-14	UP	TRINITY_DN22286_c0_g1	TraesCS3A01G003900.1	895	1180	2064	6.42e-125	TraesCS3A01G003900	chr3A	1925388	1928343	Receptor-like kinase
	TRINITY_DN15108_c0_g1	10.1007	9.86e-10	2.85e-08	UP	NA	NA	NA	NA	NA	NA	NA	NA	NA	NA	NA
	TRINITY_DN25324_c0_g1	10.1003	7.86e-14	4.25e-12	UP	TRINITY_DN25324_c0_g1	TraesCS7A01G528700.1	197	423	423	1.28e-104	TraesCS7A01G528700	chr7A	708913267	708919696	Chaperone protein dnaJ
	TRINITY_DN24115_c0_g2	10.095	8.98e-15	5.64e-13	UP	NA	NA	NA	NA	NA	NA	NA	NA	NA	NA	NA
	TRINITY_DN36759_c0_g1	10.0947	2.86e-18	3e-16	UP	NA	NA	NA	NA	NA	NA	NA	NA	NA	NA	NA
	TRINITY_DN19681_c0_g1	10.0838	1.31e-17	1.26e-15	UP	TRINITY_DN19681_c0_g1	TraesCS2B01G259200.1	1	173	1473	4.46e-68	TraesCS2B01G259200	chr2B	320938819	320940291	MEI2-like 2
	TRINITY_DN25557_c0_g1	10.0814	1.02e-11	3.98e-10	UP	NA	NA	NA	NA	NA	NA	NA	NA	NA	NA	NA
	TRINITY_DN13479_c0_g3	10.0808	3.31e-18	3.44e-16	UP	TRINITY_DN13479_c0_g3	TraesCS6A01G001200.1	420	746	900	1.05e-108	TraesCS6A01G001200	chr6A	734214	735473	Zinc finger protein 512B family
	TRINITY_DN9820_c2_g1	10.0777	1.98e-13	1.01e-11	UP	TRINITY_DN9820_c2_g1	TraesCS1D01G361600.1	52	125	243	5.89e-25	TraesCS1D01G361600	chr1D	444341796	444343732	ABC transporter A family protein
	TRINITY_DN18280_c0_g1	10.0728	5.47e-14	3.02e-12	UP	TRINITY_DN18280_c0_g1	TraesCS2A01G004900.1	4515	4611	4764	1.67e-22	TraesCS2A01G004900	chr2A	2488830	2495245	NBS-LRR disease resistance protein-like protein
	TRINITY_DN45585_c0_g1	10.0727	3.49e-13	1.71e-11	UP	TRINITY_DN45585_c0_g1	TraesCS4A01G455800.1	2318	2663	2736	2.59e-179	TraesCS4A01G455800	chr4A	719164439	719168794	Guanine nucleotide-binding protein subunit alpha-like protein
	TRINITY_DN22757_c0_g1	10.0724	3.83e-18	3.95e-16	UP	TRINITY_DN22757_c0_g1	TraesCS7D01G375000.1	1	234	1848	3.85e-120	TraesCS7D01G375000	chr7D	485102407	485104323	Loricrin-like
	TRINITY_DN33307_c0_g2	10.0721	1.1e-17	1.07e-15	UP	TRINITY_DN33307_c0_g2	TraesCS7B01G441000.1	1	1560	1560	0	TraesCS7B01G441000	chr7B	706118143	706130454	Transmembrane protein, putative (DUF247)
	TRINITY_DN30683_c0_g1	10.071	9.32e-15	5.83e-13	UP	NA	NA	NA	NA	NA	NA	NA	NA	NA	NA	NA
	TRINITY_DN16546_c1_g3	10.0709	1.13e-12	5.14e-11	UP	TRINITY_DN16546_c1_g3	TraesCS3B01G030500.1	1425	1653	1926	3.89e-116	TraesCS3B01G030500	chr3B	13961475	13964705	Receptor-like kinase
	TRINITY_DN28947_c0_g1	10.0696	8.31e-17	7.14e-15	UP	NA	NA	NA	NA	NA	NA	NA	NA	NA	NA	NA
	TRINITY_DN16441_c1_g2	10.0677	4.19e-18	4.29e-16	UP	TRINITY_DN16441_c1_g2	TraesCS5A01G557100.1	357	510	510	7.73e-76	TraesCS5A01G557100	chr5A	708183055	708184124	2-oxoglutarate (2OG) and Fe(II)-dependent oxygenase superfamily protein, putative
	TRINITY_DN32812_c0_g1	10.0655	2.66e-09	7.2e-08	UP	TRINITY_DN32812_c0_g1	TraesCSU01G099700.2	238	441	441	2.91e-87	TraesCSU01G099700	chrUn	88195052	88196458	High mobility group protein
	TRINITY_DN24760_c0_g1	10.0644	7.99e-13	3.7e-11	UP	NA	NA	NA	NA	NA	NA	NA	NA	NA	NA	NA
	TRINITY_DN11964_c2_g1	10.0613	4.6e-18	4.66e-16	UP	TRINITY_DN11964_c2_g1	TraesCS2D01G362000.3	1	352	645	1.63e-146	TraesCS2D01G362000	chr2D	468095854	468097899	Coiled-coil domain-containing protein 94-like protein
	TRINITY_DN18998_c1_g2	10.0565	1.47e-23	3.37e-21	UP	NA	NA	NA	NA	NA	NA	NA	NA	NA	NA	NA
	TRINITY_DN60980_c3_g1	10.0549	4.49e-16	3.44e-14	UP	TRINITY_DN60980_c3_g1	TraesCS3B01G030300.1	278	61	1350	1.04e-106	TraesCS3B01G030300	chr3B	13904308	13905657	Cytochrome P450
	TRINITY_DN14472_c0_g3	10.0539	5.53e-18	5.54e-16	UP	TRINITY_DN14472_c0_g3	TraesCS2A01G404700.1	1555	1759	3855	2.28e-71	TraesCS2A01G404700	chr2A	660273152	660291226	Niemann-Pick C1 protein
	TRINITY_DN83039_c0_g1	10.0531	2.04e-17	1.9e-15	UP	NA	NA	NA	NA	NA	NA	NA	NA	NA	NA	NA
	TRINITY_DN141437_c0_g1	10.0527	3.57e-16	2.77e-14	UP	NA	NA	NA	NA	NA	NA	NA	NA	NA	NA	NA
	TRINITY_DN7814_c0_g5	10.0519	5.43e-18	5.47e-16	UP	NA	NA	NA	NA	NA	NA	NA	NA	NA	NA	NA
	TRINITY_DN32058_c0_g1	10.0479	2.74e-10	8.67e-09	UP	NA	NA	NA	NA	NA	NA	NA	NA	NA	NA	NA
	TRINITY_DN42557_c0_g1	10.0479	1.24e-09	3.54e-08	UP	NA	NA	NA	NA	NA	NA	NA	NA	NA	NA	NA
	TRINITY_DN21408_c0_g1	10.0463	5.76e-17	5.05e-15	UP	NA	NA	NA	NA	NA	NA	NA	NA	NA	NA	NA
	TRINITY_DN14514_c0_g1	10.0434	1.11e-16	9.38e-15	UP	NA	NA	NA	NA	NA	NA	NA	NA	NA	NA	NA
	TRINITY_DN20659_c0_g1	10.043	4.14e-14	2.33e-12	UP	NA	NA	NA	NA	NA	NA	NA	NA	NA	NA	NA
	TRINITY_DN4628_c1_g3	10.0418	3.71e-12	1.56e-10	UP	NA	NA	NA	NA	NA	NA	NA	NA	NA	NA	NA
	TRINITY_DN13154_c0_g1	10.0383	2.54e-13	1.27e-11	UP	NA	NA	NA	NA	NA	NA	NA	NA	NA	NA	NA
	TRINITY_DN238576_c0_g1	10.037	6.45e-10	1.92e-08	UP	NA	NA	NA	NA	NA	NA	NA	NA	NA	NA	NA
	TRINITY_DN21559_c0_g1	10.0361	9.44e-18	9.23e-16	UP	NA	NA	NA	NA	NA	NA	NA	NA	NA	NA	NA
	TRINITY_DN142561_c0_g1	10.0352	1.06e-17	1.02e-15	UP	NA	NA	NA	NA	NA	NA	NA	NA	NA	NA	NA
	TRINITY_DN67165_c0_g1	10.0307	2.08e-15	1.45e-13	UP	TRINITY_DN67165_c0_g1	TraesCS7D01G408200.1	1	702	1011	0	TraesCS7D01G408200	chr7D	526000699	526002687	Atrial natriuretic peptide receptor 2
	TRINITY_DN13302_c0_g1	10.0265	3.19e-11	1.16e-09	UP	TRINITY_DN13302_c0_g1	TraesCS2D01G000500.1	651	858	2331	3.59e-96	TraesCS2D01G000500	chr2D	273721	276680	Ethylene receptor
	TRINITY_DN91468_c0_g1	10.026	2.61e-09	7.08e-08	UP	NA	NA	NA	NA	NA	NA	NA	NA	NA	NA	NA
	TRINITY_DN23045_c0_g1	10.0238	1.13e-06	2e-05	UP	NA	NA	NA	NA	NA	NA	NA	NA	NA	NA	NA
	TRINITY_DN12383_c2_g1	10.0229	1.56e-17	1.48e-15	UP	TRINITY_DN12383_c2_g1	TraesCS6A01G189100.4	139	389	558	7.99e-84	TraesCS6A01G189100	chr6A	233955442	233959119	Transcription initiation factor TFIID subunit 1
	TRINITY_DN37189_c1_g1	10.0197	6.26e-16	4.71e-14	UP	TRINITY_DN37189_c1_g1	TraesCS7D01G412400.1	781	576	3012	4.53e-105	TraesCS7D01G412400	chr7D	530907847	530914575	Zinc-transporting ATPase
	TRINITY_DN43222_c1_g1	10.0131	1.58e-11	5.98e-10	UP	TRINITY_DN43222_c1_g1	TraesCS7D01G383100.1	322	524	1248	4.56e-100	TraesCS7D01G383100	chr7D	496785466	496786713	Malate dehydrogenase
	TRINITY_DN22946_c0_g1	10.0077	1.59e-15	1.13e-13	UP	NA	NA	NA	NA	NA	NA	NA	NA	NA	NA	NA
	TRINITY_DN19433_c0_g1	10.0066	1.89e-17	1.77e-15	UP	TRINITY_DN19433_c0_g1	TraesCS2B01G013000.1	212	533	1716	2.43e-169	TraesCS2B01G013000	chr2B	6336890	6340208	Peptide transporter
	TRINITY_DN37965_c0_g2	10.0037	1.71e-14	1.03e-12	UP	TRINITY_DN37965_c0_g2	TraesCSU01G133200.1	2505	2766	4350	2.45e-64	TraesCSU01G133200	chrUn	112600697	112619193	Mitogen-activated protein kinase kinase
	TRINITY_DN51740_c0_g1	9.99815	4.57e-16	3.49e-14	UP	NA	NA	NA	NA	NA	NA	NA	NA	NA	NA	NA
	TRINITY_DN121364_c0_g2	9.99402	4.37e-15	2.86e-13	UP	TRINITY_DN121364_c0_g2	TraesCS1A01G021100.1	1173	1380	1380	6.9e-106	TraesCS1A01G021100	chr1A	10150917	10152296	Anthocyanin 5-aromatic acyltransferase
	TRINITY_DN27978_c1_g2	9.98722	6.51e-17	5.67e-15	UP	TRINITY_DN27978_c1_g2	TraesCS3A01G133700.1	522	770	960	9.47e-68	TraesCS3A01G133700	chr3A	110788252	110792836	Polyadenylate-binding protein
	TRINITY_DN23498_c0_g1	9.98508	2.67e-17	2.44e-15	UP	NA	NA	NA	NA	NA	NA	NA	NA	NA	NA	NA
	TRINITY_DN22868_c0_g3	9.98227	6.49e-17	5.66e-15	UP	TRINITY_DN22868_c0_g3	TraesCS3D01G007600.1	3347	3090	4071	3.41e-122	TraesCS3D01G007600	chr3D	2619817	2627172	Paired amphipathic helix protein Sin3
	TRINITY_DN23699_c0_g1	9.98012	3.72e-17	3.33e-15	UP	NA	NA	NA	NA	NA	NA	NA	NA	NA	NA	NA
	TRINITY_DN37286_c0_g3	9.979	3.93e-13	1.91e-11	UP	TRINITY_DN37286_c0_g3	TraesCS1D01G001500.1	1240	1454	3171	5.15e-60	TraesCS1D01G001500	chr1D	392359	395615	Receptor protein kinase, putative
	TRINITY_DN12984_c1_g4	9.9769	1.16e-09	3.31e-08	UP	TRINITY_DN12984_c1_g4	TraesCS2D01G533800.1	205	267	267	2e-25	TraesCS2D01G533800	chr2D	618060727	618060993	Wound-responsive family protein
	TRINITY_DN12731_c1_g3	9.97603	1.27e-14	7.72e-13	UP	TRINITY_DN12731_c1_g3	TraesCS4B01G395400.1	56	148	429	2.26e-35	TraesCS4B01G395400	chr4B	669575814	669577730	Pentatricopeptide repeat (PPR) superfamily protein
	TRINITY_DN14359_c2_g1	9.97507	1.8e-14	1.07e-12	UP	TRINITY_DN14359_c2_g1	TraesCS7D01G484800.1	1031	1086	1086	1.21e-21	TraesCS7D01G484800	chr7D	595309908	595312126	Dihydroflavonol 4-reductase
	TRINITY_DN9374_c1_g3	9.97299	6.03e-15	3.88e-13	UP	NA	NA	NA	NA	NA	NA	NA	NA	NA	NA	NA
	TRINITY_DN6823_c0_g2	9.97297	2.52e-17	2.32e-15	UP	TRINITY_DN6823_c0_g2	TraesCSU01G008000.1	150	571	945	7.67e-73	TraesCSU01G008000	chrUn	11858190	11859379	Methionine aminopeptidase 1D, mitochondrial
	TRINITY_DN17826_c0_g1	9.96922	4.3e-17	3.83e-15	UP	TRINITY_DN17826_c0_g1	TraesCS2D01G473700.1	1418	1705	2331	1.74e-150	TraesCS2D01G473700	chr2D	577152396	577158953	Homeobox-leucine zipper family protein
	TRINITY_DN20225_c3_g1	9.96799	1.02e-08	2.54e-07	UP	NA	NA	NA	NA	NA	NA	NA	NA	NA	NA	NA
	TRINITY_DN17811_c0_g2	9.96449	1.25e-16	1.04e-14	UP	TRINITY_DN17811_c0_g2	TraesCS1A01G359900.1	266	310	312	2.71e-15	TraesCS1A01G359900	chr1A	541343823	541344134	Histone H4
	TRINITY_DN19878_c0_g1	9.96297	1.27e-10	4.2e-09	UP	TRINITY_DN19878_c0_g1	TraesCS7D01G441500.1	1111	1284	1284	1.02e-71	TraesCS7D01G441500	chr7D	560892427	560893710	Xyloglucan 6-xylosyltransferase 1
	TRINITY_DN9605_c0_g2	9.96204	2.86e-12	1.22e-10	UP	TRINITY_DN9605_c0_g2	TraesCS1A01G228900.1	279	354	585	1.74e-27	TraesCS1A01G228900	chr1A	400965699	400969033	Nucleolar 16
	TRINITY_DN17878_c0_g1	9.96201	3.05e-17	2.76e-15	UP	TRINITY_DN17878_c0_g1	TraesCS7A01G008000.1	274	918	2493	7.37e-162	TraesCS7A01G008000	chr7A	3581583	3585155	Disease resistance protein
	TRINITY_DN11087_c0_g2	9.95947	1.24e-16	1.03e-14	UP	TRINITY_DN11087_c0_g2	TraesCS2A01G000700.1	1	42	699	1.36e-13	TraesCS2A01G000700	chr2A	395708	400932	Histone deacetylase complex subunit SAP30
	TRINITY_DN49826_c0_g1	9.95633	3.49e-17	3.14e-15	UP	NA	NA	NA	NA	NA	NA	NA	NA	NA	NA	NA
	TRINITY_DN79255_c0_g1	9.95407	2.07e-14	1.23e-12	UP	TRINITY_DN79255_c0_g1	TraesCS7D01G339600.1	323	531	840	7.77e-93	TraesCS7D01G339600	chr7D	433875900	433876949	Aquaporin
	TRINITY_DN28868_c0_g6	9.95296	3.71e-11	1.33e-09	UP	TRINITY_DN28868_c0_g6	TraesCS1A01G018600.1	1853	1938	1938	1.74e-31	TraesCS1A01G018600	chr1A	9553967	9556916	Receptor-like kinase
	TRINITY_DN37884_c0_g1	9.9497	2.85e-17	2.6e-15	UP	NA	NA	NA	NA	NA	NA	NA	NA	NA	NA	NA
	TRINITY_DN42801_c0_g1	9.94757	6.65e-16	4.99e-14	UP	NA	NA	NA	NA	NA	NA	NA	NA	NA	NA	NA
	TRINITY_DN226872_c0_g1	9.94731	6.17e-11	2.14e-09	UP	TRINITY_DN226872_c0_g1	TraesCS3D01G113500.1	441	534	696	2.59e-29	TraesCS3D01G113500	chr3D	67534446	67536037	UV radiation resistance-associated gene protein
	TRINITY_DN49141_c0_g1	9.94639	2.58e-15	1.76e-13	UP	TRINITY_DN49141_c0_g1	TraesCS7D01G460700.2	998	1257	1263	5.64e-135	TraesCS7D01G460700	chr7D	577257760	577260557	Phosphoglycerate kinase
	TRINITY_DN49739_c0_g1	9.94424	1.66e-08	4e-07	UP	NA	NA	NA	NA	NA	NA	NA	NA	NA	NA	NA
	TRINITY_DN1671_c2_g1	9.94366	3.18e-17	2.87e-15	UP	TRINITY_DN1671_c2_g1	TraesCS6A01G319400.2	1	192	1179	4.22e-97	TraesCS6A01G319400	chr6A	554832779	554836056	F-box family protein
	TRINITY_DN21449_c0_g3	9.94139	2.47e-16	1.97e-14	UP	TRINITY_DN21449_c0_g3	TraesCSU01G243600.1	579	648	648	1.99e-29	TraesCSU01G243600	chrUn	364735062	364735709	Disease resistance protein (TIR-NBS-LRR class) family
	TRINITY_DN23821_c0_g2	9.93999	7.74e-14	4.19e-12	UP	TRINITY_DN23821_c0_g2	TraesCS2A01G033600.1	1057	1110	1110	2.46e-20	TraesCS2A01G033600	chr2A	14997512	14998838	Chitinase
	TRINITY_DN89580_c0_g3	9.93889	5.05e-17	4.44e-15	UP	TRINITY_DN89580_c0_g3	TraesCS6A01G421100.1	1	186	1128	6.27e-94	TraesCS6A01G421100	chr6A	617686259	617687386	Homoserine kinase
	TRINITY_DN53320_c0_g2	9.93823	4e-17	3.58e-15	UP	NA	NA	NA	NA	NA	NA	NA	NA	NA	NA	NA
	TRINITY_DN44271_c0_g1	9.93574	4.25e-11	1.51e-09	UP	TRINITY_DN44271_c0_g1	TraesCS5B01G484800.1	4774	5038	6705	9.92e-138	TraesCS5B01G484800	chr5B	656251427	656260704	SCAR family protein
	TRINITY_DN16371_c0_g1	9.93377	4.96e-17	4.36e-15	UP	NA	NA	NA	NA	NA	NA	NA	NA	NA	NA	NA
	TRINITY_DN27390_c0_g1	9.93207	7.41e-15	4.71e-13	UP	NA	NA	NA	NA	NA	NA	NA	NA	NA	NA	NA
	TRINITY_DN48805_c0_g1	9.927	1.88e-16	1.53e-14	UP	NA	NA	NA	NA	NA	NA	NA	NA	NA	NA	NA
	TRINITY_DN11733_c0_g1	9.92079	8.92e-15	5.61e-13	UP	NA	NA	NA	NA	NA	NA	NA	NA	NA	NA	NA
	TRINITY_DN11415_c2_g3	9.91727	1e-09	2.89e-08	UP	TRINITY_DN11415_c2_g3	TraesCS7D01G544300.1	4150	4260	4260	1e-51	TraesCS7D01G544300	chr7D	632079679	632084638	NBS-LRR-like resistance protein
	TRINITY_DN7889_c0_g2	9.91664	2.46e-43	1.06e-39	UP	TRINITY_DN7889_c0_g2	TraesCS7D01G430900.1	998	1	1023	0	TraesCS7D01G430900	chr7D	550236942	550237964	gamma-irradiation and mitomycin c induced 1
	TRINITY_DN13173_c0_g1	9.91538	8.64e-17	7.4e-15	UP	TRINITY_DN13173_c0_g1	TraesCS5B01G534600.1	280	439	1449	2.23e-64	TraesCS5B01G534600	chr5B	690906301	690909499	ATP-dependent RNA helicase
	TRINITY_DN13491_c2_g1	9.91212	5.85e-09	1.5e-07	UP	TRINITY_DN13491_c2_g1	TraesCS5A01G474400.1	1377	1653	1653	4.27e-144	TraesCS5A01G474400	chr5A	650280577	650282665	Receptor-kinase, putative
	TRINITY_DN11876_c0_g1	9.91085	5.15e-16	3.9e-14	UP	TRINITY_DN11876_c0_g1	TraesCS3A01G343200.1	71	235	519	5.27e-70	TraesCS3A01G343200	chr3A	590363970	590368698	BSD domain-containing protein
	TRINITY_DN49596_c0_g1	9.90677	3.04e-15	2.04e-13	UP	NA	NA	NA	NA	NA	NA	NA	NA	NA	NA	NA
	TRINITY_DN41198_c1_g2	9.90564	6.39e-16	4.8e-14	UP	NA	NA	NA	NA	NA	NA	NA	NA	NA	NA	NA
	TRINITY_DN16929_c1_g1	9.90554	8.31e-16	6.14e-14	UP	TRINITY_DN16929_c1_g1	TraesCS7A01G008600.1	1350	1479	2205	1.11e-47	TraesCS7A01G008600	chr7A	3845602	3850842	3-methyl-2-oxobutanoate hydroxymethyltransferase
	TRINITY_DN24511_c0_g3	9.90406	8.89e-14	4.77e-12	UP	TRINITY_DN24511_c0_g3	TraesCS1B01G348800.1	723	2325	2352	0	TraesCS1B01G348800	chr1B	578092388	578096675	receptor kinase 1
	TRINITY_DN20987_c0_g1	9.90254	2.13e-15	1.48e-13	UP	NA	NA	NA	NA	NA	NA	NA	NA	NA	NA	NA
	TRINITY_DN36748_c0_g2	9.89805	6.87e-17	5.97e-15	UP	TRINITY_DN36748_c0_g2	TraesCS3B01G490600.3	199	306	690	5.1e-50	TraesCS3B01G490600	chr3B	736672123	736673291	Glutathione S-transferase
	TRINITY_DN32017_c0_g1	9.89676	1.5e-16	1.24e-14	UP	NA	NA	NA	NA	NA	NA	NA	NA	NA	NA	NA
	TRINITY_DN2364_c0_g2	9.89139	9.88e-14	5.26e-12	UP	NA	NA	NA	NA	NA	NA	NA	NA	NA	NA	NA
	TRINITY_DN17369_c0_g1	9.88915	2.59e-16	2.06e-14	UP	TRINITY_DN17369_c0_g1	TraesCS1B01G409300.1	1	176	582	1.21e-86	TraesCS1B01G409300	chr1B	636753327	636754505	Photosynthetic NDH subcomplex B 3
	TRINITY_DN17016_c1_g1	9.88762	3.55e-15	2.37e-13	UP	NA	NA	NA	NA	NA	NA	NA	NA	NA	NA	NA
	TRINITY_DN48724_c0_g4	9.88728	1.35e-13	7.1e-12	UP	TRINITY_DN48724_c0_g4	TraesCSU01G164700.2	1	925	2052	0	TraesCSU01G164700	chrUn	238778539	238785868	Receptor-like kinase
	TRINITY_DN11782_c1_g2	9.88638	1.44e-10	4.73e-09	UP	NA	NA	NA	NA	NA	NA	NA	NA	NA	NA	NA
	TRINITY_DN12398_c2_g1	9.88635	2.51e-11	9.21e-10	UP	TRINITY_DN12398_c2_g1	TraesCS1D01G003400.1	252	387	399	1.39e-48	TraesCS1D01G003400	chr1D	1025499	1026462	Fatty acyl-CoA reductase
	TRINITY_DN20091_c2_g1	9.8856	2.09e-15	1.46e-13	UP	NA	NA	NA	NA	NA	NA	NA	NA	NA	NA	NA
	TRINITY_DN15730_c1_g1	9.8842	2.27e-16	1.82e-14	UP	TRINITY_DN15730_c1_g1	TraesCS5B01G484800.1	5051	5274	6705	4.91e-115	TraesCS5B01G484800	chr5B	656251427	656260704	SCAR family protein
	TRINITY_DN45451_c0_g1	9.88185	2.18e-16	1.76e-14	UP	TRINITY_DN45451_c0_g1	TraesCS7A01G567500.1	5044	5235	5253	1.8e-75	TraesCS7A01G567500	chr7A	736088791	736096134	NBS-LRR disease resistance protein
	TRINITY_DN13364_c0_g2	9.88055	8.97e-17	7.66e-15	UP	NA	NA	NA	NA	NA	NA	NA	NA	NA	NA	NA
	TRINITY_DN40191_c0_g1	9.87859	1.13e-10	3.75e-09	UP	TRINITY_DN40191_c0_g1	TraesCS7D01G414600.1	300	348	348	9.73e-18	TraesCS7D01G414600	chr7D	532898280	532898900	Macrophage migration inhibitory factor
	TRINITY_DN90266_c0_g1	9.87248	1.73e-12	7.64e-11	UP	NA	NA	NA	NA	NA	NA	NA	NA	NA	NA	NA
	TRINITY_DN23360_c0_g1	9.86581	3.94e-16	3.05e-14	UP	TRINITY_DN23360_c0_g1	TraesCS7D01G446100.1	636	960	1035	5.27e-171	TraesCS7D01G446100	chr7D	566554168	566558428	F-box/LRR repeat protein
	TRINITY_DN12864_c0_g1	9.8611	3.99e-35	4.96e-32	UP	NA	NA	NA	NA	NA	NA	NA	NA	NA	NA	NA
	TRINITY_DN19865_c0_g1	9.85773	1.47e-16	1.22e-14	UP	TRINITY_DN19865_c0_g1	TraesCS7D01G403600.1	1046	1275	1275	3.36e-118	TraesCS7D01G403600	chr7D	520516473	520520394	Isoprenylcysteine alpha-carbonyl methylesterase ICME protein
	TRINITY_DN11660_c0_g1	9.85738	2.83e-16	2.23e-14	UP	NA	NA	NA	NA	NA	NA	NA	NA	NA	NA	NA
	TRINITY_DN33825_c0_g2	9.85624	6.28e-12	2.55e-10	UP	TRINITY_DN33825_c0_g2	TraesCS3A01G017100.1	1885	2052	2052	2.11e-65	TraesCS3A01G017100	chr3A	10951562	10954096	Receptor-like kinase
	TRINITY_DN31667_c1_g1	9.85243	6.7e-15	4.28e-13	UP	TRINITY_DN31667_c1_g1	TraesCS2A01G360000.1	357	414	480	1.38e-17	TraesCS2A01G360000	chr2A	603855754	603856938	Cysteine-rich receptor-like protein kinase 41
	TRINITY_DN5254_c0_g1	9.84687	1.96e-16	1.6e-14	UP	TRINITY_DN5254_c0_g1	TraesCS2B01G256800.1	273	555	1872	1.18e-107	TraesCS2B01G256800	chr2B	300253952	300261762	Malic enzyme
	TRINITY_DN39188_c0_g1	9.84673	6.18e-12	2.51e-10	UP	NA	NA	NA	NA	NA	NA	NA	NA	NA	NA	NA
	TRINITY_DN52201_c0_g2	9.8452	1.78e-16	1.45e-14	UP	NA	NA	NA	NA	NA	NA	NA	NA	NA	NA	NA
	TRINITY_DN80018_c2_g1	9.84418	1.91e-16	1.56e-14	UP	NA	NA	NA	NA	NA	NA	NA	NA	NA	NA	NA
	TRINITY_DN5087_c3_g1	9.83768	2.25e-16	1.81e-14	UP	TRINITY_DN5087_c3_g1	TraesCS7A01G005100.1	1473	2404	3423	0	TraesCS7A01G005100	chr7A	2694421	2700489	NBS-LRR disease resistance protein, putative
	TRINITY_DN115795_c0_g1	9.83592	2.08e-10	6.67e-09	UP	NA	NA	NA	NA	NA	NA	NA	NA	NA	NA	NA
	TRINITY_DN18107_c2_g1	9.83527	2.03e-16	1.64e-14	UP	TRINITY_DN18107_c2_g1	TraesCS7A01G402800.1	167	109	264	8.98e-10	TraesCS7A01G402800	chr7A	582569207	582569622	glucan synthase-like 3
	TRINITY_DN47611_c0_g1	9.83272	3.36e-14	1.93e-12	UP	TRINITY_DN47611_c0_g1	TraesCS3A01G505600.1	1246	1481	2379	5.17e-120	TraesCS3A01G505600	chr3A	727397644	727400541	Disease resistance protein RPM1
	TRINITY_DN30783_c0_g2	9.83043	2.93e-16	2.3e-14	UP	TRINITY_DN30783_c0_g2	TraesCS7A01G540400.1	1	108	633	1.58e-50	TraesCS7A01G540400	chr7A	717388824	717394340	Protein kinase family protein
	TRINITY_DN23483_c3_g1	9.82943	9.02e-16	6.64e-14	UP	NA	NA	NA	NA	NA	NA	NA	NA	NA	NA	NA
	TRINITY_DN86364_c0_g1	9.8294	2.66e-16	2.12e-14	UP	TRINITY_DN86364_c0_g1	TraesCS2B01G628400.1	337	938	1758	0	TraesCS2B01G628400	chr2B	799968753	799972183	CsAtPR5
	TRINITY_DN15881_c1_g1	9.82322	2.55e-15	1.75e-13	UP	TRINITY_DN15881_c1_g1	TraesCS7B01G461600.1	174	942	942	0	TraesCS7B01G461600	chr7B	718850191	718851616	receptor kinase 1
	TRINITY_DN40122_c0_g1	9.82191	9.87e-15	6.13e-13	UP	TRINITY_DN40122_c0_g1	TraesCS3D01G001400.1	169	456	1476	3.85e-122	TraesCS3D01G001400	chr3D	707880	709355	Glycosyltransferase
	TRINITY_DN28566_c0_g1	9.82032	5.03e-13	2.39e-11	UP	TRINITY_DN28566_c0_g1	TraesCS7A01G033500.1	1808	1596	2727	2.81e-107	TraesCS7A01G033500	chr7A	14730462	14734786	Guanine nucleotide-binding protein subunit alpha-like protein
	TRINITY_DN35137_c1_g1	9.81972	2.64e-15	1.8e-13	UP	TRINITY_DN35137_c1_g1	TraesCS7D01G131200.1	1704	1627	1704	9.21e-23	TraesCS7D01G131200	chr7D	83339642	83344929	Disease resistance protein (TIR-NBS-LRR class) family
	TRINITY_DN22258_c0_g1	9.81941	7.51e-16	5.56e-14	UP	TRINITY_DN22258_c0_g1	TraesCS5B01G422400.1	3044	3593	5631	0	TraesCS5B01G422400	chr5B	597289088	597305326	NBS-LRR-like resistance protein
	TRINITY_DN20740_c0_g2	9.81699	4.34e-16	3.33e-14	UP	NA	NA	NA	NA	NA	NA	NA	NA	NA	NA	NA
	TRINITY_DN72167_c0_g3	9.81677	3.51e-14	2e-12	UP	NA	NA	NA	NA	NA	NA	NA	NA	NA	NA	NA
	TRINITY_DN25433_c0_g1	9.81521	3.09e-16	2.42e-14	UP	TRINITY_DN25433_c0_g1	TraesCS7A01G563600.1	1	153	540	1.32e-75	TraesCS7A01G563600	chr7A	733569904	733571662	Thioredoxin
	TRINITY_DN25159_c0_g1	9.81346	1.32e-15	9.49e-14	UP	NA	NA	NA	NA	NA	NA	NA	NA	NA	NA	NA
	TRINITY_DN12416_c0_g4	9.81187	2.12e-14	1.26e-12	UP	NA	NA	NA	NA	NA	NA	NA	NA	NA	NA	NA
	TRINITY_DN79608_c0_g1	9.80962	3.54e-16	2.75e-14	UP	TRINITY_DN79608_c0_g1	TraesCS2A01G249400.1	166	438	1104	3.54e-142	TraesCS2A01G249400	chr2A	374720811	374721914	core-2/I-branching beta-1,6-N-acetylglucosaminyltransferase family protein
	TRINITY_DN5409_c0_g2	9.80577	1.08e-15	7.86e-14	UP	TRINITY_DN5409_c0_g2	TraesCS6B01G362200.1	1	325	930	2.52e-169	TraesCS6B01G362200	chr6B	633896583	633898132	Superoxide dismutase [Cu-Zn]
	TRINITY_DN49003_c0_g1	9.80243	6.6e-10	1.96e-08	UP	TRINITY_DN49003_c0_g1	TraesCS4B01G395700.1	61	132	3078	1.2e-28	TraesCS4B01G395700	chr4B	670400398	670410140	AP-2 complex subunit alpha-1
	TRINITY_DN25510_c0_g1	9.80155	6.16e-12	2.5e-10	UP	NA	NA	NA	NA	NA	NA	NA	NA	NA	NA	NA
	TRINITY_DN46926_c0_g4	9.79467	1.33e-11	5.08e-10	UP	TRINITY_DN46926_c0_g4	TraesCS3B01G501400.1	1381	1592	1752	2.16e-108	TraesCS3B01G501400	chr3B	745448077	745450619	F-box family protein
	TRINITY_DN126908_c0_g1	9.79457	5.4e-16	4.09e-14	UP	TRINITY_DN126908_c0_g1	TraesCS2D01G029700.1	1449	1512	1512	1.36e-22	TraesCS2D01G029700	chr2D	12290200	12291828	Cytochrome P450
	TRINITY_DN17546_c0_g3	9.79419	4.1e-16	3.16e-14	UP	NA	NA	NA	NA	NA	NA	NA	NA	NA	NA	NA
	TRINITY_DN20915_c0_g2	9.79279	1.93e-15	1.36e-13	UP	TRINITY_DN20915_c0_g2	TraesCS1B01G469900.1	91	289	330	5.98e-61	TraesCS1B01G469900	chr1B	678499279	678501950	Deoxyuridine 5'-triphosphate nucleotidohydrolase
	TRINITY_DN21845_c0_g1	9.79114	8.64e-14	4.64e-12	UP	NA	NA	NA	NA	NA	NA	NA	NA	NA	NA	NA
	TRINITY_DN21371_c0_g2	9.78615	2.41e-14	1.42e-12	UP	NA	NA	NA	NA	NA	NA	NA	NA	NA	NA	NA
	TRINITY_DN9464_c0_g1	9.78309	2.92e-14	1.7e-12	UP	NA	NA	NA	NA	NA	NA	NA	NA	NA	NA	NA
	TRINITY_DN51557_c0_g2	9.78139	7.01e-16	5.23e-14	UP	TRINITY_DN51557_c0_g2	TraesCS7A01G372700.1	1	476	480	0	TraesCS7A01G372700	chr7A	546025321	546026700	Topoisomerase DNA-binding C4 zinc finger protein, putative
	TRINITY_DN15749_c0_g1	9.77566	9.6e-11	3.22e-09	UP	NA	NA	NA	NA	NA	NA	NA	NA	NA	NA	NA
	TRINITY_DN18745_c0_g1	9.77072	7.35e-16	5.47e-14	UP	TRINITY_DN18745_c0_g1	TraesCS6D01G381800.1	1	93	1506	6.57e-42	TraesCS6D01G381800	chr6D	462024821	462027738	F-box family protein
	TRINITY_DN92068_c0_g1	9.77001	2.05e-15	1.43e-13	UP	NA	NA	NA	NA	NA	NA	NA	NA	NA	NA	NA
	TRINITY_DN12783_c1_g2	9.76683	2.88e-14	1.67e-12	UP	NA	NA	NA	NA	NA	NA	NA	NA	NA	NA	NA
	TRINITY_DN23021_c1_g2	9.76594	2.56e-14	1.5e-12	UP	TRINITY_DN23021_c1_g2	TraesCS3A01G133500.1	162	228	351	3.25e-24	TraesCS3A01G133500	chr3A	110680985	110682455	Guanine nucleotide-binding protein-like NSN1
	TRINITY_DN31252_c0_g1	9.76217	5.07e-14	2.8e-12	UP	NA	NA	NA	NA	NA	NA	NA	NA	NA	NA	NA
	TRINITY_DN41940_c0_g1	9.76184	2.1e-12	9.18e-11	UP	NA	NA	NA	NA	NA	NA	NA	NA	NA	NA	NA
	TRINITY_DN8586_c0_g4	9.76151	1.03e-13	5.47e-12	UP	NA	NA	NA	NA	NA	NA	NA	NA	NA	NA	NA
	TRINITY_DN40708_c0_g1	9.76107	3.73e-14	2.12e-12	UP	NA	NA	NA	NA	NA	NA	NA	NA	NA	NA	NA
	TRINITY_DN23234_c1_g1	9.76057	1.75e-15	1.24e-13	UP	TRINITY_DN23234_c1_g1	TraesCS7A01G432100.1	86	1	1203	2.57e-38	TraesCS7A01G432100	chr7A	625742878	625745930	Zinc finger protein
	TRINITY_DN32608_c0_g1	9.75439	2.45e-14	1.44e-12	UP	TRINITY_DN32608_c0_g1	TraesCS5D01G066000.1	1486	1587	2268	7.5e-33	TraesCS5D01G066000	chr5D	61466862	61476321	Inter-alpha-trypsin inhibitor heavy chain, putative
	TRINITY_DN22485_c0_g1	9.75376	1.73e-15	1.23e-13	UP	NA	NA	NA	NA	NA	NA	NA	NA	NA	NA	NA
	TRINITY_DN14008_c0_g2	9.75306	2.66e-14	1.56e-12	UP	TRINITY_DN14008_c0_g2	TraesCS7A01G516300.1	95	123	123	2.01e-06	TraesCS7A01G516300	chr7A	701360621	701360743	Rotundifolia-like protein
	TRINITY_DN8159_c0_g1	9.75225	4.56e-15	2.98e-13	UP	TRINITY_DN8159_c0_g1	TraesCS7D01G419200.1	798	861	861	6.34e-26	TraesCS7D01G419200	chr7D	538602652	538603730	Xyloglucan endotransglucosylase/hydrolase
	TRINITY_DN190154_c0_g1	9.75013	1.5e-10	4.89e-09	UP	NA	NA	NA	NA	NA	NA	NA	NA	NA	NA	NA
	TRINITY_DN11022_c4_g2	9.74783	5.75e-08	1.28e-06	UP	TRINITY_DN11022_c4_g2	TraesCS4A01G444900.1	205	447	2751	3.21e-117	TraesCS4A01G444900	chr4A	713032337	713035659	NBS-LRR disease resistance protein, putative, expressed
	TRINITY_DN20772_c0_g1	9.74779	2.53e-09	6.88e-08	UP	TRINITY_DN20772_c0_g1	TraesCS6A01G413700.1	761	982	2028	6.29e-114	TraesCS6A01G413700	chr6A	614645391	614650680	Calcium-dependent lipid-binding (CaLB domain) family protein
	TRINITY_DN115034_c0_g1	9.74673	3.24e-06	5.16e-05	UP	TRINITY_DN115034_c0_g1	TraesCS2A01G030000.1	2942	3144	3285	2.1e-93	TraesCS2A01G030000	chr2A	13811892	13815254	NBS-LRR-like resistance protein
	TRINITY_DN14710_c0_g1	9.74656	2.75e-13	1.37e-11	UP	NA	NA	NA	NA	NA	NA	NA	NA	NA	NA	NA
	TRINITY_DN5546_c1_g1	9.74575	2.61e-15	1.78e-13	UP	NA	NA	NA	NA	NA	NA	NA	NA	NA	NA	NA
	TRINITY_DN18794_c0_g1	9.74543	3.93e-13	1.91e-11	UP	TRINITY_DN18794_c0_g1	TraesCS7A01G392700.1	256	339	339	3.38e-30	TraesCS7A01G392700	chr7A	570113313	570114523	Transmembrane-like protein
	TRINITY_DN65200_c0_g1	9.74349	1.36e-15	9.77e-14	UP	TRINITY_DN65200_c0_g1	TraesCS7A01G003600.1	1059	1545	1545	0	TraesCS7A01G003600	chr7A	1849290	1852248	Homogentisate 1,2-dioxygenase
	TRINITY_DN2249_c1_g1	9.74274	2.36e-14	1.39e-12	UP	NA	NA	NA	NA	NA	NA	NA	NA	NA	NA	NA
	TRINITY_DN21736_c0_g1	9.74106	7.49e-11	2.56e-09	UP	NA	NA	NA	NA	NA	NA	NA	NA	NA	NA	NA
	TRINITY_DN202871_c0_g1	9.74091	2.24e-15	1.55e-13	UP	NA	NA	NA	NA	NA	NA	NA	NA	NA	NA	NA
	TRINITY_DN15651_c0_g2	9.73911	1.08e-15	7.87e-14	UP	TRINITY_DN15651_c0_g2	TraesCS4A01G026300.1	3664	4078	4410	6.27e-57	TraesCS4A01G026300	chr4A	18116285	18123914	receptor kinase 1
	TRINITY_DN13193_c0_g1	9.738	1.62e-14	9.75e-13	UP	NA	NA	NA	NA	NA	NA	NA	NA	NA	NA	NA
	TRINITY_DN46024_c0_g1	9.73692	1.16e-15	8.39e-14	UP	TRINITY_DN46024_c0_g1	TraesCS7B01G427800.1	3522	3746	4485	1.66e-115	TraesCS7B01G427800	chr7B	697073102	697081669	Receptor-like protein kinase
	TRINITY_DN48550_c0_g1	9.73533	3.51e-13	1.72e-11	UP	TRINITY_DN48550_c0_g1	TraesCS7D01G459500.1	1	1053	1053	0	TraesCS7D01G459500	chr7D	576694196	576695248	BTB/POZ domain containing protein, expressed
	TRINITY_DN26726_c0_g1	9.7342	2.54e-13	1.27e-11	UP	TRINITY_DN26726_c0_g1	TraesCS1A01G034900.1	1	368	1494	0	TraesCS1A01G034900	chr1A	18084403	18086010	Cytochrome P450, putative
	TRINITY_DN71329_c0_g1	9.73192	1.33e-13	7.01e-12	UP	TRINITY_DN71329_c0_g1	TraesCS1A01G195000.1	732	932	1677	2.17e-75	TraesCS1A01G195000	chr1A	352013037	352016495	Replication protein A DNA-binding subunit
	TRINITY_DN92231_c0_g2	9.73063	1.6e-15	1.14e-13	UP	NA	NA	NA	NA	NA	NA	NA	NA	NA	NA	NA
	TRINITY_DN14343_c1_g5	9.72933	6.97e-11	2.4e-09	UP	NA	NA	NA	NA	NA	NA	NA	NA	NA	NA	NA
	TRINITY_DN89709_c0_g1	9.72701	3.46e-15	2.31e-13	UP	TRINITY_DN89709_c0_g1	TraesCS6B01G442900.1	339	640	1557	6.93e-110	TraesCS6B01G442900	chr6B	706324653	706333117	Receptor-like protein kinase
	TRINITY_DN251325_c0_g1	9.7259	4.25e-15	2.79e-13	UP	TRINITY_DN251325_c0_g1	TraesCS2D01G030500.1	1	1095	1095	0	TraesCS2D01G030500	chr2D	12412871	12414792	O-methyltransferase family protein
	TRINITY_DN43302_c0_g1	9.72552	1.8e-15	1.27e-13	UP	TRINITY_DN43302_c0_g1	TraesCS5A01G206200.1	880	1713	2286	0	TraesCS5A01G206200	chr5A	416169030	416172694	E3 ubiquitin-protein ligase SINA-like 10
	TRINITY_DN57355_c0_g1	9.72511	1.35e-15	9.73e-14	UP	TRINITY_DN57355_c0_g1	TraesCS5D01G289700.1	1143	1201	1374	1.23e-17	TraesCS5D01G289700	chr5D	388289469	388292097	hAT transposon superfamily
	TRINITY_DN61132_c0_g1	9.72342	2.24e-07	4.51e-06	UP	NA	NA	NA	NA	NA	NA	NA	NA	NA	NA	NA
	TRINITY_DN91206_c0_g1	9.72249	1.68e-15	1.2e-13	UP	TRINITY_DN91206_c0_g1	TraesCS7D01G375700.1	1449	1504	1512	1.19e-21	TraesCS7D01G375700	chr7D	486057132	486062283	Polyamine oxidase
	TRINITY_DN3068_c3_g1	9.71828	1.56e-13	8.08e-12	UP	NA	NA	NA	NA	NA	NA	NA	NA	NA	NA	NA
	TRINITY_DN31006_c0_g1	9.71731	1.43e-12	6.4e-11	UP	NA	NA	NA	NA	NA	NA	NA	NA	NA	NA	NA
	TRINITY_DN48724_c0_g2	9.71531	4.16e-13	2.01e-11	UP	TRINITY_DN48724_c0_g2	TraesCS3A01G017900.1	11	857	1977	0	TraesCS3A01G017900	chr3A	11378495	11380964	Receptor-like kinase
	TRINITY_DN46709_c0_g1	9.71391	3e-15	2.02e-13	UP	NA	NA	NA	NA	NA	NA	NA	NA	NA	NA	NA
	TRINITY_DN36626_c0_g1	9.71387	1.33e-11	5.07e-10	UP	TRINITY_DN36626_c0_g1	TraesCS7D01G460700.1	557	757	981	2.65e-102	TraesCS7D01G460700	chr7D	577257760	577260557	Phosphoglycerate kinase
	TRINITY_DN30747_c0_g1	9.71098	1.74e-15	1.23e-13	UP	TRINITY_DN30747_c0_g1	TraesCS7A01G008600.1	1929	2156	2205	3.06e-102	TraesCS7A01G008600	chr7A	3845602	3850842	3-methyl-2-oxobutanoate hydroxymethyltransferase
	TRINITY_DN16228_c0_g1	9.70763	2.21e-15	1.53e-13	UP	TRINITY_DN16228_c0_g1	TraesCS1B01G000100.1	667	954	4011	4.94e-129	TraesCS1B01G000100	chr1B	168824	173426	disease resistance protein (TIR-NBS-LRR class)
	TRINITY_DN21595_c0_g4	9.70417	5.82e-15	3.76e-13	UP	TRINITY_DN21595_c0_g4	TraesCS4A01G223500.1	537	3524	3525	0	TraesCS4A01G223500	chr4A	531236819	531241694	Disease resistance protein RPM1
	TRINITY_DN25034_c0_g1	9.70204	1.72e-10	5.58e-09	UP	NA	NA	NA	NA	NA	NA	NA	NA	NA	NA	NA
	TRINITY_DN15808_c1_g1	9.70035	1.43e-13	7.46e-12	UP	NA	NA	NA	NA	NA	NA	NA	NA	NA	NA	NA
	TRINITY_DN17392_c0_g1	9.69896	3.62e-14	2.06e-12	UP	NA	NA	NA	NA	NA	NA	NA	NA	NA	NA	NA
	TRINITY_DN103767_c0_g1	9.69701	5.92e-15	3.82e-13	UP	TRINITY_DN103767_c0_g1	TraesCS2D01G015100.1	345	609	828	2.16e-114	TraesCS2D01G015100	chr2D	7203059	7203886	Sulfotransferase
	TRINITY_DN15535_c0_g1	9.69445	2.82e-15	1.9e-13	UP	TRINITY_DN15535_c0_g1	TraesCS1D01G029900.1	1	2249	3210	0	TraesCS1D01G029900	chr1D	11658941	11662150	NBS-LRR disease resistance protein-like protein
	TRINITY_DN41220_c0_g2	9.69209	8.85e-15	5.57e-13	UP	TRINITY_DN41220_c0_g2	TraesCS6A01G361800.1	568	636	1326	3.8e-21	TraesCS6A01G361800	chr6A	592011525	592013862	UNC93-like protein 2
	TRINITY_DN30728_c0_g1	9.68801	8.02e-14	4.33e-12	UP	TRINITY_DN30728_c0_g1	TraesCS7D01G525000.1	106	389	1086	2.83e-148	TraesCS7D01G525000	chr7D	620983945	620986294	receptor kinase 1
	TRINITY_DN224855_c0_g1	9.68742	1.32e-10	4.36e-09	UP	NA	NA	NA	NA	NA	NA	NA	NA	NA	NA	NA
	TRINITY_DN59273_c2_g1	9.6873	1.18e-12	5.36e-11	UP	TRINITY_DN59273_c2_g1	TraesCS7A01G561500.1	1176	1007	1176	8.9e-34	TraesCS7A01G561500	chr7A	732596946	732602222	DNA-binding protein RHL1
	TRINITY_DN39996_c0_g1	9.68455	2.78e-15	1.88e-13	UP	TRINITY_DN39996_c0_g1	TraesCS6D01G046700.1	1022	1203	1203	1.16e-71	TraesCS6D01G046700	chr6D	20851603	20853694	Ulp1 protease family, C-terminal catalytic domain containing protein, expressed
	TRINITY_DN42246_c0_g1	9.67897	1.58e-11	5.98e-10	UP	NA	NA	NA	NA	NA	NA	NA	NA	NA	NA	NA
	TRINITY_DN39878_c0_g1	9.67761	9.1e-15	5.7e-13	UP	NA	NA	NA	NA	NA	NA	NA	NA	NA	NA	NA
	TRINITY_DN63171_c0_g1	9.67204	3.12e-13	1.54e-11	UP	TRINITY_DN63171_c0_g1	TraesCS6B01G034300.1	2390	2772	2772	2.19e-124	TraesCS6B01G034300	chr6B	20698716	20706062	Receptor-like protein kinase
	TRINITY_DN32818_c1_g2	9.66958	3.96e-15	2.61e-13	UP	TRINITY_DN32818_c1_g2	TraesCS7D01G406200.1	233	517	1719	7.9e-149	TraesCS7D01G406200	chr7D	523275807	523277940	Peptide transporter
	TRINITY_DN3236_c2_g1	9.66812	9.4e-15	5.87e-13	UP	TRINITY_DN3236_c2_g1	TraesCS5D01G111800.1	407	474	558	3.14e-23	TraesCS5D01G111800	chr5D	127056549	127059740	Ubiquitin carboxyl-terminal hydrolase-related protein
	TRINITY_DN24840_c0_g2	9.66571	5.51e-15	3.57e-13	UP	NA	NA	NA	NA	NA	NA	NA	NA	NA	NA	NA
	TRINITY_DN51512_c0_g1	9.66146	2.57e-14	1.51e-12	UP	TRINITY_DN51512_c0_g1	TraesCS7A01G011700.2	3267	3447	3447	7.09e-84	TraesCS7A01G011700	chr7A	5077922	5086332	Acetyl-coenzyme A synthetase
	TRINITY_DN19149_c0_g3	9.65663	9.6e-13	4.41e-11	UP	TRINITY_DN19149_c0_g3	TraesCSU01G112400.2	1	35	4458	1.3e-09	TraesCSU01G112400	chrUn	96294536	96300439	NBS-LRR-like resistance protein
	TRINITY_DN17072_c0_g1	9.65372	4.66e-15	3.04e-13	UP	TRINITY_DN17072_c0_g1	TraesCS5B01G451600.1	1	254	1464	7.1e-130	TraesCS5B01G451600	chr5B	623108761	623118014	Tyrosine-protein kinase Fyn
	TRINITY_DN42676_c0_g1	9.65316	1.7e-06	2.89e-05	UP	TRINITY_DN42676_c0_g1	TraesCSU01G035000.1	709	789	789	5.62e-27	TraesCSU01G035000	chrUn	30136993	30137781	non-intrinsic ABC protein 12
	TRINITY_DN148834_c0_g1	9.65258	9.25e-14	4.94e-12	UP	NA	NA	NA	NA	NA	NA	NA	NA	NA	NA	NA
	TRINITY_DN81433_c0_g1	9.65213	6.95e-15	4.43e-13	UP	NA	NA	NA	NA	NA	NA	NA	NA	NA	NA	NA
	TRINITY_DN28348_c1_g3	9.65097	6.3e-15	4.04e-13	UP	NA	NA	NA	NA	NA	NA	NA	NA	NA	NA	NA
	TRINITY_DN32503_c0_g1	9.64902	4.14e-14	2.34e-12	UP	TRINITY_DN32503_c0_g1	TraesCS2B01G046800.1	652	693	693	1.12e-08	TraesCS2B01G046800	chr2B	23533977	23535589	Carboxymethylenebutenolidase 1
	TRINITY_DN48985_c3_g1	9.64873	2.04e-13	1.04e-11	UP	NA	NA	NA	NA	NA	NA	NA	NA	NA	NA	NA
	TRINITY_DN44949_c0_g2	9.647	4.12e-11	1.46e-09	UP	NA	NA	NA	NA	NA	NA	NA	NA	NA	NA	NA
	TRINITY_DN60971_c0_g1	9.64688	8.22e-09	2.07e-07	UP	NA	NA	NA	NA	NA	NA	NA	NA	NA	NA	NA
	TRINITY_DN16948_c0_g1	9.64565	1.13e-09	3.24e-08	UP	NA	NA	NA	NA	NA	NA	NA	NA	NA	NA	NA
	TRINITY_DN232213_c0_g1	9.64471	7.43e-15	4.72e-13	UP	TRINITY_DN232213_c0_g1	TraesCS7D01G320900.1	1407	1150	1458	7.23e-134	TraesCS7D01G320900	chr7D	411009436	411012573	Pectin lyase-like superfamily protein
	TRINITY_DN20245_c0_g4	9.64034	4.18e-13	2.02e-11	UP	TRINITY_DN20245_c0_g4	TraesCS6D01G169600.1	781	1095	1272	9e-119	TraesCS6D01G169600	chr6D	156012932	156017271	Guanine nucleotide-binding protein subunit beta-like protein
	TRINITY_DN41222_c2_g1	9.64004	5.92e-15	3.82e-13	UP	NA	NA	NA	NA	NA	NA	NA	NA	NA	NA	NA
	TRINITY_DN48976_c0_g1	9.6374	4.77e-13	2.28e-11	UP	TRINITY_DN48976_c0_g1	TraesCS7D01G447100.1	1641	1873	2010	5.1e-120	TraesCS7D01G447100	chr7D	567656619	567659834	RNA polymerase II transcription mediator
	TRINITY_DN28424_c0_g1	9.63706	3.43e-10	1.07e-08	UP	TRINITY_DN28424_c0_g1	TraesCSU01G009000.1	924	1146	1449	8.29e-103	TraesCSU01G009000	chrUn	12467595	12469287	Glycosyltransferase
	TRINITY_DN30450_c0_g1	9.63696	1.15e-14	7.04e-13	UP	TRINITY_DN30450_c0_g1	TraesCS7D01G331500.1	881	916	1203	8.67e-09	TraesCS7D01G331500	chr7D	422723150	422725215	F-box family protein
	TRINITY_DN17973_c0_g1	9.63646	2.1e-13	1.07e-11	UP	NA	NA	NA	NA	NA	NA	NA	NA	NA	NA	NA
	TRINITY_DN1191_c2_g1	9.63426	2.56e-12	1.1e-10	UP	NA	NA	NA	NA	NA	NA	NA	NA	NA	NA	NA
	TRINITY_DN21192_c0_g1	9.63258	1.43e-13	7.46e-12	UP	TRINITY_DN21192_c0_g1	TraesCSU01G029300.1	390	1488	1488	0	TraesCSU01G029300	chrUn	28199383	28204633	O-acyltransferase WSD1
	TRINITY_DN84705_c0_g4	9.63094	9.4e-15	5.87e-13	UP	TRINITY_DN84705_c0_g4	TraesCS2B01G041800.1	1321	1582	1602	6.05e-100	TraesCS2B01G041800	chr2B	18953072	18955494	Glycosyltransferase
	TRINITY_DN80700_c0_g2	9.62829	1.38e-11	5.28e-10	UP	TRINITY_DN80700_c0_g2	TraesCS2B01G059700.1	152	264	264	9.4e-39	TraesCS2B01G059700	chr2B	28921385	28921648	Rab GTPase-activating protein 1
	TRINITY_DN20298_c0_g1	9.62795	2.48e-12	1.07e-10	UP	TRINITY_DN20298_c0_g1	TraesCS7D01G542200.1	3623	4110	4110	0	TraesCS7D01G542200	chr7D	631424356	631428465	NBS-LRR disease resistance protein-like protein
	TRINITY_DN108724_c0_g1	9.62687	2.37e-11	8.75e-10	UP	NA	NA	NA	NA	NA	NA	NA	NA	NA	NA	NA
	TRINITY_DN1783_c2_g2	9.62686	6.27e-08	1.38e-06	UP	TRINITY_DN1783_c2_g2	TraesCS2D01G534200.1	168	273	273	4.07e-41	TraesCS2D01G534200	chr2D	618132569	618132841	Wound-responsive family protein
	TRINITY_DN21676_c0_g1	9.62285	1.68e-12	7.43e-11	UP	NA	NA	NA	NA	NA	NA	NA	NA	NA	NA	NA
	TRINITY_DN31312_c2_g1	9.61703	1.12e-14	6.89e-13	UP	NA	NA	NA	NA	NA	NA	NA	NA	NA	NA	NA
	TRINITY_DN73846_c0_g1	9.61676	1.22e-06	2.15e-05	UP	TRINITY_DN73846_c0_g1	TraesCS7A01G285300.1	640	869	996	2.35e-118	TraesCS7A01G285300	chr7A	328074244	328075239	Cytoplasmic trehalase
	TRINITY_DN6257_c2_g1	9.61674	1.56e-14	9.41e-13	UP	NA	NA	NA	NA	NA	NA	NA	NA	NA	NA	NA
	TRINITY_DN21870_c0_g1	9.61525	2.33e-12	1.01e-10	UP	NA	NA	NA	NA	NA	NA	NA	NA	NA	NA	NA
	TRINITY_DN17706_c0_g3	9.6138	5.34e-13	2.53e-11	UP	TRINITY_DN17706_c0_g3	TraesCS2D01G042200.1	1410	2010	3180	0	TraesCS2D01G042200	chr2D	15113231	15116657	Disease resistance protein
	TRINITY_DN37456_c0_g2	9.61346	9.82e-15	6.11e-13	UP	NA	NA	NA	NA	NA	NA	NA	NA	NA	NA	NA
	TRINITY_DN38036_c2_g1	9.61227	9.62e-15	5.99e-13	UP	TRINITY_DN38036_c2_g1	TraesCS7A01G529900.1	864	919	2424	5.19e-20	TraesCS7A01G529900	chr7A	709405013	709409966	Chaperone protein htpG family protein
	TRINITY_DN33783_c0_g1	9.61153	6.87e-12	2.76e-10	UP	NA	NA	NA	NA	NA	NA	NA	NA	NA	NA	NA
	TRINITY_DN167143_c0_g1	9.61107	1.88e-13	9.63e-12	UP	NA	NA	NA	NA	NA	NA	NA	NA	NA	NA	NA
	TRINITY_DN187121_c0_g1	9.61048	4.49e-11	1.58e-09	UP	NA	NA	NA	NA	NA	NA	NA	NA	NA	NA	NA
	TRINITY_DN13624_c1_g1	9.60937	4.83e-12	2e-10	UP	TRINITY_DN13624_c1_g1	TraesCS3A01G364100.1	54	149	651	3.55e-28	TraesCS3A01G364100	chr3A	612985290	612987282	Ras-related protein Rab-11A
	TRINITY_DN34948_c0_g1	9.60864	1.08e-13	5.7e-12	UP	TRINITY_DN34948_c0_g1	TraesCS2B01G075100.2	266	436	591	1.35e-70	TraesCS2B01G075100	chr2B	40903378	40911539	RmlC-like cupins superfamily protein
	TRINITY_DN23670_c0_g1	9.60793	2.32e-14	1.37e-12	UP	TRINITY_DN23670_c0_g1	TraesCS2A01G103700.1	408	444	444	2.85e-09	TraesCS2A01G103700	chr2A	57437363	57440348	Folylpolyglutamate synthase
	TRINITY_DN13536_c3_g1	9.60588	1.37e-13	7.19e-12	UP	TRINITY_DN13536_c3_g1	TraesCS2B01G625900.1	551	2056	2145	0	TraesCS2B01G625900	chr2B	798390724	798392868	NBS-LRR resistance-like protein
	TRINITY_DN41024_c0_g2	9.60546	1.19e-11	4.58e-10	UP	TRINITY_DN41024_c0_g2	TraesCS1A01G015400.1	113	178	672	2.73e-20	TraesCS1A01G015400	chr1A	8264346	8266168	Ras-related protein Rab-11A
	TRINITY_DN5163_c0_g2	9.6051	1.44e-14	8.67e-13	UP	NA	NA	NA	NA	NA	NA	NA	NA	NA	NA	NA
	TRINITY_DN43498_c0_g5	9.60431	4.41e-14	2.48e-12	UP	NA	NA	NA	NA	NA	NA	NA	NA	NA	NA	NA
	TRINITY_DN23708_c0_g1	9.60342	2.53e-13	1.27e-11	UP	NA	NA	NA	NA	NA	NA	NA	NA	NA	NA	NA
	TRINITY_DN25019_c0_g1	9.60225	1.14e-14	7e-13	UP	NA	NA	NA	NA	NA	NA	NA	NA	NA	NA	NA
	TRINITY_DN40873_c0_g1	9.59663	5.72e-14	3.14e-12	UP	NA	NA	NA	NA	NA	NA	NA	NA	NA	NA	NA
	TRINITY_DN38774_c1_g3	9.59623	2.01e-14	1.19e-12	UP	TRINITY_DN38774_c1_g3	TraesCS2D01G125900.1	816	918	918	2.85e-47	TraesCS2D01G125900	chr2D	73312058	73313069	Short-chain dehydrogenase/reductase
	TRINITY_DN48947_c0_g1	9.59574	3.44e-13	1.69e-11	UP	NA	NA	NA	NA	NA	NA	NA	NA	NA	NA	NA
	TRINITY_DN24511_c1_g1	9.5951	4.07e-11	1.45e-09	UP	TRINITY_DN24511_c1_g1	TraesCS2A01G568900.2	3526	3666	3885	8.76e-21	TraesCS2A01G568900	chr2A	766965230	766971285	Protein kinase family protein
	TRINITY_DN21995_c0_g1	9.59237	2.55e-08	6.01e-07	UP	TRINITY_DN21995_c0_g1	TraesCS7D01G438600.1	616	837	1587	6.29e-114	TraesCS7D01G438600	chr7D	557835765	557838778	Cytochrome P450
	TRINITY_DN9333_c3_g1	9.59205	8.22e-14	4.43e-12	UP	TRINITY_DN9333_c3_g1	TraesCS7D01G546100.1	1912	2381	4470	0	TraesCS7D01G546100	chr7D	633029652	633041573	Disease resistance protein (NBS-LRR class) family
	TRINITY_DN41621_c0_g1	9.59116	2.81e-07	5.57e-06	UP	NA	NA	NA	NA	NA	NA	NA	NA	NA	NA	NA
	TRINITY_DN25276_c1_g1	9.58806	1.46e-14	8.81e-13	UP	NA	NA	NA	NA	NA	NA	NA	NA	NA	NA	NA
	TRINITY_DN36792_c0_g2	9.58801	4.68e-13	2.24e-11	UP	TRINITY_DN36792_c0_g2	TraesCS7D01G065700.1	1	270	270	1.71e-133	TraesCS7D01G065700	chr7D	36451433	36452078	Avr9/Cf-9 rapidly elicited protein
	TRINITY_DN20091_c0_g2	9.58398	2.45e-13	1.23e-11	UP	NA	NA	NA	NA	NA	NA	NA	NA	NA	NA	NA
	TRINITY_DN16856_c1_g2	9.57868	6.58e-13	3.08e-11	UP	NA	NA	NA	NA	NA	NA	NA	NA	NA	NA	NA
	TRINITY_DN26136_c0_g1	9.57862	1.83e-14	1.09e-12	UP	TRINITY_DN26136_c0_g1	TraesCS3A01G343200.1	68	167	519	1.94e-39	TraesCS3A01G343200	chr3A	590363970	590368698	BSD domain-containing protein
	TRINITY_DN42956_c0_g1	9.57816	3.3e-14	1.9e-12	UP	TRINITY_DN42956_c0_g1	TraesCSU01G171300.2	1	36	1434	3.03e-09	TraesCSU01G171300	chrUn	252518645	252526758	receptor kinase 1
	TRINITY_DN41926_c0_g1	9.57743	2.43e-13	1.23e-11	UP	TRINITY_DN41926_c0_g1	TraesCS2A01G023400.1	2021	2314	2943	3.83e-142	TraesCS2A01G023400	chr2A	11372891	11379765	Disease resistance protein (NBS-LRR class) family
	TRINITY_DN35677_c0_g1	9.57285	1.06e-08	2.62e-07	UP	TRINITY_DN35677_c0_g1	TraesCS1D01G037400.1	2281	2495	2892	3e-77	TraesCS1D01G037400	chr1D	17648907	17652424	Disease resistance protein RPM1
	TRINITY_DN59616_c0_g1	9.56925	7.81e-14	4.22e-12	UP	TRINITY_DN59616_c0_g1	TraesCS2A01G510900.1	1044	1149	1392	5.01e-41	TraesCS2A01G510900	chr2A	735775549	735779051	Small RNA degrading nuclease
	TRINITY_DN32667_c0_g1	9.56912	3.03e-14	1.76e-12	UP	NA	NA	NA	NA	NA	NA	NA	NA	NA	NA	NA
	TRINITY_DN27576_c0_g3	9.56759	3.41e-14	1.96e-12	UP	TRINITY_DN27576_c0_g3	TraesCS7D01G159100.1	1	588	588	0	TraesCS7D01G159100	chr7D	108290392	108293520	Chorismate synthase
	TRINITY_DN12687_c1_g2	9.56512	4.88e-14	2.71e-12	UP	NA	NA	NA	NA	NA	NA	NA	NA	NA	NA	NA
	TRINITY_DN16614_c0_g2	9.56299	6.18e-13	2.91e-11	UP	NA	NA	NA	NA	NA	NA	NA	NA	NA	NA	NA
	TRINITY_DN46403_c0_g2	9.56174	4.41e-13	2.13e-11	UP	NA	NA	NA	NA	NA	NA	NA	NA	NA	NA	NA
	TRINITY_DN47263_c0_g1	9.55794	2.03e-13	1.04e-11	UP	TRINITY_DN47263_c0_g1	TraesCS5A01G003900.1	397	534	534	7.39e-67	TraesCS5A01G003900	chr5A	2727321	2728411	Thioesterase family protein
	TRINITY_DN861_c3_g1	9.55537	2.45e-12	1.06e-10	UP	NA	NA	NA	NA	NA	NA	NA	NA	NA	NA	NA
	TRINITY_DN51837_c1_g1	9.55508	6.01e-13	2.84e-11	UP	TRINITY_DN51837_c1_g1	TraesCS3B01G426100.1	2101	1824	2151	2.81e-138	TraesCS3B01G426100	chr3B	664111915	664115510	Monooxygenase
	TRINITY_DN64901_c0_g1	9.5546	3.85e-14	2.18e-12	UP	NA	NA	NA	NA	NA	NA	NA	NA	NA	NA	NA
	TRINITY_DN74711_c0_g2	9.55203	1.18e-11	4.56e-10	UP	TRINITY_DN74711_c0_g2	TraesCS5A01G547600.1	223	28	570	5.02e-25	TraesCS5A01G547600	chr5A	701907344	701907913	B3 domain-containing protein REM13
	TRINITY_DN27345_c0_g1	9.54969	1e-12	4.58e-11	UP	TRINITY_DN27345_c0_g1	TraesCS3B01G500700.1	1505	1620	1620	3.07e-48	TraesCS3B01G500700	chr3B	744847150	744849092	F-box family protein
	TRINITY_DN72583_c0_g1	9.54969	1e-12	4.58e-11	UP	TRINITY_DN72583_c0_g1	TraesCS1B01G408600.1	420	628	1503	9.9e-107	TraesCS1B01G408600	chr1B	636262266	636264341	Serine/threonine protein phosphatase 2A regulatory subunit B
	TRINITY_DN36322_c0_g1	9.54931	7.89e-14	4.26e-12	UP	NA	NA	NA	NA	NA	NA	NA	NA	NA	NA	NA
	TRINITY_DN37349_c0_g1	9.54905	1.01e-10	3.38e-09	UP	TRINITY_DN37349_c0_g1	TraesCS6D01G169600.2	1021	1179	1179	3.66e-67	TraesCS6D01G169600	chr6D	156012932	156017271	Guanine nucleotide-binding protein subunit beta-like protein
	TRINITY_DN23159_c0_g2	9.54774	1.45e-10	4.75e-09	UP	TRINITY_DN23159_c0_g2	TraesCS2A01G030000.1	3256	3285	3285	4.31e-07	TraesCS2A01G030000	chr2A	13811892	13815254	NBS-LRR-like resistance protein
	TRINITY_DN49323_c0_g1	9.54203	2e-13	1.02e-11	UP	NA	NA	NA	NA	NA	NA	NA	NA	NA	NA	NA
	TRINITY_DN32399_c0_g1	9.53811	6.69e-12	2.7e-10	UP	NA	NA	NA	NA	NA	NA	NA	NA	NA	NA	NA
	TRINITY_DN35875_c0_g2	9.53791	3.45e-14	1.98e-12	UP	NA	NA	NA	NA	NA	NA	NA	NA	NA	NA	NA
	TRINITY_DN135498_c0_g1	9.53753	2.29e-13	1.16e-11	UP	TRINITY_DN135498_c0_g1	TraesCS4B01G394700.1	1	321	1077	1.19e-148	TraesCS4B01G394700	chr4B	668873284	668874360	2-oxoglutarate (2OG) and Fe(II)-dependent oxygenase superfamily protein, putative
	TRINITY_DN72090_c0_g1	9.53742	4.01e-14	2.27e-12	UP	TRINITY_DN72090_c0_g1	TraesCS6B01G187700.4	693	799	819	1.7e-32	TraesCS6B01G187700	chr6B	215140534	215149007	NADPH--cytochrome P450 reductase
	TRINITY_DN82260_c1_g1	9.53626	1.72e-12	7.62e-11	UP	NA	NA	NA	NA	NA	NA	NA	NA	NA	NA	NA
	TRINITY_DN24774_c0_g1	9.53432	1.31e-10	4.3e-09	UP	NA	NA	NA	NA	NA	NA	NA	NA	NA	NA	NA
	TRINITY_DN1890_c1_g2	9.53414	4.39e-14	2.47e-12	UP	TRINITY_DN1890_c1_g2	TraesCS2B01G401600.2	569	783	783	1.13e-109	TraesCS2B01G401600	chr2B	570065836	570089570	Beta-glucosidase, putative
	TRINITY_DN24032_c0_g1	9.53365	3.51e-14	2e-12	UP	TRINITY_DN24032_c0_g1	TraesCS7B01G479300.1	3343	3676	3705	1.44e-95	TraesCS7B01G479300	chr7B	733860344	733864177	NBS-LRR disease resistance protein-like protein
	TRINITY_DN26373_c0_g3	9.5308	3.11e-12	1.32e-10	UP	TRINITY_DN26373_c0_g3	TraesCS7D01G466800.1	564	802	1242	2.42e-123	TraesCS7D01G466800	chr7D	580481332	580484484	Ureide permease-like protein
	TRINITY_DN18959_c0_g1	9.53072	3.35e-09	8.92e-08	UP	TRINITY_DN18959_c0_g1	TraesCS6A01G001200.1	315	534	900	1.83e-74	TraesCS6A01G001200	chr6A	734214	735473	Zinc finger protein 512B family
	TRINITY_DN28490_c2_g1	9.52638	6.66e-14	3.63e-12	UP	TRINITY_DN28490_c2_g1	TraesCS2A01G360000.1	474	357	480	8.51e-33	TraesCS2A01G360000	chr2A	603855754	603856938	Cysteine-rich receptor-like protein kinase 41
	TRINITY_DN28163_c0_g3	9.52514	3.7e-11	1.33e-09	UP	NA	NA	NA	NA	NA	NA	NA	NA	NA	NA	NA
	TRINITY_DN11186_c1_g1	9.52211	1.13e-13	5.97e-12	UP	NA	NA	NA	NA	NA	NA	NA	NA	NA	NA	NA
	TRINITY_DN18348_c0_g1	9.5214	2.19e-12	9.53e-11	UP	NA	NA	NA	NA	NA	NA	NA	NA	NA	NA	NA
	TRINITY_DN63427_c0_g1	9.52084	9.46e-14	5.05e-12	UP	TRINITY_DN63427_c0_g1	TraesCS2D01G012900.2	479	737	3159	9.98e-108	TraesCS2D01G012900	chr2D	6424985	6431437	Protein transport Sec24-like protein
	TRINITY_DN16546_c1_g1	9.52054	5.14e-14	2.84e-12	UP	TRINITY_DN16546_c1_g1	TraesCS3B01G030500.1	1648	1486	1926	3.55e-65	TraesCS3B01G030500	chr3B	13961475	13964705	Receptor-like kinase
	TRINITY_DN76572_c0_g1	9.51675	3.75e-10	1.16e-08	UP	TRINITY_DN76572_c0_g1	TraesCS2D01G507700.1	491	717	867	1.07e-116	TraesCS2D01G507700	chr2D	601206498	601211309	Nuclease S1
	TRINITY_DN85512_c0_g1	9.51544	9.5e-14	5.07e-12	UP	TRINITY_DN85512_c0_g1	TraesCS2A01G291200.1	94	331	819	5.36e-64	TraesCS2A01G291200	chr2A	501849546	501853079	Mitochondrial import inner membrane translocase subunit TIM22
	TRINITY_DN22330_c0_g1	9.51446	5.59e-14	3.07e-12	UP	NA	NA	NA	NA	NA	NA	NA	NA	NA	NA	NA
	TRINITY_DN24727_c0_g1	9.51446	5.59e-14	3.07e-12	UP	NA	NA	NA	NA	NA	NA	NA	NA	NA	NA	NA
	TRINITY_DN1669_c1_g1	9.51435	1.82e-11	6.83e-10	UP	TRINITY_DN1669_c1_g1	TraesCS6A01G403800.1	7	203	1221	6.07e-79	TraesCS6A01G403800	chr6A	610929180	610930400	Divinyl reductase
	TRINITY_DN92812_c0_g1	9.50985	7.97e-14	4.3e-12	UP	NA	NA	NA	NA	NA	NA	NA	NA	NA	NA	NA
	TRINITY_DN35805_c0_g2	9.509	3.09e-13	1.53e-11	UP	NA	NA	NA	NA	NA	NA	NA	NA	NA	NA	NA
	TRINITY_DN55941_c0_g2	9.50801	6.96e-13	3.25e-11	UP	TRINITY_DN55941_c0_g2	TraesCS5B01G233700.1	1	270	1188	2.63e-95	TraesCS5B01G233700	chr5B	411799192	411802764	Hexosyltransferase
	TRINITY_DN17860_c0_g1	9.50723	1.63e-07	3.35e-06	UP	NA	NA	NA	NA	NA	NA	NA	NA	NA	NA	NA
	TRINITY_DN81932_c1_g2	9.50427	3.6e-11	1.3e-09	UP	TRINITY_DN81932_c1_g2	TraesCS3D01G487500.1	1189	1092	1254	5.55e-28	TraesCS3D01G487500	chr3D	582832099	582833380	U3 small nucleolar RNA-associated protein 18-like protein
	TRINITY_DN15549_c0_g1	9.5033	5.96e-11	2.07e-09	UP	TRINITY_DN15549_c0_g1	TraesCS7A01G052300.1	1	318	318	1.07e-131	TraesCS7A01G052300	chr7A	25338468	25338896	Phosphoenolpyruvate carboxylase
	TRINITY_DN6728_c1_g2	9.50175	3.07e-09	8.22e-08	UP	TRINITY_DN6728_c1_g2	TraesCS2A01G184500.1	565	972	972	5.13e-135	TraesCS2A01G184500	chr2A	144850046	144852614	Receptor-like protein kinase
	TRINITY_DN63596_c0_g2	9.50171	1.06e-08	2.61e-07	UP	NA	NA	NA	NA	NA	NA	NA	NA	NA	NA	NA
	TRINITY_DN15158_c0_g1	9.50067	7.71e-14	4.18e-12	UP	TRINITY_DN15158_c0_g1	TraesCS7D01G518000.1	631	2021	2079	0	TraesCS7D01G518000	chr7D	616604100	616606178	transmembrane protein, putative (DUF594)
	TRINITY_DN24872_c0_g1	9.49817	7.2e-13	3.36e-11	UP	NA	NA	NA	NA	NA	NA	NA	NA	NA	NA	NA
	TRINITY_DN47901_c0_g1	9.49809	6.79e-14	3.7e-12	UP	TRINITY_DN47901_c0_g1	TraesCS2A01G030000.1	2876	3171	3285	6.55e-130	TraesCS2A01G030000	chr2A	13811892	13815254	NBS-LRR-like resistance protein
	TRINITY_DN35165_c0_g1	9.4976	1.25e-13	6.6e-12	UP	TRINITY_DN35165_c0_g1	TraesCS1A01G285400.1	150	357	1581	1.98e-104	TraesCS1A01G285400	chr1A	482768678	482771403	GTP cyclohydrolase II/3,4-dihydroxy-2-butanone 4-phosphate synthase
	TRINITY_DN55448_c0_g1	9.49686	9.75e-13	4.47e-11	UP	TRINITY_DN55448_c0_g1	TraesCS2A01G541500.2	60	130	636	2.16e-14	TraesCS2A01G541500	chr2A	752871993	752875082	Triacylglycerol lipase 2, putative
	TRINITY_DN16943_c1_g1	9.4968	6.6e-14	3.6e-12	UP	TRINITY_DN16943_c1_g1	TraesCS7A01G564900.1	2073	2329	3468	2.59e-133	TraesCS7A01G564900	chr7A	734354179	734364510	Receptor-like protein kinase
	TRINITY_DN24031_c0_g1	9.49491	3.9e-10	1.2e-08	UP	TRINITY_DN24031_c0_g1	TraesCS4A01G437200.1	475	675	2289	1.25e-95	TraesCS4A01G437200	chr4A	707040590	707048030	Protein ENHANCED DISEASE RESISTANCE 2-like
	TRINITY_DN50458_c0_g1	9.49491	3.9e-10	1.2e-08	UP	TRINITY_DN50458_c0_g1	TraesCS7D01G036700.1	2590	2961	3300	3.81e-128	TraesCS7D01G036700	chr7D	18691439	18695264	Receptor-like protein kinase
	TRINITY_DN47690_c0_g1	9.49286	8.86e-13	4.09e-11	UP	TRINITY_DN47690_c0_g1	TraesCS7A01G008500.1	1389	1655	2766	1.63e-130	TraesCS7A01G008500	chr7A	3840621	3844152	NBS-LRR-like resistance protein
	TRINITY_DN15444_c1_g1	9.48771	7e-11	2.41e-09	UP	NA	NA	NA	NA	NA	NA	NA	NA	NA	NA	NA
	TRINITY_DN236758_c0_g1	9.48693	8.34e-12	3.3e-10	UP	NA	NA	NA	NA	NA	NA	NA	NA	NA	NA	NA
	TRINITY_DN38782_c0_g1	9.48544	9.86e-14	5.26e-12	UP	NA	NA	NA	NA	NA	NA	NA	NA	NA	NA	NA
	TRINITY_DN86047_c4_g1	9.48414	9.17e-14	4.9e-12	UP	TRINITY_DN86047_c4_g1	TraesCS2D01G000200.1	925	954	954	3.89e-07	TraesCS2D01G000200	chr2D	39675	40812	Reductase 1
	TRINITY_DN10697_c0_g3	9.48372	7.33e-09	1.86e-07	UP	TRINITY_DN10697_c0_g3	TraesCS7B01G479300.1	2198	2496	3705	7.11e-66	TraesCS7B01G479300	chr7B	733860344	733864177	NBS-LRR disease resistance protein-like protein
	TRINITY_DN34476_c0_g1	9.4829	3.42e-12	1.44e-10	UP	TRINITY_DN34476_c0_g1	TraesCS5D01G204900.1	1362	1494	1503	3.31e-40	TraesCS5D01G204900	chr5D	310496797	310501360	Glycosyltransferase
	TRINITY_DN108369_c0_g1	9.48284	8.72e-14	4.68e-12	UP	NA	NA	NA	NA	NA	NA	NA	NA	NA	NA	NA
	TRINITY_DN1316_c2_g1	9.48156	2.53e-12	1.09e-10	UP	TRINITY_DN1316_c2_g1	TraesCS7D01G545800.1	2831	3019	3954	1.4e-95	TraesCS7D01G545800	chr7D	632801275	632820118	receptor kinase 1
	TRINITY_DN26879_c0_g1	9.48121	3.1e-13	1.53e-11	UP	TRINITY_DN26879_c0_g1	TraesCS1D01G035300.1	1	90	1353	1.67e-40	TraesCS1D01G035300	chr1D	16379080	16381260	Ankyrin repeat family protein
	TRINITY_DN13228_c1_g1	9.4759	9.62e-13	4.42e-11	UP	NA	NA	NA	NA	NA	NA	NA	NA	NA	NA	NA
	TRINITY_DN22870_c2_g1	9.47531	1.95e-13	9.99e-12	UP	NA	NA	NA	NA	NA	NA	NA	NA	NA	NA	NA
	TRINITY_DN256227_c0_g1	9.47457	1.3e-12	5.85e-11	UP	NA	NA	NA	NA	NA	NA	NA	NA	NA	NA	NA
	TRINITY_DN13847_c0_g3	9.47449	9.69e-14	5.17e-12	UP	TRINITY_DN13847_c0_g3	TraesCS3B01G359300.1	105	1143	1143	0	TraesCS3B01G359300	chr3B	571747969	571749111	Arginine/serine-rich splicing factor, putative
	TRINITY_DN32076_c0_g1	9.47395	1.53e-08	3.7e-07	UP	NA	NA	NA	NA	NA	NA	NA	NA	NA	NA	NA
	TRINITY_DN43582_c0_g1	9.47292	1.46e-11	5.57e-10	UP	TRINITY_DN43582_c0_g1	TraesCS3D01G513400.1	1696	2208	2208	3.89e-122	TraesCS3D01G513400	chr3D	597478145	597482308	NBS-LRR-like resistance protein
	TRINITY_DN484_c2_g1	9.47268	1.45e-13	7.57e-12	UP	NA	NA	NA	NA	NA	NA	NA	NA	NA	NA	NA
	TRINITY_DN102117_c0_g1	9.47184	1.83e-12	8.03e-11	UP	NA	NA	NA	NA	NA	NA	NA	NA	NA	NA	NA
	TRINITY_DN19531_c0_g1	9.47108	9.01e-32	7.17e-29	UP	TRINITY_DN19531_c0_g1	TraesCS7B01G410100.1	1	1323	1323	0	TraesCS7B01G410100	chr7B	679359611	679361223	Agmatine coumaroyltransferase-2
	TRINITY_DN73437_c2_g1	9.46885	9.59e-13	4.41e-11	UP	NA	NA	NA	NA	NA	NA	NA	NA	NA	NA	NA
	TRINITY_DN24489_c0_g1	9.46824	2.39e-13	1.21e-11	UP	TRINITY_DN24489_c0_g1	TraesCS7D01G507300.1	1	231	1476	2.11e-118	TraesCS7D01G507300	chr7D	611590926	611592401	Amino acid transporter-like protein
	TRINITY_DN20560_c0_g4	9.46782	7.02e-12	2.82e-10	UP	NA	NA	NA	NA	NA	NA	NA	NA	NA	NA	NA
	TRINITY_DN35890_c0_g3	9.46691	6.86e-09	1.75e-07	UP	NA	NA	NA	NA	NA	NA	NA	NA	NA	NA	NA
	TRINITY_DN17593_c0_g3	9.46444	5.25e-13	2.49e-11	UP	TRINITY_DN17593_c0_g3	TraesCS6A01G405200.1	134	216	1092	3.39e-28	TraesCS6A01G405200	chr6A	611328563	611330608	O-methyltransferase
	TRINITY_DN45246_c0_g4	9.4638	4.14e-13	2e-11	UP	NA	NA	NA	NA	NA	NA	NA	NA	NA	NA	NA
	TRINITY_DN78636_c0_g3	9.46295	1.38e-13	7.24e-12	UP	TRINITY_DN78636_c0_g3	TraesCS5B01G482300.1	258	522	522	4.88e-134	TraesCS5B01G482300	chr5B	654917562	654918172	glutamate receptor 2.3
	TRINITY_DN44133_c0_g2	9.46259	9.38e-07	1.69e-05	UP	NA	NA	NA	NA	NA	NA	NA	NA	NA	NA	NA
	TRINITY_DN106456_c0_g2	9.46125	1.05e-08	2.61e-07	UP	TRINITY_DN106456_c0_g2	TraesCS7D01G550900.1	2290	2513	3315	4.91e-115	TraesCS7D01G550900	chr7D	634691966	634696889	DUF789 family protein
	TRINITY_DN4444_c3_g3	9.46114	2.94e-13	1.46e-11	UP	NA	NA	NA	NA	NA	NA	NA	NA	NA	NA	NA
	TRINITY_DN44727_c0_g4	9.46	3.33e-13	1.64e-11	UP	TRINITY_DN44727_c0_g4	TraesCS3A01G200500.1	562	493	564	4.4e-27	TraesCS3A01G200500	chr3A	331738130	331739014	pumilio 12
	TRINITY_DN65131_c0_g1	9.45832	5.83e-10	1.75e-08	UP	TRINITY_DN65131_c0_g1	TraesCS7A01G070500.1	198	261	261	6.04e-26	TraesCS7A01G070500	chr7A	36309525	36310301	Avr9/Cf-9 rapidly elicited protein
	TRINITY_DN76212_c0_g1	9.45715	1.84e-13	9.46e-12	UP	TRINITY_DN76212_c0_g1	TraesCS7B01G352200.1	1334	1546	1872	1.32e-100	TraesCS7B01G352200	chr7B	608721097	608725473	SWAP (Suppressor-of-White-APricot)/surp domain-containing protein
	TRINITY_DN16520_c0_g1	9.45523	2.8e-11	1.02e-09	UP	NA	NA	NA	NA	NA	NA	NA	NA	NA	NA	NA
	TRINITY_DN22749_c0_g2	9.45266	3.03e-13	1.5e-11	UP	TRINITY_DN22749_c0_g2	TraesCS7D01G546600.1	709	1016	2115	1.99e-110	TraesCS7D01G546600	chr7D	633250908	633253449	Tetratricopeptide repeat-like superfamily protein, putative isoform 1
	TRINITY_DN32149_c1_g1	9.45051	1.38e-13	7.24e-12	UP	NA	NA	NA	NA	NA	NA	NA	NA	NA	NA	NA
	TRINITY_DN12999_c0_g3	9.45025	2.47e-11	9.07e-10	UP	TRINITY_DN12999_c0_g3	TraesCS6D01G041500.1	68	329	330	2.96e-98	TraesCS6D01G041500	chr6D	17018645	17019855	Cytochrome P450
	TRINITY_DN1811_c2_g1	9.44865	1.95e-13	9.99e-12	UP	TRINITY_DN1811_c2_g1	TraesCS7D01G443500.1	547	597	597	6.43e-19	TraesCS7D01G443500	chr7D	563662947	563666157	Carbonic anhydrase
	TRINITY_DN21445_c0_g2	9.44827	1.79e-10	5.79e-09	UP	NA	NA	NA	NA	NA	NA	NA	NA	NA	NA	NA
	TRINITY_DN29970_c0_g1	9.44703	2.74e-13	1.37e-11	UP	NA	NA	NA	NA	NA	NA	NA	NA	NA	NA	NA
	TRINITY_DN15535_c2_g1	9.44598	1.62e-13	8.37e-12	UP	TRINITY_DN15535_c2_g1	TraesCS7D01G542100.1	1	154	1638	2.01e-52	TraesCS7D01G542100	chr7D	631395499	631397136	NBS-LRR disease resistance protein-like protein
	TRINITY_DN26687_c0_g3	9.44248	1.72e-38	3.32e-35	UP	NA	NA	NA	NA	NA	NA	NA	NA	NA	NA	NA
	TRINITY_DN2500_c0_g3	9.44201	3.18e-12	1.34e-10	UP	TRINITY_DN2500_c0_g3	TraesCS1D01G361600.1	51	125	243	3.64e-25	TraesCS1D01G361600	chr1D	444341796	444343732	ABC transporter A family protein
	TRINITY_DN33305_c0_g1	9.43982	2.87e-13	1.42e-11	UP	NA	NA	NA	NA	NA	NA	NA	NA	NA	NA	NA
	TRINITY_DN1430_c0_g2	9.43647	1.36e-12	6.13e-11	UP	NA	NA	NA	NA	NA	NA	NA	NA	NA	NA	NA
	TRINITY_DN6708_c4_g2	9.43576	5.63e-13	2.66e-11	UP	NA	NA	NA	NA	NA	NA	NA	NA	NA	NA	NA
	TRINITY_DN29306_c0_g3	9.43479	3.14e-12	1.33e-10	UP	NA	NA	NA	NA	NA	NA	NA	NA	NA	NA	NA
	TRINITY_DN67940_c0_g1	9.43308	2.27e-11	8.42e-10	UP	NA	NA	NA	NA	NA	NA	NA	NA	NA	NA	NA
	TRINITY_DN57768_c0_g1	9.43114	2.22e-09	6.09e-08	UP	NA	NA	NA	NA	NA	NA	NA	NA	NA	NA	NA
	TRINITY_DN4334_c0_g1	9.43064	8.42e-12	3.33e-10	UP	NA	NA	NA	NA	NA	NA	NA	NA	NA	NA	NA
	TRINITY_DN243779_c0_g1	9.43005	7.7e-11	2.63e-09	UP	NA	NA	NA	NA	NA	NA	NA	NA	NA	NA	NA
	TRINITY_DN20334_c0_g1	9.42784	1.35e-12	6.09e-11	UP	TRINITY_DN20334_c0_g1	TraesCS4B01G009800.1	1092	1152	1152	2.76e-22	TraesCS4B01G009800	chr4B	6140156	6141307	Haloacid dehalogenase-like hydrolase superfamily protein
	TRINITY_DN162500_c0_g1	9.42558	2.97e-13	1.47e-11	UP	NA	NA	NA	NA	NA	NA	NA	NA	NA	NA	NA
	TRINITY_DN53748_c0_g1	9.42341	2.11e-13	1.07e-11	UP	NA	NA	NA	NA	NA	NA	NA	NA	NA	NA	NA
	TRINITY_DN24356_c0_g1	9.42055	1.63e-12	7.23e-11	UP	TRINITY_DN24356_c0_g1	TraesCS7D01G416500.1	584	890	1407	5.05e-161	TraesCS7D01G416500	chr7D	535550731	535553145	FBD-associated F-box protein
	TRINITY_DN29004_c0_g2	9.41853	4.02e-11	1.43e-09	UP	NA	NA	NA	NA	NA	NA	NA	NA	NA	NA	NA
	TRINITY_DN20330_c0_g2	9.41817	1.03e-08	2.56e-07	UP	NA	NA	NA	NA	NA	NA	NA	NA	NA	NA	NA
	TRINITY_DN22707_c0_g2	9.41111	9.64e-13	4.43e-11	UP	NA	NA	NA	NA	NA	NA	NA	NA	NA	NA	NA
	TRINITY_DN162470_c0_g1	9.41043	1.34e-12	6.04e-11	UP	NA	NA	NA	NA	NA	NA	NA	NA	NA	NA	NA
	TRINITY_DN215147_c0_g1	9.41008	2.56e-13	1.28e-11	UP	NA	NA	NA	NA	NA	NA	NA	NA	NA	NA	NA
	TRINITY_DN35819_c3_g1	9.40816	3.37e-13	1.66e-11	UP	NA	NA	NA	NA	NA	NA	NA	NA	NA	NA	NA
	TRINITY_DN62139_c0_g3	9.40734	2.72e-13	1.36e-11	UP	TRINITY_DN62139_c0_g3	TraesCS6D01G036400.1	697	1453	1560	0	TraesCS6D01G036400	chr6D	14934262	14936082	disease resistance family protein / LRR family protein
	TRINITY_DN26663_c0_g2	9.40511	6.24e-10	1.86e-08	UP	NA	NA	NA	NA	NA	NA	NA	NA	NA	NA	NA
	TRINITY_DN48675_c0_g2	9.40303	3.33e-11	1.2e-09	UP	NA	NA	NA	NA	NA	NA	NA	NA	NA	NA	NA
	TRINITY_DN41088_c0_g4	9.40204	7.21e-08	1.57e-06	UP	NA	NA	NA	NA	NA	NA	NA	NA	NA	NA	NA
	TRINITY_DN18787_c0_g2	9.39814	2.87e-12	1.23e-10	UP	TRINITY_DN18787_c0_g2	TraesCS1A01G123800.1	3	87	285	4.47e-29	TraesCS1A01G123800	chr1A	144559153	144559437	Protein kinase
	TRINITY_DN96119_c0_g1	9.39799	3.36e-13	1.65e-11	UP	NA	NA	NA	NA	NA	NA	NA	NA	NA	NA	NA
	TRINITY_DN6924_c1_g2	9.39608	6.01e-13	2.84e-11	UP	NA	NA	NA	NA	NA	NA	NA	NA	NA	NA	NA
	TRINITY_DN59912_c1_g1	9.39603	2.37e-07	4.76e-06	UP	TRINITY_DN59912_c1_g1	TraesCS7D01G442200.1	784	999	999	2.81e-110	TraesCS7D01G442200	chr7D	561700107	561704946	Peroxidase
	TRINITY_DN22130_c0_g1	9.39583	2.02e-10	6.47e-09	UP	TRINITY_DN22130_c0_g1	TraesCS7A01G455300.1	1	61	1587	8.76e-19	TraesCS7A01G455300	chr7A	651197815	651200708	Cytochrome P450
	TRINITY_DN67215_c0_g3	9.3903	1.1e-09	3.16e-08	UP	TRINITY_DN67215_c0_g3	TraesCS2D01G475300.1	301	569	2871	2.7e-111	TraesCS2D01G475300	chr2D	577790137	577798635	Receptor-kinase, putative
	TRINITY_DN17580_c0_g4	9.38861	7.38e-13	3.43e-11	UP	TRINITY_DN17580_c0_g4	TraesCS3B01G604600.1	962	1062	1110	1.41e-28	TraesCS3B01G604600	chr3B	823294611	823305404	Disease resistance protein (NBS-LRR class) family
	TRINITY_DN36163_c0_g1	9.38817	3.02e-11	1.1e-09	UP	TRINITY_DN36163_c0_g1	TraesCS3B01G107700.1	97	204	216	3.43e-30	TraesCS3B01G107700	chr3B	73032131	73033340	Signal recognition particle 54 kDa protein
	TRINITY_DN89016_c0_g1	9.38498	3.76e-13	1.84e-11	UP	TRINITY_DN89016_c0_g1	TraesCS7A01G358500.1	1108	846	4215	5.75e-130	TraesCS7A01G358500	chr7A	531184143	531197033	Cell division cycle and apoptosis regulator protein 1
	TRINITY_DN95191_c0_g3	9.3836	3.89e-13	1.9e-11	UP	TRINITY_DN95191_c0_g3	TraesCS7D01G274700.1	23	103	942	8.73e-19	TraesCS7D01G274700	chr7D	264319784	264320725	DUF241 domain protein (DUF241)
	TRINITY_DN203152_c0_g1	9.38282	1.25e-06	2.19e-05	UP	NA	NA	NA	NA	NA	NA	NA	NA	NA	NA	NA
	TRINITY_DN83041_c3_g1	9.38081	4.49e-13	2.16e-11	UP	TRINITY_DN83041_c3_g1	TraesCS2A01G475500.1	1587	1427	1587	3.18e-78	TraesCS2A01G475500	chr2A	715963558	715967265	GrpE protein homolog
	TRINITY_DN1671_c5_g1	9.37422	3.3e-11	1.19e-09	UP	NA	NA	NA	NA	NA	NA	NA	NA	NA	NA	NA
	TRINITY_DN41999_c3_g1	9.37326	4.89e-13	2.33e-11	UP	TRINITY_DN41999_c3_g1	TraesCS2A01G485700.2	17	74	2250	2.58e-07	TraesCS2A01G485700	chr2A	721104305	721107040	Serine/threonine-protein kinase
	TRINITY_DN77082_c0_g1	9.37282	5.2e-12	2.14e-10	UP	TRINITY_DN77082_c0_g1	TraesCS7B01G479300.1	305	680	3705	6.17e-171	TraesCS7B01G479300	chr7B	733860344	733864177	NBS-LRR disease resistance protein-like protein
	TRINITY_DN46890_c1_g2	9.37106	1.11e-10	3.68e-09	UP	NA	NA	NA	NA	NA	NA	NA	NA	NA	NA	NA
	TRINITY_DN5509_c3_g1	9.37045	6.09e-13	2.87e-11	UP	TRINITY_DN5509_c3_g1	TraesCS4B01G190000.1	75	149	579	5.14e-16	TraesCS4B01G190000	chr4B	412777602	412779212	40S ribosomal protein S7
	TRINITY_DN72381_c3_g1	9.37025	2.61e-12	1.12e-10	UP	NA	NA	NA	NA	NA	NA	NA	NA	NA	NA	NA
	TRINITY_DN23932_c2_g1	9.36623	1.15e-08	2.83e-07	UP	NA	NA	NA	NA	NA	NA	NA	NA	NA	NA	NA
	TRINITY_DN15259_c2_g1	9.36313	9.77e-13	4.48e-11	UP	TRINITY_DN15259_c2_g1	TraesCS7B01G165900.1	164	235	600	1.96e-21	TraesCS7B01G165900	chr7B	228811538	228812597	RING-H2 finger protein ATL3F
	TRINITY_DN43102_c0_g1	9.36265	5.7e-11	1.99e-09	UP	TRINITY_DN43102_c0_g1	TraesCS6B01G010100.1	321	542	702	6.29e-114	TraesCS6B01G010100	chr6B	6194191	6195294	Pathogen-related protein
	TRINITY_DN56574_c0_g1	9.36121	2.61e-12	1.12e-10	UP	TRINITY_DN56574_c0_g1	TraesCS2A01G103700.1	189	303	444	1.27e-47	TraesCS2A01G103700	chr2A	57437363	57440348	Folylpolyglutamate synthase
	TRINITY_DN28037_c0_g5	9.36053	7.65e-11	2.61e-09	UP	TRINITY_DN28037_c0_g5	TraesCS5D01G379200.1	417	139	432	1.66e-126	TraesCS5D01G379200	chr5D	450373602	450374449	Dehydrin
	TRINITY_DN62481_c0_g1	9.36051	2.76e-12	1.18e-10	UP	NA	NA	NA	NA	NA	NA	NA	NA	NA	NA	NA
	TRINITY_DN22802_c0_g1	9.35887	7.03e-13	3.28e-11	UP	NA	NA	NA	NA	NA	NA	NA	NA	NA	NA	NA
	TRINITY_DN43624_c0_g1	9.35867	4.34e-07	8.3e-06	UP	TRINITY_DN43624_c0_g1	TraesCS1D01G024400.1	41	292	3978	7.19e-119	TraesCS1D01G024400	chr1D	10257044	10268559	ABC transporter ATP-binding protein
	TRINITY_DN7164_c0_g4	9.35859	1.12e-12	5.08e-11	UP	TRINITY_DN7164_c0_g4	TraesCS7D01G349700.1	354	1	654	0	TraesCS7D01G349700	chr7D	449547928	449548899	RING/U-box superfamily protein
	TRINITY_DN48951_c0_g1	9.35835	1.77e-12	7.78e-11	UP	NA	NA	NA	NA	NA	NA	NA	NA	NA	NA	NA
	TRINITY_DN33662_c0_g1	9.35604	6.06e-13	2.86e-11	UP	TRINITY_DN33662_c0_g1	TraesCS1A01G029100.1	1809	2065	2859	1.25e-106	TraesCS1A01G029100	chr1A	13663300	13667800	Disease resistance protein (TIR-NBS-LRR class) family
	TRINITY_DN17544_c0_g1	9.35503	5.58e-11	1.94e-09	UP	NA	NA	NA	NA	NA	NA	NA	NA	NA	NA	NA
	TRINITY_DN86084_c2_g1	9.35408	3.51e-08	8.09e-07	UP	NA	NA	NA	NA	NA	NA	NA	NA	NA	NA	NA
	TRINITY_DN53017_c0_g1	9.35355	7.95e-11	2.71e-09	UP	TRINITY_DN53017_c0_g1	TraesCS4A01G054400.1	1138	1313	1626	1.16e-61	TraesCS4A01G054400	chr4A	45746732	45750138	Heparanase
	TRINITY_DN65323_c0_g1	9.35236	9.24e-13	4.26e-11	UP	TRINITY_DN65323_c0_g1	TraesCS2D01G125900.1	729	918	918	1.1e-80	TraesCS2D01G125900	chr2D	73312058	73313069	Short-chain dehydrogenase/reductase
	TRINITY_DN27446_c0_g1	9.34705	9.49e-12	3.71e-10	UP	TRINITY_DN27446_c0_g1	TraesCS4B01G319000.1	270	379	1575	9.41e-31	TraesCS4B01G319000	chr4B	609487373	609490460	C-terminal binding protein
	TRINITY_DN38839_c0_g1	9.34628	1.1e-07	2.33e-06	UP	NA	NA	NA	NA	NA	NA	NA	NA	NA	NA	NA
	TRINITY_DN24005_c0_g1	9.34517	2.83e-12	1.21e-10	UP	TRINITY_DN24005_c0_g1	TraesCS7B01G202100.1	373	741	2226	6.26e-113	TraesCS7B01G202100	chr7B	370260526	370267008	Oxysterol-binding family protein
	TRINITY_DN27369_c0_g1	9.34495	5.77e-09	1.48e-07	UP	TRINITY_DN27369_c0_g1	TraesCS7D01G437400.1	1074	1289	1449	6.2e-109	TraesCS7D01G437400	chr7D	556639563	556641011	Ran-binding protein 1 domain-containing
	TRINITY_DN62378_c0_g1	9.3414	2.4e-10	7.66e-09	UP	NA	NA	NA	NA	NA	NA	NA	NA	NA	NA	NA
	TRINITY_DN174847_c0_g1	9.34008	1.84e-12	8.1e-11	UP	NA	NA	NA	NA	NA	NA	NA	NA	NA	NA	NA
	TRINITY_DN17055_c1_g1	9.33815	5.49e-12	2.25e-10	UP	NA	NA	NA	NA	NA	NA	NA	NA	NA	NA	NA
	TRINITY_DN35675_c0_g2	9.33691	1.04e-12	4.77e-11	UP	TRINITY_DN35675_c0_g2	TraesCS2B01G626700.1	489	968	1638	0	TraesCS2B01G626700	chr2B	798743094	798746067	Protein NRT1/ PTR FAMILY 5.5
	TRINITY_DN10182_c0_g1	9.33633	7.45e-13	3.46e-11	UP	NA	NA	NA	NA	NA	NA	NA	NA	NA	NA	NA
	TRINITY_DN63894_c0_g1	9.33482	1.56e-11	5.94e-10	UP	TRINITY_DN63894_c0_g1	TraesCS2A01G552800.1	882	1007	1110	3.18e-57	TraesCS2A01G552800	chr2A	758553979	758559790	ATP-dependent RNA helicase
	TRINITY_DN102400_c0_g4	9.33451	9.42e-11	3.17e-09	UP	NA	NA	NA	NA	NA	NA	NA	NA	NA	NA	NA
	TRINITY_DN11196_c1_g3	9.33431	1e-12	4.59e-11	UP	TRINITY_DN11196_c1_g3	TraesCS7D01G544000.1	2236	2490	2754	3.39e-117	TraesCS7D01G544000	chr7D	632020979	632024254	NBS-LRR-like resistance protein
	TRINITY_DN35860_c0_g1	9.33112	2.33e-12	1.01e-10	UP	TRINITY_DN35860_c0_g1	TraesCS4D01G182300.1	229	425	1230	1.18e-79	TraesCS4D01G182300	chr4D	318494222	318496448	GPN-loop GTPase 1-like protein
	TRINITY_DN85139_c1_g1	9.33112	2.33e-12	1.01e-10	UP	TRINITY_DN85139_c1_g1	TraesCS7D01G526800.1	1	239	1071	2.95e-123	TraesCS7D01G526800	chr7D	622002194	622004211	Receptor-like protein kinase
	TRINITY_DN49189_c0_g1	9.32502	5.98e-10	1.79e-08	UP	TRINITY_DN49189_c0_g1	TraesCS6B01G128700.1	301	557	942	2.59e-133	TraesCS6B01G128700	chr6B	124386509	124388456	BURP domain protein RD22
	TRINITY_DN208427_c0_g1	9.3249	3.9e-09	1.03e-07	UP	NA	NA	NA	NA	NA	NA	NA	NA	NA	NA	NA
	TRINITY_DN29315_c0_g1	9.32483	1.36e-07	2.85e-06	UP	TRINITY_DN29315_c0_g1	TraesCS3D01G013900.1	1289	1634	2046	1.33e-117	TraesCS3D01G013900	chr3D	4966269	4969326	Receptor-like kinase
	TRINITY_DN21617_c0_g5	9.32185	3.02e-12	1.28e-10	UP	TRINITY_DN21617_c0_g5	TraesCS2A01G309300.1	459	527	1965	3.91e-22	TraesCS2A01G309300	chr2A	532491859	532496468	Auxin response factor
	TRINITY_DN13536_c2_g1	9.32158	1.97e-12	8.6e-11	UP	TRINITY_DN13536_c2_g1	TraesCS2B01G625900.1	1050	1786	2145	1.15e-135	TraesCS2B01G625900	chr2B	798390724	798392868	NBS-LRR resistance-like protein
	TRINITY_DN15316_c0_g1	9.32158	1.97e-12	8.6e-11	UP	TRINITY_DN15316_c0_g1	TraesCS6A01G009200.1	483	560	1092	1.71e-23	TraesCS6A01G009200	chr6A	3851504	3853230	Ferredoxin--NADP reductase
	TRINITY_DN108656_c1_g1	9.3163	4.77e-11	1.68e-09	UP	TRINITY_DN108656_c1_g1	TraesCS2B01G041800.1	1122	816	1602	5.27e-131	TraesCS2B01G041800	chr2B	18953072	18955494	Glycosyltransferase
	TRINITY_DN17800_c1_g2	9.31473	1.19e-11	4.59e-10	UP	TRINITY_DN17800_c1_g2	TraesCS5D01G547400.1	101	480	480	7.9e-153	TraesCS5D01G547400	chr5D	555504207	555504816	Receptor-like kinase
	TRINITY_DN30345_c1_g1	9.31429	1.17e-12	5.3e-11	UP	NA	NA	NA	NA	NA	NA	NA	NA	NA	NA	NA
	TRINITY_DN31348_c0_g3	9.31212	3.63e-08	8.35e-07	UP	NA	NA	NA	NA	NA	NA	NA	NA	NA	NA	NA
	TRINITY_DN21770_c0_g3	9.31078	1.76e-12	7.76e-11	UP	NA	NA	NA	NA	NA	NA	NA	NA	NA	NA	NA
	TRINITY_DN28051_c0_g1	9.30955	1.61e-10	5.25e-09	UP	TRINITY_DN28051_c0_g1	TraesCS7A01G302800.1	5	61	1890	7.08e-19	TraesCS7A01G302800	chr7A	424628348	424633970	XH/XS domain protein
	TRINITY_DN27877_c0_g1	9.30845	1.14e-12	5.17e-11	UP	NA	NA	NA	NA	NA	NA	NA	NA	NA	NA	NA
	TRINITY_DN24436_c0_g1	9.30638	1.28e-12	5.77e-11	UP	NA	NA	NA	NA	NA	NA	NA	NA	NA	NA	NA
	TRINITY_DN217812_c0_g1	9.30581	2.83e-12	1.21e-10	UP	NA	NA	NA	NA	NA	NA	NA	NA	NA	NA	NA
	TRINITY_DN49254_c0_g1	9.30538	9.92e-11	3.33e-09	UP	TRINITY_DN49254_c0_g1	TraesCS2A01G023000.1	660	939	1533	2.23e-124	TraesCS2A01G023000	chr2A	11215312	11217739	Cytochrome P450
	TRINITY_DN13100_c1_g2	9.30457	2.74e-09	7.4e-08	UP	TRINITY_DN13100_c1_g2	TraesCS3B01G598600.1	1554	1917	1917	5.35e-179	TraesCS3B01G598600	chr3B	820130589	820133259	Ankyrin repeat-containing protein
	TRINITY_DN57058_c0_g1	9.30084	5.47e-12	2.25e-10	UP	TRINITY_DN57058_c0_g1	TraesCS7B01G489900.1	3298	3528	4260	1.45e-95	TraesCS7B01G489900	chr7B	743650603	743656012	NBS-LRR-like resistance protein
	TRINITY_DN68345_c0_g1	9.30084	5.47e-12	2.25e-10	UP	TRINITY_DN68345_c0_g1	TraesCS4A01G255400.1	2454	2499	2499	3.93e-16	TraesCS4A01G255400	chr4A	567479603	567482101	Serine/threonine-protein kinase
	TRINITY_DN58801_c0_g2	9.29935	4.36e-12	1.82e-10	UP	TRINITY_DN58801_c0_g2	TraesCS7D01G446500.1	625	887	1617	2.17e-71	TraesCS7D01G446500	chr7D	566780637	566789926	transmembrane protein
	TRINITY_DN27925_c0_g1	9.29842	1.51e-12	6.73e-11	UP	TRINITY_DN27925_c0_g1	TraesCS2A01G251000.1	952	844	3309	2.4e-34	TraesCS2A01G251000	chr2A	379115402	379118794	Receptor-like kinase
	TRINITY_DN47625_c0_g1	9.29739	1.44e-11	5.49e-10	UP	TRINITY_DN47625_c0_g1	TraesCS2A01G360000.1	443	400	480	7.47e-13	TraesCS2A01G360000	chr2A	603855754	603856938	Cysteine-rich receptor-like protein kinase 41
	TRINITY_DN29046_c0_g1	9.29613	9.04e-10	2.62e-08	UP	TRINITY_DN29046_c0_g1	TraesCS3A01G001500.1	1	107	1098	7.8e-37	TraesCS3A01G001500	chr3A	1028539	1031377	Protein kinase
	TRINITY_DN46867_c1_g1	9.29474	4.91e-08	1.11e-06	UP	NA	NA	NA	NA	NA	NA	NA	NA	NA	NA	NA
	TRINITY_DN20869_c0_g1	9.29461	1.93e-12	8.45e-11	UP	NA	NA	NA	NA	NA	NA	NA	NA	NA	NA	NA
	TRINITY_DN239157_c0_g1	9.29365	6.81e-12	2.74e-10	UP	TRINITY_DN239157_c0_g1	TraesCS2A01G257600.1	304	81	1236	2.3e-113	TraesCS2A01G257600	chr2A	398470473	398472285	Glutamyl-tRNA(Gln) amidotransferase subunit B, mitochondrial
	TRINITY_DN57834_c1_g1	9.29312	2.24e-12	9.72e-11	UP	NA	NA	NA	NA	NA	NA	NA	NA	NA	NA	NA
	TRINITY_DN39367_c0_g1	9.29144	2.67e-09	7.24e-08	UP	TRINITY_DN39367_c0_g1	TraesCS3D01G486400.1	294	519	519	1.99e-99	TraesCS3D01G486400	chr3D	582249927	582250445	Dirigent protein
	TRINITY_DN1602_c1_g1	9.29099	2.53e-25	7.86e-23	UP	TRINITY_DN1602_c1_g1	TraesCS7B01G430700.1	193	356	369	2.15e-81	TraesCS7B01G430700	chr7B	699148596	699156433	ENTH/ANTH/VHS superfamily protein
	TRINITY_DN29064_c0_g1	9.28912	1.61e-11	6.09e-10	UP	TRINITY_DN29064_c0_g1	TraesCS2D01G531400.1	252	568	1581	1.44e-166	TraesCS2D01G531400	chr2D	617212392	617221132	Serine protease htra2, putative
	TRINITY_DN36540_c0_g2	9.28906	1.08e-10	3.6e-09	UP	TRINITY_DN36540_c0_g2	TraesCS7D01G317300.1	2022	2340	2805	5.2e-166	TraesCS7D01G317300	chr7D	403779946	403785175	Non-lysosomal glucosylceramidase
	TRINITY_DN25189_c2_g1	9.28855	5.56e-42	1.68e-38	UP	TRINITY_DN25189_c2_g1	TraesCS7B01G409900.1	1	240	483	5.67e-123	TraesCS7B01G409900	chr7B	678897014	678901015	2-oxoglutarate (2OG) and Fe(II)-dependent oxygenase superfamily protein
	TRINITY_DN36586_c0_g1	9.2857	3.85e-10	1.19e-08	UP	TRINITY_DN36586_c0_g1	TraesCS2B01G004500.1	954	1257	1425	2.42e-129	TraesCS2B01G004500	chr2B	2404141	2407495	Cytochrome P450 family protein
	TRINITY_DN1775_c0_g4	9.28222	2.79e-07	5.53e-06	UP	TRINITY_DN1775_c0_g4	TraesCS5D01G386200.2	2	98	546	4.22e-41	TraesCS5D01G386200	chr5D	455827342	455832392	Zinc finger protein LSD1
	TRINITY_DN190573_c0_g1	9.27739	1.21e-07	2.54e-06	UP	NA	NA	NA	NA	NA	NA	NA	NA	NA	NA	NA
	TRINITY_DN19020_c1_g3	9.27714	6.63e-08	1.46e-06	UP	NA	NA	NA	NA	NA	NA	NA	NA	NA	NA	NA
	TRINITY_DN29294_c1_g2	9.27553	2.96e-12	1.26e-10	UP	NA	NA	NA	NA	NA	NA	NA	NA	NA	NA	NA
	TRINITY_DN43610_c1_g1	9.2754	2.55e-09	6.92e-08	UP	TRINITY_DN43610_c1_g1	TraesCS7D01G553300.1	1	293	1284	9.39e-150	TraesCS7D01G553300	chr7D	636766504	636770671	Phytoene synthase
	TRINITY_DN25870_c0_g1	9.2743	2.56e-12	1.1e-10	UP	NA	NA	NA	NA	NA	NA	NA	NA	NA	NA	NA
	TRINITY_DN32770_c0_g1	9.27374	7.09e-12	2.84e-10	UP	TRINITY_DN32770_c0_g1	TraesCS5D01G548100.1	735	967	1443	2.49e-83	TraesCS5D01G548100	chr5D	555908625	555910196	Receptor-like protein kinase
	TRINITY_DN58840_c0_g1	9.27301	1.61e-11	6.09e-10	UP	NA	NA	NA	NA	NA	NA	NA	NA	NA	NA	NA
	TRINITY_DN53949_c0_g2	9.27263	8.22e-09	2.07e-07	UP	NA	NA	NA	NA	NA	NA	NA	NA	NA	NA	NA
	TRINITY_DN23932_c5_g1	9.27261	1.36e-06	2.36e-05	UP	NA	NA	NA	NA	NA	NA	NA	NA	NA	NA	NA
	TRINITY_DN14447_c3_g1	9.27021	1.83e-11	6.85e-10	UP	NA	NA	NA	NA	NA	NA	NA	NA	NA	NA	NA
	TRINITY_DN7686_c3_g3	9.26993	2.99e-11	1.09e-09	UP	TRINITY_DN7686_c3_g3	TraesCS4A01G444500.1	1	110	495	6.68e-50	TraesCS4A01G444500	chr4A	712915290	712917030	Haloacid dehalogenase-like hydrolase domain-containing protein 3
	TRINITY_DN145074_c1_g1	9.26829	2.11e-12	9.21e-11	UP	TRINITY_DN145074_c1_g1	TraesCS1A01G365700.1	132	178	963	9.57e-13	TraesCS1A01G365700	chr1A	544594495	544602413	WD repeat protein-like
	TRINITY_DN46081_c0_g1	9.26829	2.11e-12	9.21e-11	UP	TRINITY_DN46081_c0_g1	TraesCS1A01G427200.1	158	211	1482	1.05e-13	TraesCS1A01G427200	chr1A	581589503	581593802	Protein N-methyltransferase
	TRINITY_DN32948_c0_g2	9.26795	9.31e-12	3.65e-10	UP	TRINITY_DN32948_c0_g2	TraesCS7D01G548100.1	2354	2655	2670	7.11e-98	TraesCS7D01G548100	chr7D	633670029	633673188	NBS-LRR disease resistance protein
	TRINITY_DN68413_c1_g1	9.26679	2.11e-12	9.21e-11	UP	NA	NA	NA	NA	NA	NA	NA	NA	NA	NA	NA
	TRINITY_DN48093_c2_g1	9.26554	5.46e-10	1.65e-08	UP	TRINITY_DN48093_c2_g1	TraesCS2B01G371800.1	376	663	1428	4.64e-122	TraesCS2B01G371800	chr2B	530105501	530109652	LA RNA-binding protein
	TRINITY_DN83856_c0_g1	9.26517	4.26e-11	1.51e-09	UP	TRINITY_DN83856_c0_g1	TraesCS7A01G429600.1	517	558	558	1.43e-13	TraesCS7A01G429600	chr7A	624687279	624687936	Adaptin ear-binding coat-associated protein 1
	TRINITY_DN11415_c2_g1	9.26314	2.52e-12	1.09e-10	UP	NA	NA	NA	NA	NA	NA	NA	NA	NA	NA	NA
	TRINITY_DN130693_c0_g1	9.26251	7.32e-09	1.85e-07	UP	NA	NA	NA	NA	NA	NA	NA	NA	NA	NA	NA
	TRINITY_DN97110_c0_g1	9.26077	1.62e-09	4.53e-08	UP	NA	NA	NA	NA	NA	NA	NA	NA	NA	NA	NA
	TRINITY_DN61468_c0_g2	9.26075	2.76e-12	1.18e-10	UP	TRINITY_DN61468_c0_g2	TraesCS2A01G239500.1	2436	2538	2538	9.92e-28	TraesCS2A01G239500	chr2A	332006014	332040887	Pentatricopeptide repeat-containing protein
	TRINITY_DN87161_c0_g1	9.25811	3.18e-09	8.49e-08	UP	TRINITY_DN87161_c0_g1	TraesCS6A01G415800.1	879	1155	1164	2.9e-132	TraesCS6A01G415800	chr6A	615410471	615412538	Sentrin-specific protease
	TRINITY_DN11167_c0_g2	9.25495	3.01e-12	1.28e-10	UP	TRINITY_DN11167_c0_g2	TraesCS4A01G331200.1	974	1067	1068	9.27e-26	TraesCS4A01G331200	chr4A	615941151	615942218	Dolichyl-diphosphooligosaccharide--protein glycosyltransferase subunit DAD1
	TRINITY_DN22314_c0_g2	9.25495	3.01e-12	1.28e-10	UP	TRINITY_DN22314_c0_g2	TraesCS7B01G120700.1	200	545	930	3.45e-56	TraesCS7B01G120700	chr7B	140927350	140930333	TMV-MP30 binding protein 2C
	TRINITY_DN57182_c0_g1	9.25407	2.74e-12	1.17e-10	UP	TRINITY_DN57182_c0_g1	TraesCS7D01G486400.1	2165	2369	2772	7.65e-93	TraesCS7D01G486400	chr7D	596706475	596711624	Disease resistance protein RPM1
	TRINITY_DN14056_c0_g1	9.25397	1.71e-10	5.53e-09	UP	TRINITY_DN14056_c0_g1	TraesCS3A01G499100.1	209	294	939	5.07e-27	TraesCS3A01G499100	chr3A	724375946	724382329	RNA binding protein, putative
	TRINITY_DN73742_c0_g1	9.25313	7.21e-12	2.89e-10	UP	TRINITY_DN73742_c0_g1	TraesCS7D01G414300.1	22	315	2124	8.11e-154	TraesCS7D01G414300	chr7D	532615054	532620652	Aminodeoxychorismate synthase
	TRINITY_DN126225_c1_g1	9.24922	1.5e-11	5.71e-10	UP	TRINITY_DN126225_c1_g1	TraesCS2A01G010200.1	16	445	1233	4.3e-143	TraesCS2A01G010200	chr2A	3964870	3967583	StAR-related lipid transfer protein
	TRINITY_DN165439_c0_g1	9.24891	8.45e-11	2.87e-09	UP	NA	NA	NA	NA	NA	NA	NA	NA	NA	NA	NA
	TRINITY_DN54714_c0_g1	9.24886	2.78e-12	1.19e-10	UP	TRINITY_DN54714_c0_g1	TraesCS2A01G039200.1	687	976	2763	6.36e-135	TraesCS2A01G039200	chr2A	16398757	16405808	23S rRNA (Uracil-5-)-methyltransferase
	TRINITY_DN10697_c0_g2	9.2485	4.67e-10	1.42e-08	UP	NA	NA	NA	NA	NA	NA	NA	NA	NA	NA	NA
	TRINITY_DN75942_c0_g1	9.24538	3.01e-11	1.09e-09	UP	TRINITY_DN75942_c0_g1	TraesCS5A01G217900.1	1	70	930	2.07e-29	TraesCS5A01G217900	chr5A	436089024	436090329	MYB-related transcription factor
	TRINITY_DN73133_c0_g1	9.24489	7.48e-12	2.99e-10	UP	NA	NA	NA	NA	NA	NA	NA	NA	NA	NA	NA
	TRINITY_DN51628_c0_g1	9.24125	2.04e-08	4.86e-07	UP	TRINITY_DN51628_c0_g1	TraesCS7D01G363100.1	887	1239	1632	0	TraesCS7D01G363100	chr7D	467159960	467164447	Beta-glucosidase, putative
	TRINITY_DN48763_c0_g1	9.24054	9.42e-11	3.17e-09	UP	NA	NA	NA	NA	NA	NA	NA	NA	NA	NA	NA
	TRINITY_DN47321_c1_g1	9.24026	6.28e-10	1.87e-08	UP	TRINITY_DN47321_c1_g1	TraesCS7D01G451700.1	893	939	939	1.82e-14	TraesCS7D01G451700	chr7D	571478950	571482385	NAC domain-containing protein
	TRINITY_DN16619_c4_g1	9.23982	7.16e-22	1.26e-19	UP	TRINITY_DN16619_c4_g1	TraesCS7B01G479200.1	1	845	4113	1.17e-167	TraesCS7B01G479200	chr7B	733811146	733815258	NBS-LRR disease resistance protein-like protein
	TRINITY_DN43612_c0_g1	9.23939	1.51e-11	5.76e-10	UP	TRINITY_DN43612_c0_g1	TraesCS4A01G211200.1	474	552	561	7.32e-24	TraesCS4A01G211200	chr4A	504860925	504875568	Polyamine oxidase-like protein
	TRINITY_DN72330_c0_g1	9.23905	3.23e-12	1.37e-10	UP	TRINITY_DN72330_c0_g1	TraesCS5A01G072400.1	517	570	621	8.45e-15	TraesCS5A01G072400	chr5A	83541341	83545828	cytochrome P450, family 81, subfamily D, polypeptide 6
	TRINITY_DN28972_c0_g1	9.23738	5.46e-11	1.91e-09	UP	TRINITY_DN28972_c0_g1	TraesCS2D01G389300.1	1	226	642	1.14e-89	TraesCS2D01G389300	chr2D	495839099	495839740	Protein FAR1-RELATED SEQUENCE 3
	TRINITY_DN8974_c0_g1	9.23533	3.65e-12	1.53e-10	UP	NA	NA	NA	NA	NA	NA	NA	NA	NA	NA	NA
	TRINITY_DN18008_c0_g3	9.2338	3.47e-12	1.46e-10	UP	TRINITY_DN18008_c0_g3	TraesCS7D01G525700.1	739	1305	3498	0	TraesCS7D01G525700	chr7D	621260432	621264925	NBS-LRR-like resistance protein
	TRINITY_DN62121_c0_g1	9.2338	3.47e-12	1.46e-10	UP	TRINITY_DN62121_c0_g1	TraesCS4A01G447500.1	2796	2988	2988	3.58e-95	TraesCS4A01G447500	chr4A	714430281	714433824	NBS-LRR disease resistance protein
	TRINITY_DN13847_c1_g3	9.23235	7.87e-11	2.68e-09	UP	TRINITY_DN13847_c1_g3	TraesCS7D01G378000.1	414	617	1038	5.8e-104	TraesCS7D01G378000	chr7D	489161440	489162552	Gag-Pol polyprotein
	TRINITY_DN39765_c0_g3	9.23196	8.04e-10	2.35e-08	UP	TRINITY_DN39765_c0_g3	TraesCS1B01G319800.1	115	170	270	5.11e-20	TraesCS1B01G319800	chr1B	543843642	543844013	protein phosphatase 2A 55 kDa regulatory subunit B alpha isoform
	TRINITY_DN9299_c1_g2	9.23104	6.95e-10	2.05e-08	UP	NA	NA	NA	NA	NA	NA	NA	NA	NA	NA	NA
	TRINITY_DN12360_c0_g2	9.2295	1.54e-11	5.83e-10	UP	NA	NA	NA	NA	NA	NA	NA	NA	NA	NA	NA
	TRINITY_DN118808_c0_g1	9.22746	5.39e-11	1.89e-09	UP	NA	NA	NA	NA	NA	NA	NA	NA	NA	NA	NA
	TRINITY_DN192046_c0_g1	9.22669	1.01e-11	3.95e-10	UP	NA	NA	NA	NA	NA	NA	NA	NA	NA	NA	NA
	TRINITY_DN40497_c0_g3	9.22512	1.28e-11	4.92e-10	UP	TRINITY_DN40497_c0_g3	TraesCS3D01G042900.1	276	443	447	6.93e-84	TraesCS3D01G042900	chr3D	16447574	16449317	Protein BUD31
	TRINITY_DN41609_c0_g1	9.22013	5.68e-12	2.32e-10	UP	TRINITY_DN41609_c0_g1	TraesCS4B01G395400.1	1	148	429	3.05e-57	TraesCS4B01G395400	chr4B	669575814	669577730	Pentatricopeptide repeat (PPR) superfamily protein
	TRINITY_DN4552_c1_g1	9.21986	8.57e-12	3.38e-10	UP	NA	NA	NA	NA	NA	NA	NA	NA	NA	NA	NA
	TRINITY_DN50899_c0_g2	9.21986	8.57e-12	3.38e-10	UP	TRINITY_DN50899_c0_g2	TraesCS3B01G283100.2	1	1326	1326	0	TraesCS3B01G283100	chr3B	454365375	454374156	Thiosulfate sulfurtransferase/rhodanese-like domain-containing protein 2
	TRINITY_DN20367_c0_g1	9.21958	9.62e-09	2.4e-07	UP	TRINITY_DN20367_c0_g1	TraesCS3A01G179100.1	395	303	417	4.01e-21	TraesCS3A01G179100	chr3A	205689861	205690277	HECT ubiquitin protein ligase family protein KAK
	TRINITY_DN29773_c1_g1	9.21779	2.14e-09	5.87e-08	UP	TRINITY_DN29773_c1_g1	TraesCS2A01G586800.1	35	172	780	7.76e-47	TraesCS2A01G586800	chr2A	777254469	777256454	RING finger protein
	TRINITY_DN46366_c0_g2	9.21767	4.83e-12	2e-10	UP	TRINITY_DN46366_c0_g2	TraesCS3A01G001900.1	122	619	672	1.83e-142	TraesCS3A01G001900	chr3A	1325989	1326660	Heavy metal transport/detoxification superfamily protein
	TRINITY_DN18008_c0_g2	9.21701	4.78e-12	1.98e-10	UP	TRINITY_DN18008_c0_g2	TraesCS7D01G465700.1	145	803	1563	0	TraesCS7D01G465700	chr7D	579759216	579760925	NBS-LRR-like resistance protein
	TRINITY_DN17271_c1_g1	9.21668	4.37e-07	8.37e-06	UP	NA	NA	NA	NA	NA	NA	NA	NA	NA	NA	NA
	TRINITY_DN20471_c0_g1	9.21593	4.69e-10	1.43e-08	UP	TRINITY_DN20471_c0_g1	TraesCS5A01G208600.1	225	1	669	4.6e-108	TraesCS5A01G208600	chr5A	422037126	422040304	F-box protein-like protein
	TRINITY_DN80056_c0_g1	9.21514	1.7e-11	6.41e-10	UP	NA	NA	NA	NA	NA	NA	NA	NA	NA	NA	NA
	TRINITY_DN110812_c4_g1	9.21455	6.07e-12	2.47e-10	UP	TRINITY_DN110812_c4_g1	TraesCS7D01G543300.1	2613	2341	2892	3.53e-142	TraesCS7D01G543300	chr7D	631852400	631856152	Protein FAR1-RELATED SEQUENCE 5
	TRINITY_DN38822_c0_g4	9.21455	6.07e-12	2.47e-10	UP	NA	NA	NA	NA	NA	NA	NA	NA	NA	NA	NA
	TRINITY_DN74869_c0_g2	9.21455	6.07e-12	2.47e-10	UP	NA	NA	NA	NA	NA	NA	NA	NA	NA	NA	NA
	TRINITY_DN32692_c0_g1	9.2139	4.47e-12	1.86e-10	UP	TRINITY_DN32692_c0_g1	TraesCS7A01G559100.1	1171	1302	1302	8.49e-59	TraesCS7A01G559100	chr7A	731096060	731097402	F-box family protein
	TRINITY_DN25173_c0_g1	9.21355	2.21e-11	8.2e-10	UP	NA	NA	NA	NA	NA	NA	NA	NA	NA	NA	NA
	TRINITY_DN66443_c0_g1	9.21226	1.2e-10	3.98e-09	UP	NA	NA	NA	NA	NA	NA	NA	NA	NA	NA	NA
	TRINITY_DN1327_c0_g1	9.21125	1.6e-29	9.71e-27	UP	TRINITY_DN1327_c0_g1	TraesCS6A01G179100.1	1	462	462	0	TraesCS6A01G179100	chr6A	201349420	201349881	H -ATPase 9
	TRINITY_DN111998_c1_g1	9.21012	6.17e-12	2.51e-10	UP	NA	NA	NA	NA	NA	NA	NA	NA	NA	NA	NA
	TRINITY_DN21901_c0_g1	9.21011	3.78e-09	9.97e-08	UP	NA	NA	NA	NA	NA	NA	NA	NA	NA	NA	NA
	TRINITY_DN18294_c0_g4	9.20984	1.1e-11	4.27e-10	UP	NA	NA	NA	NA	NA	NA	NA	NA	NA	NA	NA
	TRINITY_DN51715_c0_g1	9.20957	8.12e-08	1.75e-06	UP	NA	NA	NA	NA	NA	NA	NA	NA	NA	NA	NA
	TRINITY_DN10307_c6_g1	9.20659	7.74e-08	1.68e-06	UP	NA	NA	NA	NA	NA	NA	NA	NA	NA	NA	NA
	TRINITY_DN35908_c0_g1	9.20608	6.57e-12	2.66e-10	UP	TRINITY_DN35908_c0_g1	TraesCS2D01G473500.1	1328	1754	4695	0	TraesCS2D01G473500	chr2D	577126147	577130841	NBS-LRR disease resistance protein-like protein
	TRINITY_DN100293_c0_g1	9.2035	1.02e-09	2.93e-08	UP	TRINITY_DN100293_c0_g1	TraesCS4A01G486800.1	569	779	1653	7.84e-98	TraesCS4A01G486800	chr4A	739680729	739682381	Leucine-rich repeat receptor-like protein kinase family protein, putative
	TRINITY_DN19554_c0_g1	9.20319	7.85e-12	3.12e-10	UP	NA	NA	NA	NA	NA	NA	NA	NA	NA	NA	NA
	TRINITY_DN9204_c0_g4	9.20161	6.94e-12	2.79e-10	UP	TRINITY_DN9204_c0_g4	TraesCS2B01G429700.1	110	156	378	7.28e-15	TraesCS2B01G429700	chr2B	617121639	617122243	Type IV secretion system putative lipoprotein virB7
	TRINITY_DN62645_c0_g3	9.20064	3.21e-10	1e-08	UP	TRINITY_DN62645_c0_g3	TraesCS2D01G016400.1	663	1165	1239	5.13e-158	TraesCS2D01G016400	chr2D	7970131	7972905	NBS-LRR disease resistance protein, putative, expressed
	TRINITY_DN54513_c0_g1	9.19846	6.29e-12	2.55e-10	UP	TRINITY_DN54513_c0_g1	TraesCS7A01G504600.1	1	237	237	3.95e-75	TraesCS7A01G504600	chr7A	692784656	692784892	fimbrin 1
	TRINITY_DN36709_c0_g1	9.19816	1.8e-11	6.77e-10	UP	NA	NA	NA	NA	NA	NA	NA	NA	NA	NA	NA
	TRINITY_DN63401_c0_g1	9.19816	1.8e-11	6.77e-10	UP	TRINITY_DN63401_c0_g1	TraesCS3B01G593900.2	2066	2294	2958	4.15e-91	TraesCS3B01G593900	chr3B	817408885	817413936	NBS-LRR disease resistance protein-like
	TRINITY_DN33146_c0_g2	9.1973	5.27e-11	1.85e-09	UP	NA	NA	NA	NA	NA	NA	NA	NA	NA	NA	NA
	TRINITY_DN39317_c0_g1	9.19528	2.15e-10	6.87e-09	UP	NA	NA	NA	NA	NA	NA	NA	NA	NA	NA	NA
	TRINITY_DN27964_c0_g3	9.19404	1.35e-09	3.8e-08	UP	TRINITY_DN27964_c0_g3	TraesCS7D01G462500.1	183	939	939	0	TraesCS7D01G462500	chr7D	578040264	578041202	Polyadenylate-binding protein 1-B-binding protein
	TRINITY_DN107857_c0_g3	9.19372	5.97e-12	2.44e-10	UP	TRINITY_DN107857_c0_g3	TraesCS7D01G297100.1	5349	5489	5580	4.08e-67	TraesCS7D01G297100	chr7D	375394386	375402589	DNA-directed RNA polymerase subunit
	TRINITY_DN51882_c0_g1	9.19214	6.2e-12	2.52e-10	UP	NA	NA	NA	NA	NA	NA	NA	NA	NA	NA	NA
	TRINITY_DN65982_c0_g1	9.18988	7.45e-12	2.98e-10	UP	TRINITY_DN65982_c0_g1	TraesCS2A01G553100.1	322	803	825	5.52e-168	TraesCS2A01G553100	chr2A	758692485	758693309	F-box domain containing protein
	TRINITY_DN46686_c2_g1	9.18738	8.81e-12	3.46e-10	UP	NA	NA	NA	NA	NA	NA	NA	NA	NA	NA	NA
	TRINITY_DN125736_c1_g1	9.18579	1.02e-11	3.97e-10	UP	NA	NA	NA	NA	NA	NA	NA	NA	NA	NA	NA
	TRINITY_DN71803_c0_g2	9.18512	6.81e-12	2.74e-10	UP	TRINITY_DN71803_c0_g2	TraesCS2B01G245700.1	44	87	336	1.26e-12	TraesCS2B01G245700	chr2B	249529183	249530175	Peptide-N-acetylglucosaminyltransferase
	TRINITY_DN23260_c0_g3	9.18419	1.21e-11	4.64e-10	UP	NA	NA	NA	NA	NA	NA	NA	NA	NA	NA	NA
	TRINITY_DN24179_c0_g3	9.18285	9.11e-12	3.57e-10	UP	TRINITY_DN24179_c0_g3	TraesCS4A01G444700.1	1	729	1146	0	TraesCS4A01G444700	chr4A	713014959	713016104	Disease resistance protein (NBS-LRR class) family
	TRINITY_DN70107_c0_g1	9.18126	8.88e-12	3.49e-10	UP	TRINITY_DN70107_c0_g1	TraesCS5A01G338100.1	1266	1467	1467	7.45e-103	TraesCS5A01G338100	chr5A	546205973	546207550	Ankyrin repeat family protein, putative, expressed
	TRINITY_DN55343_c1_g3	9.17849	6.89e-11	2.37e-09	UP	TRINITY_DN55343_c1_g3	TraesCS6A01G093600.1	91	33	735	6.76e-09	TraesCS6A01G093600	chr6A	61210055	61210789	Ig heavy chain V region VH558 B4
	TRINITY_DN156970_c0_g3	9.17806	7.93e-12	3.15e-10	UP	TRINITY_DN156970_c0_g3	TraesCS1D01G086100.1	210	408	408	1.68e-82	TraesCS1D01G086100	chr1D	70459799	70460206	ATP-dependent zinc metalloprotease FTSH 8, mitochondrial
	TRINITY_DN64916_c0_g1	9.17806	7.93e-12	3.15e-10	UP	TRINITY_DN64916_c0_g1	TraesCS1B01G256300.1	251	371	1524	3.26e-24	TraesCS1B01G256300	chr1B	451907751	451920586	Decapping nuclease rai1
	TRINITY_DN149828_c0_g1	9.17477	2.06e-10	6.62e-09	UP	TRINITY_DN149828_c0_g1	TraesCS3D01G342300.1	1	213	213	1.82e-55	TraesCS3D01G342300	chr3D	455014922	455015134	AP2/B3-like transcriptional factor family protein
	TRINITY_DN47953_c0_g2	9.17283	7.46e-11	2.55e-09	UP	NA	NA	NA	NA	NA	NA	NA	NA	NA	NA	NA
	TRINITY_DN80367_c0_g1	9.17278	9.34e-10	2.71e-08	UP	TRINITY_DN80367_c0_g1	TraesCS7D01G523500.1	720	858	858	1.05e-67	TraesCS7D01G523500	chr7D	620085494	620086955	Carbonic anhydrase
	TRINITY_DN24351_c0_g1	9.17166	8.84e-12	3.48e-10	UP	TRINITY_DN24351_c0_g1	TraesCS2B01G044900.1	3130	3267	3267	2.14e-58	TraesCS2B01G044900	chr2B	21950585	21953929	NBS-LRR-like resistance protein
	TRINITY_DN23845_c0_g1	9.17005	1.05e-11	4.06e-10	UP	TRINITY_DN23845_c0_g1	TraesCS6B01G081400.1	548	312	1167	3.1e-122	TraesCS6B01G081400	chr6B	57724961	57726698	F-box domain containing protein, expressed
	TRINITY_DN77204_c1_g1	9.16748	2.42e-09	6.6e-08	UP	NA	NA	NA	NA	NA	NA	NA	NA	NA	NA	NA
	TRINITY_DN22009_c0_g1	9.16615	9.03e-12	3.54e-10	UP	TRINITY_DN22009_c0_g1	TraesCS7D01G436300.1	4858	5282	6336	0	TraesCS7D01G436300	chr7D	555047327	555058398	NBS-LRR-like resistance protein
	TRINITY_DN52265_c0_g2	9.16412	7.52e-11	2.58e-09	UP	NA	NA	NA	NA	NA	NA	NA	NA	NA	NA	NA
	TRINITY_DN3859_c0_g2	9.16108	1.19e-10	3.95e-09	UP	TRINITY_DN3859_c0_g2	TraesCS2B01G002100.1	1	238	666	2.85e-68	TraesCS2B01G002100	chr2B	1348975	1361789	Inosine-5'-monophosphate dehydrogenase
	TRINITY_DN39840_c0_g1	9.16031	3.36e-11	1.21e-09	UP	TRINITY_DN39840_c0_g1	TraesCS2A01G209000.1	728	829	852	6.24e-35	TraesCS2A01G209000	chr2A	192068267	192070573	Tetratricopeptide repeat (TPR)-like superfamily protein
	TRINITY_DN21075_c0_g2	9.15899	1.05e-11	4.07e-10	UP	TRINITY_DN21075_c0_g2	TraesCS2B01G069300.1	1627	2300	3684	1.81e-97	TraesCS2B01G069300	chr2B	36779749	36796781	NBS-LRR disease resistance protein-like
	TRINITY_DN65109_c0_g1	9.15867	4.34e-11	1.54e-09	UP	TRINITY_DN65109_c0_g1	TraesCS7D01G367100.1	1	135	1281	1.73e-65	TraesCS7D01G367100	chr7D	475145377	475150028	Dentin sialophosphoprotein-like
	TRINITY_DN70778_c0_g1	9.15854	1.28e-07	2.68e-06	UP	NA	NA	NA	NA	NA	NA	NA	NA	NA	NA	NA
	TRINITY_DN39535_c0_g1	9.15806	4.13e-07	7.93e-06	UP	NA	NA	NA	NA	NA	NA	NA	NA	NA	NA	NA
	TRINITY_DN15044_c0_g1	9.15575	1.05e-11	4.08e-10	UP	TRINITY_DN15044_c0_g1	TraesCS2D01G264200.1	1	79	1554	2e-34	TraesCS2D01G264200	chr2D	323074705	323077974	Sugar transporter, putative
	TRINITY_DN5407_c1_g1	9.15575	1.05e-11	4.08e-10	UP	NA	NA	NA	NA	NA	NA	NA	NA	NA	NA	NA
	TRINITY_DN36358_c0_g1	9.15035	2.07e-10	6.65e-09	UP	TRINITY_DN36358_c0_g1	TraesCS2B01G076400.1	1	460	1188	0	TraesCS2B01G076400	chr2B	41381179	41382545	2-oxoglutarate (2OG) and Fe(II)-dependent oxygenase superfamily protein
	TRINITY_DN22580_c0_g1	9.14925	1.59e-11	6.03e-10	UP	NA	NA	NA	NA	NA	NA	NA	NA	NA	NA	NA
	TRINITY_DN102292_c0_g1	9.14631	2.63e-06	4.28e-05	UP	NA	NA	NA	NA	NA	NA	NA	NA	NA	NA	NA
	TRINITY_DN43379_c0_g1	9.14623	1.78e-11	6.67e-10	UP	NA	NA	NA	NA	NA	NA	NA	NA	NA	NA	NA
	TRINITY_DN1157_c1_g1	9.1445	3.9e-07	7.52e-06	UP	TRINITY_DN1157_c1_g1	TraesCSU01G222700.1	479	516	516	1.09e-11	TraesCSU01G222700	chrUn	329048765	329049280	Blue copper protein
	TRINITY_DN118191_c0_g1	9.1445	3.9e-07	7.52e-06	UP	TRINITY_DN118191_c0_g1	TraesCS2A01G558300.1	161	220	1674	6.42e-24	TraesCS2A01G558300	chr2A	761856303	761859395	Receptor-like protein kinase
	TRINITY_DN59162_c0_g1	9.14347	1.97e-10	6.33e-09	UP	TRINITY_DN59162_c0_g1	TraesCS2B01G259000.1	85	170	441	7.34e-25	TraesCS2B01G259000	chr2B	320341437	320346101	oligopeptide transporter 1
	TRINITY_DN21358_c0_g3	9.14295	1.44e-11	5.47e-10	UP	NA	NA	NA	NA	NA	NA	NA	NA	NA	NA	NA
	TRINITY_DN35467_c1_g1	9.14185	1.17e-09	3.34e-08	UP	TRINITY_DN35467_c1_g1	TraesCS7A01G402800.1	141	83	264	4.21e-19	TraesCS7A01G402800	chr7A	582569207	582569622	glucan synthase-like 3
	TRINITY_DN30311_c0_g1	9.14014	1.77e-09	4.9e-08	UP	NA	NA	NA	NA	NA	NA	NA	NA	NA	NA	NA
	TRINITY_DN10346_c0_g3	9.13708	2.35e-11	8.69e-10	UP	TRINITY_DN10346_c0_g3	TraesCS2D01G475800.1	906	1491	1491	0	TraesCS2D01G475800	chr2D	578332873	578334363	Tyrosine decarboxylase
	TRINITY_DN57999_c0_g1	9.13542	2.85e-11	1.04e-09	UP	TRINITY_DN57999_c0_g1	TraesCS3B01G409900.1	1	162	585	7.96e-54	TraesCS3B01G409900	chr3B	646714968	646716702	Thioredoxin-like protein 4A
	TRINITY_DN37718_c0_g1	9.13469	8.11e-10	2.37e-08	UP	TRINITY_DN37718_c0_g1	TraesCS7A01G514100.1	343	425	441	5.97e-25	TraesCS7A01G514100	chr7A	700450867	700451307	NHL domain-containing protein, putative
	TRINITY_DN54776_c0_g1	9.13339	4.4e-11	1.56e-09	UP	TRINITY_DN54776_c0_g1	TraesCS6A01G018300.1	679	729	729	3.96e-17	TraesCS6A01G018300	chr6A	8994082	8994810	Mitochondrial transcription termination factor-like
	TRINITY_DN18739_c0_g3	9.13209	4.45e-11	1.57e-09	UP	TRINITY_DN18739_c0_g3	TraesCS6A01G347800.1	1002	916	1272	3.62e-29	TraesCS6A01G347800	chr6A	580196445	580202598	Diacylglycerol kinase
	TRINITY_DN70309_c0_g1	9.13172	3.58e-11	1.29e-09	UP	NA	NA	NA	NA	NA	NA	NA	NA	NA	NA	NA
	TRINITY_DN24534_c0_g1	9.12979	2.15e-11	7.98e-10	UP	TRINITY_DN24534_c0_g1	TraesCS2A01G432700.1	408	506	3246	7.09e-19	TraesCS2A01G432700	chr2A	685957134	685968395	Calcium-transporting ATPase
	TRINITY_DN234907_c0_g1	9.12576	8.04e-10	2.35e-08	UP	NA	NA	NA	NA	NA	NA	NA	NA	NA	NA	NA
	TRINITY_DN56280_c0_g1	9.12576	8.04e-10	2.35e-08	UP	NA	NA	NA	NA	NA	NA	NA	NA	NA	NA	NA
	TRINITY_DN64155_c0_g1	9.12535	1.44e-10	4.71e-09	UP	TRINITY_DN64155_c0_g1	TraesCS1A01G011100.1	1	89	429	4.74e-33	TraesCS1A01G011100	chr1A	6566237	6566877	30S ribosomal protein S19
	TRINITY_DN50223_c1_g1	9.12358	1.57e-09	4.38e-08	UP	TRINITY_DN50223_c1_g1	TraesCS2A01G248600.1	364	160	597	3.51e-101	TraesCS2A01G248600	chr2A	372371269	372371865	Cytidylate kinase
	TRINITY_DN163510_c1_g2	9.12341	1.9e-11	7.09e-10	UP	NA	NA	NA	NA	NA	NA	NA	NA	NA	NA	NA
	TRINITY_DN11151_c0_g2	9.12222	1.93e-10	6.22e-09	UP	TRINITY_DN11151_c0_g2	TraesCS2B01G058500.1	1049	1118	1434	4.61e-26	TraesCS2B01G058500	chr2B	28424688	28428687	Sugar transporter, putative
	TRINITY_DN22228_c0_g1	9.1208	2.17e-11	8.05e-10	UP	NA	NA	NA	NA	NA	NA	NA	NA	NA	NA	NA
	TRINITY_DN49017_c1_g2	9.12011	8.72e-10	2.54e-08	UP	TRINITY_DN49017_c1_g2	TraesCS7A01G413100.1	1544	1702	1716	2.85e-65	TraesCS7A01G413100	chr7A	603943823	603945969	Peptide transporter
	TRINITY_DN10315_c1_g2	9.11842	1.83e-11	6.86e-10	UP	TRINITY_DN10315_c1_g2	TraesCS2B01G021900.1	1	134	963	1.12e-54	TraesCS2B01G021900	chr2B	10595976	10598879	receptor kinase 1
	TRINITY_DN36906_c1_g1	9.11805	1.08e-10	3.61e-09	UP	TRINITY_DN36906_c1_g1	TraesCS1A01G026400.1	978	1203	2610	3.86e-111	TraesCS1A01G026400	chr1A	12586749	12590845	Disease resistance protein (NBS-LRR class) family
	TRINITY_DN77294_c0_g2	9.1172	3.27e-08	7.57e-07	UP	TRINITY_DN77294_c0_g2	TraesCS4A01G055100.1	310	442	1443	1.97e-44	TraesCS4A01G055100	chr4A	46147357	46148799	Glycosyltransferase
	TRINITY_DN46001_c0_g1	9.11677	7.97e-10	2.34e-08	UP	TRINITY_DN46001_c0_g1	TraesCSU01G081900.1	1	168	2937	1.03e-83	TraesCSU01G081900	chrUn	74811000	74816837	Protein argonaute
	TRINITY_DN48644_c0_g1	9.1151	1.97e-11	7.33e-10	UP	TRINITY_DN48644_c0_g1	TraesCS7A01G015200.1	1622	1937	2535	5.54e-131	TraesCS7A01G015200	chr7A	6651167	6658327	receptor kinase 1
	TRINITY_DN44408_c0_g1	9.11503	1.13e-09	3.24e-08	UP	NA	NA	NA	NA	NA	NA	NA	NA	NA	NA	NA
	TRINITY_DN58951_c0_g3	9.11503	1.13e-09	3.24e-08	UP	NA	NA	NA	NA	NA	NA	NA	NA	NA	NA	NA
	TRINITY_DN60062_c0_g1	9.11175	2.37e-11	8.73e-10	UP	NA	NA	NA	NA	NA	NA	NA	NA	NA	NA	NA
	TRINITY_DN46829_c0_g1	9.10801	5.03e-09	1.3e-07	UP	NA	NA	NA	NA	NA	NA	NA	NA	NA	NA	NA
	TRINITY_DN183551_c0_g1	9.10634	9.35e-11	3.15e-09	UP	TRINITY_DN183551_c0_g1	TraesCS2A01G523400.1	455	518	831	6.45e-21	TraesCS2A01G523400	chr2A	745024120	745027179	Shikimate kinase
	TRINITY_DN57645_c1_g1	9.10623	7.22e-09	1.83e-07	UP	NA	NA	NA	NA	NA	NA	NA	NA	NA	NA	NA
	TRINITY_DN58972_c0_g1	9.10501	5.04e-11	1.77e-09	UP	TRINITY_DN58972_c0_g1	TraesCS4A01G447500.1	2334	2739	2988	4.09e-153	TraesCS4A01G447500	chr4A	714430281	714433824	NBS-LRR disease resistance protein
	TRINITY_DN19466_c0_g3	9.10463	7.41e-11	2.54e-09	UP	TRINITY_DN19466_c0_g3	TraesCS3B01G249100.1	162	312	312	1.79e-74	TraesCS3B01G249100	chr3B	397262246	397263429	Expansin protein
	TRINITY_DN48675_c0_g1	9.10463	7.41e-11	2.54e-09	UP	TRINITY_DN48675_c0_g1	TraesCS1A01G246200.1	1	52	579	4.86e-16	TraesCS1A01G246200	chr1A	436387441	436390325	GDP-mannose transporter 1
	TRINITY_DN61648_c1_g1	9.1036	2.51e-11	9.21e-10	UP	NA	NA	NA	NA	NA	NA	NA	NA	NA	NA	NA
	TRINITY_DN56528_c0_g1	9.10066	1.92e-10	6.18e-09	UP	NA	NA	NA	NA	NA	NA	NA	NA	NA	NA	NA
	TRINITY_DN58603_c0_g1	9.0982	5.34e-09	1.37e-07	UP	NA	NA	NA	NA	NA	NA	NA	NA	NA	NA	NA
	TRINITY_DN84606_c0_g1	9.09783	3.79e-11	1.36e-09	UP	TRINITY_DN84606_c0_g1	TraesCS7A01G055700.1	1164	1471	1929	3.18e-128	TraesCS7A01G055700	chr7A	26789350	26791464	Protein arginine N-methyltransferase HSL7
	TRINITY_DN39666_c3_g1	9.09686	1.11e-09	3.2e-08	UP	TRINITY_DN39666_c3_g1	TraesCS7D01G131200.1	1704	1641	1704	7.72e-21	TraesCS7D01G131200	chr7D	83339642	83344929	Disease resistance protein (TIR-NBS-LRR class) family
	TRINITY_DN23008_c0_g1	9.0951	1.59e-09	4.43e-08	UP	NA	NA	NA	NA	NA	NA	NA	NA	NA	NA	NA
	TRINITY_DN61625_c0_g3	9.09499	4.53e-10	1.38e-08	UP	TRINITY_DN61625_c0_g3	TraesCS3A01G017200.1	767	1104	1863	1.52e-176	TraesCS3A01G017200	chr3A	10954643	10957531	Receptor-like kinase
	TRINITY_DN26413_c0_g1	9.09444	3.01e-11	1.1e-09	UP	TRINITY_DN26413_c0_g1	TraesCS7D01G373000.1	1	81	444	2.52e-35	TraesCS7D01G373000	chr7D	483297821	483298557	Nucleic acid binding protein
	TRINITY_DN38355_c0_g1	9.08693	4.08e-11	1.45e-09	UP	NA	NA	NA	NA	NA	NA	NA	NA	NA	NA	NA
	TRINITY_DN8513_c0_g2	9.08693	4.08e-11	1.45e-09	UP	TRINITY_DN8513_c0_g2	TraesCS7B01G355200.1	896	606	966	1.96e-105	TraesCS7B01G355200	chr7B	614181350	614182419	Early nodulin-like protein
	TRINITY_DN93485_c0_g2	9.08693	4.08e-11	1.45e-09	UP	NA	NA	NA	NA	NA	NA	NA	NA	NA	NA	NA
	TRINITY_DN25267_c0_g1	9.08596	2.96e-11	1.08e-09	UP	NA	NA	NA	NA	NA	NA	NA	NA	NA	NA	NA
	TRINITY_DN18467_c0_g1	9.08323	8.68e-11	2.94e-09	UP	NA	NA	NA	NA	NA	NA	NA	NA	NA	NA	NA
	TRINITY_DN62686_c0_g1	9.08323	8.68e-11	2.94e-09	UP	TRINITY_DN62686_c0_g1	TraesCS4D01G048300.1	14	220	432	5.98e-105	TraesCS4D01G048300	chr4D	24250900	24253601	Hexosyltransferase
	TRINITY_DN15449_c0_g2	9.08055	4.6e-09	1.2e-07	UP	NA	NA	NA	NA	NA	NA	NA	NA	NA	NA	NA
	TRINITY_DN3944_c0_g2	9.07787	4.51e-08	1.02e-06	UP	TRINITY_DN3944_c0_g2	TraesCS7D01G306400.1	1932	1753	1932	3.35e-87	TraesCS7D01G306400	chr7D	387911585	387916284	BTB/POZ domain-containing protein
	TRINITY_DN18072_c0_g2	9.07694	9.97e-09	2.48e-07	UP	TRINITY_DN18072_c0_g2	TraesCS6A01G327900.1	194	325	327	2.18e-48	TraesCS6A01G327900	chr6A	560829081	560829407	Chaperone dnaJ-like protein
	TRINITY_DN11022_c4_g5	9.0745	3.81e-10	1.18e-08	UP	TRINITY_DN11022_c4_g5	TraesCS3A01G521100.2	809	1034	2226	6.93e-28	TraesCS3A01G521100	chr3A	737797014	737800808	receptor kinase 1
	TRINITY_DN77863_c0_g1	9.07422	4e-11	1.43e-09	UP	TRINITY_DN77863_c0_g1	TraesCS7D01G412800.1	2670	2838	2838	9.39e-81	TraesCS7D01G412800	chr7D	531082809	531089409	Zinc-transporting ATPase
	TRINITY_DN23795_c1_g1	9.07354	1e-10	3.36e-09	UP	TRINITY_DN23795_c1_g1	TraesCS4A01G388600.1	104	348	1026	5.85e-75	TraesCS4A01G388600	chr4A	666149057	666151389	Fatty acyl-CoA reductase
	TRINITY_DN897_c0_g2	9.07226	9.37e-27	3.75e-24	UP	TRINITY_DN897_c0_g2	TraesCS6D01G390700.1	1	672	672	0	TraesCS6D01G390700	chr6D	465957649	465959722	dyggve-melchior-clausen syndrome protein
	TRINITY_DN23906_c0_g1	9.06965	4.19e-08	9.55e-07	UP	TRINITY_DN23906_c0_g1	TraesCS3A01G133500.1	154	250	351	1.45e-30	TraesCS3A01G133500	chr3A	110680985	110682455	Guanine nucleotide-binding protein-like NSN1
	TRINITY_DN112993_c2_g1	9.06787	3.68e-07	7.14e-06	UP	TRINITY_DN112993_c2_g1	TraesCS5B01G226400.1	2070	1847	2070	6.51e-115	TraesCS5B01G226400	chr5B	403533378	403535447	Cyclic nucleotide-gated channel
	TRINITY_DN70528_c0_g1	9.06771	1.95e-10	6.26e-09	UP	NA	NA	NA	NA	NA	NA	NA	NA	NA	NA	NA
	TRINITY_DN51670_c0_g1	9.06737	1.55e-09	4.34e-08	UP	NA	NA	NA	NA	NA	NA	NA	NA	NA	NA	NA
	TRINITY_DN47603_c0_g1	9.06661	5.4e-11	1.89e-09	UP	NA	NA	NA	NA	NA	NA	NA	NA	NA	NA	NA
	TRINITY_DN31042_c0_g1	9.06339	5.29e-10	1.6e-08	UP	TRINITY_DN31042_c0_g1	TraesCS1A01G002100.1	732	972	2253	1.17e-77	TraesCS1A01G002100	chr1A	1170556	1177090	Tripartite motif-containing protein 29
	TRINITY_DN28777_c0_g1	9.06032	4.14e-08	9.44e-07	UP	TRINITY_DN28777_c0_g1	TraesCS3D01G434300.1	1	84	432	3.17e-37	TraesCS3D01G434300	chr3D	546807490	546811374	Heavy metal transport/detoxification superfamily protein, putative
	TRINITY_DN58737_c0_g3	9.05969	4.11e-11	1.46e-09	UP	TRINITY_DN58737_c0_g3	TraesCS7A01G559700.1	662	960	960	8.24e-100	TraesCS7A01G559700	chr7A	731615071	731616030	F-box domain containing protein
	TRINITY_DN72820_c0_g1	9.05789	1.4e-09	3.94e-08	UP	NA	NA	NA	NA	NA	NA	NA	NA	NA	NA	NA
	TRINITY_DN35458_c1_g1	9.05759	8.96e-09	2.24e-07	UP	NA	NA	NA	NA	NA	NA	NA	NA	NA	NA	NA
	TRINITY_DN49955_c0_g1	9.05721	6.33e-11	2.19e-09	UP	NA	NA	NA	NA	NA	NA	NA	NA	NA	NA	NA
	TRINITY_DN37106_c0_g1	9.05657	2.16e-10	6.91e-09	UP	TRINITY_DN37106_c0_g1	TraesCS7D01G246400.2	127	400	405	2.46e-114	TraesCS7D01G246400	chr7D	215265196	215266972	Cytosolic phospholipase A2 gamma
	TRINITY_DN4357_c2_g1	9.05547	6.04e-11	2.09e-09	UP	TRINITY_DN4357_c2_g1	TraesCS2D01G508100.1	751	879	879	1.48e-53	TraesCS2D01G508100	chr2D	601256591	601259430	Nuclease S1
	TRINITY_DN82312_c1_g1	9.05547	6.04e-11	2.09e-09	UP	NA	NA	NA	NA	NA	NA	NA	NA	NA	NA	NA
	TRINITY_DN43299_c0_g1	9.05274	5.41e-11	1.89e-09	UP	TRINITY_DN43299_c0_g1	TraesCS6A01G091500.1	692	730	1236	1.46e-07	TraesCS6A01G091500	chr6A	60167837	60173541	UBX domain-containing protein 1
	TRINITY_DN222577_c0_g1	9.05176	1.46e-07	3.03e-06	UP	NA	NA	NA	NA	NA	NA	NA	NA	NA	NA	NA
	TRINITY_DN60534_c1_g1	9.05102	1.39e-06	2.41e-05	UP	TRINITY_DN60534_c1_g1	TraesCSU01G086700.1	745	815	1281	2.32e-28	TraesCSU01G086700	chrUn	77275641	77280011	Segregation and condensation protein B
	TRINITY_DN36245_c0_g1	9.05039	1.06e-09	3.05e-08	UP	NA	NA	NA	NA	NA	NA	NA	NA	NA	NA	NA
	TRINITY_DN39345_c0_g1	9.04951	9.47e-11	3.18e-09	UP	NA	NA	NA	NA	NA	NA	NA	NA	NA	NA	NA
	TRINITY_DN81433_c1_g1	9.04719	8.52e-08	1.83e-06	UP	NA	NA	NA	NA	NA	NA	NA	NA	NA	NA	NA
	TRINITY_DN59837_c0_g2	9.04536	7.24e-07	1.33e-05	UP	NA	NA	NA	NA	NA	NA	NA	NA	NA	NA	NA
	TRINITY_DN48927_c0_g1	9.045	5.74e-11	2e-09	UP	TRINITY_DN48927_c0_g1	TraesCSU01G149100.1	981	1110	1152	1.17e-47	TraesCSU01G149100	chrUn	177131438	177132904	Cytochrome P450
	TRINITY_DN19221_c0_g3	9.04453	5.66e-10	1.7e-08	UP	TRINITY_DN19221_c0_g3	TraesCS6D01G046900.1	1	241	582	4.49e-124	TraesCS6D01G046900	chr6D	21352165	21356137	Chaperone protein htpG family protein
	TRINITY_DN29770_c0_g1	9.04073	6.08e-11	2.11e-09	UP	NA	NA	NA	NA	NA	NA	NA	NA	NA	NA	NA
	TRINITY_DN917_c2_g1	9.03941	4.77e-10	1.45e-08	UP	NA	NA	NA	NA	NA	NA	NA	NA	NA	NA	NA
	TRINITY_DN59178_c0_g1	9.03872	1.71e-08	4.11e-07	UP	NA	NA	NA	NA	NA	NA	NA	NA	NA	NA	NA
	TRINITY_DN17063_c0_g2	9.03861	3.03e-10	9.51e-09	UP	NA	NA	NA	NA	NA	NA	NA	NA	NA	NA	NA
	TRINITY_DN257466_c0_g1	9.03726	2.18e-09	5.98e-08	UP	NA	NA	NA	NA	NA	NA	NA	NA	NA	NA	NA
	TRINITY_DN31734_c0_g1	9.03722	6.01e-11	2.09e-09	UP	TRINITY_DN31734_c0_g1	TraesCS6B01G466000.1	1959	2295	2295	1.65e-47	TraesCS6B01G466000	chr6B	716455575	716477111	receptor kinase 2
	TRINITY_DN67911_c0_g2	9.03686	1.24e-08	3.04e-07	UP	NA	NA	NA	NA	NA	NA	NA	NA	NA	NA	NA
	TRINITY_DN108646_c0_g1	9.0362	1.13e-10	3.76e-09	UP	NA	NA	NA	NA	NA	NA	NA	NA	NA	NA	NA
	TRINITY_DN58048_c0_g1	9.03382	2.96e-08	6.9e-07	UP	TRINITY_DN58048_c0_g1	TraesCS5D01G268500.1	184	403	1080	7.36e-90	TraesCS5D01G268500	chr5D	371798439	371801404	Ribonuclease Z family protein
	TRINITY_DN19737_c0_g1	9.0291	1.63e-10	5.29e-09	UP	TRINITY_DN19737_c0_g1	TraesCS7A01G040900.1	82	328	1782	1.97e-114	TraesCS7A01G040900	chr7A	19003197	19007400	Sucrose synthase
	TRINITY_DN25037_c0_g1	9.02904	3.2e-10	1e-08	UP	NA	NA	NA	NA	NA	NA	NA	NA	NA	NA	NA
	TRINITY_DN57641_c2_g1	9.02804	4.96e-10	1.51e-08	UP	NA	NA	NA	NA	NA	NA	NA	NA	NA	NA	NA
	TRINITY_DN10431_c1_g5	9.02544	1.25e-08	3.05e-07	UP	NA	NA	NA	NA	NA	NA	NA	NA	NA	NA	NA
	TRINITY_DN60379_c1_g1	9.02544	1.25e-08	3.05e-07	UP	TRINITY_DN60379_c1_g1	TraesCS1A01G365100.1	2091	2338	2427	2.51e-128	TraesCS1A01G365100	chr1A	544465497	544475087	Phospholipase D
	TRINITY_DN37393_c0_g1	9.02442	3.03e-10	9.51e-09	UP	TRINITY_DN37393_c0_g1	TraesCS2A01G361700.1	19	253	1590	4.01e-116	TraesCS2A01G361700	chr2A	605400017	605402122	Disease resistance protein RPM1
	TRINITY_DN211396_c0_g1	9.02399	4.52e-09	1.18e-07	UP	TRINITY_DN211396_c0_g1	TraesCS7D01G466700.1	308	55	939	1.19e-131	TraesCS7D01G466700	chr7D	580478329	580479417	Pleiotropic drug resistance protein 1
	TRINITY_DN22795_c0_g2	9.02231	9.11e-11	3.07e-09	UP	NA	NA	NA	NA	NA	NA	NA	NA	NA	NA	NA
	TRINITY_DN37086_c0_g1	9.02231	9.11e-11	3.07e-09	UP	NA	NA	NA	NA	NA	NA	NA	NA	NA	NA	NA
	TRINITY_DN62537_c0_g1	9.02153	9.21e-11	3.1e-09	UP	TRINITY_DN62537_c0_g1	TraesCS7D01G539200.1	1878	2025	2496	8.17e-73	TraesCS7D01G539200	chr7D	629531041	629536386	Copalyl diphosphate synthase-like protein
	TRINITY_DN31084_c1_g3	9.02081	2.11e-10	6.77e-09	UP	TRINITY_DN31084_c1_g3	TraesCS4A01G346000.1	318	490	492	6.03e-53	TraesCS4A01G346000	chr4A	625128444	625129887	Proline synthase co-transcribed bacterial
	TRINITY_DN39320_c0_g1	9.01975	8.79e-11	2.97e-09	UP	NA	NA	NA	NA	NA	NA	NA	NA	NA	NA	NA
	TRINITY_DN19811_c0_g1	9.01874	1.17e-10	3.88e-09	UP	NA	NA	NA	NA	NA	NA	NA	NA	NA	NA	NA
	TRINITY_DN9295_c0_g3	9.01797	8.63e-11	2.93e-09	UP	TRINITY_DN9295_c0_g3	TraesCS7A01G359600.1	1	433	441	6.18e-138	TraesCS7A01G359600	chr7A	533506343	533506783	Acetyl-coenzyme A carboxylase carboxyl transferase subunit beta, chloroplastic
	TRINITY_DN71352_c0_g1	9.01621	3.24e-09	8.64e-08	UP	NA	NA	NA	NA	NA	NA	NA	NA	NA	NA	NA
	TRINITY_DN26541_c0_g2	9.01619	8.74e-11	2.96e-09	UP	NA	NA	NA	NA	NA	NA	NA	NA	NA	NA	NA
	TRINITY_DN100459_c0_g1	9.01515	1.67e-10	5.44e-09	UP	TRINITY_DN100459_c0_g1	TraesCS6B01G064300.1	145	243	621	2.59e-38	TraesCS6B01G064300	chr6B	42510567	42512153	60S ribosomal protein L13
	TRINITY_DN36840_c0_g3	9.01426	2.03e-09	5.6e-08	UP	TRINITY_DN36840_c0_g3	TraesCS2B01G047200.1	1314	1578	1578	1.56e-137	TraesCS2B01G047200	chr2B	23554677	23557208	Hfr-2-like protein
	TRINITY_DN45536_c0_g1	9.01362	1.16e-10	3.84e-09	UP	TRINITY_DN45536_c0_g1	TraesCS2D01G540700.1	1	72	438	1.7e-30	TraesCS2D01G540700	chr2D	620295657	620296357	Heavy metal transport/detoxification superfamily protein
	TRINITY_DN41807_c0_g1	9.01261	9.78e-11	3.28e-09	UP	TRINITY_DN41807_c0_g1	TraesCSU01G111400.1	3830	4102	4341	3.53e-142	TraesCSU01G111400	chrUn	95971086	95978335	NBS-LRR-like resistance protein
	TRINITY_DN9966_c0_g2	9.01205	9.62e-09	2.4e-07	UP	TRINITY_DN9966_c0_g2	TraesCS2A01G364900.1	1	768	768	0	TraesCS2A01G364900	chr2A	608784171	608787130	Myb/SANT-like DNA-binding domain protein
	TRINITY_DN22088_c3_g1	9.01184	6.05e-08	1.34e-06	UP	NA	NA	NA	NA	NA	NA	NA	NA	NA	NA	NA
	TRINITY_DN95791_c0_g1	9.01112	2.78e-10	8.78e-09	UP	TRINITY_DN95791_c0_g1	TraesCS6B01G033300.1	385	622	1302	8.67e-123	TraesCS6B01G033300	chr6B	19775844	19777736	Kinase family protein
	TRINITY_DN437_c2_g1	9.01088	2.29e-35	2.97e-32	UP	TRINITY_DN437_c2_g1	TraesCS5D01G093900.1	263	335	1944	8.88e-22	TraesCS5D01G093900	chr5D	103213394	103216909	70 kDa heat shock protein
	TRINITY_DN45360_c0_g1	9.00645	1.04e-10	3.48e-09	UP	TRINITY_DN45360_c0_g1	TraesCS6A01G000200.1	2408	2748	2748	5.67e-112	TraesCS6A01G000200	chr6A	103455	110107	Receptor-like protein kinase
	TRINITY_DN70315_c0_g1	9.00645	1.04e-10	3.48e-09	UP	TRINITY_DN70315_c0_g1	TraesCS7D01G517500.2	23	274	1575	1.52e-130	TraesCS7D01G517500	chr7D	616273649	616277059	F-box family protein
	TRINITY_DN171853_c0_g1	9.00465	1.07e-10	3.58e-09	UP	NA	NA	NA	NA	NA	NA	NA	NA	NA	NA	NA
	TRINITY_DN21289_c0_g2	9.00455	2.8e-09	7.54e-08	UP	TRINITY_DN21289_c0_g2	TraesCS2D01G035700.1	1321	1425	1425	6.24e-42	TraesCS2D01G035700	chr2D	13588413	13590974	UNC93-like protein 2
	TRINITY_DN35502_c0_g1	9.00424	1.73e-08	4.15e-07	UP	TRINITY_DN35502_c0_g1	TraesCS2D01G026900.1	1	135	1506	6.31e-59	TraesCS2D01G026900	chr2D	11312696	11314682	Glutamyl-tRNA (Gln) amidotransferase subunit A
	TRINITY_DN1201_c2_g1	9.00406	1.08e-07	2.29e-06	UP	NA	NA	NA	NA	NA	NA	NA	NA	NA	NA	NA
	TRINITY_DN61580_c0_g2	9.0036	2.26e-10	7.21e-09	UP	NA	NA	NA	NA	NA	NA	NA	NA	NA	NA	NA
	TRINITY_DN26812_c0_g1	9.0032	4.3e-10	1.32e-08	UP	NA	NA	NA	NA	NA	NA	NA	NA	NA	NA	NA
	TRINITY_DN40164_c2_g1	9.00214	8.27e-08	1.78e-06	UP	NA	NA	NA	NA	NA	NA	NA	NA	NA	NA	NA
	TRINITY_DN14865_c0_g3	9.00207	1.33e-10	4.36e-09	UP	TRINITY_DN14865_c0_g3	TraesCS2D01G042200.1	577	1525	3180	0	TraesCS2D01G042200	chr2D	15113231	15116657	Disease resistance protein
	TRINITY_DN76492_c0_g3	9.00105	1.24e-10	4.09e-09	UP	TRINITY_DN76492_c0_g3	TraesCS1A01G322500.1	43	197	525	2.28e-24	TraesCS1A01G322500	chr1A	512947133	512947744	GRF zinc finger family protein
	TRINITY_DN36369_c0_g3	9.00026	1.33e-10	4.36e-09	UP	NA	NA	NA	NA	NA	NA	NA	NA	NA	NA	NA
	TRINITY_DN101890_c0_g2	9.0001	1.98e-06	3.31e-05	UP	NA	NA	NA	NA	NA	NA	NA	NA	NA	NA	NA
	TRINITY_DN50148_c2_g1	8.99924	1.5e-10	4.89e-09	UP	NA	NA	NA	NA	NA	NA	NA	NA	NA	NA	NA
	TRINITY_DN262230_c0_g1	8.99818	2.69e-07	5.35e-06	UP	NA	NA	NA	NA	NA	NA	NA	NA	NA	NA	NA
	TRINITY_DN8141_c0_g3	8.99665	1.25e-10	4.13e-09	UP	TRINITY_DN8141_c0_g3	TraesCS2A01G361100.2	894	851	894	6.29e-13	TraesCS2A01G361100	chr2A	605164949	605171281	Disease resistance protein (NBS-LRR class) family
	TRINITY_DN52850_c0_g3	8.99485	4.81e-09	1.25e-07	UP	TRINITY_DN52850_c0_g3	TraesCS1B01G429900.1	158	389	510	6.1e-56	TraesCS1B01G429900	chr1B	654382537	654385302	Phytoene synthase
	TRINITY_DN27604_c0_g2	8.99406	1.86e-10	6.02e-09	UP	TRINITY_DN27604_c0_g2	TraesCS2B01G113100.1	1	807	807	0	TraesCS2B01G113100	chr2B	76488184	76488990	Chaperone protein ClpB
	TRINITY_DN25393_c0_g2	8.99254	1.22e-09	3.48e-08	UP	NA	NA	NA	NA	NA	NA	NA	NA	NA	NA	NA
	TRINITY_DN34576_c0_g4	8.99154	4.57e-10	1.39e-08	UP	TRINITY_DN34576_c0_g4	TraesCS2A01G238000.1	651	681	1626	1.64e-07	TraesCS2A01G238000	chr2A	319022016	319052442	Folate/biopterin transporter family protein, expressed
	TRINITY_DN25944_c1_g4	8.99042	1.53e-10	5e-09	UP	TRINITY_DN25944_c1_g4	TraesCS4A01G467900.1	1032	1182	1182	2.07e-72	TraesCS4A01G467900	chr4A	729819252	729820433	F-box protein
	TRINITY_DN17196_c0_g2	8.99011	3.89e-10	1.2e-08	UP	TRINITY_DN17196_c0_g2	TraesCS7D01G476100.1	920	966	2397	2.46e-16	TraesCS7D01G476100	chr7D	587839169	587845613	Glutamine--tRNA ligase
	TRINITY_DN37819_c0_g1	8.98943	5.24e-07	9.86e-06	UP	NA	NA	NA	NA	NA	NA	NA	NA	NA	NA	NA
	TRINITY_DN31243_c0_g1	8.9886	1.56e-10	5.08e-09	UP	TRINITY_DN31243_c0_g1	TraesCS2B01G076400.1	366	763	1188	0	TraesCS2B01G076400	chr2B	41381179	41382545	2-oxoglutarate (2OG) and Fe(II)-dependent oxygenase superfamily protein
	TRINITY_DN47117_c0_g1	8.98837	1.99e-06	3.32e-05	UP	NA	NA	NA	NA	NA	NA	NA	NA	NA	NA	NA
	TRINITY_DN43279_c0_g2	8.98826	5.37e-10	1.62e-08	UP	NA	NA	NA	NA	NA	NA	NA	NA	NA	NA	NA
	TRINITY_DN28418_c0_g2	8.98786	3.27e-10	1.02e-08	UP	NA	NA	NA	NA	NA	NA	NA	NA	NA	NA	NA
	TRINITY_DN62324_c0_g2	8.98786	3.27e-10	1.02e-08	UP	NA	NA	NA	NA	NA	NA	NA	NA	NA	NA	NA
	TRINITY_DN32596_c0_g2	8.98352	7.73e-10	2.27e-08	UP	TRINITY_DN32596_c0_g2	TraesCS7A01G376500.3	2256	2018	2463	2.44e-118	TraesCS7A01G376500	chr7A	549528066	549531175	Phospholipase D
	TRINITY_DN37339_c0_g1	8.98313	1.56e-10	5.09e-09	UP	TRINITY_DN37339_c0_g1	TraesCS1D01G417600.1	21	64	3819	9.31e-07	TraesCS1D01G417600	chr1D	475723391	475731263	Ubiquitin ligase protein cop1, putative isoform 1
	TRINITY_DN52841_c1_g1	8.98079	1.75e-08	4.21e-07	UP	NA	NA	NA	NA	NA	NA	NA	NA	NA	NA	NA
	TRINITY_DN89854_c0_g1	8.97887	1.35e-08	3.29e-07	UP	NA	NA	NA	NA	NA	NA	NA	NA	NA	NA	NA
	TRINITY_DN82219_c0_g1	8.97764	2.19e-10	7.02e-09	UP	NA	NA	NA	NA	NA	NA	NA	NA	NA	NA	NA
	TRINITY_DN67899_c0_g1	8.97694	9.92e-09	2.47e-07	UP	NA	NA	NA	NA	NA	NA	NA	NA	NA	NA	NA
	TRINITY_DN201_c1_g1	8.97562	1.04e-06	1.84e-05	UP	NA	NA	NA	NA	NA	NA	NA	NA	NA	NA	NA
	TRINITY_DN31919_c0_g1	8.97359	2.59e-07	5.16e-06	UP	TRINITY_DN31919_c0_g1	TraesCS2B01G622700.1	2854	3079	4917	8.36e-108	TraesCS2B01G622700	chr2B	796800188	796808905	RING/FYVE/PHD zinc finger protein
	TRINITY_DN26446_c0_g1	8.97238	2.67e-10	8.46e-09	UP	TRINITY_DN26446_c0_g1	TraesCS2B01G019500.1	536	590	669	1.29e-20	TraesCS2B01G019500	chr2B	9016407	9034079	RING/U-box superfamily protein
	TRINITY_DN21277_c0_g1	8.97023	4.54e-10	1.38e-08	UP	NA	NA	NA	NA	NA	NA	NA	NA	NA	NA	NA
	TRINITY_DN248070_c0_g1	8.96929	3e-09	8.05e-08	UP	TRINITY_DN248070_c0_g1	TraesCS7A01G479600.1	1175	1239	1239	1.02e-24	TraesCS7A01G479600	chr7A	672014228	672016174	Ureide permease-like protein
	TRINITY_DN73702_c0_g2	8.96929	3e-09	8.05e-08	UP	TRINITY_DN73702_c0_g2	TraesCS7A01G386700.1	1	45	3162	1.97e-15	TraesCS7A01G386700	chr7A	562272493	562282831	Replication factor C subunit
	TRINITY_DN22748_c0_g1	8.96795	5.27e-10	1.59e-08	UP	TRINITY_DN22748_c0_g1	TraesCS7D01G302600.1	317	410	1164	8.34e-43	TraesCS7D01G302600	chr7D	382739410	382742867	Inositol 2-dehydrogenase-like protein
	TRINITY_DN34362_c0_g2	8.96795	5.27e-10	1.59e-08	UP	TRINITY_DN34362_c0_g2	TraesCS7B01G417300.1	479	633	1905	8.73e-22	TraesCS7B01G417300	chr7B	685207903	685210161	Disease resistance protein (NBS-LRR class) family
	TRINITY_DN70465_c2_g1	8.96764	2.32e-10	7.41e-09	UP	NA	NA	NA	NA	NA	NA	NA	NA	NA	NA	NA
	TRINITY_DN30445_c0_g4	8.96701	3.49e-09	9.27e-08	UP	TRINITY_DN30445_c0_g4	TraesCS6A01G027800.1	403	758	897	7.51e-92	TraesCS6A01G027800	chr6A	14180560	14181777	downstream target of AGL15 2
	TRINITY_DN1899_c2_g1	8.96466	3.66e-07	7.1e-06	UP	TRINITY_DN1899_c2_g1	TraesCS6D01G064300.1	720	922	1848	2.07e-103	TraesCS6D01G064300	chr6D	30245405	30248545	Beta-fructofuranosidase, insoluble protein
	TRINITY_DN200208_c0_g1	8.9646	1.05e-09	3.02e-08	UP	NA	NA	NA	NA	NA	NA	NA	NA	NA	NA	NA
	TRINITY_DN34861_c0_g1	8.96422	3.95e-10	1.21e-08	UP	TRINITY_DN34861_c0_g1	TraesCS2A01G030000.1	1986	2917	3285	0	TraesCS2A01G030000	chr2A	13811892	13815254	NBS-LRR-like resistance protein
	TRINITY_DN124277_c0_g3	8.9627	1.4e-09	3.95e-08	UP	NA	NA	NA	NA	NA	NA	NA	NA	NA	NA	NA
	TRINITY_DN14849_c0_g3	8.96235	3.41e-10	1.06e-08	UP	TRINITY_DN14849_c0_g3	TraesCS3B01G000200.1	1808	1911	1911	1.29e-39	TraesCS3B01G000200	chr3B	218049	221886	Protein EXECUTER 1, chloroplastic
	TRINITY_DN27637_c0_g1	8.96235	3.41e-10	1.06e-08	UP	NA	NA	NA	NA	NA	NA	NA	NA	NA	NA	NA
	TRINITY_DN11196_c6_g1	8.95928	1.47e-08	3.56e-07	UP	TRINITY_DN11196_c6_g1	TraesCS6A01G052500.1	3545	3822	4287	8.35e-99	TraesCS6A01G052500	chr6A	27099974	27108778	NBS-LRR-like resistance protein
	TRINITY_DN14219_c0_g4	8.95862	2.75e-10	8.69e-09	UP	NA	NA	NA	NA	NA	NA	NA	NA	NA	NA	NA
	TRINITY_DN43615_c2_g1	8.95831	6.21e-10	1.86e-08	UP	NA	NA	NA	NA	NA	NA	NA	NA	NA	NA	NA
	TRINITY_DN160971_c0_g1	8.95306	1.02e-08	2.54e-07	UP	TRINITY_DN160971_c0_g1	TraesCS7D01G495500.1	104	48	864	5.11e-10	TraesCS7D01G495500	chr7D	602409393	602410256	Chaperone protein dnaJ
	TRINITY_DN56207_c0_g1	8.95262	1.48e-09	4.14e-08	UP	TRINITY_DN56207_c0_g1	TraesCS7B01G452700.1	1202	1263	1263	1.54e-14	TraesCS7B01G452700	chr7B	714316182	714317444	F-box domain containing protein
	TRINITY_DN29349_c0_g2	8.95111	7.56e-09	1.91e-07	UP	TRINITY_DN29349_c0_g2	TraesCS7D01G545800.1	3645	3954	3954	2.76e-162	TraesCS7D01G545800	chr7D	632801275	632820118	receptor kinase 1
	TRINITY_DN29297_c0_g1	8.95037	3.84e-10	1.19e-08	UP	TRINITY_DN29297_c0_g1	TraesCS7D01G463000.1	1	878	1065	0	TraesCS7D01G463000	chr7D	578177833	578179047	Auxin response factor
	TRINITY_DN181547_c0_g1	8.94665	1.49e-07	3.09e-06	UP	NA	NA	NA	NA	NA	NA	NA	NA	NA	NA	NA
	TRINITY_DN14344_c2_g1	8.94556	3.41e-10	1.06e-08	UP	TRINITY_DN14344_c2_g1	TraesCS3A01G009200.2	2942	3081	3081	5.39e-68	TraesCS3A01G009200	chr3A	8321632	8329985	NBS-LRR-like resistance protein
	TRINITY_DN22733_c4_g1	8.94556	3.41e-10	1.06e-08	UP	TRINITY_DN22733_c4_g1	TraesCSU01G012800.1	4060	4305	4305	7.83e-127	TraesCSU01G012800	chrUn	15965004	15969308	NBS-LRR disease resistance protein-like protein
	TRINITY_DN19680_c0_g2	8.94367	3.9e-10	1.2e-08	UP	NA	NA	NA	NA	NA	NA	NA	NA	NA	NA	NA
	TRINITY_DN16116_c0_g3	8.94179	4.92e-10	1.49e-08	UP	TRINITY_DN16116_c0_g3	TraesCS6B01G464400.1	1478	1881	2259	2.05e-111	TraesCS6B01G464400	chr6B	715976013	715980262	Disease resistance protein RPM1
	TRINITY_DN16614_c0_g3	8.94099	3.2e-10	1e-08	UP	NA	NA	NA	NA	NA	NA	NA	NA	NA	NA	NA
	TRINITY_DN94876_c0_g1	8.94099	3.2e-10	1e-08	UP	NA	NA	NA	NA	NA	NA	NA	NA	NA	NA	NA
	TRINITY_DN26065_c0_g1	8.93722	3.54e-10	1.1e-08	UP	NA	NA	NA	NA	NA	NA	NA	NA	NA	NA	NA
	TRINITY_DN46959_c0_g1	8.9364	3.96e-10	1.22e-08	UP	TRINITY_DN46959_c0_g1	TraesCS7B01G477800.1	1059	1439	1569	6.41e-146	TraesCS7B01G477800	chr7B	733355074	733357049	Transposon protein, putative, CACTA, En/Spm sub-class, expressed
	TRINITY_DN80169_c0_g1	8.9364	3.96e-10	1.22e-08	UP	NA	NA	NA	NA	NA	NA	NA	NA	NA	NA	NA
	TRINITY_DN18039_c0_g7	8.93533	3.89e-10	1.2e-08	UP	NA	NA	NA	NA	NA	NA	NA	NA	NA	NA	NA
	TRINITY_DN89968_c2_g1	8.93416	1.18e-09	3.37e-08	UP	TRINITY_DN89968_c2_g1	TraesCS6B01G464400.1	1289	1566	2259	6.29e-110	TraesCS6B01G464400	chr6B	715976013	715980262	Disease resistance protein RPM1
	TRINITY_DN45219_c0_g1	8.93344	4.4e-10	1.35e-08	UP	TRINITY_DN45219_c0_g1	TraesCS2A01G047500.1	256	336	345	2.17e-25	TraesCS2A01G047500	chr2A	18414109	18414453	Flowering-promoting factor 1-like protein 1
	TRINITY_DN87514_c1_g2	8.93344	4.4e-10	1.35e-08	UP	NA	NA	NA	NA	NA	NA	NA	NA	NA	NA	NA
	TRINITY_DN31057_c0_g1	8.93262	3.58e-10	1.11e-08	UP	NA	NA	NA	NA	NA	NA	NA	NA	NA	NA	NA
	TRINITY_DN25758_c0_g3	8.93236	6.7e-07	1.24e-05	UP	NA	NA	NA	NA	NA	NA	NA	NA	NA	NA	NA
	TRINITY_DN149381_c0_g1	8.93077	1.11e-08	2.74e-07	UP	TRINITY_DN149381_c0_g1	TraesCS5D01G285700.1	622	686	1158	1.25e-26	TraesCS5D01G285700	chr5D	386150721	386152068	Cytochrome b561 and DOMON domain-containing protein
	TRINITY_DN222006_c0_g1	8.9303	2.7e-06	4.38e-05	UP	TRINITY_DN222006_c0_g1	TraesCS6D01G396700.1	934	1217	4260	2.02e-25	TraesCS6D01G396700	chr6D	468910372	468914734	Disease resistance protein (NBS-LRR class) family
	TRINITY_DN120324_c0_g1	8.92847	6.28e-08	1.39e-06	UP	NA	NA	NA	NA	NA	NA	NA	NA	NA	NA	NA
	TRINITY_DN39816_c0_g1	8.92847	6.28e-08	1.39e-06	UP	TRINITY_DN39816_c0_g1	TraesCS2D01G525500.1	481	381	888	5.32e-44	TraesCS2D01G525500	chr2D	613432142	613435420	Shikimate kinase
	TRINITY_DN17219_c0_g6	8.92802	5.51e-10	1.66e-08	UP	TRINITY_DN17219_c0_g6	TraesCS2B01G018200.1	3123	3524	4269	1.51e-147	TraesCS2B01G018200	chr2B	8385588	8389997	NBS-LRR disease resistance protein-like protein
	TRINITY_DN57423_c2_g1	8.92732	1.65e-09	4.58e-08	UP	NA	NA	NA	NA	NA	NA	NA	NA	NA	NA	NA
	TRINITY_DN75547_c0_g1	8.92628	2.75e-07	5.47e-06	UP	NA	NA	NA	NA	NA	NA	NA	NA	NA	NA	NA
	TRINITY_DN10623_c1_g1	8.92442	5.55e-09	1.42e-07	UP	NA	NA	NA	NA	NA	NA	NA	NA	NA	NA	NA
	TRINITY_DN24534_c0_g3	8.92386	1.27e-09	3.6e-08	UP	NA	NA	NA	NA	NA	NA	NA	NA	NA	NA	NA
	TRINITY_DN58317_c0_g1	8.92386	1.27e-09	3.6e-08	UP	TRINITY_DN58317_c0_g1	TraesCS4B01G371100.1	1063	1342	3918	2.18e-139	TraesCS4B01G371100	chr4B	656878921	656882838	Disease resistance protein (NBS-LRR class) family
	TRINITY_DN31127_c0_g1	8.9223	4.37e-10	1.34e-08	UP	TRINITY_DN31127_c0_g1	TraesCS7D01G550400.1	771	1172	1344	0	TraesCS7D01G550400	chr7D	634659567	634660910	F-box family protein
	TRINITY_DN38516_c1_g3	8.9223	4.37e-10	1.34e-08	UP	NA	NA	NA	NA	NA	NA	NA	NA	NA	NA	NA
	TRINITY_DN10855_c0_g2	8.91894	2.82e-09	7.59e-08	UP	NA	NA	NA	NA	NA	NA	NA	NA	NA	NA	NA
	TRINITY_DN236062_c0_g1	8.91849	4.65e-10	1.42e-08	UP	NA	NA	NA	NA	NA	NA	NA	NA	NA	NA	NA
	TRINITY_DN113709_c0_g1	8.91737	8.75e-10	2.55e-08	UP	TRINITY_DN113709_c0_g1	TraesCS7A01G557400.1	3041	3099	3099	1.74e-21	TraesCS7A01G557400	chr7A	729935833	729941928	Protein argonaute
	TRINITY_DN71119_c0_g1	8.91383	5.71e-10	1.72e-08	UP	TRINITY_DN71119_c0_g1	TraesCS2A01G315200.1	1	433	489	0	TraesCS2A01G315200	chr2A	540843441	540843929	Protein FAR1-RELATED SEQUENCE 5
	TRINITY_DN44688_c0_g1	8.91274	5.71e-10	1.71e-08	UP	NA	NA	NA	NA	NA	NA	NA	NA	NA	NA	NA
	TRINITY_DN49354_c0_g1	8.91154	1.76e-09	4.87e-08	UP	NA	NA	NA	NA	NA	NA	NA	NA	NA	NA	NA
	TRINITY_DN5652_c0_g2	8.91053	4.65e-09	1.21e-07	UP	NA	NA	NA	NA	NA	NA	NA	NA	NA	NA	NA
	TRINITY_DN16382_c2_g1	8.91011	2.55e-08	5.99e-07	UP	TRINITY_DN16382_c2_g1	TraesCS2D01G125900.1	1	195	918	1.06e-98	TraesCS2D01G125900	chr2D	73312058	73313069	Short-chain dehydrogenase/reductase
	TRINITY_DN67579_c0_g1	8.90807	5.17e-10	1.57e-08	UP	NA	NA	NA	NA	NA	NA	NA	NA	NA	NA	NA
	TRINITY_DN36145_c0_g1	8.90726	8.99e-10	2.61e-08	UP	NA	NA	NA	NA	NA	NA	NA	NA	NA	NA	NA
	TRINITY_DN29659_c0_g1	8.90695	9.65e-10	2.79e-08	UP	TRINITY_DN29659_c0_g1	TraesCS6B01G119500.2	582	856	1035	2.75e-143	TraesCS6B01G119500	chr6B	114157501	114161192	Transmembrane protein, putative
	TRINITY_DN46580_c0_g1	8.905	1.18e-09	3.36e-08	UP	TRINITY_DN46580_c0_g1	TraesCS7D01G546800.1	1143	1230	1230	2.72e-39	TraesCS7D01G546800	chr7D	633393377	633394606	F-box domain containing protein
	TRINITY_DN36118_c0_g1	8.90461	2.34e-09	6.39e-08	UP	NA	NA	NA	NA	NA	NA	NA	NA	NA	NA	NA
	TRINITY_DN5609_c1_g7	8.90405	3.26e-08	7.56e-07	UP	NA	NA	NA	NA	NA	NA	NA	NA	NA	NA	NA
	TRINITY_DN19271_c0_g2	8.90305	1.48e-09	4.14e-08	UP	TRINITY_DN19271_c0_g2	TraesCS7D01G507900.1	160	378	1434	1.35e-105	TraesCS7D01G507900	chr7D	611748101	611752058	Purple acid phosphatase
	TRINITY_DN43896_c0_g1	8.90145	6.63e-10	1.97e-08	UP	NA	NA	NA	NA	NA	NA	NA	NA	NA	NA	NA
	TRINITY_DN75365_c0_g1	8.90068	1.53e-09	4.28e-08	UP	NA	NA	NA	NA	NA	NA	NA	NA	NA	NA	NA
	TRINITY_DN14987_c0_g3	8.90035	7.34e-10	2.16e-08	UP	NA	NA	NA	NA	NA	NA	NA	NA	NA	NA	NA
	TRINITY_DN56335_c0_g2	8.89645	9.97e-10	2.87e-08	UP	NA	NA	NA	NA	NA	NA	NA	NA	NA	NA	NA
	TRINITY_DN17220_c0_g1	8.89588	1.37e-07	2.87e-06	UP	NA	NA	NA	NA	NA	NA	NA	NA	NA	NA	NA
	TRINITY_DN18592_c0_g2	8.89481	1.01e-09	2.9e-08	UP	TRINITY_DN18592_c0_g2	TraesCS7D01G381900.1	661	789	789	7.74e-62	TraesCS7D01G381900	chr7D	495851549	495853059	Kinase family protein
	TRINITY_DN138505_c0_g1	8.89304	2.76e-06	4.46e-05	UP	NA	NA	NA	NA	NA	NA	NA	NA	NA	NA	NA
	TRINITY_DN28556_c0_g2	8.89152	4.7e-08	1.06e-06	UP	NA	NA	NA	NA	NA	NA	NA	NA	NA	NA	NA
	TRINITY_DN23927_c1_g1	8.88895	2.81e-07	5.57e-06	UP	NA	NA	NA	NA	NA	NA	NA	NA	NA	NA	NA
	TRINITY_DN24197_c0_g2	8.88817	1.66e-09	4.62e-08	UP	TRINITY_DN24197_c0_g2	TraesCS7B01G312600.1	1	127	1722	2.5e-44	TraesCS7B01G312600	chr7B	558363481	558365994	Peptide transporter, putative
	TRINITY_DN68373_c0_g1	8.88817	1.66e-09	4.62e-08	UP	NA	NA	NA	NA	NA	NA	NA	NA	NA	NA	NA
	TRINITY_DN18706_c1_g1	8.88712	3.55e-08	8.17e-07	UP	TRINITY_DN18706_c1_g1	TraesCS6D01G050600.3	76	520	2019	1.92e-138	TraesCS6D01G050600	chr6D	24345449	24358105	Leucine-rich repeat receptor-like protein kinase family protein
	TRINITY_DN78667_c0_g1	8.887	7.53e-10	2.21e-08	UP	NA	NA	NA	NA	NA	NA	NA	NA	NA	NA	NA
	TRINITY_DN44736_c0_g1	8.88505	2.3e-08	5.44e-07	UP	NA	NA	NA	NA	NA	NA	NA	NA	NA	NA	NA
	TRINITY_DN160793_c0_g1	8.88505	7.51e-10	2.21e-08	UP	NA	NA	NA	NA	NA	NA	NA	NA	NA	NA	NA
	TRINITY_DN30463_c0_g1	8.88304	2.08e-08	4.93e-07	UP	NA	NA	NA	NA	NA	NA	NA	NA	NA	NA	NA
	TRINITY_DN47522_c0_g1	8.88304	2.08e-08	4.93e-07	UP	NA	NA	NA	NA	NA	NA	NA	NA	NA	NA	NA
	TRINITY_DN76359_c0_g1	8.87859	6.56e-08	1.44e-06	UP	TRINITY_DN76359_c0_g1	TraesCS3A01G505600.1	1	148	2379	8.35e-73	TraesCS3A01G505600	chr3A	727397644	727400541	Disease resistance protein RPM1
	TRINITY_DN20679_c0_g3	8.87795	2.79e-09	7.53e-08	UP	NA	NA	NA	NA	NA	NA	NA	NA	NA	NA	NA
	TRINITY_DN112570_c0_g1	8.87491	6.84e-09	1.74e-07	UP	TRINITY_DN112570_c0_g1	TraesCS3D01G023800.1	183	293	849	5.22e-43	TraesCS3D01G023800	chr3D	7553540	7554681	Dehydration responsive factor 1 variant 1
	TRINITY_DN65984_c0_g2	8.87438	9.03e-10	2.62e-08	UP	NA	NA	NA	NA	NA	NA	NA	NA	NA	NA	NA
	TRINITY_DN57107_c0_g1	8.87393	4.8e-09	1.25e-07	UP	TRINITY_DN57107_c0_g1	TraesCS3B01G000700.1	1	232	1617	1.42e-51	TraesCS3B01G000700	chr3B	981837	986675	1-deoxy-D-xylulose 5-phosphate reductoisomerase
	TRINITY_DN10944_c1_g1	8.87288	5.3e-09	1.36e-07	UP	NA	NA	NA	NA	NA	NA	NA	NA	NA	NA	NA
	TRINITY_DN4219_c4_g3	8.86925	2.37e-09	6.47e-08	UP	TRINITY_DN4219_c4_g3	TraesCS7A01G005100.1	396	585	3423	1.57e-77	TraesCS7A01G005100	chr7A	2694421	2700489	NBS-LRR disease resistance protein, putative
	TRINITY_DN93405_c1_g1	8.86577	1.75e-08	4.22e-07	UP	NA	NA	NA	NA	NA	NA	NA	NA	NA	NA	NA
	TRINITY_DN63769_c0_g2	8.86449	1.4e-09	3.94e-08	UP	NA	NA	NA	NA	NA	NA	NA	NA	NA	NA	NA
	TRINITY_DN28687_c0_g2	8.8642	9.26e-09	2.31e-07	UP	TRINITY_DN28687_c0_g2	TraesCS7D01G545800.1	678	1762	3954	0	TraesCS7D01G545800	chr7D	632801275	632820118	receptor kinase 1
	TRINITY_DN55305_c0_g2	8.86169	3.68e-08	8.44e-07	UP	NA	NA	NA	NA	NA	NA	NA	NA	NA	NA	NA
	TRINITY_DN83424_c0_g1	8.86011	5.58e-09	1.43e-07	UP	NA	NA	NA	NA	NA	NA	NA	NA	NA	NA	NA
	TRINITY_DN5142_c0_g4	8.85966	1.13e-09	3.23e-08	UP	TRINITY_DN5142_c0_g4	TraesCS7A01G021700.1	1	300	3324	6.22e-157	TraesCS7A01G021700	chr7A	8775286	8780950	Disease resistance protein (NBS-LRR class) family
	TRINITY_DN29209_c0_g1	8.85746	7.07e-08	1.54e-06	UP	NA	NA	NA	NA	NA	NA	NA	NA	NA	NA	NA
	TRINITY_DN51561_c0_g2	8.85706	1.32e-08	3.23e-07	UP	TRINITY_DN51561_c0_g2	TraesCS3A01G014600.1	2751	2868	2868	1.26e-55	TraesCS3A01G014600	chr3A	10144264	10148306	Disease resistance protein
	TRINITY_DN51568_c0_g1	8.85646	3.24e-09	8.65e-08	UP	NA	NA	NA	NA	NA	NA	NA	NA	NA	NA	NA
	TRINITY_DN104883_c0_g1	8.85481	1.38e-09	3.9e-08	UP	TRINITY_DN104883_c0_g1	TraesCS7D01G518700.1	230	590	1458	0	TraesCS7D01G518700	chr7D	617027273	617029580	F-box family protein
	TRINITY_DN109633_c0_g1	8.85481	1.38e-09	3.9e-08	UP	TRINITY_DN109633_c0_g1	TraesCS7D01G423200.1	232	10	2391	1.76e-114	TraesCS7D01G423200	chr7D	543624748	543627138	Serine/threonine-protein kinase
	TRINITY_DN23752_c0_g2	8.85481	1.38e-09	3.9e-08	UP	NA	NA	NA	NA	NA	NA	NA	NA	NA	NA	NA
	TRINITY_DN46667_c0_g1	8.8548	2.84e-06	4.58e-05	UP	NA	NA	NA	NA	NA	NA	NA	NA	NA	NA	NA
	TRINITY_DN60340_c0_g2	8.85402	3.11e-09	8.32e-08	UP	TRINITY_DN60340_c0_g2	TraesCS7A01G005100.2	70	669	3567	0	TraesCS7A01G005100	chr7A	2694421	2700489	NBS-LRR disease resistance protein, putative
	TRINITY_DN47611_c0_g3	8.85166	1.83e-09	5.06e-08	UP	TRINITY_DN47611_c0_g3	TraesCS3A01G505600.1	1678	2154	2379	0	TraesCS3A01G505600	chr3A	727397644	727400541	Disease resistance protein RPM1
	TRINITY_DN28056_c0_g1	8.85083	3.5e-08	8.07e-07	UP	TRINITY_DN28056_c0_g1	TraesCS5A01G536100.1	1	86	522	9.01e-30	TraesCS5A01G536100	chr5A	692545190	692552924	Zinc finger (CCCH-type/C3HC4-type RING finger) family protein
	TRINITY_DN111963_c0_g2	8.85051	1.63e-06	2.79e-05	UP	TRINITY_DN111963_c0_g2	TraesCS4D01G253200.1	458	735	735	8.83e-105	TraesCS4D01G253200	chr4D	421950800	421952319	Cyclin
	TRINITY_DN90707_c0_g1	8.84873	4.9e-08	1.11e-06	UP	TRINITY_DN90707_c0_g1	TraesCS4A01G163000.1	3218	3285	3354	1.73e-16	TraesCS4A01G163000	chr4A	362065937	362113687	Ubiquitin carboxyl-terminal hydrolase family protein, expressed
	TRINITY_DN47347_c0_g1	8.84828	9.64e-09	2.4e-07	UP	NA	NA	NA	NA	NA	NA	NA	NA	NA	NA	NA
	TRINITY_DN241548_c0_g1	8.84796	1.98e-09	5.45e-08	UP	TRINITY_DN241548_c0_g1	TraesCS6D01G343300.1	1026	623	1290	0	TraesCS6D01G343300	chr6D	442158501	442160707	P-loop containing nucleoside triphosphate hydrolases superfamily protein
	TRINITY_DN30257_c0_g1	8.84762	2.68e-09	7.26e-08	UP	TRINITY_DN30257_c0_g1	TraesCS2D01G567200.1	1394	2205	2205	0	TraesCS2D01G567200	chr2D	635799856	635803014	NBS-LRR disease resistance protein
	TRINITY_DN39086_c0_g4	8.84519	5.2e-09	1.34e-07	UP	NA	NA	NA	NA	NA	NA	NA	NA	NA	NA	NA
	TRINITY_DN107703_c0_g1	8.84192	5.44e-07	1.02e-05	UP	NA	NA	NA	NA	NA	NA	NA	NA	NA	NA	NA
	TRINITY_DN16063_c0_g3	8.83943	7.88e-09	1.99e-07	UP	TRINITY_DN16063_c0_g3	TraesCS3D01G223700.1	371	149	645	1.02e-112	TraesCS3D01G223700	chr3D	305322148	305322918	MYB transcription factor
	TRINITY_DN29000_c0_g3	8.83906	3.03e-09	8.13e-08	UP	TRINITY_DN29000_c0_g3	TraesCS6B01G464400.1	1793	2157	2259	5.39e-127	TraesCS6B01G464400	chr6B	715976013	715980262	Disease resistance protein RPM1
	TRINITY_DN69044_c0_g1	8.83906	3.03e-09	8.13e-08	UP	NA	NA	NA	NA	NA	NA	NA	NA	NA	NA	NA
	TRINITY_DN27389_c0_g1	8.83872	2.55e-09	6.93e-08	UP	NA	NA	NA	NA	NA	NA	NA	NA	NA	NA	NA
	TRINITY_DN14142_c1_g1	8.83792	5.4e-08	1.21e-06	UP	TRINITY_DN14142_c1_g1	TraesCS6D01G028700.1	613	1014	2793	1.21e-98	TraesCS6D01G028700	chr6D	11069121	11074665	Protein kinase family protein
	TRINITY_DN33443_c0_g2	8.83787	1.69e-09	4.71e-08	UP	NA	NA	NA	NA	NA	NA	NA	NA	NA	NA	NA
	TRINITY_DN76311_c0_g1	8.83735	1.06e-08	2.61e-07	UP	NA	NA	NA	NA	NA	NA	NA	NA	NA	NA	NA
	TRINITY_DN44668_c0_g1	8.83596	4.08e-07	7.84e-06	UP	NA	NA	NA	NA	NA	NA	NA	NA	NA	NA	NA
	TRINITY_DN45217_c1_g1	8.83463	3.82e-09	1.01e-07	UP	TRINITY_DN45217_c1_g1	TraesCS3B01G369700.1	440	510	1929	6.37e-28	TraesCS3B01G369700	chr3B	581702512	581710090	Type I inositol-1,4,5-trisphosphate 5-phosphatase CVP2
	TRINITY_DN59640_c0_g4	8.83382	1.9e-09	5.24e-08	UP	TRINITY_DN59640_c0_g4	TraesCS7D01G526200.1	1	665	1074	0	TraesCS7D01G526200	chr7D	621659263	621665345	Receptor-like protein kinase
	TRINITY_DN77862_c1_g1	8.83296	2.33e-09	6.37e-08	UP	TRINITY_DN77862_c1_g1	TraesCS3D01G009200.1	196	438	660	3.33e-92	TraesCS3D01G009200	chr3D	3088068	3089389	basic helix-loop-helix (bHLH) DNA-binding superfamily protein
	TRINITY_DN101837_c0_g1	8.82975	2.56e-09	6.95e-08	UP	NA	NA	NA	NA	NA	NA	NA	NA	NA	NA	NA
	TRINITY_DN27077_c0_g1	8.82889	2.13e-09	5.86e-08	UP	NA	NA	NA	NA	NA	NA	NA	NA	NA	NA	NA
	TRINITY_DN44864_c0_g2	8.82565	3.57e-09	9.46e-08	UP	TRINITY_DN44864_c0_g2	TraesCS7D01G542200.1	2550	3501	4110	0	TraesCS7D01G542200	chr7D	631424356	631428465	NBS-LRR disease resistance protein-like protein
	TRINITY_DN73181_c0_g1	8.82072	2.72e-09	7.36e-08	UP	NA	NA	NA	NA	NA	NA	NA	NA	NA	NA	NA
	TRINITY_DN26499_c2_g1	8.82002	1.04e-06	1.85e-05	UP	NA	NA	NA	NA	NA	NA	NA	NA	NA	NA	NA
	TRINITY_DN14095_c2_g2	8.81806	1.42e-07	2.96e-06	UP	TRINITY_DN14095_c2_g2	TraesCS4D01G165900.1	53	118	681	3.29e-22	TraesCS4D01G165900	chr4D	278249361	278250750	Protein FAR1-RELATED SEQUENCE 5
	TRINITY_DN11475_c0_g2	8.81698	5.6e-09	1.43e-07	UP	NA	NA	NA	NA	NA	NA	NA	NA	NA	NA	NA
	TRINITY_DN58016_c0_g1	8.81698	5.6e-09	1.43e-07	UP	NA	NA	NA	NA	NA	NA	NA	NA	NA	NA	NA
	TRINITY_DN68278_c0_g1	8.81491	4.79e-09	1.24e-07	UP	NA	NA	NA	NA	NA	NA	NA	NA	NA	NA	NA
	TRINITY_DN33495_c0_g1	8.81369	2.74e-09	7.4e-08	UP	TRINITY_DN33495_c0_g1	TraesCS1B01G148300.1	1	170	366	2.51e-61	TraesCS1B01G148300	chr1B	216473675	216474040	Major facilitator superfamily protein
	TRINITY_DN194163_c0_g1	8.81348	4.44e-07	8.48e-06	UP	NA	NA	NA	NA	NA	NA	NA	NA	NA	NA	NA
	TRINITY_DN54513_c1_g1	8.81314	1.71e-08	4.11e-07	UP	TRINITY_DN54513_c1_g1	TraesCS7B01G411600.1	781	952	957	3.66e-71	TraesCS7B01G411600	chr7B	680072705	680074648	BTB/POZ domain protein, putative (DUF177)
	TRINITY_DN39725_c0_g2	8.81077	3.76e-09	9.94e-08	UP	NA	NA	NA	NA	NA	NA	NA	NA	NA	NA	NA
	TRINITY_DN81789_c0_g1	8.81002	1.05e-08	2.6e-07	UP	TRINITY_DN81789_c0_g1	TraesCS6D01G399500.1	1559	1855	2730	4.01e-117	TraesCS6D01G399500	chr6D	469962934	469969487	NBS-LRR-like resistance protein
	TRINITY_DN8513_c1_g1	8.80947	4.68e-08	1.06e-06	UP	TRINITY_DN8513_c1_g1	TraesCS7A01G454600.1	431	196	966	4.27e-113	TraesCS7A01G454600	chr7A	649421394	649422598	Early nodulin-like protein
	TRINITY_DN65252_c0_g1	8.80675	4.58e-08	1.04e-06	UP	TRINITY_DN65252_c0_g1	TraesCS3A01G529700.1	1	993	1755	0	TraesCS3A01G529700	chr3A	743101648	743104400	Ankyrin repeat-containing protein
	TRINITY_DN74793_c0_g5	8.80335	4.85e-09	1.26e-07	UP	NA	NA	NA	NA	NA	NA	NA	NA	NA	NA	NA
	TRINITY_DN65326_c0_g1	8.80244	8.77e-08	1.88e-06	UP	NA	NA	NA	NA	NA	NA	NA	NA	NA	NA	NA
	TRINITY_DN71329_c0_g2	8.80094	1.82e-08	4.36e-07	UP	NA	NA	NA	NA	NA	NA	NA	NA	NA	NA	NA
	TRINITY_DN87229_c2_g1	8.80041	3.54e-09	9.38e-08	UP	TRINITY_DN87229_c2_g1	TraesCS2B01G001900.1	1395	1519	1524	2.19e-46	TraesCS2B01G001900	chr2B	1314903	1317986	Cytochrome P450
	TRINITY_DN17896_c0_g2	8.79916	7.11e-09	1.81e-07	UP	NA	NA	NA	NA	NA	NA	NA	NA	NA	NA	NA
	TRINITY_DN1289_c0_g2	8.79833	3.76e-09	9.93e-08	UP	NA	NA	NA	NA	NA	NA	NA	NA	NA	NA	NA
	TRINITY_DN10141_c1_g1	8.79746	4.54e-09	1.18e-07	UP	NA	NA	NA	NA	NA	NA	NA	NA	NA	NA	NA
	TRINITY_DN59425_c0_g2	8.79746	4.54e-09	1.18e-07	UP	TRINITY_DN59425_c0_g2	TraesCS7B01G029700.1	6380	6547	7098	7.63e-72	TraesCS7B01G029700	chr7B	28309509	28318872	Pre-mRNA-processing-splicing factor 8
	TRINITY_DN30610_c0_g1	8.79705	8.89e-09	2.23e-07	UP	NA	NA	NA	NA	NA	NA	NA	NA	NA	NA	NA
	TRINITY_DN80118_c0_g2	8.79612	5.04e-08	1.13e-06	UP	TRINITY_DN80118_c0_g2	TraesCS4A01G331200.1	399	773	1068	2.23e-165	TraesCS4A01G331200	chr4A	615941151	615942218	Dolichyl-diphosphooligosaccharide--protein glycosyltransferase subunit DAD1
	TRINITY_DN75223_c0_g3	8.79589	2.38e-07	4.78e-06	UP	TRINITY_DN75223_c0_g3	TraesCS6B01G293900.1	301	363	1305	3.34e-22	TraesCS6B01G293900	chr6B	528085568	528091762	Survival motor neuron
	TRINITY_DN47076_c0_g1	8.79575	2.78e-07	5.52e-06	UP	NA	NA	NA	NA	NA	NA	NA	NA	NA	NA	NA
	TRINITY_DN32053_c0_g1	8.79335	6.77e-08	1.48e-06	UP	NA	NA	NA	NA	NA	NA	NA	NA	NA	NA	NA
	TRINITY_DN43408_c0_g1	8.79335	6.77e-08	1.48e-06	UP	TRINITY_DN43408_c0_g1	TraesCS6B01G435000.1	37	305	582	1.64e-120	TraesCS6B01G435000	chr6B	703288941	703290748	DNL-type zinc finger protein
	TRINITY_DN21711_c0_g1	8.79206	5.7e-09	1.46e-07	UP	TRINITY_DN21711_c0_g1	TraesCSU01G194700.1	597	842	894	3.21e-127	TraesCSU01G194700	chrUn	291936775	291937668	Disease resistance protein (NBS-LRR class) family
	TRINITY_DN23476_c0_g2	8.79137	1.59e-07	3.28e-06	UP	NA	NA	NA	NA	NA	NA	NA	NA	NA	NA	NA
	TRINITY_DN142794_c0_g1	8.79119	4.33e-09	1.13e-07	UP	NA	NA	NA	NA	NA	NA	NA	NA	NA	NA	NA
	TRINITY_DN43834_c2_g1	8.79067	2.06e-08	4.9e-07	UP	TRINITY_DN43834_c2_g1	TraesCS2A01G360000.1	414	353	480	1.83e-16	TraesCS2A01G360000	chr2A	603855754	603856938	Cysteine-rich receptor-like protein kinase 41
	TRINITY_DN13829_c1_g3	8.78898	1.3e-07	2.72e-06	UP	NA	NA	NA	NA	NA	NA	NA	NA	NA	NA	NA
	TRINITY_DN41311_c1_g1	8.7889	6.45e-07	1.19e-05	UP	NA	NA	NA	NA	NA	NA	NA	NA	NA	NA	NA
	TRINITY_DN60657_c0_g1	8.78752	2.02e-08	4.81e-07	UP	NA	NA	NA	NA	NA	NA	NA	NA	NA	NA	NA
	TRINITY_DN166547_c0_g1	8.78669	4.87e-07	9.23e-06	UP	NA	NA	NA	NA	NA	NA	NA	NA	NA	NA	NA
	TRINITY_DN21617_c0_g2	8.78572	1.01e-08	2.51e-07	UP	NA	NA	NA	NA	NA	NA	NA	NA	NA	NA	NA
	TRINITY_DN42066_c0_g1	8.7849	4.97e-09	1.29e-07	UP	TRINITY_DN42066_c0_g1	TraesCS5A01G023700.1	1214	1605	1605	0	TraesCS5A01G023700	chr5A	18812811	18817203	Glycosyltransferase
	TRINITY_DN25147_c0_g1	8.78192	5.62e-09	1.44e-07	UP	NA	NA	NA	NA	NA	NA	NA	NA	NA	NA	NA
	TRINITY_DN62121_c0_g4	8.78014	5.13e-07	9.67e-06	UP	TRINITY_DN62121_c0_g4	TraesCSU01G102000.1	2454	2806	2877	4.83e-133	TraesCSU01G102000	chrUn	89851170	89854465	NBS-LRR disease resistance protein
	TRINITY_DN55088_c0_g1	8.77981	5.49e-09	1.41e-07	UP	TRINITY_DN55088_c0_g1	TraesCS6B01G430000.1	380	440	2358	8.63e-23	TraesCS6B01G430000	chr6B	697752894	697760241	Protein kinase family protein
	TRINITY_DN47511_c0_g1	8.7783	3.52e-08	8.12e-07	UP	TRINITY_DN47511_c0_g1	TraesCS2B01G047100.2	721	936	936	5.49e-110	TraesCS2B01G047100	chr2B	23549342	23550688	Nicotianamine synthase
	TRINITY_DN68201_c0_g1	8.77791	7.15e-07	1.31e-05	UP	NA	NA	NA	NA	NA	NA	NA	NA	NA	NA	NA
	TRINITY_DN3743_c0_g2	8.7777	5.51e-09	1.42e-07	UP	TRINITY_DN3743_c0_g2	TraesCS7A01G317900.1	270	59	795	1.01e-106	TraesCS7A01G317900	chr7A	458710847	458712063	Beta-carotene isomerase D27, chloroplastic
	TRINITY_DN56650_c0_g1	8.77534	6.75e-07	1.25e-05	UP	TRINITY_DN56650_c0_g1	TraesCSU01G112000.1	3544	3949	4254	0	TraesCSU01G112000	chrUn	96152486	96160202	NBS-LRR-like resistance protein
	TRINITY_DN94702_c0_g1	8.76905	6.26e-08	1.38e-06	UP	TRINITY_DN94702_c0_g1	TraesCS4A01G441400.1	338	395	753	8.77e-23	TraesCS4A01G441400	chr4A	709894624	709896089	RING/U-box superfamily protein
	TRINITY_DN38394_c0_g2	8.76686	4.9e-08	1.11e-06	UP	TRINITY_DN38394_c0_g2	TraesCS5B01G293000.1	351	581	585	6.91e-79	TraesCS5B01G293000	chr5B	478329117	478329701	Aspartate aminotransferase
	TRINITY_DN95853_c0_g1	8.76686	4.9e-08	1.11e-06	UP	TRINITY_DN95853_c0_g1	TraesCS6D01G399500.1	1620	1976	2730	1.13e-93	TraesCS6D01G399500	chr6D	469962934	469969487	NBS-LRR-like resistance protein
	TRINITY_DN65226_c0_g2	8.76565	3.31e-08	7.66e-07	UP	TRINITY_DN65226_c0_g2	TraesCS6A01G247500.1	270	146	381	1.25e-24	TraesCS6A01G247500	chr6A	459672545	459675026	SBP (S-ribonuclease binding protein) family protein
	TRINITY_DN103122_c0_g2	8.76467	3.88e-08	8.88e-07	UP	NA	NA	NA	NA	NA	NA	NA	NA	NA	NA	NA
	TRINITY_DN74383_c0_g1	8.76248	3.11e-08	7.22e-07	UP	NA	NA	NA	NA	NA	NA	NA	NA	NA	NA	NA
	TRINITY_DN26505_c1_g3	8.76197	1.38e-07	2.88e-06	UP	TRINITY_DN26505_c1_g3	TraesCS3D01G013900.1	1183	1445	2046	2.79e-103	TraesCS3D01G013900	chr3D	4966269	4969326	Receptor-like kinase
	TRINITY_DN65955_c0_g2	8.76193	1.44e-06	2.49e-05	UP	TRINITY_DN65955_c0_g2	TraesCS7A01G264700.1	224	308	510	6.85e-27	TraesCS7A01G264700	chr7A	264172286	264174097	Spc97 / Spc98 family of spindle pole body (SBP) component
	TRINITY_DN86952_c0_g1	8.75753	8.23e-08	1.78e-06	UP	TRINITY_DN86952_c0_g1	TraesCS7A01G082000.1	3	138	429	1.83e-54	TraesCS7A01G082000	chr7A	47292593	47307403	60S ribosomal protein L5
	TRINITY_DN52361_c0_g4	8.75678	8.35e-09	2.1e-07	UP	NA	NA	NA	NA	NA	NA	NA	NA	NA	NA	NA
	TRINITY_DN52410_c0_g2	8.75596	1.74e-08	4.19e-07	UP	NA	NA	NA	NA	NA	NA	NA	NA	NA	NA	NA
	TRINITY_DN16104_c0_g3	8.75463	8.77e-09	2.2e-07	UP	TRINITY_DN16104_c0_g3	TraesCS7A01G464600.1	1948	2157	3228	3.03e-47	TraesCS7A01G464600	chr7A	661164633	661169090	Disease resistance protein (NBS-LRR class) family
	TRINITY_DN224971_c0_g1	8.75463	8.77e-09	2.2e-07	UP	TRINITY_DN224971_c0_g1	TraesCS3A01G017800.1	1146	1211	1224	4.01e-25	TraesCS3A01G017800	chr3A	11349647	11351979	F-box family protein
	TRINITY_DN65550_c0_g1	8.75463	8.77e-09	2.2e-07	UP	NA	NA	NA	NA	NA	NA	NA	NA	NA	NA	NA
	TRINITY_DN61745_c0_g1	8.7546	1.57e-07	3.25e-06	UP	NA	NA	NA	NA	NA	NA	NA	NA	NA	NA	NA
	TRINITY_DN141810_c0_g3	8.75408	3.65e-08	8.4e-07	UP	TRINITY_DN141810_c0_g3	TraesCS7D01G545800.1	2625	2929	3954	6.48e-160	TraesCS7D01G545800	chr7D	632801275	632820118	receptor kinase 1
	TRINITY_DN22947_c0_g1	8.75162	1.39e-08	3.39e-07	UP	TRINITY_DN22947_c0_g1	TraesCS7D01G409300.1	229	393	483	1.58e-81	TraesCS7D01G409300	chr7D	528058592	528061010	Bifunctional protein HldE
	TRINITY_DN16698_c1_g3	8.75033	9.15e-09	2.29e-07	UP	NA	NA	NA	NA	NA	NA	NA	NA	NA	NA	NA
	TRINITY_DN37745_c0_g1	8.75011	2.98e-07	5.88e-06	UP	TRINITY_DN37745_c0_g1	TraesCS4B01G389700.1	2086	2338	2796	1.98e-129	TraesCS4B01G389700	chr4B	666048490	666057862	Protein kinase, putative
	TRINITY_DN133345_c0_g1	8.74512	1.08e-08	2.66e-07	UP	NA	NA	NA	NA	NA	NA	NA	NA	NA	NA	NA
	TRINITY_DN77079_c0_g1	8.74462	2.95e-08	6.87e-07	UP	NA	NA	NA	NA	NA	NA	NA	NA	NA	NA	NA
	TRINITY_DN50195_c0_g1	8.74385	1.2e-08	2.95e-07	UP	TRINITY_DN50195_c0_g1	TraesCS6B01G055800.1	912	1088	1302	5.77e-30	TraesCS6B01G055800	chr6B	36039051	36041644	F-box family protein
	TRINITY_DN95266_c0_g1	8.74296	1.6e-07	3.29e-06	UP	TRINITY_DN95266_c0_g1	TraesCS3A01G288800.1	1763	1826	1938	7e-24	TraesCS3A01G288800	chr3A	516802231	516806220	Sulfate transporter, putative
	TRINITY_DN17121_c1_g1	8.74212	2.14e-08	5.08e-07	UP	TRINITY_DN17121_c1_g1	TraesCS6A01G319400.1	937	1043	1413	1.06e-47	TraesCS6A01G319400	chr6A	554832779	554836056	F-box family protein
	TRINITY_DN52429_c0_g1	8.74167	1.49e-08	3.6e-07	UP	TRINITY_DN52429_c0_g1	TraesCS1B01G327300.1	956	1046	1497	4.75e-37	TraesCS1B01G327300	chr1B	553553908	553558333	E3 ubiquitin-protein ligase
	TRINITY_DN68583_c0_g1	8.74146	7.45e-08	1.62e-06	UP	TRINITY_DN68583_c0_g1	TraesCS2B01G037900.1	1	84	2862	3.53e-22	TraesCS2B01G037900	chr2B	17564300	17571243	Disease resistance protein (NBS-LRR class) family
	TRINITY_DN225462_c0_g1	8.7402	5.29e-08	1.18e-06	UP	NA	NA	NA	NA	NA	NA	NA	NA	NA	NA	NA
	TRINITY_DN28938_c1_g1	8.73993	1.86e-08	4.45e-07	UP	NA	NA	NA	NA	NA	NA	NA	NA	NA	NA	NA
	TRINITY_DN71889_c1_g1	8.73949	1.76e-08	4.23e-07	UP	NA	NA	NA	NA	NA	NA	NA	NA	NA	NA	NA
	TRINITY_DN74683_c1_g1	8.73862	1.13e-08	2.79e-07	UP	NA	NA	NA	NA	NA	NA	NA	NA	NA	NA	NA
	TRINITY_DN74455_c1_g1	8.73649	2.06e-07	4.17e-06	UP	NA	NA	NA	NA	NA	NA	NA	NA	NA	NA	NA
	TRINITY_DN69366_c0_g2	8.73479	3.88e-08	8.89e-07	UP	TRINITY_DN69366_c0_g2	TraesCS6B01G070500.1	3155	3552	4257	0	TraesCS6B01G070500	chr6B	47136876	47143974	NBS-LRR-like resistance protein
	TRINITY_DN32536_c2_g1	8.73337	1.39e-08	3.38e-07	UP	NA	NA	NA	NA	NA	NA	NA	NA	NA	NA	NA
	TRINITY_DN48242_c0_g2	8.73158	5.99e-07	1.11e-05	UP	TRINITY_DN48242_c0_g2	TraesCS4A01G486400.1	957	999	2223	1.02e-10	TraesCS4A01G486400	chr4A	739595717	739600170	3-methyl-2-oxobutanoate hydroxymethyltransferase
	TRINITY_DN122572_c3_g1	8.73137	3.01e-06	4.82e-05	UP	TRINITY_DN122572_c3_g1	TraesCS1B01G007400.2	1725	1971	3396	2.06e-84	TraesCS1B01G007400	chr1B	4150758	4154324	Receptor protein kinase, putative
	TRINITY_DN64486_c0_g1	8.73119	1.33e-08	3.24e-07	UP	TRINITY_DN64486_c0_g1	TraesCS1A01G062800.1	1	60	396	8.22e-15	TraesCS1A01G062800	chr1A	42715494	42716695	4'-phosphopantetheinyl transferase
	TRINITY_DN50644_c0_g1	8.72926	1.14e-06	2.02e-05	UP	NA	NA	NA	NA	NA	NA	NA	NA	NA	NA	NA
	TRINITY_DN98276_c0_g1	8.72747	8.18e-08	1.76e-06	UP	TRINITY_DN98276_c0_g1	TraesCS5B01G124100.1	28	201	1134	1.64e-25	TraesCS5B01G124100	chr5B	223983433	223985799	Actin
	TRINITY_DN31890_c1_g1	8.72618	7.67e-08	1.66e-06	UP	NA	NA	NA	NA	NA	NA	NA	NA	NA	NA	NA
	TRINITY_DN31811_c0_g2	8.72374	1.96e-08	4.68e-07	UP	TRINITY_DN31811_c0_g2	TraesCS3A01G505600.1	1552	1815	2379	7.58e-124	TraesCS3A01G505600	chr3A	727397644	727400541	Disease resistance protein RPM1
	TRINITY_DN36536_c0_g2	8.72374	1.96e-08	4.68e-07	UP	NA	NA	NA	NA	NA	NA	NA	NA	NA	NA	NA
	TRINITY_DN41856_c0_g1	8.72298	5.32e-08	1.19e-06	UP	NA	NA	NA	NA	NA	NA	NA	NA	NA	NA	NA
	TRINITY_DN160807_c0_g1	8.72243	1.56e-08	3.78e-07	UP	NA	NA	NA	NA	NA	NA	NA	NA	NA	NA	NA
	TRINITY_DN65367_c2_g1	8.72074	4.38e-08	9.95e-07	UP	NA	NA	NA	NA	NA	NA	NA	NA	NA	NA	NA
	TRINITY_DN101625_c0_g2	8.72022	1.72e-08	4.13e-07	UP	TRINITY_DN101625_c0_g2	TraesCS7B01G175100.1	120	181	315	1.31e-19	TraesCS7B01G175100	chr7B	246029760	246031075	ATP synthase subunit beta
	TRINITY_DN80180_c0_g1	8.71655	6.08e-08	1.34e-06	UP	NA	NA	NA	NA	NA	NA	NA	NA	NA	NA	NA
	TRINITY_DN114316_c0_g1	8.71405	2.9e-08	6.77e-07	UP	NA	NA	NA	NA	NA	NA	NA	NA	NA	NA	NA
	TRINITY_DN40525_c0_g1	8.71134	3.41e-08	7.89e-07	UP	NA	NA	NA	NA	NA	NA	NA	NA	NA	NA	NA
	TRINITY_DN63045_c0_g1	8.71134	3.41e-08	7.89e-07	UP	TRINITY_DN63045_c0_g1	TraesCSU01G156100.1	1723	2043	2043	6.75e-81	TraesCSU01G156100	chrUn	214328059	214330707	Receptor-like protein kinase
	TRINITY_DN39323_c0_g1	8.71049	1.91e-08	4.55e-07	UP	TRINITY_DN39323_c0_g1	TraesCS2A01G030000.1	1752	2074	3285	7.22e-125	TraesCS2A01G030000	chr2A	13811892	13815254	NBS-LRR-like resistance protein
	TRINITY_DN23527_c0_g2	8.70973	1.48e-07	3.07e-06	UP	TRINITY_DN23527_c0_g2	TraesCS7A01G004100.1	3972	3551	4539	0	TraesCS7A01G004100	chr7A	1993201	2002627	disease resistance protein (TIR-NBS-LRR class)
	TRINITY_DN197122_c0_g1	8.70881	5.97e-08	1.32e-06	UP	NA	NA	NA	NA	NA	NA	NA	NA	NA	NA	NA
	TRINITY_DN57168_c0_g1	8.70789	1.14e-06	2e-05	UP	TRINITY_DN57168_c0_g1	TraesCS4B01G367300.1	1826	1929	1929	2.29e-48	TraesCS4B01G367300	chr4B	654273788	654275716	Scarecrow transcription factor family protein
	TRINITY_DN85400_c0_g1	8.70789	1.14e-06	2e-05	UP	TRINITY_DN85400_c0_g1	TraesCS4D01G282200.1	442	648	1254	1.27e-105	TraesCS4D01G282200	chr4D	453307201	453321181	Kelch repeat-containing F-box family protein
	TRINITY_DN110006_c0_g1	8.70782	9.22e-07	1.66e-05	UP	NA	NA	NA	NA	NA	NA	NA	NA	NA	NA	NA
	TRINITY_DN19403_c0_g3	8.70743	1.98e-07	4.03e-06	UP	TRINITY_DN19403_c0_g3	TraesCS7D01G538400.1	330	388	408	1.82e-21	TraesCS7D01G538400	chr7D	629380667	629382044	High mobility group protein
	TRINITY_DN100833_c0_g1	8.70684	5.29e-08	1.18e-06	UP	TRINITY_DN100833_c0_g1	TraesCS5D01G419800.1	68	409	1254	2.15e-97	TraesCS5D01G419800	chr5D	480603590	480605077	NBS-LRR disease resistance protein-like protein
	TRINITY_DN50281_c0_g1	8.70534	4.26e-06	6.58e-05	UP	TRINITY_DN50281_c0_g1	TraesCS7B01G349500.1	29	222	432	1.65e-76	TraesCS7B01G349500	chr7B	606353537	606356469	Transcription initiation factor IIA subunit 2
	TRINITY_DN62733_c1_g2	8.70381	2.62e-08	6.15e-07	UP	NA	NA	NA	NA	NA	NA	NA	NA	NA	NA	NA
	TRINITY_DN58595_c1_g1	8.70089	5.45e-07	1.02e-05	UP	NA	NA	NA	NA	NA	NA	NA	NA	NA	NA	NA
	TRINITY_DN41478_c0_g1	8.69931	3.92e-08	8.96e-07	UP	NA	NA	NA	NA	NA	NA	NA	NA	NA	NA	NA
	TRINITY_DN48628_c0_g1	8.69931	3.92e-08	8.96e-07	UP	NA	NA	NA	NA	NA	NA	NA	NA	NA	NA	NA
	TRINITY_DN42467_c0_g2	8.69856	4.22e-07	8.09e-06	UP	TRINITY_DN42467_c0_g2	TraesCS4A01G491400.1	1	394	1179	4.19e-148	TraesCS4A01G491400	chr4A	741045409	741046587	Leucine-rich repeat receptor-like protein kinase family protein, putative
	TRINITY_DN249650_c0_g1	8.69845	2.33e-08	5.51e-07	UP	NA	NA	NA	NA	NA	NA	NA	NA	NA	NA	NA
	TRINITY_DN70517_c0_g2	8.69845	2.33e-08	5.51e-07	UP	NA	NA	NA	NA	NA	NA	NA	NA	NA	NA	NA
	TRINITY_DN149169_c0_g1	8.69531	2.84e-08	6.63e-07	UP	NA	NA	NA	NA	NA	NA	NA	NA	NA	NA	NA
	TRINITY_DN100550_c0_g2	8.69306	2.69e-08	6.3e-07	UP	NA	NA	NA	NA	NA	NA	NA	NA	NA	NA	NA
	TRINITY_DN14452_c0_g4	8.68996	4.84e-08	1.09e-06	UP	NA	NA	NA	NA	NA	NA	NA	NA	NA	NA	NA
	TRINITY_DN24636_c2_g1	8.68856	2.61e-08	6.14e-07	UP	TRINITY_DN24636_c2_g1	TraesCS6B01G030900.1	442	2459	2499	0	TraesCS6B01G030900	chr6B	18381096	18383699	NBS-LRR disease resistance protein, putative, expressed
	TRINITY_DN28263_c2_g2	8.68697	1.37e-07	2.86e-06	UP	NA	NA	NA	NA	NA	NA	NA	NA	NA	NA	NA
	TRINITY_DN210949_c0_g1	8.68467	1.11e-07	2.35e-06	UP	NA	NA	NA	NA	NA	NA	NA	NA	NA	NA	NA
	TRINITY_DN108096_c0_g1	8.68405	3.04e-08	7.06e-07	UP	NA	NA	NA	NA	NA	NA	NA	NA	NA	NA	NA
	TRINITY_DN80458_c0_g5	8.68367	1.03e-06	1.83e-05	UP	TRINITY_DN80458_c0_g5	TraesCS7B01G427800.1	3355	3646	4485	5.19e-106	TraesCS7B01G427800	chr7B	697073102	697081669	Receptor-like protein kinase
	TRINITY_DN22333_c2_g1	8.67952	3.67e-08	8.42e-07	UP	TRINITY_DN22333_c2_g1	TraesCS2D01G068300.1	1283	1	3258	0	TraesCS2D01G068300	chr2D	28729893	28733150	FACT complex subunit SPT16
	TRINITY_DN43668_c0_g1	8.67891	1.92e-06	3.22e-05	UP	TRINITY_DN43668_c0_g1	TraesCS4A01G317800.1	1833	1992	3210	9.8e-43	TraesCS4A01G317800	chr4A	607045527	607055050	Exportin-1
	TRINITY_DN61623_c2_g1	8.67891	1.92e-06	3.22e-05	UP	TRINITY_DN61623_c2_g1	TraesCS2B01G037300.1	622	855	906	3.48e-52	TraesCS2B01G037300	chr2B	17465376	17466281	Receptor kinase-like protein
	TRINITY_DN71072_c0_g1	8.67891	1.92e-06	3.22e-05	UP	NA	NA	NA	NA	NA	NA	NA	NA	NA	NA	NA
	TRINITY_DN54833_c0_g1	8.67861	3.32e-08	7.68e-07	UP	TRINITY_DN54833_c0_g1	TraesCS7B01G430300.1	401	806	2154	0	TraesCS7B01G430300	chr7B	698933998	698938070	Receptor-like protein kinase
	TRINITY_DN25401_c2_g1	8.67777	6.49e-08	1.43e-06	UP	NA	NA	NA	NA	NA	NA	NA	NA	NA	NA	NA
	TRINITY_DN67543_c0_g1	8.67643	4.65e-06	7.09e-05	UP	TRINITY_DN67543_c0_g1	TraesCS7D01G506500.1	1	102	120	1.71e-45	TraesCS7D01G506500	chr7D	611294578	611294697	Rotundifolia-like protein
	TRINITY_DN87012_c2_g1	8.67477	1.76e-07	3.62e-06	UP	NA	NA	NA	NA	NA	NA	NA	NA	NA	NA	NA
	TRINITY_DN42791_c0_g1	8.67402	3.75e-06	5.86e-05	UP	TRINITY_DN42791_c0_g1	TraesCS6A01G000200.1	1311	1543	2748	5.1e-120	TraesCS6A01G000200	chr6A	103455	110107	Receptor-like protein kinase
	TRINITY_DN34536_c0_g1	8.67318	4.97e-08	1.12e-06	UP	NA	NA	NA	NA	NA	NA	NA	NA	NA	NA	NA
	TRINITY_DN178695_c0_g1	8.67244	1.51e-07	3.13e-06	UP	NA	NA	NA	NA	NA	NA	NA	NA	NA	NA	NA
	TRINITY_DN37861_c0_g1	8.67179	3.71e-08	8.51e-07	UP	NA	NA	NA	NA	NA	NA	NA	NA	NA	NA	NA
	TRINITY_DN51715_c1_g2	8.67179	3.71e-08	8.51e-07	UP	NA	NA	NA	NA	NA	NA	NA	NA	NA	NA	NA
	TRINITY_DN44606_c0_g2	8.67035	7.61e-08	1.65e-06	UP	NA	NA	NA	NA	NA	NA	NA	NA	NA	NA	NA
	TRINITY_DN73277_c0_g1	8.67012	1.24e-07	2.61e-06	UP	NA	NA	NA	NA	NA	NA	NA	NA	NA	NA	NA
	TRINITY_DN132034_c0_g1	8.6686	4.45e-08	1.01e-06	UP	NA	NA	NA	NA	NA	NA	NA	NA	NA	NA	NA
	TRINITY_DN32335_c0_g3	8.6686	4.45e-08	1.01e-06	UP	TRINITY_DN32335_c0_g3	TraesCS1B01G000300.1	634	829	852	1.28e-97	TraesCS1B01G000300	chr1B	711793	713476	Disease resistance protein (NBS-LRR class) family
	TRINITY_DN48799_c0_g1	8.6686	4.45e-08	1.01e-06	UP	NA	NA	NA	NA	NA	NA	NA	NA	NA	NA	NA
	TRINITY_DN60071_c0_g1	8.66631	4.23e-08	9.62e-07	UP	TRINITY_DN60071_c0_g1	TraesCS7A01G405100.1	5	242	453	7.26e-64	TraesCS7A01G405100	chr7A	588741125	588752266	TSL-kinase interacting-like protein
	TRINITY_DN27564_c1_g2	8.66402	4.13e-08	9.4e-07	UP	TRINITY_DN27564_c1_g2	TraesCS3A01G079200.1	1	29	1692	7.36e-06	TraesCS3A01G079200	chr3A	51280614	51291420	Ubiquitin family protein
	TRINITY_DN64615_c0_g1	8.66402	4.13e-08	9.4e-07	UP	TRINITY_DN64615_c0_g1	TraesCS7B01G029700.1	5043	5281	7098	5.13e-55	TraesCS7B01G029700	chr7B	28309509	28318872	Pre-mRNA-processing-splicing factor 8
	TRINITY_DN83444_c0_g1	8.66402	4.13e-08	9.4e-07	UP	TRINITY_DN83444_c0_g1	TraesCS7B01G202900.1	885	926	1878	7.02e-14	TraesCS7B01G202900	chr7B	372046339	372048845	XH/XS domain protein
	TRINITY_DN55985_c0_g1	8.66337	1.53e-07	3.16e-06	UP	TRINITY_DN55985_c0_g1	TraesCS6D01G399500.1	2526	2703	2730	3.85e-74	TraesCS6D01G399500	chr6D	469962934	469969487	NBS-LRR-like resistance protein
	TRINITY_DN23877_c0_g2	8.66315	7.48e-08	1.63e-06	UP	NA	NA	NA	NA	NA	NA	NA	NA	NA	NA	NA
	TRINITY_DN42055_c0_g3	8.66175	4.86e-06	7.38e-05	UP	NA	NA	NA	NA	NA	NA	NA	NA	NA	NA	NA
	TRINITY_DN41024_c0_g1	8.65565	1.07e-07	2.26e-06	UP	NA	NA	NA	NA	NA	NA	NA	NA	NA	NA	NA
	TRINITY_DN252745_c0_g1	8.6539	5.41e-08	1.21e-06	UP	NA	NA	NA	NA	NA	NA	NA	NA	NA	NA	NA
	TRINITY_DN14781_c3_g1	8.65073	9.98e-08	2.13e-06	UP	NA	NA	NA	NA	NA	NA	NA	NA	NA	NA	NA
	TRINITY_DN43380_c0_g2	8.65007	3.3e-07	6.46e-06	UP	TRINITY_DN43380_c0_g2	TraesCS5D01G225800.1	10	299	951	2.9e-148	TraesCS5D01G225800	chr5D	334255216	334256281	Myb transcription factor
	TRINITY_DN121003_c0_g1	8.64927	5.16e-08	1.16e-06	UP	NA	NA	NA	NA	NA	NA	NA	NA	NA	NA	NA
	TRINITY_DN37908_c0_g1	8.64927	5.16e-08	1.16e-06	UP	NA	NA	NA	NA	NA	NA	NA	NA	NA	NA	NA
	TRINITY_DN51671_c0_g1	8.64927	5.16e-08	1.16e-06	UP	TRINITY_DN51671_c0_g1	TraesCS6B01G004000.1	1897	2113	2727	1.72e-109	TraesCS6B01G004000	chr6B	3122693	3127984	Receptor-like protein kinase
	TRINITY_DN51598_c0_g1	8.64858	2.18e-07	4.39e-06	UP	TRINITY_DN51598_c0_g1	TraesCSU01G129900.1	552	453	552	2.15e-44	TraesCSU01G129900	chrUn	110521993	110522874	Phosphatidylinositol N-acetylglucosaminyltransferase subunit P
	TRINITY_DN94618_c0_g1	8.64785	7.78e-08	1.68e-06	UP	NA	NA	NA	NA	NA	NA	NA	NA	NA	NA	NA
	TRINITY_DN148518_c0_g1	8.64695	5.25e-08	1.17e-06	UP	NA	NA	NA	NA	NA	NA	NA	NA	NA	NA	NA
	TRINITY_DN29389_c0_g2	8.64695	5.25e-08	1.17e-06	UP	TRINITY_DN29389_c0_g2	TraesCS7D01G010700.1	1104	2506	4344	0	TraesCS7D01G010700	chr7D	5007782	5013836	NBS-LRR disease resistance protein-like protein
	TRINITY_DN13182_c0_g1	8.64606	7.71e-08	1.67e-06	UP	NA	NA	NA	NA	NA	NA	NA	NA	NA	NA	NA
	TRINITY_DN110549_c3_g1	8.64463	5.49e-08	1.22e-06	UP	TRINITY_DN110549_c3_g1	TraesCS5D01G012900.1	1116	957	1473	8.55e-78	TraesCS5D01G012900	chr5D	7004915	7008523	Oxidoreductase, putative
	TRINITY_DN52168_c0_g1	8.64203	3.19e-06	5.08e-05	UP	TRINITY_DN52168_c0_g1	TraesCS5A01G204300.1	1	134	1587	1.14e-61	TraesCS5A01G204300	chr5A	413427997	413430358	Cytochrome P450, putative
	TRINITY_DN45013_c0_g5	8.63934	3.05e-06	4.87e-05	UP	NA	NA	NA	NA	NA	NA	NA	NA	NA	NA	NA
	TRINITY_DN35572_c0_g1	8.63905	6.6e-08	1.45e-06	UP	TRINITY_DN35572_c0_g1	TraesCS4A01G454400.1	1697	3072	3072	0	TraesCS4A01G454400	chr4A	718470942	718474357	NBS-LRR disease resistance protein
	TRINITY_DN54410_c0_g1	8.63841	1.88e-07	3.84e-06	UP	NA	NA	NA	NA	NA	NA	NA	NA	NA	NA	NA
	TRINITY_DN76648_c0_g1	8.63528	8.89e-08	1.91e-06	UP	TRINITY_DN76648_c0_g1	TraesCS3D01G009200.1	577	660	660	8.01e-24	TraesCS3D01G009200	chr3D	3088068	3089389	basic helix-loop-helix (bHLH) DNA-binding superfamily protein
	TRINITY_DN10537_c0_g2	8.63468	1.47e-06	2.53e-05	UP	TRINITY_DN10537_c0_g2	TraesCS2B01G604600.1	363	124	393	6.91e-109	TraesCS2B01G604600	chr2B	786105639	786106031	Protein kinase family protein
	TRINITY_DN142604_c0_g1	8.63292	1.04e-07	2.21e-06	UP	NA	NA	NA	NA	NA	NA	NA	NA	NA	NA	NA
	TRINITY_DN11549_c2_g4	8.63274	2.82e-07	5.59e-06	UP	NA	NA	NA	NA	NA	NA	NA	NA	NA	NA	NA
	TRINITY_DN56857_c0_g1	8.63055	1.24e-07	2.61e-06	UP	TRINITY_DN56857_c0_g1	TraesCS1B01G001800.1	836	1120	3690	3.67e-147	TraesCS1B01G001800	chr1B	1430395	1435818	Phospholipid-transporting ATPase
	TRINITY_DN165208_c0_g1	8.6288	5.47e-07	1.03e-05	UP	NA	NA	NA	NA	NA	NA	NA	NA	NA	NA	NA
	TRINITY_DN31436_c1_g1	8.6288	5.47e-07	1.03e-05	UP	NA	NA	NA	NA	NA	NA	NA	NA	NA	NA	NA
	TRINITY_DN66420_c1_g1	8.62795	1.99e-07	4.04e-06	UP	TRINITY_DN66420_c1_g1	TraesCSU01G211600.1	2	597	804	0	TraesCSU01G211600	chrUn	314008294	314010095	receptor kinase 1
	TRINITY_DN45251_c0_g1	8.62736	7.29e-07	1.33e-05	UP	TRINITY_DN45251_c0_g1	TraesCS1A01G006500.1	1549	1897	3195	1.28e-142	TraesCS1A01G006500	chr1A	3579010	3582502	Receptor protein kinase, putative
	TRINITY_DN68383_c0_g1	8.6264	7.86e-08	1.7e-06	UP	NA	NA	NA	NA	NA	NA	NA	NA	NA	NA	NA
	TRINITY_DN32145_c0_g1	8.62497	8.59e-08	1.85e-06	UP	NA	NA	NA	NA	NA	NA	NA	NA	NA	NA	NA
	TRINITY_DN45631_c1_g2	8.62338	2.5e-07	4.99e-06	UP	TRINITY_DN45631_c1_g2	TraesCS3A01G006400.1	880	459	1215	0	TraesCS3A01G006400	chr3A	7278672	7280289	Cell division cycle protein 123 like
	TRINITY_DN47457_c1_g1	8.62317	1.4e-07	2.93e-06	UP	NA	NA	NA	NA	NA	NA	NA	NA	NA	NA	NA
	TRINITY_DN57323_c1_g1	8.62249	4.54e-07	8.65e-06	UP	TRINITY_DN57323_c1_g1	TraesCS3D01G004200.1	880	1101	1251	6.42e-99	TraesCS3D01G004200	chr3D	1743863	1745113	Cell division cycle protein 123
	TRINITY_DN67261_c1_g2	8.62168	7.37e-08	1.61e-06	UP	TRINITY_DN67261_c1_g2	TraesCS5A01G358400.1	1	2586	2586	0	TraesCS5A01G358400	chr5A	560716670	560722035	Embryogenesis transmembrane protein-like
	TRINITY_DN49130_c0_g1	8.62096	3.18e-07	6.24e-06	UP	TRINITY_DN49130_c0_g1	TraesCS4B01G213200.1	1888	2546	3486	0	TraesCS4B01G213200	chr4B	451491916	451504394	SH3 domain containing protein, expressed
	TRINITY_DN152529_c0_g3	8.62079	1.21e-07	2.55e-06	UP	TRINITY_DN152529_c0_g3	TraesCS2D01G041000.2	203	470	1167	7.91e-109	TraesCS2D01G041000	chr2D	14800871	14804426	Phosphoglycerate mutase-like protein
	TRINITY_DN8595_c5_g1	8.62079	1.21e-07	2.55e-06	UP	TRINITY_DN8595_c5_g1	TraesCS7A01G559700.1	486	756	960	4.86e-91	TraesCS7A01G559700	chr7A	731615071	731616030	F-box domain containing protein
	TRINITY_DN121174_c0_g1	8.61958	1.48e-06	2.56e-05	UP	TRINITY_DN121174_c0_g1	TraesCS3B01G030500.1	1834	1926	1926	3.02e-37	TraesCS3B01G030500	chr3B	13961475	13964705	Receptor-like kinase
	TRINITY_DN67988_c0_g1	8.619	1.69e-06	2.88e-05	UP	TRINITY_DN67988_c0_g1	TraesCS7A01G015200.1	1339	1632	2535	3.87e-95	TraesCS7A01G015200	chr7A	6651167	6658327	receptor kinase 1
	TRINITY_DN88388_c0_g1	8.61764	2.92e-07	5.77e-06	UP	TRINITY_DN88388_c0_g1	TraesCSU01G042900.1	580	1068	1980	2.95e-175	TraesCSU01G042900	chrUn	34655718	34658022	Receptor-like protein kinase
	TRINITY_DN10870_c0_g1	8.61711	4.19e-24	1.06e-21	UP	NA	NA	NA	NA	NA	NA	NA	NA	NA	NA	NA
	TRINITY_DN29430_c0_g1	8.6161	5.33e-07	1e-05	UP	NA	NA	NA	NA	NA	NA	NA	NA	NA	NA	NA
	TRINITY_DN32633_c0_g5	8.61544	1.61e-07	3.3e-06	UP	TRINITY_DN32633_c0_g5	TraesCS7D01G544000.1	1990	2301	2754	8.9e-139	TraesCS7D01G544000	chr7D	632020979	632024254	NBS-LRR-like resistance protein
	TRINITY_DN37248_c0_g2	8.61544	1.61e-07	3.3e-06	UP	TRINITY_DN37248_c0_g2	TraesCS3A01G262700.10	2350	2415	2682	4.02e-23	TraesCS3A01G262700	chr3A	485677416	485688116	Zinc finger protein-like
	TRINITY_DN47183_c0_g1	8.61458	8.73e-08	1.87e-06	UP	NA	NA	NA	NA	NA	NA	NA	NA	NA	NA	NA
	TRINITY_DN28037_c0_g4	8.61403	3.18e-06	5.07e-05	UP	TRINITY_DN28037_c0_g4	TraesCS6D01G333000.1	481	274	489	3.62e-91	TraesCS6D01G333000	chr6D	435711668	435712447	Dehydrin
	TRINITY_DN163866_c0_g1	8.61303	2.1e-07	4.24e-06	UP	NA	NA	NA	NA	NA	NA	NA	NA	NA	NA	NA
	TRINITY_DN33799_c0_g1	8.61126	8.9e-08	1.91e-06	UP	NA	NA	NA	NA	NA	NA	NA	NA	NA	NA	NA
	TRINITY_DN3400_c2_g1	8.60981	1.07e-07	2.26e-06	UP	NA	NA	NA	NA	NA	NA	NA	NA	NA	NA	NA
	TRINITY_DN95191_c0_g1	8.60973	5.87e-07	1.09e-05	UP	NA	NA	NA	NA	NA	NA	NA	NA	NA	NA	NA
	TRINITY_DN96503_c0_g1	8.6093	2.5e-06	4.09e-05	UP	NA	NA	NA	NA	NA	NA	NA	NA	NA	NA	NA
	TRINITY_DN32770_c2_g1	8.60888	8.62e-08	1.85e-06	UP	TRINITY_DN32770_c2_g1	TraesCS3A01G016800.1	857	1077	1398	4.87e-110	TraesCS3A01G016800	chr3A	10882209	10885595	Receptor-like protein kinase
	TRINITY_DN43615_c0_g2	8.60888	8.62e-08	1.85e-06	UP	TRINITY_DN43615_c0_g2	TraesCS6B01G003600.1	2083	2343	2343	1.63e-52	TraesCS6B01G003600	chr6B	2636558	2638900	transmembrane protein, putative (DUF594)
	TRINITY_DN54153_c0_g1	8.60818	3.31e-07	6.48e-06	UP	TRINITY_DN54153_c0_g1	TraesCS7B01G199600.1	21	236	864	2.88e-102	TraesCS7B01G199600	chr7B	360406111	360407359	RING domain ligase2 isoform 1
	TRINITY_DN104510_c0_g1	8.60573	4.24e-07	8.13e-06	UP	TRINITY_DN104510_c0_g1	TraesCS2D01G475800.1	427	961	1491	0	TraesCS2D01G475800	chr2D	578332873	578334363	Tyrosine decarboxylase
	TRINITY_DN52164_c1_g1	8.60558	1.31e-07	2.75e-06	UP	NA	NA	NA	NA	NA	NA	NA	NA	NA	NA	NA
	TRINITY_DN28367_c1_g3	8.60501	1.43e-07	2.98e-06	UP	NA	NA	NA	NA	NA	NA	NA	NA	NA	NA	NA
	TRINITY_DN54050_c0_g1	8.60501	1.43e-07	2.98e-06	UP	NA	NA	NA	NA	NA	NA	NA	NA	NA	NA	NA
	TRINITY_DN54128_c0_g1	8.60501	1.43e-07	2.98e-06	UP	TRINITY_DN54128_c0_g1	TraesCS7A01G315500.1	1	80	915	5.06e-35	TraesCS7A01G315500	chr7A	449734621	449737090	Adenylate kinase
	TRINITY_DN42362_c0_g1	8.60483	3.74e-07	7.24e-06	UP	NA	NA	NA	NA	NA	NA	NA	NA	NA	NA	NA
	TRINITY_DN59640_c0_g6	8.6041	8.77e-08	1.88e-06	UP	TRINITY_DN59640_c0_g6	TraesCS7B01G461600.1	1	269	942	1.22e-139	TraesCS7B01G461600	chr7B	718850191	718851616	receptor kinase 1
	TRINITY_DN44085_c0_g1	8.60328	5.5e-07	1.03e-05	UP	TRINITY_DN44085_c0_g1	TraesCS4A01G013000.1	32	373	555	4.52e-113	TraesCS4A01G013000	chr4A	7407677	7408327	Ubiquitin-fold modifier-conjugating enzyme 1
	TRINITY_DN33601_c0_g2	8.60017	2.22e-07	4.47e-06	UP	NA	NA	NA	NA	NA	NA	NA	NA	NA	NA	NA
	TRINITY_DN38538_c0_g1	8.59934	9.66e-07	1.73e-05	UP	NA	NA	NA	NA	NA	NA	NA	NA	NA	NA	NA
	TRINITY_DN202809_c0_g1	8.59931	1.06e-07	2.26e-06	UP	NA	NA	NA	NA	NA	NA	NA	NA	NA	NA	NA
	TRINITY_DN31083_c0_g1	8.59264	1.62e-07	3.33e-06	UP	TRINITY_DN31083_c0_g1	TraesCSU01G184200.1	590	1336	2178	0	TraesCSU01G184200	chrUn	278339631	278341907	NBS-LRR disease resistance protein
	TRINITY_DN60167_c0_g2	8.58943	3.89e-07	7.49e-06	UP	NA	NA	NA	NA	NA	NA	NA	NA	NA	NA	NA
	TRINITY_DN116148_c0_g1	8.58785	7.4e-07	1.35e-05	UP	NA	NA	NA	NA	NA	NA	NA	NA	NA	NA	NA
	TRINITY_DN106194_c0_g1	8.58631	1.11e-07	2.36e-06	UP	TRINITY_DN106194_c0_g1	TraesCS3A01G044400.1	790	1158	1158	0	TraesCS3A01G044400	chr3A	23900850	23903079	Apyrase
	TRINITY_DN42736_c0_g1	8.58388	1.3e-07	2.73e-06	UP	TRINITY_DN42736_c0_g1	TraesCS2A01G486800.1	573	483	576	8.14e-33	TraesCS2A01G486800	chr2A	721733999	721737945	ERD (early-responsive to dehydration stress) family protein
	TRINITY_DN49318_c0_g1	8.58284	1.35e-06	2.35e-05	UP	TRINITY_DN49318_c0_g1	TraesCS7D01G544000.1	1832	2076	2754	2.62e-88	TraesCS7D01G544000	chr7D	632020979	632024254	NBS-LRR-like resistance protein
	TRINITY_DN121911_c1_g1	8.58093	3.29e-06	5.23e-05	UP	TRINITY_DN121911_c1_g1	TraesCS7D01G136700.1	2200	1967	2238	1.42e-120	TraesCS7D01G136700	chr7D	87995875	87999118	Protein kinase family protein
	TRINITY_DN23934_c0_g4	8.57978	4.59e-07	8.74e-06	UP	TRINITY_DN23934_c0_g4	TraesCS5A01G414200.1	339	606	1827	5.09e-81	TraesCS5A01G414200	chr5A	602329703	602335639	Calmodulin-binding protein, putative, expressed
	TRINITY_DN41029_c0_g1	8.57978	4.59e-07	8.74e-06	UP	NA	NA	NA	NA	NA	NA	NA	NA	NA	NA	NA
	TRINITY_DN24419_c0_g1	8.57806	1.16e-07	2.46e-06	UP	NA	NA	NA	NA	NA	NA	NA	NA	NA	NA	NA
	TRINITY_DN49294_c0_g1	8.57777	2.38e-06	3.91e-05	UP	TRINITY_DN49294_c0_g1	TraesCS2D01G002200.1	85	1484	1491	0	TraesCS2D01G002200	chr2D	1912608	1922943	O-acyltransferase WSD1
	TRINITY_DN39691_c0_g1	8.57477	7.63e-07	1.39e-05	UP	NA	NA	NA	NA	NA	NA	NA	NA	NA	NA	NA
	TRINITY_DN24819_c0_g1	8.57467	1.57e-07	3.23e-06	UP	NA	NA	NA	NA	NA	NA	NA	NA	NA	NA	NA
	TRINITY_DN101483_c0_g1	8.57409	2.36e-07	4.73e-06	UP	NA	NA	NA	NA	NA	NA	NA	NA	NA	NA	NA
	TRINITY_DN94651_c0_g1	8.57409	2.36e-07	4.73e-06	UP	NA	NA	NA	NA	NA	NA	NA	NA	NA	NA	NA
	TRINITY_DN13100_c1_g1	8.5733	1.55e-06	2.66e-05	UP	TRINITY_DN13100_c1_g1	TraesCS3B01G598600.1	737	1575	1917	0	TraesCS3B01G598600	chr3B	820130589	820133259	Ankyrin repeat-containing protein
	TRINITY_DN66351_c1_g1	8.57319	1.25e-07	2.64e-06	UP	NA	NA	NA	NA	NA	NA	NA	NA	NA	NA	NA
	TRINITY_DN28479_c2_g1	8.57225	9.97e-07	1.78e-05	UP	TRINITY_DN28479_c2_g1	TraesCS5A01G003900.1	1	165	534	3.64e-82	TraesCS5A01G003900	chr5A	2727321	2728411	Thioesterase family protein
	TRINITY_DN76803_c0_g1	8.5714	2.23e-26	8.32e-24	UP	TRINITY_DN76803_c0_g1	TraesCS6B01G121100.1	1	621	621	0	TraesCS6B01G121100	chr6B	116112959	116113693	P-loop containing nucleoside triphosphate hydrolases superfamily protein
	TRINITY_DN63919_c0_g1	8.57138	3.33e-07	6.5e-06	UP	TRINITY_DN63919_c0_g1	TraesCS2A01G455200.1	1524	1610	1707	6.71e-28	TraesCS2A01G455200	chr2A	703877557	703881109	Glutamate receptor
	TRINITY_DN65966_c0_g1	8.57138	3.33e-07	6.5e-06	UP	TRINITY_DN65966_c0_g1	TraesCS7D01G422900.1	1	404	558	0	TraesCS7D01G422900	chr7D	543557544	543558263	transcription regulatory protein SNF5, putative (BSH)
	TRINITY_DN40837_c0_g1	8.57074	1.36e-07	2.84e-06	UP	TRINITY_DN40837_c0_g1	TraesCS7A01G015300.1	311	644	1725	1e-125	TraesCS7A01G015300	chr7A	6663885	6667126	receptor kinase 1
	TRINITY_DN64009_c0_g1	8.57074	1.36e-07	2.84e-06	UP	NA	NA	NA	NA	NA	NA	NA	NA	NA	NA	NA
	TRINITY_DN116910_c0_g1	8.56782	4.29e-06	6.62e-05	UP	NA	NA	NA	NA	NA	NA	NA	NA	NA	NA	NA
	TRINITY_DN121950_c0_g1	8.56732	1.37e-07	2.87e-06	UP	NA	NA	NA	NA	NA	NA	NA	NA	NA	NA	NA
	TRINITY_DN37835_c0_g4	8.56662	4.79e-07	9.09e-06	UP	NA	NA	NA	NA	NA	NA	NA	NA	NA	NA	NA
	TRINITY_DN116570_c0_g1	8.56641	2.51e-07	5.01e-06	UP	NA	NA	NA	NA	NA	NA	NA	NA	NA	NA	NA
	TRINITY_DN150086_c0_g1	8.56641	2.51e-07	5.01e-06	UP	NA	NA	NA	NA	NA	NA	NA	NA	NA	NA	NA
	TRINITY_DN3820_c0_g3	8.56624	2.26e-32	1.87e-29	UP	TRINITY_DN3820_c0_g3	TraesCS7D01G274700.1	24	154	942	3.18e-21	TraesCS7D01G274700	chr7D	264319784	264320725	DUF241 domain protein (DUF241)
	TRINITY_DN83556_c0_g2	8.56462	2.43e-06	3.98e-05	UP	NA	NA	NA	NA	NA	NA	NA	NA	NA	NA	NA
	TRINITY_DN77775_c0_g1	8.56393	2.17e-07	4.38e-06	UP	NA	NA	NA	NA	NA	NA	NA	NA	NA	NA	NA
	TRINITY_DN66012_c0_g1	8.56335	2.13e-07	4.3e-06	UP	TRINITY_DN66012_c0_g1	TraesCS5B01G429800.1	460	668	4035	1.01e-101	TraesCS5B01G429800	chr5B	605216678	605224894	Aldehyde oxidase, putative
	TRINITY_DN115915_c1_g1	8.56145	1.92e-07	3.9e-06	UP	TRINITY_DN115915_c1_g1	TraesCS2D01G522900.1	1	1137	1137	0	TraesCS2D01G522900	chr2D	611529158	611530365	PP2A regulatory subunit TAP46
	TRINITY_DN186606_c0_g1	8.56087	2.53e-07	5.04e-06	UP	NA	NA	NA	NA	NA	NA	NA	NA	NA	NA	NA
	TRINITY_DN89643_c0_g1	8.56011	2.01e-06	3.36e-05	UP	TRINITY_DN89643_c0_g1	TraesCS3D01G101600.1	2218	2140	2244	2.88e-20	TraesCS3D01G101600	chr3D	54629018	54631361	Leucine-rich repeat receptor-like protein kinase family protein
	TRINITY_DN76252_c1_g1	8.55995	1.42e-07	2.96e-06	UP	TRINITY_DN76252_c1_g1	TraesCS6B01G404700.1	33	376	1515	4.81e-92	TraesCS6B01G404700	chr6B	680306719	680310764	UDP-N-acetylglucosamine--N-acetylmuramyl-(Pentapeptide) pyrophosphoryl-undecaprenol N-acetylglucosamine transferase
	TRINITY_DN145400_c0_g1	8.55402	1.62e-07	3.33e-06	UP	NA	NA	NA	NA	NA	NA	NA	NA	NA	NA	NA
	TRINITY_DN41434_c0_g2	8.55334	5.02e-07	9.47e-06	UP	NA	NA	NA	NA	NA	NA	NA	NA	NA	NA	NA
	TRINITY_DN48251_c1_g1	8.55252	2e-07	4.07e-06	UP	NA	NA	NA	NA	NA	NA	NA	NA	NA	NA	NA
	TRINITY_DN33597_c0_g2	8.55155	1.58e-07	3.25e-06	UP	TRINITY_DN33597_c0_g2	TraesCS2B01G002200.1	9	885	2256	0	TraesCS2B01G002200	chr2B	1386371	1395906	receptor kinase 1
	TRINITY_DN65325_c0_g1	8.54987	8.24e-07	1.5e-05	UP	TRINITY_DN65325_c0_g1	TraesCS3B01G030600.1	986	1092	2082	9.9e-20	TraesCS3B01G030600	chr3B	13965118	13967400	Receptor-like kinase
	TRINITY_DN55825_c0_g1	8.54906	1.58e-07	3.25e-06	UP	NA	NA	NA	NA	NA	NA	NA	NA	NA	NA	NA
	TRINITY_DN77638_c0_g2	8.54875	3.3e-06	5.24e-05	UP	TRINITY_DN77638_c0_g2	TraesCS6D01G080900.1	712	831	831	1.41e-40	TraesCS6D01G080900	chr6D	46778835	46784330	F-box domain containing protein
	TRINITY_DN33396_c0_g1	8.54826	8.17e-07	1.48e-05	UP	TRINITY_DN33396_c0_g1	TraesCS5B01G422400.1	879	1538	5631	6.2e-169	TraesCS5B01G422400	chr5B	597289088	597305326	NBS-LRR-like resistance protein
	TRINITY_DN18072_c3_g1	8.54312	1.38e-06	2.4e-05	UP	NA	NA	NA	NA	NA	NA	NA	NA	NA	NA	NA
	TRINITY_DN189965_c0_g1	8.54159	1.85e-07	3.79e-06	UP	NA	NA	NA	NA	NA	NA	NA	NA	NA	NA	NA
	TRINITY_DN6915_c1_g1	8.53794	2.54e-06	4.14e-05	UP	NA	NA	NA	NA	NA	NA	NA	NA	NA	NA	NA
	TRINITY_DN60249_c0_g1	8.5356	1.83e-07	3.74e-06	UP	TRINITY_DN60249_c0_g1	TraesCS5A01G356700.1	995	1101	1419	1.51e-40	TraesCS5A01G356700	chr5A	559012838	559015737	Carboxyl-terminal-processing protease
	TRINITY_DN11892_c2_g2	8.53532	3.37e-06	5.33e-05	UP	NA	NA	NA	NA	NA	NA	NA	NA	NA	NA	NA
	TRINITY_DN21411_c1_g3	8.53309	1.86e-07	3.79e-06	UP	NA	NA	NA	NA	NA	NA	NA	NA	NA	NA	NA
	TRINITY_DN38435_c0_g2	8.53309	1.86e-07	3.79e-06	UP	TRINITY_DN38435_c0_g2	TraesCS5A01G276700.1	1922	1960	2706	3.05e-07	TraesCS5A01G276700	chr5A	485828496	485838943	Calcium-transporting ATPase
	TRINITY_DN42525_c0_g2	8.5313	6.89e-07	1.27e-05	UP	TRINITY_DN42525_c0_g2	TraesCS6B01G190800.1	1	2166	2166	0	TraesCS6B01G190800	chr6B	224210428	224212796	HAT transposon superfamily
	TRINITY_DN34057_c0_g1	8.52706	2.15e-07	4.35e-06	UP	NA	NA	NA	NA	NA	NA	NA	NA	NA	NA	NA
	TRINITY_DN114008_c1_g1	8.52177	3.44e-06	5.43e-05	UP	NA	NA	NA	NA	NA	NA	NA	NA	NA	NA	NA
	TRINITY_DN38220_c0_g1	8.52124	8.82e-07	1.59e-05	UP	TRINITY_DN38220_c0_g1	TraesCSU01G024000.1	1310	1610	2751	2.56e-119	TraesCSU01G024000	chrUn	24401845	24404677	NBS-LRR disease resistance protein, putative, expressed
	TRINITY_DN31018_c0_g1	8.52029	1.1e-06	1.94e-05	UP	TRINITY_DN31018_c0_g1	TraesCS2A01G459000.1	1	88	567	2.01e-39	TraesCS2A01G459000	chr2A	706217594	706218975	30S ribosomal protein S11
	TRINITY_DN133760_c0_g1	8.5198	4.45e-06	6.84e-05	UP	NA	NA	NA	NA	NA	NA	NA	NA	NA	NA	NA
	TRINITY_DN48000_c1_g1	8.51849	3.16e-07	6.2e-06	UP	TRINITY_DN48000_c1_g1	TraesCS2A01G569200.1	3303	3701	4662	1.09e-41	TraesCS2A01G569200	chr2A	767000368	767007273	receptor kinase 1
	TRINITY_DN77413_c0_g1	8.51849	3.16e-07	6.2e-06	UP	NA	NA	NA	NA	NA	NA	NA	NA	NA	NA	NA
	TRINITY_DN60172_c0_g1	8.51789	3.74e-07	7.22e-06	UP	TRINITY_DN60172_c0_g1	TraesCS7A01G055700.1	1	257	1929	6.93e-90	TraesCS7A01G055700	chr7A	26789350	26791464	Protein arginine N-methyltransferase HSL7
	TRINITY_DN97487_c0_g1	8.51715	3.47e-06	5.47e-05	UP	NA	NA	NA	NA	NA	NA	NA	NA	NA	NA	NA
	TRINITY_DN28929_c0_g1	8.51693	2.2e-07	4.43e-06	UP	NA	NA	NA	NA	NA	NA	NA	NA	NA	NA	NA
	TRINITY_DN35965_c1_g1	8.51602	1.47e-06	2.53e-05	UP	NA	NA	NA	NA	NA	NA	NA	NA	NA	NA	NA
	TRINITY_DN23902_c1_g1	8.5145	2.71e-06	4.39e-05	UP	NA	NA	NA	NA	NA	NA	NA	NA	NA	NA	NA
	TRINITY_DN73990_c0_g3	8.5145	2.71e-06	4.39e-05	UP	TRINITY_DN73990_c0_g3	TraesCS1A01G021100.1	392	1	1380	0	TraesCS1A01G021100	chr1A	10150917	10152296	Anthocyanin 5-aromatic acyltransferase
	TRINITY_DN140166_c0_g1	8.51439	2.33e-07	4.68e-06	UP	TRINITY_DN140166_c0_g1	TraesCS7A01G378800.1	1152	1216	1374	6.64e-25	TraesCS7A01G378800	chr7A	554477125	554481033	Polyamine oxidase
	TRINITY_DN142151_c0_g1	8.51186	2.13e-06	3.53e-05	UP	TRINITY_DN142151_c0_g1	TraesCS2D01G508100.1	43	301	879	2.04e-134	TraesCS2D01G508100	chr2D	601256591	601259430	Nuclease S1
	TRINITY_DN22446_c0_g3	8.51184	2.53e-07	5.05e-06	UP	NA	NA	NA	NA	NA	NA	NA	NA	NA	NA	NA
	TRINITY_DN22120_c0_g2	8.51083	2.43e-07	4.86e-06	UP	TRINITY_DN22120_c0_g2	TraesCS3A01G009200.1	1499	2222	3081	0	TraesCS3A01G009200	chr3A	8321632	8329985	NBS-LRR-like resistance protein
	TRINITY_DN55060_c2_g1	8.51083	2.43e-07	4.86e-06	UP	TRINITY_DN55060_c2_g1	TraesCS1D01G017800.1	660	568	1914	1.89e-35	TraesCS1D01G017800	chr1D	7877418	7880329	Receptor-like kinase
	TRINITY_DN153058_c0_g1	8.50922	1.68e-06	2.86e-05	UP	TRINITY_DN153058_c0_g1	TraesCS1D01G339400.1	289	84	1437	9.81e-102	TraesCS1D01G339400	chr1D	429491956	429493421	Glycosyltransferase
	TRINITY_DN42190_c0_g1	8.50922	1.68e-06	2.86e-05	UP	TRINITY_DN42190_c0_g1	TraesCSU01G112100.1	1	228	1275	3.52e-117	TraesCSU01G112100	chrUn	96206516	96208083	Serine/threonine-protein phosphatase 7 long form-like protein
	TRINITY_DN44248_c0_g1	8.50658	1.41e-06	2.45e-05	UP	NA	NA	NA	NA	NA	NA	NA	NA	NA	NA	NA
	TRINITY_DN103687_c0_g1	8.50611	5.79e-06	8.66e-05	UP	TRINITY_DN103687_c0_g1	TraesCS4A01G135100.3	1662	1728	2001	2.74e-24	TraesCS4A01G135100	chr4A	185429731	185436158	Vacuolar sorting receptor family protein
	TRINITY_DN80334_c0_g1	8.50611	5.79e-06	8.66e-05	UP	NA	NA	NA	NA	NA	NA	NA	NA	NA	NA	NA
	TRINITY_DN109673_c0_g3	8.50155	4.8e-07	9.11e-06	UP	TRINITY_DN109673_c0_g3	TraesCSU01G081800.1	847	1413	1413	3.84e-175	TraesCSU01G081800	chrUn	74778625	74782687	Serine/threonine-protein kinase
	TRINITY_DN72613_c0_g1	8.4987	7.52e-07	1.37e-05	UP	TRINITY_DN72613_c0_g1	TraesCS2B01G021800.1	1449	1884	1884	4.03e-157	TraesCS2B01G021800	chr2B	10586205	10592980	Receptor-like protein kinase
	TRINITY_DN34422_c0_g1	8.4985	2.26e-23	5.06e-21	UP	TRINITY_DN34422_c0_g1	TraesCS6B01G002800.1	1	211	519	8.51e-106	TraesCS6B01G002800	chr6B	2167276	2169107	Translationally-controlled tumor
	TRINITY_DN52339_c2_g1	8.49696	2.59e-06	4.22e-05	UP	TRINITY_DN52339_c2_g1	TraesCS5A01G121600.1	10426	10322	10899	6.16e-49	TraesCS5A01G121600	chr5A	263498712	263513761	E3 ubiquitin-protein ligase
	TRINITY_DN14735_c0_g2	8.49645	3.8e-23	8.21e-21	UP	TRINITY_DN14735_c0_g2	TraesCS1D01G029900.1	2243	3210	3210	0	TraesCS1D01G029900	chr1D	11658941	11662150	NBS-LRR disease resistance protein-like protein
	TRINITY_DN73074_c1_g1	8.49608	6.25e-07	1.16e-05	UP	TRINITY_DN73074_c1_g1	TraesCS3D01G002800.1	2539	2848	2898	5.43e-131	TraesCS3D01G002800	chr3D	1263808	1271900	Disease resistance protein (NBS-LRR class) family
	TRINITY_DN121921_c0_g1	8.49545	3.12e-07	6.13e-06	UP	TRINITY_DN121921_c0_g1	TraesCS7D01G175600.1	315	545	831	1.5e-95	TraesCS7D01G175600	chr7D	127649317	127652346	12-oxophytodienoate reductase
	TRINITY_DN41602_c0_g1	8.49545	3.12e-07	6.13e-06	UP	NA	NA	NA	NA	NA	NA	NA	NA	NA	NA	NA
	TRINITY_DN56612_c0_g1	8.49545	3.12e-07	6.13e-06	UP	TRINITY_DN56612_c0_g1	TraesCS4D01G148900.1	312	401	402	1.67e-20	TraesCS4D01G148900	chr4D	150970208	150977214	Glutathione synthetase
	TRINITY_DN46429_c0_g1	8.49442	2.76e-07	5.49e-06	UP	TRINITY_DN46429_c0_g1	TraesCS2D01G042200.1	1	666	3180	0	TraesCS2D01G042200	chr2D	15113231	15116657	Disease resistance protein
	TRINITY_DN122291_c2_g1	8.49428	3.42e-06	5.4e-05	UP	TRINITY_DN122291_c2_g1	TraesCS7A01G006200.1	2188	2462	3252	3.07e-68	TraesCS7A01G006200	chr7A	3000183	3005020	Disease resistance protein
	TRINITY_DN145074_c1_g2	8.49275	1.72e-06	2.92e-05	UP	NA	NA	NA	NA	NA	NA	NA	NA	NA	NA	NA
	TRINITY_DN17239_c0_g4	8.49275	1.72e-06	2.92e-05	UP	NA	NA	NA	NA	NA	NA	NA	NA	NA	NA	NA
	TRINITY_DN32564_c0_g1	8.49086	4.83e-07	9.16e-06	UP	NA	NA	NA	NA	NA	NA	NA	NA	NA	NA	NA
	TRINITY_DN191002_c0_g1	8.48959	5.87e-06	8.76e-05	UP	NA	NA	NA	NA	NA	NA	NA	NA	NA	NA	NA
	TRINITY_DN48942_c0_g1	8.48959	5.87e-06	8.76e-05	UP	TRINITY_DN48942_c0_g1	TraesCS7D01G428900.1	1	165	654	4.51e-82	TraesCS7D01G428900	chr7D	548915170	548916089	Germin-like protein 1
	TRINITY_DN65503_c0_g2	8.48926	2.9e-07	5.74e-06	UP	TRINITY_DN65503_c0_g2	TraesCS7D01G452200.1	1646	1947	2904	2.98e-158	TraesCS7D01G452200	chr7D	571882057	571885421	Disease resistance protein (NBS-LRR class) family
	TRINITY_DN52483_c0_g1	8.48743	1.17e-06	2.07e-05	UP	TRINITY_DN52483_c0_g1	TraesCS1A01G426000.2	655	1126	2649	0	TraesCS1A01G426000	chr1A	580739950	580743663	Disease resistance protein (NBS-LRR class) family
	TRINITY_DN81242_c0_g2	8.48688	4.58e-06	7e-05	UP	NA	NA	NA	NA	NA	NA	NA	NA	NA	NA	NA
	TRINITY_DN98178_c0_g1	8.48688	4.58e-06	7e-05	UP	TRINITY_DN98178_c0_g1	TraesCS5B01G357200.1	59	336	2631	5.98e-145	TraesCS5B01G357200	chr5B	536587125	536589755	Protein PLASTID MOVEMENT IMPAIRED 1
	TRINITY_DN16066_c2_g1	8.48667	3e-07	5.9e-06	UP	TRINITY_DN16066_c2_g1	TraesCS7D01G465800.1	308	743	1653	0	TraesCS7D01G465800	chr7D	579761084	579764000	Disease resistance protein (NBS-LRR class) family
	TRINITY_DN218031_c0_g1	8.48667	3e-07	5.9e-06	UP	NA	NA	NA	NA	NA	NA	NA	NA	NA	NA	NA
	TRINITY_DN24954_c0_g1	8.48573	2.04e-06	3.39e-05	UP	TRINITY_DN24954_c0_g1	TraesCS2B01G204200.1	926	1077	1077	1.01e-71	TraesCS2B01G204200	chr2B	184114202	184119171	Alpha/beta hydrolase, putative
	TRINITY_DN27122_c0_g1	8.48573	2.04e-06	3.39e-05	UP	TRINITY_DN27122_c0_g1	TraesCS3B01G003100.1	165	698	2253	0	TraesCS3B01G003100	chr3B	2279508	2287705	Tripartite motif-containing protein 29
	TRINITY_DN59104_c0_g1	8.48573	2.04e-06	3.39e-05	UP	NA	NA	NA	NA	NA	NA	NA	NA	NA	NA	NA
	TRINITY_DN40626_c0_g2	8.48502	6.21e-07	1.15e-05	UP	NA	NA	NA	NA	NA	NA	NA	NA	NA	NA	NA
	TRINITY_DN192388_c0_g1	8.48304	2.66e-06	4.32e-05	UP	NA	NA	NA	NA	NA	NA	NA	NA	NA	NA	NA
	TRINITY_DN50292_c0_g1	8.48043	3.28e-07	6.42e-06	UP	TRINITY_DN50292_c0_g1	TraesCS1B01G011800.1	2067	2425	3156	8.33e-105	TraesCS1B01G011800	chr1B	5696043	5699374	Pm3-like disease resistance protein
	TRINITY_DN50464_c2_g1	8.48043	3.28e-07	6.42e-06	UP	NA	NA	NA	NA	NA	NA	NA	NA	NA	NA	NA
	TRINITY_DN65698_c1_g2	8.48034	3.5e-06	5.52e-05	UP	NA	NA	NA	NA	NA	NA	NA	NA	NA	NA	NA
	TRINITY_DN51668_c1_g1	8.47973	9.51e-07	1.71e-05	UP	TRINITY_DN51668_c1_g1	TraesCS7D01G457800.1	2420	2490	2490	1.03e-29	TraesCS7D01G457800	chr7D	575865501	575871583	Molybdenum cofactor sulfurase
	TRINITY_DN70824_c0_g1	8.47973	9.51e-07	1.71e-05	UP	TRINITY_DN70824_c0_g1	TraesCS2A01G383600.1	2	82	408	7.27e-29	TraesCS2A01G383600	chr2A	628582526	628584673	60S ribosomal protein L14, putative
	TRINITY_DN68851_c0_g1	8.47782	3.17e-07	6.21e-06	UP	TRINITY_DN68851_c0_g1	TraesCSU01G046800.6	1	285	333	2e-98	TraesCSU01G046800	chrUn	36551707	36554129	Unknown protein
	TRINITY_DN121083_c0_g1	8.47521	3.36e-07	6.56e-06	UP	TRINITY_DN121083_c0_g1	TraesCS4A01G447900.1	1745	2088	2625	1.57e-166	TraesCS4A01G447900	chr4A	714564518	714568286	NBS-LRR disease resistance protein
	TRINITY_DN73353_c0_g1	8.47421	5.23e-07	9.84e-06	UP	TRINITY_DN73353_c0_g1	TraesCS7B01G410200.1	472	167	1086	1.81e-160	TraesCS7B01G410200	chr7B	679490382	679491467	COP1-interacting protein 4.1
	TRINITY_DN99953_c0_g1	8.4734	1.51e-06	2.59e-05	UP	NA	NA	NA	NA	NA	NA	NA	NA	NA	NA	NA
	TRINITY_DN17374_c2_g3	8.4726	3.43e-07	6.68e-06	UP	TRINITY_DN17374_c2_g3	TraesCS3B01G019300.1	1	36	1038	4.33e-10	TraesCS3B01G019300	chr3B	8133732	8137409	Protein-lysine N-methyltransferase
	TRINITY_DN23054_c0_g2	8.46898	2.74e-06	4.44e-05	UP	TRINITY_DN23054_c0_g2	TraesCS7A01G008500.1	1	48	2766	3.6e-17	TraesCS7A01G008500	chr7A	3840621	3844152	NBS-LRR-like resistance protein
	TRINITY_DN3404_c3_g3	8.46894	4.21e-07	8.07e-06	UP	NA	NA	NA	NA	NA	NA	NA	NA	NA	NA	NA
	TRINITY_DN20590_c0_g1	8.4663	3.91e-07	7.54e-06	UP	TRINITY_DN20590_c0_g1	TraesCS3B01G298400.1	221	1890	1890	0	TraesCS3B01G298400	chr3B	478556935	478559737	70 kDa heat shock protein
	TRINITY_DN21534_c0_g2	8.4663	3.91e-07	7.54e-06	UP	NA	NA	NA	NA	NA	NA	NA	NA	NA	NA	NA
	TRINITY_DN25616_c0_g3	8.4663	3.91e-07	7.54e-06	UP	NA	NA	NA	NA	NA	NA	NA	NA	NA	NA	NA
	TRINITY_DN33712_c1_g2	8.46562	1e-06	1.78e-05	UP	TRINITY_DN33712_c1_g2	TraesCS7B01G426700.1	326	570	570	3.35e-126	TraesCS7B01G426700	chr7B	695954237	695954806	F-box domain containing protein
	TRINITY_DN111159_c0_g1	8.46367	3.73e-07	7.22e-06	UP	NA	NA	NA	NA	NA	NA	NA	NA	NA	NA	NA
	TRINITY_DN47511_c0_g3	8.46367	3.73e-07	7.22e-06	UP	TRINITY_DN47511_c0_g3	TraesCS2B01G047100.1	721	832	933	1.5e-52	TraesCS2B01G047100	chr2B	23549342	23550688	Nicotianamine synthase
	TRINITY_DN221222_c0_g1	8.46196	2.29e-06	3.77e-05	UP	TRINITY_DN221222_c0_g1	TraesCS4D01G276000.1	18	226	342	9.9e-107	TraesCS4D01G276000	chr4D	446916086	446916533	EPIDERMAL PATTERNING FACTOR-like protein
	TRINITY_DN12779_c3_g1	8.46003	6.07e-07	1.13e-05	UP	NA	NA	NA	NA	NA	NA	NA	NA	NA	NA	NA
	TRINITY_DN68339_c0_g2	8.45751	2.18e-06	3.6e-05	UP	TRINITY_DN68339_c0_g2	TraesCS7A01G402800.1	160	88	264	5.18e-17	TraesCS7A01G402800	chr7A	582569207	582569622	glucan synthase-like 3
	TRINITY_DN43013_c0_g2	8.45575	4.08e-07	7.84e-06	UP	TRINITY_DN43013_c0_g2	TraesCS2B01G625900.1	1370	2145	2145	0	TraesCS2B01G625900	chr2B	798390724	798392868	NBS-LRR resistance-like protein
	TRINITY_DN49715_c0_g1	8.45111	1.05e-06	1.87e-05	UP	TRINITY_DN49715_c0_g1	TraesCSU01G012600.1	4259	4386	4398	6.22e-53	TraesCSU01G012600	chrUn	15911554	15920276	NBS-LRR disease resistance protein-like protein
	TRINITY_DN81663_c1_g1	8.45044	4.74e-07	9e-06	UP	TRINITY_DN81663_c1_g1	TraesCSU01G165600.1	174	473	2796	1.83e-135	TraesCSU01G165600	chrUn	241198052	241208084	Disease resistance protein RPM1
	TRINITY_DN37621_c0_g1	8.44938	4.42e-07	8.45e-06	UP	TRINITY_DN37621_c0_g1	TraesCS7A01G038900.1	3027	3090	3090	3.07e-25	TraesCS7A01G038900	chr7A	17422267	17425799	NBS-LRR disease resistance protein
	TRINITY_DN55132_c0_g1	8.44938	4.42e-07	8.45e-06	UP	NA	NA	NA	NA	NA	NA	NA	NA	NA	NA	NA
	TRINITY_DN85487_c0_g2	8.44938	4.42e-07	8.45e-06	UP	TRINITY_DN85487_c0_g2	TraesCS7D01G407100.1	380	225	702	3.93e-77	TraesCS7D01G407100	chr7D	524325347	524326340	Thylakoid lumenal 16.5 kDa protein, chloroplastic
	TRINITY_DN63848_c0_g1	8.44671	4.28e-07	8.2e-06	UP	NA	NA	NA	NA	NA	NA	NA	NA	NA	NA	NA
	TRINITY_DN127835_c0_g1	8.44593	1.67e-06	2.84e-05	UP	TRINITY_DN127835_c0_g1	TraesCS2D01G567500.1	889	1615	3135	0	TraesCS2D01G567500	chr2D	635871762	635876176	NBS-LRR disease resistance protein
	TRINITY_DN11186_c2_g1	8.44494	2.35e-06	3.87e-05	UP	NA	NA	NA	NA	NA	NA	NA	NA	NA	NA	NA
	TRINITY_DN175238_c0_g1	8.44494	2.35e-06	3.87e-05	UP	NA	NA	NA	NA	NA	NA	NA	NA	NA	NA	NA
	TRINITY_DN92572_c0_g1	8.44301	7.01e-07	1.29e-05	UP	TRINITY_DN92572_c0_g1	TraesCS6B01G019700.1	1001	1110	1110	1.41e-51	TraesCS6B01G019700	chr6B	11794155	11795264	Leucine-rich repeat receptor-like protein kinase family protein
	TRINITY_DN113389_c0_g1	8.44043	2.92e-06	4.7e-05	UP	TRINITY_DN113389_c0_g1	TraesCS2B01G021900.1	36	274	963	1.16e-101	TraesCS2B01G021900	chr2B	10595976	10598879	receptor kinase 1
	TRINITY_DN62616_c0_g1	8.44043	2.92e-06	4.7e-05	UP	TRINITY_DN62616_c0_g1	TraesCS7A01G073300.1	382	843	954	0	TraesCS7A01G073300	chr7A	38769982	38771810	Xanthine phosphoribosyltransferase
	TRINITY_DN67805_c0_g1	8.44043	2.92e-06	4.7e-05	UP	NA	NA	NA	NA	NA	NA	NA	NA	NA	NA	NA
	TRINITY_DN72236_c0_g1	8.44032	6.23e-07	1.16e-05	UP	TRINITY_DN72236_c0_g1	TraesCS5D01G466100.1	2137	2187	2187	4.13e-17	TraesCS5D01G466100	chr5D	508613202	508617758	Acetyl-coenzyme A synthetase
	TRINITY_DN31471_c0_g1	8.4387	4.89e-07	9.26e-06	UP	NA	NA	NA	NA	NA	NA	NA	NA	NA	NA	NA
	TRINITY_DN30320_c0_g1	8.43697	1.12e-06	1.97e-05	UP	NA	NA	NA	NA	NA	NA	NA	NA	NA	NA	NA
	TRINITY_DN60549_c0_g1	8.43671	1.34e-06	2.33e-05	UP	NA	NA	NA	NA	NA	NA	NA	NA	NA	NA	NA
	TRINITY_DN80643_c0_g1	8.43607	4.84e-06	7.36e-05	UP	TRINITY_DN80643_c0_g1	TraesCS7D01G517100.1	1	188	1581	2.7e-73	TraesCS7D01G517100	chr7D	616219269	616221560	F-box family protein
	TRINITY_DN117027_c0_g3	8.43602	5.28e-07	9.93e-06	UP	TRINITY_DN117027_c0_g3	TraesCS7D01G441200.1	914	703	1131	5.57e-108	TraesCS7D01G441200	chr7D	560747957	560753810	Zinc finger CCCH domain protein
	TRINITY_DN109514_c0_g1	8.43494	5.27e-07	9.92e-06	UP	TRINITY_DN109514_c0_g1	TraesCS2D01G545500.1	2521	2595	2595	8.14e-32	TraesCS2D01G545500	chr2D	622306303	622319108	Cyclopropane-fatty-acyl-phospholipid synthase
	TRINITY_DN44561_c0_g3	8.43494	5.27e-07	9.92e-06	UP	NA	NA	NA	NA	NA	NA	NA	NA	NA	NA	NA
	TRINITY_DN229932_c0_g1	8.43424	1.38e-06	2.4e-05	UP	NA	NA	NA	NA	NA	NA	NA	NA	NA	NA	NA
	TRINITY_DN20171_c0_g2	8.43332	5.85e-07	1.09e-05	UP	TRINITY_DN20171_c0_g2	TraesCS3D01G034900.1	3047	3099	3099	4.23e-18	TraesCS3D01G034900	chr3D	12749686	12752784	Leucine-rich repeat receptor-like protein kinase family protein
	TRINITY_DN71034_c0_g1	8.43332	5.85e-07	1.09e-05	UP	TRINITY_DN71034_c0_g1	TraesCS7A01G406100.1	1242	1295	1665	2.12e-20	TraesCS7A01G406100	chr7A	589751769	589756038	Lysophosphatidylcholine acyltransferase 1
	TRINITY_DN29909_c0_g2	8.43328	3.82e-06	5.97e-05	UP	NA	NA	NA	NA	NA	NA	NA	NA	NA	NA	NA
	TRINITY_DN11854_c1_g3	8.43225	5.04e-07	9.52e-06	UP	NA	NA	NA	NA	NA	NA	NA	NA	NA	NA	NA
	TRINITY_DN21883_c0_g2	8.43125	9.43e-07	1.69e-05	UP	NA	NA	NA	NA	NA	NA	NA	NA	NA	NA	NA
	TRINITY_DN101530_c0_g1	8.4305	3.04e-06	4.86e-05	UP	TRINITY_DN101530_c0_g1	TraesCS5D01G546700.1	972	1182	1971	7.73e-108	TraesCS5D01G546700	chr5D	555190958	555192928	Receptor lectin kinase
	TRINITY_DN87398_c0_g1	8.42956	4.95e-07	9.37e-06	UP	TRINITY_DN87398_c0_g1	TraesCS1D01G424800.1	4006	4245	5022	3.22e-112	TraesCS1D01G424800	chr1D	478967305	478980814	Disease resistance protein RPM1
	TRINITY_DN81844_c0_g3	8.42852	8.13e-07	1.48e-05	UP	TRINITY_DN81844_c0_g3	TraesCS7B01G351900.1	282	340	357	2.57e-23	TraesCS7B01G351900	chr7B	608470232	608470858	Protease inhibitor/seed storage/lipid transfer family protein
	TRINITY_DN78474_c0_g1	8.42772	2.43e-06	3.98e-05	UP	NA	NA	NA	NA	NA	NA	NA	NA	NA	NA	NA
	TRINITY_DN171637_c0_g1	8.42686	5e-07	9.44e-06	UP	TRINITY_DN171637_c0_g1	TraesCS3D01G472000.1	2085	2241	2241	3.57e-48	TraesCS3D01G472000	chr3D	574118446	574125468	Receptor-like protein kinase, putative,expressed
	TRINITY_DN45173_c0_g2	8.42686	5e-07	9.44e-06	UP	NA	NA	NA	NA	NA	NA	NA	NA	NA	NA	NA
	TRINITY_DN110268_c0_g1	8.42595	3.02e-06	4.84e-05	UP	NA	NA	NA	NA	NA	NA	NA	NA	NA	NA	NA
	TRINITY_DN103322_c0_g1	8.42518	9.79e-07	1.75e-05	UP	TRINITY_DN103322_c0_g1	TraesCS7B01G427800.1	2191	2468	4485	6.07e-135	TraesCS7B01G427800	chr7B	697073102	697081669	Receptor-like protein kinase
	TRINITY_DN42918_c0_g4	8.42243	1.18e-06	2.08e-05	UP	TRINITY_DN42918_c0_g4	TraesCS4D01G360400.1	486	802	1215	3.18e-148	TraesCS4D01G360400	chr4D	507348383	507352504	F-box protein
	TRINITY_DN60358_c0_g1	8.42145	5.92e-07	1.1e-05	UP	TRINITY_DN60358_c0_g1	TraesCS1D01G409900.1	428	325	558	1.02e-35	TraesCS1D01G409900	chr1D	471606088	471606857	Beta-adaptin-like protein
	TRINITY_DN944_c2_g1	8.41941	1.41e-06	2.44e-05	UP	TRINITY_DN944_c2_g1	TraesCS1B01G372800.1	2364	2550	2550	2e-87	TraesCS1B01G372800	chr1B	603261188	603263737	Serine/threonine-protein kinase
	TRINITY_DN185309_c0_g1	8.41873	6.48e-07	1.2e-05	UP	NA	NA	NA	NA	NA	NA	NA	NA	NA	NA	NA
	TRINITY_DN83116_c0_g1	8.41873	6.48e-07	1.2e-05	UP	TRINITY_DN83116_c0_g1	TraesCS2B01G112800.1	890	960	960	6.09e-30	TraesCS2B01G112800	chr2B	75990473	75991871	Hexosyltransferase
	TRINITY_DN14750_c0_g2	8.4169	1.82e-06	3.07e-05	UP	TRINITY_DN14750_c0_g2	TraesCS6A01G385700.1	240	298	423	1.58e-19	TraesCS6A01G385700	chr6A	603191897	603194004	50S ribosomal protein L14
	TRINITY_DN153374_c0_g1	8.4169	1.82e-06	3.07e-05	UP	TRINITY_DN153374_c0_g1	TraesCS2A01G122900.1	1	116	648	8.11e-55	TraesCS2A01G122900	chr2A	72735563	72736304	Short-chain dehydrogenase/reductase
	TRINITY_DN21461_c0_g2	8.4169	1.82e-06	3.07e-05	UP	TRINITY_DN21461_c0_g2	TraesCS7D01G542200.1	860	2222	4110	0	TraesCS7D01G542200	chr7D	631424356	631428465	NBS-LRR disease resistance protein-like protein
	TRINITY_DN50386_c1_g2	8.41492	5.79e-07	1.08e-05	UP	TRINITY_DN50386_c1_g2	TraesCS7A01G012600.1	55	153	207	1.32e-22	TraesCS7A01G012600	chr7A	5472092	5472519	30S ribosomal protein S18, chloroplastic
	TRINITY_DN65524_c0_g1	8.41492	5.79e-07	1.08e-05	UP	NA	NA	NA	NA	NA	NA	NA	NA	NA	NA	NA
	TRINITY_DN71747_c0_g1	8.4131	3.13e-06	4.99e-05	UP	NA	NA	NA	NA	NA	NA	NA	NA	NA	NA	NA
	TRINITY_DN84921_c0_g3	8.41131	2.96e-06	4.76e-05	UP	TRINITY_DN84921_c0_g3	TraesCS2B01G571300.1	704	1206	1206	0	TraesCS2B01G571300	chr2B	761846447	761847910	Exocyst complex component, putative
	TRINITY_DN140689_c0_g1	8.41113	8.81e-07	1.59e-05	UP	TRINITY_DN140689_c0_g1	TraesCS5D01G543000.1	3212	3312	3312	1.65e-46	TraesCS5D01G543000	chr5D	553469688	553473100	Receptor-kinase, putative
	TRINITY_DN34147_c0_g1	8.41113	8.81e-07	1.59e-05	UP	TRINITY_DN34147_c0_g1	TraesCS7D01G452200.1	1378	1600	2904	1.76e-114	TraesCS7D01G452200	chr7D	571882057	571885421	Disease resistance protein (NBS-LRR class) family
	TRINITY_DN70887_c0_g1	8.41029	2.52e-06	4.11e-05	UP	NA	NA	NA	NA	NA	NA	NA	NA	NA	NA	NA
	TRINITY_DN93107_c0_g1	8.40947	5.92e-07	1.1e-05	UP	TRINITY_DN93107_c0_g1	TraesCS7D01G550700.1	60	123	1767	7.83e-21	TraesCS7D01G550700	chr7D	634684304	634689376	Delta(24)-sterol reductase
	TRINITY_DN124111_c0_g1	8.40838	8.37e-07	1.52e-05	UP	TRINITY_DN124111_c0_g1	TraesCS3B01G534900.1	2123	2175	2175	7.65e-20	TraesCS3B01G534900	chr3B	774164133	774171253	Crossover junction endonuclease mus81
	TRINITY_DN47920_c0_g2	8.40774	1.26e-06	2.21e-05	UP	NA	NA	NA	NA	NA	NA	NA	NA	NA	NA	NA
	TRINITY_DN98715_c0_g1	8.40216	1.92e-06	3.21e-05	UP	NA	NA	NA	NA	NA	NA	NA	NA	NA	NA	NA
	TRINITY_DN110126_c0_g1	8.3991	1.26e-06	2.21e-05	UP	TRINITY_DN110126_c0_g1	TraesCS4B01G390400.2	255	547	624	2.61e-106	TraesCS4B01G390400	chr4B	666571620	666574354	Polyubiquitin
	TRINITY_DN30671_c0_g3	8.39738	6.71e-07	1.24e-05	UP	NA	NA	NA	NA	NA	NA	NA	NA	NA	NA	NA
	TRINITY_DN264776_c0_g1	8.39462	6.79e-07	1.25e-05	UP	NA	NA	NA	NA	NA	NA	NA	NA	NA	NA	NA
	TRINITY_DN29926_c1_g1	8.39462	6.79e-07	1.25e-05	UP	NA	NA	NA	NA	NA	NA	NA	NA	NA	NA	NA
	TRINITY_DN4537_c1_g2	8.39462	6.79e-07	1.25e-05	UP	NA	NA	NA	NA	NA	NA	NA	NA	NA	NA	NA
	TRINITY_DN48987_c1_g1	8.39462	6.79e-07	1.25e-05	UP	TRINITY_DN48987_c1_g1	TraesCS6D01G384900.1	2535	2637	2637	8.37e-48	TraesCS6D01G384900	chr6D	462862424	462867403	Disease resistance protein (NBS-LRR class) family
	TRINITY_DN87355_c0_g2	8.39368	3.96e-06	6.16e-05	UP	TRINITY_DN87355_c0_g2	TraesCS1A01G028700.1	1	61	1131	7.49e-24	TraesCS1A01G028700	chr1A	13453280	13455266	Disease resistance protein (TIR-NBS-LRR class) family
	TRINITY_DN78493_c0_g1	8.39265	2.61e-06	4.25e-05	UP	TRINITY_DN78493_c0_g1	TraesCS5A01G067300.1	5171	5248	9045	3.29e-25	TraesCS5A01G067300	chr5A	74738855	74752095	Kinesin-like protein
	TRINITY_DN28799_c0_g1	8.39075	9.23e-07	1.66e-05	UP	TRINITY_DN28799_c0_g1	TraesCS2D01G016900.1	1019	1509	1515	1.09e-147	TraesCS2D01G016900	chr2D	8281361	8289251	LIM domain-containing protein 1
	TRINITY_DN61505_c0_g1	8.38982	2.27e-06	3.75e-05	UP	TRINITY_DN61505_c0_g1	TraesCS2A01G465900.1	669	1851	2157	0	TraesCS2A01G465900	chr2A	710460293	710484613	receptor kinase 1
	TRINITY_DN66223_c0_g1	8.38982	2.27e-06	3.75e-05	UP	TRINITY_DN66223_c0_g1	TraesCS7D01G549500.1	1726	1912	2214	9.58e-88	TraesCS7D01G549500	chr7D	634184721	634187181	Leucine-rich repeat receptor-like protein kinase family protein, putative
	TRINITY_DN42941_c0_g1	8.38443	2.53e-06	4.13e-05	UP	TRINITY_DN42941_c0_g1	TraesCS1B01G429900.1	155	389	510	2.14e-67	TraesCS1B01G429900	chr1B	654382537	654385302	Phytoene synthase
	TRINITY_DN70150_c0_g1	8.38241	7.84e-07	1.43e-05	UP	TRINITY_DN70150_c0_g1	TraesCS7D01G543200.2	2280	2515	2568	5.28e-105	TraesCS7D01G543200	chr7D	631845872	631849976	Phosphatidylinositol-4-phosphate 5-kinase, putative
	TRINITY_DN59867_c3_g3	8.38135	1.35e-06	2.36e-05	UP	TRINITY_DN59867_c3_g3	TraesCS5D01G204900.1	1448	1503	1503	1.22e-16	TraesCS5D01G204900	chr5D	310496797	310501360	Glycosyltransferase
	TRINITY_DN50172_c0_g1	8.38054	4.16e-06	6.43e-05	UP	NA	NA	NA	NA	NA	NA	NA	NA	NA	NA	NA
	TRINITY_DN67265_c0_g3	8.37962	7.83e-07	1.43e-05	UP	TRINITY_DN67265_c0_g3	TraesCS2B01G036700.1	1286	1965	1965	0	TraesCS2B01G036700	chr2B	17394685	17399842	receptor kinase 1
	TRINITY_DN37212_c0_g1	8.37871	4.1e-06	6.36e-05	UP	NA	NA	NA	NA	NA	NA	NA	NA	NA	NA	NA
	TRINITY_DN64130_c0_g2	8.37871	4.1e-06	6.36e-05	UP	NA	NA	NA	NA	NA	NA	NA	NA	NA	NA	NA
	TRINITY_DN74140_c0_g1	8.37871	4.1e-06	6.36e-05	UP	NA	NA	NA	NA	NA	NA	NA	NA	NA	NA	NA
	TRINITY_DN252957_c0_g1	8.3779	1.36e-06	2.37e-05	UP	NA	NA	NA	NA	NA	NA	NA	NA	NA	NA	NA
	TRINITY_DN61231_c0_g1	8.37572	1.05e-06	1.87e-05	UP	TRINITY_DN61231_c0_g1	TraesCS6A01G414700.1	630	930	933	1.01e-156	TraesCS6A01G414700	chr6A	614819128	614821625	receptor-like protein kinase 1
	TRINITY_DN27330_c0_g1	8.37506	1.64e-06	2.79e-05	UP	TRINITY_DN27330_c0_g1	TraesCS5B01G350300.1	1	348	348	0	TraesCS5B01G350300	chr5B	531217275	531217622	1-(5-phosphoribosyl)-5-[(5-phosphoribosylamino)methylideneamino] imidazole-4-carboxamide isomerase
	TRINITY_DN40025_c0_g3	8.37506	1.64e-06	2.79e-05	UP	NA	NA	NA	NA	NA	NA	NA	NA	NA	NA	NA
	TRINITY_DN36373_c2_g1	8.37403	9.1e-07	1.64e-05	UP	NA	NA	NA	NA	NA	NA	NA	NA	NA	NA	NA
	TRINITY_DN117973_c0_g2	8.3729	1.03e-06	1.83e-05	UP	NA	NA	NA	NA	NA	NA	NA	NA	NA	NA	NA
	TRINITY_DN15522_c2_g1	8.37123	9.87e-07	1.76e-05	UP	NA	NA	NA	NA	NA	NA	NA	NA	NA	NA	NA
	TRINITY_DN44244_c0_g2	8.37009	9.6e-07	1.72e-05	UP	NA	NA	NA	NA	NA	NA	NA	NA	NA	NA	NA
	TRINITY_DN101970_c1_g3	8.36935	2.65e-06	4.31e-05	UP	NA	NA	NA	NA	NA	NA	NA	NA	NA	NA	NA
	TRINITY_DN239_c1_g1	8.36935	2.65e-06	4.31e-05	UP	NA	NA	NA	NA	NA	NA	NA	NA	NA	NA	NA
	TRINITY_DN6006_c0_g2	8.36728	9.22e-07	1.66e-05	UP	NA	NA	NA	NA	NA	NA	NA	NA	NA	NA	NA
	TRINITY_DN88792_c0_g1	8.36558	1.25e-06	2.2e-05	UP	TRINITY_DN88792_c0_g1	TraesCS6D01G365500.1	676	454	957	1.77e-109	TraesCS6D01G365500	chr6D	454653870	454654826	P-loop containing nucleoside triphosphate hydrolases superfamily protein
	TRINITY_DN29954_c0_g1	8.36544	5.35e-06	8.06e-05	UP	TRINITY_DN29954_c0_g1	TraesCS7B01G171400.1	89	222	402	1.16e-37	TraesCS7B01G171400	chr7B	244282610	244283481	Methionine aminopeptidase
	TRINITY_DN39138_c0_g3	8.36446	9.09e-07	1.64e-05	UP	TRINITY_DN39138_c0_g3	TraesCS3D01G395500.1	40	304	357	2.3e-89	TraesCS3D01G395500	chr3D	511255831	511256187	Flagellar hook-length control protein
	TRINITY_DN22188_c1_g1	8.36337	1.46e-06	2.52e-05	UP	NA	NA	NA	NA	NA	NA	NA	NA	NA	NA	NA
	TRINITY_DN79022_c1_g2	8.36164	9.22e-07	1.66e-05	UP	TRINITY_DN79022_c1_g2	TraesCS3B01G184000.2	22	98	1479	2.52e-23	TraesCS3B01G184000	chr3B	197790160	197794489	F-box family protein
	TRINITY_DN80524_c2_g1	8.35988	1.75e-06	2.96e-05	UP	TRINITY_DN80524_c2_g1	TraesCS1A01G416600.1	218	114	270	8.19e-49	TraesCS1A01G416600	chr1A	574934591	574935614	Transcription elongation factor 1
	TRINITY_DN53265_c0_g1	8.35962	3.48e-06	5.48e-05	UP	TRINITY_DN53265_c0_g1	TraesCS7B01G343100.1	404	643	1032	1.49e-110	TraesCS7B01G343100	chr7B	598464571	598467104	SKP1-like protein 4
	TRINITY_DN23288_c0_g1	8.35882	9.62e-07	1.72e-05	UP	TRINITY_DN23288_c0_g1	TraesCS7D01G512900.1	1	124	2613	4.75e-59	TraesCS7D01G512900	chr7D	614349589	614352829	Receptor protein kinase-like protein
	TRINITY_DN82797_c0_g2	8.35598	1.1e-06	1.95e-05	UP	TRINITY_DN82797_c0_g2	TraesCS2D01G129300.1	729	519	729	1.39e-63	TraesCS2D01G129300	chr2D	75093183	75097025	RING finger protein
	TRINITY_DN51390_c0_g2	8.35383	2.51e-06	4.1e-05	UP	TRINITY_DN51390_c0_g2	TraesCS7D01G258000.1	720	514	729	5.97e-99	TraesCS7D01G258000	chr7D	233867661	233870060	RPM1-interacting protein 4
	TRINITY_DN243017_c0_g1	8.35199	1.09e-06	1.93e-05	UP	TRINITY_DN243017_c0_g1	TraesCS5A01G543000.1	1396	1482	1482	9.23e-39	TraesCS5A01G543000	chr5A	698645987	698647468	Glycosyltransferase
	TRINITY_DN35237_c0_g1	8.34806	1.81e-06	3.06e-05	UP	NA	NA	NA	NA	NA	NA	NA	NA	NA	NA	NA
	TRINITY_DN50501_c0_g1	8.34806	1.81e-06	3.06e-05	UP	NA	NA	NA	NA	NA	NA	NA	NA	NA	NA	NA
	TRINITY_DN9707_c1_g3	8.34806	1.81e-06	3.06e-05	UP	TRINITY_DN9707_c1_g3	TraesCS4A01G470700.1	735	843	843	1.78e-47	TraesCS4A01G470700	chr4A	731489658	731490604	carbohydrate esterase, putative (DUF303)
	TRINITY_DN24622_c0_g1	8.34723	5.52e-06	8.3e-05	UP	TRINITY_DN24622_c0_g1	TraesCS3A01G009200.1	2515	2982	3081	0	TraesCS3A01G009200	chr3A	8321632	8329985	NBS-LRR-like resistance protein
	TRINITY_DN61539_c0_g1	8.34723	5.52e-06	8.3e-05	UP	TRINITY_DN61539_c0_g1	TraesCS4A01G474700.1	432	795	795	3.51e-134	TraesCS4A01G474700	chr4A	733925335	733928629	Disease resistance protein
	TRINITY_DN123582_c0_g1	8.33842	3.18e-06	5.07e-05	UP	NA	NA	NA	NA	NA	NA	NA	NA	NA	NA	NA
	TRINITY_DN37904_c0_g1	8.33842	3.18e-06	5.07e-05	UP	TRINITY_DN37904_c0_g1	TraesCS2B01G106100.1	1	567	567	0	TraesCS2B01G106100	chr2B	66805366	66805932	Lectin receptor kinase
	TRINITY_DN43676_c1_g1	8.33482	1.51e-06	2.59e-05	UP	NA	NA	NA	NA	NA	NA	NA	NA	NA	NA	NA
	TRINITY_DN45785_c0_g2	8.33482	1.51e-06	2.59e-05	UP	TRINITY_DN45785_c0_g2	TraesCS2A01G073800.1	18	89	3159	2.54e-25	TraesCS2A01G073800	chr2A	32507699	32514501	5'-3' exoribonuclease 3
	TRINITY_DN87678_c1_g1	8.33283	4.63e-06	7.07e-05	UP	NA	NA	NA	NA	NA	NA	NA	NA	NA	NA	NA
	TRINITY_DN116663_c0_g2	8.33192	1.72e-06	2.93e-05	UP	NA	NA	NA	NA	NA	NA	NA	NA	NA	NA	NA
	TRINITY_DN28828_c0_g1	8.33192	1.72e-06	2.93e-05	UP	NA	NA	NA	NA	NA	NA	NA	NA	NA	NA	NA
	TRINITY_DN42719_c0_g1	8.33192	1.72e-06	2.93e-05	UP	NA	NA	NA	NA	NA	NA	NA	NA	NA	NA	NA
	TRINITY_DN49041_c0_g1	8.33192	1.72e-06	2.93e-05	UP	TRINITY_DN49041_c0_g1	TraesCS6B01G148400.1	393	618	2697	1.82e-99	TraesCS6B01G148400	chr6B	149456633	149468206	Disease resistance protein (NBS-LRR class) family
	TRINITY_DN35309_c3_g1	8.32966	1.96e-06	3.27e-05	UP	TRINITY_DN35309_c3_g1	TraesCS7D01G451500.1	375	577	3513	2.07e-103	TraesCS7D01G451500	chr7D	571258963	571264788	Disease resistance protein RPM1
	TRINITY_DN87514_c1_g1	8.3279	1.25e-06	2.2e-05	UP	NA	NA	NA	NA	NA	NA	NA	NA	NA	NA	NA
	TRINITY_DN390_c1_g1	8.32675	1.73e-06	2.93e-05	UP	TRINITY_DN390_c1_g1	TraesCS6B01G299300.1	88	393	1050	8.89e-159	TraesCS6B01G299300	chr6B	537301136	537302185	ADP-ribosylation factor-related protein 1
	TRINITY_DN22059_c0_g3	8.32582	4.63e-06	7.07e-05	UP	TRINITY_DN22059_c0_g3	TraesCS1A01G051800.1	837	613	837	1.55e-110	TraesCS1A01G051800	chr1A	33373636	33374973	Protein aluminum sensitive 3
	TRINITY_DN101543_c0_g1	8.32285	3.8e-06	5.93e-05	UP	TRINITY_DN101543_c0_g1	TraesCS7A01G015800.1	1243	1290	1290	8.54e-17	TraesCS7A01G015800	chr7A	6768806	6776212	receptor kinase 1
	TRINITY_DN72841_c0_g2	8.32285	3.8e-06	5.93e-05	UP	TRINITY_DN72841_c0_g2	TraesCS6D01G376700.1	591	642	642	2.47e-19	TraesCS6D01G376700	chr6D	459270786	459271427	Outer arm dynein light chain 1 protein
	TRINITY_DN51097_c0_g1	8.3221	1.41e-06	2.44e-05	UP	NA	NA	NA	NA	NA	NA	NA	NA	NA	NA	NA
	TRINITY_DN166077_c0_g1	8.31989	3.35e-06	5.31e-05	UP	NA	NA	NA	NA	NA	NA	NA	NA	NA	NA	NA
	TRINITY_DN143641_c0_g1	8.31801	1.47e-06	2.54e-05	UP	NA	NA	NA	NA	NA	NA	NA	NA	NA	NA	NA
	TRINITY_DN46866_c0_g3	8.31801	1.47e-06	2.54e-05	UP	NA	NA	NA	NA	NA	NA	NA	NA	NA	NA	NA
	TRINITY_DN43904_c5_g1	8.31721	4.85e-06	7.36e-05	UP	NA	NA	NA	NA	NA	NA	NA	NA	NA	NA	NA
	TRINITY_DN122702_c0_g1	8.31626	1.88e-06	3.17e-05	UP	NA	NA	NA	NA	NA	NA	NA	NA	NA	NA	NA
	TRINITY_DN66457_c0_g1	8.31398	2.43e-06	3.98e-05	UP	TRINITY_DN66457_c0_g1	TraesCS2B01G052700.1	460	785	1284	1.93e-101	TraesCS2B01G052700	chr2B	25842785	25844331	F-box family protein
	TRINITY_DN68587_c0_g4	8.31398	2.43e-06	3.98e-05	UP	TRINITY_DN68587_c0_g4	TraesCS7B01G411600.1	483	538	957	6e-21	TraesCS7B01G411600	chr7B	680072705	680074648	BTB/POZ domain protein, putative (DUF177)
	TRINITY_DN33386_c0_g3	8.31333	2.18e-06	3.61e-05	UP	TRINITY_DN33386_c0_g3	TraesCS7A01G315000.1	2	65	507	6.48e-19	TraesCS7A01G315000	chr7A	448725788	448726294	Gibberellin 2-beta-dioxygenase 8
	TRINITY_DN101232_c0_g1	8.31313	7.34e-06	0.000106864	UP	NA	NA	NA	NA	NA	NA	NA	NA	NA	NA	NA
	TRINITY_DN89248_c0_g1	8.31313	7.34e-06	0.000106864	UP	TRINITY_DN89248_c0_g1	TraesCS2D01G530000.1	757	824	921	2.54e-28	TraesCS2D01G530000	chr2D	616936173	616937721	Nuclease S1
	TRINITY_DN44244_c3_g1	8.31218	1.44e-06	2.49e-05	UP	TRINITY_DN44244_c3_g1	TraesCS2B01G037400.1	117	328	1512	4.86e-90	TraesCS2B01G037400	chr2B	17485487	17492034	Glutamyl-tRNA (Gln) amidotransferase subunit A
	TRINITY_DN140174_c1_g1	8.31103	2.13e-06	3.53e-05	UP	TRINITY_DN140174_c1_g1	TraesCS7D01G008400.1	393	100	909	1.76e-150	TraesCS7D01G008400	chr7D	4018527	4019435	NADH dehydrogenase (Ubiquinone) complex I, assembly factor 6
	TRINITY_DN6195_c1_g2	8.31103	2.13e-06	3.53e-05	UP	NA	NA	NA	NA	NA	NA	NA	NA	NA	NA	NA
	TRINITY_DN99787_c0_g1	8.31103	2.13e-06	3.53e-05	UP	TRINITY_DN99787_c0_g1	TraesCS4A01G061800.1	1242	1443	1443	4.48e-101	TraesCS4A01G061800	chr4A	58570106	58571548	Allene oxide synthase
	TRINITY_DN50026_c0_g2	8.30926	1.49e-06	2.57e-05	UP	TRINITY_DN50026_c0_g2	TraesCS4A01G492700.1	539	636	675	1.09e-37	TraesCS4A01G492700	chr4A	741588190	741588864	Glutaredoxin family protein, expressed
	TRINITY_DN15408_c2_g1	8.30808	1.9e-06	3.19e-05	UP	NA	NA	NA	NA	NA	NA	NA	NA	NA	NA	NA
	TRINITY_DN68758_c0_g1	8.30339	1.73e-06	2.93e-05	UP	NA	NA	NA	NA	NA	NA	NA	NA	NA	NA	NA
	TRINITY_DN43615_c0_g1	8.30219	1.75e-06	2.96e-05	UP	NA	NA	NA	NA	NA	NA	NA	NA	NA	NA	NA
	TRINITY_DN72205_c0_g4	8.30219	1.75e-06	2.96e-05	UP	NA	NA	NA	NA	NA	NA	NA	NA	NA	NA	NA
	TRINITY_DN31982_c1_g1	8.30112	3.55e-06	5.59e-05	UP	NA	NA	NA	NA	NA	NA	NA	NA	NA	NA	NA
	TRINITY_DN12978_c0_g1	8.3008	9.3e-15	5.82e-13	UP	TRINITY_DN12978_c0_g1	TraesCS2B01G005100.1	471	669	1212	2.52e-75	TraesCS2B01G005100	chr2B	3300441	3306813	AAR2 family protein
	TRINITY_DN42726_c0_g1	8.30043	2.07e-06	3.44e-05	UP	NA	NA	NA	NA	NA	NA	NA	NA	NA	NA	NA
	TRINITY_DN27916_c0_g1	8.29992	5.56e-11	1.94e-09	UP	TRINITY_DN27916_c0_g1	TraesCS7D01G536900.1	780	933	933	4.14e-72	TraesCS7D01G536900	chr7D	628603672	628606656	2-oxoglutarate (2OG) and Fe(II)-dependent oxygenase superfamily protein
	TRINITY_DN29039_c0_g1	8.29813	3.03e-06	4.84e-05	UP	NA	NA	NA	NA	NA	NA	NA	NA	NA	NA	NA
	TRINITY_DN29391_c0_g3	8.2963	1.67e-06	2.85e-05	UP	TRINITY_DN29391_c0_g3	TraesCS7B01G198700.1	1	202	819	6.88e-70	TraesCS7B01G198700	chr7B	355802816	355804074	Myb/SANT-like DNA-binding domain protein
	TRINITY_DN70785_c0_g3	8.2963	1.67e-06	2.85e-05	UP	NA	NA	NA	NA	NA	NA	NA	NA	NA	NA	NA
	TRINITY_DN44712_c1_g1	8.29514	2.62e-06	4.27e-05	UP	TRINITY_DN44712_c1_g1	TraesCS2B01G036600.1	192	900	900	0	TraesCS2B01G036600	chr2B	17389096	17390416	receptor lectin kinase
	TRINITY_DN15432_c0_g3	8.29425	7.6e-06	0.000110294	UP	NA	NA	NA	NA	NA	NA	NA	NA	NA	NA	NA
	TRINITY_DN12247_c0_g4	8.29216	2.32e-06	3.82e-05	UP	NA	NA	NA	NA	NA	NA	NA	NA	NA	NA	NA
	TRINITY_DN61968_c0_g3	8.29216	2.32e-06	3.82e-05	UP	TRINITY_DN61968_c0_g3	TraesCS7D01G462300.1	681	855	855	1.29e-87	TraesCS7D01G462300	chr7D	577983576	577984997	Polyadenylate-binding protein 1-B-binding protein
	TRINITY_DN17203_c0_g1	8.29196	7.51e-16	5.56e-14	UP	NA	NA	NA	NA	NA	NA	NA	NA	NA	NA	NA
	TRINITY_DN35574_c0_g2	8.29038	1.79e-06	3.01e-05	UP	NA	NA	NA	NA	NA	NA	NA	NA	NA	NA	NA
	TRINITY_DN41083_c0_g1	8.29038	1.79e-06	3.01e-05	UP	TRINITY_DN41083_c0_g1	TraesCS3B01G545800.1	76	246	696	1.01e-81	TraesCS3B01G545800	chr3B	782742084	782743642	DNA-binding protein EMBP-1
	TRINITY_DN125241_c0_g1	8.28847	4.06e-06	6.3e-05	UP	TRINITY_DN125241_c0_g1	TraesCS7D01G424200.1	1	156	1230	2.75e-77	TraesCS7D01G424200	chr7D	544849401	544850823	F-box family protein
	TRINITY_DN194883_c0_g1	8.28847	4.06e-06	6.3e-05	UP	NA	NA	NA	NA	NA	NA	NA	NA	NA	NA	NA
	TRINITY_DN67512_c1_g1	8.28847	4.06e-06	6.3e-05	UP	NA	NA	NA	NA	NA	NA	NA	NA	NA	NA	NA
	TRINITY_DN236655_c0_g1	8.2862	1.95e-06	3.26e-05	UP	TRINITY_DN236655_c0_g1	TraesCS4A01G418100.1	128	190	735	1.71e-23	TraesCS4A01G418100	chr4A	688092065	688095665	Succinate dehydrogenase subunit 5, mitochondrial
	TRINITY_DN31057_c0_g2	8.28513	4.48e-06	6.87e-05	UP	NA	NA	NA	NA	NA	NA	NA	NA	NA	NA	NA
	TRINITY_DN50258_c0_g1	8.28442	2.28e-06	3.76e-05	UP	TRINITY_DN50258_c0_g1	TraesCS4A01G014100.1	1036	1197	1197	6.85e-56	TraesCS4A01G014100	chr4A	8586296	8589156	Interferon-activable protein
	TRINITY_DN72080_c1_g1	8.28442	2.28e-06	3.76e-05	UP	TRINITY_DN72080_c1_g1	TraesCS2A01G404700.1	440	591	3855	2.27e-55	TraesCS2A01G404700	chr2A	660273152	660291226	Niemann-Pick C1 protein
	TRINITY_DN24406_c0_g2	8.2821	3.79e-06	5.91e-05	UP	TRINITY_DN24406_c0_g2	TraesCS7A01G297700.1	50	1	387	9.71e-15	TraesCS7A01G297700	chr7A	401606093	401607752	homeodomain GLABROUS 2
	TRINITY_DN256703_c0_g1	8.28143	2.59e-06	4.21e-05	UP	NA	NA	NA	NA	NA	NA	NA	NA	NA	NA	NA
	TRINITY_DN60204_c0_g1	8.28143	2.59e-06	4.21e-05	UP	NA	NA	NA	NA	NA	NA	NA	NA	NA	NA	NA
	TRINITY_DN37371_c1_g1	8.28023	1.95e-06	3.26e-05	UP	NA	NA	NA	NA	NA	NA	NA	NA	NA	NA	NA
	TRINITY_DN108072_c2_g2	8.27908	3.25e-06	5.17e-05	UP	NA	NA	NA	NA	NA	NA	NA	NA	NA	NA	NA
	TRINITY_DN42185_c0_g1	8.27724	1.96e-06	3.28e-05	UP	NA	NA	NA	NA	NA	NA	NA	NA	NA	NA	NA
	TRINITY_DN193379_c0_g1	8.27606	2.85e-06	4.6e-05	UP	NA	NA	NA	NA	NA	NA	NA	NA	NA	NA	NA
	TRINITY_DN22008_c0_g1	8.27606	2.85e-06	4.6e-05	UP	TRINITY_DN22008_c0_g1	TraesCS7D01G117000.1	304	536	1440	1.1e-116	TraesCS7D01G117000	chr7D	72170415	72174308	ABC transporter C family protein
	TRINITY_DN96940_c0_g1	8.27512	7.89e-06	0.000114241	UP	TRINITY_DN96940_c0_g1	TraesCS3A01G522300.1	1725	2208	2208	0	TraesCS3A01G522300	chr3A	738431512	738435697	Protein kinase family protein
	TRINITY_DN120828_c0_g1	8.27125	2.16e-06	3.58e-05	UP	NA	NA	NA	NA	NA	NA	NA	NA	NA	NA	NA
	TRINITY_DN49472_c1_g1	8.27125	2.16e-06	3.58e-05	UP	TRINITY_DN49472_c1_g1	TraesCS7A01G562900.1	1	249	3777	1.12e-128	TraesCS7A01G562900	chr7A	733362526	733368237	Disease resistance protein RPM1
	TRINITY_DN67880_c2_g1	8.27125	2.16e-06	3.58e-05	UP	NA	NA	NA	NA	NA	NA	NA	NA	NA	NA	NA
	TRINITY_DN15396_c5_g1	8.26928	5.3e-06	7.99e-05	UP	NA	NA	NA	NA	NA	NA	NA	NA	NA	NA	NA
	TRINITY_DN67667_c1_g2	8.26928	5.3e-06	7.99e-05	UP	NA	NA	NA	NA	NA	NA	NA	NA	NA	NA	NA
	TRINITY_DN63084_c0_g1	8.26399	2.28e-06	3.76e-05	UP	TRINITY_DN63084_c0_g1	TraesCS7D01G417900.1	417	687	1431	4.53e-141	TraesCS7D01G417900	chr7D	536976187	536982524	Calcium-binding mitochondrial carrier protein SCaMC-2
	TRINITY_DN122650_c0_g1	8.25978	3.52e-06	5.54e-05	UP	NA	NA	NA	NA	NA	NA	NA	NA	NA	NA	NA
	TRINITY_DN100938_c0_g1	8.25794	2.32e-06	3.81e-05	UP	NA	NA	NA	NA	NA	NA	NA	NA	NA	NA	NA
	TRINITY_DN105194_c0_g1	8.25794	2.32e-06	3.81e-05	UP	NA	NA	NA	NA	NA	NA	NA	NA	NA	NA	NA
	TRINITY_DN80458_c0_g4	8.25672	3.12e-06	4.98e-05	UP	TRINITY_DN80458_c0_g4	TraesCS7B01G427800.1	951	1329	4485	0	TraesCS7B01G427800	chr7B	697073102	697081669	Receptor-like protein kinase
	TRINITY_DN13892_c2_g2	8.2549	2.43e-06	3.99e-05	UP	TRINITY_DN13892_c2_g2	TraesCS2B01G003900.1	62	281	1020	1.44e-76	TraesCS2B01G003900	chr2B	2107170	2108718	Cleavage stimulation factor subunit 1
	TRINITY_DN186671_c0_g1	8.2549	2.43e-06	3.99e-05	UP	NA	NA	NA	NA	NA	NA	NA	NA	NA	NA	NA
	TRINITY_DN160338_c0_g1	8.25294	5.61e-06	8.41e-05	UP	TRINITY_DN160338_c0_g1	TraesCS7A01G312800.1	1177	1234	1344	3.91e-21	TraesCS7A01G312800	chr7A	443963036	443966892	Amino acid transporter, putative
	TRINITY_DN2831_c0_g2	8.25294	5.61e-06	8.41e-05	UP	NA	NA	NA	NA	NA	NA	NA	NA	NA	NA	NA
	TRINITY_DN43224_c0_g2	8.25294	5.61e-06	8.41e-05	UP	NA	NA	NA	NA	NA	NA	NA	NA	NA	NA	NA
	TRINITY_DN73450_c0_g1	8.25294	5.61e-06	8.41e-05	UP	TRINITY_DN73450_c0_g1	TraesCS2B01G187400.1	105	1	1299	2.9e-47	TraesCS2B01G187400	chr2B	162863706	162870529	Transducin/WD40 repeat protein
	TRINITY_DN39561_c0_g2	8.25185	2.63e-06	4.28e-05	UP	NA	NA	NA	NA	NA	NA	NA	NA	NA	NA	NA
	TRINITY_DN46540_c0_g1	8.25185	2.63e-06	4.28e-05	UP	TRINITY_DN46540_c0_g1	TraesCS2A01G522600.1	118	702	702	4.75e-180	TraesCS2A01G522600	chr2A	744806189	744806890	G kinase-anchoring protein 1
	TRINITY_DN10441_c4_g1	8.24573	3.55e-06	5.58e-05	UP	TRINITY_DN10441_c4_g1	TraesCSU01G041700.1	3201	3249	3249	9.8e-13	TraesCSU01G041700	chrUn	34142009	34149000	Disease resistance protein (TIR-NBS-LRR class) family
	TRINITY_DN179492_c0_g1	8.24573	3.55e-06	5.58e-05	UP	NA	NA	NA	NA	NA	NA	NA	NA	NA	NA	NA
	TRINITY_DN45583_c0_g1	8.24573	3.55e-06	5.58e-05	UP	NA	NA	NA	NA	NA	NA	NA	NA	NA	NA	NA
	TRINITY_DN111233_c0_g1	8.2445	2.64e-06	4.29e-05	UP	NA	NA	NA	NA	NA	NA	NA	NA	NA	NA	NA
	TRINITY_DN16307_c0_g1	8.2445	2.64e-06	4.29e-05	UP	TRINITY_DN16307_c0_g1	TraesCS3D01G068100.1	2537	2782	3066	1.52e-115	TraesCS3D01G068100	chr3D	30006701	30009766	NBS-LRR disease resistance protein
	TRINITY_DN87394_c0_g1	8.24264	4.13e-06	6.4e-05	UP	NA	NA	NA	NA	NA	NA	NA	NA	NA	NA	NA
	TRINITY_DN123685_c0_g1	8.24021	3.83e-06	5.97e-05	UP	TRINITY_DN123685_c0_g1	TraesCS1D01G018000.1	1116	1323	1644	1.67e-94	TraesCS1D01G018000	chr1D	7899633	7902587	Receptor-like kinase
	TRINITY_DN54204_c0_g2	8.24021	3.83e-06	5.97e-05	UP	NA	NA	NA	NA	NA	NA	NA	NA	NA	NA	NA
	TRINITY_DN36675_c1_g1	8.23953	4.91e-06	7.45e-05	UP	NA	NA	NA	NA	NA	NA	NA	NA	NA	NA	NA
	TRINITY_DN30984_c0_g1	8.23837	2.76e-06	4.46e-05	UP	TRINITY_DN30984_c0_g1	TraesCS5A01G147200.1	33	160	399	5.87e-36	TraesCS5A01G147200	chr5A	324700658	324701192	Anthocyanidin 3-O-glucosyltransferase 2
	TRINITY_DN58455_c0_g1	8.23837	2.76e-06	4.46e-05	UP	NA	NA	NA	NA	NA	NA	NA	NA	NA	NA	NA
	TRINITY_DN104681_c0_g1	8.2361	8.58e-06	0.000123128	UP	NA	NA	NA	NA	NA	NA	NA	NA	NA	NA	NA
	TRINITY_DN132176_c0_g1	8.23529	2.95e-06	4.73e-05	UP	NA	NA	NA	NA	NA	NA	NA	NA	NA	NA	NA
	TRINITY_DN108072_c3_g2	8.23295	7.1e-06	0.000103798	UP	TRINITY_DN108072_c3_g2	TraesCS7A01G567500.1	666	1203	5253	0	TraesCS7A01G567500	chr7A	736088791	736096134	NBS-LRR disease resistance protein
	TRINITY_DN149096_c0_g1	8.2291	3.64e-06	5.7e-05	UP	TRINITY_DN149096_c0_g1	TraesCS2A01G247900.1	702	1839	1839	0	TraesCS2A01G247900	chr2A	367658059	367660254	Ta11-like non-LTR retrotransposon
	TRINITY_DN69150_c0_g1	8.22784	3.09e-06	4.93e-05	UP	NA	NA	NA	NA	NA	NA	NA	NA	NA	NA	NA
	TRINITY_DN66966_c0_g1	8.22666	5.42e-06	8.15e-05	UP	NA	NA	NA	NA	NA	NA	NA	NA	NA	NA	NA
	TRINITY_DN34795_c0_g1	8.22598	4.48e-06	6.87e-05	UP	NA	NA	NA	NA	NA	NA	NA	NA	NA	NA	NA
	TRINITY_DN29021_c0_g2	8.22475	3.07e-06	4.91e-05	UP	TRINITY_DN29021_c0_g2	TraesCS2A01G273500.1	157	425	432	1.91e-16	TraesCS2A01G273500	chr2A	447947623	447948054	Transposon TX1 uncharacterized
	TRINITY_DN199869_c0_g1	8.22352	4.72e-06	7.19e-05	UP	NA	NA	NA	NA	NA	NA	NA	NA	NA	NA	NA
	TRINITY_DN36501_c0_g1	8.22352	4.72e-06	7.19e-05	UP	NA	NA	NA	NA	NA	NA	NA	NA	NA	NA	NA
	TRINITY_DN66224_c0_g1	8.22352	4.72e-06	7.19e-05	UP	NA	NA	NA	NA	NA	NA	NA	NA	NA	NA	NA
	TRINITY_DN26321_c5_g1	8.22284	5.28e-06	7.95e-05	UP	TRINITY_DN26321_c5_g1	TraesCS7B01G490500.1	1350	1821	3759	0	TraesCS7B01G490500	chr7B	743814951	743818790	Rp1-like protein
	TRINITY_DN77064_c0_g1	8.22284	5.28e-06	7.95e-05	UP	TRINITY_DN77064_c0_g1	TraesCS4A01G440700.1	713	875	1680	2.01e-79	TraesCS4A01G440700	chr4A	709716334	709720574	Protein nrt1 ptr family 1.2
	TRINITY_DN147503_c0_g1	8.22164	3.15e-06	5.02e-05	UP	NA	NA	NA	NA	NA	NA	NA	NA	NA	NA	NA
	TRINITY_DN51043_c0_g1	8.21853	3.32e-06	5.26e-05	UP	TRINITY_DN51043_c0_g1	TraesCS7B01G491000.1	364	644	1107	8.78e-74	TraesCS7B01G491000	chr7B	743997174	743999255	Disease resistance protein (TIR-NBS-LRR class) family
	TRINITY_DN55411_c0_g1	8.2165	8.06e-29	4.43e-26	UP	TRINITY_DN55411_c0_g1	TraesCS1B01G402600.1	1104	1573	1752	0	TraesCS1B01G402600	chr1B	632420586	632423487	Fatty acyl-CoA reductase
	TRINITY_DN113190_c0_g1	8.21619	9e-06	0.000128615	UP	NA	NA	NA	NA	NA	NA	NA	NA	NA	NA	NA
	TRINITY_DN42678_c0_g2	8.21541	3.59e-06	5.64e-05	UP	NA	NA	NA	NA	NA	NA	NA	NA	NA	NA	NA
	TRINITY_DN51770_c0_g1	8.21541	3.59e-06	5.64e-05	UP	NA	NA	NA	NA	NA	NA	NA	NA	NA	NA	NA
	TRINITY_DN51967_c0_g1	8.213	7.5e-06	0.000109047	UP	NA	NA	NA	NA	NA	NA	NA	NA	NA	NA	NA
	TRINITY_DN50309_c0_g1	8.21099	3.39e-06	5.36e-05	UP	NA	NA	NA	NA	NA	NA	NA	NA	NA	NA	NA
	TRINITY_DN65469_c0_g1	8.21099	3.39e-06	5.36e-05	UP	TRINITY_DN65469_c0_g1	TraesCS7B01G331700.1	132	189	441	6.75e-22	TraesCS7B01G331700	chr7B	586748610	586750570	Extracellular matrix-binding protein EbhA
	TRINITY_DN88394_c0_g1	8.21099	3.39e-06	5.36e-05	UP	NA	NA	NA	NA	NA	NA	NA	NA	NA	NA	NA
	TRINITY_DN52407_c0_g3	8.20912	4.56e-06	6.98e-05	UP	NA	NA	NA	NA	NA	NA	NA	NA	NA	NA	NA
	TRINITY_DN65710_c0_g1	8.20912	4.56e-06	6.98e-05	UP	NA	NA	NA	NA	NA	NA	NA	NA	NA	NA	NA
	TRINITY_DN34826_c0_g2	8.20786	3.57e-06	5.61e-05	UP	TRINITY_DN34826_c0_g2	TraesCS4A01G464500.1	231	660	2988	0	TraesCS4A01G464500	chr4A	728427690	728431426	NBS-LRR-like resistance protein
	TRINITY_DN94743_c0_g1	8.20786	3.57e-06	5.61e-05	UP	TRINITY_DN94743_c0_g1	TraesCS6B01G459200.1	2153	2401	3678	7e-129	TraesCS6B01G459200	chr6B	713781895	713788515	disease resistance family protein / LRR family protein
	TRINITY_DN41657_c0_g1	8.20663	5.82e-06	8.7e-05	UP	TRINITY_DN41657_c0_g1	TraesCS3B01G001000.1	1	117	585	5.08e-37	TraesCS3B01G001000	chr3B	1355162	1356508	Receptor-like protein kinase
	TRINITY_DN55416_c0_g1	8.20595	5.69e-06	8.51e-05	UP	NA	NA	NA	NA	NA	NA	NA	NA	NA	NA	NA
	TRINITY_DN90472_c0_g1	8.20542	5.82e-10	1.75e-08	UP	TRINITY_DN90472_c0_g1	TraesCS4A01G452700.1	218	382	1680	2.87e-80	TraesCS4A01G452700	chr4A	717738477	717742320	60 kDa chaperonin
	TRINITY_DN249180_c0_g1	8.20472	3.6e-06	5.65e-05	UP	NA	NA	NA	NA	NA	NA	NA	NA	NA	NA	NA
	TRINITY_DN49922_c2_g1	8.20472	3.6e-06	5.65e-05	UP	NA	NA	NA	NA	NA	NA	NA	NA	NA	NA	NA
	TRINITY_DN91126_c0_g1	8.20472	3.6e-06	5.65e-05	UP	TRINITY_DN91126_c0_g1	TraesCS7D01G544000.1	944	1493	2754	0	TraesCS7D01G544000	chr7D	632020979	632024254	NBS-LRR-like resistance protein
	TRINITY_DN49666_c0_g1	8.20157	3.73e-06	5.84e-05	UP	TRINITY_DN49666_c0_g1	TraesCS2D01G248200.6	2097	2136	2244	3.71e-10	TraesCS2D01G248200	chr2D	291952565	291956637	Receptor protein kinase-like protein
	TRINITY_DN106503_c0_g1	8.20028	4.55e-06	6.96e-05	UP	NA	NA	NA	NA	NA	NA	NA	NA	NA	NA	NA
	TRINITY_DN62124_c0_g2	8.20028	4.55e-06	6.96e-05	UP	NA	NA	NA	NA	NA	NA	NA	NA	NA	NA	NA
	TRINITY_DN61086_c0_g2	8.19525	4.33e-06	6.68e-05	UP	TRINITY_DN61086_c0_g2	TraesCS7D01G436300.1	3211	3857	6336	0	TraesCS7D01G436300	chr7D	555047327	555058398	NBS-LRR-like resistance protein
	TRINITY_DN88433_c0_g1	8.19525	4.33e-06	6.68e-05	UP	TRINITY_DN88433_c0_g1	TraesCS5A01G048100.1	904	984	2793	7.27e-29	TraesCS5A01G048100	chr5A	44266093	44284016	Valine--tRNA ligase
	TRINITY_DN201972_c0_g1	8.19394	3.91e-06	6.09e-05	UP	NA	NA	NA	NA	NA	NA	NA	NA	NA	NA	NA
	TRINITY_DN61004_c0_g1	8.19077	3.77e-06	5.89e-05	UP	NA	NA	NA	NA	NA	NA	NA	NA	NA	NA	NA
	TRINITY_DN28174_c0_g1	8.18565	7.03e-06	0.000102816	UP	NA	NA	NA	NA	NA	NA	NA	NA	NA	NA	NA
	TRINITY_DN33336_c0_g2	8.18565	7.03e-06	0.000102816	UP	TRINITY_DN33336_c0_g2	TraesCS4D01G004100.1	1016	1217	3201	7.41e-103	TraesCS4D01G004100	chr4D	1821950	1825589	NBS-LRR-like resistance protein
	TRINITY_DN75163_c0_g1	8.18311	5.36e-06	8.06e-05	UP	TRINITY_DN75163_c0_g1	TraesCS2A01G203100.1	774	831	927	9.94e-23	TraesCS2A01G203100	chr2A	178461999	178465998	Secretory carrier-associated membrane protein
	TRINITY_DN23410_c1_g1	8.18122	4.3e-06	6.64e-05	UP	TRINITY_DN23410_c1_g1	TraesCS4A01G309500.4	243	678	1209	0	TraesCS4A01G309500	chr4A	602870810	602873131	NBS-LRR disease resistance protein
	TRINITY_DN48034_c1_g1	8.18122	4.3e-06	6.64e-05	UP	NA	NA	NA	NA	NA	NA	NA	NA	NA	NA	NA
	TRINITY_DN36887_c0_g2	8.17802	4.65e-06	7.09e-05	UP	NA	NA	NA	NA	NA	NA	NA	NA	NA	NA	NA
	TRINITY_DN45275_c0_g1	8.17669	4.49e-06	6.89e-05	UP	NA	NA	NA	NA	NA	NA	NA	NA	NA	NA	NA
	TRINITY_DN72492_c1_g1	8.17669	4.49e-06	6.89e-05	UP	NA	NA	NA	NA	NA	NA	NA	NA	NA	NA	NA
	TRINITY_DN91195_c0_g1	8.17669	4.49e-06	6.89e-05	UP	NA	NA	NA	NA	NA	NA	NA	NA	NA	NA	NA
	TRINITY_DN42793_c1_g1	8.1748	5.16e-06	7.8e-05	UP	NA	NA	NA	NA	NA	NA	NA	NA	NA	NA	NA
	TRINITY_DN11959_c0_g2	8.17348	4.28e-06	6.6e-05	UP	NA	NA	NA	NA	NA	NA	NA	NA	NA	NA	NA
	TRINITY_DN76461_c0_g1	8.17225	7.94e-06	0.000114853	UP	TRINITY_DN76461_c0_g1	TraesCS5B01G564100.1	459	596	1089	6.83e-52	TraesCS5B01G564100	chr5B	709582692	709588646	OTU domain-containing protein
	TRINITY_DN64438_c0_g1	8.17157	5.88e-06	8.78e-05	UP	TRINITY_DN64438_c0_g1	TraesCS6B01G111300.1	661	725	759	1.28e-26	TraesCS6B01G111300	chr6B	93417812	93419357	Golgi SNAP receptor complex member 1
	TRINITY_DN75267_c0_g1	8.17157	5.88e-06	8.78e-05	UP	TRINITY_DN75267_c0_g1	TraesCSU01G129700.1	552	613	648	6.11e-25	TraesCSU01G129700	chrUn	110519994	110521093	Pterin-4-alpha-carbinolamine dehydratase, putative
	TRINITY_DN83594_c0_g1	8.16899	7.26e-06	0.000105852	UP	NA	NA	NA	NA	NA	NA	NA	NA	NA	NA	NA
	TRINITY_DN22558_c1_g1	8.16832	7.32e-06	0.000106652	UP	TRINITY_DN22558_c1_g1	TraesCS7D01G408600.1	790	474	1764	1.44e-166	TraesCS7D01G408600	chr7D	526377975	526380333	HAT transposon superfamily protein, putative
	TRINITY_DN22930_c0_g1	8.16832	7.32e-06	0.000106652	UP	TRINITY_DN22930_c0_g1	TraesCS2A01G030000.1	1189	1771	3285	0	TraesCS2A01G030000	chr2A	13811892	13815254	NBS-LRR-like resistance protein
	TRINITY_DN48757_c0_g2	8.16832	7.32e-06	0.000106652	UP	TRINITY_DN48757_c0_g2	TraesCS2A01G360000.1	357	473	480	1.57e-16	TraesCS2A01G360000	chr2A	603855754	603856938	Cysteine-rich receptor-like protein kinase 41
	TRINITY_DN21220_c0_g1	8.16704	4.53e-06	6.94e-05	UP	TRINITY_DN21220_c0_g1	TraesCS7A01G518400.1	468	624	1110	5.75e-46	TraesCS7A01G518400	chr7A	702218849	702228754	Formamidopyrimidine-DNA glycosylase
	TRINITY_DN29008_c0_g1	8.16704	4.53e-06	6.94e-05	UP	NA	NA	NA	NA	NA	NA	NA	NA	NA	NA	NA
	TRINITY_DN156603_c1_g1	8.16573	6.35e-06	9.39e-05	UP	NA	NA	NA	NA	NA	NA	NA	NA	NA	NA	NA
	TRINITY_DN237126_c0_g1	8.16573	6.35e-06	9.39e-05	UP	NA	NA	NA	NA	NA	NA	NA	NA	NA	NA	NA
	TRINITY_DN239585_c0_g1	8.16573	6.35e-06	9.39e-05	UP	NA	NA	NA	NA	NA	NA	NA	NA	NA	NA	NA
	TRINITY_DN14234_c0_g1	8.16248	5.67e-06	8.5e-05	UP	TRINITY_DN14234_c0_g1	TraesCS4A01G372600.1	194	316	867	3.4e-39	TraesCS4A01G372600	chr4A	647276847	647279733	Hypersensitive-induced response protein
	TRINITY_DN39500_c0_g2	8.16248	5.67e-06	8.5e-05	UP	NA	NA	NA	NA	NA	NA	NA	NA	NA	NA	NA
	TRINITY_DN54216_c0_g1	8.16248	5.67e-06	8.5e-05	UP	TRINITY_DN54216_c0_g1	TraesCSU01G012600.1	1010	1379	4398	0	TraesCSU01G012600	chrUn	15911554	15920276	NBS-LRR disease resistance protein-like protein
	TRINITY_DN14053_c2_g1	8.15545	3.12e-18	3.25e-16	UP	NA	NA	NA	NA	NA	NA	NA	NA	NA	NA	NA
	TRINITY_DN168261_c0_g1	8.15475	9.65e-06	0.000136464	UP	NA	NA	NA	NA	NA	NA	NA	NA	NA	NA	NA
	TRINITY_DN116272_c0_g1	8.15272	4.72e-06	7.19e-05	UP	TRINITY_DN116272_c0_g1	TraesCS6A01G301700.2	721	967	2214	3.31e-104	TraesCS6A01G301700	chr6A	535144378	535147684	Transposon protein, putative, CACTA, En/Spm sub-class
	TRINITY_DN82657_c0_g1	8.15272	4.72e-06	7.19e-05	UP	TRINITY_DN82657_c0_g1	TraesCS7B01G459500.1	658	987	1818	5.54e-130	TraesCS7B01G459500	chr7B	717281243	717305137	Protein kinase family protein
	TRINITY_DN105521_c0_g1	8.15144	8.19e-06	0.000118215	UP	TRINITY_DN105521_c0_g1	TraesCS2B01G030600.1	1668	1743	1743	1.56e-27	TraesCS2B01G030600	chr2B	13913351	13916145	CDT1-like protein a, chloroplastic
	TRINITY_DN39172_c1_g1	8.15144	8.19e-06	0.000118215	UP	TRINITY_DN39172_c1_g1	TraesCS6A01G164100.1	1242	1003	1317	3.17e-117	TraesCS6A01G164100	chr6A	162033880	162035366	Glucan endo-1,3-beta-glucosidase
	TRINITY_DN69760_c0_g1	8.15078	7.16e-06	0.000104619	UP	TRINITY_DN69760_c0_g1	TraesCS7A01G007400.1	340	885	1104	6.95e-84	TraesCS7A01G007400	chr7A	3379609	3383438	Disease resistance protein
	TRINITY_DN63982_c0_g1	8.14484	6.69e-06	9.85e-05	UP	TRINITY_DN63982_c0_g1	TraesCS7D01G344800.1	245	682	900	0	TraesCS7D01G344800	chr7D	442280513	442283984	Hepatoma-derived growth factor-related protein 2
	TRINITY_DN74386_c0_g1	8.14484	6.69e-06	9.85e-05	UP	NA	NA	NA	NA	NA	NA	NA	NA	NA	NA	NA
	TRINITY_DN43023_c0_g2	8.14292	5.44e-06	8.18e-05	UP	TRINITY_DN43023_c0_g2	TraesCS7D01G386300.1	550	1079	1677	0	TraesCS7D01G386300	chr7D	500772586	500775106	Glycosyltransferase
	TRINITY_DN30445_c0_g1	8.13964	5.9e-06	8.81e-05	UP	NA	NA	NA	NA	NA	NA	NA	NA	NA	NA	NA
	TRINITY_DN77579_c0_g1	8.13964	5.9e-06	8.81e-05	UP	TRINITY_DN77579_c0_g1	TraesCS7D01G412800.1	880	1146	2838	1.65e-120	TraesCS7D01G412800	chr7D	531082809	531089409	Zinc-transporting ATPase
	TRINITY_DN19614_c0_g2	8.13825	5.62e-06	8.42e-05	UP	NA	NA	NA	NA	NA	NA	NA	NA	NA	NA	NA
	TRINITY_DN84775_c6_g1	8.13825	5.62e-06	8.42e-05	UP	TRINITY_DN84775_c6_g1	TraesCS7B01G477800.1	436	648	1569	1.56e-86	TraesCS7B01G477800	chr7B	733355074	733357049	Transposon protein, putative, CACTA, En/Spm sub-class, expressed
	TRINITY_DN114900_c0_g2	8.13634	6.58e-06	9.7e-05	UP	TRINITY_DN114900_c0_g2	TraesCS2B01G627800.1	1858	2291	2370	9.97e-118	TraesCS2B01G627800	chr2B	799565110	799567798	transmembrane protein, putative (DUF594)
	TRINITY_DN162014_c0_g1	8.13634	6.58e-06	9.7e-05	UP	NA	NA	NA	NA	NA	NA	NA	NA	NA	NA	NA
	TRINITY_DN12923_c0_g1	8.13496	5.36e-06	8.06e-05	UP	TRINITY_DN12923_c0_g1	TraesCS6B01G184800.1	2577	2620	2919	1.28e-14	TraesCS6B01G184800	chr6B	207923884	207929181	Copper-transporting ATPase
	TRINITY_DN33690_c0_g1	8.13496	5.36e-06	8.06e-05	UP	NA	NA	NA	NA	NA	NA	NA	NA	NA	NA	NA
	TRINITY_DN93019_c0_g1	8.13496	5.36e-06	8.06e-05	UP	TRINITY_DN93019_c0_g1	TraesCS2B01G121700.1	443	752	5004	5.1e-161	TraesCS2B01G121700	chr2B	89303351	89315660	E3 ubiquitin-protein ligase SHPRH
	TRINITY_DN10787_c0_g2	8.13166	5.26e-06	7.93e-05	UP	TRINITY_DN10787_c0_g2	TraesCS7B01G357900.1	96	1	1203	3.79e-42	TraesCS7B01G357900	chr7B	619588295	619592565	MYB-related transcription factor
	TRINITY_DN34301_c0_g3	8.13166	5.26e-06	7.93e-05	UP	NA	NA	NA	NA	NA	NA	NA	NA	NA	NA	NA
	TRINITY_DN93075_c0_g1	8.12699	7.94e-06	0.000114858	UP	NA	NA	NA	NA	NA	NA	NA	NA	NA	NA	NA
	TRINITY_DN64562_c0_g1	8.12505	5.94e-06	8.85e-05	UP	TRINITY_DN64562_c0_g1	TraesCS2D01G042200.1	705	1001	3180	1.81e-135	TraesCS2D01G042200	chr2D	15113231	15116657	Disease resistance protein
	TRINITY_DN115407_c0_g4	8.12365	7.1e-06	0.000103741	UP	TRINITY_DN115407_c0_g4	TraesCS2D01G475300.1	2643	2871	2871	1.22e-117	TraesCS2D01G475300	chr2D	577790137	577798635	Receptor-kinase, putative
	TRINITY_DN59617_c0_g1	8.11839	7.01e-06	0.000102702	UP	TRINITY_DN59617_c0_g1	TraesCS7A01G568100.1	3986	4053	4299	8.91e-28	TraesCS7A01G568100	chr7A	736321904	736329752	NBS-LRR-like resistance protein
	TRINITY_DN132480_c0_g1	8.11698	6.12e-06	9.1e-05	UP	NA	NA	NA	NA	NA	NA	NA	NA	NA	NA	NA
	TRINITY_DN42789_c3_g1	8.11503	7.94e-06	0.000114853	UP	TRINITY_DN42789_c3_g1	TraesCS4B01G296400.1	210	1	939	3.25e-102	TraesCS4B01G296400	chr4B	582022603	582023683	Methyl esterase
	TRINITY_DN50023_c0_g1	8.11231	1.02e-05	0.000144236	UP	TRINITY_DN50023_c0_g1	TraesCS1D01G019000.1	348	747	747	7.13e-148	TraesCS1D01G019000	chr1D	8259965	8261039	Caffeoyl-CoA O-methyltransferase
	TRINITY_DN17969_c2_g1	8.1103	5.91e-06	8.82e-05	UP	NA	NA	NA	NA	NA	NA	NA	NA	NA	NA	NA
	TRINITY_DN55818_c0_g1	8.1103	5.91e-06	8.82e-05	UP	TRINITY_DN55818_c0_g1	TraesCS4B01G006400.1	1	129	1134	3.3e-52	TraesCS4B01G006400	chr4B	4135872	4137005	NBS-LRR disease resistance protein-like protein
	TRINITY_DN33649_c0_g1	8.10839	1.06e-17	1.03e-15	UP	TRINITY_DN33649_c0_g1	TraesCS3A01G528900.1	576	737	1428	2.27e-70	TraesCS3A01G528900	chr3A	742765978	742770170	Vacuolar-processing enzyme
	TRINITY_DN115872_c0_g1	8.10553	8.38e-06	0.000120479	UP	TRINITY_DN115872_c0_g1	TraesCS7D01G037700.1	2168	2410	3477	1.6e-75	TraesCS7D01G037700	chr7D	19049690	19053258	Receptor protein kinase, putative
	TRINITY_DN36925_c0_g1	8.10553	8.38e-06	0.000120479	UP	NA	NA	NA	NA	NA	NA	NA	NA	NA	NA	NA
	TRINITY_DN65865_c0_g1	8.10553	8.38e-06	0.000120479	UP	TRINITY_DN65865_c0_g1	TraesCS7D01G350500.1	1	139	1566	1.09e-67	TraesCS7D01G350500	chr7D	451185674	451188595	3-ketoacyl-CoA synthase
	TRINITY_DN69933_c0_g1	8.10553	8.38e-06	0.000120479	UP	TRINITY_DN69933_c0_g1	TraesCS2D01G511600.2	2275	2544	4269	4.96e-86	TraesCS2D01G511600	chr2D	603137584	603142107	NBS-LRR disease resistance protein, putative
	TRINITY_DN6119_c0_g1	8.10495	7.74e-19	8.72e-17	UP	NA	NA	NA	NA	NA	NA	NA	NA	NA	NA	NA
	TRINITY_DN52427_c0_g2	8.10215	7.58e-06	0.000110061	UP	TRINITY_DN52427_c0_g2	TraesCS4A01G026300.1	1039	1454	4410	4.08e-107	TraesCS4A01G026300	chr4A	18116285	18123914	receptor kinase 1
	TRINITY_DN180904_c0_g1	8.10021	7.52e-06	0.0001092	UP	NA	NA	NA	NA	NA	NA	NA	NA	NA	NA	NA
	TRINITY_DN22196_c0_g2	8.10021	7.52e-06	0.0001092	UP	NA	NA	NA	NA	NA	NA	NA	NA	NA	NA	NA
	TRINITY_DN78563_c0_g6	8.09877	7.04e-06	0.000103057	UP	NA	NA	NA	NA	NA	NA	NA	NA	NA	NA	NA
	TRINITY_DN24829_c1_g2	8.09682	8.41e-06	0.000120948	UP	TRINITY_DN24829_c1_g2	TraesCS6A01G409400.1	1	102	873	3.57e-42	TraesCS6A01G409400	chr6A	613347995	613351770	Titan9, putative
	TRINITY_DN56610_c1_g1	8.09682	8.41e-06	0.000120948	UP	NA	NA	NA	NA	NA	NA	NA	NA	NA	NA	NA
	TRINITY_DN10188_c0_g4	8.09539	6.73e-06	9.9e-05	UP	TRINITY_DN10188_c0_g4	TraesCS7D01G465900.1	2832	3118	3303	6.15e-150	TraesCS7D01G465900	chr7D	579789652	579799026	Pleiotropic drug resistance ABC transporter
	TRINITY_DN46425_c0_g2	8.09539	6.73e-06	9.9e-05	UP	TRINITY_DN46425_c0_g2	TraesCS6B01G369900.1	336	252	336	3.18e-37	TraesCS6B01G369900	chr6B	643632490	643633005	Fanconi anemia group M protein
	TRINITY_DN72680_c1_g3	8.092	6.62e-06	9.75e-05	UP	NA	NA	NA	NA	NA	NA	NA	NA	NA	NA	NA
	TRINITY_DN107120_c1_g1	8.08861	6.71e-06	9.87e-05	UP	TRINITY_DN107120_c1_g1	TraesCS3D01G034900.1	2244	2445	3099	7.63e-83	TraesCS3D01G034900	chr3D	12749686	12752784	Leucine-rich repeat receptor-like protein kinase family protein
	TRINITY_DN65169_c0_g1	8.08861	6.71e-06	9.87e-05	UP	TRINITY_DN65169_c0_g1	TraesCS3B01G604600.3	864	978	1092	1.23e-34	TraesCS3B01G604600	chr3B	823294611	823305404	Disease resistance protein (NBS-LRR class) family
	TRINITY_DN127116_c1_g1	8.08718	9.28e-06	0.000131904	UP	NA	NA	NA	NA	NA	NA	NA	NA	NA	NA	NA
	TRINITY_DN144571_c0_g1	8.08718	9.28e-06	0.000131904	UP	NA	NA	NA	NA	NA	NA	NA	NA	NA	NA	NA
	TRINITY_DN162335_c0_g1	8.08718	9.28e-06	0.000131904	UP	TRINITY_DN162335_c0_g1	TraesCS3A01G394700.1	150	205	471	1.16e-21	TraesCS3A01G394700	chr3A	642158665	642160126	OTU domain-containing protein
	TRINITY_DN179706_c0_g1	8.08718	9.28e-06	0.000131904	UP	NA	NA	NA	NA	NA	NA	NA	NA	NA	NA	NA
	TRINITY_DN36529_c0_g4	8.08718	9.28e-06	0.000131904	UP	NA	NA	NA	NA	NA	NA	NA	NA	NA	NA	NA
	TRINITY_DN81579_c0_g6	8.08718	9.28e-06	0.000131904	UP	NA	NA	NA	NA	NA	NA	NA	NA	NA	NA	NA
	TRINITY_DN186411_c0_g1	8.08521	7.53e-06	0.000109415	UP	NA	NA	NA	NA	NA	NA	NA	NA	NA	NA	NA
	TRINITY_DN20433_c0_g1	8.08497	8.87e-20	1.14e-17	UP	TRINITY_DN20433_c0_g1	TraesCS3B01G298500.1	35	1071	1071	0	TraesCS3B01G298500	chr3B	478578208	478579557	rRNA N-glycosidase
	TRINITY_DN55626_c0_g3	8.08179	8.1e-06	0.000117121	UP	NA	NA	NA	NA	NA	NA	NA	NA	NA	NA	NA
	TRINITY_DN92099_c0_g1	8.08179	8.1e-06	0.000117121	UP	TRINITY_DN92099_c0_g1	TraesCS7D01G148500.1	1	182	1869	1.23e-23	TraesCS7D01G148500	chr7D	95222919	95225996	Laminin subunit beta-1
	TRINITY_DN174786_c0_g1	8.07837	8.96e-06	0.000128122	UP	NA	NA	NA	NA	NA	NA	NA	NA	NA	NA	NA
	TRINITY_DN111998_c0_g1	8.07347	7.46e-06	0.0001085	UP	NA	NA	NA	NA	NA	NA	NA	NA	NA	NA	NA
	TRINITY_DN83007_c0_g1	8.07004	7.46e-06	0.000108488	UP	TRINITY_DN83007_c0_g1	TraesCS2D01G140900.1	799	844	1734	2.13e-14	TraesCS2D01G140900	chr2D	83100699	83103438	Terpene synthase
	TRINITY_DN49873_c0_g1	8.0686	1.11e-05	0.000155048	UP	TRINITY_DN49873_c0_g1	TraesCS2B01G045400.1	1660	2012	3357	7.41e-175	TraesCS2B01G045400	chr2B	22317491	22320847	Disease resistance protein (NBS-LRR class) family
	TRINITY_DN14508_c0_g2	8.06659	7.69e-06	0.000111508	UP	TRINITY_DN14508_c0_g2	TraesCS2A01G421400.1	349	430	1536	6.38e-31	TraesCS2A01G421400	chr2A	676985967	676991018	Aminotransferase
	TRINITY_DN21827_c1_g1	8.06512	9.79e-06	0.000138295	UP	TRINITY_DN21827_c1_g1	TraesCS4A01G464500.1	571	874	2988	1.08e-157	TraesCS4A01G464500	chr4A	728427690	728431426	NBS-LRR-like resistance protein
	TRINITY_DN25838_c1_g1	8.06512	9.79e-06	0.000138295	UP	NA	NA	NA	NA	NA	NA	NA	NA	NA	NA	NA
	TRINITY_DN52226_c0_g1	8.06512	9.79e-06	0.000138295	UP	TRINITY_DN52226_c0_g1	TraesCS5D01G127700.1	35	67	432	9.26e-09	TraesCS5D01G127700	chr5D	198459872	198460774	ATP-dependent DNA helicase 2 subunit KU80
	TRINITY_DN69617_c0_g1	8.06314	8.78e-06	0.000125701	UP	TRINITY_DN69617_c0_g1	TraesCS7B01G268900.1	290	351	987	4.93e-25	TraesCS7B01G268900	chr7B	492494073	492496114	Pollen-specific protein SF21
	TRINITY_DN70971_c0_g1	8.06314	8.78e-06	0.000125701	UP	TRINITY_DN70971_c0_g1	TraesCS6A01G149900.1	1530	1574	1632	1.39e-15	TraesCS6A01G149900	chr6A	133414380	133419105	Kinase
	TRINITY_DN71025_c0_g2	8.06314	8.78e-06	0.000125701	UP	TRINITY_DN71025_c0_g2	TraesCS2A01G429100.2	489	565	837	2.28e-28	TraesCS2A01G429100	chr2A	682488148	682490689	50S ribosomal protein L22-like
	TRINITY_DN71422_c1_g1	8.06164	9.52e-06	0.000135043	UP	TRINITY_DN71422_c1_g1	TraesCS7A01G358400.1	1158	1209	1608	2.88e-08	TraesCS7A01G358400	chr7A	529325860	529332077	T-complex protein 1 subunit epsilon
	TRINITY_DN12673_c0_g1	8.05967	9.6e-06	0.000135924	UP	NA	NA	NA	NA	NA	NA	NA	NA	NA	NA	NA
	TRINITY_DN21115_c1_g1	8.05967	9.6e-06	0.000135924	UP	TRINITY_DN21115_c1_g1	TraesCS2D01G576300.1	478	948	948	0	TraesCS2D01G576300	chr2D	639745369	639746905	NAC domain-containing protein, putative
	TRINITY_DN196996_c0_g1	8.04624	1.16e-05	0.000161831	UP	NA	NA	NA	NA	NA	NA	NA	NA	NA	NA	NA
	TRINITY_DN47136_c0_g2	8.04624	1.16e-05	0.000161831	UP	TRINITY_DN47136_c0_g2	TraesCS5B01G533500.1	1407	1476	1476	9.13e-28	TraesCS5B01G533500	chr5B	690238443	690240670	Amino acid transporter, putative
	TRINITY_DN51709_c0_g1	8.04624	1.16e-05	0.000161831	UP	TRINITY_DN51709_c0_g1	TraesCS7D01G380400.1	1036	1107	1314	1.49e-30	TraesCS7D01G380400	chr7D	493203179	493204894	Alpha-amylase
	TRINITY_DN73099_c0_g1	8.04624	1.16e-05	0.000161831	UP	TRINITY_DN73099_c0_g1	TraesCS5A01G000900.1	150	194	426	1.55e-15	TraesCS5A01G000900	chr5A	692733	694011	Protein yippee-like
	TRINITY_DN80246_c0_g1	8.04624	1.16e-05	0.000161831	UP	NA	NA	NA	NA	NA	NA	NA	NA	NA	NA	NA
	TRINITY_DN98374_c0_g1	8.04424	8.9e-06	0.000127333	UP	NA	NA	NA	NA	NA	NA	NA	NA	NA	NA	NA
	TRINITY_DN13864_c1_g1	8.04272	1.12e-05	0.000156209	UP	TRINITY_DN13864_c1_g1	TraesCS2D01G525300.1	707	437	2331	9.8e-138	TraesCS2D01G525300	chr2D	613341986	613348436	Beta xylosidase
	TRINITY_DN253695_c0_g1	8.03215	9.42e-06	0.00013371	UP	NA	NA	NA	NA	NA	NA	NA	NA	NA	NA	NA
	TRINITY_DN50623_c1_g1	8.02862	9.44e-06	0.000133987	UP	TRINITY_DN50623_c1_g1	TraesCS7A01G568100.1	2059	2265	4299	1.28e-100	TraesCS7A01G568100	chr7A	736321904	736329752	NBS-LRR-like resistance protein
	TRINITY_DN95781_c2_g1	8.02862	9.44e-06	0.000133987	UP	TRINITY_DN95781_c2_g1	TraesCS4B01G367100.1	80	438	1101	2.26e-130	TraesCS4B01G367100	chr4B	654201942	654203136	F-box protein
	TRINITY_DN135795_c0_g1	8.02354	1.23e-05	0.000169971	UP	NA	NA	NA	NA	NA	NA	NA	NA	NA	NA	NA
	TRINITY_DN32595_c0_g2	8.02354	1.23e-05	0.000169971	UP	NA	NA	NA	NA	NA	NA	NA	NA	NA	NA	NA
	TRINITY_DN201730_c0_g1	8.02284	6.48e-23	1.34e-20	UP	NA	NA	NA	NA	NA	NA	NA	NA	NA	NA	NA
	TRINITY_DN107832_c0_g1	8.02153	1.04e-05	0.000146389	UP	NA	NA	NA	NA	NA	NA	NA	NA	NA	NA	NA
	TRINITY_DN112954_c1_g1	8.02153	1.04e-05	0.000146389	UP	TRINITY_DN112954_c1_g1	TraesCS7D01G505400.1	598	841	5289	4.12e-126	TraesCS7D01G505400	chr7D	610841139	610855432	Transcription initiation factor TFIID subunit 1
	TRINITY_DN62676_c0_g1	8.02153	1.04e-05	0.000146389	UP	NA	NA	NA	NA	NA	NA	NA	NA	NA	NA	NA
	TRINITY_DN68544_c0_g1	8.02153	1.04e-05	0.000146389	UP	NA	NA	NA	NA	NA	NA	NA	NA	NA	NA	NA
	TRINITY_DN17134_c0_g2	8.01997	1.2e-05	0.000165845	UP	TRINITY_DN17134_c0_g2	TraesCS2D01G042100.1	1228	2663	3684	0	TraesCS2D01G042100	chr2D	15027654	15031836	NBS-LRR disease resistance protein-like
	TRINITY_DN59586_c0_g1	8.0164	1.12e-05	0.000155941	UP	NA	NA	NA	NA	NA	NA	NA	NA	NA	NA	NA
	TRINITY_DN81643_c0_g1	8.01283	1.07e-05	0.000150062	UP	TRINITY_DN81643_c0_g1	TraesCS5B01G506800.1	267	1206	1542	0	TraesCS5B01G506800	chr5B	671899910	671903078	F-box family protein
	TRINITY_DN8270_c8_g1	8.00925	1.06e-05	0.000148439	UP	NA	NA	NA	NA	NA	NA	NA	NA	NA	NA	NA
	TRINITY_DN11167_c0_g1	8.00207	1.13e-05	0.000157987	UP	TRINITY_DN11167_c0_g1	TraesCS4A01G330800.1	1166	1266	1266	9.89e-25	TraesCS4A01G330800	chr4A	615437069	615439255	Shikimate dehydrogenase (NADP(+))
	TRINITY_DN129925_c0_g1	8.00207	1.13e-05	0.000157987	UP	TRINITY_DN129925_c0_g1	TraesCS6B01G303300.1	1412	1471	2049	6.49e-24	TraesCS6B01G303300	chr6B	543214613	543223369	TBC domain containing protein
	TRINITY_DN44000_c0_g1	8.00207	1.13e-05	0.000157987	UP	TRINITY_DN44000_c0_g1	TraesCS6A01G093300.1	6123	6326	12129	5.8e-104	TraesCS6A01G093300	chr6A	61024114	61039743	Endoglucanase 11
	TRINITY_DN225272_c0_g1	7.98962	1.19e-05	0.000165317	UP	TRINITY_DN225272_c0_g1	TraesCS2A01G407400.1	2039	2300	2517	1.06e-72	TraesCS2A01G407400	chr2A	662966252	662969102	Lysine-specific histone demethylase 1-like protein
	TRINITY_DN61384_c0_g1	7.98962	1.19e-05	0.000165317	UP	TRINITY_DN61384_c0_g1	TraesCS5A01G241300.2	668	785	2196	3.93e-52	TraesCS5A01G241300	chr5A	457088347	457095371	Protein kinase
	TRINITY_DN74176_c0_g1	7.98962	1.19e-05	0.000165317	UP	NA	NA	NA	NA	NA	NA	NA	NA	NA	NA	NA
	TRINITY_DN120746_c0_g1	7.98598	1.2e-05	0.000165839	UP	NA	NA	NA	NA	NA	NA	NA	NA	NA	NA	NA
	TRINITY_DN167762_c0_g1	7.98598	1.2e-05	0.000165839	UP	NA	NA	NA	NA	NA	NA	NA	NA	NA	NA	NA
	TRINITY_DN195842_c0_g1	7.98598	1.2e-05	0.000165839	UP	NA	NA	NA	NA	NA	NA	NA	NA	NA	NA	NA
	TRINITY_DN257130_c0_g1	7.98598	1.2e-05	0.000165839	UP	TRINITY_DN257130_c0_g1	TraesCS2B01G609200.1	3105	3213	3213	1.3e-50	TraesCS2B01G609200	chr2B	789436010	789442430	Regulator of chromosome condensation (RCC1) family with FYVE zinc finger domain-containing protein
	TRINITY_DN45427_c0_g2	7.98598	1.2e-05	0.000165839	UP	NA	NA	NA	NA	NA	NA	NA	NA	NA	NA	NA
	TRINITY_DN54333_c0_g1	7.98598	1.2e-05	0.000165839	UP	TRINITY_DN54333_c0_g1	TraesCS3A01G378300.1	364	424	1350	2.16e-24	TraesCS3A01G378300	chr3A	627863341	627865189	Tubby-like F-box protein
	TRINITY_DN3251_c2_g1	7.98234	1.24e-05	0.000171369	UP	NA	NA	NA	NA	NA	NA	NA	NA	NA	NA	NA
	TRINITY_DN56701_c0_g1	7.98234	1.24e-05	0.000171369	UP	NA	NA	NA	NA	NA	NA	NA	NA	NA	NA	NA
	TRINITY_DN119795_c0_g1	7.96971	1.35e-05	0.000185323	UP	TRINITY_DN119795_c0_g1	TraesCS7B01G006600.1	420	477	591	1.03e-22	TraesCS7B01G006600	chr7B	3700539	3701681	Photosynthetic NDH subcomplex B 3
	TRINITY_DN104173_c0_g1	7.96603	1.34e-05	0.000183714	UP	TRINITY_DN104173_c0_g1	TraesCS3B01G016500.1	36	147	1497	2.15e-29	TraesCS3B01G016500	chr3B	6677121	6680947	Fatty acyl-CoA reductase
	TRINITY_DN121878_c0_g1	7.96234	1.37e-05	0.000187615	UP	NA	NA	NA	NA	NA	NA	NA	NA	NA	NA	NA
	TRINITY_DN180368_c0_g1	7.96234	1.37e-05	0.000187615	UP	NA	NA	NA	NA	NA	NA	NA	NA	NA	NA	NA
	TRINITY_DN38865_c0_g2	7.95325	1.52e-05	0.00020512	UP	TRINITY_DN38865_c0_g2	TraesCS7A01G410400.1	96	188	546	1.03e-41	TraesCS7A01G410400	chr7A	597523003	597527275	UDP-N-acetylglucosamine 1-carboxyvinyltransferase
	TRINITY_DN248022_c0_g1	7.94952	1.55e-05	0.000208833	UP	NA	NA	NA	NA	NA	NA	NA	NA	NA	NA	NA
	TRINITY_DN49898_c0_g1	7.94952	1.55e-05	0.000208833	UP	NA	NA	NA	NA	NA	NA	NA	NA	NA	NA	NA
	TRINITY_DN260244_c0_g1	7.94579	1.51e-05	0.000204475	UP	NA	NA	NA	NA	NA	NA	NA	NA	NA	NA	NA
	TRINITY_DN257073_c0_g1	7.94205	1.52e-05	0.000205903	UP	NA	NA	NA	NA	NA	NA	NA	NA	NA	NA	NA
	TRINITY_DN51215_c0_g1	7.94205	1.52e-05	0.000205903	UP	TRINITY_DN51215_c0_g1	TraesCS2B01G449700.1	1	298	1398	2.92e-154	TraesCS2B01G449700	chr2B	643090694	643093139	HXXXD-type acyl-transferase family protein, putative
	TRINITY_DN56207_c0_g5	7.94205	1.52e-05	0.000205903	UP	NA	NA	NA	NA	NA	NA	NA	NA	NA	NA	NA
	TRINITY_DN63698_c0_g1	7.94205	1.52e-05	0.000205903	UP	TRINITY_DN63698_c0_g1	TraesCS7B01G399000.1	630	82	1086	0	TraesCS7B01G399000	chr7B	665416812	665418451	F-box protein
	TRINITY_DN64245_c0_g1	7.94205	1.52e-05	0.000205903	UP	TRINITY_DN64245_c0_g1	TraesCS7D01G542200.1	60	608	4110	2.07e-122	TraesCS7D01G542200	chr7D	631424356	631428465	NBS-LRR disease resistance protein-like protein
	TRINITY_DN200566_c0_g1	7.92526	1.72e-05	0.000229761	UP	NA	NA	NA	NA	NA	NA	NA	NA	NA	NA	NA
	TRINITY_DN62783_c0_g1	7.92526	1.72e-05	0.000229761	UP	TRINITY_DN62783_c0_g1	TraesCS7B01G342500.1	856	906	954	5.25e-17	TraesCS7B01G342500	chr7B	597463682	597467477	RNA binding protein, putative
	TRINITY_DN1092_c3_g2	7.92478	5.74e-22	1.02e-19	UP	TRINITY_DN1092_c3_g2	TraesCS7D01G392100.1	164	973	1107	0	TraesCS7D01G392100	chr7D	506901196	506904810	Cinnamoyl-CoA reductase 4
	TRINITY_DN260234_c0_g1	7.92147	1.71e-05	0.000228419	UP	NA	NA	NA	NA	NA	NA	NA	NA	NA	NA	NA
	TRINITY_DN57992_c0_g1	7.92147	1.71e-05	0.000228419	UP	NA	NA	NA	NA	NA	NA	NA	NA	NA	NA	NA
	TRINITY_DN14774_c0_g1	7.90812	4.79e-21	7.46e-19	UP	TRINITY_DN14774_c0_g1	TraesCS5D01G335400.1	36	246	246	7.92e-86	TraesCS5D01G335400	chr5D	424602064	424602798	Ribonucleoside-diphosphate reductase
	TRINITY_DN14710_c0_g3	7.90453	3.1e-16	2.43e-14	UP	NA	NA	NA	NA	NA	NA	NA	NA	NA	NA	NA
	TRINITY_DN33212_c0_g1	7.90443	1.97e-05	0.000259827	UP	TRINITY_DN33212_c0_g1	TraesCS2A01G248800.1	1142	1307	1380	1.78e-82	TraesCS2A01G248800	chr2A	372734857	372737383	Fasciclin-like arabinogalactan protein
	TRINITY_DN44975_c1_g2	7.90443	1.97e-05	0.000259827	UP	NA	NA	NA	NA	NA	NA	NA	NA	NA	NA	NA
	TRINITY_DN78129_c0_g1	7.90443	1.97e-05	0.000259827	UP	NA	NA	NA	NA	NA	NA	NA	NA	NA	NA	NA
	TRINITY_DN78213_c0_g1	7.90443	1.97e-05	0.000259827	UP	TRINITY_DN78213_c0_g1	TraesCS6B01G222500.1	456	1	456	0	TraesCS6B01G222500	chr6B	321297148	321297603	Retrovirus-related Pol polyprotein from transposon TNT 1-94
	TRINITY_DN23948_c1_g1	7.90059	1.93e-05	0.000255201	UP	TRINITY_DN23948_c1_g1	TraesCS7B01G261800.1	1216	1305	1560	8.12e-23	TraesCS7B01G261800	chr7B	482237953	482248003	Histone deacetylase
	TRINITY_DN18043_c1_g1	7.86947	3.66e-13	1.79e-11	UP	TRINITY_DN18043_c1_g1	TraesCS7D01G525800.1	1378	3515	3522	0	TraesCS7D01G525800	chr7D	621293777	621298645	Disease resistance protein RPM1
	TRINITY_DN48983_c0_g1	7.81664	2.78e-17	2.55e-15	UP	TRINITY_DN48983_c0_g1	TraesCS7D01G419300.1	1	121	873	1.21e-57	TraesCS7D01G419300	chr7D	538662073	538663152	Xyloglucan endotransglucosylase/hydrolase
	TRINITY_DN12272_c0_g1	7.80894	5.12e-24	1.27e-21	UP	TRINITY_DN12272_c0_g1	TraesCS3B01G054400.1	149	186	894	9.56e-11	TraesCS3B01G054400	chr3B	28102530	28105634	E3 ubiquitin-protein ligase
	TRINITY_DN22129_c0_g1	7.76534	3.35e-25	1.01e-22	UP	NA	NA	NA	NA	NA	NA	NA	NA	NA	NA	NA
	TRINITY_DN15704_c0_g1	7.73624	3.32e-22	6.1e-20	UP	NA	NA	NA	NA	NA	NA	NA	NA	NA	NA	NA
	TRINITY_DN19212_c0_g1	7.72568	2.36e-20	3.3e-18	UP	NA	NA	NA	NA	NA	NA	NA	NA	NA	NA	NA
	TRINITY_DN27662_c1_g1	7.70402	4.94e-14	2.74e-12	UP	TRINITY_DN27662_c1_g1	TraesCS3D01G064100.1	770	1	1878	0	TraesCS3D01G064100	chr3D	28326412	28329337	Receptor-like protein kinase
	TRINITY_DN236108_c0_g1	7.66102	6.6e-23	1.36e-20	UP	TRINITY_DN236108_c0_g1	TraesCSU01G126700.1	1	1137	1137	0	TraesCSU01G126700	chrUn	108987394	108992252	CsAtPR5
	TRINITY_DN11170_c0_g2	7.65967	8.5e-17	7.29e-15	UP	TRINITY_DN11170_c0_g2	TraesCS1D01G030000.2	1212	1575	1575	1.14e-162	TraesCS1D01G030000	chr1D	11664577	11668738	Receptor protein kinase-like
	TRINITY_DN49316_c0_g1	7.63964	1.4e-20	2.05e-18	UP	TRINITY_DN49316_c0_g1	TraesCS7A01G567500.1	3984	4702	5253	0	TraesCS7A01G567500	chr7A	736088791	736096134	NBS-LRR disease resistance protein
	TRINITY_DN21293_c0_g1	7.62474	1.77e-23	4.02e-21	UP	TRINITY_DN21293_c0_g1	TraesCS7B01G460600.1	1238	1540	2064	1.55e-90	TraesCS7B01G460600	chr7B	718082067	718100392	receptor kinase 1
	TRINITY_DN8076_c1_g1	7.61871	2.49e-22	4.63e-20	UP	TRINITY_DN8076_c1_g1	TraesCS4A01G466400.1	1	1099	1146	0	TraesCS4A01G466400	chr4A	729236778	729237923	F-box protein
	TRINITY_DN17134_c0_g1	7.61669	1.99e-16	1.62e-14	UP	TRINITY_DN17134_c0_g1	TraesCS2B01G055000.1	1742	3130	3471	0	TraesCS2B01G055000	chr2B	26848946	26857277	NBS-LRR disease resistance protein-like
	TRINITY_DN3751_c3_g1	7.57074	5.38e-16	4.08e-14	UP	NA	NA	NA	NA	NA	NA	NA	NA	NA	NA	NA
	TRINITY_DN74627_c1_g1	7.56304	5.76e-12	2.36e-10	UP	TRINITY_DN74627_c1_g1	TraesCS3A01G518300.1	173	390	954	4.97e-85	TraesCS3A01G518300	chr3A	735846064	735847112	Late embryogenesis abundant protein
	TRINITY_DN14187_c0_g1	7.56266	1.18e-20	1.74e-18	UP	NA	NA	NA	NA	NA	NA	NA	NA	NA	NA	NA
	TRINITY_DN62048_c1_g1	7.56231	1.34e-06	2.34e-05	UP	TRINITY_DN62048_c1_g1	TraesCS2A01G064900.1	1	38	468	1.79e-11	TraesCS2A01G064900	chr2A	29261927	29262565	Heavy metal-associated domain containing protein, expressed
	TRINITY_DN24905_c0_g1	7.52503	3.4e-37	5.5e-34	UP	TRINITY_DN24905_c0_g1	TraesCS2D01G477400.1	2049	1	2049	0	TraesCS2D01G477400	chr2D	579389801	579391849	BED zinc finger,hAT family dimerization domain
	TRINITY_DN15996_c0_g2	7.52089	1.69e-15	1.2e-13	UP	TRINITY_DN15996_c0_g2	TraesCS3A01G447800.1	1234	1295	1521	3.32e-14	TraesCS3A01G447800	chr3A	687674155	687677404	Beta-glucosidase, putative
	TRINITY_DN24177_c0_g2	7.50482	3.07e-14	1.77e-12	UP	NA	NA	NA	NA	NA	NA	NA	NA	NA	NA	NA
	TRINITY_DN14589_c0_g1	7.45687	1.17e-14	7.2e-13	UP	NA	NA	NA	NA	NA	NA	NA	NA	NA	NA	NA
	TRINITY_DN18549_c0_g1	7.42742	3.38e-14	1.94e-12	UP	TRINITY_DN18549_c0_g1	TraesCS2D01G071600.1	1	1509	1509	0	TraesCS2D01G071600	chr2D	30327196	30328809	Cytochrome P450, putative
	TRINITY_DN16157_c0_g1	7.42244	7.28e-15	4.63e-13	UP	TRINITY_DN16157_c0_g1	TraesCS3B01G116900.1	683	857	1932	1.03e-40	TraesCS3B01G116900	chr3B	83881992	83885125	ATP-dependent RNA helicase-like protein
	TRINITY_DN24929_c0_g1	7.42174	1.85e-14	1.1e-12	UP	TRINITY_DN24929_c0_g1	TraesCS7A01G544600.1	1772	2838	3819	0	TraesCS7A01G544600	chr7A	721064677	721074368	receptor kinase 1
	TRINITY_DN210726_c0_g1	7.42082	3.8e-15	2.51e-13	UP	NA	NA	NA	NA	NA	NA	NA	NA	NA	NA	NA
	TRINITY_DN26474_c0_g1	7.41316	4.22e-15	2.78e-13	UP	TRINITY_DN26474_c0_g1	TraesCS3A01G024300.1	388	255	747	2.4e-42	TraesCS3A01G024300	chr3A	13090506	13091607	PAP fibrillin domain containing protein,expressed
	TRINITY_DN24441_c0_g2	7.37143	1.33e-20	1.96e-18	UP	TRINITY_DN24441_c0_g2	TraesCS7B01G354100.1	123	228	918	8.54e-41	TraesCS7B01G354100	chr7B	611961698	611962747	Polyubiquitin
	TRINITY_DN207191_c0_g1	7.36252	1.02e-17	9.93e-16	UP	TRINITY_DN207191_c0_g1	TraesCS5A01G236100.1	186	245	1395	1.91e-23	TraesCS5A01G236100	chr5A	451731086	451735758	Aminotransferase
	TRINITY_DN564_c3_g1	7.34492	2.89e-14	1.68e-12	UP	TRINITY_DN564_c3_g1	TraesCS7D01G531000.1	1086	2138	2274	0	TraesCS7D01G531000	chr7D	625463569	625472005	Coatomer subunit beta'-1
	TRINITY_DN2552_c0_g4	7.31153	2.43e-16	1.94e-14	UP	TRINITY_DN2552_c0_g4	TraesCS7D01G036700.1	2976	3295	3300	4.39e-105	TraesCS7D01G036700	chr7D	18691439	18695264	Receptor-like protein kinase
	TRINITY_DN7048_c1_g1	7.30221	1.49e-12	6.67e-11	UP	TRINITY_DN7048_c1_g1	TraesCS7A01G021700.1	635	2126	3324	0	TraesCS7A01G021700	chr7A	8775286	8780950	Disease resistance protein (NBS-LRR class) family
	TRINITY_DN16258_c0_g1	7.29296	7.21e-18	7.14e-16	UP	TRINITY_DN16258_c0_g1	TraesCS2A01G161900.1	1	195	195	5.26e-98	TraesCS2A01G161900	chr2A	114322937	114323758	P-loop containing nucleoside triphosphate hydrolases superfamily protein
	TRINITY_DN65578_c0_g5	7.28614	6.34e-21	9.67e-19	UP	TRINITY_DN65578_c0_g5	TraesCS7D01G274700.1	23	157	942	4.37e-29	TraesCS7D01G274700	chr7D	264319784	264320725	DUF241 domain protein (DUF241)
	TRINITY_DN104082_c7_g1	7.28262	4.16e-06	6.44e-05	UP	NA	NA	NA	NA	NA	NA	NA	NA	NA	NA	NA
	TRINITY_DN19090_c2_g1	7.281	5.89e-12	2.4e-10	UP	TRINITY_DN19090_c2_g1	TraesCS5D01G004400.1	1569	628	1569	0	TraesCS5D01G004400	chr5D	3632895	3634463	ATP-dependent zinc metalloprotease FtsH
	TRINITY_DN33343_c0_g1	7.27596	6.23e-15	4e-13	UP	TRINITY_DN33343_c0_g1	TraesCS1D01G380300.1	1102	1365	1398	6.76e-23	TraesCS1D01G380300	chr1D	455797479	455798876	Disease resistance protein (TIR-NBS-LRR class)
	TRINITY_DN22123_c2_g1	7.24583	1.95e-13	9.99e-12	UP	NA	NA	NA	NA	NA	NA	NA	NA	NA	NA	NA
	TRINITY_DN110607_c0_g4	7.23024	1.05e-12	4.77e-11	UP	NA	NA	NA	NA	NA	NA	NA	NA	NA	NA	NA
	TRINITY_DN32183_c0_g1	7.18366	2.37e-13	1.2e-11	UP	TRINITY_DN32183_c0_g1	TraesCS3A01G419100.1	941	1037	1185	6.97e-30	TraesCS3A01G419100	chr3A	660864796	660872768	Obg-like ATPase 1
	TRINITY_DN1068_c0_g1	7.17737	3.28e-38	5.96e-35	UP	NA	NA	NA	NA	NA	NA	NA	NA	NA	NA	NA
	TRINITY_DN15201_c0_g2	7.17574	6.85e-16	5.12e-14	UP	TRINITY_DN15201_c0_g2	TraesCS2D01G506200.1	1	1131	1131	0	TraesCS2D01G506200	chr2D	600131249	600134163	Zinc transporter
	TRINITY_DN260633_c0_g1	7.16616	0.00130992	0.0129062	UP	NA	NA	NA	NA	NA	NA	NA	NA	NA	NA	NA
	TRINITY_DN37913_c0_g1	7.13844	4.4e-13	2.12e-11	UP	NA	NA	NA	NA	NA	NA	NA	NA	NA	NA	NA
	TRINITY_DN54601_c0_g1	7.10793	8.14e-13	3.77e-11	UP	TRINITY_DN54601_c0_g1	TraesCS7A01G453300.1	191	452	915	4.62e-101	TraesCS7A01G453300	chr7A	647305836	647307613	Polyubiquitin protein
	TRINITY_DN15405_c1_g1	7.09509	7.03e-12	2.82e-10	UP	NA	NA	NA	NA	NA	NA	NA	NA	NA	NA	NA
	TRINITY_DN29367_c1_g2	7.07879	1.76e-10	5.71e-09	UP	TRINITY_DN29367_c1_g2	TraesCS6D01G380800.1	1	702	702	0	TraesCS6D01G380800	chr6D	461502880	461503581	Ankyrin repeat family protein
	TRINITY_DN27025_c0_g1	7.0648	1.38e-16	1.15e-14	UP	NA	NA	NA	NA	NA	NA	NA	NA	NA	NA	NA
	TRINITY_DN96150_c0_g1	7.06117	1.64e-12	7.25e-11	UP	NA	NA	NA	NA	NA	NA	NA	NA	NA	NA	NA
	TRINITY_DN47468_c0_g1	7.04212	2.15e-12	9.36e-11	UP	TRINITY_DN47468_c0_g1	TraesCS3B01G252400.1	696	764	1026	3.21e-11	TraesCS3B01G252400	chr3B	405657796	405660376	Aldo/keto reductase family oxidoreductase
	TRINITY_DN202324_c0_g1	7.02845	1.11e-22	2.2e-20	UP	TRINITY_DN202324_c0_g1	TraesCS5B01G024400.1	1	612	612	0	TraesCS5B01G024400	chr5B	22529761	22530372	Genome polyprotein
	TRINITY_DN4854_c4_g1	7.0028	2.89e-11	1.06e-09	UP	TRINITY_DN4854_c4_g1	TraesCS3A01G380800.1	447	486	972	2.42e-08	TraesCS3A01G380800	chr3A	631281877	631284673	Nuclear matrix protein 1
	TRINITY_DN2491_c0_g3	6.98863	7.45e-25	2.1e-22	UP	TRINITY_DN2491_c0_g3	TraesCS2A01G345600.2	488	542	576	2.22e-18	TraesCS2A01G345600	chr2A	584047719	584052488	sugar transporter, putative (DUF1195)
	TRINITY_DN20793_c0_g1	6.98454	6.07e-12	2.47e-10	UP	NA	NA	NA	NA	NA	NA	NA	NA	NA	NA	NA
	TRINITY_DN145424_c0_g1	6.97809	6.73e-12	2.71e-10	UP	NA	NA	NA	NA	NA	NA	NA	NA	NA	NA	NA
	TRINITY_DN9464_c1_g1	6.97729	2.58e-10	8.19e-09	UP	TRINITY_DN9464_c1_g1	TraesCS5D01G541400.1	397	1	426	0	TraesCS5D01G541400	chr5D	552052462	552052892	Homoserine kinase
	TRINITY_DN3117_c0_g3	6.94943	6.02e-17	5.27e-15	UP	NA	NA	NA	NA	NA	NA	NA	NA	NA	NA	NA
	TRINITY_DN46444_c0_g1	6.90493	2.33e-11	8.6e-10	UP	NA	NA	NA	NA	NA	NA	NA	NA	NA	NA	NA
	TRINITY_DN11415_c1_g2	6.89131	9.18e-19	1.02e-16	UP	TRINITY_DN11415_c1_g2	TraesCS7D01G525700.1	2967	3376	3498	5.52e-96	TraesCS7D01G525700	chr7D	621260432	621264925	NBS-LRR-like resistance protein
	TRINITY_DN24878_c1_g1	6.85169	1.15e-15	8.37e-14	UP	NA	NA	NA	NA	NA	NA	NA	NA	NA	NA	NA
	TRINITY_DN41064_c0_g1	6.8309	6.93e-08	1.52e-06	UP	TRINITY_DN41064_c0_g1	TraesCS7D01G397500.1	1971	2207	2655	6.77e-114	TraesCS7D01G397500	chr7D	512269731	512273523	DUF1680 domain protein
	TRINITY_DN71330_c2_g1	6.82791	3.5e-18	3.62e-16	UP	TRINITY_DN71330_c2_g1	TraesCSU01G101000.2	278	483	873	4.18e-93	TraesCSU01G101000	chrUn	88995570	88998370	Clathrin light chain
[truncated: 2,424 more rows]

## Sheet: Downregulated_M_vs_P
	Insight into the mechanisms of terminal HS-tolerance in wheat mutant with improved nutritional quality through de novo transcriptome sequencing Ranjeet R. Kumar, Suman Bakshi, Kavita Dubey, Sumedha Hasija, Gyanendra K. Rai, Neelu Jain, Sanjay Jambhulkar, Bhupinder Singh, Gyanendra P. Singh, & Shelly Praveen
	Table S. List of differentially expressed transcripts (downregulated) in wheat mutant over parent as identified through de novo transcriptomic sequenic gusing Illumina HiSeq 4000
	S. No.	logFC	PValue	FDR	DEGType	Trinity_GeneID	Wheat_Transcript_ID	Transcript_Start	Transcript_End	Transcript length	E value	Wheat_Gene_ID	Chromosome	Gene_Start	Gene_End	Description/Protein Name
	TRINITY_DN21163_c0_g1	-14.4487	5.79e-50	7.51e-46	DOWN	TRINITY_DN21163_c0_g1	TraesCS7A01G404300.1	46	260	510	1.04e-96	TraesCS7A01G404300	chr7A	585065981	585066490	Zinc finger A20 and AN1 domain stress-associated protein
	TRINITY_DN186098_c0_g1	-14.4025	5.28e-53	2.4e-48	DOWN	NA	NA	NA	NA	NA	NA	NA	NA	NA	NA	NA
	TRINITY_DN19173_c0_g1	-14.3605	1.69e-37	2.84e-34	DOWN	NA	NA	NA	NA	NA	NA	NA	NA	NA	NA	NA
	TRINITY_DN201331_c0_g1	-14.3217	9.99e-41	2.45e-37	DOWN	NA	NA	NA	NA	NA	NA	NA	NA	NA	NA	NA
	TRINITY_DN41261_c0_g2	-14.2138	2.57e-51	5.83e-47	DOWN	TRINITY_DN41261_c0_g2	TraesCS7B01G025000.1	123	618	618	1.73e-90	TraesCS7B01G025000	chr7B	23638770	23639387	Beta-galactosidase
	TRINITY_DN2384_c0_g1	-14.1254	7.06e-52	2.14e-47	DOWN	NA	NA	NA	NA	NA	NA	NA	NA	NA	NA	NA
	TRINITY_DN13708_c0_g1	-14.0914	6.57e-44	3.51e-40	DOWN	TRINITY_DN13708_c0_g1	TraesCS6B01G058300.1	1913	1998	1998	3.1e-38	TraesCS6B01G058300	chr6B	38763526	38767358	Heat shock 70 kDa protein
	TRINITY_DN53451_c0_g1	-13.9254	2.99e-50	4.53e-46	DOWN	TRINITY_DN53451_c0_g1	TraesCSU01G105300.1	1070	1373	1479	1.13e-132	TraesCSU01G105300	chrUn	92716703	92720318	Catalase
	TRINITY_DN8948_c0_g2	-13.9009	1.52e-49	1.72e-45	DOWN	TRINITY_DN8948_c0_g2	TraesCS7B01G454600.1	1	2367	2373	0	TraesCS7B01G454600	chr7B	715251865	715259121	ARM repeat superfamily protein
	TRINITY_DN19775_c0_g1	-13.8902	3.4e-47	2.57e-43	DOWN	TRINITY_DN19775_c0_g1	TraesCS2B01G137300.1	1133	1361	1440	8.36e-118	TraesCS2B01G137300	chr2B	104233460	104237268	Xylose isomerase
	TRINITY_DN47686_c0_g1	-13.8434	1.36e-38	2.68e-35	DOWN	NA	NA	NA	NA	NA	NA	NA	NA	NA	NA	NA
	TRINITY_DN24614_c0_g1	-13.5082	1.12e-48	1.02e-44	DOWN	TRINITY_DN24614_c0_g1	TraesCS2D01G531800.1	529	591	591	1.19e-19	TraesCS2D01G531800	chr2D	617405627	617406217	N-alpha-acetyltransferase
	TRINITY_DN218060_c0_g1	-13.3325	1.6e-32	1.39e-29	DOWN	NA	NA	NA	NA	NA	NA	NA	NA	NA	NA	NA
	TRINITY_DN12202_c0_g1	-13.3277	4.7e-47	3.04e-43	DOWN	TRINITY_DN12202_c0_g1	TraesCS7D01G454200.1	570	789	1341	3.85e-96	TraesCS7D01G454200	chr7D	573692185	573694994	Tubulin beta chain
	TRINITY_DN12961_c0_g3	-13.2029	4.18e-31	3.06e-28	DOWN	TRINITY_DN12961_c0_g3	TraesCS7A01G426100.1	8	126	870	2.24e-48	TraesCS7A01G426100	chr7A	619165697	619167063	Xyloglucan endotransglucosylase/hydrolase
	TRINITY_DN25126_c0_g5	-13.127	9.12e-46	5.52e-42	DOWN	TRINITY_DN25126_c0_g5	TraesCS3D01G003200.1	480	570	570	7.91e-41	TraesCS3D01G003200	chr3D	1337532	1339476	50S ribosomal protein L6
	TRINITY_DN234106_c0_g1	-13.0684	1.17e-38	2.36e-35	DOWN	NA	NA	NA	NA	NA	NA	NA	NA	NA	NA	NA
	TRINITY_DN55166_c0_g2	-13.0486	1.37e-41	3.66e-38	DOWN	NA	NA	NA	NA	NA	NA	NA	NA	NA	NA	NA
	TRINITY_DN38596_c0_g1	-13.0433	6.57e-20	8.59e-18	DOWN	NA	NA	NA	NA	NA	NA	NA	NA	NA	NA	NA
	TRINITY_DN2721_c1_g3	-13.0373	2.39e-43	1.06e-39	DOWN	TRINITY_DN2721_c1_g3	TraesCS7B01G354200.1	757	843	843	1.9e-26	TraesCS7B01G354200	chr7B	612255302	612256461	Polyubiquitin
	TRINITY_DN185605_c0_g1	-13.0324	8.65e-42	2.53e-38	DOWN	NA	NA	NA	NA	NA	NA	NA	NA	NA	NA	NA
	TRINITY_DN47096_c0_g2	-13.0226	8.01e-29	4.43e-26	DOWN	NA	NA	NA	NA	NA	NA	NA	NA	NA	NA	NA
	TRINITY_DN14494_c0_g1	-12.9806	7.91e-43	3.23e-39	DOWN	TRINITY_DN14494_c0_g1	TraesCS2B01G620600.1	1072	1119	1119	3.4e-17	TraesCS2B01G620600	chr2B	795045675	795048475	BTB/POZ domain-containing protein TNFAIP1 isoform 1
	TRINITY_DN218887_c0_g1	-12.9685	3.71e-35	4.67e-32	DOWN	NA	NA	NA	NA	NA	NA	NA	NA	NA	NA	NA
	TRINITY_DN66552_c0_g1	-12.9196	1e-31	7.82e-29	DOWN	NA	NA	NA	NA	NA	NA	NA	NA	NA	NA	NA
	TRINITY_DN7225_c0_g2	-12.9181	7.72e-34	8.05e-31	DOWN	TRINITY_DN7225_c0_g2	TraesCS2D01G505800.1	1	234	234	2.47e-97	TraesCS2D01G505800	chr2D	599919961	599920404	Zn-dependent exopeptidases superfamily protein
	TRINITY_DN16931_c0_g2	-12.7643	8.48e-28	3.87e-25	DOWN	NA	NA	NA	NA	NA	NA	NA	NA	NA	NA	NA
	TRINITY_DN17420_c0_g1	-12.7594	8.53e-43	3.23e-39	DOWN	NA	NA	NA	NA	NA	NA	NA	NA	NA	NA	NA
	TRINITY_DN946_c1_g2	-12.7556	8.24e-43	3.23e-39	DOWN	NA	NA	NA	NA	NA	NA	NA	NA	NA	NA	NA
	TRINITY_DN61844_c0_g1	-12.7343	1.21e-42	4.23e-39	DOWN	NA	NA	NA	NA	NA	NA	NA	NA	NA	NA	NA
	TRINITY_DN15530_c0_g1	-12.7118	7.87e-35	9.52e-32	DOWN	TRINITY_DN15530_c0_g1	TraesCS7A01G381100.1	1014	1082	1083	1.49e-25	TraesCS7A01G381100	chr7A	556159456	556161075	Fructose-bisphosphate aldolase
	TRINITY_DN236412_c0_g1	-12.6763	5.36e-28	2.5e-25	DOWN	NA	NA	NA	NA	NA	NA	NA	NA	NA	NA	NA
	TRINITY_DN9744_c0_g2	-12.6451	8.25e-40	1.83e-36	DOWN	TRINITY_DN9744_c0_g2	TraesCS6B01G091800.1	1	249	255	1.31e-86	TraesCS6B01G091800	chr6B	67500003	67500257	EGG APPARATUS-1 protein
	TRINITY_DN12296_c0_g1	-12.6331	2.67e-28	1.32e-25	DOWN	TRINITY_DN12296_c0_g1	TraesCS7A01G471000.1	1	224	1599	3.54e-98	TraesCS7A01G471000	chr7A	667211212	667214217	ATP-dependent zinc metalloprotease FTSH protein
	TRINITY_DN185930_c0_g1	-12.6172	8.1e-35	9.67e-32	DOWN	NA	NA	NA	NA	NA	NA	NA	NA	NA	NA	NA
	TRINITY_DN11938_c0_g3	-12.6113	2.64e-41	6.84e-38	DOWN	NA	NA	NA	NA	NA	NA	NA	NA	NA	NA	NA
	TRINITY_DN18266_c0_g1	-12.5367	6.53e-39	1.35e-35	DOWN	TRINITY_DN18266_c0_g1	TraesCS5A01G073800.1	1	60	249	4.34e-22	TraesCS5A01G073800	chr5A	86181804	86183272	Ubiquitin
	TRINITY_DN946_c1_g1	-12.5246	4.05e-40	9.18e-37	DOWN	TRINITY_DN946_c1_g1	TraesCS6D01G004800.1	849	876	1287	9.82e-06	TraesCS6D01G004800	chr6D	2246606	2250464	tetratricopeptide repeat (TPR)-containing protein
	TRINITY_DN16086_c0_g2	-12.4912	1.43e-25	4.65e-23	DOWN	NA	NA	NA	NA	NA	NA	NA	NA	NA	NA	NA
	TRINITY_DN174507_c0_g1	-12.4699	4.06e-47	2.83e-43	DOWN	TRINITY_DN174507_c0_g1	TraesCS1A01G351200.1	474	740	765	2.34e-25	TraesCS1A01G351200	chr1A	535769472	535770236	ATP-dependent RNA helicase
	TRINITY_DN1363_c9_g1	-12.4524	3.57e-39	7.72e-36	DOWN	NA	NA	NA	NA	NA	NA	NA	NA	NA	NA	NA
	TRINITY_DN19869_c0_g1	-12.4522	1.13e-23	2.65e-21	DOWN	TRINITY_DN19869_c0_g1	TraesCS7A01G460000.1	76	360	360	3.51e-99	TraesCS7A01G460000	chr7A	655446833	655448174	Cell division cycle 5-like protein
	TRINITY_DN237852_c0_g1	-12.4415	3.13e-22	5.78e-20	DOWN	TRINITY_DN237852_c0_g1	TraesCS3B01G004500.1	1	156	951	2.54e-75	TraesCS3B01G004500	chr3B	2507478	2508919	Isoflavone reductase-like protein
	TRINITY_DN4031_c0_g3	-12.418	5.18e-27	2.13e-24	DOWN	TRINITY_DN4031_c0_g3	TraesCS7A01G453100.1	1	154	1113	4.16e-66	TraesCS7A01G453100	chr7A	646956335	646958750	transmembrane protein, putative (Protein of unknown function, DUF642)
	TRINITY_DN12132_c0_g1	-12.3991	1.26e-33	1.24e-30	DOWN	TRINITY_DN12132_c0_g1	TraesCS4A01G381600.1	3244	3945	3951	2.01e-158	TraesCS4A01G381600	chr4A	658964415	658968365	NBS-LRR disease resistance protein-like protein
	TRINITY_DN1363_c1_g1	-12.3895	2.3e-58	2.09e-53	DOWN	NA	NA	NA	NA	NA	NA	NA	NA	NA	NA	NA
	TRINITY_DN175141_c0_g1	-12.3805	1.26e-37	2.16e-34	DOWN	TRINITY_DN175141_c0_g1	TraesCSU01G149400.1	1	1248	1248	0	TraesCSU01G149400	chrUn	178187546	178189697	Xanthine permease XanP
	TRINITY_DN22046_c0_g1	-12.3479	1.15e-26	4.5e-24	DOWN	NA	NA	NA	NA	NA	NA	NA	NA	NA	NA	NA
	TRINITY_DN9160_c0_g3	-12.2468	1.2e-30	8.21e-28	DOWN	TRINITY_DN9160_c0_g3	TraesCS7B01G483200.1	1	153	507	1.26e-58	TraesCS7B01G483200	chr7B	741250188	741250694	4-hydroxy-4-methyl-2-oxoglutarate aldolase
	TRINITY_DN41250_c5_g1	-12.2314	2.57e-24	6.71e-22	DOWN	TRINITY_DN41250_c5_g1	TraesCS2A01G044900.1	1448	1246	1656	9.64e-102	TraesCS2A01G044900	chr2A	17679674	17681625	Cytochrome P450 family protein
	TRINITY_DN89756_c0_g1	-12.2157	7.14e-19	8.09e-17	DOWN	TRINITY_DN89756_c0_g1	TraesCS6B01G015900.1	1	327	969	2.23e-170	TraesCS6B01G015900	chr6B	9477940	9479012	BURP domain protein RD22
	TRINITY_DN9705_c2_g1	-12.2075	5.61e-37	8.64e-34	DOWN	TRINITY_DN9705_c2_g1	TraesCS2D01G248900.1	128	229	909	6.42e-36	TraesCS2D01G248900	chr2D	293857899	293861174	Syntaxin
	TRINITY_DN1962_c1_g3	-12.1694	8.68e-34	8.75e-31	DOWN	NA	NA	NA	NA	NA	NA	NA	NA	NA	NA	NA
	TRINITY_DN28746_c0_g1	-12.163	6.29e-15	4.03e-13	DOWN	NA	NA	NA	NA	NA	NA	NA	NA	NA	NA	NA
	TRINITY_DN21752_c0_g1	-12.1587	2.23e-33	2.13e-30	DOWN	TRINITY_DN21752_c0_g1	TraesCS3B01G276100.1	168	224	1098	2.13e-11	TraesCS3B01G276100	chr3B	445882777	445888269	tRNA-specific adenosine deaminase
	TRINITY_DN6979_c0_g3	-12.1549	1.68e-31	1.29e-28	DOWN	TRINITY_DN6979_c0_g3	TraesCS7B01G152800.1	1024	1158	1158	1.74e-57	TraesCS7B01G152800	chr7B	203027646	203029886	Basic helix-loop-helix transcription factor
	TRINITY_DN4512_c1_g1	-12.1505	3.86e-36	5.48e-33	DOWN	TRINITY_DN4512_c1_g1	TraesCS7B01G186700.1	170	528	528	1.99e-142	TraesCS7B01G186700	chr7B	312023759	312026125	50S ribosomal protein L14
	TRINITY_DN6905_c0_g1	-12.0989	1.51e-34	1.67e-31	DOWN	TRINITY_DN6905_c0_g1	TraesCS7B01G275300.1	854	996	996	7.71e-60	TraesCS7B01G275300	chr7B	504476618	504483187	SUMO-activating enzyme subunit 1A
	TRINITY_DN24775_c1_g1	-12.0951	1.99e-20	2.83e-18	DOWN	TRINITY_DN24775_c1_g1	TraesCS2A01G007500.1	1347	1618	1707	5.88e-140	TraesCS2A01G007500	chr2A	3333360	3335912	Major Facilitator Superfamily protein, expressed
	TRINITY_DN16867_c0_g1	-12.0462	7.97e-34	8.13e-31	DOWN	TRINITY_DN16867_c0_g1	TraesCS2B01G497800.1	254	513	519	5.09e-97	TraesCS2B01G497800	chr2B	694273052	694275662	CRIB domain-containing protein RIC10
	TRINITY_DN47613_c2_g1	-12.0248	2.49e-24	6.56e-22	DOWN	TRINITY_DN47613_c2_g1	TraesCS4A01G444300.1	2696	2969	3531	4.77e-121	TraesCS4A01G444300	chr4A	712863210	712873993	Phosphoglucan, water dikinase
	TRINITY_DN57213_c0_g2	-12.0209	4.64e-35	5.69e-32	DOWN	TRINITY_DN57213_c0_g2	TraesCS7A01G048900.1	548	341	1116	3.57e-101	TraesCS7A01G048900	chr7A	22917957	22921060	zinc finger B-box protein
	TRINITY_DN233809_c0_g1	-12.0043	1.21e-34	1.39e-31	DOWN	NA	NA	NA	NA	NA	NA	NA	NA	NA	NA	NA
	TRINITY_DN44316_c0_g1	-11.9975	5.99e-31	4.35e-28	DOWN	TRINITY_DN44316_c0_g1	TraesCS7D01G551700.1	256	462	507	1.28e-95	TraesCS7D01G551700	chr7D	634897788	634898294	4-hydroxy-4-methyl-2-oxoglutarate aldolase
	TRINITY_DN11762_c0_g5	-11.9812	7.1e-08	1.55e-06	DOWN	NA	NA	NA	NA	NA	NA	NA	NA	NA	NA	NA
	TRINITY_DN32204_c0_g1	-11.9807	4.81e-26	1.72e-23	DOWN	NA	NA	NA	NA	NA	NA	NA	NA	NA	NA	NA
	TRINITY_DN85296_c0_g1	-11.9638	7.56e-24	1.83e-21	DOWN	TRINITY_DN85296_c0_g1	TraesCS2B01G427900.1	88	1776	1776	0	TraesCS2B01G427900	chr2B	615340523	615343293	Sentrin-specific protease
	TRINITY_DN3748_c0_g1	-11.9523	6.75e-10	2e-08	DOWN	TRINITY_DN3748_c0_g1	TraesCS2A01G288800.1	48	302	903	5.36e-75	TraesCS2A01G288800	chr2A	496588323	496590384	Heavy metal transport/detoxification superfamily protein
	TRINITY_DN9911_c0_g4	-11.9429	3.89e-23	8.39e-21	DOWN	TRINITY_DN9911_c0_g4	TraesCS2A01G025700.1	1062	1185	1185	1.04e-57	TraesCS2A01G025700	chr2A	12101937	12103433	Chalcone synthase
	TRINITY_DN66171_c1_g1	-11.9387	4.87e-30	3.05e-27	DOWN	TRINITY_DN66171_c1_g1	TraesCS5A01G157100.1	736	1029	1398	1.89e-115	TraesCS5A01G157100	chr5A	335709215	335711731	HAT transposon superfamily
	TRINITY_DN26013_c0_g1	-11.9301	9.79e-19	1.08e-16	DOWN	TRINITY_DN26013_c0_g1	TraesCS2A01G007100.1	373	1123	1329	0	TraesCS2A01G007100	chr2A	3100457	3101863	Major Facilitator Superfamily protein, expressed
	TRINITY_DN28859_c0_g1	-11.9209	4.43e-34	4.68e-31	DOWN	TRINITY_DN28859_c0_g1	TraesCSU01G183800.1	872	1123	2088	1.52e-130	TraesCSU01G183800	chrUn	277729719	277732680	Tetratricopeptide repeat-like superfamily protein, putative isoform 1
	TRINITY_DN220044_c0_g1	-11.8892	7.26e-31	5.11e-28	DOWN	NA	NA	NA	NA	NA	NA	NA	NA	NA	NA	NA
	TRINITY_DN1962_c1_g1	-11.8872	6.35e-33	5.76e-30	DOWN	TRINITY_DN1962_c1_g1	TraesCS5D01G543600.1	375	608	1329	6.02e-61	TraesCS5D01G543600	chr5D	553677988	553682129	26S proteasome non-ATPase regulatory subunit
	TRINITY_DN14804_c0_g1	-11.8845	1.98e-33	1.91e-30	DOWN	TRINITY_DN14804_c0_g1	TraesCS7D01G528300.1	1212	1425	1530	8.03e-93	TraesCS7D01G528300	chr7D	623526542	623530969	Zinc finger FYVE domain-containing protein 1
	TRINITY_DN55224_c0_g1	-11.8841	2.27e-32	1.87e-29	DOWN	NA	NA	NA	NA	NA	NA	NA	NA	NA	NA	NA
	TRINITY_DN16210_c0_g2	-11.8756	9.49e-10	2.75e-08	DOWN	TRINITY_DN16210_c0_g2	TraesCS4B01G377900.1	624	690	690	4.35e-26	TraesCS4B01G377900	chr4B	660390557	660397845	Germin-like protein
	TRINITY_DN35301_c0_g1	-11.8438	1e-32	9e-30	DOWN	NA	NA	NA	NA	NA	NA	NA	NA	NA	NA	NA
	TRINITY_DN2878_c0_g2	-11.8142	1.37e-32	1.21e-29	DOWN	TRINITY_DN2878_c0_g2	TraesCS4A01G372600.1	192	386	867	2.16e-62	TraesCS4A01G372600	chr4A	647276847	647279733	Hypersensitive-induced response protein
	TRINITY_DN97404_c0_g1	-11.8122	6.72e-26	2.36e-23	DOWN	TRINITY_DN97404_c0_g1	TraesCS7A01G512300.1	907	990	990	1.13e-28	TraesCS7A01G512300	chr7A	699733347	699736640	Indole-3-glycerol phosphate synthase-like
	TRINITY_DN5655_c0_g3	-11.8079	9.74e-22	1.66e-19	DOWN	TRINITY_DN5655_c0_g3	TraesCS6B01G015900.1	365	933	969	0	TraesCS6B01G015900	chr6B	9477940	9479012	BURP domain protein RD22
	TRINITY_DN13213_c0_g2	-11.7921	2.11e-32	1.81e-29	DOWN	NA	NA	NA	NA	NA	NA	NA	NA	NA	NA	NA
	TRINITY_DN25048_c1_g2	-11.7889	1.28e-19	1.61e-17	DOWN	TRINITY_DN25048_c1_g2	TraesCS6D01G016700.1	440	196	732	4.73e-81	TraesCS6D01G016700	chr6D	6982174	6983479	Glutathione S-transferase
	TRINITY_DN61594_c0_g1	-11.7661	3.8e-31	2.82e-28	DOWN	TRINITY_DN61594_c0_g1	TraesCS7B01G376200.1	1	113	537	3.04e-49	TraesCS7B01G376200	chr7B	641148508	641150425	Zinc-binding protein
	TRINITY_DN63362_c0_g1	-11.7505	5.47e-18	5.51e-16	DOWN	TRINITY_DN63362_c0_g1	TraesCS7D01G483400.1	420	755	1683	2.63e-144	TraesCS7D01G483400	chr7D	593368909	593374285	4-coumarate:CoA ligase
	TRINITY_DN49468_c0_g3	-11.7473	1.46e-26	5.61e-24	DOWN	NA	NA	NA	NA	NA	NA	NA	NA	NA	NA	NA
	TRINITY_DN7325_c0_g2	-11.7349	5.71e-32	4.62e-29	DOWN	TRINITY_DN7325_c0_g2	TraesCS5A01G107100.1	254	282	288	2.12e-06	TraesCS5A01G107100	chr5A	180347402	180347689	kinesin 3
	TRINITY_DN17241_c0_g1	-11.7282	1.48e-30	9.99e-28	DOWN	NA	NA	NA	NA	NA	NA	NA	NA	NA	NA	NA
	TRINITY_DN33635_c1_g1	-11.7253	2.15e-31	1.63e-28	DOWN	TRINITY_DN33635_c1_g1	TraesCS6A01G403700.1	921	1127	1596	1.28e-95	TraesCS6A01G403700	chr6A	610902375	610905987	AT hook motif DNA-binding family protein, putative
	TRINITY_DN4537_c1_g3	-11.7184	3.63e-30	2.32e-27	DOWN	NA	NA	NA	NA	NA	NA	NA	NA	NA	NA	NA
	TRINITY_DN22504_c0_g1	-11.7087	1.52e-15	1.08e-13	DOWN	TRINITY_DN22504_c0_g1	TraesCS7A01G514200.1	975	1044	1044	2.49e-24	TraesCS7A01G514200	chr7A	700503554	700506495	Methyltransferase-like
	TRINITY_DN22590_c1_g1	-11.7051	3.94e-31	2.91e-28	DOWN	TRINITY_DN22590_c1_g1	TraesCS6A01G000600.1	1740	1651	1740	7.04e-34	TraesCS6A01G000600	chr6A	610157	615179	Protein disulfide-isomerase
	TRINITY_DN37737_c0_g1	-11.6913	7.04e-31	4.99e-28	DOWN	NA	NA	NA	NA	NA	NA	NA	NA	NA	NA	NA
	TRINITY_DN4053_c1_g1	-11.6872	1.01e-28	5.35e-26	DOWN	NA	NA	NA	NA	NA	NA	NA	NA	NA	NA	NA
	TRINITY_DN12448_c0_g1	-11.6853	1.56e-12	6.94e-11	DOWN	TRINITY_DN12448_c0_g1	TraesCS2A01G004500.1	1	567	1542	0	TraesCS2A01G004500	chr2A	2405931	2407472	Cytochrome P450 family protein, expressed
	TRINITY_DN1072_c3_g1	-11.6779	2.89e-31	2.17e-28	DOWN	NA	NA	NA	NA	NA	NA	NA	NA	NA	NA	NA
	TRINITY_DN49285_c0_g2	-11.6711	1.42e-11	5.43e-10	DOWN	NA	NA	NA	NA	NA	NA	NA	NA	NA	NA	NA
	TRINITY_DN9490_c0_g2	-11.6653	1.99e-31	1.52e-28	DOWN	NA	NA	NA	NA	NA	NA	NA	NA	NA	NA	NA
	TRINITY_DN65854_c0_g1	-11.6649	7.61e-29	4.24e-26	DOWN	NA	NA	NA	NA	NA	NA	NA	NA	NA	NA	NA
	TRINITY_DN16713_c0_g1	-11.6619	2.74e-27	1.18e-24	DOWN	TRINITY_DN16713_c0_g1	TraesCS7A01G364300.1	108	208	4560	1.36e-29	TraesCS7A01G364300	chr7A	538574080	538583049	RNA polymerase II-associated protein 1
	TRINITY_DN95308_c0_g1	-11.6559	4.92e-27	2.03e-24	DOWN	NA	NA	NA	NA	NA	NA	NA	NA	NA	NA	NA
	TRINITY_DN253_c0_g2	-11.6483	2.67e-30	1.72e-27	DOWN	TRINITY_DN253_c0_g2	TraesCS2B01G549500.1	1402	1621	1626	2.28e-97	TraesCS2B01G549500	chr2B	745714123	745717961	Glutamyl-tRNA(Gln) amidotransferase subunit A
	TRINITY_DN86797_c0_g2	-11.6479	6.66e-31	4.76e-28	DOWN	TRINITY_DN86797_c0_g2	TraesCS6A01G136700.1	1	44	462	6.37e-15	TraesCS6A01G136700	chr6A	107797521	107798928	Polyubiquitin
	TRINITY_DN13453_c0_g1	-11.6251	1.55e-28	8.05e-26	DOWN	NA	NA	NA	NA	NA	NA	NA	NA	NA	NA	NA
	TRINITY_DN8084_c0_g3	-11.6238	5.61e-20	7.41e-18	DOWN	TRINITY_DN8084_c0_g3	TraesCS2A01G006800.1	4112	4417	4434	2.81e-100	TraesCS2A01G006800	chr2A	2915312	2919745	Disease resistance protein (NBS-LRR class) family
	TRINITY_DN15703_c0_g2	-11.6208	3.16e-05	0.000404991	DOWN	TRINITY_DN15703_c0_g2	TraesCS1B01G278100.1	624	1206	1206	0	TraesCS1B01G278100	chr1B	486488542	486490434	Hexosyltransferase
	TRINITY_DN59947_c0_g1	-11.6128	1.96e-20	2.8e-18	DOWN	TRINITY_DN59947_c0_g1	TraesCS7B01G280700.1	1248	1434	1434	8.31e-83	TraesCS7B01G280700	chr7B	513725083	513730513	Polyamine oxidase
	TRINITY_DN34803_c0_g4	-11.6092	5.69e-30	3.54e-27	DOWN	NA	NA	NA	NA	NA	NA	NA	NA	NA	NA	NA
	TRINITY_DN31823_c1_g1	-11.6025	1.59e-21	2.63e-19	DOWN	NA	NA	NA	NA	NA	NA	NA	NA	NA	NA	NA
	TRINITY_DN24041_c0_g2	-11.5992	8.25e-22	1.44e-19	DOWN	NA	NA	NA	NA	NA	NA	NA	NA	NA	NA	NA
	TRINITY_DN27772_c1_g1	-11.5829	3.63e-21	5.71e-19	DOWN	TRINITY_DN27772_c1_g1	TraesCS6B01G015900.1	874	969	969	1.1e-43	TraesCS6B01G015900	chr6B	9477940	9479012	BURP domain protein RD22
	TRINITY_DN15624_c0_g1	-11.5717	9.86e-24	2.33e-21	DOWN	TRINITY_DN15624_c0_g1	TraesCS2A01G010100.1	432	676	1266	2.51e-118	TraesCS2A01G010100	chr2A	3959490	3962611	Pyruvate dehydrogenase E1 component subunit alpha
	TRINITY_DN201406_c0_g1	-11.569	2.07e-30	1.36e-27	DOWN	NA	NA	NA	NA	NA	NA	NA	NA	NA	NA	NA
	TRINITY_DN43456_c0_g1	-11.5645	2.74e-28	1.35e-25	DOWN	TRINITY_DN43456_c0_g1	TraesCS6B01G182700.1	1	123	612	8.42e-59	TraesCS6B01G182700	chr6B	204476209	204477557	senescence-associated family protein, putative (DUF581)
	TRINITY_DN4912_c0_g1	-11.5611	8.2e-29	4.48e-26	DOWN	NA	NA	NA	NA	NA	NA	NA	NA	NA	NA	NA
	TRINITY_DN19420_c0_g1	-11.5605	2.31e-30	1.49e-27	DOWN	TRINITY_DN19420_c0_g1	TraesCS7D01G423400.1	1864	1923	1923	3.88e-22	TraesCS7D01G423400	chr7D	543725129	543729776	Kelch repeat-containing protein 1
	TRINITY_DN88300_c0_g5	-11.5501	4.79e-30	3.02e-27	DOWN	TRINITY_DN88300_c0_g5	TraesCS1A01G228700.1	371	459	459	3.54e-38	TraesCS1A01G228700	chr1A	400955575	400956033	Histone H2B
	TRINITY_DN24564_c0_g1	-11.5296	4.5e-07	8.58e-06	DOWN	TRINITY_DN24564_c0_g1	TraesCS7B01G354800.1	183	562	609	3.78e-163	TraesCS7B01G354800	chr7B	613176602	613178954	Carbonic anhydrase
	TRINITY_DN203168_c0_g1	-11.524	1.3e-26	5.03e-24	DOWN	NA	NA	NA	NA	NA	NA	NA	NA	NA	NA	NA
	TRINITY_DN61241_c0_g1	-11.5195	1.03e-28	5.4e-26	DOWN	NA	NA	NA	NA	NA	NA	NA	NA	NA	NA	NA
	TRINITY_DN32590_c0_g1	-11.512	8.8e-30	5.36e-27	DOWN	TRINITY_DN32590_c0_g1	TraesCS2B01G620900.1	689	921	1029	1.12e-106	TraesCS2B01G620900	chr2B	795062828	795064882	EamA-like transporter family protein
	TRINITY_DN15307_c2_g1	-11.5098	3.41e-26	1.24e-23	DOWN	TRINITY_DN15307_c2_g1	TraesCS1B01G374100.2	1733	1531	1740	9.64e-102	TraesCS1B01G374100	chr1B	604549290	604553146	IQ domain-containing protein
	TRINITY_DN597_c3_g1	-11.5033	4.46e-28	2.12e-25	DOWN	NA	NA	NA	NA	NA	NA	NA	NA	NA	NA	NA
	TRINITY_DN32731_c0_g1	-11.494	1.84e-25	5.89e-23	DOWN	TRINITY_DN32731_c0_g1	TraesCS5A01G411200.1	325	477	1866	2.6e-52	TraesCS5A01G411200	chr5A	599809090	599814381	Succinate dehydrogenase [ubiquinone] flavoprotein subunit, mitochondrial
	TRINITY_DN222562_c0_g1	-11.486	1.01e-28	5.35e-26	DOWN	TRINITY_DN222562_c0_g1	TraesCS7A01G047500.1	465	906	906	0	TraesCS7A01G047500	chr7A	21514000	21514905	Segregation and condensation protein A
	TRINITY_DN31693_c1_g1	-11.4804	1.28e-27	5.72e-25	DOWN	TRINITY_DN31693_c1_g1	TraesCS6D01G381400.1	830	1173	1431	7.31e-165	TraesCS6D01G381400	chr6D	461854537	461856190	F-box/RNI-like/FBD-like domains-containing protein
	TRINITY_DN31686_c0_g1	-11.4635	4.2e-28	2.03e-25	DOWN	NA	NA	NA	NA	NA	NA	NA	NA	NA	NA	NA
	TRINITY_DN25780_c0_g1	-11.4538	2.33e-29	1.38e-26	DOWN	TRINITY_DN25780_c0_g1	TraesCS7A01G426700.1	596	831	870	2.51e-88	TraesCS7A01G426700	chr7A	619632998	619634026	Xyloglucan endotransglucosylase/hydrolase
	TRINITY_DN11698_c0_g1	-11.451	1.18e-05	0.000163579	DOWN	TRINITY_DN11698_c0_g1	TraesCS5D01G370500.1	892	1168	1527	2.16e-139	TraesCS5D01G370500	chr5D	445318120	445319871	Cytochrome P450 family protein, expressed
	TRINITY_DN94014_c1_g1	-11.4497	2.48e-24	6.53e-22	DOWN	NA	NA	NA	NA	NA	NA	NA	NA	NA	NA	NA
	TRINITY_DN18197_c0_g1	-11.4494	8.81e-29	4.79e-26	DOWN	TRINITY_DN18197_c0_g1	TraesCS2A01G010200.1	35	126	1233	1.28e-31	TraesCS2A01G010200	chr2A	3964870	3967583	StAR-related lipid transfer protein
	TRINITY_DN3447_c1_g1	-11.4485	5.43e-26	1.93e-23	DOWN	NA	NA	NA	NA	NA	NA	NA	NA	NA	NA	NA
	TRINITY_DN16918_c0_g2	-11.4436	4.74e-29	2.69e-26	DOWN	NA	NA	NA	NA	NA	NA	NA	NA	NA	NA	NA
	TRINITY_DN3138_c1_g1	-11.4411	3.08e-29	1.78e-26	DOWN	NA	NA	NA	NA	NA	NA	NA	NA	NA	NA	NA
	TRINITY_DN478_c0_g1	-11.4163	1.29e-11	4.95e-10	DOWN	NA	NA	NA	NA	NA	NA	NA	NA	NA	NA	NA
	TRINITY_DN15256_c0_g1	-11.4058	2.88e-24	7.42e-22	DOWN	TRINITY_DN15256_c0_g1	TraesCS7D01G442500.1	87	302	1113	6.23e-99	TraesCS7D01G442500	chr7D	561952526	561954979	transmembrane protein, putative (Protein of unknown function, DUF642)
	TRINITY_DN42167_c1_g1	-11.4023	1.83e-16	1.49e-14	DOWN	TRINITY_DN42167_c1_g1	TraesCS7B01G484400.1	328	369	369	8.86e-14	TraesCS7B01G484400	chr7B	741572804	741573353	Gibberellin-regulated protein 2, putative
	TRINITY_DN14305_c0_g2	-11.4018	1.48e-26	5.66e-24	DOWN	TRINITY_DN14305_c0_g2	TraesCS4B01G148800.1	433	520	534	1.62e-27	TraesCS4B01G148800	chr4B	217596586	217610212	Long-chain specific acyl-CoA dehydrogenase, mitochondrial
	TRINITY_DN18069_c1_g1	-11.3973	1.45e-28	7.59e-26	DOWN	TRINITY_DN18069_c1_g1	TraesCS6D01G033200.1	53	127	282	7.43e-22	TraesCS6D01G033200	chr6D	14011293	14013117	Ribosomal protein L37
	TRINITY_DN6744_c1_g4	-11.3959	7.21e-25	2.05e-22	DOWN	NA	NA	NA	NA	NA	NA	NA	NA	NA	NA	NA
	TRINITY_DN31365_c0_g1	-11.3936	3.85e-18	3.97e-16	DOWN	NA	NA	NA	NA	NA	NA	NA	NA	NA	NA	NA
	TRINITY_DN44248_c0_g2	-11.3757	1.34e-27	5.95e-25	DOWN	TRINITY_DN44248_c0_g2	TraesCS7A01G016400.1	1	384	384	0	TraesCS7A01G016400	chr7A	7064964	7066940	RING/U-box superfamily protein
	TRINITY_DN41745_c1_g1	-11.3694	4.71e-26	1.69e-23	DOWN	NA	NA	NA	NA	NA	NA	NA	NA	NA	NA	NA
	TRINITY_DN32763_c0_g1	-11.3627	1.89e-28	9.68e-26	DOWN	NA	NA	NA	NA	NA	NA	NA	NA	NA	NA	NA
	TRINITY_DN60272_c0_g1	-11.3531	2.22e-28	1.12e-25	DOWN	TRINITY_DN60272_c0_g1	TraesCS7B01G489700.1	905	1149	1533	5.47e-110	TraesCS7B01G489700	chr7B	743616728	743620219	Signal peptide peptidase-like protein
	TRINITY_DN28918_c0_g2	-11.3474	2.81e-25	8.67e-23	DOWN	TRINITY_DN28918_c0_g2	TraesCS2D01G513500.1	411	683	1080	1.68e-130	TraesCS2D01G513500	chr2D	605367756	605371189	4-hydroxy-tetrahydrodipicolinate synthase
	TRINITY_DN18689_c0_g1	-11.3458	3.08e-21	4.92e-19	DOWN	TRINITY_DN18689_c0_g1	TraesCS6D01G028200.1	6497	6544	6546	4.04e-17	TraesCS6D01G028200	chr6D	10905872	10913503	U5 small nuclear ribonucleoprotein helicase
	TRINITY_DN25168_c0_g1	-11.3452	9.66e-28	4.38e-25	DOWN	TRINITY_DN25168_c0_g1	TraesCS7B01G432900.1	394	647	1464	1.22e-111	TraesCS7B01G432900	chr7B	700570538	700578535	Sugar transporter
	TRINITY_DN31608_c0_g1	-11.3444	3.02e-28	1.48e-25	DOWN	TRINITY_DN31608_c0_g1	TraesCS5A01G157100.1	69	418	1398	3.54e-148	TraesCS5A01G157100	chr5A	335709215	335711731	HAT transposon superfamily
	TRINITY_DN5914_c0_g3	-11.3367	9.39e-26	3.16e-23	DOWN	TRINITY_DN5914_c0_g3	TraesCS7A01G562700.1	439	567	567	1.17e-48	TraesCS7A01G562700	chr7A	733337850	733339850	Coiled-coil domain-containing protein 12
	TRINITY_DN14228_c0_g1	-11.3358	7.76e-23	1.58e-20	DOWN	TRINITY_DN14228_c0_g1	TraesCS2A01G042100.1	410	656	1071	1.94e-124	TraesCS2A01G042100	chr2A	16881213	16888128	Phosphoglycerate mutase-like protein
	TRINITY_DN30085_c0_g1	-11.3324	3.74e-28	1.81e-25	DOWN	TRINITY_DN30085_c0_g1	TraesCS1A01G101700.1	2129	2074	2196	1.39e-18	TraesCS1A01G101700	chr1A	97954954	97957149	Disease resistance protein (NBS-LRR class) family
	TRINITY_DN233542_c0_g1	-11.3244	5.03e-14	2.78e-12	DOWN	NA	NA	NA	NA	NA	NA	NA	NA	NA	NA	NA
	TRINITY_DN4912_c0_g2	-11.3221	2.47e-27	1.07e-24	DOWN	NA	NA	NA	NA	NA	NA	NA	NA	NA	NA	NA
	TRINITY_DN10314_c0_g2	-11.3157	1.34e-23	3.09e-21	DOWN	TRINITY_DN10314_c0_g2	TraesCS7A01G247400.1	41	579	579	0	TraesCS7A01G247400	chr7A	228031380	228032067	HAT family dimerization domain-containing protein
	TRINITY_DN86296_c2_g1	-11.3091	8.17e-24	1.96e-21	DOWN	TRINITY_DN86296_c2_g1	TraesCS6D01G172600.1	507	238	810	1.69e-140	TraesCS6D01G172600	chr6D	159515506	159517894	Tetraspanin family protein
	TRINITY_DN23029_c0_g1	-11.3072	9.46e-22	1.62e-19	DOWN	TRINITY_DN23029_c0_g1	TraesCS6A01G401500.1	729	504	957	3.83e-116	TraesCS6A01G401500	chr6A	609972318	609973926	Mesoderm induction early response protein 1, putative isoform 1
	TRINITY_DN13130_c0_g1	-11.2969	6.34e-11	2.19e-09	DOWN	NA	NA	NA	NA	NA	NA	NA	NA	NA	NA	NA
	TRINITY_DN22468_c1_g1	-11.2773	1.94e-26	7.31e-24	DOWN	NA	NA	NA	NA	NA	NA	NA	NA	NA	NA	NA
	TRINITY_DN26659_c0_g1	-11.276	4.68e-25	1.38e-22	DOWN	TRINITY_DN26659_c0_g1	TraesCS7B01G320100.2	2257	2528	3072	6.02e-130	TraesCS7B01G320100	chr7B	570451059	570459602	Zinc-transporting ATPase
	TRINITY_DN55490_c0_g1	-11.2753	3.17e-27	1.35e-24	DOWN	NA	NA	NA	NA	NA	NA	NA	NA	NA	NA	NA
	TRINITY_DN17795_c0_g1	-11.274	3.35e-06	5.31e-05	DOWN	TRINITY_DN17795_c0_g1	TraesCS7B01G291900.1	1753	2038	2109	1.03e-147	TraesCS7B01G291900	chr7B	528763235	528767768	Receptor-like protein kinase
	TRINITY_DN106286_c3_g1	-11.2737	7.92e-27	3.18e-24	DOWN	NA	NA	NA	NA	NA	NA	NA	NA	NA	NA	NA
	TRINITY_DN23815_c0_g1	-11.2699	9.91e-14	5.27e-12	DOWN	TRINITY_DN23815_c0_g1	TraesCS2A01G532700.1	224	261	261	1.36e-11	TraesCS2A01G532700	chr2A	748960949	748961413	Wound-responsive family protein
	TRINITY_DN38515_c0_g2	-11.2692	1.47e-27	6.52e-25	DOWN	NA	NA	NA	NA	NA	NA	NA	NA	NA	NA	NA
	TRINITY_DN13840_c0_g1	-11.256	7.68e-26	2.65e-23	DOWN	TRINITY_DN13840_c0_g1	TraesCS6B01G437400.2	1	492	492	0	TraesCS6B01G437400	chr6B	704411117	704411974	Subtilase family protein
	TRINITY_DN1976_c0_g2	-11.2531	3.1e-27	1.33e-24	DOWN	NA	NA	NA	NA	NA	NA	NA	NA	NA	NA	NA
	TRINITY_DN201545_c0_g1	-11.2518	2.14e-27	9.28e-25	DOWN	NA	NA	NA	NA	NA	NA	NA	NA	NA	NA	NA
	TRINITY_DN54173_c0_g1	-11.2507	1.19e-24	3.24e-22	DOWN	TRINITY_DN54173_c0_g1	TraesCS7A01G529900.1	770	985	2424	1.33e-105	TraesCS7A01G529900	chr7A	709405013	709409966	Chaperone protein htpG family protein
	TRINITY_DN62968_c1_g1	-11.2395	4.96e-26	1.77e-23	DOWN	TRINITY_DN62968_c1_g1	TraesCS5A01G550800.1	68	168	534	8.45e-33	TraesCS5A01G550800	chr5A	704344835	704346403	Nascent polypeptide-associated complex subunit beta
	TRINITY_DN8688_c0_g3	-11.236	2.24e-26	8.32e-24	DOWN	TRINITY_DN8688_c0_g3	TraesCS7D01G539400.1	145	221	240	4.4e-21	TraesCS7D01G539400	chr7D	629781759	629782221	Kinesin-like
	TRINITY_DN1259_c2_g1	-11.2303	1.08e-25	3.58e-23	DOWN	NA	NA	NA	NA	NA	NA	NA	NA	NA	NA	NA
	TRINITY_DN15820_c0_g3	-11.2176	3.65e-27	1.53e-24	DOWN	NA	NA	NA	NA	NA	NA	NA	NA	NA	NA	NA
	TRINITY_DN29785_c0_g4	-11.2157	3.79e-27	1.59e-24	DOWN	NA	NA	NA	NA	NA	NA	NA	NA	NA	NA	NA
	TRINITY_DN55245_c0_g1	-11.2152	2.42e-25	7.55e-23	DOWN	TRINITY_DN55245_c0_g1	TraesCS4A01G025600.2	354	666	669	8.78e-144	TraesCS4A01G025600	chr4A	17733701	17736515	HAT family dimerisation domain containing protein, expressed
	TRINITY_DN10903_c0_g2	-11.2139	4.49e-19	5.21e-17	DOWN	NA	NA	NA	NA	NA	NA	NA	NA	NA	NA	NA
	TRINITY_DN16324_c0_g1	-11.2064	9.14e-25	2.54e-22	DOWN	TRINITY_DN16324_c0_g1	TraesCS7B01G431600.1	497	774	1839	1.33e-121	TraesCS7B01G431600	chr7B	699840115	699843145	XH/XS domain-containing family protein
	TRINITY_DN29886_c0_g2	-11.2039	1.24e-25	4.06e-23	DOWN	TRINITY_DN29886_c0_g2	TraesCS7D01G543000.1	2491	2655	3327	1.82e-38	TraesCS7D01G543000	chr7D	631802574	631808462	RING/FYVE/PHD zinc finger protein
	TRINITY_DN110513_c0_g1	-11.1979	2.05e-23	4.6e-21	DOWN	NA	NA	NA	NA	NA	NA	NA	NA	NA	NA	NA
	TRINITY_DN17170_c0_g1	-11.194	1.06e-26	4.16e-24	DOWN	TRINITY_DN17170_c0_g1	TraesCS6B01G121900.1	1049	1080	1755	3.9e-06	TraesCS6B01G121900	chr6B	116602993	116607207	Anthranilate phosphoribosyltransferase
	TRINITY_DN109657_c0_g1	-11.1877	1.11e-16	9.37e-15	DOWN	TRINITY_DN109657_c0_g1	TraesCSU01G165000.1	1	657	1809	0	TraesCSU01G165000	chrUn	239738015	239739823	Arginine decarboxylase
	TRINITY_DN51767_c0_g1	-11.1715	1.77e-22	3.35e-20	DOWN	TRINITY_DN51767_c0_g1	TraesCS5A01G557100.1	510	357	510	8.96e-73	TraesCS5A01G557100	chr5A	708183055	708184124	2-oxoglutarate (2OG) and Fe(II)-dependent oxygenase superfamily protein, putative
	TRINITY_DN36096_c0_g2	-11.1706	7.67e-26	2.65e-23	DOWN	NA	NA	NA	NA	NA	NA	NA	NA	NA	NA	NA
	TRINITY_DN19800_c0_g1	-11.1562	1.72e-26	6.54e-24	DOWN	NA	NA	NA	NA	NA	NA	NA	NA	NA	NA	NA
	TRINITY_DN124434_c0_g1	-11.1488	6.9e-24	1.67e-21	DOWN	TRINITY_DN124434_c0_g1	TraesCS2A01G014300.1	1	195	654	3.14e-97	TraesCS2A01G014300	chr2A	5690317	5692857	Inosine-5'-monophosphate dehydrogenase
	TRINITY_DN26244_c0_g1	-11.1451	7.36e-26	2.57e-23	DOWN	NA	NA	NA	NA	NA	NA	NA	NA	NA	NA	NA
	TRINITY_DN22982_c0_g1	-11.1431	2.71e-25	8.39e-23	DOWN	TRINITY_DN22982_c0_g1	TraesCS2A01G036300.1	343	588	1206	6.96e-124	TraesCS2A01G036300	chr2A	15607548	15612726	3-ketoacyl-CoA thiolase
	TRINITY_DN17337_c0_g1	-11.1405	1.09e-25	3.62e-23	DOWN	NA	NA	NA	NA	NA	NA	NA	NA	NA	NA	NA
	TRINITY_DN35923_c0_g1	-11.135	1.21e-25	3.99e-23	DOWN	TRINITY_DN35923_c0_g1	TraesCS7D01G374600.1	131	532	1146	2.41e-175	TraesCS7D01G374600	chr7D	484925190	484928589	TPX2 (Targeting protein for Xklp2) family protein
	TRINITY_DN66377_c1_g1	-11.133	1.95e-25	6.2e-23	DOWN	TRINITY_DN66377_c1_g1	TraesCS2A01G036300.1	1091	1206	1206	1.01e-54	TraesCS2A01G036300	chr2A	15607548	15612726	3-ketoacyl-CoA thiolase
	TRINITY_DN59495_c0_g2	-11.1241	7.61e-26	2.64e-23	DOWN	NA	NA	NA	NA	NA	NA	NA	NA	NA	NA	NA
	TRINITY_DN40433_c1_g5	-11.113	5.16e-25	1.5e-22	DOWN	NA	NA	NA	NA	NA	NA	NA	NA	NA	NA	NA
	TRINITY_DN217382_c0_g1	-11.1107	9.2e-31	6.42e-28	DOWN	NA	NA	NA	NA	NA	NA	NA	NA	NA	NA	NA
	TRINITY_DN18357_c0_g1	-11.1044	5.92e-26	2.09e-23	DOWN	NA	NA	NA	NA	NA	NA	NA	NA	NA	NA	NA
	TRINITY_DN2724_c0_g2	-11.0995	5.27e-25	1.52e-22	DOWN	TRINITY_DN2724_c0_g2	TraesCS2D01G531800.1	529	559	591	1.62e-07	TraesCS2D01G531800	chr2D	617405627	617406217	N-alpha-acetyltransferase
	TRINITY_DN43050_c0_g1	-11.0986	9.48e-24	2.25e-21	DOWN	NA	NA	NA	NA	NA	NA	NA	NA	NA	NA	NA
	TRINITY_DN46170_c0_g1	-11.0921	3.29e-25	9.98e-23	DOWN	TRINITY_DN46170_c0_g1	TraesCS3B01G086400.1	3254	3515	3822	4.39e-136	TraesCS3B01G086400	chr3B	54752105	54758652	E3 ubiquitin-protein ligase
	TRINITY_DN13588_c1_g1	-11.0918	9.6e-26	3.2e-23	DOWN	NA	NA	NA	NA	NA	NA	NA	NA	NA	NA	NA
	TRINITY_DN28027_c1_g1	-11.0909	7.1e-25	2.03e-22	DOWN	TRINITY_DN28027_c1_g1	TraesCS2B01G440400.1	1536	1412	1536	7.66e-60	TraesCS2B01G440400	chr2B	632404873	632409874	Aminotransferase
	TRINITY_DN18324_c0_g1	-11.0887	1.25e-25	4.1e-23	DOWN	NA	NA	NA	NA	NA	NA	NA	NA	NA	NA	NA
	TRINITY_DN12733_c0_g1	-11.0801	9.43e-22	1.62e-19	DOWN	TRINITY_DN12733_c0_g1	TraesCS2D01G116200.1	1281	1367	1575	2.85e-13	TraesCS2D01G116200	chr2D	64731844	64733709	Small ribosomal subunit biogenesis GTPase RsgA
	TRINITY_DN18736_c0_g3	-11.078	5.1e-13	2.43e-11	DOWN	TRINITY_DN18736_c0_g3	TraesCS7A01G302800.1	5	98	1890	4.34e-36	TraesCS7A01G302800	chr7A	424628348	424633970	XH/XS domain protein
	TRINITY_DN59628_c1_g1	-11.0775	5.99e-25	1.73e-22	DOWN	NA	NA	NA	NA	NA	NA	NA	NA	NA	NA	NA
	TRINITY_DN12828_c0_g3	-11.0681	2.37e-21	3.84e-19	DOWN	NA	NA	NA	NA	NA	NA	NA	NA	NA	NA	NA
	TRINITY_DN50868_c1_g1	-11.0668	1.61e-23	3.66e-21	DOWN	TRINITY_DN50868_c1_g1	TraesCS3A01G074900.1	154	226	933	1.17e-27	TraesCS3A01G074900	chr3A	46729336	46732819	Steroid 5-alpha reductase
	TRINITY_DN49587_c0_g2	-11.0632	1.06e-24	2.91e-22	DOWN	TRINITY_DN49587_c0_g2	TraesCS7B01G494500.1	32	599	2265	5.45e-100	TraesCS7B01G494500	chr7B	746046844	746054275	lectin-receptor kinase
	TRINITY_DN13266_c0_g1	-11.0611	1.86e-24	5e-22	DOWN	TRINITY_DN13266_c0_g1	TraesCS2D01G248900.1	121	229	909	1.25e-39	TraesCS2D01G248900	chr2D	293857899	293861174	Syntaxin
	TRINITY_DN23254_c0_g1	-11.051	3.52e-14	2.01e-12	DOWN	TRINITY_DN23254_c0_g1	TraesCS7B01G442200.1	1	133	609	3.72e-56	TraesCS7B01G442200	chr7B	706977956	706979777	P-loop containing nucleoside triphosphate hydrolases superfamily protein
	TRINITY_DN14888_c2_g1	-11.0366	1.1e-23	2.58e-21	DOWN	TRINITY_DN14888_c2_g1	TraesCS7D01G039800.1	2210	2710	2751	6.47e-150	TraesCS7D01G039800	chr7D	20310877	20313627	NBS-LRR disease resistance protein, putative, expressed
	TRINITY_DN178168_c0_g1	-11.035	3.57e-24	9.07e-22	DOWN	TRINITY_DN178168_c0_g1	TraesCS6A01G341500.1	1	179	216	2.89e-89	TraesCS6A01G341500	chr6A	574249221	574249521	alpha-adaptin
	TRINITY_DN17272_c0_g1	-11.0345	2.95e-22	5.46e-20	DOWN	NA	NA	NA	NA	NA	NA	NA	NA	NA	NA	NA
	TRINITY_DN9160_c0_g2	-11.0305	1.54e-25	5e-23	DOWN	NA	NA	NA	NA	NA	NA	NA	NA	NA	NA	NA
	TRINITY_DN23520_c1_g1	-11.0286	3.29e-25	9.98e-23	DOWN	TRINITY_DN23520_c1_g1	TraesCS5A01G152400.1	150	387	771	2.18e-107	TraesCS5A01G152400	chr5A	329378423	329380761	Ferritin
	TRINITY_DN14236_c0_g2	-11.0264	1.64e-25	5.29e-23	DOWN	NA	NA	NA	NA	NA	NA	NA	NA	NA	NA	NA
	TRINITY_DN69172_c0_g3	-11.0261	1.67e-25	5.34e-23	DOWN	NA	NA	NA	NA	NA	NA	NA	NA	NA	NA	NA
	TRINITY_DN53159_c0_g1	-11.0255	5.21e-20	6.94e-18	DOWN	TRINITY_DN53159_c0_g1	TraesCS7D01G405500.1	358	647	1173	1.38e-131	TraesCS7D01G405500	chr7D	523045580	523048676	12-oxophytodienoate reductase
	TRINITY_DN12720_c0_g2	-11.0215	3.69e-24	9.36e-22	DOWN	NA	NA	NA	NA	NA	NA	NA	NA	NA	NA	NA
	TRINITY_DN95848_c0_g1	-11.0135	5.57e-14	3.07e-12	DOWN	TRINITY_DN95848_c0_g1	TraesCS5D01G311100.1	185	472	1317	3.52e-101	TraesCS5D01G311100	chr5D	407678799	407680252	Polyprotein
	TRINITY_DN18243_c1_g2	-11.0117	3.22e-25	9.83e-23	DOWN	TRINITY_DN18243_c1_g2	TraesCSU01G082200.1	942	1191	1200	1.26e-71	TraesCSU01G082200	chrUn	74853917	74855116	Transposon Ty3-G Gag-Pol polyprotein
	TRINITY_DN25941_c1_g1	-11.0105	3.68e-22	6.7e-20	DOWN	TRINITY_DN25941_c1_g1	TraesCS3D01G012500.1	814	1985	3120	0	TraesCS3D01G012500	chr3D	4356776	4361959	NBS-LRR-like resistance protein
	TRINITY_DN31696_c0_g2	-10.9988	1.14e-20	1.69e-18	DOWN	TRINITY_DN31696_c0_g2	TraesCS1B01G018200.1	493	1383	1833	0	TraesCS1B01G018200	chr1B	8772618	8774769	Arginine decarboxylase
	TRINITY_DN18772_c0_g1	-10.9982	6.75e-25	1.94e-22	DOWN	TRINITY_DN18772_c0_g1	TraesCS1B01G031600.1	1	102	1206	3.33e-40	TraesCS1B01G031600	chr1B	15448355	15451124	lysine ketoglutarate reductase trans-splicing protein (DUF707)
	TRINITY_DN14008_c0_g1	-10.9976	3.09e-11	1.12e-09	DOWN	TRINITY_DN14008_c0_g1	TraesCS7B01G432600.1	48	120	120	4.71e-29	TraesCS7B01G432600	chr7B	700440005	700440124	Rotundifolia-like protein
	TRINITY_DN30194_c0_g1	-10.9953	1.73e-19	2.13e-17	DOWN	TRINITY_DN30194_c0_g1	TraesCS7A01G557700.2	925	1426	3276	0	TraesCS7A01G557700	chr7A	730430976	730434251	NBS-LRR disease resistance protein
	TRINITY_DN36840_c0_g1	-10.994	4.88e-25	1.43e-22	DOWN	TRINITY_DN36840_c0_g1	TraesCS2A01G033400.2	1	1536	1536	0	TraesCS2A01G033400	chr2A	14967453	14971984	Hfr-2-like protein
	TRINITY_DN26312_c1_g1	-10.9884	9.2e-24	2.19e-21	DOWN	NA	NA	NA	NA	NA	NA	NA	NA	NA	NA	NA
	TRINITY_DN20960_c0_g1	-10.9884	9.96e-23	2e-20	DOWN	NA	NA	NA	NA	NA	NA	NA	NA	NA	NA	NA
	TRINITY_DN31989_c0_g1	-10.9866	1.47e-12	6.56e-11	DOWN	TRINITY_DN31989_c0_g1	TraesCS3B01G290800.1	1149	1387	1407	2.51e-98	TraesCS3B01G290800	chr3B	466296792	466299645	GDSL esterase/lipase
	TRINITY_DN18587_c0_g3	-10.9839	3.93e-25	1.17e-22	DOWN	NA	NA	NA	NA	NA	NA	NA	NA	NA	NA	NA
	TRINITY_DN97058_c2_g1	-10.9816	1.31e-23	3.03e-21	DOWN	TRINITY_DN97058_c2_g1	TraesCS2A01G026700.1	639	873	1128	1.85e-119	TraesCS2A01G026700	chr2A	12289632	12291480	2-oxoglutarate (2OG) and Fe(II)-dependent oxygenase superfamily protein, putative
	TRINITY_DN2333_c0_g2	-10.9806	4.7e-25	1.38e-22	DOWN	TRINITY_DN2333_c0_g2	TraesCS6D01G376800.2	225	1156	1218	1.02e-149	TraesCS6D01G376800	chr6D	459548212	459550608	S-adenosylmethionine synthase
	TRINITY_DN61623_c0_g2	-10.9804	1.04e-24	2.87e-22	DOWN	TRINITY_DN61623_c0_g2	TraesCS3D01G364700.1	1160	958	1515	4.78e-73	TraesCS3D01G364700	chr3D	478537990	478540009	Glutamyl-tRNA (Gln) amidotransferase subunit A
	TRINITY_DN10354_c0_g1	-10.9796	8.25e-18	8.12e-16	DOWN	TRINITY_DN10354_c0_g1	TraesCS2A01G235500.1	171	254	546	6.27e-20	TraesCS2A01G235500	chr2A	293934939	293967206	ADP-ribosylation factor
	TRINITY_DN23377_c0_g2	-10.9771	4.62e-25	1.37e-22	DOWN	TRINITY_DN23377_c0_g2	TraesCS7A01G415800.1	1165	1348	1365	2.04e-77	TraesCS7A01G415800	chr7A	608204211	608206223	MYB transcription factor
	TRINITY_DN44610_c0_g1	-10.9739	5.24e-25	1.52e-22	DOWN	TRINITY_DN44610_c0_g1	TraesCS7A01G229300.1	758	845	990	1.22e-32	TraesCS7A01G229300	chr7A	199438676	199441958	Cyclin
	TRINITY_DN36502_c0_g1	-10.9706	4.3e-06	6.64e-05	DOWN	TRINITY_DN36502_c0_g1	TraesCS3B01G170800.1	1	375	375	0	TraesCS3B01G170800	chr3B	171701279	171702110	Non-specific lipid-transfer protein
	TRINITY_DN224037_c0_g1	-10.9685	5.63e-24	1.38e-21	DOWN	TRINITY_DN224037_c0_g1	TraesCS2A01G564000.1	1487	1590	1590	4.68e-48	TraesCS2A01G564000	chr2A	764321984	764324786	E3 ubiquitin-protein ligase
	TRINITY_DN29439_c0_g1	-10.9674	5.39e-22	9.66e-20	DOWN	TRINITY_DN29439_c0_g1	TraesCS5B01G359500.1	1403	1632	2094	5.21e-105	TraesCS5B01G359500	chr5B	539292231	539294869	Octicosapeptide/Phox/Bem1p domain-containing protein / tetratricopeptide repeat-containing protein
	TRINITY_DN51767_c1_g1	-10.9667	4.54e-16	3.47e-14	DOWN	NA	NA	NA	NA	NA	NA	NA	NA	NA	NA	NA
	TRINITY_DN24091_c0_g1	-10.96	8.21e-25	2.3e-22	DOWN	TRINITY_DN24091_c0_g1	TraesCS2B01G626100.1	1197	1350	1350	5.67e-66	TraesCS2B01G626100	chr2B	798590036	798591534	Protein NRT1/ PTR FAMILY 5.5
	TRINITY_DN57440_c1_g1	-10.9578	1.94e-23	4.39e-21	DOWN	TRINITY_DN57440_c1_g1	TraesCS7B01G371900.1	1144	1433	1680	6.4e-130	TraesCS7B01G371900	chr7B	637769054	637774747	Peptidyl-prolyl cis-trans isomerase-like protein
	TRINITY_DN24291_c0_g1	-10.9561	7.35e-25	2.08e-22	DOWN	TRINITY_DN24291_c0_g1	TraesCS1B01G390000.1	235	503	1950	5.81e-140	TraesCS1B01G390000	chr1B	623727410	623731515	Hexosyltransferase
	TRINITY_DN16592_c0_g1	-10.9535	6.81e-25	1.95e-22	DOWN	NA	NA	NA	NA	NA	NA	NA	NA	NA	NA	NA
	TRINITY_DN13079_c0_g1	-10.9486	3.23e-24	8.28e-22	DOWN	TRINITY_DN13079_c0_g1	TraesCS7B01G492900.1	500	537	537	5.07e-09	TraesCS7B01G492900	chr7B	744648123	744652682	NBS-LRR disease resistance protein-like protein
	TRINITY_DN34725_c3_g1	-10.947	8.52e-24	2.03e-21	DOWN	TRINITY_DN34725_c3_g1	TraesCS7D01G438100.1	1358	1633	1863	3.69e-122	TraesCS7D01G438100	chr7D	557403460	557408792	External alternative NAD(P)H-ubiquinone oxidoreductase B2, mitochondrial
	TRINITY_DN46012_c0_g1	-10.9463	1.32e-22	2.61e-20	DOWN	TRINITY_DN46012_c0_g1	TraesCS2A01G568200.1	801	1024	1494	4.91e-115	TraesCS2A01G568200	chr2A	766701553	766707886	Zinc finger protein ZPR1
	TRINITY_DN10855_c0_g1	-10.9459	8.15e-25	2.29e-22	DOWN	NA	NA	NA	NA	NA	NA	NA	NA	NA	NA	NA
	TRINITY_DN33902_c0_g1	-10.9414	5.18e-23	1.1e-20	DOWN	TRINITY_DN33902_c0_g1	TraesCS4A01G074200.2	1247	1486	1836	4.09e-85	TraesCS4A01G074200	chr4A	73450420	73455153	Microtubule associated protein family protein, putative, expressed
	TRINITY_DN51916_c0_g1	-10.9401	1.54e-22	2.99e-20	DOWN	TRINITY_DN51916_c0_g1	TraesCS7D01G543800.2	1	237	984	1.42e-81	TraesCS7D01G543800	chr7D	632006995	632008533	Chloroplast protein
	TRINITY_DN42734_c0_g1	-10.9397	1.08e-24	2.97e-22	DOWN	TRINITY_DN42734_c0_g1	TraesCS1A01G076600.1	1	264	264	2.18e-106	TraesCS1A01G076600	chr1A	59215314	59215577	Transposon protein, putative, CACTA, En/Spm sub-class
	TRINITY_DN32647_c0_g1	-10.9387	1.38e-24	3.77e-22	DOWN	NA	NA	NA	NA	NA	NA	NA	NA	NA	NA	NA
	TRINITY_DN49924_c1_g1	-10.9356	8.51e-11	2.89e-09	DOWN	TRINITY_DN49924_c1_g1	TraesCS1D01G015800.1	1652	1952	2118	6.83e-110	TraesCS1D01G015800	chr1D	7346836	7354159	Receptor-like kinase
	TRINITY_DN15608_c0_g1	-10.9343	3.07e-21	4.91e-19	DOWN	TRINITY_DN15608_c0_g1	TraesCS4A01G457700.1	2041	2257	2418	3.79e-91	TraesCS4A01G457700	chr4A	722899809	722905157	Membrane protein of ER body-like protein
	TRINITY_DN193197_c0_g1	-10.9321	5.91e-23	1.24e-20	DOWN	NA	NA	NA	NA	NA	NA	NA	NA	NA	NA	NA
	TRINITY_DN27539_c0_g1	-10.9321	5.91e-23	1.24e-20	DOWN	TRINITY_DN27539_c0_g1	TraesCS7D01G382100.1	676	786	786	1.92e-45	TraesCS7D01G382100	chr7D	495855387	495859510	SNARE
	TRINITY_DN49112_c0_g1	-10.9271	4.43e-21	6.92e-19	DOWN	TRINITY_DN49112_c0_g1	TraesCS2A01G058700.1	1	245	588	1.59e-126	TraesCS2A01G058700	chr2A	24530248	24532648	Chaperone protein DnaJ
	TRINITY_DN19396_c0_g1	-10.9268	4.72e-24	1.18e-21	DOWN	TRINITY_DN19396_c0_g1	TraesCS7A01G422700.1	247	450	804	1.29e-90	TraesCS7A01G422700	chr7A	613176735	613177538	Zinc finger CCHC domain-containing protein 10
	TRINITY_DN20953_c0_g1	-10.9239	1.02e-12	4.67e-11	DOWN	TRINITY_DN20953_c0_g1	TraesCS1A01G018500.1	1685	1976	2073	5.13e-111	TraesCS1A01G018500	chr1A	9549121	9551796	Receptor-like kinase
	TRINITY_DN12181_c0_g1	-10.9191	1.43e-13	7.48e-12	DOWN	TRINITY_DN12181_c0_g1	TraesCS7D01G471300.1	1	130	1893	4.49e-48	TraesCS7D01G471300	chr7D	584853494	584857482	Vacuolar sorting receptor family protein
	TRINITY_DN43215_c0_g1	-10.9177	3.02e-24	7.76e-22	DOWN	TRINITY_DN43215_c0_g1	TraesCS4A01G094200.1	1	363	363	5.15e-155	TraesCS4A01G094200	chr4A	102387584	102388031	B3 domain-containing protein
	TRINITY_DN51969_c2_g1	-10.912	8.1e-20	1.05e-17	DOWN	TRINITY_DN51969_c2_g1	TraesCS2B01G561200.1	58	273	273	1.54e-80	TraesCS2B01G561200	chr2B	753997107	753997379	Wound-responsive family protein
	TRINITY_DN19708_c0_g1	-10.9057	4.36e-24	1.1e-21	DOWN	TRINITY_DN19708_c0_g1	TraesCS2D01G531400.1	1286	1514	1581	4.21e-61	TraesCS2D01G531400	chr2D	617212392	617221132	Serine protease htra2, putative
	TRINITY_DN12132_c0_g3	-10.9009	2.75e-24	7.12e-22	DOWN	TRINITY_DN12132_c0_g3	TraesCSU01G064500.1	1	635	651	2.14e-111	TraesCSU01G064500	chrUn	50626052	50626702	Disease resistance protein (TIR-NBS-LRR class) family
	TRINITY_DN20958_c0_g1	-10.8973	1.75e-16	1.43e-14	DOWN	NA	NA	NA	NA	NA	NA	NA	NA	NA	NA	NA
	TRINITY_DN9059_c0_g4	-10.8965	4.33e-24	1.09e-21	DOWN	TRINITY_DN9059_c0_g4	TraesCS5B01G373800.1	103	204	1383	2.56e-43	TraesCS5B01G373800	chr5B	551416068	551421063	Ulp1 protease family, C-terminal catalytic domain containing protein
	TRINITY_DN18701_c0_g2	-10.8951	2.13e-24	5.68e-22	DOWN	TRINITY_DN18701_c0_g2	TraesCS5D01G362600.1	918	1107	1107	2.88e-82	TraesCS5D01G362600	chr5D	441104295	441107200	Nicotinate-nucleotide pyrophosphorylase [carboxylating]
	TRINITY_DN63366_c3_g1	-10.8916	2.04e-23	4.59e-21	DOWN	TRINITY_DN63366_c3_g1	TraesCS6A01G202900.1	41	315	795	2.75e-143	TraesCS6A01G202900	chr6A	340906089	340919852	Cytochrome b-c1 complex subunit Rieske, mitochondrial
	TRINITY_DN22241_c0_g1	-10.8873	2.45e-24	6.49e-22	DOWN	TRINITY_DN22241_c0_g1	TraesCS2B01G012900.1	1964	2031	2031	2.51e-28	TraesCS2B01G012900	chr2B	6310993	6316291	tRNA-dihydrouridine(47) synthase [NAD(P)(+)]
	TRINITY_DN18771_c0_g1	-10.8859	7.79e-24	1.88e-21	DOWN	TRINITY_DN18771_c0_g1	TraesCS2A01G554500.1	296	526	615	3.15e-92	TraesCS2A01G554500	chr2A	759542939	759552126	DNA-directed RNA polymerase subunit beta
	TRINITY_DN95752_c0_g1	-10.8849	1.29e-23	2.99e-21	DOWN	TRINITY_DN95752_c0_g1	TraesCS7B01G489700.2	1128	1634	1689	0	TraesCS7B01G489700	chr7B	743616728	743620219	Signal peptide peptidase-like protein
	TRINITY_DN42484_c0_g1	-10.8738	8.67e-23	1.75e-20	DOWN	TRINITY_DN42484_c0_g1	TraesCS7A01G326400.1	589	737	1371	4.25e-58	TraesCS7A01G326400	chr7A	474295969	474297884	Tubby-like F-box protein
	TRINITY_DN24441_c4_g1	-10.8624	5.11e-24	1.27e-21	DOWN	TRINITY_DN24441_c4_g1	TraesCS5B01G080200.1	141	352	462	2.29e-68	TraesCS5B01G080200	chr5B	98518976	98520499	Polyubiquitin
	TRINITY_DN33893_c0_g1	-10.8614	3.6e-21	5.68e-19	DOWN	TRINITY_DN33893_c0_g1	TraesCS2A01G007800.1	874	1088	2022	2.2e-108	TraesCS2A01G007800	chr2A	3442409	3447453	tRNA-dihydrouridine(47) synthase [NAD(P)(+)]
	TRINITY_DN88059_c0_g1	-10.8603	3.83e-18	3.95e-16	DOWN	TRINITY_DN88059_c0_g1	TraesCS5B01G161600.1	3	211	315	3.43e-62	TraesCS5B01G161600	chr5B	297984928	297986388	P450 reductase 2
	TRINITY_DN68841_c0_g1	-10.8584	3.53e-09	9.37e-08	DOWN	TRINITY_DN68841_c0_g1	TraesCS2B01G499100.1	718	1043	3027	1.86e-41	TraesCS2B01G499100	chr2B	695373045	695376167	Receptor-kinase, putative
	TRINITY_DN30858_c0_g1	-10.8561	3.73e-18	3.85e-16	DOWN	NA	NA	NA	NA	NA	NA	NA	NA	NA	NA	NA
	TRINITY_DN32059_c0_g1	-10.8555	6.31e-24	1.54e-21	DOWN	TRINITY_DN32059_c0_g1	TraesCS7B01G433400.1	727	1028	1476	6.79e-120	TraesCS7B01G433400	chr7B	700826956	700828431	Amino acid transporter-like protein
	TRINITY_DN19045_c0_g1	-10.854	1.8e-23	4.07e-21	DOWN	NA	NA	NA	NA	NA	NA	NA	NA	NA	NA	NA
	TRINITY_DN26730_c0_g2	-10.8538	6.26e-23	1.3e-20	DOWN	NA	NA	NA	NA	NA	NA	NA	NA	NA	NA	NA
	TRINITY_DN7613_c0_g1	-10.8499	1.1e-21	1.86e-19	DOWN	TRINITY_DN7613_c0_g1	TraesCS7A01G562700.1	499	567	567	7.51e-27	TraesCS7A01G562700	chr7A	733337850	733339850	Coiled-coil domain-containing protein 12
	TRINITY_DN201409_c0_g1	-10.8494	6.32e-23	1.31e-20	DOWN	NA	NA	NA	NA	NA	NA	NA	NA	NA	NA	NA
	TRINITY_DN20512_c0_g2	-10.8478	6.84e-21	1.04e-18	DOWN	TRINITY_DN20512_c0_g2	TraesCS6A01G410700.2	1700	1800	1800	1.34e-46	TraesCS6A01G410700	chr6A	613766998	613771185	Sucrose transporter
	TRINITY_DN229538_c0_g1	-10.8466	4.71e-13	2.26e-11	DOWN	TRINITY_DN229538_c0_g1	TraesCS7B01G412100.1	455	546	546	1.6e-36	TraesCS7B01G412100	chr7B	680161913	680162965	Calmodulin
	TRINITY_DN40809_c0_g1	-10.8453	2.51e-22	4.67e-20	DOWN	NA	NA	NA	NA	NA	NA	NA	NA	NA	NA	NA
	TRINITY_DN15081_c0_g2	-10.8386	4.1e-21	6.43e-19	DOWN	TRINITY_DN15081_c0_g2	TraesCS5D01G111100.1	2	262	327	9.66e-97	TraesCS5D01G111100	chr5D	126252154	126253780	DNA-directed RNA polymerase subunit beta'
	TRINITY_DN20237_c0_g2	-10.8364	3.83e-19	4.5e-17	DOWN	TRINITY_DN20237_c0_g2	TraesCS7A01G557300.2	1	246	1287	7.63e-66	TraesCS7A01G557300	chr7A	729397558	729401208	Phytoene synthase
	TRINITY_DN109652_c0_g1	-10.8322	3.39e-23	7.33e-21	DOWN	NA	NA	NA	NA	NA	NA	NA	NA	NA	NA	NA
	TRINITY_DN34596_c0_g1	-10.8243	8.01e-24	1.93e-21	DOWN	TRINITY_DN34596_c0_g1	TraesCS6D01G201200.1	487	569	570	2e-24	TraesCS6D01G201200	chr6D	283301159	283304178	Glutathione reductase
	TRINITY_DN22508_c0_g1	-10.8175	1.28e-23	2.98e-21	DOWN	TRINITY_DN22508_c0_g1	TraesCS7B01G293500.2	800	1090	1347	8.35e-134	TraesCS7B01G293500	chr7B	530379677	530381853	Amino acid transporter-like protein
	TRINITY_DN52209_c0_g2	-10.8168	9.64e-24	2.28e-21	DOWN	NA	NA	NA	NA	NA	NA	NA	NA	NA	NA	NA
	TRINITY_DN55970_c0_g2	-10.8143	4.49e-08	1.02e-06	DOWN	TRINITY_DN55970_c0_g2	TraesCS3A01G533800.1	1219	1278	1278	3.88e-22	TraesCS3A01G533800	chr3A	746186042	746189006	Pectin acetylesterase
	TRINITY_DN11087_c0_g1	-10.808	1.35e-20	1.98e-18	DOWN	TRINITY_DN11087_c0_g1	TraesCS2A01G000700.1	1	42	699	1.23e-13	TraesCS2A01G000700	chr2A	395708	400932	Histone deacetylase complex subunit SAP30
	TRINITY_DN69050_c0_g1	-10.8055	3.02e-20	4.15e-18	DOWN	TRINITY_DN69050_c0_g1	TraesCS3A01G003900.1	498	827	2064	4.33e-127	TraesCS3A01G003900	chr3A	1925388	1928343	Receptor-like kinase
	TRINITY_DN90979_c0_g1	-10.8037	5.99e-23	1.26e-20	DOWN	TRINITY_DN90979_c0_g1	TraesCS3D01G305700.1	35	85	666	1.22e-18	TraesCS3D01G305700	chr3D	419634464	419635634	Branched-chain-amino-acid aminotransferase
	TRINITY_DN25980_c0_g1	-10.7999	1.7e-22	3.26e-20	DOWN	NA	NA	NA	NA	NA	NA	NA	NA	NA	NA	NA
	TRINITY_DN29898_c2_g1	-10.7973	3.95e-10	1.21e-08	DOWN	TRINITY_DN29898_c2_g1	TraesCS2A01G558200.1	775	957	993	6.93e-57	TraesCS2A01G558200	chr2A	761541240	761542684	Chitinase
	TRINITY_DN17219_c0_g1	-10.7971	2.69e-14	1.57e-12	DOWN	TRINITY_DN17219_c0_g1	TraesCS3B01G084100.1	3691	4301	4854	1.02e-91	TraesCS3B01G084100	chr3B	52916303	52923604	NBS-LRR disease resistance protein-like protein
	TRINITY_DN24025_c0_g1	-10.7869	9.91e-22	1.69e-19	DOWN	TRINITY_DN24025_c0_g1	TraesCS5A01G097100.1	1026	1256	2094	1.67e-94	TraesCS5A01G097100	chr5A	137276077	137279207	Protein VERNALIZATION INSENSITIVE 3
	TRINITY_DN26399_c3_g1	-10.7836	1.27e-22	2.51e-20	DOWN	NA	NA	NA	NA	NA	NA	NA	NA	NA	NA	NA
	TRINITY_DN19676_c1_g1	-10.7803	3.19e-23	6.93e-21	DOWN	NA	NA	NA	NA	NA	NA	NA	NA	NA	NA	NA
	TRINITY_DN72770_c0_g2	-10.779	5.5e-20	7.28e-18	DOWN	TRINITY_DN72770_c0_g2	TraesCS3B01G100700.1	367	439	1065	3.33e-23	TraesCS3B01G100700	chr3B	66953760	66957963	bZIP transcription factor, putative (DUF1664)
	TRINITY_DN48513_c0_g2	-10.7726	3.06e-23	6.67e-21	DOWN	NA	NA	NA	NA	NA	NA	NA	NA	NA	NA	NA
	TRINITY_DN23861_c0_g1	-10.7696	1.63e-22	3.15e-20	DOWN	NA	NA	NA	NA	NA	NA	NA	NA	NA	NA	NA
	TRINITY_DN15579_c1_g2	-10.7682	2.44e-23	5.4e-21	DOWN	TRINITY_DN15579_c1_g2	TraesCS7A01G047500.1	1	563	906	0	TraesCS7A01G047500	chr7A	21514000	21514905	Segregation and condensation protein A
	TRINITY_DN17939_c0_g1	-10.7674	1.75e-18	1.88e-16	DOWN	NA	NA	NA	NA	NA	NA	NA	NA	NA	NA	NA
	TRINITY_DN45126_c0_g1	-10.7666	4.59e-23	9.78e-21	DOWN	NA	NA	NA	NA	NA	NA	NA	NA	NA	NA	NA
	TRINITY_DN69377_c0_g1	-10.7649	8.12e-20	1.05e-17	DOWN	NA	NA	NA	NA	NA	NA	NA	NA	NA	NA	NA
	TRINITY_DN21940_c0_g1	-10.7588	5.74e-19	6.59e-17	DOWN	TRINITY_DN21940_c0_g1	TraesCS2A01G560400.1	2004	2202	2202	1.05e-62	TraesCS2A01G560400	chr2A	762640287	762644579	Pentatricopeptide repeat-containing family protein
	TRINITY_DN31975_c0_g1	-10.7563	1.78e-20	2.56e-18	DOWN	TRINITY_DN31975_c0_g1	TraesCS2D01G097200.1	1595	1767	1767	3.03e-73	TraesCS2D01G097200	chr2D	49616084	49619184	Guanine nucleotide-binding protein-like 3-like protein
	TRINITY_DN16108_c0_g4	-10.7559	4.16e-23	8.91e-21	DOWN	NA	NA	NA	NA	NA	NA	NA	NA	NA	NA	NA
	TRINITY_DN219401_c0_g1	-10.7492	1.4e-21	2.34e-19	DOWN	TRINITY_DN219401_c0_g1	TraesCS7D01G464500.1	1434	1396	1434	8.12e-10	TraesCS7D01G464500	chr7D	579048886	579051227	FBD-associated F-box protein
	TRINITY_DN224_c2_g1	-10.7352	1.54e-21	2.56e-19	DOWN	NA	NA	NA	NA	NA	NA	NA	NA	NA	NA	NA
	TRINITY_DN43277_c0_g2	-10.7343	4.16e-23	8.91e-21	DOWN	TRINITY_DN43277_c0_g2	TraesCS7D01G011800.1	1397	1716	1716	6.46e-130	TraesCS7D01G011800	chr7D	5179420	5185825	Receptor-like protein kinase
	TRINITY_DN23112_c0_g1	-10.7343	7.85e-23	1.6e-20	DOWN	NA	NA	NA	NA	NA	NA	NA	NA	NA	NA	NA
	TRINITY_DN18680_c0_g1	-10.7259	1.62e-17	1.54e-15	DOWN	TRINITY_DN18680_c0_g1	TraesCS7A01G417000.1	2568	2921	2961	9.82e-159	TraesCS7A01G417000	chr7A	608726041	608734165	Galactokinase
	TRINITY_DN56642_c0_g2	-10.7196	1.69e-14	1.02e-12	DOWN	NA	NA	NA	NA	NA	NA	NA	NA	NA	NA	NA
	TRINITY_DN28740_c0_g1	-10.719	8.12e-23	1.65e-20	DOWN	TRINITY_DN28740_c0_g1	TraesCS7A01G040100.1	456	729	729	1.1e-132	TraesCS7A01G040100	chr7A	18101646	18103326	HAT transposon superfamily
	TRINITY_DN22097_c0_g2	-10.7174	1.74e-22	3.31e-20	DOWN	TRINITY_DN22097_c0_g2	TraesCS3B01G256900.1	1	277	855	1.66e-142	TraesCS3B01G256900	chr3B	414210405	414213374	RING finger protein
	TRINITY_DN28756_c1_g2	-10.7174	3.16e-19	3.75e-17	DOWN	TRINITY_DN28756_c1_g2	TraesCS1A01G173900.1	113	62	744	3.11e-10	TraesCS1A01G173900	chr1A	309910012	309913118	Diacylglycerol O-acyltransferase 2
	TRINITY_DN79270_c0_g1	-10.7125	6.1e-23	1.27e-20	DOWN	TRINITY_DN79270_c0_g1	TraesCS5A01G107100.1	68	253	288	6.35e-76	TraesCS5A01G107100	chr5A	180347402	180347689	kinesin 3
	TRINITY_DN28693_c0_g2	-10.7121	6.11e-23	1.27e-20	DOWN	TRINITY_DN28693_c0_g2	TraesCS1A01G026400.1	2427	2205	2610	2.02e-94	TraesCS1A01G026400	chr1A	12586749	12590845	Disease resistance protein (NBS-LRR class) family
	TRINITY_DN155855_c0_g1	-10.7118	1.24e-22	2.47e-20	DOWN	NA	NA	NA	NA	NA	NA	NA	NA	NA	NA	NA
	TRINITY_DN20362_c0_g1	-10.7106	7.21e-23	1.48e-20	DOWN	TRINITY_DN20362_c0_g1	TraesCS4A01G492700.1	539	581	675	1.97e-08	TraesCS4A01G492700	chr4A	741588190	741588864	Glutaredoxin family protein, expressed
	TRINITY_DN7659_c0_g2	-10.7058	1.75e-06	2.96e-05	DOWN	TRINITY_DN7659_c0_g2	TraesCS6D01G373800.1	888	1098	1098	6.96e-95	TraesCS6D01G373800	chr6D	458507100	458508808	O-methyltransferase
	TRINITY_DN36474_c1_g1	-10.704	1.72e-22	3.29e-20	DOWN	TRINITY_DN36474_c1_g1	TraesCS7B01G481800.1	1562	1843	2190	3.63e-147	TraesCS7B01G481800	chr7B	739382658	739386654	Chloroplastic group IIA intron splicing facilitator CRS1, chloroplastic
	TRINITY_DN51152_c0_g2	-10.7033	2.35e-22	4.41e-20	DOWN	NA	NA	NA	NA	NA	NA	NA	NA	NA	NA	NA
	TRINITY_DN852_c1_g1	-10.7025	2.82e-21	4.53e-19	DOWN	NA	NA	NA	NA	NA	NA	NA	NA	NA	NA	NA
	TRINITY_DN20918_c0_g1	-10.702	7.61e-23	1.56e-20	DOWN	NA	NA	NA	NA	NA	NA	NA	NA	NA	NA	NA
	TRINITY_DN47907_c0_g1	-10.6957	3.03e-22	5.61e-20	DOWN	NA	NA	NA	NA	NA	NA	NA	NA	NA	NA	NA
	TRINITY_DN43051_c0_g2	-10.6892	4.99e-07	9.43e-06	DOWN	NA	NA	NA	NA	NA	NA	NA	NA	NA	NA	NA
	TRINITY_DN88300_c0_g2	-10.6879	1.07e-22	2.13e-20	DOWN	NA	NA	NA	NA	NA	NA	NA	NA	NA	NA	NA
	TRINITY_DN20544_c0_g1	-10.6876	3.26e-17	2.94e-15	DOWN	TRINITY_DN20544_c0_g1	TraesCS5D01G033700.1	1	78	615	4.9e-32	TraesCS5D01G033700	chr5D	32298091	32303148	YABBY transcription factor
	TRINITY_DN15209_c1_g1	-10.6875	1.03e-22	2.06e-20	DOWN	TRINITY_DN15209_c1_g1	TraesCS7A01G419900.1	1023	1113	1113	2.94e-37	TraesCS7A01G419900	chr7A	611488421	611494157	Core-2/I-branching beta-1,6-N-acetylglucosaminyltransferase family protein
	TRINITY_DN25276_c0_g1	-10.6875	1.03e-22	2.06e-20	DOWN	NA	NA	NA	NA	NA	NA	NA	NA	NA	NA	NA
	TRINITY_DN211061_c0_g1	-10.6841	3.78e-21	5.94e-19	DOWN	NA	NA	NA	NA	NA	NA	NA	NA	NA	NA	NA
	TRINITY_DN16598_c0_g1	-10.6778	2.07e-21	3.38e-19	DOWN	TRINITY_DN16598_c0_g1	TraesCS1A01G065000.1	898	944	1020	2.15e-09	TraesCS1A01G065000	chr1A	47209815	47211960	Importin subunit beta-1
	TRINITY_DN40059_c0_g1	-10.6714	2.4e-22	4.48e-20	DOWN	TRINITY_DN40059_c0_g1	TraesCS2B01G628600.1	872	1090	1407	2.88e-112	TraesCS2B01G628600	chr2B	800029664	800035949	Zinc finger protein ZPR1
	TRINITY_DN14149_c0_g2	-10.6663	4.23e-20	5.68e-18	DOWN	TRINITY_DN14149_c0_g2	TraesCS7B01G319900.1	1444	1775	1887	1.59e-131	TraesCS7B01G319900	chr7B	569945601	569952446	UDP-sugar pyrophosphorylase
	TRINITY_DN59383_c0_g1	-10.6663	4.27e-22	7.71e-20	DOWN	NA	NA	NA	NA	NA	NA	NA	NA	NA	NA	NA
	TRINITY_DN39184_c0_g1	-10.6662	1.05e-15	7.67e-14	DOWN	TRINITY_DN39184_c0_g1	TraesCS2D01G487100.1	13	76	273	1.85e-19	TraesCS2D01G487100	chr2D	587111339	587112102	Wound-responsive family protein
	TRINITY_DN46768_c0_g1	-10.6625	1.08e-14	6.69e-13	DOWN	TRINITY_DN46768_c0_g1	TraesCS7D01G373500.1	29	270	1443	5.51e-105	TraesCS7D01G373500	chr7D	483928804	483931598	Aspartic proteinase
	TRINITY_DN40460_c0_g1	-10.6617	3e-17	2.72e-15	DOWN	TRINITY_DN40460_c0_g1	TraesCS2B01G038200.1	4331	4383	4383	5.39e-20	TraesCS2B01G038200	chr2B	17779264	17795470	Glycine-rich protein
	TRINITY_DN44492_c0_g1	-10.6593	6.13e-13	2.89e-11	DOWN	TRINITY_DN44492_c0_g1	TraesCS2A01G017100.1	288	500	1227	6.04e-109	TraesCS2A01G017100	chr2A	7919298	7921741	NADH-quinone oxidoreductase subunit F
	TRINITY_DN6130_c2_g1	-10.659	1.74e-22	3.31e-20	DOWN	TRINITY_DN6130_c2_g1	TraesCS2A01G012200.1	397	618	3111	6.32e-114	TraesCS2A01G012200	chr2A	4786628	4793590	Protein transport Sec24-like protein
	TRINITY_DN34601_c0_g1	-10.6571	1.09e-20	1.61e-18	DOWN	TRINITY_DN34601_c0_g1	TraesCS7D01G381400.1	882	1119	1119	2.1e-94	TraesCS7D01G381400	chr7D	495692673	495697650	ATP-dependent zinc metalloprotease FtsH
	TRINITY_DN11291_c0_g2	-10.6485	1.79e-11	6.71e-10	DOWN	TRINITY_DN11291_c0_g2	TraesCS1D01G011400.1	1839	1913	2895	1.52e-20	TraesCS1D01G011400	chr1D	6264619	6268342	Leucine-rich repeat receptor-like protein kinase family
	TRINITY_DN37032_c0_g1	-10.6484	1.88e-10	6.06e-09	DOWN	TRINITY_DN37032_c0_g1	TraesCS7B01G446000.1	338	390	390	3.68e-13	TraesCS7B01G446000	chr7B	709468338	709469074	Chaperone protein dnaJ
	TRINITY_DN4357_c1_g1	-10.6419	3.98e-21	6.25e-19	DOWN	NA	NA	NA	NA	NA	NA	NA	NA	NA	NA	NA
	TRINITY_DN20988_c0_g1	-10.6361	4.8e-21	7.46e-19	DOWN	TRINITY_DN20988_c0_g1	TraesCS2D01G512100.1	720	975	1002	9.61e-108	TraesCS2D01G512100	chr2D	603541123	603543385	Isoaspartyl peptidase/L-asparaginase
	TRINITY_DN12441_c0_g2	-10.6337	9.6e-06	0.000135924	DOWN	NA	NA	NA	NA	NA	NA	NA	NA	NA	NA	NA
	TRINITY_DN28590_c0_g1	-10.6253	3.23e-22	5.94e-20	DOWN	NA	NA	NA	NA	NA	NA	NA	NA	NA	NA	NA
	TRINITY_DN22600_c0_g1	-10.6248	2.4e-20	3.35e-18	DOWN	TRINITY_DN22600_c0_g1	TraesCS6A01G396200.1	1	198	1074	1.51e-44	TraesCS6A01G396200	chr6A	608505176	608508548	Ankyrin repeat family protein
	TRINITY_DN22491_c1_g2	-10.6224	3.53e-22	6.44e-20	DOWN	TRINITY_DN22491_c1_g2	TraesCS7B01G366600.1	313	460	471	3.63e-59	TraesCS7B01G366600	chr7B	630310696	630311406	Polyubiquitin
	TRINITY_DN99506_c0_g1	-10.6221	1.26e-17	1.21e-15	DOWN	NA	NA	NA	NA	NA	NA	NA	NA	NA	NA	NA
	TRINITY_DN18668_c1_g1	-10.6215	3.32e-21	5.29e-19	DOWN	NA	NA	NA	NA	NA	NA	NA	NA	NA	NA	NA
	TRINITY_DN48684_c0_g1	-10.6181	3.67e-20	4.98e-18	DOWN	TRINITY_DN48684_c0_g1	TraesCS6A01G339400.1	1429	1647	2352	2.92e-102	TraesCS6A01G339400	chr6A	572572026	572574377	Subtilisin protease
	TRINITY_DN48678_c0_g1	-10.613	4.11e-22	7.46e-20	DOWN	TRINITY_DN48678_c0_g1	TraesCS1B01G051400.1	1112	1255	1554	6.82e-64	TraesCS1B01G051400	chr1B	31372728	31376658	Transposon protein, putative, CACTA, En/Spm sub-class
	TRINITY_DN18823_c0_g1	-10.6097	4.28e-22	7.72e-20	DOWN	NA	NA	NA	NA	NA	NA	NA	NA	NA	NA	NA
	TRINITY_DN49924_c2_g1	-10.6094	6e-21	9.19e-19	DOWN	TRINITY_DN49924_c2_g1	TraesCS3B01G054700.1	733	984	984	1.57e-103	TraesCS3B01G054700	chr3B	28363801	28364784	Receptor-like kinase
	TRINITY_DN5044_c0_g2	-10.6054	7.36e-22	1.29e-19	DOWN	TRINITY_DN5044_c0_g2	TraesCS6A01G321200.1	1823	1909	2922	1.17e-28	TraesCS6A01G321200	chr6A	555723204	555732132	DNA repair/recombination protein
	TRINITY_DN60477_c0_g1	-10.6045	4.46e-14	2.5e-12	DOWN	TRINITY_DN60477_c0_g1	TraesCS7B01G232500.1	405	466	471	6.36e-25	TraesCS7B01G232500	chr7B	435791472	435792305	CASP-like protein
	TRINITY_DN252962_c0_g1	-10.6026	1.18e-15	8.54e-14	DOWN	NA	NA	NA	NA	NA	NA	NA	NA	NA	NA	NA
	TRINITY_DN8045_c4_g1	-10.6023	1.99e-14	1.18e-12	DOWN	NA	NA	NA	NA	NA	NA	NA	NA	NA	NA	NA
	TRINITY_DN10020_c0_g1	-10.599	3.85e-11	1.38e-09	DOWN	TRINITY_DN10020_c0_g1	TraesCS6D01G206200.1	1	1278	1278	0	TraesCS6D01G206200	chr6D	291959163	291960440	Leucine-rich repeat protein kinase family protein
	TRINITY_DN23745_c0_g1	-10.5989	3.46e-21	5.49e-19	DOWN	TRINITY_DN23745_c0_g1	TraesCS7A01G498300.1	342	1181	1188	0	TraesCS7A01G498300	chr7A	688828950	688830675	WRKY DNA-binding protein 39
	TRINITY_DN23074_c0_g1	-10.5989	6.48e-07	1.2e-05	DOWN	NA	NA	NA	NA	NA	NA	NA	NA	NA	NA	NA
	TRINITY_DN25795_c1_g1	-10.5989	7.74e-22	1.35e-19	DOWN	TRINITY_DN25795_c1_g1	TraesCS6D01G390600.1	1540	1656	1656	9.35e-43	TraesCS6D01G390600	chr6D	465742668	465745084	F-box family protein
	TRINITY_DN31207_c0_g1	-10.5976	5.34e-22	9.57e-20	DOWN	NA	NA	NA	NA	NA	NA	NA	NA	NA	NA	NA
	TRINITY_DN8658_c0_g2	-10.5965	1.47e-20	2.15e-18	DOWN	TRINITY_DN8658_c0_g2	TraesCS5A01G408200.1	483	576	630	1.52e-16	TraesCS5A01G408200	chr5A	598632827	598634515	Villin-4
	TRINITY_DN24986_c0_g1	-10.59	6.08e-22	1.08e-19	DOWN	TRINITY_DN24986_c0_g1	TraesCS6A01G089000.1	452	548	1002	1.58e-27	TraesCS6A01G089000	chr6A	57680902	57684078	Ribosome biogenesis regulatory protein-like protein
	TRINITY_DN28446_c0_g1	-10.5899	5.88e-21	9.03e-19	DOWN	TRINITY_DN28446_c0_g1	TraesCS7B01G360400.1	192	498	747	2.45e-134	TraesCS7B01G360400	chr7B	622670263	622672532	Tetraspanin family protein, putative
	TRINITY_DN10896_c0_g1	-10.5859	1.32e-21	2.2e-19	DOWN	TRINITY_DN10896_c0_g1	TraesCS7A01G374000.1	1111	1219	2124	7.28e-36	TraesCS7A01G374000	chr7A	547082226	547088229	ATP dependent RNA helicase
	TRINITY_DN16748_c0_g4	-10.5821	1.33e-21	2.22e-19	DOWN	TRINITY_DN16748_c0_g4	TraesCS3A01G179100.1	375	301	417	6.79e-10	TraesCS3A01G179100	chr3A	205689861	205690277	HECT ubiquitin protein ligase family protein KAK
	TRINITY_DN84137_c0_g1	-10.5812	7.63e-22	1.34e-19	DOWN	TRINITY_DN84137_c0_g1	TraesCSU01G213900.1	155	321	459	6.69e-68	TraesCSU01G213900	chrUn	317207397	317207855	Polyubiquitin family protein
	TRINITY_DN23967_c0_g1	-10.5745	4.31e-14	2.42e-12	DOWN	TRINITY_DN23967_c0_g1	TraesCSU01G165000.1	1311	1809	1809	2.75e-177	TraesCSU01G165000	chrUn	239738015	239739823	Arginine decarboxylase
	TRINITY_DN18653_c1_g1	-10.5743	2.77e-14	1.61e-12	DOWN	NA	NA	NA	NA	NA	NA	NA	NA	NA	NA	NA
	TRINITY_DN20638_c0_g1	-10.5733	1.29e-09	3.66e-08	DOWN	TRINITY_DN20638_c0_g1	TraesCS2D01G029800.1	1422	1452	1452	1.03e-07	TraesCS2D01G029800	chr2D	12294939	12296630	Glycosyltransferase
	TRINITY_DN192289_c0_g1	-10.5715	4.5e-21	7.02e-19	DOWN	TRINITY_DN192289_c0_g1	TraesCS4B01G311100.1	1	71	1572	5.01e-28	TraesCS4B01G311100	chr4B	601195048	601198424	Pheophorbide a oxygenase, chloroplastic
	TRINITY_DN31347_c0_g1	-10.5713	1.96e-20	2.8e-18	DOWN	NA	NA	NA	NA	NA	NA	NA	NA	NA	NA	NA
	TRINITY_DN44498_c0_g1	-10.571	8.93e-22	1.55e-19	DOWN	NA	NA	NA	NA	NA	NA	NA	NA	NA	NA	NA
	TRINITY_DN36986_c0_g1	-10.5689	2.55e-21	4.12e-19	DOWN	NA	NA	NA	NA	NA	NA	NA	NA	NA	NA	NA
	TRINITY_DN25365_c0_g2	-10.568	1.08e-21	1.83e-19	DOWN	TRINITY_DN25365_c0_g2	TraesCS6B01G339400.1	306	444	6090	7.21e-37	TraesCS6B01G339400	chr6B	599049689	599071393	Nuclear-pore anchor
	TRINITY_DN49235_c1_g1	-10.5667	3.06e-15	2.05e-13	DOWN	TRINITY_DN49235_c1_g1	TraesCS1B01G012000.1	2842	3054	4260	6.04e-109	TraesCS1B01G012000	chr1B	5851590	5856116	Pm3-like disease resistance protein
	TRINITY_DN56087_c0_g1	-10.5632	2.16e-16	1.74e-14	DOWN	NA	NA	NA	NA	NA	NA	NA	NA	NA	NA	NA
	TRINITY_DN40710_c0_g1	-10.5621	1.92e-21	3.14e-19	DOWN	TRINITY_DN40710_c0_g1	TraesCS3D01G001900.1	1041	1110	1110	2.91e-29	TraesCS3D01G001900	chr3D	866382	870469	U-box domain-containing protein
	TRINITY_DN40957_c0_g1	-10.5607	1.43e-21	2.38e-19	DOWN	TRINITY_DN40957_c0_g1	TraesCS7D01G039600.2	700	780	780	4.44e-27	TraesCS7D01G039600	chr7D	20238500	20240291	Haloacid dehalogenase-like hydrolase domain-containing protein 3
	TRINITY_DN25494_c0_g1	-10.5604	4.91e-19	5.68e-17	DOWN	TRINITY_DN25494_c0_g1	TraesCS2B01G550500.1	1160	1266	1269	5.64e-43	TraesCS2B01G550500	chr2B	746172440	746176043	RNA-binding protein Nova
	TRINITY_DN121382_c0_g1	-10.5548	1.69e-21	2.78e-19	DOWN	TRINITY_DN121382_c0_g1	TraesCS4A01G377500.2	1	516	516	0	TraesCS4A01G377500	chr4A	652849610	652857706	Ras GTPase-activating protein-binding protein 1
	TRINITY_DN24691_c0_g1	-10.5518	5.05e-21	7.82e-19	DOWN	TRINITY_DN24691_c0_g1	TraesCS7A01G451100.1	780	885	885	5.05e-46	TraesCS7A01G451100	chr7A	644461057	644463200	Phosphosulfolactate synthase-related protein
	TRINITY_DN38660_c0_g1	-10.5491	1.11e-10	3.7e-09	DOWN	TRINITY_DN38660_c0_g1	TraesCS4A01G384000.1	1	220	339	3.14e-44	TraesCS4A01G384000	chr4A	661827403	661827741	NHL domain-containing protein, putative
	TRINITY_DN18309_c0_g1	-10.5462	3.08e-18	3.22e-16	DOWN	NA	NA	NA	NA	NA	NA	NA	NA	NA	NA	NA
	TRINITY_DN21422_c0_g1	-10.5446	1.13e-19	1.43e-17	DOWN	NA	NA	NA	NA	NA	NA	NA	NA	NA	NA	NA
	TRINITY_DN16627_c0_g1	-10.5427	7.73e-12	3.08e-10	DOWN	TRINITY_DN16627_c0_g1	TraesCS2A01G571600.1	515	984	984	0	TraesCS2A01G571600	chr2A	768315198	768316809	Peroxidase
	TRINITY_DN70624_c0_g1	-10.5418	1.05e-16	8.89e-15	DOWN	NA	NA	NA	NA	NA	NA	NA	NA	NA	NA	NA
	TRINITY_DN20237_c0_g1	-10.5399	7.75e-21	1.17e-18	DOWN	TRINITY_DN20237_c0_g1	TraesCS7B01G482000.1	1	68	1275	5.4e-28	TraesCS7B01G482000	chr7B	739442503	739445446	Phytoene synthase
	TRINITY_DN11725_c1_g2	-10.5394	1.09e-18	1.2e-16	DOWN	NA	NA	NA	NA	NA	NA	NA	NA	NA	NA	NA
	TRINITY_DN20543_c1_g3	-10.5391	1.79e-21	2.94e-19	DOWN	TRINITY_DN20543_c1_g3	TraesCS7D01G550900.1	3107	3315	3315	6.96e-73	TraesCS7D01G550900	chr7D	634691966	634696889	DUF789 family protein
	TRINITY_DN105357_c3_g1	-10.539	5.1e-16	3.87e-14	DOWN	TRINITY_DN105357_c3_g1	TraesCS3B01G472400.1	2693	3066	4314	1.77e-146	TraesCS3B01G472400	chr3B	720987028	720992456	Disease resistance protein RPM1
	TRINITY_DN57460_c0_g1	-10.5362	6.46e-13	3.03e-11	DOWN	TRINITY_DN57460_c0_g1	TraesCS3B01G013300.1	1	58	1185	9.99e-23	TraesCS3B01G013300	chr3B	5953206	5955049	TPX2 (Targeting protein for Xklp2) family protein
	TRINITY_DN14681_c4_g1	-10.5341	8.14e-13	3.77e-11	DOWN	NA	NA	NA	NA	NA	NA	NA	NA	NA	NA	NA
	TRINITY_DN21222_c1_g1	-10.5312	2.2e-21	3.57e-19	DOWN	NA	NA	NA	NA	NA	NA	NA	NA	NA	NA	NA
	TRINITY_DN39277_c0_g1	-10.5312	2.2e-21	3.57e-19	DOWN	NA	NA	NA	NA	NA	NA	NA	NA	NA	NA	NA
	TRINITY_DN54848_c0_g1	-10.5303	4.42e-11	1.56e-09	DOWN	TRINITY_DN54848_c0_g1	TraesCS4A01G469500.1	244	1362	1362	0	TraesCS4A01G469500	chr4A	731237935	731239296	Aspartic proteinase nepenthesin-1
	TRINITY_DN23882_c0_g4	-10.5299	3.47e-11	1.25e-09	DOWN	NA	NA	NA	NA	NA	NA	NA	NA	NA	NA	NA
	TRINITY_DN14421_c0_g1	-10.5245	1.97e-20	2.81e-18	DOWN	NA	NA	NA	NA	NA	NA	NA	NA	NA	NA	NA
	TRINITY_DN52617_c1_g1	-10.5233	1.72e-14	1.03e-12	DOWN	NA	NA	NA	NA	NA	NA	NA	NA	NA	NA	NA
	TRINITY_DN54841_c0_g1	-10.5204	3.28e-20	4.49e-18	DOWN	NA	NA	NA	NA	NA	NA	NA	NA	NA	NA	NA
	TRINITY_DN63636_c0_g1	-10.5193	3.06e-21	4.9e-19	DOWN	TRINITY_DN63636_c0_g1	TraesCS5D01G044300.1	713	2038	3855	4.85e-165	TraesCS5D01G044300	chr5D	43316281	43320236	NBS-LRR-like resistance protein
	TRINITY_DN60281_c1_g1	-10.5179	6.16e-20	8.1e-18	DOWN	TRINITY_DN60281_c1_g1	TraesCS2A01G531500.1	1	94	273	4.69e-31	TraesCS2A01G531500	chr2A	748542328	748542600	Wound-responsive family protein
	TRINITY_DN26084_c0_g1	-10.5139	8.6e-21	1.29e-18	DOWN	TRINITY_DN26084_c0_g1	TraesCS5A01G107100.1	6	77	288	1.52e-26	TraesCS5A01G107100	chr5A	180347402	180347689	kinesin 3
	TRINITY_DN94715_c0_g1	-10.5119	4.28e-11	1.52e-09	DOWN	NA	NA	NA	NA	NA	NA	NA	NA	NA	NA	NA
	TRINITY_DN131770_c0_g1	-10.5111	1.19e-18	1.3e-16	DOWN	NA	NA	NA	NA	NA	NA	NA	NA	NA	NA	NA
	TRINITY_DN240436_c0_g1	-10.5067	1.03e-12	4.72e-11	DOWN	NA	NA	NA	NA	NA	NA	NA	NA	NA	NA	NA
	TRINITY_DN29626_c0_g1	-10.5056	1.63e-10	5.31e-09	DOWN	NA	NA	NA	NA	NA	NA	NA	NA	NA	NA	NA
	TRINITY_DN133821_c0_g1	-10.5037	5.4e-21	8.34e-19	DOWN	NA	NA	NA	NA	NA	NA	NA	NA	NA	NA	NA
	TRINITY_DN78952_c0_g1	-10.5012	2.83e-15	1.91e-13	DOWN	TRINITY_DN78952_c0_g1	TraesCS7B01G441100.1	1234	1501	1578	2.19e-104	TraesCS7B01G441100	chr7B	706159905	706161939	Cytochrome P450
	TRINITY_DN16111_c0_g7	-10.4985	3.51e-21	5.55e-19	DOWN	NA	NA	NA	NA	NA	NA	NA	NA	NA	NA	NA
	TRINITY_DN40094_c0_g2	-10.4928	2.09e-20	2.97e-18	DOWN	TRINITY_DN40094_c0_g2	TraesCS3D01G513700.1	355	557	1578	3.2e-58	TraesCS3D01G513700	chr3D	597616763	597620277	CBS domain-containing protein-like
	TRINITY_DN45566_c1_g1	-10.488	9.22e-20	1.18e-17	DOWN	NA	NA	NA	NA	NA	NA	NA	NA	NA	NA	NA
	TRINITY_DN37542_c0_g2	-10.4873	3.31e-07	6.47e-06	DOWN	TRINITY_DN37542_c0_g2	TraesCS2A01G062200.1	1	172	636	1.12e-67	TraesCS2A01G062200	chr2A	27642899	27643874	Proline-rich protein, putative, expressed
	TRINITY_DN33437_c0_g1	-10.4841	5.65e-21	8.71e-19	DOWN	TRINITY_DN33437_c0_g1	TraesCS7A01G504900.2	67	302	903	1.61e-101	TraesCS7A01G504900	chr7A	692905529	692907941	Photosystem II reaction center PsbP family protein
	TRINITY_DN925_c2_g2	-10.4762	2.21e-20	3.11e-18	DOWN	NA	NA	NA	NA	NA	NA	NA	NA	NA	NA	NA
	TRINITY_DN26788_c0_g2	-10.4759	3.82e-15	2.52e-13	DOWN	TRINITY_DN26788_c0_g2	TraesCS1B01G041200.1	1	87	993	1.43e-35	TraesCS1B01G041200	chr1B	20585363	20588102	F-box protein-like
	TRINITY_DN52558_c0_g1	-10.4744	8.22e-20	1.06e-17	DOWN	TRINITY_DN52558_c0_g1	TraesCS6A01G037800.1	1728	1761	1761	2.47e-09	TraesCS6A01G037800	chr6A	18705010	18708190	RNA-binding NOB1
	TRINITY_DN2527_c1_g1	-10.471	3.85e-11	1.38e-09	DOWN	TRINITY_DN2527_c1_g1	TraesCS2D01G177500.1	1053	1126	1800	6.92e-20	TraesCS2D01G177500	chr2D	120998769	121005247	Inter-alpha-trypsin inhibitor heavy chain-like protein
	TRINITY_DN47216_c0_g1	-10.4689	4.86e-20	6.51e-18	DOWN	TRINITY_DN47216_c0_g1	TraesCS7A01G412400.1	1116	1173	1173	2.96e-19	TraesCS7A01G412400	chr7A	603291733	603294860	12-oxophytodienoate reductase
	TRINITY_DN201279_c0_g1	-10.4681	6.09e-14	3.33e-12	DOWN	NA	NA	NA	NA	NA	NA	NA	NA	NA	NA	NA
	TRINITY_DN16748_c0_g5	-10.4667	6.33e-21	9.67e-19	DOWN	NA	NA	NA	NA	NA	NA	NA	NA	NA	NA	NA
	TRINITY_DN108236_c0_g1	-10.4614	6.88e-16	5.14e-14	DOWN	NA	NA	NA	NA	NA	NA	NA	NA	NA	NA	NA
	TRINITY_DN49840_c0_g1	-10.4597	5.66e-19	6.51e-17	DOWN	NA	NA	NA	NA	NA	NA	NA	NA	NA	NA	NA
	TRINITY_DN17964_c0_g2	-10.4583	4.53e-09	1.18e-07	DOWN	TRINITY_DN17964_c0_g2	TraesCS3A01G013700.1	78	1485	1488	0	TraesCS3A01G013700	chr3A	9843686	9846483	O-acyltransferase WSD1
	TRINITY_DN3156_c3_g1	-10.4503	1.82e-16	1.49e-14	DOWN	NA	NA	NA	NA	NA	NA	NA	NA	NA	NA	NA
	TRINITY_DN23647_c0_g3	-10.4434	1.34e-19	1.68e-17	DOWN	TRINITY_DN23647_c0_g3	TraesCS6B01G061900.1	833	1266	1677	0	TraesCS6B01G061900	chr6B	41435196	41437033	Dead box ATP-dependent RNA helicase, putative
	TRINITY_DN72680_c0_g1	-10.4432	4.17e-14	2.35e-12	DOWN	TRINITY_DN72680_c0_g1	TraesCS7A01G019400.1	962	1299	1566	1.58e-146	TraesCS7A01G019400	chr7A	7937175	7938849	Pectin lyase-like superfamily protein
	TRINITY_DN28564_c0_g1	-10.4421	1.77e-12	7.8e-11	DOWN	TRINITY_DN28564_c0_g1	TraesCSU01G007800.1	1176	1404	1515	8.36e-118	TraesCSU01G007800	chrUn	11739970	11748040	Protein DA1-related 1
	TRINITY_DN51480_c0_g1	-10.4375	1.35e-20	1.98e-18	DOWN	TRINITY_DN51480_c0_g1	TraesCS7A01G540000.1	3856	3909	3909	1.52e-20	TraesCS7A01G540000	chr7A	717080943	717092746	Mediator of rna polymerase ii transcription subunit 15a
	TRINITY_DN3722_c2_g1	-10.4371	1.24e-20	1.83e-18	DOWN	TRINITY_DN3722_c2_g1	TraesCS6A01G016200.1	1	65	552	3.33e-26	TraesCS6A01G016200	chr6A	7997230	8002679	Ubiquitin-conjugating enzyme E2, putative
	TRINITY_DN21455_c0_g2	-10.4368	3.11e-16	2.44e-14	DOWN	TRINITY_DN21455_c0_g2	TraesCSU01G064400.1	2374	2616	2853	1.63e-95	TraesCSU01G064400	chrUn	50622207	50625286	NBS-LRR disease resistance protein-like protein
	TRINITY_DN35965_c0_g1	-10.4354	9.66e-20	1.24e-17	DOWN	TRINITY_DN35965_c0_g1	TraesCS7A01G402500.1	311	363	1203	1.26e-19	TraesCS7A01G402500	chr7A	581845057	581848708	Ribose-phosphate pyrophosphokinase
	TRINITY_DN14859_c1_g3	-10.4322	1.5e-17	1.43e-15	DOWN	NA	NA	NA	NA	NA	NA	NA	NA	NA	NA	NA
	TRINITY_DN29687_c0_g2	-10.4311	2.41e-14	1.42e-12	DOWN	TRINITY_DN29687_c0_g2	TraesCS6A01G044600.1	761	977	1161	8.1e-98	TraesCS6A01G044600	chr6A	23355685	23358223	Loricrin-like
	TRINITY_DN201549_c0_g1	-10.4279	5.81e-20	7.67e-18	DOWN	NA	NA	NA	NA	NA	NA	NA	NA	NA	NA	NA
	TRINITY_DN12360_c0_g1	-10.4226	1.34e-20	1.97e-18	DOWN	TRINITY_DN12360_c0_g1	TraesCS3B01G012000.1	218	381	381	3.52e-50	TraesCS3B01G012000	chr3B	5406106	5406486	Misshapen-like kinase 1
	TRINITY_DN61938_c0_g1	-10.4223	1.12e-19	1.42e-17	DOWN	NA	NA	NA	NA	NA	NA	NA	NA	NA	NA	NA
	TRINITY_DN26318_c1_g1	-10.4222	2.02e-20	2.86e-18	DOWN	NA	NA	NA	NA	NA	NA	NA	NA	NA	NA	NA
	TRINITY_DN29208_c1_g1	-10.4189	1.69e-20	2.44e-18	DOWN	TRINITY_DN29208_c1_g1	TraesCS3A01G115700.1	533	660	738	3.08e-49	TraesCS3A01G115700	chr3A	83690873	83693853	UDP-D-apiose/UDP-D-xylose synthase 2
	TRINITY_DN31693_c1_g2	-10.4188	1.56e-20	2.27e-18	DOWN	TRINITY_DN31693_c1_g2	TraesCS6B01G437200.1	938	1295	1497	0	TraesCS6B01G437200	chr6B	704371677	704374366	FBD-associated F-box protein
	TRINITY_DN8724_c2_g1	-10.412	1.98e-19	2.41e-17	DOWN	TRINITY_DN8724_c2_g1	TraesCS6D01G381400.1	1	169	1431	6.22e-79	TraesCS6D01G381400	chr6D	461854537	461856190	F-box/RNI-like/FBD-like domains-containing protein
	TRINITY_DN17412_c0_g1	-10.4085	1.66e-19	2.05e-17	DOWN	TRINITY_DN17412_c0_g1	TraesCS2B01G625300.1	1131	1553	1584	0	TraesCS2B01G625300	chr2B	798134845	798139344	E3 ubiquitin-protein ligase
	TRINITY_DN26891_c0_g1	-10.4047	4.01e-17	3.58e-15	DOWN	NA	NA	NA	NA	NA	NA	NA	NA	NA	NA	NA
	TRINITY_DN41639_c0_g1	-10.4015	1.46e-18	1.58e-16	DOWN	NA	NA	NA	NA	NA	NA	NA	NA	NA	NA	NA
	TRINITY_DN299_c1_g1	-10.4004	3.73e-17	3.34e-15	DOWN	NA	NA	NA	NA	NA	NA	NA	NA	NA	NA	NA
	TRINITY_DN38954_c0_g1	-10.3996	5.5e-20	7.28e-18	DOWN	NA	NA	NA	NA	NA	NA	NA	NA	NA	NA	NA
	TRINITY_DN54936_c0_g1	-10.399	4.42e-18	4.5e-16	DOWN	TRINITY_DN54936_c0_g1	TraesCS1A01G328500.2	1	507	507	0	TraesCS1A01G328500	chr1A	517490072	517490653	DNA topoisomerase
	TRINITY_DN11283_c0_g2	-10.398	8.66e-18	8.5e-16	DOWN	TRINITY_DN11283_c0_g2	TraesCS2A01G039300.2	1	188	1521	8.5e-95	TraesCS2A01G039300	chr2A	16418431	16421303	RING/U-box superfamily protein
	TRINITY_DN103890_c0_g1	-10.3952	5.98e-19	6.83e-17	DOWN	TRINITY_DN103890_c0_g1	TraesCS7B01G380400.1	48	145	333	2.84e-33	TraesCS7B01G380400	chr7B	645257327	645257659	PKS-NRPS hybrid synthetase CHGG_01239
	TRINITY_DN24448_c0_g1	-10.3949	3.65e-07	7.07e-06	DOWN	TRINITY_DN24448_c0_g1	TraesCS1B01G222300.1	334	574	798	1.89e-124	TraesCS1B01G222300	chr1B	399798649	399799757	Expansin protein
	TRINITY_DN51692_c0_g1	-10.3935	2.17e-20	3.06e-18	DOWN	TRINITY_DN51692_c0_g1	TraesCS7B01G481500.1	1	902	1266	0	TraesCS7B01G481500	chr7B	735809058	735810323	Polynucleotidyl transferase, ribonuclease H-like superfamily protein
	TRINITY_DN16066_c0_g2	-10.392	2.64e-20	3.66e-18	DOWN	TRINITY_DN16066_c0_g2	TraesCS5B01G422400.1	5317	5606	5631	1.34e-151	TraesCS5B01G422400	chr5B	597289088	597305326	NBS-LRR-like resistance protein
	TRINITY_DN83834_c0_g1	-10.3904	5.63e-11	1.96e-09	DOWN	NA	NA	NA	NA	NA	NA	NA	NA	NA	NA	NA
	TRINITY_DN21132_c0_g1	-10.3903	2.51e-19	3.01e-17	DOWN	TRINITY_DN21132_c0_g1	TraesCS7D01G442200.1	886	999	999	3.47e-47	TraesCS7D01G442200	chr7D	561700107	561704946	Peroxidase
	TRINITY_DN3138_c2_g1	-10.39	5.44e-20	7.22e-18	DOWN	NA	NA	NA	NA	NA	NA	NA	NA	NA	NA	NA
	TRINITY_DN95619_c0_g1	-10.388	2.17e-18	2.31e-16	DOWN	TRINITY_DN95619_c0_g1	TraesCS2B01G623800.1	397	462	462	7.72e-24	TraesCS2B01G623800	chr2B	797242842	797243303	Aminotransferase-like, plant mobile domain family protein
	TRINITY_DN112_c0_g2	-10.3856	2.65e-16	2.11e-14	DOWN	TRINITY_DN112_c0_g2	TraesCS1D01G385200.1	31	229	1560	1.52e-100	TraesCS1D01G385200	chr1D	458678276	458682258	Sulfhydryl oxidase
	TRINITY_DN62753_c0_g2	-10.3812	1.27e-17	1.22e-15	DOWN	NA	NA	NA	NA	NA	NA	NA	NA	NA	NA	NA
	TRINITY_DN41208_c0_g2	-10.3788	1.89e-19	2.3e-17	DOWN	NA	NA	NA	NA	NA	NA	NA	NA	NA	NA	NA
	TRINITY_DN18609_c0_g1	-10.3732	3.97e-20	5.35e-18	DOWN	TRINITY_DN18609_c0_g1	TraesCS6B01G363200.1	2366	2403	2403	2.48e-11	TraesCS6B01G363200	chr6B	634331239	634335815	THO complex subunit 5
	TRINITY_DN24852_c0_g1	-10.3727	4.38e-20	5.87e-18	DOWN	NA	NA	NA	NA	NA	NA	NA	NA	NA	NA	NA
	TRINITY_DN100510_c0_g1	-10.3715	8.66e-15	5.46e-13	DOWN	TRINITY_DN100510_c0_g1	TraesCS2B01G163300.1	1047	1249	1449	4.49e-100	TraesCS2B01G163300	chr2B	135691692	135697878	Protein DETOXIFICATION
	TRINITY_DN67089_c1_g1	-10.3699	2.28e-17	2.11e-15	DOWN	TRINITY_DN67089_c1_g1	TraesCS6B01G437200.1	1195	1497	1497	9.87e-151	TraesCS6B01G437200	chr6B	704371677	704374366	FBD-associated F-box protein
	TRINITY_DN14053_c0_g4	-10.3697	3.58e-20	4.87e-18	DOWN	NA	NA	NA	NA	NA	NA	NA	NA	NA	NA	NA
	TRINITY_DN16350_c1_g1	-10.3672	3.43e-20	4.67e-18	DOWN	NA	NA	NA	NA	NA	NA	NA	NA	NA	NA	NA
	TRINITY_DN23890_c0_g1	-10.3664	2.9e-16	2.28e-14	DOWN	NA	NA	NA	NA	NA	NA	NA	NA	NA	NA	NA
	TRINITY_DN15969_c0_g2	-10.3623	4.15e-07	7.96e-06	DOWN	TRINITY_DN15969_c0_g2	TraesCS7D01G552500.1	927	1005	1005	4.83e-29	TraesCS7D01G552500	chr7D	635516907	635520421	'putative beta-1,3-glucanase
	TRINITY_DN25290_c0_g1	-10.3612	6.47e-20	8.46e-18	DOWN	NA	NA	NA	NA	NA	NA	NA	NA	NA	NA	NA
	TRINITY_DN72615_c0_g1	-10.3609	4.02e-20	5.41e-18	DOWN	TRINITY_DN72615_c0_g1	TraesCS7A01G557800.1	4208	4565	5298	2.76e-164	TraesCS7A01G557800	chr7A	730454303	730464405	Chromodomain-helicase-DNA-binding family protein
	TRINITY_DN19030_c0_g2	-10.3582	6.48e-16	4.87e-14	DOWN	TRINITY_DN19030_c0_g2	TraesCS7B01G454600.1	2204	2373	2373	2.37e-71	TraesCS7B01G454600	chr7B	715251865	715259121	ARM repeat superfamily protein
	TRINITY_DN32739_c0_g1	-10.357	1.85e-38	3.5e-35	DOWN	NA	NA	NA	NA	NA	NA	NA	NA	NA	NA	NA
	TRINITY_DN17219_c0_g5	-10.3537	2.97e-17	2.7e-15	DOWN	TRINITY_DN17219_c0_g5	TraesCS2A01G007000.1	3236	3590	4263	0	TraesCS2A01G007000	chr2A	2986007	2990362	Disease resistance protein (NBS-LRR class) family
	TRINITY_DN84045_c0_g1	-10.3518	6.24e-15	4.01e-13	DOWN	TRINITY_DN84045_c0_g1	TraesCS2B01G496700.1	1922	2142	4515	3.94e-86	TraesCS2B01G496700	chr2B	693321635	693326149	NBS-LRR disease resistance protein-like protein
	TRINITY_DN39689_c0_g2	-10.3505	5.27e-20	7e-18	DOWN	TRINITY_DN39689_c0_g2	TraesCS7D01G274700.1	59	156	942	6.46e-12	TraesCS7D01G274700	chr7D	264319784	264320725	DUF241 domain protein (DUF241)
	TRINITY_DN24206_c0_g2	-10.3478	7.79e-19	8.76e-17	DOWN	NA	NA	NA	NA	NA	NA	NA	NA	NA	NA	NA
	TRINITY_DN106463_c1_g1	-10.3441	8.13e-20	1.05e-17	DOWN	TRINITY_DN106463_c1_g1	TraesCS2B01G561500.1	1	66	273	3.63e-27	TraesCS2B01G561500	chr2B	754010826	754011342	Wound-responsive family protein
	TRINITY_DN30798_c0_g2	-10.3434	1.18e-19	1.48e-17	DOWN	NA	NA	NA	NA	NA	NA	NA	NA	NA	NA	NA
	TRINITY_DN60438_c0_g1	-10.3425	5.61e-07	1.05e-05	DOWN	TRINITY_DN60438_c0_g1	TraesCS3D01G488300.1	8	316	1266	1.03e-43	TraesCS3D01G488300	chr3D	583035795	583043243	WAT1-related protein
	TRINITY_DN19088_c0_g2	-10.3418	7.14e-18	7.08e-16	DOWN	TRINITY_DN19088_c0_g2	TraesCS7B01G314800.1	1	51	1287	1.23e-18	TraesCS7B01G314800	chr7B	562401742	562405746	Delta-aminolevulinic acid dehydratase
	TRINITY_DN37037_c0_g1	-10.3417	2.07e-18	2.21e-16	DOWN	NA	NA	NA	NA	NA	NA	NA	NA	NA	NA	NA
	TRINITY_DN54815_c0_g3	-10.3414	7.36e-20	9.58e-18	DOWN	TRINITY_DN54815_c0_g3	TraesCS2A01G087500.1	3	105	552	3.18e-24	TraesCS2A01G087500	chr2A	41150319	41150965	Adenosine monophosphate-protein transferase and cysteine protease IbpA
	TRINITY_DN82778_c2_g1	-10.3394	1.64e-19	2.02e-17	DOWN	NA	NA	NA	NA	NA	NA	NA	NA	NA	NA	NA
	TRINITY_DN41564_c0_g1	-10.3389	1.38e-19	1.72e-17	DOWN	TRINITY_DN41564_c0_g1	TraesCS4D01G136800.1	584	923	1350	5.62e-161	TraesCS4D01G136800	chr4D	122757149	122760988	Glucan endo-1,3-beta-glucosidase
	TRINITY_DN26812_c0_g2	-10.3388	1.2e-18	1.32e-16	DOWN	TRINITY_DN26812_c0_g2	TraesCS2A01G528800.1	269	303	303	7.87e-10	TraesCS2A01G528800	chr2A	747616608	747618897	Small nuclear ribonucleoprotein family protein
	TRINITY_DN24525_c0_g2	-10.3349	3.7e-14	2.1e-12	DOWN	TRINITY_DN24525_c0_g2	TraesCS2B01G496700.1	1016	1544	4515	8.76e-171	TraesCS2B01G496700	chr2B	693321635	693326149	NBS-LRR disease resistance protein-like protein
	TRINITY_DN57323_c0_g1	-10.3327	1.88e-18	2.01e-16	DOWN	TRINITY_DN57323_c0_g1	TraesCS3D01G004200.1	1117	1251	1251	1.38e-55	TraesCS3D01G004200	chr3D	1743863	1745113	Cell division cycle protein 123
	TRINITY_DN52467_c0_g2	-10.3312	4.54e-18	4.6e-16	DOWN	NA	NA	NA	NA	NA	NA	NA	NA	NA	NA	NA
	TRINITY_DN636_c0_g3	-10.3301	5.77e-19	6.61e-17	DOWN	TRINITY_DN636_c0_g3	TraesCS1D01G410000.1	72	169	324	1.96e-33	TraesCS1D01G410000	chr1D	471610395	471613206	Histidine-containing phosphotransfer protein
	TRINITY_DN40775_c1_g1	-10.3266	3.5e-19	4.13e-17	DOWN	TRINITY_DN40775_c1_g1	TraesCS1D01G376000.1	281	447	1491	2.27e-73	TraesCS1D01G376000	chr1D	452502475	452506168	Kinase family protein
	TRINITY_DN167743_c0_g1	-10.3157	8.94e-20	1.15e-17	DOWN	TRINITY_DN167743_c0_g1	TraesCS3A01G350300.1	61	130	660	5.03e-24	TraesCS3A01G350300	chr3A	598907062	598908207	Rho GTPase activating protein with PAK-box/P21-Rho-binding domain-containing protein
	TRINITY_DN29639_c0_g2	-10.3133	9e-20	1.16e-17	DOWN	TRINITY_DN29639_c0_g2	TraesCS1A01G360500.1	1	53	1194	4e-18	TraesCS1A01G360500	chr1A	541633003	541635882	Nucleosome assembly protein 1-like 1
	TRINITY_DN142409_c0_g1	-10.3128	4.66e-12	1.94e-10	DOWN	TRINITY_DN142409_c0_g1	TraesCS1B01G394500.1	235	291	291	3.53e-22	TraesCS1B01G394500	chr1B	626601013	626601303	Lipid transfer protein
	TRINITY_DN42452_c1_g1	-10.3109	8.81e-19	9.83e-17	DOWN	TRINITY_DN42452_c1_g1	TraesCS7D01G403100.1	149	808	1047	0	TraesCS7D01G403100	chr7D	520399788	520401885	WAT1-related protein
	TRINITY_DN69123_c0_g1	-10.3065	5.07e-12	2.09e-10	DOWN	TRINITY_DN69123_c0_g1	TraesCS2B01G164000.1	858	948	948	2.71e-39	TraesCS2B01G164000	chr2B	136167352	136173220	Mitochondrial inner membrane translocase subunit Tim44
	TRINITY_DN85676_c0_g1	-10.3064	3.15e-15	2.11e-13	DOWN	TRINITY_DN85676_c0_g1	TraesCS2B01G544200.1	709	993	1599	1.75e-130	TraesCS2B01G544200	chr2B	741443078	741447007	Glycerol kinase
	TRINITY_DN88987_c0_g1	-10.306	1.49e-08	3.6e-07	DOWN	TRINITY_DN88987_c0_g1	TraesCS7A01G454600.1	551	846	966	8.57e-49	TraesCS7A01G454600	chr7A	649421394	649422598	Early nodulin-like protein
	TRINITY_DN41250_c0_g1	-10.3053	7.3e-16	5.43e-14	DOWN	TRINITY_DN41250_c0_g1	TraesCS7D01G347600.1	1228	1545	1545	2.02e-108	TraesCS7D01G347600	chr7D	446996239	446997868	Cytochrome P450 family protein
	TRINITY_DN4492_c1_g1	-10.3047	1.41e-11	5.37e-10	DOWN	TRINITY_DN4492_c1_g1	TraesCS2A01G014800.1	1	190	1185	1.24e-92	TraesCS2A01G014800	chr2A	5910946	5912235	Chalcone synthase
	TRINITY_DN11299_c2_g1	-10.3036	1.06e-19	1.34e-17	DOWN	TRINITY_DN11299_c2_g1	TraesCS7D01G426600.1	598	388	750	1.69e-99	TraesCS7D01G426600	chr7D	547457472	547458221	Thaumatin-like protein
	TRINITY_DN42379_c0_g1	-10.3019	1.22e-19	1.54e-17	DOWN	TRINITY_DN42379_c0_g1	TraesCSU01G007800.1	234	438	1515	1.62e-104	TraesCSU01G007800	chrUn	11739970	11748040	Protein DA1-related 1
	TRINITY_DN30031_c0_g1	-10.2997	3.5e-17	3.14e-15	DOWN	TRINITY_DN30031_c0_g1	TraesCS7B01G458700.1	306	527	2178	1.36e-110	TraesCS7B01G458700	chr7B	716957969	716966179	Protein ENHANCED DISEASE RESISTANCE 2
	TRINITY_DN41647_c0_g1	-10.2995	2.7e-19	3.22e-17	DOWN	TRINITY_DN41647_c0_g1	TraesCS4A01G381600.1	2268	3225	3951	0	TraesCS4A01G381600	chr4A	658964415	658968365	NBS-LRR disease resistance protein-like protein
	TRINITY_DN33626_c0_g1	-10.2912	1.97e-12	8.63e-11	DOWN	TRINITY_DN33626_c0_g1	TraesCS7A01G539100.1	28	247	1065	3.88e-86	TraesCS7A01G539100	chr7A	716246289	716248320	receptor kinase 1
	TRINITY_DN29692_c0_g1	-10.2892	3.84e-19	4.51e-17	DOWN	TRINITY_DN29692_c0_g1	TraesCS7D01G347300.1	930	1068	1077	2.85e-49	TraesCS7D01G347300	chr7D	446917597	446920116	Peroxidase
	TRINITY_DN39980_c1_g1	-10.2848	3.45e-14	1.98e-12	DOWN	TRINITY_DN39980_c1_g1	TraesCS2A01G014900.1	1	255	1542	4.54e-132	TraesCS2A01G014900	chr2A	5927654	5929693	Cytochrome P450
	TRINITY_DN105689_c0_g1	-10.2832	1.01e-18	1.12e-16	DOWN	NA	NA	NA	NA	NA	NA	NA	NA	NA	NA	NA
	TRINITY_DN43052_c0_g1	-10.2829	1.73e-19	2.13e-17	DOWN	NA	NA	NA	NA	NA	NA	NA	NA	NA	NA	NA
	TRINITY_DN28038_c0_g1	-10.2818	1.57e-19	1.94e-17	DOWN	NA	NA	NA	NA	NA	NA	NA	NA	NA	NA	NA
	TRINITY_DN59226_c0_g1	-10.2814	2.39e-19	2.87e-17	DOWN	TRINITY_DN59226_c0_g1	TraesCS4B01G392600.1	312	558	1641	1.97e-114	TraesCS4B01G392600	chr4B	667612956	667617800	Folylpolyglutamate synthase
	TRINITY_DN169407_c0_g1	-10.2776	1.85e-19	2.27e-17	DOWN	NA	NA	NA	NA	NA	NA	NA	NA	NA	NA	NA
	TRINITY_DN8552_c3_g1	-10.2744	2.87e-19	3.41e-17	DOWN	TRINITY_DN8552_c3_g1	TraesCS7B01G463000.1	125	1451	3048	0	TraesCS7B01G463000	chr7B	720067596	720076035	receptor kinase 1
	TRINITY_DN176931_c0_g1	-10.2726	1.12e-18	1.24e-16	DOWN	NA	NA	NA	NA	NA	NA	NA	NA	NA	NA	NA
	TRINITY_DN35583_c0_g1	-10.272	2.49e-19	2.99e-17	DOWN	TRINITY_DN35583_c0_g1	TraesCS7A01G430100.1	1117	1203	1203	6.66e-32	TraesCS7A01G430100	chr7A	624809305	624821204	ARM repeat superfamily protein
	TRINITY_DN33480_c0_g1	-10.2693	1.89e-19	2.3e-17	DOWN	NA	NA	NA	NA	NA	NA	NA	NA	NA	NA	NA
	TRINITY_DN102452_c0_g2	-10.2687	1.21e-08	2.98e-07	DOWN	TRINITY_DN102452_c0_g2	TraesCS7B01G446100.1	82	390	390	2.17e-98	TraesCS7B01G446100	chr7B	709496311	709496700	Chaperone protein dnaJ
	TRINITY_DN54535_c0_g1	-10.2655	4.26e-19	4.99e-17	DOWN	NA	NA	NA	NA	NA	NA	NA	NA	NA	NA	NA
	TRINITY_DN437_c14_g1	-10.2638	2.15e-10	6.9e-09	DOWN	NA	NA	NA	NA	NA	NA	NA	NA	NA	NA	NA
	TRINITY_DN39147_c0_g1	-10.2627	2.04e-17	1.9e-15	DOWN	TRINITY_DN39147_c0_g1	TraesCS3B01G485600.1	265	563	969	6.57e-135	TraesCS3B01G485600	chr3B	732427503	732430696	Heparan-alpha-glucosaminide N-acetyltransferase
	TRINITY_DN30983_c0_g1	-10.2599	5.66e-19	6.51e-17	DOWN	NA	NA	NA	NA	NA	NA	NA	NA	NA	NA	NA
	TRINITY_DN34095_c0_g1	-10.2583	1.16e-11	4.49e-10	DOWN	NA	NA	NA	NA	NA	NA	NA	NA	NA	NA	NA
	TRINITY_DN12795_c0_g1	-10.258	1.96e-17	1.83e-15	DOWN	NA	NA	NA	NA	NA	NA	NA	NA	NA	NA	NA
	TRINITY_DN34276_c0_g1	-10.2538	3.11e-14	1.8e-12	DOWN	TRINITY_DN34276_c0_g1	TraesCS7D01G383100.1	381	678	1248	2.36e-134	TraesCS7D01G383100	chr7D	496785466	496786713	Malate dehydrogenase
	TRINITY_DN8366_c3_g1	-10.2505	3.02e-15	2.02e-13	DOWN	NA	NA	NA	NA	NA	NA	NA	NA	NA	NA	NA
	TRINITY_DN5149_c2_g1	-10.244	1.15e-40	2.71e-37	DOWN	TRINITY_DN5149_c2_g1	TraesCSU01G207700.1	621	1152	1152	0	TraesCSU01G207700	chrUn	308271802	308273085	Cysteine protease, putative
	TRINITY_DN21888_c0_g2	-10.2425	2.25e-07	4.53e-06	DOWN	TRINITY_DN21888_c0_g2	TraesCS4A01G325200.1	1	101	1149	6.65e-30	TraesCS4A01G325200	chr4A	612531673	612533481	F-box family protein
	TRINITY_DN78799_c3_g1	-10.2403	6.05e-18	6.04e-16	DOWN	NA	NA	NA	NA	NA	NA	NA	NA	NA	NA	NA
	TRINITY_DN52822_c0_g1	-10.2382	2.08e-17	1.94e-15	DOWN	TRINITY_DN52822_c0_g1	TraesCS4D01G092400.1	430	561	561	8.87e-64	TraesCS4D01G092400	chr4D	67325629	67326189	Dirigent protein
	TRINITY_DN227156_c0_g1	-10.2378	1.84e-18	1.97e-16	DOWN	NA	NA	NA	NA	NA	NA	NA	NA	NA	NA	NA
	TRINITY_DN80379_c0_g1	-10.2372	1.47e-18	1.59e-16	DOWN	TRINITY_DN80379_c0_g1	TraesCS7B01G482400.1	4585	4886	4923	1.43e-106	TraesCS7B01G482400	chr7B	740048884	740057141	Chromodomain-helicase-DNA-binding family protein
	TRINITY_DN29915_c0_g1	-10.237	3.74e-14	2.12e-12	DOWN	TRINITY_DN29915_c0_g1	TraesCS4A01G418200.1	1	84	1818	4.23e-37	TraesCS4A01G418200	chr4A	688097442	688100234	Starch synthase, chloroplastic/amyloplastic
	TRINITY_DN186543_c0_g1	-10.2338	2.98e-11	1.08e-09	DOWN	TRINITY_DN186543_c0_g1	TraesCS4A01G347800.2	1821	1866	1866	3.54e-14	TraesCS4A01G347800	chr4A	625531333	625534526	Phospholipase D
	TRINITY_DN50278_c0_g1	-10.2326	7.31e-13	3.4e-11	DOWN	TRINITY_DN50278_c0_g1	TraesCS5D01G138700.1	66	131	303	3.4e-20	TraesCS5D01G138700	chr5D	220754227	220755842	disease resistance protein (TIR-NBS-LRR class) family
	TRINITY_DN18965_c0_g1	-10.2312	4.18e-18	4.28e-16	DOWN	TRINITY_DN18965_c0_g1	TraesCS2A01G039300.1	1279	1518	1518	9.63e-122	TraesCS2A01G039300	chr2A	16418431	16421303	RING/U-box superfamily protein
	TRINITY_DN27678_c0_g5	-10.2307	2.48e-16	1.98e-14	DOWN	NA	NA	NA	NA	NA	NA	NA	NA	NA	NA	NA
	TRINITY_DN37714_c0_g1	-10.2276	4.36e-19	5.09e-17	DOWN	NA	NA	NA	NA	NA	NA	NA	NA	NA	NA	NA
	TRINITY_DN48502_c0_g1	-10.2249	6.39e-06	9.43e-05	DOWN	TRINITY_DN48502_c0_g1	TraesCSU01G008900.1	1440	1491	1491	2.3e-19	TraesCSU01G008900	chrUn	12461804	12463641	Cytochrome P450
	TRINITY_DN54772_c0_g1	-10.2246	9.56e-19	1.06e-16	DOWN	TRINITY_DN54772_c0_g1	TraesCS5D01G288100.4	252	309	540	7.76e-21	TraesCS5D01G288100	chr5D	387626001	387629575	50S ribosomal L31
	TRINITY_DN15842_c0_g1	-10.2215	1.94e-15	1.36e-13	DOWN	NA	NA	NA	NA	NA	NA	NA	NA	NA	NA	NA
	TRINITY_DN852_c4_g1	-10.2211	7.8e-08	1.69e-06	DOWN	NA	NA	NA	NA	NA	NA	NA	NA	NA	NA	NA
	TRINITY_DN2892_c0_g2	-10.2194	1.09e-10	3.62e-09	DOWN	TRINITY_DN2892_c0_g2	TraesCS3A01G364300.1	156	1	351	3.08e-72	TraesCS3A01G364300	chr3A	613171405	613171851	Lipid transfer protein
	TRINITY_DN24690_c0_g1	-10.2193	1.49e-16	1.23e-14	DOWN	NA	NA	NA	NA	NA	NA	NA	NA	NA	NA	NA
	TRINITY_DN44249_c0_g1	-10.2189	7.21e-19	8.13e-17	DOWN	TRINITY_DN44249_c0_g1	TraesCS7B01G078500.1	653	735	735	2.35e-31	TraesCS7B01G078500	chr7B	88312612	88315491	WW domain-binding protein 4
	TRINITY_DN54014_c2_g1	-10.2189	7.21e-19	8.13e-17	DOWN	TRINITY_DN54014_c2_g1	TraesCS2A01G007000.1	3597	4120	4263	0	TraesCS2A01G007000	chr2A	2986007	2990362	Disease resistance protein (NBS-LRR class) family
	TRINITY_DN74697_c0_g1	-10.2177	8.54e-16	6.3e-14	DOWN	TRINITY_DN74697_c0_g1	TraesCS5D01G543600.1	417	520	1329	2.24e-34	TraesCS5D01G543600	chr5D	553677988	553682129	26S proteasome non-ATPase regulatory subunit
	TRINITY_DN115681_c0_g2	-10.2176	2.18e-18	2.31e-16	DOWN	TRINITY_DN115681_c0_g2	TraesCS3B01G323100.1	2098	2217	2217	8.55e-42	TraesCS3B01G323100	chr3B	522784901	522790681	CASC3/barentsz eIF4AIII-binding protein
	TRINITY_DN34233_c0_g1	-10.2166	1.87e-15	1.32e-13	DOWN	TRINITY_DN34233_c0_g1	TraesCS7A01G049300.1	806	876	876	7.43e-30	TraesCS7A01G049300	chr7A	22961980	22963857	SNAP25 homologous protein SNAP33
	TRINITY_DN55764_c0_g3	-10.2156	1.4e-18	1.53e-16	DOWN	NA	NA	NA	NA	NA	NA	NA	NA	NA	NA	NA
	TRINITY_DN44281_c0_g1	-10.2151	1.16e-18	1.28e-16	DOWN	TRINITY_DN44281_c0_g1	TraesCS5B01G420600.1	2498	2772	2970	2.85e-118	TraesCS5B01G420600	chr5B	596064520	596068717	NBS-LRR-like resistance protein
	TRINITY_DN21915_c0_g2	-10.2147	4.31e-19	5.04e-17	DOWN	TRINITY_DN21915_c0_g2	TraesCS7B01G177500.1	2304	2059	3948	7.1e-109	TraesCS7B01G177500	chr7B	253692313	253707666	Mediator of rna polymerase ii transcription subunit 15a
	TRINITY_DN73767_c0_g1	-10.2128	2.04e-15	1.42e-13	DOWN	TRINITY_DN73767_c0_g1	TraesCS7A01G434200.1	837	1200	1200	1.84e-153	TraesCS7A01G434200	chr7A	628007126	628012165	WD-repeat protein, putative
	TRINITY_DN44090_c0_g1	-10.2123	3.26e-18	3.39e-16	DOWN	NA	NA	NA	NA	NA	NA	NA	NA	NA	NA	NA
	TRINITY_DN23724_c0_g1	-10.2096	9.98e-11	3.34e-09	DOWN	TRINITY_DN23724_c0_g1	TraesCS3A01G072000.1	1	132	1617	7.91e-64	TraesCS3A01G072000	chr3A	44550052	44552640	F-box family protein
	TRINITY_DN24169_c0_g1	-10.2089	1.49e-17	1.42e-15	DOWN	TRINITY_DN24169_c0_g1	TraesCS2D01G062100.1	1045	1420	1566	1.38e-147	TraesCS2D01G062100	chr2D	26351137	26352848	Kinase family protein
	TRINITY_DN86513_c0_g1	-10.2082	4.98e-19	5.75e-17	DOWN	TRINITY_DN86513_c0_g1	TraesCS1D01G409900.1	349	429	558	1.11e-23	TraesCS1D01G409900	chr1D	471606088	471606857	Beta-adaptin-like protein
	TRINITY_DN66423_c0_g1	-10.2068	1.36e-15	9.75e-14	DOWN	NA	NA	NA	NA	NA	NA	NA	NA	NA	NA	NA
	TRINITY_DN39827_c0_g1	-10.2067	5.19e-14	2.87e-12	DOWN	NA	NA	NA	NA	NA	NA	NA	NA	NA	NA	NA
	TRINITY_DN82554_c0_g1	-10.2064	5.81e-19	6.65e-17	DOWN	TRINITY_DN82554_c0_g1	TraesCSU01G215200.1	224	825	825	0	TraesCSU01G215200	chrUn	318824007	318824906	UPF0226 protein YfcJ
	TRINITY_DN86744_c0_g1	-10.2032	1.19e-08	2.91e-07	DOWN	TRINITY_DN86744_c0_g1	TraesCS5D01G150100.1	1	403	1518	1.06e-139	TraesCS5D01G150100	chr5D	238778348	238783442	Protein DETOXIFICATION
	TRINITY_DN43360_c0_g1	-10.1997	1.39e-14	8.44e-13	DOWN	NA	NA	NA	NA	NA	NA	NA	NA	NA	NA	NA
	TRINITY_DN50402_c0_g2	-10.1981	1.56e-13	8.08e-12	DOWN	TRINITY_DN50402_c0_g2	TraesCS7A01G378800.1	841	1130	1374	2.98e-128	TraesCS7A01G378800	chr7A	554477125	554481033	Polyamine oxidase
	TRINITY_DN29932_c0_g1	-10.1936	2.77e-16	2.2e-14	DOWN	TRINITY_DN29932_c0_g1	TraesCS7A01G363100.1	778	1071	1071	1.12e-122	TraesCS7A01G363100	chr7A	537662528	537663805	GATA transcription factor
	TRINITY_DN30924_c0_g1	-10.1911	7.8e-09	1.97e-07	DOWN	TRINITY_DN30924_c0_g1	TraesCS6A01G411900.1	2716	2862	2862	3.87e-72	TraesCS6A01G411900	chr6A	613969591	613976261	Protein kinase family protein
	TRINITY_DN16167_c1_g2	-10.189	1.37e-18	1.49e-16	DOWN	NA	NA	NA	NA	NA	NA	NA	NA	NA	NA	NA
	TRINITY_DN24931_c0_g1	-10.1869	4.44e-17	3.94e-15	DOWN	NA	NA	NA	NA	NA	NA	NA	NA	NA	NA	NA
	TRINITY_DN52774_c0_g1	-10.1799	8.38e-19	9.38e-17	DOWN	TRINITY_DN52774_c0_g1	TraesCS3D01G016000.1	1481	1684	2004	5.8e-104	TraesCS3D01G016000	chr3D	5657277	5660156	Beta-fructofuranosidase, insoluble isoenzyme 3
	TRINITY_DN42119_c0_g2	-10.1785	1.49e-17	1.42e-15	DOWN	TRINITY_DN42119_c0_g2	TraesCS6B01G437200.1	338	1034	1497	0	TraesCS6B01G437200	chr6B	704371677	704374366	FBD-associated F-box protein
	TRINITY_DN71035_c2_g2	-10.1782	7.6e-19	8.57e-17	DOWN	NA	NA	NA	NA	NA	NA	NA	NA	NA	NA	NA
	TRINITY_DN38615_c0_g1	-10.1779	4.79e-16	3.65e-14	DOWN	NA	NA	NA	NA	NA	NA	NA	NA	NA	NA	NA
	TRINITY_DN25379_c0_g1	-10.1777	8.05e-19	9.05e-17	DOWN	TRINITY_DN25379_c0_g1	TraesCS6B01G346600.1	335	1257	1257	0	TraesCS6B01G346600	chr6B	610804613	610807774	Myb/SANT-like DNA-binding domain protein
	TRINITY_DN31434_c0_g2	-10.174	1.07e-17	1.03e-15	DOWN	TRINITY_DN31434_c0_g2	TraesCS7A01G566000.1	4602	4867	5682	1.27e-121	TraesCS7A01G566000	chr7A	735404983	735420477	Lysine-specific demethylase
	TRINITY_DN16019_c0_g1	-10.1721	8.83e-19	9.85e-17	DOWN	NA	NA	NA	NA	NA	NA	NA	NA	NA	NA	NA
	TRINITY_DN190_c2_g1	-10.1688	1.44e-18	1.56e-16	DOWN	TRINITY_DN190_c2_g1	TraesCS6A01G408200.1	422	558	558	4.81e-66	TraesCS6A01G408200	chr6A	613097678	613100422	Ribonuclease 3
	TRINITY_DN8688_c1_g1	-10.1678	1.82e-17	1.71e-15	DOWN	TRINITY_DN8688_c1_g1	TraesCS7A01G552600.1	227	334	2490	5.26e-30	TraesCS7A01G552600	chr7A	725456095	725461852	Copalyl diphosphate synthase-like protein
	TRINITY_DN39892_c1_g1	-10.1641	9.18e-11	3.1e-09	DOWN	NA	NA	NA	NA	NA	NA	NA	NA	NA	NA	NA
	TRINITY_DN48553_c0_g1	-10.1639	2.01e-15	1.4e-13	DOWN	NA	NA	NA	NA	NA	NA	NA	NA	NA	NA	NA
	TRINITY_DN11022_c10_g1	-10.1582	8.04e-15	5.09e-13	DOWN	TRINITY_DN11022_c10_g1	TraesCS7A01G044300.1	1824	2059	2700	2.41e-118	TraesCS7A01G044300	chr7A	20482829	20485783	NBS-LRR disease resistance protein, putative, expressed
	TRINITY_DN61483_c0_g1	-10.1554	1.05e-14	6.49e-13	DOWN	TRINITY_DN61483_c0_g1	TraesCS7B01G435900.1	86	191	690	1.03e-42	TraesCS7B01G435900	chr7B	702452717	702454951	Actin-related protein 2/3 complex subunit 3
	TRINITY_DN42036_c0_g1	-10.1531	2.36e-16	1.89e-14	DOWN	TRINITY_DN42036_c0_g1	TraesCS7A01G491200.1	2104	2307	2367	2.73e-92	TraesCS7A01G491200	chr7A	680326956	680333790	Kinase
	TRINITY_DN29908_c0_g1	-10.1514	3.02e-17	2.74e-15	DOWN	TRINITY_DN29908_c0_g1	TraesCS2D01G480600.1	234	403	579	1.31e-72	TraesCS2D01G480600	chr2D	582869051	582872375	HVA22-like protein
	TRINITY_DN21445_c0_g1	-10.1481	6.9e-18	6.86e-16	DOWN	NA	NA	NA	NA	NA	NA	NA	NA	NA	NA	NA
	TRINITY_DN64221_c0_g3	-10.1461	2.96e-18	3.1e-16	DOWN	NA	NA	NA	NA	NA	NA	NA	NA	NA	NA	NA
	TRINITY_DN65200_c0_g2	-10.1458	3.19e-18	3.33e-16	DOWN	TRINITY_DN65200_c0_g2	TraesCS7A01G003600.1	1249	1545	1545	1.94e-153	TraesCS7A01G003600	chr7A	1849290	1852248	Homogentisate 1,2-dioxygenase
	TRINITY_DN29276_c0_g1	-10.1452	2.44e-17	2.25e-15	DOWN	TRINITY_DN29276_c0_g1	TraesCS6D01G201200.1	432	569	570	6.27e-52	TraesCS6D01G201200	chr6D	283301159	283304178	Glutathione reductase
	TRINITY_DN22251_c0_g1	-10.1394	1.69e-14	1.01e-12	DOWN	NA	NA	NA	NA	NA	NA	NA	NA	NA	NA	NA
	TRINITY_DN16218_c0_g3	-10.1388	1.11e-06	1.96e-05	DOWN	NA	NA	NA	NA	NA	NA	NA	NA	NA	NA	NA
	TRINITY_DN31299_c1_g1	-10.1375	1.91e-18	2.04e-16	DOWN	TRINITY_DN31299_c1_g1	TraesCS2D01G566400.1	2074	2214	2214	5.63e-57	TraesCS2D01G566400	chr2D	635593638	635597381	Histone-lysine N-methyltransferase
	TRINITY_DN44104_c0_g1	-10.1369	2.26e-18	2.39e-16	DOWN	TRINITY_DN44104_c0_g1	TraesCS6B01G070900.1	2877	3153	4299	4.86e-111	TraesCS6B01G070900	chr6B	47276593	47282041	NBS-LRR-like resistance protein
	TRINITY_DN63523_c0_g2	-10.1353	2.88e-14	1.67e-12	DOWN	TRINITY_DN63523_c0_g2	TraesCS4D01G341800.1	726	978	1011	2.05e-104	TraesCS4D01G341800	chr4D	498572979	498576397	2-oxoglutarate (2OG) and Fe(II)-dependent oxygenase superfamily protein
	TRINITY_DN13626_c1_g1	-10.1342	1.79e-15	1.26e-13	DOWN	TRINITY_DN13626_c1_g1	TraesCS2D01G529000.1	369	163	1278	6e-99	TraesCS2D01G529000	chr2D	616525015	616531466	transcription factor-like protein
	TRINITY_DN17721_c0_g1	-10.1305	1.73e-11	6.5e-10	DOWN	TRINITY_DN17721_c0_g1	TraesCS7A01G450500.1	1137	1202	1227	7.15e-22	TraesCS7A01G450500	chr7A	644111425	644114681	Beta-glucosidase, putative
	TRINITY_DN42586_c0_g1	-10.1302	7.93e-16	5.87e-14	DOWN	NA	NA	NA	NA	NA	NA	NA	NA	NA	NA	NA
	TRINITY_DN29535_c1_g1	-10.1278	3.7e-07	7.18e-06	DOWN	TRINITY_DN29535_c1_g1	TraesCS2B01G560800.1	199	267	267	1.38e-25	TraesCS2B01G560800	chr2B	753950057	753950323	Wound-responsive family protein
	TRINITY_DN71397_c0_g1	-10.1244	6.29e-17	5.49e-15	DOWN	TRINITY_DN71397_c0_g1	TraesCS7B01G387800.1	620	899	1389	2.25e-119	TraesCS7B01G387800	chr7B	653888391	653890709	Protein FAR1-RELATED SEQUENCE 5
	TRINITY_DN58150_c0_g1	-10.1221	4.01e-16	3.09e-14	DOWN	NA	NA	NA	NA	NA	NA	NA	NA	NA	NA	NA
	TRINITY_DN39206_c0_g4	-10.1218	2.15e-18	2.29e-16	DOWN	TRINITY_DN39206_c0_g4	TraesCS2D01G320000.1	86	385	393	3.11e-27	TraesCS2D01G320000	chr2D	411382725	411383117	Retrotransposon protein, putative, unclassified
	TRINITY_DN102407_c0_g1	-10.1213	2.48e-18	2.62e-16	DOWN	TRINITY_DN102407_c0_g1	TraesCS7A01G374400.1	1085	1140	1188	1.71e-12	TraesCS7A01G374400	chr7A	547142812	547146424	Protein Ycf2
	TRINITY_DN48681_c0_g1	-10.119	5.38e-06	8.09e-05	DOWN	TRINITY_DN48681_c0_g1	TraesCSU01G222800.1	525	600	600	8.6e-33	TraesCSU01G222800	chrUn	329100342	329101083	Cysteine protease
	TRINITY_DN226489_c0_g1	-10.1177	2.35e-11	8.67e-10	DOWN	TRINITY_DN226489_c0_g1	TraesCS2A01G014800.1	1080	1185	1185	3.24e-49	TraesCS2A01G014800	chr2A	5910946	5912235	Chalcone synthase
	TRINITY_DN108522_c1_g1	-10.1136	2.92e-11	1.06e-09	DOWN	TRINITY_DN108522_c1_g1	TraesCS4A01G381600.1	2186	2441	3951	2.37e-89	TraesCS4A01G381600	chr4A	658964415	658968365	NBS-LRR disease resistance protein-like protein
	TRINITY_DN47268_c0_g1	-10.1116	3.09e-17	2.8e-15	DOWN	NA	NA	NA	NA	NA	NA	NA	NA	NA	NA	NA
	TRINITY_DN220144_c0_g1	-10.1104	1.9e-17	1.77e-15	DOWN	NA	NA	NA	NA	NA	NA	NA	NA	NA	NA	NA
	TRINITY_DN35408_c0_g1	-10.1096	3.31e-18	3.44e-16	DOWN	TRINITY_DN35408_c0_g1	TraesCS7A01G503900.1	2795	2850	2850	7.3e-18	TraesCS7A01G503900	chr7A	692340520	692348859	DNA-directed RNA polymerase
	TRINITY_DN21478_c0_g2	-10.1085	4.37e-18	4.45e-16	DOWN	NA	NA	NA	NA	NA	NA	NA	NA	NA	NA	NA
	TRINITY_DN19605_c0_g5	-10.1075	7.03e-17	6.1e-15	DOWN	NA	NA	NA	NA	NA	NA	NA	NA	NA	NA	NA
	TRINITY_DN51054_c1_g1	-10.1069	2.64e-15	1.8e-13	DOWN	NA	NA	NA	NA	NA	NA	NA	NA	NA	NA	NA
	TRINITY_DN249446_c0_g1	-10.1059	4.07e-18	4.18e-16	DOWN	NA	NA	NA	NA	NA	NA	NA	NA	NA	NA	NA
	TRINITY_DN28306_c3_g1	-10.1051	4.66e-16	3.56e-14	DOWN	TRINITY_DN28306_c3_g1	TraesCS7D01G421500.1	414	648	651	4.03e-111	TraesCS7D01G421500	chr7D	540852725	540853740	Fe/S biogenesis protein nfuA
	TRINITY_DN25810_c0_g1	-10.1041	2.97e-18	3.11e-16	DOWN	TRINITY_DN25810_c0_g1	TraesCS7D01G403700.1	1427	1652	1746	8.48e-98	TraesCS7D01G403700	chr7D	520827789	520832026	Mitogen-activated protein kinase
	TRINITY_DN37055_c0_g1	-10.101	1.18e-15	8.53e-14	DOWN	NA	NA	NA	NA	NA	NA	NA	NA	NA	NA	NA
	TRINITY_DN69642_c0_g1	-10.0997	1.56e-17	1.48e-15	DOWN	NA	NA	NA	NA	NA	NA	NA	NA	NA	NA	NA
	TRINITY_DN97428_c0_g1	-10.0939	5.66e-16	4.28e-14	DOWN	NA	NA	NA	NA	NA	NA	NA	NA	NA	NA	NA
	TRINITY_DN124940_c1_g1	-10.0936	1.19e-11	4.56e-10	DOWN	NA	NA	NA	NA	NA	NA	NA	NA	NA	NA	NA
	TRINITY_DN36623_c0_g1	-10.0934	4.58e-13	2.2e-11	DOWN	NA	NA	NA	NA	NA	NA	NA	NA	NA	NA	NA
	TRINITY_DN54964_c0_g1	-10.0921	4.49e-17	3.97e-15	DOWN	TRINITY_DN54964_c0_g1	TraesCS2A01G002900.1	1332	1548	1548	3.58e-109	TraesCS2A01G002900	chr2A	1783762	1785309	Cytochrome P450 family protein, expressed
	TRINITY_DN49968_c0_g1	-10.0915	1.49e-16	1.23e-14	DOWN	TRINITY_DN49968_c0_g1	TraesCS2D01G362100.1	1227	1293	1293	4.64e-26	TraesCS2D01G362100	chr2D	468099800	468102977	GTF2H2
	TRINITY_DN101871_c0_g1	-10.0909	7.61e-14	4.13e-12	DOWN	NA	NA	NA	NA	NA	NA	NA	NA	NA	NA	NA
	TRINITY_DN74104_c0_g1	-10.0896	1.2e-17	1.15e-15	DOWN	TRINITY_DN74104_c0_g1	TraesCS2A01G007200.2	1086	1122	1122	2.68e-09	TraesCS2A01G007200	chr2A	3106394	3110967	Cytomatrix protein-like protein
	TRINITY_DN53686_c0_g1	-10.0876	4.03e-18	4.15e-16	DOWN	TRINITY_DN53686_c0_g1	TraesCS2A01G175400.1	96	180	846	9.85e-23	TraesCS2A01G175400	chr2A	133704473	133706758	6-phosphogluconolactonase
	TRINITY_DN42519_c0_g1	-10.0864	9.98e-08	2.13e-06	DOWN	TRINITY_DN42519_c0_g1	TraesCS2A01G360000.1	442	357	480	1.1e-16	TraesCS2A01G360000	chr2A	603855754	603856938	Cysteine-rich receptor-like protein kinase 41
	TRINITY_DN16350_c1_g2	-10.0857	2.28e-08	5.39e-07	DOWN	NA	NA	NA	NA	NA	NA	NA	NA	NA	NA	NA
	TRINITY_DN43509_c0_g4	-10.0855	7.11e-14	3.87e-12	DOWN	TRINITY_DN43509_c0_g4	TraesCS1D01G017700.1	1992	2136	2136	7.47e-46	TraesCS1D01G017700	chr1D	7874407	7876992	Receptor-like kinase
	TRINITY_DN21449_c0_g2	-10.0842	1.19e-17	1.15e-15	DOWN	NA	NA	NA	NA	NA	NA	NA	NA	NA	NA	NA
	TRINITY_DN48195_c0_g1	-10.0839	1.61e-12	7.15e-11	DOWN	TRINITY_DN48195_c0_g1	TraesCS2A01G004500.1	728	1238	1542	0	TraesCS2A01G004500	chr2A	2405931	2407472	Cytochrome P450 family protein, expressed
	TRINITY_DN27127_c0_g1	-10.0831	1.88e-17	1.77e-15	DOWN	TRINITY_DN27127_c0_g1	TraesCS7D01G432800.1	300	664	1053	3.74e-128	TraesCS7D01G432800	chr7D	552324964	552326219	2-oxoglutarate (2OG) and Fe(II)-dependent oxygenase superfamily protein
	TRINITY_DN6960_c2_g1	-10.0825	1.41e-14	8.52e-13	DOWN	TRINITY_DN6960_c2_g1	TraesCS7B01G251600.1	975	1415	1632	5.82e-162	TraesCS7B01G251600	chr7B	464343345	464345064	Cytochrome P450 family protein
	TRINITY_DN19809_c0_g1	-10.0824	4.48e-18	4.55e-16	DOWN	NA	NA	NA	NA	NA	NA	NA	NA	NA	NA	NA
	TRINITY_DN30901_c0_g1	-10.0799	3.7e-18	3.82e-16	DOWN	NA	NA	NA	NA	NA	NA	NA	NA	NA	NA	NA
	TRINITY_DN23516_c1_g1	-10.079	1.43e-16	1.18e-14	DOWN	TRINITY_DN23516_c1_g1	TraesCS7B01G465100.1	1266	1481	1491	3.08e-85	TraesCS7B01G465100	chr7B	721210284	721212715	DDB1-and CUL4-associated factor
	TRINITY_DN95172_c1_g1	-10.0789	1.44e-13	7.53e-12	DOWN	TRINITY_DN95172_c1_g1	TraesCS1B01G364300.1	273	69	1023	1.63e-99	TraesCS1B01G364300	chr1B	593889417	593891058	LEM3 (Ligand-effect modulator 3) family protein
	TRINITY_DN23882_c3_g1	-10.0772	7.66e-09	1.93e-07	DOWN	NA	NA	NA	NA	NA	NA	NA	NA	NA	NA	NA
	TRINITY_DN20834_c0_g1	-10.0759	2.85e-14	1.66e-12	DOWN	NA	NA	NA	NA	NA	NA	NA	NA	NA	NA	NA
	TRINITY_DN29136_c0_g1	-10.0733	4.29e-18	4.37e-16	DOWN	TRINITY_DN29136_c0_g1	TraesCS1A01G061900.1	142	525	525	0	TraesCS1A01G061900	chr1A	42475682	42476283	GRF zinc finger family protein
	TRINITY_DN24374_c0_g1	-10.0709	5.41e-18	5.45e-16	DOWN	TRINITY_DN24374_c0_g1	TraesCS5A01G292400.1	1	146	396	6.71e-70	TraesCS5A01G292400	chr5A	502580841	502583290	cysteine-rich/transmembrane domain A-like protein
	TRINITY_DN34888_c1_g1	-10.0708	5.51e-18	5.54e-16	DOWN	NA	NA	NA	NA	NA	NA	NA	NA	NA	NA	NA
	TRINITY_DN175516_c0_g1	-10.0704	6.03e-18	6.02e-16	DOWN	TRINITY_DN175516_c0_g1	TraesCS4B01G346900.1	948	1011	1011	8.26e-21	TraesCS4B01G346900	chr4B	640532917	640536498	2-oxoglutarate (2OG) and Fe(II)-dependent oxygenase superfamily protein
	TRINITY_DN50402_c0_g1	-10.0685	1.32e-10	4.33e-09	DOWN	TRINITY_DN50402_c0_g1	TraesCS7A01G378800.1	746	808	1374	1.51e-20	TraesCS7A01G378800	chr7A	554477125	554481033	Polyamine oxidase
	TRINITY_DN56379_c1_g1	-10.0673	4.75e-18	4.8e-16	DOWN	NA	NA	NA	NA	NA	NA	NA	NA	NA	NA	NA
	TRINITY_DN24632_c1_g1	-10.0659	5.7e-07	1.06e-05	DOWN	TRINITY_DN24632_c1_g1	TraesCSU01G009100.1	1470	1512	1512	2.31e-14	TraesCSU01G009100	chrUn	12471986	12473616	Cytochrome P450
	TRINITY_DN25176_c1_g2	-10.0639	3.95e-16	3.05e-14	DOWN	TRINITY_DN25176_c1_g2	TraesCS6A01G406100.1	195	3	1179	4.14e-86	TraesCS6A01G406100	chr6A	611575953	611577930	Glutamyl-tRNA(Gln) amidotransferase subunit C
	TRINITY_DN143289_c0_g1	-10.0614	1.79e-17	1.68e-15	DOWN	NA	NA	NA	NA	NA	NA	NA	NA	NA	NA	NA
	TRINITY_DN14177_c0_g1	-10.0591	3.79e-17	3.39e-15	DOWN	TRINITY_DN14177_c0_g1	TraesCS1A01G065000.1	898	935	1020	3.51e-11	TraesCS1A01G065000	chr1A	47209815	47211960	Importin subunit beta-1
	TRINITY_DN63062_c0_g1	-10.059	4.85e-17	4.28e-15	DOWN	TRINITY_DN63062_c0_g1	TraesCS6B01G447700.1	1136	1218	1218	7.68e-35	TraesCS6B01G447700	chr6B	708046334	708047551	Divinyl reductase
	TRINITY_DN95178_c0_g1	-10.0585	2.96e-17	2.69e-15	DOWN	TRINITY_DN95178_c0_g1	TraesCS2B01G552800.1	217	682	1902	0	TraesCS2B01G552800	chr2B	748700958	748702859	Loricrin-like protein
	TRINITY_DN31604_c0_g1	-10.0575	1.98e-07	4.03e-06	DOWN	NA	NA	NA	NA	NA	NA	NA	NA	NA	NA	NA
	TRINITY_DN126225_c2_g1	-10.0569	5.62e-18	5.63e-16	DOWN	TRINITY_DN126225_c2_g1	TraesCS2A01G010200.1	139	396	1233	3.36e-132	TraesCS2A01G010200	chr2A	3964870	3967583	StAR-related lipid transfer protein
	TRINITY_DN20945_c2_g1	-10.0562	1.34e-17	1.28e-15	DOWN	TRINITY_DN20945_c2_g1	TraesCS7B01G492100.1	4135	4350	5712	2.9e-97	TraesCS7B01G492100	chr7B	744390501	744404964	Lysine-specific demethylase
	TRINITY_DN39013_c0_g1	-10.056	2.36e-16	1.89e-14	DOWN	TRINITY_DN39013_c0_g1	TraesCS7A01G557700.1	1	35	2301	5.55e-10	TraesCS7A01G557700	chr7A	730430976	730434251	Disease resistance protein (NBS-LRR class) family
	TRINITY_DN33303_c0_g3	-10.0542	1.35e-15	9.71e-14	DOWN	TRINITY_DN33303_c0_g3	TraesCS3B01G409900.1	1	125	585	6.49e-35	TraesCS3B01G409900	chr3B	646714968	646716702	Thioredoxin-like protein 4A
	TRINITY_DN30725_c0_g1	-10.0533	1.15e-07	2.44e-06	DOWN	TRINITY_DN30725_c0_g1	TraesCS7A01G498400.1	2187	2393	3183	2.78e-92	TraesCS7A01G498400	chr7A	688960704	688967847	Ubiquitin carboxyl-terminal hydrolase family protein
	TRINITY_DN55890_c0_g1	-10.0532	2.4e-11	8.84e-10	DOWN	TRINITY_DN55890_c0_g1	TraesCS7B01G293500.1	1	130	1149	1.14e-52	TraesCS7B01G293500	chr7B	530379677	530381853	Amino acid transporter-like protein
	TRINITY_DN83754_c0_g1	-10.0529	6.22e-17	5.44e-15	DOWN	TRINITY_DN83754_c0_g1	TraesCS2A01G038400.1	424	660	1440	1.44e-120	TraesCS2A01G038400	chr2A	16083847	16088456	Beta-glucosidase
	TRINITY_DN32954_c2_g1	-10.0493	2.54e-15	1.74e-13	DOWN	NA	NA	NA	NA	NA	NA	NA	NA	NA	NA	NA
	TRINITY_DN52905_c1_g1	-10.0492	2.76e-17	2.53e-15	DOWN	TRINITY_DN52905_c1_g1	TraesCS7D01G512800.1	702	762	1572	1.66e-24	TraesCS7D01G512800	chr7D	614275665	614277768	Cytochrome P450
	TRINITY_DN89942_c0_g1	-10.0481	4.28e-14	2.41e-12	DOWN	TRINITY_DN89942_c0_g1	TraesCS1B01G001800.1	2217	2470	3690	2.59e-123	TraesCS1B01G001800	chr1B	1430395	1435818	Phospholipid-transporting ATPase
	TRINITY_DN150003_c0_g2	-10.0463	2.96e-17	2.69e-15	DOWN	TRINITY_DN150003_c0_g2	TraesCS7A01G483300.1	1085	1446	1446	6.9e-108	TraesCS7A01G483300	chr7A	675021874	675023319	F-box family protein-like protein
	TRINITY_DN23770_c0_g1	-10.0457	2.38e-17	2.2e-15	DOWN	NA	NA	NA	NA	NA	NA	NA	NA	NA	NA	NA
	TRINITY_DN186380_c0_g1	-10.0432	9.89e-17	8.38e-15	DOWN	NA	NA	NA	NA	NA	NA	NA	NA	NA	NA	NA
	TRINITY_DN26230_c1_g1	-10.0429	7.63e-18	7.52e-16	DOWN	TRINITY_DN26230_c1_g1	TraesCS3A01G178100.1	4	123	1197	1.37e-46	TraesCS3A01G178100	chr3A	202634326	202636245	Ulp1 protease family, C-terminal catalytic domain containing protein, expressed
	TRINITY_DN73538_c0_g1	-10.0407	8.95e-14	4.79e-12	DOWN	NA	NA	NA	NA	NA	NA	NA	NA	NA	NA	NA
	TRINITY_DN58962_c1_g2	-10.0401	1.37e-13	7.2e-12	DOWN	NA	NA	NA	NA	NA	NA	NA	NA	NA	NA	NA
	TRINITY_DN25014_c0_g1	-10.0388	2.18e-17	2.02e-15	DOWN	TRINITY_DN25014_c0_g1	TraesCS7B01G086000.1	361	423	423	1.5e-23	TraesCS7B01G086000	chr7B	99101465	99105910	Mitochondrial 39S ribosomal protein L53
	TRINITY_DN4444_c3_g2	-10.0386	7.45e-18	7.36e-16	DOWN	TRINITY_DN4444_c3_g2	TraesCS6D01G278600.1	335	447	3363	7.57e-36	TraesCS6D01G278600	chr6D	386944938	386950973	RNA-dependent RNA polymerase
	TRINITY_DN39052_c0_g1	-10.0383	1.7e-16	1.39e-14	DOWN	NA	NA	NA	NA	NA	NA	NA	NA	NA	NA	NA
	TRINITY_DN51574_c0_g1	-10.0342	8.28e-18	8.14e-16	DOWN	TRINITY_DN51574_c0_g1	TraesCS7B01G495200.1	2751	3603	3768	2.64e-143	TraesCS7B01G495200	chr7B	746382715	746386482	Disease resistance protein (NBS-LRR class) family
	TRINITY_DN41307_c0_g4	-10.0339	4.11e-16	3.16e-14	DOWN	NA	NA	NA	NA	NA	NA	NA	NA	NA	NA	NA
	TRINITY_DN41637_c0_g1	-10.0327	3.73e-16	2.89e-14	DOWN	TRINITY_DN41637_c0_g1	TraesCS7A01G377600.1	995	1341	1341	1.28e-127	TraesCS7A01G377600	chr7A	553037005	553043382	Non-specific serine/threonine protein kinase
	TRINITY_DN219260_c0_g1	-10.0308	2.02e-15	1.41e-13	DOWN	TRINITY_DN219260_c0_g1	TraesCS3D01G001400.1	1386	1476	1476	6.19e-41	TraesCS3D01G001400	chr3D	707880	709355	Glycosyltransferase
	TRINITY_DN115285_c0_g1	-10.03	1.18e-17	1.14e-15	DOWN	TRINITY_DN115285_c0_g1	TraesCS7B01G434500.1	981	1225	1227	7.52e-110	TraesCS7B01G434500	chr7B	701637339	701641406	Formamidopyrimidine-DNA glycosylase
	TRINITY_DN65878_c0_g1	-10.0292	9.75e-18	9.51e-16	DOWN	TRINITY_DN65878_c0_g1	TraesCS2A01G514400.1	392	632	1926	1.93e-109	TraesCS2A01G514400	chr2A	738985913	738989990	RING/U-box superfamily protein
	TRINITY_DN31037_c0_g1	-10.0291	4.39e-17	3.89e-15	DOWN	TRINITY_DN31037_c0_g1	TraesCS7D01G362100.1	1173	1251	1251	1.7e-32	TraesCS7D01G362100	chr7D	465165499	465167563	Zinc transporter
	TRINITY_DN135593_c1_g1	-10.0282	1.82e-17	1.71e-15	DOWN	NA	NA	NA	NA	NA	NA	NA	NA	NA	NA	NA
	TRINITY_DN49096_c0_g1	-10.0259	7.01e-16	5.23e-14	DOWN	TRINITY_DN49096_c0_g1	TraesCS2D01G515800.1	1093	1356	1461	9.99e-113	TraesCS2D01G515800	chr2D	606752894	606755679	AP2-like ethylene-responsive transcription factor
	TRINITY_DN19995_c0_g1	-10.0236	1.1e-17	1.07e-15	DOWN	NA	NA	NA	NA	NA	NA	NA	NA	NA	NA	NA
	TRINITY_DN224095_c0_g1	-10.0221	2.43e-16	1.95e-14	DOWN	TRINITY_DN224095_c0_g1	TraesCS3A01G245000.1	615	709	3372	7.21e-38	TraesCS3A01G245000	chr3A	458679119	458682490	Receptor kinase
	TRINITY_DN57545_c0_g1	-10.0206	9.99e-18	9.72e-16	DOWN	TRINITY_DN57545_c0_g1	TraesCS3B01G529500.1	672	726	726	8.29e-21	TraesCS3B01G529500	chr3B	771121420	771122318	HAT transposon superfamily
	TRINITY_DN33082_c0_g1	-10.019	2.47e-15	1.7e-13	DOWN	TRINITY_DN33082_c0_g1	TraesCS6B01G370300.1	723	985	2343	1.25e-121	TraesCS6B01G370300	chr6B	643896917	643899259	Subtilisin protease
	TRINITY_DN157646_c0_g1	-10.0136	1.71e-17	1.61e-15	DOWN	NA	NA	NA	NA	NA	NA	NA	NA	NA	NA	NA
	TRINITY_DN2764_c1_g1	-10.01	3.86e-10	1.19e-08	DOWN	TRINITY_DN2764_c1_g1	TraesCS2A01G014800.1	919	1125	1185	1.27e-105	TraesCS2A01G014800	chr2A	5910946	5912235	Chalcone synthase
	TRINITY_DN35895_c0_g2	-10.0071	1.79e-15	1.26e-13	DOWN	TRINITY_DN35895_c0_g2	TraesCS6D01G050300.1	204	525	684	5.56e-131	TraesCS6D01G050300	chr6D	24261731	24262692	AT hook motif DNA-binding family protein
	TRINITY_DN34269_c0_g1	-10.0046	2.92e-16	2.3e-14	DOWN	NA	NA	NA	NA	NA	NA	NA	NA	NA	NA	NA
	TRINITY_DN41557_c0_g1	-10.0034	4.51e-13	2.17e-11	DOWN	NA	NA	NA	NA	NA	NA	NA	NA	NA	NA	NA
	TRINITY_DN19684_c0_g1	-10.0026	5.07e-17	4.45e-15	DOWN	TRINITY_DN19684_c0_g1	TraesCS7A01G339900.1	504	688	1545	2.9e-53	TraesCS7A01G339900	chr7A	498229025	498230897	Cytochrome P450 family protein
	TRINITY_DN4628_c4_g1	-9.997	7.51e-16	5.56e-14	DOWN	NA	NA	NA	NA	NA	NA	NA	NA	NA	NA	NA
	TRINITY_DN34768_c0_g1	-9.99547	5.82e-11	2.02e-09	DOWN	NA	NA	NA	NA	NA	NA	NA	NA	NA	NA	NA
	TRINITY_DN48956_c0_g1	-9.99441	1.48e-16	1.22e-14	DOWN	TRINITY_DN48956_c0_g1	TraesCS7D01G509500.1	643	690	690	4.03e-17	TraesCS7D01G509500	chr7D	612930055	612932021	Actin-related protein 2/3 complex subunit 3
	TRINITY_DN14015_c1_g1	-9.99388	9.86e-17	8.35e-15	DOWN	TRINITY_DN14015_c1_g1	TraesCS6A01G406900.1	930	1172	1479	6.86e-124	TraesCS6A01G406900	chr6A	612107354	612109520	F-box family protein
	TRINITY_DN102969_c0_g1	-9.99318	4.53e-14	2.54e-12	DOWN	TRINITY_DN102969_c0_g1	TraesCS2A01G007000.1	2705	3059	4263	0	TraesCS2A01G007000	chr2A	2986007	2990362	Disease resistance protein (NBS-LRR class) family
	TRINITY_DN8285_c5_g1	-9.99282	1.61e-17	1.53e-15	DOWN	NA	NA	NA	NA	NA	NA	NA	NA	NA	NA	NA
	TRINITY_DN26359_c0_g1	-9.9925	3.84e-13	1.87e-11	DOWN	TRINITY_DN26359_c0_g1	TraesCS2A01G564000.1	780	1047	1590	9.72e-138	TraesCS2A01G564000	chr2A	764321984	764324786	E3 ubiquitin-protein ligase
	TRINITY_DN54857_c0_g5	-9.98955	2.62e-17	2.41e-15	DOWN	NA	NA	NA	NA	NA	NA	NA	NA	NA	NA	NA
	TRINITY_DN33560_c0_g1	-9.98728	2.88e-17	2.63e-15	DOWN	TRINITY_DN33560_c0_g1	TraesCS7D01G403700.1	912	1212	1746	2.38e-134	TraesCS7D01G403700	chr7D	520827789	520832026	Mitogen-activated protein kinase
	TRINITY_DN30085_c0_g2	-9.98255	2.4e-17	2.22e-15	DOWN	NA	NA	NA	NA	NA	NA	NA	NA	NA	NA	NA
	TRINITY_DN109934_c0_g1	-9.98027	4.11e-17	3.67e-15	DOWN	NA	NA	NA	NA	NA	NA	NA	NA	NA	NA	NA
	TRINITY_DN18541_c0_g1	-9.97593	5.73e-15	3.71e-13	DOWN	NA	NA	NA	NA	NA	NA	NA	NA	NA	NA	NA
	TRINITY_DN34808_c0_g1	-9.97206	1.8e-15	1.27e-13	DOWN	TRINITY_DN34808_c0_g1	TraesCS7A01G180200.1	289	552	552	1.49e-133	TraesCS7A01G180200	chr7A	134549450	134550707	E3 ubiquitin-protein ligase
	TRINITY_DN79042_c0_g2	-9.96909	2.9e-07	5.73e-06	DOWN	NA	NA	NA	NA	NA	NA	NA	NA	NA	NA	NA
[truncated: 5,416 more rows]

## Sheet: GO Analysis_Upregulated
	Insight into the mechanisms of terminal HS-tolerance in wheat mutant with improved nutritional quality through de novo transcriptome sequencing Ranjeet R. Kumar, Suman Bakshi, Kavita Dubey, Sumedha Hasija, Gyanendra K. Rai, Neelu Jain, Sanjay Jambhulkar, Bhupinder Singh, Gyanendra P. Singh, & Shelly Praveen
[truncated: 4,423 more rows]

[truncated: 1 more sheets: GO Analysis-Downregulated]
