# Supplementary material for: Insight into the mechanisms of terminal HS-tolerance in wheat mutant with improved nutritional quality through de novo transcriptome sequencing
Source: Research Square preprint supplement (doi:10.21203/rs.3.rs-241832/v1), 2021-02-26
Supplement: Supplementary file 11 [file b461eeb474d79a64e9b23929.xlsx]

## Sheet: NGS_P6252_Annotation
	Manuscript title: Insight into the mechanisms of terminal HS-tolerance in wheat mutant with improved nutritional quality through de novo transcriptome sequencing Author’s List: Ranjeet R. Kumar, Suman Bakshi, Kavita Dubey, Sumedha Hasija, Gyanendra K. Rai, Neelu Jain, Sanjay Jambhulkar, Bhupinder Singh, Gyanendra P. Singh, & Shelly Praveen
Table S4A List of annotated transcripts identified from the de novo transcriptome sequencing of wheat mutant (M3), parent (P3) and mutant under heat stress (M3H) and their Gene Ontology analysis for characterizing the associated pathways
qseqid	sseqid	length	evalue	bitscore	qcovhsp	gene_description	name	protein_name	description
TRINITY_DN69561_c0_g1_i6	tr|A0A1D5WRM7|A0A1D5WRM7_WHEAT	36	1.4e-05	58.5	21.6		A0A1D5WRM7_WHEAT	Uncharacterized protein	SubName: Full=Uncharacterized protein {ECO:0000313|EnsemblPlants:TRIAE_CS42_3DS_TGACv1_271823_AA0908710.2};
TRINITY_DN69561_c0_g1_i5	tr|A0A1D5WRM7|A0A1D5WRM7_WHEAT	36	1.8e-05	58.5	16.4		A0A1D5WRM7_WHEAT	Uncharacterized protein	SubName: Full=Uncharacterized protein {ECO:0000313|EnsemblPlants:TRIAE_CS42_3DS_TGACv1_271823_AA0908710.2};
TRINITY_DN69561_c1_g1_i1	tr|A0A1D6BYW6|A0A1D6BYW6_WHEAT	85	7.4e-11	75.1	96.2		A0A1D6BYW6_WHEAT	Uncharacterized protein	SubName: Full=Uncharacterized protein {ECO:0000313|EnsemblPlants:TRIAE_CS42_7AS_TGACv1_570747_AA1840420.1};
TRINITY_DN69561_c1_g2_i1	tr|A0A1D5RU38|A0A1D5RU38_WHEAT	85	1.2e-23	117.9	83.9		A0A1D5RU38_WHEAT	Uncharacterized protein	SubName: Full=Uncharacterized protein {ECO:0000313|EnsemblPlants:TRIAE_CS42_1AL_TGACv1_001207_AA0026950.1};
TRINITY_DN69511_c0_g1_i3	tr|A0A1D6A323|A0A1D6A323_WHEAT	42	1.4e-05	57.4	56.5		A0A1D6A323_WHEAT	Uncharacterized protein	SubName: Full=Uncharacterized protein {ECO:0000313|EnsemblPlants:TRIAE_CS42_5DS_TGACv1_457424_AA1486370.4};
TRINITY_DN69511_c0_g1_i4	tr|A0A1D6A323|A0A1D6A323_WHEAT	43	2.2e-05	56.6	61.1		A0A1D6A323_WHEAT	Uncharacterized protein	SubName: Full=Uncharacterized protein {ECO:0000313|EnsemblPlants:TRIAE_CS42_5DS_TGACv1_457424_AA1486370.4};
TRINITY_DN69511_c0_g1_i1	tr|A0A1D6A323|A0A1D6A323_WHEAT	42	1.9e-05	57	54.1		A0A1D6A323_WHEAT	Uncharacterized protein	SubName: Full=Uncharacterized protein {ECO:0000313|EnsemblPlants:TRIAE_CS42_5DS_TGACv1_457424_AA1486370.4};
TRINITY_DN69511_c0_g1_i2	tr|A0A1D6A323|A0A1D6A323_WHEAT	48	1.5e-05	57.4	60.5		A0A1D6A323_WHEAT	Uncharacterized protein	SubName: Full=Uncharacterized protein {ECO:0000313|EnsemblPlants:TRIAE_CS42_5DS_TGACv1_457424_AA1486370.4};
TRINITY_DN69511_c0_g2_i1	tr|A0A1D6C2I3|A0A1D6C2I3_WHEAT	33	5e-05	56.2	26.8		A0A1D6C2I3_WHEAT	Uncharacterized protein	SubName: Full=Uncharacterized protein {ECO:0000313|EnsemblPlants:TRIAE_CS42_7BL_TGACv1_576885_AA1858580.1};
TRINITY_DN69569_c0_g1_i1	tr|W5FJR5|W5FJR5_WHEAT	108	1.8e-54	220.3	99.4		W5FJR5_WHEAT	Uncharacterized protein	SubName: Full=Uncharacterized protein {ECO:0000313|EnsemblPlants:TRIAE_CS42_5BL_TGACv1_407702_AA1358990.1};
TRINITY_DN69569_c0_g2_i2	tr|A0A1D5X0L1|A0A1D5X0L1_WHEAT	60	4.3e-26	125.9	58.1		A0A1D5X0L1_WHEAT	Uncharacterized protein	SubName: Full=Uncharacterized protein {ECO:0000313|EnsemblPlants:TRIAE_CS42_4AL_TGACv1_288675_AA0955330.1};
TRINITY_DN69569_c0_g2_i1	tr|A0A1D5X0L1|A0A1D5X0L1_WHEAT	60	3.7e-26	125.9	68.2		A0A1D5X0L1_WHEAT	Uncharacterized protein	SubName: Full=Uncharacterized protein {ECO:0000313|EnsemblPlants:TRIAE_CS42_4AL_TGACv1_288675_AA0955330.1};
TRINITY_DN69500_c0_g1_i1	tr|A0A1D6B9X4|A0A1D6B9X4_WHEAT	90	1.1e-41	177.6	99.3		A0A1D6B9X4_WHEAT	Uncharacterized protein	SubName: Full=Uncharacterized protein {ECO:0000313|EnsemblPlants:TRIAE_CS42_6DL_TGACv1_528268_AA1712940.5};
TRINITY_DN69500_c0_g1_i2	tr|A0A1D6AST1|A0A1D6AST1_WHEAT	81	1.5e-37	163.7	99.6		A0A1D6AST1_WHEAT	Uncharacterized protein	SubName: Full=Uncharacterized protein {ECO:0000313|EnsemblPlants:TRIAE_CS42_6BL_TGACv1_501684_AA1619880.1};
TRINITY_DN69542_c0_g1_i3	tr|A0A1D5UBM2|A0A1D5UBM2_WHEAT	58	1.4e-24	122.9	14.3		A0A1D5UBM2_WHEAT	Uncharacterized protein	SubName: Full=Uncharacterized protein {ECO:0000313|EnsemblPlants:TRIAE_CS42_2BS_TGACv1_146892_AA0474970.2};
TRINITY_DN69542_c0_g1_i1	tr|A0A1D5UBM2|A0A1D5UBM2_WHEAT	49	5.9e-20	107.5	12.8		A0A1D5UBM2_WHEAT	Uncharacterized protein	SubName: Full=Uncharacterized protein {ECO:0000313|EnsemblPlants:TRIAE_CS42_2BS_TGACv1_146892_AA0474970.2};
TRINITY_DN69542_c0_g1_i6	tr|A0A1D5UBM2|A0A1D5UBM2_WHEAT	58	1.4e-24	122.9	14.4		A0A1D5UBM2_WHEAT	Uncharacterized protein	SubName: Full=Uncharacterized protein {ECO:0000313|EnsemblPlants:TRIAE_CS42_2BS_TGACv1_146892_AA0474970.2};
TRINITY_DN69542_c0_g1_i2	tr|A0A1D5UBM2|A0A1D5UBM2_WHEAT	49	6.3e-18	100.1	19.4		A0A1D5UBM2_WHEAT	Uncharacterized protein	SubName: Full=Uncharacterized protein {ECO:0000313|EnsemblPlants:TRIAE_CS42_2BS_TGACv1_146892_AA0474970.2};
TRINITY_DN69542_c0_g1_i5	tr|A0A1D5UBM2|A0A1D5UBM2_WHEAT	58	1.4e-24	122.9	14.8		A0A1D5UBM2_WHEAT	Uncharacterized protein	SubName: Full=Uncharacterized protein {ECO:0000313|EnsemblPlants:TRIAE_CS42_2BS_TGACv1_146892_AA0474970.2};
TRINITY_DN69554_c0_g1_i2	tr|W5ERH8|W5ERH8_WHEAT	85	8e-10	71.6	99.2		W5ERH8_WHEAT	Uncharacterized protein	SubName: Full=Uncharacterized protein {ECO:0000313|EnsemblPlants:TRIAE_CS42_4DS_TGACv1_362166_AA1177350.6};
TRINITY_DN69507_c0_g1_i1	tr|A0A1D5TW40|A0A1D5TW40_WHEAT	157	7.5e-70	271.9	99.6		A0A1D5TW40_WHEAT	Uncharacterized protein	SubName: Full=Uncharacterized protein {ECO:0000313|EnsemblPlants:TRIAE_CS42_2BL_TGACv1_129705_AA0393260.1};
TRINITY_DN69589_c0_g1_i3	tr|D8L9K1|D8L9K1_WHEAT	173	4.8e-52	214.5	29.7	ORFNames=TAA_ctg0382b.00120.1 {ECO:0000313|EMBL:CBH32554.1};	D8L9K1_WHEAT	Similar to No apical meristem	SubName: Full=Similar to No apical meristem {ECO:0000313|EMBL:CBH32554.1}; Flags: Fragment;
TRINITY_DN69589_c0_g1_i1	tr|D8L9K1|D8L9K1_WHEAT	117	5.3e-56	227.3	29.6	ORFNames=TAA_ctg0382b.00120.1 {ECO:0000313|EMBL:CBH32554.1};	D8L9K1_WHEAT	Similar to No apical meristem	SubName: Full=Similar to No apical meristem {ECO:0000313|EMBL:CBH32554.1}; Flags: Fragment;
TRINITY_DN69589_c0_g1_i6	tr|K3XI05|K3XI05_SETIT	140	5.8e-44	186.4	60.7	Name=LOC101755562 {ECO:0000313|EnsemblPlants:Si001527m}; ORFNames=SETIT_001527mg {ECO:0000313|EMBL:KQL04788.1};	K3XI05_SETIT	Uncharacterized protein	SubName: Full=Uncharacterized protein {ECO:0000313|EMBL:KQL04788.1, ECO:0000313|EnsemblPlants:Si001527m};
TRINITY_DN69589_c0_g1_i7	tr|D8L9M6|D8L9M6_WHEAT	82	1.9e-36	160.2	85.4	ORFNames=TAA_ctg0464b.00220.1 {ECO:0000313|EMBL:CBH32580.1};	D8L9M6_WHEAT	Chromosome 3B-specific BAC library, contig ctg0464b	SubName: Full=Chromosome 3B-specific BAC library, contig ctg0464b {ECO:0000313|EMBL:CBH32580.1};
TRINITY_DN69589_c0_g1_i5	tr|D8L9K1|D8L9K1_WHEAT	173	3.5e-52	214.5	40.3	ORFNames=TAA_ctg0382b.00120.1 {ECO:0000313|EMBL:CBH32554.1};	D8L9K1_WHEAT	Similar to No apical meristem	SubName: Full=Similar to No apical meristem {ECO:0000313|EMBL:CBH32554.1}; Flags: Fragment;
TRINITY_DN69589_c0_g1_i4	tr|A0A1D6MHR9|A0A1D6MHR9_MAIZE	175	6.7e-58	233.4	47.8	ORFNames=ZEAMMB73_Zm00001d039506 {ECO:0000313|EMBL:ONM28981.1};	A0A1D6MHR9_MAIZE	NAC domain containing protein 75	SubName: Full=NAC domain containing protein 75 {ECO:0000313|EMBL:ONM28981.1};
TRINITY_DN69589_c0_g1_i2	tr|A0A1D6MHR9|A0A1D6MHR9_MAIZE	179	5.3e-55	223.8	48.9	ORFNames=ZEAMMB73_Zm00001d039506 {ECO:0000313|EMBL:ONM28981.1};	A0A1D6MHR9_MAIZE	NAC domain containing protein 75	SubName: Full=NAC domain containing protein 75 {ECO:0000313|EMBL:ONM28981.1};
TRINITY_DN69589_c0_g2_i1	tr|D8L9K1|D8L9K1_WHEAT	53	2.5e-16	94	37.7	ORFNames=TAA_ctg0382b.00120.1 {ECO:0000313|EMBL:CBH32554.1};	D8L9K1_WHEAT	Similar to No apical meristem	SubName: Full=Similar to No apical meristem {ECO:0000313|EMBL:CBH32554.1}; Flags: Fragment;
TRINITY_DN69557_c0_g1_i1	tr|A0A1D6C866|A0A1D6C866_WHEAT	85	3e-33	149.4	99.6		A0A1D6C866_WHEAT	Uncharacterized protein	SubName: Full=Uncharacterized protein {ECO:0000313|EnsemblPlants:TRIAE_CS42_7BL_TGACv1_578230_AA1891470.1};
TRINITY_DN69539_c0_g1_i2	tr|I1IGW6|I1IGW6_BRADI	36	3.5e-06	59.3	49.3		I1IGW6_BRADI	Uncharacterized protein	SubName: Full=Uncharacterized protein {ECO:0000313|EnsemblPlants:BRADI4G02910.1};
TRINITY_DN69539_c0_g1_i1	tr|I1IGW6|I1IGW6_BRADI	56	2.2e-08	66.6	78.5		I1IGW6_BRADI	Uncharacterized protein	SubName: Full=Uncharacterized protein {ECO:0000313|EnsemblPlants:BRADI4G02910.1};
TRINITY_DN69537_c0_g1_i1	tr|M8C6G6|M8C6G6_AEGTA	102	2.6e-47	196.4	99.4	ORFNames=F775_00726 {ECO:0000313|EMBL:EMT22622.1};	M8C6G6_AEGTA	Dirigent protein	RecName: Full=Dirigent protein {ECO:0000256|RuleBase:RU363099};
TRINITY_DN69522_c0_g1_i4	tr|A0A1D5V1D9|A0A1D5V1D9_WHEAT	223	6.7e-120	439.5	57.7		A0A1D5V1D9_WHEAT	Uncharacterized protein	SubName: Full=Uncharacterized protein {ECO:0000313|EnsemblPlants:TRIAE_CS42_2DS_TGACv1_178700_AA0599950.1};
TRINITY_DN69522_c0_g1_i3	tr|A0A1D5V1D9|A0A1D5V1D9_WHEAT	223	3.1e-122	447.2	59.3		A0A1D5V1D9_WHEAT	Uncharacterized protein	SubName: Full=Uncharacterized protein {ECO:0000313|EnsemblPlants:TRIAE_CS42_2DS_TGACv1_178700_AA0599950.1};
TRINITY_DN69522_c0_g1_i6	tr|A0A1D5V1D9|A0A1D5V1D9_WHEAT	223	2.7e-119	437.6	54.2		A0A1D5V1D9_WHEAT	Uncharacterized protein	SubName: Full=Uncharacterized protein {ECO:0000313|EnsemblPlants:TRIAE_CS42_2DS_TGACv1_178700_AA0599950.1};
TRINITY_DN69522_c0_g1_i1	tr|A0A1D5V1D9|A0A1D5V1D9_WHEAT	223	1.2e-121	445.3	57.6		A0A1D5V1D9_WHEAT	Uncharacterized protein	SubName: Full=Uncharacterized protein {ECO:0000313|EnsemblPlants:TRIAE_CS42_2DS_TGACv1_178700_AA0599950.1};
TRINITY_DN69522_c0_g1_i2	tr|A0A1D5V1D9|A0A1D5V1D9_WHEAT	223	1.3e-121	445.3	55.6		A0A1D5V1D9_WHEAT	Uncharacterized protein	SubName: Full=Uncharacterized protein {ECO:0000313|EnsemblPlants:TRIAE_CS42_2DS_TGACv1_178700_AA0599950.1};
TRINITY_DN69532_c0_g1_i1	tr|A0A287I938|A0A287I938_HORVV	38	0.00028	53.5	36.4		A0A287I938_HORVV	Uncharacterized protein	SubName: Full=Uncharacterized protein {ECO:0000313|EnsemblPlants:HORVU2Hr1G065960.15};
TRINITY_DN69551_c0_g1_i1	tr|A0A1D5T5K1|A0A1D5T5K1_WHEAT	98	3.4e-52	212.6	99.7		A0A1D5T5K1_WHEAT	Uncharacterized protein	SubName: Full=Uncharacterized protein {ECO:0000313|EnsemblPlants:TRIAE_CS42_2AL_TGACv1_092909_AA0266780.2};
TRINITY_DN69515_c0_g1_i1	tr|A0A1D5RWD4|A0A1D5RWD4_WHEAT	216	1.2e-96	362.1	61.8		A0A1D5RWD4_WHEAT	Uncharacterized protein	SubName: Full=Uncharacterized protein {ECO:0000313|EnsemblPlants:TRIAE_CS42_1AL_TGACv1_001887_AA0036290.1};
TRINITY_DN69544_c0_g1_i1	tr|N1QU06|N1QU06_AEGTA	68	2.2e-13	83.2	98.6	ORFNames=F775_12304 {ECO:0000313|EMBL:EMT01588.1};	N1QU06_AEGTA	Proteasome subunit beta type-5-A	SubName: Full=Proteasome subunit beta type-5-A {ECO:0000313|EMBL:EMT01588.1, ECO:0000313|EnsemblPlants:EMT01588};
TRINITY_DN69587_c0_g1_i1	tr|A0A1D6CNQ1|A0A1D6CNQ1_WHEAT	85	2.2e-39	169.9	99.2		A0A1D6CNQ1_WHEAT	Uncharacterized protein	SubName: Full=Uncharacterized protein {ECO:0000313|EnsemblPlants:TRIAE_CS42_7DL_TGACv1_603101_AA1975920.1};
TRINITY_DN69577_c0_g1_i2	tr|A0A287NI64|A0A287NI64_HORVV	101	9.7e-21	108.6	68		A0A287NI64_HORVV	Peroxidase	SubName: Full=Peroxidase {ECO:0000313|EnsemblPlants:HORVU4Hr1G022270.3};
TRINITY_DN69577_c0_g1_i7	tr|A0A287NIJ1|A0A287NIJ1_HORVV	58	7.1e-18	98.6	58.6		A0A287NIJ1_HORVV	Peroxidase	SubName: Full=Peroxidase {ECO:0000313|EnsemblPlants:HORVU4Hr1G022270.5};
TRINITY_DN69577_c0_g1_i5	tr|A0A287NIJ1|A0A287NIJ1_HORVV	100	4.7e-33	149.1	99.3		A0A287NIJ1_HORVV	Peroxidase	SubName: Full=Peroxidase {ECO:0000313|EnsemblPlants:HORVU4Hr1G022270.5};
TRINITY_DN69577_c0_g1_i6	tr|A0A287NIJ1|A0A287NIJ1_HORVV	81	5.1e-22	112.1	99.2		A0A287NIJ1_HORVV	Peroxidase	SubName: Full=Peroxidase {ECO:0000313|EnsemblPlants:HORVU4Hr1G022270.5};
TRINITY_DN69577_c0_g1_i3	tr|A0A287NIJ1|A0A287NIJ1_HORVV	80	6.2e-19	102.1	72.6		A0A287NIJ1_HORVV	Peroxidase	SubName: Full=Peroxidase {ECO:0000313|EnsemblPlants:HORVU4Hr1G022270.5};
TRINITY_DN69577_c0_g1_i4	tr|W5DS97|W5DS97_WHEAT	76	2.3e-31	144.1	48.2		W5DS97_WHEAT	Peroxidase	RecName: Full=Peroxidase {ECO:0000256|RuleBase:RU362060, ECO:0000256|SAAS:SAAS00709852}; EC=1.11.1.7 {ECO:0000256|RuleBase:RU362060, ECO:0000256|SAAS:SAAS00709852};
TRINITY_DN69547_c0_g1_i2	tr|A0A1D6C6S3|A0A1D6C6S3_WHEAT	84	1.1e-40	174.1	99.2		A0A1D6C6S3_WHEAT	Uncharacterized protein	SubName: Full=Uncharacterized protein {ECO:0000313|EnsemblPlants:TRIAE_CS42_7BL_TGACv1_577757_AA1882710.1};
TRINITY_DN69547_c0_g1_i1	tr|A0A287X5Q2|A0A287X5Q2_HORVV	67	5.5e-19	102.4	60.4		A0A287X5Q2_HORVV	Uncharacterized protein	SubName: Full=Uncharacterized protein {ECO:0000313|EnsemblPlants:HORVU7Hr1G085120.12};
TRINITY_DN69571_c0_g1_i1	tr|A0A1D5TC24|A0A1D5TC24_WHEAT	77	8.8e-40	171	99.6		A0A1D5TC24_WHEAT	Uncharacterized protein	SubName: Full=Uncharacterized protein {ECO:0000313|EnsemblPlants:TRIAE_CS42_2AL_TGACv1_094557_AA0299610.5};
TRINITY_DN69571_c0_g1_i4	tr|A0A1D5TC24|A0A1D5TC24_WHEAT	57	4e-25	124.4	17.4		A0A1D5TC24_WHEAT	Uncharacterized protein	SubName: Full=Uncharacterized protein {ECO:0000313|EnsemblPlants:TRIAE_CS42_2AL_TGACv1_094557_AA0299610.5};
TRINITY_DN69571_c0_g1_i2	tr|A0A1D5TC24|A0A1D5TC24_WHEAT	57	1.3e-25	124.4	54.1		A0A1D5TC24_WHEAT	Uncharacterized protein	SubName: Full=Uncharacterized protein {ECO:0000313|EnsemblPlants:TRIAE_CS42_2AL_TGACv1_094557_AA0299610.5};
TRINITY_DN69571_c0_g1_i3	tr|A0A1D5TC24|A0A1D5TC24_WHEAT	41	1.8e-13	85.9	10.9		A0A1D5TC24_WHEAT	Uncharacterized protein	SubName: Full=Uncharacterized protein {ECO:0000313|EnsemblPlants:TRIAE_CS42_2AL_TGACv1_094557_AA0299610.5};
TRINITY_DN69525_c0_g1_i1	tr|A0A0G4GSE1|A0A0G4GSE1_9ALVE	185	5.9e-59	236.1	83.3	ORFNames=Cvel_5138 {ECO:0000313|EMBL:CEM33527.1};	A0A0G4GSE1_9ALVE	Uncharacterized protein	SubName: Full=Uncharacterized protein {ECO:0000313|EMBL:CEM33527.1};
TRINITY_DN69591_c0_g1_i3	tr|A0A1D6D534|A0A1D6D534_WHEAT	77	3.1e-32	146	98.7		A0A1D6D534_WHEAT	Uncharacterized protein	SubName: Full=Uncharacterized protein {ECO:0000313|EnsemblPlants:TRIAE_CS42_7DS_TGACv1_624334_AA2060590.1};
TRINITY_DN69591_c0_g1_i1	tr|A0A1D6CDD5|A0A1D6CDD5_WHEAT	77	2.6e-31	142.9	98.7		A0A1D6CDD5_WHEAT	Uncharacterized protein	SubName: Full=Uncharacterized protein {ECO:0000313|EnsemblPlants:TRIAE_CS42_7BS_TGACv1_591779_AA1920700.1};
TRINITY_DN69591_c0_g1_i4	tr|A0A1D6D534|A0A1D6D534_WHEAT	66	5.3e-25	121.7	98		A0A1D6D534_WHEAT	Uncharacterized protein	SubName: Full=Uncharacterized protein {ECO:0000313|EnsemblPlants:TRIAE_CS42_7DS_TGACv1_624334_AA2060590.1};
TRINITY_DN69591_c0_g1_i2	tr|A0A1D6D534|A0A1D6D534_WHEAT	77	4.9e-30	138.7	98.7		A0A1D6D534_WHEAT	Uncharacterized protein	SubName: Full=Uncharacterized protein {ECO:0000313|EnsemblPlants:TRIAE_CS42_7DS_TGACv1_624334_AA2060590.1};
TRINITY_DN69572_c0_g1_i2	tr|A0A1D6AFW8|A0A1D6AFW8_WHEAT	201	4.7e-93	349.4	99.7		A0A1D6AFW8_WHEAT	Uncharacterized protein	SubName: Full=Uncharacterized protein {ECO:0000313|EnsemblPlants:TRIAE_CS42_6AS_TGACv1_485846_AA1553270.1};
TRINITY_DN69572_c0_g1_i1	tr|A0A1D6AZ70|A0A1D6AZ70_WHEAT	195	3.6e-90	339.7	99.7		A0A1D6AZ70_WHEAT	Uncharacterized protein	SubName: Full=Uncharacterized protein {ECO:0000313|EnsemblPlants:TRIAE_CS42_6BS_TGACv1_514390_AA1659180.1};
TRINITY_DN69572_c0_g2_i1	tr|R7W365|R7W365_AEGTA	86	3.8e-39	169.1	98.1	ORFNames=F775_15210 {ECO:0000313|EMBL:EMT01927.1};	R7W365_AEGTA	Uncharacterized protein	SubName: Full=Uncharacterized protein {ECO:0000313|EMBL:EMT01927.1, ECO:0000313|EnsemblPlants:EMT01927};
TRINITY_DN69590_c0_g1_i1	tr|M8BJI9|M8BJI9_AEGTA	79	2.1e-28	133.3	98.3	ORFNames=F775_32974 {ECO:0000313|EMBL:EMT25175.1};	M8BJI9_AEGTA	Uncharacterized protein	SubName: Full=Uncharacterized protein {ECO:0000313|EMBL:EMT25175.1, ECO:0000313|EnsemblPlants:EMT25175};
TRINITY_DN69552_c0_g1_i2	tr|M8BQM1|M8BQM1_AEGTA	38	3.7e-10	72.4	56.2	ORFNames=F775_01636 {ECO:0000313|EMBL:EMT09089.1};	M8BQM1_AEGTA	Uncharacterized protein	SubName: Full=Uncharacterized protein {ECO:0000313|EMBL:EMT09089.1, ECO:0000313|EnsemblPlants:EMT09089};
TRINITY_DN69552_c0_g1_i1	tr|M8BH72|M8BH72_AEGTA	24	0.00015	54.3	24.2	ORFNames=F775_10473 {ECO:0000313|EMBL:EMT21098.1};	M8BH72_AEGTA	Uncharacterized protein	SubName: Full=Uncharacterized protein {ECO:0000313|EMBL:EMT21098.1, ECO:0000313|EnsemblPlants:EMT21098};
TRINITY_DN69552_c0_g1_i6	tr|A0A287X4V9|A0A287X4V9_HORVV	42	1.3e-06	61.6	31		A0A287X4V9_HORVV	Uncharacterized protein	SubName: Full=Uncharacterized protein {ECO:0000313|EnsemblPlants:HORVU7Hr1G084070.1};
TRINITY_DN69552_c0_g1_i3	tr|M8BQM1|M8BQM1_AEGTA	38	9.6e-07	62	29.3	ORFNames=F775_01636 {ECO:0000313|EMBL:EMT09089.1};	M8BQM1_AEGTA	Uncharacterized protein	SubName: Full=Uncharacterized protein {ECO:0000313|EMBL:EMT09089.1, ECO:0000313|EnsemblPlants:EMT09089};
TRINITY_DN69552_c0_g1_i7	tr|M8BQM1|M8BQM1_AEGTA	38	2.4e-08	67.4	28	ORFNames=F775_01636 {ECO:0000313|EMBL:EMT09089.1};	M8BQM1_AEGTA	Uncharacterized protein	SubName: Full=Uncharacterized protein {ECO:0000313|EMBL:EMT09089.1, ECO:0000313|EnsemblPlants:EMT09089};
TRINITY_DN69552_c0_g1_i4	tr|M8BQM1|M8BQM1_AEGTA	38	1.6e-06	61.2	29.3	ORFNames=F775_01636 {ECO:0000313|EMBL:EMT09089.1};	M8BQM1_AEGTA	Uncharacterized protein	SubName: Full=Uncharacterized protein {ECO:0000313|EMBL:EMT09089.1, ECO:0000313|EnsemblPlants:EMT09089};
TRINITY_DN69552_c1_g1_i3	tr|M8BQM1|M8BQM1_AEGTA	37	5.6e-09	68.9	39.9	ORFNames=F775_01636 {ECO:0000313|EMBL:EMT09089.1};	M8BQM1_AEGTA	Uncharacterized protein	SubName: Full=Uncharacterized protein {ECO:0000313|EMBL:EMT09089.1, ECO:0000313|EnsemblPlants:EMT09089};
TRINITY_DN69552_c1_g1_i2	tr|M8BQM1|M8BQM1_AEGTA	37	4.2e-09	69.3	41.1	ORFNames=F775_01636 {ECO:0000313|EMBL:EMT09089.1};	M8BQM1_AEGTA	Uncharacterized protein	SubName: Full=Uncharacterized protein {ECO:0000313|EMBL:EMT09089.1, ECO:0000313|EnsemblPlants:EMT09089};
TRINITY_DN69553_c0_g1_i2	tr|W2J6A8|W2J6A8_PHYPR	152	3.4e-35	157.1	76.5	ORFNames=L914_07657 {ECO:0000313|EMBL:ETM47660.1}, L915_07763 {ECO:0000313|EMBL:ETK87853.1}, L916_07693 {ECO:0000313|EMBL:ETL41272.1}, L917_07578 {ECO:0000313|EMBL:ETL94428.1};	W2J6A8_PHYPR	Uncharacterized protein	SubName: Full=Uncharacterized protein {ECO:0000313|EMBL:ETL41272.1};
TRINITY_DN69595_c0_g1_i1	tr|A0A287N3A2|A0A287N3A2_HORVV	79	8.3e-29	134.8	86.8		A0A287N3A2_HORVV	Uncharacterized protein	SubName: Full=Uncharacterized protein {ECO:0000313|EnsemblPlants:HORVU4Hr1G007450.5};
TRINITY_DN69595_c0_g1_i2	tr|A0A287N3A2|A0A287N3A2_HORVV	112	1.1e-44	188	90.3		A0A287N3A2_HORVV	Uncharacterized protein	SubName: Full=Uncharacterized protein {ECO:0000313|EnsemblPlants:HORVU4Hr1G007450.5};
TRINITY_DN69566_c0_g1_i1	tr|R7W626|R7W626_AEGTA	68	2.5e-20	107.5	41.9	ORFNames=F775_26526 {ECO:0000313|EMBL:EMT16431.1};	R7W626_AEGTA	Uncharacterized protein	SubName: Full=Uncharacterized protein {ECO:0000313|EMBL:EMT16431.1, ECO:0000313|EnsemblPlants:EMT16431};
TRINITY_DN69566_c0_g1_i2	tr|R7W626|R7W626_AEGTA	67	1e-18	102.1	41.6	ORFNames=F775_26526 {ECO:0000313|EMBL:EMT16431.1};	R7W626_AEGTA	Uncharacterized protein	SubName: Full=Uncharacterized protein {ECO:0000313|EMBL:EMT16431.1, ECO:0000313|EnsemblPlants:EMT16431};
TRINITY_DN69584_c0_g1_i1	tr|A0A1D6C4J6|A0A1D6C4J6_WHEAT	93	1.1e-44	187.6	98.9		A0A1D6C4J6_WHEAT	Uncharacterized protein	SubName: Full=Uncharacterized protein {ECO:0000313|EnsemblPlants:TRIAE_CS42_7BL_TGACv1_577274_AA1871020.1};
TRINITY_DN69584_c1_g1_i1	tr|A0A1D5ZEJ3|A0A1D5ZEJ3_WHEAT	114	1.4e-41	177.6	97.7		A0A1D5ZEJ3_WHEAT	Uncharacterized protein	SubName: Full=Uncharacterized protein {ECO:0000313|EnsemblPlants:TRIAE_CS42_5BS_TGACv1_423243_AA1372030.1};
TRINITY_DN69513_c0_g1_i7	tr|A0A1D5W1M4|A0A1D5W1M4_WHEAT	216	4.5e-111	411	31.4		A0A1D5W1M4_WHEAT	Uncharacterized protein	SubName: Full=Uncharacterized protein {ECO:0000313|EnsemblPlants:TRIAE_CS42_3B_TGACv1_223246_AA0778890.1};
TRINITY_DN69513_c0_g1_i1	tr|A0A1D5W1M4|A0A1D5W1M4_WHEAT	216	4e-111	411	35		A0A1D5W1M4_WHEAT	Uncharacterized protein	SubName: Full=Uncharacterized protein {ECO:0000313|EnsemblPlants:TRIAE_CS42_3B_TGACv1_223246_AA0778890.1};
TRINITY_DN69513_c0_g1_i9	tr|A0A1D5W1M4|A0A1D5W1M4_WHEAT	216	4e-111	411	35.3		A0A1D5W1M4_WHEAT	Uncharacterized protein	SubName: Full=Uncharacterized protein {ECO:0000313|EnsemblPlants:TRIAE_CS42_3B_TGACv1_223246_AA0778890.1};
TRINITY_DN69513_c0_g1_i5	tr|A0A1D5SMV0|A0A1D5SMV0_WHEAT	35	1.5e-11	78.6	17.6		A0A1D5SMV0_WHEAT	Uncharacterized protein	SubName: Full=Uncharacterized protein {ECO:0000313|EnsemblPlants:TRIAE_CS42_1BS_TGACv1_050618_AA0173950.1};
TRINITY_DN69513_c0_g1_i4	tr|A0A1D5W1M4|A0A1D5W1M4_WHEAT	216	4e-111	411	35.4		A0A1D5W1M4_WHEAT	Uncharacterized protein	SubName: Full=Uncharacterized protein {ECO:0000313|EnsemblPlants:TRIAE_CS42_3B_TGACv1_223246_AA0778890.1};
TRINITY_DN69534_c0_g1_i2	tr|A0A1D5V4V8|A0A1D5V4V8_WHEAT	84	7.4e-40	171.4	99.6		A0A1D5V4V8_WHEAT	Uncharacterized protein	SubName: Full=Uncharacterized protein {ECO:0000313|EnsemblPlants:TRIAE_CS42_3AL_TGACv1_193715_AA0618300.1};
TRINITY_DN69534_c0_g1_i1	tr|R7WGH3|R7WGH3_AEGTA	84	3.3e-40	172.6	99.6	ORFNames=F775_15258 {ECO:0000313|EMBL:EMT20289.1};	R7WGH3_AEGTA	Putative polyketide hydroxylase	SubName: Full=Putative polyketide hydroxylase {ECO:0000313|EMBL:EMT20289.1};
TRINITY_DN69580_c0_g1_i1	tr|W5H2I5|W5H2I5_WHEAT	103	4.3e-51	209.5	70.1		W5H2I5_WHEAT	Uncharacterized protein	SubName: Full=Uncharacterized protein {ECO:0000313|EnsemblPlants:TRIAE_CS42_6DS_TGACv1_543356_AA1738920.1};
TRINITY_DN69580_c0_g1_i2	tr|A0A287T3F7|A0A287T3F7_HORVV	77	6.1e-36	159.5	43.6		A0A287T3F7_HORVV	Uncharacterized protein	SubName: Full=Uncharacterized protein {ECO:0000313|EnsemblPlants:HORVU6Hr1G000090.1};
TRINITY_DN69580_c0_g2_i2	tr|M8BMD5|M8BMD5_AEGTA	105	2.7e-54	219.9	82.7	ORFNames=F775_13839 {ECO:0000313|EMBL:EMT07934.1};	M8BMD5_AEGTA	Uncharacterized protein	SubName: Full=Uncharacterized protein {ECO:0000313|EMBL:EMT07934.1, ECO:0000313|EnsemblPlants:EMT07934};
TRINITY_DN69580_c0_g2_i1	tr|A0A1D6BET9|A0A1D6BET9_WHEAT	105	6.1e-55	222.6	56.9		A0A1D6BET9_WHEAT	Uncharacterized protein	SubName: Full=Uncharacterized protein {ECO:0000313|EnsemblPlants:TRIAE_CS42_6DS_TGACv1_543356_AA1738880.1};
TRINITY_DN69505_c0_g2_i1	tr|W5AUH2|W5AUH2_WHEAT	169	2.2e-69	271.6	46.7		W5AUH2_WHEAT	Uncharacterized protein	SubName: Full=Uncharacterized protein {ECO:0000313|EnsemblPlants:TRIAE_CS42_2AL_TGACv1_093107_AA0272100.1};
TRINITY_DN69558_c1_g1_i4	tr|A0A1D5S0N2|A0A1D5S0N2_WHEAT	35	2.5e-05	57	33		A0A1D5S0N2_WHEAT	Uncharacterized protein	SubName: Full=Uncharacterized protein {ECO:0000313|EnsemblPlants:TRIAE_CS42_1AS_TGACv1_019005_AA0057800.1};
TRINITY_DN69558_c1_g1_i2	tr|A0A1D5S0N2|A0A1D5S0N2_WHEAT	35	6.9e-05	57	12.3		A0A1D5S0N2_WHEAT	Uncharacterized protein	SubName: Full=Uncharacterized protein {ECO:0000313|EnsemblPlants:TRIAE_CS42_1AS_TGACv1_019005_AA0057800.1};
TRINITY_DN69531_c0_g1_i1	tr|A0A1D6CFA0|A0A1D6CFA0_WHEAT	82	1.4e-07	63.9	96.8		A0A1D6CFA0_WHEAT	Uncharacterized protein	SubName: Full=Uncharacterized protein {ECO:0000313|EnsemblPlants:TRIAE_CS42_7BS_TGACv1_592157_AA1932040.1};
TRINITY_DN69509_c0_g1_i1	tr|A0A1D6S8P0|A0A1D6S8P0_WHEAT	73	4.4e-28	132.1	98.2		A0A1D6S8P0_WHEAT	Uncharacterized protein	SubName: Full=Uncharacterized protein {ECO:0000313|EnsemblPlants:TRIAE_CS42_6AS_TGACv1_486578_AA1562800.2};
TRINITY_DN69574_c0_g1_i1	tr|W5EPT4|W5EPT4_WHEAT	75	9.8e-36	157.5	99.1		W5EPT4_WHEAT	Uncharacterized protein	SubName: Full=Uncharacterized protein {ECO:0000313|EnsemblPlants:TRIAE_CS42_4DS_TGACv1_361408_AA1167470.1};
TRINITY_DN69574_c0_g1_i2	tr|W5EPT4|W5EPT4_WHEAT	90	9e-44	184.5	99.3		W5EPT4_WHEAT	Uncharacterized protein	SubName: Full=Uncharacterized protein {ECO:0000313|EnsemblPlants:TRIAE_CS42_4DS_TGACv1_361408_AA1167470.1};
TRINITY_DN69574_c0_g1_i3	tr|W5EPT4|W5EPT4_WHEAT	68	3.6e-29	135.6	99		W5EPT4_WHEAT	Uncharacterized protein	SubName: Full=Uncharacterized protein {ECO:0000313|EnsemblPlants:TRIAE_CS42_4DS_TGACv1_361408_AA1167470.1};
TRINITY_DN69574_c0_g2_i1	tr|A0A1D6AW69|A0A1D6AW69_WHEAT	78	1.1e-35	157.9	69.2		A0A1D6AW69_WHEAT	Uncharacterized protein	SubName: Full=Uncharacterized protein {ECO:0000313|EnsemblPlants:TRIAE_CS42_6BS_TGACv1_513436_AA1641560.1};
TRINITY_DN69574_c0_g3_i1	tr|A0A1D6AW69|A0A1D6AW69_WHEAT	81	8.2e-41	174.9	78.6		A0A1D6AW69_WHEAT	Uncharacterized protein	SubName: Full=Uncharacterized protein {ECO:0000313|EnsemblPlants:TRIAE_CS42_6BS_TGACv1_513436_AA1641560.1};
TRINITY_DN69574_c1_g1_i1	tr|A0A1D6BN20|A0A1D6BN20_WHEAT	75	2e-08	67	83.5		A0A1D6BN20_WHEAT	Uncharacterized protein	SubName: Full=Uncharacterized protein {ECO:0000313|EnsemblPlants:TRIAE_CS42_7AL_TGACv1_557456_AA1781570.1};
TRINITY_DN69574_c2_g1_i1	tr|M7ZVX9|M7ZVX9_TRIUA	25	0.00011	54.3	34.6	ORFNames=TRIUR3_00436 {ECO:0000313|EMBL:EMS64252.1};	M7ZVX9_TRIUA	Uncharacterized protein	SubName: Full=Uncharacterized protein {ECO:0000313|EMBL:EMS64252.1, ECO:0000313|EnsemblPlants:TRIUR3_00436-P1};
TRINITY_DN69548_c0_g1_i1	tr|M8CAQ3|M8CAQ3_AEGTA	143	3e-78	299.7	99.5	ORFNames=F775_26761 {ECO:0000313|EMBL:EMT31414.1};	M8CAQ3_AEGTA	Seryl-tRNA synthetase	SubName: Full=Seryl-tRNA synthetase {ECO:0000313|EMBL:EMT31414.1, ECO:0000313|EnsemblPlants:EMT31414};
TRINITY_DN69548_c0_g1_i2	tr|M7ZRC7|M7ZRC7_TRIUA	131	4.5e-68	265.8	99.2	ORFNames=TRIUR3_18127 {ECO:0000313|EMBL:EMS50639.1};	M7ZRC7_TRIUA	Seryl-tRNA synthetase	SubName: Full=Seryl-tRNA synthetase {ECO:0000313|EMBL:EMS50639.1, ECO:0000313|EnsemblPlants:TRIUR3_18127-P1};
TRINITY_DN69506_c0_g1_i1	tr|A0A0Q3HB85|A0A0Q3HB85_BRADI	140	1e-57	231.5	99.8	ORFNames=BRADI_1g53011 {ECO:0000313|EMBL:KQK20183.1};	A0A0Q3HB85_BRADI	Uncharacterized protein	SubName: Full=Uncharacterized protein {ECO:0000313|EMBL:KQK20183.1};
TRINITY_DN69502_c0_g1_i1	tr|A0A1D6BTD4|A0A1D6BTD4_WHEAT	70	6e-11	75.1	99.5		A0A1D6BTD4_WHEAT	Kinesin-like protein	RecName: Full=Kinesin-like protein {ECO:0000256|RuleBase:RU000394};
TRINITY_DN69527_c0_g1_i1	tr|M8A4H1|M8A4H1_TRIUA	48	1.3e-11	79.7	13.3	ORFNames=TRIUR3_08594 {ECO:0000313|EMBL:EMS59530.1};	M8A4H1_TRIUA	Uncharacterized protein	SubName: Full=Uncharacterized protein {ECO:0000313|EMBL:EMS59530.1, ECO:0000313|EnsemblPlants:TRIUR3_08594-P1};
TRINITY_DN69527_c0_g2_i2	tr|A0A1D5RU43|A0A1D5RU43_WHEAT	57	1e-13	84.3	77.7		A0A1D5RU43_WHEAT	Glycosyltransferase	RecName: Full=Glycosyltransferase {ECO:0000256|RuleBase:RU362057}; EC=2.4.1.- {ECO:0000256|RuleBase:RU362057};
TRINITY_DN69527_c0_g2_i1	tr|A0A1D5RU43|A0A1D5RU43_WHEAT	47	1.7e-13	83.6	67.5		A0A1D5RU43_WHEAT	Glycosyltransferase	RecName: Full=Glycosyltransferase {ECO:0000256|RuleBase:RU362057}; EC=2.4.1.- {ECO:0000256|RuleBase:RU362057};
TRINITY_DN69527_c0_g3_i3	tr|M8AEL8|M8AEL8_TRIUA	93	4.5e-43	183	59.5	ORFNames=TRIUR3_01513 {ECO:0000313|EMBL:EMS59039.1};	M8AEL8_TRIUA	Uncharacterized protein	SubName: Full=Uncharacterized protein {ECO:0000313|EMBL:EMS59039.1, ECO:0000313|EnsemblPlants:TRIUR3_01513-P1};
TRINITY_DN69527_c0_g5_i1	tr|A0A1D5RU42|A0A1D5RU42_WHEAT	57	6.3e-22	112.1	57		A0A1D5RU42_WHEAT	Glycosyltransferase	RecName: Full=Glycosyltransferase {ECO:0000256|RuleBase:RU362057}; EC=2.4.1.- {ECO:0000256|RuleBase:RU362057};
TRINITY_DN69593_c0_g1_i1	tr|W5D5D7|W5D5D7_WHEAT	108	2.9e-57	229.6	99.7	ORFNames=TRAES_3BF084300020CFD_c1 {ECO:0000313|EMBL:CDM86983.1};	W5D5D7_WHEAT	Diphosphomevalonate decarboxylase; Mevalonate pyrophosphate decarboxylase	RecName: Full=Diphosphomevalonate decarboxylase {ECO:0000256|RuleBase:RU363086}; EC=4.1.1.33 {ECO:0000256|RuleBase:RU363086}; AltName: Full=Mevalonate pyrophosphate decarboxylase {ECO:0000256|RuleBase:RU363086};
TRINITY_DN69597_c0_g1_i1	tr|M0WS99|M0WS99_HORVV	45	2.5e-10	73.2	59		M0WS99_HORVV	Uncharacterized protein	SubName: Full=Uncharacterized protein {ECO:0000313|EnsemblPlants:HORVU7Hr1G073370.4};
TRINITY_DN69575_c0_g1_i5	tr|A0A1D5U7C1|A0A1D5U7C1_WHEAT	189	9.4e-70	271.9	95.4		A0A1D5U7C1_WHEAT	Uncharacterized protein	SubName: Full=Uncharacterized protein {ECO:0000313|EnsemblPlants:TRIAE_CS42_2BS_TGACv1_145990_AA0452090.1};
TRINITY_DN69575_c0_g1_i2	tr|A0A1D5U7C1|A0A1D5U7C1_WHEAT	189	1.1e-70	275	94.2		A0A1D5U7C1_WHEAT	Uncharacterized protein	SubName: Full=Uncharacterized protein {ECO:0000313|EnsemblPlants:TRIAE_CS42_2BS_TGACv1_145990_AA0452090.1};
TRINITY_DN69575_c0_g1_i3	tr|A0A1D5U7C1|A0A1D5U7C1_WHEAT	44	5.6e-06	58.9	49.6		A0A1D5U7C1_WHEAT	Uncharacterized protein	SubName: Full=Uncharacterized protein {ECO:0000313|EnsemblPlants:TRIAE_CS42_2BS_TGACv1_145990_AA0452090.1};
TRINITY_DN69575_c0_g1_i4	tr|A0A1D5U7C1|A0A1D5U7C1_WHEAT	183	1.9e-70	274.2	93.4		A0A1D5U7C1_WHEAT	Uncharacterized protein	SubName: Full=Uncharacterized protein {ECO:0000313|EnsemblPlants:TRIAE_CS42_2BS_TGACv1_145990_AA0452090.1};
TRINITY_DN69575_c1_g1_i1	tr|A0A1D5X240|A0A1D5X240_WHEAT	32	6.7e-10	72	34.3		A0A1D5X240_WHEAT	Phosphatidylinositol 4-phosphate 5-kinase	RecName: Full=Phosphatidylinositol 4-phosphate 5-kinase {ECO:0000256|PIRNR:PIRNR037274}; EC=2.7.1.68 {ECO:0000256|PIRNR:PIRNR037274};
TRINITY_DN69523_c0_g1_i1	tr|A0A1D5XB75|A0A1D5XB75_WHEAT	45	7.8e-12	78.2	58.4		A0A1D5XB75_WHEAT	Uncharacterized protein	SubName: Full=Uncharacterized protein {ECO:0000313|EnsemblPlants:TRIAE_CS42_4AS_TGACv1_306761_AA1013120.1};
TRINITY_DN69583_c0_g1_i1	tr|A0A1D5X4P6|A0A1D5X4P6_WHEAT	153	9.6e-49	202.2	73.9		A0A1D5X4P6_WHEAT	Uncharacterized protein	SubName: Full=Uncharacterized protein {ECO:0000313|EnsemblPlants:TRIAE_CS42_4AL_TGACv1_289766_AA0976540.1};
TRINITY_DN69579_c0_g1_i1	tr|A0A077S290|A0A077S290_WHEAT	90	7.6e-42	179.5	37.9	ORFNames=TRAES_3BF022100020CFD_c1 {ECO:0000313|EMBL:CDM83634.1};	A0A077S290_WHEAT	Uncharacterized protein	SubName: Full=Uncharacterized protein {ECO:0000313|EMBL:CDM83634.1, ECO:0000313|EnsemblPlants:TRIAE_CS42_3B_TGACv1_220788_AA0719260.1};
TRINITY_DN69579_c2_g1_i1	tr|A0A1D5WD82|A0A1D5WD82_WHEAT	68	1.4e-28	133.7	98.1		A0A1D5WD82_WHEAT	Uncharacterized protein	SubName: Full=Uncharacterized protein {ECO:0000313|EnsemblPlants:TRIAE_CS42_3DL_TGACv1_249197_AA0840930.2};
TRINITY_DN69517_c0_g1_i1	tr|A0A077S159|A0A077S159_WHEAT	21	0.00069	51.6	30.7	ORFNames=TRAES_3BF039400020CFD_c1 {ECO:0000313|EMBL:CDM86551.1}, TRAES_3BF039600030CFD_c1 {ECO:0000313|EMBL:CDM86572.1};	A0A077S159_WHEAT	Uncharacterized protein	SubName: Full=Uncharacterized protein {ECO:0000313|EMBL:CDM86572.1};
TRINITY_DN28078_c0_g1_i1	tr|A0A1D6C7W8|A0A1D6C7W8_WHEAT	205	1.5e-100	374.8	69.4		A0A1D6C7W8_WHEAT	Uncharacterized protein	SubName: Full=Uncharacterized protein {ECO:0000313|EnsemblPlants:TRIAE_CS42_7BL_TGACv1_578130_AA1889820.1};
TRINITY_DN28078_c0_g1_i7	tr|A0A1D6C7W8|A0A1D6C7W8_WHEAT	207	6.9e-93	349.4	69.9		A0A1D6C7W8_WHEAT	Uncharacterized protein	SubName: Full=Uncharacterized protein {ECO:0000313|EnsemblPlants:TRIAE_CS42_7BL_TGACv1_578130_AA1889820.1};
TRINITY_DN28078_c0_g1_i9	tr|A0A1D6C7W8|A0A1D6C7W8_WHEAT	207	1.4e-97	364.8	79.4		A0A1D6C7W8_WHEAT	Uncharacterized protein	SubName: Full=Uncharacterized protein {ECO:0000313|EnsemblPlants:TRIAE_CS42_7BL_TGACv1_578130_AA1889820.1};
TRINITY_DN28078_c0_g1_i8	tr|A0A1D6CKI0|A0A1D6CKI0_WHEAT	209	2.8e-93	350.5	77.4		A0A1D6CKI0_WHEAT	Uncharacterized protein	SubName: Full=Uncharacterized protein {ECO:0000313|EnsemblPlants:TRIAE_CS42_7DL_TGACv1_602538_AA1959790.1};
TRINITY_DN28078_c0_g1_i2	tr|A0A1D6CKI0|A0A1D6CKI0_WHEAT	209	1.4e-89	338.2	76.6		A0A1D6CKI0_WHEAT	Uncharacterized protein	SubName: Full=Uncharacterized protein {ECO:0000313|EnsemblPlants:TRIAE_CS42_7DL_TGACv1_602538_AA1959790.1};
TRINITY_DN28078_c0_g1_i5	tr|A0A1D6C7W8|A0A1D6C7W8_WHEAT	207	5.4e-93	349.7	68.8		A0A1D6C7W8_WHEAT	Uncharacterized protein	SubName: Full=Uncharacterized protein {ECO:0000313|EnsemblPlants:TRIAE_CS42_7BL_TGACv1_578130_AA1889820.1};
TRINITY_DN28078_c0_g1_i4	tr|A0A1D6CKI0|A0A1D6CKI0_WHEAT	209	3.6e-96	360.1	77.1		A0A1D6CKI0_WHEAT	Uncharacterized protein	SubName: Full=Uncharacterized protein {ECO:0000313|EnsemblPlants:TRIAE_CS42_7DL_TGACv1_602538_AA1959790.1};
TRINITY_DN28056_c0_g1_i2	tr|A0A287XPW0|A0A287XPW0_HORVV	40	4.5e-08	66.2	35.1		A0A287XPW0_HORVV	Uncharacterized protein	SubName: Full=Uncharacterized protein {ECO:0000313|EnsemblPlants:HORVU7Hr1G107390.1};
TRINITY_DN28056_c0_g1_i3	tr|A0A287XPW0|A0A287XPW0_HORVV	40	4.6e-08	66.2	34.3		A0A287XPW0_HORVV	Uncharacterized protein	SubName: Full=Uncharacterized protein {ECO:0000313|EnsemblPlants:HORVU7Hr1G107390.1};
TRINITY_DN28056_c0_g2_i1	tr|T1N8A8|T1N8A8_TRIUA	129	4.8e-59	236.5	59.8		T1N8A8_TRIUA	Uncharacterized protein	SubName: Full=Uncharacterized protein {ECO:0000313|EnsemblPlants:TRIUR3_26700-P1};
TRINITY_DN28056_c3_g1_i1	tr|M7Z3K1|M7Z3K1_TRIUA	78	7.5e-34	151.8	75	ORFNames=TRIUR3_21283 {ECO:0000313|EMBL:EMS54061.1};	M7Z3K1_TRIUA	Uncharacterized protein	SubName: Full=Uncharacterized protein {ECO:0000313|EMBL:EMS54061.1, ECO:0000313|EnsemblPlants:TRIUR3_21283-P1};
TRINITY_DN28052_c0_g1_i1	tr|A0A287TFG7|A0A287TFG7_HORVV	67	3.1e-20	105.9	97.6		A0A287TFG7_HORVV	Uncharacterized protein	SubName: Full=Uncharacterized protein {ECO:0000313|EnsemblPlants:HORVU6Hr1G016750.14};
TRINITY_DN28052_c1_g1_i1	tr|A0A1D6AYX6|A0A1D6AYX6_WHEAT	71	9e-26	124.4	96.4		A0A1D6AYX6_WHEAT	Uncharacterized protein	SubName: Full=Uncharacterized protein {ECO:0000313|EnsemblPlants:TRIAE_CS42_6BS_TGACv1_514289_AA1657990.6};
TRINITY_DN28052_c2_g1_i1	tr|A0A1D6ADZ0|A0A1D6ADZ0_WHEAT	99	1.4e-42	180.6	98.3		A0A1D6ADZ0_WHEAT	Uncharacterized protein	SubName: Full=Uncharacterized protein {ECO:0000313|EnsemblPlants:TRIAE_CS42_6AS_TGACv1_485269_AA1542150.1};
TRINITY_DN28052_c3_g1_i1	tr|A0A1D6AYX5|A0A1D6AYX5_WHEAT	77	4.8e-09	68.9	98.7		A0A1D6AYX5_WHEAT	Uncharacterized protein	SubName: Full=Uncharacterized protein {ECO:0000313|EnsemblPlants:TRIAE_CS42_6BS_TGACv1_514289_AA1657990.5};
TRINITY_DN28085_c0_g2_i6	tr|A0A1D6AG28|A0A1D6AG28_WHEAT	57	6.9e-25	122.5	38.8		A0A1D6AG28_WHEAT	Uncharacterized protein	SubName: Full=Uncharacterized protein {ECO:0000313|EnsemblPlants:TRIAE_CS42_6AS_TGACv1_485924_AA1554160.1};
TRINITY_DN28085_c0_g2_i11	tr|A0A1D6AG28|A0A1D6AG28_WHEAT	43	4.7e-12	79	49.6		A0A1D6AG28_WHEAT	Uncharacterized protein	SubName: Full=Uncharacterized protein {ECO:0000313|EnsemblPlants:TRIAE_CS42_6AS_TGACv1_485924_AA1554160.1};
TRINITY_DN28085_c0_g2_i8	tr|A0A1D6AG28|A0A1D6AG28_WHEAT	57	6.1e-25	122.5	43.3		A0A1D6AG28_WHEAT	Uncharacterized protein	SubName: Full=Uncharacterized protein {ECO:0000313|EnsemblPlants:TRIAE_CS42_6AS_TGACv1_485924_AA1554160.1};
TRINITY_DN28085_c0_g2_i4	tr|A0A1D5RRG6|A0A1D5RRG6_WHEAT	51	6.6e-10	72.8	32.6		A0A1D5RRG6_WHEAT	Uncharacterized protein	SubName: Full=Uncharacterized protein {ECO:0000313|EnsemblPlants:TRIAE_CS42_1AL_TGACv1_000538_AA0014170.1};
TRINITY_DN28085_c0_g2_i2	tr|A0A1D5RRG6|A0A1D5RRG6_WHEAT	33	3.9e-09	69.3	39.1		A0A1D5RRG6_WHEAT	Uncharacterized protein	SubName: Full=Uncharacterized protein {ECO:0000313|EnsemblPlants:TRIAE_CS42_1AL_TGACv1_000538_AA0014170.1};
TRINITY_DN28085_c0_g2_i10	tr|A0A1D6AG28|A0A1D6AG28_WHEAT	32	7.5e-10	72	30.6		A0A1D6AG28_WHEAT	Uncharacterized protein	SubName: Full=Uncharacterized protein {ECO:0000313|EnsemblPlants:TRIAE_CS42_6AS_TGACv1_485924_AA1554160.1};
TRINITY_DN28085_c0_g2_i5	tr|A0A1D5RRG6|A0A1D5RRG6_WHEAT	38	2.7e-12	80.5	28.4		A0A1D5RRG6_WHEAT	Uncharacterized protein	SubName: Full=Uncharacterized protein {ECO:0000313|EnsemblPlants:TRIAE_CS42_1AL_TGACv1_000538_AA0014170.1};
TRINITY_DN28060_c0_g1_i2	tr|A0A194YRX0|A0A194YRX0_SORBI	89	5.1e-47	195.3	98.5	ORFNames=SORBI_3004G270800 {ECO:0000313|EMBL:KXG30937.1};	A0A194YRX0_SORBI	Uncharacterized protein	SubName: Full=Uncharacterized protein {ECO:0000313|EMBL:KXG30937.1};
TRINITY_DN28060_c0_g1_i1	tr|A0A194YRX0|A0A194YRX0_SORBI	93	2.5e-49	203	99.3	ORFNames=SORBI_3004G270800 {ECO:0000313|EMBL:KXG30937.1};	A0A194YRX0_SORBI	Uncharacterized protein	SubName: Full=Uncharacterized protein {ECO:0000313|EMBL:KXG30937.1};
TRINITY_DN28042_c0_g1_i1	tr|A0A1D6A8H7|A0A1D6A8H7_WHEAT	105	7.8e-47	194.9	99.7		A0A1D6A8H7_WHEAT	Uncharacterized protein	SubName: Full=Uncharacterized protein {ECO:0000313|EnsemblPlants:TRIAE_CS42_6AL_TGACv1_471842_AA1515090.7};
TRINITY_DN28006_c0_g1_i5	tr|M8BEQ6|M8BEQ6_AEGTA	280	8.5e-125	456.4	45.1	ORFNames=F775_26415 {ECO:0000313|EMBL:EMT05208.1};	M8BEQ6_AEGTA	Uncharacterized protein	SubName: Full=Uncharacterized protein {ECO:0000313|EMBL:EMT05208.1, ECO:0000313|EnsemblPlants:EMT05208};
TRINITY_DN28006_c0_g1_i6	tr|A0A1D5WWZ1|A0A1D5WWZ1_WHEAT	72	5.7e-34	153.3	30.9		A0A1D5WWZ1_WHEAT	Uncharacterized protein	SubName: Full=Uncharacterized protein {ECO:0000313|EnsemblPlants:TRIAE_CS42_3DS_TGACv1_274049_AA0934470.1};
TRINITY_DN28006_c0_g1_i1	tr|M8BEQ6|M8BEQ6_AEGTA	280	6.2e-125	456.4	61.2	ORFNames=F775_26415 {ECO:0000313|EMBL:EMT05208.1};	M8BEQ6_AEGTA	Uncharacterized protein	SubName: Full=Uncharacterized protein {ECO:0000313|EMBL:EMT05208.1, ECO:0000313|EnsemblPlants:EMT05208};
TRINITY_DN28006_c0_g1_i4	tr|M8BEQ6|M8BEQ6_AEGTA	280	6.5e-125	456.4	58.7	ORFNames=F775_26415 {ECO:0000313|EMBL:EMT05208.1};	M8BEQ6_AEGTA	Uncharacterized protein	SubName: Full=Uncharacterized protein {ECO:0000313|EMBL:EMT05208.1, ECO:0000313|EnsemblPlants:EMT05208};
TRINITY_DN28006_c0_g1_i7	tr|A0A1D5WWZ1|A0A1D5WWZ1_WHEAT	247	1.1e-104	389	58.2		A0A1D5WWZ1_WHEAT	Uncharacterized protein	SubName: Full=Uncharacterized protein {ECO:0000313|EnsemblPlants:TRIAE_CS42_3DS_TGACv1_274049_AA0934470.1};
TRINITY_DN28006_c0_g1_i12	tr|A0A1D5WWZ1|A0A1D5WWZ1_WHEAT	72	6.4e-34	153.3	27.7		A0A1D5WWZ1_WHEAT	Uncharacterized protein	SubName: Full=Uncharacterized protein {ECO:0000313|EnsemblPlants:TRIAE_CS42_3DS_TGACv1_274049_AA0934470.1};
TRINITY_DN28006_c0_g1_i10	tr|M8BEQ6|M8BEQ6_AEGTA	280	1.1e-123	452.2	61.4	ORFNames=F775_26415 {ECO:0000313|EMBL:EMT05208.1};	M8BEQ6_AEGTA	Uncharacterized protein	SubName: Full=Uncharacterized protein {ECO:0000313|EMBL:EMT05208.1, ECO:0000313|EnsemblPlants:EMT05208};
TRINITY_DN28006_c0_g1_i8	tr|M8BEQ6|M8BEQ6_AEGTA	182	2.7e-64	254.6	53.3	ORFNames=F775_26415 {ECO:0000313|EMBL:EMT05208.1};	M8BEQ6_AEGTA	Uncharacterized protein	SubName: Full=Uncharacterized protein {ECO:0000313|EMBL:EMT05208.1, ECO:0000313|EnsemblPlants:EMT05208};
TRINITY_DN28006_c0_g1_i11	tr|M8BEQ6|M8BEQ6_AEGTA	280	6.6e-125	456.4	57.8	ORFNames=F775_26415 {ECO:0000313|EMBL:EMT05208.1};	M8BEQ6_AEGTA	Uncharacterized protein	SubName: Full=Uncharacterized protein {ECO:0000313|EMBL:EMT05208.1, ECO:0000313|EnsemblPlants:EMT05208};
TRINITY_DN28010_c0_g1_i5	tr|A0A1D6DD54|A0A1D6DD54_WHEAT	211	8.7e-94	352.8	51.6		A0A1D6DD54_WHEAT	Uncharacterized protein	SubName: Full=Uncharacterized protein {ECO:0000313|EnsemblPlants:TRIAE_CS42_U_TGACv1_641771_AA2103870.2};
TRINITY_DN28010_c0_g1_i1	tr|A0A1D6BBN6|A0A1D6BBN6_WHEAT	126	8.7e-61	241.5	99.5		A0A1D6BBN6_WHEAT	Uncharacterized protein	SubName: Full=Uncharacterized protein {ECO:0000313|EnsemblPlants:TRIAE_CS42_6DS_TGACv1_542491_AA1722240.1};
TRINITY_DN28010_c0_g1_i4	tr|A0A287T5I0|A0A287T5I0_HORVV	77	2.2e-33	150.2	74.5		A0A287T5I0_HORVV	Uncharacterized protein	SubName: Full=Uncharacterized protein {ECO:0000313|EnsemblPlants:HORVU6Hr1G002980.11};
TRINITY_DN28010_c0_g1_i10	tr|R7W365|R7W365_AEGTA	77	1.2e-35	157.5	84	ORFNames=F775_15210 {ECO:0000313|EMBL:EMT01927.1};	R7W365_AEGTA	Uncharacterized protein	SubName: Full=Uncharacterized protein {ECO:0000313|EMBL:EMT01927.1, ECO:0000313|EnsemblPlants:EMT01927};
TRINITY_DN28010_c0_g1_i6	tr|M8C023|M8C023_AEGTA	177	9.9e-87	328.2	99.8	ORFNames=F775_12141 {ECO:0000313|EMBL:EMT27373.1};	M8C023_AEGTA	Uncharacterized protein	SubName: Full=Uncharacterized protein {ECO:0000313|EMBL:EMT27373.1, ECO:0000313|EnsemblPlants:EMT27373};
TRINITY_DN28010_c0_g1_i7	tr|A0A1D6DD54|A0A1D6DD54_WHEAT	177	5.6e-90	339	99.8		A0A1D6DD54_WHEAT	Uncharacterized protein	SubName: Full=Uncharacterized protein {ECO:0000313|EnsemblPlants:TRIAE_CS42_U_TGACv1_641771_AA2103870.2};
TRINITY_DN28010_c0_g1_i8	tr|A0A1D6BBN6|A0A1D6BBN6_WHEAT	160	6.5e-87	328.9	80.7		A0A1D6BBN6_WHEAT	Uncharacterized protein	SubName: Full=Uncharacterized protein {ECO:0000313|EnsemblPlants:TRIAE_CS42_6DS_TGACv1_542491_AA1722240.1};
TRINITY_DN28010_c0_g1_i9	tr|A0A1D6BBN6|A0A1D6BBN6_WHEAT	160	1.2e-86	328.9	44.9		A0A1D6BBN6_WHEAT	Uncharacterized protein	SubName: Full=Uncharacterized protein {ECO:0000313|EnsemblPlants:TRIAE_CS42_6DS_TGACv1_542491_AA1722240.1};
TRINITY_DN28010_c0_g1_i3	tr|A0A1D6DD54|A0A1D6DD54_WHEAT	211	5.3e-94	352.8	84		A0A1D6DD54_WHEAT	Uncharacterized protein	SubName: Full=Uncharacterized protein {ECO:0000313|EnsemblPlants:TRIAE_CS42_U_TGACv1_641771_AA2103870.2};
TRINITY_DN28010_c0_g2_i2	tr|A0A1D6AVC7|A0A1D6AVC7_WHEAT	100	5.5e-49	202.2	84		A0A1D6AVC7_WHEAT	Uncharacterized protein	SubName: Full=Uncharacterized protein {ECO:0000313|EnsemblPlants:TRIAE_CS42_6BS_TGACv1_513268_AA1636720.1};
TRINITY_DN28010_c0_g2_i1	tr|A0A1D6AVC7|A0A1D6AVC7_WHEAT	119	3.9e-63	249.2	99.4		A0A1D6AVC7_WHEAT	Uncharacterized protein	SubName: Full=Uncharacterized protein {ECO:0000313|EnsemblPlants:TRIAE_CS42_6BS_TGACv1_513268_AA1636720.1};
TRINITY_DN28034_c0_g1_i2	tr|W5AAT2|W5AAT2_WHEAT	29	2e-05	58.2	15.7		W5AAT2_WHEAT	Uncharacterized protein	SubName: Full=Uncharacterized protein {ECO:0000313|EnsemblPlants:TRIAE_CS42_1BS_TGACv1_051572_AA0180490.3};
TRINITY_DN28000_c0_g1_i3	tr|M0X7S9|M0X7S9_HORVV	23	0.00078	53.1	10.2		M0X7S9_HORVV	Uncharacterized protein	SubName: Full=Uncharacterized protein {ECO:0000313|EnsemblPlants:HORVU5Hr1G068320.4};
TRINITY_DN28000_c0_g1_i1	sp|Q67TP9|HSFB1_ORYSJ	76	2.9e-11	76.3	99.1	Name=HSFB1; Synonyms=HSF23; OrderedLocusNames=Os09g0456800, LOC_Os09g28354, LOC_Os09g28360; ORFNames=B1342C04.35;	HSFB1_ORYSJ	Heat stress transcription factor B-1; Heat stress transcription factor 23; OsHsf-23	RecName: Full=Heat stress transcription factor B-1; AltName: Full=Heat stress transcription factor 23; Short=OsHsf-23;
TRINITY_DN28000_c0_g1_i4	tr|M0X7S9|M0X7S9_HORVV	26	0.00045	53.9	11.9		M0X7S9_HORVV	Uncharacterized protein	SubName: Full=Uncharacterized protein {ECO:0000313|EnsemblPlants:HORVU5Hr1G068320.4};
TRINITY_DN28000_c0_g1_i2	tr|M0X7S9|M0X7S9_HORVV	23	0.00056	53.1	14.1		M0X7S9_HORVV	Uncharacterized protein	SubName: Full=Uncharacterized protein {ECO:0000313|EnsemblPlants:HORVU5Hr1G068320.4};
TRINITY_DN28000_c0_g2_i1	tr|A0A287RMN8|A0A287RMN8_HORVV	23	0.00011	54.3	31.2		A0A287RMN8_HORVV	Uncharacterized protein	SubName: Full=Uncharacterized protein {ECO:0000313|EnsemblPlants:HORVU5Hr1G068320.2};
TRINITY_DN28043_c1_g2_i1	tr|N1R0I0|N1R0I0_AEGTA	32	1.6e-05	58.2	22.1	ORFNames=F775_08084 {ECO:0000313|EMBL:EMT17734.1};	N1R0I0_AEGTA	Uncharacterized protein	SubName: Full=Uncharacterized protein {ECO:0000313|EMBL:EMT17734.1, ECO:0000313|EnsemblPlants:EMT17734};
TRINITY_DN28092_c0_g1_i2	tr|M7ZB97|M7ZB97_TRIUA	46	8.3e-13	82.4	29.5	ORFNames=TRIUR3_12375 {ECO:0000313|EMBL:EMS57337.1};	M7ZB97_TRIUA	Uncharacterized protein	SubName: Full=Uncharacterized protein {ECO:0000313|EMBL:EMS57337.1, ECO:0000313|EnsemblPlants:TRIUR3_12375-P1};
TRINITY_DN28092_c0_g1_i1	tr|M7ZB97|M7ZB97_TRIUA	34	0.00049	53.5	18.2	ORFNames=TRIUR3_12375 {ECO:0000313|EMBL:EMS57337.1};	M7ZB97_TRIUA	Uncharacterized protein	SubName: Full=Uncharacterized protein {ECO:0000313|EMBL:EMS57337.1, ECO:0000313|EnsemblPlants:TRIUR3_12375-P1};
TRINITY_DN28092_c0_g2_i1	tr|M5EES0|M5EES0_WHEAT	167	3.7e-95	357.1	50.5	Name=GT47_2A {ECO:0000313|EMBL:CCV01574.1};	M5EES0_WHEAT	GT47_2A	SubName: Full=GT47_2A {ECO:0000313|EMBL:CCV01574.1, ECO:0000313|EnsemblPlants:TRIAE_CS42_3AL_TGACv1_194940_AA0642360.2};
TRINITY_DN28092_c0_g2_i6	tr|M5EES0|M5EES0_WHEAT	135	5.6e-74	286.6	45.1	Name=GT47_2A {ECO:0000313|EMBL:CCV01574.1};	M5EES0_WHEAT	GT47_2A	SubName: Full=GT47_2A {ECO:0000313|EMBL:CCV01574.1, ECO:0000313|EnsemblPlants:TRIAE_CS42_3AL_TGACv1_194940_AA0642360.2};
TRINITY_DN28092_c0_g2_i2	tr|M5EES0|M5EES0_WHEAT	135	4.9e-74	286.6	51.1	Name=GT47_2A {ECO:0000313|EMBL:CCV01574.1};	M5EES0_WHEAT	GT47_2A	SubName: Full=GT47_2A {ECO:0000313|EMBL:CCV01574.1, ECO:0000313|EnsemblPlants:TRIAE_CS42_3AL_TGACv1_194940_AA0642360.2};
TRINITY_DN28092_c0_g2_i5	tr|M5EEY5|M5EEY5_WHEAT	135	1.2e-73	285.4	45.2	Name=GT47_2B {ECO:0000313|EMBL:CCV01572.1}; ORFNames=TRAES_3BF169000110CFD_c1 {ECO:0000313|EMBL:CDM85854.1};	M5EEY5_WHEAT	GT47_2B	SubName: Full=GT47_2B {ECO:0000313|EMBL:CCV01572.1, ECO:0000313|EnsemblPlants:TRIAE_CS42_3B_TGACv1_222057_AA0756260.3};
TRINITY_DN28092_c0_g2_i3	tr|M5EEY5|M5EEY5_WHEAT	167	8.3e-95	355.9	50.4	Name=GT47_2B {ECO:0000313|EMBL:CCV01572.1}; ORFNames=TRAES_3BF169000110CFD_c1 {ECO:0000313|EMBL:CDM85854.1};	M5EEY5_WHEAT	GT47_2B	SubName: Full=GT47_2B {ECO:0000313|EMBL:CCV01572.1, ECO:0000313|EnsemblPlants:TRIAE_CS42_3B_TGACv1_222057_AA0756260.3};
TRINITY_DN28090_c0_g1_i5	tr|W5DRV7|W5DRV7_WHEAT	370	2.6e-169	604	73.9		W5DRV7_WHEAT	Uncharacterized protein	SubName: Full=Uncharacterized protein {ECO:0000313|EnsemblPlants:TRIAE_CS42_4AL_TGACv1_290140_AA0982100.1};
TRINITY_DN28090_c0_g1_i7	tr|W5DRV7|W5DRV7_WHEAT	370	8.7e-171	609	69.7		W5DRV7_WHEAT	Uncharacterized protein	SubName: Full=Uncharacterized protein {ECO:0000313|EnsemblPlants:TRIAE_CS42_4AL_TGACv1_290140_AA0982100.1};
TRINITY_DN28090_c0_g1_i4	tr|W5DRV7|W5DRV7_WHEAT	370	1.4e-169	604.7	83.6		W5DRV7_WHEAT	Uncharacterized protein	SubName: Full=Uncharacterized protein {ECO:0000313|EnsemblPlants:TRIAE_CS42_4AL_TGACv1_290140_AA0982100.1};
TRINITY_DN28090_c0_g1_i3	tr|A0A1D6RYH8|A0A1D6RYH8_WHEAT	400	2.3e-171	610.9	75.2		A0A1D6RYH8_WHEAT	Uncharacterized protein	SubName: Full=Uncharacterized protein {ECO:0000313|EnsemblPlants:TRIAE_CS42_4BS_TGACv1_328611_AA1090980.1};
TRINITY_DN28090_c0_g1_i1	tr|A0A1D6RYH8|A0A1D6RYH8_WHEAT	399	1.8e-180	641	87.9		A0A1D6RYH8_WHEAT	Uncharacterized protein	SubName: Full=Uncharacterized protein {ECO:0000313|EnsemblPlants:TRIAE_CS42_4BS_TGACv1_328611_AA1090980.1};
TRINITY_DN28090_c0_g1_i11	tr|A0A1D6RYH8|A0A1D6RYH8_WHEAT	399	2.3e-181	644	79.8		A0A1D6RYH8_WHEAT	Uncharacterized protein	SubName: Full=Uncharacterized protein {ECO:0000313|EnsemblPlants:TRIAE_CS42_4BS_TGACv1_328611_AA1090980.1};
TRINITY_DN28090_c0_g1_i2	tr|W5DRV7|W5DRV7_WHEAT	370	4.1e-170	606.7	73.6		W5DRV7_WHEAT	Uncharacterized protein	SubName: Full=Uncharacterized protein {ECO:0000313|EnsemblPlants:TRIAE_CS42_4AL_TGACv1_290140_AA0982100.1};
TRINITY_DN28090_c0_g1_i8	tr|W5DRV7|W5DRV7_WHEAT	370	5.6e-170	606.3	70		W5DRV7_WHEAT	Uncharacterized protein	SubName: Full=Uncharacterized protein {ECO:0000313|EnsemblPlants:TRIAE_CS42_4AL_TGACv1_290140_AA0982100.1};
TRINITY_DN28090_c0_g2_i1	tr|A0A1D6SFM0|A0A1D6SFM0_WHEAT	213	2.2e-96	360.5	99.4		A0A1D6SFM0_WHEAT	Uncharacterized protein	SubName: Full=Uncharacterized protein {ECO:0000313|EnsemblPlants:TRIAE_CS42_7DS_TGACv1_622068_AA2032200.1};
TRINITY_DN28022_c0_g1_i1	tr|A0A1D6CQY1|A0A1D6CQY1_WHEAT	116	1.6e-40	174.1	100		A0A1D6CQY1_WHEAT	Uncharacterized protein	SubName: Full=Uncharacterized protein {ECO:0000313|EnsemblPlants:TRIAE_CS42_7DL_TGACv1_603679_AA1987180.1};
TRINITY_DN28022_c0_g2_i1	tr|A0A1D5Y896|A0A1D5Y896_WHEAT	117	1.6e-56	227.6	74.4		A0A1D5Y896_WHEAT	Uncharacterized protein	SubName: Full=Uncharacterized protein {ECO:0000313|EnsemblPlants:TRIAE_CS42_4DS_TGACv1_361893_AA1173970.1};
TRINITY_DN28022_c1_g1_i4	tr|A0A1D5YA84|A0A1D5YA84_WHEAT	490	2.2e-205	723.8	99.9		A0A1D5YA84_WHEAT	Uncharacterized protein	SubName: Full=Uncharacterized protein {ECO:0000313|EnsemblPlants:TRIAE_CS42_4DS_TGACv1_362663_AA1181290.1};
TRINITY_DN28022_c1_g1_i3	tr|A0A1D5YA84|A0A1D5YA84_WHEAT	494	6.8e-210	738.8	100		A0A1D5YA84_WHEAT	Uncharacterized protein	SubName: Full=Uncharacterized protein {ECO:0000313|EnsemblPlants:TRIAE_CS42_4DS_TGACv1_362663_AA1181290.1};
TRINITY_DN28022_c1_g1_i2	tr|A0A1D5YA84|A0A1D5YA84_WHEAT	400	5.9e-223	781.9	96		A0A1D5YA84_WHEAT	Uncharacterized protein	SubName: Full=Uncharacterized protein {ECO:0000313|EnsemblPlants:TRIAE_CS42_4DS_TGACv1_362663_AA1181290.1};
TRINITY_DN28022_c1_g1_i1	tr|A0A1D6BK64|A0A1D6BK64_WHEAT	81	1.2e-34	154.1	100		A0A1D6BK64_WHEAT	Uncharacterized protein	SubName: Full=Uncharacterized protein {ECO:0000313|EnsemblPlants:TRIAE_CS42_7AL_TGACv1_556670_AA1768490.1};
TRINITY_DN28038_c0_g1_i1	tr|A0A1D5UH28|A0A1D5UH28_WHEAT	87	1.9e-31	145.6	19.7		A0A1D5UH28_WHEAT	Uncharacterized protein	SubName: Full=Uncharacterized protein {ECO:0000313|EnsemblPlants:TRIAE_CS42_2DL_TGACv1_158041_AA0507030.1};
TRINITY_DN28038_c0_g1_i5	tr|A0A1D5UH28|A0A1D5UH28_WHEAT	87	2e-31	145.6	19.2		A0A1D5UH28_WHEAT	Uncharacterized protein	SubName: Full=Uncharacterized protein {ECO:0000313|EnsemblPlants:TRIAE_CS42_2DL_TGACv1_158041_AA0507030.1};
TRINITY_DN28038_c0_g1_i7	tr|A0A1D5UH28|A0A1D5UH28_WHEAT	87	1.8e-31	145.6	21.4		A0A1D5UH28_WHEAT	Uncharacterized protein	SubName: Full=Uncharacterized protein {ECO:0000313|EnsemblPlants:TRIAE_CS42_2DL_TGACv1_158041_AA0507030.1};
TRINITY_DN28038_c0_g1_i3	tr|A0A1D5UH28|A0A1D5UH28_WHEAT	87	1.8e-31	145.6	20.8		A0A1D5UH28_WHEAT	Uncharacterized protein	SubName: Full=Uncharacterized protein {ECO:0000313|EnsemblPlants:TRIAE_CS42_2DL_TGACv1_158041_AA0507030.1};
TRINITY_DN28038_c0_g1_i6	tr|A0A1D5UH28|A0A1D5UH28_WHEAT	87	1.8e-31	145.6	21.6		A0A1D5UH28_WHEAT	Uncharacterized protein	SubName: Full=Uncharacterized protein {ECO:0000313|EnsemblPlants:TRIAE_CS42_2DL_TGACv1_158041_AA0507030.1};
TRINITY_DN28038_c0_g1_i2	tr|A0A1D5UH28|A0A1D5UH28_WHEAT	87	1.6e-31	145.6	23.6		A0A1D5UH28_WHEAT	Uncharacterized protein	SubName: Full=Uncharacterized protein {ECO:0000313|EnsemblPlants:TRIAE_CS42_2DL_TGACv1_158041_AA0507030.1};
TRINITY_DN28038_c0_g1_i4	tr|A0A1D5UH28|A0A1D5UH28_WHEAT	87	7e-32	145.2	71.2		A0A1D5UH28_WHEAT	Uncharacterized protein	SubName: Full=Uncharacterized protein {ECO:0000313|EnsemblPlants:TRIAE_CS42_2DL_TGACv1_158041_AA0507030.1};
TRINITY_DN28038_c1_g2_i2	tr|R7WBF9|R7WBF9_AEGTA	42	1.4e-07	66.2	12	ORFNames=F775_00466 {ECO:0000313|EMBL:EMT19103.1};	R7WBF9_AEGTA	Uncharacterized protein	SubName: Full=Uncharacterized protein {ECO:0000313|EMBL:EMT19103.1, ECO:0000313|EnsemblPlants:EMT19103};
TRINITY_DN28038_c1_g2_i4	tr|A0A1D5UH28|A0A1D5UH28_WHEAT	101	9.6e-11	76.6	27.6		A0A1D5UH28_WHEAT	Uncharacterized protein	SubName: Full=Uncharacterized protein {ECO:0000313|EnsemblPlants:TRIAE_CS42_2DL_TGACv1_158041_AA0507030.1};
TRINITY_DN28038_c1_g2_i1	tr|A0A1D5UH28|A0A1D5UH28_WHEAT	101	1.1e-10	76.6	23.5		A0A1D5UH28_WHEAT	Uncharacterized protein	SubName: Full=Uncharacterized protein {ECO:0000313|EnsemblPlants:TRIAE_CS42_2DL_TGACv1_158041_AA0507030.1};
TRINITY_DN28038_c1_g2_i13	tr|A0A1D5UH28|A0A1D5UH28_WHEAT	101	9.6e-11	76.6	27.6		A0A1D5UH28_WHEAT	Uncharacterized protein	SubName: Full=Uncharacterized protein {ECO:0000313|EnsemblPlants:TRIAE_CS42_2DL_TGACv1_158041_AA0507030.1};
TRINITY_DN28038_c1_g2_i9	tr|A0A1D5UH28|A0A1D5UH28_WHEAT	101	8.3e-11	76.6	31.7		A0A1D5UH28_WHEAT	Uncharacterized protein	SubName: Full=Uncharacterized protein {ECO:0000313|EnsemblPlants:TRIAE_CS42_2DL_TGACv1_158041_AA0507030.1};
TRINITY_DN28038_c1_g2_i5	tr|A0A1D5UH28|A0A1D5UH28_WHEAT	101	1.1e-10	76.6	24.1		A0A1D5UH28_WHEAT	Uncharacterized protein	SubName: Full=Uncharacterized protein {ECO:0000313|EnsemblPlants:TRIAE_CS42_2DL_TGACv1_158041_AA0507030.1};
TRINITY_DN28041_c0_g1_i4	tr|A0A1D5X390|A0A1D5X390_WHEAT	113	3.8e-55	223	76.2		A0A1D5X390_WHEAT	Uncharacterized protein	SubName: Full=Uncharacterized protein {ECO:0000313|EnsemblPlants:TRIAE_CS42_4AL_TGACv1_289326_AA0969130.1};
TRINITY_DN28041_c0_g1_i3	tr|A0A1D5SUI1|A0A1D5SUI1_WHEAT	56	2.5e-19	103.2	64.7		A0A1D5SUI1_WHEAT	Uncharacterized protein	SubName: Full=Uncharacterized protein {ECO:0000313|EnsemblPlants:TRIAE_CS42_1DL_TGACv1_062021_AA0207530.1};
TRINITY_DN28041_c0_g1_i1	tr|A0A1D5SUI1|A0A1D5SUI1_WHEAT	98	9.5e-36	158.3	76.2		A0A1D5SUI1_WHEAT	Uncharacterized protein	SubName: Full=Uncharacterized protein {ECO:0000313|EnsemblPlants:TRIAE_CS42_1DL_TGACv1_062021_AA0207530.1};
TRINITY_DN28041_c0_g1_i2	tr|A0A1D5SUI1|A0A1D5SUI1_WHEAT	77	8.5e-33	148.3	72		A0A1D5SUI1_WHEAT	Uncharacterized protein	SubName: Full=Uncharacterized protein {ECO:0000313|EnsemblPlants:TRIAE_CS42_1DL_TGACv1_062021_AA0207530.1};
TRINITY_DN28041_c0_g2_i2	tr|A0A1D6BYV8|A0A1D6BYV8_WHEAT	310	9.2e-176	624.8	97.3		A0A1D6BYV8_WHEAT	Uncharacterized protein	SubName: Full=Uncharacterized protein {ECO:0000313|EnsemblPlants:TRIAE_CS42_7AS_TGACv1_570742_AA1840230.1};
TRINITY_DN28041_c0_g2_i1	tr|A0A1D5URD4|A0A1D5URD4_WHEAT	318	7e-176	625.2	99.8		A0A1D5URD4_WHEAT	Uncharacterized protein	SubName: Full=Uncharacterized protein {ECO:0000313|EnsemblPlants:TRIAE_CS42_2DL_TGACv1_160408_AA0550210.1};
TRINITY_DN28072_c0_g1_i4	tr|A0A1D5YZR5|A0A1D5YZR5_WHEAT	261	8.8e-151	542.3	56		A0A1D5YZR5_WHEAT	Uncharacterized protein	SubName: Full=Uncharacterized protein {ECO:0000313|EnsemblPlants:TRIAE_CS42_5BL_TGACv1_404450_AA1300160.1};
TRINITY_DN28072_c0_g1_i11	tr|A0A1D5ZRY7|A0A1D5ZRY7_WHEAT	345	5.5e-174	619	99.7		A0A1D5ZRY7_WHEAT	Uncharacterized protein	SubName: Full=Uncharacterized protein {ECO:0000313|EnsemblPlants:TRIAE_CS42_5DL_TGACv1_434363_AA1434570.3};
TRINITY_DN28072_c0_g1_i12	tr|A0A1D5YZR5|A0A1D5YZR5_WHEAT	262	1.6e-144	521.5	56.1		A0A1D5YZR5_WHEAT	Uncharacterized protein	SubName: Full=Uncharacterized protein {ECO:0000313|EnsemblPlants:TRIAE_CS42_5BL_TGACv1_404450_AA1300160.1};
TRINITY_DN28072_c0_g1_i10	tr|A0A1D5ZRY7|A0A1D5ZRY7_WHEAT	332	1.8e-173	617.5	85.1		A0A1D5ZRY7_WHEAT	Uncharacterized protein	SubName: Full=Uncharacterized protein {ECO:0000313|EnsemblPlants:TRIAE_CS42_5DL_TGACv1_434363_AA1434570.3};
TRINITY_DN28072_c0_g1_i1	tr|A0A1D5ZRY7|A0A1D5ZRY7_WHEAT	332	9e-172	612.1	71.6		A0A1D5ZRY7_WHEAT	Uncharacterized protein	SubName: Full=Uncharacterized protein {ECO:0000313|EnsemblPlants:TRIAE_CS42_5DL_TGACv1_434363_AA1434570.3};
TRINITY_DN28072_c0_g1_i6	tr|A0A1D5YZR5|A0A1D5YZR5_WHEAT	294	1.8e-166	594.3	69.7		A0A1D5YZR5_WHEAT	Uncharacterized protein	SubName: Full=Uncharacterized protein {ECO:0000313|EnsemblPlants:TRIAE_CS42_5BL_TGACv1_404450_AA1300160.1};
TRINITY_DN28072_c0_g1_i3	tr|A0A1D5YZR5|A0A1D5YZR5_WHEAT	262	1.6e-144	521.5	56.1		A0A1D5YZR5_WHEAT	Uncharacterized protein	SubName: Full=Uncharacterized protein {ECO:0000313|EnsemblPlants:TRIAE_CS42_5BL_TGACv1_404450_AA1300160.1};
TRINITY_DN28072_c0_g1_i7	tr|A0A1D5YZR5|A0A1D5YZR5_WHEAT	261	8.8e-151	542.3	56		A0A1D5YZR5_WHEAT	Uncharacterized protein	SubName: Full=Uncharacterized protein {ECO:0000313|EnsemblPlants:TRIAE_CS42_5BL_TGACv1_404450_AA1300160.1};
TRINITY_DN28088_c0_g1_i1	tr|A0A287M2P5|A0A287M2P5_HORVV	172	3.8e-48	199.9	99.4		A0A287M2P5_HORVV	Uncharacterized protein	SubName: Full=Uncharacterized protein {ECO:0000313|EnsemblPlants:HORVU3Hr1G086190.2};
TRINITY_DN28088_c0_g1_i3	tr|A0A287M2Q7|A0A287M2Q7_HORVV	75	1.3e-31	145.6	30.5		A0A287M2Q7_HORVV	Photosystem II reaction center Psb28 protein	RecName: Full=Photosystem II reaction center Psb28 protein {ECO:0000256|RuleBase:RU003509};
TRINITY_DN28088_c0_g1_i5	tr|A0A287M2Q7|A0A287M2Q7_HORVV	75	1.3e-31	145.6	29.3		A0A287M2Q7_HORVV	Photosystem II reaction center Psb28 protein	RecName: Full=Photosystem II reaction center Psb28 protein {ECO:0000256|RuleBase:RU003509};
TRINITY_DN28088_c0_g1_i4	tr|A0A287M2P5|A0A287M2P5_HORVV	142	2.1e-54	220.7	83.7		A0A287M2P5_HORVV	Uncharacterized protein	SubName: Full=Uncharacterized protein {ECO:0000313|EnsemblPlants:HORVU3Hr1G086190.2};
TRINITY_DN28088_c0_g1_i2	tr|A0A287M2P5|A0A287M2P5_HORVV	142	2.2e-59	237.3	83.7		A0A287M2P5_HORVV	Uncharacterized protein	SubName: Full=Uncharacterized protein {ECO:0000313|EnsemblPlants:HORVU3Hr1G086190.2};
TRINITY_DN28088_c0_g2_i2	tr|A0A1D5V6D8|A0A1D5V6D8_WHEAT	75	7.9e-33	147.9	98.7		A0A1D5V6D8_WHEAT	Photosystem II reaction center Psb28 protein	RecName: Full=Photosystem II reaction center Psb28 protein {ECO:0000256|RuleBase:RU003509};
TRINITY_DN28088_c0_g2_i1	tr|A0A1D6S5M2|A0A1D6S5M2_WHEAT	142	3.4e-72	279.6	94		A0A1D6S5M2_WHEAT	Photosystem II reaction center Psb28 protein	RecName: Full=Photosystem II reaction center Psb28 protein {ECO:0000256|RuleBase:RU003509};
TRINITY_DN28068_c0_g1_i4	tr|A0A1D6CPU8|A0A1D6CPU8_WHEAT	95	6.6e-45	188.3	98.6		A0A1D6CPU8_WHEAT	Uncharacterized protein	SubName: Full=Uncharacterized protein {ECO:0000313|EnsemblPlants:TRIAE_CS42_7DL_TGACv1_603353_AA1981640.1};
TRINITY_DN28068_c0_g1_i6	tr|A0A1D6C4J7|A0A1D6C4J7_WHEAT	214	9.9e-72	279.3	62.5		A0A1D6C4J7_WHEAT	Uncharacterized protein	SubName: Full=Uncharacterized protein {ECO:0000313|EnsemblPlants:TRIAE_CS42_7BL_TGACv1_577274_AA1871030.1};
TRINITY_DN28068_c0_g1_i1	tr|A0A1D6CPU8|A0A1D6CPU8_WHEAT	61	1.2e-25	124.8	48.2		A0A1D6CPU8_WHEAT	Uncharacterized protein	SubName: Full=Uncharacterized protein {ECO:0000313|EnsemblPlants:TRIAE_CS42_7DL_TGACv1_603353_AA1981640.1};
TRINITY_DN28068_c0_g1_i8	tr|A0A1D6C248|A0A1D6C248_WHEAT	160	9.5e-75	289.3	46.7		A0A1D6C248_WHEAT	Uncharacterized protein	SubName: Full=Uncharacterized protein {ECO:0000313|EnsemblPlants:TRIAE_CS42_7BL_TGACv1_576822_AA1856140.1};
TRINITY_DN28068_c0_g1_i9	tr|A0A1D6CPU8|A0A1D6CPU8_WHEAT	95	1e-45	191	98.6		A0A1D6CPU8_WHEAT	Uncharacterized protein	SubName: Full=Uncharacterized protein {ECO:0000313|EnsemblPlants:TRIAE_CS42_7DL_TGACv1_603353_AA1981640.1};
TRINITY_DN28068_c0_g1_i7	tr|A0A1D6C4J7|A0A1D6C4J7_WHEAT	214	1e-71	278.9	77.3		A0A1D6C4J7_WHEAT	Uncharacterized protein	SubName: Full=Uncharacterized protein {ECO:0000313|EnsemblPlants:TRIAE_CS42_7BL_TGACv1_577274_AA1871030.1};
TRINITY_DN28068_c0_g1_i2	tr|A0A1D6BJ80|A0A1D6BJ80_WHEAT	140	2.8e-63	250.8	55		A0A1D6BJ80_WHEAT	Uncharacterized protein	SubName: Full=Uncharacterized protein {ECO:0000313|EnsemblPlants:TRIAE_CS42_7AL_TGACv1_556412_AA1762440.1};
TRINITY_DN28068_c0_g1_i11	tr|A0A1D6C4J7|A0A1D6C4J7_WHEAT	214	7.5e-72	279.6	63.6		A0A1D6C4J7_WHEAT	Uncharacterized protein	SubName: Full=Uncharacterized protein {ECO:0000313|EnsemblPlants:TRIAE_CS42_7BL_TGACv1_577274_AA1871030.1};
TRINITY_DN28068_c0_g2_i1	tr|A0A1D6BHF1|A0A1D6BHF1_WHEAT	172	1.4e-90	341.7	60.8		A0A1D6BHF1_WHEAT	Uncharacterized protein	SubName: Full=Uncharacterized protein {ECO:0000313|EnsemblPlants:TRIAE_CS42_7AL_TGACv1_556007_AA1752420.1};
TRINITY_DN28026_c0_g1_i2	tr|C6TIX6|C6TIX6_SOYBN	83	1.9e-26	127.1	82.8		C6TIX6_SOYBN	Tubulin beta chain	RecName: Full=Tubulin beta chain {ECO:0000256|RuleBase:RU000352};
TRINITY_DN28026_c0_g1_i1	tr|C6TIX6|C6TIX6_SOYBN	83	1.9e-26	127.1	80.4		C6TIX6_SOYBN	Tubulin beta chain	RecName: Full=Tubulin beta chain {ECO:0000256|RuleBase:RU000352};
TRINITY_DN28037_c0_g2_i1	tr|M7ZJU0|M7ZJU0_TRIUA	154	3e-47	196.8	99.6	ORFNames=TRIUR3_24704 {ECO:0000313|EMBL:EMS48364.1};	M7ZJU0_TRIUA	Cold shock protein CS66	SubName: Full=Cold shock protein CS66 {ECO:0000313|EMBL:EMS48364.1, ECO:0000313|EnsemblPlants:TRIUR3_24704-P1};
TRINITY_DN28037_c0_g3_i1	tr|Q9SBI7|Q9SBI7_HORVU	80	2.5e-10	73.9	59.5	Name=dhn5 {ECO:0000313|EMBL:AAD02262.1};	Q9SBI7_HORVU	Dehydrin 5	SubName: Full=Dehydrin 5 {ECO:0000313|EMBL:AAD02262.1};
TRINITY_DN28037_c0_g4_i1	tr|M8BS90|M8BS90_AEGTA	69	1.5e-09	70.5	99.5	ORFNames=F775_26667 {ECO:0000313|EMBL:EMT24839.1};	M8BS90_AEGTA	Dehydrin DHN3	SubName: Full=Dehydrin DHN3 {ECO:0000313|EMBL:EMT24839.1, ECO:0000313|EnsemblPlants:EMT24839};
TRINITY_DN28037_c0_g5_i1	tr|Q9SBI7|Q9SBI7_HORVU	70	1.1e-09	70.9	97.6	Name=dhn5 {ECO:0000313|EMBL:AAD02262.1};	Q9SBI7_HORVU	Dehydrin 5	SubName: Full=Dehydrin 5 {ECO:0000313|EMBL:AAD02262.1};
TRINITY_DN28037_c0_g5_i2	tr|M8CA44|M8CA44_AEGTA	79	2.3e-20	107.1	69.1	ORFNames=F775_26784 {ECO:0000313|EMBL:EMT30993.1};	M8CA44_AEGTA	Dehydrin DHN2	SubName: Full=Dehydrin DHN2 {ECO:0000313|EMBL:EMT30993.1, ECO:0000313|EnsemblPlants:EMT30993};
TRINITY_DN28037_c0_g6_i1	tr|A1IVM4|A1IVM4_TRITD	36	5e-09	68.9	43.9	Name=DHN13 {ECO:0000313|EMBL:CAJ56063.1};	A1IVM4_TRITD	Dehydrin 5	SubName: Full=Dehydrin 5 {ECO:0000313|EMBL:CAJ56063.1}; Flags: Fragment;
TRINITY_DN28037_c0_g8_i1	tr|A0A193BIK2|A0A193BIK2_WHEAT	91	2.1e-26	127.1	82.7	Name=wzy2-1 {ECO:0000313|EMBL:ANN11756.1};	A0A193BIK2_WHEAT	WZY2-1 protein	SubName: Full=WZY2-1 protein {ECO:0000313|EMBL:ANN11756.1};
TRINITY_DN28037_c2_g1_i1	tr|A0A1D7PVC7|A0A1D7PVC7_WHEAT	70	4.9e-08	65.9	73.9	Name=DHN2 {ECO:0000313|EMBL:AOM63238.1};	A0A1D7PVC7_WHEAT	Salt-induced YSK2 dehydrin 2	SubName: Full=Salt-induced YSK2 dehydrin 2 {ECO:0000313|EMBL:AOM63238.1};
TRINITY_DN28065_c0_g1_i1	tr|A0A1D6S0P3|A0A1D6S0P3_WHEAT	1214	0	1568.1	49		A0A1D6S0P3_WHEAT	Uncharacterized protein	SubName: Full=Uncharacterized protein {ECO:0000313|EnsemblPlants:TRIAE_CS42_4DS_TGACv1_362371_AA1179250.1};
TRINITY_DN28065_c0_g2_i1	tr|A0A1D6A138|A0A1D6A138_WHEAT	284	4.2e-104	387.1	69.1		A0A1D6A138_WHEAT	Uncharacterized protein	SubName: Full=Uncharacterized protein {ECO:0000313|EnsemblPlants:TRIAE_CS42_5DS_TGACv1_456749_AA1477440.1};
TRINITY_DN28039_c1_g1_i6	tr|A0A1D6ANX9|A0A1D6ANX9_WHEAT	214	1.3e-05	59.7	61.3		A0A1D6ANX9_WHEAT	Uncharacterized protein	SubName: Full=Uncharacterized protein {ECO:0000313|EnsemblPlants:TRIAE_CS42_6BL_TGACv1_500204_AA1601070.1};
TRINITY_DN28016_c0_g1_i1	tr|M7YZ35|M7YZ35_TRIUA	51	1.3e-05	58.2	41.6	ORFNames=TRIUR3_03032 {ECO:0000313|EMBL:EMS56068.1};	M7YZ35_TRIUA	Uncharacterized protein	SubName: Full=Uncharacterized protein {ECO:0000313|EMBL:EMS56068.1, ECO:0000313|EnsemblPlants:TRIUR3_03032-P1};
TRINITY_DN28016_c1_g1_i1	tr|A0A1D6S1N3|A0A1D6S1N3_WHEAT	70	1.1e-15	90.9	99.1		A0A1D6S1N3_WHEAT	Uncharacterized protein	SubName: Full=Uncharacterized protein {ECO:0000313|EnsemblPlants:TRIAE_CS42_5AL_TGACv1_375999_AA1230460.1};
TRINITY_DN28097_c0_g1_i1	tr|A0A1D5T6F9|A0A1D5T6F9_WHEAT	87	1.4e-41	177.2	98.9		A0A1D5T6F9_WHEAT	Uncharacterized protein	SubName: Full=Uncharacterized protein {ECO:0000313|EnsemblPlants:TRIAE_CS42_2AL_TGACv1_093116_AA0272340.1};
TRINITY_DN28031_c0_g1_i2	tr|M0X1J3|M0X1J3_HORVV	32	1.3e-09	70.9	39.7		M0X1J3_HORVV	Uncharacterized protein	SubName: Full=Uncharacterized protein {ECO:0000313|EnsemblPlants:HORVU1Hr1G066630.2};
TRINITY_DN28031_c0_g1_i1	tr|W4ZN93|W4ZN93_WHEAT	72	7.8e-14	84.7	99.5	Name=B2 {ECO:0000313|EMBL:AKG95531.1};	W4ZN93_WHEAT	B2 protein	SubName: Full=B2 protein {ECO:0000313|EMBL:AKG95531.1, ECO:0000313|EnsemblPlants:TRIAE_CS42_1AL_TGACv1_001984_AA0037460.1};
TRINITY_DN28066_c0_g1_i1	tr|N1QZU1|N1QZU1_AEGTA	609	1.5e-265	924.5	72.8	ORFNames=F775_15879 {ECO:0000313|EMBL:EMT17880.1};	N1QZU1_AEGTA	Uncharacterized protein	SubName: Full=Uncharacterized protein {ECO:0000313|EMBL:EMT17880.1, ECO:0000313|EnsemblPlants:EMT17880};
TRINITY_DN28066_c0_g1_i6	tr|A0A1D5UQ64|A0A1D5UQ64_WHEAT	464	5.8e-276	958.7	67.3		A0A1D5UQ64_WHEAT	Uncharacterized protein	SubName: Full=Uncharacterized protein {ECO:0000313|EnsemblPlants:TRIAE_CS42_2DL_TGACv1_159999_AA0545380.2};
TRINITY_DN28066_c0_g1_i8	tr|A0A1D5UQ64|A0A1D5UQ64_WHEAT	464	4.3e-273	949.1	71.1		A0A1D5UQ64_WHEAT	Uncharacterized protein	SubName: Full=Uncharacterized protein {ECO:0000313|EnsemblPlants:TRIAE_CS42_2DL_TGACv1_159999_AA0545380.2};
TRINITY_DN28066_c0_g1_i3	tr|N1QZU1|N1QZU1_AEGTA	405	2.1e-149	538.1	68.3	ORFNames=F775_15879 {ECO:0000313|EMBL:EMT17880.1};	N1QZU1_AEGTA	Uncharacterized protein	SubName: Full=Uncharacterized protein {ECO:0000313|EMBL:EMT17880.1, ECO:0000313|EnsemblPlants:EMT17880};
TRINITY_DN28066_c0_g1_i5	tr|A0A1D5UQ64|A0A1D5UQ64_WHEAT	260	1.9e-152	548.5	36.7		A0A1D5UQ64_WHEAT	Uncharacterized protein	SubName: Full=Uncharacterized protein {ECO:0000313|EnsemblPlants:TRIAE_CS42_2DL_TGACv1_159999_AA0545380.2};
TRINITY_DN28087_c0_g1_i1	tr|A0A1D6CL84|A0A1D6CL84_WHEAT	61	1.2e-24	122.1	29.8		A0A1D6CL84_WHEAT	Uncharacterized protein	SubName: Full=Uncharacterized protein {ECO:0000313|EnsemblPlants:TRIAE_CS42_7DL_TGACv1_602649_AA1963830.1};
TRINITY_DN28087_c0_g3_i4	tr|A0A287K401|A0A287K401_HORVV	76	3.3e-26	128.6	15.2		A0A287K401_HORVV	Uncharacterized protein	SubName: Full=Uncharacterized protein {ECO:0000313|EnsemblPlants:HORVU3Hr1G011910.6};
TRINITY_DN28087_c0_g3_i6	tr|A0A1D5T1K8|A0A1D5T1K8_WHEAT	44	2.5e-11	78.2	18		A0A1D5T1K8_WHEAT	Uncharacterized protein	SubName: Full=Uncharacterized protein {ECO:0000313|EnsemblPlants:TRIAE_CS42_1DS_TGACv1_080193_AA0242760.1};
TRINITY_DN28087_c0_g3_i2	tr|A0A287K401|A0A287K401_HORVV	76	4.8e-26	128.6	10.2		A0A287K401_HORVV	Uncharacterized protein	SubName: Full=Uncharacterized protein {ECO:0000313|EnsemblPlants:HORVU3Hr1G011910.6};
TRINITY_DN28087_c0_g3_i1	tr|A0A287K401|A0A287K401_HORVV	100	4e-26	128.6	16.4		A0A287K401_HORVV	Uncharacterized protein	SubName: Full=Uncharacterized protein {ECO:0000313|EnsemblPlants:HORVU3Hr1G011910.6};
TRINITY_DN28087_c0_g3_i5	tr|A0A1D5T1K8|A0A1D5T1K8_WHEAT	39	8e-10	72.8	20.5		A0A1D5T1K8_WHEAT	Uncharacterized protein	SubName: Full=Uncharacterized protein {ECO:0000313|EnsemblPlants:TRIAE_CS42_1DS_TGACv1_080193_AA0242760.1};
TRINITY_DN28087_c0_g4_i2	tr|A0A1D6CL84|A0A1D6CL84_WHEAT	43	3.3e-09	70.1	36		A0A1D6CL84_WHEAT	Uncharacterized protein	SubName: Full=Uncharacterized protein {ECO:0000313|EnsemblPlants:TRIAE_CS42_7DL_TGACv1_602649_AA1963830.1};
TRINITY_DN28087_c0_g4_i1	tr|A0A1D6CL84|A0A1D6CL84_WHEAT	69	1.1e-07	65.1	53.5		A0A1D6CL84_WHEAT	Uncharacterized protein	SubName: Full=Uncharacterized protein {ECO:0000313|EnsemblPlants:TRIAE_CS42_7DL_TGACv1_602649_AA1963830.1};
TRINITY_DN28087_c3_g1_i4	tr|A0A1D5TA38|A0A1D5TA38_WHEAT	75	8.7e-06	60.8	14.3		A0A1D5TA38_WHEAT	Uncharacterized protein	SubName: Full=Uncharacterized protein {ECO:0000313|EnsemblPlants:TRIAE_CS42_2AL_TGACv1_093970_AA0290390.1};
TRINITY_DN28087_c3_g1_i3	tr|A0A1D5TA38|A0A1D5TA38_WHEAT	75	8.7e-06	60.8	14.3		A0A1D5TA38_WHEAT	Uncharacterized protein	SubName: Full=Uncharacterized protein {ECO:0000313|EnsemblPlants:TRIAE_CS42_2AL_TGACv1_093970_AA0290390.1};
TRINITY_DN28076_c0_g1_i2	tr|A0A0P6BLZ3|A0A0P6BLZ3_9CRUS	40	2.3e-06	60.5	37.9		A0A0P6BLZ3_9CRUS	Uncharacterized protein	SubName: Full=Uncharacterized protein {ECO:0000313|EMBL:JAM87583.1}; Flags: Fragment;
TRINITY_DN28076_c0_g1_i1	tr|E0XS38|E0XS38_9PROT	102	4.8e-12	79.3	86.5		E0XS38_9PROT	Uncharacterized protein	SubName: Full=Uncharacterized protein {ECO:0000313|EMBL:ADI17229.1}; Flags: Fragment;
TRINITY_DN28076_c0_g2_i3	tr|A0A1M9Q8J9|A0A1M9Q8J9_9MYCO	74	3.4e-19	103.6	48.7	ORFNames=SAMEA2259654_06543 {ECO:0000313|EMBL:SKT95827.1}, SAMEA2259684_02675 {ECO:0000313|EMBL:SHT70389.1}, SAMEA2275847_02452 {ECO:0000313|EMBL:SKU06598.1};	A0A1M9Q8J9_9MYCO	Uncharacterized protein	SubName: Full=Uncharacterized protein {ECO:0000313|EMBL:SHT70389.1};
TRINITY_DN28076_c0_g2_i2	tr|D9VQ27|D9VQ27_9ACTN	104	4.8e-21	109.8	64.8	ORFNames=SSNG_03091 {ECO:0000313|EMBL:EFL15839.1}, SSNG_03735 {ECO:0000313|EMBL:EFL16483.1};	D9VQ27_9ACTN	Uncharacterized protein	SubName: Full=Uncharacterized protein {ECO:0000313|EMBL:EFL16483.1};
TRINITY_DN28076_c0_g2_i6	tr|A0A1I7SXW9|A0A1I7SXW9_9PELO	63	4.8e-24	119.8	39.7		A0A1I7SXW9_9PELO	Uncharacterized protein	SubName: Full=Uncharacterized protein {ECO:0000313|WBParaSite:Csp11.Scaffold200.g669.t1};
TRINITY_DN28076_c0_g2_i4	tr|D9VQ27|D9VQ27_9ACTN	137	4.4e-40	173.3	71.9	ORFNames=SSNG_03091 {ECO:0000313|EMBL:EFL15839.1}, SSNG_03735 {ECO:0000313|EMBL:EFL16483.1};	D9VQ27_9ACTN	Uncharacterized protein	SubName: Full=Uncharacterized protein {ECO:0000313|EMBL:EFL16483.1};
TRINITY_DN28076_c0_g2_i7	tr|A0A1I7SXW9|A0A1I7SXW9_9PELO	63	2.8e-24	120.6	39.7		A0A1I7SXW9_9PELO	Uncharacterized protein	SubName: Full=Uncharacterized protein {ECO:0000313|WBParaSite:Csp11.Scaffold200.g669.t1};
TRINITY_DN28076_c0_g2_i5	tr|A0A1I7SXW9|A0A1I7SXW9_9PELO	63	5.7e-24	119.8	33.5		A0A1I7SXW9_9PELO	Uncharacterized protein	SubName: Full=Uncharacterized protein {ECO:0000313|WBParaSite:Csp11.Scaffold200.g669.t1};
TRINITY_DN28076_c0_g2_i1	tr|A0A0U5BU83|A0A0U5BU83_9MICO	61	4.4e-22	112.8	51	ORFNames=MalAC0309_1154 {ECO:0000313|EMBL:BAU32013.1};	A0A0U5BU83_9MICO	Uncharacterized protein	SubName: Full=Uncharacterized protein {ECO:0000313|EMBL:BAU32013.1};
TRINITY_DN28076_c0_g3_i1	tr|A0A174ZID1|A0A174ZID1_CLOIN	127	3.6e-32	146.7	80.9	ORFNames=ERS852468_01750 {ECO:0000313|EMBL:CUQ87085.1};	A0A174ZID1_CLOIN	Uncharacterized protein	SubName: Full=Uncharacterized protein {ECO:0000313|EMBL:CUQ87085.1};
TRINITY_DN28053_c0_g1_i5	tr|A0A1D5SQ90|A0A1D5SQ90_WHEAT	96	7.7e-45	189.1	50.3		A0A1D5SQ90_WHEAT	Uncharacterized protein	SubName: Full=Uncharacterized protein {ECO:0000313|EnsemblPlants:TRIAE_CS42_1DL_TGACv1_061143_AA0186780.1};
TRINITY_DN28053_c0_g1_i4	tr|A0A287FVZ6|A0A287FVZ6_HORVV	425	3.4e-190	673.7	68.3		A0A287FVZ6_HORVV	Uncharacterized protein	SubName: Full=Uncharacterized protein {ECO:0000313|EnsemblPlants:HORVU1Hr1G061790.1};
TRINITY_DN28053_c0_g1_i3	tr|A0A287FVZ6|A0A287FVZ6_HORVV	425	3.4e-190	673.7	67.4		A0A287FVZ6_HORVV	Uncharacterized protein	SubName: Full=Uncharacterized protein {ECO:0000313|EnsemblPlants:HORVU1Hr1G061790.1};
TRINITY_DN28053_c0_g1_i1	tr|A0A287FVZ6|A0A287FVZ6_HORVV	425	1.5e-190	674.9	67.4		A0A287FVZ6_HORVV	Uncharacterized protein	SubName: Full=Uncharacterized protein {ECO:0000313|EnsemblPlants:HORVU1Hr1G061790.1};
TRINITY_DN28053_c0_g1_i2	tr|A0A287FVZ6|A0A287FVZ6_HORVV	376	1.7e-162	581.3	80.4		A0A287FVZ6_HORVV	Uncharacterized protein	SubName: Full=Uncharacterized protein {ECO:0000313|EnsemblPlants:HORVU1Hr1G061790.1};
TRINITY_DN28053_c0_g2_i1	tr|F2CS46|F2CS46_HORVV	83	8e-36	158.3	79		F2CS46_HORVV	Predicted protein	SubName: Full=Predicted protein {ECO:0000313|EMBL:BAJ85667.1};
TRINITY_DN28081_c0_g1_i7	tr|F2E9G2|F2E9G2_HORVV	485	2.3e-160	575.1	56.3		F2E9G2_HORVV	Predicted protein	SubName: Full=Predicted protein {ECO:0000313|EMBL:BAK03984.1, ECO:0000313|EnsemblPlants:HORVU5Hr1G097140.1};
TRINITY_DN28081_c0_g1_i5	tr|F2E9G2|F2E9G2_HORVV	485	2.1e-159	572	50.4		F2E9G2_HORVV	Predicted protein	SubName: Full=Predicted protein {ECO:0000313|EMBL:BAK03984.1, ECO:0000313|EnsemblPlants:HORVU5Hr1G097140.1};
TRINITY_DN28081_c0_g1_i4	tr|F2E9G2|F2E9G2_HORVV	485	2.7e-159	572	39.3		F2E9G2_HORVV	Predicted protein	SubName: Full=Predicted protein {ECO:0000313|EMBL:BAK03984.1, ECO:0000313|EnsemblPlants:HORVU5Hr1G097140.1};
TRINITY_DN28081_c0_g1_i8	tr|A0A0A8YCP8|A0A0A8YCP8_ARUDO	122	6.6e-42	180.3	34.7		A0A0A8YCP8_ARUDO	Uncharacterized protein	SubName: Full=Uncharacterized protein {ECO:0000313|EMBL:JAD23300.1};
TRINITY_DN28081_c0_g1_i9	tr|F2E9G2|F2E9G2_HORVV	485	3.3e-160	575.1	39.1		F2E9G2_HORVV	Predicted protein	SubName: Full=Predicted protein {ECO:0000313|EMBL:BAK03984.1, ECO:0000313|EnsemblPlants:HORVU5Hr1G097140.1};
TRINITY_DN28081_c0_g1_i10	tr|F2E9G2|F2E9G2_HORVV	485	2.9e-160	575.1	43.1		F2E9G2_HORVV	Predicted protein	SubName: Full=Predicted protein {ECO:0000313|EMBL:BAK03984.1, ECO:0000313|EnsemblPlants:HORVU5Hr1G097140.1};
TRINITY_DN28081_c0_g1_i11	tr|F2E9G2|F2E9G2_HORVV	485	2.2e-159	572	48.6		F2E9G2_HORVV	Predicted protein	SubName: Full=Predicted protein {ECO:0000313|EMBL:BAK03984.1, ECO:0000313|EnsemblPlants:HORVU5Hr1G097140.1};
TRINITY_DN28061_c0_g1_i6	tr|A0A1D5ZU26|A0A1D5ZU26_WHEAT	106	6.7e-49	203.8	25.2		A0A1D5ZU26_WHEAT	Uncharacterized protein	SubName: Full=Uncharacterized protein {ECO:0000313|EnsemblPlants:TRIAE_CS42_5DL_TGACv1_434903_AA1443390.1};
TRINITY_DN28061_c0_g1_i4	tr|Q8LRU5|Q8LRU5_WHEAT	135	2.3e-49	205.3	32.1	Name=HMGa {ECO:0000313|EMBL:AAM22691.1};	Q8LRU5_WHEAT	HMG-I/Y protein HMGa	SubName: Full=HMG-I/Y protein HMGa {ECO:0000313|EMBL:AAM22691.1, ECO:0000313|EnsemblPlants:TRIAE_CS42_5BL_TGACv1_404253_AA1292440.1};
TRINITY_DN28061_c0_g1_i1	tr|A0A1D5ZU26|A0A1D5ZU26_WHEAT	105	1.9e-48	202.2	25		A0A1D5ZU26_WHEAT	Uncharacterized protein	SubName: Full=Uncharacterized protein {ECO:0000313|EnsemblPlants:TRIAE_CS42_5DL_TGACv1_434903_AA1443390.1};
TRINITY_DN28061_c0_g1_i3	tr|A0A1D5ZU26|A0A1D5ZU26_WHEAT	104	4.3e-48	201.1	24.7		A0A1D5ZU26_WHEAT	Uncharacterized protein	SubName: Full=Uncharacterized protein {ECO:0000313|EnsemblPlants:TRIAE_CS42_5DL_TGACv1_434903_AA1443390.1};
TRINITY_DN28061_c0_g1_i2	tr|Q8LRU5|Q8LRU5_WHEAT	138	4.5e-53	217.6	32.9	Name=HMGa {ECO:0000313|EMBL:AAM22691.1};	Q8LRU5_WHEAT	HMG-I/Y protein HMGa	SubName: Full=HMG-I/Y protein HMGa {ECO:0000313|EMBL:AAM22691.1, ECO:0000313|EnsemblPlants:TRIAE_CS42_5BL_TGACv1_404253_AA1292440.1};
TRINITY_DN28061_c0_g2_i1	tr|A0A1D5ZU26|A0A1D5ZU26_WHEAT	118	8.8e-21	108.6	93.4		A0A1D5ZU26_WHEAT	Uncharacterized protein	SubName: Full=Uncharacterized protein {ECO:0000313|EnsemblPlants:TRIAE_CS42_5DL_TGACv1_434903_AA1443390.1};
TRINITY_DN28017_c0_g1_i1	tr|A0A1D6AB57|A0A1D6AB57_WHEAT	285	2.4e-151	543.5	99.7		A0A1D6AB57_WHEAT	Uncharacterized protein	SubName: Full=Uncharacterized protein {ECO:0000313|EnsemblPlants:TRIAE_CS42_6AL_TGACv1_472828_AA1526400.1};
TRINITY_DN28017_c0_g2_i1	tr|M7Z130|M7Z130_TRIUA	89	2.1e-32	146.7	97.4	ORFNames=TRIUR3_00946 {ECO:0000313|EMBL:EMS53151.1};	M7Z130_TRIUA	Disease resistance RPP8-like protein 3	SubName: Full=Disease resistance RPP8-like protein 3 {ECO:0000313|EMBL:EMS53151.1, ECO:0000313|EnsemblPlants:TRIUR3_00946-P1};
TRINITY_DN28017_c0_g3_i1	tr|A0A287V0B4|A0A287V0B4_HORVV	122	4.2e-44	186	99.2		A0A287V0B4_HORVV	Uncharacterized protein	SubName: Full=Uncharacterized protein {ECO:0000313|EnsemblPlants:HORVU6Hr1G084870.3};
TRINITY_DN28008_c0_g1_i1	tr|M8B451|M8B451_TRIUA	31	2e-09	71.2	19	ORFNames=TRIUR3_28030 {ECO:0000313|EMBL:EMS68384.1};	M8B451_TRIUA	Transcription factor GTE11	SubName: Full=Transcription factor GTE11 {ECO:0000313|EMBL:EMS68384.1, ECO:0000313|EnsemblPlants:TRIUR3_28030-P1};
TRINITY_DN28008_c1_g1_i1	tr|A0A1D5W333|A0A1D5W333_WHEAT	79	4.2e-23	115.5	99.5		A0A1D5W333_WHEAT	Uncharacterized protein	SubName: Full=Uncharacterized protein {ECO:0000313|EnsemblPlants:TRIAE_CS42_3B_TGACv1_223728_AA0786280.1};
TRINITY_DN28008_c1_g2_i1	tr|A0A1D5W333|A0A1D5W333_WHEAT	83	9.1e-30	137.9	96.9		A0A1D5W333_WHEAT	Uncharacterized protein	SubName: Full=Uncharacterized protein {ECO:0000313|EnsemblPlants:TRIAE_CS42_3B_TGACv1_223728_AA0786280.1};
TRINITY_DN28008_c1_g2_i2	tr|A0A1D5W333|A0A1D5W333_WHEAT	83	3.4e-26	125.9	96.7		A0A1D5W333_WHEAT	Uncharacterized protein	SubName: Full=Uncharacterized protein {ECO:0000313|EnsemblPlants:TRIAE_CS42_3B_TGACv1_223728_AA0786280.1};
TRINITY_DN28008_c1_g3_i1	tr|M7YXT6|M7YXT6_TRIUA	59	3e-21	110.9	27.2	ORFNames=TRIUR3_28544 {ECO:0000313|EMBL:EMS51981.1};	M7YXT6_TRIUA	Uncharacterized protein	SubName: Full=Uncharacterized protein {ECO:0000313|EMBL:EMS51981.1, ECO:0000313|EnsemblPlants:TRIUR3_28544-P1};
TRINITY_DN28008_c3_g1_i1	tr|F2DB14|F2DB14_HORVV	57	2.4e-05	58.5	19.3		F2DB14_HORVV	Predicted protein	SubName: Full=Predicted protein {ECO:0000313|EMBL:BAJ92285.1};
TRINITY_DN28074_c0_g1_i3	tr|A0A1D6ALH6|A0A1D6ALH6_WHEAT	222	1.1e-120	441.8	71.5		A0A1D6ALH6_WHEAT	Very-long-chain (3R)-3-hydroxyacyl-CoA dehydratase	RecName: Full=Very-long-chain (3R)-3-hydroxyacyl-CoA dehydratase {ECO:0000256|RuleBase:RU363109}; EC=4.2.1.134 {ECO:0000256|RuleBase:RU363109};
TRINITY_DN28074_c0_g1_i1	tr|A0A1D6ALH6|A0A1D6ALH6_WHEAT	160	2.3e-85	325.9	19.6		A0A1D6ALH6_WHEAT	Very-long-chain (3R)-3-hydroxyacyl-CoA dehydratase	RecName: Full=Very-long-chain (3R)-3-hydroxyacyl-CoA dehydratase {ECO:0000256|RuleBase:RU363109}; EC=4.2.1.134 {ECO:0000256|RuleBase:RU363109};
TRINITY_DN28074_c0_g1_i10	tr|A0A1D6ALH6|A0A1D6ALH6_WHEAT	222	9.7e-121	442.2	60.9		A0A1D6ALH6_WHEAT	Very-long-chain (3R)-3-hydroxyacyl-CoA dehydratase	RecName: Full=Very-long-chain (3R)-3-hydroxyacyl-CoA dehydratase {ECO:0000256|RuleBase:RU363109}; EC=4.2.1.134 {ECO:0000256|RuleBase:RU363109};
TRINITY_DN28074_c0_g1_i15	tr|A0A1D6ALH6|A0A1D6ALH6_WHEAT	160	2.7e-85	325.5	21.4		A0A1D6ALH6_WHEAT	Very-long-chain (3R)-3-hydroxyacyl-CoA dehydratase	RecName: Full=Very-long-chain (3R)-3-hydroxyacyl-CoA dehydratase {ECO:0000256|RuleBase:RU363109}; EC=4.2.1.134 {ECO:0000256|RuleBase:RU363109};
TRINITY_DN28074_c0_g1_i21	tr|A0A1D6ALH6|A0A1D6ALH6_WHEAT	154	3.1e-67	263.8	56.3		A0A1D6ALH6_WHEAT	Very-long-chain (3R)-3-hydroxyacyl-CoA dehydratase	RecName: Full=Very-long-chain (3R)-3-hydroxyacyl-CoA dehydratase {ECO:0000256|RuleBase:RU363109}; EC=4.2.1.134 {ECO:0000256|RuleBase:RU363109};
TRINITY_DN28074_c0_g1_i20	tr|A0A1D6ALH6|A0A1D6ALH6_WHEAT	160	1.7e-85	326.2	20.3		A0A1D6ALH6_WHEAT	Very-long-chain (3R)-3-hydroxyacyl-CoA dehydratase	RecName: Full=Very-long-chain (3R)-3-hydroxyacyl-CoA dehydratase {ECO:0000256|RuleBase:RU363109}; EC=4.2.1.134 {ECO:0000256|RuleBase:RU363109};
TRINITY_DN28074_c0_g1_i19	tr|A0A1D6ALH6|A0A1D6ALH6_WHEAT	222	1.5e-115	424.9	63.4		A0A1D6ALH6_WHEAT	Very-long-chain (3R)-3-hydroxyacyl-CoA dehydratase	RecName: Full=Very-long-chain (3R)-3-hydroxyacyl-CoA dehydratase {ECO:0000256|RuleBase:RU363109}; EC=4.2.1.134 {ECO:0000256|RuleBase:RU363109};
TRINITY_DN28074_c0_g1_i17	tr|A0A1D6ALH6|A0A1D6ALH6_WHEAT	222	5.9e-121	443	58.7		A0A1D6ALH6_WHEAT	Very-long-chain (3R)-3-hydroxyacyl-CoA dehydratase	RecName: Full=Very-long-chain (3R)-3-hydroxyacyl-CoA dehydratase {ECO:0000256|RuleBase:RU363109}; EC=4.2.1.134 {ECO:0000256|RuleBase:RU363109};
TRINITY_DN28074_c0_g1_i6	tr|A0A1D6ALH6|A0A1D6ALH6_WHEAT	137	3.8e-72	282	16.7		A0A1D6ALH6_WHEAT	Very-long-chain (3R)-3-hydroxyacyl-CoA dehydratase	RecName: Full=Very-long-chain (3R)-3-hydroxyacyl-CoA dehydratase {ECO:0000256|RuleBase:RU363109}; EC=4.2.1.134 {ECO:0000256|RuleBase:RU363109};
TRINITY_DN28074_c0_g1_i4	tr|A0A1D6ALH6|A0A1D6ALH6_WHEAT	222	6.7e-121	442.6	66.9		A0A1D6ALH6_WHEAT	Very-long-chain (3R)-3-hydroxyacyl-CoA dehydratase	RecName: Full=Very-long-chain (3R)-3-hydroxyacyl-CoA dehydratase {ECO:0000256|RuleBase:RU363109}; EC=4.2.1.134 {ECO:0000256|RuleBase:RU363109};
TRINITY_DN28074_c0_g1_i22	tr|A0A1D6ALH6|A0A1D6ALH6_WHEAT	222	1.4e-115	424.9	68.4		A0A1D6ALH6_WHEAT	Very-long-chain (3R)-3-hydroxyacyl-CoA dehydratase	RecName: Full=Very-long-chain (3R)-3-hydroxyacyl-CoA dehydratase {ECO:0000256|RuleBase:RU363109}; EC=4.2.1.134 {ECO:0000256|RuleBase:RU363109};
TRINITY_DN28074_c0_g1_i23	tr|A0A1D6ALH6|A0A1D6ALH6_WHEAT	222	6.1e-121	443	57		A0A1D6ALH6_WHEAT	Very-long-chain (3R)-3-hydroxyacyl-CoA dehydratase	RecName: Full=Very-long-chain (3R)-3-hydroxyacyl-CoA dehydratase {ECO:0000256|RuleBase:RU363109}; EC=4.2.1.134 {ECO:0000256|RuleBase:RU363109};
TRINITY_DN28074_c0_g1_i16	tr|A0A1D6ALH6|A0A1D6ALH6_WHEAT	154	2e-67	264.6	51		A0A1D6ALH6_WHEAT	Very-long-chain (3R)-3-hydroxyacyl-CoA dehydratase	RecName: Full=Very-long-chain (3R)-3-hydroxyacyl-CoA dehydratase {ECO:0000256|RuleBase:RU363109}; EC=4.2.1.134 {ECO:0000256|RuleBase:RU363109};
TRINITY_DN28074_c0_g1_i8	tr|A0A1D6ALH6|A0A1D6ALH6_WHEAT	160	2.7e-85	325.5	21.1		A0A1D6ALH6_WHEAT	Very-long-chain (3R)-3-hydroxyacyl-CoA dehydratase	RecName: Full=Very-long-chain (3R)-3-hydroxyacyl-CoA dehydratase {ECO:0000256|RuleBase:RU363109}; EC=4.2.1.134 {ECO:0000256|RuleBase:RU363109};
TRINITY_DN28074_c0_g1_i14	tr|A0A1D6ALH6|A0A1D6ALH6_WHEAT	137	3.4e-72	282	18.7		A0A1D6ALH6_WHEAT	Very-long-chain (3R)-3-hydroxyacyl-CoA dehydratase	RecName: Full=Very-long-chain (3R)-3-hydroxyacyl-CoA dehydratase {ECO:0000256|RuleBase:RU363109}; EC=4.2.1.134 {ECO:0000256|RuleBase:RU363109};
TRINITY_DN28074_c0_g1_i11	tr|A0A1D6ALH6|A0A1D6ALH6_WHEAT	160	1.8e-85	326.2	18.5		A0A1D6ALH6_WHEAT	Very-long-chain (3R)-3-hydroxyacyl-CoA dehydratase	RecName: Full=Very-long-chain (3R)-3-hydroxyacyl-CoA dehydratase {ECO:0000256|RuleBase:RU363109}; EC=4.2.1.134 {ECO:0000256|RuleBase:RU363109};
TRINITY_DN28080_c0_g1_i1	tr|A0A1D5T4D7|A0A1D5T4D7_WHEAT	33	2e-06	60.8	27		A0A1D5T4D7_WHEAT	Uncharacterized protein	SubName: Full=Uncharacterized protein {ECO:0000313|EnsemblPlants:TRIAE_CS42_1DS_TGACv1_081270_AA0259380.1};
TRINITY_DN28080_c0_g3_i1	tr|A0A1D6CE19|A0A1D6CE19_WHEAT	73	6.3e-05	57.4	21.3		A0A1D6CE19_WHEAT	Ubiquitinyl hydrolase 1	RecName: Full=Ubiquitinyl hydrolase 1 {ECO:0000256|SAAS:SAAS00003083}; EC=3.4.19.12 {ECO:0000256|SAAS:SAAS00003083};
TRINITY_DN28077_c0_g1_i5	tr|A0A1D5WIY9|A0A1D5WIY9_WHEAT	268	3e-160	574.3	39.8		A0A1D5WIY9_WHEAT	Uncharacterized protein	SubName: Full=Uncharacterized protein {ECO:0000313|EnsemblPlants:TRIAE_CS42_3DL_TGACv1_250518_AA0869620.2};
TRINITY_DN28077_c0_g1_i1	tr|A0A1D5YFN4|A0A1D5YFN4_WHEAT	241	5.7e-109	402.5	94.5		A0A1D5YFN4_WHEAT	Uncharacterized protein	SubName: Full=Uncharacterized protein {ECO:0000313|EnsemblPlants:TRIAE_CS42_5AL_TGACv1_374728_AA1207640.1};
TRINITY_DN28077_c0_g1_i3	tr|A0A1D5WIY8|A0A1D5WIY8_WHEAT	472	1.1e-280	974.5	66.9		A0A1D5WIY8_WHEAT	Uncharacterized protein	SubName: Full=Uncharacterized protein {ECO:0000313|EnsemblPlants:TRIAE_CS42_3DL_TGACv1_250518_AA0869620.1};
TRINITY_DN28077_c0_g1_i2	tr|A0A1D5WIY8|A0A1D5WIY8_WHEAT	236	1.8e-99	371.7	55.1		A0A1D5WIY8_WHEAT	Uncharacterized protein	SubName: Full=Uncharacterized protein {ECO:0000313|EnsemblPlants:TRIAE_CS42_3DL_TGACv1_250518_AA0869620.1};
TRINITY_DN28077_c0_g1_i4	tr|A0A1D5V6I0|A0A1D5V6I0_WHEAT	137	4.8e-71	276.9	42.1		A0A1D5V6I0_WHEAT	Uncharacterized protein	SubName: Full=Uncharacterized protein {ECO:0000313|EnsemblPlants:TRIAE_CS42_3AL_TGACv1_194097_AA0626420.1};
TRINITY_DN28077_c0_g3_i3	tr|A0A1D5V8L6|A0A1D5V8L6_WHEAT	218	1.8e-106	394	99.5		A0A1D5V8L6_WHEAT	Uncharacterized protein	SubName: Full=Uncharacterized protein {ECO:0000313|EnsemblPlants:TRIAE_CS42_3AL_TGACv1_194557_AA0635780.1};
TRINITY_DN28077_c0_g3_i1	tr|M8C9Y9|M8C9Y9_AEGTA	138	1.3e-76	295	56.8	ORFNames=F775_18144 {ECO:0000313|EMBL:EMT30928.1};	M8C9Y9_AEGTA	Wall-associated receptor kinase 5	SubName: Full=Wall-associated receptor kinase 5 {ECO:0000313|EMBL:EMT30928.1, ECO:0000313|EnsemblPlants:EMT30928};
TRINITY_DN28077_c0_g3_i2	tr|M8C9Y9|M8C9Y9_AEGTA	271	3.9e-159	569.3	99.5	ORFNames=F775_18144 {ECO:0000313|EMBL:EMT30928.1};	M8C9Y9_AEGTA	Wall-associated receptor kinase 5	SubName: Full=Wall-associated receptor kinase 5 {ECO:0000313|EMBL:EMT30928.1, ECO:0000313|EnsemblPlants:EMT30928};
TRINITY_DN28077_c0_g4_i1	tr|A0A1D5V8J9|A0A1D5V8J9_WHEAT	189	1.3e-105	391	99		A0A1D5V8J9_WHEAT	Uncharacterized protein	SubName: Full=Uncharacterized protein {ECO:0000313|EnsemblPlants:TRIAE_CS42_3AL_TGACv1_194549_AA0635520.2};
TRINITY_DN28077_c1_g1_i1	tr|A0A1D5WD57|A0A1D5WD57_WHEAT	108	4.9e-19	102.1	98.7		A0A1D5WD57_WHEAT	Uncharacterized protein	SubName: Full=Uncharacterized protein {ECO:0000313|EnsemblPlants:TRIAE_CS42_3DL_TGACv1_249184_AA0840640.1};
TRINITY_DN28077_c1_g2_i2	tr|A0A1D5WD57|A0A1D5WD57_WHEAT	112	1.3e-60	241.5	61.3		A0A1D5WD57_WHEAT	Uncharacterized protein	SubName: Full=Uncharacterized protein {ECO:0000313|EnsemblPlants:TRIAE_CS42_3DL_TGACv1_249184_AA0840640.1};
TRINITY_DN28077_c1_g2_i1	tr|A0A1D5WD57|A0A1D5WD57_WHEAT	101	1e-52	214.9	69.7		A0A1D5WD57_WHEAT	Uncharacterized protein	SubName: Full=Uncharacterized protein {ECO:0000313|EnsemblPlants:TRIAE_CS42_3DL_TGACv1_249184_AA0840640.1};
TRINITY_DN28013_c0_g1_i1	tr|N1QVS3|N1QVS3_AEGTA	85	1.5e-40	173.7	99.6	ORFNames=F775_17894 {ECO:0000313|EMBL:EMT13742.1};	N1QVS3_AEGTA	Putative LRR receptor-like serine/threonine-protein kinase	SubName: Full=Putative LRR receptor-like serine/threonine-protein kinase {ECO:0000313|EMBL:EMT13742.1, ECO:0000313|EnsemblPlants:EMT13742};
TRINITY_DN28047_c0_g1_i4	tr|A0A1D5U4J1|A0A1D5U4J1_WHEAT	160	6.3e-85	322.8	59.2		A0A1D5U4J1_WHEAT	Uncharacterized protein	SubName: Full=Uncharacterized protein {ECO:0000313|EnsemblPlants:TRIAE_CS42_2BL_TGACv1_132032_AA0434650.1};
TRINITY_DN28047_c0_g1_i3	tr|N1QW03|N1QW03_AEGTA	213	2e-41	177.9	99.7	ORFNames=F775_11706 {ECO:0000313|EMBL:EMT13981.1};	N1QW03_AEGTA	IAA-amino acid hydrolase ILR1-like protein 5	SubName: Full=IAA-amino acid hydrolase ILR1-like protein 5 {ECO:0000313|EMBL:EMT13981.1, ECO:0000313|EnsemblPlants:EMT13981};
TRINITY_DN28047_c0_g1_i8	tr|A0A1D5U4J1|A0A1D5U4J1_WHEAT	160	4.1e-84	320.1	59.4		A0A1D5U4J1_WHEAT	Uncharacterized protein	SubName: Full=Uncharacterized protein {ECO:0000313|EnsemblPlants:TRIAE_CS42_2BL_TGACv1_132032_AA0434650.1};
TRINITY_DN28047_c0_g1_i6	tr|A0A1D5U4J1|A0A1D5U4J1_WHEAT	180	6.3e-97	362.1	99.8		A0A1D5U4J1_WHEAT	Uncharacterized protein	SubName: Full=Uncharacterized protein {ECO:0000313|EnsemblPlants:TRIAE_CS42_2BL_TGACv1_132032_AA0434650.1};
TRINITY_DN28047_c0_g1_i1	tr|N1QW03|N1QW03_AEGTA	55	4.2e-18	99.4	54.6	ORFNames=F775_11706 {ECO:0000313|EMBL:EMT13981.1};	N1QW03_AEGTA	IAA-amino acid hydrolase ILR1-like protein 5	SubName: Full=IAA-amino acid hydrolase ILR1-like protein 5 {ECO:0000313|EMBL:EMT13981.1, ECO:0000313|EnsemblPlants:EMT13981};
TRINITY_DN28047_c0_g1_i9	tr|A0A1D5U4J1|A0A1D5U4J1_WHEAT	313	2.7e-103	384	99.2		A0A1D5U4J1_WHEAT	Uncharacterized protein	SubName: Full=Uncharacterized protein {ECO:0000313|EnsemblPlants:TRIAE_CS42_2BL_TGACv1_132032_AA0434650.1};
TRINITY_DN28047_c0_g1_i7	tr|A0A1D6RIS2|A0A1D6RIS2_WHEAT	71	3.1e-31	142.5	99.1		A0A1D6RIS2_WHEAT	Uncharacterized protein	SubName: Full=Uncharacterized protein {ECO:0000313|EnsemblPlants:TRIAE_CS42_2AL_TGACv1_093912_AA0289270.2};
TRINITY_DN28047_c0_g1_i5	tr|A0A1D6RIS2|A0A1D6RIS2_WHEAT	62	1.3e-24	121.7	36.8		A0A1D6RIS2_WHEAT	Uncharacterized protein	SubName: Full=Uncharacterized protein {ECO:0000313|EnsemblPlants:TRIAE_CS42_2AL_TGACv1_093912_AA0289270.2};
TRINITY_DN28047_c0_g1_i2	tr|A0A1D5U4J1|A0A1D5U4J1_WHEAT	160	4.1e-84	320.1	59.2		A0A1D5U4J1_WHEAT	Uncharacterized protein	SubName: Full=Uncharacterized protein {ECO:0000313|EnsemblPlants:TRIAE_CS42_2BL_TGACv1_132032_AA0434650.1};
TRINITY_DN28005_c0_g1_i2	tr|A0A1D5YJ60|A0A1D5YJ60_WHEAT	64	5.1e-27	129	61.9		A0A1D5YJ60_WHEAT	Uncharacterized protein	SubName: Full=Uncharacterized protein {ECO:0000313|EnsemblPlants:TRIAE_CS42_5AL_TGACv1_375485_AA1222590.1};
TRINITY_DN28005_c0_g1_i1	tr|A0A1D6S4S2|A0A1D6S4S2_WHEAT	62	1.8e-24	120.6	61.2		A0A1D6S4S2_WHEAT	Uncharacterized protein	SubName: Full=Uncharacterized protein {ECO:0000313|EnsemblPlants:TRIAE_CS42_5DL_TGACv1_432983_AA1396810.1};
TRINITY_DN28005_c0_g2_i1	tr|A0A287DZA7|A0A287DZA7_HORVV	44	0.00076	52	44.7		A0A287DZA7_HORVV	Uncharacterized protein	SubName: Full=Uncharacterized protein {ECO:0000313|EnsemblPlants:HORVU0Hr1G010810.1};
TRINITY_DN28063_c0_g1_i2	tr|N1R1F7|N1R1F7_AEGTA	102	5.6e-48	199.9	41.6	ORFNames=F775_42700 {ECO:0000313|EMBL:EMT16254.1};	N1R1F7_AEGTA	Uncharacterized protein	SubName: Full=Uncharacterized protein {ECO:0000313|EMBL:EMT16254.1, ECO:0000313|EnsemblPlants:EMT16254};
TRINITY_DN28063_c0_g1_i1	tr|A0A1D5VBB9|A0A1D5VBB9_WHEAT	65	2.8e-25	124.4	28.2		A0A1D5VBB9_WHEAT	Uncharacterized protein	SubName: Full=Uncharacterized protein {ECO:0000313|EnsemblPlants:TRIAE_CS42_3AL_TGACv1_195318_AA0647990.1};
TRINITY_DN28063_c0_g1_i3	tr|A0A1D5VBB9|A0A1D5VBB9_WHEAT	104	1.2e-48	202.2	39.6		A0A1D5VBB9_WHEAT	Uncharacterized protein	SubName: Full=Uncharacterized protein {ECO:0000313|EnsemblPlants:TRIAE_CS42_3AL_TGACv1_195318_AA0647990.1};
TRINITY_DN28001_c0_g1_i2	tr|A0A1D5V3L1|A0A1D5V3L1_WHEAT	278	1.6e-137	498	71.3		A0A1D5V3L1_WHEAT	Uncharacterized protein	SubName: Full=Uncharacterized protein {ECO:0000313|EnsemblPlants:TRIAE_CS42_2DS_TGACv1_180247_AA0610550.1};
TRINITY_DN28001_c0_g1_i5	tr|A0A1D5UBH1|A0A1D5UBH1_WHEAT	148	1.1e-77	298.9	50.1		A0A1D5UBH1_WHEAT	Uncharacterized protein	SubName: Full=Uncharacterized protein {ECO:0000313|EnsemblPlants:TRIAE_CS42_2BS_TGACv1_146870_AA0474350.1};
TRINITY_DN28001_c0_g1_i3	tr|A0A1D5UBH1|A0A1D5UBH1_WHEAT	153	6.7e-76	293.1	45.1		A0A1D5UBH1_WHEAT	Uncharacterized protein	SubName: Full=Uncharacterized protein {ECO:0000313|EnsemblPlants:TRIAE_CS42_2BS_TGACv1_146870_AA0474350.1};
TRINITY_DN28001_c0_g1_i1	tr|A0A1D5V3L1|A0A1D5V3L1_WHEAT	375	7.2e-200	705.7	66.8		A0A1D5V3L1_WHEAT	Uncharacterized protein	SubName: Full=Uncharacterized protein {ECO:0000313|EnsemblPlants:TRIAE_CS42_2DS_TGACv1_180247_AA0610550.1};
TRINITY_DN28003_c0_g1_i2	tr|M7YQ50|M7YQ50_TRIUA	73	5.9e-13	82.4	66	ORFNames=TRIUR3_15912 {ECO:0000313|EMBL:EMS49106.1};	M7YQ50_TRIUA	Uncharacterized protein	SubName: Full=Uncharacterized protein {ECO:0000313|EMBL:EMS49106.1, ECO:0000313|EnsemblPlants:TRIUR3_15912-P1};
TRINITY_DN28003_c0_g1_i1	tr|M7ZAQ3|M7ZAQ3_TRIUA	116	7.5e-11	75.5	92.7	ORFNames=TRIUR3_12165 {ECO:0000313|EMBL:EMS56711.1};	M7ZAQ3_TRIUA	Uncharacterized protein	SubName: Full=Uncharacterized protein {ECO:0000313|EMBL:EMS56711.1, ECO:0000313|EnsemblPlants:TRIUR3_12165-P1};
TRINITY_DN28003_c0_g2_i1	tr|M7ZAQ3|M7ZAQ3_TRIUA	107	9.4e-27	128.3	96.4	ORFNames=TRIUR3_12165 {ECO:0000313|EMBL:EMS56711.1};	M7ZAQ3_TRIUA	Uncharacterized protein	SubName: Full=Uncharacterized protein {ECO:0000313|EMBL:EMS56711.1, ECO:0000313|EnsemblPlants:TRIUR3_12165-P1};
TRINITY_DN28003_c1_g1_i1	tr|A0A1D5ZCR4|A0A1D5ZCR4_WHEAT	68	2.7e-32	146	99		A0A1D5ZCR4_WHEAT	Uncharacterized protein	SubName: Full=Uncharacterized protein {ECO:0000313|EnsemblPlants:TRIAE_CS42_5BL_TGACv1_408036_AA1361310.1};
TRINITY_DN28003_c1_g2_i1	tr|A0A1D6S1Z1|A0A1D6S1Z1_WHEAT	137	1.2e-62	248.4	62.8		A0A1D6S1Z1_WHEAT	Uncharacterized protein	SubName: Full=Uncharacterized protein {ECO:0000313|EnsemblPlants:TRIAE_CS42_5AL_TGACv1_377565_AA1247970.1};
TRINITY_DN28003_c2_g1_i1	tr|A0A1D5YKM1|A0A1D5YKM1_WHEAT	69	8.3e-27	129	41.2		A0A1D5YKM1_WHEAT	Uncharacterized protein	SubName: Full=Uncharacterized protein {ECO:0000313|EnsemblPlants:TRIAE_CS42_5AL_TGACv1_375932_AA1229080.1};
TRINITY_DN28003_c2_g2_i1	tr|A0A1D5ZJ82|A0A1D5ZJ82_WHEAT	99	1.3e-42	181.8	50		A0A1D5ZJ82_WHEAT	Uncharacterized protein	SubName: Full=Uncharacterized protein {ECO:0000313|EnsemblPlants:TRIAE_CS42_5DL_TGACv1_433016_AA1398280.1};
TRINITY_DN28003_c3_g1_i1	tr|A0A1D5T4I6|A0A1D5T4I6_WHEAT	41	1.6e-16	93.6	58		A0A1D5T4I6_WHEAT	Uncharacterized protein	SubName: Full=Uncharacterized protein {ECO:0000313|EnsemblPlants:TRIAE_CS42_1DS_TGACv1_081340_AA0260050.1};
TRINITY_DN28079_c0_g1_i4	tr|W5B493|W5B493_WHEAT	488	4.3e-292	1012.3	73.7		W5B493_WHEAT	Uncharacterized protein	SubName: Full=Uncharacterized protein {ECO:0000313|EnsemblPlants:TRIAE_CS42_2AS_TGACv1_112156_AA0331650.1};
TRINITY_DN28079_c0_g1_i2	tr|W5B493|W5B493_WHEAT	488	3.5e-286	992.6	74.4		W5B493_WHEAT	Uncharacterized protein	SubName: Full=Uncharacterized protein {ECO:0000313|EnsemblPlants:TRIAE_CS42_2AS_TGACv1_112156_AA0331650.1};
TRINITY_DN28079_c0_g1_i3	tr|W5B493|W5B493_WHEAT	488	4.2e-292	1012.3	74.4		W5B493_WHEAT	Uncharacterized protein	SubName: Full=Uncharacterized protein {ECO:0000313|EnsemblPlants:TRIAE_CS42_2AS_TGACv1_112156_AA0331650.1};
TRINITY_DN28079_c0_g1_i1	tr|W5B493|W5B493_WHEAT	488	3.5e-286	992.6	73.7		W5B493_WHEAT	Uncharacterized protein	SubName: Full=Uncharacterized protein {ECO:0000313|EnsemblPlants:TRIAE_CS42_2AS_TGACv1_112156_AA0331650.1};
TRINITY_DN28079_c0_g2_i4	tr|A0A1D5US09|A0A1D5US09_WHEAT	319	3.9e-168	600.5	48.3		A0A1D5US09_WHEAT	Uncharacterized protein	SubName: Full=Uncharacterized protein {ECO:0000313|EnsemblPlants:TRIAE_CS42_2DL_TGACv1_160686_AA0553120.1};
TRINITY_DN28079_c0_g2_i1	tr|A0A1D5US09|A0A1D5US09_WHEAT	329	3.9e-190	674.1	35.3		A0A1D5US09_WHEAT	Uncharacterized protein	SubName: Full=Uncharacterized protein {ECO:0000313|EnsemblPlants:TRIAE_CS42_2DL_TGACv1_160686_AA0553120.1};
TRINITY_DN28079_c0_g2_i2	tr|W5C1I2|W5C1I2_WHEAT	516	7.3e-305	1055	61.5		W5C1I2_WHEAT	Uncharacterized protein	SubName: Full=Uncharacterized protein {ECO:0000313|EnsemblPlants:TRIAE_CS42_2DL_TGACv1_160686_AA0553120.2};
TRINITY_DN28079_c0_g2_i5	tr|A0A1D5US09|A0A1D5US09_WHEAT	453	9e-202	712.6	53.3		A0A1D5US09_WHEAT	Uncharacterized protein	SubName: Full=Uncharacterized protein {ECO:0000313|EnsemblPlants:TRIAE_CS42_2DL_TGACv1_160686_AA0553120.1};
TRINITY_DN28079_c0_g2_i10	tr|A0A1D5US09|A0A1D5US09_WHEAT	511	3.7e-301	1042.7	61.3		A0A1D5US09_WHEAT	Uncharacterized protein	SubName: Full=Uncharacterized protein {ECO:0000313|EnsemblPlants:TRIAE_CS42_2DL_TGACv1_160686_AA0553120.1};
TRINITY_DN28079_c0_g2_i11	tr|W5C1I2|W5C1I2_WHEAT	458	1.3e-205	725.3	53.6		W5C1I2_WHEAT	Uncharacterized protein	SubName: Full=Uncharacterized protein {ECO:0000313|EnsemblPlants:TRIAE_CS42_2DL_TGACv1_160686_AA0553120.2};
TRINITY_DN28079_c0_g2_i6	tr|W5C1I2|W5C1I2_WHEAT	391	1.9e-214	754.6	49.6		W5C1I2_WHEAT	Uncharacterized protein	SubName: Full=Uncharacterized protein {ECO:0000313|EnsemblPlants:TRIAE_CS42_2DL_TGACv1_160686_AA0553120.2};
TRINITY_DN28079_c0_g2_i8	tr|W5C1I2|W5C1I2_WHEAT	334	5.8e-194	686.8	35.6		W5C1I2_WHEAT	Uncharacterized protein	SubName: Full=Uncharacterized protein {ECO:0000313|EnsemblPlants:TRIAE_CS42_2DL_TGACv1_160686_AA0553120.2};
TRINITY_DN28079_c0_g2_i3	tr|A0A1D5US09|A0A1D5US09_WHEAT	386	1.3e-210	741.9	49.3		A0A1D5US09_WHEAT	Uncharacterized protein	SubName: Full=Uncharacterized protein {ECO:0000313|EnsemblPlants:TRIAE_CS42_2DL_TGACv1_160686_AA0553120.1};
TRINITY_DN28079_c0_g2_i7	tr|A0A1D5US09|A0A1D5US09_WHEAT	386	2.8e-159	571.2	53.1		A0A1D5US09_WHEAT	Uncharacterized protein	SubName: Full=Uncharacterized protein {ECO:0000313|EnsemblPlants:TRIAE_CS42_2DL_TGACv1_160686_AA0553120.1};
TRINITY_DN28079_c0_g2_i9	tr|A0A1D5US09|A0A1D5US09_WHEAT	444	1.1e-258	901.4	62.4		A0A1D5US09_WHEAT	Uncharacterized protein	SubName: Full=Uncharacterized protein {ECO:0000313|EnsemblPlants:TRIAE_CS42_2DL_TGACv1_160686_AA0553120.1};
TRINITY_DN28029_c0_g1_i1	tr|A0A1D5SEX9|A0A1D5SEX9_WHEAT	49	2.5e-07	63.5	49.3		A0A1D5SEX9_WHEAT	Uncharacterized protein	SubName: Full=Uncharacterized protein {ECO:0000313|EnsemblPlants:TRIAE_CS42_1BL_TGACv1_032390_AA0129310.1};
TRINITY_DN28044_c1_g1_i2	tr|A0A1D5VNZ2|A0A1D5VNZ2_WHEAT	31	0.00016	54.3	30.4		A0A1D5VNZ2_WHEAT	Uncharacterized protein	SubName: Full=Uncharacterized protein {ECO:0000313|EnsemblPlants:TRIAE_CS42_3B_TGACv1_220676_AA0714940.1};
TRINITY_DN28044_c1_g1_i1	tr|A0A1D5VNZ2|A0A1D5VNZ2_WHEAT	31	0.00016	54.3	30.4		A0A1D5VNZ2_WHEAT	Uncharacterized protein	SubName: Full=Uncharacterized protein {ECO:0000313|EnsemblPlants:TRIAE_CS42_3B_TGACv1_220676_AA0714940.1};
TRINITY_DN28044_c1_g2_i1	tr|A0A1D5VNZ2|A0A1D5VNZ2_WHEAT	31	0.00097	51.6	32.1		A0A1D5VNZ2_WHEAT	Uncharacterized protein	SubName: Full=Uncharacterized protein {ECO:0000313|EnsemblPlants:TRIAE_CS42_3B_TGACv1_220676_AA0714940.1};
TRINITY_DN28044_c3_g1_i1	tr|A0A1D5VNZ2|A0A1D5VNZ2_WHEAT	40	2.5e-05	57	38		A0A1D5VNZ2_WHEAT	Uncharacterized protein	SubName: Full=Uncharacterized protein {ECO:0000313|EnsemblPlants:TRIAE_CS42_3B_TGACv1_220676_AA0714940.1};
TRINITY_DN28044_c4_g1_i1	tr|A0A1D5VNZ2|A0A1D5VNZ2_WHEAT	41	4.2e-08	65.9	50.6		A0A1D5VNZ2_WHEAT	Uncharacterized protein	SubName: Full=Uncharacterized protein {ECO:0000313|EnsemblPlants:TRIAE_CS42_3B_TGACv1_220676_AA0714940.1};
TRINITY_DN28075_c0_g1_i4	tr|A0A1D6D950|A0A1D6D950_WHEAT	642	0	1101.3	99.9		A0A1D6D950_WHEAT	Histone-lysine N-methyltransferase	RecName: Full=Histone-lysine N-methyltransferase {ECO:0000256|SAAS:SAAS00591749}; EC=2.1.1.43 {ECO:0000256|SAAS:SAAS00591749};
TRINITY_DN28075_c0_g1_i3	tr|A0A1D6D950|A0A1D6D950_WHEAT	642	0	1115.1	99.9		A0A1D6D950_WHEAT	Histone-lysine N-methyltransferase	RecName: Full=Histone-lysine N-methyltransferase {ECO:0000256|SAAS:SAAS00591749}; EC=2.1.1.43 {ECO:0000256|SAAS:SAAS00591749};
TRINITY_DN28075_c0_g1_i2	tr|A0A1D6D950|A0A1D6D950_WHEAT	643	5e-298	1031.9	99.9		A0A1D6D950_WHEAT	Histone-lysine N-methyltransferase	RecName: Full=Histone-lysine N-methyltransferase {ECO:0000256|SAAS:SAAS00591749}; EC=2.1.1.43 {ECO:0000256|SAAS:SAAS00591749};
TRINITY_DN28075_c0_g1_i1	tr|M7Z1J8|M7Z1J8_TRIUA	472	3e-255	889.4	99.2	ORFNames=TRIUR3_21779 {ECO:0000313|EMBL:EMS46225.1};	M7Z1J8_TRIUA	Histone-lysine N-methyltransferase ATX2	SubName: Full=Histone-lysine N-methyltransferase ATX2 {ECO:0000313|EMBL:EMS46225.1, ECO:0000313|EnsemblPlants:TRIUR3_21779-P1};
TRINITY_DN28075_c0_g1_i5	tr|M7Z1J8|M7Z1J8_TRIUA	472	3.2e-249	869.4	99.2	ORFNames=TRIUR3_21779 {ECO:0000313|EMBL:EMS46225.1};	M7Z1J8_TRIUA	Histone-lysine N-methyltransferase ATX2	SubName: Full=Histone-lysine N-methyltransferase ATX2 {ECO:0000313|EMBL:EMS46225.1, ECO:0000313|EnsemblPlants:TRIUR3_21779-P1};
TRINITY_DN28064_c0_g1_i1	tr|A0A1D5VKX9|A0A1D5VKX9_WHEAT	61	2.9e-24	119.4	82.4		A0A1D5VKX9_WHEAT	Uncharacterized protein	SubName: Full=Uncharacterized protein {ECO:0000313|EnsemblPlants:TRIAE_CS42_3AS_TGACv1_212158_AA0698250.1};
TRINITY_DN28083_c0_g1_i1	tr|A0A1D5UZX4|A0A1D5UZX4_WHEAT	121	3.8e-59	236.5	70.5		A0A1D5UZX4_WHEAT	Uncharacterized protein	SubName: Full=Uncharacterized protein {ECO:0000313|EnsemblPlants:TRIAE_CS42_2DS_TGACv1_178210_AA0592780.1};
TRINITY_DN28083_c0_g1_i2	tr|A0A1D5UW06|A0A1D5UW06_WHEAT	121	9e-61	241.9	70.5		A0A1D5UW06_WHEAT	Uncharacterized protein	SubName: Full=Uncharacterized protein {ECO:0000313|EnsemblPlants:TRIAE_CS42_2DS_TGACv1_177336_AA0574030.1};
TRINITY_DN28083_c0_g2_i1	tr|A0A096ULZ5|A0A096ULZ5_WHEAT	268	4e-148	532.7	99.8		A0A096ULZ5_WHEAT	Uncharacterized protein	SubName: Full=Uncharacterized protein {ECO:0000313|EnsemblPlants:TRIAE_CS42_2AS_TGACv1_112336_AA0335810.1};
TRINITY_DN28094_c0_g1_i1	tr|A0A1D5VVQ2|A0A1D5VVQ2_WHEAT	44	6.4e-08	65.1	60.8		A0A1D5VVQ2_WHEAT	Uncharacterized protein	SubName: Full=Uncharacterized protein {ECO:0000313|EnsemblPlants:TRIAE_CS42_3B_TGACv1_221732_AA0748730.1};
TRINITY_DN28094_c0_g1_i2	tr|A0A1D5VVQ2|A0A1D5VVQ2_WHEAT	44	1.9e-07	63.5	60.8		A0A1D5VVQ2_WHEAT	Uncharacterized protein	SubName: Full=Uncharacterized protein {ECO:0000313|EnsemblPlants:TRIAE_CS42_3B_TGACv1_221732_AA0748730.1};
TRINITY_DN28035_c0_g1_i4	tr|W5C6Z8|W5C6Z8_WHEAT	76	1.8e-33	150.6	66.7		W5C6Z8_WHEAT	Uncharacterized protein	SubName: Full=Uncharacterized protein {ECO:0000313|EnsemblPlants:TRIAE_CS42_2DS_TGACv1_179624_AA0608280.1};
TRINITY_DN28035_c0_g1_i1	tr|W5C6Z8|W5C6Z8_WHEAT	76	2e-32	147.1	67.7		W5C6Z8_WHEAT	Uncharacterized protein	SubName: Full=Uncharacterized protein {ECO:0000313|EnsemblPlants:TRIAE_CS42_2DS_TGACv1_179624_AA0608280.1};
TRINITY_DN28035_c0_g1_i5	tr|W5C6Z8|W5C6Z8_WHEAT	76	2.6e-32	146.7	66.7		W5C6Z8_WHEAT	Uncharacterized protein	SubName: Full=Uncharacterized protein {ECO:0000313|EnsemblPlants:TRIAE_CS42_2DS_TGACv1_179624_AA0608280.1};
TRINITY_DN28035_c0_g1_i6	tr|M7YYP7|M7YYP7_TRIUA	97	2.7e-44	186.8	72.9	ORFNames=TRIUR3_10116 {ECO:0000313|EMBL:EMS52316.1};	M7YYP7_TRIUA	Uncharacterized protein	SubName: Full=Uncharacterized protein {ECO:0000313|EMBL:EMS52316.1, ECO:0000313|EnsemblPlants:TRIUR3_10116-P1};
TRINITY_DN28035_c0_g1_i2	tr|W5C6Z8|W5C6Z8_WHEAT	97	6e-44	185.7	72		W5C6Z8_WHEAT	Uncharacterized protein	SubName: Full=Uncharacterized protein {ECO:0000313|EnsemblPlants:TRIAE_CS42_2DS_TGACv1_179624_AA0608280.1};
TRINITY_DN28082_c0_g1_i9	tr|A0A1D6DC09|A0A1D6DC09_WHEAT	688	1.7e-279	971.1	66.3		A0A1D6DC09_WHEAT	Uncharacterized protein	SubName: Full=Uncharacterized protein {ECO:0000313|EnsemblPlants:TRIAE_CS42_U_TGACv1_641553_AA2097840.1};
TRINITY_DN28082_c0_g1_i4	tr|A0A1D6DC09|A0A1D6DC09_WHEAT	690	1.9e-283	984.6	52.1		A0A1D6DC09_WHEAT	Uncharacterized protein	SubName: Full=Uncharacterized protein {ECO:0000313|EnsemblPlants:TRIAE_CS42_U_TGACv1_641553_AA2097840.1};
TRINITY_DN28082_c0_g1_i5	tr|A0A1D6DC09|A0A1D6DC09_WHEAT	284	1.1e-153	551.6	81.1		A0A1D6DC09_WHEAT	Uncharacterized protein	SubName: Full=Uncharacterized protein {ECO:0000313|EnsemblPlants:TRIAE_CS42_U_TGACv1_641553_AA2097840.1};
TRINITY_DN28082_c0_g1_i2	tr|T1MTM5|T1MTM5_TRIUA	434	6.3e-243	848.6	85.1		T1MTM5_TRIUA	Uncharacterized protein	SubName: Full=Uncharacterized protein {ECO:0000313|EnsemblPlants:TRIUR3_21299-P1};
TRINITY_DN28082_c0_g1_i8	tr|A0A1D6DC09|A0A1D6DC09_WHEAT	690	2e-281	977.6	60.3		A0A1D6DC09_WHEAT	Uncharacterized protein	SubName: Full=Uncharacterized protein {ECO:0000313|EnsemblPlants:TRIAE_CS42_U_TGACv1_641553_AA2097840.1};
TRINITY_DN28082_c0_g1_i7	tr|A0A1D6DC09|A0A1D6DC09_WHEAT	690	5.9e-284	986.1	57.9		A0A1D6DC09_WHEAT	Uncharacterized protein	SubName: Full=Uncharacterized protein {ECO:0000313|EnsemblPlants:TRIAE_CS42_U_TGACv1_641553_AA2097840.1};
TRINITY_DN28082_c0_g1_i6	tr|A0A1D6DC09|A0A1D6DC09_WHEAT	690	6.7e-284	986.1	51		A0A1D6DC09_WHEAT	Uncharacterized protein	SubName: Full=Uncharacterized protein {ECO:0000313|EnsemblPlants:TRIAE_CS42_U_TGACv1_641553_AA2097840.1};
TRINITY_DN28082_c0_g1_i1	tr|T1MTM5|T1MTM5_TRIUA	728	2.5e-295	1023.8	61.6		T1MTM5_TRIUA	Uncharacterized protein	SubName: Full=Uncharacterized protein {ECO:0000313|EnsemblPlants:TRIUR3_21299-P1};
TRINITY_DN28082_c0_g1_i3	tr|A0A1D6DC09|A0A1D6DC09_WHEAT	406	3.4e-227	796.2	86		A0A1D6DC09_WHEAT	Uncharacterized protein	SubName: Full=Uncharacterized protein {ECO:0000313|EnsemblPlants:TRIAE_CS42_U_TGACv1_641553_AA2097840.1};
TRINITY_DN28082_c0_g3_i1	sp|O22854|ETFQO_ARATH	24	0.00022	54.3	17.2	Name=ETFQO; OrderedLocusNames=At2g43400; ORFNames=T1O24;	ETFQO_ARATH	Electron transfer flavoprotein-ubiquinone oxidoreductase, mitochondrial; ETF-QO; ETF-ubiquinone oxidoreductase	RecName: Full=Electron transfer flavoprotein-ubiquinone oxidoreductase, mitochondrial; Short=ETF-QO; Short=ETF-ubiquinone oxidoreductase; EC=1.5.5.1; Flags: Precursor;
TRINITY_DN28082_c0_g3_i2	tr|M7ZU58|M7ZU58_TRIUA	46	2.4e-05	57.8	26.7	ORFNames=TRIUR3_02482 {ECO:0000313|EMBL:EMS51629.1};	M7ZU58_TRIUA	PHD finger protein 3	SubName: Full=PHD finger protein 3 {ECO:0000313|EMBL:EMS51629.1, ECO:0000313|EnsemblPlants:TRIUR3_02482-P1};
TRINITY_DN28049_c0_g1_i2	tr|N1QTI4|N1QTI4_AEGTA	53	1.1e-22	115.5	27	ORFNames=F775_21857 {ECO:0000313|EMBL:EMT03703.1};	N1QTI4_AEGTA	Putative disease resistance protein RGA3	SubName: Full=Putative disease resistance protein RGA3 {ECO:0000313|EMBL:EMT03703.1, ECO:0000313|EnsemblPlants:EMT03703};
TRINITY_DN28049_c0_g1_i3	tr|N1QTI4|N1QTI4_AEGTA	53	3e-21	110.9	24.4	ORFNames=F775_21857 {ECO:0000313|EMBL:EMT03703.1};	N1QTI4_AEGTA	Putative disease resistance protein RGA3	SubName: Full=Putative disease resistance protein RGA3 {ECO:0000313|EMBL:EMT03703.1, ECO:0000313|EnsemblPlants:EMT03703};
TRINITY_DN28049_c0_g1_i1	tr|N1QTI4|N1QTI4_AEGTA	53	5.1e-21	110.2	25.1	ORFNames=F775_21857 {ECO:0000313|EMBL:EMT03703.1};	N1QTI4_AEGTA	Putative disease resistance protein RGA3	SubName: Full=Putative disease resistance protein RGA3 {ECO:0000313|EMBL:EMT03703.1, ECO:0000313|EnsemblPlants:EMT03703};
TRINITY_DN28027_c0_g1_i1	tr|M8C8L0|M8C8L0_AEGTA	61	5e-24	119.8	36.7	ORFNames=F775_31027 {ECO:0000313|EMBL:EMT11453.1};	M8C8L0_AEGTA	Putative aminotransferase y4uB	SubName: Full=Putative aminotransferase y4uB {ECO:0000313|EMBL:EMT11453.1, ECO:0000313|EnsemblPlants:EMT11453};
TRINITY_DN28027_c1_g1_i1	tr|D2KZ08|D2KZ08_WHEAT	40	4.7e-12	79.3	38.5	Name=TaSAG1 {ECO:0000313|EMBL:BAI66419.1};	D2KZ08_WHEAT	Aminotransferase	SubName: Full=Aminotransferase {ECO:0000313|EMBL:BAI66419.1, ECO:0000313|EnsemblPlants:TRIAE_CS42_2BL_TGACv1_130280_AA0407970.3};
TRINITY_DN28071_c0_g1_i3	tr|A0A1D6RIM0|A0A1D6RIM0_WHEAT	468	1.7e-270	940.3	87.6		A0A1D6RIM0_WHEAT	Carboxypeptidase	RecName: Full=Carboxypeptidase {ECO:0000256|RuleBase:RU361156}; EC=3.4.16.- {ECO:0000256|RuleBase:RU361156};
TRINITY_DN28071_c0_g1_i2	tr|A0A1D6RIM0|A0A1D6RIM0_WHEAT	468	1.1e-271	944.1	87.5		A0A1D6RIM0_WHEAT	Carboxypeptidase	RecName: Full=Carboxypeptidase {ECO:0000256|RuleBase:RU361156}; EC=3.4.16.- {ECO:0000256|RuleBase:RU361156};
TRINITY_DN28071_c0_g1_i4	tr|A0A1D6RIM0|A0A1D6RIM0_WHEAT	468	1.2e-271	944.1	84.7		A0A1D6RIM0_WHEAT	Carboxypeptidase	RecName: Full=Carboxypeptidase {ECO:0000256|RuleBase:RU361156}; EC=3.4.16.- {ECO:0000256|RuleBase:RU361156};
TRINITY_DN28071_c0_g1_i7	tr|A0A1D6RIM0|A0A1D6RIM0_WHEAT	468	5.9e-268	931.8	87		A0A1D6RIM0_WHEAT	Carboxypeptidase	RecName: Full=Carboxypeptidase {ECO:0000256|RuleBase:RU361156}; EC=3.4.16.- {ECO:0000256|RuleBase:RU361156};
TRINITY_DN28071_c0_g1_i6	tr|A0A1D6RIM0|A0A1D6RIM0_WHEAT	467	1.7e-263	916.8	96.9		A0A1D6RIM0_WHEAT	Carboxypeptidase	RecName: Full=Carboxypeptidase {ECO:0000256|RuleBase:RU361156}; EC=3.4.16.- {ECO:0000256|RuleBase:RU361156};
TRINITY_DN28071_c0_g1_i1	tr|A0A1D6RIM0|A0A1D6RIM0_WHEAT	468	1.6e-270	940.3	90.6		A0A1D6RIM0_WHEAT	Carboxypeptidase	RecName: Full=Carboxypeptidase {ECO:0000256|RuleBase:RU361156}; EC=3.4.16.- {ECO:0000256|RuleBase:RU361156};
TRINITY_DN28071_c0_g1_i8	tr|A0A1D6RIM0|A0A1D6RIM0_WHEAT	467	9e-271	941	94		A0A1D6RIM0_WHEAT	Carboxypeptidase	RecName: Full=Carboxypeptidase {ECO:0000256|RuleBase:RU361156}; EC=3.4.16.- {ECO:0000256|RuleBase:RU361156};
TRINITY_DN28071_c0_g2_i1	tr|M8C682|M8C682_AEGTA	47	5.8e-18	98.6	58.8	ORFNames=F775_09876 {ECO:0000313|EMBL:EMT29573.1};	M8C682_AEGTA	Carboxypeptidase	RecName: Full=Carboxypeptidase {ECO:0000256|RuleBase:RU361156}; EC=3.4.16.- {ECO:0000256|RuleBase:RU361156};
TRINITY_DN28054_c0_g1_i1	tr|A0A1D5XKM9|A0A1D5XKM9_WHEAT	43	3e-15	89.4	63.2		A0A1D5XKM9_WHEAT	Uncharacterized protein	SubName: Full=Uncharacterized protein {ECO:0000313|EnsemblPlants:TRIAE_CS42_4BL_TGACv1_321368_AA1059670.1};
TRINITY_DN28054_c0_g1_i2	tr|A0A1D5XKM9|A0A1D5XKM9_WHEAT	43	1.5e-14	87.8	35.4		A0A1D5XKM9_WHEAT	Uncharacterized protein	SubName: Full=Uncharacterized protein {ECO:0000313|EnsemblPlants:TRIAE_CS42_4BL_TGACv1_321368_AA1059670.1};
TRINITY_DN28036_c0_g1_i7	tr|A0A1D6A2Y4|A0A1D6A2Y4_WHEAT	107	4.8e-52	212.2	100		A0A1D6A2Y4_WHEAT	Uncharacterized protein	SubName: Full=Uncharacterized protein {ECO:0000313|EnsemblPlants:TRIAE_CS42_5DS_TGACv1_457397_AA1485950.3};
TRINITY_DN28036_c0_g1_i4	tr|A0A1D6BNA6|A0A1D6BNA6_WHEAT	173	4.1e-103	383.3	61.3		A0A1D6BNA6_WHEAT	Uncharacterized protein	SubName: Full=Uncharacterized protein {ECO:0000313|EnsemblPlants:TRIAE_CS42_7AL_TGACv1_557551_AA1782890.1};
TRINITY_DN28036_c0_g1_i5	tr|A0A1D6BNA6|A0A1D6BNA6_WHEAT	177	1.2e-105	391.7	58.3		A0A1D6BNA6_WHEAT	Uncharacterized protein	SubName: Full=Uncharacterized protein {ECO:0000313|EnsemblPlants:TRIAE_CS42_7AL_TGACv1_557551_AA1782890.1};
TRINITY_DN28036_c0_g1_i3	tr|A0A1D6A2Y4|A0A1D6A2Y4_WHEAT	120	1.9e-57	230.3	99.2		A0A1D6A2Y4_WHEAT	Uncharacterized protein	SubName: Full=Uncharacterized protein {ECO:0000313|EnsemblPlants:TRIAE_CS42_5DS_TGACv1_457397_AA1485950.3};
TRINITY_DN28036_c0_g1_i8	tr|A0A1D6BNA6|A0A1D6BNA6_WHEAT	173	9e-103	383.3	28.1		A0A1D6BNA6_WHEAT	Uncharacterized protein	SubName: Full=Uncharacterized protein {ECO:0000313|EnsemblPlants:TRIAE_CS42_7AL_TGACv1_557551_AA1782890.1};
TRINITY_DN28036_c0_g1_i1	tr|W5EX19|W5EX19_WHEAT	140	1.1e-71	279.6	30.2		W5EX19_WHEAT	Uncharacterized protein	SubName: Full=Uncharacterized protein {ECO:0000313|EnsemblPlants:TRIAE_CS42_5AL_TGACv1_375443_AA1221750.1};
TRINITY_DN28036_c0_g1_i6	tr|A0A1D6BNA6|A0A1D6BNA6_WHEAT	177	2.6e-105	391.7	27.7		A0A1D6BNA6_WHEAT	Uncharacterized protein	SubName: Full=Uncharacterized protein {ECO:0000313|EnsemblPlants:TRIAE_CS42_7AL_TGACv1_557551_AA1782890.1};
TRINITY_DN28036_c0_g1_i2	tr|W5EX19|W5EX19_WHEAT	110	3.2e-54	221.1	32.6		W5EX19_WHEAT	Uncharacterized protein	SubName: Full=Uncharacterized protein {ECO:0000313|EnsemblPlants:TRIAE_CS42_5AL_TGACv1_375443_AA1221750.1};
TRINITY_DN28036_c0_g2_i1	tr|A0A1D6A2Y4|A0A1D6A2Y4_WHEAT	67	5.1e-28	131.7	99.5		A0A1D6A2Y4_WHEAT	Uncharacterized protein	SubName: Full=Uncharacterized protein {ECO:0000313|EnsemblPlants:TRIAE_CS42_5DS_TGACv1_457397_AA1485950.3};
TRINITY_DN28036_c0_g3_i1	tr|A0A1D6A2Y4|A0A1D6A2Y4_WHEAT	68	2.2e-26	126.3	98.1		A0A1D6A2Y4_WHEAT	Uncharacterized protein	SubName: Full=Uncharacterized protein {ECO:0000313|EnsemblPlants:TRIAE_CS42_5DS_TGACv1_457397_AA1485950.3};
TRINITY_DN28020_c0_g1_i1	tr|W5F711|W5F711_WHEAT	356	1.9e-192	680.6	81.8		W5F711_WHEAT	Uncharacterized protein	SubName: Full=Uncharacterized protein {ECO:0000313|EnsemblPlants:TRIAE_CS42_5BL_TGACv1_406838_AA1350360.1};
TRINITY_DN28020_c0_g1_i2	tr|W5F711|W5F711_WHEAT	179	4.4e-89	336.3	84.2		W5F711_WHEAT	Uncharacterized protein	SubName: Full=Uncharacterized protein {ECO:0000313|EnsemblPlants:TRIAE_CS42_5BL_TGACv1_406838_AA1350360.1};
TRINITY_DN28020_c0_g1_i3	tr|A0A1D5YCS3|A0A1D5YCS3_WHEAT	356	8.7e-193	681.8	81.8		A0A1D5YCS3_WHEAT	Uncharacterized protein	SubName: Full=Uncharacterized protein {ECO:0000313|EnsemblPlants:TRIAE_CS42_5AL_TGACv1_374237_AA1194650.1};
TRINITY_DN28020_c0_g2_i1	tr|I1GQL2|I1GQL2_BRADI	178	1.1e-50	209.5	45.9	Name=LOC100826597 {ECO:0000313|EnsemblPlants:BRADI1G15547.1}; ORFNames=BRADI_1g15547 {ECO:0000313|EMBL:KQK14340.1};	I1GQL2_BRADI	Uncharacterized protein	SubName: Full=Uncharacterized protein {ECO:0000313|EMBL:KQK14340.1, ECO:0000313|EnsemblPlants:BRADI1G15547.1};
TRINITY_DN28021_c0_g1_i1	tr|A0A1D6DLV0|A0A1D6DLV0_WHEAT	384	1.7e-160	575.9	35.2		A0A1D6DLV0_WHEAT	Uncharacterized protein	SubName: Full=Uncharacterized protein {ECO:0000313|EnsemblPlants:TRIAE_CS42_U_TGACv1_658643_AA2151850.1};
TRINITY_DN28021_c0_g2_i1	tr|A0A1D6DLV0|A0A1D6DLV0_WHEAT	176	4.1e-93	349.4	99.8		A0A1D6DLV0_WHEAT	Uncharacterized protein	SubName: Full=Uncharacterized protein {ECO:0000313|EnsemblPlants:TRIAE_CS42_U_TGACv1_658643_AA2151850.1};
TRINITY_DN28004_c0_g1_i2	tr|A0A177DNY9|A0A177DNY9_ALTAL	232	3.3e-73	284.3	61.5	ORFNames=CC77DRAFT_1019984 {ECO:0000313|EMBL:OAG21196.1};	A0A177DNY9_ALTAL	30 kDa heat shock protein	SubName: Full=30 kDa heat shock protein {ECO:0000313|EMBL:OAG21196.1};
TRINITY_DN28004_c0_g1_i1	tr|A0A177DNY9|A0A177DNY9_ALTAL	232	2.5e-73	284.6	61.3	ORFNames=CC77DRAFT_1019984 {ECO:0000313|EMBL:OAG21196.1};	A0A177DNY9_ALTAL	30 kDa heat shock protein	SubName: Full=30 kDa heat shock protein {ECO:0000313|EMBL:OAG21196.1};
TRINITY_DN28050_c0_g1_i4	tr|A0A1D5TKI9|A0A1D5TKI9_WHEAT	40	1.8e-11	77	50.8		A0A1D5TKI9_WHEAT	Uncharacterized protein	SubName: Full=Uncharacterized protein {ECO:0000313|EnsemblPlants:TRIAE_CS42_2AS_TGACv1_112546_AA0340480.2};
TRINITY_DN28050_c0_g1_i1	tr|M7Z511|M7Z511_TRIUA	23	0.00064	53.9	7.3	ORFNames=TRIUR3_07794 {ECO:0000313|EMBL:EMS55047.1};	M7Z511_TRIUA	Uncharacterized protein	SubName: Full=Uncharacterized protein {ECO:0000313|EMBL:EMS55047.1, ECO:0000313|EnsemblPlants:TRIUR3_07794-P1};
TRINITY_DN28050_c0_g1_i6	tr|M7Z511|M7Z511_TRIUA	23	0.00039	53.9	12	ORFNames=TRIUR3_07794 {ECO:0000313|EMBL:EMS55047.1};	M7Z511_TRIUA	Uncharacterized protein	SubName: Full=Uncharacterized protein {ECO:0000313|EMBL:EMS55047.1, ECO:0000313|EnsemblPlants:TRIUR3_07794-P1};
TRINITY_DN28050_c0_g1_i3	tr|M7Z511|M7Z511_TRIUA	23	0.00064	53.9	7.3	ORFNames=TRIUR3_07794 {ECO:0000313|EMBL:EMS55047.1};	M7Z511_TRIUA	Uncharacterized protein	SubName: Full=Uncharacterized protein {ECO:0000313|EMBL:EMS55047.1, ECO:0000313|EnsemblPlants:TRIUR3_07794-P1};
TRINITY_DN28050_c0_g1_i5	tr|A0A1D5TKI9|A0A1D5TKI9_WHEAT	74	4.7e-30	138.7	98.7		A0A1D5TKI9_WHEAT	Uncharacterized protein	SubName: Full=Uncharacterized protein {ECO:0000313|EnsemblPlants:TRIAE_CS42_2AS_TGACv1_112546_AA0340480.2};
TRINITY_DN28050_c0_g3_i2	tr|A0A1D6RH28|A0A1D6RH28_WHEAT	75	6.3e-18	99	65.6		A0A1D6RH28_WHEAT	Autophagy-related protein	RecName: Full=Autophagy-related protein {ECO:0000256|RuleBase:RU004384};
TRINITY_DN28050_c0_g3_i1	tr|A0A1D6RH28|A0A1D6RH28_WHEAT	75	3.9e-19	102.4	87.3		A0A1D6RH28_WHEAT	Autophagy-related protein	RecName: Full=Autophagy-related protein {ECO:0000256|RuleBase:RU004384};
TRINITY_DN28050_c0_g4_i1	tr|M8AE78|M8AE78_TRIUA	32	0.00085	51.6	37.8	ORFNames=TRIUR3_12734 {ECO:0000313|EMBL:EMS58919.1};	M8AE78_TRIUA	Uncharacterized protein	SubName: Full=Uncharacterized protein {ECO:0000313|EMBL:EMS58919.1, ECO:0000313|EnsemblPlants:TRIUR3_12734-P1};
TRINITY_DN28050_c0_g5_i1	tr|N1QUF4|N1QUF4_AEGTA	325	1.5e-152	548.1	73.4	ORFNames=F775_03660 {ECO:0000313|EMBL:EMT02967.1};	N1QUF4_AEGTA	Uncharacterized protein	SubName: Full=Uncharacterized protein {ECO:0000313|EMBL:EMT02967.1, ECO:0000313|EnsemblPlants:EMT02967};
TRINITY_DN28050_c0_g5_i2	tr|N1QUF4|N1QUF4_AEGTA	259	2.2e-125	458	54.1	ORFNames=F775_03660 {ECO:0000313|EMBL:EMT02967.1};	N1QUF4_AEGTA	Uncharacterized protein	SubName: Full=Uncharacterized protein {ECO:0000313|EMBL:EMT02967.1, ECO:0000313|EnsemblPlants:EMT02967};
TRINITY_DN28070_c0_g1_i9	tr|A0A287Q1E9|A0A287Q1E9_HORVV	38	9.4e-06	59.7	15		A0A287Q1E9_HORVV	Uncharacterized protein	SubName: Full=Uncharacterized protein {ECO:0000313|EnsemblPlants:HORVU4Hr1G088270.11};
TRINITY_DN28070_c0_g1_i7	tr|A0A287Q1E9|A0A287Q1E9_HORVV	38	1.4e-05	59.7	9.7		A0A287Q1E9_HORVV	Uncharacterized protein	SubName: Full=Uncharacterized protein {ECO:0000313|EnsemblPlants:HORVU4Hr1G088270.11};
TRINITY_DN28070_c0_g1_i1	tr|A0A287Q1E9|A0A287Q1E9_HORVV	29	3.7e-05	58.9	5		A0A287Q1E9_HORVV	Uncharacterized protein	SubName: Full=Uncharacterized protein {ECO:0000313|EnsemblPlants:HORVU4Hr1G088270.11};
TRINITY_DN28070_c0_g1_i11	tr|I1HVT0|I1HVT0_BRADI	34	0.00022	55.1	14.4	Name=LOC100842635 {ECO:0000313|EnsemblPlants:BRADI2G62470.2}; ORFNames=BRADI_2g62470 {ECO:0000313|EMBL:KQK11795.1};	I1HVT0_BRADI	Uncharacterized protein	SubName: Full=Uncharacterized protein {ECO:0000313|EMBL:KQK11795.1, ECO:0000313|EnsemblPlants:BRADI2G62470.2};
TRINITY_DN28070_c0_g1_i6	tr|A0A287Q1E9|A0A287Q1E9_HORVV	38	2.2e-06	60.5	36.9		A0A287Q1E9_HORVV	Uncharacterized protein	SubName: Full=Uncharacterized protein {ECO:0000313|EnsemblPlants:HORVU4Hr1G088270.11};
TRINITY_DN28070_c0_g1_i3	tr|A0A287Q1E9|A0A287Q1E9_HORVV	29	2.9e-05	58.9	6.3		A0A287Q1E9_HORVV	Uncharacterized protein	SubName: Full=Uncharacterized protein {ECO:0000313|EnsemblPlants:HORVU4Hr1G088270.11};
TRINITY_DN28098_c1_g1_i1	tr|A0A1D5YHM7|A0A1D5YHM7_WHEAT	66	1.2e-05	57.4	98.5		A0A1D5YHM7_WHEAT	Uncharacterized protein	SubName: Full=Uncharacterized protein {ECO:0000313|EnsemblPlants:TRIAE_CS42_5AL_TGACv1_375120_AA1216400.1};
TRINITY_DN28055_c0_g1_i4	tr|W5G2G4|W5G2G4_WHEAT	160	2.5e-79	304.7	42		W5G2G4_WHEAT	Uncharacterized protein	SubName: Full=Uncharacterized protein {ECO:0000313|EnsemblPlants:TRIAE_CS42_5DS_TGACv1_456967_AA1480300.1};
TRINITY_DN28055_c0_g1_i2	tr|F2EC28|F2EC28_HORVV	160	9e-80	305.8	52.6		F2EC28_HORVV	Predicted protein	SubName: Full=Predicted protein {ECO:0000313|EMBL:BAK04900.1}; Flags: Fragment;
TRINITY_DN28055_c0_g1_i3	tr|A0A1D5ZER5|A0A1D5ZER5_WHEAT	160	1.2e-80	308.9	48.6		A0A1D5ZER5_WHEAT	Uncharacterized protein	SubName: Full=Uncharacterized protein {ECO:0000313|EnsemblPlants:TRIAE_CS42_5BS_TGACv1_423279_AA1373070.2};
TRINITY_DN28055_c0_g1_i1	tr|W5G2G4|W5G2G4_WHEAT	160	2.5e-79	304.7	42		W5G2G4_WHEAT	Uncharacterized protein	SubName: Full=Uncharacterized protein {ECO:0000313|EnsemblPlants:TRIAE_CS42_5DS_TGACv1_456967_AA1480300.1};
TRINITY_DN28069_c0_g1_i7	tr|M7ZLD7|M7ZLD7_TRIUA	49	2.9e-18	101.3	18.8	ORFNames=TRIUR3_16143 {ECO:0000313|EMBL:EMS60937.1};	M7ZLD7_TRIUA	Uncharacterized protein	SubName: Full=Uncharacterized protein {ECO:0000313|EMBL:EMS60937.1, ECO:0000313|EnsemblPlants:TRIUR3_16143-P1};
TRINITY_DN28069_c0_g1_i8	tr|F2DEV4|F2DEV4_HORVV	54	3.4e-06	61.6	15.5		F2DEV4_HORVV	Predicted protein	SubName: Full=Predicted protein {ECO:0000313|EMBL:BAJ93625.1};
TRINITY_DN28069_c0_g1_i2	tr|M7ZLD7|M7ZLD7_TRIUA	49	2.4e-18	101.3	22.4	ORFNames=TRIUR3_16143 {ECO:0000313|EMBL:EMS60937.1};	M7ZLD7_TRIUA	Uncharacterized protein	SubName: Full=Uncharacterized protein {ECO:0000313|EMBL:EMS60937.1, ECO:0000313|EnsemblPlants:TRIUR3_16143-P1};
TRINITY_DN28069_c0_g1_i1	tr|M7ZLD7|M7ZLD7_TRIUA	49	2.2e-18	101.3	25.3	ORFNames=TRIUR3_16143 {ECO:0000313|EMBL:EMS60937.1};	M7ZLD7_TRIUA	Uncharacterized protein	SubName: Full=Uncharacterized protein {ECO:0000313|EMBL:EMS60937.1, ECO:0000313|EnsemblPlants:TRIUR3_16143-P1};
TRINITY_DN28086_c0_g1_i3	sp|P05698|RBL_HORVU	450	7.2e-271	941.8	66.5	Name=rbcL {ECO:0000255|HAMAP-Rule:MF_01338};	RBL_HORVU	Ribulose bisphosphate carboxylase large chain; RuBisCO large subunit	RecName: Full=Ribulose bisphosphate carboxylase large chain {ECO:0000255|HAMAP-Rule:MF_01338}; Short=RuBisCO large subunit {ECO:0000255|HAMAP-Rule:MF_01338}; EC=4.1.1.39 {ECO:0000255|HAMAP-Rule:MF_01338}; Flags: Precursor;
TRINITY_DN28086_c0_g1_i1	tr|A0A287XBD1|A0A287XBD1_HORVV	483	1.4e-290	1007.7	53.7		A0A287XBD1_HORVV	Uncharacterized protein	SubName: Full=Uncharacterized protein {ECO:0000313|EnsemblPlants:HORVU7Hr1G091620.1};
TRINITY_DN28086_c0_g1_i2	sp|P05698|RBL_HORVU	450	7.3e-271	941.8	66.2	Name=rbcL {ECO:0000255|HAMAP-Rule:MF_01338};	RBL_HORVU	Ribulose bisphosphate carboxylase large chain; RuBisCO large subunit	RecName: Full=Ribulose bisphosphate carboxylase large chain {ECO:0000255|HAMAP-Rule:MF_01338}; Short=RuBisCO large subunit {ECO:0000255|HAMAP-Rule:MF_01338}; EC=4.1.1.39 {ECO:0000255|HAMAP-Rule:MF_01338}; Flags: Precursor;
TRINITY_DN28084_c0_g1_i3	tr|I1J2X9|I1J2X9_BRADI	90	0.00024	53.9	76.3	Name=LOC100822289 {ECO:0000313|EnsemblPlants:BRADI5G24917.1}; ORFNames=BRADI_5g24917 {ECO:0000313|EMBL:KQJ85112.1};	I1J2X9_BRADI	Uncharacterized protein	SubName: Full=Uncharacterized protein {ECO:0000313|EMBL:KQJ85112.1, ECO:0000313|EnsemblPlants:BRADI5G24917.1};
TRINITY_DN91541_c0_g1_i1	tr|A0A1D5UAK8|A0A1D5UAK8_WHEAT	278	3e-121	443.7	83.7		A0A1D5UAK8_WHEAT	Uncharacterized protein	SubName: Full=Uncharacterized protein {ECO:0000313|EnsemblPlants:TRIAE_CS42_2BS_TGACv1_146638_AA0469880.1};
TRINITY_DN91545_c0_g1_i2	tr|R7WFX2|R7WFX2_AEGTA	81	1.5e-27	132.1	31.5	ORFNames=F775_27148 {ECO:0000313|EMBL:EMT20390.1};	R7WFX2_AEGTA	Transcription initiation factor IIF subunit alpha	SubName: Full=Transcription initiation factor IIF subunit alpha {ECO:0000313|EMBL:EMT20390.1, ECO:0000313|EnsemblPlants:EMT20390};
TRINITY_DN91545_c0_g1_i1	tr|R7WFX2|R7WFX2_AEGTA	81	1.5e-27	132.1	31.5	ORFNames=F775_27148 {ECO:0000313|EMBL:EMT20390.1};	R7WFX2_AEGTA	Transcription initiation factor IIF subunit alpha	SubName: Full=Transcription initiation factor IIF subunit alpha {ECO:0000313|EMBL:EMT20390.1, ECO:0000313|EnsemblPlants:EMT20390};
TRINITY_DN91593_c0_g1_i1	tr|A0A1D5U5N6|A0A1D5U5N6_WHEAT	62	2.5e-20	106.3	84.9		A0A1D5U5N6_WHEAT	Uncharacterized protein	SubName: Full=Uncharacterized protein {ECO:0000313|EnsemblPlants:TRIAE_CS42_2BL_TGACv1_132912_AA0440390.1};
TRINITY_DN91593_c0_g2_i1	tr|A0A1D5U5N6|A0A1D5U5N6_WHEAT	75	1.8e-19	103.6	92.9		A0A1D5U5N6_WHEAT	Uncharacterized protein	SubName: Full=Uncharacterized protein {ECO:0000313|EnsemblPlants:TRIAE_CS42_2BL_TGACv1_132912_AA0440390.1};
TRINITY_DN91585_c0_g1_i1	tr|A0A0W8CTH5|A0A0W8CTH5_PHYNI	376	3.8e-75	290.8	95.7	ORFNames=AM587_10011245 {ECO:0000313|EMBL:KUF87180.1}, AM588_10007123 {ECO:0000313|EMBL:KUF97892.1};	A0A0W8CTH5_PHYNI	Potassium voltage-gated channel subfamily H member 7; Serine/threonine-protein kinase Sgk3	SubName: Full=Potassium voltage-gated channel subfamily H member 7 {ECO:0000313|EMBL:KUF97892.1}; SubName: Full=Serine/threonine-protein kinase Sgk3 {ECO:0000313|EMBL:KUF87180.1};
TRINITY_DN91588_c0_g1_i1	tr|A0A0S2K153|A0A0S2K153_9GAMM	157	5.2e-50	206.1	96.1	ORFNames=PP2015_1732 {ECO:0000313|EMBL:ALO42234.1};	A0A0S2K153_9GAMM	2-oxoisovalerate dehydrogenase subunit beta	SubName: Full=2-oxoisovalerate dehydrogenase subunit beta {ECO:0000313|EMBL:ALO42234.1};
TRINITY_DN91587_c0_g1_i1	tr|C3ZHN5|C3ZHN5_BRAFL	317	1.4e-11	79.7	75.4	ORFNames=BRAFLDRAFT_280654 {ECO:0000313|EMBL:EEN48030.1};	C3ZHN5_BRAFL	Uncharacterized protein	SubName: Full=Uncharacterized protein {ECO:0000313|EMBL:EEN48030.1}; Flags: Fragment;
TRINITY_DN91537_c0_g1_i1	tr|M8AWS3|M8AWS3_AEGTA	57	4.8e-11	76.3	45.1	ORFNames=F775_12979 {ECO:0000313|EMBL:EMT05874.1};	M8AWS3_AEGTA	Uncharacterized protein	SubName: Full=Uncharacterized protein {ECO:0000313|EMBL:EMT05874.1, ECO:0000313|EnsemblPlants:EMT05874};
TRINITY_DN91537_c0_g1_i2	tr|M8AWS3|M8AWS3_AEGTA	61	2.4e-20	106.3	86.7	ORFNames=F775_12979 {ECO:0000313|EMBL:EMT05874.1};	M8AWS3_AEGTA	Uncharacterized protein	SubName: Full=Uncharacterized protein {ECO:0000313|EMBL:EMT05874.1, ECO:0000313|EnsemblPlants:EMT05874};
TRINITY_DN91537_c0_g1_i3	tr|M8AWS3|M8AWS3_AEGTA	56	1.9e-12	80.9	44.6	ORFNames=F775_12979 {ECO:0000313|EMBL:EMT05874.1};	M8AWS3_AEGTA	Uncharacterized protein	SubName: Full=Uncharacterized protein {ECO:0000313|EMBL:EMT05874.1, ECO:0000313|EnsemblPlants:EMT05874};
TRINITY_DN91571_c0_g1_i1	tr|A0A1D6BI34|A0A1D6BI34_WHEAT	87	6.7e-13	82	90.6		A0A1D6BI34_WHEAT	Uncharacterized protein	SubName: Full=Uncharacterized protein {ECO:0000313|EnsemblPlants:TRIAE_CS42_7AL_TGACv1_556120_AA1756310.1};
TRINITY_DN91571_c0_g2_i1	tr|A0A1D6BI34|A0A1D6BI34_WHEAT	100	1e-23	118.2	85.7		A0A1D6BI34_WHEAT	Uncharacterized protein	SubName: Full=Uncharacterized protein {ECO:0000313|EnsemblPlants:TRIAE_CS42_7AL_TGACv1_556120_AA1756310.1};
TRINITY_DN91539_c0_g1_i1	tr|I1J0Q3|I1J0Q3_BRADI	66	1.3e-06	63.5	13.4		I1J0Q3_BRADI	Uncharacterized protein	SubName: Full=Uncharacterized protein {ECO:0000313|EnsemblPlants:BRADI5G18690.1};
TRINITY_DN91532_c0_g1_i1	tr|M8CDU1|M8CDU1_AEGTA	47	2.6e-14	87.4	29.9	ORFNames=F775_25150 {ECO:0000313|EMBL:EMT25277.1};	M8CDU1_AEGTA	Histone-lysine N-methyltransferase, H3 lysine-9 specific SUVH6	SubName: Full=Histone-lysine N-methyltransferase, H3 lysine-9 specific SUVH6 {ECO:0000313|EMBL:EMT25277.1, ECO:0000313|EnsemblPlants:EMT25277};
TRINITY_DN91559_c0_g1_i1	tr|T0SCG2|T0SCG2_9STRA	483	1.6e-155	558.1	99.7	ORFNames=SDRG_02370 {ECO:0000313|EMBL:EQC40477.1};	T0SCG2_9STRA	Lon protease homolog, mitochondrial	RecName: Full=Lon protease homolog, mitochondrial {ECO:0000256|HAMAP-Rule:MF_03120}; EC=3.4.21.53 {ECO:0000256|HAMAP-Rule:MF_03120};
TRINITY_DN91514_c0_g1_i2	tr|Q41522|Q41522_WHEAT	374	9.3e-214	751.5	82.6		Q41522_WHEAT	Thiol protease	SubName: Full=Thiol protease {ECO:0000313|EMBL:AAC49287.1};
TRINITY_DN91514_c0_g1_i1	tr|Q41522|Q41522_WHEAT	167	2e-83	317.4	81.7		Q41522_WHEAT	Thiol protease	SubName: Full=Thiol protease {ECO:0000313|EMBL:AAC49287.1};
TRINITY_DN91551_c0_g1_i2	tr|A0A1D5VN13|A0A1D5VN13_WHEAT	61	2.9e-22	113.2	59.6		A0A1D5VN13_WHEAT	Uncharacterized protein	SubName: Full=Uncharacterized protein {ECO:0000313|EnsemblPlants:TRIAE_CS42_3B_TGACv1_220598_AA0710510.1};
TRINITY_DN91533_c0_g1_i3	tr|A0A1D5WX87|A0A1D5WX87_WHEAT	182	2.9e-88	333.6	83		A0A1D5WX87_WHEAT	Uncharacterized protein	SubName: Full=Uncharacterized protein {ECO:0000313|EnsemblPlants:TRIAE_CS42_3DS_TGACv1_274412_AA0935710.1};
TRINITY_DN91533_c0_g1_i2	tr|A0A1D5VY00|A0A1D5VY00_WHEAT	176	1.2e-89	338.2	80.5		A0A1D5VY00_WHEAT	Uncharacterized protein	SubName: Full=Uncharacterized protein {ECO:0000313|EnsemblPlants:TRIAE_CS42_3B_TGACv1_222244_AA0760460.1};
TRINITY_DN91512_c0_g1_i2	tr|A0A1D6APK8|A0A1D6APK8_WHEAT	113	3.7e-40	173.7	54.1		A0A1D6APK8_WHEAT	Uncharacterized protein	SubName: Full=Uncharacterized protein {ECO:0000313|EnsemblPlants:TRIAE_CS42_6BL_TGACv1_500423_AA1604360.1};
TRINITY_DN91512_c0_g1_i1	tr|A0A1D6APK8|A0A1D6APK8_WHEAT	113	3.1e-40	173.7	63.6		A0A1D6APK8_WHEAT	Uncharacterized protein	SubName: Full=Uncharacterized protein {ECO:0000313|EnsemblPlants:TRIAE_CS42_6BL_TGACv1_500423_AA1604360.1};
TRINITY_DN91536_c0_g1_i4	tr|A0A287T3E4|A0A287T3E4_HORVV	69	1.6e-06	62.4	24.4		A0A287T3E4_HORVV	Uncharacterized protein	SubName: Full=Uncharacterized protein {ECO:0000313|EnsemblPlants:HORVU5Hr1G125620.13};
TRINITY_DN91536_c1_g1_i1	tr|A0A1D6C8R4|A0A1D6C8R4_WHEAT	56	5.8e-26	126.3	31.1		A0A1D6C8R4_WHEAT	Uncharacterized protein	SubName: Full=Uncharacterized protein {ECO:0000313|EnsemblPlants:TRIAE_CS42_7BL_TGACv1_578401_AA1894220.3};
TRINITY_DN91507_c0_g1_i1	tr|M7YMG2|M7YMG2_TRIUA	68	1.9e-30	139.8	98.6	ORFNames=TRIUR3_11467 {ECO:0000313|EMBL:EMS51728.1};	M7YMG2_TRIUA	Enhancer of polycomb-like protein	RecName: Full=Enhancer of polycomb-like protein {ECO:0000256|RuleBase:RU361124};
TRINITY_DN91573_c0_g1_i1	tr|N1R1R2|N1R1R2_AEGTA	33	3.9e-08	67.4	15.2	ORFNames=F775_52319 {ECO:0000313|EMBL:EMT20675.1};	N1R1R2_AEGTA	Annexin	RecName: Full=Annexin {ECO:0000256|RuleBase:RU003540};
TRINITY_DN91599_c0_g1_i1	tr|A0A287J6X0|A0A287J6X0_HORVV	68	2.3e-14	86.7	82.3		A0A287J6X0_HORVV	Glucose-6-phosphate 1-epimerase	RecName: Full=Glucose-6-phosphate 1-epimerase {ECO:0000256|PIRNR:PIRNR016020}; EC=5.1.3.15 {ECO:0000256|PIRNR:PIRNR016020};
TRINITY_DN91599_c0_g1_i2	tr|A0A287J6X0|A0A287J6X0_HORVV	84	1.2e-21	113.6	14.8		A0A287J6X0_HORVV	Glucose-6-phosphate 1-epimerase	RecName: Full=Glucose-6-phosphate 1-epimerase {ECO:0000256|PIRNR:PIRNR016020}; EC=5.1.3.15 {ECO:0000256|PIRNR:PIRNR016020};
TRINITY_DN91599_c0_g1_i3	tr|A0A287J6X0|A0A287J6X0_HORVV	84	1.2e-21	113.6	15		A0A287J6X0_HORVV	Glucose-6-phosphate 1-epimerase	RecName: Full=Glucose-6-phosphate 1-epimerase {ECO:0000256|PIRNR:PIRNR016020}; EC=5.1.3.15 {ECO:0000256|PIRNR:PIRNR016020};
TRINITY_DN91564_c0_g1_i1	tr|L8GX53|L8GX53_ACACA	109	1.9e-48	201.1	60	ORFNames=ACA1_063390 {ECO:0000313|EMBL:ELR17575.1};	L8GX53_ACACA	60S ribosomal protein, putative	SubName: Full=60S ribosomal protein, putative {ECO:0000313|EMBL:ELR17575.1};
TRINITY_DN91500_c0_g1_i1	tr|A0A287JJ08|A0A287JJ08_HORVV	145	3.1e-16	94	73.6		A0A287JJ08_HORVV	Uncharacterized protein	SubName: Full=Uncharacterized protein {ECO:0000313|EnsemblPlants:HORVU2Hr1G114720.17};
TRINITY_DN91500_c0_g1_i2	tr|A0A287JJ08|A0A287JJ08_HORVV	146	3.3e-16	94	68.9		A0A287JJ08_HORVV	Uncharacterized protein	SubName: Full=Uncharacterized protein {ECO:0000313|EnsemblPlants:HORVU2Hr1G114720.17};
TRINITY_DN91586_c0_g1_i1	tr|A0A1D5YVA0|A0A1D5YVA0_WHEAT	79	2.3e-25	124	55.5		A0A1D5YVA0_WHEAT	Uncharacterized protein	SubName: Full=Uncharacterized protein {ECO:0000313|EnsemblPlants:TRIAE_CS42_5AS_TGACv1_394026_AA1277780.1};
TRINITY_DN91544_c0_g1_i1	tr|M8BXD7|M8BXD7_AEGTA	60	1.9e-23	118.2	27.2	ORFNames=F775_05473 {ECO:0000313|EMBL:EMT07608.1};	M8BXD7_AEGTA	Uncharacterized protein	SubName: Full=Uncharacterized protein {ECO:0000313|EMBL:EMT07608.1, ECO:0000313|EnsemblPlants:EMT07608};
TRINITY_DN91544_c0_g1_i2	tr|A0A1D5SR40|A0A1D5SR40_WHEAT	433	3.4e-263	916.4	61.9		A0A1D5SR40_WHEAT	Uncharacterized protein	SubName: Full=Uncharacterized protein {ECO:0000313|EnsemblPlants:TRIAE_CS42_1DL_TGACv1_061268_AA0190590.1};
TRINITY_DN91562_c0_g1_i1	tr|A0A1D5XYC3|A0A1D5XYC3_WHEAT	300	1.7e-109	404.8	77.5		A0A1D5XYC3_WHEAT	Uncharacterized protein	SubName: Full=Uncharacterized protein {ECO:0000313|EnsemblPlants:TRIAE_CS42_4DL_TGACv1_342952_AA1125950.1};
TRINITY_DN91594_c1_g1_i1	tr|A0A1D5WRP4|A0A1D5WRP4_WHEAT	131	6.7e-64	251.9	99		A0A1D5WRP4_WHEAT	Uncharacterized protein	SubName: Full=Uncharacterized protein {ECO:0000313|EnsemblPlants:TRIAE_CS42_3DS_TGACv1_271827_AA0908960.1};
TRINITY_DN91596_c0_g1_i1	tr|D0LXB5|D0LXB5_HALO1	111	6.7e-42	178.7	90	OrderedLocusNames=Hoch_3655 {ECO:0000313|EMBL:ACY16157.1};	D0LXB5_HALO1	Uncharacterized protein	SubName: Full=Uncharacterized protein {ECO:0000313|EMBL:ACY16157.1};
TRINITY_DN91576_c0_g1_i1	tr|Q7XCD6|Q7XCD6_ORYSJ	81	1e-20	109	42.3	OrderedLocusNames=LOC_Os10g40400 {ECO:0000313|EMBL:AAP54937.2};	Q7XCD6_ORYSJ	Retrotransposon protein, putative, unclassified	SubName: Full=Retrotransposon protein, putative, unclassified {ECO:0000313|EMBL:AAP54937.2};
TRINITY_DN91578_c0_g1_i2	tr|A0A287MGD3|A0A287MGD3_HORVV	83	5.2e-20	107.5	24.6		A0A287MGD3_HORVV	Uncharacterized protein	SubName: Full=Uncharacterized protein {ECO:0000313|EnsemblPlants:HORVU3Hr1G098230.15};
TRINITY_DN91578_c0_g1_i1	tr|M7YWA2|M7YWA2_TRIUA	59	2.5e-24	122.1	14.4	ORFNames=TRIUR3_26822 {ECO:0000313|EMBL:EMS51887.1};	M7YWA2_TRIUA	Uncharacterized protein	SubName: Full=Uncharacterized protein {ECO:0000313|EMBL:EMS51887.1, ECO:0000313|EnsemblPlants:TRIUR3_26822-P1};
TRINITY_DN91519_c0_g1_i1	tr|A0A1D5XHD4|A0A1D5XHD4_WHEAT	66	3.4e-32	145.6	98		A0A1D5XHD4_WHEAT	Pectinesterase	RecName: Full=Pectinesterase {ECO:0000256|RuleBase:RU000589}; EC=3.1.1.11 {ECO:0000256|RuleBase:RU000589};
TRINITY_DN91550_c0_g2_i3	tr|T1MRB1|T1MRB1_TRIUA	53	3.2e-21	112.5	8.1		T1MRB1_TRIUA	Uncharacterized protein	SubName: Full=Uncharacterized protein {ECO:0000313|EnsemblPlants:TRIUR3_20444-P1};
TRINITY_DN91550_c0_g2_i1	tr|T1MRB1|T1MRB1_TRIUA	53	3.2e-21	112.5	8.1		T1MRB1_TRIUA	Uncharacterized protein	SubName: Full=Uncharacterized protein {ECO:0000313|EnsemblPlants:TRIUR3_20444-P1};
TRINITY_DN91531_c0_g1_i1	tr|M8BBC5|M8BBC5_AEGTA	181	5.6e-97	363.2	50.8	ORFNames=F775_18087 {ECO:0000313|EMBL:EMT10960.1};	M8BBC5_AEGTA	Putative LRR receptor-like serine/threonine-protein kinase	SubName: Full=Putative LRR receptor-like serine/threonine-protein kinase {ECO:0000313|EMBL:EMT10960.1, ECO:0000313|EnsemblPlants:EMT10960};
TRINITY_DN91580_c0_g1_i9	tr|Q9M4N8|Q9M4N8_SECCE	73	3.4e-21	109.8	67.2	Name=em-R1 {ECO:0000313|EMBL:CAB88091.1};	Q9M4N8_SECCE	Early-methionine-labelled polypeptide	SubName: Full=Early-methionine-labelled polypeptide {ECO:0000313|EMBL:CAB88091.1};
TRINITY_DN91580_c0_g1_i3	tr|Q9M4N8|Q9M4N8_SECCE	73	3.1e-21	110.5	43.1	Name=em-R1 {ECO:0000313|EMBL:CAB88091.1};	Q9M4N8_SECCE	Early-methionine-labelled polypeptide	SubName: Full=Early-methionine-labelled polypeptide {ECO:0000313|EMBL:CAB88091.1};
TRINITY_DN91580_c0_g1_i6	tr|Q9M4N8|Q9M4N8_SECCE	73	3.3e-21	110.5	40.3	Name=em-R1 {ECO:0000313|EMBL:CAB88091.1};	Q9M4N8_SECCE	Early-methionine-labelled polypeptide	SubName: Full=Early-methionine-labelled polypeptide {ECO:0000313|EMBL:CAB88091.1};
TRINITY_DN91580_c0_g1_i5	tr|Q9ZR70|Q9ZR70_WHEAT	93	1e-40	175.6	42.6	Name=Em-D1 {ECO:0000313|EMBL:CAA65311.1};	Q9ZR70_WHEAT	Em protein	SubName: Full=Em protein {ECO:0000313|EMBL:CAA65311.1, ECO:0000313|EnsemblPlants:TRIAE_CS42_1AL_TGACv1_002164_AA0039330.1};
TRINITY_DN91572_c0_g1_i1	tr|E2S3A3|E2S3A3_9CORY	58	9.1e-10	71.2	77.7	ORFNames=HMPREF0305_11005 {ECO:0000313|EMBL:EFQ80864.1}, HMPREF0305_11076 {ECO:0000313|EMBL:EFQ80765.1};	E2S3A3_9CORY	Uncharacterized protein	SubName: Full=Uncharacterized protein {ECO:0000313|EMBL:EFQ80864.1};
TRINITY_DN91572_c0_g1_i2	tr|E2S3A3|E2S3A3_9CORY	58	6.7e-10	71.6	81.3	ORFNames=HMPREF0305_11005 {ECO:0000313|EMBL:EFQ80864.1}, HMPREF0305_11076 {ECO:0000313|EMBL:EFQ80765.1};	E2S3A3_9CORY	Uncharacterized protein	SubName: Full=Uncharacterized protein {ECO:0000313|EMBL:EFQ80864.1};
TRINITY_DN91527_c0_g1_i1	tr|M7YY29|M7YY29_TRIUA	69	1.6e-10	75.9	21.5	ORFNames=TRIUR3_33060 {ECO:0000313|EMBL:EMS52527.1};	M7YY29_TRIUA	Uncharacterized protein	SubName: Full=Uncharacterized protein {ECO:0000313|EMBL:EMS52527.1, ECO:0000313|EnsemblPlants:TRIUR3_33060-P1};
TRINITY_DN91527_c0_g1_i3	tr|M8BB13|M8BB13_AEGTA	129	8.2e-07	63.5	38.4	ORFNames=F775_10192 {ECO:0000313|EMBL:EMT11186.1};	M8BB13_AEGTA	Putative disease resistance RPP13-like protein 3	SubName: Full=Putative disease resistance RPP13-like protein 3 {ECO:0000313|EMBL:EMT11186.1, ECO:0000313|EnsemblPlants:EMT11186};
TRINITY_DN91527_c0_g1_i2	tr|A0A287KSL4|A0A287KSL4_HORVV	80	9.7e-16	93.2	25		A0A287KSL4_HORVV	Uncharacterized protein	SubName: Full=Uncharacterized protein {ECO:0000313|EnsemblPlants:HORVU3Hr1G037330.2};
TRINITY_DN91527_c0_g3_i1	tr|M7YY29|M7YY29_TRIUA	46	4.4e-08	67	24.4	ORFNames=TRIUR3_33060 {ECO:0000313|EMBL:EMS52527.1};	M7YY29_TRIUA	Uncharacterized protein	SubName: Full=Uncharacterized protein {ECO:0000313|EMBL:EMS52527.1, ECO:0000313|EnsemblPlants:TRIUR3_33060-P1};
TRINITY_DN91527_c0_g4_i1	tr|M7YY29|M7YY29_TRIUA	65	6e-16	92.4	55.2	ORFNames=TRIUR3_33060 {ECO:0000313|EMBL:EMS52527.1};	M7YY29_TRIUA	Uncharacterized protein	SubName: Full=Uncharacterized protein {ECO:0000313|EMBL:EMS52527.1, ECO:0000313|EnsemblPlants:TRIUR3_33060-P1};
TRINITY_DN91527_c0_g5_i1	tr|M8BGH8|M8BGH8_AEGTA	35	0.00015	53.9	46.5	ORFNames=F775_52117 {ECO:0000313|EMBL:EMT20823.1};	M8BGH8_AEGTA	Uncharacterized protein	SubName: Full=Uncharacterized protein {ECO:0000313|EMBL:EMT20823.1, ECO:0000313|EnsemblPlants:EMT20823};
TRINITY_DN91527_c0_g6_i1	tr|M7ZE93|M7ZE93_TRIUA	297	1.2e-17	99.8	79.4	ORFNames=TRIUR3_26923 {ECO:0000313|EMBL:EMS57956.1};	M7ZE93_TRIUA	Protein DETOXIFICATION; Multidrug and toxic compound extrusion protein	RecName: Full=Protein DETOXIFICATION {ECO:0000256|RuleBase:RU004914}; AltName: Full=Multidrug and toxic compound extrusion protein {ECO:0000256|RuleBase:RU004914};
TRINITY_DN91524_c0_g1_i1	tr|Q3YPH2|Q3YPH2_GLOPA	175	1e-86	328.2	93.9	Name=cpl-1 {ECO:0000313|EMBL:AAY46196.1};	Q3YPH2_GLOPA	Cathepsin L-like cysteine proteinase	SubName: Full=Cathepsin L-like cysteine proteinase {ECO:0000313|EMBL:AAY46196.1};
TRINITY_DN91524_c0_g1_i3	tr|Q3YPH2|Q3YPH2_GLOPA	175	1.2e-86	328.2	82.5	Name=cpl-1 {ECO:0000313|EMBL:AAY46196.1};	Q3YPH2_GLOPA	Cathepsin L-like cysteine proteinase	SubName: Full=Cathepsin L-like cysteine proteinase {ECO:0000313|EMBL:AAY46196.1};
TRINITY_DN91524_c0_g2_i1	tr|A0A152A4R0|A0A152A4R0_9MYCE	85	4.2e-30	139	97	ORFNames=DLAC_02173 {ECO:0000313|EMBL:KYR01077.1};	A0A152A4R0_9MYCE	Cysteine protease	SubName: Full=Cysteine protease {ECO:0000313|EMBL:KYR01077.1};
TRINITY_DN91548_c0_g1_i1	tr|A0A1D6CWS8|A0A1D6CWS8_WHEAT	61	5.3e-10	73.9	22		A0A1D6CWS8_WHEAT	Uncharacterized protein	SubName: Full=Uncharacterized protein {ECO:0000313|EnsemblPlants:TRIAE_CS42_7DS_TGACv1_621547_AA2018990.1};
TRINITY_DN91548_c0_g1_i2	tr|A0A1D6CWS8|A0A1D6CWS8_WHEAT	61	5.3e-10	73.9	22		A0A1D6CWS8_WHEAT	Uncharacterized protein	SubName: Full=Uncharacterized protein {ECO:0000313|EnsemblPlants:TRIAE_CS42_7DS_TGACv1_621547_AA2018990.1};
TRINITY_DN91581_c0_g1_i2	tr|A0A287F158|A0A287F158_HORVV	270	7.1e-89	336.3	77.5		A0A287F158_HORVV	Uncharacterized protein	SubName: Full=Uncharacterized protein {ECO:0000313|EnsemblPlants:HORVU1Hr1G029510.1};
TRINITY_DN91581_c0_g2_i2	tr|A0A287KJP1|A0A287KJP1_HORVV	230	5.1e-114	419.5	82.8		A0A287KJP1_HORVV	Uncharacterized protein	SubName: Full=Uncharacterized protein {ECO:0000313|EnsemblPlants:HORVU3Hr1G028370.1};
TRINITY_DN91581_c0_g2_i1	tr|A0A287KJP1|A0A287KJP1_HORVV	230	5.9e-114	419.5	71.9		A0A287KJP1_HORVV	Uncharacterized protein	SubName: Full=Uncharacterized protein {ECO:0000313|EnsemblPlants:HORVU3Hr1G028370.1};
TRINITY_DN91560_c0_g1_i5	tr|Q7X6S0|Q7X6S0_ORYSJ	708	1.8e-259	905.2	42.1	Name=OSJNBb0011N17.2 {ECO:0000313|EMBL:CAD41085.2};	Q7X6S0_ORYSJ	OSJNBb0011N17.2 protein	SubName: Full=OSJNBb0011N17.2 protein {ECO:0000313|EMBL:CAD41085.2};
TRINITY_DN91560_c1_g1_i1	tr|T1MA88|T1MA88_TRIUA	177	2.7e-60	240.4	100		T1MA88_TRIUA	Uncharacterized protein	SubName: Full=Uncharacterized protein {ECO:0000313|EnsemblPlants:TRIUR3_14500-P1};
TRINITY_DN91575_c0_g1_i1	tr|A0A1D5X2I9|A0A1D5X2I9_WHEAT	84	1.4e-32	147.9	61.8		A0A1D5X2I9_WHEAT	Uncharacterized protein	SubName: Full=Uncharacterized protein {ECO:0000313|EnsemblPlants:TRIAE_CS42_4AL_TGACv1_289101_AA0964810.1};
TRINITY_DN91515_c0_g1_i5	tr|A0A1D5UQ45|A0A1D5UQ45_WHEAT	295	2.1e-156	560.5	94.3		A0A1D5UQ45_WHEAT	Uncharacterized protein	SubName: Full=Uncharacterized protein {ECO:0000313|EnsemblPlants:TRIAE_CS42_2DL_TGACv1_159977_AA0545090.1};
TRINITY_DN91515_c0_g1_i3	tr|F2E8N1|F2E8N1_HORVV	376	7.7e-197	695.3	85.5		F2E8N1_HORVV	Predicted protein	SubName: Full=Predicted protein {ECO:0000313|EMBL:BAK03703.1};
TRINITY_DN91515_c0_g1_i4	tr|F2E8N1|F2E8N1_HORVV	230	6.6e-122	446.4	49		F2E8N1_HORVV	Predicted protein	SubName: Full=Predicted protein {ECO:0000313|EMBL:BAK03703.1};
TRINITY_DN91515_c0_g1_i7	tr|A0A1D5UQ45|A0A1D5UQ45_WHEAT	295	1.9e-157	563.9	94.3		A0A1D5UQ45_WHEAT	Uncharacterized protein	SubName: Full=Uncharacterized protein {ECO:0000313|EnsemblPlants:TRIAE_CS42_2DL_TGACv1_159977_AA0545090.1};
TRINITY_DN91515_c0_g1_i9	tr|F2E8N1|F2E8N1_HORVV	230	9.7e-123	449.1	51.3		F2E8N1_HORVV	Predicted protein	SubName: Full=Predicted protein {ECO:0000313|EMBL:BAK03703.1};
TRINITY_DN91515_c0_g1_i6	tr|A0A287JJM8|A0A287JJM8_HORVV	24	0.0005	52.4	28.5		A0A287JJM8_HORVV	Uncharacterized protein	SubName: Full=Uncharacterized protein {ECO:0000313|EnsemblPlants:HORVU2Hr1G116050.1};
TRINITY_DN91515_c0_g1_i10	tr|F2E8N1|F2E8N1_HORVV	376	6.8e-196	692.2	81.6		F2E8N1_HORVV	Predicted protein	SubName: Full=Predicted protein {ECO:0000313|EMBL:BAK03703.1};
TRINITY_DN91595_c0_g1_i1	tr|A7SHY5|A7SHY5_NEMVE	229	1.6e-76	294.7	95.2	ORFNames=v1g245394 {ECO:0000313|EMBL:EDO36655.1};	A7SHY5_NEMVE	Predicted protein	SubName: Full=Predicted protein {ECO:0000313|EMBL:EDO36655.1};
TRINITY_DN91566_c0_g1_i1	tr|A0A1D6BKL8|A0A1D6BKL8_WHEAT	63	5.4e-27	129.4	44.5		A0A1D6BKL8_WHEAT	Uncharacterized protein	SubName: Full=Uncharacterized protein {ECO:0000313|EnsemblPlants:TRIAE_CS42_7AL_TGACv1_556746_AA1770180.1};
TRINITY_DN91566_c0_g2_i2	tr|A0A1D6BKL8|A0A1D6BKL8_WHEAT	109	3.4e-29	137.9	34.3		A0A1D6BKL8_WHEAT	Uncharacterized protein	SubName: Full=Uncharacterized protein {ECO:0000313|EnsemblPlants:TRIAE_CS42_7AL_TGACv1_556746_AA1770180.1};
TRINITY_DN91566_c0_g2_i1	tr|A0A1D6C9N8|A0A1D6C9N8_WHEAT	211	3.4e-50	207.6	68.2		A0A1D6C9N8_WHEAT	Uncharacterized protein	SubName: Full=Uncharacterized protein {ECO:0000313|EnsemblPlants:TRIAE_CS42_7BL_TGACv1_578722_AA1899180.1};
TRINITY_DN91522_c0_g1_i2	tr|A0A0G4ILL0|A0A0G4ILL0_PLABS	100	1.9e-34	153.7	96.8	ORFNames=PBRA_004707 {ECO:0000313|EMBL:CEO96017.1};	A0A0G4ILL0_PLABS	Uncharacterized protein	SubName: Full=Uncharacterized protein {ECO:0000313|EMBL:CEO96017.1};
TRINITY_DN91522_c0_g1_i1	tr|A0A0G4ILL0|A0A0G4ILL0_PLABS	99	9.6e-34	151.4	97.1	ORFNames=PBRA_004707 {ECO:0000313|EMBL:CEO96017.1};	A0A0G4ILL0_PLABS	Uncharacterized protein	SubName: Full=Uncharacterized protein {ECO:0000313|EMBL:CEO96017.1};
TRINITY_DN91511_c0_g1_i1	tr|A0A0A9C688|A0A0A9C688_ARUDO	40	7.6e-10	72	38		A0A0A9C688_ARUDO	Uncharacterized protein	SubName: Full=Uncharacterized protein {ECO:0000313|EMBL:JAD71814.1};
TRINITY_DN91535_c0_g1_i4	tr|M8AVV8|M8AVV8_AEGTA	32	1.7e-08	70.1	5.3	ORFNames=F775_31860 {ECO:0000313|EMBL:EMT05564.1};	M8AVV8_AEGTA	Uncharacterized protein	SubName: Full=Uncharacterized protein {ECO:0000313|EMBL:EMT05564.1, ECO:0000313|EnsemblPlants:EMT05564};
TRINITY_DN91535_c0_g1_i3	tr|M7YDW5|M7YDW5_TRIUA	22	3.8e-05	55.8	30.7	ORFNames=TRIUR3_17885 {ECO:0000313|EMBL:EMS45302.1};	M7YDW5_TRIUA	Peptide methionine sulfoxide reductase B5	SubName: Full=Peptide methionine sulfoxide reductase B5 {ECO:0000313|EMBL:EMS45302.1, ECO:0000313|EnsemblPlants:TRIUR3_17885-P1};
TRINITY_DN91535_c0_g1_i1	tr|M8AVV8|M8AVV8_AEGTA	32	1.3e-08	70.1	6.6	ORFNames=F775_31860 {ECO:0000313|EMBL:EMT05564.1};	M8AVV8_AEGTA	Uncharacterized protein	SubName: Full=Uncharacterized protein {ECO:0000313|EMBL:EMT05564.1, ECO:0000313|EnsemblPlants:EMT05564};
TRINITY_DN91535_c0_g2_i2	tr|A0A096U2Y1|A0A096U2Y1_MAIZE	30	4.6e-07	62.8	28.8	Name=MSRB5.1 {ECO:0000313|EMBL:AJW67890.1};	A0A096U2Y1_MAIZE	Methionine sulfoxide reductase	SubName: Full=Methionine sulfoxide reductase {ECO:0000313|EMBL:AJW67890.1};
TRINITY_DN91535_c0_g2_i1	tr|A0A096U2Y1|A0A096U2Y1_MAIZE	30	1.5e-06	62.8	8.7	Name=MSRB5.1 {ECO:0000313|EMBL:AJW67890.1};	A0A096U2Y1_MAIZE	Methionine sulfoxide reductase	SubName: Full=Methionine sulfoxide reductase {ECO:0000313|EMBL:AJW67890.1};
TRINITY_DN91535_c0_g2_i3	tr|A0A096U2Y1|A0A096U2Y1_MAIZE	30	1.3e-06	62.8	10.1	Name=MSRB5.1 {ECO:0000313|EMBL:AJW67890.1};	A0A096U2Y1_MAIZE	Methionine sulfoxide reductase	SubName: Full=Methionine sulfoxide reductase {ECO:0000313|EMBL:AJW67890.1};
TRINITY_DN91554_c0_g1_i2	tr|M8A4E7|M8A4E7_TRIUA	49	6.3e-13	82.4	41.4	ORFNames=TRIUR3_10108 {ECO:0000313|EMBL:EMS55319.1};	M8A4E7_TRIUA	Uncharacterized protein	SubName: Full=Uncharacterized protein {ECO:0000313|EMBL:EMS55319.1, ECO:0000313|EnsemblPlants:TRIUR3_10108-P1};
TRINITY_DN91554_c0_g1_i1	tr|M8A4E7|M8A4E7_TRIUA	49	6.6e-13	82.4	39.3	ORFNames=TRIUR3_10108 {ECO:0000313|EMBL:EMS55319.1};	M8A4E7_TRIUA	Uncharacterized protein	SubName: Full=Uncharacterized protein {ECO:0000313|EMBL:EMS55319.1, ECO:0000313|EnsemblPlants:TRIUR3_10108-P1};
TRINITY_DN91577_c0_g1_i1	tr|A0A1D6C081|A0A1D6C081_WHEAT	184	1.2e-74	288.1	95		A0A1D6C081_WHEAT	Uncharacterized protein	SubName: Full=Uncharacterized protein {ECO:0000313|EnsemblPlants:TRIAE_CS42_7AS_TGACv1_571203_AA1845850.1};
TRINITY_DN91577_c0_g2_i1	tr|A0A1D5VPI2|A0A1D5VPI2_WHEAT	249	3e-85	323.6	94.5		A0A1D5VPI2_WHEAT	Uncharacterized protein	SubName: Full=Uncharacterized protein {ECO:0000313|EnsemblPlants:TRIAE_CS42_3B_TGACv1_220736_AA0717600.1};
TRINITY_DN91565_c0_g1_i1	tr|A0A1D5YUR2|A0A1D5YUR2_WHEAT	103	2.5e-42	179.9	99.7		A0A1D5YUR2_WHEAT	Dirigent protein	RecName: Full=Dirigent protein {ECO:0000256|RuleBase:RU363099};
TRINITY_DN91565_c0_g1_i2	tr|A0A1D5ZG06|A0A1D5ZG06_WHEAT	176	9.5e-88	332	72.1		A0A1D5ZG06_WHEAT	Dirigent protein	RecName: Full=Dirigent protein {ECO:0000256|RuleBase:RU363099};
TRINITY_DN91543_c0_g1_i6	tr|A0A287RWG1|A0A287RWG1_HORVV	59	1e-10	76.3	22.2		A0A287RWG1_HORVV	Uncharacterized protein	SubName: Full=Uncharacterized protein {ECO:0000313|EnsemblPlants:HORVU5Hr1G077580.4};
TRINITY_DN91543_c0_g1_i5	tr|A0A287RWF6|A0A287RWF6_HORVV	47	2.4e-05	58.5	16.1		A0A287RWF6_HORVV	Uncharacterized protein	SubName: Full=Uncharacterized protein {ECO:0000313|EnsemblPlants:HORVU5Hr1G077580.14};
TRINITY_DN91568_c0_g1_i1	tr|A0A1D6AC84|A0A1D6AC84_WHEAT	123	2.8e-64	253.1	100		A0A1D6AC84_WHEAT	Uncharacterized protein	SubName: Full=Uncharacterized protein {ECO:0000313|EnsemblPlants:TRIAE_CS42_6AL_TGACv1_473413_AA1530970.3};
TRINITY_DN91568_c0_g2_i1	tr|A0A1D5X4N5|A0A1D5X4N5_WHEAT	89	7.3e-38	164.9	100		A0A1D5X4N5_WHEAT	Uncharacterized protein	SubName: Full=Uncharacterized protein {ECO:0000313|EnsemblPlants:TRIAE_CS42_4AL_TGACv1_289759_AA0976440.1};
TRINITY_DN91568_c1_g1_i1	tr|A0A1D5YNQ5|A0A1D5YNQ5_WHEAT	92	3.6e-48	199.1	98.6		A0A1D5YNQ5_WHEAT	Uncharacterized protein	SubName: Full=Uncharacterized protein {ECO:0000313|EnsemblPlants:TRIAE_CS42_5AL_TGACv1_376922_AA1242420.1};
TRINITY_DN91589_c0_g1_i1	tr|A0A0N4UKE1|A0A0N4UKE1_DRAME	92	2.3e-10	74.3	57.6		A0A0N4UKE1_DRAME	Receptor expression-enhancing protein	RecName: Full=Receptor expression-enhancing protein {ECO:0000256|RuleBase:RU362006};
TRINITY_DN91589_c0_g1_i2	tr|A0A0N4UKE1|A0A0N4UKE1_DRAME	92	8e-11	75.9	57.6		A0A0N4UKE1_DRAME	Receptor expression-enhancing protein	RecName: Full=Receptor expression-enhancing protein {ECO:0000256|RuleBase:RU362006};
TRINITY_DN91505_c0_g1_i1	tr|M2T558|M2T558_COCSN	103	2.7e-51	209.9	85.1	ORFNames=COCSADRAFT_160353 {ECO:0000313|EMBL:EMD64107.1};	M2T558_COCSN	Uncharacterized protein	SubName: Full=Uncharacterized protein {ECO:0000313|EMBL:EMD64107.1};
TRINITY_DN91540_c0_g2_i1	tr|Q9I892|Q9I892_CYPCA	169	3e-90	340.5	60.9		Q9I892_CYPCA	Myosin regulatory light chain	SubName: Full=Myosin regulatory light chain {ECO:0000313|EMBL:BAA89705.1};
TRINITY_DN91513_c0_g1_i1	tr|A0A1D5UDS2|A0A1D5UDS2_WHEAT	31	4.6e-09	69.3	31.1		A0A1D5UDS2_WHEAT	Uncharacterized protein	SubName: Full=Uncharacterized protein {ECO:0000313|EnsemblPlants:TRIAE_CS42_2BS_TGACv1_147626_AA0485790.2};
TRINITY_DN91504_c0_g1_i1	tr|M8CW35|M8CW35_AEGTA	50	5.6e-18	98.6	64.9	ORFNames=F775_25190 {ECO:0000313|EMBL:EMT31862.1};	M8CW35_AEGTA	Uncharacterized protein	SubName: Full=Uncharacterized protein {ECO:0000313|EMBL:EMT31862.1, ECO:0000313|EnsemblPlants:EMT31862};
TRINITY_DN30105_c0_g1_i5	tr|A0A1D6DG49|A0A1D6DG49_WHEAT	59	6.3e-23	116.7	23.9		A0A1D6DG49_WHEAT	Uncharacterized protein	SubName: Full=Uncharacterized protein {ECO:0000313|EnsemblPlants:TRIAE_CS42_U_TGACv1_642514_AA2118820.1};
TRINITY_DN30105_c0_g1_i3	tr|M7ZSM7|M7ZSM7_TRIUA	94	3.7e-46	193.4	54.4	ORFNames=TRIUR3_09956 {ECO:0000313|EMBL:EMS63122.1};	M7ZSM7_TRIUA	Uncharacterized protein	SubName: Full=Uncharacterized protein {ECO:0000313|EMBL:EMS63122.1, ECO:0000313|EnsemblPlants:TRIUR3_09956-P1};
TRINITY_DN30105_c0_g1_i1	tr|M7ZSM7|M7ZSM7_TRIUA	69	1.8e-26	127.5	54.6	ORFNames=TRIUR3_09956 {ECO:0000313|EMBL:EMS63122.1};	M7ZSM7_TRIUA	Uncharacterized protein	SubName: Full=Uncharacterized protein {ECO:0000313|EMBL:EMS63122.1, ECO:0000313|EnsemblPlants:TRIUR3_09956-P1};
TRINITY_DN30105_c0_g1_i2	tr|A0A1D6DG49|A0A1D6DG49_WHEAT	59	6.3e-23	116.7	23.9		A0A1D6DG49_WHEAT	Uncharacterized protein	SubName: Full=Uncharacterized protein {ECO:0000313|EnsemblPlants:TRIAE_CS42_U_TGACv1_642514_AA2118820.1};
TRINITY_DN30105_c0_g1_i4	tr|M7ZSM7|M7ZSM7_TRIUA	94	7.9e-41	175.6	55	ORFNames=TRIUR3_09956 {ECO:0000313|EMBL:EMS63122.1};	M7ZSM7_TRIUA	Uncharacterized protein	SubName: Full=Uncharacterized protein {ECO:0000313|EMBL:EMS63122.1, ECO:0000313|EnsemblPlants:TRIUR3_09956-P1};
TRINITY_DN30105_c0_g1_i6	tr|M7ZSM7|M7ZSM7_TRIUA	94	3.3e-35	157.5	37.1	ORFNames=TRIUR3_09956 {ECO:0000313|EMBL:EMS63122.1};	M7ZSM7_TRIUA	Uncharacterized protein	SubName: Full=Uncharacterized protein {ECO:0000313|EMBL:EMS63122.1, ECO:0000313|EnsemblPlants:TRIUR3_09956-P1};
TRINITY_DN30180_c0_g2_i6	tr|A0A1D5WE09|A0A1D5WE09_WHEAT	98	5.8e-44	185.7	70.8		A0A1D5WE09_WHEAT	Uncharacterized protein	SubName: Full=Uncharacterized protein {ECO:0000313|EnsemblPlants:TRIAE_CS42_3DL_TGACv1_249310_AA0844920.1};
TRINITY_DN30180_c0_g2_i2	tr|A0A1D5VDH0|A0A1D5VDH0_WHEAT	343	1.3e-180	641.3	76.2		A0A1D5VDH0_WHEAT	Uncharacterized protein	SubName: Full=Uncharacterized protein {ECO:0000313|EnsemblPlants:TRIAE_CS42_3AL_TGACv1_196181_AA0657930.2};
TRINITY_DN30180_c0_g2_i3	tr|A0A1D5WE09|A0A1D5WE09_WHEAT	438	5.9e-240	838.6	94.5		A0A1D5WE09_WHEAT	Uncharacterized protein	SubName: Full=Uncharacterized protein {ECO:0000313|EnsemblPlants:TRIAE_CS42_3DL_TGACv1_249310_AA0844920.1};
TRINITY_DN30180_c0_g2_i5	tr|A0A1D5WE09|A0A1D5WE09_WHEAT	438	3.7e-234	819.3	94.5		A0A1D5WE09_WHEAT	Uncharacterized protein	SubName: Full=Uncharacterized protein {ECO:0000313|EnsemblPlants:TRIAE_CS42_3DL_TGACv1_249310_AA0844920.1};
TRINITY_DN30180_c0_g2_i7	tr|A0A1D5VDH0|A0A1D5VDH0_WHEAT	456	7.6e-248	865.1	76.7		A0A1D5VDH0_WHEAT	Uncharacterized protein	SubName: Full=Uncharacterized protein {ECO:0000313|EnsemblPlants:TRIAE_CS42_3AL_TGACv1_196181_AA0657930.2};
TRINITY_DN30180_c0_g2_i8	tr|A0A1D5WE09|A0A1D5WE09_WHEAT	98	9.7e-50	204.9	72.1		A0A1D5WE09_WHEAT	Uncharacterized protein	SubName: Full=Uncharacterized protein {ECO:0000313|EnsemblPlants:TRIAE_CS42_3DL_TGACv1_249310_AA0844920.1};
TRINITY_DN30180_c0_g2_i4	tr|A0A1D5WE09|A0A1D5WE09_WHEAT	98	1.6e-49	204.1	73.3		A0A1D5WE09_WHEAT	Uncharacterized protein	SubName: Full=Uncharacterized protein {ECO:0000313|EnsemblPlants:TRIAE_CS42_3DL_TGACv1_249310_AA0844920.1};
TRINITY_DN30180_c0_g1_i6	tr|A0A1D5W726|A0A1D5W726_WHEAT	379	7.9e-202	713.4	29.5		A0A1D5W726_WHEAT	Uncharacterized protein	SubName: Full=Uncharacterized protein {ECO:0000313|EnsemblPlants:TRIAE_CS42_3B_TGACv1_225007_AA0803990.1};
TRINITY_DN30180_c0_g1_i5	tr|A0A1D5W726|A0A1D5W726_WHEAT	379	8.1e-202	713.4	28.8		A0A1D5W726_WHEAT	Uncharacterized protein	SubName: Full=Uncharacterized protein {ECO:0000313|EnsemblPlants:TRIAE_CS42_3B_TGACv1_225007_AA0803990.1};
TRINITY_DN30180_c0_g1_i4	tr|A0A1D5W726|A0A1D5W726_WHEAT	280	1.7e-148	536.2	21.8		A0A1D5W726_WHEAT	Uncharacterized protein	SubName: Full=Uncharacterized protein {ECO:0000313|EnsemblPlants:TRIAE_CS42_3B_TGACv1_225007_AA0803990.1};
TRINITY_DN30180_c0_g1_i2	tr|A0A1D5W726|A0A1D5W726_WHEAT	379	5.2e-202	713.4	44.8		A0A1D5W726_WHEAT	Uncharacterized protein	SubName: Full=Uncharacterized protein {ECO:0000313|EnsemblPlants:TRIAE_CS42_3B_TGACv1_225007_AA0803990.1};
TRINITY_DN30180_c0_g1_i3	tr|A0A1D5W726|A0A1D5W726_WHEAT	280	1.8e-148	536.2	21.3		A0A1D5W726_WHEAT	Uncharacterized protein	SubName: Full=Uncharacterized protein {ECO:0000313|EnsemblPlants:TRIAE_CS42_3B_TGACv1_225007_AA0803990.1};
TRINITY_DN30180_c1_g1_i1	tr|M8C2Y8|M8C2Y8_AEGTA	32	0.00014	56.6	7.1	ORFNames=F775_28081 {ECO:0000313|EMBL:EMT28609.1};	M8C2Y8_AEGTA	Histone-lysine N-methyltransferase, H3 lysine-9 specific SUVH4	SubName: Full=Histone-lysine N-methyltransferase, H3 lysine-9 specific SUVH4 {ECO:0000313|EMBL:EMT28609.1, ECO:0000313|EnsemblPlants:EMT28609};
TRINITY_DN30180_c1_g1_i3	tr|M8C2Y8|M8C2Y8_AEGTA	32	0.00014	56.6	7.1	ORFNames=F775_28081 {ECO:0000313|EMBL:EMT28609.1};	M8C2Y8_AEGTA	Histone-lysine N-methyltransferase, H3 lysine-9 specific SUVH4	SubName: Full=Histone-lysine N-methyltransferase, H3 lysine-9 specific SUVH4 {ECO:0000313|EMBL:EMT28609.1, ECO:0000313|EnsemblPlants:EMT28609};
TRINITY_DN30180_c1_g1_i2	tr|M8C2Y8|M8C2Y8_AEGTA	36	7.8e-06	60.8	7.7	ORFNames=F775_28081 {ECO:0000313|EMBL:EMT28609.1};	M8C2Y8_AEGTA	Histone-lysine N-methyltransferase, H3 lysine-9 specific SUVH4	SubName: Full=Histone-lysine N-methyltransferase, H3 lysine-9 specific SUVH4 {ECO:0000313|EMBL:EMT28609.1, ECO:0000313|EnsemblPlants:EMT28609};
TRINITY_DN30180_c1_g1_i6	tr|M8C2Y8|M8C2Y8_AEGTA	36	7.8e-06	60.8	7.7	ORFNames=F775_28081 {ECO:0000313|EMBL:EMT28609.1};	M8C2Y8_AEGTA	Histone-lysine N-methyltransferase, H3 lysine-9 specific SUVH4	SubName: Full=Histone-lysine N-methyltransferase, H3 lysine-9 specific SUVH4 {ECO:0000313|EMBL:EMT28609.1, ECO:0000313|EnsemblPlants:EMT28609};
TRINITY_DN30189_c0_g1_i1	tr|A0A1D6ANW5|A0A1D6ANW5_WHEAT	77	5.5e-05	55.5	97		A0A1D6ANW5_WHEAT	Uncharacterized protein	SubName: Full=Uncharacterized protein {ECO:0000313|EnsemblPlants:TRIAE_CS42_6BL_TGACv1_500188_AA1600850.1};
TRINITY_DN30198_c1_g1_i1	tr|F5BU33|F5BU33_9EUKA	71	4e-31	142.1	99.1		F5BU33_9EUKA	Actin	SubName: Full=Actin {ECO:0000313|EMBL:AEC48663.1}; Flags: Fragment;
TRINITY_DN30198_c2_g1_i1	tr|C1IZ00|C1IZ00_9STRA	103	4.5e-47	195.7	99.7		C1IZ00_9STRA	Actin	SubName: Full=Actin {ECO:0000313|EMBL:ACM78541.1}; Flags: Fragment;
TRINITY_DN30198_c5_g1_i1	tr|A0ER71|A0ER71_9STRA	72	1.5e-28	133.7	98.2		A0ER71_9STRA	Actin	SubName: Full=Actin {ECO:0000313|EMBL:ABC85745.1}; Flags: Fragment;
TRINITY_DN30107_c0_g1_i1	tr|A0A287FKN4|A0A287FKN4_HORVV	120	4.4e-39	169.9	69		A0A287FKN4_HORVV	Uncharacterized protein	SubName: Full=Uncharacterized protein {ECO:0000313|EnsemblPlants:HORVU1Hr1G052310.44};
TRINITY_DN30107_c0_g2_i1	tr|A0A1D6C8S6|A0A1D6C8S6_WHEAT	112	7.7e-46	192.6	53.6		A0A1D6C8S6_WHEAT	Uncharacterized protein	SubName: Full=Uncharacterized protein {ECO:0000313|EnsemblPlants:TRIAE_CS42_7BL_TGACv1_578420_AA1894440.1};
TRINITY_DN30107_c1_g1_i3	tr|A0A287FKN4|A0A287FKN4_HORVV	132	7.2e-26	125.6	99.5		A0A287FKN4_HORVV	Uncharacterized protein	SubName: Full=Uncharacterized protein {ECO:0000313|EnsemblPlants:HORVU1Hr1G052310.44};
TRINITY_DN30107_c1_g1_i4	tr|A0A287FKN4|A0A287FKN4_HORVV	106	7.6e-08	65.5	92.4		A0A287FKN4_HORVV	Uncharacterized protein	SubName: Full=Uncharacterized protein {ECO:0000313|EnsemblPlants:HORVU1Hr1G052310.44};
TRINITY_DN30107_c2_g1_i1	tr|A0A287FKN4|A0A287FKN4_HORVV	72	2.7e-13	82.8	97		A0A287FKN4_HORVV	Uncharacterized protein	SubName: Full=Uncharacterized protein {ECO:0000313|EnsemblPlants:HORVU1Hr1G052310.44};
TRINITY_DN30107_c3_g1_i1	tr|A0A1D6C8S6|A0A1D6C8S6_WHEAT	93	6.9e-39	168.3	99.6		A0A1D6C8S6_WHEAT	Uncharacterized protein	SubName: Full=Uncharacterized protein {ECO:0000313|EnsemblPlants:TRIAE_CS42_7BL_TGACv1_578420_AA1894440.1};
TRINITY_DN30147_c0_g1_i1	tr|M8ALX7|M8ALX7_TRIUA	141	9.3e-74	285	81.7	ORFNames=TRIUR3_24279 {ECO:0000313|EMBL:EMS66065.1};	M8ALX7_TRIUA	Uncharacterized protein	SubName: Full=Uncharacterized protein {ECO:0000313|EMBL:EMS66065.1, ECO:0000313|EnsemblPlants:TRIUR3_24279-P1};
TRINITY_DN30147_c0_g1_i3	tr|A0A1D6A7Y3|A0A1D6A7Y3_WHEAT	120	3.3e-62	247.3	46		A0A1D6A7Y3_WHEAT	Uncharacterized protein	SubName: Full=Uncharacterized protein {ECO:0000313|EnsemblPlants:TRIAE_CS42_6AL_TGACv1_471678_AA1512640.1};
TRINITY_DN30147_c0_g1_i4	tr|A0A1D6A7Y3|A0A1D6A7Y3_WHEAT	483	6e-261	908.7	80.6		A0A1D6A7Y3_WHEAT	Uncharacterized protein	SubName: Full=Uncharacterized protein {ECO:0000313|EnsemblPlants:TRIAE_CS42_6AL_TGACv1_471678_AA1512640.1};
TRINITY_DN30152_c0_g1_i1	tr|M8D3Z8|M8D3Z8_AEGTA	74	4.3e-32	145.6	87.4	ORFNames=F775_14681 {ECO:0000313|EMBL:EMT31021.1};	M8D3Z8_AEGTA	Putative LRR receptor-like serine/threonine-protein kinase	SubName: Full=Putative LRR receptor-like serine/threonine-protein kinase {ECO:0000313|EMBL:EMT31021.1, ECO:0000313|EnsemblPlants:EMT31021};
TRINITY_DN30126_c0_g1_i5	tr|A0A287F0G8|A0A287F0G8_HORVV	27	1.3e-06	62.8	9.2		A0A287F0G8_HORVV	Uncharacterized protein	SubName: Full=Uncharacterized protein {ECO:0000313|EnsemblPlants:HORVU1Hr1G028450.2};
TRINITY_DN30126_c0_g1_i4	tr|A0A287F0G8|A0A287F0G8_HORVV	27	1.2e-06	62.8	9.7		A0A287F0G8_HORVV	Uncharacterized protein	SubName: Full=Uncharacterized protein {ECO:0000313|EnsemblPlants:HORVU1Hr1G028450.2};
TRINITY_DN30126_c0_g1_i1	tr|A0A287F0G8|A0A287F0G8_HORVV	27	1.4e-06	62.8	8.7		A0A287F0G8_HORVV	Uncharacterized protein	SubName: Full=Uncharacterized protein {ECO:0000313|EnsemblPlants:HORVU1Hr1G028450.2};
TRINITY_DN30122_c0_g1_i4	tr|W5BGR4|W5BGR4_WHEAT	175	2.1e-89	337	99.4		W5BGR4_WHEAT	Uncharacterized protein	SubName: Full=Uncharacterized protein {ECO:0000313|EnsemblPlants:TRIAE_CS42_2BL_TGACv1_129526_AA0387270.1};
TRINITY_DN30122_c0_g1_i1	tr|A0A1D5UMI0|A0A1D5UMI0_WHEAT	175	1.2e-89	337.8	99.4		A0A1D5UMI0_WHEAT	Uncharacterized protein	SubName: Full=Uncharacterized protein {ECO:0000313|EnsemblPlants:TRIAE_CS42_2DL_TGACv1_159155_AA0533530.1};
TRINITY_DN30122_c0_g2_i2	tr|M7Z8S7|M7Z8S7_TRIUA	81	6.2e-36	158.3	100	ORFNames=TRIUR3_16643 {ECO:0000313|EMBL:EMS56432.1};	M7Z8S7_TRIUA	ABC transporter B family member 19	SubName: Full=ABC transporter B family member 19 {ECO:0000313|EMBL:EMS56432.1, ECO:0000313|EnsemblPlants:TRIUR3_16643-P1};
TRINITY_DN30122_c0_g2_i1	tr|I1J2G2|I1J2G2_BRADI	115	5.4e-57	228.8	98.9	Name=LOC100827120 {ECO:0000313|EnsemblPlants:BRADI5G23600.1}; ORFNames=BRADI_5g23600 {ECO:0000313|EMBL:KQJ84902.1};	I1J2G2_BRADI	Uncharacterized protein	SubName: Full=Uncharacterized protein {ECO:0000313|EMBL:KQJ84902.1, ECO:0000313|EnsemblPlants:BRADI5G23600.1};
TRINITY_DN30122_c0_g3_i1	tr|A0A1D5UQR2|A0A1D5UQR2_WHEAT	186	3.8e-97	362.8	99.3		A0A1D5UQR2_WHEAT	Uncharacterized protein	SubName: Full=Uncharacterized protein {ECO:0000313|EnsemblPlants:TRIAE_CS42_2DL_TGACv1_160152_AA0547580.1};
TRINITY_DN30130_c0_g1_i2	tr|A0A1D6RU50|A0A1D6RU50_WHEAT	128	5.3e-66	258.8	99.5		A0A1D6RU50_WHEAT	Uncharacterized protein	SubName: Full=Uncharacterized protein {ECO:0000313|EnsemblPlants:TRIAE_CS42_3DS_TGACv1_271614_AA0903920.1};
TRINITY_DN30130_c0_g1_i6	tr|A0A1D6RU50|A0A1D6RU50_WHEAT	184	4e-96	359.8	80.1		A0A1D6RU50_WHEAT	Uncharacterized protein	SubName: Full=Uncharacterized protein {ECO:0000313|EnsemblPlants:TRIAE_CS42_3DS_TGACv1_271614_AA0903920.1};
TRINITY_DN30130_c0_g1_i5	tr|A0A1D5VLG2|A0A1D5VLG2_WHEAT	191	1.1e-103	384.8	86.6		A0A1D5VLG2_WHEAT	Uncharacterized protein	SubName: Full=Uncharacterized protein {ECO:0000313|EnsemblPlants:TRIAE_CS42_3AS_TGACv1_212399_AA0700600.1};
TRINITY_DN30130_c0_g1_i1	tr|A0A1D5VYJ2|A0A1D5VYJ2_WHEAT	192	8.7e-104	385.2	85		A0A1D5VYJ2_WHEAT	Uncharacterized protein	SubName: Full=Uncharacterized protein {ECO:0000313|EnsemblPlants:TRIAE_CS42_3B_TGACv1_222391_AA0763730.1};
TRINITY_DN30130_c0_g1_i3	tr|A0A1D5VYJ2|A0A1D5VYJ2_WHEAT	192	1.6e-102	380.9	85		A0A1D5VYJ2_WHEAT	Uncharacterized protein	SubName: Full=Uncharacterized protein {ECO:0000313|EnsemblPlants:TRIAE_CS42_3B_TGACv1_222391_AA0763730.1};
TRINITY_DN30140_c0_g1_i1	tr|N1QV64|N1QV64_AEGTA	69	5.2e-31	142.1	74.7	ORFNames=F775_13213 {ECO:0000313|EMBL:EMT14058.1};	N1QV64_AEGTA	Uncharacterized protein	SubName: Full=Uncharacterized protein {ECO:0000313|EMBL:EMT14058.1, ECO:0000313|EnsemblPlants:EMT14058};
TRINITY_DN30140_c0_g1_i2	tr|N1QV64|N1QV64_AEGTA	69	8e-31	142.1	48.7	ORFNames=F775_13213 {ECO:0000313|EMBL:EMT14058.1};	N1QV64_AEGTA	Uncharacterized protein	SubName: Full=Uncharacterized protein {ECO:0000313|EMBL:EMT14058.1, ECO:0000313|EnsemblPlants:EMT14058};
TRINITY_DN30140_c0_g1_i3	tr|N1QV64|N1QV64_AEGTA	69	1e-30	141.7	48.7	ORFNames=F775_13213 {ECO:0000313|EMBL:EMT14058.1};	N1QV64_AEGTA	Uncharacterized protein	SubName: Full=Uncharacterized protein {ECO:0000313|EMBL:EMT14058.1, ECO:0000313|EnsemblPlants:EMT14058};
TRINITY_DN30140_c0_g2_i1	tr|A0A1D5TPA7|A0A1D5TPA7_WHEAT	90	1.8e-44	187.2	78.9		A0A1D5TPA7_WHEAT	Uncharacterized protein	SubName: Full=Uncharacterized protein {ECO:0000313|EnsemblPlants:TRIAE_CS42_2AS_TGACv1_113679_AA0359250.1};
TRINITY_DN30140_c0_g2_i2	tr|A0A1D5TPA7|A0A1D5TPA7_WHEAT	90	1.7e-44	187.2	83.3		A0A1D5TPA7_WHEAT	Uncharacterized protein	SubName: Full=Uncharacterized protein {ECO:0000313|EnsemblPlants:TRIAE_CS42_2AS_TGACv1_113679_AA0359250.1};
TRINITY_DN30140_c0_g3_i1	tr|W5BMZ9|W5BMZ9_WHEAT	103	1.9e-51	211.1	52.7		W5BMZ9_WHEAT	Uncharacterized protein	SubName: Full=Uncharacterized protein {ECO:0000313|EnsemblPlants:TRIAE_CS42_2BS_TGACv1_146544_AA0467910.1};
TRINITY_DN30140_c0_g3_i2	tr|W5BMZ9|W5BMZ9_WHEAT	103	2.5e-51	210.3	69.9		W5BMZ9_WHEAT	Uncharacterized protein	SubName: Full=Uncharacterized protein {ECO:0000313|EnsemblPlants:TRIAE_CS42_2BS_TGACv1_146544_AA0467910.1};
TRINITY_DN30140_c1_g1_i2	tr|A0A1D5VC78|A0A1D5VC78_WHEAT	121	6.8e-58	231.9	96.5		A0A1D5VC78_WHEAT	Uncharacterized protein	SubName: Full=Uncharacterized protein {ECO:0000313|EnsemblPlants:TRIAE_CS42_3AL_TGACv1_195613_AA0651930.2};
TRINITY_DN30140_c1_g1_i1	tr|A0A1D5VC78|A0A1D5VC78_WHEAT	121	6.8e-58	231.9	96.5		A0A1D5VC78_WHEAT	Uncharacterized protein	SubName: Full=Uncharacterized protein {ECO:0000313|EnsemblPlants:TRIAE_CS42_3AL_TGACv1_195613_AA0651930.2};
TRINITY_DN30101_c0_g1_i1	tr|W5G6G8|W5G6G8_WHEAT	245	1.4e-49	206.1	52.9		W5G6G8_WHEAT	Uncharacterized protein	SubName: Full=Uncharacterized protein {ECO:0000313|EnsemblPlants:TRIAE_CS42_6AL_TGACv1_471436_AA1508760.1};
TRINITY_DN30101_c0_g1_i2	tr|W5G6G8|W5G6G8_WHEAT	245	3.8e-50	208	53		W5G6G8_WHEAT	Uncharacterized protein	SubName: Full=Uncharacterized protein {ECO:0000313|EnsemblPlants:TRIAE_CS42_6AL_TGACv1_471436_AA1508760.1};
TRINITY_DN30101_c0_g2_i6	tr|W5GXR0|W5GXR0_WHEAT	366	8e-122	446.8	49.1		W5GXR0_WHEAT	Uncharacterized protein	SubName: Full=Uncharacterized protein {ECO:0000313|EnsemblPlants:TRIAE_CS42_6DL_TGACv1_527230_AA1700850.1};
TRINITY_DN30101_c0_g2_i4	tr|W5GXR0|W5GXR0_WHEAT	366	8.1e-122	446.8	48.9		W5GXR0_WHEAT	Uncharacterized protein	SubName: Full=Uncharacterized protein {ECO:0000313|EnsemblPlants:TRIAE_CS42_6DL_TGACv1_527230_AA1700850.1};
TRINITY_DN30101_c0_g2_i8	tr|W5GXR0|W5GXR0_WHEAT	253	2.2e-92	348.6	46.9		W5GXR0_WHEAT	Uncharacterized protein	SubName: Full=Uncharacterized protein {ECO:0000313|EnsemblPlants:TRIAE_CS42_6DL_TGACv1_527230_AA1700850.1};
TRINITY_DN30169_c0_g1_i1	tr|A0A287HEC7|A0A287HEC7_HORVV	37	2.4e-08	67.8	21.1		A0A287HEC7_HORVV	Uncharacterized protein	SubName: Full=Uncharacterized protein {ECO:0000313|EnsemblPlants:HORVU2Hr1G024610.3};
TRINITY_DN30169_c0_g1_i3	tr|A0A287HEC7|A0A287HEC7_HORVV	37	2.9e-08	67.8	17.2		A0A287HEC7_HORVV	Uncharacterized protein	SubName: Full=Uncharacterized protein {ECO:0000313|EnsemblPlants:HORVU2Hr1G024610.3};
TRINITY_DN30169_c0_g1_i5	tr|A0A287HEC7|A0A287HEC7_HORVV	37	2.4e-08	67.8	20.8		A0A287HEC7_HORVV	Uncharacterized protein	SubName: Full=Uncharacterized protein {ECO:0000313|EnsemblPlants:HORVU2Hr1G024610.3};
TRINITY_DN30167_c0_g1_i3	tr|W5FA04|W5FA04_WHEAT	55	1.2e-24	120.6	80.9		W5FA04_WHEAT	Uncharacterized protein	SubName: Full=Uncharacterized protein {ECO:0000313|EnsemblPlants:TRIAE_CS42_5BL_TGACv1_405690_AA1333120.1};
TRINITY_DN30167_c0_g1_i4	tr|W5FA04|W5FA04_WHEAT	173	2.8e-59	237.7	51.6		W5FA04_WHEAT	Uncharacterized protein	SubName: Full=Uncharacterized protein {ECO:0000313|EnsemblPlants:TRIAE_CS42_5BL_TGACv1_405690_AA1333120.1};
TRINITY_DN30167_c0_g1_i6	tr|W5FA04|W5FA04_WHEAT	147	9.3e-79	302.4	51.7		W5FA04_WHEAT	Uncharacterized protein	SubName: Full=Uncharacterized protein {ECO:0000313|EnsemblPlants:TRIAE_CS42_5BL_TGACv1_405690_AA1333120.1};
TRINITY_DN30167_c0_g1_i1	tr|A0A1D6BPW2|A0A1D6BPW2_WHEAT	62	2.5e-27	130.6	42		A0A1D6BPW2_WHEAT	Uncharacterized protein	SubName: Full=Uncharacterized protein {ECO:0000313|EnsemblPlants:TRIAE_CS42_7AL_TGACv1_558169_AA1790860.2};
TRINITY_DN30167_c0_g1_i2	tr|W5FA04|W5FA04_WHEAT	101	1.2e-50	208.8	41.6		W5FA04_WHEAT	Uncharacterized protein	SubName: Full=Uncharacterized protein {ECO:0000313|EnsemblPlants:TRIAE_CS42_5BL_TGACv1_405690_AA1333120.1};
TRINITY_DN30167_c1_g1_i2	tr|M7ZB01|M7ZB01_TRIUA	39	6.7e-10	72.8	24.5	ORFNames=TRIUR3_34954 {ECO:0000313|EMBL:EMS45284.1};	M7ZB01_TRIUA	Uncharacterized protein	SubName: Full=Uncharacterized protein {ECO:0000313|EMBL:EMS45284.1, ECO:0000313|EnsemblPlants:TRIUR3_34954-P1};
TRINITY_DN30167_c1_g1_i3	tr|M7ZB01|M7ZB01_TRIUA	39	8.3e-10	72.8	19.8	ORFNames=TRIUR3_34954 {ECO:0000313|EMBL:EMS45284.1};	M7ZB01_TRIUA	Uncharacterized protein	SubName: Full=Uncharacterized protein {ECO:0000313|EMBL:EMS45284.1, ECO:0000313|EnsemblPlants:TRIUR3_34954-P1};
TRINITY_DN30167_c3_g1_i1	tr|A0A1D6RWY1|A0A1D6RWY1_WHEAT	56	2.2e-09	71.6	24.1		A0A1D6RWY1_WHEAT	Uncharacterized protein	SubName: Full=Uncharacterized protein {ECO:0000313|EnsemblPlants:TRIAE_CS42_4AS_TGACv1_308484_AA1028190.1};
TRINITY_DN30133_c0_g3_i1	tr|A0A1D5YFG8|A0A1D5YFG8_WHEAT	103	1.2e-24	123.6	16.3		A0A1D5YFG8_WHEAT	Uncharacterized protein	SubName: Full=Uncharacterized protein {ECO:0000313|EnsemblPlants:TRIAE_CS42_5AL_TGACv1_374698_AA1206890.1};
TRINITY_DN30139_c0_g2_i2	tr|A0A1D5S2U4|A0A1D5S2U4_WHEAT	75	1.1e-10	74.7	71.6		A0A1D5S2U4_WHEAT	Uncharacterized protein	SubName: Full=Uncharacterized protein {ECO:0000313|EnsemblPlants:TRIAE_CS42_1AS_TGACv1_019578_AA0068670.1};
TRINITY_DN30139_c0_g2_i1	tr|A0A1D5S2U4|A0A1D5S2U4_WHEAT	80	2.8e-12	80.1	73.6		A0A1D5S2U4_WHEAT	Uncharacterized protein	SubName: Full=Uncharacterized protein {ECO:0000313|EnsemblPlants:TRIAE_CS42_1AS_TGACv1_019578_AA0068670.1};
TRINITY_DN30195_c0_g1_i5	sp|A2X5P7|INV1_ORYSI	22	2.2e-05	58.5	8.1	Name=CIN1; ORFNames=OsI_007390;	INV1_ORYSI	Beta-fructofuranosidase, insoluble isoenzyme 1; Cell wall beta-fructosidase 1; Invertase 1; OsCIN1; Sucrose hydrolase 1	RecName: Full=Beta-fructofuranosidase, insoluble isoenzyme 1; EC=3.2.1.26; AltName: Full=Cell wall beta-fructosidase 1; AltName: Full=Invertase 1; AltName: Full=OsCIN1; AltName: Full=Sucrose hydrolase 1; Flags: Precursor;
TRINITY_DN30195_c0_g1_i2	sp|A2X5P7|INV1_ORYSI	22	2.3e-05	58.5	7.9	Name=CIN1; ORFNames=OsI_007390;	INV1_ORYSI	Beta-fructofuranosidase, insoluble isoenzyme 1; Cell wall beta-fructosidase 1; Invertase 1; OsCIN1; Sucrose hydrolase 1	RecName: Full=Beta-fructofuranosidase, insoluble isoenzyme 1; EC=3.2.1.26; AltName: Full=Cell wall beta-fructosidase 1; AltName: Full=Invertase 1; AltName: Full=OsCIN1; AltName: Full=Sucrose hydrolase 1; Flags: Precursor;
TRINITY_DN30170_c0_g1_i4	tr|D7MHY1|D7MHY1_ARALL	171	1.2e-84	321.2	99.4	ORFNames=ARALYDRAFT_915730 {ECO:0000313|EMBL:EFH46718.1};	D7MHY1_ARALL	Polyubiquitin	SubName: Full=Polyubiquitin {ECO:0000313|EMBL:EFH46718.1};
TRINITY_DN30170_c0_g1_i3	tr|D7MHY1|D7MHY1_ARALL	167	3.1e-82	313.2	99.2	ORFNames=ARALYDRAFT_915730 {ECO:0000313|EMBL:EFH46718.1};	D7MHY1_ARALL	Polyubiquitin	SubName: Full=Polyubiquitin {ECO:0000313|EMBL:EFH46718.1};
TRINITY_DN30170_c0_g2_i1	tr|A0A0G4LZJ2|A0A0G4LZJ2_9PEZI	70	3.4e-30	139	100	ORFNames=BN1723_013971 {ECO:0000313|EMBL:CRK27456.1};	A0A0G4LZJ2_9PEZI	Uncharacterized protein	SubName: Full=Uncharacterized protein {ECO:0000313|EMBL:CRK27456.1};
TRINITY_DN30170_c0_g3_i1	tr|A0A1D6D934|A0A1D6D934_WHEAT	46	2.6e-16	94.4	24.2		A0A1D6D934_WHEAT	Uncharacterized protein	SubName: Full=Uncharacterized protein {ECO:0000313|EnsemblPlants:TRIAE_CS42_U_TGACv1_641050_AA2083320.1};
TRINITY_DN30170_c0_g3_i2	tr|A0A1D6D934|A0A1D6D934_WHEAT	46	3.1e-16	94.4	20.2		A0A1D6D934_WHEAT	Uncharacterized protein	SubName: Full=Uncharacterized protein {ECO:0000313|EnsemblPlants:TRIAE_CS42_U_TGACv1_641050_AA2083320.1};
TRINITY_DN30170_c1_g1_i1	tr|A0A022PVX1|A0A022PVX1_ERYGU	73	7.2e-29	134.8	92	ORFNames=MIMGU_mgv1a015002mg {ECO:0000313|EMBL:EYU19679.1};	A0A022PVX1_ERYGU	Uncharacterized protein	SubName: Full=Uncharacterized protein {ECO:0000313|EMBL:EYU19679.1};
TRINITY_DN30170_c2_g1_i3	tr|D7NIZ1|D7NIZ1_CATRO	69	4.6e-27	128.6	97.6		D7NIZ1_CATRO	Ubiquitin	SubName: Full=Ubiquitin {ECO:0000313|EMBL:ADD52202.1};
TRINITY_DN30170_c2_g1_i1	tr|A0A1U8NGX1|A0A1U8NGX1_GOSHI	73	2.4e-31	142.9	99.1	Name=LOC107948317 {ECO:0000313|RefSeq:XP_016738302.1}; Synonyms=LOC107899654 {ECO:0000313|RefSeq:XP_016680914.1}, LOC107933786 {ECO:0000313|RefSeq:XP_016721559.1};	A0A1U8NGX1_GOSHI	polyubiquitin-like	SubName: Full=polyubiquitin-like {ECO:0000313|RefSeq:XP_016680914.1, ECO:0000313|RefSeq:XP_016721559.1, ECO:0000313|RefSeq:XP_016738302.1};
TRINITY_DN30115_c0_g1_i1	tr|M0UTF2|M0UTF2_HORVV	34	2.2e-06	60.5	34.3		M0UTF2_HORVV	Uncharacterized protein	SubName: Full=Uncharacterized protein {ECO:0000313|EnsemblPlants:HORVU2Hr1G099480.6};
TRINITY_DN30160_c0_g1_i6	tr|A0A1D5SJ59|A0A1D5SJ59_WHEAT	511	8.9e-138	499.6	80.3		A0A1D5SJ59_WHEAT	Uncharacterized protein	SubName: Full=Uncharacterized protein {ECO:0000313|EnsemblPlants:TRIAE_CS42_1BS_TGACv1_049465_AA0154210.1};
TRINITY_DN30160_c0_g1_i3	tr|A0A1D5SJ59|A0A1D5SJ59_WHEAT	511	8.6e-138	499.6	82.4		A0A1D5SJ59_WHEAT	Uncharacterized protein	SubName: Full=Uncharacterized protein {ECO:0000313|EnsemblPlants:TRIAE_CS42_1BS_TGACv1_049465_AA0154210.1};
TRINITY_DN30160_c0_g1_i1	tr|M7Z9K2|M7Z9K2_TRIUA	55	4.4e-25	123.6	26.3	ORFNames=TRIUR3_34922 {ECO:0000313|EMBL:EMS56306.1};	M7Z9K2_TRIUA	Pollen-specific leucine-rich repeat extensin-like protein 1	SubName: Full=Pollen-specific leucine-rich repeat extensin-like protein 1 {ECO:0000313|EMBL:EMS56306.1, ECO:0000313|EnsemblPlants:TRIUR3_34922-P1};
TRINITY_DN30160_c0_g1_i4	tr|A0A1D5SJ59|A0A1D5SJ59_WHEAT	511	8.6e-138	499.6	82.4		A0A1D5SJ59_WHEAT	Uncharacterized protein	SubName: Full=Uncharacterized protein {ECO:0000313|EnsemblPlants:TRIAE_CS42_1BS_TGACv1_049465_AA0154210.1};
TRINITY_DN30112_c0_g1_i5	tr|A0A0V0YW16|A0A0V0YW16_9BILA	32	1e-05	58.5	26.1	ORFNames=T12_9261 {ECO:0000313|EMBL:KRY04503.1};	A0A0V0YW16_9BILA	Uncharacterized protein	SubName: Full=Uncharacterized protein {ECO:0000313|EMBL:KRY04503.1}; Flags: Fragment;
TRINITY_DN30112_c0_g1_i2	tr|M8BRI9|M8BRI9_AEGTA	67	1.7e-06	60.8	67	ORFNames=F775_10992 {ECO:0000313|EMBL:EMT24418.1};	M8BRI9_AEGTA	Polygalacturonase	SubName: Full=Polygalacturonase {ECO:0000313|EMBL:EMT24418.1, ECO:0000313|EnsemblPlants:EMT24418};
TRINITY_DN30112_c0_g1_i1	tr|A0A0V0YW16|A0A0V0YW16_9BILA	32	8.4e-06	58.5	31.3	ORFNames=T12_9261 {ECO:0000313|EMBL:KRY04503.1};	A0A0V0YW16_9BILA	Uncharacterized protein	SubName: Full=Uncharacterized protein {ECO:0000313|EMBL:KRY04503.1}; Flags: Fragment;
TRINITY_DN30184_c0_g1_i1	tr|A0A1D5SBI0|A0A1D5SBI0_WHEAT	24	7.5e-05	55.1	29		A0A1D5SBI0_WHEAT	1,2-dihydroxy-3-keto-5-methylthiopentene dioxygenase; Acireductone dioxygenase (Fe(2+)-requiring); ARD; Fe-ARD	RecName: Full=1,2-dihydroxy-3-keto-5-methylthiopentene dioxygenase {ECO:0000256|HAMAP-Rule:MF_03154}; EC=1.13.11.54 {ECO:0000256|HAMAP-Rule:MF_03154}; AltName: Full=Acireductone dioxygenase (Fe(2+)-requiring) {ECO:0000256|HAMAP-Rule:MF_03154}; Short=ARD {ECO:0000256|HAMAP-Rule:MF_03154}; Short=Fe-ARD {ECO:0000256|HAMAP-Rule:MF_03154};
TRINITY_DN30184_c0_g1_i2	tr|M7YDF5|M7YDF5_TRIUA	24	2e-05	57	29	ORFNames=TRIUR3_12096 {ECO:0000313|EMBL:EMS45092.1};	M7YDF5_TRIUA	1,2-dihydroxy-3-keto-5-methylthiopentene dioxygenase; Acireductone dioxygenase (Fe(2+)-requiring); ARD; Fe-ARD	RecName: Full=1,2-dihydroxy-3-keto-5-methylthiopentene dioxygenase {ECO:0000256|HAMAP-Rule:MF_03154}; EC=1.13.11.54 {ECO:0000256|HAMAP-Rule:MF_03154}; AltName: Full=Acireductone dioxygenase (Fe(2+)-requiring) {ECO:0000256|HAMAP-Rule:MF_03154}; Short=ARD {ECO:0000256|HAMAP-Rule:MF_03154}; Short=Fe-ARD {ECO:0000256|HAMAP-Rule:MF_03154};
TRINITY_DN30188_c0_g1_i1	tr|A0A287WFK9|A0A287WFK9_HORVV	47	8.5e-14	86.3	20.5		A0A287WFK9_HORVV	Uncharacterized protein	SubName: Full=Uncharacterized protein {ECO:0000313|EnsemblPlants:HORVU7Hr1G049400.34};
TRINITY_DN30188_c0_g2_i1	tr|A0A1D6CJZ7|A0A1D6CJZ7_WHEAT	25	3.2e-05	56.2	31.5		A0A1D6CJZ7_WHEAT	Sodium/hydrogen exchanger	RecName: Full=Sodium/hydrogen exchanger {ECO:0000256|RuleBase:RU003722};
TRINITY_DN30143_c0_g1_i3	tr|A0A1D6CRE3|A0A1D6CRE3_WHEAT	260	2.5e-135	491.5	39.1		A0A1D6CRE3_WHEAT	Uncharacterized protein	SubName: Full=Uncharacterized protein {ECO:0000313|EnsemblPlants:TRIAE_CS42_7DL_TGACv1_603853_AA1990210.1};
TRINITY_DN30143_c0_g1_i4	tr|A0A1D6CRE3|A0A1D6CRE3_WHEAT	137	2e-69	271.2	56.1		A0A1D6CRE3_WHEAT	Uncharacterized protein	SubName: Full=Uncharacterized protein {ECO:0000313|EnsemblPlants:TRIAE_CS42_7DL_TGACv1_603853_AA1990210.1};
TRINITY_DN30143_c0_g1_i6	tr|A0A1D6CRE3|A0A1D6CRE3_WHEAT	300	4.9e-158	566.2	74.3		A0A1D6CRE3_WHEAT	Uncharacterized protein	SubName: Full=Uncharacterized protein {ECO:0000313|EnsemblPlants:TRIAE_CS42_7DL_TGACv1_603853_AA1990210.1};
TRINITY_DN30143_c0_g1_i1	tr|A0A1D6CRE3|A0A1D6CRE3_WHEAT	227	5.2e-115	424.1	32.6		A0A1D6CRE3_WHEAT	Uncharacterized protein	SubName: Full=Uncharacterized protein {ECO:0000313|EnsemblPlants:TRIAE_CS42_7DL_TGACv1_603853_AA1990210.1};
TRINITY_DN30143_c0_g1_i7	tr|A0A1D6CRE3|A0A1D6CRE3_WHEAT	260	2.4e-135	491.5	41.1		A0A1D6CRE3_WHEAT	Uncharacterized protein	SubName: Full=Uncharacterized protein {ECO:0000313|EnsemblPlants:TRIAE_CS42_7DL_TGACv1_603853_AA1990210.1};
TRINITY_DN30143_c0_g1_i2	tr|A0A1D6CRE3|A0A1D6CRE3_WHEAT	300	3.9e-158	566.6	71.3		A0A1D6CRE3_WHEAT	Uncharacterized protein	SubName: Full=Uncharacterized protein {ECO:0000313|EnsemblPlants:TRIAE_CS42_7DL_TGACv1_603853_AA1990210.1};
TRINITY_DN30143_c0_g1_i5	tr|A0A1D6CRE3|A0A1D6CRE3_WHEAT	260	2.5e-135	491.5	39.1		A0A1D6CRE3_WHEAT	Uncharacterized protein	SubName: Full=Uncharacterized protein {ECO:0000313|EnsemblPlants:TRIAE_CS42_7DL_TGACv1_603853_AA1990210.1};
TRINITY_DN30143_c0_g1_i9	tr|A0A1D6CRE3|A0A1D6CRE3_WHEAT	227	4e-115	424.5	32.6		A0A1D6CRE3_WHEAT	Uncharacterized protein	SubName: Full=Uncharacterized protein {ECO:0000313|EnsemblPlants:TRIAE_CS42_7DL_TGACv1_603853_AA1990210.1};
TRINITY_DN30158_c0_g1_i11	tr|I1HSB9|I1HSB9_BRADI	34	5.8e-05	58.9	3.7	Name=LOC100825085 {ECO:0000313|EnsemblPlants:BRADI2G51967.1};	I1HSB9_BRADI	Uncharacterized protein	SubName: Full=Uncharacterized protein {ECO:0000313|EnsemblPlants:BRADI2G51967.1};
TRINITY_DN30158_c0_g1_i10	tr|I1HSB9|I1HSB9_BRADI	34	3e-05	58.9	7.2	Name=LOC100825085 {ECO:0000313|EnsemblPlants:BRADI2G51967.1};	I1HSB9_BRADI	Uncharacterized protein	SubName: Full=Uncharacterized protein {ECO:0000313|EnsemblPlants:BRADI2G51967.1};
TRINITY_DN30166_c0_g1_i4	tr|A0A1D5U269|A0A1D5U269_WHEAT	151	3.1e-81	309.7	99.6		A0A1D5U269_WHEAT	Uncharacterized protein	SubName: Full=Uncharacterized protein {ECO:0000313|EnsemblPlants:TRIAE_CS42_2BL_TGACv1_131127_AA0422950.5};
TRINITY_DN30166_c0_g1_i5	tr|A0A1D5UIQ9|A0A1D5UIQ9_WHEAT	142	1.6e-74	287.3	99.1		A0A1D5UIQ9_WHEAT	Uncharacterized protein	SubName: Full=Uncharacterized protein {ECO:0000313|EnsemblPlants:TRIAE_CS42_2DL_TGACv1_158345_AA0516240.2};
TRINITY_DN30166_c0_g1_i1	tr|A0A1D5ZB23|A0A1D5ZB23_WHEAT	151	4.8e-82	312.4	99.6		A0A1D5ZB23_WHEAT	Uncharacterized protein	SubName: Full=Uncharacterized protein {ECO:0000313|EnsemblPlants:TRIAE_CS42_5BL_TGACv1_407135_AA1353790.1};
TRINITY_DN30166_c0_g1_i3	tr|N1QPB7|N1QPB7_AEGTA	142	1.2e-77	297.7	99.1	ORFNames=F775_02624 {ECO:0000313|EMBL:EMT00889.1};	N1QPB7_AEGTA	Lupus brain antigen 1-like protein	SubName: Full=Lupus brain antigen 1-like protein {ECO:0000313|EMBL:EMT00889.1, ECO:0000313|EnsemblPlants:EMT00889};
TRINITY_DN30166_c0_g1_i2	tr|A0A1D5U269|A0A1D5U269_WHEAT	142	1.6e-74	287.3	99.1		A0A1D5U269_WHEAT	Uncharacterized protein	SubName: Full=Uncharacterized protein {ECO:0000313|EnsemblPlants:TRIAE_CS42_2BL_TGACv1_131127_AA0422950.5};
TRINITY_DN30148_c0_g1_i8	tr|T1NCD8|T1NCD8_TRIUA	75	2.9e-27	129.4	99.1		T1NCD8_TRIUA	Uncharacterized protein	SubName: Full=Uncharacterized protein {ECO:0000313|EnsemblPlants:TRIUR3_28198-P1};
TRINITY_DN30148_c0_g1_i3	tr|T1NCD8|T1NCD8_TRIUA	73	3.4e-12	80.1	56.9		T1NCD8_TRIUA	Uncharacterized protein	SubName: Full=Uncharacterized protein {ECO:0000313|EnsemblPlants:TRIUR3_28198-P1};
TRINITY_DN30148_c0_g1_i7	tr|A0A0V0YUL6|A0A0V0YUL6_9BILA	33	5.1e-09	68.9	39	ORFNames=T12_1760 {ECO:0000313|EMBL:KRY03873.1};	A0A0V0YUL6_9BILA	Uncharacterized protein	SubName: Full=Uncharacterized protein {ECO:0000313|EMBL:KRY03873.1};
TRINITY_DN30148_c0_g1_i5	tr|A0A0V0YUL6|A0A0V0YUL6_9BILA	42	7.9e-15	89	30.1	ORFNames=T12_1760 {ECO:0000313|EMBL:KRY03873.1};	A0A0V0YUL6_9BILA	Uncharacterized protein	SubName: Full=Uncharacterized protein {ECO:0000313|EMBL:KRY03873.1};
TRINITY_DN30148_c0_g1_i1	tr|M7YSA0|M7YSA0_TRIUA	48	1.4e-11	78.2	34.4	ORFNames=TRIUR3_32998 {ECO:0000313|EMBL:EMS49951.1};	M7YSA0_TRIUA	Uncharacterized protein	SubName: Full=Uncharacterized protein {ECO:0000313|EMBL:EMS49951.1, ECO:0000313|EnsemblPlants:TRIUR3_32998-P1};
TRINITY_DN30148_c0_g1_i4	tr|T1NCD8|T1NCD8_TRIUA	82	1.5e-18	101.3	59.9		T1NCD8_TRIUA	Uncharacterized protein	SubName: Full=Uncharacterized protein {ECO:0000313|EnsemblPlants:TRIUR3_28198-P1};
TRINITY_DN30148_c0_g1_i9	tr|T1NCD8|T1NCD8_TRIUA	58	6e-20	104.8	96.7		T1NCD8_TRIUA	Uncharacterized protein	SubName: Full=Uncharacterized protein {ECO:0000313|EnsemblPlants:TRIUR3_28198-P1};
TRINITY_DN30148_c0_g1_i10	tr|A0A1D6AHQ7|A0A1D6AHQ7_WHEAT	61	4e-05	55.8	79.4		A0A1D6AHQ7_WHEAT	Uncharacterized protein	SubName: Full=Uncharacterized protein {ECO:0000313|EnsemblPlants:TRIAE_CS42_6AS_TGACv1_486701_AA1564200.1};
TRINITY_DN30148_c0_g2_i1	tr|M7YSA0|M7YSA0_TRIUA	47	8.8e-10	71.2	65.6	ORFNames=TRIUR3_32998 {ECO:0000313|EMBL:EMS49951.1};	M7YSA0_TRIUA	Uncharacterized protein	SubName: Full=Uncharacterized protein {ECO:0000313|EMBL:EMS49951.1, ECO:0000313|EnsemblPlants:TRIUR3_32998-P1};
TRINITY_DN30148_c0_g2_i2	tr|M7YSA0|M7YSA0_TRIUA	47	1.7e-09	70.5	57.6	ORFNames=TRIUR3_32998 {ECO:0000313|EMBL:EMS49951.1};	M7YSA0_TRIUA	Uncharacterized protein	SubName: Full=Uncharacterized protein {ECO:0000313|EMBL:EMS49951.1, ECO:0000313|EnsemblPlants:TRIUR3_32998-P1};
TRINITY_DN30148_c1_g2_i1	tr|M7YSA0|M7YSA0_TRIUA	42	0.00063	52	51.4	ORFNames=TRIUR3_32998 {ECO:0000313|EMBL:EMS49951.1};	M7YSA0_TRIUA	Uncharacterized protein	SubName: Full=Uncharacterized protein {ECO:0000313|EMBL:EMS49951.1, ECO:0000313|EnsemblPlants:TRIUR3_32998-P1};
TRINITY_DN30138_c0_g1_i2	tr|A0A1D5TAD8|A0A1D5TAD8_WHEAT	78	1.8e-16	93.6	100		A0A1D5TAD8_WHEAT	Serine/threonine protein phosphatase 2A regulatory subunit	RecName: Full=Serine/threonine protein phosphatase 2A regulatory subunit {ECO:0000256|PIRNR:PIRNR028043};
TRINITY_DN30138_c0_g1_i1	tr|A0A1D5TAD8|A0A1D5TAD8_WHEAT	77	5.7e-15	88.6	100		A0A1D5TAD8_WHEAT	Serine/threonine protein phosphatase 2A regulatory subunit	RecName: Full=Serine/threonine protein phosphatase 2A regulatory subunit {ECO:0000256|PIRNR:PIRNR028043};
TRINITY_DN30109_c0_g1_i1	tr|A0A1D5VW98|A0A1D5VW98_WHEAT	80	9.1e-40	171	99.2		A0A1D5VW98_WHEAT	Uncharacterized protein	SubName: Full=Uncharacterized protein {ECO:0000313|EnsemblPlants:TRIAE_CS42_3B_TGACv1_221850_AA0751680.1};
TRINITY_DN30164_c0_g1_i1	tr|T1MJI1|T1MJI1_TRIUA	46	9.7e-08	65.1	38.2		T1MJI1_TRIUA	Uncharacterized protein	SubName: Full=Uncharacterized protein {ECO:0000313|EnsemblPlants:TRIUR3_17939-P1};
TRINITY_DN30132_c0_g1_i2	tr|A0A287EKH8|A0A287EKH8_HORVV	52	3.7e-05	55.8	74.6		A0A287EKH8_HORVV	Uncharacterized protein	SubName: Full=Uncharacterized protein {ECO:0000313|EnsemblPlants:HORVU1Hr1G008230.2};
TRINITY_DN30135_c1_g1_i1	tr|W5DXD2|W5DXD2_WHEAT	35	2.7e-10	73.2	41.3		W5DXD2_WHEAT	Uncharacterized protein	SubName: Full=Uncharacterized protein {ECO:0000313|EnsemblPlants:TRIAE_CS42_4AS_TGACv1_306893_AA1014670.1};
TRINITY_DN30100_c0_g1_i7	tr|W5GDQ5|W5GDQ5_WHEAT	186	4.1e-91	342.8	99.5		W5GDQ5_WHEAT	Uncharacterized protein	SubName: Full=Uncharacterized protein {ECO:0000313|EnsemblPlants:TRIAE_CS42_6AS_TGACv1_485229_AA1540880.1};
TRINITY_DN30100_c0_g1_i4	tr|W5GDQ5|W5GDQ5_WHEAT	178	1.7e-78	300.8	99.4		W5GDQ5_WHEAT	Uncharacterized protein	SubName: Full=Uncharacterized protein {ECO:0000313|EnsemblPlants:TRIAE_CS42_6AS_TGACv1_485229_AA1540880.1};
TRINITY_DN30100_c0_g1_i3	tr|A0A1D6BCW1|A0A1D6BCW1_WHEAT	178	5.3e-88	332.4	99.4		A0A1D6BCW1_WHEAT	Uncharacterized protein	SubName: Full=Uncharacterized protein {ECO:0000313|EnsemblPlants:TRIAE_CS42_6DS_TGACv1_542725_AA1728990.1};
TRINITY_DN30100_c0_g1_i5	tr|M7YPY2|M7YPY2_TRIUA	187	4.4e-85	322.8	98.9	ORFNames=TRIUR3_04004 {ECO:0000313|EMBL:EMS52668.1};	M7YPY2_TRIUA	Disease resistance protein RPM1	SubName: Full=Disease resistance protein RPM1 {ECO:0000313|EMBL:EMS52668.1, ECO:0000313|EnsemblPlants:TRIUR3_04004-P1};
TRINITY_DN30100_c0_g1_i2	tr|A0A1D6AVS7|A0A1D6AVS7_WHEAT	178	1.2e-92	347.8	99.4		A0A1D6AVS7_WHEAT	Uncharacterized protein	SubName: Full=Uncharacterized protein {ECO:0000313|EnsemblPlants:TRIAE_CS42_6BS_TGACv1_513362_AA1639010.1};
TRINITY_DN30100_c0_g1_i6	tr|A0A1D6BCV9|A0A1D6BCV9_WHEAT	180	3.9e-83	316.2	99.4		A0A1D6BCV9_WHEAT	Uncharacterized protein	SubName: Full=Uncharacterized protein {ECO:0000313|EnsemblPlants:TRIAE_CS42_6DS_TGACv1_542725_AA1728930.3};
TRINITY_DN30100_c0_g1_i1	tr|A0A1D6AVS7|A0A1D6AVS7_WHEAT	178	3e-72	280	99.4		A0A1D6AVS7_WHEAT	Uncharacterized protein	SubName: Full=Uncharacterized protein {ECO:0000313|EnsemblPlants:TRIAE_CS42_6BS_TGACv1_513362_AA1639010.1};
TRINITY_DN30172_c0_g1_i2	tr|M7ZXC9|M7ZXC9_TRIUA	278	2.9e-142	513.8	69.2	ORFNames=TRIUR3_07587 {ECO:0000313|EMBL:EMS64722.1};	M7ZXC9_TRIUA	Mitochondrial metalloendopeptidase OMA1	SubName: Full=Mitochondrial metalloendopeptidase OMA1 {ECO:0000313|EMBL:EMS64722.1, ECO:0000313|EnsemblPlants:TRIUR3_07587-P1};
TRINITY_DN30172_c0_g1_i3	tr|M7ZXC9|M7ZXC9_TRIUA	146	4.8e-66	260.8	32.7	ORFNames=TRIUR3_07587 {ECO:0000313|EMBL:EMS64722.1};	M7ZXC9_TRIUA	Mitochondrial metalloendopeptidase OMA1	SubName: Full=Mitochondrial metalloendopeptidase OMA1 {ECO:0000313|EMBL:EMS64722.1, ECO:0000313|EnsemblPlants:TRIUR3_07587-P1};
TRINITY_DN30172_c0_g1_i1	tr|M7ZXC9|M7ZXC9_TRIUA	146	5.3e-66	260.8	30	ORFNames=TRIUR3_07587 {ECO:0000313|EMBL:EMS64722.1};	M7ZXC9_TRIUA	Mitochondrial metalloendopeptidase OMA1	SubName: Full=Mitochondrial metalloendopeptidase OMA1 {ECO:0000313|EMBL:EMS64722.1, ECO:0000313|EnsemblPlants:TRIUR3_07587-P1};
TRINITY_DN30172_c0_g2_i1	tr|A0A1D6D1Q3|A0A1D6D1Q3_WHEAT	32	1.5e-06	60.8	34.2	Name=PFP-BETA {ECO:0000256|HAMAP-Rule:MF_03185};	A0A1D6D1Q3_WHEAT	Pyrophosphate--fructose 6-phosphate 1-phosphotransferase subunit beta; PFP; 6-phosphofructokinase, pyrophosphate dependent; PPi-PFK; Pyrophosphate-dependent 6-phosphofructose-1-kinase	RecName: Full=Pyrophosphate--fructose 6-phosphate 1-phosphotransferase subunit beta {ECO:0000256|HAMAP-Rule:MF_03185}; Short=PFP {ECO:0000256|HAMAP-Rule:MF_03185}; EC=2.7.1.90 {ECO:0000256|HAMAP-Rule:MF_03185}; AltName: Full=6-phosphofructokinase, pyrophosphate dependent {ECO:0000256|HAMAP-Rule:MF_03185}; AltName: Full=PPi-PFK {ECO:0000256|HAMAP-Rule:MF_03185}; AltName: Full=Pyrophosphate-depende…
TRINITY_DN30172_c1_g2_i3	tr|T1M8E9|T1M8E9_TRIUA	183	1.6e-89	338.2	63.5		T1M8E9_TRIUA	Uncharacterized protein	SubName: Full=Uncharacterized protein {ECO:0000313|EnsemblPlants:TRIUR3_13833-P1};
TRINITY_DN30172_c1_g2_i5	tr|A0A1D5YJ46|A0A1D5YJ46_WHEAT	38	2.4e-08	67	36		A0A1D5YJ46_WHEAT	Uncharacterized protein	SubName: Full=Uncharacterized protein {ECO:0000313|EnsemblPlants:TRIAE_CS42_5AL_TGACv1_375474_AA1222420.1};
TRINITY_DN30172_c1_g2_i6	tr|A0A1D6BS21|A0A1D6BS21_WHEAT	126	3.3e-23	119	19.6		A0A1D6BS21_WHEAT	Uncharacterized protein	SubName: Full=Uncharacterized protein {ECO:0000313|EnsemblPlants:TRIAE_CS42_7AL_TGACv1_562070_AA1803450.1};
TRINITY_DN30119_c1_g1_i8	tr|A0A1D6AZX0|A0A1D6AZX0_WHEAT	157	2.6e-78	300.1	99.8		A0A1D6AZX0_WHEAT	Uncharacterized protein	SubName: Full=Uncharacterized protein {ECO:0000313|EnsemblPlants:TRIAE_CS42_6BS_TGACv1_514673_AA1663080.1};
TRINITY_DN30119_c1_g1_i2	tr|A0A1D6AZX0|A0A1D6AZX0_WHEAT	84	3.5e-35	156.8	53.6		A0A1D6AZX0_WHEAT	Uncharacterized protein	SubName: Full=Uncharacterized protein {ECO:0000313|EnsemblPlants:TRIAE_CS42_6BS_TGACv1_514673_AA1663080.1};
TRINITY_DN30119_c1_g1_i10	tr|A0A1D6AZX0|A0A1D6AZX0_WHEAT	113	6.4e-55	221.9	99.1		A0A1D6AZX0_WHEAT	Uncharacterized protein	SubName: Full=Uncharacterized protein {ECO:0000313|EnsemblPlants:TRIAE_CS42_6BS_TGACv1_514673_AA1663080.1};
TRINITY_DN30119_c1_g1_i6	tr|A0A1D6AZX0|A0A1D6AZX0_WHEAT	157	3e-79	303.1	99.8		A0A1D6AZX0_WHEAT	Uncharacterized protein	SubName: Full=Uncharacterized protein {ECO:0000313|EnsemblPlants:TRIAE_CS42_6BS_TGACv1_514673_AA1663080.1};
TRINITY_DN30119_c1_g1_i7	tr|A0A1D6AZX0|A0A1D6AZX0_WHEAT	127	2.7e-62	246.5	99.2		A0A1D6AZX0_WHEAT	Uncharacterized protein	SubName: Full=Uncharacterized protein {ECO:0000313|EnsemblPlants:TRIAE_CS42_6BS_TGACv1_514673_AA1663080.1};
TRINITY_DN30119_c1_g1_i1	tr|A0A1D6SDT0|A0A1D6SDT0_WHEAT	67	1.1e-27	130.6	99		A0A1D6SDT0_WHEAT	Uncharacterized protein	SubName: Full=Uncharacterized protein {ECO:0000313|EnsemblPlants:TRIAE_CS42_7BL_TGACv1_579829_AA1910390.1};
TRINITY_DN30119_c1_g1_i5	tr|A0A1D6AZX0|A0A1D6AZX0_WHEAT	100	3.1e-47	196.4	81.7		A0A1D6AZX0_WHEAT	Uncharacterized protein	SubName: Full=Uncharacterized protein {ECO:0000313|EnsemblPlants:TRIAE_CS42_6BS_TGACv1_514673_AA1663080.1};
TRINITY_DN30119_c1_g1_i3	tr|A0A1D6AZX0|A0A1D6AZX0_WHEAT	127	5.2e-61	242.3	99.2		A0A1D6AZX0_WHEAT	Uncharacterized protein	SubName: Full=Uncharacterized protein {ECO:0000313|EnsemblPlants:TRIAE_CS42_6BS_TGACv1_514673_AA1663080.1};
TRINITY_DN30119_c1_g1_i9	tr|A0A1D6AZX0|A0A1D6AZX0_WHEAT	153	9.5e-78	298.1	99.8		A0A1D6AZX0_WHEAT	Uncharacterized protein	SubName: Full=Uncharacterized protein {ECO:0000313|EnsemblPlants:TRIAE_CS42_6BS_TGACv1_514673_AA1663080.1};
TRINITY_DN30119_c1_g1_i11	tr|A0A1D6SDT0|A0A1D6SDT0_WHEAT	62	7e-26	125.6	48.6		A0A1D6SDT0_WHEAT	Uncharacterized protein	SubName: Full=Uncharacterized protein {ECO:0000313|EnsemblPlants:TRIAE_CS42_7BL_TGACv1_579829_AA1910390.1};
TRINITY_DN30119_c1_g1_i4	tr|A0A1D6AZX0|A0A1D6AZX0_WHEAT	157	9.1e-76	291.6	99.8		A0A1D6AZX0_WHEAT	Uncharacterized protein	SubName: Full=Uncharacterized protein {ECO:0000313|EnsemblPlants:TRIAE_CS42_6BS_TGACv1_514673_AA1663080.1};
TRINITY_DN30119_c1_g2_i1	tr|A0A1D6SDT0|A0A1D6SDT0_WHEAT	83	2.6e-31	143.3	80.3		A0A1D6SDT0_WHEAT	Uncharacterized protein	SubName: Full=Uncharacterized protein {ECO:0000313|EnsemblPlants:TRIAE_CS42_7BL_TGACv1_579829_AA1910390.1};
TRINITY_DN30182_c0_g1_i6	tr|W5B955|W5B955_WHEAT	328	4.2e-165	589.7	79.9		W5B955_WHEAT	Uncharacterized protein	SubName: Full=Uncharacterized protein {ECO:0000313|EnsemblPlants:TRIAE_CS42_2BL_TGACv1_129364_AA0380440.1};
TRINITY_DN30182_c0_g1_i2	tr|A0A1D5TH76|A0A1D5TH76_WHEAT	329	4.7e-178	633.3	56.3		A0A1D5TH76_WHEAT	Uncharacterized protein	SubName: Full=Uncharacterized protein {ECO:0000313|EnsemblPlants:TRIAE_CS42_2AL_TGACv1_096928_AA0322130.1};
TRINITY_DN30182_c0_g1_i5	tr|A0A1D5TH76|A0A1D5TH76_WHEAT	329	2.2e-180	641	57.4		A0A1D5TH76_WHEAT	Uncharacterized protein	SubName: Full=Uncharacterized protein {ECO:0000313|EnsemblPlants:TRIAE_CS42_2AL_TGACv1_096928_AA0322130.1};
TRINITY_DN30182_c0_g1_i3	tr|A0A1D5TH76|A0A1D5TH76_WHEAT	329	2.3e-177	630.9	57.3		A0A1D5TH76_WHEAT	Uncharacterized protein	SubName: Full=Uncharacterized protein {ECO:0000313|EnsemblPlants:TRIAE_CS42_2AL_TGACv1_096928_AA0322130.1};
TRINITY_DN30182_c0_g1_i4	tr|A0A1D5TH76|A0A1D5TH76_WHEAT	329	2.1e-180	641	59.7		A0A1D5TH76_WHEAT	Uncharacterized protein	SubName: Full=Uncharacterized protein {ECO:0000313|EnsemblPlants:TRIAE_CS42_2AL_TGACv1_096928_AA0322130.1};
TRINITY_DN30104_c0_g1_i1	sp|Q1W374|PMM_WHEAT	185	1.8e-102	380.6	99.8		PMM_WHEAT	Phosphomannomutase; TaPMM	RecName: Full=Phosphomannomutase; EC=5.4.2.8; AltName: Full=TaPMM;
TRINITY_DN30104_c0_g1_i3	tr|M7ZUG7|M7ZUG7_TRIUA	173	1.6e-81	311.2	69.1	ORFNames=TRIUR3_00236 {ECO:0000313|EMBL:EMS63767.1};	M7ZUG7_TRIUA	Phosphomannomutase	RecName: Full=Phosphomannomutase {ECO:0000256|RuleBase:RU361118}; EC=5.4.2.8 {ECO:0000256|RuleBase:RU361118};
TRINITY_DN30104_c0_g1_i5	tr|A0A1D5WZC5|A0A1D5WZC5_WHEAT	108	4.7e-55	222.2	100		A0A1D5WZC5_WHEAT	Phosphomannomutase	RecName: Full=Phosphomannomutase {ECO:0000256|RuleBase:RU361118}; EC=5.4.2.8 {ECO:0000256|RuleBase:RU361118};
TRINITY_DN30104_c0_g1_i2	tr|A0A1D5WZC5|A0A1D5WZC5_WHEAT	185	6.5e-105	388.7	99.8		A0A1D5WZC5_WHEAT	Phosphomannomutase	RecName: Full=Phosphomannomutase {ECO:0000256|RuleBase:RU361118}; EC=5.4.2.8 {ECO:0000256|RuleBase:RU361118};
TRINITY_DN30104_c0_g2_i1	tr|A0A287EXL2|A0A287EXL2_HORVV	86	1e-23	118.2	71.9		A0A287EXL2_HORVV	Phosphomannomutase	RecName: Full=Phosphomannomutase {ECO:0000256|RuleBase:RU361118}; EC=5.4.2.8 {ECO:0000256|RuleBase:RU361118};
TRINITY_DN30104_c0_g3_i1	tr|M7ZUG7|M7ZUG7_TRIUA	52	1e-15	91.7	45.2	ORFNames=TRIUR3_00236 {ECO:0000313|EMBL:EMS63767.1};	M7ZUG7_TRIUA	Phosphomannomutase	RecName: Full=Phosphomannomutase {ECO:0000256|RuleBase:RU361118}; EC=5.4.2.8 {ECO:0000256|RuleBase:RU361118};
TRINITY_DN30104_c0_g4_i1	tr|A0A287PF19|A0A287PF19_HORVV	34	2.3e-07	63.9	29.6		A0A287PF19_HORVV	Phosphomannomutase	RecName: Full=Phosphomannomutase {ECO:0000256|RuleBase:RU361118}; EC=5.4.2.8 {ECO:0000256|RuleBase:RU361118};
TRINITY_DN30104_c1_g1_i1	tr|R7W0P7|R7W0P7_AEGTA	84	2.4e-38	166.8	74.6	ORFNames=F775_11250 {ECO:0000313|EMBL:EMT03259.1};	R7W0P7_AEGTA	Phosphomannomutase	RecName: Full=Phosphomannomutase {ECO:0000256|RuleBase:RU361118}; EC=5.4.2.8 {ECO:0000256|RuleBase:RU361118};
TRINITY_DN30104_c2_g1_i1	tr|A0A0P1B798|A0A0P1B798_9STRA	67	3e-18	99.4	92.6		A0A0P1B798_9STRA	Phosphomannomutase	RecName: Full=Phosphomannomutase {ECO:0000256|RuleBase:RU361118}; EC=5.4.2.8 {ECO:0000256|RuleBase:RU361118};
TRINITY_DN30110_c0_g1_i2	tr|M8BPF9|M8BPF9_AEGTA	30	3.7e-05	57	19.4	ORFNames=F775_14621 {ECO:0000313|EMBL:EMT26900.1};	M8BPF9_AEGTA	Uncharacterized protein	SubName: Full=Uncharacterized protein {ECO:0000313|EMBL:EMT26900.1, ECO:0000313|EnsemblPlants:EMT26900};
TRINITY_DN30121_c0_g1_i3	tr|M7ZCL8|M7ZCL8_TRIUA	1616	0	2554.2	97.8	ORFNames=TRIUR3_33277 {ECO:0000313|EMBL:EMS50140.1};	M7ZCL8_TRIUA	Uncharacterized protein	SubName: Full=Uncharacterized protein {ECO:0000313|EMBL:EMS50140.1, ECO:0000313|EnsemblPlants:TRIUR3_33277-P1};
TRINITY_DN30121_c0_g1_i6	tr|M7ZCL8|M7ZCL8_TRIUA	1731	0	2781.5	92.4	ORFNames=TRIUR3_33277 {ECO:0000313|EMBL:EMS50140.1};	M7ZCL8_TRIUA	Uncharacterized protein	SubName: Full=Uncharacterized protein {ECO:0000313|EMBL:EMS50140.1, ECO:0000313|EnsemblPlants:TRIUR3_33277-P1};
TRINITY_DN30121_c0_g1_i7	tr|M7ZCL8|M7ZCL8_TRIUA	1616	0	2556.2	97.8	ORFNames=TRIUR3_33277 {ECO:0000313|EMBL:EMS50140.1};	M7ZCL8_TRIUA	Uncharacterized protein	SubName: Full=Uncharacterized protein {ECO:0000313|EMBL:EMS50140.1, ECO:0000313|EnsemblPlants:TRIUR3_33277-P1};
TRINITY_DN30121_c0_g1_i4	tr|M7ZCL8|M7ZCL8_TRIUA	1731	0	2780.7	92.4	ORFNames=TRIUR3_33277 {ECO:0000313|EMBL:EMS50140.1};	M7ZCL8_TRIUA	Uncharacterized protein	SubName: Full=Uncharacterized protein {ECO:0000313|EMBL:EMS50140.1, ECO:0000313|EnsemblPlants:TRIUR3_33277-P1};
TRINITY_DN30121_c0_g1_i8	tr|M7ZCL8|M7ZCL8_TRIUA	820	0	1255	96	ORFNames=TRIUR3_33277 {ECO:0000313|EMBL:EMS50140.1};	M7ZCL8_TRIUA	Uncharacterized protein	SubName: Full=Uncharacterized protein {ECO:0000313|EMBL:EMS50140.1, ECO:0000313|EnsemblPlants:TRIUR3_33277-P1};
TRINITY_DN30187_c0_g1_i2	tr|A0A1D5WA30|A0A1D5WA30_WHEAT	177	1.2e-71	278.5	73.4		A0A1D5WA30_WHEAT	Uncharacterized protein	SubName: Full=Uncharacterized protein {ECO:0000313|EnsemblPlants:TRIAE_CS42_3B_TGACv1_226769_AA0819320.1};
TRINITY_DN30187_c0_g1_i4	tr|A0A077RFQ3|A0A077RFQ3_WHEAT	167	7.9e-67	262.7	60.8	ORFNames=TRAES_3BF275700010CFD_c1 {ECO:0000313|EMBL:CDJ26684.1};	A0A077RFQ3_WHEAT	Uncharacterized protein	SubName: Full=Uncharacterized protein {ECO:0000313|EMBL:CDJ26684.1, ECO:0000313|EnsemblPlants:TRIAE_CS42_3B_TGACv1_226769_AA0819320.2};
TRINITY_DN30187_c0_g1_i1	tr|A0A077RFQ3|A0A077RFQ3_WHEAT	167	7.6e-67	262.7	62.9	ORFNames=TRAES_3BF275700010CFD_c1 {ECO:0000313|EMBL:CDJ26684.1};	A0A077RFQ3_WHEAT	Uncharacterized protein	SubName: Full=Uncharacterized protein {ECO:0000313|EMBL:CDJ26684.1, ECO:0000313|EnsemblPlants:TRIAE_CS42_3B_TGACv1_226769_AA0819320.2};
TRINITY_DN30187_c0_g1_i3	tr|A0A287KQA9|A0A287KQA9_HORVV	189	8.4e-71	275.8	73.6		A0A287KQA9_HORVV	Uncharacterized protein	SubName: Full=Uncharacterized protein {ECO:0000313|EnsemblPlants:HORVU3Hr1G034110.1};
TRINITY_DN30187_c0_g2_i1	tr|M8ASW5|M8ASW5_TRIUA	101	6.9e-32	145.2	97.7	ORFNames=TRIUR3_17201 {ECO:0000313|EMBL:EMS68305.1};	M8ASW5_TRIUA	Uncharacterized protein	SubName: Full=Uncharacterized protein {ECO:0000313|EMBL:EMS68305.1, ECO:0000313|EnsemblPlants:TRIUR3_17201-P1};
TRINITY_DN30197_c0_g1_i2	tr|M7YL83|M7YL83_TRIUA	575	1.9e-300	1040	86.9	ORFNames=TRIUR3_27868 {ECO:0000313|EMBL:EMS47636.1};	M7YL83_TRIUA	F-box only protein 7	SubName: Full=F-box only protein 7 {ECO:0000313|EMBL:EMS47636.1, ECO:0000313|EnsemblPlants:TRIUR3_27868-P1};
TRINITY_DN30197_c0_g1_i1	tr|A0A1D6BUW6|A0A1D6BUW6_WHEAT	497	8e-275	954.9	75.8		A0A1D6BUW6_WHEAT	Uncharacterized protein	SubName: Full=Uncharacterized protein {ECO:0000313|EnsemblPlants:TRIAE_CS42_7AS_TGACv1_569653_AA1821200.1};
TRINITY_DN30197_c0_g1_i4	tr|M7YL83|M7YL83_TRIUA	575	0	1142.1	84.4	ORFNames=TRIUR3_27868 {ECO:0000313|EMBL:EMS47636.1};	M7YL83_TRIUA	F-box only protein 7	SubName: Full=F-box only protein 7 {ECO:0000313|EMBL:EMS47636.1, ECO:0000313|EnsemblPlants:TRIUR3_27868-P1};
TRINITY_DN30197_c0_g1_i6	tr|A0A1D6BUW6|A0A1D6BUW6_WHEAT	433	3.4e-229	803.1	76.5		A0A1D6BUW6_WHEAT	Uncharacterized protein	SubName: Full=Uncharacterized protein {ECO:0000313|EnsemblPlants:TRIAE_CS42_7AS_TGACv1_569653_AA1821200.1};
TRINITY_DN30197_c0_g1_i3	tr|M7YL83|M7YL83_TRIUA	561	3.9e-285	989.2	81.4	ORFNames=TRIUR3_27868 {ECO:0000313|EMBL:EMS47636.1};	M7YL83_TRIUA	F-box only protein 7	SubName: Full=F-box only protein 7 {ECO:0000313|EMBL:EMS47636.1, ECO:0000313|EnsemblPlants:TRIUR3_27868-P1};
TRINITY_DN30197_c0_g1_i5	tr|A0A1D6D0Y6|A0A1D6D0Y6_WHEAT	184	1.9e-85	323.9	99.8		A0A1D6D0Y6_WHEAT	Uncharacterized protein	SubName: Full=Uncharacterized protein {ECO:0000313|EnsemblPlants:TRIAE_CS42_7DS_TGACv1_622529_AA2041320.1};
TRINITY_DN30153_c0_g1_i5	tr|A0A0P0WUT7|A0A0P0WUT7_ORYSJ	38	1.7e-06	62.8	9.5	Name=Os06g0259000 {ECO:0000313|EMBL:BAS97116.1}; ORFNames=OSNPB_060259000 {ECO:0000313|EMBL:BAS97116.1};	A0A0P0WUT7_ORYSJ	Os06g0259000 protein	SubName: Full=Os06g0259000 protein {ECO:0000313|EMBL:BAS97116.1}; Flags: Fragment;
TRINITY_DN30153_c0_g1_i11	tr|A0A0P0WUT7|A0A0P0WUT7_ORYSJ	35	3.9e-05	57.8	12.6	Name=Os06g0259000 {ECO:0000313|EMBL:BAS97116.1}; ORFNames=OSNPB_060259000 {ECO:0000313|EMBL:BAS97116.1};	A0A0P0WUT7_ORYSJ	Os06g0259000 protein	SubName: Full=Os06g0259000 protein {ECO:0000313|EMBL:BAS97116.1}; Flags: Fragment;
TRINITY_DN30153_c0_g1_i9	tr|A0A0P0WUT7|A0A0P0WUT7_ORYSJ	35	5.4e-05	57.8	9.1	Name=Os06g0259000 {ECO:0000313|EMBL:BAS97116.1}; ORFNames=OSNPB_060259000 {ECO:0000313|EMBL:BAS97116.1};	A0A0P0WUT7_ORYSJ	Os06g0259000 protein	SubName: Full=Os06g0259000 protein {ECO:0000313|EMBL:BAS97116.1}; Flags: Fragment;
TRINITY_DN30153_c0_g1_i6	tr|A0A0P0WUT7|A0A0P0WUT7_ORYSJ	38	1.8e-06	62.8	9.4	Name=Os06g0259000 {ECO:0000313|EMBL:BAS97116.1}; ORFNames=OSNPB_060259000 {ECO:0000313|EMBL:BAS97116.1};	A0A0P0WUT7_ORYSJ	Os06g0259000 protein	SubName: Full=Os06g0259000 protein {ECO:0000313|EMBL:BAS97116.1}; Flags: Fragment;
TRINITY_DN30153_c0_g1_i3	tr|A0A0P0WUT7|A0A0P0WUT7_ORYSJ	35	5.6e-05	57.8	8.8	Name=Os06g0259000 {ECO:0000313|EMBL:BAS97116.1}; ORFNames=OSNPB_060259000 {ECO:0000313|EMBL:BAS97116.1};	A0A0P0WUT7_ORYSJ	Os06g0259000 protein	SubName: Full=Os06g0259000 protein {ECO:0000313|EMBL:BAS97116.1}; Flags: Fragment;
TRINITY_DN30153_c0_g1_i4	tr|A0A0P0WUT7|A0A0P0WUT7_ORYSJ	35	5.4e-05	57.8	9.1	Name=Os06g0259000 {ECO:0000313|EMBL:BAS97116.1}; ORFNames=OSNPB_060259000 {ECO:0000313|EMBL:BAS97116.1};	A0A0P0WUT7_ORYSJ	Os06g0259000 protein	SubName: Full=Os06g0259000 protein {ECO:0000313|EMBL:BAS97116.1}; Flags: Fragment;
TRINITY_DN30142_c0_g1_i4	tr|A0A1D5UCZ7|A0A1D5UCZ7_WHEAT	154	9.1e-47	195.7	72.9		A0A1D5UCZ7_WHEAT	Uncharacterized protein	SubName: Full=Uncharacterized protein {ECO:0000313|EnsemblPlants:TRIAE_CS42_2BS_TGACv1_147297_AA0481380.1};
TRINITY_DN30142_c0_g1_i5	tr|A0A1D5UCZ7|A0A1D5UCZ7_WHEAT	154	9.1e-47	195.7	73.2		A0A1D5UCZ7_WHEAT	Uncharacterized protein	SubName: Full=Uncharacterized protein {ECO:0000313|EnsemblPlants:TRIAE_CS42_2BS_TGACv1_147297_AA0481380.1};
TRINITY_DN30142_c0_g1_i2	tr|A0A1D6S9X9|A0A1D6S9X9_WHEAT	42	3.8e-14	85.9	53.4		A0A1D6S9X9_WHEAT	Uncharacterized protein	SubName: Full=Uncharacterized protein {ECO:0000313|EnsemblPlants:TRIAE_CS42_6BL_TGACv1_503611_AA1628180.1};
TRINITY_DN30142_c0_g2_i1	tr|A0A1D5UCZ7|A0A1D5UCZ7_WHEAT	71	0.00042	52.4	99.1		A0A1D5UCZ7_WHEAT	Uncharacterized protein	SubName: Full=Uncharacterized protein {ECO:0000313|EnsemblPlants:TRIAE_CS42_2BS_TGACv1_147297_AA0481380.1};
TRINITY_DN30156_c0_g1_i1	tr|A0A1D5WTZ0|A0A1D5WTZ0_WHEAT	34	1.5e-08	68.2	24.2		A0A1D5WTZ0_WHEAT	Uncharacterized protein	SubName: Full=Uncharacterized protein {ECO:0000313|EnsemblPlants:TRIAE_CS42_3DS_TGACv1_272354_AA0919430.1};
TRINITY_DN30156_c0_g1_i7	tr|A0A1D5WTZ0|A0A1D5WTZ0_WHEAT	34	1.5e-08	68.2	23.3		A0A1D5WTZ0_WHEAT	Uncharacterized protein	SubName: Full=Uncharacterized protein {ECO:0000313|EnsemblPlants:TRIAE_CS42_3DS_TGACv1_272354_AA0919430.1};
TRINITY_DN30156_c0_g1_i9	tr|A0A1D5WTZ0|A0A1D5WTZ0_WHEAT	34	1.5e-08	68.6	17.6		A0A1D5WTZ0_WHEAT	Uncharacterized protein	SubName: Full=Uncharacterized protein {ECO:0000313|EnsemblPlants:TRIAE_CS42_3DS_TGACv1_272354_AA0919430.1};
TRINITY_DN30156_c0_g1_i5	tr|A0A1D5WTZ0|A0A1D5WTZ0_WHEAT	34	7.5e-09	68.6	36		A0A1D5WTZ0_WHEAT	Uncharacterized protein	SubName: Full=Uncharacterized protein {ECO:0000313|EnsemblPlants:TRIAE_CS42_3DS_TGACv1_272354_AA0919430.1};
TRINITY_DN30156_c0_g1_i8	tr|A0A1D5WTZ0|A0A1D5WTZ0_WHEAT	34	9.7e-09	68.2	36.4		A0A1D5WTZ0_WHEAT	Uncharacterized protein	SubName: Full=Uncharacterized protein {ECO:0000313|EnsemblPlants:TRIAE_CS42_3DS_TGACv1_272354_AA0919430.1};
TRINITY_DN30175_c0_g1_i1	tr|A0A1D5U028|A0A1D5U028_WHEAT	115	3.2e-57	229.9	75		A0A1D5U028_WHEAT	Uncharacterized protein	SubName: Full=Uncharacterized protein {ECO:0000313|EnsemblPlants:TRIAE_CS42_2BL_TGACv1_130522_AA0412790.5};
TRINITY_DN30175_c0_g1_i2	tr|A0A1D5Y096|A0A1D5Y096_WHEAT	84	1.3e-37	164.1	87.5		A0A1D5Y096_WHEAT	Uncharacterized protein	SubName: Full=Uncharacterized protein {ECO:0000313|EnsemblPlants:TRIAE_CS42_4DL_TGACv1_343476_AA1134980.1};
TRINITY_DN30191_c0_g1_i1	tr|W5E469|W5E469_WHEAT	72	8.5e-37	161	99.5		W5E469_WHEAT	Uncharacterized protein	SubName: Full=Uncharacterized protein {ECO:0000313|EnsemblPlants:TRIAE_CS42_4BL_TGACv1_321082_AA1054980.2};
TRINITY_DN30131_c0_g1_i5	tr|M8AZZ1|M8AZZ1_AEGTA	53	1.3e-07	64.3	60.2	ORFNames=F775_23940 {ECO:0000313|EMBL:EMT10077.1};	M8AZZ1_AEGTA	Uncharacterized protein	SubName: Full=Uncharacterized protein {ECO:0000313|EMBL:EMT10077.1, ECO:0000313|EnsemblPlants:EMT10077};
TRINITY_DN30131_c0_g1_i4	tr|F2DCZ3|F2DCZ3_HORVV	201	3.3e-33	150.6	87.4		F2DCZ3_HORVV	Predicted protein	SubName: Full=Predicted protein {ECO:0000313|EMBL:BAJ92964.1}; Flags: Fragment;
TRINITY_DN30131_c0_g1_i8	tr|K3XMD1|K3XMD1_SETIT	68	1.8e-22	114	57.7	Name=LOC101753288 {ECO:0000313|EnsemblPlants:Si003054m}; ORFNames=SETIT_002869mg {ECO:0000313|EMBL:KQL08652.1};	K3XMD1_SETIT	Uncharacterized protein	SubName: Full=Uncharacterized protein {ECO:0000313|EMBL:KQL08652.1, ECO:0000313|EnsemblPlants:Si003054m};
TRINITY_DN30131_c0_g1_i7	tr|A0A287T7U2|A0A287T7U2_HORVV	126	1.2e-28	135.2	63.7		A0A287T7U2_HORVV	Uncharacterized protein	SubName: Full=Uncharacterized protein {ECO:0000313|EnsemblPlants:HORVU6Hr1G005920.7};
TRINITY_DN30131_c0_g1_i11	tr|N1QZN9|N1QZN9_AEGTA	123	2.2e-65	257.7	52.3	ORFNames=F775_08793 {ECO:0000313|EMBL:EMT17649.1};	N1QZN9_AEGTA	Uncharacterized protein	SubName: Full=Uncharacterized protein {ECO:0000313|EMBL:EMT17649.1, ECO:0000313|EnsemblPlants:EMT17649};
TRINITY_DN30131_c0_g1_i12	tr|N1QZN9|N1QZN9_AEGTA	214	1.7e-61	245.4	59.3	ORFNames=F775_08793 {ECO:0000313|EMBL:EMT17649.1};	N1QZN9_AEGTA	Uncharacterized protein	SubName: Full=Uncharacterized protein {ECO:0000313|EMBL:EMT17649.1, ECO:0000313|EnsemblPlants:EMT17649};
TRINITY_DN30131_c0_g1_i2	tr|A0A1D5WMW1|A0A1D5WMW1_WHEAT	126	5.3e-67	263.1	52.5		A0A1D5WMW1_WHEAT	Uncharacterized protein	SubName: Full=Uncharacterized protein {ECO:0000313|EnsemblPlants:TRIAE_CS42_3DL_TGACv1_251896_AA0885840.2};
TRINITY_DN30131_c0_g1_i6	tr|N1QZN9|N1QZN9_AEGTA	114	2e-58	235.3	28.6	ORFNames=F775_08793 {ECO:0000313|EMBL:EMT17649.1};	N1QZN9_AEGTA	Uncharacterized protein	SubName: Full=Uncharacterized protein {ECO:0000313|EMBL:EMT17649.1, ECO:0000313|EnsemblPlants:EMT17649};
TRINITY_DN30131_c0_g1_i1	tr|A0A1D5WMW1|A0A1D5WMW1_WHEAT	217	5.4e-63	250.4	59.3		A0A1D5WMW1_WHEAT	Uncharacterized protein	SubName: Full=Uncharacterized protein {ECO:0000313|EnsemblPlants:TRIAE_CS42_3DL_TGACv1_251896_AA0885840.2};
TRINITY_DN30131_c0_g1_i10	tr|A0A1D5WMW1|A0A1D5WMW1_WHEAT	117	4.7e-60	240.7	29		A0A1D5WMW1_WHEAT	Uncharacterized protein	SubName: Full=Uncharacterized protein {ECO:0000313|EnsemblPlants:TRIAE_CS42_3DL_TGACv1_251896_AA0885840.2};
TRINITY_DN30131_c0_g2_i1	tr|A0A287T833|A0A287T833_HORVV	56	3.1e-12	79.3	80.8		A0A287T833_HORVV	Uncharacterized protein	SubName: Full=Uncharacterized protein {ECO:0000313|EnsemblPlants:HORVU6Hr1G005920.8};
TRINITY_DN30131_c0_g3_i1	tr|A0A1D6AZE1|A0A1D6AZE1_WHEAT	84	1.5e-41	177.2	89		A0A1D6AZE1_WHEAT	Uncharacterized protein	SubName: Full=Uncharacterized protein {ECO:0000313|EnsemblPlants:TRIAE_CS42_6BS_TGACv1_514475_AA1660280.1};
TRINITY_DN30102_c0_g1_i1	tr|A0A1D5VUG7|A0A1D5VUG7_WHEAT	129	9e-53	214.9	99.2		A0A1D5VUG7_WHEAT	Uncharacterized protein	SubName: Full=Uncharacterized protein {ECO:0000313|EnsemblPlants:TRIAE_CS42_3B_TGACv1_221515_AA0742540.1};
TRINITY_DN30102_c0_g1_i2	tr|M8A1D4|M8A1D4_TRIUA	118	3.7e-61	242.7	99.2	ORFNames=TRIUR3_07345 {ECO:0000313|EMBL:EMS54189.1};	M8A1D4_TRIUA	Disease resistance protein RPP13	SubName: Full=Disease resistance protein RPP13 {ECO:0000313|EMBL:EMS54189.1, ECO:0000313|EnsemblPlants:TRIUR3_07345-P1};
TRINITY_DN30102_c0_g2_i1	tr|M0UEV6|M0UEV6_HORVV	97	9.7e-43	182.2	49.7		M0UEV6_HORVV	Uncharacterized protein	SubName: Full=Uncharacterized protein {ECO:0000313|EnsemblPlants:HORVU3Hr1G111470.3};
TRINITY_DN30102_c0_g3_i1	tr|M8B6R0|M8B6R0_AEGTA	83	1.7e-36	160.2	99.6	ORFNames=F775_14243 {ECO:0000313|EMBL:EMT12447.1};	M8B6R0_AEGTA	Disease resistance protein RPM1	SubName: Full=Disease resistance protein RPM1 {ECO:0000313|EMBL:EMT12447.1, ECO:0000313|EnsemblPlants:EMT12447};
TRINITY_DN30193_c0_g1_i6	tr|A0A1D5YMU1|A0A1D5YMU1_WHEAT	256	5.8e-135	489.6	63.6		A0A1D5YMU1_WHEAT	Uncharacterized protein	SubName: Full=Uncharacterized protein {ECO:0000313|EnsemblPlants:TRIAE_CS42_5AL_TGACv1_376565_AA1238540.1};
TRINITY_DN30193_c0_g1_i1	tr|A0A1D5YMU1|A0A1D5YMU1_WHEAT	147	3.1e-72	280.8	48.5		A0A1D5YMU1_WHEAT	Uncharacterized protein	SubName: Full=Uncharacterized protein {ECO:0000313|EnsemblPlants:TRIAE_CS42_5AL_TGACv1_376565_AA1238540.1};
TRINITY_DN30193_c0_g1_i8	tr|A0A1D5YMU1|A0A1D5YMU1_WHEAT	256	7.1e-135	489.6	52.1		A0A1D5YMU1_WHEAT	Uncharacterized protein	SubName: Full=Uncharacterized protein {ECO:0000313|EnsemblPlants:TRIAE_CS42_5AL_TGACv1_376565_AA1238540.1};
TRINITY_DN30193_c0_g1_i2	tr|A0A1D5YMU1|A0A1D5YMU1_WHEAT	256	7.9e-139	502.3	69.8		A0A1D5YMU1_WHEAT	Uncharacterized protein	SubName: Full=Uncharacterized protein {ECO:0000313|EnsemblPlants:TRIAE_CS42_5AL_TGACv1_376565_AA1238540.1};
TRINITY_DN30193_c0_g1_i14	tr|A0A1D5YMU1|A0A1D5YMU1_WHEAT	147	2.7e-72	280.8	56.1		A0A1D5YMU1_WHEAT	Uncharacterized protein	SubName: Full=Uncharacterized protein {ECO:0000313|EnsemblPlants:TRIAE_CS42_5AL_TGACv1_376565_AA1238540.1};
TRINITY_DN30193_c0_g1_i13	tr|A0A1D5YMU1|A0A1D5YMU1_WHEAT	256	6.5e-135	489.6	57.4		A0A1D5YMU1_WHEAT	Uncharacterized protein	SubName: Full=Uncharacterized protein {ECO:0000313|EnsemblPlants:TRIAE_CS42_5AL_TGACv1_376565_AA1238540.1};
TRINITY_DN30193_c0_g1_i10	tr|A0A1D5YMU1|A0A1D5YMU1_WHEAT	256	8e-139	502.3	69		A0A1D5YMU1_WHEAT	Uncharacterized protein	SubName: Full=Uncharacterized protein {ECO:0000313|EnsemblPlants:TRIAE_CS42_5AL_TGACv1_376565_AA1238540.1};
TRINITY_DN30193_c0_g1_i3	tr|A0A1D5YMU1|A0A1D5YMU1_WHEAT	256	6.5e-135	489.6	56.9		A0A1D5YMU1_WHEAT	Uncharacterized protein	SubName: Full=Uncharacterized protein {ECO:0000313|EnsemblPlants:TRIAE_CS42_5AL_TGACv1_376565_AA1238540.1};
TRINITY_DN30108_c0_g1_i1	tr|A0A1D6DLQ9|A0A1D6DLQ9_WHEAT	28	0.00049	52.4	33.7		A0A1D6DLQ9_WHEAT	Uncharacterized protein	SubName: Full=Uncharacterized protein {ECO:0000313|EnsemblPlants:TRIAE_CS42_U_TGACv1_650650_AA2149270.1};
TRINITY_DN30192_c0_g1_i2	tr|M7Z9S0|M7Z9S0_TRIUA	33	7e-07	62.4	26.8	ORFNames=TRIUR3_32029 {ECO:0000313|EMBL:EMS49145.1};	M7Z9S0_TRIUA	Cysteine-rich receptor-like protein kinase 26	SubName: Full=Cysteine-rich receptor-like protein kinase 26 {ECO:0000313|EMBL:EMS49145.1, ECO:0000313|EnsemblPlants:TRIUR3_32029-P1};
TRINITY_DN30150_c0_g1_i2	tr|A0A1D6DCC3|A0A1D6DCC3_WHEAT	242	1.8e-129	470.7	91.6		A0A1D6DCC3_WHEAT	Uncharacterized protein	SubName: Full=Uncharacterized protein {ECO:0000313|EnsemblPlants:TRIAE_CS42_U_TGACv1_641611_AA2099450.1};
TRINITY_DN30150_c0_g1_i1	tr|A0A1D6DCC3|A0A1D6DCC3_WHEAT	232	1.7e-118	434.1	99.6		A0A1D6DCC3_WHEAT	Uncharacterized protein	SubName: Full=Uncharacterized protein {ECO:0000313|EnsemblPlants:TRIAE_CS42_U_TGACv1_641611_AA2099450.1};
TRINITY_DN30150_c0_g2_i1	tr|M8AVL0|M8AVL0_AEGTA	145	2.3e-65	256.9	99.5	ORFNames=F775_32154 {ECO:0000313|EMBL:EMT05464.1};	M8AVL0_AEGTA	Proton-coupled amino acid transporter 3	SubName: Full=Proton-coupled amino acid transporter 3 {ECO:0000313|EMBL:EMT05464.1, ECO:0000313|EnsemblPlants:EMT05464};
TRINITY_DN30150_c1_g1_i1	tr|A0A1D6DCC3|A0A1D6DCC3_WHEAT	94	1.5e-41	177.2	98.9		A0A1D6DCC3_WHEAT	Uncharacterized protein	SubName: Full=Uncharacterized protein {ECO:0000313|EnsemblPlants:TRIAE_CS42_U_TGACv1_641611_AA2099450.1};
TRINITY_DN30120_c0_g1_i1	tr|M8AQ53|M8AQ53_TRIUA	24	6.4e-05	55.5	26.1	ORFNames=TRIUR3_19389 {ECO:0000313|EMBL:EMS63129.1};	M8AQ53_TRIUA	Uncharacterized protein	SubName: Full=Uncharacterized protein {ECO:0000313|EMBL:EMS63129.1, ECO:0000313|EnsemblPlants:TRIUR3_19389-P1};
TRINITY_DN30168_c0_g1_i2	tr|M8CWP8|M8CWP8_AEGTA	149	2.9e-30	140.2	100	ORFNames=F775_26030 {ECO:0000313|EMBL:EMT32127.1};	M8CWP8_AEGTA	BRCA1-associated protein	SubName: Full=BRCA1-associated protein {ECO:0000313|EMBL:EMT32127.1, ECO:0000313|EnsemblPlants:EMT32127};
TRINITY_DN30168_c0_g1_i1	tr|F2ECJ1|F2ECJ1_HORVV	156	5.1e-30	139.4	100		F2ECJ1_HORVV	Predicted protein	SubName: Full=Predicted protein {ECO:0000313|EMBL:BAK05063.1};
TRINITY_DN30168_c0_g1_i3	tr|A0A1D5U3S1|A0A1D5U3S1_WHEAT	189	1.3e-23	118.6	100		A0A1D5U3S1_WHEAT	Uncharacterized protein	SubName: Full=Uncharacterized protein {ECO:0000313|EnsemblPlants:TRIAE_CS42_2BL_TGACv1_131722_AA0431150.1};
TRINITY_DN30134_c0_g1_i2	tr|N1QT48|N1QT48_AEGTA	48	5.1e-18	99.8	30.4	ORFNames=F775_18026 {ECO:0000313|EMBL:EMT02329.1};	N1QT48_AEGTA	Uncharacterized protein	SubName: Full=Uncharacterized protein {ECO:0000313|EMBL:EMT02329.1, ECO:0000313|EnsemblPlants:EMT02329};
TRINITY_DN30134_c0_g1_i1	tr|N1QT48|N1QT48_AEGTA	48	4e-18	100.1	29.9	ORFNames=F775_18026 {ECO:0000313|EMBL:EMT02329.1};	N1QT48_AEGTA	Uncharacterized protein	SubName: Full=Uncharacterized protein {ECO:0000313|EMBL:EMT02329.1, ECO:0000313|EnsemblPlants:EMT02329};
TRINITY_DN30125_c0_g1_i1	tr|R7WFR1|R7WFR1_AEGTA	129	2.1e-62	247.7	60.1	ORFNames=F775_20490 {ECO:0000313|EMBL:EMT19249.1};	R7WFR1_AEGTA	Uncharacterized protein	SubName: Full=Uncharacterized protein {ECO:0000313|EMBL:EMT19249.1, ECO:0000313|EnsemblPlants:EMT19249};
TRINITY_DN30125_c0_g1_i2	tr|M8AWI6|M8AWI6_AEGTA	336	2e-177	630.9	67.4	ORFNames=F775_05246 {ECO:0000313|EMBL:EMT08822.1};	M8AWI6_AEGTA	Uncharacterized protein	SubName: Full=Uncharacterized protein {ECO:0000313|EMBL:EMT08822.1, ECO:0000313|EnsemblPlants:EMT08822};
TRINITY_DN30125_c0_g1_i3	tr|R7WFR1|R7WFR1_AEGTA	165	1.5e-89	337.8	76.7	ORFNames=F775_20490 {ECO:0000313|EMBL:EMT19249.1};	R7WFR1_AEGTA	Uncharacterized protein	SubName: Full=Uncharacterized protein {ECO:0000313|EMBL:EMT19249.1, ECO:0000313|EnsemblPlants:EMT19249};
TRINITY_DN30125_c0_g1_i4	tr|R7WFR1|R7WFR1_AEGTA	128	8.3e-51	208.4	99.7	ORFNames=F775_20490 {ECO:0000313|EMBL:EMT19249.1};	R7WFR1_AEGTA	Uncharacterized protein	SubName: Full=Uncharacterized protein {ECO:0000313|EMBL:EMT19249.1, ECO:0000313|EnsemblPlants:EMT19249};
TRINITY_DN30125_c0_g2_i1	tr|M7ZN14|M7ZN14_TRIUA	90	4.9e-43	183	52.7	ORFNames=TRIUR3_10251 {ECO:0000313|EMBL:EMS53750.1};	M7ZN14_TRIUA	Uncharacterized protein	SubName: Full=Uncharacterized protein {ECO:0000313|EMBL:EMS53750.1, ECO:0000313|EnsemblPlants:TRIUR3_10251-P1};
TRINITY_DN30125_c0_g3_i2	tr|A0A1D6AWQ2|A0A1D6AWQ2_WHEAT	372	1.7e-218	767.7	61.8		A0A1D6AWQ2_WHEAT	Uncharacterized protein	SubName: Full=Uncharacterized protein {ECO:0000313|EnsemblPlants:TRIAE_CS42_6BS_TGACv1_513540_AA1644530.3};
TRINITY_DN30125_c0_g3_i1	tr|A0A1D6AWQ2|A0A1D6AWQ2_WHEAT	329	1.3e-191	678.3	55		A0A1D6AWQ2_WHEAT	Uncharacterized protein	SubName: Full=Uncharacterized protein {ECO:0000313|EnsemblPlants:TRIAE_CS42_6BS_TGACv1_513540_AA1644530.3};
TRINITY_DN30125_c0_g4_i3	tr|A0A1D6AIT8|A0A1D6AIT8_WHEAT	358	4.9e-202	712.6	77.3		A0A1D6AIT8_WHEAT	Uncharacterized protein	SubName: Full=Uncharacterized protein {ECO:0000313|EnsemblPlants:TRIAE_CS42_6AS_TGACv1_487402_AA1570420.1};
TRINITY_DN30125_c0_g4_i2	tr|A0A1D6AIT8|A0A1D6AIT8_WHEAT	360	8.1e-197	695.3	77.4		A0A1D6AIT8_WHEAT	Uncharacterized protein	SubName: Full=Uncharacterized protein {ECO:0000313|EnsemblPlants:TRIAE_CS42_6AS_TGACv1_487402_AA1570420.1};
TRINITY_DN30194_c0_g1_i2	tr|A0A1D6C3W1|A0A1D6C3W1_WHEAT	107	2.5e-56	226.5	99.7		A0A1D6C3W1_WHEAT	Uncharacterized protein	SubName: Full=Uncharacterized protein {ECO:0000313|EnsemblPlants:TRIAE_CS42_7BL_TGACv1_577109_AA1866180.1};
TRINITY_DN30194_c0_g1_i3	tr|A0A1D6C3W1|A0A1D6C3W1_WHEAT	167	1e-85	324.7	99.8		A0A1D6C3W1_WHEAT	Uncharacterized protein	SubName: Full=Uncharacterized protein {ECO:0000313|EnsemblPlants:TRIAE_CS42_7BL_TGACv1_577109_AA1866180.1};
TRINITY_DN30149_c0_g1_i11	tr|B8ASN8|B8ASN8_ORYSI	53	1.1e-22	114.8	45.6	ORFNames=OsI_16783 {ECO:0000313|EMBL:EEC77707.1};	B8ASN8_ORYSI	Uncharacterized protein	SubName: Full=Uncharacterized protein {ECO:0000313|EMBL:EEC77707.1};
TRINITY_DN30149_c0_g1_i4	tr|B8ASN8|B8ASN8_ORYSI	53	8.5e-23	114.8	60.7	ORFNames=OsI_16783 {ECO:0000313|EMBL:EEC77707.1};	B8ASN8_ORYSI	Uncharacterized protein	SubName: Full=Uncharacterized protein {ECO:0000313|EMBL:EEC77707.1};
TRINITY_DN30149_c0_g1_i9	tr|W5BE68|W5BE68_WHEAT	282	4e-149	536.2	93.1		W5BE68_WHEAT	Uncharacterized protein	SubName: Full=Uncharacterized protein {ECO:0000313|EnsemblPlants:TRIAE_CS42_2BL_TGACv1_130187_AA0405800.1};
TRINITY_DN30149_c0_g1_i8	tr|W5BE68|W5BE68_WHEAT	282	3.4e-151	543.5	68		W5BE68_WHEAT	Uncharacterized protein	SubName: Full=Uncharacterized protein {ECO:0000313|EnsemblPlants:TRIAE_CS42_2BL_TGACv1_130187_AA0405800.1};
TRINITY_DN30149_c0_g1_i13	tr|W5BE68|W5BE68_WHEAT	282	2.1e-148	534.3	68.5		W5BE68_WHEAT	Uncharacterized protein	SubName: Full=Uncharacterized protein {ECO:0000313|EnsemblPlants:TRIAE_CS42_2BL_TGACv1_130187_AA0405800.1};
TRINITY_DN30149_c0_g1_i5	tr|A0A1D5UQ31|A0A1D5UQ31_WHEAT	282	4.4e-146	526.6	68.5		A0A1D5UQ31_WHEAT	Uncharacterized protein	SubName: Full=Uncharacterized protein {ECO:0000313|EnsemblPlants:TRIAE_CS42_2DL_TGACv1_159966_AA0545000.2};
TRINITY_DN30149_c0_g1_i6	tr|W5BE68|W5BE68_WHEAT	282	2.3e-150	540.8	68.5		W5BE68_WHEAT	Uncharacterized protein	SubName: Full=Uncharacterized protein {ECO:0000313|EnsemblPlants:TRIAE_CS42_2BL_TGACv1_130187_AA0405800.1};
TRINITY_DN30149_c0_g1_i7	tr|A0A1D5UQ31|A0A1D5UQ31_WHEAT	282	4.8e-148	532.7	88.6		A0A1D5UQ31_WHEAT	Uncharacterized protein	SubName: Full=Uncharacterized protein {ECO:0000313|EnsemblPlants:TRIAE_CS42_2DL_TGACv1_159966_AA0545000.2};
TRINITY_DN30149_c0_g2_i1	tr|A0A1D5UQ31|A0A1D5UQ31_WHEAT	34	3.1e-10	73.2	34.9		A0A1D5UQ31_WHEAT	Uncharacterized protein	SubName: Full=Uncharacterized protein {ECO:0000313|EnsemblPlants:TRIAE_CS42_2DL_TGACv1_159966_AA0545000.2};
TRINITY_DN30183_c0_g1_i1	tr|A0A1D5TXZ1|A0A1D5TXZ1_WHEAT	107	2.2e-22	114	78.2		A0A1D5TXZ1_WHEAT	Uncharacterized protein	SubName: Full=Uncharacterized protein {ECO:0000313|EnsemblPlants:TRIAE_CS42_2BL_TGACv1_130043_AA0402250.1};
TRINITY_DN30183_c0_g1_i2	tr|M8CF09|M8CF09_AEGTA	55	2.1e-09	70.9	38.6	ORFNames=F775_01017 {ECO:0000313|EMBL:EMT33029.1};	M8CF09_AEGTA	Putative ATP-dependent helicase	SubName: Full=Putative ATP-dependent helicase {ECO:0000313|EMBL:EMT33029.1, ECO:0000313|EnsemblPlants:EMT33029};
TRINITY_DN30178_c0_g1_i1	tr|W5FPF4|W5FPF4_WHEAT	83	2e-35	156.8	93.6		W5FPF4_WHEAT	Uncharacterized protein	SubName: Full=Uncharacterized protein {ECO:0000313|EnsemblPlants:TRIAE_CS42_5BS_TGACv1_423317_AA1374140.1};
TRINITY_DN30174_c0_g1_i1	tr|A0A287TES2|A0A287TES2_HORVV	120	2e-38	168.3	43.7		A0A287TES2_HORVV	Uncharacterized protein	SubName: Full=Uncharacterized protein {ECO:0000313|EnsemblPlants:HORVU6Hr1G015430.8};
TRINITY_DN30174_c0_g2_i5	tr|A0A1D6AWY9|A0A1D6AWY9_WHEAT	277	2.7e-158	567.4	55.4		A0A1D6AWY9_WHEAT	Uncharacterized protein	SubName: Full=Uncharacterized protein {ECO:0000313|EnsemblPlants:TRIAE_CS42_6BS_TGACv1_513616_AA1645840.1};
TRINITY_DN30174_c0_g2_i6	tr|A0A1D6AG04|A0A1D6AG04_WHEAT	277	7.1e-157	562.4	68.8		A0A1D6AG04_WHEAT	Uncharacterized protein	SubName: Full=Uncharacterized protein {ECO:0000313|EnsemblPlants:TRIAE_CS42_6AS_TGACv1_485890_AA1553730.1};
TRINITY_DN30174_c0_g2_i1	tr|A0A1D6AG04|A0A1D6AG04_WHEAT	276	4.4e-158	566.6	58.6		A0A1D6AG04_WHEAT	Uncharacterized protein	SubName: Full=Uncharacterized protein {ECO:0000313|EnsemblPlants:TRIAE_CS42_6AS_TGACv1_485890_AA1553730.1};
TRINITY_DN30174_c0_g2_i2	tr|A0A1D6AWY9|A0A1D6AWY9_WHEAT	277	2.1e-158	567.4	73.1		A0A1D6AWY9_WHEAT	Uncharacterized protein	SubName: Full=Uncharacterized protein {ECO:0000313|EnsemblPlants:TRIAE_CS42_6BS_TGACv1_513616_AA1645840.1};
TRINITY_DN30174_c0_g2_i3	tr|A0A1D6AWY9|A0A1D6AWY9_WHEAT	277	2.7e-158	567.4	56.9		A0A1D6AWY9_WHEAT	Uncharacterized protein	SubName: Full=Uncharacterized protein {ECO:0000313|EnsemblPlants:TRIAE_CS42_6BS_TGACv1_513616_AA1645840.1};
TRINITY_DN30174_c1_g1_i1	tr|A0A1D6B6I1|A0A1D6B6I1_WHEAT	117	3.9e-26	127.9	33.4		A0A1D6B6I1_WHEAT	Uncharacterized protein	SubName: Full=Uncharacterized protein {ECO:0000313|EnsemblPlants:TRIAE_CS42_6DL_TGACv1_527062_AA1697840.1};
TRINITY_DN30174_c1_g1_i4	tr|R7WC96|R7WC96_AEGTA	42	2e-16	94.7	22.3	ORFNames=F775_32174 {ECO:0000313|EMBL:EMT20237.1};	R7WC96_AEGTA	Uncharacterized protein	SubName: Full=Uncharacterized protein {ECO:0000313|EMBL:EMT20237.1, ECO:0000313|EnsemblPlants:EMT20237};
TRINITY_DN30174_c1_g1_i3	tr|M8A0A1|M8A0A1_TRIUA	209	7.6e-30	140.2	53.7	ORFNames=TRIUR3_35017 {ECO:0000313|EMBL:EMS65712.1};	M8A0A1_TRIUA	Separin	SubName: Full=Separin {ECO:0000313|EMBL:EMS65712.1, ECO:0000313|EnsemblPlants:TRIUR3_35017-P1};
TRINITY_DN30174_c1_g1_i7	tr|A0A1D6B6I1|A0A1D6B6I1_WHEAT	113	9.4e-26	126.3	38.9		A0A1D6B6I1_WHEAT	Uncharacterized protein	SubName: Full=Uncharacterized protein {ECO:0000313|EnsemblPlants:TRIAE_CS42_6DL_TGACv1_527062_AA1697840.1};
TRINITY_DN30174_c1_g1_i5	tr|M8A0A1|M8A0A1_TRIUA	196	3.5e-27	131.3	54.1	ORFNames=TRIUR3_35017 {ECO:0000313|EMBL:EMS65712.1};	M8A0A1_TRIUA	Separin	SubName: Full=Separin {ECO:0000313|EMBL:EMS65712.1, ECO:0000313|EnsemblPlants:TRIUR3_35017-P1};
TRINITY_DN30128_c0_g1_i6	tr|R7W4G5|R7W4G5_AEGTA	173	2.8e-94	353.2	99.6	ORFNames=F775_04249 {ECO:0000313|EMBL:EMT01786.1};	R7W4G5_AEGTA	Flavonoid 3',5'-hydroxylase 1	SubName: Full=Flavonoid 3',5'-hydroxylase 1 {ECO:0000313|EMBL:EMT01786.1, ECO:0000313|EnsemblPlants:EMT01786};
TRINITY_DN30128_c0_g1_i5	tr|A0A1D5ZS17|A0A1D5ZS17_WHEAT	173	4.8e-94	352.4	99.6		A0A1D5ZS17_WHEAT	Uncharacterized protein	SubName: Full=Uncharacterized protein {ECO:0000313|EnsemblPlants:TRIAE_CS42_5DL_TGACv1_434375_AA1434870.1};
TRINITY_DN30128_c0_g1_i2	tr|R7W4G5|R7W4G5_AEGTA	142	2.6e-77	296.6	99.3	ORFNames=F775_04249 {ECO:0000313|EMBL:EMT01786.1};	R7W4G5_AEGTA	Flavonoid 3',5'-hydroxylase 1	SubName: Full=Flavonoid 3',5'-hydroxylase 1 {ECO:0000313|EMBL:EMT01786.1, ECO:0000313|EnsemblPlants:EMT01786};
TRINITY_DN30128_c0_g1_i1	tr|R7W4G5|R7W4G5_AEGTA	154	1.7e-82	313.9	99.4	ORFNames=F775_04249 {ECO:0000313|EMBL:EMT01786.1};	R7W4G5_AEGTA	Flavonoid 3',5'-hydroxylase 1	SubName: Full=Flavonoid 3',5'-hydroxylase 1 {ECO:0000313|EMBL:EMT01786.1, ECO:0000313|EnsemblPlants:EMT01786};
TRINITY_DN30128_c0_g1_i4	tr|R7W4G5|R7W4G5_AEGTA	173	6.3e-94	352.1	99.6	ORFNames=F775_04249 {ECO:0000313|EMBL:EMT01786.1};	R7W4G5_AEGTA	Flavonoid 3',5'-hydroxylase 1	SubName: Full=Flavonoid 3',5'-hydroxylase 1 {ECO:0000313|EMBL:EMT01786.1, ECO:0000313|EnsemblPlants:EMT01786};
TRINITY_DN30128_c0_g2_i1	tr|R7W8Z6|R7W8Z6_AEGTA	119	6.9e-46	192.2	82.6	ORFNames=F775_17770 {ECO:0000313|EMBL:EMT17908.1};	R7W8Z6_AEGTA	Flavonoid 3'-monooxygenase	SubName: Full=Flavonoid 3'-monooxygenase {ECO:0000313|EMBL:EMT17908.1, ECO:0000313|EnsemblPlants:EMT17908};
TRINITY_DN30114_c0_g1_i1	tr|A0A1D5VDC6|A0A1D5VDC6_WHEAT	112	9.5e-59	234.6	99.1		A0A1D5VDC6_WHEAT	Uncharacterized protein	SubName: Full=Uncharacterized protein {ECO:0000313|EnsemblPlants:TRIAE_CS42_3AL_TGACv1_196072_AA0657120.1};
TRINITY_DN30114_c0_g1_i3	tr|A0A1D5VDC6|A0A1D5VDC6_WHEAT	91	2.1e-45	190.7	58.8		A0A1D5VDC6_WHEAT	Uncharacterized protein	SubName: Full=Uncharacterized protein {ECO:0000313|EnsemblPlants:TRIAE_CS42_3AL_TGACv1_196072_AA0657120.1};
TRINITY_DN30114_c0_g1_i2	tr|A0A1D5VDC6|A0A1D5VDC6_WHEAT	91	2.9e-46	193.4	68.2		A0A1D5VDC6_WHEAT	Uncharacterized protein	SubName: Full=Uncharacterized protein {ECO:0000313|EnsemblPlants:TRIAE_CS42_3AL_TGACv1_196072_AA0657120.1};
TRINITY_DN30161_c0_g2_i2	tr|A0A1D5VK83|A0A1D5VK83_WHEAT	29	0.00038	54.3	12		A0A1D5VK83_WHEAT	Uncharacterized protein	SubName: Full=Uncharacterized protein {ECO:0000313|EnsemblPlants:TRIAE_CS42_3AS_TGACv1_211848_AA0694890.1};
TRINITY_DN30137_c0_g1_i2	tr|A0A1D6CFX6|A0A1D6CFX6_WHEAT	242	1.1e-118	434.9	95.7		A0A1D6CFX6_WHEAT	Xyloglucan endotransglucosylase/hydrolase	RecName: Full=Xyloglucan endotransglucosylase/hydrolase {ECO:0000256|RuleBase:RU361120}; EC=2.4.1.207 {ECO:0000256|RuleBase:RU361120};
TRINITY_DN30137_c0_g1_i3	tr|A0A1D6DGF5|A0A1D6DGF5_WHEAT	290	2.8e-170	606.7	84.1		A0A1D6DGF5_WHEAT	Xyloglucan endotransglucosylase/hydrolase	RecName: Full=Xyloglucan endotransglucosylase/hydrolase {ECO:0000256|RuleBase:RU361120}; EC=2.4.1.207 {ECO:0000256|RuleBase:RU361120};
TRINITY_DN30137_c0_g1_i1	tr|A0A1D6CFX6|A0A1D6CFX6_WHEAT	290	3.7e-170	606.3	82.6		A0A1D6CFX6_WHEAT	Xyloglucan endotransglucosylase/hydrolase	RecName: Full=Xyloglucan endotransglucosylase/hydrolase {ECO:0000256|RuleBase:RU361120}; EC=2.4.1.207 {ECO:0000256|RuleBase:RU361120};
TRINITY_DN144_c0_g1_i10	tr|A0A1D6A896|A0A1D6A896_WHEAT	323	1.5e-176	628.2	57.8		A0A1D6A896_WHEAT	Aldehyde dehydrogenase	RecName: Full=Aldehyde dehydrogenase {ECO:0000256|PIRNR:PIRNR036492};
TRINITY_DN144_c0_g1_i7	tr|A0A1D5TCF8|A0A1D5TCF8_WHEAT	469	3.5e-259	902.9	73.3		A0A1D5TCF8_WHEAT	Aldehyde dehydrogenase	RecName: Full=Aldehyde dehydrogenase {ECO:0000256|PIRNR:PIRNR036492};
TRINITY_DN144_c0_g1_i8	tr|A0A1D6A896|A0A1D6A896_WHEAT	323	2.4e-177	630.9	55.2		A0A1D6A896_WHEAT	Aldehyde dehydrogenase	RecName: Full=Aldehyde dehydrogenase {ECO:0000256|PIRNR:PIRNR036492};
TRINITY_DN144_c0_g1_i1	tr|A0A1D5UK85|A0A1D5UK85_WHEAT	531	1.5e-279	970.7	75.2		A0A1D5UK85_WHEAT	Aldehyde dehydrogenase	RecName: Full=Aldehyde dehydrogenase {ECO:0000256|PIRNR:PIRNR036492};
TRINITY_DN144_c0_g1_i6	tr|A0A1D5TCF8|A0A1D5TCF8_WHEAT	469	1.2e-258	901	80.6		A0A1D5TCF8_WHEAT	Aldehyde dehydrogenase	RecName: Full=Aldehyde dehydrogenase {ECO:0000256|PIRNR:PIRNR036492};
TRINITY_DN144_c0_g1_i5	tr|A0A1D5UK85|A0A1D5UK85_WHEAT	531	5.8e-279	968.8	75.2		A0A1D5UK85_WHEAT	Aldehyde dehydrogenase	RecName: Full=Aldehyde dehydrogenase {ECO:0000256|PIRNR:PIRNR036492};
TRINITY_DN144_c0_g1_i2	tr|A0A1D6A896|A0A1D6A896_WHEAT	323	2.1e-177	630.9	62.3		A0A1D6A896_WHEAT	Aldehyde dehydrogenase	RecName: Full=Aldehyde dehydrogenase {ECO:0000256|PIRNR:PIRNR036492};
TRINITY_DN144_c0_g1_i3	tr|A0A1D6A896|A0A1D6A896_WHEAT	482	2.7e-253	883.2	81.8		A0A1D6A896_WHEAT	Aldehyde dehydrogenase	RecName: Full=Aldehyde dehydrogenase {ECO:0000256|PIRNR:PIRNR036492};
TRINITY_DN144_c0_g1_i4	tr|A0A1D6A896|A0A1D6A896_WHEAT	464	1.1e-258	901	86.2		A0A1D6A896_WHEAT	Aldehyde dehydrogenase	RecName: Full=Aldehyde dehydrogenase {ECO:0000256|PIRNR:PIRNR036492};
TRINITY_DN144_c0_g1_i12	tr|A0A1D5UK85|A0A1D5UK85_WHEAT	531	2.6e-279	969.9	74.6		A0A1D5UK85_WHEAT	Aldehyde dehydrogenase	RecName: Full=Aldehyde dehydrogenase {ECO:0000256|PIRNR:PIRNR036492};
TRINITY_DN144_c0_g1_i11	tr|A0A1D6A896|A0A1D6A896_WHEAT	414	6.7e-226	792	84.8		A0A1D6A896_WHEAT	Aldehyde dehydrogenase	RecName: Full=Aldehyde dehydrogenase {ECO:0000256|PIRNR:PIRNR036492};
TRINITY_DN144_c0_g1_i13	tr|A0A1D6A896|A0A1D6A896_WHEAT	437	5.9e-241	842	85.5		A0A1D6A896_WHEAT	Aldehyde dehydrogenase	RecName: Full=Aldehyde dehydrogenase {ECO:0000256|PIRNR:PIRNR036492};
TRINITY_DN144_c0_g2_i1	tr|A0A1D6ARW6|A0A1D6ARW6_WHEAT	63	2.4e-26	126.7	65.4		A0A1D6ARW6_WHEAT	Aldehyde dehydrogenase	RecName: Full=Aldehyde dehydrogenase {ECO:0000256|PIRNR:PIRNR036492};
TRINITY_DN179_c0_g1_i12	tr|A0A1D5V6A0|A0A1D5V6A0_WHEAT	359	5.7e-196	694.1	24.3		A0A1D5V6A0_WHEAT	Uncharacterized protein	SubName: Full=Uncharacterized protein {ECO:0000313|EnsemblPlants:TRIAE_CS42_3AL_TGACv1_194056_AA0625600.2};
TRINITY_DN179_c0_g1_i5	tr|N1R2E2|N1R2E2_AEGTA	131	1.4e-37	168.3	6.9	ORFNames=F775_06307 {ECO:0000313|EMBL:EMT13239.1};	N1R2E2_AEGTA	Uncharacterized protein	SubName: Full=Uncharacterized protein {ECO:0000313|EMBL:EMT13239.1, ECO:0000313|EnsemblPlants:EMT13239};
TRINITY_DN179_c0_g1_i7	tr|N1R2E2|N1R2E2_AEGTA	131	5e-36	163.3	6.1	ORFNames=F775_06307 {ECO:0000313|EMBL:EMT13239.1};	N1R2E2_AEGTA	Uncharacterized protein	SubName: Full=Uncharacterized protein {ECO:0000313|EMBL:EMT13239.1, ECO:0000313|EnsemblPlants:EMT13239};
TRINITY_DN179_c0_g1_i10	tr|A0A1D5TSM9|A0A1D5TSM9_WHEAT	112	1.7e-28	137.5	9.2		A0A1D5TSM9_WHEAT	Uncharacterized protein	SubName: Full=Uncharacterized protein {ECO:0000313|EnsemblPlants:TRIAE_CS42_2BL_TGACv1_129308_AA0377710.1};
TRINITY_DN179_c0_g1_i8	tr|M7YLT7|M7YLT7_TRIUA	93	4.1e-21	113.6	4.9	ORFNames=TRIUR3_30658 {ECO:0000313|EMBL:EMS47866.1};	M7YLT7_TRIUA	Uncharacterized protein	SubName: Full=Uncharacterized protein {ECO:0000313|EMBL:EMS47866.1, ECO:0000313|EnsemblPlants:TRIUR3_30658-P1};
TRINITY_DN179_c0_g1_i15	tr|A0A1D5V6A0|A0A1D5V6A0_WHEAT	359	2.3e-196	694.1	60		A0A1D5V6A0_WHEAT	Uncharacterized protein	SubName: Full=Uncharacterized protein {ECO:0000313|EnsemblPlants:TRIAE_CS42_3AL_TGACv1_194056_AA0625600.2};
TRINITY_DN179_c0_g1_i17	tr|A0A1D5TSM9|A0A1D5TSM9_WHEAT	112	2.9e-28	136.7	9.2		A0A1D5TSM9_WHEAT	Uncharacterized protein	SubName: Full=Uncharacterized protein {ECO:0000313|EnsemblPlants:TRIAE_CS42_2BL_TGACv1_129308_AA0377710.1};
TRINITY_DN179_c0_g1_i6	tr|A0A1D5TSM9|A0A1D5TSM9_WHEAT	129	5.7e-32	149.4	8.1		A0A1D5TSM9_WHEAT	Uncharacterized protein	SubName: Full=Uncharacterized protein {ECO:0000313|EnsemblPlants:TRIAE_CS42_2BL_TGACv1_129308_AA0377710.1};
TRINITY_DN179_c0_g1_i4	tr|A0A1D5V6A0|A0A1D5V6A0_WHEAT	359	5.5e-196	694.1	25.4		A0A1D5V6A0_WHEAT	Uncharacterized protein	SubName: Full=Uncharacterized protein {ECO:0000313|EnsemblPlants:TRIAE_CS42_3AL_TGACv1_194056_AA0625600.2};
TRINITY_DN179_c0_g1_i1	tr|A0A1D5V6A0|A0A1D5V6A0_WHEAT	359	1.8e-196	694.1	75.7		A0A1D5V6A0_WHEAT	Uncharacterized protein	SubName: Full=Uncharacterized protein {ECO:0000313|EnsemblPlants:TRIAE_CS42_3AL_TGACv1_194056_AA0625600.2};
TRINITY_DN179_c0_g1_i11	tr|A0A1D5V6A0|A0A1D5V6A0_WHEAT	359	2.2e-196	694.1	63.7		A0A1D5V6A0_WHEAT	Uncharacterized protein	SubName: Full=Uncharacterized protein {ECO:0000313|EnsemblPlants:TRIAE_CS42_3AL_TGACv1_194056_AA0625600.2};
TRINITY_DN179_c0_g1_i3	tr|N1R2E2|N1R2E2_AEGTA	131	5e-36	163.3	6.1	ORFNames=F775_06307 {ECO:0000313|EMBL:EMT13239.1};	N1R2E2_AEGTA	Uncharacterized protein	SubName: Full=Uncharacterized protein {ECO:0000313|EMBL:EMT13239.1, ECO:0000313|EnsemblPlants:EMT13239};
TRINITY_DN179_c0_g1_i14	tr|N1R2E2|N1R2E2_AEGTA	131	4.6e-36	163.3	6.6	ORFNames=F775_06307 {ECO:0000313|EMBL:EMT13239.1};	N1R2E2_AEGTA	Uncharacterized protein	SubName: Full=Uncharacterized protein {ECO:0000313|EMBL:EMT13239.1, ECO:0000313|EnsemblPlants:EMT13239};
TRINITY_DN179_c0_g1_i16	tr|A0A1D5TSM9|A0A1D5TSM9_WHEAT	139	7.5e-24	122.1	11.2		A0A1D5TSM9_WHEAT	Uncharacterized protein	SubName: Full=Uncharacterized protein {ECO:0000313|EnsemblPlants:TRIAE_CS42_2BL_TGACv1_129308_AA0377710.1};
TRINITY_DN179_c0_g1_i2	tr|M7YLT7|M7YLT7_TRIUA	93	4.4e-21	113.6	4.5	ORFNames=TRIUR3_30658 {ECO:0000313|EMBL:EMS47866.1};	M7YLT7_TRIUA	Uncharacterized protein	SubName: Full=Uncharacterized protein {ECO:0000313|EMBL:EMS47866.1, ECO:0000313|EnsemblPlants:TRIUR3_30658-P1};
TRINITY_DN179_c1_g1_i1	tr|M8B093|M8B093_AEGTA	151	6.5e-81	310.5	27.9	ORFNames=F775_28004 {ECO:0000313|EMBL:EMT07411.1};	M8B093_AEGTA	Uncharacterized protein	SubName: Full=Uncharacterized protein {ECO:0000313|EMBL:EMT07411.1, ECO:0000313|EnsemblPlants:EMT07411};
TRINITY_DN179_c1_g1_i3	tr|M8B093|M8B093_AEGTA	160	4.9e-80	305.8	95.6	ORFNames=F775_28004 {ECO:0000313|EMBL:EMT07411.1};	M8B093_AEGTA	Uncharacterized protein	SubName: Full=Uncharacterized protein {ECO:0000313|EMBL:EMT07411.1, ECO:0000313|EnsemblPlants:EMT07411};
TRINITY_DN179_c1_g1_i2	tr|M8B093|M8B093_AEGTA	166	3.1e-90	340.1	75.2	ORFNames=F775_28004 {ECO:0000313|EMBL:EMT07411.1};	M8B093_AEGTA	Uncharacterized protein	SubName: Full=Uncharacterized protein {ECO:0000313|EMBL:EMT07411.1, ECO:0000313|EnsemblPlants:EMT07411};
TRINITY_DN179_c3_g1_i3	tr|A0A287JY55|A0A287JY55_HORVV	39	6.1e-05	55.1	57.9		A0A287JY55_HORVV	Uncharacterized protein	SubName: Full=Uncharacterized protein {ECO:0000313|EnsemblPlants:HORVU3Hr1G003060.20};
TRINITY_DN159_c0_g1_i3	tr|W5C6Z3|W5C6Z3_WHEAT	183	4.4e-97	364.4	29		W5C6Z3_WHEAT	HVA22-like protein	RecName: Full=HVA22-like protein {ECO:0000256|RuleBase:RU362006};
TRINITY_DN159_c0_g1_i1	tr|W5C6Z3|W5C6Z3_WHEAT	195	2.8e-103	384.4	46		W5C6Z3_WHEAT	HVA22-like protein	RecName: Full=HVA22-like protein {ECO:0000256|RuleBase:RU362006};
TRINITY_DN159_c0_g1_i6	tr|W5C6Z3|W5C6Z3_WHEAT	195	2.8e-103	384.4	46		W5C6Z3_WHEAT	HVA22-like protein	RecName: Full=HVA22-like protein {ECO:0000256|RuleBase:RU362006};
TRINITY_DN159_c0_g1_i2	tr|A0A1D5UWE9|A0A1D5UWE9_WHEAT	58	8e-25	122.9	25.9		A0A1D5UWE9_WHEAT	HVA22-like protein	RecName: Full=HVA22-like protein {ECO:0000256|RuleBase:RU362006};
TRINITY_DN159_c0_g1_i8	tr|M7ZIQ5|M7ZIQ5_TRIUA	86	9.4e-35	157.1	15.7	ORFNames=TRIUR3_18518 {ECO:0000313|EMBL:EMS63093.1};	M7ZIQ5_TRIUA	HVA22-like protein	RecName: Full=HVA22-like protein {ECO:0000256|RuleBase:RU362006};
TRINITY_DN159_c0_g1_i4	tr|A0A1D5UWE9|A0A1D5UWE9_WHEAT	63	1.7e-24	123.2	10.4		A0A1D5UWE9_WHEAT	HVA22-like protein	RecName: Full=HVA22-like protein {ECO:0000256|RuleBase:RU362006};
TRINITY_DN159_c0_g1_i9	tr|A0A1D5UWE9|A0A1D5UWE9_WHEAT	172	2.2e-93	351.3	49.1		A0A1D5UWE9_WHEAT	HVA22-like protein	RecName: Full=HVA22-like protein {ECO:0000256|RuleBase:RU362006};
TRINITY_DN159_c0_g1_i5	tr|W5C6Z3|W5C6Z3_WHEAT	195	2.8e-103	384.4	45.4		W5C6Z3_WHEAT	HVA22-like protein	RecName: Full=HVA22-like protein {ECO:0000256|RuleBase:RU362006};
TRINITY_DN159_c0_g1_i7	tr|W5C6Z3|W5C6Z3_WHEAT	183	4.5e-97	364	37.8		W5C6Z3_WHEAT	HVA22-like protein	RecName: Full=HVA22-like protein {ECO:0000256|RuleBase:RU362006};
TRINITY_DN153_c0_g1_i9	tr|A0A1D6B7S9|A0A1D6B7S9_WHEAT	93	3e-47	199.5	9.4		A0A1D6B7S9_WHEAT	Uncharacterized protein	SubName: Full=Uncharacterized protein {ECO:0000313|EnsemblPlants:TRIAE_CS42_6DL_TGACv1_527403_AA1703440.1};
TRINITY_DN153_c0_g1_i12	tr|A0A1D6B7S9|A0A1D6B7S9_WHEAT	93	2.7e-47	199.5	10.5		A0A1D6B7S9_WHEAT	Uncharacterized protein	SubName: Full=Uncharacterized protein {ECO:0000313|EnsemblPlants:TRIAE_CS42_6DL_TGACv1_527403_AA1703440.1};
TRINITY_DN153_c0_g1_i4	tr|A0A1D6B7S9|A0A1D6B7S9_WHEAT	93	1.8e-47	199.5	15.4		A0A1D6B7S9_WHEAT	Uncharacterized protein	SubName: Full=Uncharacterized protein {ECO:0000313|EnsemblPlants:TRIAE_CS42_6DL_TGACv1_527403_AA1703440.1};
TRINITY_DN153_c0_g1_i3	tr|A0A1D6B7S9|A0A1D6B7S9_WHEAT	93	3e-47	199.5	9.2		A0A1D6B7S9_WHEAT	Uncharacterized protein	SubName: Full=Uncharacterized protein {ECO:0000313|EnsemblPlants:TRIAE_CS42_6DL_TGACv1_527403_AA1703440.1};
TRINITY_DN153_c0_g1_i5	tr|A0A1D6B7S9|A0A1D6B7S9_WHEAT	93	3e-47	199.5	9.3		A0A1D6B7S9_WHEAT	Uncharacterized protein	SubName: Full=Uncharacterized protein {ECO:0000313|EnsemblPlants:TRIAE_CS42_6DL_TGACv1_527403_AA1703440.1};
TRINITY_DN153_c0_g1_i11	tr|A0A1D5V1V0|A0A1D5V1V0_WHEAT	129	1.7e-25	124.4	84.9		A0A1D5V1V0_WHEAT	Uncharacterized protein	SubName: Full=Uncharacterized protein {ECO:0000313|EnsemblPlants:TRIAE_CS42_2DS_TGACv1_178874_AA0601990.1};
TRINITY_DN153_c0_g1_i20	tr|A0A1D6B7S9|A0A1D6B7S9_WHEAT	93	3.1e-47	199.5	9.1		A0A1D6B7S9_WHEAT	Uncharacterized protein	SubName: Full=Uncharacterized protein {ECO:0000313|EnsemblPlants:TRIAE_CS42_6DL_TGACv1_527403_AA1703440.1};
TRINITY_DN153_c0_g1_i6	tr|A0A1D6B7S9|A0A1D6B7S9_WHEAT	93	1.6e-47	199.5	17.5		A0A1D6B7S9_WHEAT	Uncharacterized protein	SubName: Full=Uncharacterized protein {ECO:0000313|EnsemblPlants:TRIAE_CS42_6DL_TGACv1_527403_AA1703440.1};
TRINITY_DN153_c0_g1_i13	tr|M7YKC3|M7YKC3_TRIUA	479	6.1e-50	208.4	50.8	ORFNames=TRIUR3_14115 {ECO:0000313|EMBL:EMS47717.1};	M7YKC3_TRIUA	G-type lectin S-receptor-like serine/threonine-protein kinase SD1-29	SubName: Full=G-type lectin S-receptor-like serine/threonine-protein kinase SD1-29 {ECO:0000313|EMBL:EMS47717.1, ECO:0000313|EnsemblPlants:TRIUR3_14115-P1};
TRINITY_DN153_c0_g1_i1	tr|A0A1D6B7S9|A0A1D6B7S9_WHEAT	93	2.8e-47	199.5	9.9		A0A1D6B7S9_WHEAT	Uncharacterized protein	SubName: Full=Uncharacterized protein {ECO:0000313|EnsemblPlants:TRIAE_CS42_6DL_TGACv1_527403_AA1703440.1};
TRINITY_DN153_c0_g1_i8	tr|A0A1D6B7S9|A0A1D6B7S9_WHEAT	93	1.9e-47	199.5	14.5		A0A1D6B7S9_WHEAT	Uncharacterized protein	SubName: Full=Uncharacterized protein {ECO:0000313|EnsemblPlants:TRIAE_CS42_6DL_TGACv1_527403_AA1703440.1};
TRINITY_DN153_c0_g1_i7	tr|A0A1D6B7S9|A0A1D6B7S9_WHEAT	93	2.7e-47	199.5	10.2		A0A1D6B7S9_WHEAT	Uncharacterized protein	SubName: Full=Uncharacterized protein {ECO:0000313|EnsemblPlants:TRIAE_CS42_6DL_TGACv1_527403_AA1703440.1};
TRINITY_DN153_c0_g1_i21	tr|A0A1D6B7S9|A0A1D6B7S9_WHEAT	93	3e-47	199.5	9.4		A0A1D6B7S9_WHEAT	Uncharacterized protein	SubName: Full=Uncharacterized protein {ECO:0000313|EnsemblPlants:TRIAE_CS42_6DL_TGACv1_527403_AA1703440.1};
TRINITY_DN153_c0_g2_i1	tr|A0A1D5V1V0|A0A1D5V1V0_WHEAT	61	5.1e-23	115.9	52		A0A1D5V1V0_WHEAT	Uncharacterized protein	SubName: Full=Uncharacterized protein {ECO:0000313|EnsemblPlants:TRIAE_CS42_2DS_TGACv1_178874_AA0601990.1};
TRINITY_DN130_c0_g1_i1	tr|A0A287M3A6|A0A287M3A6_HORVV	198	6.4e-99	371.3	17.8		A0A287M3A6_HORVV	Uncharacterized protein	SubName: Full=Uncharacterized protein {ECO:0000313|EnsemblPlants:HORVU3Hr1G086540.2};
TRINITY_DN130_c0_g1_i4	tr|A0A287M3A6|A0A287M3A6_HORVV	223	2.4e-113	417.2	85.8		A0A287M3A6_HORVV	Uncharacterized protein	SubName: Full=Uncharacterized protein {ECO:0000313|EnsemblPlants:HORVU3Hr1G086540.2};
TRINITY_DN130_c0_g1_i3	tr|A0A287M3A6|A0A287M3A6_HORVV	198	6.3e-99	371.3	18.1		A0A287M3A6_HORVV	Uncharacterized protein	SubName: Full=Uncharacterized protein {ECO:0000313|EnsemblPlants:HORVU3Hr1G086540.2};
TRINITY_DN130_c0_g2_i1	tr|W4ZSH7|W4ZSH7_WHEAT	169	1.1e-92	349	45.8		W4ZSH7_WHEAT	Uncharacterized protein	SubName: Full=Uncharacterized protein {ECO:0000313|EnsemblPlants:TRIAE_CS42_1BL_TGACv1_033696_AA0141410.1};
TRINITY_DN106_c0_g1_i1	tr|A0A1D5WWI1|A0A1D5WWI1_WHEAT	320	1.3e-166	595.1	59.7		A0A1D5WWI1_WHEAT	Uncharacterized protein	SubName: Full=Uncharacterized protein {ECO:0000313|EnsemblPlants:TRIAE_CS42_3DS_TGACv1_273589_AA0932290.2};
TRINITY_DN106_c0_g1_i4	tr|A0A1D5WWI1|A0A1D5WWI1_WHEAT	280	3.3e-145	523.1	99.8		A0A1D5WWI1_WHEAT	Uncharacterized protein	SubName: Full=Uncharacterized protein {ECO:0000313|EnsemblPlants:TRIAE_CS42_3DS_TGACv1_273589_AA0932290.2};
TRINITY_DN106_c0_g1_i3	tr|A0A1D5WWI1|A0A1D5WWI1_WHEAT	320	4.1e-168	600.1	60.2		A0A1D5WWI1_WHEAT	Uncharacterized protein	SubName: Full=Uncharacterized protein {ECO:0000313|EnsemblPlants:TRIAE_CS42_3DS_TGACv1_273589_AA0932290.2};
TRINITY_DN106_c0_g1_i2	tr|A0A1D5WWI1|A0A1D5WWI1_WHEAT	320	5.6e-170	606.3	60.4		A0A1D5WWI1_WHEAT	Uncharacterized protein	SubName: Full=Uncharacterized protein {ECO:0000313|EnsemblPlants:TRIAE_CS42_3DS_TGACv1_273589_AA0932290.2};
TRINITY_DN106_c0_g1_i5	tr|A0A1D5WWI1|A0A1D5WWI1_WHEAT	320	5.7e-170	606.3	60.2		A0A1D5WWI1_WHEAT	Uncharacterized protein	SubName: Full=Uncharacterized protein {ECO:0000313|EnsemblPlants:TRIAE_CS42_3DS_TGACv1_273589_AA0932290.2};
TRINITY_DN154_c0_g1_i2	tr|I0JTW4|I0JTW4_WHEAT	404	5.5e-244	852.4	62.3		I0JTW4_WHEAT	F-box domain containing protein,putative,expressed	SubName: Full=F-box domain containing protein,putative,expressed {ECO:0000313|EMBL:CCG48016.1, ECO:0000313|EnsemblPlants:TRIAE_CS42_3DS_TGACv1_272041_AA0913630.1};
TRINITY_DN154_c0_g1_i6	tr|I0JTW4|I0JTW4_WHEAT	404	7e-240	838.2	95.9		I0JTW4_WHEAT	F-box domain containing protein,putative,expressed	SubName: Full=F-box domain containing protein,putative,expressed {ECO:0000313|EMBL:CCG48016.1, ECO:0000313|EnsemblPlants:TRIAE_CS42_3DS_TGACv1_272041_AA0913630.1};
TRINITY_DN154_c0_g1_i10	tr|I0JTW4|I0JTW4_WHEAT	404	6e-244	852.4	57.2		I0JTW4_WHEAT	F-box domain containing protein,putative,expressed	SubName: Full=F-box domain containing protein,putative,expressed {ECO:0000313|EMBL:CCG48016.1, ECO:0000313|EnsemblPlants:TRIAE_CS42_3DS_TGACv1_272041_AA0913630.1};
TRINITY_DN154_c0_g1_i5	tr|I0JTW4|I0JTW4_WHEAT	404	8e-243	848.6	62		I0JTW4_WHEAT	F-box domain containing protein,putative,expressed	SubName: Full=F-box domain containing protein,putative,expressed {ECO:0000313|EMBL:CCG48016.1, ECO:0000313|EnsemblPlants:TRIAE_CS42_3DS_TGACv1_272041_AA0913630.1};
TRINITY_DN194_c0_g1_i1	tr|A0A1D6CS38|A0A1D6CS38_WHEAT	790	0	1294.3	79.8		A0A1D6CS38_WHEAT	Uncharacterized protein	SubName: Full=Uncharacterized protein {ECO:0000313|EnsemblPlants:TRIAE_CS42_7DL_TGACv1_604100_AA1993750.1};
TRINITY_DN194_c0_g1_i3	tr|A0A1D6CS38|A0A1D6CS38_WHEAT	790	0	1295.8	79.8		A0A1D6CS38_WHEAT	Uncharacterized protein	SubName: Full=Uncharacterized protein {ECO:0000313|EnsemblPlants:TRIAE_CS42_7DL_TGACv1_604100_AA1993750.1};
TRINITY_DN194_c0_g1_i2	tr|A0A1D6CS38|A0A1D6CS38_WHEAT	714	0	1146.3	97.6		A0A1D6CS38_WHEAT	Uncharacterized protein	SubName: Full=Uncharacterized protein {ECO:0000313|EnsemblPlants:TRIAE_CS42_7DL_TGACv1_604100_AA1993750.1};
TRINITY_DN194_c0_g2_i1	tr|A0A1D6AGF2|A0A1D6AGF2_WHEAT	689	2.6e-277	963.8	70.2		A0A1D6AGF2_WHEAT	Uncharacterized protein	SubName: Full=Uncharacterized protein {ECO:0000313|EnsemblPlants:TRIAE_CS42_6AS_TGACv1_485997_AA1555470.1};
TRINITY_DN177_c0_g1_i4	tr|A0A1D6AWS2|A0A1D6AWS2_WHEAT	224	5.9e-124	453.4	44		A0A1D6AWS2_WHEAT	Uncharacterized protein	SubName: Full=Uncharacterized protein {ECO:0000313|EnsemblPlants:TRIAE_CS42_6BS_TGACv1_513554_AA1644790.3};
TRINITY_DN177_c0_g1_i5	tr|A0A1D6AWS2|A0A1D6AWS2_WHEAT	224	5.5e-124	453.4	46.6		A0A1D6AWS2_WHEAT	Uncharacterized protein	SubName: Full=Uncharacterized protein {ECO:0000313|EnsemblPlants:TRIAE_CS42_6BS_TGACv1_513554_AA1644790.3};
TRINITY_DN177_c0_g1_i1	tr|W5HKQ4|W5HKQ4_WHEAT	227	1e-114	422.5	48.1		W5HKQ4_WHEAT	Uncharacterized protein	SubName: Full=Uncharacterized protein {ECO:0000313|EnsemblPlants:TRIAE_CS42_U_TGACv1_640786_AA2074420.1};
TRINITY_DN177_c0_g1_i6	tr|W5HKQ4|W5HKQ4_WHEAT	227	9.7e-115	422.5	51.2		W5HKQ4_WHEAT	Uncharacterized protein	SubName: Full=Uncharacterized protein {ECO:0000313|EnsemblPlants:TRIAE_CS42_U_TGACv1_640786_AA2074420.1};
TRINITY_DN177_c0_g1_i3	tr|A0A1D6AWS2|A0A1D6AWS2_WHEAT	224	5.5e-124	453.4	46.6		A0A1D6AWS2_WHEAT	Uncharacterized protein	SubName: Full=Uncharacterized protein {ECO:0000313|EnsemblPlants:TRIAE_CS42_6BS_TGACv1_513554_AA1644790.3};
TRINITY_DN177_c0_g1_i2	tr|A0A1D6AWS2|A0A1D6AWS2_WHEAT	224	4.5e-124	453.4	57.2		A0A1D6AWS2_WHEAT	Uncharacterized protein	SubName: Full=Uncharacterized protein {ECO:0000313|EnsemblPlants:TRIAE_CS42_6BS_TGACv1_513554_AA1644790.3};
TRINITY_DN177_c1_g1_i4	tr|A0A1D5UP19|A0A1D5UP19_WHEAT	34	7.6e-13	82.4	23.8		A0A1D5UP19_WHEAT	Uncharacterized protein	SubName: Full=Uncharacterized protein {ECO:0000313|EnsemblPlants:TRIAE_CS42_2DL_TGACv1_159605_AA0540480.1};
TRINITY_DN177_c1_g1_i6	tr|A0A1D5UP20|A0A1D5UP20_WHEAT	152	6.4e-66	260.4	34.2		A0A1D5UP20_WHEAT	Uncharacterized protein	SubName: Full=Uncharacterized protein {ECO:0000313|EnsemblPlants:TRIAE_CS42_2DL_TGACv1_159605_AA0540480.2};
TRINITY_DN177_c1_g1_i2	tr|A0A287IEG4|A0A287IEG4_HORVV	265	2.3e-129	471.1	61.9		A0A287IEG4_HORVV	Uncharacterized protein	SubName: Full=Uncharacterized protein {ECO:0000313|EnsemblPlants:HORVU2Hr1G071830.12};
TRINITY_DN177_c1_g1_i3	tr|A0A1D5UP20|A0A1D5UP20_WHEAT	230	4.5e-117	430.3	53.2		A0A1D5UP20_WHEAT	Uncharacterized protein	SubName: Full=Uncharacterized protein {ECO:0000313|EnsemblPlants:TRIAE_CS42_2DL_TGACv1_159605_AA0540480.2};
TRINITY_DN177_c1_g1_i1	tr|A0A287IEG1|A0A287IEG1_HORVV	222	3.8e-79	304.3	50.5		A0A287IEG1_HORVV	Uncharacterized protein	SubName: Full=Uncharacterized protein {ECO:0000313|EnsemblPlants:HORVU2Hr1G071830.9};
TRINITY_DN177_c1_g2_i1	tr|W5GCD4|W5GCD4_WHEAT	64	2.3e-32	146.4	83.5		W5GCD4_WHEAT	Uncharacterized protein	SubName: Full=Uncharacterized protein {ECO:0000313|EnsemblPlants:TRIAE_CS42_6AS_TGACv1_485219_AA1540440.1};
TRINITY_DN184_c0_g1_i8	tr|A0A1D6AKY0|A0A1D6AKY0_WHEAT	1775	0	3362	75.7		A0A1D6AKY0_WHEAT	Uncharacterized protein	SubName: Full=Uncharacterized protein {ECO:0000313|EnsemblPlants:TRIAE_CS42_6BL_TGACv1_499492_AA1584190.2};
TRINITY_DN184_c0_g1_i6	tr|A0A287PBU4|A0A287PBU4_HORVV	274	1e-92	349.4	61.2		A0A287PBU4_HORVV	Uncharacterized protein	SubName: Full=Uncharacterized protein {ECO:0000313|EnsemblPlants:HORVU4Hr1G063190.1};
TRINITY_DN184_c0_g1_i5	tr|A0A1D6AKY0|A0A1D6AKY0_WHEAT	1775	0	3362	72.5		A0A1D6AKY0_WHEAT	Uncharacterized protein	SubName: Full=Uncharacterized protein {ECO:0000313|EnsemblPlants:TRIAE_CS42_6BL_TGACv1_499492_AA1584190.2};
TRINITY_DN184_c0_g1_i4	tr|A0A1D6AKY0|A0A1D6AKY0_WHEAT	1775	0	3362	70.3		A0A1D6AKY0_WHEAT	Uncharacterized protein	SubName: Full=Uncharacterized protein {ECO:0000313|EnsemblPlants:TRIAE_CS42_6BL_TGACv1_499492_AA1584190.2};
TRINITY_DN184_c0_g1_i2	tr|A0A287PBU4|A0A287PBU4_HORVV	122	3.4e-32	147.9	36.6		A0A287PBU4_HORVV	Uncharacterized protein	SubName: Full=Uncharacterized protein {ECO:0000313|EnsemblPlants:HORVU4Hr1G063190.1};
TRINITY_DN184_c0_g1_i3	tr|A0A1D6AKY0|A0A1D6AKY0_WHEAT	1775	0	3362	72.6		A0A1D6AKY0_WHEAT	Uncharacterized protein	SubName: Full=Uncharacterized protein {ECO:0000313|EnsemblPlants:TRIAE_CS42_6BL_TGACv1_499492_AA1584190.2};
TRINITY_DN184_c0_g2_i1	tr|A0A1D5ZDV3|A0A1D5ZDV3_WHEAT	172	1.3e-86	328.6	57		A0A1D5ZDV3_WHEAT	Uncharacterized protein	SubName: Full=Uncharacterized protein {ECO:0000313|EnsemblPlants:TRIAE_CS42_5BL_TGACv1_413043_AA1367940.1};
TRINITY_DN184_c2_g1_i1	tr|A0A1D5SWH3|A0A1D5SWH3_WHEAT	46	0.00012	55.1	34.2		A0A1D5SWH3_WHEAT	Uncharacterized protein	SubName: Full=Uncharacterized protein {ECO:0000313|EnsemblPlants:TRIAE_CS42_1DL_TGACv1_062564_AA0216620.3};
TRINITY_DN184_c2_g1_i3	tr|A0A1D5SWH3|A0A1D5SWH3_WHEAT	46	0.00012	55.1	34.3		A0A1D5SWH3_WHEAT	Uncharacterized protein	SubName: Full=Uncharacterized protein {ECO:0000313|EnsemblPlants:TRIAE_CS42_1DL_TGACv1_062564_AA0216620.3};
TRINITY_DN167_c0_g1_i5	tr|W5EEC3|W5EEC3_WHEAT	501	1.1e-283	984.2	85.8		W5EEC3_WHEAT	Uncharacterized protein	SubName: Full=Uncharacterized protein {ECO:0000313|EnsemblPlants:TRIAE_CS42_4BS_TGACv1_328596_AA1090810.1};
TRINITY_DN167_c0_g1_i1	tr|M7ZBF0|M7ZBF0_TRIUA	196	2.4e-105	390.2	99.5	ORFNames=TRIUR3_33452 {ECO:0000313|EMBL:EMS49735.1};	M7ZBF0_TRIUA	Cytochrome P450 76C4	SubName: Full=Cytochrome P450 76C4 {ECO:0000313|EMBL:EMS49735.1, ECO:0000313|EnsemblPlants:TRIUR3_33452-P1};
TRINITY_DN167_c0_g1_i6	tr|W5EEC3|W5EEC3_WHEAT	501	1.2e-283	984.2	75.7		W5EEC3_WHEAT	Uncharacterized protein	SubName: Full=Uncharacterized protein {ECO:0000313|EnsemblPlants:TRIAE_CS42_4BS_TGACv1_328596_AA1090810.1};
TRINITY_DN167_c0_g1_i8	tr|N1QTH0|N1QTH0_AEGTA	196	4.9e-103	382.5	99.5	ORFNames=F775_07644 {ECO:0000313|EMBL:EMT03552.1};	N1QTH0_AEGTA	Cytochrome P450 76C4	SubName: Full=Cytochrome P450 76C4 {ECO:0000313|EMBL:EMT03552.1, ECO:0000313|EnsemblPlants:EMT03552};
TRINITY_DN167_c0_g1_i2	tr|A0A1D6D4F9|A0A1D6D4F9_WHEAT	207	4.2e-111	409.8	72.4		A0A1D6D4F9_WHEAT	Uncharacterized protein	SubName: Full=Uncharacterized protein {ECO:0000313|EnsemblPlants:TRIAE_CS42_7DS_TGACv1_623929_AA2057530.1};
TRINITY_DN167_c0_g1_i4	tr|A0A1D6BWN5|A0A1D6BWN5_WHEAT	499	4.8e-279	968.8	85.7		A0A1D6BWN5_WHEAT	Uncharacterized protein	SubName: Full=Uncharacterized protein {ECO:0000313|EnsemblPlants:TRIAE_CS42_7AS_TGACv1_570037_AA1829190.1};
TRINITY_DN151_c0_g1_i2	tr|A0A1D6APA5|A0A1D6APA5_WHEAT	360	7e-220	771.9	75.3		A0A1D6APA5_WHEAT	Uncharacterized protein	SubName: Full=Uncharacterized protein {ECO:0000313|EnsemblPlants:TRIAE_CS42_6BL_TGACv1_500306_AA1602900.1};
TRINITY_DN151_c0_g1_i1	tr|A0A1D6APA5|A0A1D6APA5_WHEAT	360	5.3e-220	772.3	76.4		A0A1D6APA5_WHEAT	Uncharacterized protein	SubName: Full=Uncharacterized protein {ECO:0000313|EnsemblPlants:TRIAE_CS42_6BL_TGACv1_500306_AA1602900.1};
TRINITY_DN151_c0_g1_i3	tr|A0A1D6APA5|A0A1D6APA5_WHEAT	360	6.8e-220	771.9	77.9		A0A1D6APA5_WHEAT	Uncharacterized protein	SubName: Full=Uncharacterized protein {ECO:0000313|EnsemblPlants:TRIAE_CS42_6BL_TGACv1_500306_AA1602900.1};
TRINITY_DN193_c0_g1_i7	tr|A0A1D5Z9Q3|A0A1D5Z9Q3_WHEAT	268	2.4e-144	520.8	64.8		A0A1D5Z9Q3_WHEAT	Derlin	RecName: Full=Derlin {ECO:0000256|RuleBase:RU363059};
TRINITY_DN193_c0_g1_i6	tr|A0A1D5Z9Q3|A0A1D5Z9Q3_WHEAT	268	3.2e-144	520.4	64.7		A0A1D5Z9Q3_WHEAT	Derlin	RecName: Full=Derlin {ECO:0000256|RuleBase:RU363059};
TRINITY_DN193_c0_g1_i11	tr|A0A1D5Z9Q3|A0A1D5Z9Q3_WHEAT	113	2.6e-53	217.6	46.4		A0A1D5Z9Q3_WHEAT	Derlin	RecName: Full=Derlin {ECO:0000256|RuleBase:RU363059};
TRINITY_DN193_c0_g1_i9	tr|A0A1D5Z9Q3|A0A1D5Z9Q3_WHEAT	87	7.1e-35	156.4	35.4		A0A1D5Z9Q3_WHEAT	Derlin	RecName: Full=Derlin {ECO:0000256|RuleBase:RU363059};
TRINITY_DN193_c0_g1_i4	tr|A0A1D5Z9Q3|A0A1D5Z9Q3_WHEAT	294	1.2e-162	581.6	71.4		A0A1D5Z9Q3_WHEAT	Derlin	RecName: Full=Derlin {ECO:0000256|RuleBase:RU363059};
TRINITY_DN193_c0_g1_i2	tr|A0A1D5Z9Q3|A0A1D5Z9Q3_WHEAT	294	8.8e-163	582	71.5		A0A1D5Z9Q3_WHEAT	Derlin	RecName: Full=Derlin {ECO:0000256|RuleBase:RU363059};
TRINITY_DN193_c0_g1_i12	tr|A0A1D5Z9Q3|A0A1D5Z9Q3_WHEAT	259	1.7e-142	514.6	63.4		A0A1D5Z9Q3_WHEAT	Derlin	RecName: Full=Derlin {ECO:0000256|RuleBase:RU363059};
TRINITY_DN193_c0_g1_i5	tr|A0A1D5Z9Q3|A0A1D5Z9Q3_WHEAT	295	2.2e-161	577.4	71.4		A0A1D5Z9Q3_WHEAT	Derlin	RecName: Full=Derlin {ECO:0000256|RuleBase:RU363059};
TRINITY_DN193_c0_g1_i1	tr|A0A1D5Z9Q3|A0A1D5Z9Q3_WHEAT	295	2.2e-161	577.4	71		A0A1D5Z9Q3_WHEAT	Derlin	RecName: Full=Derlin {ECO:0000256|RuleBase:RU363059};
TRINITY_DN193_c0_g1_i10	tr|A0A1D5Z9Q3|A0A1D5Z9Q3_WHEAT	259	2.3e-142	514.2	63.3		A0A1D5Z9Q3_WHEAT	Derlin	RecName: Full=Derlin {ECO:0000256|RuleBase:RU363059};
TRINITY_DN193_c0_g1_i3	tr|A0A1D5Z9Q3|A0A1D5Z9Q3_WHEAT	78	5e-33	150.2	32.4		A0A1D5Z9Q3_WHEAT	Derlin	RecName: Full=Derlin {ECO:0000256|RuleBase:RU363059};
TRINITY_DN193_c0_g2_i1	tr|M1BD25|M1BD25_SOLTU	52	4.6e-18	100.9	16.3	Name=102591449 {ECO:0000313|EnsemblPlants:PGSC0003DMT400042450};	M1BD25_SOLTU	Uncharacterized protein	SubName: Full=Uncharacterized protein {ECO:0000313|EnsemblPlants:PGSC0003DMT400042450};
TRINITY_DN143_c0_g1_i1	tr|M8A257|M8A257_TRIUA	305	5.4e-166	592.8	68.3	ORFNames=TRIUR3_12527 {ECO:0000313|EMBL:EMS54484.1};	M8A257_TRIUA	Peroxidase	RecName: Full=Peroxidase {ECO:0000256|RuleBase:RU362060, ECO:0000256|SAAS:SAAS00709852}; EC=1.11.1.7 {ECO:0000256|RuleBase:RU362060, ECO:0000256|SAAS:SAAS00709852};
TRINITY_DN143_c0_g1_i3	tr|M8AS66|M8AS66_AEGTA	273	1.8e-150	541.2	65.2	ORFNames=F775_09652 {ECO:0000313|EMBL:EMT04570.1};	M8AS66_AEGTA	Peroxidase	RecName: Full=Peroxidase {ECO:0000256|RuleBase:RU362060, ECO:0000256|SAAS:SAAS00709852}; EC=1.11.1.7 {ECO:0000256|RuleBase:RU362060, ECO:0000256|SAAS:SAAS00709852};
TRINITY_DN143_c0_g1_i8	tr|A0A1D6CN27|A0A1D6CN27_WHEAT	305	1e-167	598.6	66.6		A0A1D6CN27_WHEAT	Peroxidase	RecName: Full=Peroxidase {ECO:0000256|RuleBase:RU362060, ECO:0000256|SAAS:SAAS00709852}; EC=1.11.1.7 {ECO:0000256|RuleBase:RU362060, ECO:0000256|SAAS:SAAS00709852};
TRINITY_DN143_c0_g1_i6	tr|A0A1D6CN27|A0A1D6CN27_WHEAT	305	2.3e-167	597.4	66.6		A0A1D6CN27_WHEAT	Peroxidase	RecName: Full=Peroxidase {ECO:0000256|RuleBase:RU362060, ECO:0000256|SAAS:SAAS00709852}; EC=1.11.1.7 {ECO:0000256|RuleBase:RU362060, ECO:0000256|SAAS:SAAS00709852};
TRINITY_DN143_c0_g1_i2	tr|M8A257|M8A257_TRIUA	305	6e-165	589.3	68.3	ORFNames=TRIUR3_12527 {ECO:0000313|EMBL:EMS54484.1};	M8A257_TRIUA	Peroxidase	RecName: Full=Peroxidase {ECO:0000256|RuleBase:RU362060, ECO:0000256|SAAS:SAAS00709852}; EC=1.11.1.7 {ECO:0000256|RuleBase:RU362060, ECO:0000256|SAAS:SAAS00709852};
TRINITY_DN143_c0_g1_i4	tr|A0A1D6C353|A0A1D6C353_WHEAT	305	1e-164	588.6	68.4		A0A1D6C353_WHEAT	Peroxidase	RecName: Full=Peroxidase {ECO:0000256|RuleBase:RU362060, ECO:0000256|SAAS:SAAS00709852}; EC=1.11.1.7 {ECO:0000256|RuleBase:RU362060, ECO:0000256|SAAS:SAAS00709852};
TRINITY_DN143_c0_g1_i7	tr|M8AS66|M8AS66_AEGTA	269	7e-145	522.7	59.2	ORFNames=F775_09652 {ECO:0000313|EMBL:EMT04570.1};	M8AS66_AEGTA	Peroxidase	RecName: Full=Peroxidase {ECO:0000256|RuleBase:RU362060, ECO:0000256|SAAS:SAAS00709852}; EC=1.11.1.7 {ECO:0000256|RuleBase:RU362060, ECO:0000256|SAAS:SAAS00709852};
TRINITY_DN143_c0_g1_i5	tr|A0A1D6C353|A0A1D6C353_WHEAT	305	3.8e-167	596.7	68.4		A0A1D6C353_WHEAT	Peroxidase	RecName: Full=Peroxidase {ECO:0000256|RuleBase:RU362060, ECO:0000256|SAAS:SAAS00709852}; EC=1.11.1.7 {ECO:0000256|RuleBase:RU362060, ECO:0000256|SAAS:SAAS00709852};
TRINITY_DN143_c0_g2_i1	tr|C6ETA3|C6ETA3_WHEAT	75	2e-33	149.8	99.1	Name=Prx112-M {ECO:0000313|EMBL:ACF08082.1};	C6ETA3_WHEAT	Peroxidase	RecName: Full=Peroxidase {ECO:0000256|RuleBase:RU362060, ECO:0000256|SAAS:SAAS00709852}; EC=1.11.1.7 {ECO:0000256|RuleBase:RU362060, ECO:0000256|SAAS:SAAS00709852};
TRINITY_DN143_c1_g1_i1	tr|A0A1D6CW20|A0A1D6CW20_WHEAT	150	6.9e-81	308.5	99.6		A0A1D6CW20_WHEAT	Peroxidase	RecName: Full=Peroxidase {ECO:0000256|RuleBase:RU362060, ECO:0000256|SAAS:SAAS00709852}; EC=1.11.1.7 {ECO:0000256|RuleBase:RU362060, ECO:0000256|SAAS:SAAS00709852};
TRINITY_DN143_c1_g1_i3	tr|A0A1D5WYS2|A0A1D5WYS2_WHEAT	157	3.1e-84	319.7	99.4		A0A1D5WYS2_WHEAT	Peroxidase	RecName: Full=Peroxidase {ECO:0000256|RuleBase:RU362060, ECO:0000256|SAAS:SAAS00709852}; EC=1.11.1.7 {ECO:0000256|RuleBase:RU362060, ECO:0000256|SAAS:SAAS00709852};
TRINITY_DN143_c1_g1_i2	tr|A0A1D5WYS2|A0A1D5WYS2_WHEAT	157	3.1e-84	319.7	99.4		A0A1D5WYS2_WHEAT	Peroxidase	RecName: Full=Peroxidase {ECO:0000256|RuleBase:RU362060, ECO:0000256|SAAS:SAAS00709852}; EC=1.11.1.7 {ECO:0000256|RuleBase:RU362060, ECO:0000256|SAAS:SAAS00709852};
TRINITY_DN143_c2_g1_i1	tr|Q43220|Q43220_WHEAT	141	6.8e-71	275.8	68.6	Name=pox4 {ECO:0000313|EMBL:CAA59487.1}; Synonyms=Prx114-A {ECO:0000313|EMBL:ACF08093.1};	Q43220_WHEAT	Peroxidase	RecName: Full=Peroxidase {ECO:0000256|RuleBase:RU362060, ECO:0000256|SAAS:SAAS00709852}; EC=1.11.1.7 {ECO:0000256|RuleBase:RU362060, ECO:0000256|SAAS:SAAS00709852};
TRINITY_DN143_c2_g1_i2	tr|W5BIK9|W5BIK9_WHEAT	141	4.4e-70	273.1	68.3		W5BIK9_WHEAT	Peroxidase	RecName: Full=Peroxidase {ECO:0000256|RuleBase:RU362060, ECO:0000256|SAAS:SAAS00709852}; EC=1.11.1.7 {ECO:0000256|RuleBase:RU362060, ECO:0000256|SAAS:SAAS00709852};
TRINITY_DN196_c0_g1_i2	tr|A0A1D5WYZ9|A0A1D5WYZ9_WHEAT	681	0	1285	79.9		A0A1D5WYZ9_WHEAT	Uncharacterized protein	SubName: Full=Uncharacterized protein {ECO:0000313|EnsemblPlants:TRIAE_CS42_4AL_TGACv1_288382_AA0947100.1};
TRINITY_DN196_c0_g1_i4	tr|A0A1D5WYZ9|A0A1D5WYZ9_WHEAT	681	0	1280	80.5		A0A1D5WYZ9_WHEAT	Uncharacterized protein	SubName: Full=Uncharacterized protein {ECO:0000313|EnsemblPlants:TRIAE_CS42_4AL_TGACv1_288382_AA0947100.1};
TRINITY_DN196_c1_g1_i4	tr|W5FPF4|W5FPF4_WHEAT	136	7.5e-55	224.9	12.1		W5FPF4_WHEAT	Uncharacterized protein	SubName: Full=Uncharacterized protein {ECO:0000313|EnsemblPlants:TRIAE_CS42_5BS_TGACv1_423317_AA1374140.1};
TRINITY_DN196_c1_g1_i9	tr|W5FPF4|W5FPF4_WHEAT	112	4.1e-48	202.6	9.6		W5FPF4_WHEAT	Uncharacterized protein	SubName: Full=Uncharacterized protein {ECO:0000313|EnsemblPlants:TRIAE_CS42_5BS_TGACv1_423317_AA1374140.1};
TRINITY_DN196_c1_g1_i1	tr|A0A1D6CFH3|A0A1D6CFH3_WHEAT	126	2.2e-69	272.7	16		A0A1D6CFH3_WHEAT	Uncharacterized protein	SubName: Full=Uncharacterized protein {ECO:0000313|EnsemblPlants:TRIAE_CS42_7BS_TGACv1_592203_AA1933130.3};
TRINITY_DN196_c1_g1_i18	tr|A0A1D6CFH3|A0A1D6CFH3_WHEAT	126	2.2e-69	272.7	16.1		A0A1D6CFH3_WHEAT	Uncharacterized protein	SubName: Full=Uncharacterized protein {ECO:0000313|EnsemblPlants:TRIAE_CS42_7BS_TGACv1_592203_AA1933130.3};
TRINITY_DN196_c1_g1_i14	tr|A0A1D6CFH3|A0A1D6CFH3_WHEAT	246	8.2e-146	526.2	41.9		A0A1D6CFH3_WHEAT	Uncharacterized protein	SubName: Full=Uncharacterized protein {ECO:0000313|EnsemblPlants:TRIAE_CS42_7BS_TGACv1_592203_AA1933130.3};
TRINITY_DN196_c1_g1_i15	tr|R7WE19|R7WE19_AEGTA	175	1.1e-65	260	27.9	ORFNames=F775_11977 {ECO:0000313|EMBL:EMT20678.1};	R7WE19_AEGTA	Annexin	RecName: Full=Annexin {ECO:0000256|RuleBase:RU003540};
TRINITY_DN196_c1_g1_i8	tr|W5FPF4|W5FPF4_WHEAT	112	5.2e-48	202.2	10		W5FPF4_WHEAT	Uncharacterized protein	SubName: Full=Uncharacterized protein {ECO:0000313|EnsemblPlants:TRIAE_CS42_5BS_TGACv1_423317_AA1374140.1};
TRINITY_DN196_c1_g1_i19	tr|A0A077S784|A0A077S784_WHEAT	186	9.8e-63	251.1	16.5	ORFNames=TRAES_3BF010700010CFD_c1 {ECO:0000313|EMBL:CDM85890.1};	A0A077S784_WHEAT	Uncharacterized protein	SubName: Full=Uncharacterized protein {ECO:0000313|EMBL:CDM85890.1};
TRINITY_DN196_c1_g1_i13	tr|A0A1D6CFH3|A0A1D6CFH3_WHEAT	351	6.1e-213	749.2	58.7		A0A1D6CFH3_WHEAT	Uncharacterized protein	SubName: Full=Uncharacterized protein {ECO:0000313|EnsemblPlants:TRIAE_CS42_7BS_TGACv1_592203_AA1933130.3};
TRINITY_DN196_c1_g1_i20	tr|W5FPF4|W5FPF4_WHEAT	136	7.8e-55	224.9	11.6		W5FPF4_WHEAT	Uncharacterized protein	SubName: Full=Uncharacterized protein {ECO:0000313|EnsemblPlants:TRIAE_CS42_5BS_TGACv1_423317_AA1374140.1};
TRINITY_DN196_c1_g1_i12	tr|A0A1D6CFH3|A0A1D6CFH3_WHEAT	126	2.2e-69	272.7	16		A0A1D6CFH3_WHEAT	Uncharacterized protein	SubName: Full=Uncharacterized protein {ECO:0000313|EnsemblPlants:TRIAE_CS42_7BS_TGACv1_592203_AA1933130.3};
TRINITY_DN196_c1_g1_i7	tr|A0A1D6CFH3|A0A1D6CFH3_WHEAT	126	2.2e-69	272.7	16.1		A0A1D6CFH3_WHEAT	Uncharacterized protein	SubName: Full=Uncharacterized protein {ECO:0000313|EnsemblPlants:TRIAE_CS42_7BS_TGACv1_592203_AA1933130.3};
TRINITY_DN196_c1_g1_i11	tr|A0A1D6CFH3|A0A1D6CFH3_WHEAT	126	2.2e-69	272.7	16.1		A0A1D6CFH3_WHEAT	Uncharacterized protein	SubName: Full=Uncharacterized protein {ECO:0000313|EnsemblPlants:TRIAE_CS42_7BS_TGACv1_592203_AA1933130.3};
TRINITY_DN196_c1_g1_i16	tr|W5FPF4|W5FPF4_WHEAT	111	2.7e-47	199.1	15.9		W5FPF4_WHEAT	Uncharacterized protein	SubName: Full=Uncharacterized protein {ECO:0000313|EnsemblPlants:TRIAE_CS42_5BS_TGACv1_423317_AA1374140.1};
TRINITY_DN196_c1_g1_i2	tr|W5FPF4|W5FPF4_WHEAT	141	2.8e-58	235.7	18.9		W5FPF4_WHEAT	Uncharacterized protein	SubName: Full=Uncharacterized protein {ECO:0000313|EnsemblPlants:TRIAE_CS42_5BS_TGACv1_423317_AA1374140.1};
TRINITY_DN196_c1_g1_i21	tr|W5FPF4|W5FPF4_WHEAT	112	1.6e-48	202.2	32.7		W5FPF4_WHEAT	Uncharacterized protein	SubName: Full=Uncharacterized protein {ECO:0000313|EnsemblPlants:TRIAE_CS42_5BS_TGACv1_423317_AA1374140.1};
TRINITY_DN196_c1_g1_i3	tr|W5FPF4|W5FPF4_WHEAT	136	5.7e-55	224.9	16		W5FPF4_WHEAT	Uncharacterized protein	SubName: Full=Uncharacterized protein {ECO:0000313|EnsemblPlants:TRIAE_CS42_5BS_TGACv1_423317_AA1374140.1};
TRINITY_DN122_c0_g1_i7	tr|A0A1D5WHQ5|A0A1D5WHQ5_WHEAT	447	9.5e-99	369.8	77.6		A0A1D5WHQ5_WHEAT	Uncharacterized protein	SubName: Full=Uncharacterized protein {ECO:0000313|EnsemblPlants:TRIAE_CS42_3DL_TGACv1_250135_AA0862760.1};
TRINITY_DN122_c0_g1_i2	tr|A0A1D5WHQ5|A0A1D5WHQ5_WHEAT	451	4.3e-99	370.9	77.7		A0A1D5WHQ5_WHEAT	Uncharacterized protein	SubName: Full=Uncharacterized protein {ECO:0000313|EnsemblPlants:TRIAE_CS42_3DL_TGACv1_250135_AA0862760.1};
TRINITY_DN122_c0_g1_i6	tr|A0A1D5WHQ5|A0A1D5WHQ5_WHEAT	459	8.1e-130	473	77.9		A0A1D5WHQ5_WHEAT	Uncharacterized protein	SubName: Full=Uncharacterized protein {ECO:0000313|EnsemblPlants:TRIAE_CS42_3DL_TGACv1_250135_AA0862760.1};
TRINITY_DN122_c0_g1_i8	tr|G8GWG4|G8GWG4_WHEAT	206	3.2e-83	318.2	36.7		G8GWG4_WHEAT	MYB13-2	SubName: Full=MYB13-2 {ECO:0000313|EMBL:AER38258.1};
TRINITY_DN122_c0_g1_i9	tr|G8GWG4|G8GWG4_WHEAT	206	5.6e-83	317	47.3		G8GWG4_WHEAT	MYB13-2	SubName: Full=MYB13-2 {ECO:0000313|EMBL:AER38258.1};
TRINITY_DN122_c0_g1_i4	tr|A0A1D5WHQ5|A0A1D5WHQ5_WHEAT	454	2.8e-98	368.2	77.8		A0A1D5WHQ5_WHEAT	Uncharacterized protein	SubName: Full=Uncharacterized protein {ECO:0000313|EnsemblPlants:TRIAE_CS42_3DL_TGACv1_250135_AA0862760.1};
TRINITY_DN122_c0_g1_i5	tr|A0A1D5WHQ5|A0A1D5WHQ5_WHEAT	451	7.5e-99	369.8	99.7		A0A1D5WHQ5_WHEAT	Uncharacterized protein	SubName: Full=Uncharacterized protein {ECO:0000313|EnsemblPlants:TRIAE_CS42_3DL_TGACv1_250135_AA0862760.1};
TRINITY_DN122_c0_g1_i1	tr|A0A1D5WHQ5|A0A1D5WHQ5_WHEAT	465	2.4e-129	471.5	78.1		A0A1D5WHQ5_WHEAT	Uncharacterized protein	SubName: Full=Uncharacterized protein {ECO:0000313|EnsemblPlants:TRIAE_CS42_3DL_TGACv1_250135_AA0862760.1};
TRINITY_DN122_c0_g2_i2	tr|A0A1D5T338|A0A1D5T338_WHEAT	191	1.2e-78	302	66		A0A1D5T338_WHEAT	Uncharacterized protein	SubName: Full=Uncharacterized protein {ECO:0000313|EnsemblPlants:TRIAE_CS42_1DS_TGACv1_080729_AA0252890.1};
TRINITY_DN122_c0_g2_i3	tr|A0A1D5T338|A0A1D5T338_WHEAT	92	2.5e-42	181.4	31.2		A0A1D5T338_WHEAT	Uncharacterized protein	SubName: Full=Uncharacterized protein {ECO:0000313|EnsemblPlants:TRIAE_CS42_1DS_TGACv1_080729_AA0252890.1};
TRINITY_DN122_c0_g2_i1	tr|A0A1D5SJY2|A0A1D5SJY2_WHEAT	73	9.4e-34	152.9	25		A0A1D5SJY2_WHEAT	Uncharacterized protein	SubName: Full=Uncharacterized protein {ECO:0000313|EnsemblPlants:TRIAE_CS42_1BS_TGACv1_049635_AA0158560.1};
TRINITY_DN122_c1_g1_i2	tr|W4ZMP7|W4ZMP7_WHEAT	72	8.3e-36	157.9	86.7		W4ZMP7_WHEAT	Uncharacterized protein	SubName: Full=Uncharacterized protein {ECO:0000313|EnsemblPlants:TRIAE_CS42_1AL_TGACv1_002296_AA0040650.1};
TRINITY_DN122_c1_g1_i6	tr|A0A1D5S800|A0A1D5S800_WHEAT	70	9.5e-36	158.7	43.5	Name=PIMP1 {ECO:0000313|EMBL:AQA28692.1};	A0A1D5S800_WHEAT	R2R3-type MYB protein	SubName: Full=R2R3-type MYB protein {ECO:0000313|EMBL:AQA28692.1};
TRINITY_DN122_c1_g1_i3	tr|A0A1D5S800|A0A1D5S800_WHEAT	70	4.9e-36	158.7	84	Name=PIMP1 {ECO:0000313|EMBL:AQA28692.1};	A0A1D5S800_WHEAT	R2R3-type MYB protein	SubName: Full=R2R3-type MYB protein {ECO:0000313|EMBL:AQA28692.1};
TRINITY_DN122_c1_g1_i5	tr|A0A287GE58|A0A287GE58_HORVV	76	8.1e-10	72	67.5		A0A287GE58_HORVV	Uncharacterized protein	SubName: Full=Uncharacterized protein {ECO:0000313|EnsemblPlants:HORVU1Hr1G079030.3};
TRINITY_DN122_c1_g1_i1	tr|A0A287GE58|A0A287GE58_HORVV	71	7.5e-11	75.5	59.1		A0A287GE58_HORVV	Uncharacterized protein	SubName: Full=Uncharacterized protein {ECO:0000313|EnsemblPlants:HORVU1Hr1G079030.3};
TRINITY_DN122_c1_g1_i4	tr|T1NDN0|T1NDN0_TRIUA	30	7e-06	58.9	27.2		T1NDN0_TRIUA	Uncharacterized protein	SubName: Full=Uncharacterized protein {ECO:0000313|EnsemblPlants:TRIUR3_28659-P1};
TRINITY_DN186_c0_g1_i1	tr|A0A1D6D1V0|A0A1D6D1V0_WHEAT	290	2.4e-106	394.8	58		A0A1D6D1V0_WHEAT	Uncharacterized protein	SubName: Full=Uncharacterized protein {ECO:0000313|EnsemblPlants:TRIAE_CS42_7DS_TGACv1_622808_AA2045580.1};
TRINITY_DN186_c0_g1_i11	tr|A0A1D6BXI4|A0A1D6BXI4_WHEAT	171	3.8e-93	349.7	80.3		A0A1D6BXI4_WHEAT	Uncharacterized protein	SubName: Full=Uncharacterized protein {ECO:0000313|EnsemblPlants:TRIAE_CS42_7AS_TGACv1_570310_AA1833740.1};
TRINITY_DN186_c0_g1_i7	tr|A0A1D6D1V0|A0A1D6D1V0_WHEAT	171	1.2e-86	329.3	34.8		A0A1D6D1V0_WHEAT	Uncharacterized protein	SubName: Full=Uncharacterized protein {ECO:0000313|EnsemblPlants:TRIAE_CS42_7DS_TGACv1_622808_AA2045580.1};
TRINITY_DN186_c0_g1_i4	tr|A0A1D6D1V0|A0A1D6D1V0_WHEAT	291	2.7e-102	381.3	60.4		A0A1D6D1V0_WHEAT	Uncharacterized protein	SubName: Full=Uncharacterized protein {ECO:0000313|EnsemblPlants:TRIAE_CS42_7DS_TGACv1_622808_AA2045580.1};
TRINITY_DN186_c0_g1_i3	tr|A0A1D6D1V0|A0A1D6D1V0_WHEAT	295	1.3e-97	365.2	91.2		A0A1D6D1V0_WHEAT	Uncharacterized protein	SubName: Full=Uncharacterized protein {ECO:0000313|EnsemblPlants:TRIAE_CS42_7DS_TGACv1_622808_AA2045580.1};
TRINITY_DN186_c0_g1_i6	tr|A0A1D6D1V0|A0A1D6D1V0_WHEAT	290	2.4e-106	394.8	58.1		A0A1D6D1V0_WHEAT	Uncharacterized protein	SubName: Full=Uncharacterized protein {ECO:0000313|EnsemblPlants:TRIAE_CS42_7DS_TGACv1_622808_AA2045580.1};
TRINITY_DN186_c0_g1_i12	tr|A0A1D6D1V0|A0A1D6D1V0_WHEAT	290	2.4e-106	394.8	57.6		A0A1D6D1V0_WHEAT	Uncharacterized protein	SubName: Full=Uncharacterized protein {ECO:0000313|EnsemblPlants:TRIAE_CS42_7DS_TGACv1_622808_AA2045580.1};
TRINITY_DN186_c0_g1_i2	tr|A0A1D6D1V0|A0A1D6D1V0_WHEAT	171	1.1e-86	329.3	37.7		A0A1D6D1V0_WHEAT	Uncharacterized protein	SubName: Full=Uncharacterized protein {ECO:0000313|EnsemblPlants:TRIAE_CS42_7DS_TGACv1_622808_AA2045580.1};
TRINITY_DN186_c0_g1_i8	tr|A0A1D6D1V0|A0A1D6D1V0_WHEAT	290	2.6e-106	394.8	53.9		A0A1D6D1V0_WHEAT	Uncharacterized protein	SubName: Full=Uncharacterized protein {ECO:0000313|EnsemblPlants:TRIAE_CS42_7DS_TGACv1_622808_AA2045580.1};
TRINITY_DN186_c0_g1_i5	tr|A0A1D6BXI4|A0A1D6BXI4_WHEAT	249	5.7e-111	410.2	49.1		A0A1D6BXI4_WHEAT	Uncharacterized protein	SubName: Full=Uncharacterized protein {ECO:0000313|EnsemblPlants:TRIAE_CS42_7AS_TGACv1_570310_AA1833740.1};
TRINITY_DN186_c0_g1_i9	tr|A0A1D6BXI4|A0A1D6BXI4_WHEAT	249	5.7e-111	410.2	49		A0A1D6BXI4_WHEAT	Uncharacterized protein	SubName: Full=Uncharacterized protein {ECO:0000313|EnsemblPlants:TRIAE_CS42_7AS_TGACv1_570310_AA1833740.1};
TRINITY_DN186_c0_g1_i10	tr|A0A1D6BXI4|A0A1D6BXI4_WHEAT	249	6.1e-111	410.2	45.5		A0A1D6BXI4_WHEAT	Uncharacterized protein	SubName: Full=Uncharacterized protein {ECO:0000313|EnsemblPlants:TRIAE_CS42_7AS_TGACv1_570310_AA1833740.1};
TRINITY_DN186_c0_g2_i1	tr|A0A1D6BXI4|A0A1D6BXI4_WHEAT	51	1.1e-20	108.6	33.1		A0A1D6BXI4_WHEAT	Uncharacterized protein	SubName: Full=Uncharacterized protein {ECO:0000313|EnsemblPlants:TRIAE_CS42_7AS_TGACv1_570310_AA1833740.1};
TRINITY_DN186_c0_g3_i1	tr|A0A1D6CY34|A0A1D6CY34_WHEAT	45	8.5e-17	94.7	54.4		A0A1D6CY34_WHEAT	Uncharacterized protein	SubName: Full=Uncharacterized protein {ECO:0000313|EnsemblPlants:TRIAE_CS42_7DS_TGACv1_621779_AA2025840.1};
TRINITY_DN139_c0_g1_i2	tr|N1QUD9|N1QUD9_AEGTA	553	0	1153.7	86.9	ORFNames=F775_26435 {ECO:0000313|EMBL:EMT02825.1};	N1QUD9_AEGTA	L-ascorbate oxidase-like protein	SubName: Full=L-ascorbate oxidase-like protein {ECO:0000313|EMBL:EMT02825.1, ECO:0000313|EnsemblPlants:EMT02825};
TRINITY_DN139_c0_g1_i1	tr|W5CUG0|W5CUG0_WHEAT	553	0	1068.9	61	ORFNames=TRAES_3BF094400110CFD_c1 {ECO:0000313|EMBL:CDM84722.1};	W5CUG0_WHEAT	Uncharacterized protein	SubName: Full=Uncharacterized protein {ECO:0000313|EMBL:CDM84722.1, ECO:0000313|EnsemblPlants:TRIAE_CS42_3B_TGACv1_221154_AA0731980.1};
TRINITY_DN139_c0_g1_i3	tr|W5CUG0|W5CUG0_WHEAT	553	0	1068.9	78	ORFNames=TRAES_3BF094400110CFD_c1 {ECO:0000313|EMBL:CDM84722.1};	W5CUG0_WHEAT	Uncharacterized protein	SubName: Full=Uncharacterized protein {ECO:0000313|EMBL:CDM84722.1, ECO:0000313|EnsemblPlants:TRIAE_CS42_3B_TGACv1_221154_AA0731980.1};
TRINITY_DN139_c0_g1_i6	tr|A0A1D5RRJ0|A0A1D5RRJ0_WHEAT	63	4e-27	131	20.7		A0A1D5RRJ0_WHEAT	Uncharacterized protein	SubName: Full=Uncharacterized protein {ECO:0000313|EnsemblPlants:TRIAE_CS42_1AL_TGACv1_000548_AA0014440.2};
TRINITY_DN139_c0_g1_i5	tr|A0A1D5SSU4|A0A1D5SSU4_WHEAT	323	1.5e-186	660.6	99.7		A0A1D5SSU4_WHEAT	Uncharacterized protein	SubName: Full=Uncharacterized protein {ECO:0000313|EnsemblPlants:TRIAE_CS42_1DL_TGACv1_061622_AA0200210.1};
TRINITY_DN139_c0_g1_i4	tr|A0A1D5SET6|A0A1D5SET6_WHEAT	451	7.9e-254	884.8	87.6		A0A1D5SET6_WHEAT	Uncharacterized protein	SubName: Full=Uncharacterized protein {ECO:0000313|EnsemblPlants:TRIAE_CS42_1BL_TGACv1_032360_AA0128900.1};
TRINITY_DN139_c0_g1_i7	tr|A0A1D5SSU4|A0A1D5SSU4_WHEAT	559	1.8e-292	1013.4	87.4		A0A1D5SSU4_WHEAT	Uncharacterized protein	SubName: Full=Uncharacterized protein {ECO:0000313|EnsemblPlants:TRIAE_CS42_1DL_TGACv1_061622_AA0200210.1};
TRINITY_DN141_c0_g1_i1	tr|A0A287RU55|A0A287RU55_HORVV	93	8.8e-23	115.9	46.1		A0A287RU55_HORVV	Uncharacterized protein	SubName: Full=Uncharacterized protein {ECO:0000313|EnsemblPlants:HORVU5Hr1G075430.9};
TRINITY_DN141_c0_g1_i2	tr|A0A287RU55|A0A287RU55_HORVV	75	8.6e-23	115.9	37.1		A0A287RU55_HORVV	Uncharacterized protein	SubName: Full=Uncharacterized protein {ECO:0000313|EnsemblPlants:HORVU5Hr1G075430.9};
TRINITY_DN141_c1_g1_i10	tr|A0A1D5YZR0|A0A1D5YZR0_WHEAT	309	9.4e-117	428.7	99.7		A0A1D5YZR0_WHEAT	Uncharacterized protein	SubName: Full=Uncharacterized protein {ECO:0000313|EnsemblPlants:TRIAE_CS42_5BL_TGACv1_404446_AA1300110.2};
TRINITY_DN141_c1_g1_i3	tr|A0A1D5YZQ9|A0A1D5YZQ9_WHEAT	331	4.6e-130	473.4	77.2		A0A1D5YZQ9_WHEAT	Uncharacterized protein	SubName: Full=Uncharacterized protein {ECO:0000313|EnsemblPlants:TRIAE_CS42_5BL_TGACv1_404446_AA1300110.1};
TRINITY_DN141_c1_g1_i2	tr|A0A1D5YZQ9|A0A1D5YZQ9_WHEAT	331	1.8e-122	448.4	67.3		A0A1D5YZQ9_WHEAT	Uncharacterized protein	SubName: Full=Uncharacterized protein {ECO:0000313|EnsemblPlants:TRIAE_CS42_5BL_TGACv1_404446_AA1300110.1};
TRINITY_DN141_c1_g1_i4	tr|A0A1D5YZQ9|A0A1D5YZQ9_WHEAT	305	4.7e-134	486.5	80.1		A0A1D5YZQ9_WHEAT	Uncharacterized protein	SubName: Full=Uncharacterized protein {ECO:0000313|EnsemblPlants:TRIAE_CS42_5BL_TGACv1_404446_AA1300110.1};
TRINITY_DN141_c1_g1_i5	tr|A0A1D5YZR0|A0A1D5YZR0_WHEAT	261	4.4e-107	396.4	99.7		A0A1D5YZR0_WHEAT	Uncharacterized protein	SubName: Full=Uncharacterized protein {ECO:0000313|EnsemblPlants:TRIAE_CS42_5BL_TGACv1_404446_AA1300110.2};
TRINITY_DN141_c1_g1_i6	tr|A0A287RU40|A0A287RU40_HORVV	303	7.3e-138	499.2	75.2		A0A287RU40_HORVV	Uncharacterized protein	SubName: Full=Uncharacterized protein {ECO:0000313|EnsemblPlants:HORVU5Hr1G075430.5};
TRINITY_DN141_c1_g1_i9	tr|A0A1D5YZQ9|A0A1D5YZQ9_WHEAT	331	5.3e-130	473.4	66.9		A0A1D5YZQ9_WHEAT	Uncharacterized protein	SubName: Full=Uncharacterized protein {ECO:0000313|EnsemblPlants:TRIAE_CS42_5BL_TGACv1_404446_AA1300110.1};
TRINITY_DN141_c1_g1_i7	tr|A0A287RU40|A0A287RU40_HORVV	303	8.4e-138	499.2	65.6		A0A287RU40_HORVV	Uncharacterized protein	SubName: Full=Uncharacterized protein {ECO:0000313|EnsemblPlants:HORVU5Hr1G075430.5};
TRINITY_DN141_c1_g1_i1	tr|A0A1D5YZQ9|A0A1D5YZQ9_WHEAT	331	1.8e-122	448.4	66.4		A0A1D5YZQ9_WHEAT	Uncharacterized protein	SubName: Full=Uncharacterized protein {ECO:0000313|EnsemblPlants:TRIAE_CS42_5BL_TGACv1_404446_AA1300110.1};
TRINITY_DN138_c0_g1_i2	tr|N1QY92|N1QY92_AEGTA	219	7.3e-122	446.8	32.5	ORFNames=F775_26054 {ECO:0000313|EMBL:EMT15915.1};	N1QY92_AEGTA	Uncharacterized protein	SubName: Full=Uncharacterized protein {ECO:0000313|EMBL:EMT15915.1, ECO:0000313|EnsemblPlants:EMT15915};
TRINITY_DN138_c0_g1_i4	tr|N1QY92|N1QY92_AEGTA	169	4.8e-92	347.8	24.2	ORFNames=F775_26054 {ECO:0000313|EMBL:EMT15915.1};	N1QY92_AEGTA	Uncharacterized protein	SubName: Full=Uncharacterized protein {ECO:0000313|EMBL:EMT15915.1, ECO:0000313|EnsemblPlants:EMT15915};
TRINITY_DN138_c0_g1_i8	tr|W5A957|W5A957_WHEAT	169	2.5e-91	345.5	23		W5A957_WHEAT	Uncharacterized protein	SubName: Full=Uncharacterized protein {ECO:0000313|EnsemblPlants:TRIAE_CS42_1BS_TGACv1_050671_AA0174330.1};
TRINITY_DN138_c0_g1_i6	tr|W5A957|W5A957_WHEAT	169	1.4e-91	346.3	24		W5A957_WHEAT	Uncharacterized protein	SubName: Full=Uncharacterized protein {ECO:0000313|EnsemblPlants:TRIAE_CS42_1BS_TGACv1_050671_AA0174330.1};
TRINITY_DN138_c0_g1_i5	tr|Q8GTB8|Q8GTB8_WHEAT	212	2.4e-106	395.6	24.9	Name=gstf5 {ECO:0000313|EMBL:CAD29478.1};	Q8GTB8_WHEAT	Glutathione transferase F5	SubName: Full=Glutathione transferase F5 {ECO:0000313|EMBL:CAD29478.1}; EC=2.5.1.18 {ECO:0000313|EMBL:CAD29478.1};
TRINITY_DN138_c0_g1_i3	tr|Q8GTB8|Q8GTB8_WHEAT	205	1.1e-106	394.8	88.6	Name=gstf5 {ECO:0000313|EMBL:CAD29478.1};	Q8GTB8_WHEAT	Glutathione transferase F5	SubName: Full=Glutathione transferase F5 {ECO:0000313|EMBL:CAD29478.1}; EC=2.5.1.18 {ECO:0000313|EMBL:CAD29478.1};
TRINITY_DN138_c0_g1_i7	tr|Q8LGN5|Q8LGN5_WHEAT	219	3.6e-121	444.5	32.7		Q8LGN5_WHEAT	Glutathione-S-transferase 19E50	SubName: Full=Glutathione-S-transferase 19E50 {ECO:0000313|EMBL:AAL47688.1};
TRINITY_DN138_c0_g2_i2	tr|W5H4B4|W5H4B4_WHEAT	243	4.3e-139	503.1	71.4		W5H4B4_WHEAT	Uncharacterized protein	SubName: Full=Uncharacterized protein {ECO:0000313|EnsemblPlants:TRIAE_CS42_6DS_TGACv1_542726_AA1729020.1};
TRINITY_DN138_c0_g2_i1	tr|W5H4B4|W5H4B4_WHEAT	243	4.4e-139	503.1	70.4		W5H4B4_WHEAT	Uncharacterized protein	SubName: Full=Uncharacterized protein {ECO:0000313|EnsemblPlants:TRIAE_CS42_6DS_TGACv1_542726_AA1729020.1};
TRINITY_DN138_c1_g1_i3	tr|A0A1D5VDS2|A0A1D5VDS2_WHEAT	50	1.6e-20	107.8	36.6		A0A1D5VDS2_WHEAT	Uncharacterized protein	SubName: Full=Uncharacterized protein {ECO:0000313|EnsemblPlants:TRIAE_CS42_3AL_TGACv1_196283_AA0659090.1};
TRINITY_DN138_c1_g1_i2	tr|A0A1D5VDS2|A0A1D5VDS2_WHEAT	50	4.5e-20	107.5	17.1		A0A1D5VDS2_WHEAT	Uncharacterized protein	SubName: Full=Uncharacterized protein {ECO:0000313|EnsemblPlants:TRIAE_CS42_3AL_TGACv1_196283_AA0659090.1};
TRINITY_DN149_c0_g1_i4	tr|A0A1D6BBM1|A0A1D6BBM1_WHEAT	293	2.2e-131	478	58.6		A0A1D6BBM1_WHEAT	Uncharacterized protein	SubName: Full=Uncharacterized protein {ECO:0000313|EnsemblPlants:TRIAE_CS42_6DS_TGACv1_542484_AA1721970.1};
TRINITY_DN149_c0_g1_i7	tr|A0A1D6BBM1|A0A1D6BBM1_WHEAT	293	1.9e-131	478	64.8		A0A1D6BBM1_WHEAT	Uncharacterized protein	SubName: Full=Uncharacterized protein {ECO:0000313|EnsemblPlants:TRIAE_CS42_6DS_TGACv1_542484_AA1721970.1};
TRINITY_DN149_c0_g1_i2	tr|A0A1D6BBM1|A0A1D6BBM1_WHEAT	202	1.9e-87	332	41.3		A0A1D6BBM1_WHEAT	Uncharacterized protein	SubName: Full=Uncharacterized protein {ECO:0000313|EnsemblPlants:TRIAE_CS42_6DS_TGACv1_542484_AA1721970.1};
TRINITY_DN149_c0_g1_i5	tr|A0A1D6BBM1|A0A1D6BBM1_WHEAT	212	7.8e-89	336.7	42.6		A0A1D6BBM1_WHEAT	Uncharacterized protein	SubName: Full=Uncharacterized protein {ECO:0000313|EnsemblPlants:TRIAE_CS42_6DS_TGACv1_542484_AA1721970.1};
TRINITY_DN149_c0_g1_i1	tr|A0A1D6BBM1|A0A1D6BBM1_WHEAT	293	1e-124	455.7	67.1		A0A1D6BBM1_WHEAT	Uncharacterized protein	SubName: Full=Uncharacterized protein {ECO:0000313|EnsemblPlants:TRIAE_CS42_6DS_TGACv1_542484_AA1721970.1};
TRINITY_DN149_c0_g1_i6	tr|A0A1D6BBM1|A0A1D6BBM1_WHEAT	202	1.7e-87	332	45.8		A0A1D6BBM1_WHEAT	Uncharacterized protein	SubName: Full=Uncharacterized protein {ECO:0000313|EnsemblPlants:TRIAE_CS42_6DS_TGACv1_542484_AA1721970.1};
TRINITY_DN198_c0_g1_i6	tr|A0A077RS69|A0A077RS69_WHEAT	619	0	1135.6	75.2	ORFNames=TRAES_3BF094600020CFD_c1 {ECO:0000313|EMBL:CDM85543.1}, TRAES_3BF095600010CFD_c1 {ECO:0000313|EMBL:CDM85565.1}, TRAES_3BF105800120CFD_c1 {ECO:0000313|EMBL:CDM83192.1};	A0A077RS69_WHEAT	Uncharacterized protein	SubName: Full=Uncharacterized protein {ECO:0000313|EMBL:CDM83192.1, ECO:0000313|EnsemblPlants:TRIAE_CS42_3B_TGACv1_220900_AA0723180.1};
TRINITY_DN198_c0_g1_i2	tr|A0A077RS69|A0A077RS69_WHEAT	618	0	1141.7	75.6	ORFNames=TRAES_3BF094600020CFD_c1 {ECO:0000313|EMBL:CDM85543.1}, TRAES_3BF095600010CFD_c1 {ECO:0000313|EMBL:CDM85565.1}, TRAES_3BF105800120CFD_c1 {ECO:0000313|EMBL:CDM83192.1};	A0A077RS69_WHEAT	Uncharacterized protein	SubName: Full=Uncharacterized protein {ECO:0000313|EMBL:CDM83192.1, ECO:0000313|EnsemblPlants:TRIAE_CS42_3B_TGACv1_220900_AA0723180.1};
TRINITY_DN198_c0_g1_i7	tr|A0A077RS69|A0A077RS69_WHEAT	617	0	1140.9	75.6	ORFNames=TRAES_3BF094600020CFD_c1 {ECO:0000313|EMBL:CDM85543.1}, TRAES_3BF095600010CFD_c1 {ECO:0000313|EMBL:CDM85565.1}, TRAES_3BF105800120CFD_c1 {ECO:0000313|EMBL:CDM83192.1};	A0A077RS69_WHEAT	Uncharacterized protein	SubName: Full=Uncharacterized protein {ECO:0000313|EMBL:CDM83192.1, ECO:0000313|EnsemblPlants:TRIAE_CS42_3B_TGACv1_220900_AA0723180.1};
TRINITY_DN198_c0_g1_i1	tr|A0A1D6SF87|A0A1D6SF87_WHEAT	111	1.3e-21	113.2	23.9		A0A1D6SF87_WHEAT	Uncharacterized protein	SubName: Full=Uncharacterized protein {ECO:0000313|EnsemblPlants:TRIAE_CS42_7DL_TGACv1_603728_AA1987980.1};
TRINITY_DN100_c0_g1_i5	tr|A0A1D5WYX0|A0A1D5WYX0_WHEAT	1890	0	3685.6	94.3		A0A1D5WYX0_WHEAT	Uncharacterized protein	SubName: Full=Uncharacterized protein {ECO:0000313|EnsemblPlants:TRIAE_CS42_4AL_TGACv1_288366_AA0946550.1};
TRINITY_DN100_c0_g1_i2	tr|A0A1D5WYX0|A0A1D5WYX0_WHEAT	1890	0	3682.9	95.3		A0A1D5WYX0_WHEAT	Uncharacterized protein	SubName: Full=Uncharacterized protein {ECO:0000313|EnsemblPlants:TRIAE_CS42_4AL_TGACv1_288366_AA0946550.1};
TRINITY_DN100_c0_g1_i4	tr|A0A1D5TZW1|A0A1D5TZW1_WHEAT	81	2.9e-10	75.1	23.7		A0A1D5TZW1_WHEAT	Anamorsin homolog; Fe-S cluster assembly protein DRE2 homolog	RecName: Full=Anamorsin homolog {ECO:0000256|HAMAP-Rule:MF_03115}; AltName: Full=Fe-S cluster assembly protein DRE2 homolog {ECO:0000256|HAMAP-Rule:MF_03115};
TRINITY_DN100_c0_g1_i3	tr|A0A1D5WYX0|A0A1D5WYX0_WHEAT	1890	0	3686	91.1		A0A1D5WYX0_WHEAT	Uncharacterized protein	SubName: Full=Uncharacterized protein {ECO:0000313|EnsemblPlants:TRIAE_CS42_4AL_TGACv1_288366_AA0946550.1};
TRINITY_DN100_c0_g1_i1	tr|A0A1D5ZTQ2|A0A1D5ZTQ2_WHEAT	1809	0	3508	99.9		A0A1D5ZTQ2_WHEAT	Uncharacterized protein	SubName: Full=Uncharacterized protein {ECO:0000313|EnsemblPlants:TRIAE_CS42_5DL_TGACv1_434803_AA1441880.1};
TRINITY_DN100_c0_g2_i1	tr|M7ZMQ3|M7ZMQ3_TRIUA	42	4.9e-07	64.7	9.9	ORFNames=TRIUR3_19593 {ECO:0000313|EMBL:EMS49359.1};	M7ZMQ3_TRIUA	Bidirectional sugar transporter SWEET1b	SubName: Full=Bidirectional sugar transporter SWEET1b {ECO:0000313|EMBL:EMS49359.1, ECO:0000313|EnsemblPlants:TRIUR3_19593-P1};
TRINITY_DN125_c0_g1_i7	sp|P68526|ATP6_TRITI	386	1.1e-191	678.3	75.7	Name=ATP6;	ATP6_TRITI	ATP synthase subunit a; F-ATPase protein 6	RecName: Full=ATP synthase subunit a; AltName: Full=F-ATPase protein 6;
TRINITY_DN125_c0_g1_i8	tr|A0A1E5W737|A0A1E5W737_9POAL	191	8.7e-51	211.1	21.5	ORFNames=BAE44_0005745 {ECO:0000313|EMBL:OEL33236.1};	A0A1E5W737_9POAL	Uncharacterized protein	SubName: Full=Uncharacterized protein {ECO:0000313|EMBL:OEL33236.1};
TRINITY_DN125_c0_g1_i12	tr|A0A077RSP7|A0A077RSP7_WHEAT	299	5.6e-145	524.2	28.6	ORFNames=TRAES_3BF057900180CFD_c1 {ECO:0000313|EMBL:CDM81347.1};	A0A077RSP7_WHEAT	Uncharacterized protein	SubName: Full=Uncharacterized protein {ECO:0000313|EMBL:CDM81347.1};
TRINITY_DN125_c0_g1_i2	sp|P68537|MI25_TRITI	192	4.2e-90	341.7	22.4		MI25_TRITI	ATP synthase protein MI25; ORF25	RecName: Full=ATP synthase protein MI25; AltName: Full=ORF25;
TRINITY_DN125_c0_g1_i13	tr|B3VEX2|B3VEX2_BAMOL	260	1.4e-145	526.6	19.9	Name=cox2 {ECO:0000313|EMBL:ACE79204.1};	B3VEX2_BAMOL	Cytochrome c oxidase subunit 2	RecName: Full=Cytochrome c oxidase subunit 2 {ECO:0000256|RuleBase:RU000457, ECO:0000256|SAAS:SAAS00709560};
TRINITY_DN125_c0_g1_i5	tr|Q8HCR2|Q8HCR2_ORYSJ	148	7.9e-76	293.5	28.7	Name=rps7 {ECO:0000313|EMBL:BAC19857.2};	Q8HCR2_ORYSJ	Ribosomal protein S7	SubName: Full=Ribosomal protein S7 {ECO:0000313|EMBL:BAC19857.2};
TRINITY_DN125_c0_g1_i16	sp|P68537|MI25_TRITI	192	2.8e-90	341.7	33.6		MI25_TRITI	ATP synthase protein MI25; ORF25	RecName: Full=ATP synthase protein MI25; AltName: Full=ORF25;
TRINITY_DN125_c0_g1_i3	tr|A0A077RSP7|A0A077RSP7_WHEAT	299	6.3e-145	524.2	25.3	ORFNames=TRAES_3BF057900180CFD_c1 {ECO:0000313|EMBL:CDM81347.1};	A0A077RSP7_WHEAT	Uncharacterized protein	SubName: Full=Uncharacterized protein {ECO:0000313|EMBL:CDM81347.1};
TRINITY_DN125_c0_g1_i14	tr|B3VEX2|B3VEX2_BAMOL	260	1.6e-145	526.6	17.8	Name=cox2 {ECO:0000313|EMBL:ACE79204.1};	B3VEX2_BAMOL	Cytochrome c oxidase subunit 2	RecName: Full=Cytochrome c oxidase subunit 2 {ECO:0000256|RuleBase:RU000457, ECO:0000256|SAAS:SAAS00709560};
TRINITY_DN125_c0_g1_i1	tr|A0A1E5W737|A0A1E5W737_9POAL	191	5.8e-51	211.1	32.1	ORFNames=BAE44_0005745 {ECO:0000313|EMBL:OEL33236.1};	A0A1E5W737_9POAL	Uncharacterized protein	SubName: Full=Uncharacterized protein {ECO:0000313|EMBL:OEL33236.1};
TRINITY_DN125_c0_g1_i9	tr|A0A1E5W737|A0A1E5W737_9POAL	191	7.3e-51	211.1	25.6	ORFNames=BAE44_0005745 {ECO:0000313|EMBL:OEL33236.1};	A0A1E5W737_9POAL	Uncharacterized protein	SubName: Full=Uncharacterized protein {ECO:0000313|EMBL:OEL33236.1};
TRINITY_DN125_c0_g1_i10	tr|A0A141NB96|A0A141NB96_ORYMI	428	9.2e-195	690.3	25.9	Name=cox2 {ECO:0000313|EMBL:AMA06725.1};	A0A141NB96_ORYMI	Cytochrome c oxidase subunit 2	RecName: Full=Cytochrome c oxidase subunit 2 {ECO:0000256|RuleBase:RU000457};
TRINITY_DN125_c0_g1_i11	tr|A0A077RSP7|A0A077RSP7_WHEAT	299	4.8e-145	524.2	33.3	ORFNames=TRAES_3BF057900180CFD_c1 {ECO:0000313|EMBL:CDM81347.1};	A0A077RSP7_WHEAT	Uncharacterized protein	SubName: Full=Uncharacterized protein {ECO:0000313|EMBL:CDM81347.1};
TRINITY_DN125_c0_g1_i17	sp|P43650|YMF19_WHEAT	156	1.5e-75	293.1	20.1	Name=YMF19;	YMF19_WHEAT	Putative ATP synthase protein YMF19; 18 kDa membrane-bound protein; Mitochondrial protein YMF19; ORF156	RecName: Full=Putative ATP synthase protein YMF19; EC=3.6.3.14; AltName: Full=18 kDa membrane-bound protein; AltName: Full=Mitochondrial protein YMF19; AltName: Full=ORF156;
TRINITY_DN129_c0_g1_i8	tr|A0A1D6AVI0|A0A1D6AVI0_WHEAT	334	1.5e-128	468	99.5		A0A1D6AVI0_WHEAT	Uncharacterized protein	SubName: Full=Uncharacterized protein {ECO:0000313|EnsemblPlants:TRIAE_CS42_6BS_TGACv1_513288_AA1637590.1};
TRINITY_DN129_c0_g1_i6	tr|A0A1D6AVI0|A0A1D6AVI0_WHEAT	303	5.1e-107	396.4	99.9		A0A1D6AVI0_WHEAT	Uncharacterized protein	SubName: Full=Uncharacterized protein {ECO:0000313|EnsemblPlants:TRIAE_CS42_6BS_TGACv1_513288_AA1637590.1};
TRINITY_DN129_c0_g1_i2	tr|A0A1D6BEX9|A0A1D6BEX9_WHEAT	715	0	1191	89.7		A0A1D6BEX9_WHEAT	Uncharacterized protein	SubName: Full=Uncharacterized protein {ECO:0000313|EnsemblPlants:TRIAE_CS42_6DS_TGACv1_543403_AA1739530.1};
TRINITY_DN129_c0_g1_i1	tr|A0A287T8J6|A0A287T8J6_HORVV	603	2.4e-278	966.5	99.8		A0A287T8J6_HORVV	Uncharacterized protein	SubName: Full=Uncharacterized protein {ECO:0000313|EnsemblPlants:HORVU6Hr1G008590.12};
TRINITY_DN129_c0_g1_i3	tr|A0A1D6AEC9|A0A1D6AEC9_WHEAT	629	4.3e-305	1055.4	96.3		A0A1D6AEC9_WHEAT	Uncharacterized protein	SubName: Full=Uncharacterized protein {ECO:0000313|EnsemblPlants:TRIAE_CS42_6AS_TGACv1_485368_AA1544240.1};
TRINITY_DN129_c0_g1_i7	tr|A0A1D6BEX9|A0A1D6BEX9_WHEAT	715	0	1174.1	81.1		A0A1D6BEX9_WHEAT	Uncharacterized protein	SubName: Full=Uncharacterized protein {ECO:0000313|EnsemblPlants:TRIAE_CS42_6DS_TGACv1_543403_AA1739530.1};
TRINITY_DN129_c0_g1_i9	tr|A0A1D6BEX9|A0A1D6BEX9_WHEAT	715	0	1173.7	81.1		A0A1D6BEX9_WHEAT	Uncharacterized protein	SubName: Full=Uncharacterized protein {ECO:0000313|EnsemblPlants:TRIAE_CS42_6DS_TGACv1_543403_AA1739530.1};
TRINITY_DN129_c0_g1_i4	tr|A0A1D6BEX9|A0A1D6BEX9_WHEAT	715	0	1173.7	81.6		A0A1D6BEX9_WHEAT	Uncharacterized protein	SubName: Full=Uncharacterized protein {ECO:0000313|EnsemblPlants:TRIAE_CS42_6DS_TGACv1_543403_AA1739530.1};
TRINITY_DN132_c0_g1_i3	tr|A0A1D6D0C8|A0A1D6D0C8_WHEAT	200	1.9e-106	394.8	52.1		A0A1D6D0C8_WHEAT	Uncharacterized protein	SubName: Full=Uncharacterized protein {ECO:0000313|EnsemblPlants:TRIAE_CS42_7DS_TGACv1_622353_AA2038230.1};
TRINITY_DN132_c0_g1_i2	tr|W5DVH0|W5DVH0_WHEAT	200	1.9e-106	394.8	52.3		W5DVH0_WHEAT	Uncharacterized protein	SubName: Full=Uncharacterized protein {ECO:0000313|EnsemblPlants:TRIAE_CS42_4AL_TGACv1_288580_AA0952610.1};
TRINITY_DN132_c0_g1_i1	tr|A0A1D6D0C8|A0A1D6D0C8_WHEAT	200	1.9e-106	394.8	51.7		A0A1D6D0C8_WHEAT	Uncharacterized protein	SubName: Full=Uncharacterized protein {ECO:0000313|EnsemblPlants:TRIAE_CS42_7DS_TGACv1_622353_AA2038230.1};
TRINITY_DN132_c0_g2_i4	tr|A0A1D6BM18|A0A1D6BM18_WHEAT	167	7.2e-89	337.4	21.2		A0A1D6BM18_WHEAT	Uncharacterized protein	SubName: Full=Uncharacterized protein {ECO:0000313|EnsemblPlants:TRIAE_CS42_7AL_TGACv1_557104_AA1776520.2};
TRINITY_DN132_c0_g2_i2	tr|A0A1D6BM19|A0A1D6BM19_WHEAT	191	2.7e-103	384.4	46.6		A0A1D6BM19_WHEAT	Uncharacterized protein	SubName: Full=Uncharacterized protein {ECO:0000313|EnsemblPlants:TRIAE_CS42_7AL_TGACv1_557104_AA1776520.3};
TRINITY_DN164_c0_g1_i3	tr|A0A287R9C2|A0A287R9C2_HORVV	576	1.6e-298	1033.5	96.6		A0A287R9C2_HORVV	Sodium/hydrogen exchanger	RecName: Full=Sodium/hydrogen exchanger {ECO:0000256|RuleBase:RU003722};
TRINITY_DN164_c0_g1_i1	tr|A0A287R9C2|A0A287R9C2_HORVV	575	1.9e-300	1040	87.8		A0A287R9C2_HORVV	Sodium/hydrogen exchanger	RecName: Full=Sodium/hydrogen exchanger {ECO:0000256|RuleBase:RU003722};
TRINITY_DN164_c0_g1_i5	tr|A0A287R9C2|A0A287R9C2_HORVV	575	2.3e-300	1040	71.7		A0A287R9C2_HORVV	Sodium/hydrogen exchanger	RecName: Full=Sodium/hydrogen exchanger {ECO:0000256|RuleBase:RU003722};
TRINITY_DN164_c0_g1_i2	tr|A0A287R9C2|A0A287R9C2_HORVV	575	6.7e-300	1038.5	72.1		A0A287R9C2_HORVV	Sodium/hydrogen exchanger	RecName: Full=Sodium/hydrogen exchanger {ECO:0000256|RuleBase:RU003722};
TRINITY_DN164_c0_g1_i4	tr|A0A1D5ZP59|A0A1D5ZP59_WHEAT	104	4.1e-47	196.8	48.8		A0A1D5ZP59_WHEAT	Sodium/hydrogen exchanger	RecName: Full=Sodium/hydrogen exchanger {ECO:0000256|RuleBase:RU003722};
TRINITY_DN164_c1_g1_i7	tr|A0A287HSJ0|A0A287HSJ0_HORVV	62	2.1e-28	137.1	5.5		A0A287HSJ0_HORVV	Uncharacterized protein	SubName: Full=Uncharacterized protein {ECO:0000313|EnsemblPlants:HORVU2Hr1G040180.22};
TRINITY_DN164_c1_g1_i1	tr|A0A1D5TPG7|A0A1D5TPG7_WHEAT	159	9.3e-54	222.2	7.4		A0A1D5TPG7_WHEAT	Phospholipid-transporting ATPase	RecName: Full=Phospholipid-transporting ATPase {ECO:0000256|RuleBase:RU362033}; EC=3.6.3.1 {ECO:0000256|RuleBase:RU362033};
TRINITY_DN164_c1_g1_i5	tr|B9FDK7|B9FDK7_ORYSJ	387	5.1e-38	169.1	32.7	ORFNames=OsJ_13735 {ECO:0000313|EMBL:EEE60474.1};	B9FDK7_ORYSJ	Phospholipid-transporting ATPase	RecName: Full=Phospholipid-transporting ATPase {ECO:0000256|RuleBase:RU362033}; EC=3.6.3.1 {ECO:0000256|RuleBase:RU362033};
TRINITY_DN164_c1_g1_i6	tr|A0A1D5TPG7|A0A1D5TPG7_WHEAT	159	7.9e-54	222.2	8.7		A0A1D5TPG7_WHEAT	Phospholipid-transporting ATPase	RecName: Full=Phospholipid-transporting ATPase {ECO:0000256|RuleBase:RU362033}; EC=3.6.3.1 {ECO:0000256|RuleBase:RU362033};
TRINITY_DN164_c1_g1_i3	tr|A0A1D5TPG7|A0A1D5TPG7_WHEAT	159	7.7e-54	222.2	8.9		A0A1D5TPG7_WHEAT	Phospholipid-transporting ATPase	RecName: Full=Phospholipid-transporting ATPase {ECO:0000256|RuleBase:RU362033}; EC=3.6.3.1 {ECO:0000256|RuleBase:RU362033};
TRINITY_DN164_c1_g1_i2	tr|A0A1D5TPG7|A0A1D5TPG7_WHEAT	159	7.8e-54	222.2	8.8		A0A1D5TPG7_WHEAT	Phospholipid-transporting ATPase	RecName: Full=Phospholipid-transporting ATPase {ECO:0000256|RuleBase:RU362033}; EC=3.6.3.1 {ECO:0000256|RuleBase:RU362033};
TRINITY_DN164_c2_g1_i2	tr|A0A1D5SHW9|A0A1D5SHW9_WHEAT	37	4.1e-11	76.3	34.4		A0A1D5SHW9_WHEAT	Uncharacterized protein	SubName: Full=Uncharacterized protein {ECO:0000313|EnsemblPlants:TRIAE_CS42_1BL_TGACv1_034113_AA0143480.1};
TRINITY_DN164_c2_g2_i1	tr|A0A077RHD6|A0A077RHD6_WHEAT	26	2e-05	58.2	14.2	ORFNames=TRAES_3BF019900030CFD_c1 {ECO:0000313|EMBL:CDJ26292.1};	A0A077RHD6_WHEAT	Uncharacterized protein	SubName: Full=Uncharacterized protein {ECO:0000313|EMBL:CDJ26292.1, ECO:0000313|EnsemblPlants:TRIAE_CS42_3B_TGACv1_222291_AA0761390.1};
TRINITY_DN190_c0_g1_i1	tr|A0A1D6A8A4|A0A1D6A8A4_WHEAT	80	2.6e-40	176	10.8		A0A1D6A8A4_WHEAT	Uncharacterized protein	SubName: Full=Uncharacterized protein {ECO:0000313|EnsemblPlants:TRIAE_CS42_6AL_TGACv1_471784_AA1514240.4};
TRINITY_DN190_c0_g1_i3	tr|A0A1D6A8A4|A0A1D6A8A4_WHEAT	80	2.5e-40	176	11.2		A0A1D6A8A4_WHEAT	Uncharacterized protein	SubName: Full=Uncharacterized protein {ECO:0000313|EnsemblPlants:TRIAE_CS42_6AL_TGACv1_471784_AA1514240.4};
TRINITY_DN190_c0_g1_i7	tr|A0A1D6A8A4|A0A1D6A8A4_WHEAT	80	2.2e-40	176	13.1		A0A1D6A8A4_WHEAT	Uncharacterized protein	SubName: Full=Uncharacterized protein {ECO:0000313|EnsemblPlants:TRIAE_CS42_6AL_TGACv1_471784_AA1514240.4};
TRINITY_DN190_c0_g1_i6	tr|A0A1D6A8A2|A0A1D6A8A2_WHEAT	142	2.3e-77	298.1	38.7		A0A1D6A8A2_WHEAT	Uncharacterized protein	SubName: Full=Uncharacterized protein {ECO:0000313|EnsemblPlants:TRIAE_CS42_6AL_TGACv1_471784_AA1514240.2};
TRINITY_DN190_c0_g1_i4	tr|A0A1D6A8A1|A0A1D6A8A1_WHEAT	35	3.3e-12	81.3	12.6		A0A1D6A8A1_WHEAT	Uncharacterized protein	SubName: Full=Uncharacterized protein {ECO:0000313|EnsemblPlants:TRIAE_CS42_6AL_TGACv1_471784_AA1514240.1};
TRINITY_DN190_c0_g1_i5	tr|M7ZAJ0|M7ZAJ0_TRIUA	46	3.4e-14	86.7	37.8	ORFNames=TRIUR3_10412 {ECO:0000313|EMBL:EMS60238.1};	M7ZAJ0_TRIUA	Stomatin-like protein 2	SubName: Full=Stomatin-like protein 2 {ECO:0000313|EMBL:EMS60238.1, ECO:0000313|EnsemblPlants:TRIUR3_10412-P1};
TRINITY_DN190_c0_g1_i2	tr|A0A1D6A8A6|A0A1D6A8A6_WHEAT	141	4.8e-78	300.8	28.4		A0A1D6A8A6_WHEAT	Uncharacterized protein	SubName: Full=Uncharacterized protein {ECO:0000313|EnsemblPlants:TRIAE_CS42_6AL_TGACv1_471784_AA1514240.6};
TRINITY_DN190_c1_g1_i1	tr|M8CF01|M8CF01_AEGTA	44	7.8e-06	59.7	20.9	ORFNames=F775_27346 {ECO:0000313|EMBL:EMT33019.1};	M8CF01_AEGTA	B3 domain-containing protein	SubName: Full=B3 domain-containing protein {ECO:0000313|EMBL:EMT33019.1, ECO:0000313|EnsemblPlants:EMT33019};
TRINITY_DN190_c2_g1_i1	tr|A0A1D6A8A4|A0A1D6A8A4_WHEAT	45	5.2e-17	97.4	13.9		A0A1D6A8A4_WHEAT	Uncharacterized protein	SubName: Full=Uncharacterized protein {ECO:0000313|EnsemblPlants:TRIAE_CS42_6AL_TGACv1_471784_AA1514240.4};
TRINITY_DN190_c2_g1_i2	tr|A0A1D6A8A4|A0A1D6A8A4_WHEAT	49	8e-17	96.7	16.8		A0A1D6A8A4_WHEAT	Uncharacterized protein	SubName: Full=Uncharacterized protein {ECO:0000313|EnsemblPlants:TRIAE_CS42_6AL_TGACv1_471784_AA1514240.4};
TRINITY_DN152_c0_g1_i2	tr|F2E7Y7|F2E7Y7_HORVV	41	0.00075	52.4	32.3		F2E7Y7_HORVV	Predicted protein	SubName: Full=Predicted protein {ECO:0000313|EMBL:BAK03459.1};
TRINITY_DN152_c0_g1_i3	tr|F2E7Y7|F2E7Y7_HORVV	41	0.00074	52.4	32.7		F2E7Y7_HORVV	Predicted protein	SubName: Full=Predicted protein {ECO:0000313|EMBL:BAK03459.1};
TRINITY_DN135_c0_g1_i2	tr|A0A1D5TN66|A0A1D5TN66_WHEAT	371	3.3e-82	314.7	71.7		A0A1D5TN66_WHEAT	Uncharacterized protein	SubName: Full=Uncharacterized protein {ECO:0000313|EnsemblPlants:TRIAE_CS42_2AS_TGACv1_113273_AA0353800.1};
TRINITY_DN135_c0_g1_i3	tr|A0A1D5TN66|A0A1D5TN66_WHEAT	371	4.2e-82	314.3	73.6		A0A1D5TN66_WHEAT	Uncharacterized protein	SubName: Full=Uncharacterized protein {ECO:0000313|EnsemblPlants:TRIAE_CS42_2AS_TGACv1_113273_AA0353800.1};
TRINITY_DN135_c0_g1_i1	tr|A0A1D5TN66|A0A1D5TN66_WHEAT	371	4.7e-82	314.3	65.7		A0A1D5TN66_WHEAT	Uncharacterized protein	SubName: Full=Uncharacterized protein {ECO:0000313|EnsemblPlants:TRIAE_CS42_2AS_TGACv1_113273_AA0353800.1};
TRINITY_DN135_c0_g1_i4	tr|A0A1D5TN66|A0A1D5TN66_WHEAT	371	4.6e-82	314.3	67.2		A0A1D5TN66_WHEAT	Uncharacterized protein	SubName: Full=Uncharacterized protein {ECO:0000313|EnsemblPlants:TRIAE_CS42_2AS_TGACv1_113273_AA0353800.1};
TRINITY_DN135_c0_g1_i6	tr|M7ZU58|M7ZU58_TRIUA	48	1.3e-14	89	20.4	ORFNames=TRIUR3_02482 {ECO:0000313|EMBL:EMS51629.1};	M7ZU58_TRIUA	PHD finger protein 3	SubName: Full=PHD finger protein 3 {ECO:0000313|EMBL:EMS51629.1, ECO:0000313|EnsemblPlants:TRIUR3_02482-P1};
TRINITY_DN140_c0_g1_i10	tr|A0A1D6BGF4|A0A1D6BGF4_WHEAT	323	1.3e-164	589	43.7		A0A1D6BGF4_WHEAT	Uncharacterized protein	SubName: Full=Uncharacterized protein {ECO:0000313|EnsemblPlants:TRIAE_CS42_6DS_TGACv1_544129_AA1746620.1};
TRINITY_DN140_c0_g1_i12	tr|A0A1D6AY27|A0A1D6AY27_WHEAT	539	7e-278	965.3	69.6		A0A1D6AY27_WHEAT	Uncharacterized protein	SubName: Full=Uncharacterized protein {ECO:0000313|EnsemblPlants:TRIAE_CS42_6BS_TGACv1_513993_AA1653660.2};
TRINITY_DN140_c0_g1_i5	tr|A0A1D6BGF4|A0A1D6BGF4_WHEAT	617	1.1e-284	988	72.2		A0A1D6BGF4_WHEAT	Uncharacterized protein	SubName: Full=Uncharacterized protein {ECO:0000313|EnsemblPlants:TRIAE_CS42_6DS_TGACv1_544129_AA1746620.1};
TRINITY_DN140_c0_g1_i2	tr|A0A1D6BGF4|A0A1D6BGF4_WHEAT	323	1.3e-164	589	43.7		A0A1D6BGF4_WHEAT	Uncharacterized protein	SubName: Full=Uncharacterized protein {ECO:0000313|EnsemblPlants:TRIAE_CS42_6DS_TGACv1_544129_AA1746620.1};
TRINITY_DN140_c0_g1_i8	tr|N1QXC1|N1QXC1_AEGTA	184	4.3e-102	379.8	69.2	ORFNames=F775_11993 {ECO:0000313|EMBL:EMT15226.1};	N1QXC1_AEGTA	Acyltransferase-like protein	SubName: Full=Acyltransferase-like protein {ECO:0000313|EMBL:EMT15226.1, ECO:0000313|EnsemblPlants:EMT15226};
TRINITY_DN140_c0_g1_i1	tr|A0A1D6AY27|A0A1D6AY27_WHEAT	170	3.2e-90	339.7	99.6		A0A1D6AY27_WHEAT	Uncharacterized protein	SubName: Full=Uncharacterized protein {ECO:0000313|EnsemblPlants:TRIAE_CS42_6BS_TGACv1_513993_AA1653660.2};
TRINITY_DN140_c0_g1_i6	tr|A0A1D6BGF4|A0A1D6BGF4_WHEAT	537	1.2e-282	981.1	69.4		A0A1D6BGF4_WHEAT	Uncharacterized protein	SubName: Full=Uncharacterized protein {ECO:0000313|EnsemblPlants:TRIAE_CS42_6DS_TGACv1_544129_AA1746620.1};
TRINITY_DN140_c0_g1_i7	tr|N1QXC1|N1QXC1_AEGTA	346	6.1e-134	486.1	90.7	ORFNames=F775_11993 {ECO:0000313|EMBL:EMT15226.1};	N1QXC1_AEGTA	Acyltransferase-like protein	SubName: Full=Acyltransferase-like protein {ECO:0000313|EMBL:EMT15226.1, ECO:0000313|EnsemblPlants:EMT15226};
TRINITY_DN140_c0_g1_i11	tr|A0A1D6BGF4|A0A1D6BGF4_WHEAT	586	3.2e-289	1003	71.2		A0A1D6BGF4_WHEAT	Uncharacterized protein	SubName: Full=Uncharacterized protein {ECO:0000313|EnsemblPlants:TRIAE_CS42_6DS_TGACv1_544129_AA1746620.1};
TRINITY_DN140_c0_g1_i3	tr|A0A1D6BGF4|A0A1D6BGF4_WHEAT	586	3.2e-289	1003	71.2		A0A1D6BGF4_WHEAT	Uncharacterized protein	SubName: Full=Uncharacterized protein {ECO:0000313|EnsemblPlants:TRIAE_CS42_6DS_TGACv1_544129_AA1746620.1};
TRINITY_DN140_c0_g2_i1	tr|N1QV12|N1QV12_AEGTA	72	1.1e-22	117.5	10	ORFNames=F775_19178 {ECO:0000313|EMBL:EMT13834.1};	N1QV12_AEGTA	Uncharacterized protein	SubName: Full=Uncharacterized protein {ECO:0000313|EMBL:EMT13834.1, ECO:0000313|EnsemblPlants:EMT13834};
TRINITY_DN140_c0_g2_i2	tr|N1QV12|N1QV12_AEGTA	70	3.1e-21	112.8	8.2	ORFNames=F775_19178 {ECO:0000313|EMBL:EMT13834.1};	N1QV12_AEGTA	Uncharacterized protein	SubName: Full=Uncharacterized protein {ECO:0000313|EMBL:EMT13834.1, ECO:0000313|EnsemblPlants:EMT13834};
TRINITY_DN140_c0_g2_i3	tr|N1QV12|N1QV12_AEGTA	70	2.1e-21	112.8	12.1	ORFNames=F775_19178 {ECO:0000313|EMBL:EMT13834.1};	N1QV12_AEGTA	Uncharacterized protein	SubName: Full=Uncharacterized protein {ECO:0000313|EMBL:EMT13834.1, ECO:0000313|EnsemblPlants:EMT13834};
TRINITY_DN140_c0_g3_i1	tr|W5A694|W5A694_WHEAT	689	0	1380.2	85		W5A694_WHEAT	Uncharacterized protein	SubName: Full=Uncharacterized protein {ECO:0000313|EnsemblPlants:TRIAE_CS42_1BL_TGACv1_031510_AA0115290.1};
TRINITY_DN140_c1_g3_i2	tr|A0A1D5W2U2|A0A1D5W2U2_WHEAT	36	0.00028	54.7	15.5		A0A1D5W2U2_WHEAT	Uncharacterized protein	SubName: Full=Uncharacterized protein {ECO:0000313|EnsemblPlants:TRIAE_CS42_3B_TGACv1_223648_AA0785110.1};
TRINITY_DN140_c2_g1_i5	tr|R7VZ52|R7VZ52_AEGTA	211	2.1e-81	312	41.2	ORFNames=F775_23858 {ECO:0000313|EMBL:EMT00355.1};	R7VZ52_AEGTA	Uncharacterized protein	SubName: Full=Uncharacterized protein {ECO:0000313|EMBL:EMT00355.1, ECO:0000313|EnsemblPlants:EMT00355};
TRINITY_DN140_c2_g1_i6	tr|R7VZ52|R7VZ52_AEGTA	128	5.5e-65	257.3	28.4	ORFNames=F775_23858 {ECO:0000313|EMBL:EMT00355.1};	R7VZ52_AEGTA	Uncharacterized protein	SubName: Full=Uncharacterized protein {ECO:0000313|EMBL:EMT00355.1, ECO:0000313|EnsemblPlants:EMT00355};
TRINITY_DN140_c2_g1_i4	tr|R7VZ52|R7VZ52_AEGTA	128	4.1e-65	257.3	37.8	ORFNames=F775_23858 {ECO:0000313|EMBL:EMT00355.1};	R7VZ52_AEGTA	Uncharacterized protein	SubName: Full=Uncharacterized protein {ECO:0000313|EMBL:EMT00355.1, ECO:0000313|EnsemblPlants:EMT00355};
TRINITY_DN140_c2_g1_i10	tr|R7VZ52|R7VZ52_AEGTA	128	4.8e-65	257.7	24.8	ORFNames=F775_23858 {ECO:0000313|EMBL:EMT00355.1};	R7VZ52_AEGTA	Uncharacterized protein	SubName: Full=Uncharacterized protein {ECO:0000313|EMBL:EMT00355.1, ECO:0000313|EnsemblPlants:EMT00355};
TRINITY_DN140_c2_g1_i11	tr|R7VYK0|R7VYK0_AEGTA	100	1.3e-33	151.8	56	ORFNames=F775_25289 {ECO:0000313|EMBL:EMT00434.1};	R7VYK0_AEGTA	Uncharacterized protein	SubName: Full=Uncharacterized protein {ECO:0000313|EMBL:EMT00434.1, ECO:0000313|EnsemblPlants:EMT00434};
TRINITY_DN178_c0_g1_i6	tr|A0A287X8S2|A0A287X8S2_HORVV	128	1.2e-63	252.3	40.7		A0A287X8S2_HORVV	Uncharacterized protein	SubName: Full=Uncharacterized protein {ECO:0000313|EnsemblPlants:HORVU7Hr1G089040.1};
TRINITY_DN178_c0_g1_i2	tr|A0A287X8S2|A0A287X8S2_HORVV	128	2.8e-62	247.7	43.1		A0A287X8S2_HORVV	Uncharacterized protein	SubName: Full=Uncharacterized protein {ECO:0000313|EnsemblPlants:HORVU7Hr1G089040.1};
TRINITY_DN178_c0_g1_i1	tr|A0A287X8S2|A0A287X8S2_HORVV	128	1.1e-63	252.3	43.1		A0A287X8S2_HORVV	Uncharacterized protein	SubName: Full=Uncharacterized protein {ECO:0000313|EnsemblPlants:HORVU7Hr1G089040.1};
TRINITY_DN178_c0_g1_i9	tr|A0A287X8S2|A0A287X8S2_HORVV	128	2.8e-62	247.7	43.9		A0A287X8S2_HORVV	Uncharacterized protein	SubName: Full=Uncharacterized protein {ECO:0000313|EnsemblPlants:HORVU7Hr1G089040.1};
TRINITY_DN178_c0_g1_i4	tr|A0A287X8S2|A0A287X8S2_HORVV	128	9.4e-63	248.8	58.9		A0A287X8S2_HORVV	Uncharacterized protein	SubName: Full=Uncharacterized protein {ECO:0000313|EnsemblPlants:HORVU7Hr1G089040.1};
TRINITY_DN178_c0_g1_i8	tr|A0A287X8S2|A0A287X8S2_HORVV	128	1.1e-63	252.3	42.4		A0A287X8S2_HORVV	Uncharacterized protein	SubName: Full=Uncharacterized protein {ECO:0000313|EnsemblPlants:HORVU7Hr1G089040.1};
TRINITY_DN178_c0_g1_i7	tr|A0A287X8S2|A0A287X8S2_HORVV	122	1.7e-64	254.6	55.2		A0A287X8S2_HORVV	Uncharacterized protein	SubName: Full=Uncharacterized protein {ECO:0000313|EnsemblPlants:HORVU7Hr1G089040.1};
TRINITY_DN178_c0_g1_i5	tr|A0A287X8S2|A0A287X8S2_HORVV	128	3e-62	247.7	41.5		A0A287X8S2_HORVV	Uncharacterized protein	SubName: Full=Uncharacterized protein {ECO:0000313|EnsemblPlants:HORVU7Hr1G089040.1};
TRINITY_DN178_c0_g1_i3	tr|A0A287X8S2|A0A287X8S2_HORVV	128	9.1e-64	252.3	52.9		A0A287X8S2_HORVV	Uncharacterized protein	SubName: Full=Uncharacterized protein {ECO:0000313|EnsemblPlants:HORVU7Hr1G089040.1};
TRINITY_DN178_c0_g1_i10	tr|A0A287X8S2|A0A287X8S2_HORVV	128	6.5e-64	253.1	43.6		A0A287X8S2_HORVV	Uncharacterized protein	SubName: Full=Uncharacterized protein {ECO:0000313|EnsemblPlants:HORVU7Hr1G089040.1};
TRINITY_DN189_c0_g1_i1	tr|A0A1D5X240|A0A1D5X240_WHEAT	59	4.7e-24	120.9	17.2		A0A1D5X240_WHEAT	Phosphatidylinositol 4-phosphate 5-kinase	RecName: Full=Phosphatidylinositol 4-phosphate 5-kinase {ECO:0000256|PIRNR:PIRNR037274}; EC=2.7.1.68 {ECO:0000256|PIRNR:PIRNR037274};
TRINITY_DN189_c0_g2_i3	tr|W5E8R9|W5E8R9_WHEAT	522	3e-310	1073.2	59.2		W5E8R9_WHEAT	Phosphatidylinositol 4-phosphate 5-kinase	RecName: Full=Phosphatidylinositol 4-phosphate 5-kinase {ECO:0000256|PIRNR:PIRNR037274}; EC=2.7.1.68 {ECO:0000256|PIRNR:PIRNR037274};
TRINITY_DN189_c0_g2_i1	tr|W5E8R9|W5E8R9_WHEAT	522	3e-310	1073.2	60.3		W5E8R9_WHEAT	Phosphatidylinositol 4-phosphate 5-kinase	RecName: Full=Phosphatidylinositol 4-phosphate 5-kinase {ECO:0000256|PIRNR:PIRNR037274}; EC=2.7.1.68 {ECO:0000256|PIRNR:PIRNR037274};
TRINITY_DN189_c0_g2_i4	tr|W5E8R9|W5E8R9_WHEAT	522	2.8e-310	1073.2	63.9		W5E8R9_WHEAT	Phosphatidylinositol 4-phosphate 5-kinase	RecName: Full=Phosphatidylinositol 4-phosphate 5-kinase {ECO:0000256|PIRNR:PIRNR037274}; EC=2.7.1.68 {ECO:0000256|PIRNR:PIRNR037274};
TRINITY_DN189_c0_g2_i2	tr|W5E8R9|W5E8R9_WHEAT	522	2.8e-310	1073.2	62.9		W5E8R9_WHEAT	Phosphatidylinositol 4-phosphate 5-kinase	RecName: Full=Phosphatidylinositol 4-phosphate 5-kinase {ECO:0000256|PIRNR:PIRNR037274}; EC=2.7.1.68 {ECO:0000256|PIRNR:PIRNR037274};
TRINITY_DN121_c0_g1_i1	tr|A0A1D6C0Q3|A0A1D6C0Q3_WHEAT	69	8.5e-18	97.8	99		A0A1D6C0Q3_WHEAT	Uncharacterized protein	SubName: Full=Uncharacterized protein {ECO:0000313|EnsemblPlants:TRIAE_CS42_7AS_TGACv1_571466_AA1847900.1};
TRINITY_DN121_c0_g3_i3	tr|A0A1D6CYH0|A0A1D6CYH0_WHEAT	251	3.6e-120	439.9	90.9		A0A1D6CYH0_WHEAT	Uncharacterized protein	SubName: Full=Uncharacterized protein {ECO:0000313|EnsemblPlants:TRIAE_CS42_7DS_TGACv1_621858_AA2027820.1};
TRINITY_DN121_c0_g3_i6	tr|A0A1D6C0Q3|A0A1D6C0Q3_WHEAT	251	1.3e-117	431.4	90.9		A0A1D6C0Q3_WHEAT	Uncharacterized protein	SubName: Full=Uncharacterized protein {ECO:0000313|EnsemblPlants:TRIAE_CS42_7AS_TGACv1_571466_AA1847900.1};
TRINITY_DN121_c0_g3_i4	tr|A0A1D6C0Q3|A0A1D6C0Q3_WHEAT	251	3.8e-119	436.8	74.6		A0A1D6C0Q3_WHEAT	Uncharacterized protein	SubName: Full=Uncharacterized protein {ECO:0000313|EnsemblPlants:TRIAE_CS42_7AS_TGACv1_571466_AA1847900.1};
TRINITY_DN121_c0_g3_i5	tr|A0A1D6CYH0|A0A1D6CYH0_WHEAT	251	7.6e-119	435.6	82.1		A0A1D6CYH0_WHEAT	Uncharacterized protein	SubName: Full=Uncharacterized protein {ECO:0000313|EnsemblPlants:TRIAE_CS42_7DS_TGACv1_621858_AA2027820.1};
TRINITY_DN121_c0_g3_i1	tr|A0A1D6CYH0|A0A1D6CYH0_WHEAT	251	3.7e-119	436.8	75.7		A0A1D6CYH0_WHEAT	Uncharacterized protein	SubName: Full=Uncharacterized protein {ECO:0000313|EnsemblPlants:TRIAE_CS42_7DS_TGACv1_621858_AA2027820.1};
TRINITY_DN121_c1_g1_i1	tr|A0A0A9DSG9|A0A0A9DSG9_ARUDO	50	4.1e-07	62.4	70.1		A0A0A9DSG9_ARUDO	Uncharacterized protein	SubName: Full=Uncharacterized protein {ECO:0000313|EMBL:JAD86722.1};
TRINITY_DN121_c1_g1_i2	tr|A0A0A9DSG9|A0A0A9DSG9_ARUDO	90	3.8e-12	79.7	79.3		A0A0A9DSG9_ARUDO	Uncharacterized protein	SubName: Full=Uncharacterized protein {ECO:0000313|EMBL:JAD86722.1};
TRINITY_DN182_c0_g1_i5	tr|A0A1D6DEA4|A0A1D6DEA4_WHEAT	1923	0	3310.8	88.8		A0A1D6DEA4_WHEAT	Uncharacterized protein	SubName: Full=Uncharacterized protein {ECO:0000313|EnsemblPlants:TRIAE_CS42_U_TGACv1_642010_AA2109350.5};
TRINITY_DN182_c0_g1_i6	tr|A0A1D6DEA4|A0A1D6DEA4_WHEAT	1923	0	3310.8	89.9		A0A1D6DEA4_WHEAT	Uncharacterized protein	SubName: Full=Uncharacterized protein {ECO:0000313|EnsemblPlants:TRIAE_CS42_U_TGACv1_642010_AA2109350.5};
TRINITY_DN182_c0_g1_i1	tr|A0A1D6DEA4|A0A1D6DEA4_WHEAT	1923	0	3312.3	89.4		A0A1D6DEA4_WHEAT	Uncharacterized protein	SubName: Full=Uncharacterized protein {ECO:0000313|EnsemblPlants:TRIAE_CS42_U_TGACv1_642010_AA2109350.5};
TRINITY_DN182_c0_g1_i4	tr|A0A1D6DEA4|A0A1D6DEA4_WHEAT	1923	0	3311.2	93.4		A0A1D6DEA4_WHEAT	Uncharacterized protein	SubName: Full=Uncharacterized protein {ECO:0000313|EnsemblPlants:TRIAE_CS42_U_TGACv1_642010_AA2109350.5};
TRINITY_DN182_c0_g1_i8	tr|A0A1D6DEA4|A0A1D6DEA4_WHEAT	1923	0	3310.8	93.5		A0A1D6DEA4_WHEAT	Uncharacterized protein	SubName: Full=Uncharacterized protein {ECO:0000313|EnsemblPlants:TRIAE_CS42_U_TGACv1_642010_AA2109350.5};
TRINITY_DN182_c0_g1_i7	tr|A0A1D6DEA4|A0A1D6DEA4_WHEAT	1422	0	2310.8	77.2		A0A1D6DEA4_WHEAT	Uncharacterized protein	SubName: Full=Uncharacterized protein {ECO:0000313|EnsemblPlants:TRIAE_CS42_U_TGACv1_642010_AA2109350.5};
TRINITY_DN172_c0_g1_i3	tr|W5BI29|W5BI29_WHEAT	399	2.4e-221	777.3	58.7		W5BI29_WHEAT	Uncharacterized protein	SubName: Full=Uncharacterized protein {ECO:0000313|EnsemblPlants:TRIAE_CS42_2BS_TGACv1_148429_AA0492780.1};
TRINITY_DN172_c0_g1_i5	tr|A0A1D5UWA7|A0A1D5UWA7_WHEAT	409	1.4e-225	791.6	51.8		A0A1D5UWA7_WHEAT	Uncharacterized protein	SubName: Full=Uncharacterized protein {ECO:0000313|EnsemblPlants:TRIAE_CS42_2DS_TGACv1_177392_AA0575430.1};
TRINITY_DN172_c0_g1_i12	tr|A0A1D5TM12|A0A1D5TM12_WHEAT	414	2.8e-218	766.9	68.1		A0A1D5TM12_WHEAT	Uncharacterized protein	SubName: Full=Uncharacterized protein {ECO:0000313|EnsemblPlants:TRIAE_CS42_2AS_TGACv1_112938_AA0348130.2};
TRINITY_DN172_c0_g1_i7	tr|W5BI29|W5BI29_WHEAT	399	2.6e-224	787.3	51		W5BI29_WHEAT	Uncharacterized protein	SubName: Full=Uncharacterized protein {ECO:0000313|EnsemblPlants:TRIAE_CS42_2BS_TGACv1_148429_AA0492780.1};
TRINITY_DN172_c0_g1_i2	tr|A0A1D5UWA7|A0A1D5UWA7_WHEAT	409	1.6e-224	788.1	52		A0A1D5UWA7_WHEAT	Uncharacterized protein	SubName: Full=Uncharacterized protein {ECO:0000313|EnsemblPlants:TRIAE_CS42_2DS_TGACv1_177392_AA0575430.1};
TRINITY_DN172_c0_g1_i13	tr|W5BI29|W5BI29_WHEAT	399	2.9e-223	783.5	67.4		W5BI29_WHEAT	Uncharacterized protein	SubName: Full=Uncharacterized protein {ECO:0000313|EnsemblPlants:TRIAE_CS42_2BS_TGACv1_148429_AA0492780.1};
TRINITY_DN172_c0_g1_i9	tr|W5BI29|W5BI29_WHEAT	211	1.9e-108	400.6	99.5		W5BI29_WHEAT	Uncharacterized protein	SubName: Full=Uncharacterized protein {ECO:0000313|EnsemblPlants:TRIAE_CS42_2BS_TGACv1_148429_AA0492780.1};
TRINITY_DN172_c0_g1_i8	tr|A0A1D5UWA7|A0A1D5UWA7_WHEAT	409	1.7e-223	784.3	68.7		A0A1D5UWA7_WHEAT	Uncharacterized protein	SubName: Full=Uncharacterized protein {ECO:0000313|EnsemblPlants:TRIAE_CS42_2DS_TGACv1_177392_AA0575430.1};
TRINITY_DN172_c0_g1_i10	tr|W5BI29|W5BI29_WHEAT	399	3e-224	786.9	57.6		W5BI29_WHEAT	Uncharacterized protein	SubName: Full=Uncharacterized protein {ECO:0000313|EnsemblPlants:TRIAE_CS42_2BS_TGACv1_148429_AA0492780.1};
TRINITY_DN176_c0_g1_i14	tr|A0A1D5YQD3|A0A1D5YQD3_WHEAT	91	4.9e-44	187.6	21.9		A0A1D5YQD3_WHEAT	Uncharacterized protein	SubName: Full=Uncharacterized protein {ECO:0000313|EnsemblPlants:TRIAE_CS42_5AL_TGACv1_377946_AA1250450.1};
TRINITY_DN176_c0_g1_i8	tr|A0A1D5YQD3|A0A1D5YQD3_WHEAT	91	4.8e-44	187.6	22.5		A0A1D5YQD3_WHEAT	Uncharacterized protein	SubName: Full=Uncharacterized protein {ECO:0000313|EnsemblPlants:TRIAE_CS42_5AL_TGACv1_377946_AA1250450.1};
TRINITY_DN176_c0_g1_i11	tr|M8AFL5|M8AFL5_TRIUA	27	0.00032	54.7	10.1	ORFNames=TRIUR3_18913 {ECO:0000313|EMBL:EMS59454.1};	M8AFL5_TRIUA	Uncharacterized protein	SubName: Full=Uncharacterized protein {ECO:0000313|EMBL:EMS59454.1, ECO:0000313|EnsemblPlants:TRIUR3_18913-P1};
TRINITY_DN176_c0_g1_i2	tr|A0A1D5YQD3|A0A1D5YQD3_WHEAT	101	2.3e-44	191	4.8		A0A1D5YQD3_WHEAT	Uncharacterized protein	SubName: Full=Uncharacterized protein {ECO:0000313|EnsemblPlants:TRIAE_CS42_5AL_TGACv1_377946_AA1250450.1};
TRINITY_DN176_c0_g1_i6	tr|A0A1D5YQD3|A0A1D5YQD3_WHEAT	101	2.1e-44	191	5.1		A0A1D5YQD3_WHEAT	Uncharacterized protein	SubName: Full=Uncharacterized protein {ECO:0000313|EnsemblPlants:TRIAE_CS42_5AL_TGACv1_377946_AA1250450.1};
TRINITY_DN176_c0_g1_i15	tr|A0A1D5YQD3|A0A1D5YQD3_WHEAT	101	1.7e-44	191	6.4		A0A1D5YQD3_WHEAT	Uncharacterized protein	SubName: Full=Uncharacterized protein {ECO:0000313|EnsemblPlants:TRIAE_CS42_5AL_TGACv1_377946_AA1250450.1};
TRINITY_DN176_c0_g1_i7	tr|A0A1D5ZIC0|A0A1D5ZIC0_WHEAT	211	1.3e-71	281.2	12.3		A0A1D5ZIC0_WHEAT	Uncharacterized protein	SubName: Full=Uncharacterized protein {ECO:0000313|EnsemblPlants:TRIAE_CS42_5BS_TGACv1_427448_AA1393420.1};
TRINITY_DN176_c0_g1_i13	tr|A0A1D5YQD3|A0A1D5YQD3_WHEAT	91	9.3e-44	187.6	11.5		A0A1D5YQD3_WHEAT	Uncharacterized protein	SubName: Full=Uncharacterized protein {ECO:0000313|EnsemblPlants:TRIAE_CS42_5AL_TGACv1_377946_AA1250450.1};
TRINITY_DN176_c0_g1_i3	tr|A0A1D5YQD3|A0A1D5YQD3_WHEAT	101	1.8e-44	191	6		A0A1D5YQD3_WHEAT	Uncharacterized protein	SubName: Full=Uncharacterized protein {ECO:0000313|EnsemblPlants:TRIAE_CS42_5AL_TGACv1_377946_AA1250450.1};
TRINITY_DN176_c0_g1_i1	tr|A0A1D5ZIC0|A0A1D5ZIC0_WHEAT	211	9.8e-72	280	37.7		A0A1D5ZIC0_WHEAT	Uncharacterized protein	SubName: Full=Uncharacterized protein {ECO:0000313|EnsemblPlants:TRIAE_CS42_5BS_TGACv1_427448_AA1393420.1};
TRINITY_DN176_c0_g1_i4	tr|M8A7C0|M8A7C0_TRIUA	298	8.9e-44	188	30	ORFNames=TRIUR3_26525 {ECO:0000313|EMBL:EMS60555.1};	M8A7C0_TRIUA	Uncharacterized protein	SubName: Full=Uncharacterized protein {ECO:0000313|EMBL:EMS60555.1, ECO:0000313|EnsemblPlants:TRIUR3_26525-P1};
TRINITY_DN176_c0_g1_i12	tr|A0A1D5YQD3|A0A1D5YQD3_WHEAT	101	1.5e-44	191	7.2		A0A1D5YQD3_WHEAT	Uncharacterized protein	SubName: Full=Uncharacterized protein {ECO:0000313|EnsemblPlants:TRIAE_CS42_5AL_TGACv1_377946_AA1250450.1};
TRINITY_DN176_c0_g1_i9	tr|M8AFL5|M8AFL5_TRIUA	27	0.0004	54.7	8.1	ORFNames=TRIUR3_18913 {ECO:0000313|EMBL:EMS59454.1};	M8AFL5_TRIUA	Uncharacterized protein	SubName: Full=Uncharacterized protein {ECO:0000313|EMBL:EMS59454.1, ECO:0000313|EnsemblPlants:TRIUR3_18913-P1};
TRINITY_DN176_c0_g2_i1	tr|A0A1D5UGY0|A0A1D5UGY0_WHEAT	257	4.3e-128	466.5	78		A0A1D5UGY0_WHEAT	Uncharacterized protein	SubName: Full=Uncharacterized protein {ECO:0000313|EnsemblPlants:TRIAE_CS42_2DL_TGACv1_158020_AA0506210.2};
TRINITY_DN176_c1_g1_i1	tr|A0A1D6D798|A0A1D6D798_WHEAT	285	9.3e-116	426	59.9		A0A1D6D798_WHEAT	Uncharacterized protein	SubName: Full=Uncharacterized protein {ECO:0000313|EnsemblPlants:TRIAE_CS42_U_TGACv1_640781_AA2073910.1};
TRINITY_DN176_c1_g1_i5	tr|A0A1D6D798|A0A1D6D798_WHEAT	365	1.2e-129	472.6	54.2		A0A1D6D798_WHEAT	Uncharacterized protein	SubName: Full=Uncharacterized protein {ECO:0000313|EnsemblPlants:TRIAE_CS42_U_TGACv1_640781_AA2073910.1};
TRINITY_DN176_c1_g1_i3	tr|A0A1D5Y3Y2|A0A1D5Y3Y2_WHEAT	364	7.2e-138	500	53.9		A0A1D5Y3Y2_WHEAT	Uncharacterized protein	SubName: Full=Uncharacterized protein {ECO:0000313|EnsemblPlants:TRIAE_CS42_4DL_TGACv1_345077_AA1151430.1};
TRINITY_DN176_c1_g1_i4	tr|A0A1D5Y3Y2|A0A1D5Y3Y2_WHEAT	207	4.2e-98	367.1	52.9		A0A1D5Y3Y2_WHEAT	Uncharacterized protein	SubName: Full=Uncharacterized protein {ECO:0000313|EnsemblPlants:TRIAE_CS42_4DL_TGACv1_345077_AA1151430.1};
TRINITY_DN176_c1_g1_i2	tr|A0A1D6D798|A0A1D6D798_WHEAT	365	1.2e-129	472.6	54		A0A1D6D798_WHEAT	Uncharacterized protein	SubName: Full=Uncharacterized protein {ECO:0000313|EnsemblPlants:TRIAE_CS42_U_TGACv1_640781_AA2073910.1};
TRINITY_DN187_c0_g1_i1	tr|Q2TN80|Q2TN80_WHEAT	139	2.4e-56	227.3	76.7	Name=EREB1 {ECO:0000313|EMBL:AAX13280.1};	Q2TN80_WHEAT	Ethylene-responsive element binding protein 1	SubName: Full=Ethylene-responsive element binding protein 1 {ECO:0000313|EMBL:AAX13280.1, ECO:0000313|EnsemblPlants:TRIAE_CS42_7BS_TGACv1_594836_AA1958510.1};
TRINITY_DN187_c0_g1_i2	tr|A0A1D6D258|A0A1D6D258_WHEAT	166	7.8e-66	258.8	89.2		A0A1D6D258_WHEAT	Uncharacterized protein	SubName: Full=Uncharacterized protein {ECO:0000313|EnsemblPlants:TRIAE_CS42_7DS_TGACv1_622899_AA2046950.1};
TRINITY_DN187_c1_g1_i6	tr|K4GPS6|K4GPS6_WHEAT	386	8.9e-182	645.6	67.9	Name=ERF5a {ECO:0000313|EMBL:AFP49824.1};	K4GPS6_WHEAT	Ethylene responsive transcription factor 5a	SubName: Full=Ethylene responsive transcription factor 5a {ECO:0000313|EMBL:AFP49824.1, ECO:0000313|EnsemblPlants:TRIAE_CS42_5BL_TGACv1_406843_AA1350490.1};
TRINITY_DN187_c1_g1_i2	tr|A0A1D6S8W8|A0A1D6S8W8_WHEAT	413	4.7e-138	500.4	68		A0A1D6S8W8_WHEAT	Uncharacterized protein	SubName: Full=Uncharacterized protein {ECO:0000313|EnsemblPlants:TRIAE_CS42_6BL_TGACv1_499444_AA1582630.3};
TRINITY_DN187_c1_g1_i7	tr|K4GPS6|K4GPS6_WHEAT	386	6.8e-182	646	68	Name=ERF5a {ECO:0000313|EMBL:AFP49824.1};	K4GPS6_WHEAT	Ethylene responsive transcription factor 5a	SubName: Full=Ethylene responsive transcription factor 5a {ECO:0000313|EMBL:AFP49824.1, ECO:0000313|EnsemblPlants:TRIAE_CS42_5BL_TGACv1_406843_AA1350490.1};
TRINITY_DN187_c1_g1_i9	tr|K4GPS6|K4GPS6_WHEAT	386	6.8e-182	646	67.4	Name=ERF5a {ECO:0000313|EMBL:AFP49824.1};	K4GPS6_WHEAT	Ethylene responsive transcription factor 5a	SubName: Full=Ethylene responsive transcription factor 5a {ECO:0000313|EMBL:AFP49824.1, ECO:0000313|EnsemblPlants:TRIAE_CS42_5BL_TGACv1_406843_AA1350490.1};
TRINITY_DN187_c1_g1_i3	tr|W5GAN0|W5GAN0_WHEAT	398	8.1e-207	728.8	69.9		W5GAN0_WHEAT	Uncharacterized protein	SubName: Full=Uncharacterized protein {ECO:0000313|EnsemblPlants:TRIAE_CS42_6AL_TGACv1_474109_AA1534140.2};
TRINITY_DN187_c1_g1_i5	tr|K4GPS6|K4GPS6_WHEAT	386	9e-182	645.6	67.3	Name=ERF5a {ECO:0000313|EMBL:AFP49824.1};	K4GPS6_WHEAT	Ethylene responsive transcription factor 5a	SubName: Full=Ethylene responsive transcription factor 5a {ECO:0000313|EMBL:AFP49824.1, ECO:0000313|EnsemblPlants:TRIAE_CS42_5BL_TGACv1_406843_AA1350490.1};
TRINITY_DN187_c1_g1_i10	tr|K4GPS6|K4GPS6_WHEAT	386	2.7e-182	647.1	77.1	Name=ERF5a {ECO:0000313|EMBL:AFP49824.1};	K4GPS6_WHEAT	Ethylene responsive transcription factor 5a	SubName: Full=Ethylene responsive transcription factor 5a {ECO:0000313|EMBL:AFP49824.1, ECO:0000313|EnsemblPlants:TRIAE_CS42_5BL_TGACv1_406843_AA1350490.1};
TRINITY_DN187_c1_g1_i4	tr|A0A1D6S8W8|A0A1D6S8W8_WHEAT	413	4.7e-138	500.4	67.4		A0A1D6S8W8_WHEAT	Uncharacterized protein	SubName: Full=Uncharacterized protein {ECO:0000313|EnsemblPlants:TRIAE_CS42_6BL_TGACv1_499444_AA1582630.3};
TRINITY_DN187_c1_g1_i8	tr|K4GPS6|K4GPS6_WHEAT	386	2.7e-182	647.1	77.9	Name=ERF5a {ECO:0000313|EMBL:AFP49824.1};	K4GPS6_WHEAT	Ethylene responsive transcription factor 5a	SubName: Full=Ethylene responsive transcription factor 5a {ECO:0000313|EMBL:AFP49824.1, ECO:0000313|EnsemblPlants:TRIAE_CS42_5BL_TGACv1_406843_AA1350490.1};
TRINITY_DN115_c0_g1_i1	tr|A0A1D5U466|A0A1D5U466_WHEAT	305	4.2e-159	570.1	61.8		A0A1D5U466_WHEAT	Uncharacterized protein	SubName: Full=Uncharacterized protein {ECO:0000313|EnsemblPlants:TRIAE_CS42_2BL_TGACv1_131868_AA0433080.4};
TRINITY_DN115_c0_g1_i4	tr|A0A1D5TKW1|A0A1D5TKW1_WHEAT	350	1.2e-194	688	83.2		A0A1D5TKW1_WHEAT	Uncharacterized protein	SubName: Full=Uncharacterized protein {ECO:0000313|EnsemblPlants:TRIAE_CS42_2AS_TGACv1_112618_AA0342340.1};
TRINITY_DN115_c0_g1_i5	tr|A0A1D6JAB3|A0A1D6JAB3_MAIZE	393	9.9e-105	389.4	80.1	Name=100193998 {ECO:0000313|EnsemblPlants:Zm00001d025846_P002}; ORFNames=ZEAMMB73_Zm00001d025846 {ECO:0000313|EMBL:AQK44836.1};	A0A1D6JAB3_MAIZE	Beta-glucosidase 47	SubName: Full=Beta-glucosidase 47 {ECO:0000313|EMBL:AQK44836.1};
TRINITY_DN115_c0_g1_i8	tr|M7Y9P4|M7Y9P4_TRIUA	134	1.8e-38	168.7	42.9	ORFNames=TRIUR3_31393 {ECO:0000313|EMBL:EMS46808.1};	M7Y9P4_TRIUA	Beta-glucosidase 16	SubName: Full=Beta-glucosidase 16 {ECO:0000313|EMBL:EMS46808.1, ECO:0000313|EnsemblPlants:TRIUR3_31393-P1};
TRINITY_DN115_c0_g1_i2	tr|W5BF64|W5BF64_WHEAT	427	3.1e-239	836.3	85.8		W5BF64_WHEAT	Uncharacterized protein	SubName: Full=Uncharacterized protein {ECO:0000313|EnsemblPlants:TRIAE_CS42_2BL_TGACv1_131868_AA0433080.3};
TRINITY_DN115_c0_g1_i6	tr|W5ARW1|W5ARW1_WHEAT	500	1.8e-278	966.8	87.5		W5ARW1_WHEAT	Uncharacterized protein	SubName: Full=Uncharacterized protein {ECO:0000313|EnsemblPlants:TRIAE_CS42_2AL_TGACv1_093900_AA0288950.2};
TRINITY_DN115_c0_g1_i7	tr|M8CAX3|M8CAX3_AEGTA	199	5.9e-108	399.8	51.4	ORFNames=F775_18862 {ECO:0000313|EMBL:EMT31288.1};	M8CAX3_AEGTA	Beta-glucosidase 1	SubName: Full=Beta-glucosidase 1 {ECO:0000313|EMBL:EMT31288.1, ECO:0000313|EnsemblPlants:EMT31288};
TRINITY_DN115_c0_g1_i9	tr|A0A1D5TKW1|A0A1D5TKW1_WHEAT	350	2.9e-201	709.9	83.2		A0A1D5TKW1_WHEAT	Uncharacterized protein	SubName: Full=Uncharacterized protein {ECO:0000313|EnsemblPlants:TRIAE_CS42_2AS_TGACv1_112618_AA0342340.1};
TRINITY_DN115_c0_g1_i3	tr|M8CAX3|M8CAX3_AEGTA	199	1.7e-106	395.2	43.4	ORFNames=F775_18862 {ECO:0000313|EMBL:EMT31288.1};	M8CAX3_AEGTA	Beta-glucosidase 1	SubName: Full=Beta-glucosidase 1 {ECO:0000313|EMBL:EMT31288.1, ECO:0000313|EnsemblPlants:EMT31288};
TRINITY_DN119_c0_g1_i19	tr|M8BXG6|M8BXG6_AEGTA	638	1.5e-114	422.9	63.1	ORFNames=F775_24445 {ECO:0000313|EMBL:EMT11524.1};	M8BXG6_AEGTA	Uncharacterized protein	SubName: Full=Uncharacterized protein {ECO:0000313|EMBL:EMT11524.1, ECO:0000313|EnsemblPlants:EMT11524};
TRINITY_DN119_c0_g1_i20	tr|A0A1D6D668|A0A1D6D668_WHEAT	243	7.2e-115	422.9	56.3		A0A1D6D668_WHEAT	Uncharacterized protein	SubName: Full=Uncharacterized protein {ECO:0000313|EnsemblPlants:TRIAE_CS42_7DS_TGACv1_626610_AA2066850.1};
TRINITY_DN119_c0_g1_i10	tr|A0A1D5Z6V3|A0A1D5Z6V3_WHEAT	312	5.3e-160	572.4	99.7		A0A1D5Z6V3_WHEAT	Uncharacterized protein	SubName: Full=Uncharacterized protein {ECO:0000313|EnsemblPlants:TRIAE_CS42_5BL_TGACv1_405778_AA1335120.1};
TRINITY_DN119_c0_g1_i15	tr|M7YZ62|M7YZ62_TRIUA	447	6.9e-205	723	50.3	ORFNames=TRIUR3_33653 {ECO:0000313|EMBL:EMS52952.1};	M7YZ62_TRIUA	Uncharacterized protein	SubName: Full=Uncharacterized protein {ECO:0000313|EMBL:EMS52952.1, ECO:0000313|EnsemblPlants:TRIUR3_33653-P1};
TRINITY_DN119_c0_g1_i21	tr|A0A1D5Z6V5|A0A1D5Z6V5_WHEAT	602	1.3e-272	948	67.2		A0A1D5Z6V5_WHEAT	Uncharacterized protein	SubName: Full=Uncharacterized protein {ECO:0000313|EnsemblPlants:TRIAE_CS42_5BL_TGACv1_405778_AA1335120.3};
TRINITY_DN119_c0_g1_i2	tr|A0A1D5Z6V3|A0A1D5Z6V3_WHEAT	510	7.5e-229	802.7	52.8		A0A1D5Z6V3_WHEAT	Uncharacterized protein	SubName: Full=Uncharacterized protein {ECO:0000313|EnsemblPlants:TRIAE_CS42_5BL_TGACv1_405778_AA1335120.1};
TRINITY_DN119_c0_g1_i14	tr|A0A1D5X3Y9|A0A1D5X3Y9_WHEAT	223	2.6e-116	428.7	25.9		A0A1D5X3Y9_WHEAT	Uncharacterized protein	SubName: Full=Uncharacterized protein {ECO:0000313|EnsemblPlants:TRIAE_CS42_4AL_TGACv1_289557_AA0973100.2};
TRINITY_DN119_c0_g1_i4	tr|A0A1D5UJB1|A0A1D5UJB1_WHEAT	331	5.3e-147	530.8	35.3		A0A1D5UJB1_WHEAT	Uncharacterized protein	SubName: Full=Uncharacterized protein {ECO:0000313|EnsemblPlants:TRIAE_CS42_2DL_TGACv1_158434_AA0518630.1};
TRINITY_DN119_c0_g1_i22	tr|N1R256|N1R256_AEGTA	469	4.5e-102	381.3	57.4	ORFNames=F775_20660 {ECO:0000313|EMBL:EMT12892.1};	N1R256_AEGTA	Uncharacterized protein	SubName: Full=Uncharacterized protein {ECO:0000313|EMBL:EMT12892.1, ECO:0000313|EnsemblPlants:EMT12892};
TRINITY_DN119_c0_g1_i23	tr|M7YZ62|M7YZ62_TRIUA	220	2.2e-110	407.1	94.8	ORFNames=TRIUR3_33653 {ECO:0000313|EMBL:EMS52952.1};	M7YZ62_TRIUA	Uncharacterized protein	SubName: Full=Uncharacterized protein {ECO:0000313|EMBL:EMS52952.1, ECO:0000313|EnsemblPlants:TRIUR3_33653-P1};
TRINITY_DN119_c1_g1_i3	tr|M8BQN1|M8BQN1_AEGTA	151	3.6e-64	253.1	95	ORFNames=F775_05495 {ECO:0000313|EMBL:EMT27300.1};	M8BQN1_AEGTA	Uncharacterized protein	SubName: Full=Uncharacterized protein {ECO:0000313|EMBL:EMT27300.1, ECO:0000313|EnsemblPlants:EMT27300};
TRINITY_DN119_c1_g1_i1	tr|M8BQN1|M8BQN1_AEGTA	151	1.3e-66	261.2	94.6	ORFNames=F775_05495 {ECO:0000313|EMBL:EMT27300.1};	M8BQN1_AEGTA	Uncharacterized protein	SubName: Full=Uncharacterized protein {ECO:0000313|EMBL:EMT27300.1, ECO:0000313|EnsemblPlants:EMT27300};
TRINITY_DN119_c1_g1_i5	tr|M8BQN1|M8BQN1_AEGTA	151	1.1e-63	251.5	95	ORFNames=F775_05495 {ECO:0000313|EMBL:EMT27300.1};	M8BQN1_AEGTA	Uncharacterized protein	SubName: Full=Uncharacterized protein {ECO:0000313|EMBL:EMT27300.1, ECO:0000313|EnsemblPlants:EMT27300};
TRINITY_DN119_c1_g1_i2	tr|M8BQN1|M8BQN1_AEGTA	107	2.8e-44	186.4	99.7	ORFNames=F775_05495 {ECO:0000313|EMBL:EMT27300.1};	M8BQN1_AEGTA	Uncharacterized protein	SubName: Full=Uncharacterized protein {ECO:0000313|EMBL:EMT27300.1, ECO:0000313|EnsemblPlants:EMT27300};
TRINITY_DN119_c1_g1_i4	tr|M8C9S5|M8C9S5_AEGTA	132	8.9e-56	224.9	99	ORFNames=F775_15914 {ECO:0000313|EMBL:EMT31069.1};	M8C9S5_AEGTA	Uncharacterized protein	SubName: Full=Uncharacterized protein {ECO:0000313|EMBL:EMT31069.1, ECO:0000313|EnsemblPlants:EMT31069};
TRINITY_DN119_c1_g2_i2	tr|M8BXG6|M8BXG6_AEGTA	41	1.4e-10	75.1	24.9	ORFNames=F775_24445 {ECO:0000313|EMBL:EMT11524.1};	M8BXG6_AEGTA	Uncharacterized protein	SubName: Full=Uncharacterized protein {ECO:0000313|EMBL:EMT11524.1, ECO:0000313|EnsemblPlants:EMT11524};
TRINITY_DN133_c0_g1_i3	tr|A0A1D6CIP0|A0A1D6CIP0_WHEAT	118	1.9e-43	184.5	61.8		A0A1D6CIP0_WHEAT	Uncharacterized protein	SubName: Full=Uncharacterized protein {ECO:0000313|EnsemblPlants:TRIAE_CS42_7BS_TGACv1_593233_AA1949640.1};
TRINITY_DN133_c0_g1_i1	tr|A0A1D6CIP0|A0A1D6CIP0_WHEAT	118	1.2e-43	185.7	43.3		A0A1D6CIP0_WHEAT	Uncharacterized protein	SubName: Full=Uncharacterized protein {ECO:0000313|EnsemblPlants:TRIAE_CS42_7BS_TGACv1_593233_AA1949640.1};
TRINITY_DN133_c0_g1_i2	tr|A0A1D6CIP0|A0A1D6CIP0_WHEAT	118	1.5e-43	185.3	45.4		A0A1D6CIP0_WHEAT	Uncharacterized protein	SubName: Full=Uncharacterized protein {ECO:0000313|EnsemblPlants:TRIAE_CS42_7BS_TGACv1_593233_AA1949640.1};
TRINITY_DN133_c0_g2_i1	tr|A0A287VR67|A0A287VR67_HORVV	51	1.6e-10	75.1	26.8		A0A287VR67_HORVV	Uncharacterized protein	SubName: Full=Uncharacterized protein {ECO:0000313|EnsemblPlants:HORVU7Hr1G025320.1};
TRINITY_DN133_c1_g1_i2	tr|A0A1D5Y195|A0A1D5Y195_WHEAT	263	5.8e-136	492.7	78.1		A0A1D5Y195_WHEAT	Uncharacterized protein	SubName: Full=Uncharacterized protein {ECO:0000313|EnsemblPlants:TRIAE_CS42_4DL_TGACv1_343746_AA1139080.4};
TRINITY_DN133_c1_g1_i4	tr|A0A1D5Y195|A0A1D5Y195_WHEAT	263	6.6e-136	492.7	68.8		A0A1D5Y195_WHEAT	Uncharacterized protein	SubName: Full=Uncharacterized protein {ECO:0000313|EnsemblPlants:TRIAE_CS42_4DL_TGACv1_343746_AA1139080.4};
TRINITY_DN133_c1_g1_i1	tr|A0A1D5Y195|A0A1D5Y195_WHEAT	263	7e-136	492.7	63.9		A0A1D5Y195_WHEAT	Uncharacterized protein	SubName: Full=Uncharacterized protein {ECO:0000313|EnsemblPlants:TRIAE_CS42_4DL_TGACv1_343746_AA1139080.4};
TRINITY_DN133_c1_g1_i3	tr|A0A1D5Y195|A0A1D5Y195_WHEAT	263	7.3e-136	492.7	62.1		A0A1D5Y195_WHEAT	Uncharacterized protein	SubName: Full=Uncharacterized protein {ECO:0000313|EnsemblPlants:TRIAE_CS42_4DL_TGACv1_343746_AA1139080.4};
TRINITY_DN165_c1_g1_i3	tr|A0A1D6RL11|A0A1D6RL11_WHEAT	40	2.5e-07	66.2	6.3		A0A1D6RL11_WHEAT	Uncharacterized protein	SubName: Full=Uncharacterized protein {ECO:0000313|EnsemblPlants:TRIAE_CS42_2BL_TGACv1_130173_AA0405530.1};
TRINITY_DN165_c1_g1_i2	tr|A0A1D6RL11|A0A1D6RL11_WHEAT	40	2.6e-07	66.2	6		A0A1D6RL11_WHEAT	Uncharacterized protein	SubName: Full=Uncharacterized protein {ECO:0000313|EnsemblPlants:TRIAE_CS42_2BL_TGACv1_130173_AA0405530.1};
TRINITY_DN165_c1_g1_i1	tr|A0A1D6RL11|A0A1D6RL11_WHEAT	40	2.6e-07	66.2	6.1		A0A1D6RL11_WHEAT	Uncharacterized protein	SubName: Full=Uncharacterized protein {ECO:0000313|EnsemblPlants:TRIAE_CS42_2BL_TGACv1_130173_AA0405530.1};
TRINITY_DN104_c0_g1_i5	tr|A0A1D5S9N5|A0A1D5S9N5_WHEAT	443	1.3e-236	827.8	75		A0A1D5S9N5_WHEAT	Mitogen-activated protein kinase	RecName: Full=Mitogen-activated protein kinase {ECO:0000256|SAAS:SAAS00652812}; EC=2.7.11.24 {ECO:0000256|SAAS:SAAS00652812};
TRINITY_DN104_c0_g1_i1	tr|A0A1D5SZ70|A0A1D5SZ70_WHEAT	439	9.4e-235	821.6	75.2		A0A1D5SZ70_WHEAT	Mitogen-activated protein kinase	RecName: Full=Mitogen-activated protein kinase {ECO:0000256|SAAS:SAAS00652812}; EC=2.7.11.24 {ECO:0000256|SAAS:SAAS00652812};
TRINITY_DN104_c0_g1_i3	tr|A0A1D5SZ70|A0A1D5SZ70_WHEAT	439	3.6e-234	819.7	75		A0A1D5SZ70_WHEAT	Mitogen-activated protein kinase	RecName: Full=Mitogen-activated protein kinase {ECO:0000256|SAAS:SAAS00652812}; EC=2.7.11.24 {ECO:0000256|SAAS:SAAS00652812};
TRINITY_DN104_c0_g1_i6	tr|A0A1D5SZ70|A0A1D5SZ70_WHEAT	439	2e-233	817	87		A0A1D5SZ70_WHEAT	Mitogen-activated protein kinase	RecName: Full=Mitogen-activated protein kinase {ECO:0000256|SAAS:SAAS00652812}; EC=2.7.11.24 {ECO:0000256|SAAS:SAAS00652812};
TRINITY_DN131_c0_g1_i4	tr|W5FPG9|W5FPG9_WHEAT	314	1.3e-174	621.7	58		W5FPG9_WHEAT	Uncharacterized protein	SubName: Full=Uncharacterized protein {ECO:0000313|EnsemblPlants:TRIAE_CS42_5BS_TGACv1_423579_AA1379910.1};
TRINITY_DN131_c0_g1_i1	tr|W5F637|W5F637_WHEAT	314	5.1e-174	619.8	57.5		W5F637_WHEAT	Uncharacterized protein	SubName: Full=Uncharacterized protein {ECO:0000313|EnsemblPlants:TRIAE_CS42_5AS_TGACv1_393898_AA1277030.2};
TRINITY_DN131_c0_g1_i2	tr|W5F637|W5F637_WHEAT	314	5.1e-174	619.8	57.8		W5F637_WHEAT	Uncharacterized protein	SubName: Full=Uncharacterized protein {ECO:0000313|EnsemblPlants:TRIAE_CS42_5AS_TGACv1_393898_AA1277030.2};
TRINITY_DN131_c0_g1_i5	tr|W5F637|W5F637_WHEAT	314	1.3e-174	621.3	79.9		W5F637_WHEAT	Uncharacterized protein	SubName: Full=Uncharacterized protein {ECO:0000313|EnsemblPlants:TRIAE_CS42_5AS_TGACv1_393898_AA1277030.2};
TRINITY_DN131_c0_g1_i3	tr|W5F637|W5F637_WHEAT	314	5.1e-174	619.8	57.8		W5F637_WHEAT	Uncharacterized protein	SubName: Full=Uncharacterized protein {ECO:0000313|EnsemblPlants:TRIAE_CS42_5AS_TGACv1_393898_AA1277030.2};
TRINITY_DN131_c1_g1_i1	tr|A0A1D6AEA3|A0A1D6AEA3_WHEAT	68	3.5e-28	132.9	66.9		A0A1D6AEA3_WHEAT	Uncharacterized protein	SubName: Full=Uncharacterized protein {ECO:0000313|EnsemblPlants:TRIAE_CS42_6AS_TGACv1_485359_AA1543890.3};
TRINITY_DN131_c1_g1_i2	tr|A0A287R629|A0A287R629_HORVV	76	1.1e-28	134.8	63.3		A0A287R629_HORVV	Uncharacterized protein	SubName: Full=Uncharacterized protein {ECO:0000313|EnsemblPlants:HORVU5Hr1G050720.1};
TRINITY_DN114_c0_g1_i2	tr|W5A921|W5A921_WHEAT	200	2.3e-82	314.7	55.8		W5A921_WHEAT	Uncharacterized protein	SubName: Full=Uncharacterized protein {ECO:0000313|EnsemblPlants:TRIAE_CS42_1BS_TGACv1_050931_AA0176800.1};
TRINITY_DN114_c0_g1_i3	tr|W5A921|W5A921_WHEAT	261	3e-90	341.3	55.4		W5A921_WHEAT	Uncharacterized protein	SubName: Full=Uncharacterized protein {ECO:0000313|EnsemblPlants:TRIAE_CS42_1BS_TGACv1_050931_AA0176800.1};
TRINITY_DN114_c0_g1_i4	tr|M8B2S1|M8B2S1_AEGTA	200	5.9e-82	313.5	48	ORFNames=F775_09011 {ECO:0000313|EMBL:EMT07885.1};	M8B2S1_AEGTA	Uncharacterized protein	SubName: Full=Uncharacterized protein {ECO:0000313|EMBL:EMT07885.1, ECO:0000313|EnsemblPlants:EMT07885};
TRINITY_DN114_c0_g1_i1	tr|W5A921|W5A921_WHEAT	261	3.1e-90	341.3	54.1		W5A921_WHEAT	Uncharacterized protein	SubName: Full=Uncharacterized protein {ECO:0000313|EnsemblPlants:TRIAE_CS42_1BS_TGACv1_050931_AA0176800.1};
TRINITY_DN114_c0_g2_i1	tr|M8B2S1|M8B2S1_AEGTA	89	2.7e-15	90.1	85.6	ORFNames=F775_09011 {ECO:0000313|EMBL:EMT07885.1};	M8B2S1_AEGTA	Uncharacterized protein	SubName: Full=Uncharacterized protein {ECO:0000313|EMBL:EMT07885.1, ECO:0000313|EnsemblPlants:EMT07885};
TRINITY_DN105_c0_g1_i6	tr|R7WAL1|R7WAL1_AEGTA	189	3.3e-88	333.2	98.4	ORFNames=F775_17195 {ECO:0000313|EMBL:EMT16215.1};	R7WAL1_AEGTA	Homeobox protein HOX1A	SubName: Full=Homeobox protein HOX1A {ECO:0000313|EMBL:EMT16215.1, ECO:0000313|EnsemblPlants:EMT16215};
TRINITY_DN105_c0_g1_i5	tr|A0A1D5S788|A0A1D5S788_WHEAT	87	2.6e-43	183	98.9		A0A1D5S788_WHEAT	Uncharacterized protein	SubName: Full=Uncharacterized protein {ECO:0000313|EnsemblPlants:TRIAE_CS42_1BL_TGACv1_030511_AA0092850.4};
TRINITY_DN105_c0_g1_i4	tr|A0A1D5RT47|A0A1D5RT47_WHEAT	271	9.6e-142	512.3	59.3		A0A1D5RT47_WHEAT	Uncharacterized protein	SubName: Full=Uncharacterized protein {ECO:0000313|EnsemblPlants:TRIAE_CS42_1AL_TGACv1_000918_AA0021800.2};
TRINITY_DN105_c0_g1_i1	tr|A0A1D5RT47|A0A1D5RT47_WHEAT	271	9.7e-142	512.3	58.2		A0A1D5RT47_WHEAT	Uncharacterized protein	SubName: Full=Uncharacterized protein {ECO:0000313|EnsemblPlants:TRIAE_CS42_1AL_TGACv1_000918_AA0021800.2};
TRINITY_DN105_c0_g1_i3	tr|W5A1K7|W5A1K7_WHEAT	248	4.5e-127	463	79.6		W5A1K7_WHEAT	Uncharacterized protein	SubName: Full=Uncharacterized protein {ECO:0000313|EnsemblPlants:TRIAE_CS42_1BL_TGACv1_030511_AA0092850.2};
TRINITY_DN105_c0_g1_i2	tr|R7WAL1|R7WAL1_AEGTA	205	2.7e-91	344	74.6	ORFNames=F775_17195 {ECO:0000313|EMBL:EMT16215.1};	R7WAL1_AEGTA	Homeobox protein HOX1A	SubName: Full=Homeobox protein HOX1A {ECO:0000313|EMBL:EMT16215.1, ECO:0000313|EnsemblPlants:EMT16215};
TRINITY_DN105_c0_g1_i7	tr|W5A1K7|W5A1K7_WHEAT	271	6.2e-141	509.6	59		W5A1K7_WHEAT	Uncharacterized protein	SubName: Full=Uncharacterized protein {ECO:0000313|EnsemblPlants:TRIAE_CS42_1BL_TGACv1_030511_AA0092850.2};
TRINITY_DN105_c1_g1_i1	tr|A0A1D5RT47|A0A1D5RT47_WHEAT	83	8.3e-36	157.9	99.2		A0A1D5RT47_WHEAT	Uncharacterized protein	SubName: Full=Uncharacterized protein {ECO:0000313|EnsemblPlants:TRIAE_CS42_1AL_TGACv1_000918_AA0021800.2};
TRINITY_DN150_c0_g1_i5	tr|W5DQV9|W5DQV9_WHEAT	179	1.8e-96	360.5	98.9		W5DQV9_WHEAT	Adenylyl cyclase-associated protein	RecName: Full=Adenylyl cyclase-associated protein {ECO:0000256|RuleBase:RU000647};
TRINITY_DN150_c0_g1_i6	tr|W5ESI8|W5ESI8_WHEAT	237	1.8e-118	434.5	72.5		W5ESI8_WHEAT	Adenylyl cyclase-associated protein	RecName: Full=Adenylyl cyclase-associated protein {ECO:0000256|RuleBase:RU000647};
TRINITY_DN150_c0_g1_i4	tr|W5ESI8|W5ESI8_WHEAT	495	5.7e-247	862.4	71.4		W5ESI8_WHEAT	Adenylyl cyclase-associated protein	RecName: Full=Adenylyl cyclase-associated protein {ECO:0000256|RuleBase:RU000647};
TRINITY_DN150_c0_g1_i3	tr|W5ESI8|W5ESI8_WHEAT	495	8.4e-247	862.1	63.5		W5ESI8_WHEAT	Adenylyl cyclase-associated protein	RecName: Full=Adenylyl cyclase-associated protein {ECO:0000256|RuleBase:RU000647};
TRINITY_DN150_c0_g1_i7	tr|W5ESI8|W5ESI8_WHEAT	495	6.3e-247	862.1	83.5		W5ESI8_WHEAT	Adenylyl cyclase-associated protein	RecName: Full=Adenylyl cyclase-associated protein {ECO:0000256|RuleBase:RU000647};
TRINITY_DN150_c0_g1_i1	tr|W5ESI8|W5ESI8_WHEAT	495	5.7e-247	862.4	71.7		W5ESI8_WHEAT	Adenylyl cyclase-associated protein	RecName: Full=Adenylyl cyclase-associated protein {ECO:0000256|RuleBase:RU000647};
TRINITY_DN150_c1_g1_i1	tr|A0A1D6AG28|A0A1D6AG28_WHEAT	47	7.3e-16	91.7	56.4		A0A1D6AG28_WHEAT	Uncharacterized protein	SubName: Full=Uncharacterized protein {ECO:0000313|EnsemblPlants:TRIAE_CS42_6AS_TGACv1_485924_AA1554160.1};
TRINITY_DN150_c1_g1_i3	tr|A0A0A9E1A4|A0A0A9E1A4_ARUDO	46	9.7e-10	71.2	58		A0A0A9E1A4_ARUDO	Uncharacterized protein	SubName: Full=Uncharacterized protein {ECO:0000313|EMBL:JAD91670.1};
TRINITY_DN150_c1_g1_i2	tr|A0A0A9E1A4|A0A0A9E1A4_ARUDO	54	8.6e-15	88.2	61.4		A0A0A9E1A4_ARUDO	Uncharacterized protein	SubName: Full=Uncharacterized protein {ECO:0000313|EMBL:JAD91670.1};
TRINITY_DN150_c1_g1_i5	tr|A0A0A9E1A4|A0A0A9E1A4_ARUDO	49	9.6e-14	84.7	55.1		A0A0A9E1A4_ARUDO	Uncharacterized protein	SubName: Full=Uncharacterized protein {ECO:0000313|EMBL:JAD91670.1};
TRINITY_DN150_c1_g1_i6	tr|A0A0A9HBY4|A0A0A9HBY4_ARUDO	44	2.9e-13	84.3	21.7		A0A0A9HBY4_ARUDO	Uncharacterized protein	SubName: Full=Uncharacterized protein {ECO:0000313|EMBL:JAE30423.1};
TRINITY_DN150_c1_g1_i4	tr|A0A1D6AG28|A0A1D6AG28_WHEAT	47	1.5e-15	92	21.9		A0A1D6AG28_WHEAT	Uncharacterized protein	SubName: Full=Uncharacterized protein {ECO:0000313|EnsemblPlants:TRIAE_CS42_6AS_TGACv1_485924_AA1554160.1};
TRINITY_DN180_c0_g1_i3	tr|A0A1D5S313|A0A1D5S313_WHEAT	1246	0	2331.6	83.1		A0A1D5S313_WHEAT	Phospholipid-transporting ATPase	RecName: Full=Phospholipid-transporting ATPase {ECO:0000256|RuleBase:RU362033}; EC=3.6.3.1 {ECO:0000256|RuleBase:RU362033};
TRINITY_DN180_c0_g1_i5	tr|A0A1D5S313|A0A1D5S313_WHEAT	1246	0	2333.1	83.1		A0A1D5S313_WHEAT	Phospholipid-transporting ATPase	RecName: Full=Phospholipid-transporting ATPase {ECO:0000256|RuleBase:RU362033}; EC=3.6.3.1 {ECO:0000256|RuleBase:RU362033};
TRINITY_DN180_c0_g1_i1	tr|A0A1D5S313|A0A1D5S313_WHEAT	1246	0	2335.5	83.1		A0A1D5S313_WHEAT	Phospholipid-transporting ATPase	RecName: Full=Phospholipid-transporting ATPase {ECO:0000256|RuleBase:RU362033}; EC=3.6.3.1 {ECO:0000256|RuleBase:RU362033};
TRINITY_DN185_c0_g1_i5	tr|A0A1D6CHB5|A0A1D6CHB5_WHEAT	829	0	1598.2	84		A0A1D6CHB5_WHEAT	Uncharacterized protein	SubName: Full=Uncharacterized protein {ECO:0000313|EnsemblPlants:TRIAE_CS42_7BS_TGACv1_592666_AA1942810.2};
TRINITY_DN185_c0_g1_i2	tr|A0A1D6CHB5|A0A1D6CHB5_WHEAT	829	0	1599.7	83.3		A0A1D6CHB5_WHEAT	Uncharacterized protein	SubName: Full=Uncharacterized protein {ECO:0000313|EnsemblPlants:TRIAE_CS42_7BS_TGACv1_592666_AA1942810.2};
TRINITY_DN185_c0_g1_i4	tr|A0A1D6CHB5|A0A1D6CHB5_WHEAT	500	1.5e-273	950.3	99.9		A0A1D6CHB5_WHEAT	Uncharacterized protein	SubName: Full=Uncharacterized protein {ECO:0000313|EnsemblPlants:TRIAE_CS42_7BS_TGACv1_592666_AA1942810.2};
TRINITY_DN185_c0_g1_i7	tr|A0A1D6CHB5|A0A1D6CHB5_WHEAT	829	0	1597.8	78.3		A0A1D6CHB5_WHEAT	Uncharacterized protein	SubName: Full=Uncharacterized protein {ECO:0000313|EnsemblPlants:TRIAE_CS42_7BS_TGACv1_592666_AA1942810.2};
TRINITY_DN185_c0_g1_i10	tr|A0A1D6CHB5|A0A1D6CHB5_WHEAT	793	0	1529.6	87.9		A0A1D6CHB5_WHEAT	Uncharacterized protein	SubName: Full=Uncharacterized protein {ECO:0000313|EnsemblPlants:TRIAE_CS42_7BS_TGACv1_592666_AA1942810.2};
TRINITY_DN185_c0_g1_i9	tr|A0A1D6CHB5|A0A1D6CHB5_WHEAT	793	0	1531.2	87.9		A0A1D6CHB5_WHEAT	Uncharacterized protein	SubName: Full=Uncharacterized protein {ECO:0000313|EnsemblPlants:TRIAE_CS42_7BS_TGACv1_592666_AA1942810.2};
TRINITY_DN185_c0_g1_i1	tr|A0A1D6CHB5|A0A1D6CHB5_WHEAT	829	0	1599.7	78.1		A0A1D6CHB5_WHEAT	Uncharacterized protein	SubName: Full=Uncharacterized protein {ECO:0000313|EnsemblPlants:TRIAE_CS42_7BS_TGACv1_592666_AA1942810.2};
TRINITY_DN169_c0_g1_i7	tr|A0A1D6BAZ9|A0A1D6BAZ9_WHEAT	46	1.1e-16	95.5	25.4		A0A1D6BAZ9_WHEAT	Uncharacterized protein	SubName: Full=Uncharacterized protein {ECO:0000313|EnsemblPlants:TRIAE_CS42_6DL_TGACv1_529141_AA1717590.1};
TRINITY_DN169_c0_g1_i5	tr|A0A1D6BAZ9|A0A1D6BAZ9_WHEAT	25	0.0003	54.3	13.1		A0A1D6BAZ9_WHEAT	Uncharacterized protein	SubName: Full=Uncharacterized protein {ECO:0000313|EnsemblPlants:TRIAE_CS42_6DL_TGACv1_529141_AA1717590.1};
TRINITY_DN169_c0_g1_i2	tr|A0A1D6BAZ9|A0A1D6BAZ9_WHEAT	25	0.00029	54.3	13.4		A0A1D6BAZ9_WHEAT	Uncharacterized protein	SubName: Full=Uncharacterized protein {ECO:0000313|EnsemblPlants:TRIAE_CS42_6DL_TGACv1_529141_AA1717590.1};
TRINITY_DN126_c0_g1_i5	tr|M7ZDM4|M7ZDM4_TRIUA	42	1.2e-12	83.2	10.6	ORFNames=TRIUR3_24152 {ECO:0000313|EMBL:EMS57741.1};	M7ZDM4_TRIUA	Uncharacterized protein	SubName: Full=Uncharacterized protein {ECO:0000313|EMBL:EMS57741.1, ECO:0000313|EnsemblPlants:TRIUR3_24152-P1};
TRINITY_DN126_c0_g1_i2	tr|M7ZDM4|M7ZDM4_TRIUA	42	2.2e-12	83.2	5.9	ORFNames=TRIUR3_24152 {ECO:0000313|EMBL:EMS57741.1};	M7ZDM4_TRIUA	Uncharacterized protein	SubName: Full=Uncharacterized protein {ECO:0000313|EMBL:EMS57741.1, ECO:0000313|EnsemblPlants:TRIUR3_24152-P1};
TRINITY_DN126_c0_g1_i4	tr|M7ZDM4|M7ZDM4_TRIUA	42	1.3e-12	83.2	10.5	ORFNames=TRIUR3_24152 {ECO:0000313|EMBL:EMS57741.1};	M7ZDM4_TRIUA	Uncharacterized protein	SubName: Full=Uncharacterized protein {ECO:0000313|EMBL:EMS57741.1, ECO:0000313|EnsemblPlants:TRIUR3_24152-P1};
TRINITY_DN126_c0_g1_i3	tr|M7ZDM4|M7ZDM4_TRIUA	42	1.1e-12	83.2	12.4	ORFNames=TRIUR3_24152 {ECO:0000313|EMBL:EMS57741.1};	M7ZDM4_TRIUA	Uncharacterized protein	SubName: Full=Uncharacterized protein {ECO:0000313|EMBL:EMS57741.1, ECO:0000313|EnsemblPlants:TRIUR3_24152-P1};
TRINITY_DN126_c0_g4_i1	tr|A0A1D5XG34|A0A1D5XG34_WHEAT	41	3.5e-11	77.8	15.2		A0A1D5XG34_WHEAT	Uncharacterized protein	SubName: Full=Uncharacterized protein {ECO:0000313|EnsemblPlants:TRIAE_CS42_4BL_TGACv1_320369_AA1037010.1};
TRINITY_DN126_c1_g1_i5	tr|M8C888|M8C888_AEGTA	31	1.7e-07	66.6	5.4	ORFNames=F775_27019 {ECO:0000313|EMBL:EMT11313.1};	M8C888_AEGTA	Protein transport protein Sec23A	SubName: Full=Protein transport protein Sec23A {ECO:0000313|EMBL:EMT11313.1, ECO:0000313|EnsemblPlants:EMT11313};
TRINITY_DN126_c1_g1_i11	tr|A0A1D6A6E5|A0A1D6A6E5_WHEAT	35	0.00061	53.5	15.1		A0A1D6A6E5_WHEAT	Uncharacterized protein	SubName: Full=Uncharacterized protein {ECO:0000313|EnsemblPlants:TRIAE_CS42_6AL_TGACv1_471227_AA1505120.1};
TRINITY_DN126_c1_g1_i14	tr|A0A1D6RVM9|A0A1D6RVM9_WHEAT	64	1.9e-26	129.8	9.8		A0A1D6RVM9_WHEAT	Uncharacterized protein	SubName: Full=Uncharacterized protein {ECO:0000313|EnsemblPlants:TRIAE_CS42_4AS_TGACv1_306421_AA1007900.5};
TRINITY_DN126_c1_g1_i2	tr|Q40057|Q40057_HORVU	105	8.7e-17	96.7	31.9	Name=hsp18 {ECO:0000313|EMBL:CAA45862.1};	Q40057_HORVU	18 Kd heat shock protein	SubName: Full=18 Kd heat shock protein {ECO:0000313|EMBL:CAA45862.1};
TRINITY_DN126_c1_g1_i9	tr|Q40057|Q40057_HORVU	105	4.2e-17	96.7	67	Name=hsp18 {ECO:0000313|EMBL:CAA45862.1};	Q40057_HORVU	18 Kd heat shock protein	SubName: Full=18 Kd heat shock protein {ECO:0000313|EMBL:CAA45862.1};
TRINITY_DN126_c1_g1_i10	tr|A0A1D5WW00|A0A1D5WW00_WHEAT	46	8.8e-15	89.4	22.7		A0A1D5WW00_WHEAT	Uncharacterized protein	SubName: Full=Uncharacterized protein {ECO:0000313|EnsemblPlants:TRIAE_CS42_3DS_TGACv1_273177_AA0929250.1};
TRINITY_DN126_c1_g1_i1	tr|A0A1D6RVM9|A0A1D6RVM9_WHEAT	64	1.4e-26	129.8	13.1		A0A1D6RVM9_WHEAT	Uncharacterized protein	SubName: Full=Uncharacterized protein {ECO:0000313|EnsemblPlants:TRIAE_CS42_4AS_TGACv1_306421_AA1007900.5};
TRINITY_DN126_c1_g1_i6	tr|Q40057|Q40057_HORVU	112	7.2e-22	113.6	33.2	Name=hsp18 {ECO:0000313|EMBL:CAA45862.1};	Q40057_HORVU	18 Kd heat shock protein	SubName: Full=18 Kd heat shock protein {ECO:0000313|EMBL:CAA45862.1};
TRINITY_DN126_c1_g1_i3	tr|A0A1D6RVM9|A0A1D6RVM9_WHEAT	64	1.7e-26	129.8	10.7		A0A1D6RVM9_WHEAT	Uncharacterized protein	SubName: Full=Uncharacterized protein {ECO:0000313|EnsemblPlants:TRIAE_CS42_4AS_TGACv1_306421_AA1007900.5};
TRINITY_DN145_c0_g1_i3	tr|A0A1D5URL1|A0A1D5URL1_WHEAT	462	6.5e-267	928.7	66		A0A1D5URL1_WHEAT	Uncharacterized protein	SubName: Full=Uncharacterized protein {ECO:0000313|EnsemblPlants:TRIAE_CS42_2DL_TGACv1_160486_AA0551050.2};
TRINITY_DN145_c0_g1_i2	tr|A0A1D5URL1|A0A1D5URL1_WHEAT	462	7e-267	928.3	80.6		A0A1D5URL1_WHEAT	Uncharacterized protein	SubName: Full=Uncharacterized protein {ECO:0000313|EnsemblPlants:TRIAE_CS42_2DL_TGACv1_160486_AA0551050.2};
TRINITY_DN145_c0_g1_i1	tr|A0A1D5URL1|A0A1D5URL1_WHEAT	462	2e-266	927.2	64.4		A0A1D5URL1_WHEAT	Uncharacterized protein	SubName: Full=Uncharacterized protein {ECO:0000313|EnsemblPlants:TRIAE_CS42_2DL_TGACv1_160486_AA0551050.2};
TRINITY_DN145_c0_g1_i4	tr|A0A1D5URL1|A0A1D5URL1_WHEAT	462	2e-266	927.5	48.6		A0A1D5URL1_WHEAT	Uncharacterized protein	SubName: Full=Uncharacterized protein {ECO:0000313|EnsemblPlants:TRIAE_CS42_2DL_TGACv1_160486_AA0551050.2};
TRINITY_DN145_c0_g2_i1	tr|A0A1D6BAQ2|A0A1D6BAQ2_WHEAT	435	3.6e-209	736.5	83.4		A0A1D6BAQ2_WHEAT	Uncharacterized protein	SubName: Full=Uncharacterized protein {ECO:0000313|EnsemblPlants:TRIAE_CS42_6DL_TGACv1_528776_AA1716190.1};
TRINITY_DN163_c0_g1_i2	tr|A0A0A8Y2P7|A0A0A8Y2P7_ARUDO	67	8.1e-29	134.4	98		A0A0A8Y2P7_ARUDO	Uncharacterized protein	SubName: Full=Uncharacterized protein {ECO:0000313|EMBL:JAD18037.1};
TRINITY_DN163_c0_g1_i1	tr|A7XA01|A7XA01_WHEAT	86	3e-39	169.5	93.8	Name=ERFL2a {ECO:0000313|EMBL:ABC65855.1};	A7XA01_WHEAT	Ethylene-responsive factor-like transcription factor ERFL2a	SubName: Full=Ethylene-responsive factor-like transcription factor ERFL2a {ECO:0000313|EMBL:ABC65855.1, ECO:0000313|EnsemblPlants:TRIAE_CS42_1BL_TGACv1_032766_AA0133950.1};
TRINITY_DN163_c0_g3_i2	tr|A0A1D5SUQ3|A0A1D5SUQ3_WHEAT	133	1.2e-57	231.9	58.9		A0A1D5SUQ3_WHEAT	Uncharacterized protein	SubName: Full=Uncharacterized protein {ECO:0000313|EnsemblPlants:TRIAE_CS42_1DL_TGACv1_062072_AA0208320.1};
TRINITY_DN163_c0_g3_i1	tr|A0A1D5RUW6|A0A1D5RUW6_WHEAT	113	1.8e-44	188	55.8		A0A1D5RUW6_WHEAT	Uncharacterized protein	SubName: Full=Uncharacterized protein {ECO:0000313|EnsemblPlants:TRIAE_CS42_1AL_TGACv1_001416_AA0030250.1};
TRINITY_DN163_c0_g3_i3	tr|A0A1D5SCS2|A0A1D5SCS2_WHEAT	134	2.9e-43	184.1	59.1		A0A1D5SCS2_WHEAT	Uncharacterized protein	SubName: Full=Uncharacterized protein {ECO:0000313|EnsemblPlants:TRIAE_CS42_1BL_TGACv1_031753_AA0120080.1};
TRINITY_DN163_c0_g4_i2	tr|A0A1D5TJN0|A0A1D5TJN0_WHEAT	95	1.2e-32	147.9	81.9		A0A1D5TJN0_WHEAT	Uncharacterized protein	SubName: Full=Uncharacterized protein {ECO:0000313|EnsemblPlants:TRIAE_CS42_2AS_TGACv1_112348_AA0336140.1};
TRINITY_DN163_c0_g4_i1	tr|A0A1D5TJN0|A0A1D5TJN0_WHEAT	95	6.4e-34	152.1	81		A0A1D5TJN0_WHEAT	Uncharacterized protein	SubName: Full=Uncharacterized protein {ECO:0000313|EnsemblPlants:TRIAE_CS42_2AS_TGACv1_112348_AA0336140.1};
TRINITY_DN147_c0_g1_i3	tr|A0A1D5S7R8|A0A1D5S7R8_WHEAT	258	5.8e-154	553.9	27.8		A0A1D5S7R8_WHEAT	Uncharacterized protein	SubName: Full=Uncharacterized protein {ECO:0000313|EnsemblPlants:TRIAE_CS42_1BL_TGACv1_030593_AA0095050.1};
TRINITY_DN147_c0_g1_i1	tr|A0A1D5S7R8|A0A1D5S7R8_WHEAT	258	5e-154	553.9	32		A0A1D5S7R8_WHEAT	Uncharacterized protein	SubName: Full=Uncharacterized protein {ECO:0000313|EnsemblPlants:TRIAE_CS42_1BL_TGACv1_030593_AA0095050.1};
TRINITY_DN147_c0_g1_i11	tr|A0A1D5S7R8|A0A1D5S7R8_WHEAT	257	7.6e-154	553.1	36.2		A0A1D5S7R8_WHEAT	Uncharacterized protein	SubName: Full=Uncharacterized protein {ECO:0000313|EnsemblPlants:TRIAE_CS42_1BL_TGACv1_030593_AA0095050.1};
TRINITY_DN147_c0_g1_i5	tr|A0A1D5S7R8|A0A1D5S7R8_WHEAT	258	5.1e-154	553.9	31.4		A0A1D5S7R8_WHEAT	Uncharacterized protein	SubName: Full=Uncharacterized protein {ECO:0000313|EnsemblPlants:TRIAE_CS42_1BL_TGACv1_030593_AA0095050.1};
TRINITY_DN147_c0_g1_i2	tr|A0A1D5S7R8|A0A1D5S7R8_WHEAT	257	8.2e-154	553.1	33.4		A0A1D5S7R8_WHEAT	Uncharacterized protein	SubName: Full=Uncharacterized protein {ECO:0000313|EnsemblPlants:TRIAE_CS42_1BL_TGACv1_030593_AA0095050.1};
TRINITY_DN147_c0_g1_i8	tr|A0A1D5S7R8|A0A1D5S7R8_WHEAT	258	4.2e-154	553.9	38.6		A0A1D5S7R8_WHEAT	Uncharacterized protein	SubName: Full=Uncharacterized protein {ECO:0000313|EnsemblPlants:TRIAE_CS42_1BL_TGACv1_030593_AA0095050.1};
TRINITY_DN147_c0_g1_i9	tr|A0A1D5S7R8|A0A1D5S7R8_WHEAT	257	6.1e-154	553.1	44.8		A0A1D5S7R8_WHEAT	Uncharacterized protein	SubName: Full=Uncharacterized protein {ECO:0000313|EnsemblPlants:TRIAE_CS42_1BL_TGACv1_030593_AA0095050.1};
TRINITY_DN147_c0_g1_i4	tr|A0A1D5S7R8|A0A1D5S7R8_WHEAT	257	8.9e-154	553.1	30.8		A0A1D5S7R8_WHEAT	Uncharacterized protein	SubName: Full=Uncharacterized protein {ECO:0000313|EnsemblPlants:TRIAE_CS42_1BL_TGACv1_030593_AA0095050.1};
TRINITY_DN147_c0_g1_i6	tr|A0A1D5S7R8|A0A1D5S7R8_WHEAT	257	8.4e-154	553.1	32.8		A0A1D5S7R8_WHEAT	Uncharacterized protein	SubName: Full=Uncharacterized protein {ECO:0000313|EnsemblPlants:TRIAE_CS42_1BL_TGACv1_030593_AA0095050.1};
TRINITY_DN147_c0_g1_i7	tr|A0A1D5S7R8|A0A1D5S7R8_WHEAT	258	5.4e-154	553.9	29.9		A0A1D5S7R8_WHEAT	Uncharacterized protein	SubName: Full=Uncharacterized protein {ECO:0000313|EnsemblPlants:TRIAE_CS42_1BL_TGACv1_030593_AA0095050.1};
TRINITY_DN147_c0_g1_i10	tr|A0A1D5S7R8|A0A1D5S7R8_WHEAT	258	5.5e-154	553.9	29.3		A0A1D5S7R8_WHEAT	Uncharacterized protein	SubName: Full=Uncharacterized protein {ECO:0000313|EnsemblPlants:TRIAE_CS42_1BL_TGACv1_030593_AA0095050.1};
TRINITY_DN112_c0_g1_i6	tr|A0A1D5SBB1|A0A1D5SBB1_WHEAT	514	2.4e-289	1003.8	48.6		A0A1D5SBB1_WHEAT	Sulfhydryl oxidase	RecName: Full=Sulfhydryl oxidase {ECO:0000256|RuleBase:RU371123}; EC=1.8.3.2 {ECO:0000256|RuleBase:RU371123};
TRINITY_DN112_c0_g1_i2	tr|A0A1D5SBB1|A0A1D5SBB1_WHEAT	514	3e-290	1006.1	79		A0A1D5SBB1_WHEAT	Sulfhydryl oxidase	RecName: Full=Sulfhydryl oxidase {ECO:0000256|RuleBase:RU371123}; EC=1.8.3.2 {ECO:0000256|RuleBase:RU371123};
TRINITY_DN112_c0_g1_i3	tr|A0A1D5SBB1|A0A1D5SBB1_WHEAT	514	1.6e-289	1003.8	75.6		A0A1D5SBB1_WHEAT	Sulfhydryl oxidase	RecName: Full=Sulfhydryl oxidase {ECO:0000256|RuleBase:RU371123}; EC=1.8.3.2 {ECO:0000256|RuleBase:RU371123};
TRINITY_DN112_c0_g1_i8	tr|A0A1D5SBB2|A0A1D5SBB2_WHEAT	509	4.4e-287	995.3	93.6		A0A1D5SBB2_WHEAT	Sulfhydryl oxidase	RecName: Full=Sulfhydryl oxidase {ECO:0000256|RuleBase:RU371123}; EC=1.8.3.2 {ECO:0000256|RuleBase:RU371123};
TRINITY_DN112_c0_g1_i1	tr|A0A1D5SBB2|A0A1D5SBB2_WHEAT	509	2.1e-288	1000	80.4		A0A1D5SBB2_WHEAT	Sulfhydryl oxidase	RecName: Full=Sulfhydryl oxidase {ECO:0000256|RuleBase:RU371123}; EC=1.8.3.2 {ECO:0000256|RuleBase:RU371123};
TRINITY_DN112_c0_g1_i9	tr|A0A1D5SBB1|A0A1D5SBB1_WHEAT	514	2.5e-289	1003.8	47.5		A0A1D5SBB1_WHEAT	Sulfhydryl oxidase	RecName: Full=Sulfhydryl oxidase {ECO:0000256|RuleBase:RU371123}; EC=1.8.3.2 {ECO:0000256|RuleBase:RU371123};
TRINITY_DN112_c0_g1_i5	tr|A0A1D5SBB1|A0A1D5SBB1_WHEAT	514	2.4e-290	1006.5	76.5		A0A1D5SBB1_WHEAT	Sulfhydryl oxidase	RecName: Full=Sulfhydryl oxidase {ECO:0000256|RuleBase:RU371123}; EC=1.8.3.2 {ECO:0000256|RuleBase:RU371123};
TRINITY_DN112_c0_g2_i1	tr|A0A1D5SBB1|A0A1D5SBB1_WHEAT	66	1.4e-15	92.4	24.5		A0A1D5SBB1_WHEAT	Sulfhydryl oxidase	RecName: Full=Sulfhydryl oxidase {ECO:0000256|RuleBase:RU371123}; EC=1.8.3.2 {ECO:0000256|RuleBase:RU371123};
TRINITY_DN120_c0_g1_i3	tr|M7ZNG9|M7ZNG9_TRIUA	444	1.1e-250	874.8	65.9	ORFNames=TRIUR3_19023 {ECO:0000313|EMBL:EMS49604.1};	M7ZNG9_TRIUA	Glyceraldehyde-3-phosphate dehydrogenase	RecName: Full=Glyceraldehyde-3-phosphate dehydrogenase {ECO:0000256|RuleBase:RU361160}; EC=1.2.1.- {ECO:0000256|RuleBase:RU361160};
TRINITY_DN120_c0_g1_i6	tr|A0A1D5T798|A0A1D5T798_WHEAT	365	3.8e-205	723.4	56.6		A0A1D5T798_WHEAT	Glyceraldehyde-3-phosphate dehydrogenase	RecName: Full=Glyceraldehyde-3-phosphate dehydrogenase {ECO:0000256|RuleBase:RU361160}; EC=1.2.1.- {ECO:0000256|RuleBase:RU361160};
TRINITY_DN120_c0_g1_i2	tr|A0A1D5XY50|A0A1D5XY50_WHEAT	444	2.2e-250	873.6	72.2		A0A1D5XY50_WHEAT	Glyceraldehyde-3-phosphate dehydrogenase	RecName: Full=Glyceraldehyde-3-phosphate dehydrogenase {ECO:0000256|RuleBase:RU361160}; EC=1.2.1.- {ECO:0000256|RuleBase:RU361160};
TRINITY_DN120_c0_g1_i8	tr|A0A1D5XY50|A0A1D5XY50_WHEAT	444	1.4e-250	874.4	65.9		A0A1D5XY50_WHEAT	Glyceraldehyde-3-phosphate dehydrogenase	RecName: Full=Glyceraldehyde-3-phosphate dehydrogenase {ECO:0000256|RuleBase:RU361160}; EC=1.2.1.- {ECO:0000256|RuleBase:RU361160};
TRINITY_DN120_c0_g1_i7	tr|F2D714|F2D714_HORVV	401	5.5e-225	789.3	65.1		F2D714_HORVV	Glyceraldehyde-3-phosphate dehydrogenase	RecName: Full=Glyceraldehyde-3-phosphate dehydrogenase {ECO:0000256|RuleBase:RU361160}; EC=1.2.1.- {ECO:0000256|RuleBase:RU361160};
TRINITY_DN120_c0_g1_i9	tr|F2D714|F2D714_HORVV	400	8.9e-221	775	78.1		F2D714_HORVV	Glyceraldehyde-3-phosphate dehydrogenase	RecName: Full=Glyceraldehyde-3-phosphate dehydrogenase {ECO:0000256|RuleBase:RU361160}; EC=1.2.1.- {ECO:0000256|RuleBase:RU361160};
TRINITY_DN120_c0_g1_i10	tr|M7ZNG9|M7ZNG9_TRIUA	444	1.8e-250	874	66.6	ORFNames=TRIUR3_19023 {ECO:0000313|EMBL:EMS49604.1};	M7ZNG9_TRIUA	Glyceraldehyde-3-phosphate dehydrogenase	RecName: Full=Glyceraldehyde-3-phosphate dehydrogenase {ECO:0000256|RuleBase:RU361160}; EC=1.2.1.- {ECO:0000256|RuleBase:RU361160};
TRINITY_DN120_c0_g1_i1	tr|M7ZNG9|M7ZNG9_TRIUA	444	1.1e-250	874.8	66	ORFNames=TRIUR3_19023 {ECO:0000313|EMBL:EMS49604.1};	M7ZNG9_TRIUA	Glyceraldehyde-3-phosphate dehydrogenase	RecName: Full=Glyceraldehyde-3-phosphate dehydrogenase {ECO:0000256|RuleBase:RU361160}; EC=1.2.1.- {ECO:0000256|RuleBase:RU361160};
TRINITY_DN192_c0_g1_i7	tr|M8CA60|M8CA60_AEGTA	81	4.6e-42	179.1	73.6	ORFNames=F775_31839 {ECO:0000313|EMBL:EMT23952.1};	M8CA60_AEGTA	Chlorophyll a-b binding protein, chloroplastic	RecName: Full=Chlorophyll a-b binding protein, chloroplastic {ECO:0000256|RuleBase:RU363080};
TRINITY_DN192_c0_g1_i12	tr|M0ZEV7|M0ZEV7_HORVV	152	1.6e-80	307.4	98.3		M0ZEV7_HORVV	Chlorophyll a-b binding protein, chloroplastic	RecName: Full=Chlorophyll a-b binding protein, chloroplastic {ECO:0000256|RuleBase:RU363080};
TRINITY_DN192_c0_g1_i9	tr|M0ZEV7|M0ZEV7_HORVV	167	1e-88	334.7	98.2		M0ZEV7_HORVV	Chlorophyll a-b binding protein, chloroplastic	RecName: Full=Chlorophyll a-b binding protein, chloroplastic {ECO:0000256|RuleBase:RU363080};
TRINITY_DN192_c0_g1_i13	tr|M8CA60|M8CA60_AEGTA	81	4.6e-42	179.1	73.6	ORFNames=F775_31839 {ECO:0000313|EMBL:EMT23952.1};	M8CA60_AEGTA	Chlorophyll a-b binding protein, chloroplastic	RecName: Full=Chlorophyll a-b binding protein, chloroplastic {ECO:0000256|RuleBase:RU363080};
TRINITY_DN192_c0_g1_i1	tr|I1IIE9|I1IIE9_BRADI	177	4.4e-63	249.6	99.1	Name=LOC100841670 {ECO:0000313|EnsemblPlants:BRADI4G07380.1};	I1IIE9_BRADI	Chlorophyll a-b binding protein, chloroplastic	RecName: Full=Chlorophyll a-b binding protein, chloroplastic {ECO:0000256|RuleBase:RU363080};
TRINITY_DN192_c0_g1_i16	tr|I1IIE9|I1IIE9_BRADI	205	7.1e-81	308.9	99.3	Name=LOC100841670 {ECO:0000313|EnsemblPlants:BRADI4G07380.1};	I1IIE9_BRADI	Chlorophyll a-b binding protein, chloroplastic	RecName: Full=Chlorophyll a-b binding protein, chloroplastic {ECO:0000256|RuleBase:RU363080};
TRINITY_DN192_c0_g1_i4	sp|P06671|CB22_MAIZE	90	7.9e-48	198	99.6		CB22_MAIZE	Chlorophyll a-b binding protein, chloroplastic; LHCII type I CAB; LHCP	RecName: Full=Chlorophyll a-b binding protein, chloroplastic; AltName: Full=LHCII type I CAB; Short=LHCP; Flags: Precursor;
TRINITY_DN192_c0_g1_i11	tr|A0A1D6DEW4|A0A1D6DEW4_WHEAT	115	3.2e-62	246.1	98.9		A0A1D6DEW4_WHEAT	Chlorophyll a-b binding protein, chloroplastic	RecName: Full=Chlorophyll a-b binding protein, chloroplastic {ECO:0000256|RuleBase:RU363080};
TRINITY_DN192_c0_g1_i3	tr|M0ZEV7|M0ZEV7_HORVV	156	2.6e-71	276.9	88		M0ZEV7_HORVV	Chlorophyll a-b binding protein, chloroplastic	RecName: Full=Chlorophyll a-b binding protein, chloroplastic {ECO:0000256|RuleBase:RU363080};
TRINITY_DN192_c0_g1_i15	tr|M0ZEV7|M0ZEV7_HORVV	201	4.3e-100	372.9	92.8		M0ZEV7_HORVV	Chlorophyll a-b binding protein, chloroplastic	RecName: Full=Chlorophyll a-b binding protein, chloroplastic {ECO:0000256|RuleBase:RU363080};
TRINITY_DN192_c0_g1_i8	tr|M8CA60|M8CA60_AEGTA	96	2.1e-51	210.3	76.6	ORFNames=F775_31839 {ECO:0000313|EMBL:EMT23952.1};	M8CA60_AEGTA	Chlorophyll a-b binding protein, chloroplastic	RecName: Full=Chlorophyll a-b binding protein, chloroplastic {ECO:0000256|RuleBase:RU363080};
TRINITY_DN192_c0_g1_i5	tr|M0ZEV7|M0ZEV7_HORVV	124	7.2e-63	248.4	97.6		M0ZEV7_HORVV	Chlorophyll a-b binding protein, chloroplastic	RecName: Full=Chlorophyll a-b binding protein, chloroplastic {ECO:0000256|RuleBase:RU363080};
TRINITY_DN192_c0_g1_i6	tr|I1HGC1|I1HGC1_BRADI	105	2.8e-57	229.6	99.4	Name=LOC100841831 {ECO:0000313|EnsemblPlants:BRADI2G16290.1}; ORFNames=BRADI_2g16290 {ECO:0000313|EMBL:KQK04838.1};	I1HGC1_BRADI	Chlorophyll a-b binding protein, chloroplastic	RecName: Full=Chlorophyll a-b binding protein, chloroplastic {ECO:0000256|RuleBase:RU363080};
TRINITY_DN192_c1_g1_i2	tr|W5HU96|W5HU96_WHEAT	81	1.5e-37	163.7	99.2		W5HU96_WHEAT	Chlorophyll a-b binding protein, chloroplastic	RecName: Full=Chlorophyll a-b binding protein, chloroplastic {ECO:0000256|RuleBase:RU363080};
TRINITY_DN192_c1_g1_i1	tr|W5HU96|W5HU96_WHEAT	82	2.3e-38	166.4	99.6		W5HU96_WHEAT	Chlorophyll a-b binding protein, chloroplastic	RecName: Full=Chlorophyll a-b binding protein, chloroplastic {ECO:0000256|RuleBase:RU363080};
TRINITY_DN192_c1_g2_i1	tr|A0A287V730|A0A287V730_HORVV	79	1.2e-19	104.4	89.4		A0A287V730_HORVV	Chlorophyll a-b binding protein, chloroplastic	RecName: Full=Chlorophyll a-b binding protein, chloroplastic {ECO:0000256|RuleBase:RU363080};
TRINITY_DN192_c5_g1_i1	sp|P0CJ48|CB1A_ARATH	85	3.9e-44	185.7	98.8	Name=LHCB1.1; Synonyms=AB165, CAB2, LHCP-B; OrderedLocusNames=At1g29920; ORFNames=F1N18.4;	CB1A_ARATH	Chlorophyll a-b binding protein 2, chloroplastic; Chlorophyll a-b protein 165; CAB-165; LHCII type I CAB-2	RecName: Full=Chlorophyll a-b binding protein 2, chloroplastic; AltName: Full=Chlorophyll a-b protein 165; Short=CAB-165; AltName: Full=LHCII type I CAB-2; Flags: Precursor;
TRINITY_DN192_c5_g2_i1	sp|P0CJ48|CB1A_ARATH	181	1.5e-101	377.5	98	Name=LHCB1.1; Synonyms=AB165, CAB2, LHCP-B; OrderedLocusNames=At1g29920; ORFNames=F1N18.4;	CB1A_ARATH	Chlorophyll a-b binding protein 2, chloroplastic; Chlorophyll a-b protein 165; CAB-165; LHCII type I CAB-2	RecName: Full=Chlorophyll a-b binding protein 2, chloroplastic; AltName: Full=Chlorophyll a-b protein 165; Short=CAB-165; AltName: Full=LHCII type I CAB-2; Flags: Precursor;
TRINITY_DN192_c5_g2_i2	sp|P0CJ48|CB1A_ARATH	181	1.5e-101	377.5	98	Name=LHCB1.1; Synonyms=AB165, CAB2, LHCP-B; OrderedLocusNames=At1g29920; ORFNames=F1N18.4;	CB1A_ARATH	Chlorophyll a-b binding protein 2, chloroplastic; Chlorophyll a-b protein 165; CAB-165; LHCII type I CAB-2	RecName: Full=Chlorophyll a-b binding protein 2, chloroplastic; AltName: Full=Chlorophyll a-b protein 165; Short=CAB-165; AltName: Full=LHCII type I CAB-2; Flags: Precursor;
TRINITY_DN170_c0_g1_i2	tr|A0A1D6C0C9|A0A1D6C0C9_WHEAT	424	2.8e-188	666.8	97.4		A0A1D6C0C9_WHEAT	Uncharacterized protein	SubName: Full=Uncharacterized protein {ECO:0000313|EnsemblPlants:TRIAE_CS42_7AS_TGACv1_571265_AA1846380.1};
TRINITY_DN170_c0_g1_i4	tr|W5DNH0|W5DNH0_WHEAT	394	1.2e-191	677.9	96		W5DNH0_WHEAT	Uncharacterized protein	SubName: Full=Uncharacterized protein {ECO:0000313|EnsemblPlants:TRIAE_CS42_4AL_TGACv1_289135_AA0965570.1};
TRINITY_DN170_c0_g1_i5	tr|A0A1D6C0C9|A0A1D6C0C9_WHEAT	401	2.8e-192	680.2	80.8		A0A1D6C0C9_WHEAT	Uncharacterized protein	SubName: Full=Uncharacterized protein {ECO:0000313|EnsemblPlants:TRIAE_CS42_7AS_TGACv1_571265_AA1846380.1};
TRINITY_DN170_c0_g1_i1	tr|W5DNH0|W5DNH0_WHEAT	394	1.2e-191	678.3	68.6		W5DNH0_WHEAT	Uncharacterized protein	SubName: Full=Uncharacterized protein {ECO:0000313|EnsemblPlants:TRIAE_CS42_4AL_TGACv1_289135_AA0965570.1};
TRINITY_DN170_c0_g1_i6	tr|W5DNH0|W5DNH0_WHEAT	394	1.3e-191	678.3	67.1		W5DNH0_WHEAT	Uncharacterized protein	SubName: Full=Uncharacterized protein {ECO:0000313|EnsemblPlants:TRIAE_CS42_4AL_TGACv1_289135_AA0965570.1};
TRINITY_DN170_c0_g1_i3	tr|W5DNH0|W5DNH0_WHEAT	394	3.2e-192	680.2	70		W5DNH0_WHEAT	Uncharacterized protein	SubName: Full=Uncharacterized protein {ECO:0000313|EnsemblPlants:TRIAE_CS42_4AL_TGACv1_289135_AA0965570.1};
TRINITY_DN175_c0_g1_i2	tr|A0A1D5SVH1|A0A1D5SVH1_WHEAT	519	2.5e-267	930.2	65.1		A0A1D5SVH1_WHEAT	Uncharacterized protein	SubName: Full=Uncharacterized protein {ECO:0000313|EnsemblPlants:TRIAE_CS42_1DL_TGACv1_062314_AA0212400.1};
TRINITY_DN175_c0_g1_i5	tr|A0A1D5SVH1|A0A1D5SVH1_WHEAT	519	1.3e-286	994.2	69.8		A0A1D5SVH1_WHEAT	Uncharacterized protein	SubName: Full=Uncharacterized protein {ECO:0000313|EnsemblPlants:TRIAE_CS42_1DL_TGACv1_062314_AA0212400.1};
TRINITY_DN175_c0_g1_i1	tr|A0A1D5WK74|A0A1D5WK74_WHEAT	474	4.3e-261	909.4	64.4		A0A1D5WK74_WHEAT	Uncharacterized protein	SubName: Full=Uncharacterized protein {ECO:0000313|EnsemblPlants:TRIAE_CS42_3DL_TGACv1_250937_AA0875220.1};
TRINITY_DN175_c0_g1_i4	tr|A0A1D5WK74|A0A1D5WK74_WHEAT	474	3.5e-261	909.4	79		A0A1D5WK74_WHEAT	Uncharacterized protein	SubName: Full=Uncharacterized protein {ECO:0000313|EnsemblPlants:TRIAE_CS42_3DL_TGACv1_250937_AA0875220.1};
TRINITY_DN175_c0_g1_i7	tr|A0A1D5SVH1|A0A1D5SVH1_WHEAT	519	2.2e-267	930.2	75.3		A0A1D5SVH1_WHEAT	Uncharacterized protein	SubName: Full=Uncharacterized protein {ECO:0000313|EnsemblPlants:TRIAE_CS42_1DL_TGACv1_062314_AA0212400.1};
TRINITY_DN137_c0_g1_i5	tr|M7YQE0|M7YQE0_TRIUA	288	5e-100	373.6	67.1	ORFNames=TRIUR3_19115 {ECO:0000313|EMBL:EMS49226.1};	M7YQE0_TRIUA	Inosine triphosphate pyrophosphatase; ITPase; Inosine triphosphatase; Non-canonical purine NTP pyrophosphatase; Non-standard purine NTP pyrophosphatase; Nucleoside-triphosphate diphosphatase; Nucleoside-triphosphate pyrophosphatase; NTPase	RecName: Full=Inosine triphosphate pyrophosphatase {ECO:0000256|HAMAP-Rule:MF_03148}; Short=ITPase {ECO:0000256|HAMAP-Rule:MF_03148}; Short=Inosine triphosphatase {ECO:0000256|HAMAP-Rule:MF_03148}; EC=3.6.1.9 {ECO:0000256|HAMAP-Rule:MF_03148}; AltName: Full=Non-canonical purine NTP pyrophosphatase {ECO:0000256|HAMAP-Rule:MF_03148}; AltName: Full=Non-standard purine NTP pyrophosphatase {ECO:000025…
TRINITY_DN137_c0_g1_i7	tr|M7YQE0|M7YQE0_TRIUA	220	5.4e-42	179.9	99.8	ORFNames=TRIUR3_19115 {ECO:0000313|EMBL:EMS49226.1};	M7YQE0_TRIUA	Inosine triphosphate pyrophosphatase; ITPase; Inosine triphosphatase; Non-canonical purine NTP pyrophosphatase; Non-standard purine NTP pyrophosphatase; Nucleoside-triphosphate diphosphatase; Nucleoside-triphosphate pyrophosphatase; NTPase	RecName: Full=Inosine triphosphate pyrophosphatase {ECO:0000256|HAMAP-Rule:MF_03148}; Short=ITPase {ECO:0000256|HAMAP-Rule:MF_03148}; Short=Inosine triphosphatase {ECO:0000256|HAMAP-Rule:MF_03148}; EC=3.6.1.9 {ECO:0000256|HAMAP-Rule:MF_03148}; AltName: Full=Non-canonical purine NTP pyrophosphatase {ECO:0000256|HAMAP-Rule:MF_03148}; AltName: Full=Non-standard purine NTP pyrophosphatase {ECO:000025…
TRINITY_DN137_c0_g1_i8	tr|M7YQE0|M7YQE0_TRIUA	66	1.1e-26	129	29.4	ORFNames=TRIUR3_19115 {ECO:0000313|EMBL:EMS49226.1};	M7YQE0_TRIUA	Inosine triphosphate pyrophosphatase; ITPase; Inosine triphosphatase; Non-canonical purine NTP pyrophosphatase; Non-standard purine NTP pyrophosphatase; Nucleoside-triphosphate diphosphatase; Nucleoside-triphosphate pyrophosphatase; NTPase	RecName: Full=Inosine triphosphate pyrophosphatase {ECO:0000256|HAMAP-Rule:MF_03148}; Short=ITPase {ECO:0000256|HAMAP-Rule:MF_03148}; Short=Inosine triphosphatase {ECO:0000256|HAMAP-Rule:MF_03148}; EC=3.6.1.9 {ECO:0000256|HAMAP-Rule:MF_03148}; AltName: Full=Non-canonical purine NTP pyrophosphatase {ECO:0000256|HAMAP-Rule:MF_03148}; AltName: Full=Non-standard purine NTP pyrophosphatase {ECO:000025…
TRINITY_DN137_c0_g1_i9	tr|A0A1D6RG07|A0A1D6RG07_WHEAT	115	1.5e-59	239.2	26.7		A0A1D6RG07_WHEAT	Inosine triphosphate pyrophosphatase; ITPase; Inosine triphosphatase; Non-canonical purine NTP pyrophosphatase; Non-standard purine NTP pyrophosphatase; Nucleoside-triphosphate diphosphatase; Nucleoside-triphosphate pyrophosphatase; NTPase	RecName: Full=Inosine triphosphate pyrophosphatase {ECO:0000256|HAMAP-Rule:MF_03148}; Short=ITPase {ECO:0000256|HAMAP-Rule:MF_03148}; Short=Inosine triphosphatase {ECO:0000256|HAMAP-Rule:MF_03148}; EC=3.6.1.9 {ECO:0000256|HAMAP-Rule:MF_03148}; AltName: Full=Non-canonical purine NTP pyrophosphatase {ECO:0000256|HAMAP-Rule:MF_03148}; AltName: Full=Non-standard purine NTP pyrophosphatase {ECO:000025…
TRINITY_DN137_c0_g1_i6	tr|A0A287F6J0|A0A287F6J0_HORVV	113	1.7e-42	181.8	41.7		A0A287F6J0_HORVV	Uncharacterized protein	SubName: Full=Uncharacterized protein {ECO:0000313|EnsemblPlants:HORVU1Hr1G038270.6};
TRINITY_DN137_c0_g1_i1	tr|A0A1D6RG07|A0A1D6RG07_WHEAT	272	7.2e-36	159.8	99.9		A0A1D6RG07_WHEAT	Inosine triphosphate pyrophosphatase; ITPase; Inosine triphosphatase; Non-canonical purine NTP pyrophosphatase; Non-standard purine NTP pyrophosphatase; Nucleoside-triphosphate diphosphatase; Nucleoside-triphosphate pyrophosphatase; NTPase	RecName: Full=Inosine triphosphate pyrophosphatase {ECO:0000256|HAMAP-Rule:MF_03148}; Short=ITPase {ECO:0000256|HAMAP-Rule:MF_03148}; Short=Inosine triphosphatase {ECO:0000256|HAMAP-Rule:MF_03148}; EC=3.6.1.9 {ECO:0000256|HAMAP-Rule:MF_03148}; AltName: Full=Non-canonical purine NTP pyrophosphatase {ECO:0000256|HAMAP-Rule:MF_03148}; AltName: Full=Non-standard purine NTP pyrophosphatase {ECO:000025…
TRINITY_DN137_c0_g1_i2	tr|A0A287F6F5|A0A287F6F5_HORVV	193	2.3e-93	350.5	87.8		A0A287F6F5_HORVV	Inosine triphosphate pyrophosphatase; ITPase; Inosine triphosphatase; Non-canonical purine NTP pyrophosphatase; Non-standard purine NTP pyrophosphatase; Nucleoside-triphosphate diphosphatase; Nucleoside-triphosphate pyrophosphatase; NTPase	RecName: Full=Inosine triphosphate pyrophosphatase {ECO:0000256|HAMAP-Rule:MF_03148}; Short=ITPase {ECO:0000256|HAMAP-Rule:MF_03148}; Short=Inosine triphosphatase {ECO:0000256|HAMAP-Rule:MF_03148}; EC=3.6.1.9 {ECO:0000256|HAMAP-Rule:MF_03148}; AltName: Full=Non-canonical purine NTP pyrophosphatase {ECO:0000256|HAMAP-Rule:MF_03148}; AltName: Full=Non-standard purine NTP pyrophosphatase {ECO:000025…
TRINITY_DN137_c0_g1_i10	tr|A0A1D6RG07|A0A1D6RG07_WHEAT	205	6e-112	412.9	59.1		A0A1D6RG07_WHEAT	Inosine triphosphate pyrophosphatase; ITPase; Inosine triphosphatase; Non-canonical purine NTP pyrophosphatase; Non-standard purine NTP pyrophosphatase; Nucleoside-triphosphate diphosphatase; Nucleoside-triphosphate pyrophosphatase; NTPase	RecName: Full=Inosine triphosphate pyrophosphatase {ECO:0000256|HAMAP-Rule:MF_03148}; Short=ITPase {ECO:0000256|HAMAP-Rule:MF_03148}; Short=Inosine triphosphatase {ECO:0000256|HAMAP-Rule:MF_03148}; EC=3.6.1.9 {ECO:0000256|HAMAP-Rule:MF_03148}; AltName: Full=Non-canonical purine NTP pyrophosphatase {ECO:0000256|HAMAP-Rule:MF_03148}; AltName: Full=Non-standard purine NTP pyrophosphatase {ECO:000025…
TRINITY_DN137_c0_g1_i4	tr|A0A287F6J0|A0A287F6J0_HORVV	113	2.5e-42	181.4	37.2		A0A287F6J0_HORVV	Uncharacterized protein	SubName: Full=Uncharacterized protein {ECO:0000313|EnsemblPlants:HORVU1Hr1G038270.6};
TRINITY_DN137_c0_g1_i3	tr|M7YQE0|M7YQE0_TRIUA	210	7.9e-112	412.5	59.8	ORFNames=TRIUR3_19115 {ECO:0000313|EMBL:EMS49226.1};	M7YQE0_TRIUA	Inosine triphosphate pyrophosphatase; ITPase; Inosine triphosphatase; Non-canonical purine NTP pyrophosphatase; Non-standard purine NTP pyrophosphatase; Nucleoside-triphosphate diphosphatase; Nucleoside-triphosphate pyrophosphatase; NTPase	RecName: Full=Inosine triphosphate pyrophosphatase {ECO:0000256|HAMAP-Rule:MF_03148}; Short=ITPase {ECO:0000256|HAMAP-Rule:MF_03148}; Short=Inosine triphosphatase {ECO:0000256|HAMAP-Rule:MF_03148}; EC=3.6.1.9 {ECO:0000256|HAMAP-Rule:MF_03148}; AltName: Full=Non-canonical purine NTP pyrophosphatase {ECO:0000256|HAMAP-Rule:MF_03148}; AltName: Full=Non-standard purine NTP pyrophosphatase {ECO:000025…
TRINITY_DN160_c0_g1_i8	tr|A0A287PBG5|A0A287PBG5_HORVV	194	1.1e-91	345.5	57.2		A0A287PBG5_HORVV	HVA22-like protein	RecName: Full=HVA22-like protein {ECO:0000256|RuleBase:RU362006};
TRINITY_DN160_c0_g1_i5	tr|A0A287PBG5|A0A287PBG5_HORVV	157	1.2e-82	316.2	29.2		A0A287PBG5_HORVV	HVA22-like protein	RecName: Full=HVA22-like protein {ECO:0000256|RuleBase:RU362006};
TRINITY_DN160_c0_g1_i3	tr|A0A287PBF9|A0A287PBF9_HORVV	258	9.4e-89	336.3	49.2		A0A287PBF9_HORVV	Uncharacterized protein	SubName: Full=Uncharacterized protein {ECO:0000313|EnsemblPlants:HORVU4Hr1G062930.3};
TRINITY_DN160_c0_g1_i1	tr|A0A287PBF9|A0A287PBF9_HORVV	264	4e-97	364.4	44.3		A0A287PBF9_HORVV	Uncharacterized protein	SubName: Full=Uncharacterized protein {ECO:0000313|EnsemblPlants:HORVU4Hr1G062930.3};
TRINITY_DN160_c0_g1_i9	tr|A0A287PBF9|A0A287PBF9_HORVV	264	4e-97	364.4	44.3		A0A287PBF9_HORVV	Uncharacterized protein	SubName: Full=Uncharacterized protein {ECO:0000313|EnsemblPlants:HORVU4Hr1G062930.3};
TRINITY_DN160_c0_g1_i10	tr|A0A287PBF9|A0A287PBF9_HORVV	264	3.8e-97	364.4	46.7		A0A287PBF9_HORVV	Uncharacterized protein	SubName: Full=Uncharacterized protein {ECO:0000313|EnsemblPlants:HORVU4Hr1G062930.3};
TRINITY_DN160_c0_g1_i4	tr|A0A287PBF9|A0A287PBF9_HORVV	260	1.2e-82	316.2	42		A0A287PBF9_HORVV	Uncharacterized protein	SubName: Full=Uncharacterized protein {ECO:0000313|EnsemblPlants:HORVU4Hr1G062930.3};
TRINITY_DN160_c0_g1_i2	tr|A0A287PBF9|A0A287PBF9_HORVV	264	5.2e-97	364	44.6		A0A287PBF9_HORVV	Uncharacterized protein	SubName: Full=Uncharacterized protein {ECO:0000313|EnsemblPlants:HORVU4Hr1G062930.3};
TRINITY_DN160_c0_g1_i7	tr|A0A096UQM1|A0A096UQM1_WHEAT	34	2.4e-07	63.2	47.7		A0A096UQM1_WHEAT	HVA22-like protein	RecName: Full=HVA22-like protein {ECO:0000256|RuleBase:RU362006};
TRINITY_DN160_c0_g1_i6	tr|A0A287PBF9|A0A287PBF9_HORVV	260	1.2e-82	316.2	42		A0A287PBF9_HORVV	Uncharacterized protein	SubName: Full=Uncharacterized protein {ECO:0000313|EnsemblPlants:HORVU4Hr1G062930.3};
TRINITY_DN160_c1_g1_i4	tr|A0A096UU17|A0A096UU17_WHEAT	288	3.6e-105	390.6	73.2		A0A096UU17_WHEAT	HVA22-like protein	RecName: Full=HVA22-like protein {ECO:0000256|RuleBase:RU362006};
TRINITY_DN160_c1_g1_i1	tr|A0A096UU17|A0A096UU17_WHEAT	288	3.6e-105	391	56.7		A0A096UU17_WHEAT	HVA22-like protein	RecName: Full=HVA22-like protein {ECO:0000256|RuleBase:RU362006};
TRINITY_DN160_c1_g1_i2	tr|A0A096UU17|A0A096UU17_WHEAT	288	3.6e-105	391	56.6		A0A096UU17_WHEAT	HVA22-like protein	RecName: Full=HVA22-like protein {ECO:0000256|RuleBase:RU362006};
TRINITY_DN102_c0_g1_i1	tr|A0A1D5SMF6|A0A1D5SMF6_WHEAT	334	3.2e-161	577	71.8		A0A1D5SMF6_WHEAT	Uncharacterized protein	SubName: Full=Uncharacterized protein {ECO:0000313|EnsemblPlants:TRIAE_CS42_1BS_TGACv1_050399_AA0171650.1};
TRINITY_DN102_c0_g1_i8	tr|A0A1D5SMF6|A0A1D5SMF6_WHEAT	333	2.2e-170	607.1	94		A0A1D5SMF6_WHEAT	Uncharacterized protein	SubName: Full=Uncharacterized protein {ECO:0000313|EnsemblPlants:TRIAE_CS42_1BS_TGACv1_050399_AA0171650.1};
TRINITY_DN102_c0_g1_i2	tr|A0A1D5SMF6|A0A1D5SMF6_WHEAT	334	1.5e-161	578.2	70.9		A0A1D5SMF6_WHEAT	Uncharacterized protein	SubName: Full=Uncharacterized protein {ECO:0000313|EnsemblPlants:TRIAE_CS42_1BS_TGACv1_050399_AA0171650.1};
TRINITY_DN102_c0_g1_i4	tr|W5ALB8|W5ALB8_WHEAT	238	1.7e-125	458.4	51		W5ALB8_WHEAT	Uncharacterized protein	SubName: Full=Uncharacterized protein {ECO:0000313|EnsemblPlants:TRIAE_CS42_1DS_TGACv1_080609_AA0250960.1};
TRINITY_DN102_c0_g1_i7	tr|W5ALB8|W5ALB8_WHEAT	238	1.6e-125	458.4	51.7		W5ALB8_WHEAT	Uncharacterized protein	SubName: Full=Uncharacterized protein {ECO:0000313|EnsemblPlants:TRIAE_CS42_1DS_TGACv1_080609_AA0250960.1};
TRINITY_DN102_c0_g1_i5	tr|A0A1D5SMF6|A0A1D5SMF6_WHEAT	334	3.3e-161	577	70.9		A0A1D5SMF6_WHEAT	Uncharacterized protein	SubName: Full=Uncharacterized protein {ECO:0000313|EnsemblPlants:TRIAE_CS42_1BS_TGACv1_050399_AA0171650.1};
TRINITY_DN102_c0_g1_i3	tr|W5ALB8|W5ALB8_WHEAT	190	5e-98	366.7	54.2		W5ALB8_WHEAT	Uncharacterized protein	SubName: Full=Uncharacterized protein {ECO:0000313|EnsemblPlants:TRIAE_CS42_1DS_TGACv1_080609_AA0250960.1};
TRINITY_DN166_c0_g1_i3	tr|A0A1D5YE94|A0A1D5YE94_WHEAT	895	0	1853.6	96.4		A0A1D5YE94_WHEAT	Uncharacterized protein	SubName: Full=Uncharacterized protein {ECO:0000313|EnsemblPlants:TRIAE_CS42_5AL_TGACv1_374471_AA1201060.4};
TRINITY_DN166_c0_g1_i1	tr|A0A1D5YE94|A0A1D5YE94_WHEAT	942	0	1948.7	85.7		A0A1D5YE94_WHEAT	Uncharacterized protein	SubName: Full=Uncharacterized protein {ECO:0000313|EnsemblPlants:TRIAE_CS42_5AL_TGACv1_374471_AA1201060.4};
TRINITY_DN166_c0_g1_i2	tr|A0A287R782|A0A287R782_HORVV	967	0	1895.6	85.1		A0A287R782_HORVV	Uncharacterized protein	SubName: Full=Uncharacterized protein {ECO:0000313|EnsemblPlants:HORVU5Hr1G051240.4};
TRINITY_DN181_c0_g1_i2	tr|A0A1D6BGJ0|A0A1D6BGJ0_WHEAT	319	4.2e-179	636.3	72.2		A0A1D6BGJ0_WHEAT	Uncharacterized protein	SubName: Full=Uncharacterized protein {ECO:0000313|EnsemblPlants:TRIAE_CS42_6DS_TGACv1_544181_AA1747050.1};
TRINITY_DN181_c0_g1_i5	tr|A0A1D6BGJ0|A0A1D6BGJ0_WHEAT	189	1.3e-105	392.1	46.7		A0A1D6BGJ0_WHEAT	Uncharacterized protein	SubName: Full=Uncharacterized protein {ECO:0000313|EnsemblPlants:TRIAE_CS42_6DS_TGACv1_544181_AA1747050.1};
TRINITY_DN181_c0_g1_i8	tr|A0A1D6AXB7|A0A1D6AXB7_WHEAT	280	1.2e-157	564.7	83.1		A0A1D6AXB7_WHEAT	Uncharacterized protein	SubName: Full=Uncharacterized protein {ECO:0000313|EnsemblPlants:TRIAE_CS42_6BS_TGACv1_513736_AA1648220.1};
TRINITY_DN181_c0_g1_i4	tr|A0A1D6BGJ0|A0A1D6BGJ0_WHEAT	284	5.4e-150	539.3	83.8		A0A1D6BGJ0_WHEAT	Uncharacterized protein	SubName: Full=Uncharacterized protein {ECO:0000313|EnsemblPlants:TRIAE_CS42_6DS_TGACv1_544181_AA1747050.1};
TRINITY_DN181_c0_g1_i6	tr|A0A1D6BGJ0|A0A1D6BGJ0_WHEAT	319	3e-179	637.1	59.1		A0A1D6BGJ0_WHEAT	Uncharacterized protein	SubName: Full=Uncharacterized protein {ECO:0000313|EnsemblPlants:TRIAE_CS42_6DS_TGACv1_544181_AA1747050.1};
TRINITY_DN181_c0_g1_i3	tr|A0A1D6BGJ0|A0A1D6BGJ0_WHEAT	319	1.1e-173	618.2	80.9		A0A1D6BGJ0_WHEAT	Uncharacterized protein	SubName: Full=Uncharacterized protein {ECO:0000313|EnsemblPlants:TRIAE_CS42_6DS_TGACv1_544181_AA1747050.1};
TRINITY_DN181_c0_g1_i7	tr|A0A1D6BGJ0|A0A1D6BGJ0_WHEAT	231	3.2e-83	318.2	41.6		A0A1D6BGJ0_WHEAT	Uncharacterized protein	SubName: Full=Uncharacterized protein {ECO:0000313|EnsemblPlants:TRIAE_CS42_6DS_TGACv1_544181_AA1747050.1};
TRINITY_DN181_c0_g1_i1	tr|W5GGQ1|W5GGQ1_WHEAT	323	1.1e-115	426	55.7		W5GGQ1_WHEAT	Uncharacterized protein	SubName: Full=Uncharacterized protein {ECO:0000313|EnsemblPlants:TRIAE_CS42_6AS_TGACv1_487556_AA1571470.1};
TRINITY_DN181_c0_g2_i1	tr|N1R2K4|N1R2K4_AEGTA	96	1e-44	188.3	66.7	ORFNames=F775_31213 {ECO:0000313|EMBL:EMT19932.1};	N1R2K4_AEGTA	Chlorophyllase-1	SubName: Full=Chlorophyllase-1 {ECO:0000313|EMBL:EMT19932.1, ECO:0000313|EnsemblPlants:EMT19932};
TRINITY_DN168_c0_g2_i5	tr|M8AS70|M8AS70_AEGTA	493	3.3e-222	780	80.8	ORFNames=F775_08049 {ECO:0000313|EMBL:EMT07332.1};	M8AS70_AEGTA	S-adenosylmethionine decarboxylase proenzyme	SubName: Full=S-adenosylmethionine decarboxylase proenzyme {ECO:0000313|EMBL:EMT07332.1, ECO:0000313|EnsemblPlants:EMT07332};
TRINITY_DN168_c0_g2_i3	tr|M8AS70|M8AS70_AEGTA	381	3.6e-211	744.6	26.8	ORFNames=F775_08049 {ECO:0000313|EMBL:EMT07332.1};	M8AS70_AEGTA	S-adenosylmethionine decarboxylase proenzyme	SubName: Full=S-adenosylmethionine decarboxylase proenzyme {ECO:0000313|EMBL:EMT07332.1, ECO:0000313|EnsemblPlants:EMT07332};
TRINITY_DN168_c0_g2_i6	tr|D4P705|D4P705_LEYCH	49	5.3e-15	89.7	30.7	Name=SAMDC2 {ECO:0000313|EMBL:ADD70014.1};	D4P705_LEYCH	Small uORF	SubName: Full=Small uORF {ECO:0000313|EMBL:ADD70014.1}; EC=4.1.1.50 {ECO:0000313|EMBL:ADD70014.1};
TRINITY_DN168_c0_g2_i9	tr|W5AVG7|W5AVG7_WHEAT	245	3.3e-136	493.8	56.4		W5AVG7_WHEAT	S-adenosylmethionine decarboxylase proenzyme	RecName: Full=S-adenosylmethionine decarboxylase proenzyme {ECO:0000256|PIRNR:PIRNR001355}; EC=4.1.1.50 {ECO:0000256|PIRNR:PIRNR001355};
TRINITY_DN168_c0_g2_i1	tr|M8AS70|M8AS70_AEGTA	381	7.1e-212	746.9	27	ORFNames=F775_08049 {ECO:0000313|EMBL:EMT07332.1};	M8AS70_AEGTA	S-adenosylmethionine decarboxylase proenzyme	SubName: Full=S-adenosylmethionine decarboxylase proenzyme {ECO:0000313|EMBL:EMT07332.1, ECO:0000313|EnsemblPlants:EMT07332};
TRINITY_DN168_c0_g2_i11	tr|M8AS70|M8AS70_AEGTA	487	2.4e-219	770.4	86.4	ORFNames=F775_08049 {ECO:0000313|EMBL:EMT07332.1};	M8AS70_AEGTA	S-adenosylmethionine decarboxylase proenzyme	SubName: Full=S-adenosylmethionine decarboxylase proenzyme {ECO:0000313|EMBL:EMT07332.1, ECO:0000313|EnsemblPlants:EMT07332};
TRINITY_DN168_c0_g2_i4	tr|A0A287IS41|A0A287IS41_HORVV	189	5.8e-97	363.2	51.3		A0A287IS41_HORVV	Uncharacterized protein	SubName: Full=Uncharacterized protein {ECO:0000313|EnsemblPlants:HORVU2Hr1G086140.5};
TRINITY_DN168_c0_g2_i10	tr|A0A287IS41|A0A287IS41_HORVV	197	3.2e-103	384	52.6		A0A287IS41_HORVV	Uncharacterized protein	SubName: Full=Uncharacterized protein {ECO:0000313|EnsemblPlants:HORVU2Hr1G086140.5};
TRINITY_DN168_c0_g2_i8	tr|A0A1D5YIH2|A0A1D5YIH2_WHEAT	187	1.4e-98	368.6	49.9		A0A1D5YIH2_WHEAT	S-adenosylmethionine decarboxylase proenzyme	RecName: Full=S-adenosylmethionine decarboxylase proenzyme {ECO:0000256|PIRNR:PIRNR001355}; EC=4.1.1.50 {ECO:0000256|PIRNR:PIRNR001355};
TRINITY_DN168_c0_g2_i2	tr|A0A287IS41|A0A287IS41_HORVV	253	2.6e-136	494.2	58.2		A0A287IS41_HORVV	Uncharacterized protein	SubName: Full=Uncharacterized protein {ECO:0000313|EnsemblPlants:HORVU2Hr1G086140.5};
TRINITY_DN168_c0_g2_i7	tr|M8AS70|M8AS70_AEGTA	493	4.5e-222	780.8	34.8	ORFNames=F775_08049 {ECO:0000313|EMBL:EMT07332.1};	M8AS70_AEGTA	S-adenosylmethionine decarboxylase proenzyme	SubName: Full=S-adenosylmethionine decarboxylase proenzyme {ECO:0000313|EMBL:EMT07332.1, ECO:0000313|EnsemblPlants:EMT07332};
TRINITY_DN168_c1_g1_i1	tr|M8AS70|M8AS70_AEGTA	142	1.1e-26	128.6	86.4	ORFNames=F775_08049 {ECO:0000313|EMBL:EMT07332.1};	M8AS70_AEGTA	S-adenosylmethionine decarboxylase proenzyme	SubName: Full=S-adenosylmethionine decarboxylase proenzyme {ECO:0000313|EMBL:EMT07332.1, ECO:0000313|EnsemblPlants:EMT07332};
TRINITY_DN168_c1_g1_i2	tr|M8AS70|M8AS70_AEGTA	142	5.6e-27	129.8	74.3	ORFNames=F775_08049 {ECO:0000313|EMBL:EMT07332.1};	M8AS70_AEGTA	S-adenosylmethionine decarboxylase proenzyme	SubName: Full=S-adenosylmethionine decarboxylase proenzyme {ECO:0000313|EMBL:EMT07332.1, ECO:0000313|EnsemblPlants:EMT07332};
TRINITY_DN195_c0_g1_i1	tr|D8L9M8|D8L9M8_WHEAT	301	7.1e-167	595.9	60.8	ORFNames=TAA_ctg0464b.00230.1 {ECO:0000313|EMBL:CBH32582.1}, TRAES_3BF006700030CFD_c1 {ECO:0000313|EMBL:CDM85150.1};	D8L9M8_WHEAT	RNA recognition domain containing protein,expressed	SubName: Full=RNA recognition domain containing protein,expressed {ECO:0000313|EMBL:CBH32582.1, ECO:0000313|EnsemblPlants:TRIAE_CS42_3B_TGACv1_225151_AA0805480.1};
TRINITY_DN195_c0_g1_i2	tr|D8L9M8|D8L9M8_WHEAT	439	3e-247	863.2	70.1	ORFNames=TAA_ctg0464b.00230.1 {ECO:0000313|EMBL:CBH32582.1}, TRAES_3BF006700030CFD_c1 {ECO:0000313|EMBL:CDM85150.1};	D8L9M8_WHEAT	RNA recognition domain containing protein,expressed	SubName: Full=RNA recognition domain containing protein,expressed {ECO:0000313|EMBL:CBH32582.1, ECO:0000313|EnsemblPlants:TRIAE_CS42_3B_TGACv1_225151_AA0805480.1};
TRINITY_DN195_c0_g1_i5	tr|D8L9M8|D8L9M8_WHEAT	439	3.9e-247	862.8	70.3	ORFNames=TAA_ctg0464b.00230.1 {ECO:0000313|EMBL:CBH32582.1}, TRAES_3BF006700030CFD_c1 {ECO:0000313|EMBL:CDM85150.1};	D8L9M8_WHEAT	RNA recognition domain containing protein,expressed	SubName: Full=RNA recognition domain containing protein,expressed {ECO:0000313|EMBL:CBH32582.1, ECO:0000313|EnsemblPlants:TRIAE_CS42_3B_TGACv1_225151_AA0805480.1};
TRINITY_DN195_c0_g1_i3	tr|D8L9M8|D8L9M8_WHEAT	439	3.9e-247	862.8	70.1	ORFNames=TAA_ctg0464b.00230.1 {ECO:0000313|EMBL:CBH32582.1}, TRAES_3BF006700030CFD_c1 {ECO:0000313|EMBL:CDM85150.1};	D8L9M8_WHEAT	RNA recognition domain containing protein,expressed	SubName: Full=RNA recognition domain containing protein,expressed {ECO:0000313|EMBL:CBH32582.1, ECO:0000313|EnsemblPlants:TRIAE_CS42_3B_TGACv1_225151_AA0805480.1};
TRINITY_DN195_c1_g1_i2	tr|Q9MQV1|Q9MQV1_WHEAT	892	0	1780.4	73		Q9MQV1_WHEAT	DNA-directed RNA polymerase	RecName: Full=DNA-directed RNA polymerase {ECO:0000256|RuleBase:RU003805}; EC=2.7.7.6 {ECO:0000256|RuleBase:RU003805};
TRINITY_DN195_c1_g2_i7	tr|A0A1D5TRE2|A0A1D5TRE2_WHEAT	153	2.7e-76	295.8	17.3		A0A1D5TRE2_WHEAT	Uncharacterized protein	SubName: Full=Uncharacterized protein {ECO:0000313|EnsemblPlants:TRIAE_CS42_2AS_TGACv1_114704_AA0369010.1};
TRINITY_DN195_c1_g2_i13	tr|A0A1D5TRE2|A0A1D5TRE2_WHEAT	153	2.9e-76	295.8	16		A0A1D5TRE2_WHEAT	Uncharacterized protein	SubName: Full=Uncharacterized protein {ECO:0000313|EnsemblPlants:TRIAE_CS42_2AS_TGACv1_114704_AA0369010.1};
TRINITY_DN195_c1_g2_i11	tr|A0A1D5TRE2|A0A1D5TRE2_WHEAT	153	2.8e-76	295.8	16.9		A0A1D5TRE2_WHEAT	Uncharacterized protein	SubName: Full=Uncharacterized protein {ECO:0000313|EnsemblPlants:TRIAE_CS42_2AS_TGACv1_114704_AA0369010.1};
TRINITY_DN195_c1_g2_i10	tr|A0A1D5TRE2|A0A1D5TRE2_WHEAT	126	6.3e-57	230.3	31.9		A0A1D5TRE2_WHEAT	Uncharacterized protein	SubName: Full=Uncharacterized protein {ECO:0000313|EnsemblPlants:TRIAE_CS42_2AS_TGACv1_114704_AA0369010.1};
TRINITY_DN195_c1_g2_i4	tr|N1QY46|N1QY46_AEGTA	45	7.6e-13	84.7	6.3	ORFNames=F775_13669 {ECO:0000313|EMBL:EMT16881.1};	N1QY46_AEGTA	Putative serine/threonine-protein kinase NAK	SubName: Full=Putative serine/threonine-protein kinase NAK {ECO:0000313|EMBL:EMT16881.1, ECO:0000313|EnsemblPlants:EMT16881};
TRINITY_DN195_c1_g2_i12	tr|A0A1D5TRE2|A0A1D5TRE2_WHEAT	153	3.1e-76	295.8	15.1		A0A1D5TRE2_WHEAT	Uncharacterized protein	SubName: Full=Uncharacterized protein {ECO:0000313|EnsemblPlants:TRIAE_CS42_2AS_TGACv1_114704_AA0369010.1};
TRINITY_DN195_c1_g2_i3	tr|N1QY46|N1QY46_AEGTA	45	7.4e-13	84.7	6.5	ORFNames=F775_13669 {ECO:0000313|EMBL:EMT16881.1};	N1QY46_AEGTA	Putative serine/threonine-protein kinase NAK	SubName: Full=Putative serine/threonine-protein kinase NAK {ECO:0000313|EMBL:EMT16881.1, ECO:0000313|EnsemblPlants:EMT16881};
TRINITY_DN195_c1_g2_i9	tr|A0A1D5TRE2|A0A1D5TRE2_WHEAT	153	3.3e-76	295.8	14.3		A0A1D5TRE2_WHEAT	Uncharacterized protein	SubName: Full=Uncharacterized protein {ECO:0000313|EnsemblPlants:TRIAE_CS42_2AS_TGACv1_114704_AA0369010.1};
TRINITY_DN195_c1_g2_i1	tr|A0A1D5TRE2|A0A1D5TRE2_WHEAT	153	2.3e-76	295.8	20.1		A0A1D5TRE2_WHEAT	Uncharacterized protein	SubName: Full=Uncharacterized protein {ECO:0000313|EnsemblPlants:TRIAE_CS42_2AS_TGACv1_114704_AA0369010.1};
TRINITY_DN195_c1_g2_i8	tr|M7ZPZ0|M7ZPZ0_TRIUA	187	4e-21	112.5	21.9	ORFNames=TRIUR3_33299 {ECO:0000313|EMBL:EMS62167.1};	M7ZPZ0_TRIUA	Uncharacterized protein	SubName: Full=Uncharacterized protein {ECO:0000313|EMBL:EMS62167.1, ECO:0000313|EnsemblPlants:TRIUR3_33299-P1};
TRINITY_DN195_c1_g2_i6	tr|A0A1D5TRE2|A0A1D5TRE2_WHEAT	126	1.2e-56	230.3	16.9		A0A1D5TRE2_WHEAT	Uncharacterized protein	SubName: Full=Uncharacterized protein {ECO:0000313|EnsemblPlants:TRIAE_CS42_2AS_TGACv1_114704_AA0369010.1};
TRINITY_DN116_c0_g1_i3	tr|A0A1D6APK2|A0A1D6APK2_WHEAT	303	1.7e-143	517.7	87.7		A0A1D6APK2_WHEAT	Uncharacterized protein	SubName: Full=Uncharacterized protein {ECO:0000313|EnsemblPlants:TRIAE_CS42_6BL_TGACv1_500415_AA1604250.1};
TRINITY_DN116_c0_g1_i2	tr|A0A1D6B3Y7|A0A1D6B3Y7_WHEAT	300	2.1e-143	517.7	70.5		A0A1D6B3Y7_WHEAT	Uncharacterized protein	SubName: Full=Uncharacterized protein {ECO:0000313|EnsemblPlants:TRIAE_CS42_6DL_TGACv1_526515_AA1685880.1};
TRINITY_DN116_c0_g1_i4	tr|A0A1D6APK2|A0A1D6APK2_WHEAT	303	2.2e-143	517.7	70.1		A0A1D6APK2_WHEAT	Uncharacterized protein	SubName: Full=Uncharacterized protein {ECO:0000313|EnsemblPlants:TRIAE_CS42_6BL_TGACv1_500415_AA1604250.1};
TRINITY_DN116_c0_g1_i1	tr|A0A1D6AAH0|A0A1D6AAH0_WHEAT	300	3.1e-142	513.8	70.3		A0A1D6AAH0_WHEAT	Uncharacterized protein	SubName: Full=Uncharacterized protein {ECO:0000313|EnsemblPlants:TRIAE_CS42_6AL_TGACv1_472556_AA1523520.1};
TRINITY_DN183_c0_g1_i3	tr|W5FHT6|W5FHT6_WHEAT	175	1.3e-95	359	41.1		W5FHT6_WHEAT	Uncharacterized protein	SubName: Full=Uncharacterized protein {ECO:0000313|EnsemblPlants:TRIAE_CS42_5BL_TGACv1_406043_AA1339660.2};
TRINITY_DN183_c0_g1_i4	tr|W5FHT6|W5FHT6_WHEAT	125	8.5e-66	260.4	21.1		W5FHT6_WHEAT	Uncharacterized protein	SubName: Full=Uncharacterized protein {ECO:0000313|EnsemblPlants:TRIAE_CS42_5BL_TGACv1_406043_AA1339660.2};
TRINITY_DN183_c0_g1_i5	tr|W5FHT6|W5FHT6_WHEAT	175	1.8e-95	359	29		W5FHT6_WHEAT	Uncharacterized protein	SubName: Full=Uncharacterized protein {ECO:0000313|EnsemblPlants:TRIAE_CS42_5BL_TGACv1_406043_AA1339660.2};
TRINITY_DN183_c0_g1_i1	tr|A0A096UT45|A0A096UT45_WHEAT	58	3.5e-24	119.4	64.7		A0A096UT45_WHEAT	Uncharacterized protein	SubName: Full=Uncharacterized protein {ECO:0000313|EnsemblPlants:TRIAE_CS42_5AL_TGACv1_374181_AA1192630.1};
TRINITY_DN183_c0_g1_i2	tr|W5FHT6|W5FHT6_WHEAT	89	1.4e-44	188	56.3		W5FHT6_WHEAT	Uncharacterized protein	SubName: Full=Uncharacterized protein {ECO:0000313|EnsemblPlants:TRIAE_CS42_5BL_TGACv1_406043_AA1339660.2};
TRINITY_DN183_c0_g2_i2	tr|M8AUK6|M8AUK6_AEGTA	37	2e-06	60.8	27.2	ORFNames=F775_05814 {ECO:0000313|EMBL:EMT08152.1};	M8AUK6_AEGTA	Uncharacterized protein	SubName: Full=Uncharacterized protein {ECO:0000313|EMBL:EMT08152.1, ECO:0000313|EnsemblPlants:EMT08152};
TRINITY_DN183_c0_g2_i1	tr|M8CA00|M8CA00_AEGTA	46	1.5e-16	96.3	11.1	ORFNames=F775_24597 {ECO:0000313|EMBL:EMT11953.1};	M8CA00_AEGTA	Uncharacterized protein	SubName: Full=Uncharacterized protein {ECO:0000313|EMBL:EMT11953.1, ECO:0000313|EnsemblPlants:EMT11953};
TRINITY_DN174_c0_g1_i3	tr|A0A1D5S7D5|A0A1D5S7D5_WHEAT	101	5.3e-45	190.3	34.5		A0A1D5S7D5_WHEAT	Uncharacterized protein	SubName: Full=Uncharacterized protein {ECO:0000313|EnsemblPlants:TRIAE_CS42_1BL_TGACv1_030539_AA0093510.1};
TRINITY_DN174_c0_g1_i2	tr|A0A1D6RFC5|A0A1D6RFC5_WHEAT	101	2.1e-43	184.9	37.2		A0A1D6RFC5_WHEAT	Uncharacterized protein	SubName: Full=Uncharacterized protein {ECO:0000313|EnsemblPlants:TRIAE_CS42_1DL_TGACv1_061388_AA0193900.1};
TRINITY_DN174_c0_g1_i1	tr|A0A1D5RQL2|A0A1D5RQL2_WHEAT	99	4.2e-43	183.3	51.9		A0A1D5RQL2_WHEAT	Uncharacterized protein	SubName: Full=Uncharacterized protein {ECO:0000313|EnsemblPlants:TRIAE_CS42_1AL_TGACv1_000340_AA0009410.1};
TRINITY_DN174_c0_g2_i5	tr|A0A1D6BGX3|A0A1D6BGX3_WHEAT	140	3.3e-51	211.1	42		A0A1D6BGX3_WHEAT	Uncharacterized protein	SubName: Full=Uncharacterized protein {ECO:0000313|EnsemblPlants:TRIAE_CS42_6DS_TGACv1_544597_AA1748840.1};
TRINITY_DN174_c0_g2_i10	tr|A0A1D6BGX3|A0A1D6BGX3_WHEAT	140	4.3e-51	211.1	32.5		A0A1D6BGX3_WHEAT	Uncharacterized protein	SubName: Full=Uncharacterized protein {ECO:0000313|EnsemblPlants:TRIAE_CS42_6DS_TGACv1_544597_AA1748840.1};
TRINITY_DN174_c0_g2_i1	tr|A0A1D6BGX3|A0A1D6BGX3_WHEAT	150	2.9e-60	241.5	35.2		A0A1D6BGX3_WHEAT	Uncharacterized protein	SubName: Full=Uncharacterized protein {ECO:0000313|EnsemblPlants:TRIAE_CS42_6DS_TGACv1_544597_AA1748840.1};
TRINITY_DN174_c0_g2_i8	tr|A0A1D6BGX3|A0A1D6BGX3_WHEAT	151	3.2e-40	175.3	28.6		A0A1D6BGX3_WHEAT	Uncharacterized protein	SubName: Full=Uncharacterized protein {ECO:0000313|EnsemblPlants:TRIAE_CS42_6DS_TGACv1_544597_AA1748840.1};
TRINITY_DN174_c0_g2_i6	tr|A0A1D6BGX3|A0A1D6BGX3_WHEAT	126	1.1e-30	143.3	26.8		A0A1D6BGX3_WHEAT	Uncharacterized protein	SubName: Full=Uncharacterized protein {ECO:0000313|EnsemblPlants:TRIAE_CS42_6DS_TGACv1_544597_AA1748840.1};
TRINITY_DN174_c0_g2_i9	tr|A0A1D6BGX3|A0A1D6BGX3_WHEAT	126	1.1e-30	143.3	27.7		A0A1D6BGX3_WHEAT	Uncharacterized protein	SubName: Full=Uncharacterized protein {ECO:0000313|EnsemblPlants:TRIAE_CS42_6DS_TGACv1_544597_AA1748840.1};
TRINITY_DN174_c0_g2_i4	tr|A0A1D6BGX3|A0A1D6BGX3_WHEAT	136	7.1e-40	174.1	24		A0A1D6BGX3_WHEAT	Uncharacterized protein	SubName: Full=Uncharacterized protein {ECO:0000313|EnsemblPlants:TRIAE_CS42_6DS_TGACv1_544597_AA1748840.1};
TRINITY_DN174_c0_g2_i3	tr|A0A1D6BGX3|A0A1D6BGX3_WHEAT	141	3.8e-31	144.8	32.4		A0A1D6BGX3_WHEAT	Uncharacterized protein	SubName: Full=Uncharacterized protein {ECO:0000313|EnsemblPlants:TRIAE_CS42_6DS_TGACv1_544597_AA1748840.1};
TRINITY_DN174_c0_g2_i7	tr|A0A1D6BGX3|A0A1D6BGX3_WHEAT	150	1.4e-38	169.5	35		A0A1D6BGX3_WHEAT	Uncharacterized protein	SubName: Full=Uncharacterized protein {ECO:0000313|EnsemblPlants:TRIAE_CS42_6DS_TGACv1_544597_AA1748840.1};
TRINITY_DN174_c0_g3_i1	tr|A0A1D6B1F0|A0A1D6B1F0_WHEAT	70	8.6e-32	144.8	70.9		A0A1D6B1F0_WHEAT	Uncharacterized protein	SubName: Full=Uncharacterized protein {ECO:0000313|EnsemblPlants:TRIAE_CS42_6BS_TGACv1_515496_AA1670460.1};
TRINITY_DN107_c0_g1_i7	tr|A0A1D5UQE8|A0A1D5UQE8_WHEAT	209	4.6e-104	387.9	27.2		A0A1D5UQE8_WHEAT	Uncharacterized protein	SubName: Full=Uncharacterized protein {ECO:0000313|EnsemblPlants:TRIAE_CS42_2DL_TGACv1_160070_AA0546350.1};
TRINITY_DN107_c0_g1_i2	tr|A0A1D5UQE8|A0A1D5UQE8_WHEAT	209	2.6e-104	388.7	27.6		A0A1D5UQE8_WHEAT	Uncharacterized protein	SubName: Full=Uncharacterized protein {ECO:0000313|EnsemblPlants:TRIAE_CS42_2DL_TGACv1_160070_AA0546350.1};
TRINITY_DN107_c0_g1_i14	tr|W5BDU7|W5BDU7_WHEAT	209	1e-103	385.2	80.1		W5BDU7_WHEAT	Uncharacterized protein	SubName: Full=Uncharacterized protein {ECO:0000313|EnsemblPlants:TRIAE_CS42_2BL_TGACv1_131087_AA0422320.1};
TRINITY_DN107_c0_g1_i8	tr|A0A1D5UQE8|A0A1D5UQE8_WHEAT	188	4.1e-92	347.8	30.9		A0A1D5UQE8_WHEAT	Uncharacterized protein	SubName: Full=Uncharacterized protein {ECO:0000313|EnsemblPlants:TRIAE_CS42_2DL_TGACv1_160070_AA0546350.1};
TRINITY_DN107_c0_g1_i16	tr|A0A1D5UQE8|A0A1D5UQE8_WHEAT	209	2.1e-104	388.7	34.5		A0A1D5UQE8_WHEAT	Uncharacterized protein	SubName: Full=Uncharacterized protein {ECO:0000313|EnsemblPlants:TRIAE_CS42_2DL_TGACv1_160070_AA0546350.1};
TRINITY_DN107_c0_g1_i1	tr|A0A1D5UQE8|A0A1D5UQE8_WHEAT	209	4.7e-104	387.9	26.4		A0A1D5UQE8_WHEAT	Uncharacterized protein	SubName: Full=Uncharacterized protein {ECO:0000313|EnsemblPlants:TRIAE_CS42_2DL_TGACv1_160070_AA0546350.1};
TRINITY_DN107_c0_g1_i10	tr|A0A1D5UQE8|A0A1D5UQE8_WHEAT	209	4.2e-104	387.9	29.4		A0A1D5UQE8_WHEAT	Uncharacterized protein	SubName: Full=Uncharacterized protein {ECO:0000313|EnsemblPlants:TRIAE_CS42_2DL_TGACv1_160070_AA0546350.1};
TRINITY_DN107_c0_g1_i6	tr|A0A1D5UQE8|A0A1D5UQE8_WHEAT	209	4.9e-104	387.9	25.3		A0A1D5UQE8_WHEAT	Uncharacterized protein	SubName: Full=Uncharacterized protein {ECO:0000313|EnsemblPlants:TRIAE_CS42_2DL_TGACv1_160070_AA0546350.1};
TRINITY_DN107_c0_g1_i5	tr|A0A1D5UQE8|A0A1D5UQE8_WHEAT	209	2.7e-104	388.7	27.3		A0A1D5UQE8_WHEAT	Uncharacterized protein	SubName: Full=Uncharacterized protein {ECO:0000313|EnsemblPlants:TRIAE_CS42_2DL_TGACv1_160070_AA0546350.1};
TRINITY_DN107_c0_g1_i11	tr|W5BDU7|W5BDU7_WHEAT	209	1.6e-103	385.2	51.2		W5BDU7_WHEAT	Uncharacterized protein	SubName: Full=Uncharacterized protein {ECO:0000313|EnsemblPlants:TRIAE_CS42_2BL_TGACv1_131087_AA0422320.1};
TRINITY_DN107_c0_g1_i3	tr|A0A1D5UQE8|A0A1D5UQE8_WHEAT	242	3.7e-110	406.4	99.7		A0A1D5UQE8_WHEAT	Uncharacterized protein	SubName: Full=Uncharacterized protein {ECO:0000313|EnsemblPlants:TRIAE_CS42_2DL_TGACv1_160070_AA0546350.1};
TRINITY_DN107_c0_g1_i17	tr|A0A1D5UQE8|A0A1D5UQE8_WHEAT	209	1.7e-104	388.7	43.3		A0A1D5UQE8_WHEAT	Uncharacterized protein	SubName: Full=Uncharacterized protein {ECO:0000313|EnsemblPlants:TRIAE_CS42_2DL_TGACv1_160070_AA0546350.1};
TRINITY_DN107_c0_g1_i18	tr|A0A1D5UQE8|A0A1D5UQE8_WHEAT	209	5e-104	387.9	25		A0A1D5UQE8_WHEAT	Uncharacterized protein	SubName: Full=Uncharacterized protein {ECO:0000313|EnsemblPlants:TRIAE_CS42_2DL_TGACv1_160070_AA0546350.1};
TRINITY_DN107_c0_g1_i9	tr|A0A1D5UQE8|A0A1D5UQE8_WHEAT	209	2.1e-104	388.7	34.9		A0A1D5UQE8_WHEAT	Uncharacterized protein	SubName: Full=Uncharacterized protein {ECO:0000313|EnsemblPlants:TRIAE_CS42_2DL_TGACv1_160070_AA0546350.1};
TRINITY_DN107_c0_g1_i12	tr|A0A1D5UQE8|A0A1D5UQE8_WHEAT	209	2.2e-104	388.7	32.6		A0A1D5UQE8_WHEAT	Uncharacterized protein	SubName: Full=Uncharacterized protein {ECO:0000313|EnsemblPlants:TRIAE_CS42_2DL_TGACv1_160070_AA0546350.1};
TRINITY_DN188_c0_g1_i2	tr|F2CRU2|F2CRU2_HORVV	65	1.1e-22	116.3	19.4		F2CRU2_HORVV	Predicted protein	SubName: Full=Predicted protein {ECO:0000313|EMBL:BAJ85563.1};
TRINITY_DN188_c0_g1_i3	tr|M7Z8M1|M7Z8M1_TRIUA	108	7.6e-20	106.3	42.3	ORFNames=TRIUR3_27799 {ECO:0000313|EMBL:EMS59543.1};	M7Z8M1_TRIUA	60S ribosomal protein L37	SubName: Full=60S ribosomal protein L37 {ECO:0000313|EMBL:EMS59543.1, ECO:0000313|EnsemblPlants:TRIUR3_27799-P1};
TRINITY_DN188_c0_g1_i4	tr|M7Z8M1|M7Z8M1_TRIUA	108	2.2e-19	106.3	14.5	ORFNames=TRIUR3_27799 {ECO:0000313|EMBL:EMS59543.1};	M7Z8M1_TRIUA	60S ribosomal protein L37	SubName: Full=60S ribosomal protein L37 {ECO:0000313|EMBL:EMS59543.1, ECO:0000313|EnsemblPlants:TRIUR3_27799-P1};
TRINITY_DN188_c0_g1_i1	tr|M7Z8M1|M7Z8M1_TRIUA	108	2.1e-19	106.3	15.1	ORFNames=TRIUR3_27799 {ECO:0000313|EMBL:EMS59543.1};	M7Z8M1_TRIUA	60S ribosomal protein L37	SubName: Full=60S ribosomal protein L37 {ECO:0000313|EMBL:EMS59543.1, ECO:0000313|EnsemblPlants:TRIUR3_27799-P1};
TRINITY_DN188_c0_g5_i2	tr|A0A0C4BK42|A0A0C4BK42_WHEAT	96	1.1e-47	199.5	26.6		A0A0C4BK42_WHEAT	Ribosomal protein L37	RecName: Full=Ribosomal protein L37 {ECO:0000256|RuleBase:RU000576};
TRINITY_DN188_c1_g1_i3	tr|M8CR57|M8CR57_AEGTA	31	5.7e-08	67	12.6	ORFNames=F775_00232 {ECO:0000313|EMBL:EMT30037.1};	M8CR57_AEGTA	Uncharacterized protein	SubName: Full=Uncharacterized protein {ECO:0000313|EMBL:EMT30037.1, ECO:0000313|EnsemblPlants:EMT30037};
TRINITY_DN188_c1_g1_i6	tr|M8CR57|M8CR57_AEGTA	31	5.3e-08	67	13.5	ORFNames=F775_00232 {ECO:0000313|EMBL:EMT30037.1};	M8CR57_AEGTA	Uncharacterized protein	SubName: Full=Uncharacterized protein {ECO:0000313|EMBL:EMT30037.1, ECO:0000313|EnsemblPlants:EMT30037};
TRINITY_DN188_c2_g1_i4	tr|M8CD45|M8CD45_AEGTA	509	4.4e-246	859.4	79.9	ORFNames=F775_31746 {ECO:0000313|EMBL:EMT32289.1};	M8CD45_AEGTA	Two-component response regulator-like PRR73	SubName: Full=Two-component response regulator-like PRR73 {ECO:0000313|EMBL:EMT32289.1, ECO:0000313|EnsemblPlants:EMT32289};
TRINITY_DN188_c2_g1_i1	tr|W5E2Y2|W5E2Y2_WHEAT	420	2.4e-198	700.3	94.1		W5E2Y2_WHEAT	Uncharacterized protein	SubName: Full=Uncharacterized protein {ECO:0000313|EnsemblPlants:TRIAE_CS42_4BL_TGACv1_321444_AA1060560.1};
TRINITY_DN188_c2_g1_i2	tr|W5E2Y2|W5E2Y2_WHEAT	511	4.2e-237	829.7	71.6		W5E2Y2_WHEAT	Uncharacterized protein	SubName: Full=Uncharacterized protein {ECO:0000313|EnsemblPlants:TRIAE_CS42_4BL_TGACv1_321444_AA1060560.1};
TRINITY_DN188_c2_g1_i5	tr|W5E2Y2|W5E2Y2_WHEAT	511	1.6e-235	824.3	80		W5E2Y2_WHEAT	Uncharacterized protein	SubName: Full=Uncharacterized protein {ECO:0000313|EnsemblPlants:TRIAE_CS42_4BL_TGACv1_321444_AA1060560.1};
TRINITY_DN188_c2_g1_i6	tr|M8CD45|M8CD45_AEGTA	509	5.6e-244	852.4	77	ORFNames=F775_31746 {ECO:0000313|EMBL:EMT32289.1};	M8CD45_AEGTA	Two-component response regulator-like PRR73	SubName: Full=Two-component response regulator-like PRR73 {ECO:0000313|EMBL:EMT32289.1, ECO:0000313|EnsemblPlants:EMT32289};
TRINITY_DN188_c6_g1_i1	tr|R7W340|R7W340_AEGTA	41	7.2e-12	78.6	43.9	ORFNames=F775_01160 {ECO:0000313|EMBL:EMT13593.1};	R7W340_AEGTA	Glycosyltransferase	RecName: Full=Glycosyltransferase {ECO:0000256|RuleBase:RU362057}; EC=2.4.1.- {ECO:0000256|RuleBase:RU362057};
TRINITY_DN173_c0_g1_i10	tr|A0A1D6BW75|A0A1D6BW75_WHEAT	273	2.1e-142	514.2	71.8		A0A1D6BW75_WHEAT	Uncharacterized protein	SubName: Full=Uncharacterized protein {ECO:0000313|EnsemblPlants:TRIAE_CS42_7AS_TGACv1_569927_AA1827070.2};
TRINITY_DN173_c0_g1_i1	tr|A0A1D6CHN6|A0A1D6CHN6_WHEAT	278	4.4e-128	466.8	63.1		A0A1D6CHN6_WHEAT	Uncharacterized protein	SubName: Full=Uncharacterized protein {ECO:0000313|EnsemblPlants:TRIAE_CS42_7BS_TGACv1_592819_AA1944640.2};
TRINITY_DN173_c0_g1_i7	tr|A0A1D6CHN6|A0A1D6CHN6_WHEAT	276	2.6e-142	513.8	75.1		A0A1D6CHN6_WHEAT	Uncharacterized protein	SubName: Full=Uncharacterized protein {ECO:0000313|EnsemblPlants:TRIAE_CS42_7BS_TGACv1_592819_AA1944640.2};
TRINITY_DN173_c0_g1_i6	tr|A0A1D6CHN6|A0A1D6CHN6_WHEAT	278	4.4e-128	466.8	63.4		A0A1D6CHN6_WHEAT	Uncharacterized protein	SubName: Full=Uncharacterized protein {ECO:0000313|EnsemblPlants:TRIAE_CS42_7BS_TGACv1_592819_AA1944640.2};
TRINITY_DN173_c0_g1_i4	tr|A0A1D6BW75|A0A1D6BW75_WHEAT	185	5.3e-88	334.3	27.3		A0A1D6BW75_WHEAT	Uncharacterized protein	SubName: Full=Uncharacterized protein {ECO:0000313|EnsemblPlants:TRIAE_CS42_7AS_TGACv1_569927_AA1827070.2};
TRINITY_DN173_c0_g1_i9	tr|A0A1D6BW75|A0A1D6BW75_WHEAT	273	2.4e-142	514.2	62.6		A0A1D6BW75_WHEAT	Uncharacterized protein	SubName: Full=Uncharacterized protein {ECO:0000313|EnsemblPlants:TRIAE_CS42_7AS_TGACv1_569927_AA1827070.2};
TRINITY_DN173_c0_g1_i8	tr|A0A1D6CHN6|A0A1D6CHN6_WHEAT	94	9e-45	188.7	55.1		A0A1D6CHN6_WHEAT	Uncharacterized protein	SubName: Full=Uncharacterized protein {ECO:0000313|EnsemblPlants:TRIAE_CS42_7BS_TGACv1_592819_AA1944640.2};
TRINITY_DN173_c0_g1_i3	tr|A0A1D6BW75|A0A1D6BW75_WHEAT	185	5.3e-88	334.3	27		A0A1D6BW75_WHEAT	Uncharacterized protein	SubName: Full=Uncharacterized protein {ECO:0000313|EnsemblPlants:TRIAE_CS42_7AS_TGACv1_569927_AA1827070.2};
TRINITY_DN173_c0_g1_i2	tr|A0A1D6CHN6|A0A1D6CHN6_WHEAT	278	5.4e-128	466.8	52		A0A1D6CHN6_WHEAT	Uncharacterized protein	SubName: Full=Uncharacterized protein {ECO:0000313|EnsemblPlants:TRIAE_CS42_7BS_TGACv1_592819_AA1944640.2};
TRINITY_DN173_c0_g1_i5	tr|A0A1D6BW75|A0A1D6BW75_WHEAT	185	4.6e-88	334.3	31.3		A0A1D6BW75_WHEAT	Uncharacterized protein	SubName: Full=Uncharacterized protein {ECO:0000313|EnsemblPlants:TRIAE_CS42_7AS_TGACv1_569927_AA1827070.2};
TRINITY_DN108_c0_g2_i1	tr|A0A1D5SAF6|A0A1D5SAF6_WHEAT	75	3.5e-36	159.1	95.3		A0A1D5SAF6_WHEAT	Uncharacterized protein	SubName: Full=Uncharacterized protein {ECO:0000313|EnsemblPlants:TRIAE_CS42_1BL_TGACv1_031122_AA0108180.1};
TRINITY_DN108_c0_g2_i2	tr|A0A1D5RTK6|A0A1D5RTK6_WHEAT	75	5.1e-36	159.5	50.4		A0A1D5RTK6_WHEAT	Uncharacterized protein	SubName: Full=Uncharacterized protein {ECO:0000313|EnsemblPlants:TRIAE_CS42_1AL_TGACv1_001038_AA0023900.1};
TRINITY_DN108_c1_g1_i19	tr|A0A1D5WS62|A0A1D5WS62_WHEAT	137	4.1e-45	189.9	55.7		A0A1D5WS62_WHEAT	Uncharacterized protein	SubName: Full=Uncharacterized protein {ECO:0000313|EnsemblPlants:TRIAE_CS42_3DS_TGACv1_271934_AA0911360.1};
TRINITY_DN108_c1_g1_i10	tr|A0A1D5WS62|A0A1D5WS62_WHEAT	59	2.7e-25	125.6	12		A0A1D5WS62_WHEAT	Uncharacterized protein	SubName: Full=Uncharacterized protein {ECO:0000313|EnsemblPlants:TRIAE_CS42_3DS_TGACv1_271934_AA0911360.1};
TRINITY_DN108_c1_g1_i11	tr|A0A1D5WS62|A0A1D5WS62_WHEAT	137	7e-45	189.1	55.8		A0A1D5WS62_WHEAT	Uncharacterized protein	SubName: Full=Uncharacterized protein {ECO:0000313|EnsemblPlants:TRIAE_CS42_3DS_TGACv1_271934_AA0911360.1};
TRINITY_DN108_c1_g1_i13	tr|A0A1D5WS62|A0A1D5WS62_WHEAT	137	2.5e-44	189.1	15.4		A0A1D5WS62_WHEAT	Uncharacterized protein	SubName: Full=Uncharacterized protein {ECO:0000313|EnsemblPlants:TRIAE_CS42_3DS_TGACv1_271934_AA0911360.1};
TRINITY_DN108_c1_g1_i7	tr|A0A1D5WS62|A0A1D5WS62_WHEAT	137	1.4e-44	189.9	16.6		A0A1D5WS62_WHEAT	Uncharacterized protein	SubName: Full=Uncharacterized protein {ECO:0000313|EnsemblPlants:TRIAE_CS42_3DS_TGACv1_271934_AA0911360.1};
TRINITY_DN108_c1_g1_i24	tr|A0A1D5WS62|A0A1D5WS62_WHEAT	137	2.4e-44	189.1	16		A0A1D5WS62_WHEAT	Uncharacterized protein	SubName: Full=Uncharacterized protein {ECO:0000313|EnsemblPlants:TRIAE_CS42_3DS_TGACv1_271934_AA0911360.1};
TRINITY_DN108_c1_g1_i8	tr|A0A1D5WS62|A0A1D5WS62_WHEAT	137	1.4e-44	189.9	16.2		A0A1D5WS62_WHEAT	Uncharacterized protein	SubName: Full=Uncharacterized protein {ECO:0000313|EnsemblPlants:TRIAE_CS42_3DS_TGACv1_271934_AA0911360.1};
TRINITY_DN108_c1_g1_i2	tr|A0A1D5WS62|A0A1D5WS62_WHEAT	50	5.4e-23	115.2	69.4		A0A1D5WS62_WHEAT	Uncharacterized protein	SubName: Full=Uncharacterized protein {ECO:0000313|EnsemblPlants:TRIAE_CS42_3DS_TGACv1_271934_AA0911360.1};
TRINITY_DN108_c1_g1_i21	tr|A0A1D5WS62|A0A1D5WS62_WHEAT	137	1.3e-44	189.9	17.6		A0A1D5WS62_WHEAT	Uncharacterized protein	SubName: Full=Uncharacterized protein {ECO:0000313|EnsemblPlants:TRIAE_CS42_3DS_TGACv1_271934_AA0911360.1};
TRINITY_DN108_c1_g1_i1	tr|A0A1D5WS62|A0A1D5WS62_WHEAT	137	2.5e-44	189.1	15.6		A0A1D5WS62_WHEAT	Uncharacterized protein	SubName: Full=Uncharacterized protein {ECO:0000313|EnsemblPlants:TRIAE_CS42_3DS_TGACv1_271934_AA0911360.1};
TRINITY_DN108_c1_g1_i4	tr|A0A1D5WS62|A0A1D5WS62_WHEAT	137	1.5e-44	189.9	14.8		A0A1D5WS62_WHEAT	Uncharacterized protein	SubName: Full=Uncharacterized protein {ECO:0000313|EnsemblPlants:TRIAE_CS42_3DS_TGACv1_271934_AA0911360.1};
TRINITY_DN108_c1_g1_i20	tr|A0A1D5WS62|A0A1D5WS62_WHEAT	137	9.5e-45	189.1	41		A0A1D5WS62_WHEAT	Uncharacterized protein	SubName: Full=Uncharacterized protein {ECO:0000313|EnsemblPlants:TRIAE_CS42_3DS_TGACv1_271934_AA0911360.1};
TRINITY_DN108_c1_g1_i5	tr|A0A1D5WS62|A0A1D5WS62_WHEAT	137	5.6e-45	189.9	40.9		A0A1D5WS62_WHEAT	Uncharacterized protein	SubName: Full=Uncharacterized protein {ECO:0000313|EnsemblPlants:TRIAE_CS42_3DS_TGACv1_271934_AA0911360.1};
TRINITY_DN108_c1_g1_i9	tr|A0A1D5WS62|A0A1D5WS62_WHEAT	137	1.5e-44	189.9	15.4		A0A1D5WS62_WHEAT	Uncharacterized protein	SubName: Full=Uncharacterized protein {ECO:0000313|EnsemblPlants:TRIAE_CS42_3DS_TGACv1_271934_AA0911360.1};
TRINITY_DN108_c1_g1_i15	tr|A0A1D5WS62|A0A1D5WS62_WHEAT	137	1.5e-44	189.9	15.6		A0A1D5WS62_WHEAT	Uncharacterized protein	SubName: Full=Uncharacterized protein {ECO:0000313|EnsemblPlants:TRIAE_CS42_3DS_TGACv1_271934_AA0911360.1};
TRINITY_DN108_c1_g1_i16	tr|A0A1D5WS62|A0A1D5WS62_WHEAT	137	2.2e-44	189.1	17.6		A0A1D5WS62_WHEAT	Uncharacterized protein	SubName: Full=Uncharacterized protein {ECO:0000313|EnsemblPlants:TRIAE_CS42_3DS_TGACv1_271934_AA0911360.1};
TRINITY_DN108_c1_g1_i18	tr|A0A1D5WS62|A0A1D5WS62_WHEAT	50	9e-23	114.4	69.8		A0A1D5WS62_WHEAT	Uncharacterized protein	SubName: Full=Uncharacterized protein {ECO:0000313|EnsemblPlants:TRIAE_CS42_3DS_TGACv1_271934_AA0911360.1};
TRINITY_DN108_c1_g1_i3	tr|A0A1D5WS62|A0A1D5WS62_WHEAT	59	2.6e-25	125.6	12.7		A0A1D5WS62_WHEAT	Uncharacterized protein	SubName: Full=Uncharacterized protein {ECO:0000313|EnsemblPlants:TRIAE_CS42_3DS_TGACv1_271934_AA0911360.1};
TRINITY_DN108_c1_g1_i14	tr|A0A1D5WS62|A0A1D5WS62_WHEAT	137	2.6e-44	189.1	14.8		A0A1D5WS62_WHEAT	Uncharacterized protein	SubName: Full=Uncharacterized protein {ECO:0000313|EnsemblPlants:TRIAE_CS42_3DS_TGACv1_271934_AA0911360.1};
TRINITY_DN108_c1_g1_i23	tr|A0A1D5WS62|A0A1D5WS62_WHEAT	137	2.3e-44	189.1	16.6		A0A1D5WS62_WHEAT	Uncharacterized protein	SubName: Full=Uncharacterized protein {ECO:0000313|EnsemblPlants:TRIAE_CS42_3DS_TGACv1_271934_AA0911360.1};
TRINITY_DN108_c1_g1_i12	tr|A0A1D5WS62|A0A1D5WS62_WHEAT	137	1.4e-44	189.9	15.9		A0A1D5WS62_WHEAT	Uncharacterized protein	SubName: Full=Uncharacterized protein {ECO:0000313|EnsemblPlants:TRIAE_CS42_3DS_TGACv1_271934_AA0911360.1};
TRINITY_DN108_c1_g1_i17	tr|A0A1D5WS62|A0A1D5WS62_WHEAT	137	2.4e-44	189.1	16.2		A0A1D5WS62_WHEAT	Uncharacterized protein	SubName: Full=Uncharacterized protein {ECO:0000313|EnsemblPlants:TRIAE_CS42_3DS_TGACv1_271934_AA0911360.1};
TRINITY_DN108_c1_g2_i2	tr|A0A1D6C435|A0A1D6C435_WHEAT	378	3.5e-168	600.1	81.7		A0A1D6C435_WHEAT	Uncharacterized protein	SubName: Full=Uncharacterized protein {ECO:0000313|EnsemblPlants:TRIAE_CS42_7BL_TGACv1_577210_AA1869150.1};
TRINITY_DN108_c1_g2_i1	tr|A0A1D6BN07|A0A1D6BN07_WHEAT	285	1.7e-155	558.5	43.3		A0A1D6BN07_WHEAT	Uncharacterized protein	SubName: Full=Uncharacterized protein {ECO:0000313|EnsemblPlants:TRIAE_CS42_7AL_TGACv1_557437_AA1781340.2};
TRINITY_DN108_c2_g1_i3	tr|W5H748|W5H748_WHEAT	293	4.4e-165	589.7	68.2		W5H748_WHEAT	Uncharacterized protein	SubName: Full=Uncharacterized protein {ECO:0000313|EnsemblPlants:TRIAE_CS42_7AL_TGACv1_556307_AA1760450.1};
TRINITY_DN108_c2_g1_i1	tr|W5H748|W5H748_WHEAT	293	3.4e-165	590.1	68.2		W5H748_WHEAT	Uncharacterized protein	SubName: Full=Uncharacterized protein {ECO:0000313|EnsemblPlants:TRIAE_CS42_7AL_TGACv1_556307_AA1760450.1};
TRINITY_DN108_c2_g1_i4	tr|W5H748|W5H748_WHEAT	190	1.7e-107	397.9	65.5		W5H748_WHEAT	Uncharacterized protein	SubName: Full=Uncharacterized protein {ECO:0000313|EnsemblPlants:TRIAE_CS42_7AL_TGACv1_556307_AA1760450.1};
TRINITY_DN108_c2_g1_i2	tr|W5H748|W5H748_WHEAT	191	3.1e-108	401	41.5		W5H748_WHEAT	Uncharacterized protein	SubName: Full=Uncharacterized protein {ECO:0000313|EnsemblPlants:TRIAE_CS42_7AL_TGACv1_556307_AA1760450.1};
TRINITY_DN108_c6_g1_i1	tr|M7ZHW6|M7ZHW6_TRIUA	48	1.9e-14	87	54.8	ORFNames=TRIUR3_24807 {ECO:0000313|EMBL:EMS51975.1};	M7ZHW6_TRIUA	Uncharacterized protein	SubName: Full=Uncharacterized protein {ECO:0000313|EMBL:EMS51975.1, ECO:0000313|EnsemblPlants:TRIUR3_24807-P1};
TRINITY_DN108_c6_g1_i4	tr|A0A287WTQ3|A0A287WTQ3_HORVV	59	3.7e-18	99.4	63.6		A0A287WTQ3_HORVV	Predicted protein	SubName: Full=Predicted protein {ECO:0000313|EnsemblPlants:HORVU7Hr1G071450.2};
TRINITY_DN108_c6_g1_i2	tr|M7ZHW6|M7ZHW6_TRIUA	67	3.6e-19	105.5	11	ORFNames=TRIUR3_24807 {ECO:0000313|EMBL:EMS51975.1};	M7ZHW6_TRIUA	Uncharacterized protein	SubName: Full=Uncharacterized protein {ECO:0000313|EMBL:EMS51975.1, ECO:0000313|EnsemblPlants:TRIUR3_24807-P1};
TRINITY_DN108_c6_g1_i3	tr|M7ZHW6|M7ZHW6_TRIUA	45	2.1e-11	78.6	16.9	ORFNames=TRIUR3_24807 {ECO:0000313|EMBL:EMS51975.1};	M7ZHW6_TRIUA	Uncharacterized protein	SubName: Full=Uncharacterized protein {ECO:0000313|EMBL:EMS51975.1, ECO:0000313|EnsemblPlants:TRIUR3_24807-P1};
TRINITY_DN108_c6_g1_i5	tr|M7ZHW6|M7ZHW6_TRIUA	46	1.8e-05	59.7	9.3	ORFNames=TRIUR3_24807 {ECO:0000313|EMBL:EMS51975.1};	M7ZHW6_TRIUA	Uncharacterized protein	SubName: Full=Uncharacterized protein {ECO:0000313|EMBL:EMS51975.1, ECO:0000313|EnsemblPlants:TRIUR3_24807-P1};
TRINITY_DN108_c6_g1_i7	tr|M7ZHW6|M7ZHW6_TRIUA	67	3.3e-19	105.5	12	ORFNames=TRIUR3_24807 {ECO:0000313|EMBL:EMS51975.1};	M7ZHW6_TRIUA	Uncharacterized protein	SubName: Full=Uncharacterized protein {ECO:0000313|EMBL:EMS51975.1, ECO:0000313|EnsemblPlants:TRIUR3_24807-P1};
TRINITY_DN156_c0_g1_i1	tr|A0A1D6CXB8|A0A1D6CXB8_WHEAT	553	5.7e-220	772.7	83.4		A0A1D6CXB8_WHEAT	Uncharacterized protein	SubName: Full=Uncharacterized protein {ECO:0000313|EnsemblPlants:TRIAE_CS42_7DS_TGACv1_621636_AA2021720.1};
TRINITY_DN156_c0_g1_i2	tr|A0A1D6CXB9|A0A1D6CXB9_WHEAT	561	1.6e-225	791.2	83.6		A0A1D6CXB9_WHEAT	Uncharacterized protein	SubName: Full=Uncharacterized protein {ECO:0000313|EnsemblPlants:TRIAE_CS42_7DS_TGACv1_621636_AA2021720.2};
TRINITY_DN156_c0_g2_i1	tr|A0A1D6CXB9|A0A1D6CXB9_WHEAT	49	8.7e-19	101.3	62.6		A0A1D6CXB9_WHEAT	Uncharacterized protein	SubName: Full=Uncharacterized protein {ECO:0000313|EnsemblPlants:TRIAE_CS42_7DS_TGACv1_621636_AA2021720.2};
TRINITY_DN156_c1_g1_i1	tr|A0A1B4Z170|A0A1B4Z170_ORYSI	27	1.1e-05	59.7	9.5	Name=orf128 {ECO:0000313|EMBL:BAV53213.1};	A0A1B4Z170_ORYSI	Uncharacterized protein	SubName: Full=Uncharacterized protein {ECO:0000313|EMBL:BAV53213.1};
TRINITY_DN118_c0_g1_i11	tr|M8CXJ2|M8CXJ2_AEGTA	29	2.8e-05	58.2	11.2	ORFNames=F775_24208 {ECO:0000313|EMBL:EMT32417.1};	M8CXJ2_AEGTA	Uncharacterized protein	SubName: Full=Uncharacterized protein {ECO:0000313|EMBL:EMT32417.1, ECO:0000313|EnsemblPlants:EMT32417};
TRINITY_DN118_c1_g1_i2	tr|A0A1D5ZHH2|A0A1D5ZHH2_WHEAT	368	1.4e-204	721.1	79.3		A0A1D5ZHH2_WHEAT	Uncharacterized protein	SubName: Full=Uncharacterized protein {ECO:0000313|EnsemblPlants:TRIAE_CS42_5BS_TGACv1_424362_AA1389060.1};
TRINITY_DN118_c1_g1_i3	tr|W5G1U3|W5G1U3_WHEAT	366	2.8e-205	723.4	79.2		W5G1U3_WHEAT	Uncharacterized protein	SubName: Full=Uncharacterized protein {ECO:0000313|EnsemblPlants:TRIAE_CS42_5DS_TGACv1_456516_AA1472820.1};
TRINITY_DN118_c1_g1_i1	tr|A0A1D5YTB7|A0A1D5YTB7_WHEAT	369	1.1e-204	721.5	79.4		A0A1D5YTB7_WHEAT	Uncharacterized protein	SubName: Full=Uncharacterized protein {ECO:0000313|EnsemblPlants:TRIAE_CS42_5AS_TGACv1_393017_AA1267370.1};
TRINITY_DN197_c0_g1_i1	tr|A0A287MLV9|A0A287MLV9_HORVV	227	2.2e-73	285	56.1		A0A287MLV9_HORVV	Uncharacterized protein	SubName: Full=Uncharacterized protein {ECO:0000313|EnsemblPlants:HORVU3Hr1G108110.30};
TRINITY_DN197_c0_g1_i4	tr|M8BFV8|M8BFV8_AEGTA	250	6.8e-70	273.5	60	ORFNames=F775_30026 {ECO:0000313|EMBL:EMT05628.1};	M8BFV8_AEGTA	Villin-2	SubName: Full=Villin-2 {ECO:0000313|EMBL:EMT05628.1, ECO:0000313|EnsemblPlants:EMT05628};
TRINITY_DN197_c0_g1_i2	tr|A0A287MLV9|A0A287MLV9_HORVV	227	2.1e-73	285	57.6		A0A287MLV9_HORVV	Uncharacterized protein	SubName: Full=Uncharacterized protein {ECO:0000313|EnsemblPlants:HORVU3Hr1G108110.30};
TRINITY_DN197_c0_g1_i3	tr|M8BFV8|M8BFV8_AEGTA	250	7e-70	273.5	58.5	ORFNames=F775_30026 {ECO:0000313|EMBL:EMT05628.1};	M8BFV8_AEGTA	Villin-2	SubName: Full=Villin-2 {ECO:0000313|EMBL:EMT05628.1, ECO:0000313|EnsemblPlants:EMT05628};
TRINITY_DN197_c0_g1_i5	tr|M8BFV8|M8BFV8_AEGTA	250	7e-70	272.7	99.7	ORFNames=F775_30026 {ECO:0000313|EMBL:EMT05628.1};	M8BFV8_AEGTA	Villin-2	SubName: Full=Villin-2 {ECO:0000313|EMBL:EMT05628.1, ECO:0000313|EnsemblPlants:EMT05628};
TRINITY_DN197_c0_g1_i6	tr|M8A8E1|M8A8E1_TRIUA	250	2.5e-70	274.6	72	ORFNames=TRIUR3_19654 {ECO:0000313|EMBL:EMS56739.1};	M8A8E1_TRIUA	Villin-2	SubName: Full=Villin-2 {ECO:0000313|EMBL:EMS56739.1, ECO:0000313|EnsemblPlants:TRIUR3_19654-P1};
TRINITY_DN148_c0_g1_i5	tr|A0A1D5X548|A0A1D5X548_WHEAT	763	0	1521.5	77.1		A0A1D5X548_WHEAT	Uncharacterized protein	SubName: Full=Uncharacterized protein {ECO:0000313|EnsemblPlants:TRIAE_CS42_4AL_TGACv1_289910_AA0978670.1};
TRINITY_DN148_c0_g1_i4	tr|A0A1D5X548|A0A1D5X548_WHEAT	763	0	1521.5	76.2		A0A1D5X548_WHEAT	Uncharacterized protein	SubName: Full=Uncharacterized protein {ECO:0000313|EnsemblPlants:TRIAE_CS42_4AL_TGACv1_289910_AA0978670.1};
TRINITY_DN148_c0_g1_i1	tr|A0A1D5ZKD3|A0A1D5ZKD3_WHEAT	462	3.5e-264	920.2	44.1		A0A1D5ZKD3_WHEAT	Uncharacterized protein	SubName: Full=Uncharacterized protein {ECO:0000313|EnsemblPlants:TRIAE_CS42_5DL_TGACv1_433137_AA1403290.2};
TRINITY_DN148_c0_g1_i9	tr|A0A1D5Y8V6|A0A1D5Y8V6_WHEAT	716	0	1332.8	75.7		A0A1D5Y8V6_WHEAT	Uncharacterized protein	SubName: Full=Uncharacterized protein {ECO:0000313|EnsemblPlants:TRIAE_CS42_4DS_TGACv1_362071_AA1176420.1};
TRINITY_DN148_c0_g1_i7	tr|A0A1D5X548|A0A1D5X548_WHEAT	763	0	1421.4	80.1		A0A1D5X548_WHEAT	Uncharacterized protein	SubName: Full=Uncharacterized protein {ECO:0000313|EnsemblPlants:TRIAE_CS42_4AL_TGACv1_289910_AA0978670.1};
TRINITY_DN148_c0_g1_i3	tr|A0A1D5ZKD2|A0A1D5ZKD2_WHEAT	762	0	1525	77.4		A0A1D5ZKD2_WHEAT	Uncharacterized protein	SubName: Full=Uncharacterized protein {ECO:0000313|EnsemblPlants:TRIAE_CS42_5DL_TGACv1_433137_AA1403290.1};
TRINITY_DN148_c0_g1_i6	tr|A0A1D5Y8V6|A0A1D5Y8V6_WHEAT	683	0	1364.7	89.6		A0A1D5Y8V6_WHEAT	Uncharacterized protein	SubName: Full=Uncharacterized protein {ECO:0000313|EnsemblPlants:TRIAE_CS42_4DS_TGACv1_362071_AA1176420.1};
TRINITY_DN148_c0_g1_i2	tr|A0A1D5ZKD2|A0A1D5ZKD2_WHEAT	762	0	1525.4	78.5		A0A1D5ZKD2_WHEAT	Uncharacterized protein	SubName: Full=Uncharacterized protein {ECO:0000313|EnsemblPlants:TRIAE_CS42_5DL_TGACv1_433137_AA1403290.1};
TRINITY_DN128_c0_g1_i4	tr|R7W5A0|R7W5A0_AEGTA	327	2.2e-180	641.3	44.8	ORFNames=F775_26929 {ECO:0000313|EMBL:EMT02521.1};	R7W5A0_AEGTA	30S ribosomal protein S10, chloroplastic	SubName: Full=30S ribosomal protein S10, chloroplastic {ECO:0000313|EMBL:EMT02521.1, ECO:0000313|EnsemblPlants:EMT02521};
TRINITY_DN128_c0_g1_i3	tr|R7W5A0|R7W5A0_AEGTA	327	2.6e-179	637.9	40.8	ORFNames=F775_26929 {ECO:0000313|EMBL:EMT02521.1};	R7W5A0_AEGTA	30S ribosomal protein S10, chloroplastic	SubName: Full=30S ribosomal protein S10, chloroplastic {ECO:0000313|EMBL:EMT02521.1, ECO:0000313|EnsemblPlants:EMT02521};
TRINITY_DN128_c0_g1_i6	tr|R7W5A0|R7W5A0_AEGTA	272	4.2e-145	523.5	58.7	ORFNames=F775_26929 {ECO:0000313|EMBL:EMT02521.1};	R7W5A0_AEGTA	30S ribosomal protein S10, chloroplastic	SubName: Full=30S ribosomal protein S10, chloroplastic {ECO:0000313|EMBL:EMT02521.1, ECO:0000313|EnsemblPlants:EMT02521};
TRINITY_DN128_c0_g1_i5	tr|R7W5A0|R7W5A0_AEGTA	520	4.3e-230	806.6	64.7	ORFNames=F775_26929 {ECO:0000313|EMBL:EMT02521.1};	R7W5A0_AEGTA	30S ribosomal protein S10, chloroplastic	SubName: Full=30S ribosomal protein S10, chloroplastic {ECO:0000313|EMBL:EMT02521.1, ECO:0000313|EnsemblPlants:EMT02521};
TRINITY_DN128_c0_g1_i2	tr|A0A1D5Y2R0|A0A1D5Y2R0_WHEAT	162	1.8e-84	321.6	45.9		A0A1D5Y2R0_WHEAT	Uncharacterized protein	SubName: Full=Uncharacterized protein {ECO:0000313|EnsemblPlants:TRIAE_CS42_4DL_TGACv1_344264_AA1145600.1};
TRINITY_DN128_c0_g1_i1	tr|R7W5A0|R7W5A0_AEGTA	327	2.7e-179	637.9	40.1	ORFNames=F775_26929 {ECO:0000313|EMBL:EMT02521.1};	R7W5A0_AEGTA	30S ribosomal protein S10, chloroplastic	SubName: Full=30S ribosomal protein S10, chloroplastic {ECO:0000313|EMBL:EMT02521.1, ECO:0000313|EnsemblPlants:EMT02521};
TRINITY_DN128_c0_g1_i7	tr|R7W5A0|R7W5A0_AEGTA	520	4.2e-230	806.6	65.9	ORFNames=F775_26929 {ECO:0000313|EMBL:EMT02521.1};	R7W5A0_AEGTA	30S ribosomal protein S10, chloroplastic	SubName: Full=30S ribosomal protein S10, chloroplastic {ECO:0000313|EMBL:EMT02521.1, ECO:0000313|EnsemblPlants:EMT02521};
TRINITY_DN128_c0_g1_i8	tr|R7W5A0|R7W5A0_AEGTA	524	2.4e-232	813.9	73.3	ORFNames=F775_26929 {ECO:0000313|EMBL:EMT02521.1};	R7W5A0_AEGTA	30S ribosomal protein S10, chloroplastic	SubName: Full=30S ribosomal protein S10, chloroplastic {ECO:0000313|EMBL:EMT02521.1, ECO:0000313|EnsemblPlants:EMT02521};
TRINITY_DN191_c0_g1_i6	tr|A0A1D5Z7V0|A0A1D5Z7V0_WHEAT	357	1.9e-204	720.7	72.6		A0A1D5Z7V0_WHEAT	Uncharacterized protein	SubName: Full=Uncharacterized protein {ECO:0000313|EnsemblPlants:TRIAE_CS42_5BL_TGACv1_406045_AA1339740.1};
TRINITY_DN191_c0_g1_i2	tr|A0A1D5Z7V0|A0A1D5Z7V0_WHEAT	356	1.2e-203	718	72		A0A1D5Z7V0_WHEAT	Uncharacterized protein	SubName: Full=Uncharacterized protein {ECO:0000313|EnsemblPlants:TRIAE_CS42_5BL_TGACv1_406045_AA1339740.1};
TRINITY_DN191_c0_g1_i4	tr|W5FZM1|W5FZM1_WHEAT	357	3.9e-205	723	71.9		W5FZM1_WHEAT	Uncharacterized protein	SubName: Full=Uncharacterized protein {ECO:0000313|EnsemblPlants:TRIAE_CS42_5DL_TGACv1_434941_AA1443980.2};
TRINITY_DN191_c0_g1_i5	tr|A0A1D5Z7V0|A0A1D5Z7V0_WHEAT	356	1.2e-203	718	71.4		A0A1D5Z7V0_WHEAT	Uncharacterized protein	SubName: Full=Uncharacterized protein {ECO:0000313|EnsemblPlants:TRIAE_CS42_5BL_TGACv1_406045_AA1339740.1};
TRINITY_DN191_c0_g1_i3	tr|W5FZM1|W5FZM1_WHEAT	358	1.3e-205	724.5	71.7		W5FZM1_WHEAT	Uncharacterized protein	SubName: Full=Uncharacterized protein {ECO:0000313|EnsemblPlants:TRIAE_CS42_5DL_TGACv1_434941_AA1443980.2};
TRINITY_DN136_c0_g1_i6	tr|R7W7D9|R7W7D9_AEGTA	41	2.9e-06	63.2	4.8	ORFNames=F775_24075 {ECO:0000313|EMBL:EMT16893.1};	R7W7D9_AEGTA	Uncharacterized protein	SubName: Full=Uncharacterized protein {ECO:0000313|EMBL:EMT16893.1, ECO:0000313|EnsemblPlants:EMT16893};
TRINITY_DN136_c0_g1_i12	tr|A0A287N9U8|A0A287N9U8_HORVV	165	1.9e-31	147.5	12		A0A287N9U8_HORVV	Predicted protein	SubName: Full=Predicted protein {ECO:0000313|EnsemblPlants:HORVU4Hr1G013030.20};
TRINITY_DN136_c0_g1_i4	tr|A0A287N9U8|A0A287N9U8_HORVV	165	1.8e-31	147.5	12.5		A0A287N9U8_HORVV	Predicted protein	SubName: Full=Predicted protein {ECO:0000313|EnsemblPlants:HORVU4Hr1G013030.20};
TRINITY_DN136_c0_g1_i16	tr|A0A287N9U8|A0A287N9U8_HORVV	165	1.5e-31	147.5	14.8		A0A287N9U8_HORVV	Predicted protein	SubName: Full=Predicted protein {ECO:0000313|EnsemblPlants:HORVU4Hr1G013030.20};
TRINITY_DN136_c0_g1_i5	tr|R7W7D9|R7W7D9_AEGTA	41	2.8e-06	63.2	5	ORFNames=F775_24075 {ECO:0000313|EMBL:EMT16893.1};	R7W7D9_AEGTA	Uncharacterized protein	SubName: Full=Uncharacterized protein {ECO:0000313|EMBL:EMT16893.1, ECO:0000313|EnsemblPlants:EMT16893};
TRINITY_DN136_c0_g1_i18	tr|A0A287N9U8|A0A287N9U8_HORVV	165	1.8e-31	147.5	12.2		A0A287N9U8_HORVV	Predicted protein	SubName: Full=Predicted protein {ECO:0000313|EnsemblPlants:HORVU4Hr1G013030.20};
TRINITY_DN136_c0_g1_i28	tr|A0A287N9U8|A0A287N9U8_HORVV	165	1.8e-31	147.5	12.3		A0A287N9U8_HORVV	Predicted protein	SubName: Full=Predicted protein {ECO:0000313|EnsemblPlants:HORVU4Hr1G013030.20};
TRINITY_DN136_c0_g1_i17	tr|A0A287N9U8|A0A287N9U8_HORVV	165	1.5e-31	147.5	15.3		A0A287N9U8_HORVV	Predicted protein	SubName: Full=Predicted protein {ECO:0000313|EnsemblPlants:HORVU4Hr1G013030.20};
TRINITY_DN136_c0_g1_i20	tr|R7W7D9|R7W7D9_AEGTA	41	2.6e-06	63.2	5.2	ORFNames=F775_24075 {ECO:0000313|EMBL:EMT16893.1};	R7W7D9_AEGTA	Uncharacterized protein	SubName: Full=Uncharacterized protein {ECO:0000313|EMBL:EMT16893.1, ECO:0000313|EnsemblPlants:EMT16893};
TRINITY_DN136_c0_g1_i26	tr|A0A287N9U8|A0A287N9U8_HORVV	165	1.9e-31	147.5	12		A0A287N9U8_HORVV	Predicted protein	SubName: Full=Predicted protein {ECO:0000313|EnsemblPlants:HORVU4Hr1G013030.20};
TRINITY_DN136_c0_g1_i29	tr|R7W7D9|R7W7D9_AEGTA	41	2.8e-06	63.2	5	ORFNames=F775_24075 {ECO:0000313|EMBL:EMT16893.1};	R7W7D9_AEGTA	Uncharacterized protein	SubName: Full=Uncharacterized protein {ECO:0000313|EMBL:EMT16893.1, ECO:0000313|EnsemblPlants:EMT16893};
TRINITY_DN136_c0_g1_i2	tr|A0A287N9U8|A0A287N9U8_HORVV	165	1.5e-31	147.5	14.5		A0A287N9U8_HORVV	Predicted protein	SubName: Full=Predicted protein {ECO:0000313|EnsemblPlants:HORVU4Hr1G013030.20};
TRINITY_DN136_c0_g1_i8	tr|A0A287N9U8|A0A287N9U8_HORVV	165	1.9e-31	147.5	12		A0A287N9U8_HORVV	Predicted protein	SubName: Full=Predicted protein {ECO:0000313|EnsemblPlants:HORVU4Hr1G013030.20};
TRINITY_DN136_c0_g1_i23	tr|A0A287N9U8|A0A287N9U8_HORVV	165	1.8e-31	147.5	12.3		A0A287N9U8_HORVV	Predicted protein	SubName: Full=Predicted protein {ECO:0000313|EnsemblPlants:HORVU4Hr1G013030.20};
TRINITY_DN136_c0_g1_i3	tr|A0A287N9U8|A0A287N9U8_HORVV	165	1.8e-31	147.5	12.2		A0A287N9U8_HORVV	Predicted protein	SubName: Full=Predicted protein {ECO:0000313|EnsemblPlants:HORVU4Hr1G013030.20};
TRINITY_DN136_c0_g1_i22	tr|R7W7D9|R7W7D9_AEGTA	41	2.8e-06	63.2	4.9	ORFNames=F775_24075 {ECO:0000313|EMBL:EMT16893.1};	R7W7D9_AEGTA	Uncharacterized protein	SubName: Full=Uncharacterized protein {ECO:0000313|EMBL:EMT16893.1, ECO:0000313|EnsemblPlants:EMT16893};
TRINITY_DN136_c0_g1_i21	tr|A0A287N9U8|A0A287N9U8_HORVV	165	1.8e-31	147.5	12.2		A0A287N9U8_HORVV	Predicted protein	SubName: Full=Predicted protein {ECO:0000313|EnsemblPlants:HORVU4Hr1G013030.20};
TRINITY_DN136_c1_g1_i1	tr|A0A287IA44|A0A287IA44_HORVV	44	2.2e-05	57	48.4		A0A287IA44_HORVV	Uncharacterized protein	SubName: Full=Uncharacterized protein {ECO:0000313|EnsemblPlants:HORVU2Hr1G067290.13};
TRINITY_DN162_c0_g1_i4	tr|A0A1D5XGS8|A0A1D5XGS8_WHEAT	211	1.9e-113	417.9	58.8		A0A1D5XGS8_WHEAT	Uncharacterized protein	SubName: Full=Uncharacterized protein {ECO:0000313|EnsemblPlants:TRIAE_CS42_4BL_TGACv1_320472_AA1040630.1};
TRINITY_DN162_c0_g1_i2	tr|A0A1D5XB52|A0A1D5XB52_WHEAT	638	0	1144.4	67		A0A1D5XB52_WHEAT	Uncharacterized protein	SubName: Full=Uncharacterized protein {ECO:0000313|EnsemblPlants:TRIAE_CS42_4AS_TGACv1_306759_AA1012890.1};
TRINITY_DN162_c0_g1_i3	tr|A0A1D5Y091|A0A1D5Y091_WHEAT	638	0	1143.3	66.9		A0A1D5Y091_WHEAT	Uncharacterized protein	SubName: Full=Uncharacterized protein {ECO:0000313|EnsemblPlants:TRIAE_CS42_4DL_TGACv1_343466_AA1134890.6};
TRINITY_DN162_c0_g1_i1	tr|A0A1D5Y091|A0A1D5Y091_WHEAT	638	0	1143.3	66.9		A0A1D5Y091_WHEAT	Uncharacterized protein	SubName: Full=Uncharacterized protein {ECO:0000313|EnsemblPlants:TRIAE_CS42_4DL_TGACv1_343466_AA1134890.6};
TRINITY_DN127_c0_g1_i6	tr|A0A1D6BX59|A0A1D6BX59_WHEAT	301	7.2e-147	529.3	68.9		A0A1D6BX59_WHEAT	Uncharacterized protein	SubName: Full=Uncharacterized protein {ECO:0000313|EnsemblPlants:TRIAE_CS42_7AS_TGACv1_570200_AA1832090.1};
TRINITY_DN127_c0_g1_i4	tr|A0A1D6AL68|A0A1D6AL68_WHEAT	295	5.9e-160	572.4	84.4		A0A1D6AL68_WHEAT	Uncharacterized protein	SubName: Full=Uncharacterized protein {ECO:0000313|EnsemblPlants:TRIAE_CS42_6BL_TGACv1_499547_AA1585580.2};
TRINITY_DN127_c0_g1_i1	tr|A0A1D6BX59|A0A1D6BX59_WHEAT	301	1.1e-146	528.9	59.4		A0A1D6BX59_WHEAT	Uncharacterized protein	SubName: Full=Uncharacterized protein {ECO:0000313|EnsemblPlants:TRIAE_CS42_7AS_TGACv1_570200_AA1832090.1};
TRINITY_DN127_c0_g1_i5	tr|A0A1D6BX59|A0A1D6BX59_WHEAT	301	1.9e-148	534.3	80.1		A0A1D6BX59_WHEAT	Uncharacterized protein	SubName: Full=Uncharacterized protein {ECO:0000313|EnsemblPlants:TRIAE_CS42_7AS_TGACv1_570200_AA1832090.1};
TRINITY_DN127_c0_g1_i3	tr|A0A1D6AL68|A0A1D6AL68_WHEAT	295	1.5e-160	574.7	67.6		A0A1D6AL68_WHEAT	Uncharacterized protein	SubName: Full=Uncharacterized protein {ECO:0000313|EnsemblPlants:TRIAE_CS42_6BL_TGACv1_499547_AA1585580.2};
TRINITY_DN127_c1_g1_i1	tr|A0A1D6AL67|A0A1D6AL67_WHEAT	71	2.6e-30	139.4	99.5		A0A1D6AL67_WHEAT	Silicon transporter protein	SubName: Full=Silicon transporter protein {ECO:0000313|EnsemblPlants:TRIAE_CS42_6DL_TGACv1_528106_AA1711620.2};
TRINITY_DN155_c0_g1_i10	tr|A0A1D5SQ13|A0A1D5SQ13_WHEAT	562	2.1e-239	838.2	44.9		A0A1D5SQ13_WHEAT	Putative rRNA methyltransferase; 2'-O-ribose RNA methyltransferase SPB1 homolog	RecName: Full=Putative rRNA methyltransferase {ECO:0000256|HAMAP-Rule:MF_03163}; EC=2.1.1.- {ECO:0000256|HAMAP-Rule:MF_03163}; AltName: Full=2'-O-ribose RNA methyltransferase SPB1 homolog {ECO:0000256|HAMAP-Rule:MF_03163};
TRINITY_DN155_c0_g1_i3	tr|A0A1D5SQ13|A0A1D5SQ13_WHEAT	307	1.3e-130	474.9	89		A0A1D5SQ13_WHEAT	Putative rRNA methyltransferase; 2'-O-ribose RNA methyltransferase SPB1 homolog	RecName: Full=Putative rRNA methyltransferase {ECO:0000256|HAMAP-Rule:MF_03163}; EC=2.1.1.- {ECO:0000256|HAMAP-Rule:MF_03163}; AltName: Full=2'-O-ribose RNA methyltransferase SPB1 homolog {ECO:0000256|HAMAP-Rule:MF_03163};
TRINITY_DN155_c0_g1_i6	tr|A0A1D6ACY2|A0A1D6ACY2_WHEAT	540	0	1077.8	50.1		A0A1D6ACY2_WHEAT	Uncharacterized protein	SubName: Full=Uncharacterized protein {ECO:0000313|EnsemblPlants:TRIAE_CS42_6AL_TGACv1_474177_AA1534420.3};
TRINITY_DN155_c0_g1_i5	tr|A0A1D5SQ13|A0A1D5SQ13_WHEAT	561	2.9e-243	850.9	48.4		A0A1D5SQ13_WHEAT	Putative rRNA methyltransferase; 2'-O-ribose RNA methyltransferase SPB1 homolog	RecName: Full=Putative rRNA methyltransferase {ECO:0000256|HAMAP-Rule:MF_03163}; EC=2.1.1.- {ECO:0000256|HAMAP-Rule:MF_03163}; AltName: Full=2'-O-ribose RNA methyltransferase SPB1 homolog {ECO:0000256|HAMAP-Rule:MF_03163};
TRINITY_DN155_c0_g1_i1	tr|A0A1D5SQ13|A0A1D5SQ13_WHEAT	562	2.1e-239	838.2	44.9		A0A1D5SQ13_WHEAT	Putative rRNA methyltransferase; 2'-O-ribose RNA methyltransferase SPB1 homolog	RecName: Full=Putative rRNA methyltransferase {ECO:0000256|HAMAP-Rule:MF_03163}; EC=2.1.1.- {ECO:0000256|HAMAP-Rule:MF_03163}; AltName: Full=2'-O-ribose RNA methyltransferase SPB1 homolog {ECO:0000256|HAMAP-Rule:MF_03163};
TRINITY_DN155_c0_g1_i9	tr|A0A1D6ACY2|A0A1D6ACY2_WHEAT	619	0	1221.5	64.2		A0A1D6ACY2_WHEAT	Uncharacterized protein	SubName: Full=Uncharacterized protein {ECO:0000313|EnsemblPlants:TRIAE_CS42_6AL_TGACv1_474177_AA1534420.3};
[truncated: 187,819 more rows]
