# Supplementary material for: Insight into the mechanisms of terminal HS-tolerance in wheat mutant with improved nutritional quality through de novo transcriptome sequencing
Source: Research Square preprint supplement (doi:10.21203/rs.3.rs-241832/v1), 2021-02-26
Supplement: Supplementary file 12 [file b77a0658fe9f41643df81893.xlsx]

## Sheet: Upregulated_M3H_vs_P3
	Insight into the mechanisms of terminal HS-tolerance in wheat mutant with improved nutritional quality through de novo transcriptome sequencing Ranjeet R. Kumar, Suman Bakshi, Kavita Dubey, Sumedha Hasija, Gyanendra K. Rai, Neelu Jain, Sanjay Jambhulkar, Bhupinder Singh, Gyanendra P. Singh, & Shelly Praveen
	Table S8 List of differentially expressed transcripts (Upregulated) identified in wheat mutant exposed to heat stress (M3H) over parent (P3) through de novo transcriptomic sequencing using Illumina Hiseq 4000
	S. No.	logFC	PValue	FDR	DEGType	Trinity_GeneID	Wheat_Transcript_ID	Transcript_Start	Transcript_End	Transcript length	E value	Wheat_Gene_ID	Chromosome	Gene_Start	Gene_End	Description/Protein Name
	TRINITY_DN75467_c1_g1	16.2029	1.73e-62	1.53e-57	UP	TRINITY_DN75467_c1_g1	TraesCS3D01G045600.1	277	371	456	4.18e-43	TraesCS3D01G045600	chr3D	17406976	17407431	Heat shock protein
	TRINITY_DN21155_c0_g2	15.5748	1.63e-61	7.25e-57	UP	TRINITY_DN21155_c0_g2	TraesCS4A01G068200.1	423	259	717	3.11e-77	TraesCS4A01G068200	chr4A	66608871	66609979	Heat shock protein
	TRINITY_DN7556_c0_g1	9.89062	1.56e-59	4.62e-55	UP	TRINITY_DN7556_c0_g1	TraesCS5D01G269400.1	1	417	417	0	TraesCS5D01G269400	chr5D	372454297	372454713	Calcium-binding EF-hand family protein-like
	TRINITY_DN31360_c0_g1	13.2798	3.11e-58	6.9e-54	UP	TRINITY_DN31360_c0_g1	TraesCS3B01G390700.1	214	307	1959	3.29e-42	TraesCS3B01G390700	chr3B	615748962	615751502	70 kDa heat shock protein
	TRINITY_DN11203_c0_g1	14.6159	7.3e-54	8.1e-50	UP	TRINITY_DN11203_c0_g1	TraesCS3D01G273600.2	2231	2486	2688	9.27e-133	TraesCS3D01G273600	chr3D	379536248	379539614	Chaperone clpb, putative
	TRINITY_DN18998_c1_g2	10.2548	1.05e-53	1.04e-49	UP	NA	NA	NA	NA	NA	NA	NA	NA	NA	NA	NA
	TRINITY_DN13889_c0_g1	9.27741	5.2e-52	4.61e-48	UP	TRINITY_DN13889_c0_g1	TraesCSU01G131300.1	2468	2589	2916	3.6e-58	TraesCSU01G131300	chrUn	110792543	110798430	ATP-dependent chaperone ClpB
	TRINITY_DN35080_c0_g1	9.36874	6.93e-52	5.59e-48	UP	TRINITY_DN35080_c0_g1	TraesCS5A01G548000.3	2556	3308	3933	0	TraesCS5A01G548000	chr5A	702165549	702169903	BAG family molecular chaperone regulator 6
	TRINITY_DN16896_c0_g1	11.1726	6.22e-51	4.6e-47	UP	TRINITY_DN16896_c0_g1	TraesCS2B01G294500.1	586	636	1764	1.32e-18	TraesCS2B01G294500	chr2B	411140591	411143398	Peptidylprolyl isomerase
	TRINITY_DN21155_c0_g1	15.4041	1.25e-50	8.56e-47	UP	TRINITY_DN21155_c0_g1	TraesCS4B01G225400.1	265	442	732	2.65e-89	TraesCS4B01G225400	chr4B	471956428	471957605	Heat shock protein
	TRINITY_DN1551_c0_g1	7.87284	3.29e-49	1.95e-45	UP	TRINITY_DN1551_c0_g1	TraesCS6B01G456600.1	1	1215	1215	0	TraesCS6B01G456600	chr6B	712674678	712676160	BAG family molecular chaperone regulator 5
	TRINITY_DN2534_c1_g2	9.99089	2e-48	9.85e-45	UP	NA	NA	NA	NA	NA	NA	NA	NA	NA	NA	NA
	TRINITY_DN8393_c7_g1	17.4165	4.84e-48	2.26e-44	UP	TRINITY_DN8393_c7_g1	TraesCS5B01G245700.1	192	423	465	1.82e-119	TraesCS5B01G245700	chr5B	426651504	426651968	Heat shock protein
	TRINITY_DN36949_c0_g1	7.98061	6.57e-48	2.91e-44	UP	TRINITY_DN36949_c0_g1	TraesCS4D01G212300.1	371	474	474	3.17e-46	TraesCS4D01G212300	chr4D	365217434	365218278	Heat shock protein
	TRINITY_DN2070_c0_g1	10.3285	8.35e-48	3.53e-44	UP	NA	NA	NA	NA	NA	NA	NA	NA	NA	NA	NA
	TRINITY_DN133181_c5_g1	8.73517	3.75e-47	1.51e-43	UP	TRINITY_DN133181_c5_g1	TraesCS5D01G393200.1	1134	946	1134	4.23e-82	TraesCS5D01G393200	chr5D	461439693	461440998	Heat shock transcription factor
	TRINITY_DN1603_c0_g2	7.46236	4.93e-47	1.9e-43	UP	NA	NA	NA	NA	NA	NA	NA	NA	NA	NA	NA
	TRINITY_DN7672_c0_g1	8.22773	7.04e-47	2.6e-43	UP	TRINITY_DN7672_c0_g1	TraesCS1A01G395300.1	605	681	1119	1.39e-32	TraesCS1A01G395300	chr1A	560960168	560962700	Chaperone protein dnaJ
	TRINITY_DN25343_c0_g1	15.413	7.66e-47	2.72e-43	UP	TRINITY_DN25343_c0_g1	TraesCS3A01G274400.1	1278	1343	2742	3.52e-27	TraesCS3A01G274400	chr3A	503751786	503755145	Chaperone clpb, putative
	TRINITY_DN219201_c0_g1	13.5241	6.56e-46	1.94e-42	UP	TRINITY_DN219201_c0_g1	TraesCS3B01G233100.1	591	855	1797	1.62e-120	TraesCS3B01G233100	chr3B	360009741	360011537	RNA-directed DNA polymerase (Reverse transcriptase)
	TRINITY_DN18979_c0_g1	16.763	1.01e-45	2.9e-42	UP	TRINITY_DN18979_c0_g1	TraesCS7A01G040400.1	444	720	843	2.16e-139	TraesCS7A01G040400	chr7A	18738412	18739728	Acid phosphatase 1
	TRINITY_DN15817_c0_g2	13.2294	1.96e-45	5.44e-42	UP	TRINITY_DN15817_c0_g2	TraesCS5A01G542400.1	778	993	1137	1.32e-110	TraesCS5A01G542400	chr5A	698498269	698501511	Alcohol dehydrogenase
	TRINITY_DN1068_c0_g1	8.14168	3.58e-45	9.63e-42	UP	NA	NA	NA	NA	NA	NA	NA	NA	NA	NA	NA
	TRINITY_DN6473_c0_g1	7.67387	4.64e-45	1.21e-41	UP	TRINITY_DN6473_c0_g1	TraesCS3D01G273600.1	1541	1921	2742	0	TraesCS3D01G273600	chr3D	379536248	379539614	Chaperone clpb, putative
	TRINITY_DN6476_c0_g1	7.87789	8.29e-45	1.99e-41	UP	TRINITY_DN6476_c0_g1	TraesCS3D01G114800.1	1	489	489	0	TraesCS3D01G114800	chr3D	68273803	68274291	Heat-shock protein, putative
	TRINITY_DN6332_c1_g3	14.3753	8.65e-45	2.02e-41	UP	TRINITY_DN6332_c1_g3	TraesCS2A01G531800.1	253	1	267	1.57e-87	TraesCS2A01G531800	chr2A	748558310	748558576	Wound-responsive family protein
	TRINITY_DN17739_c0_g1	13.7951	1.14e-44	2.49e-41	UP	TRINITY_DN17739_c0_g1	TraesCS2B01G294500.1	875	937	1764	1.52e-25	TraesCS2B01G294500	chr2B	411140591	411143398	Peptidylprolyl isomerase
	TRINITY_DN14821_c0_g1	8.15841	1.15e-44	2.49e-41	UP	TRINITY_DN14821_c0_g1	TraesCS2D01G276000.1	1269	1367	1653	1.77e-45	TraesCS2D01G276000	chr2D	345623985	345626820	Peptidylprolyl isomerase
	TRINITY_DN29785_c3_g1	10.7286	4.2e-44	8.66e-41	UP	TRINITY_DN29785_c3_g1	TraesCS5B01G182900.6	3901	3950	3951	1.66e-11	TraesCS5B01G182900	chr5B	332950032	332967912	Disease resistance protein (NBS-LRR class) family
	TRINITY_DN28505_c0_g3	13.4303	6.08e-44	1.2e-40	UP	NA	NA	NA	NA	NA	NA	NA	NA	NA	NA	NA
	TRINITY_DN22791_c0_g3	10.205	1.4e-43	2.69e-40	UP	NA	NA	NA	NA	NA	NA	NA	NA	NA	NA	NA
	TRINITY_DN15566_c0_g1	13.1156	2.4e-43	4.54e-40	UP	TRINITY_DN15566_c0_g1	TraesCS4B01G380800.1	1407	1474	2928	2.97e-28	TraesCS4B01G380800	chr4B	660723123	660728928	ATP-dependent chaperone ClpB
	TRINITY_DN22892_c1_g1	9.92869	4.01e-43	7.4e-40	UP	TRINITY_DN22892_c1_g1	TraesCS7B01G388700.3	2681	2914	3954	1.42e-120	TraesCS7B01G388700	chr7B	654949049	654953437	BAG family molecular chaperone regulator 6
	TRINITY_DN77260_c0_g1	14.6231	4.09e-43	7.4e-40	UP	TRINITY_DN77260_c0_g1	TraesCS4B01G225400.1	485	692	732	3.57e-101	TraesCS4B01G225400	chr4B	471956428	471957605	Heat shock protein
	TRINITY_DN14624_c0_g1	8.06728	8.87e-43	1.57e-39	UP	NA	NA	NA	NA	NA	NA	NA	NA	NA	NA	NA
	TRINITY_DN93662_c2_g1	9.3657	1.21e-42	2.11e-39	UP	TRINITY_DN93662_c2_g1	TraesCS5A01G548000.2	3726	3936	3936	3.28e-107	TraesCS5A01G548000	chr5A	702165549	702169903	BAG family molecular chaperone regulator 6
	TRINITY_DN14477_c0_g1	12.9626	2.32e-42	3.81e-39	UP	TRINITY_DN14477_c0_g1	TraesCS4B01G243400.1	1	82	1743	4.93e-36	TraesCS4B01G243400	chr4B	504934572	504936314	Heat shock 70 kDa protein
	TRINITY_DN19686_c1_g1	8.40023	7.15e-42	1.13e-38	UP	NA	NA	NA	NA	NA	NA	NA	NA	NA	NA	NA
	TRINITY_DN11388_c0_g1	10.0845	7.74e-42	1.2e-38	UP	NA	NA	NA	NA	NA	NA	NA	NA	NA	NA	NA
	TRINITY_DN77529_c0_g1	6.98352	1.32e-41	2.01e-38	UP	TRINITY_DN77529_c0_g1	TraesCS3D01G091700.1	744	495	894	4.29e-116	TraesCS3D01G091700	chr3D	46470900	46471988	LOB domain-containing protein
	TRINITY_DN22791_c0_g1	14.4827	1.41e-41	2.13e-38	UP	NA	NA	NA	NA	NA	NA	NA	NA	NA	NA	NA
	TRINITY_DN9325_c0_g1	7.30715	1.97e-41	2.91e-38	UP	TRINITY_DN9325_c0_g1	TraesCS1A01G340100.1	1964	2075	2757	1.29e-52	TraesCS1A01G340100	chr1A	530257362	530260422	ATP-dependent chaperone ClpB
	TRINITY_DN23156_c0_g1	11.7516	4.16e-41	6.05e-38	UP	NA	NA	NA	NA	NA	NA	NA	NA	NA	NA	NA
	TRINITY_DN36949_c0_g2	13.6274	4.74e-41	6.78e-38	UP	TRINITY_DN36949_c0_g2	TraesCS2A01G524600.1	1	582	582	2.95e-165	TraesCS2A01G524600	chr2A	745388709	745389290	Ethylene-responsive transcription factor, putative
	TRINITY_DN126_c0_g3	12.7377	6.74e-41	9.49e-38	UP	TRINITY_DN126_c0_g3	TraesCS2A01G485700.2	1	61	2250	1.16e-17	TraesCS2A01G485700	chr2A	721104305	721107040	Serine/threonine-protein kinase
	TRINITY_DN16236_c0_g1	12.8733	7.1e-41	9.84e-38	UP	TRINITY_DN16236_c0_g1	TraesCS2A01G058100.1	193	1	924	3.81e-96	TraesCS2A01G058100	chr2A	24363959	24364882	Acidic chitinase
	TRINITY_DN70221_c0_g2	6.58742	9.48e-41	1.27e-37	UP	TRINITY_DN70221_c0_g2	TraesCS6A01G410800.1	1	209	1215	1.58e-96	TraesCS6A01G410800	chr6A	613771831	613774318	BAG family molecular chaperone regulator 5
	TRINITY_DN9498_c0_g1	6.65281	1.17e-40	1.54e-37	UP	TRINITY_DN9498_c0_g1	TraesCS1D01G342100.1	1964	2054	2757	5.81e-41	TraesCS1D01G342100	chr1D	431826446	431829513	ATP-dependent chaperone ClpB
	TRINITY_DN29182_c0_g1	7.6754	2.45e-40	3.06e-37	UP	NA	NA	NA	NA	NA	NA	NA	NA	NA	NA	NA
	TRINITY_DN50223_c1_g1	12.669	3.54e-40	4.36e-37	UP	TRINITY_DN50223_c1_g1	TraesCS2A01G248600.1	364	160	597	3.51e-101	TraesCS2A01G248600	chr2A	372371269	372371865	Cytidylate kinase
	TRINITY_DN6497_c0_g1	13.23	5.53e-40	6.73e-37	UP	NA	NA	NA	NA	NA	NA	NA	NA	NA	NA	NA
	TRINITY_DN26392_c0_g2	7.43143	6.75e-40	8.09e-37	UP	TRINITY_DN26392_c0_g2	TraesCS4B01G211600.1	156	474	474	2.47e-151	TraesCS4B01G211600	chr4B	449928126	449929253	Heat-shock protein
	TRINITY_DN119081_c0_g1	8.78004	7.12e-40	8.42e-37	UP	TRINITY_DN119081_c0_g1	TraesCS2B01G272900.1	518	697	786	9.78e-89	TraesCS2B01G272900	chr2B	374207787	374209500	Photosystem II 10 kDa polypeptide family protein
	TRINITY_DN25334_c0_g1	7.3828	7.81e-40	9.11e-37	UP	TRINITY_DN25334_c0_g1	TraesCS3A01G274500.1	1284	1159	1284	2.73e-48	TraesCS3A01G274500	chr3A	503753941	503755224	syntaxin of plants 73
	TRINITY_DN235111_c0_g1	12.9045	1.34e-39	1.55e-36	UP	NA	NA	NA	NA	NA	NA	NA	NA	NA	NA	NA
	TRINITY_DN14877_c0_g1	7.39809	2.85e-39	3.24e-36	UP	TRINITY_DN14877_c0_g1	TraesCS1B01G454200.1	1168	1206	1206	5.09e-11	TraesCS1B01G454200	chr1B	670142456	670143972	Glucan endo-1,3-beta-glucosidase 3
	TRINITY_DN6476_c1_g2	12.6266	2.9e-39	3.26e-36	UP	NA	NA	NA	NA	NA	NA	NA	NA	NA	NA	NA
	TRINITY_DN17149_c0_g2	14.9572	3.18e-39	3.53e-36	UP	NA	NA	NA	NA	NA	NA	NA	NA	NA	NA	NA
	TRINITY_DN16806_c0_g1	8.45333	4.58e-39	4.96e-36	UP	TRINITY_DN16806_c0_g1	TraesCS7D01G440200.1	143	237	885	5.66e-41	TraesCS7D01G440200	chr7D	560248214	560250603	Phosphosulfolactate synthase-related protein
	TRINITY_DN51115_c0_g1	6.92167	6.47e-39	6.8e-36	UP	TRINITY_DN51115_c0_g1	TraesCS1B01G352400.1	1351	1563	2754	2.81e-107	TraesCS1B01G352400	chr1B	583207824	583210883	ATP-dependent chaperone ClpB
	TRINITY_DN30292_c0_g1	13.4145	6.52e-39	6.8e-36	UP	NA	NA	NA	NA	NA	NA	NA	NA	NA	NA	NA
	TRINITY_DN18616_c0_g1	7.41524	1.05e-38	1.06e-35	UP	TRINITY_DN18616_c0_g1	TraesCS3A01G274400.1	2029	2303	2742	2.75e-143	TraesCS3A01G274400	chr3A	503751786	503755145	Chaperone clpb, putative
	TRINITY_DN6288_c0_g1	6.62712	1.13e-38	1.13e-35	UP	TRINITY_DN6288_c0_g1	TraesCS1D01G131800.1	1190	1254	2049	1.08e-26	TraesCS1D01G131800	chr1D	155728817	155734791	Chaperone DnaK
	TRINITY_DN16619_c4_g1	10.3617	1.38e-38	1.36e-35	UP	TRINITY_DN16619_c4_g1	TraesCS7B01G479200.1	1	845	4113	1.17e-167	TraesCS7B01G479200	chr7B	733811146	733815258	NBS-LRR disease resistance protein-like protein
	TRINITY_DN1220_c0_g1	6.76428	1.68e-38	1.64e-35	UP	TRINITY_DN1220_c0_g1	TraesCS3A01G274500.1	136	15	1284	6.95e-50	TraesCS3A01G274500	chr3A	503753941	503755224	syntaxin of plants 73
	TRINITY_DN50728_c0_g1	8.04816	1.87e-38	1.81e-35	UP	TRINITY_DN50728_c0_g1	TraesCS4B01G380800.1	949	1020	2928	2.09e-30	TraesCS4B01G380800	chr4B	660723123	660728928	ATP-dependent chaperone ClpB
	TRINITY_DN414_c0_g1	7.42098	1.97e-38	1.88e-35	UP	TRINITY_DN414_c0_g1	TraesCS6D01G322300.1	419	540	540	1.57e-53	TraesCS6D01G322300	chr6D	429383365	429383997	Heat-shock protein, putative
	TRINITY_DN426_c0_g1	7.80521	2.4e-38	2.26e-35	UP	TRINITY_DN426_c0_g1	TraesCS5A01G548000.1	8	2251	2523	0	TraesCS5A01G548000	chr5A	702165549	702169903	BAG family molecular chaperone regulator 6
	TRINITY_DN14165_c0_g1	7.99295	3.19e-38	2.98e-35	UP	TRINITY_DN14165_c0_g1	TraesCS4D01G206600.1	737	1239	1974	0	TraesCS4D01G206600	chr4D	354136050	354138155	70 kDa heat shock protein
	TRINITY_DN7594_c0_g1	12.4255	4.58e-38	4.23e-35	UP	NA	NA	NA	NA	NA	NA	NA	NA	NA	NA	NA
	TRINITY_DN426_c0_g2	12.5458	4.71e-38	4.31e-35	UP	TRINITY_DN426_c0_g2	TraesCS7D01G543700.1	1559	1650	1650	9.18e-40	TraesCS7D01G543700	chr7D	631998137	632001532	Signal peptide peptidase-like protein
	TRINITY_DN437_c5_g1	12.6334	4.88e-38	4.42e-35	UP	TRINITY_DN437_c5_g1	TraesCS6B01G367800.1	810	1080	1944	1.51e-63	TraesCS6B01G367800	chr6B	641409252	641412893	70 kDa heat shock protein
	TRINITY_DN36713_c0_g1	13.0457	5.26e-38	4.71e-35	UP	TRINITY_DN36713_c0_g1	TraesCS7D01G507600.1	2054	2328	2328	3.5e-143	TraesCS7D01G507600	chr7D	611719067	611723410	Pyrophosphate-energized vacuolar membrane proton pump
	TRINITY_DN84051_c0_g1	7.25322	5.55e-38	4.92e-35	UP	TRINITY_DN84051_c0_g1	TraesCS3A01G113000.1	432	489	489	1.48e-22	TraesCS3A01G113000	chr3A	80288788	80289478	Heat-shock protein, putative
	TRINITY_DN301_c0_g1	11.9299	7.05e-38	6.19e-35	UP	TRINITY_DN301_c0_g1	TraesCS7B01G267300.1	322	1062	1062	0	TraesCS7B01G267300	chr7B	490432075	490433223	Heat shock transcription factor
	TRINITY_DN20098_c0_g1	7.82882	7.35e-38	6.39e-35	UP	TRINITY_DN20098_c0_g1	TraesCS3D01G273600.2	2434	2688	2688	2.99e-130	TraesCS3D01G273600	chr3D	379536248	379539614	Chaperone clpb, putative
	TRINITY_DN17144_c0_g1	10.6342	9.88e-38	8.51e-35	UP	TRINITY_DN17144_c0_g1	TraesCS1A01G440000.1	1	594	594	0	TraesCS1A01G440000	chr1A	589113474	589114067	GH3.3
	TRINITY_DN19637_c0_g1	8.5406	1.14e-37	9.73e-35	UP	NA	NA	NA	NA	NA	NA	NA	NA	NA	NA	NA
	TRINITY_DN17157_c0_g1	8.11962	1.44e-37	1.21e-34	UP	TRINITY_DN17157_c0_g1	TraesCS2B01G404400.1	1065	1184	1731	4.16e-57	TraesCS2B01G404400	chr2B	572554778	572557919	Hsp70-Hsp90 organizing protein 1
	TRINITY_DN24441_c0_g2	9.57306	1.64e-37	1.37e-34	UP	TRINITY_DN24441_c0_g2	TraesCS7B01G354100.1	123	228	918	8.54e-41	TraesCS7B01G354100	chr7B	611961698	611962747	Polyubiquitin
	TRINITY_DN10371_c0_g1	9.5792	1.84e-37	1.53e-34	UP	TRINITY_DN10371_c0_g1	TraesCS5A01G384100.1	271	416	750	8.33e-70	TraesCS5A01G384100	chr5A	581926267	581927150	Bax inhibitor-1 family protein
	TRINITY_DN43367_c0_g1	8.31997	2.72e-37	2.22e-34	UP	TRINITY_DN43367_c0_g1	TraesCS3D01G046300.1	20	254	456	1.86e-114	TraesCS3D01G046300	chr3D	17556434	17557122	Heat shock protein
	TRINITY_DN14388_c0_g1	8.1489	2.9e-37	2.34e-34	UP	TRINITY_DN14388_c0_g1	TraesCS4B01G106400.1	754	1093	1131	2.08e-172	TraesCS4B01G106400	chr4B	115845572	115848000	Alcohol dehydrogenase
	TRINITY_DN1832_c0_g1	5.92546	3.82e-37	3.05e-34	UP	TRINITY_DN1832_c0_g1	TraesCS2D01G533800.1	1	166	267	1.18e-82	TraesCS2D01G533800	chr2D	618060727	618060993	Wound-responsive family protein
	TRINITY_DN68271_c0_g2	12.6949	3.86e-37	3.06e-34	UP	TRINITY_DN68271_c0_g2	TraesCS4B01G398400.1	2118	1994	2118	1.34e-45	TraesCS4B01G398400	chr4B	672296565	672305318	Kinase
	TRINITY_DN1711_c0_g1	9.44368	4.78e-37	3.75e-34	UP	TRINITY_DN1711_c0_g1	TraesCS4A01G092700.1	1	115	468	1.44e-52	TraesCS4A01G092700	chr4A	100102028	100102737	Heat-shock protein
	TRINITY_DN17220_c0_g1	12.7857	6.91e-37	5.33e-34	UP	NA	NA	NA	NA	NA	NA	NA	NA	NA	NA	NA
	TRINITY_DN15612_c1_g1	10.5446	7.16e-37	5.48e-34	UP	TRINITY_DN15612_c1_g1	TraesCS2B01G047400.1	1	76	2139	1.11e-30	TraesCS2B01G047400	chr2B	23580771	23583241	Heat shock protein 90
	TRINITY_DN2397_c0_g1	6.12153	8.06e-37	6.11e-34	UP	TRINITY_DN2397_c0_g1	TraesCS1D01G284000.1	211	283	1845	2.49e-30	TraesCS1D01G284000	chr1D	382234639	382237640	70 kDa heat shock protein
	TRINITY_DN31617_c0_g2	7.36901	8.95e-37	6.73e-34	UP	TRINITY_DN31617_c0_g2	TraesCS5D01G434100.1	464	531	1266	2.52e-28	TraesCS5D01G434100	chr5D	489774687	489777095	Chaperone protein dnaJ, putative
	TRINITY_DN12984_c1_g4	12.7239	1.13e-36	8.35e-34	UP	TRINITY_DN12984_c1_g4	TraesCS2D01G533800.1	205	267	267	2e-25	TraesCS2D01G533800	chr2D	618060727	618060993	Wound-responsive family protein
	TRINITY_DN67836_c0_g2	6.81819	1.73e-36	1.22e-33	UP	TRINITY_DN67836_c0_g2	TraesCS2B01G294500.1	1602	1764	1764	6.47e-81	TraesCS2B01G294500	chr2B	411140591	411143398	Peptidylprolyl isomerase
	TRINITY_DN12478_c0_g1	12.4194	1.73e-36	1.22e-33	UP	TRINITY_DN12478_c0_g1	TraesCSU01G131300.1	446	543	2916	7.66e-45	TraesCSU01G131300	chrUn	110792543	110798430	ATP-dependent chaperone ClpB
	TRINITY_DN17108_c0_g1	11.4818	1.73e-36	1.22e-33	UP	NA	NA	NA	NA	NA	NA	NA	NA	NA	NA	NA
	TRINITY_DN18757_c0_g1	9.93747	2.05e-36	1.44e-33	UP	TRINITY_DN18757_c0_g1	TraesCS5A01G547300.1	2253	2505	2925	4.26e-131	TraesCS5A01G547300	chr5A	701070086	701075789	ATP-dependent chaperone ClpB
	TRINITY_DN1603_c2_g1	10.9288	2.33e-36	1.61e-33	UP	TRINITY_DN1603_c2_g1	TraesCS3D01G045800.1	396	459	459	4.23e-17	TraesCS3D01G045800	chr3D	17433235	17433693	Heat shock protein
	TRINITY_DN68088_c0_g1	12.2605	2.48e-36	1.7e-33	UP	TRINITY_DN68088_c0_g1	TraesCS7D01G365600.1	997	1235	2085	2.47e-108	TraesCS7D01G365600	chr7D	472287842	472294012	Poly(A) polymerase
	TRINITY_DN20082_c0_g1	10.0141	2.51e-36	1.72e-33	UP	TRINITY_DN20082_c0_g1	TraesCS7A01G374400.1	1085	1153	1188	3.95e-19	TraesCS7A01G374400	chr7A	547142812	547146424	Protein Ycf2
	TRINITY_DN12330_c0_g2	8.91321	2.85e-36	1.93e-33	UP	TRINITY_DN12330_c0_g2	TraesCS2D01G033200.1	391	1211	2133	0	TraesCS2D01G033200	chr2D	12882738	12885228	Heat shock protein 90
	TRINITY_DN6554_c0_g2	8.10754	5.62e-36	3.75e-33	UP	TRINITY_DN6554_c0_g2	TraesCSU01G047300.1	1	393	621	6.86e-142	TraesCSU01G047300	chrUn	37338311	37338931	Heat shock protein
	TRINITY_DN13481_c0_g2	7.07033	9.33e-36	6.13e-33	UP	TRINITY_DN13481_c0_g2	TraesCS5D01G320800.1	1	121	597	2.11e-57	TraesCS5D01G320800	chr5D	412960326	412961366	Ethylene-responsive transcription factor
	TRINITY_DN7369_c0_g1	12.2182	1.12e-35	7.23e-33	UP	NA	NA	NA	NA	NA	NA	NA	NA	NA	NA	NA
	TRINITY_DN26538_c1_g1	11.3526	1.13e-35	7.23e-33	UP	NA	NA	NA	NA	NA	NA	NA	NA	NA	NA	NA
	TRINITY_DN24737_c0_g1	7.70015	2.13e-35	1.35e-32	UP	TRINITY_DN24737_c0_g1	TraesCS3A01G274400.1	239	687	2742	0	TraesCS3A01G274400	chr3A	503751786	503755145	Chaperone clpb, putative
	TRINITY_DN126_c0_g1	8.07299	2.16e-35	1.36e-32	UP	TRINITY_DN126_c0_g1	TraesCS4D01G213100.1	346	474	474	8.61e-60	TraesCS4D01G213100	chr4D	365864520	365864993	Heat-shock protein, putative
	TRINITY_DN26381_c0_g2	12.2394	2.44e-35	1.5e-32	UP	TRINITY_DN26381_c0_g2	TraesCS4A01G328600.1	490	358	1257	1.7e-64	TraesCS4A01G328600	chr4A	614106743	614108525	Ankyrin repeat domain protein, putative
	TRINITY_DN76973_c0_g1	9.00438	3.23e-35	1.98e-32	UP	TRINITY_DN76973_c0_g1	TraesCS6B01G187500.1	123	197	1128	2.13e-31	TraesCS6B01G187500	chr6B	214025798	214028666	Phosphoglycerate kinase
	TRINITY_DN17860_c0_g1	13.3288	3.44e-35	2.08e-32	UP	NA	NA	NA	NA	NA	NA	NA	NA	NA	NA	NA
	TRINITY_DN49775_c0_g1	5.71368	3.45e-35	2.08e-32	UP	TRINITY_DN49775_c0_g1	TraesCS6D01G055400.1	387	588	627	3.47e-96	TraesCS6D01G055400	chr6D	26254788	26256391	60S ribosomal protein L13
	TRINITY_DN5934_c0_g1	6.95719	3.77e-35	2.26e-32	UP	TRINITY_DN5934_c0_g1	TraesCS3D01G114900.1	404	489	489	2.75e-37	TraesCS3D01G114900	chr3D	68325091	68325579	Heat-shock protein, putative
	TRINITY_DN7472_c0_g1	13.258	4.6e-35	2.72e-32	UP	NA	NA	NA	NA	NA	NA	NA	NA	NA	NA	NA
	TRINITY_DN3422_c1_g3	12.2944	5.44e-35	3.2e-32	UP	NA	NA	NA	NA	NA	NA	NA	NA	NA	NA	NA
	TRINITY_DN14497_c0_g1	12.837	8.09e-35	4.72e-32	UP	TRINITY_DN14497_c0_g1	TraesCS4B01G380800.1	637	697	2928	3.34e-24	TraesCS4B01G380800	chr4B	660723123	660728928	ATP-dependent chaperone ClpB
	TRINITY_DN42770_c0_g2	12.1431	9.32e-35	5.4e-32	UP	NA	NA	NA	NA	NA	NA	NA	NA	NA	NA	NA
	TRINITY_DN15362_c0_g1	6.98145	1.12e-34	6.46e-32	UP	TRINITY_DN15362_c0_g1	TraesCS7D01G068800.1	803	845	1002	3.49e-14	TraesCS7D01G068800	chr7D	39514541	39517436	Myeloid leukemia factor 1
	TRINITY_DN414_c0_g2	5.82893	1.61e-34	9.17e-32	UP	TRINITY_DN414_c0_g2	TraesCS6D01G322300.1	419	540	540	8.65e-54	TraesCS6D01G322300	chr6D	429383365	429383997	Heat-shock protein, putative
	TRINITY_DN437_c2_g1	9.67004	1.66e-34	9.36e-32	UP	TRINITY_DN437_c2_g1	TraesCS5D01G093900.1	263	335	1944	8.88e-22	TraesCS5D01G093900	chr5D	103213394	103216909	70 kDa heat shock protein
	TRINITY_DN334_c0_g2	8.25387	1.84e-34	1.03e-31	UP	TRINITY_DN334_c0_g2	TraesCS4D01G012500.1	262	91	321	7.32e-85	TraesCS4D01G012500	chr4D	5784698	5785018	Dehydrin family protein, expressed
	TRINITY_DN8340_c1_g2	8.91022	1.99e-34	1.11e-31	UP	TRINITY_DN8340_c1_g2	TraesCS3B01G406100.1	293	465	465	2.53e-86	TraesCS3B01G406100	chr3B	641666585	641667049	Ferredoxin
	TRINITY_DN7140_c0_g1	12.1091	2.07e-34	1.15e-31	UP	NA	NA	NA	NA	NA	NA	NA	NA	NA	NA	NA
	TRINITY_DN14168_c1_g1	6.83758	2.42e-34	1.34e-31	UP	TRINITY_DN14168_c1_g1	TraesCS4D01G212300.1	1	61	474	3.18e-24	TraesCS4D01G212300	chr4D	365217434	365218278	Heat shock protein
	TRINITY_DN13694_c0_g1	7.19968	2.54e-34	1.39e-31	UP	TRINITY_DN13694_c0_g1	TraesCS3B01G390700.1	707	912	1959	2.13e-103	TraesCS3B01G390700	chr3B	615748962	615751502	70 kDa heat shock protein
	TRINITY_DN22892_c0_g3	6.5581	2.71e-34	1.48e-31	UP	TRINITY_DN22892_c0_g3	TraesCS4D01G357900.1	2080	2263	3855	1.34e-92	TraesCS4D01G357900	chr4D	505999122	506003500	BAG family molecular chaperone regulator 6
	TRINITY_DN1716_c0_g1	9.01673	2.86e-34	1.55e-31	UP	NA	NA	NA	NA	NA	NA	NA	NA	NA	NA	NA
	TRINITY_DN19038_c0_g1	9.43948	3.41e-34	1.83e-31	UP	TRINITY_DN19038_c0_g1	TraesCS3D01G046700.1	319	456	456	2.85e-60	TraesCS3D01G046700	chr3D	17591725	17592180	Heat shock protein
	TRINITY_DN13076_c0_g1	12.8863	3.54e-34	1.89e-31	UP	NA	NA	NA	NA	NA	NA	NA	NA	NA	NA	NA
	TRINITY_DN190070_c0_g1	12.0753	3.83e-34	2.03e-31	UP	TRINITY_DN190070_c0_g1	TraesCS2D01G525700.1	877	972	972	1.32e-43	TraesCS2D01G525700	chr2D	613445836	613447986	translation initiation factor 3 subunit I
	TRINITY_DN8393_c5_g1	12.7107	4.01e-34	2.12e-31	UP	TRINITY_DN8393_c5_g1	TraesCS4A01G092100.1	281	355	477	2.69e-25	TraesCS4A01G092100	chr4A	98785516	98785992	Heat-shock protein, putative
	TRINITY_DN18193_c1_g1	12.1619	4.84e-34	2.54e-31	UP	TRINITY_DN18193_c1_g1	TraesCS2D01G508800.1	1640	1438	2010	2.07e-103	TraesCS2D01G508800	chr2D	601596482	601601810	Sulfate transporter
	TRINITY_DN9798_c0_g1	10.7387	6.24e-34	3.25e-31	UP	NA	NA	NA	NA	NA	NA	NA	NA	NA	NA	NA
	TRINITY_DN59654_c0_g2	9.28096	6.79e-34	3.52e-31	UP	TRINITY_DN59654_c0_g2	TraesCS7D01G190700.2	323	445	957	3.15e-57	TraesCS7D01G190700	chr7D	146104669	146106776	Nuclear migration protein nudC
	TRINITY_DN26392_c1_g1	6.50377	1.9e-33	9.6e-31	UP	TRINITY_DN26392_c1_g1	TraesCS4B01G212200.1	382	474	474	2.99e-37	TraesCS4B01G212200	chr4B	450482702	450483365	Heat-shock protein, putative
	TRINITY_DN15705_c0_g1	8.3165	2.1e-33	1.05e-30	UP	TRINITY_DN15705_c0_g1	TraesCS6A01G042600.1	1180	1255	1998	9.71e-33	TraesCS6A01G042600	chr6A	22442891	22446356	Heat shock 70 kDa protein
	TRINITY_DN509_c0_g1	11.0681	3.3e-33	1.64e-30	UP	TRINITY_DN509_c0_g1	TraesCSU01G131300.1	1015	1087	2916	9.5e-26	TraesCSU01G131300	chrUn	110792543	110798430	ATP-dependent chaperone ClpB
	TRINITY_DN15384_c0_g1	6.29581	4.88e-33	2.42e-30	UP	TRINITY_DN15384_c0_g1	TraesCS2D01G534200.1	9	273	273	5.18e-101	TraesCS2D01G534200	chr2D	618132569	618132841	Wound-responsive family protein
	TRINITY_DN11519_c0_g1	7.21239	5.29e-33	2.61e-30	UP	TRINITY_DN11519_c0_g1	TraesCS3B01G130300.1	205	489	489	8.97e-139	TraesCS3B01G130300	chr3B	112464964	112465703	Heat shock protein
	TRINITY_DN34384_c0_g1	12.8157	7.42e-33	3.61e-30	UP	TRINITY_DN34384_c0_g1	TraesCS4D01G292100.1	376	429	600	2.61e-10	TraesCS4D01G292100	chr4D	463401506	463402105	Membrane lipoprotein, putative
	TRINITY_DN14061_c0_g1	7.39296	7.81e-33	3.79e-30	UP	TRINITY_DN14061_c0_g1	TraesCS2A01G033700.1	278	567	2124	1.71e-144	TraesCS2A01G033700	chr2A	15001869	15004471	Heat shock protein 90
	TRINITY_DN30854_c0_g2	12.6149	9.23e-33	4.45e-30	UP	NA	NA	NA	NA	NA	NA	NA	NA	NA	NA	NA
	TRINITY_DN1603_c1_g2	6.44214	1.01e-32	4.83e-30	UP	TRINITY_DN1603_c1_g2	TraesCSU01G194600.1	355	456	456	3.95e-35	TraesCSU01G194600	chrUn	291905673	291906521	Heat shock protein
	TRINITY_DN6554_c0_g3	7.9456	1.04e-32	4.94e-30	UP	TRINITY_DN6554_c0_g3	TraesCSU01G047300.1	199	1	621	4.23e-67	TraesCSU01G047300	chrUn	37338311	37338931	Heat shock protein
	TRINITY_DN6476_c2_g1	6.23827	1.06e-32	5.01e-30	UP	TRINITY_DN6476_c2_g1	TraesCS3B01G130500.1	460	489	489	3.17e-07	TraesCS3B01G130500	chr3B	112835317	112836128	Heat shock protein
	TRINITY_DN126_c1_g1	8.10393	1.13e-32	5.27e-30	UP	TRINITY_DN126_c1_g1	TraesCS3D01G045700.1	316	456	456	1.49e-58	TraesCS3D01G045700	chr3D	17413454	17413909	Heat shock protein
	TRINITY_DN1603_c0_g1	7.4168	1.28e-32	5.93e-30	UP	TRINITY_DN1603_c0_g1	TraesCS4D01G213100.1	1	469	474	0	TraesCS4D01G213100	chr4D	365864520	365864993	Heat-shock protein, putative
	TRINITY_DN102758_c0_g1	8.50897	1.28e-32	5.93e-30	UP	TRINITY_DN102758_c0_g1	TraesCS4D01G059000.1	566	703	1740	9.97e-64	TraesCS4D01G059000	chr4D	35119279	35121323	ethylene-dependent gravitropism-deficient and yellow-green-like 2
	TRINITY_DN853_c0_g1	9.9879	1.45e-32	6.66e-30	UP	TRINITY_DN853_c0_g1	TraesCS4A01G092600.1	331	468	468	8.15e-65	TraesCS4A01G092600	chr4A	99913715	99914182	Heat-shock protein
	TRINITY_DN2137_c0_g1	10.8436	1.9e-32	8.67e-30	UP	NA	NA	NA	NA	NA	NA	NA	NA	NA	NA	NA
	TRINITY_DN19099_c0_g3	12.0961	1.91e-32	8.7e-30	UP	TRINITY_DN19099_c0_g3	TraesCS2A01G203300.1	672	722	2094	9.2e-19	TraesCS2A01G203300	chr2A	179278800	179298601	Phospholipid-transporting ATPase
	TRINITY_DN692_c1_g1	11.1329	2.5e-32	1.13e-29	UP	TRINITY_DN692_c1_g1	TraesCS2B01G230600.1	1607	1434	2094	2.53e-82	TraesCS2B01G230600	chr2B	226688033	226702270	Phospholipid-transporting ATPase
	TRINITY_DN23480_c0_g2	12.267	2.62e-32	1.18e-29	UP	TRINITY_DN23480_c0_g2	TraesCS4A01G371600.1	957	820	957	7.19e-64	TraesCS4A01G371600	chr4A	645420263	645423398	Myeloid leukemia factor 1
	TRINITY_DN15287_c6_g1	12.0446	2.72e-32	1.22e-29	UP	NA	NA	NA	NA	NA	NA	NA	NA	NA	NA	NA
	TRINITY_DN15062_c0_g1	6.36884	3.02e-32	1.34e-29	UP	TRINITY_DN15062_c0_g1	TraesCS4D01G357900.1	1464	1701	3855	8.67e-123	TraesCS4D01G357900	chr4D	505999122	506003500	BAG family molecular chaperone regulator 6
	TRINITY_DN160554_c0_g1	7.96287	3.18e-32	1.41e-29	UP	TRINITY_DN160554_c0_g1	TraesCS3D01G046700.1	59	308	456	9.35e-118	TraesCS3D01G046700	chr3D	17591725	17592180	Heat shock protein
	TRINITY_DN16650_c0_g1	6.51787	3.27e-32	1.44e-29	UP	TRINITY_DN16650_c0_g1	TraesCS7B01G094500.1	752	840	963	2.64e-38	TraesCS7B01G094500	chr7B	108284083	108286257	Nuclear migration protein nudC
	TRINITY_DN8393_c1_g1	7.28551	3.34e-32	1.47e-29	UP	TRINITY_DN8393_c1_g1	TraesCS3D01G045500.1	349	456	456	1.48e-50	TraesCS3D01G045500	chr3D	17391738	17392193	Heat shock protein
	TRINITY_DN4776_c0_g1	6.45844	3.72e-32	1.62e-29	UP	TRINITY_DN4776_c0_g1	TraesCS3D01G115100.1	1	119	480	6.93e-55	TraesCS3D01G115100	chr3D	68389095	68389856	Heat shock protein
	TRINITY_DN3766_c1_g1	6.85366	4.28e-32	1.85e-29	UP	TRINITY_DN3766_c1_g1	TraesCS5A01G314600.1	208	615	615	0	TraesCS5A01G314600	chr5A	525025891	525026586	Ethylene-responsive transcription factor
	TRINITY_DN2856_c0_g1	6.06356	4.93e-32	2.11e-29	UP	TRINITY_DN2856_c0_g1	TraesCS5A01G547300.1	237	461	2925	6.77e-115	TraesCS5A01G547300	chr5A	701070086	701075789	ATP-dependent chaperone ClpB
	TRINITY_DN12630_c0_g1	10.7518	7.11e-32	3.02e-29	UP	NA	NA	NA	NA	NA	NA	NA	NA	NA	NA	NA
	TRINITY_DN7924_c0_g2	10.4311	7.76e-32	3.26e-29	UP	TRINITY_DN7924_c0_g2	TraesCS7B01G388700.1	891	1563	3873	0	TraesCS7B01G388700	chr7B	654949049	654953437	BAG family molecular chaperone regulator 6
	TRINITY_DN8323_c0_g2	5.27752	8.19e-32	3.43e-29	UP	TRINITY_DN8323_c0_g2	TraesCS2A01G532000.1	1	267	267	9.36e-104	TraesCS2A01G532000	chr2A	748685250	748685516	Wound-responsive family protein
	TRINITY_DN3424_c0_g1	8.57478	8.48e-32	3.53e-29	UP	TRINITY_DN3424_c0_g1	TraesCS4B01G213300.1	1	1096	1098	0	TraesCS4B01G213300	chr4B	451811242	451812339	Retrotransposon protein, putative, Ty1-copia subclass
	TRINITY_DN6541_c1_g2	12.3573	1.21e-31	5e-29	UP	TRINITY_DN6541_c1_g2	TraesCS4D01G035800.1	1	137	1155	5.33e-60	TraesCS4D01G035800	chr4D	16020765	16022120	Pre-mRNA-splicing factor 18
	TRINITY_DN160400_c0_g1	12.247	1.27e-31	5.2e-29	UP	NA	NA	NA	NA	NA	NA	NA	NA	NA	NA	NA
	TRINITY_DN3820_c0_g3	8.60056	1.29e-31	5.26e-29	UP	TRINITY_DN3820_c0_g3	TraesCS7D01G274700.1	24	154	942	3.18e-21	TraesCS7D01G274700	chr7D	264319784	264320725	DUF241 domain protein (DUF241)
	TRINITY_DN19294_c0_g1	5.57135	1.66e-31	6.72e-29	UP	TRINITY_DN19294_c0_g1	TraesCS5A01G426100.1	55	153	1266	3.15e-43	TraesCS5A01G426100	chr5A	611339340	611341842	Chaperone protein dnaJ, putative
	TRINITY_DN948_c0_g1	6.59529	2.19e-31	8.75e-29	UP	TRINITY_DN948_c0_g1	TraesCS1D01G342100.1	2589	2757	2757	6.15e-81	TraesCS1D01G342100	chr1D	431826446	431829513	ATP-dependent chaperone ClpB
	TRINITY_DN976_c1_g1	13.0632	2.21e-31	8.78e-29	UP	TRINITY_DN976_c1_g1	TraesCS6B01G420200.1	1	200	1038	5.71e-95	TraesCS6B01G420200	chr6B	691782272	691783993	Cinnamoyl CoA reductase
	TRINITY_DN13657_c0_g3	11.841	2.5e-31	9.89e-29	UP	NA	NA	NA	NA	NA	NA	NA	NA	NA	NA	NA
	TRINITY_DN112513_c0_g1	8.3002	2.52e-31	9.95e-29	UP	TRINITY_DN112513_c0_g1	TraesCS1B01G151300.1	1443	1655	2061	5.16e-102	TraesCS1B01G151300	chr1B	236957822	236963066	Chaperone DnaK
	TRINITY_DN106393_c0_g1	11.7713	2.88e-31	1.13e-28	UP	TRINITY_DN106393_c0_g1	TraesCS4B01G380800.1	397	464	2928	1.44e-26	TraesCS4B01G380800	chr4B	660723123	660728928	ATP-dependent chaperone ClpB
	TRINITY_DN31066_c3_g1	13.9706	2.89e-31	1.13e-28	UP	NA	NA	NA	NA	NA	NA	NA	NA	NA	NA	NA
	TRINITY_DN9943_c0_g2	12.7271	3.89e-31	1.51e-28	UP	TRINITY_DN9943_c0_g2	TraesCS6A01G074700.1	643	856	882	1.69e-109	TraesCS6A01G074700	chr6A	43274512	43276548	Lon protease
	TRINITY_DN48693_c0_g1	11.7572	4.37e-31	1.68e-28	UP	TRINITY_DN48693_c0_g1	TraesCS7D01G475100.1	521	307	744	9.73e-110	TraesCS7D01G475100	chr7D	587119217	587120736	Basic-leucine zipper (BZIP) transcription factor family
	TRINITY_DN12920_c1_g1	8.60275	6.29e-31	2.42e-28	UP	TRINITY_DN12920_c1_g1	TraesCS4A01G098600.1	485	756	2010	1.27e-136	TraesCS4A01G098600	chr4A	110636564	110639356	70 kDa heat shock protein
	TRINITY_DN14627_c0_g1	12.1513	6.68e-31	2.55e-28	UP	TRINITY_DN14627_c0_g1	TraesCS6D01G049100.1	676	777	1998	3.57e-47	TraesCS6D01G049100	chr6D	23832974	23836459	Heat shock 70 kDa protein
	TRINITY_DN36499_c0_g1	11.7214	7.43e-31	2.83e-28	UP	TRINITY_DN36499_c0_g1	TraesCS7D01G549800.1	18	292	921	2.77e-103	TraesCS7D01G549800	chr7D	634411229	634412149	Glucuronoxylan 4-O-methyltransferase
	TRINITY_DN42770_c0_g1	6.83962	8.07e-31	3.06e-28	UP	NA	NA	NA	NA	NA	NA	NA	NA	NA	NA	NA
	TRINITY_DN1268_c0_g1	8.40716	9.26e-31	3.48e-28	UP	TRINITY_DN1268_c0_g1	TraesCS4A01G226700.1	1	747	747	0	TraesCS4A01G226700	chr4A	534811309	534812238	Heat-shock protein, putative
	TRINITY_DN11797_c0_g1	7.722	9.94e-31	3.72e-28	UP	NA	NA	NA	NA	NA	NA	NA	NA	NA	NA	NA
	TRINITY_DN2224_c0_g1	6.98648	1e-30	3.74e-28	UP	TRINITY_DN2224_c0_g1	TraesCS2A01G394600.1	1	198	198	1.19e-96	TraesCS2A01G394600	chr2A	644308084	644308281	Heparan sulfate 2-O-sulfotransferase 1
	TRINITY_DN19273_c0_g1	7.01412	1.31e-30	4.87e-28	UP	TRINITY_DN19273_c0_g1	TraesCS4D01G103300.1	297	558	1044	4.46e-126	TraesCS4D01G103300	chr4D	81984987	81987448	Alcohol dehydrogenase
	TRINITY_DN67836_c0_g1	6.42714	1.46e-30	5.4e-28	UP	TRINITY_DN67836_c0_g1	TraesCS2D01G276000.1	1653	1431	1653	1.06e-112	TraesCS2D01G276000	chr2D	345623985	345626820	Peptidylprolyl isomerase
	TRINITY_DN7889_c0_g2	8.86449	1.51e-30	5.56e-28	UP	TRINITY_DN7889_c0_g2	TraesCS7D01G430900.1	998	1	1023	0	TraesCS7D01G430900	chr7D	550236942	550237964	gamma-irradiation and mitomycin c induced 1
	TRINITY_DN2223_c1_g1	7.82718	1.56e-30	5.71e-28	UP	NA	NA	NA	NA	NA	NA	NA	NA	NA	NA	NA
	TRINITY_DN16358_c0_g2	7.51969	1.9e-30	6.86e-28	UP	TRINITY_DN16358_c0_g2	TraesCS4A01G202300.1	1	85	1140	9.14e-38	TraesCS4A01G202300	chr4A	492030110	492032620	Alcohol dehydrogenase
	TRINITY_DN13029_c0_g2	9.38138	1.92e-30	6.94e-28	UP	TRINITY_DN13029_c0_g2	TraesCS4B01G205700.1	1873	1972	1974	1.29e-45	TraesCS4B01G205700	chr4B	437949085	437951192	70 kDa heat shock protein
	TRINITY_DN18405_c0_g1	6.87953	1.93e-30	6.94e-28	UP	TRINITY_DN18405_c0_g1	TraesCS1A01G133100.1	962	1032	2022	7.63e-30	TraesCS1A01G133100	chr1A	185141618	185146174	Chaperone DnaK
	TRINITY_DN7924_c0_g1	6.96623	2.03e-30	7.26e-28	UP	TRINITY_DN7924_c0_g1	TraesCS4D01G357900.1	1380	1053	3855	5.4e-161	TraesCS4D01G357900	chr4D	505999122	506003500	BAG family molecular chaperone regulator 6
	TRINITY_DN2534_c0_g1	9.4239	2.31e-30	8.19e-28	UP	TRINITY_DN2534_c0_g1	TraesCS2A01G117600.1	702	572	1404	2.13e-62	TraesCS2A01G117600	chr2A	67969846	67979486	Ankyrin repeat protein-like
	TRINITY_DN19556_c0_g1	11.9107	2.62e-30	9.26e-28	UP	TRINITY_DN19556_c0_g1	TraesCS5B01G503400.1	54	114	399	9.43e-23	TraesCS5B01G503400	chr5B	670019115	670020322	DNA polymerase epsilon catalytic subunit A, putative
	TRINITY_DN13693_c0_g1	13.4552	3.26e-30	1.14e-27	UP	NA	NA	NA	NA	NA	NA	NA	NA	NA	NA	NA
	TRINITY_DN12882_c1_g1	5.04987	3.27e-30	1.14e-27	UP	TRINITY_DN12882_c1_g1	TraesCS7B01G354200.1	75	425	843	2.5e-160	TraesCS7B01G354200	chr7B	612255302	612256461	Polyubiquitin
	TRINITY_DN1162_c0_g1	6.77935	3.37e-30	1.17e-27	UP	TRINITY_DN1162_c0_g1	TraesCS1B01G336600.1	1	2004	2403	0	TraesCS1B01G336600	chr1B	563538986	563541787	Retrovirus-related Pol polyprotein from transposon TNT 1-94
	TRINITY_DN175026_c0_g1	8.03028	3.59e-30	1.24e-27	UP	NA	NA	NA	NA	NA	NA	NA	NA	NA	NA	NA
	TRINITY_DN39144_c0_g1	6.96283	3.96e-30	1.37e-27	UP	TRINITY_DN39144_c0_g1	TraesCS5B01G023000.1	700	760	891	2.36e-24	TraesCS5B01G023000	chr5B	21411180	21413390	2-aminoethanethiol dioxygenase
	TRINITY_DN3681_c2_g2	11.8132	4.15e-30	1.42e-27	UP	TRINITY_DN3681_c2_g2	TraesCS2A01G532400.1	52	273	273	3.67e-62	TraesCS2A01G532400	chr2A	748776021	748776293	Wound-responsive family protein
	TRINITY_DN12094_c0_g3	11.6771	4.16e-30	1.42e-27	UP	NA	NA	NA	NA	NA	NA	NA	NA	NA	NA	NA
	TRINITY_DN426_c1_g1	6.14156	4.18e-30	1.42e-27	UP	TRINITY_DN426_c1_g1	TraesCS4D01G357900.1	858	1195	3855	7.07e-175	TraesCS4D01G357900	chr4D	505999122	506003500	BAG family molecular chaperone regulator 6
	TRINITY_DN7924_c0_g3	8.04632	5.27e-30	1.77e-27	UP	TRINITY_DN7924_c0_g3	TraesCS4D01G357900.1	651	960	3855	1.1e-162	TraesCS4D01G357900	chr4D	505999122	506003500	BAG family molecular chaperone regulator 6
	TRINITY_DN14156_c0_g1	5.89171	7.34e-30	2.46e-27	UP	TRINITY_DN14156_c0_g1	TraesCS5A01G260600.1	67	127	1899	3.04e-24	TraesCS5A01G260600	chr5A	474541564	474544822	Heat shock protein 90
	TRINITY_DN22360_c0_g1	6.74189	7.61e-30	2.54e-27	UP	TRINITY_DN22360_c0_g1	TraesCS6A01G042600.1	1408	1474	1998	4.18e-26	TraesCS6A01G042600	chr6A	22442891	22446356	Heat shock 70 kDa protein
	TRINITY_DN14061_c1_g1	12.7126	7.95e-30	2.64e-27	UP	NA	NA	NA	NA	NA	NA	NA	NA	NA	NA	NA
	TRINITY_DN133181_c0_g1	7.63671	9.23e-30	3.05e-27	UP	TRINITY_DN133181_c0_g1	TraesCS5D01G393200.1	319	593	1134	5.95e-140	TraesCS5D01G393200	chr5D	461439693	461440998	Heat shock transcription factor
	TRINITY_DN56702_c2_g1	12.4699	1.02e-29	3.35e-27	UP	NA	NA	NA	NA	NA	NA	NA	NA	NA	NA	NA
	TRINITY_DN77260_c1_g1	10.5028	1.03e-29	3.38e-27	UP	TRINITY_DN77260_c1_g1	TraesCS4D01G226000.1	717	443	717	1.23e-132	TraesCS4D01G226000	chr4D	384975222	384976356	Heat shock protein
	TRINITY_DN21871_c0_g2	11.8133	1.12e-29	3.67e-27	UP	TRINITY_DN21871_c0_g2	TraesCS5A01G545900.1	555	488	555	5.63e-28	TraesCS5A01G545900	chr5A	700444726	700445401	Phosphatidylinositol N-acetylglucosaminyltransferase subunit P
	TRINITY_DN4010_c0_g1	6.99792	1.15e-29	3.75e-27	UP	TRINITY_DN4010_c0_g1	TraesCS3D01G273600.1	1	2742	2742	0	TraesCS3D01G273600	chr3D	379536248	379539614	Chaperone clpb, putative
	TRINITY_DN20857_c0_g1	8.18079	1.22e-29	3.94e-27	UP	NA	NA	NA	NA	NA	NA	NA	NA	NA	NA	NA
	TRINITY_DN50734_c0_g1	6.25363	1.25e-29	4.04e-27	UP	NA	NA	NA	NA	NA	NA	NA	NA	NA	NA	NA
	TRINITY_DN25126_c0_g4	11.9588	1.43e-29	4.59e-27	UP	TRINITY_DN25126_c0_g4	TraesCS3B01G011900.1	500	570	570	1.08e-29	TraesCS3B01G011900	chr3B	5322076	5323635	50S ribosomal protein L6
	TRINITY_DN63908_c0_g1	11.8637	1.48e-29	4.73e-27	UP	TRINITY_DN63908_c0_g1	TraesCS5B01G249000.1	276	450	1614	6.53e-79	TraesCS5B01G249000	chr5B	431074368	431078699	Chaperone protein htpG family protein
	TRINITY_DN8393_c4_g1	8.05701	1.51e-29	4.79e-27	UP	TRINITY_DN8393_c4_g1	TraesCS3D01G045500.1	355	72	456	1.33e-146	TraesCS3D01G045500	chr3D	17391738	17392193	Heat shock protein
	TRINITY_DN15834_c0_g2	11.1067	1.63e-29	5.14e-27	UP	TRINITY_DN15834_c0_g2	TraesCS7A01G360400.1	1	214	1077	2.44e-99	TraesCS7A01G360400	chr7A	533995324	533996694	Heat shock transcription factor family protein
	TRINITY_DN2262_c0_g2	10.8274	1.84e-29	5.8e-27	UP	NA	NA	NA	NA	NA	NA	NA	NA	NA	NA	NA
	TRINITY_DN202456_c0_g1	12.2687	2.32e-29	7.24e-27	UP	NA	NA	NA	NA	NA	NA	NA	NA	NA	NA	NA
	TRINITY_DN15765_c0_g1	7.62538	2.33e-29	7.27e-27	UP	NA	NA	NA	NA	NA	NA	NA	NA	NA	NA	NA
	TRINITY_DN13064_c0_g1	9.39188	2.45e-29	7.58e-27	UP	TRINITY_DN13064_c0_g1	TraesCS3A01G274400.1	1897	1961	2742	4.71e-25	TraesCS3A01G274400	chr3A	503751786	503755145	Chaperone clpb, putative
	TRINITY_DN19933_c0_g2	13.0051	3.02e-29	9.32e-27	UP	TRINITY_DN19933_c0_g2	TraesCS7A01G449300.1	151	369	369	1.88e-108	TraesCS7A01G449300	chr7A	643297089	643297519	6-hydroxynicotinate 3-monooxygenase
	TRINITY_DN6233_c0_g1	12.7619	3.12e-29	9.6e-27	UP	TRINITY_DN6233_c0_g1	TraesCS4D01G055500.1	1161	1389	1389	2.52e-117	TraesCS4D01G055500	chr4D	30513828	30515216	Anthocyanin 5-aromatic acyltransferase
	TRINITY_DN11799_c0_g2	11.6703	4.17e-29	1.28e-26	UP	TRINITY_DN11799_c0_g2	TraesCS7D01G088800.1	24	94	393	5.98e-30	TraesCS7D01G088800	chr7D	53711008	53711611	Early nodulin 93
	TRINITY_DN21995_c0_g1	11.597	4.25e-29	1.3e-26	UP	TRINITY_DN21995_c0_g1	TraesCS7D01G438600.1	616	837	1587	6.29e-114	TraesCS7D01G438600	chr7D	557835765	557838778	Cytochrome P450
	TRINITY_DN17251_c0_g1	8.39434	4.76e-29	1.45e-26	UP	TRINITY_DN17251_c0_g1	TraesCS3D01G045500.1	257	456	456	2.62e-93	TraesCS3D01G045500	chr3D	17391738	17392193	Heat shock protein
	TRINITY_DN12123_c0_g1	7.60224	4.98e-29	1.51e-26	UP	TRINITY_DN12123_c0_g1	TraesCS2B01G561600.1	1	303	303	4.41e-140	TraesCS2B01G561600	chr2B	754151966	754152580	Wound-responsive family protein
	TRINITY_DN15091_c0_g2	6.58463	5.78e-29	1.74e-26	UP	TRINITY_DN15091_c0_g2	TraesCS4A01G092100.1	1	128	477	8.9e-60	TraesCS4A01G092100	chr4A	98785516	98785992	Heat-shock protein, putative
	TRINITY_DN189749_c0_g1	11.9963	6.78e-29	2.02e-26	UP	TRINITY_DN189749_c0_g1	TraesCS7D01G294100.1	132	1	339	6.48e-64	TraesCS7D01G294100	chr7D	365318801	365322424	NADH dehydrogenase [ubiquinone] iron-sulfur protein 6, mitochondrial
	TRINITY_DN7382_c0_g1	4.90731	7.13e-29	2.12e-26	UP	TRINITY_DN7382_c0_g1	TraesCS2A01G532200.1	13	258	258	1.28e-111	TraesCS2A01G532200	chr2A	748698132	748698389	Wound-responsive family protein
	TRINITY_DN19706_c0_g1	8.5198	7.49e-29	2.22e-26	UP	TRINITY_DN19706_c0_g1	TraesCS5A01G547300.1	1093	1178	2925	1.63e-37	TraesCS5A01G547300	chr5A	701070086	701075789	ATP-dependent chaperone ClpB
	TRINITY_DN4776_c0_g4	6.49759	8.08e-29	2.38e-26	UP	TRINITY_DN4776_c0_g4	TraesCS3D01G115100.1	251	1	480	6.58e-57	TraesCS3D01G115100	chr3D	68389095	68389856	Heat shock protein
	TRINITY_DN54620_c1_g1	7.27092	9.37e-29	2.74e-26	UP	TRINITY_DN54620_c1_g1	TraesCS3B01G087400.1	323	390	762	5.1e-28	TraesCS3B01G087400	chr3B	55456681	55459679	Triosephosphate isomerase
	TRINITY_DN43642_c0_g1	6.7943	1.1e-28	3.19e-26	UP	TRINITY_DN43642_c0_g1	TraesCS6D01G369300.1	1	98	831	5.49e-41	TraesCS6D01G369300	chr6D	456092952	456094004	PPPDE thiol peptidase family protein, putative
	TRINITY_DN10160_c0_g1	11.6721	1.1e-28	3.19e-26	UP	TRINITY_DN10160_c0_g1	TraesCS7B01G331200.2	1	615	615	0	TraesCS7B01G331200	chr7B	586631196	586632010	protease Do-like protein
	TRINITY_DN133181_c3_g1	8.16825	1.14e-28	3.29e-26	UP	TRINITY_DN133181_c3_g1	TraesCS5A01G383800.1	524	373	1119	3.86e-67	TraesCS5A01G383800	chr5A	581487008	581488298	Heat shock transcription factor
	TRINITY_DN19576_c0_g1	11.5248	1.22e-28	3.52e-26	UP	TRINITY_DN19576_c0_g1	TraesCS7A01G284700.1	853	905	1077	5.9e-20	TraesCS7A01G284700	chr7A	324923899	324926230	Activator of 90 kDa heat shock ATPase-like protein
	TRINITY_DN678_c0_g1	5.41659	1.55e-28	4.43e-26	UP	TRINITY_DN678_c0_g1	TraesCS6A01G323800.1	1	389	498	0	TraesCS6A01G323800	chr6A	557094125	557094992	Universal stress protein family protein
	TRINITY_DN15062_c0_g2	8.348	1.66e-28	4.73e-26	UP	TRINITY_DN15062_c0_g2	TraesCS7B01G388700.1	1726	1369	3873	0	TraesCS7B01G388700	chr7B	654949049	654953437	BAG family molecular chaperone regulator 6
	TRINITY_DN1299_c0_g1	6.14846	1.9e-28	5.38e-26	UP	TRINITY_DN1299_c0_g1	TraesCS1D01G424500.1	1	426	426	0	TraesCS1D01G424500	chr1D	478819630	478820055	Programmed cell death protein 4
	TRINITY_DN26678_c0_g1	13.0782	1.95e-28	5.51e-26	UP	NA	NA	NA	NA	NA	NA	NA	NA	NA	NA	NA
	TRINITY_DN4137_c0_g1	5.2354	2.05e-28	5.76e-26	UP	NA	NA	NA	NA	NA	NA	NA	NA	NA	NA	NA
	TRINITY_DN8393_c4_g2	7.80215	2.2e-28	6.17e-26	UP	TRINITY_DN8393_c4_g2	TraesCS4A01G092600.1	411	93	468	1.15e-147	TraesCS4A01G092600	chr4A	99913715	99914182	Heat-shock protein
	TRINITY_DN46129_c1_g2	5.57861	2.3e-28	6.45e-26	UP	NA	NA	NA	NA	NA	NA	NA	NA	NA	NA	NA
	TRINITY_DN1983_c0_g2	9.56921	2.37e-28	6.6e-26	UP	NA	NA	NA	NA	NA	NA	NA	NA	NA	NA	NA
	TRINITY_DN43285_c0_g1	11.5206	2.38e-28	6.6e-26	UP	TRINITY_DN43285_c0_g1	TraesCS1A01G317200.1	595	654	933	6.78e-24	TraesCS1A01G317200	chr1A	508641117	508642831	DCD (Development and cell death) domain protein
	TRINITY_DN15629_c0_g1	11.9734	2.41e-28	6.67e-26	UP	NA	NA	NA	NA	NA	NA	NA	NA	NA	NA	NA
	TRINITY_DN23961_c0_g2	5.32407	2.72e-28	7.51e-26	UP	TRINITY_DN23961_c0_g2	TraesCS7A01G159600.1	70	419	717	7.29e-180	TraesCS7A01G159600	chr7A	115903779	115904909	Chaperone protein dnaJ
	TRINITY_DN8252_c0_g1	5.51713	2.79e-28	7.69e-26	UP	TRINITY_DN8252_c0_g1	TraesCS6B01G405700.1	600	679	681	4.55e-12	TraesCS6B01G405700	chr6B	680726871	680729775	Rhomboid family protein
	TRINITY_DN39999_c1_g1	6.34202	2.9e-28	7.95e-26	UP	TRINITY_DN39999_c1_g1	TraesCS4B01G059400.1	726	798	801	1.1e-26	TraesCS4B01G059400	chr4B	50725324	50728143	transmembrane protein
	TRINITY_DN72105_c0_g2	11.5227	4.42e-28	1.2e-25	UP	TRINITY_DN72105_c0_g2	TraesCS4B01G179300.1	326	386	1011	1.83e-24	TraesCS4B01G179300	chr4B	392657973	392659263	Hexosyltransferase
	TRINITY_DN9992_c0_g1	5.46662	5.02e-28	1.35e-25	UP	TRINITY_DN9992_c0_g1	TraesCS7A01G242200.1	480	549	2103	8.88e-29	TraesCS7A01G242200	chr7A	217555694	217559742	Heat shock protein 90
	TRINITY_DN5643_c0_g1	5.25677	5.42e-28	1.46e-25	UP	TRINITY_DN5643_c0_g1	TraesCS6B01G374100.1	1	533	537	0	TraesCS6B01G374100	chr6B	646946222	646946873	Heat-shock protein, putative
	TRINITY_DN12615_c0_g1	6.38803	5.45e-28	1.46e-25	UP	TRINITY_DN12615_c0_g1	TraesCSU01G105300.1	144	444	1479	1.07e-157	TraesCSU01G105300	chrUn	92716703	92720318	Catalase
	TRINITY_DN85305_c1_g1	11.6776	6.19e-28	1.65e-25	UP	NA	NA	NA	NA	NA	NA	NA	NA	NA	NA	NA
	TRINITY_DN12004_c0_g1	8.60164	6.22e-28	1.66e-25	UP	TRINITY_DN12004_c0_g1	TraesCS2B01G294500.1	1108	1204	1764	1.04e-42	TraesCS2B01G294500	chr2B	411140591	411143398	Peptidylprolyl isomerase
	TRINITY_DN3476_c0_g1	4.92395	7.83e-28	2.07e-25	UP	TRINITY_DN3476_c0_g1	TraesCS2A01G484400.1	134	56	498	1.03e-22	TraesCS2A01G484400	chr2A	719548223	719561160	cytochrome P450, family 71, subfamily A, polypeptide 14
	TRINITY_DN12520_c1_g1	11.5722	8.24e-28	2.17e-25	UP	TRINITY_DN12520_c1_g1	TraesCS3D01G002000.1	955	1044	1044	3.92e-32	TraesCS3D01G002000	chr3D	926270	929262	RNA polymerase II-associated factor 1
	TRINITY_DN7915_c0_g1	11.739	1.11e-27	2.92e-25	UP	NA	NA	NA	NA	NA	NA	NA	NA	NA	NA	NA
	TRINITY_DN11891_c0_g2	8.72782	1.23e-27	3.21e-25	UP	NA	NA	NA	NA	NA	NA	NA	NA	NA	NA	NA
	TRINITY_DN35806_c0_g1	5.63589	1.27e-27	3.31e-25	UP	TRINITY_DN35806_c0_g1	TraesCS5B01G295600.1	222	296	615	6.91e-32	TraesCS5B01G295600	chr5B	479387909	479389657	UPF0664 stress-induced protein C29B12.11c
	TRINITY_DN6139_c0_g3	8.0188	1.31e-27	3.4e-25	UP	NA	NA	NA	NA	NA	NA	NA	NA	NA	NA	NA
	TRINITY_DN13161_c1_g2	11.4522	1.31e-27	3.41e-25	UP	TRINITY_DN13161_c1_g2	TraesCS1B01G072700.1	1351	1406	1533	2.57e-16	TraesCS1B01G072700	chr1B	57104191	57105723	Pentatricopeptide repeat-containing protein
	TRINITY_DN16652_c0_g2	6.12597	1.4e-27	3.63e-25	UP	TRINITY_DN16652_c0_g2	TraesCS4D01G145600.1	181	1	489	4.45e-91	TraesCS4D01G145600	chr4D	134563191	134563966	Heat shock protein
	TRINITY_DN42836_c0_g1	8.64926	1.43e-27	3.68e-25	UP	TRINITY_DN42836_c0_g1	TraesCS3A01G471800.1	970	1350	1350	0	TraesCS3A01G471800	chr3A	703183355	703184996	Basic 7S globulin 2
	TRINITY_DN12165_c0_g1	5.13142	1.43e-27	3.68e-25	UP	TRINITY_DN12165_c0_g1	TraesCS7D01G274700.1	23	157	942	4.04e-27	TraesCS7D01G274700	chr7D	264319784	264320725	DUF241 domain protein (DUF241)
	TRINITY_DN24388_c0_g1	6.77083	1.66e-27	4.24e-25	UP	TRINITY_DN24388_c0_g1	TraesCS3D01G273600.1	572	1120	2742	0	TraesCS3D01G273600	chr3D	379536248	379539614	Chaperone clpb, putative
	TRINITY_DN1842_c0_g1	5.6266	1.68e-27	4.28e-25	UP	NA	NA	NA	NA	NA	NA	NA	NA	NA	NA	NA
	TRINITY_DN13845_c0_g1	7.82696	1.77e-27	4.5e-25	UP	TRINITY_DN13845_c0_g1	TraesCS3B01G131300.1	300	489	489	1.6e-95	TraesCS3B01G131300	chr3B	113512069	113512557	Heat-shock protein, putative
	TRINITY_DN3274_c0_g1	8.7617	1.95e-27	4.95e-25	UP	TRINITY_DN3274_c0_g1	TraesCS4D01G035800.1	77	1155	1155	0	TraesCS4D01G035800	chr4D	16020765	16022120	Pre-mRNA-splicing factor 18
	TRINITY_DN10628_c1_g1	11.4245	2.01e-27	5.09e-25	UP	TRINITY_DN10628_c1_g1	TraesCS7D01G387800.1	1	85	390	8.59e-38	TraesCS7D01G387800	chr7D	501609644	501610033	Glutamine dumper, putative
	TRINITY_DN96839_c0_g1	13.1736	2.16e-27	5.45e-25	UP	NA	NA	NA	NA	NA	NA	NA	NA	NA	NA	NA
	TRINITY_DN1889_c1_g1	5.83907	2.49e-27	6.26e-25	UP	NA	NA	NA	NA	NA	NA	NA	NA	NA	NA	NA
	TRINITY_DN7351_c0_g1	9.2217	2.49e-27	6.26e-25	UP	TRINITY_DN7351_c0_g1	TraesCS5D01G138700.1	69	133	303	1.27e-15	TraesCS5D01G138700	chr5D	220754227	220755842	disease resistance protein (TIR-NBS-LRR class) family
	TRINITY_DN6195_c1_g1	12.0754	2.59e-27	6.46e-25	UP	TRINITY_DN6195_c1_g1	TraesCS2A01G388800.1	469	386	1149	4.11e-33	TraesCS2A01G388800	chr2A	636904233	636910541	Formin-like protein
	TRINITY_DN288_c0_g1	5.22259	2.6e-27	6.48e-25	UP	NA	NA	NA	NA	NA	NA	NA	NA	NA	NA	NA
	TRINITY_DN45538_c0_g1	12.3562	2.62e-27	6.48e-25	UP	TRINITY_DN45538_c0_g1	TraesCS6B01G420000.1	1	417	1038	0	TraesCS6B01G420000	chr6B	691632058	691633453	Cinnamoyl CoA reductase
	TRINITY_DN163510_c1_g2	11.5637	2.64e-27	6.53e-25	UP	NA	NA	NA	NA	NA	NA	NA	NA	NA	NA	NA
	TRINITY_DN8393_c0_g1	6.83529	2.66e-27	6.56e-25	UP	TRINITY_DN8393_c0_g1	TraesCS2A01G014000.1	1	184	1155	3.31e-38	TraesCS2A01G014000	chr2A	5663471	5665685	D-amino acid dehydrogenase
	TRINITY_DN11387_c0_g1	11.8011	3.17e-27	7.77e-25	UP	TRINITY_DN11387_c0_g1	TraesCS5D01G031700.1	515	598	819	1.86e-25	TraesCS5D01G031700	chr5D	29132316	29134261	2-aminoethanethiol dioxygenase
	TRINITY_DN26687_c0_g3	8.64678	3.43e-27	8.39e-25	UP	NA	NA	NA	NA	NA	NA	NA	NA	NA	NA	NA
	TRINITY_DN19907_c0_g1	7.09833	3.51e-27	8.54e-25	UP	TRINITY_DN19907_c0_g1	TraesCS5B01G152400.1	1	606	606	0	TraesCS5B01G152400	chr5B	281644236	281644841	Calcium-binding protein
	TRINITY_DN8974_c0_g1	12.097	3.61e-27	8.75e-25	UP	NA	NA	NA	NA	NA	NA	NA	NA	NA	NA	NA
	TRINITY_DN242_c3_g1	13.0335	3.84e-27	9.27e-25	UP	TRINITY_DN242_c3_g1	TraesCS4B01G106400.1	222	531	1131	5.17e-151	TraesCS4B01G106400	chr4B	115845572	115848000	Alcohol dehydrogenase
	TRINITY_DN11799_c0_g1	6.74571	3.93e-27	9.45e-25	UP	TRINITY_DN11799_c0_g1	TraesCS7D01G088800.1	170	393	393	1.4e-109	TraesCS7D01G088800	chr7D	53711008	53711611	Early nodulin 93
	TRINITY_DN242_c3_g2	11.8666	4.25e-27	1.02e-24	UP	TRINITY_DN242_c3_g2	TraesCS1B01G389200.1	460	673	1140	1.76e-89	TraesCS1B01G389200	chr1B	622706636	622708876	Alcohol dehydrogenase
	TRINITY_DN1003_c0_g1	6.72098	5.19e-27	1.24e-24	UP	TRINITY_DN1003_c0_g1	TraesCS4B01G288400.1	1	397	399	6.05e-141	TraesCS4B01G288400	chr4B	573387723	573388121	Ascorbate-specific PTS system EIIA component
	TRINITY_DN12927_c0_g1	6.61695	6.15e-27	1.46e-24	UP	NA	NA	NA	NA	NA	NA	NA	NA	NA	NA	NA
	TRINITY_DN10970_c0_g2	7.8722	7e-27	1.66e-24	UP	NA	NA	NA	NA	NA	NA	NA	NA	NA	NA	NA
	TRINITY_DN113297_c0_g1	11.86	7.48e-27	1.77e-24	UP	TRINITY_DN113297_c0_g1	TraesCS1B01G072700.1	1440	1516	1533	7.34e-28	TraesCS1B01G072700	chr1B	57104191	57105723	Pentatricopeptide repeat-containing protein
	TRINITY_DN20302_c0_g1	12.7987	7.73e-27	1.82e-24	UP	NA	NA	NA	NA	NA	NA	NA	NA	NA	NA	NA
	TRINITY_DN63461_c0_g1	9.03291	8.29e-27	1.95e-24	UP	TRINITY_DN63461_c0_g1	TraesCS4D01G059000.1	1034	1231	1740	6.26e-97	TraesCS4D01G059000	chr4D	35119279	35121323	ethylene-dependent gravitropism-deficient and yellow-green-like 2
	TRINITY_DN6606_c5_g1	8.29037	8.99e-27	2.11e-24	UP	TRINITY_DN6606_c5_g1	TraesCS3D01G482500.1	1214	1246	1248	8.74e-09	TraesCS3D01G482500	chr3D	579726311	579732989	Crossover junction endonuclease mus81
	TRINITY_DN16652_c0_g1	7.16457	9.7e-27	2.26e-24	UP	TRINITY_DN16652_c0_g1	TraesCS3A01G113000.1	1	232	489	4.14e-104	TraesCS3A01G113000	chr3A	80288788	80289478	Heat-shock protein, putative
	TRINITY_DN509_c1_g1	5.69785	9.95e-27	2.31e-24	UP	TRINITY_DN509_c1_g1	TraesCSU01G131300.1	684	2916	2916	0	TraesCSU01G131300	chrUn	110792543	110798430	ATP-dependent chaperone ClpB
	TRINITY_DN429_c0_g1	5.50267	9.96e-27	2.31e-24	UP	TRINITY_DN429_c0_g1	TraesCS1A01G146300.1	841	1	1128	0	TraesCS1A01G146300	chr1A	252509644	252511052	Retrovirus-related Pol polyprotein from transposon TNT 1-94
	TRINITY_DN17108_c0_g2	11.8836	1.09e-26	2.51e-24	UP	NA	NA	NA	NA	NA	NA	NA	NA	NA	NA	NA
	TRINITY_DN26014_c0_g1	11.684	1.17e-26	2.68e-24	UP	NA	NA	NA	NA	NA	NA	NA	NA	NA	NA	NA
	TRINITY_DN7453_c0_g1	5.59943	1.42e-26	3.23e-24	UP	TRINITY_DN7453_c0_g1	TraesCS5D01G031600.1	1	757	888	0	TraesCS5D01G031600	chr5D	28938583	28940781	2-aminoethanethiol dioxygenase
	TRINITY_DN16121_c0_g1	7.62262	1.43e-26	3.25e-24	UP	NA	NA	NA	NA	NA	NA	NA	NA	NA	NA	NA
	TRINITY_DN20010_c0_g1	6.29191	1.44e-26	3.26e-24	UP	TRINITY_DN20010_c0_g1	TraesCS1A01G120100.3	1805	1875	2298	5.43e-30	TraesCS1A01G120100	chr1A	132481070	132485645	70 kDa heat shock protein
	TRINITY_DN103587_c0_g1	11.4795	1.5e-26	3.39e-24	UP	NA	NA	NA	NA	NA	NA	NA	NA	NA	NA	NA
	TRINITY_DN19054_c0_g1	8.14108	1.57e-26	3.53e-24	UP	TRINITY_DN19054_c0_g1	TraesCS3D01G274400.1	1	138	1056	7.36e-38	TraesCS3D01G274400	chr3D	380479289	380485957	Transferase family protein
	TRINITY_DN42817_c0_g1	11.3489	1.59e-26	3.57e-24	UP	TRINITY_DN42817_c0_g1	TraesCS7B01G465100.1	1242	1491	1491	4.11e-129	TraesCS7B01G465100	chr7B	721210284	721212715	DDB1-and CUL4-associated factor
	TRINITY_DN242_c0_g1	5.91354	1.7e-26	3.8e-24	UP	TRINITY_DN242_c0_g1	TraesCS4B01G106300.2	149	212	1134	1.16e-23	TraesCS4B01G106300	chr4B	115556448	115559956	Alcohol dehydrogenase
	TRINITY_DN10719_c0_g2	12.3271	1.82e-26	4.04e-24	UP	TRINITY_DN10719_c0_g2	TraesCS4B01G114400.1	1	63	1164	1.05e-14	TraesCS4B01G114400	chr4B	129524890	129526053	Anthranilate synthase alpha subunit 2, chloroplastic
	TRINITY_DN17013_c1_g1	6.02574	1.97e-26	4.36e-24	UP	TRINITY_DN17013_c1_g1	TraesCS4D01G287100.1	184	1	276	9.73e-93	TraesCS4D01G287100	chr4D	459060225	459060598	BTB-POZ and MATH domain 4
	TRINITY_DN8503_c0_g1	11.8961	2.23e-26	4.93e-24	UP	TRINITY_DN8503_c0_g1	TraesCS5A01G482400.1	99	161	1146	2.37e-23	TraesCS5A01G482400	chr5A	654086402	654090003	Hsp70 nucleotide exchange factor fes1
	TRINITY_DN89048_c0_g1	6.13831	2.67e-26	5.88e-24	UP	TRINITY_DN89048_c0_g1	TraesCS5A01G547300.1	1667	2177	2925	0	TraesCS5A01G547300	chr5A	701070086	701075789	ATP-dependent chaperone ClpB
	TRINITY_DN39833_c0_g1	11.3107	2.81e-26	6.17e-24	UP	NA	NA	NA	NA	NA	NA	NA	NA	NA	NA	NA
	TRINITY_DN1889_c0_g1	5.76527	2.83e-26	6.19e-24	UP	TRINITY_DN1889_c0_g1	TraesCSU01G018900.1	1	134	753	5.2e-27	TraesCSU01G018900	chrUn	20705441	20706193	Polyubiquitin
	TRINITY_DN7915_c0_g2	11.6318	2.86e-26	6.26e-24	UP	NA	NA	NA	NA	NA	NA	NA	NA	NA	NA	NA
	TRINITY_DN95631_c0_g1	11.2777	2.98e-26	6.49e-24	UP	NA	NA	NA	NA	NA	NA	NA	NA	NA	NA	NA
	TRINITY_DN87316_c0_g2	7.22071	3.03e-26	6.6e-24	UP	TRINITY_DN87316_c0_g2	TraesCS5D01G454000.1	827	912	912	1.2e-36	TraesCS5D01G454000	chr5D	501150641	501152433	OTU domain-containing protein
	TRINITY_DN29297_c0_g1	11.9516	3.1e-26	6.73e-24	UP	TRINITY_DN29297_c0_g1	TraesCS7D01G463000.1	1	878	1065	0	TraesCS7D01G463000	chr7D	578177833	578179047	Auxin response factor
	TRINITY_DN46052_c0_g1	12.2761	3.18e-26	6.86e-24	UP	NA	NA	NA	NA	NA	NA	NA	NA	NA	NA	NA
	TRINITY_DN14304_c0_g1	5.40277	3.6e-26	7.72e-24	UP	TRINITY_DN14304_c0_g1	TraesCS1D01G284000.1	482	990	1845	0	TraesCS1D01G284000	chr1D	382234639	382237640	70 kDa heat shock protein
	TRINITY_DN19185_c0_g1	5.78241	4.09e-26	8.75e-24	UP	TRINITY_DN19185_c0_g1	TraesCS2A01G386800.1	1492	1622	1734	2.68e-61	TraesCS2A01G386800	chr2A	632604588	632607489	Hsp70-Hsp90 organizing protein 1
	TRINITY_DN41933_c0_g1	11.1513	4.21e-26	8.96e-24	UP	NA	NA	NA	NA	NA	NA	NA	NA	NA	NA	NA
	TRINITY_DN9992_c0_g2	4.59327	4.45e-26	9.41e-24	UP	TRINITY_DN9992_c0_g2	TraesCS7B01G149200.1	547	642	2103	1.54e-41	TraesCS7B01G149200	chr7B	196904882	196908870	Heat shock protein 90
	TRINITY_DN21487_c0_g1	5.46695	4.55e-26	9.61e-24	UP	TRINITY_DN21487_c0_g1	TraesCS1B01G434000.1	1078	1182	1530	1.93e-48	TraesCS1B01G434000	chr1B	658526737	658531782	Aspartic proteinase
	TRINITY_DN16897_c0_g1	7.17941	4.88e-26	1.03e-23	UP	TRINITY_DN16897_c0_g1	TraesCS7D01G390200.1	1	591	591	0	TraesCS7D01G390200	chr7D	505589148	505589738	TMV response-related protein
	TRINITY_DN11640_c0_g1	11.7221	5.07e-26	1.06e-23	UP	NA	NA	NA	NA	NA	NA	NA	NA	NA	NA	NA
	TRINITY_DN10878_c1_g3	14.7706	5.36e-26	1.12e-23	UP	NA	NA	NA	NA	NA	NA	NA	NA	NA	NA	NA
	TRINITY_DN5245_c2_g2	11.5863	5.84e-26	1.21e-23	UP	NA	NA	NA	NA	NA	NA	NA	NA	NA	NA	NA
	TRINITY_DN8076_c1_g1	8.64193	6.25e-26	1.29e-23	UP	TRINITY_DN8076_c1_g1	TraesCS4A01G466400.1	1	1099	1146	0	TraesCS4A01G466400	chr4A	729236778	729237923	F-box protein
	TRINITY_DN54480_c0_g3	11.2515	6.97e-26	1.44e-23	UP	TRINITY_DN54480_c0_g3	TraesCS2A01G524900.1	771	564	1239	5.35e-81	TraesCS2A01G524900	chr2A	745426103	745427424	Anthocyanin 5-aromatic acyltransferase
	TRINITY_DN2891_c0_g1	6.65971	8.16e-26	1.68e-23	UP	TRINITY_DN2891_c0_g1	TraesCS6A01G181700.1	1	793	795	0	TraesCS6A01G181700	chr6A	208383858	208384740	Heat shock protein
	TRINITY_DN2883_c0_g1	5.68325	9.3e-26	1.9e-23	UP	TRINITY_DN2883_c0_g1	TraesCS7A01G159500.1	340	651	651	3.99e-161	TraesCS7A01G159500	chr7A	115867523	115868629	Chaperone protein dnaJ
	TRINITY_DN22480_c0_g1	12.8524	9.82e-26	2.01e-23	UP	NA	NA	NA	NA	NA	NA	NA	NA	NA	NA	NA
	TRINITY_DN250130_c0_g1	9.18646	9.85e-26	2.01e-23	UP	TRINITY_DN250130_c0_g1	TraesCS2A01G237300.1	532	424	2583	7.91e-50	TraesCS2A01G237300	chr2A	310385021	310424952	Endoplasmic reticulum metallopeptidase 1
	TRINITY_DN2223_c1_g2	11.8931	9.87e-26	2.01e-23	UP	NA	NA	NA	NA	NA	NA	NA	NA	NA	NA	NA
	TRINITY_DN18335_c0_g1	11.2863	1.05e-25	2.13e-23	UP	TRINITY_DN18335_c0_g1	TraesCS2A01G429800.1	1984	1635	2310	3.44e-173	TraesCS2A01G429800	chr2A	683012086	683014787	Pre-mRNA-splicing factor CWC21
	TRINITY_DN3936_c1_g1	6.46292	1.09e-25	2.21e-23	UP	NA	NA	NA	NA	NA	NA	NA	NA	NA	NA	NA
	TRINITY_DN225459_c0_g1	8.09366	1.18e-25	2.39e-23	UP	NA	NA	NA	NA	NA	NA	NA	NA	NA	NA	NA
	TRINITY_DN4200_c0_g2	12.9606	1.19e-25	2.4e-23	UP	TRINITY_DN4200_c0_g2	TraesCS7D01G413500.1	588	483	588	2.39e-49	TraesCS7D01G413500	chr7D	531827089	531828040	6,7-dimethyl-8-ribityllumazine synthase
	TRINITY_DN312_c0_g4	6.78479	1.35e-25	2.72e-23	UP	NA	NA	NA	NA	NA	NA	NA	NA	NA	NA	NA
	TRINITY_DN26873_c0_g4	5.35289	1.4e-25	2.81e-23	UP	TRINITY_DN26873_c0_g4	TraesCS2B01G531300.1	1	426	531	0	TraesCS2B01G531300	chr2B	726684952	726686605	Heat-shock protein, putative
	TRINITY_DN66885_c0_g1	5.59962	1.5e-25	3e-23	UP	TRINITY_DN66885_c0_g1	TraesCS7D01G419400.1	401	489	864	2.76e-38	TraesCS7D01G419400	chr7D	538817802	538818855	Xyloglucan endotransglucosylase/hydrolase
	TRINITY_DN14168_c0_g1	6.19188	1.57e-25	3.14e-23	UP	TRINITY_DN14168_c0_g1	TraesCS4B01G212300.1	1	333	468	3.16e-150	TraesCS4B01G212300	chr4B	450685882	450686349	Heat-shock protein, putative
	TRINITY_DN35098_c0_g1	9.12255	1.62e-25	3.23e-23	UP	NA	NA	NA	NA	NA	NA	NA	NA	NA	NA	NA
	TRINITY_DN91153_c0_g1	13.5807	1.72e-25	3.42e-23	UP	NA	NA	NA	NA	NA	NA	NA	NA	NA	NA	NA
	TRINITY_DN485_c0_g2	11.3642	1.77e-25	3.51e-23	UP	TRINITY_DN485_c0_g2	TraesCS2A01G360000.1	417	356	480	4.31e-16	TraesCS2A01G360000	chr2A	603855754	603856938	Cysteine-rich receptor-like protein kinase 41
	TRINITY_DN80927_c0_g1	15.2603	1.83e-25	3.61e-23	UP	NA	NA	NA	NA	NA	NA	NA	NA	NA	NA	NA
	TRINITY_DN30496_c0_g1	5.06366	1.84e-25	3.63e-23	UP	NA	NA	NA	NA	NA	NA	NA	NA	NA	NA	NA
	TRINITY_DN54548_c1_g1	12.6814	2.03e-25	3.99e-23	UP	NA	NA	NA	NA	NA	NA	NA	NA	NA	NA	NA
	TRINITY_DN13003_c2_g1	9.59325	2.06e-25	4.04e-23	UP	NA	NA	NA	NA	NA	NA	NA	NA	NA	NA	NA
	TRINITY_DN9550_c2_g1	11.2093	2.06e-25	4.04e-23	UP	NA	NA	NA	NA	NA	NA	NA	NA	NA	NA	NA
	TRINITY_DN3660_c0_g1	5.51657	2.12e-25	4.15e-23	UP	TRINITY_DN3660_c0_g1	TraesCS7B01G259000.1	1	471	471	0	TraesCS7B01G259000	chr7B	479529985	479530455	Multiprotein-bridging factor, putative
	TRINITY_DN11974_c0_g1	7.69585	2.14e-25	4.17e-23	UP	TRINITY_DN11974_c0_g1	TraesCS3B01G390700.1	1818	1426	1959	0	TraesCS3B01G390700	chr3B	615748962	615751502	70 kDa heat shock protein
	TRINITY_DN27062_c1_g1	5.88164	2.91e-25	5.62e-23	UP	TRINITY_DN27062_c1_g1	TraesCS1D01G086500.1	1	228	228	3.7e-110	TraesCS1D01G086500	chr1D	70892211	70892770	mitogen-activated protein kinase kinase kinase 3
	TRINITY_DN163510_c1_g1	7.29934	3.09e-25	5.95e-23	UP	NA	NA	NA	NA	NA	NA	NA	NA	NA	NA	NA
	TRINITY_DN2490_c0_g2	6.21694	3.13e-25	6e-23	UP	TRINITY_DN2490_c0_g2	TraesCS1B01G294300.1	146	211	1947	5.41e-27	TraesCS1B01G294300	chr1B	512172902	512175830	70 kDa heat shock protein
	TRINITY_DN2867_c0_g1	7.20462	3.51e-25	6.72e-23	UP	TRINITY_DN2867_c0_g1	TraesCS2A01G532500.1	1	438	438	5.95e-155	TraesCS2A01G532500	chr2A	748824880	748825317	Wound-responsive family protein
	TRINITY_DN6541_c1_g1	8.42836	3.53e-25	6.73e-23	UP	TRINITY_DN6541_c1_g1	TraesCS4B01G038900.1	1	265	1149	1.12e-137	TraesCS4B01G038900	chr4B	27865711	27867090	Pre-mRNA-splicing factor 18
	TRINITY_DN99715_c0_g1	12.1814	3.67e-25	6.99e-23	UP	NA	NA	NA	NA	NA	NA	NA	NA	NA	NA	NA
	TRINITY_DN51512_c0_g1	11.3525	3.77e-25	7.17e-23	UP	TRINITY_DN51512_c0_g1	TraesCS7A01G011700.2	3267	3447	3447	7.09e-84	TraesCS7A01G011700	chr7A	5077922	5086332	Acetyl-coenzyme A synthetase
	TRINITY_DN31617_c0_g1	4.79949	4.05e-25	7.63e-23	UP	TRINITY_DN31617_c0_g1	TraesCS5B01G428000.1	394	464	1266	5.71e-30	TraesCS5B01G428000	chr5B	603954037	603956423	Chaperone protein dnaJ, putative
	TRINITY_DN27279_c0_g2	6.72383	4.32e-25	8.13e-23	UP	TRINITY_DN27279_c0_g2	TraesCS1D01G342100.1	2757	2514	2757	1.34e-122	TraesCS1D01G342100	chr1D	431826446	431829513	ATP-dependent chaperone ClpB
	TRINITY_DN6085_c0_g1	12.0208	4.93e-25	9.27e-23	UP	NA	NA	NA	NA	NA	NA	NA	NA	NA	NA	NA
	TRINITY_DN8666_c0_g1	5.8869	5.17e-25	9.7e-23	UP	TRINITY_DN8666_c0_g1	TraesCS2A01G386800.1	7	1734	1734	0	TraesCS2A01G386800	chr2A	632604588	632607489	Hsp70-Hsp90 organizing protein 1
	TRINITY_DN33977_c0_g1	8.08236	6.28e-25	1.17e-22	UP	NA	NA	NA	NA	NA	NA	NA	NA	NA	NA	NA
	TRINITY_DN16590_c1_g1	4.84149	6.43e-25	1.2e-22	UP	TRINITY_DN16590_c1_g1	TraesCS7D01G443100.1	48	196	690	1.15e-53	TraesCS7D01G443100	chr7D	562401777	562425958	Polyubiquitin
	TRINITY_DN66043_c0_g2	6.88362	7.23e-25	1.34e-22	UP	TRINITY_DN66043_c0_g2	TraesCS3B01G515100.1	16	317	1230	3.54e-153	TraesCS3B01G515100	chr3B	757708041	757709406	Basic 7S globulin
	TRINITY_DN71123_c0_g2	11.1334	7.32e-25	1.35e-22	UP	NA	NA	NA	NA	NA	NA	NA	NA	NA	NA	NA
	TRINITY_DN3772_c2_g1	11.6994	7.75e-25	1.42e-22	UP	TRINITY_DN3772_c2_g1	TraesCS1B01G473900.1	94	358	360	1.33e-132	TraesCS1B01G473900	chr1B	681847664	681850883	Acetyl-CoA:benzylalcohol acetyltranferase
	TRINITY_DN201730_c0_g1	8.41339	8.12e-25	1.49e-22	UP	NA	NA	NA	NA	NA	NA	NA	NA	NA	NA	NA
	TRINITY_DN7472_c0_g2	9.28546	8.67e-25	1.58e-22	UP	NA	NA	NA	NA	NA	NA	NA	NA	NA	NA	NA
	TRINITY_DN16065_c0_g3	7.26705	8.72e-25	1.59e-22	UP	TRINITY_DN16065_c0_g3	TraesCS3A01G113200.1	293	1	1317	4.8e-152	TraesCS3A01G113200	chr3A	80414465	80419020	Polynucleotide 5'-hydroxyl-kinase NOL9
	TRINITY_DN8021_c1_g1	11.6656	8.89e-25	1.62e-22	UP	NA	NA	NA	NA	NA	NA	NA	NA	NA	NA	NA
	TRINITY_DN11388_c1_g1	11.2502	8.96e-25	1.63e-22	UP	NA	NA	NA	NA	NA	NA	NA	NA	NA	NA	NA
	TRINITY_DN16590_c0_g1	8.60605	9.01e-25	1.63e-22	UP	NA	NA	NA	NA	NA	NA	NA	NA	NA	NA	NA
	TRINITY_DN288_c0_g3	4.9396	9.17e-25	1.66e-22	UP	NA	NA	NA	NA	NA	NA	NA	NA	NA	NA	NA
	TRINITY_DN1092_c3_g2	8.94891	9.36e-25	1.69e-22	UP	TRINITY_DN1092_c3_g2	TraesCS7D01G392100.1	164	973	1107	0	TraesCS7D01G392100	chr7D	506901196	506904810	Cinnamoyl-CoA reductase 4
	TRINITY_DN46963_c0_g1	11.7205	9.41e-25	1.69e-22	UP	TRINITY_DN46963_c0_g1	TraesCS7B01G093300.3	2149	2059	2784	4.35e-41	TraesCS7B01G093300	chr7B	106945174	106949546	Pentatricopeptide repeat-containing protein
	TRINITY_DN5165_c0_g1	6.17349	9.65e-25	1.73e-22	UP	TRINITY_DN5165_c0_g1	TraesCS6B01G410100.1	1	882	882	0	TraesCS6B01G410100	chr6B	684385993	684388823	Methyltransferase-like protein
	TRINITY_DN4123_c1_g3	12.5262	9.76e-25	1.75e-22	UP	TRINITY_DN4123_c1_g3	TraesCS6D01G359100.1	1	321	3207	1.7e-150	TraesCS6D01G359100	chr6D	451760853	451764265	Receptor-kinase, putative
	TRINITY_DN622_c0_g1	10.2655	1.02e-24	1.83e-22	UP	NA	NA	NA	NA	NA	NA	NA	NA	NA	NA	NA
	TRINITY_DN22110_c0_g1	11.7633	1.08e-24	1.93e-22	UP	TRINITY_DN22110_c0_g1	TraesCS2B01G053200.1	61	906	906	0	TraesCS2B01G053200	chr2B	26135642	26136547	Acidic chitinase
	TRINITY_DN94651_c0_g2	11.1403	1.08e-24	1.93e-22	UP	NA	NA	NA	NA	NA	NA	NA	NA	NA	NA	NA
	TRINITY_DN12864_c0_g1	9.30504	1.13e-24	2e-22	UP	NA	NA	NA	NA	NA	NA	NA	NA	NA	NA	NA
	TRINITY_DN24635_c1_g2	4.62403	1.15e-24	2.04e-22	UP	TRINITY_DN24635_c1_g2	TraesCS6B01G164700.2	1	70	690	8.92e-29	TraesCS6B01G164700	chr6B	171754698	171805703	Polyubiquitin
	TRINITY_DN32587_c0_g1	11.1251	1.22e-24	2.15e-22	UP	NA	NA	NA	NA	NA	NA	NA	NA	NA	NA	NA
	TRINITY_DN14555_c0_g1	12.1953	1.44e-24	2.54e-22	UP	TRINITY_DN14555_c0_g1	TraesCS6A01G381400.1	877	1038	1038	3.57e-80	TraesCS6A01G381400	chr6A	601146836	601148224	Cinnamoyl CoA reductase
	TRINITY_DN11509_c0_g2	7.83114	1.49e-24	2.62e-22	UP	TRINITY_DN11509_c0_g2	TraesCS4A01G005600.1	951	753	951	8.87e-97	TraesCS4A01G005600	chr4A	3370277	3371723	Ethylene-responsive transcription factor
	TRINITY_DN6728_c1_g2	11.5764	1.52e-24	2.66e-22	UP	TRINITY_DN6728_c1_g2	TraesCS2A01G184500.1	565	972	972	5.13e-135	TraesCS2A01G184500	chr2A	144850046	144852614	Receptor-like protein kinase
	TRINITY_DN15475_c0_g1	6.14182	1.59e-24	2.77e-22	UP	TRINITY_DN15475_c0_g1	TraesCS2D01G276000.1	567	802	1653	2.42e-118	TraesCS2D01G276000	chr2D	345623985	345626820	Peptidylprolyl isomerase
	TRINITY_DN16466_c1_g1	9.82734	1.6e-24	2.8e-22	UP	TRINITY_DN16466_c1_g1	TraesCS4B01G163100.2	1673	1585	2187	1.79e-35	TraesCS4B01G163100	chr4B	330775209	330793055	Protein transport protein SEC23
	TRINITY_DN40437_c0_g1	6.81617	1.62e-24	2.83e-22	UP	TRINITY_DN40437_c0_g1	TraesCS5D01G105900.1	1161	2598	2598	0	TraesCS5D01G105900	chr5D	119706790	119710532	Respiratory burst oxidase, putative, expressed
	TRINITY_DN42289_c0_g1	13.229	1.73e-24	3.02e-22	UP	NA	NA	NA	NA	NA	NA	NA	NA	NA	NA	NA
	TRINITY_DN8666_c0_g2	7.42873	1.8e-24	3.12e-22	UP	TRINITY_DN8666_c0_g2	TraesCS2A01G386800.1	1569	1734	1734	7.1e-79	TraesCS2A01G386800	chr2A	632604588	632607489	Hsp70-Hsp90 organizing protein 1
	TRINITY_DN16136_c0_g1	9.94591	1.8e-24	3.12e-22	UP	TRINITY_DN16136_c0_g1	TraesCS5A01G291900.1	1806	1935	1998	1.64e-48	TraesCS5A01G291900	chr5A	502377516	502382198	Esterase/lipase/thioesterase family protein
	TRINITY_DN15388_c0_g1	11.4766	2.05e-24	3.53e-22	UP	NA	NA	NA	NA	NA	NA	NA	NA	NA	NA	NA
	TRINITY_DN4066_c0_g1	9.52715	2.17e-24	3.74e-22	UP	TRINITY_DN4066_c0_g1	TraesCS5D01G479300.1	1	291	291	3.97e-148	TraesCS5D01G479300	chr5D	517590629	517591231	Wound-induced protease inhibitor
	TRINITY_DN4686_c2_g1	16.0704	2.22e-24	3.82e-22	UP	TRINITY_DN4686_c2_g1	TraesCS7A01G188300.1	2040	1818	2055	1.56e-100	TraesCS7A01G188300	chr7A	144603264	144605405	ATP-dependent zinc metalloprotease FTSH protein
	TRINITY_DN1085_c1_g2	11.5305	2.58e-24	4.4e-22	UP	NA	NA	NA	NA	NA	NA	NA	NA	NA	NA	NA
	TRINITY_DN21684_c0_g1	11.082	2.7e-24	4.61e-22	UP	TRINITY_DN21684_c0_g1	TraesCS2D01G504000.1	937	1273	1818	2.53e-174	TraesCS2D01G504000	chr2D	598714248	598720234	Nuclear pore complex protein NUP1
	TRINITY_DN36949_c3_g1	6.86657	3.06e-24	5.2e-22	UP	NA	NA	NA	NA	NA	NA	NA	NA	NA	NA	NA
	TRINITY_DN54601_c0_g1	7.79902	3.4e-24	5.76e-22	UP	TRINITY_DN54601_c0_g1	TraesCS7A01G453300.1	191	452	915	4.62e-101	TraesCS7A01G453300	chr7A	647305836	647307613	Polyubiquitin protein
	TRINITY_DN89688_c1_g1	11.2691	3.49e-24	5.91e-22	UP	NA	NA	NA	NA	NA	NA	NA	NA	NA	NA	NA
	TRINITY_DN109911_c1_g1	14.046	3.54e-24	5.99e-22	UP	TRINITY_DN109911_c1_g1	TraesCS5A01G149700.1	275	81	426	1.48e-60	TraesCS5A01G149700	chr5A	327575915	327577750	rRNA processing protein-like protein
	TRINITY_DN80660_c0_g1	6.44421	3.84e-24	6.47e-22	UP	TRINITY_DN80660_c0_g1	TraesCS1A01G120100.3	1168	1266	2298	2.47e-45	TraesCS1A01G120100	chr1A	132481070	132485645	70 kDa heat shock protein
	TRINITY_DN2863_c0_g1	6.42071	3.89e-24	6.54e-22	UP	TRINITY_DN2863_c0_g1	TraesCS2B01G531300.1	406	531	531	3.3e-60	TraesCS2B01G531300	chr2B	726684952	726686605	Heat-shock protein, putative
	TRINITY_DN24717_c1_g2	11.1752	3.9e-24	6.54e-22	UP	TRINITY_DN24717_c1_g2	TraesCS2A01G179500.1	380	437	438	3.1e-17	TraesCS2A01G179500	chr2A	138133652	138134089	IgA FC receptor
	TRINITY_DN1162_c0_g2	10.3509	4.11e-24	6.87e-22	UP	NA	NA	NA	NA	NA	NA	NA	NA	NA	NA	NA
	TRINITY_DN6026_c0_g2	11.0418	5.01e-24	8.33e-22	UP	TRINITY_DN6026_c0_g2	TraesCS4B01G228000.1	1223	1284	1416	3.14e-21	TraesCS4B01G228000	chr4B	476854821	476858260	Senescence/dehydration-associated protein-like protein
	TRINITY_DN8393_c6_g1	9.33615	5.18e-24	8.57e-22	UP	TRINITY_DN8393_c6_g1	TraesCS4D01G212500.1	1	214	468	8.07e-108	TraesCS4D01G212500	chr4D	365506981	365507656	Heat-shock protein
	TRINITY_DN23877_c0_g2	11.0633	5.4e-24	8.93e-22	UP	NA	NA	NA	NA	NA	NA	NA	NA	NA	NA	NA
	TRINITY_DN616_c0_g1	8.03889	5.6e-24	9.23e-22	UP	TRINITY_DN616_c0_g1	TraesCS4B01G243400.1	1618	1743	1743	2.53e-60	TraesCS4B01G243400	chr4B	504934572	504936314	Heat shock 70 kDa protein
	TRINITY_DN12984_c1_g2	4.29249	5.95e-24	9.8e-22	UP	TRINITY_DN12984_c1_g2	TraesCS2D01G533200.1	1	118	276	7.43e-56	TraesCS2D01G533200	chr2D	617957700	617957975	Wound-responsive family protein
	TRINITY_DN2854_c0_g1	6.31738	6.18e-24	1.01e-21	UP	TRINITY_DN2854_c0_g1	TraesCS2D01G399000.1	214	915	915	0	TraesCS2D01G399000	chr2D	512042264	512043264	Heat shock transcription factor
	TRINITY_DN38126_c1_g1	7.11227	6.21e-24	1.02e-21	UP	TRINITY_DN38126_c1_g1	TraesCS2A01G593000.1	211	271	1545	1.16e-23	TraesCS2A01G593000	chr2A	779818576	779822302	Pyruvate kinase
	TRINITY_DN1827_c0_g1	5.34897	6.29e-24	1.03e-21	UP	TRINITY_DN1827_c0_g1	TraesCS5B01G272900.1	1	411	681	0	TraesCS5B01G272900	chr5B	458390688	458391604	DBH-like monooxygenase protein 2
	TRINITY_DN10132_c0_g1	5.21369	8e-24	1.3e-21	UP	NA	NA	NA	NA	NA	NA	NA	NA	NA	NA	NA
	TRINITY_DN3019_c0_g1	6.05308	8e-24	1.3e-21	UP	NA	NA	NA	NA	NA	NA	NA	NA	NA	NA	NA
	TRINITY_DN288_c1_g1	4.52899	8.11e-24	1.31e-21	UP	NA	NA	NA	NA	NA	NA	NA	NA	NA	NA	NA
	TRINITY_DN75069_c0_g1	11.8598	8.99e-24	1.45e-21	UP	NA	NA	NA	NA	NA	NA	NA	NA	NA	NA	NA
	TRINITY_DN45074_c0_g1	6.25933	9.01e-24	1.46e-21	UP	TRINITY_DN45074_c0_g1	TraesCS1A01G416700.1	366	1	438	0	TraesCS1A01G416700	chr1A	574938084	574938521	Programmed cell death protein 4
	TRINITY_DN70532_c0_g1	5.71663	9.86e-24	1.58e-21	UP	NA	NA	NA	NA	NA	NA	NA	NA	NA	NA	NA
	TRINITY_DN95788_c0_g1	12.3511	1.03e-23	1.65e-21	UP	TRINITY_DN95788_c0_g1	TraesCS6D01G049100.1	258	319	1998	4.93e-25	TraesCS6D01G049100	chr6D	23832974	23836459	Heat shock 70 kDa protein
	TRINITY_DN1208_c0_g3	11.7097	1.09e-23	1.74e-21	UP	NA	NA	NA	NA	NA	NA	NA	NA	NA	NA	NA
	TRINITY_DN12104_c0_g1	4.62347	1.22e-23	1.95e-21	UP	TRINITY_DN12104_c0_g1	TraesCS3B01G000200.1	1351	1491	1911	7.83e-59	TraesCS3B01G000200	chr3B	218049	221886	Protein EXECUTER 1, chloroplastic
	TRINITY_DN15560_c1_g1	11.1292	1.25e-23	1.99e-21	UP	TRINITY_DN15560_c1_g1	TraesCS2A01G012100.1	1	66	459	7.32e-24	TraesCS2A01G012100	chr2A	4674196	4674654	P-loop containing nucleoside triphosphate hydrolases superfamily protein
	TRINITY_DN34989_c1_g1	9.9266	1.31e-23	2.09e-21	UP	TRINITY_DN34989_c1_g1	TraesCS2A01G312900.1	660	609	660	2.15e-19	TraesCS2A01G312900	chr2A	537456162	537456821	Heat-shock protein, putative
	TRINITY_DN80991_c1_g1	12.0138	1.46e-23	2.31e-21	UP	TRINITY_DN80991_c1_g1	TraesCS2D01G525900.1	268	1	570	3.22e-139	TraesCS2D01G525900	chr2D	614644294	614644951	Early light-induced protein 2, chloroplastic
	TRINITY_DN7048_c1_g1	8.98783	1.47e-23	2.33e-21	UP	TRINITY_DN7048_c1_g1	TraesCS7A01G021700.1	635	2126	3324	0	TraesCS7A01G021700	chr7A	8775286	8780950	Disease resistance protein (NBS-LRR class) family
	TRINITY_DN12551_c0_g1	4.91676	1.62e-23	2.55e-21	UP	TRINITY_DN12551_c0_g1	TraesCS6D01G295500.2	1	648	648	0	TraesCS6D01G295500	chr6D	406334688	406335462	Heat-shock protein, putative
	TRINITY_DN43403_c0_g1	11.0847	1.75e-23	2.75e-21	UP	NA	NA	NA	NA	NA	NA	NA	NA	NA	NA	NA
	TRINITY_DN28095_c3_g1	13.5165	1.85e-23	2.9e-21	UP	NA	NA	NA	NA	NA	NA	NA	NA	NA	NA	NA
	TRINITY_DN89048_c0_g2	5.59853	1.96e-23	3.06e-21	UP	TRINITY_DN89048_c0_g2	TraesCSU01G131300.1	2204	1912	2916	1.35e-151	TraesCSU01G131300	chrUn	110792543	110798430	ATP-dependent chaperone ClpB
	TRINITY_DN13620_c0_g1	5.41989	1.97e-23	3.08e-21	UP	NA	NA	NA	NA	NA	NA	NA	NA	NA	NA	NA
	TRINITY_DN27626_c0_g2	4.93811	1.99e-23	3.1e-21	UP	TRINITY_DN27626_c0_g2	TraesCS4A01G091300.1	143	279	939	7.28e-65	TraesCS4A01G091300	chr4A	97874357	97875989	RNA-binding family protein
	TRINITY_DN10416_c0_g1	7.64561	2.08e-23	3.23e-21	UP	TRINITY_DN10416_c0_g1	TraesCS4D01G085800.1	3089	2782	3438	1.5e-160	TraesCS4D01G085800	chr4D	61128653	61149270	ABC transporter, putative
	TRINITY_DN36792_c0_g1	6.51637	2.33e-23	3.62e-21	UP	TRINITY_DN36792_c0_g1	TraesCS3A01G075900.1	1	279	279	1.07e-130	TraesCS3A01G075900	chr3A	47047981	47048259	Avr9/Cf-9 rapidly elicited protein
	TRINITY_DN17428_c0_g1	11.5067	2.33e-23	3.62e-21	UP	TRINITY_DN17428_c0_g1	TraesCS6D01G043500.1	1684	1770	1770	1.23e-38	TraesCS6D01G043500	chr6D	18012891	18015968	RNA-binding NOB1
	TRINITY_DN50797_c0_g1	11.0635	2.67e-23	4.13e-21	UP	TRINITY_DN50797_c0_g1	TraesCS2A01G071700.1	61	122	888	5.04e-25	TraesCS2A01G071700	chr2A	31911283	31913092	Peroxidase family protein
	TRINITY_DN4686_c0_g1	14.6447	2.94e-23	4.54e-21	UP	TRINITY_DN4686_c0_g1	TraesCS7A01G188300.1	1973	2055	2055	6.36e-36	TraesCS7A01G188300	chr7A	144603264	144605405	ATP-dependent zinc metalloprotease FTSH protein
	TRINITY_DN85526_c0_g2	11.11	3.05e-23	4.7e-21	UP	NA	NA	NA	NA	NA	NA	NA	NA	NA	NA	NA
	TRINITY_DN7148_c3_g1	11.3296	3.45e-23	5.28e-21	UP	NA	NA	NA	NA	NA	NA	NA	NA	NA	NA	NA
	TRINITY_DN85284_c0_g3	4.54689	3.61e-23	5.52e-21	UP	TRINITY_DN85284_c0_g3	TraesCS7D01G367500.1	1	225	750	3.4e-112	TraesCS7D01G367500	chr7D	475375095	475375844	ethylene-responsive transcription factor
	TRINITY_DN164_c1_g1	7.43061	3.66e-23	5.57e-21	UP	TRINITY_DN164_c1_g1	TraesCS2A01G203300.1	722	545	2094	3.1e-88	TraesCS2A01G203300	chr2A	179278800	179298601	Phospholipid-transporting ATPase
	TRINITY_DN13811_c0_g1	10.4284	3.82e-23	5.81e-21	UP	TRINITY_DN13811_c0_g1	TraesCS2B01G152700.1	122	1221	2343	0	TraesCS2B01G152700	chr2B	119629745	119634054	Phosphatidylinositol 4-phosphate 5-kinase 4
	TRINITY_DN17397_c0_g1	7.26258	4.29e-23	6.51e-21	UP	NA	NA	NA	NA	NA	NA	NA	NA	NA	NA	NA
	TRINITY_DN28579_c0_g1	4.91276	4.36e-23	6.61e-21	UP	TRINITY_DN28579_c0_g1	TraesCS2A01G502200.1	84	182	495	1.77e-45	TraesCS2A01G502200	chr2A	729983738	729985530	Universal stress family protein
	TRINITY_DN14447_c3_g1	10.9671	4.4e-23	6.64e-21	UP	NA	NA	NA	NA	NA	NA	NA	NA	NA	NA	NA
	TRINITY_DN8666_c1_g1	13.0628	4.63e-23	6.98e-21	UP	NA	NA	NA	NA	NA	NA	NA	NA	NA	NA	NA
	TRINITY_DN2765_c3_g1	7.1196	4.73e-23	7.12e-21	UP	TRINITY_DN2765_c3_g1	TraesCS1A01G120100.1	1128	1172	1686	7.09e-15	TraesCS1A01G120100	chr1A	132481070	132485645	70 kDa heat shock protein
	TRINITY_DN14997_c0_g1	6.51885	4.92e-23	7.39e-21	UP	TRINITY_DN14997_c0_g1	TraesCS6B01G058300.1	1	50	1998	6.15e-18	TraesCS6B01G058300	chr6B	38763526	38767358	Heat shock 70 kDa protein
	TRINITY_DN14226_c0_g1	5.32549	5.21e-23	7.82e-21	UP	NA	NA	NA	NA	NA	NA	NA	NA	NA	NA	NA
	TRINITY_DN19888_c0_g1	12.6433	5.39e-23	8.04e-21	UP	TRINITY_DN19888_c0_g1	TraesCS3B01G515100.1	1150	1230	1230	1.35e-35	TraesCS3B01G515100	chr3B	757708041	757709406	Basic 7S globulin
	TRINITY_DN57498_c0_g1	11.9267	5.47e-23	8.13e-21	UP	TRINITY_DN57498_c0_g1	TraesCS7D01G088800.1	2	94	393	2.27e-35	TraesCS7D01G088800	chr7D	53711008	53711611	Early nodulin 93
	TRINITY_DN46866_c0_g3	12.4944	5.69e-23	8.42e-21	UP	NA	NA	NA	NA	NA	NA	NA	NA	NA	NA	NA
	TRINITY_DN34031_c0_g1	7.22559	5.75e-23	8.49e-21	UP	TRINITY_DN34031_c0_g1	TraesCS3A01G113100.1	139	480	480	2.35e-160	TraesCS3A01G113100	chr3A	80413047	80413827	Heat shock protein
	TRINITY_DN41806_c0_g3	10.9202	5.8e-23	8.55e-21	UP	TRINITY_DN41806_c0_g3	TraesCS2D01G554600.1	1123	1340	1440	1.05e-96	TraesCS2D01G554600	chr2D	628937260	628938939	F-box family protein
	TRINITY_DN13011_c0_g2	7.29288	5.96e-23	8.76e-21	UP	NA	NA	NA	NA	NA	NA	NA	NA	NA	NA	NA
	TRINITY_DN1894_c1_g1	10.6361	6.15e-23	9.01e-21	UP	TRINITY_DN1894_c1_g1	TraesCS3B01G231000.1	1	1274	1281	0	TraesCS3B01G231000	chr3B	349223274	349224554	Transposon Ty3-I Gag-Pol polyprotein
	TRINITY_DN2320_c0_g1	9.07369	6.17e-23	9.02e-21	UP	NA	NA	NA	NA	NA	NA	NA	NA	NA	NA	NA
	TRINITY_DN1783_c2_g2	10.9824	6.26e-23	9.13e-21	UP	TRINITY_DN1783_c2_g2	TraesCS2D01G534200.1	168	273	273	4.07e-41	TraesCS2D01G534200	chr2D	618132569	618132841	Wound-responsive family protein
	TRINITY_DN45585_c0_g1	10.9579	6.27e-23	9.13e-21	UP	TRINITY_DN45585_c0_g1	TraesCS4A01G455800.1	2318	2663	2736	2.59e-179	TraesCS4A01G455800	chr4A	719164439	719168794	Guanine nucleotide-binding protein subunit alpha-like protein
	TRINITY_DN347_c1_g1	11.9967	6.37e-23	9.26e-21	UP	NA	NA	NA	NA	NA	NA	NA	NA	NA	NA	NA
	TRINITY_DN4010_c2_g1	5.89519	7.26e-23	1.05e-20	UP	TRINITY_DN4010_c2_g1	TraesCS3A01G274500.1	1284	899	1284	0	TraesCS3A01G274500	chr3A	503753941	503755224	syntaxin of plants 73
	TRINITY_DN28467_c0_g1	4.40618	7.33e-23	1.06e-20	UP	TRINITY_DN28467_c0_g1	TraesCS2D01G533200.1	2	276	276	6.09e-135	TraesCS2D01G533200	chr2D	617957700	617957975	Wound-responsive family protein
	TRINITY_DN28119_c0_g1	10.909	7.42e-23	1.07e-20	UP	NA	NA	NA	NA	NA	NA	NA	NA	NA	NA	NA
	TRINITY_DN16574_c0_g1	7.72306	7.98e-23	1.15e-20	UP	TRINITY_DN16574_c0_g1	TraesCS6B01G354400.1	1	59	498	1.74e-21	TraesCS6B01G354400	chr6B	620265033	620265871	Universal stress protein family protein
	TRINITY_DN81932_c1_g1	4.50247	9.07e-23	1.31e-20	UP	NA	NA	NA	NA	NA	NA	NA	NA	NA	NA	NA
	TRINITY_DN4476_c1_g1	6.06075	9.29e-23	1.34e-20	UP	TRINITY_DN4476_c1_g1	TraesCS2D01G110000.1	1	162	600	1.73e-80	TraesCS2D01G110000	chr2D	61021556	61022267	Ethylene-responsive transcription factor
	TRINITY_DN14736_c0_g2	5.26522	9.36e-23	1.34e-20	UP	TRINITY_DN14736_c0_g2	TraesCS7B01G035100.1	1	816	816	0	TraesCS7B01G035100	chr7B	34310629	34312241	Calcium-binding EF-hand
	TRINITY_DN121218_c0_g1	11.4218	9.39e-23	1.35e-20	UP	NA	NA	NA	NA	NA	NA	NA	NA	NA	NA	NA
	TRINITY_DN10046_c1_g1	11.0576	9.96e-23	1.42e-20	UP	TRINITY_DN10046_c1_g1	TraesCS7D01G552200.1	382	507	507	2.58e-60	TraesCS7D01G552200	chr7D	635390045	635390551	4-hydroxy-4-methyl-2-oxoglutarate aldolase
	TRINITY_DN93662_c0_g1	8.602	1.01e-22	1.44e-20	UP	TRINITY_DN93662_c0_g1	TraesCS5A01G548000.2	3936	3673	3936	1.08e-102	TraesCS5A01G548000	chr5A	702165549	702169903	BAG family molecular chaperone regulator 6
	TRINITY_DN16969_c1_g1	11.7729	1.03e-22	1.46e-20	UP	NA	NA	NA	NA	NA	NA	NA	NA	NA	NA	NA
	TRINITY_DN37784_c0_g1	11.8008	1.05e-22	1.49e-20	UP	NA	NA	NA	NA	NA	NA	NA	NA	NA	NA	NA
	TRINITY_DN3101_c0_g1	4.33593	1.07e-22	1.51e-20	UP	NA	NA	NA	NA	NA	NA	NA	NA	NA	NA	NA
	TRINITY_DN27413_c0_g2	5.54868	1.1e-22	1.56e-20	UP	TRINITY_DN27413_c0_g2	TraesCS3A01G408700.1	797	371	1137	4.33e-173	TraesCS3A01G408700	chr3A	653416958	653418172	Acyl-[acyl-carrier-protein] desaturase
	TRINITY_DN9220_c0_g1	7.38035	1.18e-22	1.67e-20	UP	TRINITY_DN9220_c0_g1	TraesCS5D01G270000.1	1	414	414	0	TraesCS5D01G270000	chr5D	373774151	373774564	Calcium-binding EF-hand family protein-like
	TRINITY_DN30854_c0_g1	6.18432	1.2e-22	1.68e-20	UP	TRINITY_DN30854_c0_g1	TraesCS4D01G243000.1	3	79	1746	3.02e-33	TraesCS4D01G243000	chr4D	405764819	405767712	Heat shock 70 kDa protein
	TRINITY_DN32956_c0_g2	5.84236	1.22e-22	1.7e-20	UP	TRINITY_DN32956_c0_g2	TraesCS1A01G379200.1	569	606	705	3.6e-09	TraesCS1A01G379200	chr1A	551479529	551482223	Pre-rRNA-processing protein ESF2
	TRINITY_DN1205_c0_g1	6.84884	1.22e-22	1.71e-20	UP	TRINITY_DN1205_c0_g1	TraesCS5D01G393200.1	993	1134	1134	2.24e-67	TraesCS5D01G393200	chr5D	461439693	461440998	Heat shock transcription factor
	TRINITY_DN22082_c0_g1	7.75293	1.26e-22	1.76e-20	UP	NA	NA	NA	NA	NA	NA	NA	NA	NA	NA	NA
	TRINITY_DN49737_c0_g1	10.9264	1.27e-22	1.78e-20	UP	TRINITY_DN49737_c0_g1	TraesCS3A01G373900.1	284	429	429	1.9e-71	TraesCS3A01G373900	chr3A	623616318	623616746	Ferredoxin
	TRINITY_DN437_c15_g1	6.69184	1.29e-22	1.79e-20	UP	NA	NA	NA	NA	NA	NA	NA	NA	NA	NA	NA
	TRINITY_DN61614_c0_g3	4.4617	1.32e-22	1.84e-20	UP	TRINITY_DN61614_c0_g3	TraesCS6D01G349500.1	537	433	537	6.51e-49	TraesCS6D01G349500	chr6D	447278039	447278902	Serine-rich protein
	TRINITY_DN8599_c0_g1	11.9209	1.38e-22	1.91e-20	UP	NA	NA	NA	NA	NA	NA	NA	NA	NA	NA	NA
	TRINITY_DN26873_c0_g3	4.93983	1.4e-22	1.93e-20	UP	TRINITY_DN26873_c0_g3	TraesCS6B01G346700.1	648	411	648	2.28e-119	TraesCS6B01G346700	chr6B	610808780	610809552	Heat-shock protein, putative
	TRINITY_DN3010_c0_g1	10.8719	1.4e-22	1.93e-20	UP	TRINITY_DN3010_c0_g1	TraesCS4A01G463300.1	2262	2358	2358	1.09e-40	TraesCS4A01G463300	chr4A	727114259	727119033	ATP-dependent zinc metalloprotease FtsH
	TRINITY_DN23458_c0_g1	12.6877	1.45e-22	1.99e-20	UP	NA	NA	NA	NA	NA	NA	NA	NA	NA	NA	NA
	TRINITY_DN16699_c1_g3	10.8783	1.65e-22	2.25e-20	UP	NA	NA	NA	NA	NA	NA	NA	NA	NA	NA	NA
	TRINITY_DN10336_c0_g1	9.00716	1.74e-22	2.36e-20	UP	TRINITY_DN10336_c0_g1	TraesCS2B01G130500.1	344	516	516	3.62e-76	TraesCS2B01G130500	chr2B	97933152	97933921	Universal stress protein
	TRINITY_DN2240_c0_g1	9.36061	1.97e-22	2.67e-20	UP	TRINITY_DN2240_c0_g1	TraesCS4D01G226000.1	259	705	717	0	TraesCS4D01G226000	chr4D	384975222	384976356	Heat shock protein
	TRINITY_DN32022_c0_g1	6.77414	2.02e-22	2.73e-20	UP	TRINITY_DN32022_c0_g1	TraesCS2D01G033200.1	903	526	2133	0	TraesCS2D01G033200	chr2D	12882738	12885228	Heat shock protein 90
	TRINITY_DN17312_c0_g2	10.8671	2.07e-22	2.79e-20	UP	NA	NA	NA	NA	NA	NA	NA	NA	NA	NA	NA
	TRINITY_DN9151_c0_g1	10.8488	2.17e-22	2.92e-20	UP	NA	NA	NA	NA	NA	NA	NA	NA	NA	NA	NA
	TRINITY_DN11891_c0_g1	9.20514	2.27e-22	3.05e-20	UP	TRINITY_DN11891_c0_g1	TraesCS1B01G324100.1	381	548	747	6.42e-58	TraesCS1B01G324100	chr1B	549765757	549766589	Nucleotide-diphospho-sugar transferase family protein
	TRINITY_DN15457_c0_g3	10.8536	2.48e-22	3.33e-20	UP	TRINITY_DN15457_c0_g3	TraesCS6B01G203800.1	648	357	687	7.2e-146	TraesCS6B01G203800	chr6B	250792875	250793561	N-alpha-acetyltransferase
	TRINITY_DN37696_c1_g1	5.05921	2.85e-22	3.81e-20	UP	NA	NA	NA	NA	NA	NA	NA	NA	NA	NA	NA
	TRINITY_DN72090_c0_g1	10.8851	2.94e-22	3.93e-20	UP	TRINITY_DN72090_c0_g1	TraesCS6B01G187700.4	693	799	819	1.7e-32	TraesCS6B01G187700	chr6B	215140534	215149007	NADPH--cytochrome P450 reductase
	TRINITY_DN24823_c0_g1	4.56689	2.96e-22	3.94e-20	UP	TRINITY_DN24823_c0_g1	TraesCS4B01G380800.1	2619	2928	2928	5.59e-151	TraesCS4B01G380800	chr4B	660723123	660728928	ATP-dependent chaperone ClpB
	TRINITY_DN50350_c0_g1	7.1216	2.99e-22	3.99e-20	UP	TRINITY_DN50350_c0_g1	TraesCS4B01G295600.1	1	363	363	0	TraesCS4B01G295600	chr4B	581153864	581154226	Polynucleotidyl transferase, ribonuclease H-like superfamily protein
	TRINITY_DN20950_c0_g3	11.072	3.05e-22	4.06e-20	UP	TRINITY_DN20950_c0_g3	TraesCS6B01G206300.1	1	1119	1119	0	TraesCS6B01G206300	chr6B	259086311	259087429	Kelch repeat-containing F-box-like
	TRINITY_DN9013_c1_g1	7.74767	3.11e-22	4.12e-20	UP	TRINITY_DN9013_c1_g1	TraesCS5A01G384100.1	1	271	750	2.78e-137	TraesCS5A01G384100	chr5A	581926267	581927150	Bax inhibitor-1 family protein
	TRINITY_DN1327_c0_g1	8.84572	3.26e-22	4.3e-20	UP	TRINITY_DN1327_c0_g1	TraesCS6A01G179100.1	1	462	462	0	TraesCS6A01G179100	chr6A	201349420	201349881	H -ATPase 9
	TRINITY_DN9310_c2_g1	10.9362	3.35e-22	4.41e-20	UP	NA	NA	NA	NA	NA	NA	NA	NA	NA	NA	NA
	TRINITY_DN15639_c0_g1	4.41112	3.54e-22	4.65e-20	UP	TRINITY_DN15639_c0_g1	TraesCS3D01G512300.2	1	951	951	0	TraesCS3D01G512300	chr3D	596889952	596891598	Beta-1,3-glucanase
	TRINITY_DN249790_c0_g1	14.7267	3.58e-22	4.7e-20	UP	NA	NA	NA	NA	NA	NA	NA	NA	NA	NA	NA
	TRINITY_DN50350_c0_g2	10.8236	3.62e-22	4.74e-20	UP	NA	NA	NA	NA	NA	NA	NA	NA	NA	NA	NA
	TRINITY_DN155701_c0_g1	11.3184	3.76e-22	4.91e-20	UP	NA	NA	NA	NA	NA	NA	NA	NA	NA	NA	NA
	TRINITY_DN59338_c0_g2	6.36464	3.82e-22	4.99e-20	UP	TRINITY_DN59338_c0_g2	TraesCS7A01G161000.1	422	494	744	1.16e-21	TraesCS7A01G161000	chr7A	117346258	117347900	10 kDa chaperonin
	TRINITY_DN71584_c0_g3	10.9188	4e-22	5.2e-20	UP	TRINITY_DN71584_c0_g3	TraesCS6D01G308900.1	547	768	969	6.42e-99	TraesCS6D01G308900	chr6D	419657315	419658473	WAT1-related protein
	TRINITY_DN2534_c1_g1	8.96214	4.31e-22	5.61e-20	UP	NA	NA	NA	NA	NA	NA	NA	NA	NA	NA	NA
	TRINITY_DN3093_c0_g1	5.43262	4.81e-22	6.22e-20	UP	TRINITY_DN3093_c0_g1	TraesCS1B01G423600.1	46	251	1137	2.11e-103	TraesCS1B01G423600	chr1B	646189334	646191991	Chaperone protein dnaJ
	TRINITY_DN10307_c6_g1	10.9109	4.85e-22	6.26e-20	UP	NA	NA	NA	NA	NA	NA	NA	NA	NA	NA	NA
	TRINITY_DN15633_c1_g1	6.89578	4.86e-22	6.26e-20	UP	TRINITY_DN15633_c1_g1	TraesCS2D01G534500.1	1	249	249	2.13e-128	TraesCS2D01G534500	chr2D	618147782	618148302	Wound-responsive family protein
	TRINITY_DN22904_c0_g1	5.12654	4.97e-22	6.4e-20	UP	TRINITY_DN22904_c0_g1	TraesCS7B01G130900.1	1	208	489	1.09e-92	TraesCS7B01G130900	chr7B	157808553	157809166	Heat-shock protein, putative
	TRINITY_DN10366_c0_g2	5.84597	5.01e-22	6.44e-20	UP	TRINITY_DN10366_c0_g2	TraesCS2A01G401600.1	1	214	888	2.48e-109	TraesCS2A01G401600	chr2A	655218650	655219623	Heat stress transcription factor
	TRINITY_DN8340_c1_g1	6.67812	5.11e-22	6.56e-20	UP	TRINITY_DN8340_c1_g1	TraesCS1A01G051500.1	4	64	528	2.57e-24	TraesCS1A01G051500	chr1A	33019173	33022461	Prostaglandin E synthase 3
	TRINITY_DN15812_c0_g1	12.7478	5.17e-22	6.62e-20	UP	TRINITY_DN15812_c0_g1	TraesCSU01G159400.1	14	240	1590	1.39e-62	TraesCSU01G159400	chrUn	225570864	225573454	F-box protein-like protein
	TRINITY_DN10014_c0_g1	5.74423	5.45e-22	6.98e-20	UP	TRINITY_DN10014_c0_g1	TraesCS4B01G205700.1	226	618	1974	0	TraesCS4B01G205700	chr4B	437949085	437951192	70 kDa heat shock protein
	TRINITY_DN12074_c0_g1	10.8419	5.58e-22	7.14e-20	UP	NA	NA	NA	NA	NA	NA	NA	NA	NA	NA	NA
	TRINITY_DN53595_c0_g1	12.194	5.98e-22	7.61e-20	UP	TRINITY_DN53595_c0_g1	TraesCS1A01G120100.3	1895	1958	2298	5.24e-26	TraesCS1A01G120100	chr1A	132481070	132485645	70 kDa heat shock protein
	TRINITY_DN125715_c0_g1	10.8047	6.35e-22	8.07e-20	UP	TRINITY_DN125715_c0_g1	TraesCS5D01G302800.1	270	340	1554	6.12e-30	TraesCS5D01G302800	chr5D	398782847	398789325	Beta-glucosidase
	TRINITY_DN14758_c1_g1	4.50358	6.48e-22	8.23e-20	UP	TRINITY_DN14758_c1_g1	TraesCS1A01G285000.1	177	1	1845	4.12e-82	TraesCS1A01G285000	chr1A	482335991	482338978	70 kDa heat shock protein
	TRINITY_DN5991_c0_g1	4.00458	6.74e-22	8.54e-20	UP	TRINITY_DN5991_c0_g1	TraesCS3D01G091700.1	1	894	894	0	TraesCS3D01G091700	chr3D	46470900	46471988	LOB domain-containing protein
	TRINITY_DN26873_c0_g1	5.8727	6.82e-22	8.64e-20	UP	TRINITY_DN26873_c0_g1	TraesCS7B01G083500.1	455	701	702	1.64e-127	TraesCS7B01G083500	chr7B	94263847	94264657	Heat-shock protein, putative
	TRINITY_DN30746_c0_g1	6.18808	7.09e-22	8.95e-20	UP	NA	NA	NA	NA	NA	NA	NA	NA	NA	NA	NA
	TRINITY_DN15680_c0_g1	5.86789	7.09e-22	8.95e-20	UP	TRINITY_DN15680_c0_g1	TraesCS5B01G336700.1	1	1305	1305	0	TraesCS5B01G336700	chr5B	520046384	520048383	Agmatine coumaroyltransferase-2
	TRINITY_DN64415_c0_g1	13.5594	7.35e-22	9.27e-20	UP	NA	NA	NA	NA	NA	NA	NA	NA	NA	NA	NA
	TRINITY_DN5091_c0_g1	6.11454	7.37e-22	9.28e-20	UP	TRINITY_DN5091_c0_g1	TraesCS7D01G088800.1	1	296	393	7.97e-140	TraesCS7D01G088800	chr7D	53711008	53711611	Early nodulin 93
	TRINITY_DN30172_c0_g2	11.0432	7.59e-22	9.53e-20	UP	TRINITY_DN30172_c0_g2	TraesCS7A01G198200.1	37	133	1530	2.54e-34	TraesCS7A01G198200	chr7A	159477266	159482505	Pyrophosphate--fructose 6-phosphate 1-phosphotransferase subunit beta
	TRINITY_DN81033_c0_g1	10.844	8.12e-22	1.02e-19	UP	TRINITY_DN81033_c0_g1	TraesCS2A01G042100.1	912	1071	1071	8.78e-61	TraesCS2A01G042100	chr2A	16881213	16888128	Phosphoglycerate mutase-like protein
	TRINITY_DN18131_c0_g1	6.30047	8.71e-22	1.09e-19	UP	TRINITY_DN18131_c0_g1	TraesCS5B01G192500.1	1	489	489	0	TraesCS5B01G192500	chr5B	347677510	347677998	Chaperone protein DNAj, putative
	TRINITY_DN25606_c1_g1	8.80361	8.78e-22	1.1e-19	UP	NA	NA	NA	NA	NA	NA	NA	NA	NA	NA	NA
	TRINITY_DN13200_c1_g1	5.13463	8.78e-22	1.1e-19	UP	NA	NA	NA	NA	NA	NA	NA	NA	NA	NA	NA
	TRINITY_DN911_c0_g2	5.49094	8.96e-22	1.12e-19	UP	TRINITY_DN911_c0_g2	TraesCS7B01G288100.2	1	289	387	3.76e-149	TraesCS7B01G288100	chr7B	524047175	524048071	senescence-associated family protein (DUF581)
	TRINITY_DN8503_c0_g2	9.43579	9.25e-22	1.15e-19	UP	TRINITY_DN8503_c0_g2	TraesCS5A01G482400.1	99	161	1146	1.37e-25	TraesCS5A01G482400	chr5A	654086402	654090003	Hsp70 nucleotide exchange factor fes1
	TRINITY_DN5472_c1_g3	11.0359	9.7e-22	1.21e-19	UP	NA	NA	NA	NA	NA	NA	NA	NA	NA	NA	NA
	TRINITY_DN11184_c0_g1	8.92859	1.01e-21	1.25e-19	UP	NA	NA	NA	NA	NA	NA	NA	NA	NA	NA	NA
	TRINITY_DN37376_c0_g1	11.1031	1.13e-21	1.4e-19	UP	TRINITY_DN37376_c0_g1	TraesCS4A01G162600.1	1	230	318	3.16e-79	TraesCS4A01G162600	chr4A	358840185	358840615	DNA-directed RNA polymerase subunit beta
	TRINITY_DN11570_c0_g1	11.1073	1.21e-21	1.48e-19	UP	NA	NA	NA	NA	NA	NA	NA	NA	NA	NA	NA
	TRINITY_DN13714_c0_g1	10.8318	1.23e-21	1.51e-19	UP	TRINITY_DN13714_c0_g1	TraesCSU01G039900.1	2501	2722	4290	8.44e-98	TraesCSU01G039900	chrUn	32198491	32207315	Paired amphipathic helix protein Sin3
	TRINITY_DN13566_c0_g1	6.37649	1.26e-21	1.54e-19	UP	TRINITY_DN13566_c0_g1	TraesCS4B01G382700.1	256	477	2439	8.74e-73	TraesCS4B01G382700	chr4B	662144758	662148442	BAG family molecular chaperone regulator 6
	TRINITY_DN18406_c1_g2	11.9704	1.29e-21	1.57e-19	UP	NA	NA	NA	NA	NA	NA	NA	NA	NA	NA	NA
	TRINITY_DN14320_c0_g1	10.7831	1.35e-21	1.65e-19	UP	NA	NA	NA	NA	NA	NA	NA	NA	NA	NA	NA
	TRINITY_DN10_c5_g1	11.0432	1.52e-21	1.85e-19	UP	TRINITY_DN10_c5_g1	TraesCS7B01G479100.1	2104	3779	3897	0	TraesCS7B01G479100	chr7B	733797617	733801596	NBS-LRR disease resistance protein-like protein
	TRINITY_DN43642_c0_g2	6.18672	1.53e-21	1.86e-19	UP	TRINITY_DN43642_c0_g2	TraesCS6A01G384300.1	5	98	843	2.54e-39	TraesCS6A01G384300	chr6A	602814931	602816001	PPPDE thiol peptidase family protein, putative
	TRINITY_DN187004_c0_g1	11.0861	1.55e-21	1.87e-19	UP	TRINITY_DN187004_c0_g1	TraesCS5D01G087400.1	323	193	444	2.91e-30	TraesCS5D01G087400	chr5D	92464098	92464541	MLO protein homolog 1
	TRINITY_DN15032_c0_g1	4.53939	1.59e-21	1.92e-19	UP	NA	NA	NA	NA	NA	NA	NA	NA	NA	NA	NA
	TRINITY_DN60320_c1_g6	6.96455	1.61e-21	1.94e-19	UP	TRINITY_DN60320_c1_g6	TraesCS4B01G158000.1	1890	1386	2592	0	TraesCS4B01G158000	chr4B	302849791	302868730	Nuclear cap-binding protein subunit 1
	TRINITY_DN1783_c2_g4	6.3482	1.65e-21	1.98e-19	UP	TRINITY_DN1783_c2_g4	TraesCS2A01G532100.1	67	258	258	3.19e-97	TraesCS2A01G532100	chr2A	748688522	748688779	Wound-responsive family protein
	TRINITY_DN11625_c1_g3	5.61488	1.66e-21	1.99e-19	UP	NA	NA	NA	NA	NA	NA	NA	NA	NA	NA	NA
	TRINITY_DN36887_c4_g1	11.9472	2.11e-21	2.52e-19	UP	NA	NA	NA	NA	NA	NA	NA	NA	NA	NA	NA
	TRINITY_DN2204_c0_g1	4.62981	2.21e-21	2.64e-19	UP	TRINITY_DN2204_c0_g1	TraesCS4D01G209700.1	283	1146	1146	0	TraesCS4D01G209700	chr4D	360953251	360956001	Hsp70 nucleotide exchange factor fes1
	TRINITY_DN401_c0_g1	5.78834	2.24e-21	2.66e-19	UP	TRINITY_DN401_c0_g1	TraesCS2A01G277100.1	728	1397	1749	0	TraesCS2A01G277100	chr2A	458051107	458053940	Peptidylprolyl isomerase
	TRINITY_DN6476_c1_g1	11.4613	2.24e-21	2.66e-19	UP	NA	NA	NA	NA	NA	NA	NA	NA	NA	NA	NA
	TRINITY_DN26266_c0_g1	10.7912	2.3e-21	2.73e-19	UP	TRINITY_DN26266_c0_g1	TraesCS7B01G388700.1	1983	2032	3873	2.49e-13	TraesCS7B01G388700	chr7B	654949049	654953437	BAG family molecular chaperone regulator 6
	TRINITY_DN4243_c1_g2	13.0881	2.33e-21	2.75e-19	UP	NA	NA	NA	NA	NA	NA	NA	NA	NA	NA	NA
	TRINITY_DN56595_c0_g2	10.7703	2.33e-21	2.76e-19	UP	TRINITY_DN56595_c0_g2	TraesCS7D01G548000.1	2310	2236	2310	3.54e-32	TraesCS7D01G548000	chr7D	633602388	633608245	Prolyl oligopeptidase family protein
	TRINITY_DN288_c0_g2	5.51875	2.39e-21	2.82e-19	UP	NA	NA	NA	NA	NA	NA	NA	NA	NA	NA	NA
	TRINITY_DN19933_c0_g1	9.50353	2.88e-21	3.37e-19	UP	TRINITY_DN19933_c0_g1	TraesCS7A01G449300.1	1	367	369	1.97e-119	TraesCS7A01G449300	chr7A	643297089	643297519	6-hydroxynicotinate 3-monooxygenase
	TRINITY_DN38089_c1_g1	13.7805	2.94e-21	3.44e-19	UP	TRINITY_DN38089_c1_g1	TraesCS3B01G101200.1	1168	1273	1917	5.19e-36	TraesCS3B01G101200	chr3B	68348282	68356139	Monocopper oxidase-like protein SKU5
	TRINITY_DN50637_c0_g1	5.78354	3.07e-21	3.58e-19	UP	TRINITY_DN50637_c0_g1	TraesCS4B01G397600.1	794	902	2034	2.87e-49	TraesCS4B01G397600	chr4B	671739110	671743251	Chaperone DnaK
	TRINITY_DN38009_c0_g1	7.19436	3.1e-21	3.61e-19	UP	TRINITY_DN38009_c0_g1	TraesCS6A01G146400.1	986	1053	2976	6.93e-28	TraesCS6A01G146400	chr6A	125479812	125485746	ATP-dependent chaperone ClpB
	TRINITY_DN1078_c0_g1	6.98879	3.13e-21	3.64e-19	UP	TRINITY_DN1078_c0_g1	TraesCS2A01G109100.1	1	768	768	0	TraesCS2A01G109100	chr2A	61292139	61293065	Diaminobutyrate--2-oxoglutarate transaminase
	TRINITY_DN14270_c0_g1	6.26914	3.41e-21	3.95e-19	UP	NA	NA	NA	NA	NA	NA	NA	NA	NA	NA	NA
	TRINITY_DN45379_c2_g1	7.61435	3.42e-21	3.96e-19	UP	NA	NA	NA	NA	NA	NA	NA	NA	NA	NA	NA
	TRINITY_DN2615_c2_g1	13.1273	3.51e-21	4.06e-19	UP	TRINITY_DN2615_c2_g1	TraesCS4A01G492700.1	596	636	675	1.25e-10	TraesCS4A01G492700	chr4A	741588190	741588864	Glutaredoxin family protein, expressed
	TRINITY_DN1600_c0_g1	4.33834	3.56e-21	4.11e-19	UP	TRINITY_DN1600_c0_g1	TraesCS6A01G292300.2	710	545	726	6.59e-80	TraesCS6A01G292300	chr6A	524304843	524312602	AGAMOUS-like MADS-box transcription factor
	TRINITY_DN18113_c0_g2	4.02459	3.64e-21	4.2e-19	UP	TRINITY_DN18113_c0_g2	TraesCS2A01G502200.1	209	299	495	6.68e-41	TraesCS2A01G502200	chr2A	729983738	729985530	Universal stress family protein
	TRINITY_DN19647_c0_g1	7.06438	3.67e-21	4.23e-19	UP	TRINITY_DN19647_c0_g1	TraesCS2D01G033200.1	1320	1773	2133	0	TraesCS2D01G033200	chr2D	12882738	12885228	Heat shock protein 90
	TRINITY_DN63328_c1_g1	13.8766	3.73e-21	4.29e-19	UP	NA	NA	NA	NA	NA	NA	NA	NA	NA	NA	NA
	TRINITY_DN5011_c0_g1	9.27597	3.76e-21	4.32e-19	UP	TRINITY_DN5011_c0_g1	TraesCS3A01G023100.1	186	18	1926	4.65e-47	TraesCS3A01G023100	chr3A	12958314	12961343	Glycosyltransferase
	TRINITY_DN129674_c0_g1	10.718	3.77e-21	4.33e-19	UP	NA	NA	NA	NA	NA	NA	NA	NA	NA	NA	NA
	TRINITY_DN19297_c0_g1	8.18945	4.34e-21	4.96e-19	UP	NA	NA	NA	NA	NA	NA	NA	NA	NA	NA	NA
	TRINITY_DN13404_c0_g1	12.7349	4.36e-21	4.98e-19	UP	NA	NA	NA	NA	NA	NA	NA	NA	NA	NA	NA
	TRINITY_DN437_c1_g1	8.31669	4.44e-21	5.07e-19	UP	TRINITY_DN437_c1_g1	TraesCS3D01G351900.1	214	615	1959	0	TraesCS3D01G351900	chr3D	462850049	462852773	70 kDa heat shock protein
	TRINITY_DN16593_c0_g1	12.5774	4.49e-21	5.11e-19	UP	NA	NA	NA	NA	NA	NA	NA	NA	NA	NA	NA
	TRINITY_DN36908_c2_g1	12.5066	4.5e-21	5.11e-19	UP	TRINITY_DN36908_c2_g1	TraesCS3B01G048600.1	1	465	465	0	TraesCS3B01G048600	chr3B	24558810	24559419	Heat shock protein
	TRINITY_DN143560_c0_g1	11.1615	4.57e-21	5.19e-19	UP	TRINITY_DN143560_c0_g1	TraesCS6B01G187500.2	202	283	1206	9.06e-33	TraesCS6B01G187500	chr6B	214025798	214028666	Phosphoglycerate kinase
	TRINITY_DN3422_c1_g1	5.09135	4.67e-21	5.29e-19	UP	TRINITY_DN3422_c1_g1	TraesCS1A01G285000.1	1682	1845	1845	9.62e-81	TraesCS1A01G285000	chr1A	482335991	482338978	70 kDa heat shock protein
	TRINITY_DN38144_c0_g1	5.5565	4.68e-21	5.3e-19	UP	TRINITY_DN38144_c0_g1	TraesCS4D01G016500.1	362	992	1212	0	TraesCS4D01G016500	chr4D	7418933	7421443	Acetyltransferase, GNAT family protein, expressed
	TRINITY_DN8323_c1_g1	10.6886	4.74e-21	5.36e-19	UP	TRINITY_DN8323_c1_g1	TraesCS2A01G532400.1	185	273	273	1.14e-36	TraesCS2A01G532400	chr2A	748776021	748776293	Wound-responsive family protein
	TRINITY_DN7547_c0_g1	4.73225	4.76e-21	5.38e-19	UP	TRINITY_DN7547_c0_g1	TraesCS1A01G317200.1	636	697	933	1.73e-24	TraesCS1A01G317200	chr1A	508641117	508642831	DCD (Development and cell death) domain protein
	TRINITY_DN26298_c0_g2	10.745	4.9e-21	5.52e-19	UP	NA	NA	NA	NA	NA	NA	NA	NA	NA	NA	NA
	TRINITY_DN1716_c0_g2	12.5117	5.17e-21	5.81e-19	UP	TRINITY_DN1716_c0_g2	TraesCS2D01G121400.1	395	138	1146	8.79e-29	TraesCS2D01G121400	chr2D	70623057	70625575	CONSTANS-like zinc finger protein
	TRINITY_DN74957_c0_g1	5.72904	5.33e-21	5.99e-19	UP	NA	NA	NA	NA	NA	NA	NA	NA	NA	NA	NA
	TRINITY_DN835_c0_g1	8.57506	5.4e-21	6.06e-19	UP	TRINITY_DN835_c0_g1	TraesCS4D01G213100.1	1	156	474	3.87e-57	TraesCS4D01G213100	chr4D	365864520	365864993	Heat-shock protein, putative
	TRINITY_DN5223_c0_g1	7.32928	5.49e-21	6.15e-19	UP	NA	NA	NA	NA	NA	NA	NA	NA	NA	NA	NA
	TRINITY_DN70937_c0_g1	5.93248	5.64e-21	6.31e-19	UP	TRINITY_DN70937_c0_g1	TraesCS1A01G340100.1	1	50	2757	3.84e-18	TraesCS1A01G340100	chr1A	530257362	530260422	ATP-dependent chaperone ClpB
	TRINITY_DN94474_c0_g1	5.04607	5.98e-21	6.68e-19	UP	TRINITY_DN94474_c0_g1	TraesCS3D01G403800.1	1	96	1149	9.59e-44	TraesCS3D01G403800	chr3D	517811495	517812736	Acyl-[acyl-carrier-protein] desaturase
	TRINITY_DN15524_c1_g1	4.13221	6.18e-21	6.87e-19	UP	NA	NA	NA	NA	NA	NA	NA	NA	NA	NA	NA
	TRINITY_DN11612_c0_g3	13.7685	6.27e-21	6.96e-19	UP	NA	NA	NA	NA	NA	NA	NA	NA	NA	NA	NA
	TRINITY_DN161401_c0_g1	13.7444	6.48e-21	7.19e-19	UP	NA	NA	NA	NA	NA	NA	NA	NA	NA	NA	NA
	TRINITY_DN18513_c0_g1	12.0271	6.68e-21	7.4e-19	UP	TRINITY_DN18513_c0_g1	TraesCS1B01G368400.1	1	298	909	3.05e-149	TraesCS1B01G368400	chr1B	598843666	598844574	Acidic chitinase
	TRINITY_DN3184_c0_g1	8.13984	6.95e-21	7.69e-19	UP	TRINITY_DN3184_c0_g1	TraesCS2A01G464600.1	83	29	2337	1.13e-18	TraesCS2A01G464600	chr2A	709857790	709862891	Disease resistance protein (NBS-LRR class) family
	TRINITY_DN56_c0_g1	5.53616	7e-21	7.73e-19	UP	TRINITY_DN56_c0_g1	TraesCS7B01G083500.1	72	702	702	0	TraesCS7B01G083500	chr7B	94263847	94264657	Heat-shock protein, putative
	TRINITY_DN5322_c0_g1	9.79092	7.26e-21	8.01e-19	UP	TRINITY_DN5322_c0_g1	TraesCS4A01G492700.1	596	636	675	7.69e-11	TraesCS4A01G492700	chr4A	741588190	741588864	Glutaredoxin family protein, expressed
	TRINITY_DN176393_c0_g1	6.29965	7.53e-21	8.3e-19	UP	TRINITY_DN176393_c0_g1	TraesCS3D01G118300.1	1491	1178	1491	7.33e-165	TraesCS3D01G118300	chr3D	72252014	72253630	Transcription factor, putative
	TRINITY_DN74775_c0_g1	4.64218	7.84e-21	8.61e-19	UP	TRINITY_DN74775_c0_g1	TraesCS4D01G021200.1	215	480	708	2.67e-138	TraesCS4D01G021200	chr4D	9183905	9185152	RING finger protein
	TRINITY_DN10235_c0_g1	4.98378	8.08e-21	8.86e-19	UP	TRINITY_DN10235_c0_g1	TraesCS7A01G355500.1	132	750	750	0	TraesCS7A01G355500	chr7A	520563404	520564446	ethylene-responsive transcription factor
	TRINITY_DN16038_c0_g1	10.9913	8.22e-21	8.99e-19	UP	NA	NA	NA	NA	NA	NA	NA	NA	NA	NA	NA
	TRINITY_DN22129_c0_g1	9.84271	9.04e-21	9.88e-19	UP	NA	NA	NA	NA	NA	NA	NA	NA	NA	NA	NA
	TRINITY_DN61683_c1_g1	14.9721	9.25e-21	1.01e-18	UP	TRINITY_DN61683_c1_g1	TraesCS7B01G329800.1	358	151	558	3.58e-106	TraesCS7B01G329800	chr7B	585461233	585461889	3-oxoacyl-[acyl-carrier-protein] synthase
	TRINITY_DN29075_c0_g1	9.23097	1.02e-20	1.11e-18	UP	NA	NA	NA	NA	NA	NA	NA	NA	NA	NA	NA
	TRINITY_DN90472_c0_g1	9.9589	1.05e-20	1.13e-18	UP	TRINITY_DN90472_c0_g1	TraesCS4A01G452700.1	218	382	1680	2.87e-80	TraesCS4A01G452700	chr4A	717738477	717742320	60 kDa chaperonin
	TRINITY_DN236108_c0_g1	7.82268	1.08e-20	1.16e-18	UP	TRINITY_DN236108_c0_g1	TraesCSU01G126700.1	1	1137	1137	0	TraesCSU01G126700	chrUn	108987394	108992252	CsAtPR5
	TRINITY_DN31096_c3_g1	5.49176	1.18e-20	1.27e-18	UP	NA	NA	NA	NA	NA	NA	NA	NA	NA	NA	NA
	TRINITY_DN38697_c0_g3	7.81434	1.21e-20	1.3e-18	UP	TRINITY_DN38697_c0_g3	TraesCS1D01G153100.1	2789	2678	3486	9.45e-52	TraesCS1D01G153100	chr1D	212501243	212525142	Exportin-4
	TRINITY_DN23320_c0_g1	7.72838	1.21e-20	1.3e-18	UP	TRINITY_DN23320_c0_g1	TraesCS2D01G106000.1	491	1	825	1.09e-113	TraesCS2D01G106000	chr2D	57264904	57265728	Transcription repressor ofp17
	TRINITY_DN9896_c0_g1	4.0422	1.27e-20	1.36e-18	UP	TRINITY_DN9896_c0_g1	TraesCS3D01G157300.1	1	141	210	3.76e-66	TraesCS3D01G157300	chr3D	125482328	125483973	Cx9C motif-containing protein 4, mitochondrial
	TRINITY_DN49285_c0_g1	10.9501	1.29e-20	1.38e-18	UP	TRINITY_DN49285_c0_g1	TraesCS5B01G215200.1	674	714	714	5.17e-11	TraesCS5B01G215200	chr5B	387952531	387953244	glucan synthase-like 10
	TRINITY_DN39073_c0_g1	11.362	1.32e-20	1.41e-18	UP	TRINITY_DN39073_c0_g1	TraesCS1B01G065000.1	508	744	924	3.15e-112	TraesCS1B01G065000	chr1B	49429904	49430827	Acidic chitinase
	TRINITY_DN51598_c0_g1	10.6432	1.33e-20	1.42e-18	UP	TRINITY_DN51598_c0_g1	TraesCSU01G129900.1	552	453	552	2.15e-44	TraesCSU01G129900	chrUn	110521993	110522874	Phosphatidylinositol N-acetylglucosaminyltransferase subunit P
	TRINITY_DN41989_c2_g1	11.1159	1.34e-20	1.43e-18	UP	NA	NA	NA	NA	NA	NA	NA	NA	NA	NA	NA
	TRINITY_DN19185_c0_g3	7.16997	1.36e-20	1.45e-18	UP	TRINITY_DN19185_c0_g3	TraesCS2A01G386800.1	1614	1335	1734	2.18e-139	TraesCS2A01G386800	chr2A	632604588	632607489	Hsp70-Hsp90 organizing protein 1
	TRINITY_DN21777_c0_g1	12.1104	1.46e-20	1.55e-18	UP	TRINITY_DN21777_c0_g1	TraesCS2D01G383600.1	825	879	1719	9.62e-21	TraesCS2D01G383600	chr2D	488217560	488220476	Hsp70-Hsp90 organizing protein 1
	TRINITY_DN103633_c0_g2	7.95979	1.47e-20	1.57e-18	UP	NA	NA	NA	NA	NA	NA	NA	NA	NA	NA	NA
	TRINITY_DN11891_c0_g3	8.84924	1.49e-20	1.58e-18	UP	NA	NA	NA	NA	NA	NA	NA	NA	NA	NA	NA
	TRINITY_DN16483_c2_g1	8.29367	1.52e-20	1.61e-18	UP	TRINITY_DN16483_c2_g1	TraesCS3B01G515100.1	546	853	1230	1.41e-161	TraesCS3B01G515100	chr3B	757708041	757709406	Basic 7S globulin
	TRINITY_DN42570_c0_g1	11.036	1.69e-20	1.78e-18	UP	TRINITY_DN42570_c0_g1	TraesCS2B01G063900.1	666	726	1917	1.79e-24	TraesCS2B01G063900	chr2B	30494613	30499333	Peptidylprolyl isomerase
	TRINITY_DN9623_c0_g2	8.1588	1.81e-20	1.9e-18	UP	TRINITY_DN9623_c0_g2	TraesCS4D01G080700.1	1	278	918	5.69e-144	TraesCS4D01G080700	chr4D	54678122	54683948	ATP-dependent (S)-NAD(P)H-hydrate dehydratase
	TRINITY_DN75874_c0_g1	8.20903	1.83e-20	1.92e-18	UP	NA	NA	NA	NA	NA	NA	NA	NA	NA	NA	NA
	TRINITY_DN16969_c0_g1	6.657	1.83e-20	1.93e-18	UP	TRINITY_DN16969_c0_g1	TraesCS6B01G187700.4	819	682	819	3.43e-43	TraesCS6B01G187700	chr6B	215140534	215149007	NADPH--cytochrome P450 reductase
	TRINITY_DN51682_c0_g1	10.6392	1.94e-20	2.03e-18	UP	NA	NA	NA	NA	NA	NA	NA	NA	NA	NA	NA
	TRINITY_DN15938_c0_g1	4.35864	1.94e-20	2.04e-18	UP	NA	NA	NA	NA	NA	NA	NA	NA	NA	NA	NA
	TRINITY_DN40057_c0_g1	13.6254	2.01e-20	2.11e-18	UP	NA	NA	NA	NA	NA	NA	NA	NA	NA	NA	NA
	TRINITY_DN12803_c1_g2	10.6025	2.28e-20	2.39e-18	UP	NA	NA	NA	NA	NA	NA	NA	NA	NA	NA	NA
	TRINITY_DN61388_c0_g1	7.01221	2.29e-20	2.39e-18	UP	NA	NA	NA	NA	NA	NA	NA	NA	NA	NA	NA
	TRINITY_DN366_c1_g1	11.0808	2.4e-20	2.5e-18	UP	TRINITY_DN366_c1_g1	TraesCS4B01G161800.1	95	213	393	8.08e-36	TraesCS4B01G161800	chr4B	322742498	322752481	Auxin response factor
	TRINITY_DN3496_c0_g1	7.25617	2.43e-20	2.53e-18	UP	NA	NA	NA	NA	NA	NA	NA	NA	NA	NA	NA
	TRINITY_DN25058_c0_g1	6.56061	2.47e-20	2.56e-18	UP	TRINITY_DN25058_c0_g1	TraesCS7A01G202200.1	1	417	417	0	TraesCS7A01G202200	chr7A	163916538	163916954	Heat-shock protein, putative
	TRINITY_DN22898_c0_g1	7.87324	2.63e-20	2.71e-18	UP	NA	NA	NA	NA	NA	NA	NA	NA	NA	NA	NA
	TRINITY_DN1190_c0_g1	6.31569	2.63e-20	2.71e-18	UP	TRINITY_DN1190_c0_g1	TraesCS2A01G109800.1	232	585	585	0	TraesCS2A01G109800	chr2A	61488106	61488797	Ethylene-responsive transcription factor
	TRINITY_DN9202_c0_g3	7.24499	2.67e-20	2.75e-18	UP	TRINITY_DN9202_c0_g3	TraesCS4B01G205700.1	120	1	1974	3.34e-57	TraesCS4B01G205700	chr4B	437949085	437951192	70 kDa heat shock protein
	TRINITY_DN6091_c0_g2	5.124	2.71e-20	2.79e-18	UP	NA	NA	NA	NA	NA	NA	NA	NA	NA	NA	NA
	TRINITY_DN71293_c0_g2	4.55615	2.94e-20	3.01e-18	UP	TRINITY_DN71293_c0_g2	TraesCS5A01G546000.2	129	550	1146	0	TraesCS5A01G546000	chr5A	700445593	700448598	Inner nuclear membrane Man1
	TRINITY_DN28566_c0_g1	10.5983	3.37e-20	3.45e-18	UP	TRINITY_DN28566_c0_g1	TraesCS7A01G033500.1	1808	1596	2727	2.81e-107	TraesCS7A01G033500	chr7A	14730462	14734786	Guanine nucleotide-binding protein subunit alpha-like protein
	TRINITY_DN23962_c0_g1	8.60859	3.81e-20	3.89e-18	UP	NA	NA	NA	NA	NA	NA	NA	NA	NA	NA	NA
	TRINITY_DN223851_c0_g1	12.149	3.88e-20	3.96e-18	UP	NA	NA	NA	NA	NA	NA	NA	NA	NA	NA	NA
	TRINITY_DN15633_c0_g2	8.99328	3.92e-20	3.99e-18	UP	TRINITY_DN15633_c0_g2	TraesCS2B01G331300.1	148	100	570	3.49e-11	TraesCS2B01G331300	chr2B	474909947	474910516	Protein Ycf2
	TRINITY_DN6843_c0_g1	4.2715	3.95e-20	4.01e-18	UP	TRINITY_DN6843_c0_g1	TraesCS5B01G495500.1	948	1146	1146	1.24e-98	TraesCS5B01G495500	chr5B	662976884	662980348	Hsp70 nucleotide exchange factor fes1
	TRINITY_DN54525_c0_g1	5.49754	3.99e-20	4.05e-18	UP	TRINITY_DN54525_c0_g1	TraesCS1B01G423600.1	170	1	1137	1.49e-69	TraesCS1B01G423600	chr1B	646189334	646191991	Chaperone protein dnaJ
	TRINITY_DN40338_c0_g1	6.01451	4.11e-20	4.16e-18	UP	NA	NA	NA	NA	NA	NA	NA	NA	NA	NA	NA
	TRINITY_DN33652_c0_g1	10.5827	4.18e-20	4.23e-18	UP	NA	NA	NA	NA	NA	NA	NA	NA	NA	NA	NA
	TRINITY_DN8569_c0_g1	5.38262	4.26e-20	4.3e-18	UP	TRINITY_DN8569_c0_g1	TraesCS3B01G384800.1	1	557	1377	0	TraesCS3B01G384800	chr3B	605014208	605017449	Carboxypeptidase
	TRINITY_DN528_c0_g1	6.21131	4.5e-20	4.54e-18	UP	TRINITY_DN528_c0_g1	TraesCS2A01G033700.1	1943	2124	2124	5.05e-83	TraesCS2A01G033700	chr2A	15001869	15004471	Heat shock protein 90
	TRINITY_DN3636_c0_g1	4.77094	4.6e-20	4.64e-18	UP	TRINITY_DN3636_c0_g1	TraesCS5A01G063000.1	1	297	297	5.3e-155	TraesCS5A01G063000	chr5A	68550629	68551311	ATP-dependent Clp protease proteolytic subunit
	TRINITY_DN31647_c2_g4	9.72867	4.66e-20	4.68e-18	UP	TRINITY_DN31647_c2_g4	TraesCSU01G149500.1	77	39	909	2.77e-09	TraesCSU01G149500	chrUn	178682261	178683427	CsAtPR5
	TRINITY_DN8138_c0_g3	8.25806	4.69e-20	4.72e-18	UP	TRINITY_DN8138_c0_g3	TraesCS2D01G205300.1	2997	2311	4305	1.24e-86	TraesCS2D01G205300	chr2D	157119913	157124217	Retrovirus-related Pol polyprotein from transposon TNT 1-94
	TRINITY_DN26865_c1_g1	11.3907	5.3e-20	5.3e-18	UP	TRINITY_DN26865_c1_g1	TraesCS7B01G267300.1	341	663	1062	1.47e-166	TraesCS7B01G267300	chr7B	490432075	490433223	Heat shock transcription factor
	TRINITY_DN9789_c0_g1	8.84218	5.32e-20	5.31e-18	UP	TRINITY_DN9789_c0_g1	TraesCS3D01G246500.1	1	529	3375	2.04e-114	TraesCS3D01G246500	chr3D	344338513	344341887	Receptor kinase
	TRINITY_DN10731_c0_g1	11.3815	5.42e-20	5.41e-18	UP	NA	NA	NA	NA	NA	NA	NA	NA	NA	NA	NA
	TRINITY_DN22186_c0_g1	12.93	5.84e-20	5.8e-18	UP	NA	NA	NA	NA	NA	NA	NA	NA	NA	NA	NA
	TRINITY_DN29422_c0_g1	14.2463	5.86e-20	5.81e-18	UP	NA	NA	NA	NA	NA	NA	NA	NA	NA	NA	NA
	TRINITY_DN416_c1_g1	4.72222	5.86e-20	5.81e-18	UP	TRINITY_DN416_c1_g1	TraesCS2D01G162600.1	1	564	564	0	TraesCS2D01G162600	chr2D	106970861	106971424	RING/U-box superfamily protein, putative
	TRINITY_DN100111_c4_g1	10.8785	5.87e-20	5.81e-18	UP	NA	NA	NA	NA	NA	NA	NA	NA	NA	NA	NA
	TRINITY_DN210736_c0_g1	5.79628	5.92e-20	5.86e-18	UP	TRINITY_DN210736_c0_g1	TraesCS4A01G485000.1	181	276	1833	9.94e-44	TraesCS4A01G485000	chr4A	738960964	738964520	Acid invertase 1
	TRINITY_DN57170_c0_g1	10.782	6.06e-20	5.98e-18	UP	NA	NA	NA	NA	NA	NA	NA	NA	NA	NA	NA
	TRINITY_DN30790_c0_g1	4.13812	6.42e-20	6.32e-18	UP	TRINITY_DN30790_c0_g1	TraesCS1A01G316900.1	247	304	348	9.61e-23	TraesCS1A01G316900	chr1A	508527082	508527863	Protein translation factor SUI1-like protein
	TRINITY_DN17820_c3_g1	8.00069	6.44e-20	6.34e-18	UP	NA	NA	NA	NA	NA	NA	NA	NA	NA	NA	NA
	TRINITY_DN10803_c0_g1	5.29094	6.46e-20	6.35e-18	UP	TRINITY_DN10803_c0_g1	TraesCS2A01G386800.1	1	134	1734	4.43e-63	TraesCS2A01G386800	chr2A	632604588	632607489	Hsp70-Hsp90 organizing protein 1
	TRINITY_DN2230_c0_g1	5.70167	6.47e-20	6.36e-18	UP	TRINITY_DN2230_c0_g1	TraesCS1B01G423600.1	131	697	1137	0	TraesCS1B01G423600	chr1B	646189334	646191991	Chaperone protein dnaJ
	TRINITY_DN976_c1_g2	11.2494	6.56e-20	6.44e-18	UP	TRINITY_DN976_c1_g2	TraesCS6B01G420200.1	555	1038	1038	0	TraesCS6B01G420200	chr6B	691782272	691783993	Cinnamoyl CoA reductase
	TRINITY_DN19974_c0_g2	10.5544	6.69e-20	6.54e-18	UP	TRINITY_DN19974_c0_g2	TraesCS7A01G397800.1	429	354	429	1.37e-22	TraesCS7A01G397800	chr7A	576957871	576961268	MADS box transcription factor
	TRINITY_DN5683_c0_g1	5.74657	6.88e-20	6.72e-18	UP	TRINITY_DN5683_c0_g1	TraesCS3A01G116400.1	498	1605	1605	0	TraesCS3A01G116400	chr3A	84649308	84650912	Transcription factor, putative
	TRINITY_DN41296_c0_g1	6.40627	7.18e-20	7.01e-18	UP	TRINITY_DN41296_c0_g1	TraesCS5A01G302700.1	571	653	705	6.35e-34	TraesCS5A01G302700	chr5A	512066955	512067659	Dirigent protein
	TRINITY_DN24416_c0_g1	11.3383	7.21e-20	7.03e-18	UP	TRINITY_DN24416_c0_g1	TraesCS2A01G093200.1	111	1	237	4.98e-42	TraesCS2A01G093200	chr2A	47349311	47349547	Sarcoplasmic/endoplasmic reticulum calcium ATPase 3
	TRINITY_DN5336_c0_g1	8.00165	7.36e-20	7.17e-18	UP	TRINITY_DN5336_c0_g1	TraesCS6A01G040800.1	318	43	324	7.13e-96	TraesCS6A01G040800	chr6A	21161070	21161663	Zinc finger protein VAR3, chloroplastic
	TRINITY_DN6139_c0_g2	8.87177	7.41e-20	7.21e-18	UP	TRINITY_DN6139_c0_g2	TraesCS3D01G351900.1	1752	1959	1959	5.67e-90	TraesCS3D01G351900	chr3D	462850049	462852773	70 kDa heat shock protein
	TRINITY_DN28016_c0_g1	10.5882	7.5e-20	7.28e-18	UP	TRINITY_DN28016_c0_g1	TraesCS5A01G545900.1	555	400	555	5.33e-77	TraesCS5A01G545900	chr5A	700444726	700445401	Phosphatidylinositol N-acetylglucosaminyltransferase subunit P
	TRINITY_DN35707_c0_g5	10.758	7.79e-20	7.55e-18	UP	TRINITY_DN35707_c0_g5	TraesCS7D01G503400.1	1	87	333	6.67e-39	TraesCS7D01G503400	chr7D	608487750	608488082	NHL domain-containing protein, putative
	TRINITY_DN7490_c4_g2	8.21742	8.19e-20	7.93e-18	UP	TRINITY_DN7490_c4_g2	TraesCS5D01G235000.1	361	225	378	8.81e-44	TraesCS5D01G235000	chr5D	342959216	342959593	Glucan endo-1,3-beta-D-glucosidase 35K, vacuolar
	TRINITY_DN45389_c0_g1	9.00687	8.34e-20	8.05e-18	UP	NA	NA	NA	NA	NA	NA	NA	NA	NA	NA	NA
	TRINITY_DN368_c1_g2	12.3163	8.96e-20	8.62e-18	UP	TRINITY_DN368_c1_g2	TraesCS4A01G077900.1	113	162	321	3.88e-18	TraesCS4A01G077900	chr4A	77091071	77096140	NADH-ubiquinone oxidoreductase chain
	TRINITY_DN51283_c0_g2	5.56119	9.03e-20	8.68e-18	UP	TRINITY_DN51283_c0_g2	TraesCS2D01G276000.2	269	1	1764	6.26e-135	TraesCS2D01G276000	chr2D	345623985	345626820	Peptidylprolyl isomerase
	TRINITY_DN48985_c3_g1	10.742	9.1e-20	8.74e-18	UP	NA	NA	NA	NA	NA	NA	NA	NA	NA	NA	NA
	TRINITY_DN17820_c0_g1	7.82538	9.25e-20	8.87e-18	UP	TRINITY_DN17820_c0_g1	TraesCS4B01G163100.2	1262	1117	2187	2.82e-70	TraesCS4B01G163100	chr4B	330775209	330793055	Protein transport protein SEC23
	TRINITY_DN7712_c0_g1	10.9344	9.69e-20	9.28e-18	UP	NA	NA	NA	NA	NA	NA	NA	NA	NA	NA	NA
	TRINITY_DN1608_c3_g1	4.1281	9.98e-20	9.53e-18	UP	TRINITY_DN1608_c3_g1	TraesCS7B01G349000.1	1515	1587	1587	7.42e-31	TraesCS7B01G349000	chr7B	605906778	605909528	Cytochrome P450
	TRINITY_DN51969_c0_g1	4.44231	9.99e-20	9.54e-18	UP	TRINITY_DN51969_c0_g1	TraesCS2A01G532000.1	169	266	267	6.21e-36	TraesCS2A01G532000	chr2A	748685250	748685516	Wound-responsive family protein
	TRINITY_DN12524_c0_g1	4.60943	1.02e-19	9.73e-18	UP	TRINITY_DN12524_c0_g1	TraesCS4A01G202200.1	402	657	1140	9.27e-133	TraesCS4A01G202200	chr4A	491914988	491917720	Alcohol dehydrogenase
	TRINITY_DN3891_c0_g1	4.22881	1.03e-19	9.83e-18	UP	TRINITY_DN3891_c0_g1	TraesCS7B01G262300.1	8	340	387	1.37e-107	TraesCS7B01G262300	chr7B	483328732	483329233	cysteine-rich/transmembrane domain A-like protein
	TRINITY_DN38893_c0_g1	4.56725	1.04e-19	9.86e-18	UP	TRINITY_DN38893_c0_g1	TraesCS7D01G160400.1	499	735	735	3.25e-122	TraesCS7D01G160400	chr7D	110791773	110793394	Chaperone protein dnaJ
	TRINITY_DN19099_c0_g1	11.3908	1.09e-19	1.03e-17	UP	TRINITY_DN19099_c0_g1	TraesCS2A01G203300.1	722	660	2094	1.28e-23	TraesCS2A01G203300	chr2A	179278800	179298601	Phospholipid-transporting ATPase
	TRINITY_DN11409_c0_g1	8.78354	1.1e-19	1.04e-17	UP	TRINITY_DN11409_c0_g1	TraesCS4D01G173900.1	431	1491	1491	0	TraesCS4D01G173900	chr4D	301734059	301737360	Bromodomain containing protein, expressed
	TRINITY_DN10829_c0_g1	10.7123	1.13e-19	1.06e-17	UP	NA	NA	NA	NA	NA	NA	NA	NA	NA	NA	NA
	TRINITY_DN31878_c0_g1	6.33033	1.13e-19	1.06e-17	UP	TRINITY_DN31878_c0_g1	TraesCS5A01G025300.1	719	798	831	1.5e-29	TraesCS5A01G025300	chr5A	19910789	19913367	2-aminoethanethiol dioxygenase
	TRINITY_DN3800_c0_g1	4.30025	1.15e-19	1.08e-17	UP	TRINITY_DN3800_c0_g1	TraesCS5B01G451200.1	1	671	912	0	TraesCS5B01G451200	chr5B	622627647	622631421	OTU domain-containing protein
	TRINITY_DN14681_c0_g3	11.6778	1.16e-19	1.09e-17	UP	TRINITY_DN14681_c0_g3	TraesCS6B01G420000.1	998	1038	1038	3.99e-13	TraesCS6B01G420000	chr6B	691632058	691633453	Cinnamoyl CoA reductase
	TRINITY_DN9374_c1_g1	10.5546	1.24e-19	1.17e-17	UP	TRINITY_DN9374_c1_g1	TraesCS1B01G082300.1	14	101	324	3.41e-32	TraesCS1B01G082300	chr1B	65770974	65772767	Peroxidase
	TRINITY_DN37812_c0_g1	7.89269	1.28e-19	1.2e-17	UP	TRINITY_DN37812_c0_g1	TraesCS6A01G146400.1	1082	1139	2976	2.82e-22	TraesCS6A01G146400	chr6A	125479812	125485746	ATP-dependent chaperone ClpB
	TRINITY_DN49188_c0_g1	10.6224	1.31e-19	1.23e-17	UP	TRINITY_DN49188_c0_g1	TraesCS4A01G023300.1	409	506	705	8.18e-38	TraesCS4A01G023300	chr4A	16501475	16502784	Annexin
	TRINITY_DN30471_c0_g1	6.58068	1.32e-19	1.24e-17	UP	TRINITY_DN30471_c0_g1	TraesCS1B01G139500.1	2214	2294	2499	1.56e-35	TraesCS1B01G139500	chr1B	183478959	183484632	70 kDa heat shock protein
	TRINITY_DN37428_c0_g1	11.4192	1.34e-19	1.25e-17	UP	NA	NA	NA	NA	NA	NA	NA	NA	NA	NA	NA
	TRINITY_DN85568_c1_g1	9.49698	1.4e-19	1.31e-17	UP	TRINITY_DN85568_c1_g1	TraesCS2A01G179500.1	380	436	438	1.84e-19	TraesCS2A01G179500	chr2A	138133652	138134089	IgA FC receptor
	TRINITY_DN56848_c0_g1	10.4981	1.41e-19	1.31e-17	UP	NA	NA	NA	NA	NA	NA	NA	NA	NA	NA	NA
	TRINITY_DN90702_c0_g1	4.04248	1.44e-19	1.34e-17	UP	TRINITY_DN90702_c0_g1	TraesCS5A01G482400.1	254	463	1146	2.5e-105	TraesCS5A01G482400	chr5A	654086402	654090003	Hsp70 nucleotide exchange factor fes1
	TRINITY_DN1326_c0_g2	6.1459	1.5e-19	1.39e-17	UP	TRINITY_DN1326_c0_g2	TraesCS4A01G191600.1	1	405	405	0	TraesCS4A01G191600	chr4A	471929454	471929858	P-loop containing nucleoside triphosphate hydrolases superfamily protein
	TRINITY_DN897_c0_g2	8.85563	1.63e-19	1.51e-17	UP	TRINITY_DN897_c0_g2	TraesCS6D01G390700.1	1	672	672	0	TraesCS6D01G390700	chr6D	465957649	465959722	dyggve-melchior-clausen syndrome protein
	TRINITY_DN13479_c3_g1	10.4874	1.65e-19	1.53e-17	UP	TRINITY_DN13479_c3_g1	TraesCS6B01G005000.1	725	529	735	1.01e-66	TraesCS6B01G005000	chr6B	3870164	3871495	Cell surface glycoprotein 1
	TRINITY_DN34422_c0_g1	7.43059	1.66e-19	1.53e-17	UP	TRINITY_DN34422_c0_g1	TraesCS6B01G002800.1	1	211	519	8.51e-106	TraesCS6B01G002800	chr6B	2167276	2169107	Translationally-controlled tumor
	TRINITY_DN1654_c0_g1	4.56128	1.66e-19	1.53e-17	UP	TRINITY_DN1654_c0_g1	TraesCS4B01G023600.1	1	708	708	0	TraesCS4B01G023600	chr4B	17060390	17062537	E3 ubiquitin-protein ligase
	TRINITY_DN14201_c0_g1	4.99626	1.69e-19	1.56e-17	UP	NA	NA	NA	NA	NA	NA	NA	NA	NA	NA	NA
	TRINITY_DN12998_c0_g1	7.87381	1.72e-19	1.58e-17	UP	TRINITY_DN12998_c0_g1	TraesCS5A01G025300.1	226	764	831	0	TraesCS5A01G025300	chr5A	19910789	19913367	2-aminoethanethiol dioxygenase
	TRINITY_DN14689_c0_g1	4.42727	1.78e-19	1.63e-17	UP	TRINITY_DN14689_c0_g1	TraesCS3A01G073300.1	553	613	762	1.9e-24	TraesCS3A01G073300	chr3A	45570000	45573025	Triosephosphate isomerase
	TRINITY_DN20683_c0_g2	5.01173	1.8e-19	1.65e-17	UP	TRINITY_DN20683_c0_g2	TraesCS5D01G532200.1	350	717	717	1.62e-179	TraesCS5D01G532200	chr5D	547418156	547419160	Erythronate-4-phosphate dehydrogenase family protein, putative
	TRINITY_DN5770_c0_g1	5.8242	1.81e-19	1.66e-17	UP	TRINITY_DN5770_c0_g1	TraesCS7D01G232600.1	129	379	630	5.49e-110	TraesCS7D01G232600	chr7D	194129502	194130250	Heat-shock protein, putative
	TRINITY_DN14559_c1_g1	5.4951	1.82e-19	1.67e-17	UP	TRINITY_DN14559_c1_g1	TraesCS7A01G398900.3	1	764	1596	0	TraesCS7A01G398900	chr7A	578717381	578718976	Cytochrome P450 family cinnamate 4-hydroxylase
	TRINITY_DN4995_c0_g2	10.5382	1.92e-19	1.76e-17	UP	NA	NA	NA	NA	NA	NA	NA	NA	NA	NA	NA
	TRINITY_DN25991_c0_g1	8.3659	2.03e-19	1.85e-17	UP	TRINITY_DN25991_c0_g1	TraesCS3B01G316300.1	1551	1716	1953	1.08e-82	TraesCS3B01G316300	chr3B	507796360	507798528	Cysteine desulfurase
	TRINITY_DN15197_c0_g1	7.25467	2.19e-19	1.99e-17	UP	TRINITY_DN15197_c0_g1	TraesCS6B01G116700.1	117	360	984	1.93e-119	TraesCS6B01G116700	chr6B	103699088	103703161	L-lactate dehydrogenase
	TRINITY_DN26201_c0_g1	10.8118	2.22e-19	2.01e-17	UP	NA	NA	NA	NA	NA	NA	NA	NA	NA	NA	NA
	TRINITY_DN18284_c1_g1	4.19792	2.22e-19	2.02e-17	UP	TRINITY_DN18284_c1_g1	TraesCS7A01G490400.1	116	495	495	0	TraesCS7A01G490400	chr7A	679922333	679923457	Serine/arginine repetitive matrix protein 2, putative isoform 1
	TRINITY_DN31013_c1_g1	11.909	2.29e-19	2.07e-17	UP	NA	NA	NA	NA	NA	NA	NA	NA	NA	NA	NA
	TRINITY_DN31293_c0_g1	5.21644	2.3e-19	2.07e-17	UP	TRINITY_DN31293_c0_g1	TraesCS3A01G073300.1	237	296	762	1.43e-23	TraesCS3A01G073300	chr3A	45570000	45573025	Triosephosphate isomerase
	TRINITY_DN34749_c0_g2	6.94379	2.3e-19	2.08e-17	UP	NA	NA	NA	NA	NA	NA	NA	NA	NA	NA	NA
	TRINITY_DN10242_c0_g1	10.5729	2.52e-19	2.26e-17	UP	TRINITY_DN10242_c0_g1	TraesCS1B01G005100.3	136	971	2733	2.14e-175	TraesCS1B01G005100	chr1B	3171426	3176156	E3 ubiquitin-protein ligase SINA-like 10
	TRINITY_DN25433_c0_g1	10.5061	2.62e-19	2.34e-17	UP	TRINITY_DN25433_c0_g1	TraesCS7A01G563600.1	1	153	540	1.32e-75	TraesCS7A01G563600	chr7A	733569904	733571662	Thioredoxin
	TRINITY_DN268_c0_g1	4.22787	2.65e-19	2.37e-17	UP	TRINITY_DN268_c0_g1	TraesCS7B01G168300.2	268	1125	1125	0	TraesCS7B01G168300	chr7B	235448977	235450208	Heat shock transcription factor
	TRINITY_DN36538_c2_g1	8.61465	3.01e-19	2.68e-17	UP	TRINITY_DN36538_c2_g1	TraesCS2A01G361100.2	894	855	894	1.81e-10	TraesCS2A01G361100	chr2A	605164949	605171281	Disease resistance protein (NBS-LRR class) family
	TRINITY_DN77382_c1_g1	10.4892	3.1e-19	2.76e-17	UP	TRINITY_DN77382_c1_g1	TraesCS5B01G351900.1	1006	1306	1578	1.07e-157	TraesCS5B01G351900	chr5B	531703931	531707697	Serine protease HTRA1
	TRINITY_DN19499_c0_g2	4.29961	3.18e-19	2.82e-17	UP	NA	NA	NA	NA	NA	NA	NA	NA	NA	NA	NA
	TRINITY_DN16642_c1_g1	12.655	3.27e-19	2.89e-17	UP	NA	NA	NA	NA	NA	NA	NA	NA	NA	NA	NA
	TRINITY_DN3852_c2_g1	5.67931	3.3e-19	2.92e-17	UP	TRINITY_DN3852_c2_g1	TraesCS1B01G139500.1	1466	1522	2499	4.72e-17	TraesCS1B01G139500	chr1B	183478959	183484632	70 kDa heat shock protein
	TRINITY_DN30172_c0_g1	7.74372	3.46e-19	3.06e-17	UP	TRINITY_DN30172_c0_g1	TraesCS6B01G444300.1	409	851	1251	0	TraesCS6B01G444300	chr6B	706979375	706992150	Mitochondrial metalloendopeptidase OMA1
	TRINITY_DN5553_c0_g1	10.4547	3.47e-19	3.06e-17	UP	TRINITY_DN5553_c0_g1	TraesCS6D01G014800.1	485	844	1149	3.9e-100	TraesCS6D01G014800	chr6D	6156258	6159148	O-acyltransferase WSD1
	TRINITY_DN22868_c0_g2	10.4784	3.54e-19	3.12e-17	UP	TRINITY_DN22868_c0_g2	TraesCS3D01G007600.1	2733	3322	4071	0	TraesCS3D01G007600	chr3D	2619817	2627172	Paired amphipathic helix protein Sin3
	TRINITY_DN3158_c0_g2	11.3898	3.63e-19	3.19e-17	UP	TRINITY_DN3158_c0_g2	TraesCS7D01G543800.2	279	1	984	6.09e-142	TraesCS7D01G543800	chr7D	632006995	632008533	Chloroplast protein
	TRINITY_DN10336_c0_g4	5.05287	3.73e-19	3.27e-17	UP	TRINITY_DN10336_c0_g4	TraesCS2B01G131200.1	448	543	543	9.34e-42	TraesCS2B01G131200	chr2B	98256232	98257121	Universal stress protein
	TRINITY_DN20334_c0_g1	10.7557	3.79e-19	3.32e-17	UP	TRINITY_DN20334_c0_g1	TraesCS4B01G009800.1	1092	1152	1152	2.76e-22	TraesCS4B01G009800	chr4B	6140156	6141307	Haloacid dehalogenase-like hydrolase superfamily protein
	TRINITY_DN1143_c0_g1	5.60808	4.03e-19	3.52e-17	UP	TRINITY_DN1143_c0_g1	TraesCS7D01G068800.1	1	419	1002	0	TraesCS7D01G068800	chr7D	39514541	39517436	Myeloid leukemia factor 1
	TRINITY_DN84567_c1_g2	10.0512	4.22e-19	3.68e-17	UP	NA	NA	NA	NA	NA	NA	NA	NA	NA	NA	NA
	TRINITY_DN33782_c0_g1	7.23562	4.24e-19	3.69e-17	UP	NA	NA	NA	NA	NA	NA	NA	NA	NA	NA	NA
	TRINITY_DN25934_c1_g2	4.77106	4.28e-19	3.73e-17	UP	TRINITY_DN25934_c1_g2	TraesCS6A01G379800.1	352	151	1344	2.37e-100	TraesCS6A01G379800	chr6A	600403258	600406136	COBRA-like protein
	TRINITY_DN75134_c0_g1	4.0518	4.37e-19	3.8e-17	UP	TRINITY_DN75134_c0_g1	TraesCS6D01G148700.2	925	1152	1287	5.06e-105	TraesCS6D01G148700	chr6D	122253755	122256620	Phosphoglycerate kinase
	TRINITY_DN12136_c0_g1	10.0479	4.45e-19	3.86e-17	UP	TRINITY_DN12136_c0_g1	TraesCS1D01G079400.1	370	174	3189	3.44e-67	TraesCS1D01G079400	chr1D	62110497	62158844	Ankyrin repeat-containing protein
	TRINITY_DN20770_c1_g2	7.60869	4.49e-19	3.88e-17	UP	TRINITY_DN20770_c1_g2	TraesCS2B01G330000.1	1942	1773	2007	6.59e-76	TraesCS2B01G330000	chr2B	474544531	474559673	Copalyl diphosphate synthase
	TRINITY_DN17035_c0_g4	12.2704	4.55e-19	3.93e-17	UP	NA	NA	NA	NA	NA	NA	NA	NA	NA	NA	NA
	TRINITY_DN30139_c0_g2	7.21884	4.6e-19	3.97e-17	UP	NA	NA	NA	NA	NA	NA	NA	NA	NA	NA	NA
	TRINITY_DN2863_c0_g2	4.34849	5.02e-19	4.33e-17	UP	TRINITY_DN2863_c0_g2	TraesCS7D01G179000.1	558	642	642	1.65e-37	TraesCS7D01G179000	chr7D	132135777	132136539	Heat-shock protein, putative
	TRINITY_DN38091_c0_g3	5.27426	5.13e-19	4.42e-17	UP	NA	NA	NA	NA	NA	NA	NA	NA	NA	NA	NA
	TRINITY_DN4675_c1_g2	10.7329	5.15e-19	4.43e-17	UP	NA	NA	NA	NA	NA	NA	NA	NA	NA	NA	NA
	TRINITY_DN14625_c0_g1	5.26382	5.21e-19	4.47e-17	UP	TRINITY_DN14625_c0_g1	TraesCS5B01G249000.1	1330	1455	1614	2.27e-60	TraesCS5B01G249000	chr5B	431074368	431078699	Chaperone protein htpG family protein
	TRINITY_DN6638_c0_g1	11.9072	5.3e-19	4.54e-17	UP	TRINITY_DN6638_c0_g1	TraesCS7D01G189400.1	1	1467	2049	0	TraesCS7D01G189400	chr7D	142610235	142612369	ATP-dependent zinc metalloprotease FTSH protein
	TRINITY_DN20093_c0_g1	5.44129	5.33e-19	4.57e-17	UP	TRINITY_DN20093_c0_g1	TraesCS7B01G063400.1	1	53	2481	5.67e-19	TraesCS7B01G063400	chr7B	68344330	68348404	Sucrose synthase
	TRINITY_DN16606_c2_g1	6.94311	5.64e-19	4.82e-17	UP	NA	NA	NA	NA	NA	NA	NA	NA	NA	NA	NA
	TRINITY_DN20515_c0_g1	7.63988	5.64e-19	4.82e-17	UP	TRINITY_DN20515_c0_g1	TraesCS4D01G243000.1	1123	1465	1746	0	TraesCS4D01G243000	chr4D	405764819	405767712	Heat shock 70 kDa protein
	TRINITY_DN29700_c0_g1	11.5506	5.86e-19	5e-17	UP	NA	NA	NA	NA	NA	NA	NA	NA	NA	NA	NA
	TRINITY_DN83634_c0_g1	6.47823	5.99e-19	5.1e-17	UP	TRINITY_DN83634_c0_g1	TraesCS5B01G260300.1	1	1269	1269	0	TraesCS5B01G260300	chr5B	442825187	442826455	Retrotransposon protein, putative, unclassified
	TRINITY_DN36775_c0_g2	9.16814	6.19e-19	5.27e-17	UP	NA	NA	NA	NA	NA	NA	NA	NA	NA	NA	NA
	TRINITY_DN10984_c0_g3	5.24084	6.27e-19	5.32e-17	UP	TRINITY_DN10984_c0_g3	TraesCS2D01G502700.3	352	423	423	1.21e-29	TraesCS2D01G502700	chr2D	596252301	596254507	Adenine nucleotide alpha hydrolases-like superfamily protein
	TRINITY_DN25690_c1_g1	10.448	6.31e-19	5.36e-17	UP	NA	NA	NA	NA	NA	NA	NA	NA	NA	NA	NA
	TRINITY_DN5441_c1_g1	6.89549	6.52e-19	5.52e-17	UP	TRINITY_DN5441_c1_g1	TraesCSU01G130200.1	1797	966	1797	0	TraesCSU01G130200	chrUn	110528341	110530800	Protein NRT1/ PTR FAMILY 5.1
	TRINITY_DN6637_c0_g1	4.43315	6.75e-19	5.71e-17	UP	TRINITY_DN6637_c0_g1	TraesCS3D01G356500.2	56	1506	1506	0	TraesCS3D01G356500	chr3D	468950458	468954757	Regulator of chromosome condensation (RCC1) family protein
	TRINITY_DN89874_c0_g1	9.56707	6.83e-19	5.77e-17	UP	TRINITY_DN89874_c0_g1	TraesCS3A01G034500.1	78	282	456	1.63e-99	TraesCS3A01G034500	chr3A	19466930	19467666	Heat shock protein
	TRINITY_DN22819_c1_g1	4.85878	7.02e-19	5.92e-17	UP	NA	NA	NA	NA	NA	NA	NA	NA	NA	NA	NA
	TRINITY_DN6267_c0_g1	5.55026	7.09e-19	5.97e-17	UP	TRINITY_DN6267_c0_g1	TraesCS4A01G202200.1	943	1140	1140	1.26e-83	TraesCS4A01G202200	chr4A	491914988	491917720	Alcohol dehydrogenase
	TRINITY_DN7159_c0_g1	9.38341	7.14e-19	6.01e-17	UP	NA	NA	NA	NA	NA	NA	NA	NA	NA	NA	NA
	TRINITY_DN47715_c0_g1	10.7105	7.46e-19	6.27e-17	UP	NA	NA	NA	NA	NA	NA	NA	NA	NA	NA	NA
	TRINITY_DN76294_c1_g1	11.2801	7.54e-19	6.33e-17	UP	NA	NA	NA	NA	NA	NA	NA	NA	NA	NA	NA
	TRINITY_DN16981_c0_g1	7.43469	8.03e-19	6.73e-17	UP	NA	NA	NA	NA	NA	NA	NA	NA	NA	NA	NA
	TRINITY_DN42874_c0_g1	6.14261	8.23e-19	6.88e-17	UP	TRINITY_DN42874_c0_g1	TraesCS4A01G015500.1	169	249	249	2.43e-35	TraesCS4A01G015500	chr4A	9623214	9623462	ARM repeat superfamily protein
	TRINITY_DN10402_c0_g4	10.6475	8.28e-19	6.92e-17	UP	NA	NA	NA	NA	NA	NA	NA	NA	NA	NA	NA
	TRINITY_DN7902_c2_g1	6.97305	8.67e-19	7.24e-17	UP	TRINITY_DN7902_c2_g1	TraesCS3B01G448600.1	812	1113	1113	4.02e-156	TraesCS3B01G448600	chr3B	689162982	689167756	O-methyltransferase
	TRINITY_DN8189_c0_g1	11.1736	8.91e-19	7.44e-17	UP	NA	NA	NA	NA	NA	NA	NA	NA	NA	NA	NA
	TRINITY_DN77435_c1_g1	10.6552	9.02e-19	7.51e-17	UP	TRINITY_DN77435_c1_g1	TraesCS6B01G011800.1	1312	1024	1782	4.9e-136	TraesCS6B01G011800	chr6B	6849093	6853009	60 kDa chaperonin
	TRINITY_DN85894_c0_g1	6.75327	9.08e-19	7.56e-17	UP	NA	NA	NA	NA	NA	NA	NA	NA	NA	NA	NA
	TRINITY_DN19103_c0_g1	9.57649	9.46e-19	7.87e-17	UP	TRINITY_DN19103_c0_g1	TraesCS5A01G224800.1	1	572	660	0	TraesCS5A01G224800	chr5A	439844249	439844908	Cell division control, Cdc6
	TRINITY_DN718_c0_g1	7.52275	9.5e-19	7.89e-17	UP	TRINITY_DN718_c0_g1	TraesCS2B01G624200.1	211	530	1353	1.41e-47	TraesCS2B01G624200	chr2B	797464238	797466192	Glutamyl-tRNA(Gln) amidotransferase subunit A
	TRINITY_DN1271_c1_g3	10.8049	9.65e-19	8e-17	UP	NA	NA	NA	NA	NA	NA	NA	NA	NA	NA	NA
	TRINITY_DN174280_c0_g1	10.3786	9.84e-19	8.15e-17	UP	TRINITY_DN174280_c0_g1	TraesCS6D01G382000.1	1	993	993	0	TraesCS6D01G382000	chr6D	462075974	462077661	5'-3' exonuclease family protein
	TRINITY_DN48238_c0_g1	10.6771	1.04e-18	8.58e-17	UP	NA	NA	NA	NA	NA	NA	NA	NA	NA	NA	NA
	TRINITY_DN7273_c2_g1	6.13207	1.05e-18	8.65e-17	UP	TRINITY_DN7273_c2_g1	TraesCS2B01G561400.1	1	112	267	2.83e-40	TraesCS2B01G561400	chr2B	754004653	754004919	Wound-responsive family protein
	TRINITY_DN6272_c0_g1	4.30775	1.06e-18	8.73e-17	UP	NA	NA	NA	NA	NA	NA	NA	NA	NA	NA	NA
	TRINITY_DN4476_c1_g2	6.48585	1.08e-18	8.88e-17	UP	TRINITY_DN4476_c1_g2	TraesCS2B01G127800.1	1	184	606	1.23e-92	TraesCS2B01G127800	chr2B	95796218	95796941	Ethylene-responsive transcription factor
	TRINITY_DN26392_c0_g1	6.36585	1.16e-18	9.56e-17	UP	TRINITY_DN26392_c0_g1	TraesCS4D01G212400.1	147	477	477	2.49e-167	TraesCS4D01G212400	chr4D	365399007	365399483	Heat-shock protein
	TRINITY_DN12127_c0_g1	3.96893	1.28e-18	1.05e-16	UP	NA	NA	NA	NA	NA	NA	NA	NA	NA	NA	NA
	TRINITY_DN63987_c0_g1	6.3707	1.29e-18	1.05e-16	UP	TRINITY_DN63987_c0_g1	TraesCS2A01G259500.1	390	456	1554	2.49e-25	TraesCS2A01G259500	chr2A	407739441	407742618	Sugar transporter, putative
	TRINITY_DN2404_c1_g3	7.98404	1.3e-18	1.06e-16	UP	TRINITY_DN2404_c1_g3	TraesCS7B01G249000.1	92	143	330	2.53e-18	TraesCS7B01G249000	chr7B	459804080	459804410	Cytochrome b6-f complex subunit 4
	TRINITY_DN90266_c0_g1	10.4954	1.32e-18	1.07e-16	UP	NA	NA	NA	NA	NA	NA	NA	NA	NA	NA	NA
	TRINITY_DN22384_c0_g1	4.96267	1.32e-18	1.07e-16	UP	TRINITY_DN22384_c0_g1	TraesCS2A01G050600.3	1597	1905	1947	6.93e-135	TraesCS2A01G050600	chr2A	19646183	19652126	Peptidylprolyl isomerase
	TRINITY_DN46129_c0_g2	10.3599	1.35e-18	1.09e-16	UP	NA	NA	NA	NA	NA	NA	NA	NA	NA	NA	NA
	TRINITY_DN5142_c0_g2	5.47833	1.41e-18	1.14e-16	UP	TRINITY_DN5142_c0_g2	TraesCS7A01G021700.1	2186	3324	3324	0	TraesCS7A01G021700	chr7A	8775286	8780950	Disease resistance protein (NBS-LRR class) family
	TRINITY_DN6049_c0_g2	8.14861	1.45e-18	1.17e-16	UP	TRINITY_DN6049_c0_g2	TraesCS7A01G341300.1	1750	1810	1980	1.35e-23	TraesCS7A01G341300	chr7A	501069038	501081199	Ufm1-specific protease 2
	TRINITY_DN24500_c0_g1	4.77473	1.48e-18	1.2e-16	UP	TRINITY_DN24500_c0_g1	TraesCS1A01G364000.1	354	675	675	1.38e-160	TraesCS1A01G364000	chr1A	544176582	544177718	Late embryogenesis abundant protein
	TRINITY_DN47433_c0_g1	4.51801	1.49e-18	1.2e-16	UP	TRINITY_DN47433_c0_g1	TraesCS4A01G091300.1	1	37	939	2.32e-09	TraesCS4A01G091300	chr4A	97874357	97875989	RNA-binding family protein
	TRINITY_DN32672_c0_g1	3.6579	1.55e-18	1.25e-16	UP	TRINITY_DN32672_c0_g1	TraesCS2A01G502200.1	431	495	495	1.81e-26	TraesCS2A01G502200	chr2A	729983738	729985530	Universal stress family protein
	TRINITY_DN22471_c0_g1	10.4466	1.57e-18	1.26e-16	UP	NA	NA	NA	NA	NA	NA	NA	NA	NA	NA	NA
	TRINITY_DN24919_c0_g1	10.4466	1.57e-18	1.26e-16	UP	TRINITY_DN24919_c0_g1	TraesCS7D01G468600.1	1397	1446	1446	2.65e-18	TraesCS7D01G468600	chr7D	582115728	582120193	Allantoate amidohydrolase
	TRINITY_DN15095_c1_g1	10.5781	1.58e-18	1.27e-16	UP	TRINITY_DN15095_c1_g1	TraesCS2A01G010200.1	1	142	1233	1.76e-57	TraesCS2A01G010200	chr2A	3964870	3967583	StAR-related lipid transfer protein
	TRINITY_DN19154_c0_g1	10.4078	1.59e-18	1.27e-16	UP	TRINITY_DN19154_c0_g1	TraesCS6B01G080100.1	1256	1315	1323	1.37e-16	TraesCS6B01G080100	chr6B	56200683	56202005	UDP-glycosyltransferase
	TRINITY_DN3766_c1_g2	12.2279	1.59e-18	1.27e-16	UP	TRINITY_DN3766_c1_g2	TraesCS5A01G314600.1	487	270	615	2.25e-103	TraesCS5A01G314600	chr5A	525025891	525026586	Ethylene-responsive transcription factor
	TRINITY_DN18212_c0_g1	8.27261	1.64e-18	1.31e-16	UP	NA	NA	NA	NA	NA	NA	NA	NA	NA	NA	NA
	TRINITY_DN105870_c0_g1	10.3551	1.67e-18	1.33e-16	UP	TRINITY_DN105870_c0_g1	TraesCS1D01G142900.1	444	566	582	9.9e-39	TraesCS1D01G142900	chr1D	198172390	198172971	Ethylene-responsive transcription factor, putative
	TRINITY_DN58791_c0_g1	4.53336	1.7e-18	1.36e-16	UP	TRINITY_DN58791_c0_g1	TraesCS7A01G159500.1	189	1	651	9.29e-94	TraesCS7A01G159500	chr7A	115867523	115868629	Chaperone protein dnaJ
	TRINITY_DN16121_c0_g2	5.02764	1.77e-18	1.41e-16	UP	NA	NA	NA	NA	NA	NA	NA	NA	NA	NA	NA
	TRINITY_DN67165_c0_g1	11.0482	1.79e-18	1.43e-16	UP	TRINITY_DN67165_c0_g1	TraesCS7D01G408200.1	1	702	1011	0	TraesCS7D01G408200	chr7D	526000699	526002687	Atrial natriuretic peptide receptor 2
	TRINITY_DN7376_c0_g1	4.91971	1.82e-18	1.45e-16	UP	TRINITY_DN7376_c0_g1	TraesCS7D01G211700.2	738	1143	1143	0	TraesCS7D01G211700	chr7D	169823996	169825318	ADP,ATP carrier protein, mitochondrial
	TRINITY_DN7594_c0_g2	10.4167	1.85e-18	1.47e-16	UP	NA	NA	NA	NA	NA	NA	NA	NA	NA	NA	NA
	TRINITY_DN13438_c2_g1	6.97697	1.86e-18	1.47e-16	UP	TRINITY_DN13438_c2_g1	TraesCS6A01G083200.1	344	251	744	2e-42	TraesCS6A01G083200	chr6A	51947908	51953052	Bax inhibitor 1-like protein
	TRINITY_DN79255_c0_g1	10.3896	1.88e-18	1.49e-16	UP	TRINITY_DN79255_c0_g1	TraesCS7D01G339600.1	323	531	840	7.77e-93	TraesCS7D01G339600	chr7D	433875900	433876949	Aquaporin
	TRINITY_DN7257_c0_g1	6.32051	1.9e-18	1.5e-16	UP	NA	NA	NA	NA	NA	NA	NA	NA	NA	NA	NA
	TRINITY_DN35700_c0_g1	14.2991	1.91e-18	1.51e-16	UP	NA	NA	NA	NA	NA	NA	NA	NA	NA	NA	NA
	TRINITY_DN288_c3_g2	4.7519	1.99e-18	1.57e-16	UP	NA	NA	NA	NA	NA	NA	NA	NA	NA	NA	NA
	TRINITY_DN43593_c1_g1	7.96416	1.99e-18	1.57e-16	UP	TRINITY_DN43593_c1_g1	TraesCS2A01G269600.1	1	318	318	5.97e-152	TraesCS2A01G269600	chr2A	435641621	435642033	BHLH transcription factor
	TRINITY_DN8367_c0_g2	11.9173	2e-18	1.57e-16	UP	NA	NA	NA	NA	NA	NA	NA	NA	NA	NA	NA
	TRINITY_DN41146_c0_g1	12.7687	2e-18	1.57e-16	UP	TRINITY_DN41146_c0_g1	TraesCS4A01G162600.1	95	308	318	2.24e-78	TraesCS4A01G162600	chr4A	358840185	358840615	DNA-directed RNA polymerase subunit beta
	TRINITY_DN22892_c0_g2	10.727	2.03e-18	1.59e-16	UP	TRINITY_DN22892_c0_g2	TraesCS5A01G548000.3	2517	2575	3933	2.39e-23	TraesCS5A01G548000	chr5A	702165549	702169903	BAG family molecular chaperone regulator 6
	TRINITY_DN19647_c1_g1	6.47966	2.05e-18	1.61e-16	UP	TRINITY_DN19647_c1_g1	TraesCS2D01G033200.1	1976	1761	2133	6.23e-99	TraesCS2D01G033200	chr2D	12882738	12885228	Heat shock protein 90
	TRINITY_DN28158_c0_g1	10.9711	2.1e-18	1.65e-16	UP	TRINITY_DN28158_c0_g1	TraesCS1B01G446500.1	901	1051	1119	2.18e-69	TraesCS1B01G446500	chr1B	666535871	666539275	Kinase family protein
	TRINITY_DN90702_c0_g2	11.6785	2.1e-18	1.65e-16	UP	TRINITY_DN90702_c0_g2	TraesCS5A01G482400.1	202	256	1146	2.69e-19	TraesCS5A01G482400	chr5A	654086402	654090003	Hsp70 nucleotide exchange factor fes1
	TRINITY_DN11918_c1_g1	3.76545	2.16e-18	1.69e-16	UP	TRINITY_DN11918_c1_g1	TraesCS6D01G209600.1	1	583	711	0	TraesCS6D01G209600	chr6D	296200967	296203842	RNA-binding protein
	TRINITY_DN15478_c0_g1	10.3362	2.24e-18	1.75e-16	UP	NA	NA	NA	NA	NA	NA	NA	NA	NA	NA	NA
	TRINITY_DN46592_c0_g3	10.3386	2.26e-18	1.76e-16	UP	TRINITY_DN46592_c0_g3	TraesCS2B01G246300.1	342	121	342	1.44e-39	TraesCS2B01G246300	chr2B	250725322	250725815	Transcription elongation factor 1
	TRINITY_DN5396_c1_g1	13.6132	2.3e-18	1.79e-16	UP	NA	NA	NA	NA	NA	NA	NA	NA	NA	NA	NA
	TRINITY_DN10984_c0_g2	5.2575	2.35e-18	1.83e-16	UP	TRINITY_DN10984_c0_g2	TraesCS2B01G530300.1	358	418	495	1.28e-23	TraesCS2B01G530300	chr2B	725111871	725113818	Universal stress family protein
	TRINITY_DN46544_c0_g1	6.66297	2.41e-18	1.87e-16	UP	TRINITY_DN46544_c0_g1	TraesCS6B01G290500.1	1448	1118	1845	4.83e-61	TraesCS6B01G290500	chr6B	522640089	522643061	Protein NRT1/ PTR FAMILY 5.1
	TRINITY_DN47512_c0_g1	10.1871	2.46e-18	1.9e-16	UP	NA	NA	NA	NA	NA	NA	NA	NA	NA	NA	NA
	TRINITY_DN29985_c0_g1	3.97776	2.46e-18	1.9e-16	UP	TRINITY_DN29985_c0_g1	TraesCS4D01G000500.1	288	574	1788	2.86e-148	TraesCS4D01G000500	chr4D	475554	479835	ABC transporter ATP-binding protein ARB1
	TRINITY_DN23458_c1_g1	8.84232	2.58e-18	2e-16	UP	NA	NA	NA	NA	NA	NA	NA	NA	NA	NA	NA
	TRINITY_DN150042_c0_g1	6.12853	2.65e-18	2.05e-16	UP	TRINITY_DN150042_c0_g1	TraesCS4B01G397600.1	2002	2034	2034	3.77e-08	TraesCS4B01G397600	chr4B	671739110	671743251	Chaperone DnaK
	TRINITY_DN111_c0_g2	5.39176	2.76e-18	2.13e-16	UP	TRINITY_DN111_c0_g2	TraesCS4B01G001000.1	1	1005	1044	0	TraesCS4B01G001000	chr4B	639894	640937	Calcium-dependent lipid-binding domain protein
	TRINITY_DN18837_c0_g1	5.13362	2.86e-18	2.2e-16	UP	TRINITY_DN18837_c0_g1	TraesCS4D01G232700.1	1276	1587	1587	9.94e-159	TraesCS4D01G232700	chr4D	393635789	393637741	Glutamate decarboxylase
	TRINITY_DN2089_c0_g1	4.7494	2.88e-18	2.22e-16	UP	TRINITY_DN2089_c0_g1	TraesCS2B01G130000.1	159	219	312	2.1e-23	TraesCS2B01G130000	chr2B	97394475	97397147	Hypoxia-responsive family protein-like
	TRINITY_DN16356_c0_g1	4.1468	2.9e-18	2.23e-16	UP	TRINITY_DN16356_c0_g1	TraesCS4A01G485000.1	1523	1811	1833	4.83e-146	TraesCS4A01G485000	chr4A	738960964	738964520	Acid invertase 1
	TRINITY_DN18747_c2_g1	10.7682	2.93e-18	2.25e-16	UP	TRINITY_DN18747_c2_g1	TraesCS1B01G325600.1	927	787	927	7.22e-44	TraesCS1B01G325600	chr1B	551218727	551219653	Transposon protein, putative, Mutator sub-class
	TRINITY_DN54610_c0_g1	6.57544	2.98e-18	2.28e-16	UP	TRINITY_DN54610_c0_g1	TraesCS4A01G392700.1	184	1161	1161	0	TraesCS4A01G392700	chr4A	668367845	668370067	aspartate/glutamate/uridylate kinase family protein
	TRINITY_DN6924_c1_g2	10.3272	3.08e-18	2.36e-16	UP	NA	NA	NA	NA	NA	NA	NA	NA	NA	NA	NA
	TRINITY_DN190602_c0_g1	12.2295	3.22e-18	2.47e-16	UP	NA	NA	NA	NA	NA	NA	NA	NA	NA	NA	NA
	TRINITY_DN57782_c0_g1	12.4578	3.5e-18	2.67e-16	UP	NA	NA	NA	NA	NA	NA	NA	NA	NA	NA	NA
	TRINITY_DN202324_c0_g1	6.58562	3.53e-18	2.69e-16	UP	TRINITY_DN202324_c0_g1	TraesCS5B01G024400.1	1	612	612	0	TraesCS5B01G024400	chr5B	22529761	22530372	Genome polyprotein
	TRINITY_DN25995_c0_g1	10.8386	3.66e-18	2.79e-16	UP	TRINITY_DN25995_c0_g1	TraesCS6A01G381400.1	315	927	1038	0	TraesCS6A01G381400	chr6A	601146836	601148224	Cinnamoyl CoA reductase
	TRINITY_DN69574_c0_g2	6.1329	3.76e-18	2.86e-16	UP	TRINITY_DN69574_c0_g2	TraesCS6D01G104000.1	136	473	870	3.33e-163	TraesCS6D01G104000	chr6D	67569268	67570137	Calcium-dependent lipid-binding domain protein
	TRINITY_DN4026_c3_g1	4.09716	3.76e-18	2.86e-16	UP	TRINITY_DN4026_c3_g1	TraesCS4D01G000500.1	1758	1788	1788	2.1e-07	TraesCS4D01G000500	chr4D	475554	479835	ABC transporter ATP-binding protein ARB1
	TRINITY_DN107980_c0_g1	12.6111	3.81e-18	2.9e-16	UP	TRINITY_DN107980_c0_g1	TraesCS2B01G258400.1	2475	2537	3630	1.94e-25	TraesCS2B01G258400	chr2B	314770790	314787929	Splicing factor family protein
	TRINITY_DN1654_c1_g1	7.38236	3.83e-18	2.91e-16	UP	NA	NA	NA	NA	NA	NA	NA	NA	NA	NA	NA
	TRINITY_DN28505_c1_g1	8.96936	3.86e-18	2.93e-16	UP	NA	NA	NA	NA	NA	NA	NA	NA	NA	NA	NA
	TRINITY_DN55300_c0_g2	8.27951	4.04e-18	3.06e-16	UP	NA	NA	NA	NA	NA	NA	NA	NA	NA	NA	NA
	TRINITY_DN23158_c0_g1	11.9606	4.1e-18	3.1e-16	UP	NA	NA	NA	NA	NA	NA	NA	NA	NA	NA	NA
	TRINITY_DN5128_c0_g1	4.54624	4.12e-18	3.11e-16	UP	NA	NA	NA	NA	NA	NA	NA	NA	NA	NA	NA
	TRINITY_DN206_c0_g1	3.50366	4.24e-18	3.2e-16	UP	NA	NA	NA	NA	NA	NA	NA	NA	NA	NA	NA
	TRINITY_DN28231_c0_g1	6.07993	4.52e-18	3.4e-16	UP	NA	NA	NA	NA	NA	NA	NA	NA	NA	NA	NA
	TRINITY_DN23752_c0_g2	10.2957	4.58e-18	3.44e-16	UP	NA	NA	NA	NA	NA	NA	NA	NA	NA	NA	NA
	TRINITY_DN26709_c0_g3	8.35831	4.8e-18	3.6e-16	UP	NA	NA	NA	NA	NA	NA	NA	NA	NA	NA	NA
	TRINITY_DN4196_c0_g1	13.7396	5.01e-18	3.75e-16	UP	NA	NA	NA	NA	NA	NA	NA	NA	NA	NA	NA
	TRINITY_DN143339_c0_g1	10.2859	5.03e-18	3.76e-16	UP	NA	NA	NA	NA	NA	NA	NA	NA	NA	NA	NA
	TRINITY_DN73610_c2_g1	12.8688	5.04e-18	3.77e-16	UP	NA	NA	NA	NA	NA	NA	NA	NA	NA	NA	NA
	TRINITY_DN33212_c0_g2	10.3768	5.07e-18	3.78e-16	UP	TRINITY_DN33212_c0_g2	TraesCS2A01G248800.1	1307	1114	1380	1.13e-96	TraesCS2A01G248800	chr2A	372734857	372737383	Fasciclin-like arabinogalactan protein
	TRINITY_DN26965_c0_g1	5.59047	5.21e-18	3.87e-16	UP	TRINITY_DN26965_c0_g1	TraesCS1B01G357000.1	1327	1382	1701	1.23e-21	TraesCS1B01G357000	chr1B	586297844	586303030	ATP-dependent 6-phosphofructokinase
	TRINITY_DN20770_c1_g1	10.2757	5.46e-18	4.06e-16	UP	TRINITY_DN20770_c1_g1	TraesCS3D01G274200.1	808	966	966	3.35e-65	TraesCS3D01G274200	chr3D	380123760	380131949	L-ribulose-5-phosphate 3-epimerase UlaE
	TRINITY_DN58055_c0_g1	11.1816	5.46e-18	4.06e-16	UP	TRINITY_DN58055_c0_g1	TraesCSU01G130000.1	1	66	762	4.77e-27	TraesCSU01G130000	chrUn	110522968	110526146	Inner nuclear membrane Man1
	TRINITY_DN63625_c0_g1	4.92179	5.53e-18	4.1e-16	UP	NA	NA	NA	NA	NA	NA	NA	NA	NA	NA	NA
	TRINITY_DN32930_c0_g1	10.2732	5.62e-18	4.16e-16	UP	TRINITY_DN32930_c0_g1	TraesCS2D01G300700.1	506	786	786	1.86e-129	TraesCS2D01G300700	chr2D	383093295	383094080	Ethylene-responsive transcription factor
	TRINITY_DN86274_c0_g1	10.2976	5.63e-18	4.16e-16	UP	NA	NA	NA	NA	NA	NA	NA	NA	NA	NA	NA
	TRINITY_DN69757_c0_g1	10.5049	5.75e-18	4.25e-16	UP	TRINITY_DN69757_c0_g1	TraesCS7D01G516200.1	286	532	957	8.97e-128	TraesCS7D01G516200	chr7D	615946450	615947555	1-aminocyclopropane-1-carboxylate oxidase 1
	TRINITY_DN48219_c0_g1	7.80018	6.32e-18	4.67e-16	UP	TRINITY_DN48219_c0_g1	TraesCS6D01G393800.1	45	424	1164	5.36e-178	TraesCS6D01G393800	chr6D	467546188	467547351	BAG family molecular chaperone regulator 5
	TRINITY_DN33649_c0_g1	9.09665	6.44e-18	4.75e-16	UP	TRINITY_DN33649_c0_g1	TraesCS3A01G528900.1	576	737	1428	2.27e-70	TraesCS3A01G528900	chr3A	742765978	742770170	Vacuolar-processing enzyme
	TRINITY_DN542_c0_g1	3.98423	6.57e-18	4.84e-16	UP	TRINITY_DN542_c0_g1	TraesCS2D01G248200.6	2095	2181	2244	3.03e-16	TraesCS2D01G248200	chr2D	291952565	291956637	Receptor protein kinase-like protein
	TRINITY_DN28004_c0_g1	10.4815	6.58e-18	4.84e-16	UP	NA	NA	NA	NA	NA	NA	NA	NA	NA	NA	NA
	TRINITY_DN11174_c0_g1	11.0554	6.76e-18	4.96e-16	UP	TRINITY_DN11174_c0_g1	TraesCS1B01G473900.1	290	360	360	2.11e-29	TraesCS1B01G473900	chr1B	681847664	681850883	Acetyl-CoA:benzylalcohol acetyltranferase
	TRINITY_DN15259_c0_g1	6.04622	6.85e-18	5.02e-16	UP	TRINITY_DN15259_c0_g1	TraesCS1B01G325600.1	787	844	927	9.05e-21	TraesCS1B01G325600	chr1B	551218727	551219653	Transposon protein, putative, Mutator sub-class
	TRINITY_DN47503_c0_g1	6.32349	7e-18	5.12e-16	UP	NA	NA	NA	NA	NA	NA	NA	NA	NA	NA	NA
	TRINITY_DN19056_c0_g1	11.208	7.14e-18	5.22e-16	UP	NA	NA	NA	NA	NA	NA	NA	NA	NA	NA	NA
	TRINITY_DN13924_c0_g3	10.3871	7.24e-18	5.28e-16	UP	TRINITY_DN13924_c0_g3	TraesCS7D01G376800.1	2845	2985	2985	2.23e-68	TraesCS7D01G376800	chr7D	488045376	488051103	Elongation factor like protein
	TRINITY_DN11110_c1_g1	3.89276	7.31e-18	5.33e-16	UP	TRINITY_DN11110_c1_g1	TraesCS1B01G097400.1	141	199	660	3.79e-23	TraesCS1B01G097400	chr1B	101590765	101591796	Glutathione S-transferase
	TRINITY_DN34234_c0_g1	10.4943	7.4e-18	5.39e-16	UP	TRINITY_DN34234_c0_g1	TraesCS3B01G384800.1	462	520	1377	2.67e-23	TraesCS3B01G384800	chr3B	605014208	605017449	Carboxypeptidase
	TRINITY_DN4498_c1_g1	10.5689	7.49e-18	5.45e-16	UP	TRINITY_DN4498_c1_g1	TraesCS7B01G331700.1	1	441	441	0	TraesCS7B01G331700	chr7B	586748610	586750570	Extracellular matrix-binding protein EbhA
	TRINITY_DN1983_c3_g1	9.50744	7.52e-18	5.47e-16	UP	NA	NA	NA	NA	NA	NA	NA	NA	NA	NA	NA
	TRINITY_DN19686_c2_g1	10.3617	8.13e-18	5.89e-16	UP	NA	NA	NA	NA	NA	NA	NA	NA	NA	NA	NA
	TRINITY_DN2903_c0_g1	5.11856	8.33e-18	6.03e-16	UP	TRINITY_DN2903_c0_g1	TraesCS1A01G375600.2	255	1107	1107	0	TraesCS1A01G375600	chr1A	550311989	550314347	Heat shock transcription factor
	TRINITY_DN288_c0_g4	5.05823	8.44e-18	6.1e-16	UP	NA	NA	NA	NA	NA	NA	NA	NA	NA	NA	NA
	TRINITY_DN8353_c3_g1	10.8853	8.72e-18	6.28e-16	UP	NA	NA	NA	NA	NA	NA	NA	NA	NA	NA	NA
	TRINITY_DN6554_c0_g1	9.55274	9.02e-18	6.49e-16	UP	TRINITY_DN6554_c0_g1	TraesCSU01G047300.1	3	190	621	2.7e-43	TraesCSU01G047300	chrUn	37338311	37338931	Heat shock protein
	TRINITY_DN15104_c0_g1	5.1973	9.28e-18	6.66e-16	UP	TRINITY_DN15104_c0_g1	TraesCS3D01G221100.1	1183	1381	1485	1.71e-100	TraesCS3D01G221100	chr3D	301580319	301585399	Zinc finger protein ZPR1
	TRINITY_DN6332_c0_g1	5.57528	9.32e-18	6.69e-16	UP	TRINITY_DN6332_c0_g1	TraesCS2D01G210300.1	1	219	219	7.57e-108	TraesCS2D01G210300	chr2D	166136857	166137075	Wound-responsive family protein
	TRINITY_DN24391_c1_g2	10.098	9.53e-18	6.84e-16	UP	TRINITY_DN24391_c1_g2	TraesCS2A01G371100.1	918	537	918	0	TraesCS2A01G371100	chr2A	613688638	613690027	Short chain dehydrogenase/reductase
	TRINITY_DN485_c1_g1	5.14022	9.56e-18	6.85e-16	UP	NA	NA	NA	NA	NA	NA	NA	NA	NA	NA	NA
	TRINITY_DN24296_c0_g1	5.98623	9.83e-18	7.03e-16	UP	TRINITY_DN24296_c0_g1	TraesCS6A01G083200.1	192	252	744	2.33e-24	TraesCS6A01G083200	chr6A	51947908	51953052	Bax inhibitor 1-like protein
	TRINITY_DN26631_c0_g1	6.18391	9.83e-18	7.03e-16	UP	TRINITY_DN26631_c0_g1	TraesCS7D01G068800.1	277	419	1002	7.15e-70	TraesCS7D01G068800	chr7D	39514541	39517436	Myeloid leukemia factor 1
	TRINITY_DN23480_c0_g1	5.29307	1.07e-17	7.62e-16	UP	TRINITY_DN23480_c0_g1	TraesCS7A01G073800.1	678	915	915	1.94e-83	TraesCS7A01G073800	chr7A	39227825	39230863	Myeloid leukemia factor 1
	TRINITY_DN9117_c5_g1	10.4717	1.07e-17	7.62e-16	UP	NA	NA	NA	NA	NA	NA	NA	NA	NA	NA	NA
	TRINITY_DN27025_c0_g1	7.48669	1.07e-17	7.64e-16	UP	NA	NA	NA	NA	NA	NA	NA	NA	NA	NA	NA
	TRINITY_DN19240_c1_g1	10.4477	1.07e-17	7.65e-16	UP	NA	NA	NA	NA	NA	NA	NA	NA	NA	NA	NA
	TRINITY_DN137233_c2_g1	12.3527	1.09e-17	7.74e-16	UP	TRINITY_DN137233_c2_g1	TraesCS2D01G468200.1	1345	1734	1734	0	TraesCS2D01G468200	chr2D	572952347	572954307	Polyphenol oxidase
	TRINITY_DN256929_c0_g1	12.6482	1.09e-17	7.75e-16	UP	NA	NA	NA	NA	NA	NA	NA	NA	NA	NA	NA
	TRINITY_DN14887_c0_g2	6.03754	1.12e-17	7.95e-16	UP	TRINITY_DN14887_c0_g2	TraesCS4B01G379800.2	743	804	1149	2.73e-24	TraesCS4B01G379800	chr4B	660591232	660594196	Man1-Src1p-carboxy-terminal domain protein
	TRINITY_DN288_c0_g6	6.08277	1.16e-17	8.24e-16	UP	NA	NA	NA	NA	NA	NA	NA	NA	NA	NA	NA
	TRINITY_DN47436_c0_g2	7.61578	1.17e-17	8.29e-16	UP	TRINITY_DN47436_c0_g2	TraesCS5B01G023900.1	128	300	1296	3.36e-86	TraesCS5B01G023900	chr5B	22037230	22044977	Ankyrin repeat protein-like
	TRINITY_DN43666_c1_g1	10.5749	1.18e-17	8.33e-16	UP	NA	NA	NA	NA	NA	NA	NA	NA	NA	NA	NA
	TRINITY_DN17203_c0_g1	8.21363	1.23e-17	8.68e-16	UP	NA	NA	NA	NA	NA	NA	NA	NA	NA	NA	NA
	TRINITY_DN50382_c0_g3	10.5444	1.25e-17	8.8e-16	UP	TRINITY_DN50382_c0_g3	TraesCS4D01G298300.1	329	1	387	1.3e-70	TraesCS4D01G298300	chr4D	467616558	467617195	Trypsin inhibitor
	TRINITY_DN11508_c0_g1	6.16571	1.25e-17	8.81e-16	UP	TRINITY_DN11508_c0_g1	TraesCS5A01G103800.1	1037	1082	1128	8.8e-11	TraesCS5A01G103800	chr5A	164135377	164159961	E3 ubiquitin-protein ligase RGLG2
	TRINITY_DN3786_c0_g1	3.72162	1.34e-17	9.44e-16	UP	TRINITY_DN3786_c0_g1	TraesCS3B01G255300.1	636	702	1134	4.83e-27	TraesCS3B01G255300	chr3B	411831372	411837719	SGT1
	TRINITY_DN65200_c0_g1	10.5882	1.36e-17	9.5e-16	UP	TRINITY_DN65200_c0_g1	TraesCS7A01G003600.1	1059	1545	1545	0	TraesCS7A01G003600	chr7A	1849290	1852248	Homogentisate 1,2-dioxygenase
	TRINITY_DN6679_c1_g1	4.67064	1.44e-17	1.01e-15	UP	NA	NA	NA	NA	NA	NA	NA	NA	NA	NA	NA
	TRINITY_DN31823_c0_g5	10.8715	1.46e-17	1.02e-15	UP	NA	NA	NA	NA	NA	NA	NA	NA	NA	NA	NA
	TRINITY_DN57857_c0_g1	10.2378	1.47e-17	1.02e-15	UP	TRINITY_DN57857_c0_g1	TraesCS7A01G394700.1	1	233	603	2.76e-118	TraesCS7A01G394700	chr7A	573069072	573069674	TMV response-related protein
	TRINITY_DN23880_c0_g1	11.4114	1.49e-17	1.04e-15	UP	TRINITY_DN23880_c0_g1	TraesCS5D01G258900.2	319	383	2346	1.17e-26	TraesCS5D01G258900	chr5D	365125649	365129881	Chaperone protein htpG family protein
	TRINITY_DN8608_c0_g1	8.903	1.49e-17	1.04e-15	UP	NA	NA	NA	NA	NA	NA	NA	NA	NA	NA	NA
	TRINITY_DN45256_c0_g1	10.2231	1.52e-17	1.06e-15	UP	NA	NA	NA	NA	NA	NA	NA	NA	NA	NA	NA
	TRINITY_DN4776_c0_g3	12.6192	1.57e-17	1.09e-15	UP	TRINITY_DN4776_c0_g3	TraesCS3D01G115100.1	10	480	480	9.47e-132	TraesCS3D01G115100	chr3D	68389095	68389856	Heat shock protein
	TRINITY_DN20427_c0_g1	7.68228	1.6e-17	1.11e-15	UP	TRINITY_DN20427_c0_g1	TraesCS6A01G329900.2	193	373	1095	6.69e-91	TraesCS6A01G329900	chr6A	562812563	562814634	WAT1-related protein
	TRINITY_DN25252_c0_g1	3.76145	1.61e-17	1.12e-15	UP	TRINITY_DN25252_c0_g1	TraesCS4A01G475300.1	1	426	426	0	TraesCS4A01G475300	chr4A	734287687	734289624	NSP-interacting kinase 2
	TRINITY_DN34057_c0_g1	11.0116	1.67e-17	1.16e-15	UP	NA	NA	NA	NA	NA	NA	NA	NA	NA	NA	NA
	TRINITY_DN34199_c0_g1	7.00633	1.69e-17	1.17e-15	UP	TRINITY_DN34199_c0_g1	TraesCS1B01G151300.1	774	822	2061	1.69e-17	TraesCS1B01G151300	chr1B	236957822	236963066	Chaperone DnaK
	TRINITY_DN10737_c0_g2	10.6181	1.7e-17	1.17e-15	UP	NA	NA	NA	NA	NA	NA	NA	NA	NA	NA	NA
	TRINITY_DN17545_c0_g1	8.62123	1.71e-17	1.18e-15	UP	TRINITY_DN17545_c0_g1	TraesCS4B01G243400.1	1203	1484	1743	3.63e-147	TraesCS4B01G243400	chr4B	504934572	504936314	Heat shock 70 kDa protein
	TRINITY_DN26741_c0_g1	10.4455	1.76e-17	1.21e-15	UP	NA	NA	NA	NA	NA	NA	NA	NA	NA	NA	NA
	TRINITY_DN17906_c0_g1	13.1462	1.78e-17	1.23e-15	UP	NA	NA	NA	NA	NA	NA	NA	NA	NA	NA	NA
	TRINITY_DN2046_c1_g1	10.5769	1.85e-17	1.27e-15	UP	TRINITY_DN2046_c1_g1	TraesCS2B01G053200.1	1	165	906	1.41e-80	TraesCS2B01G053200	chr2B	26135642	26136547	Acidic chitinase
	TRINITY_DN108728_c0_g1	5.7056	1.9e-17	1.3e-15	UP	TRINITY_DN108728_c0_g1	TraesCS2D01G050300.1	325	365	1950	6.44e-13	TraesCS2D01G050300	chr2D	18642131	18646326	Peptidylprolyl isomerase
	TRINITY_DN22072_c0_g1	9.90268	1.95e-17	1.33e-15	UP	NA	NA	NA	NA	NA	NA	NA	NA	NA	NA	NA
	TRINITY_DN2891_c0_g2	8.00067	2.03e-17	1.38e-15	UP	TRINITY_DN2891_c0_g2	TraesCS6B01G210600.1	758	526	783	2.33e-114	TraesCS6B01G210600	chr6B	278151141	278152007	Heat shock protein
	TRINITY_DN190154_c0_g1	10.2752	2.03e-17	1.38e-15	UP	NA	NA	NA	NA	NA	NA	NA	NA	NA	NA	NA
	TRINITY_DN42741_c0_g1	7.75846	2.06e-17	1.4e-15	UP	NA	NA	NA	NA	NA	NA	NA	NA	NA	NA	NA
	TRINITY_DN11658_c0_g1	8.04526	2.17e-17	1.47e-15	UP	TRINITY_DN11658_c0_g1	TraesCS2D01G057000.1	785	933	933	3.41e-68	TraesCS2D01G057000	chr2D	22767625	22768557	Acidic chitinase
	TRINITY_DN1316_c0_g1	10.2665	2.26e-17	1.53e-15	UP	TRINITY_DN1316_c0_g1	TraesCS7D01G545800.1	3323	3773	3954	3.24e-129	TraesCS7D01G545800	chr7D	632801275	632820118	receptor kinase 1
	TRINITY_DN6755_c1_g2	10.2146	2.35e-17	1.59e-15	UP	TRINITY_DN6755_c1_g2	TraesCS5A01G556500.1	3101	3294	3294	2.3e-96	TraesCS5A01G556500	chr5A	707822260	707827915	Kinesin-like protein
	TRINITY_DN55301_c0_g1	7.36156	2.41e-17	1.62e-15	UP	NA	NA	NA	NA	NA	NA	NA	NA	NA	NA	NA
	TRINITY_DN551_c0_g1	4.07881	2.41e-17	1.63e-15	UP	NA	NA	NA	NA	NA	NA	NA	NA	NA	NA	NA
	TRINITY_DN22749_c0_g2	10.2627	2.44e-17	1.65e-15	UP	TRINITY_DN22749_c0_g2	TraesCS7D01G546600.1	709	1016	2115	1.99e-110	TraesCS7D01G546600	chr7D	633250908	633253449	Tetratricopeptide repeat-like superfamily protein, putative isoform 1
	TRINITY_DN18507_c0_g1	5.34123	2.45e-17	1.65e-15	UP	NA	NA	NA	NA	NA	NA	NA	NA	NA	NA	NA
	TRINITY_DN1783_c2_g3	7.13721	2.55e-17	1.71e-15	UP	TRINITY_DN1783_c2_g3	TraesCS2A01G531500.1	193	273	273	9.84e-27	TraesCS2A01G531500	chr2A	748542328	748542600	Wound-responsive family protein
	TRINITY_DN4009_c0_g1	4.41238	2.55e-17	1.72e-15	UP	TRINITY_DN4009_c0_g1	TraesCS4B01G056300.1	1	291	291	3.92e-87	TraesCS4B01G056300	chr4B	45772210	45772500	Lariat debranching enzyme
	TRINITY_DN13022_c1_g3	6.98597	2.55e-17	1.72e-15	UP	TRINITY_DN13022_c1_g3	TraesCS4A01G163000.1	2896	2954	3354	1.91e-22	TraesCS4A01G163000	chr4A	362065937	362113687	Ubiquitin carboxyl-terminal hydrolase family protein, expressed
	TRINITY_DN6843_c0_g3	5.01743	2.73e-17	1.83e-15	UP	TRINITY_DN6843_c0_g3	TraesCS5B01G495500.1	948	1146	1146	9.02e-99	TraesCS5B01G495500	chr5B	662976884	662980348	Hsp70 nucleotide exchange factor fes1
	TRINITY_DN87475_c0_g1	10.1999	2.77e-17	1.85e-15	UP	TRINITY_DN87475_c0_g1	TraesCS4D01G201100.1	520	583	903	4.12e-26	TraesCS4D01G201100	chr4D	348295322	348299501	Glutathione-S-transferase
	TRINITY_DN20950_c1_g1	10.4121	2.79e-17	1.86e-15	UP	TRINITY_DN20950_c1_g1	TraesCS7D01G352400.1	318	1	1158	2.56e-161	TraesCS7D01G352400	chr7D	454071067	454072493	Kelch repeat protein
	TRINITY_DN17820_c9_g1	7.6367	2.87e-17	1.91e-15	UP	NA	NA	NA	NA	NA	NA	NA	NA	NA	NA	NA
	TRINITY_DN509_c2_g1	11.3938	2.9e-17	1.93e-15	UP	NA	NA	NA	NA	NA	NA	NA	NA	NA	NA	NA
	TRINITY_DN34990_c0_g1	5.40112	2.94e-17	1.96e-15	UP	TRINITY_DN34990_c0_g1	TraesCS1B01G422400.1	865	1069	1587	1.62e-104	TraesCS1B01G422400	chr1B	645511135	645514305	Structural constituent of cell wall
	TRINITY_DN5930_c2_g1	7.56925	2.98e-17	1.98e-15	UP	NA	NA	NA	NA	NA	NA	NA	NA	NA	NA	NA
	TRINITY_DN126225_c1_g1	10.212	2.99e-17	1.98e-15	UP	TRINITY_DN126225_c1_g1	TraesCS2A01G010200.1	16	445	1233	4.3e-143	TraesCS2A01G010200	chr2A	3964870	3967583	StAR-related lipid transfer protein
	TRINITY_DN8760_c0_g1	6.86269	3e-17	1.99e-15	UP	TRINITY_DN8760_c0_g1	TraesCS2D01G487000.1	1	203	312	3.68e-103	TraesCS2D01G487000	chr2D	587107133	587107444	Wound-responsive family protein
	TRINITY_DN27576_c0_g1	6.36179	3.05e-17	2.02e-15	UP	TRINITY_DN27576_c0_g1	TraesCS2A01G290000.1	614	477	975	3.56e-34	TraesCS2A01G290000	chr2A	498840377	498841901	SBP (S-ribonuclease-binding protein) family protein, putative
	TRINITY_DN52981_c0_g1	4.15956	3.16e-17	2.1e-15	UP	TRINITY_DN52981_c0_g1	TraesCS4D01G102900.1	1	276	276	4.18e-143	TraesCS4D01G102900	chr4D	81917162	81917723	Expressed protein-RZ53
	TRINITY_DN1010_c3_g1	4.07957	3.27e-17	2.17e-15	UP	TRINITY_DN1010_c3_g1	TraesCS4B01G379800.2	1	746	1149	0	TraesCS4B01G379800	chr4B	660591232	660594196	Man1-Src1p-carboxy-terminal domain protein
	TRINITY_DN8993_c0_g1	4.25616	3.29e-17	2.17e-15	UP	TRINITY_DN8993_c0_g1	TraesCS5B01G459100.1	174	697	1128	0	TraesCS5B01G459100	chr5B	634993017	634995229	Prolyl 4-hydroxylase alpha subunit, putative
	TRINITY_DN23220_c0_g1	3.49363	3.33e-17	2.2e-15	UP	TRINITY_DN23220_c0_g1	TraesCS5A01G426100.1	222	324	1266	1.13e-47	TraesCS5A01G426100	chr5A	611339340	611341842	Chaperone protein dnaJ, putative
	TRINITY_DN17902_c0_g1	5.86358	3.36e-17	2.22e-15	UP	TRINITY_DN17902_c0_g1	TraesCS6A01G134500.1	13	369	369	1.53e-149	TraesCS6A01G134500	chr6A	106878296	106878664	Wound-responsive family protein
	TRINITY_DN14329_c0_g1	4.76123	3.39e-17	2.23e-15	UP	TRINITY_DN14329_c0_g1	TraesCS2A01G050600.1	1575	1632	1938	1.54e-22	TraesCS2A01G050600	chr2A	19646183	19652126	Peptidylprolyl isomerase
	TRINITY_DN29700_c0_g2	13.4993	3.42e-17	2.25e-15	UP	NA	NA	NA	NA	NA	NA	NA	NA	NA	NA	NA
	TRINITY_DN19386_c0_g1	4.32159	3.42e-17	2.25e-15	UP	NA	NA	NA	NA	NA	NA	NA	NA	NA	NA	NA
	TRINITY_DN36598_c0_g1	3.57961	3.45e-17	2.27e-15	UP	NA	NA	NA	NA	NA	NA	NA	NA	NA	NA	NA
	TRINITY_DN53495_c0_g2	14.1043	3.48e-17	2.28e-15	UP	TRINITY_DN53495_c0_g2	TraesCS2A01G130800.1	1200	1034	2349	8.19e-48	TraesCS2A01G130800	chr2A	78560529	78564496	Phosphatidylinositol 4-phosphate 5-kinase 4
	TRINITY_DN74090_c0_g3	10.1815	3.53e-17	2.31e-15	UP	NA	NA	NA	NA	NA	NA	NA	NA	NA	NA	NA
	TRINITY_DN35163_c0_g1	7.72695	3.54e-17	2.32e-15	UP	NA	NA	NA	NA	NA	NA	NA	NA	NA	NA	NA
	TRINITY_DN35110_c0_g2	6.79509	3.65e-17	2.39e-15	UP	TRINITY_DN35110_c0_g2	TraesCS3B01G090000.1	237	282	282	9.49e-16	TraesCS3B01G090000	chr3B	59327704	59327985	Avr9/Cf-9 rapidly elicited protein
	TRINITY_DN28155_c3_g1	10.1728	3.69e-17	2.42e-15	UP	TRINITY_DN28155_c3_g1	TraesCS7A01G477200.1	89	172	480	5.8e-25	TraesCS7A01G477200	chr7A	670956208	670957725	F-box and associated interaction domains-containing protein
	TRINITY_DN12174_c0_g1	6.72738	3.86e-17	2.52e-15	UP	TRINITY_DN12174_c0_g1	TraesCS1B01G389200.1	300	614	1140	1.87e-160	TraesCS1B01G389200	chr1B	622706636	622708876	Alcohol dehydrogenase
	TRINITY_DN134403_c0_g3	10.9053	3.91e-17	2.55e-15	UP	TRINITY_DN134403_c0_g3	TraesCS2B01G561600.1	249	303	303	5.85e-19	TraesCS2B01G561600	chr2B	754151966	754152580	Wound-responsive family protein
	TRINITY_DN202_c1_g1	4.00523	3.92e-17	2.56e-15	UP	TRINITY_DN202_c1_g1	TraesCS5A01G482400.1	631	1146	1146	0	TraesCS5A01G482400	chr5A	654086402	654090003	Hsp70 nucleotide exchange factor fes1
	TRINITY_DN27213_c0_g1	4.04733	3.94e-17	2.56e-15	UP	TRINITY_DN27213_c0_g1	TraesCS1A01G051500.1	381	474	528	9.71e-41	TraesCS1A01G051500	chr1A	33019173	33022461	Prostaglandin E synthase 3
	TRINITY_DN59598_c3_g1	10.4664	3.94e-17	2.56e-15	UP	NA	NA	NA	NA	NA	NA	NA	NA	NA	NA	NA
	TRINITY_DN15770_c0_g1	8.90487	4.33e-17	2.81e-15	UP	TRINITY_DN15770_c0_g1	TraesCS3A01G193500.1	249	331	789	8.43e-36	TraesCS3A01G193500	chr3A	264024606	264049013	2,3,4,5-tetrahydropyridine-2,6-dicarboxylate N-acetyltransferase
	TRINITY_DN26614_c0_g1	10.1465	4.36e-17	2.83e-15	UP	NA	NA	NA	NA	NA	NA	NA	NA	NA	NA	NA
	TRINITY_DN15815_c0_g2	5.40509	4.42e-17	2.86e-15	UP	NA	NA	NA	NA	NA	NA	NA	NA	NA	NA	NA
	TRINITY_DN72018_c2_g1	8.0339	4.43e-17	2.87e-15	UP	NA	NA	NA	NA	NA	NA	NA	NA	NA	NA	NA
	TRINITY_DN47098_c0_g2	4.76704	4.51e-17	2.92e-15	UP	NA	NA	NA	NA	NA	NA	NA	NA	NA	NA	NA
	TRINITY_DN56591_c0_g1	6.82476	4.52e-17	2.92e-15	UP	NA	NA	NA	NA	NA	NA	NA	NA	NA	NA	NA
	TRINITY_DN565_c1_g2	8.41052	4.53e-17	2.92e-15	UP	TRINITY_DN565_c1_g2	TraesCS2B01G263300.1	133	1	2886	5.91e-63	TraesCS2B01G263300	chr2B	353564559	353586560	Valine--tRNA ligase
	TRINITY_DN154892_c0_g1	13.1024	4.68e-17	3.02e-15	UP	TRINITY_DN154892_c0_g1	TraesCS3B01G130400.1	66	1	483	1.41e-20	TraesCS3B01G130400	chr3B	112496506	112497228	Heat shock protein
	TRINITY_DN13780_c0_g1	11.9893	4.69e-17	3.02e-15	UP	NA	NA	NA	NA	NA	NA	NA	NA	NA	NA	NA
	TRINITY_DN114794_c0_g1	3.90645	4.7e-17	3.03e-15	UP	TRINITY_DN114794_c0_g1	TraesCS2A01G121200.1	3	62	474	4.9e-22	TraesCS2A01G121200	chr2A	70984323	70986598	Superoxide dismutase [Cu-Zn]
	TRINITY_DN9027_c0_g2	13.8676	4.71e-17	3.03e-15	UP	NA	NA	NA	NA	NA	NA	NA	NA	NA	NA	NA
	TRINITY_DN67247_c0_g1	10.138	4.71e-17	3.03e-15	UP	NA	NA	NA	NA	NA	NA	NA	NA	NA	NA	NA
	TRINITY_DN8367_c0_g1	13.6452	4.75e-17	3.05e-15	UP	NA	NA	NA	NA	NA	NA	NA	NA	NA	NA	NA
	TRINITY_DN77607_c0_g1	6.68279	4.79e-17	3.07e-15	UP	TRINITY_DN77607_c0_g1	TraesCS7D01G365500.1	282	585	585	5.68e-129	TraesCS7D01G365500	chr7D	471931849	471932851	Oxidative stress 3, putative isoform 1
	TRINITY_DN15938_c0_g3	5.7481	4.9e-17	3.14e-15	UP	NA	NA	NA	NA	NA	NA	NA	NA	NA	NA	NA
	TRINITY_DN82580_c0_g1	13.2187	4.97e-17	3.18e-15	UP	NA	NA	NA	NA	NA	NA	NA	NA	NA	NA	NA
	TRINITY_DN5652_c1_g1	10.8592	5.02e-17	3.21e-15	UP	NA	NA	NA	NA	NA	NA	NA	NA	NA	NA	NA
	TRINITY_DN15940_c0_g1	10.8972	5.21e-17	3.33e-15	UP	NA	NA	NA	NA	NA	NA	NA	NA	NA	NA	NA
	TRINITY_DN1268_c0_g2	7.32068	5.36e-17	3.42e-15	UP	TRINITY_DN1268_c0_g2	TraesCS4A01G226700.1	393	1	747	1.88e-152	TraesCS4A01G226700	chr4A	534811309	534812238	Heat-shock protein, putative
	TRINITY_DN81690_c0_g1	7.20616	5.37e-17	3.42e-15	UP	NA	NA	NA	NA	NA	NA	NA	NA	NA	NA	NA
	TRINITY_DN21461_c0_g1	7.41617	5.38e-17	3.43e-15	UP	TRINITY_DN21461_c0_g1	TraesCS7B01G479100.1	999	2161	3897	0	TraesCS7B01G479100	chr7B	733797617	733801596	NBS-LRR disease resistance protein-like protein
	TRINITY_DN51283_c0_g1	6.18693	5.6e-17	3.55e-15	UP	TRINITY_DN51283_c0_g1	TraesCS2B01G294500.1	234	375	1764	1.28e-62	TraesCS2B01G294500	chr2B	411140591	411143398	Peptidylprolyl isomerase
	TRINITY_DN42407_c0_g1	12.8691	5.7e-17	3.62e-15	UP	NA	NA	NA	NA	NA	NA	NA	NA	NA	NA	NA
	TRINITY_DN10100_c0_g1	13.8249	5.76e-17	3.65e-15	UP	NA	NA	NA	NA	NA	NA	NA	NA	NA	NA	NA
	TRINITY_DN4063_c0_g1	5.08088	5.87e-17	3.71e-15	UP	TRINITY_DN4063_c0_g1	TraesCS4B01G278100.1	229	924	1026	0	TraesCS4B01G278100	chr4B	560012716	560014885	Heat shock transcription factor
	TRINITY_DN43707_c0_g1	10.4367	5.91e-17	3.74e-15	UP	NA	NA	NA	NA	NA	NA	NA	NA	NA	NA	NA
	TRINITY_DN35037_c0_g1	10.1297	6.13e-17	3.88e-15	UP	NA	NA	NA	NA	NA	NA	NA	NA	NA	NA	NA
	TRINITY_DN32843_c0_g2	6.19574	6.14e-17	3.88e-15	UP	TRINITY_DN32843_c0_g2	TraesCS3D01G346200.1	1119	1229	1371	1.41e-51	TraesCS3D01G346200	chr3D	457403304	457406487	Carboxypeptidase
	TRINITY_DN20424_c0_g1	6.15695	6.21e-17	3.92e-15	UP	TRINITY_DN20424_c0_g1	TraesCS3A01G352300.1	425	498	510	2.11e-26	TraesCS3A01G352300	chr3A	600321687	600323239	ATP-dependent Clp protease adapter protein ClpS
	TRINITY_DN10731_c0_g3	7.65351	6.39e-17	4.03e-15	UP	TRINITY_DN10731_c0_g3	TraesCS7A01G529000.1	420	85	420	7.26e-162	TraesCS7A01G529000	chr7A	709129567	709129986	Chaperone protein dnaJ
	TRINITY_DN9001_c0_g1	10.782	6.4e-17	4.03e-15	UP	TRINITY_DN9001_c0_g1	TraesCS7D01G315500.1	1	279	1011	1.74e-145	TraesCS7D01G315500	chr7D	401549892	401552124	Fructokinase-2
	TRINITY_DN4553_c0_g1	10.6413	6.41e-17	4.04e-15	UP	NA	NA	NA	NA	NA	NA	NA	NA	NA	NA	NA
	TRINITY_DN134508_c2_g1	10.1163	6.45e-17	4.06e-15	UP	TRINITY_DN134508_c2_g1	TraesCS2A01G057600.1	812	923	1011	1.23e-22	TraesCS2A01G057600	chr2A	24180935	24181945	MBOAT (membrane bound O-acyl transferase) family protein
	TRINITY_DN59239_c0_g1	6.49577	6.53e-17	4.1e-15	UP	NA	NA	NA	NA	NA	NA	NA	NA	NA	NA	NA
	TRINITY_DN111041_c0_g1	11.5	6.56e-17	4.12e-15	UP	NA	NA	NA	NA	NA	NA	NA	NA	NA	NA	NA
	TRINITY_DN97063_c0_g1	13.0912	6.63e-17	4.16e-15	UP	NA	NA	NA	NA	NA	NA	NA	NA	NA	NA	NA
	TRINITY_DN84325_c0_g1	10.3084	6.76e-17	4.23e-15	UP	NA	NA	NA	NA	NA	NA	NA	NA	NA	NA	NA
	TRINITY_DN17233_c3_g1	10.1699	6.76e-17	4.23e-15	UP	TRINITY_DN17233_c3_g1	TraesCS5B01G023100.1	68	357	969	6.43e-150	TraesCS5B01G023100	chr5B	21524523	21526593	2-aminoethanethiol dioxygenase
	TRINITY_DN17971_c2_g1	10.1192	6.79e-17	4.25e-15	UP	NA	NA	NA	NA	NA	NA	NA	NA	NA	NA	NA
	TRINITY_DN4880_c1_g1	4.90491	6.85e-17	4.28e-15	UP	NA	NA	NA	NA	NA	NA	NA	NA	NA	NA	NA
	TRINITY_DN10545_c0_g3	5.98547	6.94e-17	4.33e-15	UP	NA	NA	NA	NA	NA	NA	NA	NA	NA	NA	NA
	TRINITY_DN35805_c0_g2	10.1577	6.95e-17	4.34e-15	UP	NA	NA	NA	NA	NA	NA	NA	NA	NA	NA	NA
	TRINITY_DN293_c8_g1	7.40014	7.48e-17	4.66e-15	UP	TRINITY_DN293_c8_g1	TraesCS2A01G360000.1	414	354	480	2.58e-13	TraesCS2A01G360000	chr2A	603855754	603856938	Cysteine-rich receptor-like protein kinase 41
	TRINITY_DN4786_c0_g1	5.13854	7.49e-17	4.66e-15	UP	TRINITY_DN4786_c0_g1	TraesCS1D01G382900.1	1	186	1095	9.1e-92	TraesCS1D01G382900	chr1D	457849896	457852204	Heat shock transcription factor
	TRINITY_DN9202_c0_g1	8.80385	7.49e-17	4.66e-15	UP	TRINITY_DN9202_c0_g1	TraesCS5D01G305500.1	96	197	1827	5.98e-42	TraesCS5D01G305500	chr5D	400295411	400297237	Heat shock 70 kDa protein
	TRINITY_DN126_c0_g4	4.40691	7.82e-17	4.85e-15	UP	TRINITY_DN126_c0_g4	TraesCS4B01G211600.1	348	474	474	1.61e-60	TraesCS4B01G211600	chr4B	449928126	449929253	Heat-shock protein
	TRINITY_DN48332_c0_g1	5.95314	7.94e-17	4.91e-15	UP	NA	NA	NA	NA	NA	NA	NA	NA	NA	NA	NA
	TRINITY_DN8860_c0_g1	4.44426	7.95e-17	4.92e-15	UP	TRINITY_DN8860_c0_g1	TraesCS5B01G101600.1	1	312	312	4.4e-153	TraesCS5B01G101600	chr5B	134543449	134543760	Glutaredoxin family protein
	TRINITY_DN30430_c0_g1	5.15277	8.02e-17	4.96e-15	UP	NA	NA	NA	NA	NA	NA	NA	NA	NA	NA	NA
	TRINITY_DN46784_c1_g1	5.29514	8.09e-17	5e-15	UP	TRINITY_DN46784_c1_g1	TraesCS2D01G453400.1	55	279	279	1.08e-108	TraesCS2D01G453400	chr2D	562340782	562341642	senescence-associated family protein (DUF581)
	TRINITY_DN15885_c0_g1	8.23377	8.12e-17	5.01e-15	UP	TRINITY_DN15885_c0_g1	TraesCS1D01G312400.1	104	432	432	5.82e-116	TraesCS1D01G312400	chr1D	408249561	408250210	SOSS complex subunit B-like protein
	TRINITY_DN36216_c0_g1	10.2971	8.14e-17	5.02e-15	UP	NA	NA	NA	NA	NA	NA	NA	NA	NA	NA	NA
	TRINITY_DN25995_c0_g2	11.1442	8.18e-17	5.04e-15	UP	TRINITY_DN25995_c0_g2	TraesCS6B01G420200.1	319	654	1038	1.18e-173	TraesCS6B01G420200	chr6B	691782272	691783993	Cinnamoyl CoA reductase
	TRINITY_DN242_c1_g2	4.89173	8.18e-17	5.04e-15	UP	TRINITY_DN242_c1_g2	TraesCS4B01G106500.1	1	1140	1140	0	TraesCS4B01G106500	chr4B	115879361	115881669	Alcohol dehydrogenase
	TRINITY_DN56881_c0_g2	10.011	8.26e-17	5.08e-15	UP	NA	NA	NA	NA	NA	NA	NA	NA	NA	NA	NA
	TRINITY_DN54250_c0_g1	8.26039	8.32e-17	5.12e-15	UP	TRINITY_DN54250_c0_g1	TraesCS3A01G472000.1	482	1256	1257	0	TraesCS3A01G472000	chr3A	703270282	703271538	Basic 7S globulin 2
	TRINITY_DN9117_c0_g1	4.76581	8.46e-17	5.2e-15	UP	TRINITY_DN9117_c0_g1	TraesCS5B01G293200.1	406	457	465	3.63e-14	TraesCS5B01G293200	chr5B	478336154	478336618	Formate--tetrahydrofolate ligase
	TRINITY_DN333_c0_g3	4.69445	8.61e-17	5.29e-15	UP	TRINITY_DN333_c0_g3	TraesCS4D01G070400.2	1	1512	1512	0	TraesCS4D01G070400	chr4D	45699585	45705080	RING/U-box superfamily protein
	TRINITY_DN9562_c0_g1	3.98535	8.91e-17	5.46e-15	UP	TRINITY_DN9562_c0_g1	TraesCS1D01G401200.1	1	267	267	1.79e-138	TraesCS1D01G401200	chr1D	467467187	467467838	Clavata3/ESR (CLE) gene family member
	TRINITY_DN34068_c1_g1	14.1099	8.95e-17	5.48e-15	UP	NA	NA	NA	NA	NA	NA	NA	NA	NA	NA	NA
	TRINITY_DN98434_c0_g1	13.8082	9e-17	5.51e-15	UP	TRINITY_DN98434_c0_g1	TraesCS1B01G148300.1	110	1	366	1.33e-41	TraesCS1B01G148300	chr1B	216473675	216474040	Major facilitator superfamily protein
	TRINITY_DN9468_c1_g1	8.12725	9.12e-17	5.57e-15	UP	TRINITY_DN9468_c1_g1	TraesCS2A01G360000.1	448	357	480	2.26e-34	TraesCS2A01G360000	chr2A	603855754	603856938	Cysteine-rich receptor-like protein kinase 41
	TRINITY_DN30119_c1_g1	13.7561	9.12e-17	5.57e-15	UP	NA	NA	NA	NA	NA	NA	NA	NA	NA	NA	NA
	TRINITY_DN58980_c0_g1	8.31295	9.39e-17	5.73e-15	UP	TRINITY_DN58980_c0_g1	TraesCS7A01G554600.2	6	331	561	2.88e-149	TraesCS7A01G554600	chr7A	726905999	726907908	inner centromere protein, ARK-binding region protein
	TRINITY_DN8490_c0_g1	5.26741	9.47e-17	5.77e-15	UP	TRINITY_DN8490_c0_g1	TraesCS1B01G338500.1	242	1389	1389	0	TraesCS1B01G338500	chr1B	566601377	566604244	Cysteine protease family protein
	TRINITY_DN22099_c0_g1	10.1382	9.56e-17	5.83e-15	UP	TRINITY_DN22099_c0_g1	TraesCS2A01G244000.1	443	257	693	8.4e-90	TraesCS2A01G244000	chr2A	345477958	345495950	RNA-binding family protein
	TRINITY_DN53622_c0_g1	4.18611	9.89e-17	6.01e-15	UP	TRINITY_DN53622_c0_g1	TraesCS4B01G106300.1	628	767	1140	5.06e-68	TraesCS4B01G106300	chr4B	115556448	115559956	Alcohol dehydrogenase
	TRINITY_DN71480_c0_g1	5.90597	1.02e-16	6.19e-15	UP	NA	NA	NA	NA	NA	NA	NA	NA	NA	NA	NA
	TRINITY_DN4243_c54_g1	8.04246	1.05e-16	6.34e-15	UP	TRINITY_DN4243_c54_g1	TraesCS2D01G205300.1	4305	3085	4305	0	TraesCS2D01G205300	chr2D	157119913	157124217	Retrovirus-related Pol polyprotein from transposon TNT 1-94
	TRINITY_DN12384_c0_g1	5.27	1.06e-16	6.41e-15	UP	TRINITY_DN12384_c0_g1	TraesCS3A01G138400.1	1	372	2301	0	TraesCS3A01G138400	chr3A	115839549	115842968	Subtilisin-like protease
	TRINITY_DN11369_c0_g1	4.66607	1.06e-16	6.42e-15	UP	TRINITY_DN11369_c0_g1	TraesCS7D01G438600.1	1433	1587	1587	4.73e-73	TraesCS7D01G438600	chr7D	557835765	557838778	Cytochrome P450
	TRINITY_DN66042_c1_g1	10.0853	1.06e-16	6.43e-15	UP	TRINITY_DN66042_c1_g1	TraesCS5A01G551300.1	681	467	1035	4.72e-110	TraesCS5A01G551300	chr5A	704833104	704835243	Peptidoglycan-binding LysM domain protein, putative
	TRINITY_DN30747_c0_g1	10.0825	1.1e-16	6.62e-15	UP	TRINITY_DN30747_c0_g1	TraesCS7A01G008600.1	1929	2156	2205	3.06e-102	TraesCS7A01G008600	chr7A	3845602	3850842	3-methyl-2-oxobutanoate hydroxymethyltransferase
	TRINITY_DN4633_c0_g1	5.64183	1.14e-16	6.88e-15	UP	TRINITY_DN4633_c0_g1	TraesCS6D01G097400.1	127	193	603	5.22e-27	TraesCS6D01G097400	chr6D	61141650	61143727	Activator of 90 kDa heat shock protein ATPase
	TRINITY_DN4447_c1_g1	8.60981	1.15e-16	6.92e-15	UP	TRINITY_DN4447_c1_g1	TraesCS1B01G439100.1	1312	1406	1419	4.93e-29	TraesCS1B01G439100	chr1B	660914516	660916771	Disease resistance protein (TIR-NBS-LRR class) family
	TRINITY_DN38275_c0_g1	8.12074	1.15e-16	6.92e-15	UP	TRINITY_DN38275_c0_g1	TraesCS3A01G352200.1	805	897	1371	5.51e-42	TraesCS3A01G352200	chr3A	600316860	600319906	Carboxypeptidase
	TRINITY_DN18001_c0_g1	5.72021	1.15e-16	6.94e-15	UP	NA	NA	NA	NA	NA	NA	NA	NA	NA	NA	NA
	TRINITY_DN34068_c0_g1	12.3886	1.17e-16	7.04e-15	UP	NA	NA	NA	NA	NA	NA	NA	NA	NA	NA	NA
	TRINITY_DN28532_c0_g1	5.17265	1.18e-16	7.11e-15	UP	TRINITY_DN28532_c0_g1	TraesCS3A01G232100.1	1396	1485	1485	2.23e-40	TraesCS3A01G232100	chr3A	433551131	433556520	Zinc finger protein ZPR1
	TRINITY_DN26964_c0_g1	10.4301	1.23e-16	7.35e-15	UP	NA	NA	NA	NA	NA	NA	NA	NA	NA	NA	NA
	TRINITY_DN1602_c1_g1	8.41371	1.24e-16	7.42e-15	UP	TRINITY_DN1602_c1_g1	TraesCS7B01G430700.1	193	356	369	2.15e-81	TraesCS7B01G430700	chr7B	699148596	699156433	ENTH/ANTH/VHS superfamily protein
	TRINITY_DN4156_c2_g1	3.92446	1.26e-16	7.55e-15	UP	TRINITY_DN4156_c2_g1	TraesCS2D01G502700.1	1	92	495	1.64e-41	TraesCS2D01G502700	chr2D	596252301	596254507	Universal stress family protein
	TRINITY_DN52499_c0_g1	10.0829	1.28e-16	7.66e-15	UP	TRINITY_DN52499_c0_g1	TraesCS6D01G366200.1	231	744	1038	0	TraesCS6D01G366200	chr6D	454825860	454827264	Cinnamoyl CoA reductase
	TRINITY_DN32217_c0_g1	10.651	1.29e-16	7.69e-15	UP	TRINITY_DN32217_c0_g1	TraesCS4D01G209700.1	649	506	1146	6.84e-69	TraesCS4D01G209700	chr4D	360953251	360956001	Hsp70 nucleotide exchange factor fes1
	TRINITY_DN15085_c0_g1	4.07974	1.29e-16	7.71e-15	UP	TRINITY_DN15085_c0_g1	TraesCS1D01G102400.1	132	1	759	7.23e-64	TraesCS1D01G102400	chr1D	90639927	90641876	Rubber elongation factor protein, putative
	TRINITY_DN30360_c0_g1	10.0685	1.34e-16	7.95e-15	UP	NA	NA	NA	NA	NA	NA	NA	NA	NA	NA	NA
	TRINITY_DN46629_c0_g1	5.1053	1.34e-16	7.95e-15	UP	TRINITY_DN46629_c0_g1	TraesCS4B01G361200.1	92	834	834	0	TraesCS4B01G361200	chr4B	650705778	650707007	LOB domain-containing protein
	TRINITY_DN38868_c0_g2	6.40428	1.36e-16	8.1e-15	UP	TRINITY_DN38868_c0_g2	TraesCS1A01G038800.1	3	291	291	1.14e-93	TraesCS1A01G038800	chr1A	21085585	21085875	UDP-N-acetylenolpyruvoylglucosamine reductase
	TRINITY_DN14053_c2_g1	7.97635	1.39e-16	8.25e-15	UP	NA	NA	NA	NA	NA	NA	NA	NA	NA	NA	NA
	TRINITY_DN7354_c0_g1	5.00171	1.41e-16	8.36e-15	UP	TRINITY_DN7354_c0_g1	TraesCS1A01G317200.1	1	40	933	5.68e-12	TraesCS1A01G317200	chr1A	508641117	508642831	DCD (Development and cell death) domain protein
	TRINITY_DN5528_c0_g1	4.17441	1.42e-16	8.41e-15	UP	TRINITY_DN5528_c0_g1	TraesCS4D01G236400.2	1	1320	1320	0	TraesCS4D01G236400	chr4D	398293560	398295749	Poly [ADP-ribose] polymerase
	TRINITY_DN18959_c0_g1	9.84772	1.46e-16	8.65e-15	UP	TRINITY_DN18959_c0_g1	TraesCS6A01G001200.1	315	534	900	1.83e-74	TraesCS6A01G001200	chr6A	734214	735473	Zinc finger protein 512B family
	TRINITY_DN99679_c3_g1	10.6978	1.48e-16	8.77e-15	UP	TRINITY_DN99679_c3_g1	TraesCS1D01G121000.1	1320	1380	2508	2.1e-24	TraesCS1D01G121000	chr1D	120533623	120538939	70 kDa heat shock protein
	TRINITY_DN72228_c0_g1	5.40221	1.48e-16	8.77e-15	UP	NA	NA	NA	NA	NA	NA	NA	NA	NA	NA	NA
	TRINITY_DN40984_c0_g1	10.94	1.5e-16	8.83e-15	UP	NA	NA	NA	NA	NA	NA	NA	NA	NA	NA	NA
	TRINITY_DN23751_c0_g1	3.98146	1.59e-16	9.38e-15	UP	TRINITY_DN23751_c0_g1	TraesCS4A01G452700.1	711	1063	1680	0	TraesCS4A01G452700	chr4A	717738477	717742320	60 kDa chaperonin
	TRINITY_DN49920_c0_g2	10.4445	1.62e-16	9.54e-15	UP	TRINITY_DN49920_c0_g2	TraesCS2B01G609600.1	810	1109	1149	1.83e-135	TraesCS2B01G609600	chr2B	789608779	789611255	Glutathione S-transferase
	TRINITY_DN17156_c0_g1	4.60411	1.62e-16	9.55e-15	UP	NA	NA	NA	NA	NA	NA	NA	NA	NA	NA	NA
	TRINITY_DN58603_c0_g1	10.1183	1.63e-16	9.59e-15	UP	NA	NA	NA	NA	NA	NA	NA	NA	NA	NA	NA
	TRINITY_DN47512_c0_g2	10.8618	1.63e-16	9.59e-15	UP	NA	NA	NA	NA	NA	NA	NA	NA	NA	NA	NA
	TRINITY_DN29395_c0_g1	7.17357	1.65e-16	9.67e-15	UP	NA	NA	NA	NA	NA	NA	NA	NA	NA	NA	NA
	TRINITY_DN97656_c0_g1	6.30874	1.68e-16	9.85e-15	UP	TRINITY_DN97656_c0_g1	TraesCS7D01G517800.1	1187	1336	2511	9.29e-74	TraesCS7D01G517800	chr7D	616505544	616510524	Chaperone protein htpG family protein
	TRINITY_DN15095_c1_g2	4.24767	1.7e-16	9.95e-15	UP	TRINITY_DN15095_c1_g2	TraesCS2B01G012600.1	1	130	1290	2.1e-62	TraesCS2B01G012600	chr2B	6263090	6265566	StAR-related lipid transfer protein
	TRINITY_DN27551_c0_g1	7.72436	1.75e-16	1.02e-14	UP	NA	NA	NA	NA	NA	NA	NA	NA	NA	NA	NA
	TRINITY_DN25395_c0_g2	10.0509	1.75e-16	1.02e-14	UP	NA	NA	NA	NA	NA	NA	NA	NA	NA	NA	NA
	TRINITY_DN34112_c0_g1	11.5504	1.78e-16	1.04e-14	UP	NA	NA	NA	NA	NA	NA	NA	NA	NA	NA	NA
	TRINITY_DN80251_c0_g1	10.1908	1.8e-16	1.05e-14	UP	NA	NA	NA	NA	NA	NA	NA	NA	NA	NA	NA
	TRINITY_DN8513_c1_g1	10.439	1.8e-16	1.05e-14	UP	TRINITY_DN8513_c1_g1	TraesCS7A01G454600.1	431	196	966	4.27e-113	TraesCS7A01G454600	chr7A	649421394	649422598	Early nodulin-like protein
	TRINITY_DN16633_c1_g3	6.10183	1.81e-16	1.06e-14	UP	TRINITY_DN16633_c1_g3	TraesCS4A01G254800.1	227	383	384	7.37e-52	TraesCS4A01G254800	chr4A	567036537	567037063	Carboxypeptidase
	TRINITY_DN13029_c0_g1	5.3801	1.96e-16	1.13e-14	UP	TRINITY_DN13029_c0_g1	TraesCS4A01G098600.1	1452	2008	2010	0	TraesCS4A01G098600	chr4A	110636564	110639356	70 kDa heat shock protein
	TRINITY_DN594_c0_g3	10.1455	1.97e-16	1.14e-14	UP	NA	NA	NA	NA	NA	NA	NA	NA	NA	NA	NA
	TRINITY_DN384_c0_g6	8.16381	2e-16	1.16e-14	UP	TRINITY_DN384_c0_g6	TraesCS6A01G189200.1	801	849	987	2.05e-17	TraesCS6A01G189200	chr6A	235026920	235069583	magnesium transporter NIPA (DUF803)
	TRINITY_DN47602_c0_g2	10.1899	2.07e-16	1.2e-14	UP	TRINITY_DN47602_c0_g2	TraesCS1D01G376300.1	124	218	1140	7.14e-41	TraesCS1D01G376300	chr1D	452625415	452627557	Alcohol dehydrogenase
	TRINITY_DN5541_c1_g1	4.67941	2.08e-16	1.2e-14	UP	NA	NA	NA	NA	NA	NA	NA	NA	NA	NA	NA
	TRINITY_DN26155_c0_g2	10.4031	2.08e-16	1.2e-14	UP	TRINITY_DN26155_c0_g2	TraesCSU01G020600.1	1557	1831	2082	1.34e-111	TraesCSU01G020600	chrUn	22432971	22436549	Receptor-like protein kinase
	TRINITY_DN2396_c0_g1	7.67855	2.09e-16	1.21e-14	UP	TRINITY_DN2396_c0_g1	TraesCS1B01G291900.2	1245	1068	1245	6.53e-87	TraesCS1B01G291900	chr1B	509010392	509014397	Tetratricopeptide repeat (TPR)-like superfamily protein
	TRINITY_DN16358_c0_g4	8.17001	2.18e-16	1.26e-14	UP	TRINITY_DN16358_c0_g4	TraesCS1A01G370100.1	155	1	1143	2.44e-73	TraesCS1A01G370100	chr1A	547391832	547395833	Alcohol dehydrogenase
	TRINITY_DN35460_c1_g1	10.0338	2.2e-16	1.27e-14	UP	TRINITY_DN35460_c1_g1	TraesCS7D01G008500.1	342	514	1011	7.89e-68	TraesCS7D01G008500	chr7D	4024888	4029256	NAC domain protein,
	TRINITY_DN38375_c0_g1	11.1115	2.26e-16	1.3e-14	UP	TRINITY_DN38375_c0_g1	TraesCS1A01G255400.1	411	479	1410	3.38e-27	TraesCS1A01G255400	chr1A	447641144	447644004	Lipase
	TRINITY_DN1205_c1_g1	3.90369	2.48e-16	1.42e-14	UP	TRINITY_DN1205_c1_g1	TraesCS7B01G351000.1	1	611	885	0	TraesCS7B01G351000	chr7B	608192042	608194211	Phosphosulfolactate synthase-related protein
	TRINITY_DN2262_c0_g3	10.33	2.56e-16	1.47e-14	UP	NA	NA	NA	NA	NA	NA	NA	NA	NA	NA	NA
	TRINITY_DN32067_c0_g1	10.0217	2.61e-16	1.49e-14	UP	TRINITY_DN32067_c0_g1	TraesCS3A01G009200.2	3022	3081	3081	8.45e-24	TraesCS3A01G009200	chr3A	8321632	8329985	NBS-LRR-like resistance protein
	TRINITY_DN16441_c1_g2	10.0603	2.7e-16	1.54e-14	UP	TRINITY_DN16441_c1_g2	TraesCS5A01G557100.1	357	510	510	7.73e-76	TraesCS5A01G557100	chr5A	708183055	708184124	2-oxoglutarate (2OG) and Fe(II)-dependent oxygenase superfamily protein, putative
	TRINITY_DN29601_c0_g1	4.22786	2.75e-16	1.57e-14	UP	TRINITY_DN29601_c0_g1	TraesCS4B01G106300.1	434	546	1140	6.87e-50	TraesCS4B01G106300	chr4B	115556448	115559956	Alcohol dehydrogenase
	TRINITY_DN71069_c0_g1	10.3792	2.84e-16	1.62e-14	UP	NA	NA	NA	NA	NA	NA	NA	NA	NA	NA	NA
	TRINITY_DN18202_c0_g3	11.9827	2.94e-16	1.68e-14	UP	NA	NA	NA	NA	NA	NA	NA	NA	NA	NA	NA
	TRINITY_DN122023_c0_g1	6.84602	2.99e-16	1.7e-14	UP	TRINITY_DN122023_c0_g1	TraesCS1A01G225100.1	676	403	5469	2.4e-141	TraesCS1A01G225100	chr1A	395182470	395206693	Anaphase-promoting complex subunit 1
	TRINITY_DN185669_c0_g1	10.5005	3.12e-16	1.77e-14	UP	NA	NA	NA	NA	NA	NA	NA	NA	NA	NA	NA
	TRINITY_DN54856_c0_g1	10.3616	3.17e-16	1.8e-14	UP	NA	NA	NA	NA	NA	NA	NA	NA	NA	NA	NA
	TRINITY_DN37337_c0_g2	10.5313	3.25e-16	1.84e-14	UP	TRINITY_DN37337_c0_g2	TraesCS2A01G509100.1	223	120	1488	3.34e-39	TraesCS2A01G509100	chr2A	735173801	735181370	NADH-ubiquinone oxidoreductase chain 4
	TRINITY_DN22341_c0_g1	10.004	3.26e-16	1.85e-14	UP	NA	NA	NA	NA	NA	NA	NA	NA	NA	NA	NA
	TRINITY_DN33081_c0_g1	10.0069	3.29e-16	1.86e-14	UP	TRINITY_DN33081_c0_g1	TraesCS1A01G065000.1	898	936	1020	4.11e-12	TraesCS1A01G065000	chr1A	47209815	47211960	Importin subunit beta-1
	TRINITY_DN14150_c0_g5	7.39706	3.31e-16	1.87e-14	UP	TRINITY_DN14150_c0_g5	TraesCS2D01G166000.1	763	846	861	1.45e-26	TraesCS2D01G166000	chr2D	110056265	110057359	Myb/SANT-like DNA-binding domain protein
	TRINITY_DN64816_c0_g2	8.06587	3.35e-16	1.9e-14	UP	NA	NA	NA	NA	NA	NA	NA	NA	NA	NA	NA
	TRINITY_DN4461_c0_g1	5.17558	3.41e-16	1.92e-14	UP	NA	NA	NA	NA	NA	NA	NA	NA	NA	NA	NA
	TRINITY_DN30789_c0_g1	10.0401	3.45e-16	1.94e-14	UP	NA	NA	NA	NA	NA	NA	NA	NA	NA	NA	NA
	TRINITY_DN9021_c0_g3	8.93136	3.48e-16	1.96e-14	UP	TRINITY_DN9021_c0_g3	TraesCS4A01G163000.1	1121	1221	3354	2.13e-42	TraesCS4A01G163000	chr4A	362065937	362113687	Ubiquitin carboxyl-terminal hydrolase family protein, expressed
	TRINITY_DN2709_c0_g1	4.94468	3.53e-16	1.99e-14	UP	TRINITY_DN2709_c0_g1	TraesCS3A01G180900.1	72	408	408	5.83e-170	TraesCS3A01G180900	chr3A	208724670	208734181	Transmembrane protein, putative
	TRINITY_DN16112_c0_g1	6.10806	3.55e-16	2e-14	UP	NA	NA	NA	NA	NA	NA	NA	NA	NA	NA	NA
	TRINITY_DN22758_c0_g1	5.5506	3.56e-16	2e-14	UP	NA	NA	NA	NA	NA	NA	NA	NA	NA	NA	NA
	TRINITY_DN262845_c0_g1	4.75566	3.68e-16	2.06e-14	UP	TRINITY_DN262845_c0_g1	TraesCS2A01G143200.1	1062	978	1062	9.09e-38	TraesCS2A01G143200	chr2A	88280830	88281891	Gibberellin receptor GID1A
	TRINITY_DN16121_c1_g1	7.39456	3.77e-16	2.11e-14	UP	NA	NA	NA	NA	NA	NA	NA	NA	NA	NA	NA
	TRINITY_DN66542_c0_g1	10.1535	3.77e-16	2.11e-14	UP	NA	NA	NA	NA	NA	NA	NA	NA	NA	NA	NA
	TRINITY_DN1058_c0_g1	5.08004	3.86e-16	2.16e-14	UP	TRINITY_DN1058_c0_g1	TraesCS2B01G225900.1	627	677	873	2.14e-18	TraesCS2B01G225900	chr2B	216708391	216711242	Aquaporin
	TRINITY_DN170143_c0_g1	10.0164	3.86e-16	2.16e-14	UP	TRINITY_DN170143_c0_g1	TraesCS1A01G049700.1	270	336	1029	9.41e-28	TraesCS1A01G049700	chr1A	31779184	31781721	Arginine/serine-rich splicing factor, putative
	TRINITY_DN42439_c0_g1	10.0096	4.21e-16	2.35e-14	UP	TRINITY_DN42439_c0_g1	TraesCS7D01G266900.1	1108	1024	1116	1.94e-27	TraesCS7D01G266900	chr7D	249606242	249621410	F-box protein
	TRINITY_DN60148_c1_g1	11.0328	4.33e-16	2.41e-14	UP	TRINITY_DN60148_c1_g1	TraesCS2D01G533900.1	1	108	246	5.35e-50	TraesCS2D01G533900	chr2D	618062046	618062291	Wound-responsive family protein
	TRINITY_DN33020_c0_g1	5.60485	4.46e-16	2.49e-14	UP	TRINITY_DN33020_c0_g1	TraesCS4A01G313400.1	300	543	543	1.33e-125	TraesCS4A01G313400	chr4A	604068519	604069061	AWPM-19-like membrane family protein
	TRINITY_DN37388_c0_g4	6.55513	4.63e-16	2.57e-14	UP	TRINITY_DN37388_c0_g4	TraesCS2B01G144800.1	859	756	1068	1.14e-41	TraesCS2B01G144800	chr2B	110755392	110756975	Glutathione S-transferase T3
	TRINITY_DN43988_c1_g1	10.1391	4.78e-16	2.65e-14	UP	NA	NA	NA	NA	NA	NA	NA	NA	NA	NA	NA
	TRINITY_DN20095_c0_g1	7.48154	4.79e-16	2.65e-14	UP	TRINITY_DN20095_c0_g1	TraesCS7D01G479300.1	287	188	1368	2.5e-28	TraesCS7D01G479300	chr7D	590447268	590454785	GTPase obg
	TRINITY_DN10870_c0_g1	7.86873	4.87e-16	2.7e-14	UP	NA	NA	NA	NA	NA	NA	NA	NA	NA	NA	NA
	TRINITY_DN6521_c1_g1	5.98959	5.02e-16	2.77e-14	UP	TRINITY_DN6521_c1_g1	TraesCS5B01G503400.1	290	399	399	6.29e-48	TraesCS5B01G503400	chr5B	670019115	670020322	DNA polymerase epsilon catalytic subunit A, putative
	TRINITY_DN57146_c0_g1	7.5915	5.07e-16	2.8e-14	UP	TRINITY_DN57146_c0_g1	TraesCS3D01G118300.1	1137	894	1491	4.12e-126	TraesCS3D01G118300	chr3D	72252014	72253630	Transcription factor, putative
	TRINITY_DN37760_c0_g1	5.72849	5.17e-16	2.85e-14	UP	NA	NA	NA	NA	NA	NA	NA	NA	NA	NA	NA
	TRINITY_DN20424_c0_g2	10.8678	5.17e-16	2.85e-14	UP	TRINITY_DN20424_c0_g2	TraesCS3A01G352300.1	349	427	510	3.86e-34	TraesCS3A01G352300	chr3A	600321687	600323239	ATP-dependent Clp protease adapter protein ClpS
	TRINITY_DN21452_c0_g2	10.8346	5.22e-16	2.87e-14	UP	NA	NA	NA	NA	NA	NA	NA	NA	NA	NA	NA
	TRINITY_DN24382_c1_g1	11.131	5.34e-16	2.94e-14	UP	NA	NA	NA	NA	NA	NA	NA	NA	NA	NA	NA
	TRINITY_DN11964_c2_g1	10.0692	5.48e-16	3.01e-14	UP	TRINITY_DN11964_c2_g1	TraesCS2D01G362000.3	1	352	645	1.63e-146	TraesCS2D01G362000	chr2D	468095854	468097899	Coiled-coil domain-containing protein 94-like protein
	TRINITY_DN153657_c1_g1	10.4827	5.54e-16	3.04e-14	UP	NA	NA	NA	NA	NA	NA	NA	NA	NA	NA	NA
	TRINITY_DN46171_c0_g1	9.98337	5.68e-16	3.12e-14	UP	TRINITY_DN46171_c0_g1	TraesCS3A01G358800.1	171	231	771	1.91e-24	TraesCS3A01G358800	chr3A	606824097	606825174	ENTH/VHS family protein
	TRINITY_DN8673_c1_g1	10.5462	5.7e-16	3.13e-14	UP	NA	NA	NA	NA	NA	NA	NA	NA	NA	NA	NA
	TRINITY_DN65920_c0_g1	3.97617	5.72e-16	3.14e-14	UP	NA	NA	NA	NA	NA	NA	NA	NA	NA	NA	NA
	TRINITY_DN47512_c1_g1	9.96767	5.76e-16	3.16e-14	UP	NA	NA	NA	NA	NA	NA	NA	NA	NA	NA	NA
	TRINITY_DN45539_c0_g2	10.3405	5.8e-16	3.18e-14	UP	TRINITY_DN45539_c0_g2	TraesCS2D01G527800.1	361	1	1326	0	TraesCS2D01G527800	chr2D	615466581	615471485	Anthocyanin 5-aromatic acyltransferase
	TRINITY_DN8972_c0_g1	8.68379	6.11e-16	3.35e-14	UP	NA	NA	NA	NA	NA	NA	NA	NA	NA	NA	NA
	TRINITY_DN24887_c0_g1	7.81793	6.35e-16	3.48e-14	UP	NA	NA	NA	NA	NA	NA	NA	NA	NA	NA	NA
	TRINITY_DN488_c0_g1	3.80001	6.57e-16	3.59e-14	UP	TRINITY_DN488_c0_g1	TraesCS5D01G420700.1	3	336	336	1.49e-163	TraesCS5D01G420700	chr5D	481164256	481165387	Chaperone protein dnaJ, putative
	TRINITY_DN1221_c1_g1	10.0474	6.69e-16	3.65e-14	UP	NA	NA	NA	NA	NA	NA	NA	NA	NA	NA	NA
	TRINITY_DN11112_c0_g2	4.03057	6.88e-16	3.75e-14	UP	TRINITY_DN11112_c0_g2	TraesCS1A01G093800.1	245	305	759	8.96e-24	TraesCS1A01G093800	chr1A	86639280	86640857	Rubber elongation factor protein, putative
	TRINITY_DN504_c0_g1	4.13035	6.89e-16	3.76e-14	UP	TRINITY_DN504_c0_g1	TraesCS1D01G102400.1	1	759	759	0	TraesCS1D01G102400	chr1D	90639927	90641876	Rubber elongation factor protein, putative
	TRINITY_DN44228_c0_g1	9.95527	6.97e-16	3.8e-14	UP	TRINITY_DN44228_c0_g1	TraesCS7D01G159800.1	561	625	2481	1.37e-26	TraesCS7D01G159800	chr7D	109171105	109175167	Sucrose synthase
	TRINITY_DN74336_c0_g1	4.55542	7.01e-16	3.82e-14	UP	TRINITY_DN74336_c0_g1	TraesCS4A01G321300.1	1291	1351	1710	4.85e-24	TraesCS4A01G321300	chr4A	609804687	609807321	Poly [ADP-ribose] polymerase
	TRINITY_DN3019_c0_g3	4.88299	7.13e-16	3.88e-14	UP	NA	NA	NA	NA	NA	NA	NA	NA	NA	NA	NA
	TRINITY_DN15700_c0_g2	8.83614	7.19e-16	3.9e-14	UP	TRINITY_DN15700_c0_g2	TraesCS6B01G423700.1	1	292	450	4.22e-109	TraesCS6B01G423700	chr6B	693473689	693474138	PPPDE peptidase domain-containing 2
	TRINITY_DN133181_c4_g1	8.1341	7.35e-16	3.99e-14	UP	TRINITY_DN133181_c4_g1	TraesCS5A01G383800.1	931	741	1119	5.41e-85	TraesCS5A01G383800	chr5A	581487008	581488298	Heat shock transcription factor
	TRINITY_DN13771_c0_g7	8.81487	7.47e-16	4.05e-14	UP	TRINITY_DN13771_c0_g7	TraesCS6A01G374800.1	1	52	321	1.12e-17	TraesCS6A01G374800	chr6A	597362227	597362547	L-arabinose isomerase
	TRINITY_DN29021_c0_g2	10.1828	7.55e-16	4.09e-14	UP	TRINITY_DN29021_c0_g2	TraesCS2A01G273500.1	157	425	432	1.91e-16	TraesCS2A01G273500	chr2A	447947623	447948054	Transposon TX1 uncharacterized
	TRINITY_DN59293_c0_g1	11.2996	7.56e-16	4.09e-14	UP	TRINITY_DN59293_c0_g1	TraesCS4A01G087800.1	3184	3256	3840	4.45e-31	TraesCS4A01G087800	chr4A	92725327	92740345	Replication factor C large subunit
	TRINITY_DN31308_c0_g1	10.1634	7.71e-16	4.17e-14	UP	TRINITY_DN31308_c0_g1	TraesCS7B01G149300.1	223	1	1794	2.28e-113	TraesCS7B01G149300	chr7B	196911352	196913145	Pentatricopeptide repeat-containing protein
	TRINITY_DN3106_c0_g1	3.42313	7.75e-16	4.18e-14	UP	TRINITY_DN3106_c0_g1	TraesCS4D01G293200.1	781	1323	1323	0	TraesCS4D01G293200	chr4D	464152850	464157335	Kinase-like protein
	TRINITY_DN15598_c0_g2	7.31138	8.04e-16	4.34e-14	UP	TRINITY_DN15598_c0_g2	TraesCS3D01G020500.1	1	357	357	9.12e-177	TraesCS3D01G020500	chr3D	6949739	6950095	Cysteine proteinase inhibitor
	TRINITY_DN6176_c0_g1	3.93231	8.07e-16	4.35e-14	UP	TRINITY_DN6176_c0_g1	TraesCS7D01G383300.1	1	236	708	1.2e-121	TraesCS7D01G383300	chr7D	497045623	497046528	Germin-like protein
	TRINITY_DN43052_c1_g2	11.4527	8.33e-16	4.48e-14	UP	TRINITY_DN43052_c1_g2	TraesCS6D01G103200.1	30	2	1188	1.33e-06	TraesCS6D01G103200	chr6D	67319251	67321856	F-box domain containing protein
	TRINITY_DN4438_c1_g1	3.51188	8.4e-16	4.52e-14	UP	TRINITY_DN4438_c1_g1	TraesCS7B01G483100.1	319	507	507	2.57e-75	TraesCS7B01G483100	chr7B	741247390	741249665	4-hydroxy-4-methyl-2-oxoglutarate aldolase
	TRINITY_DN185773_c0_g1	5.78626	8.42e-16	4.53e-14	UP	NA	NA	NA	NA	NA	NA	NA	NA	NA	NA	NA
	TRINITY_DN15981_c0_g1	3.90425	8.58e-16	4.61e-14	UP	TRINITY_DN15981_c0_g1	TraesCS5A01G193900.1	33	163	1107	8.06e-58	TraesCS5A01G193900	chr5A	397249747	397251733	Alcohol dehydrogenase
	TRINITY_DN19063_c0_g2	4.19903	8.63e-16	4.63e-14	UP	NA	NA	NA	NA	NA	NA	NA	NA	NA	NA	NA
	TRINITY_DN9550_c2_g2	6.72498	8.65e-16	4.64e-14	UP	TRINITY_DN9550_c2_g2	TraesCS5A01G176500.1	231	273	300	3.57e-07	TraesCS5A01G176500	chr5A	371031555	371032032	MYB-related transcription factor
	TRINITY_DN17714_c0_g1	4.15494	8.71e-16	4.66e-14	UP	TRINITY_DN17714_c0_g1	TraesCS4B01G106300.1	948	1024	1140	3.38e-33	TraesCS4B01G106300	chr4B	115556448	115559956	Alcohol dehydrogenase
	TRINITY_DN59183_c0_g1	8.28168	8.76e-16	4.68e-14	UP	NA	NA	NA	NA	NA	NA	NA	NA	NA	NA	NA
	TRINITY_DN122349_c0_g1	10.1317	8.8e-16	4.7e-14	UP	NA	NA	NA	NA	NA	NA	NA	NA	NA	NA	NA
	TRINITY_DN94651_c1_g1	12.4954	8.99e-16	4.8e-14	UP	NA	NA	NA	NA	NA	NA	NA	NA	NA	NA	NA
	TRINITY_DN2223_c1_g3	10.0855	9.15e-16	4.88e-14	UP	NA	NA	NA	NA	NA	NA	NA	NA	NA	NA	NA
	TRINITY_DN4626_c2_g1	10.3722	9.46e-16	5.04e-14	UP	NA	NA	NA	NA	NA	NA	NA	NA	NA	NA	NA
	TRINITY_DN25681_c1_g1	10.357	9.48e-16	5.05e-14	UP	TRINITY_DN25681_c1_g1	TraesCS2D01G162800.1	958	1270	1602	2.43e-154	TraesCS2D01G162800	chr2D	107027637	107029238	Cytochrome P450 family cinnamate 4-hydroxylase
	TRINITY_DN14418_c0_g1	7.93895	9.56e-16	5.09e-14	UP	NA	NA	NA	NA	NA	NA	NA	NA	NA	NA	NA
	TRINITY_DN89580_c0_g3	9.94025	1.01e-15	5.37e-14	UP	TRINITY_DN89580_c0_g3	TraesCS6A01G421100.1	1	186	1128	6.27e-94	TraesCS6A01G421100	chr6A	617686259	617687386	Homoserine kinase
	TRINITY_DN14951_c0_g1	3.99382	1.03e-15	5.46e-14	UP	NA	NA	NA	NA	NA	NA	NA	NA	NA	NA	NA
	TRINITY_DN90797_c0_g1	10.7122	1.03e-15	5.48e-14	UP	TRINITY_DN90797_c0_g1	TraesCS3B01G514800.1	1149	1209	1209	2.02e-24	TraesCS3B01G514800	chr3B	757472872	757474080	Eukaryotic aspartyl protease family protein
	TRINITY_DN4880_c0_g2	5.68773	1.04e-15	5.51e-14	UP	TRINITY_DN4880_c0_g2	TraesCS3B01G510700.1	348	133	348	7.19e-82	TraesCS3B01G510700	chr3B	754874453	754875695	Coatomer, beta' subunit
	TRINITY_DN26381_c0_g1	8.06282	1.05e-15	5.57e-14	UP	TRINITY_DN26381_c0_g1	TraesCS4A01G328600.1	358	432	1257	3.74e-32	TraesCS4A01G328600	chr4A	614106743	614108525	Ankyrin repeat domain protein, putative
	TRINITY_DN17542_c0_g3	7.25761	1.06e-15	5.63e-14	UP	NA	NA	NA	NA	NA	NA	NA	NA	NA	NA	NA
	TRINITY_DN14359_c0_g1	5.98956	1.06e-15	5.63e-14	UP	TRINITY_DN14359_c0_g1	TraesCS7D01G484800.1	1086	791	1086	2.06e-154	TraesCS7D01G484800	chr7D	595309908	595312126	Dihydroflavonol 4-reductase
	TRINITY_DN18143_c0_g1	3.91418	1.07e-15	5.65e-14	UP	TRINITY_DN18143_c0_g1	TraesCS5A01G251000.1	1951	2037	2346	1.52e-35	TraesCS5A01G251000	chr5A	466613864	466618092	Chaperone protein htpG family protein
	TRINITY_DN5396_c0_g1	4.70647	1.1e-15	5.82e-14	UP	TRINITY_DN5396_c0_g1	TraesCS2B01G331300.1	570	486	570	2.31e-28	TraesCS2B01G331300	chr2B	474909947	474910516	Protein Ycf2
	TRINITY_DN87709_c0_g1	6.74822	1.15e-15	6.05e-14	UP	TRINITY_DN87709_c0_g1	TraesCS1A01G416600.1	29	1	270	6.34e-06	TraesCS1A01G416600	chr1A	574934591	574935614	Transcription elongation factor 1
	TRINITY_DN2359_c0_g2	4.26836	1.17e-15	6.15e-14	UP	TRINITY_DN2359_c0_g2	TraesCS7A01G242200.1	1930	2103	2103	2.3e-79	TraesCS7A01G242200	chr7A	217555694	217559742	Heat shock protein 90
	TRINITY_DN22870_c2_g1	10.3905	1.17e-15	6.16e-14	UP	NA	NA	NA	NA	NA	NA	NA	NA	NA	NA	NA
	TRINITY_DN28550_c0_g3	10.0977	1.17e-15	6.18e-14	UP	TRINITY_DN28550_c0_g3	TraesCS7D01G510400.1	2290	2066	2505	1.37e-115	TraesCS7D01G510400	chr7D	613447359	613453491	Transcriptional corepressor SEUSS
	TRINITY_DN23932_c2_g3	7.24392	1.18e-15	6.22e-14	UP	TRINITY_DN23932_c2_g3	TraesCS2A01G531500.1	178	238	273	1.28e-15	TraesCS2A01G531500	chr2A	748542328	748542600	Wound-responsive family protein
	TRINITY_DN67830_c0_g1	7.34066	1.21e-15	6.37e-14	UP	NA	NA	NA	NA	NA	NA	NA	NA	NA	NA	NA
	TRINITY_DN25934_c0_g1	4.79428	1.22e-15	6.42e-14	UP	TRINITY_DN25934_c0_g1	TraesCS6B01G418400.1	154	211	1344	1.39e-22	TraesCS6B01G418400	chr6B	690558885	690561813	COBRA-like protein
	TRINITY_DN4733_c0_g1	3.43012	1.22e-15	6.42e-14	UP	TRINITY_DN4733_c0_g1	TraesCS6D01G364400.1	888	1344	1344	0	TraesCS6D01G364400	chr6D	454230135	454233225	COBRA-like protein
	TRINITY_DN39911_c0_g1	10.5379	1.23e-15	6.46e-14	UP	TRINITY_DN39911_c0_g1	TraesCS5D01G479300.1	11	82	291	1.02e-28	TraesCS5D01G479300	chr5D	517590629	517591231	Wound-induced protease inhibitor
	TRINITY_DN5245_c2_g4	11.5902	1.24e-15	6.51e-14	UP	NA	NA	NA	NA	NA	NA	NA	NA	NA	NA	NA
	TRINITY_DN93334_c0_g1	6.15436	1.25e-15	6.53e-14	UP	NA	NA	NA	NA	NA	NA	NA	NA	NA	NA	NA
	TRINITY_DN21870_c0_g1	10.1089	1.25e-15	6.53e-14	UP	NA	NA	NA	NA	NA	NA	NA	NA	NA	NA	NA
	TRINITY_DN202040_c0_g1	6.63746	1.25e-15	6.54e-14	UP	NA	NA	NA	NA	NA	NA	NA	NA	NA	NA	NA
	TRINITY_DN32672_c0_g2	3.40161	1.27e-15	6.63e-14	UP	TRINITY_DN32672_c0_g2	TraesCS2B01G530200.1	987	580	987	0	TraesCS2B01G530200	chr2B	725107374	725111237	Peroxidase
	TRINITY_DN32631_c2_g1	10.1041	1.29e-15	6.72e-14	UP	NA	NA	NA	NA	NA	NA	NA	NA	NA	NA	NA
	TRINITY_DN7048_c2_g1	9.93925	1.29e-15	6.72e-14	UP	NA	NA	NA	NA	NA	NA	NA	NA	NA	NA	NA
	TRINITY_DN11897_c1_g1	8.36642	1.29e-15	6.75e-14	UP	TRINITY_DN11897_c1_g1	TraesCS5B01G350300.1	266	98	348	1.85e-56	TraesCS5B01G350300	chr5B	531217275	531217622	1-(5-phosphoribosyl)-5-[(5-phosphoribosylamino)methylideneamino] imidazole-4-carboxamide isomerase
	TRINITY_DN7661_c0_g1	10.1873	1.3e-15	6.77e-14	UP	NA	NA	NA	NA	NA	NA	NA	NA	NA	NA	NA
	TRINITY_DN29907_c0_g1	3.90511	1.3e-15	6.78e-14	UP	TRINITY_DN29907_c0_g1	TraesCS1A01G285000.1	211	415	1845	8.92e-103	TraesCS1A01G285000	chr1A	482335991	482338978	70 kDa heat shock protein
	TRINITY_DN6257_c2_g1	10.0492	1.32e-15	6.87e-14	UP	NA	NA	NA	NA	NA	NA	NA	NA	NA	NA	NA
	TRINITY_DN14761_c0_g4	12.1196	1.35e-15	7.03e-14	UP	NA	NA	NA	NA	NA	NA	NA	NA	NA	NA	NA
	TRINITY_DN63897_c1_g1	11.3713	1.36e-15	7.06e-14	UP	NA	NA	NA	NA	NA	NA	NA	NA	NA	NA	NA
	TRINITY_DN28383_c1_g2	6.47209	1.36e-15	7.07e-14	UP	NA	NA	NA	NA	NA	NA	NA	NA	NA	NA	NA
	TRINITY_DN24836_c0_g1	10.2365	1.38e-15	7.15e-14	UP	TRINITY_DN24836_c0_g1	TraesCS2D01G245600.2	2747	2793	2796	4.1e-16	TraesCS2D01G245600	chr2D	282920455	282934954	DNA damage-binding protein
	TRINITY_DN25198_c0_g4	8.59278	1.38e-15	7.16e-14	UP	NA	NA	NA	NA	NA	NA	NA	NA	NA	NA	NA
	TRINITY_DN187121_c0_g1	10.3405	1.38e-15	7.19e-14	UP	NA	NA	NA	NA	NA	NA	NA	NA	NA	NA	NA
	TRINITY_DN16218_c0_g6	10.6965	1.41e-15	7.33e-14	UP	NA	NA	NA	NA	NA	NA	NA	NA	NA	NA	NA
	TRINITY_DN10152_c0_g1	7.45563	1.49e-15	7.69e-14	UP	TRINITY_DN10152_c0_g1	TraesCS3B01G090800.1	1553	1778	1878	1.03e-70	TraesCS3B01G090800	chr3B	59749640	59755206	Polyadenylate-binding protein
	TRINITY_DN4208_c0_g1	3.96823	1.49e-15	7.69e-14	UP	TRINITY_DN4208_c0_g1	TraesCS6D01G349500.1	1	537	537	0	TraesCS6D01G349500	chr6D	447278039	447278902	Serine-rich protein
	TRINITY_DN21680_c0_g1	4.40551	1.5e-15	7.73e-14	UP	TRINITY_DN21680_c0_g1	TraesCS7B01G351000.1	338	398	885	8.49e-23	TraesCS7B01G351000	chr7B	608192042	608194211	Phosphosulfolactate synthase-related protein
	TRINITY_DN3076_c3_g1	11.3274	1.52e-15	7.86e-14	UP	NA	NA	NA	NA	NA	NA	NA	NA	NA	NA	NA
	TRINITY_DN34855_c0_g1	10.0414	1.52e-15	7.86e-14	UP	NA	NA	NA	NA	NA	NA	NA	NA	NA	NA	NA
	TRINITY_DN27262_c0_g2	3.59668	1.52e-15	7.86e-14	UP	NA	NA	NA	NA	NA	NA	NA	NA	NA	NA	NA
	TRINITY_DN22892_c0_g1	7.79917	1.53e-15	7.88e-14	UP	TRINITY_DN22892_c0_g1	TraesCS7B01G388700.1	2455	2674	3873	2.09e-112	TraesCS7B01G388700	chr7B	654949049	654953437	BAG family molecular chaperone regulator 6
	TRINITY_DN5577_c0_g2	10.0836	1.54e-15	7.93e-14	UP	TRINITY_DN5577_c0_g2	TraesCS6B01G270600.1	1617	1697	2091	1.85e-25	TraesCS6B01G270600	chr6B	487534568	487541541	N6-adenosine-methyltransferase MT-A70-like protein
	TRINITY_DN41999_c3_g1	9.91512	1.58e-15	8.14e-14	UP	TRINITY_DN41999_c3_g1	TraesCS2A01G485700.2	17	74	2250	2.58e-07	TraesCS2A01G485700	chr2A	721104305	721107040	Serine/threonine-protein kinase
	TRINITY_DN24560_c0_g1	4.86158	1.59e-15	8.17e-14	UP	TRINITY_DN24560_c0_g1	TraesCS1A01G259100.1	18	819	819	0	TraesCS1A01G259100	chr1A	452051876	452052694	DNA ligase 1
	TRINITY_DN17034_c0_g1	10.2082	1.67e-15	8.58e-14	UP	TRINITY_DN17034_c0_g1	TraesCS7A01G011700.1	3435	3597	3597	8.23e-81	TraesCS7A01G011700	chr7A	5077922	5086332	Acetyl-coenzyme A synthetase
	TRINITY_DN11806_c0_g2	3.98027	1.7e-15	8.72e-14	UP	TRINITY_DN11806_c0_g2	TraesCS3B01G440600.1	1004	748	1143	2.68e-108	TraesCS3B01G440600	chr3B	680252643	680254869	F-box family protein
	TRINITY_DN68801_c0_g2	9.344	1.76e-15	9.02e-14	UP	NA	NA	NA	NA	NA	NA	NA	NA	NA	NA	NA
	TRINITY_DN36925_c0_g1	9.88561	1.81e-15	9.26e-14	UP	NA	NA	NA	NA	NA	NA	NA	NA	NA	NA	NA
	TRINITY_DN21524_c0_g1	6.85076	1.83e-15	9.32e-14	UP	TRINITY_DN21524_c0_g1	TraesCS6A01G109000.1	257	351	627	6.56e-40	TraesCS6A01G109000	chr6A	77785455	77788902	Activator of 90 kDa heat shock protein ATPase
	TRINITY_DN31935_c0_g1	5.69217	1.83e-15	9.33e-14	UP	TRINITY_DN31935_c0_g1	TraesCS5D01G393600.1	1	93	750	3.36e-42	TraesCS5D01G393600	chr5D	461912557	461913422	Bax inhibitor-1 family protein
	TRINITY_DN38356_c0_g1	5.54891	1.84e-15	9.4e-14	UP	TRINITY_DN38356_c0_g1	TraesCS6A01G243300.1	819	458	819	0	TraesCS6A01G243300	chr6A	454711792	454712610	Ethylene-responsive transcription factor
	TRINITY_DN5570_c0_g3	10.2271	1.87e-15	9.53e-14	UP	NA	NA	NA	NA	NA	NA	NA	NA	NA	NA	NA
	TRINITY_DN106463_c0_g1	6.09914	1.91e-15	9.72e-14	UP	TRINITY_DN106463_c0_g1	TraesCS2D01G534200.1	1	88	273	2.06e-34	TraesCS2D01G534200	chr2D	618132569	618132841	Wound-responsive family protein
	TRINITY_DN43198_c0_g3	5.08515	1.93e-15	9.8e-14	UP	NA	NA	NA	NA	NA	NA	NA	NA	NA	NA	NA
	TRINITY_DN67772_c0_g1	4.93911	1.93e-15	9.8e-14	UP	NA	NA	NA	NA	NA	NA	NA	NA	NA	NA	NA
	TRINITY_DN77687_c0_g2	10.1695	1.96e-15	9.97e-14	UP	NA	NA	NA	NA	NA	NA	NA	NA	NA	NA	NA
	TRINITY_DN19072_c0_g1	10.2347	1.97e-15	1e-13	UP	TRINITY_DN19072_c0_g1	TraesCS6A01G397500.1	589	971	1596	0	TraesCS6A01G397500	chr6A	608967640	608969349	F-box/RNI-like/FBD-like domains-containing protein
	TRINITY_DN79608_c0_g1	9.9668	2.01e-15	1.02e-13	UP	TRINITY_DN79608_c0_g1	TraesCS2A01G249400.1	166	438	1104	3.54e-142	TraesCS2A01G249400	chr2A	374720811	374721914	core-2/I-branching beta-1,6-N-acetylglucosaminyltransferase family protein
	TRINITY_DN2762_c1_g1	4.23271	2.03e-15	1.03e-13	UP	TRINITY_DN2762_c1_g1	TraesCS1D01G121000.1	2165	2508	2508	1.82e-175	TraesCS1D01G121000	chr1D	120533623	120538939	70 kDa heat shock protein
	TRINITY_DN17560_c0_g1	10.2339	2.03e-15	1.03e-13	UP	NA	NA	NA	NA	NA	NA	NA	NA	NA	NA	NA
	TRINITY_DN4503_c0_g1	7.79589	2.05e-15	1.03e-13	UP	TRINITY_DN4503_c0_g1	TraesCS5D01G345700.1	214	250	282	6.84e-06	TraesCS5D01G345700	chr5D	432423271	432423552	50S ribosomal protein L23
	TRINITY_DN89480_c0_g2	5.43392	2.13e-15	1.08e-13	UP	TRINITY_DN89480_c0_g2	TraesCS5D01G031600.1	1	316	888	2.03e-152	TraesCS5D01G031600	chr5D	28938583	28940781	2-aminoethanethiol dioxygenase
	TRINITY_DN79102_c0_g1	10.2424	2.17e-15	1.1e-13	UP	NA	NA	NA	NA	NA	NA	NA	NA	NA	NA	NA
	TRINITY_DN181577_c0_g1	9.87275	2.17e-15	1.1e-13	UP	NA	NA	NA	NA	NA	NA	NA	NA	NA	NA	NA
	TRINITY_DN25324_c0_g1	10.1096	2.24e-15	1.13e-13	UP	TRINITY_DN25324_c0_g1	TraesCS7A01G528700.1	197	423	423	1.28e-104	TraesCS7A01G528700	chr7A	708913267	708919696	Chaperone protein dnaJ
	TRINITY_DN54149_c0_g1	10.0787	2.31e-15	1.16e-13	UP	TRINITY_DN54149_c0_g1	TraesCS5A01G251000.1	623	681	2346	3.17e-23	TraesCS5A01G251000	chr5A	466613864	466618092	Chaperone protein htpG family protein
	TRINITY_DN3636_c0_g3	10.0297	2.32e-15	1.16e-13	UP	TRINITY_DN3636_c0_g3	TraesCS5D01G074200.1	1	119	282	4.99e-45	TraesCS5D01G074200	chr5D	73399370	73400010	zinc finger WD40 repeat protein 1
	TRINITY_DN8317_c0_g3	12.261	2.42e-15	1.21e-13	UP	NA	NA	NA	NA	NA	NA	NA	NA	NA	NA	NA
	TRINITY_DN100809_c0_g4	10.1262	2.42e-15	1.21e-13	UP	TRINITY_DN100809_c0_g4	TraesCS5D01G107700.1	97	1	1209	2.5e-37	TraesCS5D01G107700	chr5D	121081723	121083206	Retrovirus-related Pol polyprotein from transposon TNT 1-94
	TRINITY_DN24359_c0_g1	13.8772	2.46e-15	1.23e-13	UP	NA	NA	NA	NA	NA	NA	NA	NA	NA	NA	NA
	TRINITY_DN597_c0_g1	10.831	2.57e-15	1.29e-13	UP	NA	NA	NA	NA	NA	NA	NA	NA	NA	NA	NA
	TRINITY_DN24966_c0_g1	11.9907	2.59e-15	1.3e-13	UP	TRINITY_DN24966_c0_g1	TraesCS7B01G337300.1	1037	841	1074	5.15e-95	TraesCS7B01G337300	chr7B	592344645	592345938	Desiccation-related protein PCC13-62, putative, expressed
	TRINITY_DN17123_c0_g1	7.42051	2.59e-15	1.3e-13	UP	TRINITY_DN17123_c0_g1	TraesCS1B01G369400.1	555	624	783	1.49e-28	TraesCS1B01G369400	chr1B	599569931	599572107	Acid phosphatase/vanadium-dependent haloperoxidase-related protein
	TRINITY_DN39880_c0_g1	10.2591	2.6e-15	1.3e-13	UP	NA	NA	NA	NA	NA	NA	NA	NA	NA	NA	NA
	TRINITY_DN13346_c0_g1	10.1608	2.61e-15	1.31e-13	UP	TRINITY_DN13346_c0_g1	TraesCS5A01G003200.1	1015	1272	1272	2.72e-130	TraesCS5A01G003200	chr5A	2409293	2412483	Core-2/I-branching beta-1,6-N-acetylglucosaminyltransferase family protein
	TRINITY_DN12639_c0_g1	6.01982	2.63e-15	1.31e-13	UP	TRINITY_DN12639_c0_g1	TraesCS2A01G487700.1	7	753	753	0	TraesCS2A01G487700	chr2A	722320072	722321195	DNA-directed RNA polymerase subunit beta'
	TRINITY_DN9768_c0_g1	10.3453	2.65e-15	1.32e-13	UP	NA	NA	NA	NA	NA	NA	NA	NA	NA	NA	NA
	TRINITY_DN28821_c1_g1	12.9432	2.75e-15	1.37e-13	UP	TRINITY_DN28821_c1_g1	TraesCS7A01G188300.1	1337	1473	2055	1.5e-66	TraesCS7A01G188300	chr7A	144603264	144605405	ATP-dependent zinc metalloprotease FTSH protein
	TRINITY_DN39878_c0_g1	9.93134	2.8e-15	1.4e-13	UP	NA	NA	NA	NA	NA	NA	NA	NA	NA	NA	NA
	TRINITY_DN28183_c0_g1	4.15239	2.84e-15	1.41e-13	UP	TRINITY_DN28183_c0_g1	TraesCS3D01G073000.1	565	632	762	2.56e-28	TraesCS3D01G073000	chr3D	33159459	33162518	Triosephosphate isomerase
	TRINITY_DN73437_c2_g1	11.2863	2.89e-15	1.44e-13	UP	NA	NA	NA	NA	NA	NA	NA	NA	NA	NA	NA
	TRINITY_DN6499_c0_g1	10.2997	2.91e-15	1.45e-13	UP	TRINITY_DN6499_c0_g1	TraesCS7D01G540700.3	23	60	1452	2.37e-11	TraesCS7D01G540700	chr7D	630527242	630530005	MYB-related protein
	TRINITY_DN8792_c0_g1	3.7449	2.92e-15	1.45e-13	UP	NA	NA	NA	NA	NA	NA	NA	NA	NA	NA	NA
	TRINITY_DN8972_c0_g2	12.8824	2.94e-15	1.46e-13	UP	NA	NA	NA	NA	NA	NA	NA	NA	NA	NA	NA
	TRINITY_DN69567_c0_g1	9.85312	2.99e-15	1.48e-13	UP	NA	NA	NA	NA	NA	NA	NA	NA	NA	NA	NA
	TRINITY_DN1201_c2_g1	9.98096	3e-15	1.49e-13	UP	NA	NA	NA	NA	NA	NA	NA	NA	NA	NA	NA
	TRINITY_DN8138_c0_g2	12.4604	3.05e-15	1.51e-13	UP	NA	NA	NA	NA	NA	NA	NA	NA	NA	NA	NA
	TRINITY_DN21299_c0_g1	3.92166	3.11e-15	1.54e-13	UP	TRINITY_DN21299_c0_g1	TraesCS4B01G106300.1	176	218	1140	2.5e-14	TraesCS4B01G106300	chr4B	115556448	115559956	Alcohol dehydrogenase
	TRINITY_DN5643_c0_g2	6.76026	3.13e-15	1.55e-13	UP	TRINITY_DN5643_c0_g2	TraesCS6B01G374100.1	372	27	537	1.57e-166	TraesCS6B01G374100	chr6B	646946222	646946873	Heat-shock protein, putative
	TRINITY_DN123152_c0_g2	5.83449	3.23e-15	1.6e-13	UP	TRINITY_DN123152_c0_g2	TraesCS3A01G073300.1	383	458	762	1.17e-30	TraesCS3A01G073300	chr3A	45570000	45573025	Triosephosphate isomerase
	TRINITY_DN21614_c0_g1	11.1368	3.24e-15	1.6e-13	UP	NA	NA	NA	NA	NA	NA	NA	NA	NA	NA	NA
	TRINITY_DN15522_c2_g1	10.1873	3.28e-15	1.62e-13	UP	NA	NA	NA	NA	NA	NA	NA	NA	NA	NA	NA
	TRINITY_DN20367_c0_g1	9.8429	3.32e-15	1.63e-13	UP	TRINITY_DN20367_c0_g1	TraesCS3A01G179100.1	395	303	417	4.01e-21	TraesCS3A01G179100	chr3A	205689861	205690277	HECT ubiquitin protein ligase family protein KAK
	TRINITY_DN28871_c0_g1	11.5591	3.42e-15	1.68e-13	UP	TRINITY_DN28871_c0_g1	TraesCS4B01G055400.1	957	1252	1383	6.32e-155	TraesCS4B01G055400	chr4B	43791637	43793019	Anthocyanin 5-aromatic acyltransferase
	TRINITY_DN113048_c2_g1	9.93885	3.44e-15	1.69e-13	UP	TRINITY_DN113048_c2_g1	TraesCS1B01G029700.1	2621	2684	2691	1.26e-15	TraesCS1B01G029700	chr1B	14609435	14626525	TIR-NBS-LRR class disease resistance protein
	TRINITY_DN79102_c0_g2	10.8331	3.46e-15	1.7e-13	UP	NA	NA	NA	NA	NA	NA	NA	NA	NA	NA	NA
	TRINITY_DN1802_c0_g1	8.77616	3.51e-15	1.72e-13	UP	TRINITY_DN1802_c0_g1	TraesCS2D01G468200.1	594	1450	1734	0	TraesCS2D01G468200	chr2D	572952347	572954307	Polyphenol oxidase
	TRINITY_DN1808_c1_g1	3.44975	3.52e-15	1.73e-13	UP	TRINITY_DN1808_c1_g1	TraesCSU01G074600.1	1	417	417	0	TraesCSU01G074600	chrUn	67041511	67041927	DUF538 family protein (Protein of unknown function, DUF538)
	TRINITY_DN14887_c0_g4	10.0984	3.53e-15	1.73e-13	UP	TRINITY_DN14887_c0_g4	TraesCSU01G130000.2	738	798	1143	2.95e-24	TraesCSU01G130000	chrUn	110522968	110526146	Man1-Src1p-carboxy-terminal domain protein
	TRINITY_DN22284_c0_g3	4.97304	3.56e-15	1.74e-13	UP	TRINITY_DN22284_c0_g3	TraesCS2B01G404400.1	863	514	1731	7.46e-170	TraesCS2B01G404400	chr2B	572554778	572557919	Hsp70-Hsp90 organizing protein 1
	TRINITY_DN67772_c0_g3	4.68892	3.57e-15	1.75e-13	UP	TRINITY_DN67772_c0_g3	TraesCS5B01G324300.1	241	1	468	2.69e-108	TraesCS5B01G324300	chr5B	508608609	508609076	mRNA cleavage and polyadenylation factor CLP1
	TRINITY_DN15670_c0_g1	4.72222	3.61e-15	1.76e-13	UP	NA	NA	NA	NA	NA	NA	NA	NA	NA	NA	NA
	TRINITY_DN70465_c2_g1	9.83615	3.63e-15	1.77e-13	UP	NA	NA	NA	NA	NA	NA	NA	NA	NA	NA	NA
	TRINITY_DN115436_c1_g1	5.3374	3.71e-15	1.81e-13	UP	TRINITY_DN115436_c1_g1	TraesCS2B01G401300.1	1936	1686	2760	5.46e-130	TraesCS2B01G401300	chr2B	569523119	569526752	CC-NBS-LRR family disease resistance protein
	TRINITY_DN8526_c0_g2	3.94082	3.79e-15	1.84e-13	UP	NA	NA	NA	NA	NA	NA	NA	NA	NA	NA	NA
	TRINITY_DN72644_c0_g1	9.91555	3.82e-15	1.86e-13	UP	TRINITY_DN72644_c0_g1	TraesCS7D01G241100.1	142	549	2103	6.56e-134	TraesCS7D01G241100	chr7D	205542410	205546351	Heat shock protein 90
	TRINITY_DN11612_c2_g1	12.6544	3.83e-15	1.87e-13	UP	NA	NA	NA	NA	NA	NA	NA	NA	NA	NA	NA
	TRINITY_DN50073_c0_g1	10.2516	3.83e-15	1.87e-13	UP	NA	NA	NA	NA	NA	NA	NA	NA	NA	NA	NA
	TRINITY_DN36553_c0_g1	5.84964	3.84e-15	1.87e-13	UP	TRINITY_DN36553_c0_g1	TraesCS1D01G401500.1	1	267	267	9.14e-137	TraesCS1D01G401500	chr1D	467494685	467494951	Clavata3/ESR (CLE) gene family member
	TRINITY_DN48026_c0_g1	9.87012	4.07e-15	1.98e-13	UP	TRINITY_DN48026_c0_g1	TraesCS3A01G260000.1	276	334	768	2.39e-23	TraesCS3A01G260000	chr3A	482403327	482406664	Arginine/serine-rich splicing factor, putative
	TRINITY_DN10948_c1_g4	6.2268	4.1e-15	1.99e-13	UP	NA	NA	NA	NA	NA	NA	NA	NA	NA	NA	NA
	TRINITY_DN28056_c3_g1	10.3034	4.16e-15	2.02e-13	UP	TRINITY_DN28056_c3_g1	TraesCS5A01G091100.1	8	312	426	6.84e-140	TraesCS5A01G091100	chr5A	125228227	125228652	Retrovirus-related Pol polyprotein from transposon TNT 1-94
	TRINITY_DN1767_c0_g1	4.98843	4.19e-15	2.03e-13	UP	TRINITY_DN1767_c0_g1	TraesCS6B01G174500.1	932	2976	2976	0	TraesCS6B01G174500	chr6B	189124934	189131078	ATP-dependent chaperone ClpB
	TRINITY_DN17093_c0_g1	3.89463	4.23e-15	2.05e-13	UP	NA	NA	NA	NA	NA	NA	NA	NA	NA	NA	NA
	TRINITY_DN4049_c0_g1	4.02995	4.23e-15	2.05e-13	UP	TRINITY_DN4049_c0_g1	TraesCS1A01G120100.3	1463	1600	2298	8.94e-64	TraesCS1A01G120100	chr1A	132481070	132485645	70 kDa heat shock protein
	TRINITY_DN17635_c0_g1	4.2829	4.26e-15	2.06e-13	UP	TRINITY_DN17635_c0_g1	TraesCS2B01G087400.1	501	609	894	5.12e-51	TraesCS2B01G087400	chr2B	49382830	49384467	Peroxidase family protein
	TRINITY_DN39639_c0_g1	7.23345	4.26e-15	2.06e-13	UP	TRINITY_DN39639_c0_g1	TraesCS3A01G009200.1	1	902	3081	0	TraesCS3A01G009200	chr3A	8321632	8329985	NBS-LRR-like resistance protein
	TRINITY_DN5409_c0_g2	10.3487	4.33e-15	2.09e-13	UP	TRINITY_DN5409_c0_g2	TraesCS6B01G362200.1	1	325	930	2.52e-169	TraesCS6B01G362200	chr6B	633896583	633898132	Superoxide dismutase [Cu-Zn]
	TRINITY_DN9870_c0_g1	13.9669	4.37e-15	2.11e-13	UP	NA	NA	NA	NA	NA	NA	NA	NA	NA	NA	NA
	TRINITY_DN45261_c0_g6	7.08804	4.41e-15	2.13e-13	UP	TRINITY_DN45261_c0_g6	TraesCS1B01G121600.1	365	446	1935	6.45e-32	TraesCS1B01G121600	chr1B	144926426	144931878	Glucan 1,3-beta-glucosidase
	TRINITY_DN1923_c0_g1	3.30628	4.42e-15	2.13e-13	UP	TRINITY_DN1923_c0_g1	TraesCS2D01G502700.2	1	489	489	0	TraesCS2D01G502700	chr2D	596252301	596254507	Universal stress family protein
	TRINITY_DN1632_c0_g2	4.89366	4.66e-15	2.24e-13	UP	TRINITY_DN1632_c0_g2	TraesCS7D01G352400.1	1158	852	1158	1.2e-157	TraesCS7D01G352400	chr7D	454071067	454072493	Kelch repeat protein
	TRINITY_DN32706_c0_g1	10.3972	4.81e-15	2.31e-13	UP	NA	NA	NA	NA	NA	NA	NA	NA	NA	NA	NA
	TRINITY_DN17211_c0_g1	7.4537	4.82e-15	2.31e-13	UP	NA	NA	NA	NA	NA	NA	NA	NA	NA	NA	NA
	TRINITY_DN9441_c0_g1	9.7497	4.82e-15	2.31e-13	UP	TRINITY_DN9441_c0_g1	TraesCS2D01G182000.1	1	267	267	9.98e-137	TraesCS2D01G182000	chr2D	126899412	126899904	B12D protein
	TRINITY_DN17405_c0_g1	9.8157	4.89e-15	2.34e-13	UP	NA	NA	NA	NA	NA	NA	NA	NA	NA	NA	NA
	TRINITY_DN1671_c5_g1	9.82996	4.91e-15	2.35e-13	UP	NA	NA	NA	NA	NA	NA	NA	NA	NA	NA	NA
	TRINITY_DN123199_c0_g1	11.209	5.08e-15	2.43e-13	UP	TRINITY_DN123199_c0_g1	TraesCS5D01G031600.1	313	384	888	1.52e-30	TraesCS5D01G031600	chr5D	28938583	28940781	2-aminoethanethiol dioxygenase
	TRINITY_DN24356_c0_g1	9.83556	5.14e-15	2.46e-13	UP	TRINITY_DN24356_c0_g1	TraesCS7D01G416500.1	584	890	1407	5.05e-161	TraesCS7D01G416500	chr7D	535550731	535553145	FBD-associated F-box protein
	TRINITY_DN24923_c0_g1	8.3768	5.16e-15	2.46e-13	UP	NA	NA	NA	NA	NA	NA	NA	NA	NA	NA	NA
	TRINITY_DN40411_c0_g1	9.9315	5.16e-15	2.47e-13	UP	TRINITY_DN40411_c0_g1	TraesCS7B01G309300.2	1030	1085	1146	6.55e-20	TraesCS7B01G309300	chr7B	553623812	553626351	WAT1-related protein
	TRINITY_DN22868_c0_g3	9.8801	5.23e-15	2.5e-13	UP	TRINITY_DN22868_c0_g3	TraesCS3D01G007600.1	3347	3090	4071	3.41e-122	TraesCS3D01G007600	chr3D	2619817	2627172	Paired amphipathic helix protein Sin3
	TRINITY_DN71588_c1_g1	3.67192	5.25e-15	2.5e-13	UP	TRINITY_DN71588_c1_g1	TraesCS5A01G251000.1	444	594	2346	5.55e-71	TraesCS5A01G251000	chr5A	466613864	466618092	Chaperone protein htpG family protein
	TRINITY_DN39351_c1_g1	5.18885	5.25e-15	2.5e-13	UP	TRINITY_DN39351_c1_g1	TraesCS4D01G119400.1	1486	1578	1878	3.44e-42	TraesCS4D01G119400	chr4D	100571621	100575457	Vacuolar sorting receptor family protein
	TRINITY_DN29258_c3_g1	7.75254	5.43e-15	2.58e-13	UP	NA	NA	NA	NA	NA	NA	NA	NA	NA	NA	NA
	TRINITY_DN29349_c0_g2	9.9503	5.44e-15	2.59e-13	UP	TRINITY_DN29349_c0_g2	TraesCS7D01G545800.1	3645	3954	3954	2.76e-162	TraesCS7D01G545800	chr7D	632801275	632820118	receptor kinase 1
	TRINITY_DN1669_c1_g1	9.80583	5.55e-15	2.64e-13	UP	TRINITY_DN1669_c1_g1	TraesCS6A01G403800.1	7	203	1221	6.07e-79	TraesCS6A01G403800	chr6A	610929180	610930400	Divinyl reductase
	TRINITY_DN67940_c0_g1	10.25	5.6e-15	2.66e-13	UP	NA	NA	NA	NA	NA	NA	NA	NA	NA	NA	NA
	TRINITY_DN10014_c1_g1	3.91943	5.67e-15	2.69e-13	UP	TRINITY_DN10014_c1_g1	TraesCS1B01G294300.1	427	669	1947	1.5e-115	TraesCS1B01G294300	chr1B	512172902	512175830	70 kDa heat shock protein
	TRINITY_DN58791_c0_g2	11.3947	5.69e-15	2.7e-13	UP	TRINITY_DN58791_c0_g2	TraesCS7B01G064000.1	48	102	639	3.99e-21	TraesCS7B01G064000	chr7B	69763149	69764237	Chaperone protein dnaJ
	TRINITY_DN4200_c0_g1	3.53866	5.91e-15	2.8e-13	UP	TRINITY_DN4200_c0_g1	TraesCS7D01G413500.1	1	359	588	0	TraesCS7D01G413500	chr7D	531827089	531828040	6,7-dimethyl-8-ribityllumazine synthase
	TRINITY_DN10509_c1_g2	9.79858	5.94e-15	2.81e-13	UP	TRINITY_DN10509_c1_g2	TraesCS6A01G078200.1	162	222	882	1.23e-20	TraesCS6A01G078200	chr6A	48103575	48106963	Protein kinase
	TRINITY_DN15655_c0_g1	11.8773	6e-15	2.84e-13	UP	NA	NA	NA	NA	NA	NA	NA	NA	NA	NA	NA
	TRINITY_DN121911_c1_g1	9.81868	6.13e-15	2.89e-13	UP	TRINITY_DN121911_c1_g1	TraesCS7D01G136700.1	2200	1967	2238	1.42e-120	TraesCS7D01G136700	chr7D	87995875	87999118	Protein kinase family protein
	TRINITY_DN50105_c0_g2	9.81868	6.13e-15	2.89e-13	UP	NA	NA	NA	NA	NA	NA	NA	NA	NA	NA	NA
	TRINITY_DN48965_c0_g1	9.97268	6.18e-15	2.91e-13	UP	TRINITY_DN48965_c0_g1	TraesCS6A01G176500.1	883	995	1176	3.44e-53	TraesCS6A01G176500	chr6A	194745761	194747829	Sentrin-specific protease
	TRINITY_DN20986_c0_g1	10.2012	6.28e-15	2.96e-13	UP	NA	NA	NA	NA	NA	NA	NA	NA	NA	NA	NA
	TRINITY_DN31179_c0_g1	9.79527	6.29e-15	2.96e-13	UP	NA	NA	NA	NA	NA	NA	NA	NA	NA	NA	NA
	TRINITY_DN7861_c0_g2	7.13192	6.35e-15	2.99e-13	UP	TRINITY_DN7861_c0_g2	TraesCS4B01G299500.1	951	253	951	0	TraesCS4B01G299500	chr4B	585963224	585964442	Ethylene-responsive transcription factor
	TRINITY_DN43841_c0_g1	5.01343	6.41e-15	3.02e-13	UP	NA	NA	NA	NA	NA	NA	NA	NA	NA	NA	NA
	TRINITY_DN8203_c0_g1	5.83781	6.42e-15	3.02e-13	UP	NA	NA	NA	NA	NA	NA	NA	NA	NA	NA	NA
	TRINITY_DN15543_c4_g1	9.06708	6.73e-15	3.16e-13	UP	NA	NA	NA	NA	NA	NA	NA	NA	NA	NA	NA
	TRINITY_DN11419_c0_g4	9.79559	6.81e-15	3.2e-13	UP	TRINITY_DN11419_c0_g4	TraesCS4A01G346000.1	369	411	492	6.53e-09	TraesCS4A01G346000	chr4A	625128444	625129887	Proline synthase co-transcribed bacterial
	TRINITY_DN6803_c0_g2	9.80614	6.83e-15	3.21e-13	UP	NA	NA	NA	NA	NA	NA	NA	NA	NA	NA	NA
	TRINITY_DN19099_c0_g2	11.8757	6.84e-15	3.21e-13	UP	NA	NA	NA	NA	NA	NA	NA	NA	NA	NA	NA
	TRINITY_DN1687_c0_g1	3.75242	6.86e-15	3.21e-13	UP	TRINITY_DN1687_c0_g1	TraesCS1D01G402000.1	95	1596	1596	0	TraesCS1D01G402000	chr1D	467596233	467599384	Structural constituent of cell wall
	TRINITY_DN12694_c0_g1	6.99136	6.86e-15	3.21e-13	UP	TRINITY_DN12694_c0_g1	TraesCS3D01G210700.10	479	269	3636	1.59e-102	TraesCS3D01G210700	chr3D	279901493	279934562	WD40 repeat-like protein
	TRINITY_DN61507_c1_g1	10.6912	6.95e-15	3.25e-13	UP	NA	NA	NA	NA	NA	NA	NA	NA	NA	NA	NA
	TRINITY_DN53627_c0_g1	11.4084	7.09e-15	3.31e-13	UP	NA	NA	NA	NA	NA	NA	NA	NA	NA	NA	NA
	TRINITY_DN3420_c0_g1	3.50539	7.15e-15	3.34e-13	UP	TRINITY_DN3420_c0_g1	TraesCS7A01G389700.1	40	156	156	9.41e-32	TraesCS7A01G389700	chr7A	566021142	566021297	Phenylalanine--tRNA ligase beta subunit
	TRINITY_DN67574_c0_g1	11.2464	7.26e-15	3.39e-13	UP	TRINITY_DN67574_c0_g1	TraesCS7D01G293800.1	752	651	921	1.61e-35	TraesCS7D01G293800	chr7D	364630891	364632896	65-kDa microtubule-associated-like protein
	TRINITY_DN24259_c0_g2	3.67675	7.26e-15	3.39e-13	UP	TRINITY_DN24259_c0_g2	TraesCS1D01G284000.1	1	122	1845	4.28e-58	TraesCS1D01G284000	chr1D	382234639	382237640	70 kDa heat shock protein
	TRINITY_DN23234_c1_g1	9.92842	7.4e-15	3.45e-13	UP	TRINITY_DN23234_c1_g1	TraesCS7A01G432100.1	86	1	1203	2.57e-38	TraesCS7A01G432100	chr7A	625742878	625745930	Zinc finger protein
	TRINITY_DN105841_c0_g3	8.22735	7.46e-15	3.48e-13	UP	NA	NA	NA	NA	NA	NA	NA	NA	NA	NA	NA
	TRINITY_DN2152_c0_g2	4.47038	7.53e-15	3.5e-13	UP	TRINITY_DN2152_c0_g2	TraesCS1B01G121600.2	536	1899	1899	0	TraesCS1B01G121600	chr1B	144926426	144931878	Glucan 1,3-beta-glucosidase
	TRINITY_DN10697_c0_g2	9.78127	7.66e-15	3.56e-13	UP	NA	NA	NA	NA	NA	NA	NA	NA	NA	NA	NA
	TRINITY_DN75267_c0_g1	10.3596	7.72e-15	3.58e-13	UP	TRINITY_DN75267_c0_g1	TraesCSU01G129700.1	552	613	648	6.11e-25	TraesCSU01G129700	chrUn	110519994	110521093	Pterin-4-alpha-carbinolamine dehydratase, putative
	TRINITY_DN58055_c0_g2	10.0178	7.81e-15	3.62e-13	UP	NA	NA	NA	NA	NA	NA	NA	NA	NA	NA	NA
	TRINITY_DN15507_c0_g3	9.7816	7.84e-15	3.63e-13	UP	NA	NA	NA	NA	NA	NA	NA	NA	NA	NA	NA
	TRINITY_DN54308_c0_g1	10.3604	7.96e-15	3.68e-13	UP	NA	NA	NA	NA	NA	NA	NA	NA	NA	NA	NA
	TRINITY_DN108570_c0_g1	3.95187	8.05e-15	3.72e-13	UP	TRINITY_DN108570_c0_g1	TraesCS7D01G309500.1	908	968	1014	1.91e-24	TraesCS7D01G309500	chr7D	392821607	392824489	Glyceraldehyde-3-phosphate dehydrogenase
	TRINITY_DN30444_c0_g1	10.1925	8.06e-15	3.72e-13	UP	TRINITY_DN30444_c0_g1	TraesCS7D01G425000.1	1011	1200	1200	5.51e-96	TraesCS7D01G425000	chr7D	545391506	545399015	TOPLESS-related 2
	TRINITY_DN26937_c0_g1	9.80973	8.17e-15	3.77e-13	UP	TRINITY_DN26937_c0_g1	TraesCS5D01G299300.1	1912	2016	2019	8.33e-34	TraesCS5D01G299300	chr5D	396807128	396812091	Esterase/lipase/thioesterase family protein
	TRINITY_DN107398_c0_g1	10.3666	8.26e-15	3.81e-13	UP	NA	NA	NA	NA	NA	NA	NA	NA	NA	NA	NA
	TRINITY_DN39290_c0_g1	4.9676	8.3e-15	3.83e-13	UP	TRINITY_DN39290_c0_g1	TraesCS7D01G438700.1	976	1245	1581	3.51e-137	TraesCS7D01G438700	chr7D	557841210	557843669	Cytochrome P450
	TRINITY_DN21515_c0_g3	4.98724	8.42e-15	3.88e-13	UP	NA	NA	NA	NA	NA	NA	NA	NA	NA	NA	NA
	TRINITY_DN15217_c0_g1	11.0811	9.03e-15	4.15e-13	UP	NA	NA	NA	NA	NA	NA	NA	NA	NA	NA	NA
	TRINITY_DN56840_c0_g1	8.41441	9.15e-15	4.2e-13	UP	TRINITY_DN56840_c0_g1	TraesCS5A01G314700.1	1146	1189	1191	1.54e-14	TraesCS5A01G314700	chr5A	525078041	525079362	Heat shock transcription factor
	TRINITY_DN26523_c2_g1	9.76374	9.35e-15	4.29e-13	UP	TRINITY_DN26523_c2_g1	TraesCS5A01G003200.2	610	831	1278	6.29e-114	TraesCS5A01G003200	chr5A	2409293	2412483	Core-2/I-branching beta-1,6-N-acetylglucosaminyltransferase family protein
	TRINITY_DN7187_c0_g2	9.50659	9.39e-15	4.31e-13	UP	TRINITY_DN7187_c0_g2	TraesCS2A01G489800.1	1822	1722	2658	7.2e-44	TraesCS2A01G489800	chr2A	723539088	723542524	Leucine-rich repeat receptor-like protein kinase family protein
	TRINITY_DN37736_c0_g1	7.10294	9.4e-15	4.31e-13	UP	NA	NA	NA	NA	NA	NA	NA	NA	NA	NA	NA
	TRINITY_DN125736_c1_g1	9.76713	9.54e-15	4.36e-13	UP	NA	NA	NA	NA	NA	NA	NA	NA	NA	NA	NA
	TRINITY_DN289_c2_g1	8.65811	9.56e-15	4.37e-13	UP	NA	NA	NA	NA	NA	NA	NA	NA	NA	NA	NA
	TRINITY_DN18157_c0_g2	3.68206	9.57e-15	4.37e-13	UP	NA	NA	NA	NA	NA	NA	NA	NA	NA	NA	NA
	TRINITY_DN14493_c0_g1	9.45357	9.68e-15	4.42e-13	UP	NA	NA	NA	NA	NA	NA	NA	NA	NA	NA	NA
	TRINITY_DN8513_c0_g2	10.2751	9.96e-15	4.54e-13	UP	TRINITY_DN8513_c0_g2	TraesCS7B01G355200.1	896	606	966	1.96e-105	TraesCS7B01G355200	chr7B	614181350	614182419	Early nodulin-like protein
	TRINITY_DN26847_c0_g1	8.14008	9.97e-15	4.54e-13	UP	TRINITY_DN26847_c0_g1	TraesCS4B01G397600.1	70	99	2034	2.88e-06	TraesCS4B01G397600	chr4B	671739110	671743251	Chaperone DnaK
	TRINITY_DN8213_c0_g2	4.60262	1e-14	4.56e-13	UP	TRINITY_DN8213_c0_g2	TraesCS2D01G250300.1	1	597	597	0	TraesCS2D01G250300	chr2D	298837437	298838033	Cytidylate kinase
	TRINITY_DN13977_c0_g2	10.058	1e-14	4.56e-13	UP	TRINITY_DN13977_c0_g2	TraesCS7D01G477300.1	154	1	429	3.69e-76	TraesCS7D01G477300	chr7D	588432090	588432518	Histone H2B
	TRINITY_DN6332_c1_g4	4.69791	1e-14	4.57e-13	UP	TRINITY_DN6332_c1_g4	TraesCS2A01G531800.1	1	74	267	8.89e-31	TraesCS2A01G531800	chr2A	748558310	748558576	Wound-responsive family protein
	TRINITY_DN82288_c0_g1	9.77487	1e-14	4.57e-13	UP	TRINITY_DN82288_c0_g1	TraesCS5D01G138700.1	155	288	303	3.25e-36	TraesCS5D01G138700	chr5D	220754227	220755842	disease resistance protein (TIR-NBS-LRR class) family
	TRINITY_DN17108_c0_g3	8.45888	1.02e-14	4.64e-13	UP	NA	NA	NA	NA	NA	NA	NA	NA	NA	NA	NA
	TRINITY_DN17988_c0_g2	4.35316	1.03e-14	4.67e-13	UP	NA	NA	NA	NA	NA	NA	NA	NA	NA	NA	NA
	TRINITY_DN14359_c2_g1	10.1172	1.03e-14	4.68e-13	UP	TRINITY_DN14359_c2_g1	TraesCS7D01G484800.1	1031	1086	1086	1.21e-21	TraesCS7D01G484800	chr7D	595309908	595312126	Dihydroflavonol 4-reductase
	TRINITY_DN5333_c0_g1	8.12874	1.04e-14	4.7e-13	UP	NA	NA	NA	NA	NA	NA	NA	NA	NA	NA	NA
	TRINITY_DN29190_c0_g3	7.67298	1.04e-14	4.72e-13	UP	TRINITY_DN29190_c0_g3	TraesCS6A01G295000.1	384	227	492	4.57e-78	TraesCS6A01G295000	chr6A	528989430	528989999	NADH-ubiquinone reductase complex 1 MLRQ subunit
	TRINITY_DN27114_c0_g1	10.2615	1.05e-14	4.78e-13	UP	TRINITY_DN27114_c0_g1	TraesCS2A01G578000.1	1	176	666	1.28e-81	TraesCS2A01G578000	chr2A	771609449	771610545	Glutathione S-transferase
	TRINITY_DN2736_c1_g1	3.58195	1.09e-14	4.93e-13	UP	TRINITY_DN2736_c1_g1	TraesCS7B01G149200.1	127	757	2103	0	TraesCS7B01G149200	chr7B	196904882	196908870	Heat shock protein 90
	TRINITY_DN2466_c2_g2	9.8217	1.11e-14	5.03e-13	UP	NA	NA	NA	NA	NA	NA	NA	NA	NA	NA	NA
	TRINITY_DN62509_c0_g1	10.8025	1.12e-14	5.04e-13	UP	TRINITY_DN62509_c0_g1	TraesCS1D01G383100.1	9	68	552	6.96e-24	TraesCS1D01G383100	chr1D	457879101	457881061	1,2-dihydroxy-3-keto-5-methylthiopentene dioxygenase
	TRINITY_DN125773_c0_g2	9.87151	1.12e-14	5.06e-13	UP	TRINITY_DN125773_c0_g2	TraesCS1D01G179200.1	1539	1473	1539	8.75e-28	TraesCS1D01G179200	chr1D	254388633	254393904	NAD(P)H-quinone oxidoreductase subunit 2, chloroplastic
	TRINITY_DN117727_c0_g1	8.59132	1.12e-14	5.07e-13	UP	NA	NA	NA	NA	NA	NA	NA	NA	NA	NA	NA
	TRINITY_DN5582_c0_g1	4.47381	1.15e-14	5.2e-13	UP	TRINITY_DN5582_c0_g1	TraesCS2D01G527800.1	490	1326	1326	0	TraesCS2D01G527800	chr2D	615466581	615471485	Anthocyanin 5-aromatic acyltransferase
	TRINITY_DN32812_c0_g1	9.43259	1.16e-14	5.21e-13	UP	TRINITY_DN32812_c0_g1	TraesCSU01G099700.2	238	441	441	2.91e-87	TraesCSU01G099700	chrUn	88195052	88196458	High mobility group protein
	TRINITY_DN47401_c0_g1	5.87096	1.16e-14	5.23e-13	UP	TRINITY_DN47401_c0_g1	TraesCS5D01G071200.1	512	1059	1059	0	TraesCS5D01G071200	chr5D	69111136	69114750	Cinnamoyl-CoA reductase 4
	TRINITY_DN15700_c0_g1	8.30196	1.17e-14	5.25e-13	UP	NA	NA	NA	NA	NA	NA	NA	NA	NA	NA	NA
	TRINITY_DN30540_c0_g1	4.21152	1.17e-14	5.28e-13	UP	TRINITY_DN30540_c0_g1	TraesCS7A01G225600.1	482	535	969	1.91e-19	TraesCS7A01G225600	chr7A	195189761	195199604	Epoxide hydrolase 2
	TRINITY_DN23322_c0_g1	10.2715	1.17e-14	5.28e-13	UP	TRINITY_DN23322_c0_g1	TraesCS2B01G112600.1	172	391	999	8.05e-113	TraesCS2B01G112600	chr2B	75847392	75848390	MYB transcription factor
	TRINITY_DN25510_c0_g1	9.89099	1.18e-14	5.31e-13	UP	NA	NA	NA	NA	NA	NA	NA	NA	NA	NA	NA
	TRINITY_DN49059_c0_g1	9.89099	1.18e-14	5.31e-13	UP	NA	NA	NA	NA	NA	NA	NA	NA	NA	NA	NA
	TRINITY_DN17369_c0_g1	10.3431	1.18e-14	5.31e-13	UP	TRINITY_DN17369_c0_g1	TraesCS1B01G409300.1	1	176	582	1.21e-86	TraesCS1B01G409300	chr1B	636753327	636754505	Photosynthetic NDH subcomplex B 3
	TRINITY_DN21353_c0_g1	10.4193	1.18e-14	5.31e-13	UP	TRINITY_DN21353_c0_g1	TraesCS2A01G502200.1	362	418	495	6.1e-22	TraesCS2A01G502200	chr2A	729983738	729985530	Universal stress family protein
	TRINITY_DN77324_c0_g1	10.0787	1.22e-14	5.46e-13	UP	TRINITY_DN77324_c0_g1	TraesCS7D01G445200.1	178	429	747	1.53e-130	TraesCS7D01G445200	chr7D	566133146	566133970	TRAM, LAG1 and CLN8 (TLC) lipid-sensing domain containing protein
	TRINITY_DN69026_c0_g1	9.96278	1.23e-14	5.5e-13	UP	TRINITY_DN69026_c0_g1	TraesCS2D01G534100.1	1	231	288	3.95e-112	TraesCS2D01G534100	chr2D	618129328	618129615	Wound-responsive family protein
	TRINITY_DN66717_c0_g1	4.93496	1.26e-14	5.62e-13	UP	TRINITY_DN66717_c0_g1	TraesCS3A01G093100.1	3624	3742	5145	1.62e-42	TraesCS3A01G093100	chr3A	59508325	59521961	Protein RST1
	TRINITY_DN31608_c2_g1	9.74222	1.3e-14	5.82e-13	UP	TRINITY_DN31608_c2_g1	TraesCS5B01G454400.1	7	868	966	0	TraesCS5B01G454400	chr5B	627397370	627400463	HAT transposon superfamily, putative
	TRINITY_DN9021_c1_g1	9.12924	1.3e-14	5.82e-13	UP	TRINITY_DN9021_c1_g1	TraesCS4A01G163000.1	1331	1220	3354	2.38e-51	TraesCS4A01G163000	chr4A	362065937	362113687	Ubiquitin carboxyl-terminal hydrolase family protein, expressed
	TRINITY_DN18246_c0_g3	8.68854	1.31e-14	5.83e-13	UP	NA	NA	NA	NA	NA	NA	NA	NA	NA	NA	NA
	TRINITY_DN20934_c0_g1	10.4061	1.33e-14	5.95e-13	UP	NA	NA	NA	NA	NA	NA	NA	NA	NA	NA	NA
	TRINITY_DN35953_c0_g6	6.20851	1.33e-14	5.95e-13	UP	TRINITY_DN35953_c0_g6	TraesCS4B01G216600.1	1556	1621	3561	9.34e-27	TraesCS4B01G216600	chr4B	456382345	456396153	Replication factor C large subunit
	TRINITY_DN67772_c0_g2	9.83508	1.35e-14	6e-13	UP	NA	NA	NA	NA	NA	NA	NA	NA	NA	NA	NA
	TRINITY_DN16280_c0_g1	3.64855	1.41e-14	6.26e-13	UP	TRINITY_DN16280_c0_g1	TraesCS7D01G440200.1	548	776	885	2.99e-102	TraesCS7D01G440200	chr7D	560248214	560250603	Phosphosulfolactate synthase-related protein
	TRINITY_DN70640_c0_g1	11.0798	1.43e-14	6.36e-13	UP	NA	NA	NA	NA	NA	NA	NA	NA	NA	NA	NA
	TRINITY_DN81124_c0_g3	11.3352	1.44e-14	6.4e-13	UP	NA	NA	NA	NA	NA	NA	NA	NA	NA	NA	NA
	TRINITY_DN41823_c0_g1	9.87472	1.46e-14	6.47e-13	UP	TRINITY_DN41823_c0_g1	TraesCS3A01G092800.1	1	106	2349	1.75e-49	TraesCS3A01G092800	chr3A	58836258	58839097	Raffinose synthase family protein
	TRINITY_DN18104_c0_g2	5.24692	1.47e-14	6.51e-13	UP	TRINITY_DN18104_c0_g2	TraesCS4B01G306700.1	80	1065	1065	0	TraesCS4B01G306700	chr4B	596282280	596283575	ATP phosphoribosyltransferase
	TRINITY_DN33030_c0_g1	9.91585	1.48e-14	6.54e-13	UP	TRINITY_DN33030_c0_g1	TraesCS3D01G126300.1	801	1051	1491	1.18e-126	TraesCS3D01G126300	chr3D	84499373	84501180	Glycosyltransferase
	TRINITY_DN17777_c0_g1	4.75594	1.52e-14	6.73e-13	UP	TRINITY_DN17777_c0_g1	TraesCS5A01G072700.1	90	202	1854	1.26e-51	TraesCS5A01G072700	chr5A	84115380	84120110	Pyrophosphate--fructose 6-phosphate 1-phosphotransferase subunit alpha
	TRINITY_DN75221_c0_g1	10.2577	1.54e-14	6.79e-13	UP	TRINITY_DN75221_c0_g1	TraesCS3D01G218900.1	1	107	663	7.14e-50	TraesCS3D01G218900	chr3D	298059819	298060729	Repellent protein 1
	TRINITY_DN74231_c1_g1	9.91336	1.62e-14	7.16e-13	UP	TRINITY_DN74231_c1_g1	TraesCS2A01G570700.1	1	29	1017	1.15e-06	TraesCS2A01G570700	chr2A	768086094	768087446	ATP synthase subunit alpha, chloroplastic
	TRINITY_DN13182_c0_g1	10.0112	1.68e-14	7.39e-13	UP	NA	NA	NA	NA	NA	NA	NA	NA	NA	NA	NA
	TRINITY_DN641_c0_g1	4.6746	1.68e-14	7.39e-13	UP	TRINITY_DN641_c0_g1	TraesCS2B01G087400.1	1	370	894	0	TraesCS2B01G087400	chr2B	49382830	49384467	Peroxidase family protein
	TRINITY_DN41264_c1_g1	10.5689	1.71e-14	7.52e-13	UP	NA	NA	NA	NA	NA	NA	NA	NA	NA	NA	NA
	TRINITY_DN4721_c0_g1	9.46118	1.72e-14	7.54e-13	UP	TRINITY_DN4721_c0_g1	TraesCS7B01G388700.1	1	239	3873	2.51e-123	TraesCS7B01G388700	chr7B	654949049	654953437	BAG family molecular chaperone regulator 6
	TRINITY_DN19919_c0_g1	4.02701	1.74e-14	7.66e-13	UP	NA	NA	NA	NA	NA	NA	NA	NA	NA	NA	NA
	TRINITY_DN82167_c0_g1	10.1508	1.75e-14	7.69e-13	UP	NA	NA	NA	NA	NA	NA	NA	NA	NA	NA	NA
	TRINITY_DN4793_c0_g1	10.7335	1.77e-14	7.75e-13	UP	TRINITY_DN4793_c0_g1	TraesCS7B01G460400.1	1947	2168	2400	6.32e-60	TraesCS7B01G460400	chr7B	717879399	717894869	receptor kinase 1
	TRINITY_DN15163_c0_g1	3.86503	1.77e-14	7.75e-13	UP	TRINITY_DN15163_c0_g1	TraesCS1B01G068200.1	471	503	552	1.4e-08	TraesCS1B01G068200	chr1B	53050349	53052389	Prostaglandin E synthase 3
	TRINITY_DN105777_c0_g1	7.92464	1.8e-14	7.88e-13	UP	NA	NA	NA	NA	NA	NA	NA	NA	NA	NA	NA
	TRINITY_DN98316_c0_g1	5.33181	1.81e-14	7.92e-13	UP	TRINITY_DN98316_c0_g1	TraesCS5B01G229600.1	1	274	954	3.35e-134	TraesCS5B01G229600	chr5B	406556940	406557893	Transmembrane protein 45B
	TRINITY_DN7661_c0_g2	10.09	1.81e-14	7.93e-13	UP	NA	NA	NA	NA	NA	NA	NA	NA	NA	NA	NA
	TRINITY_DN34533_c0_g1	7.90315	1.91e-14	8.35e-13	UP	NA	NA	NA	NA	NA	NA	NA	NA	NA	NA	NA
	TRINITY_DN22110_c0_g2	7.46667	1.95e-14	8.49e-13	UP	TRINITY_DN22110_c0_g2	TraesCS1B01G368400.1	196	875	909	0	TraesCS1B01G368400	chr1B	598843666	598844574	Acidic chitinase
	TRINITY_DN94705_c0_g2	9.71336	1.95e-14	8.51e-13	UP	TRINITY_DN94705_c0_g2	TraesCS2A01G109800.1	321	97	585	6.38e-114	TraesCS2A01G109800	chr2A	61488106	61488797	Ethylene-responsive transcription factor
	TRINITY_DN233839_c0_g1	10.6136	1.96e-14	8.52e-13	UP	NA	NA	NA	NA	NA	NA	NA	NA	NA	NA	NA
	TRINITY_DN35570_c0_g1	5.42396	1.96e-14	8.53e-13	UP	TRINITY_DN35570_c0_g1	TraesCS2B01G172900.1	1	36	660	2.97e-10	TraesCS2B01G172900	chr2B	146954784	146956562	Pyrrolidone-carboxylate peptidase
	TRINITY_DN46219_c1_g1	9.89989	1.98e-14	8.59e-13	UP	TRINITY_DN46219_c1_g1	TraesCS1A01G044900.1	1	264	732	2.73e-63	TraesCS1A01G044900	chr1A	25710162	25714282	Agamous MADS-box transcription factor
	TRINITY_DN35137_c1_g1	9.736	1.99e-14	8.63e-13	UP	TRINITY_DN35137_c1_g1	TraesCS7D01G131200.1	1704	1627	1704	9.21e-23	TraesCS7D01G131200	chr7D	83339642	83344929	Disease resistance protein (TIR-NBS-LRR class) family
	TRINITY_DN227_c2_g1	10.5922	1.99e-14	8.67e-13	UP	TRINITY_DN227_c2_g1	TraesCS4B01G059200.1	87	429	429	1.24e-175	TraesCS4B01G059200	chr4B	50403460	50404113	Phosphatidylinositol 4-phosphate 5-kinase 4
	TRINITY_DN224448_c0_g1	11.6743	2.02e-14	8.76e-13	UP	NA	NA	NA	NA	NA	NA	NA	NA	NA	NA	NA
	TRINITY_DN54854_c0_g1	7.77824	2.04e-14	8.84e-13	UP	TRINITY_DN54854_c0_g1	TraesCS7D01G108600.1	393	717	717	8.83e-171	TraesCS7D01G108600	chr7D	65399270	65399986	GDSL esterase/lipase
	TRINITY_DN183484_c0_g1	10.8638	2.08e-14	9.03e-13	UP	TRINITY_DN183484_c0_g1	TraesCS2B01G561700.1	238	299	300	1.44e-21	TraesCS2B01G561700	chr2B	754551187	754551486	Wound-responsive family protein
	TRINITY_DN18750_c0_g1	4.08756	2.09e-14	9.04e-13	UP	NA	NA	NA	NA	NA	NA	NA	NA	NA	NA	NA
	TRINITY_DN105416_c1_g1	3.64763	2.15e-14	9.32e-13	UP	TRINITY_DN105416_c1_g1	TraesCS7B01G149200.1	1205	1452	2103	1.17e-121	TraesCS7B01G149200	chr7B	196904882	196908870	Heat shock protein 90
	TRINITY_DN16250_c0_g3	9.72143	2.16e-14	9.33e-13	UP	NA	NA	NA	NA	NA	NA	NA	NA	NA	NA	NA
	TRINITY_DN22762_c0_g2	9.72143	2.16e-14	9.33e-13	UP	TRINITY_DN22762_c0_g2	TraesCS5D01G427700.1	126	336	336	1.19e-88	TraesCS5D01G427700	chr5D	485814823	485818665	High mobility group protein 1
	TRINITY_DN19538_c0_g1	4.35267	2.17e-14	9.4e-13	UP	TRINITY_DN19538_c0_g1	TraesCS3D01G227500.1	299	367	1098	1.32e-28	TraesCS3D01G227500	chr3D	309659568	309666194	SGT1
	TRINITY_DN40140_c0_g1	10.1005	2.19e-14	9.45e-13	UP	NA	NA	NA	NA	NA	NA	NA	NA	NA	NA	NA
	TRINITY_DN58649_c0_g1	3.93604	2.19e-14	9.46e-13	UP	NA	NA	NA	NA	NA	NA	NA	NA	NA	NA	NA
	TRINITY_DN49551_c0_g1	6.66516	2.25e-14	9.7e-13	UP	TRINITY_DN49551_c0_g1	TraesCS2B01G036200.1	1229	1719	1719	0	TraesCS2B01G036200	chr2B	17237518	17239422	Receptor kinase-like protein
	TRINITY_DN39912_c0_g1	10.2678	2.26e-14	9.74e-13	UP	TRINITY_DN39912_c0_g1	TraesCS7D01G521200.1	602	823	3321	7.41e-114	TraesCS7D01G521200	chr7D	618485933	618490101	Non-specific serine/threonine protein kinase
	TRINITY_DN104566_c0_g2	9.71408	2.26e-14	9.76e-13	UP	NA	NA	NA	NA	NA	NA	NA	NA	NA	NA	NA
	TRINITY_DN38930_c0_g2	9.82388	2.26e-14	9.76e-13	UP	TRINITY_DN38930_c0_g2	TraesCS7A01G023500.1	383	528	528	1.7e-71	TraesCS7A01G023500	chr7A	9335028	9335555	Disease resistance protein RPM1
	TRINITY_DN22707_c0_g2	9.70281	2.28e-14	9.81e-13	UP	NA	NA	NA	NA	NA	NA	NA	NA	NA	NA	NA
	TRINITY_DN28367_c0_g1	4.53251	2.29e-14	9.85e-13	UP	NA	NA	NA	NA	NA	NA	NA	NA	NA	NA	NA
	TRINITY_DN36538_c0_g7	5.31068	2.3e-14	9.87e-13	UP	NA	NA	NA	NA	NA	NA	NA	NA	NA	NA	NA
	TRINITY_DN243063_c0_g1	4.32685	2.3e-14	9.89e-13	UP	TRINITY_DN243063_c0_g1	TraesCS1D01G282200.1	1187	1245	1245	3.3e-23	TraesCS1D01G282200	chr1D	379586848	379591111	Tetratricopeptide repeat (TPR)-like superfamily protein
	TRINITY_DN1604_c1_g1	5.42574	2.3e-14	9.9e-13	UP	TRINITY_DN1604_c1_g1	TraesCS3D01G487500.1	1197	1098	1254	2.24e-24	TraesCS3D01G487500	chr3D	582832099	582833380	U3 small nucleolar RNA-associated protein 18-like protein
	TRINITY_DN15612_c0_g1	4.83866	2.32e-14	9.94e-13	UP	TRINITY_DN15612_c0_g1	TraesCS7B01G194200.1	1	601	1110	0	TraesCS7B01G194200	chr7B	333957975	333963387	Thioredoxin reductase
	TRINITY_DN21450_c0_g1	5.0854	2.33e-14	9.99e-13	UP	TRINITY_DN21450_c0_g1	TraesCS6D01G164700.1	319	925	930	1.07e-136	TraesCS6D01G164700	chr6D	143671813	143672913	Glutamate--cysteine ligase
	TRINITY_DN34612_c0_g4	5.52199	2.36e-14	1.01e-12	UP	TRINITY_DN34612_c0_g4	TraesCS7D01G087500.1	63	184	312	2.16e-56	TraesCS7D01G087500	chr7D	53524588	53525132	Early nodulin 93
	TRINITY_DN16248_c0_g1	5.14168	2.38e-14	1.02e-12	UP	NA	NA	NA	NA	NA	NA	NA	NA	NA	NA	NA
	TRINITY_DN11196_c0_g1	10.0023	2.38e-14	1.02e-12	UP	TRINITY_DN11196_c0_g1	TraesCS7A01G567500.1	5106	5235	5253	1.08e-50	TraesCS7A01G567500	chr7A	736088791	736096134	NBS-LRR disease resistance protein
	TRINITY_DN86131_c2_g1	8.32163	2.5e-14	1.07e-12	UP	TRINITY_DN86131_c2_g1	TraesCS3A01G203800.1	675	1	675	0	TraesCS3A01G203800	chr3A	353167954	353168628	Retrovirus-related Pol polyprotein from transposon TNT 1-94
	TRINITY_DN38236_c0_g1	9.69143	2.55e-14	1.09e-12	UP	NA	NA	NA	NA	NA	NA	NA	NA	NA	NA	NA
	TRINITY_DN47233_c0_g1	9.94479	2.55e-14	1.09e-12	UP	NA	NA	NA	NA	NA	NA	NA	NA	NA	NA	NA
	TRINITY_DN81145_c4_g1	10.1909	2.57e-14	1.1e-12	UP	NA	NA	NA	NA	NA	NA	NA	NA	NA	NA	NA
	TRINITY_DN20835_c0_g1	5.26309	2.59e-14	1.1e-12	UP	TRINITY_DN20835_c0_g1	TraesCS2D01G075200.1	963	1077	1077	3.76e-54	TraesCS2D01G075200	chr2D	32150904	32152082	L-lactate dehydrogenase
	TRINITY_DN13423_c1_g3	8.083	2.63e-14	1.12e-12	UP	TRINITY_DN13423_c1_g3	TraesCS5B01G230900.1	277	1	363	6.85e-119	TraesCS5B01G230900	chr5B	407621355	407621717	WD repeat domain phosphoinositide-interacting protein 2
	TRINITY_DN8481_c1_g1	4.06147	2.67e-14	1.13e-12	UP	TRINITY_DN8481_c1_g1	TraesCS1A01G285000.1	1058	1353	1845	1.43e-146	TraesCS1A01G285000	chr1A	482335991	482338978	70 kDa heat shock protein
	TRINITY_DN209743_c0_g1	11.9339	2.69e-14	1.14e-12	UP	NA	NA	NA	NA	NA	NA	NA	NA	NA	NA	NA
	TRINITY_DN3964_c0_g3	9.68035	2.87e-14	1.22e-12	UP	NA	NA	NA	NA	NA	NA	NA	NA	NA	NA	NA
	TRINITY_DN30326_c0_g2	4.9671	2.89e-14	1.22e-12	UP	TRINITY_DN30326_c0_g2	TraesCS2D01G261100.1	1	503	1569	0	TraesCS2D01G261100	chr2D	317940748	317942412	Cytochrome P450
	TRINITY_DN88091_c0_g1	5.43314	2.92e-14	1.23e-12	UP	TRINITY_DN88091_c0_g1	TraesCS3B01G484200.2	1075	1539	1539	0	TraesCS3B01G484200	chr3B	730756426	730760135	Beta-glucosidase, putative
	TRINITY_DN1192_c0_g2	11.1304	2.95e-14	1.25e-12	UP	NA	NA	NA	NA	NA	NA	NA	NA	NA	NA	NA
	TRINITY_DN33172_c1_g1	9.7975	2.95e-14	1.25e-12	UP	NA	NA	NA	NA	NA	NA	NA	NA	NA	NA	NA
	TRINITY_DN5661_c0_g2	3.76074	2.96e-14	1.25e-12	UP	TRINITY_DN5661_c0_g2	TraesCS2A01G246200.1	1342	1071	1626	5.93e-140	TraesCS2A01G246200	chr2A	360428730	360436928	Proline--tRNA ligase
	TRINITY_DN41146_c0_g4	12.4078	3.07e-14	1.3e-12	UP	NA	NA	NA	NA	NA	NA	NA	NA	NA	NA	NA
	TRINITY_DN7186_c0_g1	11.9418	3.07e-14	1.3e-12	UP	TRINITY_DN7186_c0_g1	TraesCS4B01G114400.1	63	1	1164	6.63e-11	TraesCS4B01G114400	chr4B	129524890	129526053	Anthranilate synthase alpha subunit 2, chloroplastic
	TRINITY_DN5087_c2_g1	9.72904	3.15e-14	1.33e-12	UP	TRINITY_DN5087_c2_g1	TraesCS7A01G008800.1	1	411	1011	1.34e-125	TraesCS7A01G008800	chr7A	3858938	3860198	NAC domain protein,
	TRINITY_DN79593_c0_g1	4.97115	3.15e-14	1.33e-12	UP	TRINITY_DN79593_c0_g1	TraesCS7B01G149000.1	1639	1719	1908	9.93e-35	TraesCS7B01G149000	chr7B	196656577	196660131	Ubiquitin-associated domain-containing family protein
	TRINITY_DN4400_c0_g1	5.4365	3.18e-14	1.34e-12	UP	NA	NA	NA	NA	NA	NA	NA	NA	NA	NA	NA
	TRINITY_DN61265_c3_g1	5.58141	3.25e-14	1.37e-12	UP	NA	NA	NA	NA	NA	NA	NA	NA	NA	NA	NA
	TRINITY_DN89410_c3_g1	10.2861	3.26e-14	1.37e-12	UP	NA	NA	NA	NA	NA	NA	NA	NA	NA	NA	NA
	TRINITY_DN5934_c2_g1	4.73597	3.34e-14	1.41e-12	UP	NA	NA	NA	NA	NA	NA	NA	NA	NA	NA	NA
	TRINITY_DN16292_c0_g1	4.23073	3.37e-14	1.41e-12	UP	TRINITY_DN16292_c0_g1	TraesCS5A01G482400.1	631	762	1146	1.89e-63	TraesCS5A01G482400	chr5A	654086402	654090003	Hsp70 nucleotide exchange factor fes1
	TRINITY_DN21728_c1_g1	11.3661	3.41e-14	1.43e-12	UP	TRINITY_DN21728_c1_g1	TraesCS1B01G336300.1	1462	1252	1911	3.6e-106	TraesCS1B01G336300	chr1B	563027354	563031698	Sulfite reductase [NADPH] hemoprotein beta-component
	TRINITY_DN51577_c0_g1	10.1499	3.47e-14	1.46e-12	UP	NA	NA	NA	NA	NA	NA	NA	NA	NA	NA	NA
	TRINITY_DN14949_c1_g1	9.66917	3.49e-14	1.47e-12	UP	NA	NA	NA	NA	NA	NA	NA	NA	NA	NA	NA
	TRINITY_DN2090_c0_g1	3.37328	3.54e-14	1.48e-12	UP	TRINITY_DN2090_c0_g1	TraesCS1A01G161900.1	254	429	429	2.26e-86	TraesCS1A01G161900	chr1A	290554514	290555958	Thioredoxin
	TRINITY_DN65749_c0_g3	9.676	3.59e-14	1.5e-12	UP	TRINITY_DN65749_c0_g3	TraesCS5D01G321100.1	703	836	1110	6.69e-55	TraesCS5D01G321100	chr5D	413066316	413068146	UDP-glucose 4-epimerase
	TRINITY_DN3859_c0_g2	9.73782	3.6e-14	1.51e-12	UP	TRINITY_DN3859_c0_g2	TraesCS2B01G002100.1	1	238	666	2.85e-68	TraesCS2B01G002100	chr2B	1348975	1361789	Inosine-5'-monophosphate dehydrogenase
	TRINITY_DN37726_c0_g1	3.88417	3.73e-14	1.56e-12	UP	TRINITY_DN37726_c0_g1	TraesCS7B01G168300.1	775	390	978	0	TraesCS7B01G168300	chr7B	235448977	235450208	Heat stress transcription factor
	TRINITY_DN62077_c0_g2	5.45794	3.76e-14	1.57e-12	UP	TRINITY_DN62077_c0_g2	TraesCS3B01G384800.1	846	642	1377	2.55e-104	TraesCS3B01G384800	chr3B	605014208	605017449	Carboxypeptidase
	TRINITY_DN27916_c0_g1	7.84663	3.81e-14	1.59e-12	UP	TRINITY_DN27916_c0_g1	TraesCS7D01G536900.1	780	933	933	4.14e-72	TraesCS7D01G536900	chr7D	628603672	628606656	2-oxoglutarate (2OG) and Fe(II)-dependent oxygenase superfamily protein
	TRINITY_DN19907_c0_g2	8.20566	3.81e-14	1.59e-12	UP	TRINITY_DN19907_c0_g2	TraesCS5B01G152400.1	606	1	606	0	TraesCS5B01G152400	chr5B	281644236	281644841	Calcium-binding protein
	TRINITY_DN55539_c0_g1	10.2539	3.84e-14	1.6e-12	UP	NA	NA	NA	NA	NA	NA	NA	NA	NA	NA	NA
	TRINITY_DN178863_c0_g1	10.0609	3.84e-14	1.6e-12	UP	TRINITY_DN178863_c0_g1	TraesCS7A01G174400.1	1	166	252	6.14e-79	TraesCS7A01G174400	chr7A	128392957	128394102	Disease resistance protein (TIR-NBS-LRR class) family
	TRINITY_DN19820_c1_g3	7.42962	3.95e-14	1.64e-12	UP	TRINITY_DN19820_c1_g3	TraesCS3B01G406100.1	1	294	465	1.21e-153	TraesCS3B01G406100	chr3B	641666585	641667049	Ferredoxin
	TRINITY_DN13364_c0_g2	9.77566	4.11e-14	1.71e-12	UP	NA	NA	NA	NA	NA	NA	NA	NA	NA	NA	NA
	TRINITY_DN4243_c0_g2	7.99119	4.12e-14	1.71e-12	UP	NA	NA	NA	NA	NA	NA	NA	NA	NA	NA	NA
	TRINITY_DN24401_c0_g1	7.61083	4.2e-14	1.74e-12	UP	TRINITY_DN24401_c0_g1	TraesCS1A01G130900.1	434	395	1659	1.85e-11	TraesCS1A01G130900	chr1A	171007151	171034407	muscle M-line assembly protein
	TRINITY_DN30108_c0_g1	11.0425	4.3e-14	1.78e-12	UP	NA	NA	NA	NA	NA	NA	NA	NA	NA	NA	NA
	TRINITY_DN18220_c0_g2	4.84553	4.3e-14	1.78e-12	UP	TRINITY_DN18220_c0_g2	TraesCS2D01G453400.1	1	157	279	1.35e-77	TraesCS2D01G453400	chr2D	562340782	562341642	senescence-associated family protein (DUF581)
	TRINITY_DN50464_c0_g2	6.55646	4.36e-14	1.8e-12	UP	NA	NA	NA	NA	NA	NA	NA	NA	NA	NA	NA
	TRINITY_DN44377_c0_g1	10.1766	4.36e-14	1.8e-12	UP	TRINITY_DN44377_c0_g1	TraesCSU01G106100.1	1	158	732	2.63e-78	TraesCSU01G106100	chrUn	93046829	93049602	Endo-1,31,4-beta-D-glucanase
	TRINITY_DN65275_c0_g1	9.70883	4.47e-14	1.85e-12	UP	TRINITY_DN65275_c0_g1	TraesCS7A01G264500.1	921	976	1275	2.37e-21	TraesCS7A01G264500	chr7A	263731159	263733027	Stress up-regulated Nod 19 protein
	TRINITY_DN72366_c0_g1	5.7151	4.48e-14	1.85e-12	UP	TRINITY_DN72366_c0_g1	TraesCS2B01G561900.1	1	145	300	5.29e-71	TraesCS2B01G561900	chr2B	754614311	754614610	Wound-responsive family protein
	TRINITY_DN9751_c0_g1	9.69605	4.5e-14	1.86e-12	UP	TRINITY_DN9751_c0_g1	TraesCS6B01G031500.1	1300	1778	2031	0	TraesCS6B01G031500	chr6B	18645695	18648598	Acid beta-fructofuranosidase
	TRINITY_DN23780_c0_g1	10.6461	4.68e-14	1.93e-12	UP	NA	NA	NA	NA	NA	NA	NA	NA	NA	NA	NA
	TRINITY_DN3361_c0_g1	3.39601	4.72e-14	1.95e-12	UP	NA	NA	NA	NA	NA	NA	NA	NA	NA	NA	NA
	TRINITY_DN18961_c0_g3	3.98069	4.73e-14	1.95e-12	UP	TRINITY_DN18961_c0_g3	TraesCS1B01G083600.1	231	1	231	9.53e-119	TraesCS1B01G083600	chr1B	67540483	67540950	Guanosine nucleotide diphosphate dissociation inhibitor
	TRINITY_DN368_c0_g1	6.54311	4.75e-14	1.96e-12	UP	TRINITY_DN368_c0_g1	TraesCS4D01G144500.1	962	1215	1266	1.59e-130	TraesCS4D01G144500	chr4D	132941998	132964184	Ankyrin repeat family protein
	TRINITY_DN30499_c2_g1	7.26803	4.76e-14	1.96e-12	UP	NA	NA	NA	NA	NA	NA	NA	NA	NA	NA	NA
	TRINITY_DN60417_c0_g2	10.1363	4.77e-14	1.96e-12	UP	TRINITY_DN60417_c0_g2	TraesCS7D01G366600.1	3081	2830	4554	3.42e-127	TraesCS7D01G366600	chr7D	474333460	474344369	ABC transporter family protein
	TRINITY_DN30556_c1_g3	4.89473	4.83e-14	1.99e-12	UP	TRINITY_DN30556_c1_g3	TraesCS3A01G000100.1	1	1421	2259	0	TraesCS3A01G000100	chr3A	14740	17826	Subtilisin-like protease
	TRINITY_DN107788_c2_g1	10.4898	4.9e-14	2.02e-12	UP	NA	NA	NA	NA	NA	NA	NA	NA	NA	NA	NA
	TRINITY_DN69239_c0_g1	7.60594	5.04e-14	2.07e-12	UP	TRINITY_DN69239_c0_g1	TraesCS3B01G233100.1	1577	1301	1797	2.38e-94	TraesCS3B01G233100	chr3B	360009741	360011537	RNA-directed DNA polymerase (Reverse transcriptase)
	TRINITY_DN14911_c2_g1	10.8165	5.04e-14	2.07e-12	UP	NA	NA	NA	NA	NA	NA	NA	NA	NA	NA	NA
	TRINITY_DN9174_c0_g1	3.35525	5.05e-14	2.07e-12	UP	NA	NA	NA	NA	NA	NA	NA	NA	NA	NA	NA
	TRINITY_DN2485_c0_g1	3.31941	5.06e-14	2.07e-12	UP	TRINITY_DN2485_c0_g1	TraesCS3D01G246600.1	119	411	411	5.94e-153	TraesCS3D01G246600	chr3D	345526696	345527727	Zinc finger A20 and AN1 domain stress-associated protein
	TRINITY_DN18117_c0_g1	9.91644	5.11e-14	2.1e-12	UP	NA	NA	NA	NA	NA	NA	NA	NA	NA	NA	NA
	TRINITY_DN16239_c0_g1	4.30736	5.16e-14	2.12e-12	UP	NA	NA	NA	NA	NA	NA	NA	NA	NA	NA	NA
	TRINITY_DN40191_c0_g1	10.0406	5.22e-14	2.14e-12	UP	TRINITY_DN40191_c0_g1	TraesCS7D01G414600.1	300	348	348	9.73e-18	TraesCS7D01G414600	chr7D	532898280	532898900	Macrophage migration inhibitory factor
	TRINITY_DN3192_c0_g1	3.30546	5.29e-14	2.17e-12	UP	TRINITY_DN3192_c0_g1	TraesCS5B01G236400.1	202	897	897	0	TraesCS5B01G236400	chr5B	417438436	417443406	Heat stress transcription factor
	TRINITY_DN24903_c0_g2	10.1976	5.4e-14	2.21e-12	UP	NA	NA	NA	NA	NA	NA	NA	NA	NA	NA	NA
	TRINITY_DN93622_c0_g1	10.3992	5.41e-14	2.22e-12	UP	NA	NA	NA	NA	NA	NA	NA	NA	NA	NA	NA
	TRINITY_DN14046_c0_g1	7.29914	5.49e-14	2.24e-12	UP	TRINITY_DN14046_c0_g1	TraesCS6A01G284000.1	2	279	306	3.07e-91	TraesCS6A01G284000	chr6A	515062858	515063163	GAMMA-TUBULIN COMPLEX PROTEIN 4
	TRINITY_DN2013_c0_g1	3.85009	5.7e-14	2.32e-12	UP	TRINITY_DN2013_c0_g1	TraesCS7A01G264400.1	1626	1890	1890	2.98e-137	TraesCS7A01G264400	chr7A	263714673	263727769	Receptor protein kinase, putative
	TRINITY_DN22592_c0_g2	6.3397	5.76e-14	2.34e-12	UP	NA	NA	NA	NA	NA	NA	NA	NA	NA	NA	NA
	TRINITY_DN5472_c1_g1	5.87648	5.83e-14	2.37e-12	UP	TRINITY_DN5472_c1_g1	TraesCS7B01G260300.1	355	519	564	2.87e-52	TraesCS7B01G260300	chr7B	480429258	480434326	Nucleobase ascorbate transporter
	TRINITY_DN71345_c1_g1	12.8515	5.89e-14	2.4e-12	UP	NA	NA	NA	NA	NA	NA	NA	NA	NA	NA	NA
	TRINITY_DN55821_c0_g1	10.0529	6.06e-14	2.46e-12	UP	TRINITY_DN55821_c0_g1	TraesCS6A01G380400.1	351	260	369	3.55e-28	TraesCS6A01G380400	chr6A	600745082	600745537	DEAD/DEAH box RNA helicase family protein
	TRINITY_DN31529_c3_g1	10.1536	6.07e-14	2.46e-12	UP	NA	NA	NA	NA	NA	NA	NA	NA	NA	NA	NA
	TRINITY_DN19384_c0_g1	10.6671	6.13e-14	2.49e-12	UP	NA	NA	NA	NA	NA	NA	NA	NA	NA	NA	NA
	TRINITY_DN6525_c0_g2	8.58638	6.14e-14	2.49e-12	UP	TRINITY_DN6525_c0_g2	TraesCS3D01G101600.1	2243	2120	2244	1.27e-35	TraesCS3D01G101600	chr3D	54629018	54631361	Leucine-rich repeat receptor-like protein kinase family protein
	TRINITY_DN2831_c0_g2	9.61906	6.16e-14	2.5e-12	UP	NA	NA	NA	NA	NA	NA	NA	NA	NA	NA	NA
	TRINITY_DN48183_c0_g4	2.96227	6.2e-14	2.51e-12	UP	TRINITY_DN48183_c0_g4	TraesCS5D01G275300.1	891	939	939	1.2e-17	TraesCS5D01G275300	chr5D	378120422	378121360	Splicing factor U2af small subunit A
	TRINITY_DN259318_c0_g1	10.1686	6.32e-14	2.56e-12	UP	NA	NA	NA	NA	NA	NA	NA	NA	NA	NA	NA
	TRINITY_DN16363_c0_g1	9.95049	6.32e-14	2.56e-12	UP	TRINITY_DN16363_c0_g1	TraesCS7D01G353400.1	1314	2214	2214	0	TraesCS7D01G353400	chr7D	457128413	457132502	E3 ubiquitin-protein ligase SINA-like 10
	TRINITY_DN79246_c0_g1	3.82612	6.41e-14	2.59e-12	UP	TRINITY_DN79246_c0_g1	TraesCS1A01G384800.1	4	163	294	1.01e-52	TraesCS1A01G384800	chr1A	554463530	554464465	light-independent protochlorophyllide reductase subunit
	TRINITY_DN102752_c0_g1	4.46319	6.47e-14	2.61e-12	UP	NA	NA	NA	NA	NA	NA	NA	NA	NA	NA	NA
	TRINITY_DN80524_c2_g1	9.71593	6.59e-14	2.66e-12	UP	TRINITY_DN80524_c2_g1	TraesCS1A01G416600.1	218	114	270	8.19e-49	TraesCS1A01G416600	chr1A	574934591	574935614	Transcription elongation factor 1
	TRINITY_DN88743_c0_g1	7.5911	6.61e-14	2.67e-12	UP	NA	NA	NA	NA	NA	NA	NA	NA	NA	NA	NA
	TRINITY_DN3156_c1_g2	10.1739	6.67e-14	2.69e-12	UP	TRINITY_DN3156_c1_g2	TraesCS6D01G004600.2	546	695	1017	1.24e-51	TraesCS6D01G004600	chr6D	2169671	2171595	Protein disulfide-isomerase
	TRINITY_DN18745_c0_g1	9.61116	6.82e-14	2.75e-12	UP	TRINITY_DN18745_c0_g1	TraesCS6D01G381800.1	1	93	1506	6.57e-42	TraesCS6D01G381800	chr6D	462024821	462027738	F-box family protein
	TRINITY_DN17302_c0_g1	5.0308	6.83e-14	2.75e-12	UP	NA	NA	NA	NA	NA	NA	NA	NA	NA	NA	NA
	TRINITY_DN30471_c1_g1	4.4111	6.88e-14	2.77e-12	UP	TRINITY_DN30471_c1_g1	TraesCS1B01G139500.1	2412	2499	2499	2.43e-34	TraesCS1B01G139500	chr1B	183478959	183484632	70 kDa heat shock protein
	TRINITY_DN16502_c0_g1	3.79148	6.9e-14	2.77e-12	UP	TRINITY_DN16502_c0_g1	TraesCS4A01G091300.1	1	37	939	2.57e-09	TraesCS4A01G091300	chr4A	97874357	97875989	RNA-binding family protein
	TRINITY_DN20683_c0_g4	9.81387	6.95e-14	2.79e-12	UP	TRINITY_DN20683_c0_g4	TraesCS7D01G472200.1	326	228	1020	4.75e-25	TraesCS7D01G472200	chr7D	585546442	585551715	WAT1-related protein
	TRINITY_DN10366_c0_g3	3.73746	7.06e-14	2.84e-12	UP	TRINITY_DN10366_c0_g3	TraesCS7A01G270100.1	1	317	1125	1.59e-159	TraesCS7A01G270100	chr7A	276184867	276186319	Heat shock transcription factor
	TRINITY_DN21868_c0_g1	6.28476	7.07e-14	2.84e-12	UP	NA	NA	NA	NA	NA	NA	NA	NA	NA	NA	NA
	TRINITY_DN12125_c1_g1	7.21946	7.27e-14	2.92e-12	UP	TRINITY_DN12125_c1_g1	TraesCS6B01G222500.1	60	171	456	2.22e-33	TraesCS6B01G222500	chr6B	321297148	321297603	Retrovirus-related Pol polyprotein from transposon TNT 1-94
	TRINITY_DN64602_c0_g1	11.3929	7.29e-14	2.92e-12	UP	TRINITY_DN64602_c0_g1	TraesCS4D01G201100.1	271	343	903	5.06e-31	TraesCS4D01G201100	chr4D	348295322	348299501	Glutathione-S-transferase
	TRINITY_DN27587_c0_g1	7.50727	7.4e-14	2.97e-12	UP	NA	NA	NA	NA	NA	NA	NA	NA	NA	NA	NA
	TRINITY_DN13169_c1_g1	9.60741	7.42e-14	2.97e-12	UP	NA	NA	NA	NA	NA	NA	NA	NA	NA	NA	NA
	TRINITY_DN239157_c0_g1	9.63764	7.66e-14	3.07e-12	UP	TRINITY_DN239157_c0_g1	TraesCS2A01G257600.1	304	81	1236	2.3e-113	TraesCS2A01G257600	chr2A	398470473	398472285	Glutamyl-tRNA(Gln) amidotransferase subunit B, mitochondrial
	TRINITY_DN2394_c1_g2	8.82539	7.66e-14	3.07e-12	UP	NA	NA	NA	NA	NA	NA	NA	NA	NA	NA	NA
	TRINITY_DN14735_c0_g2	7.52246	7.72e-14	3.09e-12	UP	TRINITY_DN14735_c0_g2	TraesCS1D01G029900.1	2243	3210	3210	0	TraesCS1D01G029900	chr1D	11658941	11662150	NBS-LRR disease resistance protein-like protein
	TRINITY_DN30022_c1_g1	7.84435	7.85e-14	3.14e-12	UP	TRINITY_DN30022_c1_g1	TraesCS1B01G065400.1	17	76	396	2.51e-23	TraesCS1B01G065400	chr1B	49795827	49796222	26S proteasome non-ATPase regulatory subunit-like protein
	TRINITY_DN23625_c0_g1	9.74745	7.92e-14	3.16e-12	UP	NA	NA	NA	NA	NA	NA	NA	NA	NA	NA	NA
	TRINITY_DN8041_c0_g1	3.00461	7.92e-14	3.16e-12	UP	TRINITY_DN8041_c0_g1	TraesCS5B01G161600.1	159	314	315	1.11e-63	TraesCS5B01G161600	chr5B	297984928	297986388	P450 reductase 2
	TRINITY_DN43612_c0_g1	9.72578	8.01e-14	3.2e-12	UP	TRINITY_DN43612_c0_g1	TraesCS4A01G211200.1	474	552	561	7.32e-24	TraesCS4A01G211200	chr4A	504860925	504875568	Polyamine oxidase-like protein
	TRINITY_DN1196_c9_g1	5.12572	8.09e-14	3.23e-12	UP	TRINITY_DN1196_c9_g1	TraesCS2B01G259200.1	1473	1	1473	0	TraesCS2B01G259200	chr2B	320938819	320940291	MEI2-like 2
	TRINITY_DN39144_c0_g2	5.43387	8.15e-14	3.25e-12	UP	NA	NA	NA	NA	NA	NA	NA	NA	NA	NA	NA
	TRINITY_DN63796_c0_g1	9.92231	8.29e-14	3.3e-12	UP	TRINITY_DN63796_c0_g1	TraesCS3D01G487500.1	1189	1116	1254	7.31e-20	TraesCS3D01G487500	chr3D	582832099	582833380	U3 small nucleolar RNA-associated protein 18-like protein
	TRINITY_DN9990_c0_g1	4.8857	8.37e-14	3.33e-12	UP	TRINITY_DN9990_c0_g1	TraesCS7D01G355200.1	380	633	1191	5.53e-130	TraesCS7D01G355200	chr7D	459397776	459398966	Protein RMD5-like protein A
	TRINITY_DN15470_c1_g1	4.08938	8.39e-14	3.34e-12	UP	TRINITY_DN15470_c1_g1	TraesCS7B01G064100.1	1	106	660	2.83e-49	TraesCS7B01G064100	chr7B	69786320	69787558	Chaperone protein dnaJ
	TRINITY_DN21470_c0_g1	4.46993	8.48e-14	3.37e-12	UP	TRINITY_DN21470_c0_g1	TraesCS2A01G287700.1	618	307	663	2.38e-114	TraesCS2A01G287700	chr2A	491459630	491461700	Protein DYAD
	TRINITY_DN25735_c0_g1	9.59566	8.5e-14	3.38e-12	UP	TRINITY_DN25735_c0_g1	TraesCS7D01G351000.1	1178	1260	1260	1.15e-36	TraesCS7D01G351000	chr7D	451966701	451969342	Acyl-[acyl-carrier-protein] hydrolase
	TRINITY_DN50271_c0_g1	9.6145	8.62e-14	3.42e-12	UP	TRINITY_DN50271_c0_g1	TraesCS1B01G389200.1	1	69	1140	6.73e-29	TraesCS1B01G389200	chr1B	622706636	622708876	Alcohol dehydrogenase
	TRINITY_DN23612_c0_g1	7.59357	8.63e-14	3.42e-12	UP	NA	NA	NA	NA	NA	NA	NA	NA	NA	NA	NA
	TRINITY_DN49146_c0_g1	7.6278	8.75e-14	3.47e-12	UP	NA	NA	NA	NA	NA	NA	NA	NA	NA	NA	NA
	TRINITY_DN12247_c0_g4	10.0957	8.9e-14	3.52e-12	UP	NA	NA	NA	NA	NA	NA	NA	NA	NA	NA	NA
	TRINITY_DN17259_c0_g1	3.13164	8.93e-14	3.54e-12	UP	TRINITY_DN17259_c0_g1	TraesCS7A01G175400.1	1	441	441	0	TraesCS7A01G175400	chr7A	128911264	128912304	Blue copper protein
	TRINITY_DN60181_c0_g1	7.41496	8.95e-14	3.54e-12	UP	TRINITY_DN60181_c0_g1	TraesCS4A01G175800.1	71	627	627	0	TraesCS4A01G175800	chr4A	446947342	446948046	DNA ligase
	TRINITY_DN41746_c0_g2	9.86795	9.12e-14	3.61e-12	UP	NA	NA	NA	NA	NA	NA	NA	NA	NA	NA	NA
	TRINITY_DN38696_c1_g1	11.0187	9.16e-14	3.62e-12	UP	TRINITY_DN38696_c1_g1	TraesCS3D01G064400.1	10	614	651	8.42e-87	TraesCS3D01G064400	chr3D	28462218	28462868	Transposon Ty3-G Gag-Pol polyprotein
	TRINITY_DN16010_c1_g3	9.7898	9.17e-14	3.62e-12	UP	NA	NA	NA	NA	NA	NA	NA	NA	NA	NA	NA
	TRINITY_DN205231_c0_g1	9.87406	9.17e-14	3.62e-12	UP	NA	NA	NA	NA	NA	NA	NA	NA	NA	NA	NA
	TRINITY_DN26383_c0_g1	4.68316	9.38e-14	3.7e-12	UP	NA	NA	NA	NA	NA	NA	NA	NA	NA	NA	NA
	TRINITY_DN19351_c0_g1	6.27841	9.64e-14	3.8e-12	UP	TRINITY_DN19351_c0_g1	TraesCS5A01G475300.1	614	1047	1047	0	TraesCS5A01G475300	chr5A	650554068	650555114	rRNA N-glycosidase
	TRINITY_DN20793_c0_g1	7.49122	1.01e-13	3.96e-12	UP	NA	NA	NA	NA	NA	NA	NA	NA	NA	NA	NA
	TRINITY_DN62747_c0_g1	5.42757	1.02e-13	4e-12	UP	TRINITY_DN62747_c0_g1	TraesCS3B01G123000.1	483	548	603	4.15e-27	TraesCS3B01G123000	chr3B	94666367	94668323	Translation machinery-associated protein 22
	TRINITY_DN24462_c0_g3	6.58833	1.02e-13	4.01e-12	UP	NA	NA	NA	NA	NA	NA	NA	NA	NA	NA	NA
	TRINITY_DN1159_c3_g1	2.97146	1.03e-13	4.03e-12	UP	TRINITY_DN1159_c3_g1	TraesCS6B01G187500.2	98	1206	1206	0	TraesCS6B01G187500	chr6B	214025798	214028666	Phosphoglycerate kinase
	TRINITY_DN11226_c0_g1	5.3169	1.03e-13	4.04e-12	UP	TRINITY_DN11226_c0_g1	TraesCS7A01G038400.1	2934	3072	3072	1.24e-49	TraesCS7A01G038400	chr7A	17327701	17331138	Embryogenesis transmembrane protein-like
	TRINITY_DN46387_c0_g1	9.65496	1.04e-13	4.06e-12	UP	TRINITY_DN46387_c0_g1	TraesCS4B01G380700.1	388	878	1281	0	TraesCS4B01G380700	chr4B	660705282	660707282	Trichome birefringence-like protein
	TRINITY_DN41926_c0_g1	9.72304	1.06e-13	4.14e-12	UP	TRINITY_DN41926_c0_g1	TraesCS2A01G023400.1	2021	2314	2943	3.83e-142	TraesCS2A01G023400	chr2A	11372891	11379765	Disease resistance protein (NBS-LRR class) family
	TRINITY_DN18246_c2_g1	9.70017	1.06e-13	4.15e-12	UP	NA	NA	NA	NA	NA	NA	NA	NA	NA	NA	NA
	TRINITY_DN60594_c0_g1	10.0171	1.08e-13	4.24e-12	UP	TRINITY_DN60594_c0_g1	TraesCS5D01G367300.1	48	241	1917	1.57e-64	TraesCS5D01G367300	chr5D	443634726	443638476	Tetratricopeptide repeat (TPR)-like superfamily protein
	TRINITY_DN18132_c0_g1	4.59859	1.09e-13	4.24e-12	UP	TRINITY_DN18132_c0_g1	TraesCS3A01G331300.1	1	1299	1299	0	TraesCS3A01G331300	chr3A	575870203	575872143	Auxin efflux carrier component
	TRINITY_DN141810_c0_g3	10.2207	1.09e-13	4.24e-12	UP	TRINITY_DN141810_c0_g3	TraesCS7D01G545800.1	2625	2929	3954	6.48e-160	TraesCS7D01G545800	chr7D	632801275	632820118	receptor kinase 1
	TRINITY_DN174116_c0_g1	7.34355	1.11e-13	4.33e-12	UP	NA	NA	NA	NA	NA	NA	NA	NA	NA	NA	NA
	TRINITY_DN44638_c2_g1	11.2304	1.13e-13	4.4e-12	UP	NA	NA	NA	NA	NA	NA	NA	NA	NA	NA	NA
	TRINITY_DN38264_c0_g1	9.72951	1.13e-13	4.4e-12	UP	NA	NA	NA	NA	NA	NA	NA	NA	NA	NA	NA
	TRINITY_DN11974_c0_g2	4.13018	1.13e-13	4.41e-12	UP	TRINITY_DN11974_c0_g2	TraesCS1D01G284000.1	1218	1601	1845	8.12e-180	TraesCS1D01G284000	chr1D	382234639	382237640	70 kDa heat shock protein
	TRINITY_DN20445_c0_g1	6.56703	1.14e-13	4.42e-12	UP	NA	NA	NA	NA	NA	NA	NA	NA	NA	NA	NA
	TRINITY_DN140923_c0_g1	9.63179	1.14e-13	4.43e-12	UP	NA	NA	NA	NA	NA	NA	NA	NA	NA	NA	NA
	TRINITY_DN43198_c0_g2	5.1009	1.14e-13	4.43e-12	UP	NA	NA	NA	NA	NA	NA	NA	NA	NA	NA	NA
	TRINITY_DN14159_c0_g1	4.78734	1.14e-13	4.44e-12	UP	TRINITY_DN14159_c0_g1	TraesCS5A01G482100.1	1	1248	1248	0	TraesCS5A01G482100	chr5A	654073774	654075124	Trichome birefringence-like protein
	TRINITY_DN5996_c0_g2	9.57999	1.17e-13	4.53e-12	UP	NA	NA	NA	NA	NA	NA	NA	NA	NA	NA	NA
	TRINITY_DN36549_c1_g1	10.2736	1.18e-13	4.57e-12	UP	NA	NA	NA	NA	NA	NA	NA	NA	NA	NA	NA
	TRINITY_DN28973_c0_g2	6.05546	1.19e-13	4.62e-12	UP	TRINITY_DN28973_c0_g2	TraesCS3D01G544100.1	323	569	1161	2.67e-41	TraesCS3D01G544100	chr3D	613779820	613782644	Phosphatase 2C family protein
	TRINITY_DN244843_c0_g1	9.6714	1.21e-13	4.7e-12	UP	TRINITY_DN244843_c0_g1	TraesCS2A01G136800.1	573	631	1281	3.1e-23	TraesCS2A01G136800	chr2A	82350162	82354771	Chaperone protein dnaJ-related
	TRINITY_DN55274_c0_g1	10.5185	1.24e-13	4.8e-12	UP	TRINITY_DN55274_c0_g1	TraesCS1A01G055400.1	1755	1940	2292	5.45e-63	TraesCS1A01G055400	chr1A	36562050	36569405	DIS3-like exonuclease 2
	TRINITY_DN19143_c0_g1	9.7764	1.26e-13	4.86e-12	UP	NA	NA	NA	NA	NA	NA	NA	NA	NA	NA	NA
	TRINITY_DN8141_c0_g4	9.98416	1.28e-13	4.96e-12	UP	TRINITY_DN8141_c0_g4	TraesCS2A01G361100.2	894	851	894	7.31e-13	TraesCS2A01G361100	chr2A	605164949	605171281	Disease resistance protein (NBS-LRR class) family
	TRINITY_DN4245_c0_g1	7.58146	1.31e-13	5.04e-12	UP	TRINITY_DN4245_c0_g1	TraesCS2A01G197700.1	414	622	1278	1.6e-75	TraesCS2A01G197700	chr2A	167332422	167336960	Vacuole membrane-like protein
	TRINITY_DN20642_c0_g1	10.5488	1.31e-13	5.06e-12	UP	NA	NA	NA	NA	NA	NA	NA	NA	NA	NA	NA
	TRINITY_DN60141_c0_g1	3.51297	1.32e-13	5.08e-12	UP	TRINITY_DN60141_c0_g1	TraesCS2A01G050600.1	1438	1505	1938	1.17e-26	TraesCS2A01G050600	chr2A	19646183	19652126	Peptidylprolyl isomerase
	TRINITY_DN9896_c0_g2	5.87743	1.32e-13	5.08e-12	UP	TRINITY_DN9896_c0_g2	TraesCS3D01G157300.1	140	210	210	2.49e-29	TraesCS3D01G157300	chr3D	125482328	125483973	Cx9C motif-containing protein 4, mitochondrial
	TRINITY_DN9065_c0_g1	7.80915	1.35e-13	5.2e-12	UP	TRINITY_DN9065_c0_g1	TraesCS6B01G119600.1	1	272	369	4.66e-128	TraesCS6B01G119600	chr6B	114260361	114260890	Late embryogenesis abundant protein
	TRINITY_DN23612_c1_g1	10.0463	1.35e-13	5.2e-12	UP	NA	NA	NA	NA	NA	NA	NA	NA	NA	NA	NA
	TRINITY_DN48183_c1_g1	3.20665	1.36e-13	5.23e-12	UP	TRINITY_DN48183_c1_g1	TraesCS5A01G267500.1	589	948	948	6.31e-161	TraesCS5A01G267500	chr5A	478856993	478857940	Splicing factor U2af small subunit A
	TRINITY_DN37647_c0_g2	3.69795	1.38e-13	5.31e-12	UP	TRINITY_DN37647_c0_g2	TraesCS6D01G349000.1	375	483	483	1.3e-50	TraesCS6D01G349000	chr6D	446901928	446903185	Serine-rich protein
	TRINITY_DN1363_c2_g1	5.48829	1.38e-13	5.31e-12	UP	TRINITY_DN1363_c2_g1	TraesCSU01G149500.1	23	87	909	1.4e-13	TraesCSU01G149500	chrUn	178682261	178683427	CsAtPR5
	TRINITY_DN232213_c0_g1	9.89076	1.41e-13	5.4e-12	UP	TRINITY_DN232213_c0_g1	TraesCS7D01G320900.1	1407	1150	1458	7.23e-134	TraesCS7D01G320900	chr7D	411009436	411012573	Pectin lyase-like superfamily protein
	TRINITY_DN94705_c0_g1	7.08253	1.42e-13	5.45e-12	UP	TRINITY_DN94705_c0_g1	TraesCS2D01G110000.1	1	320	600	4.32e-163	TraesCS2D01G110000	chr2D	61021556	61022267	Ethylene-responsive transcription factor
	TRINITY_DN77297_c0_g1	9.65127	1.45e-13	5.57e-12	UP	NA	NA	NA	NA	NA	NA	NA	NA	NA	NA	NA
	TRINITY_DN132691_c0_g3	4.90819	1.45e-13	5.58e-12	UP	TRINITY_DN132691_c0_g3	TraesCS6D01G364400.1	537	607	1344	6.79e-30	TraesCS6D01G364400	chr6D	454230135	454233225	COBRA-like protein
	TRINITY_DN111078_c0_g1	9.74813	1.45e-13	5.58e-12	UP	TRINITY_DN111078_c0_g1	TraesCS7B01G122600.1	611	640	642	3.7e-07	TraesCS7B01G122600	chr7B	144068013	144078462	Aquaporin
	TRINITY_DN1660_c2_g1	10.2932	1.46e-13	5.58e-12	UP	NA	NA	NA	NA	NA	NA	NA	NA	NA	NA	NA
	TRINITY_DN5206_c0_g1	3.42406	1.46e-13	5.6e-12	UP	TRINITY_DN5206_c0_g1	TraesCS5B01G150600.1	1	1743	1743	0	TraesCS5B01G150600	chr5B	278230258	278236986	Nodulin-like / Major Facilitator Superfamily protein
	TRINITY_DN148834_c0_g1	9.62805	1.46e-13	5.6e-12	UP	NA	NA	NA	NA	NA	NA	NA	NA	NA	NA	NA
	TRINITY_DN16546_c1_g1	10.3292	1.48e-13	5.66e-12	UP	TRINITY_DN16546_c1_g1	TraesCS3B01G030500.1	1648	1486	1926	3.55e-65	TraesCS3B01G030500	chr3B	13961475	13964705	Receptor-like kinase
	TRINITY_DN1192_c0_g1	4.05677	1.48e-13	5.67e-12	UP	TRINITY_DN1192_c0_g1	TraesCS7A01G554600.1	6	427	468	5.09e-106	TraesCS7A01G554600	chr7A	726905999	726907908	eukaryotic release factor 1-1
	TRINITY_DN16811_c0_g1	6.3498	1.49e-13	5.68e-12	UP	TRINITY_DN16811_c0_g1	TraesCS3D01G349000.1	183	960	960	0	TraesCS3D01G349000	chr3D	460441254	460442936	Alpha/beta-Hydrolases superfamily protein
	TRINITY_DN7926_c0_g1	3.85681	1.49e-13	5.7e-12	UP	TRINITY_DN7926_c0_g1	TraesCS1A01G231200.1	94	300	543	2.46e-103	TraesCS1A01G231200	chr1A	403830530	403831202	Ethylene-responsive transcription factor
	TRINITY_DN21276_c0_g1	3.82907	1.5e-13	5.73e-12	UP	NA	NA	NA	NA	NA	NA	NA	NA	NA	NA	NA
	TRINITY_DN20831_c0_g1	4.89618	1.51e-13	5.77e-12	UP	TRINITY_DN20831_c0_g1	TraesCS2B01G396700.1	518	617	873	6.6e-44	TraesCS2B01G396700	chr2B	563043854	563046441	Aquaporin
	TRINITY_DN19145_c0_g1	3.24913	1.52e-13	5.79e-12	UP	NA	NA	NA	NA	NA	NA	NA	NA	NA	NA	NA
	TRINITY_DN66643_c0_g2	9.59442	1.56e-13	5.94e-12	UP	NA	NA	NA	NA	NA	NA	NA	NA	NA	NA	NA
	TRINITY_DN6193_c0_g1	3.58698	1.56e-13	5.95e-12	UP	TRINITY_DN6193_c0_g1	TraesCS2D01G177100.1	1	984	984	0	TraesCS2D01G177100	chr2D	120565102	120566185	SPX domain-containing protein
	TRINITY_DN28998_c0_g1	10.0082	1.58e-13	6e-12	UP	TRINITY_DN28998_c0_g1	TraesCS5D01G031700.1	229	423	819	7.6e-99	TraesCS5D01G031700	chr5D	29132316	29134261	2-aminoethanethiol dioxygenase
	TRINITY_DN52926_c0_g1	10.68	1.58e-13	6e-12	UP	TRINITY_DN52926_c0_g1	TraesCS5B01G023400.1	828	873	873	6.72e-11	TraesCS5B01G023400	chr5B	21598828	21606365	2-aminoethanethiol dioxygenase
	TRINITY_DN15035_c0_g2	9.55069	1.63e-13	6.18e-12	UP	NA	NA	NA	NA	NA	NA	NA	NA	NA	NA	NA
	TRINITY_DN35328_c0_g1	6.1447	1.65e-13	6.25e-12	UP	TRINITY_DN35328_c0_g1	TraesCS5D01G266000.1	220	458	744	5.28e-123	TraesCS5D01G266000	chr5D	370310980	370311837	Heat shock protein, putative
	TRINITY_DN14320_c1_g1	13.534	1.65e-13	6.25e-12	UP	NA	NA	NA	NA	NA	NA	NA	NA	NA	NA	NA
	TRINITY_DN42687_c0_g1	4.29027	1.65e-13	6.26e-12	UP	TRINITY_DN42687_c0_g1	TraesCS7B01G354100.1	1	376	918	6.37e-151	TraesCS7B01G354100	chr7B	611961698	611962747	Polyubiquitin
	TRINITY_DN1671_c2_g1	9.54678	1.66e-13	6.29e-12	UP	TRINITY_DN1671_c2_g1	TraesCS6A01G319400.2	1	192	1179	4.22e-97	TraesCS6A01G319400	chr6A	554832779	554836056	F-box family protein
	TRINITY_DN19236_c6_g1	9.54678	1.66e-13	6.29e-12	UP	NA	NA	NA	NA	NA	NA	NA	NA	NA	NA	NA
	TRINITY_DN23715_c0_g1	12.8554	1.67e-13	6.31e-12	UP	NA	NA	NA	NA	NA	NA	NA	NA	NA	NA	NA
	TRINITY_DN28030_c1_g1	11.7698	1.69e-13	6.39e-12	UP	NA	NA	NA	NA	NA	NA	NA	NA	NA	NA	NA
	TRINITY_DN7537_c0_g2	4.21984	1.74e-13	6.56e-12	UP	TRINITY_DN7537_c0_g2	TraesCSU01G228000.1	149	222	255	2.26e-31	TraesCSU01G228000	chrUn	337950462	337950716	piezo-type mechanosensitive ion channel component
	TRINITY_DN112724_c1_g1	9.55459	1.76e-13	6.65e-12	UP	NA	NA	NA	NA	NA	NA	NA	NA	NA	NA	NA
	TRINITY_DN4196_c0_g3	4.81496	1.79e-13	6.74e-12	UP	TRINITY_DN4196_c0_g3	TraesCS1B01G369400.1	1	783	783	0	TraesCS1B01G369400	chr1B	599569931	599572107	Acid phosphatase/vanadium-dependent haloperoxidase-related protein
	TRINITY_DN14219_c0_g4	10.128	1.79e-13	6.74e-12	UP	NA	NA	NA	NA	NA	NA	NA	NA	NA	NA	NA
	TRINITY_DN55151_c0_g1	6.60117	1.8e-13	6.78e-12	UP	TRINITY_DN55151_c0_g1	TraesCS2B01G056900.1	502	463	513	1.65e-10	TraesCS2B01G056900	chr2B	27715435	27718795	Histone acetyltransferase
	TRINITY_DN18009_c0_g1	3.86294	1.8e-13	6.78e-12	UP	TRINITY_DN18009_c0_g1	TraesCS7A01G242200.1	73	311	2103	2.42e-123	TraesCS7A01G242200	chr7A	217555694	217559742	Heat shock protein 90
	TRINITY_DN45598_c0_g2	9.75474	1.8e-13	6.79e-12	UP	NA	NA	NA	NA	NA	NA	NA	NA	NA	NA	NA
	TRINITY_DN27717_c0_g1	10.4012	1.88e-13	7.06e-12	UP	NA	NA	NA	NA	NA	NA	NA	NA	NA	NA	NA
	TRINITY_DN18246_c0_g2	10.1334	1.89e-13	7.09e-12	UP	NA	NA	NA	NA	NA	NA	NA	NA	NA	NA	NA
	TRINITY_DN9202_c0_g2	4.09751	1.94e-13	7.25e-12	UP	TRINITY_DN9202_c0_g2	TraesCS4A01G097900.1	1	188	1956	3.12e-88	TraesCS4A01G097900	chr4A	109423673	109426774	70 kDa heat shock protein
	TRINITY_DN7074_c0_g1	6.86542	1.94e-13	7.28e-12	UP	TRINITY_DN7074_c0_g1	TraesCS3B01G287400.1	500	364	705	5.7e-64	TraesCS3B01G287400	chr3B	460162442	460163146	Envelope membrane protein
	TRINITY_DN36598_c0_g2	3.12584	1.98e-13	7.42e-12	UP	TRINITY_DN36598_c0_g2	TraesCS2A01G360000.1	356	474	480	2.84e-37	TraesCS2A01G360000	chr2A	603855754	603856938	Cysteine-rich receptor-like protein kinase 41
	TRINITY_DN94049_c1_g1	10.2429	1.99e-13	7.43e-12	UP	NA	NA	NA	NA	NA	NA	NA	NA	NA	NA	NA
	TRINITY_DN64840_c0_g1	9.53058	1.99e-13	7.45e-12	UP	TRINITY_DN64840_c0_g1	TraesCS4A01G492700.1	542	575	675	1.38e-07	TraesCS4A01G492700	chr4A	741588190	741588864	Glutaredoxin family protein, expressed
	TRINITY_DN242_c2_g1	4.95003	2.03e-13	7.6e-12	UP	NA	NA	NA	NA	NA	NA	NA	NA	NA	NA	NA
	TRINITY_DN9239_c0_g2	9.67044	2.06e-13	7.68e-12	UP	TRINITY_DN9239_c0_g2	TraesCS5D01G427700.1	1	214	336	7.75e-97	TraesCS5D01G427700	chr5D	485814823	485818665	High mobility group protein 1
	TRINITY_DN7686_c3_g3	9.52614	2.06e-13	7.68e-12	UP	TRINITY_DN7686_c3_g3	TraesCS4A01G444500.1	1	110	495	6.68e-50	TraesCS4A01G444500	chr4A	712915290	712917030	Haloacid dehalogenase-like hydrolase domain-containing protein 3
	TRINITY_DN54513_c0_g1	9.52662	2.1e-13	7.83e-12	UP	TRINITY_DN54513_c0_g1	TraesCS7A01G504600.1	1	237	237	3.95e-75	TraesCS7A01G504600	chr7A	692784656	692784892	fimbrin 1
	TRINITY_DN20686_c0_g1	4.09477	2.1e-13	7.83e-12	UP	TRINITY_DN20686_c0_g1	TraesCS4A01G110600.1	1377	1449	1731	4.67e-31	TraesCS4A01G110600	chr4A	135342841	135346849	Chaperone protein DnaJ
	TRINITY_DN3397_c1_g1	3.67294	2.11e-13	7.86e-12	UP	TRINITY_DN3397_c1_g1	TraesCS7B01G139300.1	1	723	723	0	TraesCS7B01G139300	chr7B	175895933	175896965	D-alanine-D-alanine ligase family
	TRINITY_DN48444_c0_g1	10.1265	2.15e-13	7.99e-12	UP	NA	NA	NA	NA	NA	NA	NA	NA	NA	NA	NA
	TRINITY_DN21371_c0_g2	9.56239	2.15e-13	7.99e-12	UP	NA	NA	NA	NA	NA	NA	NA	NA	NA	NA	NA
	TRINITY_DN91387_c0_g2	9.56239	2.15e-13	7.99e-12	UP	TRINITY_DN91387_c0_g2	TraesCS3A01G297200.1	1067	955	1068	3.71e-53	TraesCS3A01G297200	chr3A	531896270	531897423	Peroxidase
	TRINITY_DN1048_c0_g1	6.89282	2.16e-13	8.04e-12	UP	TRINITY_DN1048_c0_g1	TraesCS5B01G478300.1	1	452	468	0	TraesCS5B01G478300	chr5B	650132159	650132721	Wound-induced protease inhibitor
	TRINITY_DN7967_c0_g2	4.39259	2.17e-13	8.06e-12	UP	TRINITY_DN7967_c0_g2	TraesCS2A01G360000.1	473	397	480	3.47e-21	TraesCS2A01G360000	chr2A	603855754	603856938	Cysteine-rich receptor-like protein kinase 41
	TRINITY_DN16358_c0_g3	6.21618	2.19e-13	8.13e-12	UP	TRINITY_DN16358_c0_g3	TraesCS1A01G370100.1	1	88	1143	5.12e-32	TraesCS1A01G370100	chr1A	547391832	547395833	Alcohol dehydrogenase
	TRINITY_DN199_c0_g2	5.00495	2.19e-13	8.13e-12	UP	TRINITY_DN199_c0_g2	TraesCS4A01G278000.1	1	183	195	9.3e-88	TraesCS4A01G278000	chr4A	585556795	585557127	RING/U-box superfamily protein
	TRINITY_DN36165_c0_g1	9.69295	2.19e-13	8.14e-12	UP	NA	NA	NA	NA	NA	NA	NA	NA	NA	NA	NA
	TRINITY_DN50921_c1_g1	9.92859	2.2e-13	8.15e-12	UP	TRINITY_DN50921_c1_g1	TraesCSU01G190600.1	837	637	963	1.23e-100	TraesCSU01G190600	chrUn	287416834	287418171	F-box protein PP2
	TRINITY_DN71599_c5_g1	10.4944	2.2e-13	8.15e-12	UP	NA	NA	NA	NA	NA	NA	NA	NA	NA	NA	NA
	TRINITY_DN14195_c0_g1	7.73577	2.21e-13	8.18e-12	UP	TRINITY_DN14195_c0_g1	TraesCS4B01G118400.1	361	433	588	1.15e-27	TraesCS4B01G118400	chr4B	138616215	138618321	Mediator of DNA damage checkpoint protein 1
	TRINITY_DN7391_c0_g1	3.75501	2.27e-13	8.4e-12	UP	TRINITY_DN7391_c0_g1	TraesCS5D01G412900.1	1	237	237	1e-119	TraesCS5D01G412900	chr5D	476011202	476011438	ATPase E1-E2 type family protein / haloacid dehalogenase-like hydrolase family protein
	TRINITY_DN15126_c0_g2	9.56025	2.28e-13	8.41e-12	UP	NA	NA	NA	NA	NA	NA	NA	NA	NA	NA	NA
	TRINITY_DN16943_c1_g2	9.56025	2.28e-13	8.41e-12	UP	TRINITY_DN16943_c1_g2	TraesCS7D01G545800.1	2227	2566	3954	2.54e-179	TraesCS7D01G545800	chr7D	632801275	632820118	receptor kinase 1
	TRINITY_DN52407_c0_g3	9.52265	2.3e-13	8.5e-12	UP	NA	NA	NA	NA	NA	NA	NA	NA	NA	NA	NA
	TRINITY_DN111930_c4_g1	9.59023	2.32e-13	8.56e-12	UP	NA	NA	NA	NA	NA	NA	NA	NA	NA	NA	NA
	TRINITY_DN92068_c0_g1	9.59023	2.32e-13	8.56e-12	UP	NA	NA	NA	NA	NA	NA	NA	NA	NA	NA	NA
	TRINITY_DN31519_c0_g1	3.72961	2.34e-13	8.62e-12	UP	NA	NA	NA	NA	NA	NA	NA	NA	NA	NA	NA
	TRINITY_DN25189_c2_g1	6.53395	2.34e-13	8.62e-12	UP	TRINITY_DN25189_c2_g1	TraesCS7B01G409900.1	1	240	483	5.67e-123	TraesCS7B01G409900	chr7B	678897014	678901015	2-oxoglutarate (2OG) and Fe(II)-dependent oxygenase superfamily protein
	TRINITY_DN3964_c1_g1	4.30356	2.43e-13	8.94e-12	UP	NA	NA	NA	NA	NA	NA	NA	NA	NA	NA	NA
	TRINITY_DN20278_c0_g1	10.346	2.45e-13	9.01e-12	UP	TRINITY_DN20278_c0_g1	TraesCS1B01G022100.1	1	96	1926	9.55e-42	TraesCS1B01G022100	chr1B	10014740	10017493	NBS-LRR disease resistance protein-like protein
	TRINITY_DN28597_c0_g1	5.92327	2.45e-13	9.01e-12	UP	TRINITY_DN28597_c0_g1	TraesCS2A01G179500.1	384	438	438	6.24e-11	TraesCS2A01G179500	chr2A	138133652	138134089	IgA FC receptor
	TRINITY_DN495_c0_g1	4.9972	2.48e-13	9.12e-12	UP	TRINITY_DN495_c0_g1	TraesCS4A01G087800.1	2078	3840	3840	0	TraesCS4A01G087800	chr4A	92725327	92740345	Replication factor C large subunit
	TRINITY_DN37354_c0_g1	12.1247	2.49e-13	9.14e-12	UP	NA	NA	NA	NA	NA	NA	NA	NA	NA	NA	NA
	TRINITY_DN63990_c0_g1	7.26042	2.51e-13	9.22e-12	UP	TRINITY_DN63990_c0_g1	TraesCSU01G176800.1	1	1410	2193	0	TraesCSU01G176800	chrUn	266536830	266539120	Kinase, putative
	TRINITY_DN9464_c0_g1	9.88709	2.51e-13	9.22e-12	UP	NA	NA	NA	NA	NA	NA	NA	NA	NA	NA	NA
	TRINITY_DN24882_c1_g1	5.02918	2.53e-13	9.27e-12	UP	NA	NA	NA	NA	NA	NA	NA	NA	NA	NA	NA
	TRINITY_DN7790_c6_g1	10.0111	2.56e-13	9.39e-12	UP	NA	NA	NA	NA	NA	NA	NA	NA	NA	NA	NA
	TRINITY_DN11423_c2_g1	9.73689	2.61e-13	9.57e-12	UP	TRINITY_DN11423_c2_g1	TraesCS7B01G170700.1	39	1	525	4.43e-12	TraesCS7B01G170700	chr7B	242910585	242911109	Photosystem II reaction center PsbP family protein
	TRINITY_DN31702_c1_g1	10.4598	2.63e-13	9.62e-12	UP	NA	NA	NA	NA	NA	NA	NA	NA	NA	NA	NA
	TRINITY_DN77463_c1_g1	9.82418	2.65e-13	9.7e-12	UP	TRINITY_DN77463_c1_g1	TraesCS5A01G045100.1	344	476	570	1.04e-33	TraesCS5A01G045100	chr5A	41088072	41091334	Glutaredoxin family protein
	TRINITY_DN13302_c0_g1	10.4324	2.66e-13	9.74e-12	UP	TRINITY_DN13302_c0_g1	TraesCS2D01G000500.1	651	858	2331	3.59e-96	TraesCS2D01G000500	chr2D	273721	276680	Ethylene receptor
	TRINITY_DN13771_c0_g2	7.84378	2.68e-13	9.79e-12	UP	NA	NA	NA	NA	NA	NA	NA	NA	NA	NA	NA
	TRINITY_DN45539_c0_g1	4.06128	2.69e-13	9.83e-12	UP	TRINITY_DN45539_c0_g1	TraesCS2A01G525000.1	75	495	1326	0	TraesCS2A01G525000	chr2A	745428094	745430174	Anthocyanin 5-aromatic acyltransferase
	TRINITY_DN83856_c0_g1	9.98484	2.79e-13	1.02e-11	UP	TRINITY_DN83856_c0_g1	TraesCS7A01G429600.1	517	558	558	1.43e-13	TraesCS7A01G429600	chr7A	624687279	624687936	Adaptin ear-binding coat-associated protein 1
	TRINITY_DN36271_c0_g1	9.5057	2.84e-13	1.03e-11	UP	TRINITY_DN36271_c0_g1	TraesCS4D01G051700.1	12	350	369	4.7e-34	TraesCS4D01G051700	chr4D	27544037	27545350	Ubiquitin-like-specific protease 1A
	TRINITY_DN59273_c2_g1	9.5057	2.84e-13	1.03e-11	UP	TRINITY_DN59273_c2_g1	TraesCS7A01G561500.1	1176	1007	1176	8.9e-34	TraesCS7A01G561500	chr7A	732596946	732602222	DNA-binding protein RHL1
	TRINITY_DN50267_c0_g2	10.0229	2.85e-13	1.04e-11	UP	TRINITY_DN50267_c0_g2	TraesCS6B01G351600.1	163	435	996	3.53e-142	TraesCS6B01G351600	chr6B	617038049	617039512	2-oxoglutarate (2OG) and Fe(II)-dependent oxygenase superfamily protein
	TRINITY_DN80018_c2_g1	9.60589	2.87e-13	1.04e-11	UP	NA	NA	NA	NA	NA	NA	NA	NA	NA	NA	NA
	TRINITY_DN75046_c0_g1	9.81433	2.88e-13	1.05e-11	UP	TRINITY_DN75046_c0_g1	TraesCS5D01G062900.1	504	564	669	1.79e-24	TraesCS5D01G062900	chr5D	58504841	58507052	Glutathione S-transferase
	TRINITY_DN18180_c0_g1	4.84022	2.97e-13	1.08e-11	UP	TRINITY_DN18180_c0_g1	TraesCS6D01G077000.1	343	400	744	1.08e-22	TraesCS6D01G077000	chr6D	41520167	41528334	Bax inhibitor 1-like protein
	TRINITY_DN7452_c0_g2	9.53982	2.99e-13	1.08e-11	UP	TRINITY_DN7452_c0_g2	TraesCSU01G038400.1	121	1	1017	9.37e-58	TraesCSU01G038400	chrUn	31688902	31690396	ATP synthase subunit alpha, chloroplastic
	TRINITY_DN18694_c0_g1	10.1592	2.99e-13	1.08e-11	UP	TRINITY_DN18694_c0_g1	TraesCS2D01G248200.6	2185	2097	2244	2.65e-22	TraesCS2D01G248200	chr2D	291952565	291956637	Receptor protein kinase-like protein
	TRINITY_DN31409_c0_g1	9.65915	3.02e-13	1.09e-11	UP	NA	NA	NA	NA	NA	NA	NA	NA	NA	NA	NA
	TRINITY_DN5549_c2_g1	9.65915	3.02e-13	1.09e-11	UP	NA	NA	NA	NA	NA	NA	NA	NA	NA	NA	NA
	TRINITY_DN14054_c0_g1	5.16822	3.05e-13	1.1e-11	UP	TRINITY_DN14054_c0_g1	TraesCS7D01G179600.1	274	451	705	2.25e-85	TraesCS7D01G179600	chr7D	133193721	133194791	Heat-shock protein, putative
	TRINITY_DN16845_c0_g1	3.39003	3.08e-13	1.11e-11	UP	TRINITY_DN16845_c0_g1	TraesCS7D01G014000.1	1	91	357	8.79e-33	TraesCS7D01G014000	chr7D	6098288	6101958	5'-AMP-activated protein kinase beta-2 subunit protein
	TRINITY_DN112508_c3_g1	9.66675	3.08e-13	1.11e-11	UP	NA	NA	NA	NA	NA	NA	NA	NA	NA	NA	NA
	TRINITY_DN53385_c0_g1	3.75085	3.14e-13	1.13e-11	UP	TRINITY_DN53385_c0_g1	TraesCS7A01G242200.1	1390	1623	2103	1.45e-115	TraesCS7A01G242200	chr7A	217555694	217559742	Heat shock protein 90
	TRINITY_DN87339_c0_g1	9.65222	3.14e-13	1.13e-11	UP	TRINITY_DN87339_c0_g1	TraesCS7A01G210100.1	1312	1371	1650	7.61e-24	TraesCS7A01G210100	chr7A	173057794	173062381	Aldehyde dehydrogenase
	TRINITY_DN2966_c0_g1	3.97968	3.15e-13	1.14e-11	UP	TRINITY_DN2966_c0_g1	TraesCS1D01G284000.1	1773	1845	1845	2.19e-30	TraesCS1D01G284000	chr1D	382234639	382237640	70 kDa heat shock protein
	TRINITY_DN54548_c0_g1	9.66359	3.17e-13	1.14e-11	UP	NA	NA	NA	NA	NA	NA	NA	NA	NA	NA	NA
	TRINITY_DN15684_c0_g1	3.95748	3.18e-13	1.14e-11	UP	TRINITY_DN15684_c0_g1	TraesCS4A01G356200.1	88	168	633	1.12e-34	TraesCS4A01G356200	chr4A	629862606	629865014	Ferredoxin
	TRINITY_DN226872_c0_g1	9.77947	3.26e-13	1.17e-11	UP	TRINITY_DN226872_c0_g1	TraesCS3D01G113500.1	441	534	696	2.59e-29	TraesCS3D01G113500	chr3D	67534446	67536037	UV radiation resistance-associated gene protein
	TRINITY_DN58527_c0_g1	5.84726	3.27e-13	1.17e-11	UP	NA	NA	NA	NA	NA	NA	NA	NA	NA	NA	NA
	TRINITY_DN12473_c0_g1	4.20885	3.27e-13	1.17e-11	UP	TRINITY_DN12473_c0_g1	TraesCS1A01G120100.1	1	65	1686	2.09e-26	TraesCS1A01G120100	chr1A	132481070	132485645	70 kDa heat shock protein
	TRINITY_DN701_c4_g1	9.50472	3.27e-13	1.17e-11	UP	NA	NA	NA	NA	NA	NA	NA	NA	NA	NA	NA
	TRINITY_DN54525_c0_g2	4.2412	3.31e-13	1.19e-11	UP	TRINITY_DN54525_c0_g2	TraesCS3A01G161200.1	1	119	1038	4.9e-50	TraesCS3A01G161200	chr3A	162756053	162759732	Chaperone protein dnaJ
	TRINITY_DN19143_c0_g2	10.2328	3.32e-13	1.19e-11	UP	NA	NA	NA	NA	NA	NA	NA	NA	NA	NA	NA
	TRINITY_DN17580_c0_g4	10.2607	3.32e-13	1.19e-11	UP	TRINITY_DN17580_c0_g4	TraesCS3B01G604600.1	962	1062	1110	1.41e-28	TraesCS3B01G604600	chr3B	823294611	823305404	Disease resistance protein (NBS-LRR class) family
	TRINITY_DN662_c1_g1	5.57154	3.34e-13	1.2e-11	UP	TRINITY_DN662_c1_g1	TraesCS4B01G024300.1	1314	1617	1617	4.4e-159	TraesCS4B01G024300	chr4B	17362410	17368483	Ankyrin repeat family protein
	TRINITY_DN32376_c0_g2	10.0404	3.34e-13	1.2e-11	UP	NA	NA	NA	NA	NA	NA	NA	NA	NA	NA	NA
	TRINITY_DN54686_c0_g1	5.13222	3.35e-13	1.2e-11	UP	NA	NA	NA	NA	NA	NA	NA	NA	NA	NA	NA
	TRINITY_DN109495_c0_g1	12.342	3.36e-13	1.2e-11	UP	NA	NA	NA	NA	NA	NA	NA	NA	NA	NA	NA
	TRINITY_DN8826_c0_g1	3.52785	3.37e-13	1.2e-11	UP	TRINITY_DN8826_c0_g1	TraesCS1B01G394700.1	1	266	294	3.51e-138	TraesCS1B01G394700	chr1B	626649118	626649411	Lipid transfer protein
	TRINITY_DN53798_c0_g1	6.2936	3.38e-13	1.21e-11	UP	NA	NA	NA	NA	NA	NA	NA	NA	NA	NA	NA
	TRINITY_DN41912_c1_g1	5.00834	3.4e-13	1.21e-11	UP	TRINITY_DN41912_c1_g1	TraesCS2B01G585100.1	415	480	1083	1.94e-23	TraesCS2B01G585100	chr2B	772023506	772027608	Anamorsin homolog
	TRINITY_DN37406_c0_g1	9.78644	3.4e-13	1.21e-11	UP	TRINITY_DN37406_c0_g1	TraesCS7D01G477600.1	428	710	756	1.01e-147	TraesCS7D01G477600	chr7D	588553773	588558033	Ubiquitin-conjugating enzyme E2
	TRINITY_DN47915_c0_g1	10.7469	3.52e-13	1.25e-11	UP	TRINITY_DN47915_c0_g1	TraesCS4B01G379900.1	126	1	1281	1.72e-28	TraesCS4B01G379900	chr4B	660594418	660595698	Ribose-phosphate pyrophosphokinase
	TRINITY_DN55343_c1_g3	9.57409	3.52e-13	1.25e-11	UP	TRINITY_DN55343_c1_g3	TraesCS6A01G093600.1	91	33	735	6.76e-09	TraesCS6A01G093600	chr6A	61210055	61210789	Ig heavy chain V region VH558 B4
	TRINITY_DN4196_c0_g4	11.4149	3.53e-13	1.26e-11	UP	NA	NA	NA	NA	NA	NA	NA	NA	NA	NA	NA
	TRINITY_DN11745_c2_g1	6.08696	3.59e-13	1.27e-11	UP	TRINITY_DN11745_c2_g1	TraesCS1D01G403500.1	737	468	1086	4.45e-127	TraesCS1D01G403500	chr1D	467935742	467938371	Chaperone protein dnaJ
	TRINITY_DN14715_c0_g1	10.6808	3.6e-13	1.28e-11	UP	NA	NA	NA	NA	NA	NA	NA	NA	NA	NA	NA
	TRINITY_DN14961_c0_g2	6.36022	3.6e-13	1.28e-11	UP	TRINITY_DN14961_c0_g2	TraesCS3B01G440600.1	749	809	1143	6.7e-24	TraesCS3B01G440600	chr3B	680252643	680254869	F-box family protein
	TRINITY_DN18406_c1_g3	4.03901	3.62e-13	1.28e-11	UP	NA	NA	NA	NA	NA	NA	NA	NA	NA	NA	NA
	TRINITY_DN36887_c3_g1	10.727	3.63e-13	1.29e-11	UP	TRINITY_DN36887_c3_g1	TraesCS3A01G234700.3	55	6	1728	4.41e-18	TraesCS3A01G234700	chr3A	438356457	438372801	WD repeat protein
	TRINITY_DN1895_c4_g1	9.97878	3.64e-13	1.29e-11	UP	NA	NA	NA	NA	NA	NA	NA	NA	NA	NA	NA
	TRINITY_DN18528_c2_g1	9.85471	3.65e-13	1.29e-11	UP	NA	NA	NA	NA	NA	NA	NA	NA	NA	NA	NA
	TRINITY_DN23360_c0_g1	9.58606	3.65e-13	1.29e-11	UP	TRINITY_DN23360_c0_g1	TraesCS7D01G446100.1	636	960	1035	5.27e-171	TraesCS7D01G446100	chr7D	566554168	566558428	F-box/LRR repeat protein
	TRINITY_DN41141_c0_g3	9.58606	3.65e-13	1.29e-11	UP	TRINITY_DN41141_c0_g3	TraesCS3D01G324900.1	419	864	864	1.33e-143	TraesCS3D01G324900	chr3D	437754799	437755774	Retrotransposon protein, putative, Ty1-copia subclass
	TRINITY_DN73213_c0_g1	3.66402	3.69e-13	1.31e-11	UP	TRINITY_DN73213_c0_g1	TraesCS3D01G421300.1	1	101	1395	2.94e-41	TraesCS3D01G421300	chr3D	533723741	533726235	lysine ketoglutarate reductase trans-splicing-like protein, putative (DUF707)
	TRINITY_DN12783_c1_g2	9.80748	3.74e-13	1.32e-11	UP	NA	NA	NA	NA	NA	NA	NA	NA	NA	NA	NA
	TRINITY_DN81965_c3_g1	9.49616	3.78e-13	1.34e-11	UP	NA	NA	NA	NA	NA	NA	NA	NA	NA	NA	NA
	TRINITY_DN4228_c0_g1	4.6215	3.8e-13	1.34e-11	UP	NA	NA	NA	NA	NA	NA	NA	NA	NA	NA	NA
	TRINITY_DN5004_c0_g1	3.17706	3.81e-13	1.35e-11	UP	TRINITY_DN5004_c0_g1	TraesCS2D01G453100.1	1	333	333	1.19e-169	TraesCS2D01G453100	chr2D	562232068	562232400	senescence-associated family protein (DUF581)
	TRINITY_DN347_c0_g1	3.81611	3.84e-13	1.35e-11	UP	NA	NA	NA	NA	NA	NA	NA	NA	NA	NA	NA
	TRINITY_DN58197_c1_g1	9.9101	4e-13	1.41e-11	UP	TRINITY_DN58197_c1_g1	TraesCS2A01G360000.1	473	355	480	6.81e-10	TraesCS2A01G360000	chr2A	603855754	603856938	Cysteine-rich receptor-like protein kinase 41
	TRINITY_DN11827_c0_g1	4.35158	4.2e-13	1.48e-11	UP	NA	NA	NA	NA	NA	NA	NA	NA	NA	NA	NA
	TRINITY_DN33636_c0_g1	7.09355	4.21e-13	1.48e-11	UP	TRINITY_DN33636_c0_g1	TraesCS2A01G117500.1	216	75	1299	4.91e-67	TraesCS2A01G117500	chr2A	67708675	67713715	Ankyrin repeat protein-like
	TRINITY_DN46831_c2_g1	9.12591	4.24e-13	1.49e-11	UP	NA	NA	NA	NA	NA	NA	NA	NA	NA	NA	NA
	TRINITY_DN233617_c0_g1	6.20216	4.29e-13	1.51e-11	UP	NA	NA	NA	NA	NA	NA	NA	NA	NA	NA	NA
	TRINITY_DN27228_c0_g1	4.09613	4.3e-13	1.51e-11	UP	TRINITY_DN27228_c0_g1	TraesCS6B01G450000.1	1	113	879	1.27e-51	TraesCS6B01G450000	chr6B	708988737	708990296	Aquaporin
	TRINITY_DN149828_c0_g1	9.65543	4.33e-13	1.52e-11	UP	TRINITY_DN149828_c0_g1	TraesCS3D01G342300.1	1	213	213	1.82e-55	TraesCS3D01G342300	chr3D	455014922	455015134	AP2/B3-like transcriptional factor family protein
	TRINITY_DN24290_c0_g1	9.46241	4.34e-13	1.52e-11	UP	TRINITY_DN24290_c0_g1	TraesCS7D01G517100.1	1399	1581	1581	7.83e-68	TraesCS7D01G517100	chr7D	616219269	616221560	F-box family protein
	TRINITY_DN101427_c0_g1	10.4267	4.37e-13	1.53e-11	UP	TRINITY_DN101427_c0_g1	TraesCS6A01G013700.1	2788	2859	2859	4.26e-28	TraesCS6A01G013700	chr6A	6727602	6735225	Ubiquitin family protein
	TRINITY_DN74550_c0_g1	9.56595	4.38e-13	1.53e-11	UP	TRINITY_DN74550_c0_g1	TraesCS5B01G008700.1	1	94	414	8.71e-43	TraesCS5B01G008700	chr5B	9243595	9244008	VQ motif-containing protein
	TRINITY_DN25730_c0_g1	5.80786	4.4e-13	1.54e-11	UP	NA	NA	NA	NA	NA	NA	NA	NA	NA	NA	NA
	TRINITY_DN17973_c0_g1	9.47169	4.43e-13	1.55e-11	UP	NA	NA	NA	NA	NA	NA	NA	NA	NA	NA	NA
	TRINITY_DN16091_c0_g2	9.96347	4.47e-13	1.56e-11	UP	NA	NA	NA	NA	NA	NA	NA	NA	NA	NA	NA
	TRINITY_DN28864_c0_g1	9.58993	4.49e-13	1.57e-11	UP	TRINITY_DN28864_c0_g1	TraesCS7A01G152800.1	444	530	549	6.99e-39	TraesCS7A01G152800	chr7A	106199368	106202064	Arginine/serine-rich splicing factor, putative
	TRINITY_DN31098_c0_g1	9.52925	4.59e-13	1.6e-11	UP	TRINITY_DN31098_c0_g1	TraesCS2A01G112500.1	330	388	537	2.4e-23	TraesCS2A01G112500	chr2A	63606250	63607316	Universal stress protein
	TRINITY_DN25587_c0_g1	6.50611	4.59e-13	1.6e-11	UP	TRINITY_DN25587_c0_g1	TraesCS5B01G097600.1	245	303	510	2.56e-23	TraesCS5B01G097600	chr5B	128854525	128855822	Universal stress protein
	TRINITY_DN33256_c0_g1	4.79747	4.61e-13	1.61e-11	UP	NA	NA	NA	NA	NA	NA	NA	NA	NA	NA	NA
	TRINITY_DN21637_c0_g2	4.09604	4.69e-13	1.63e-11	UP	TRINITY_DN21637_c0_g2	TraesCS1B01G294300.1	1794	1563	1947	1.95e-114	TraesCS1B01G294300	chr1B	512172902	512175830	70 kDa heat shock protein
	TRINITY_DN21408_c0_g1	9.76897	4.73e-13	1.65e-11	UP	NA	NA	NA	NA	NA	NA	NA	NA	NA	NA	NA
	TRINITY_DN32486_c0_g1	9.45359	4.82e-13	1.67e-11	UP	NA	NA	NA	NA	NA	NA	NA	NA	NA	NA	NA
	TRINITY_DN86047_c4_g1	9.68564	4.9e-13	1.7e-11	UP	TRINITY_DN86047_c4_g1	TraesCS2D01G000200.1	925	954	954	3.89e-07	TraesCS2D01G000200	chr2D	39675	40812	Reductase 1
	TRINITY_DN47680_c0_g1	10.1333	4.9e-13	1.7e-11	UP	NA	NA	NA	NA	NA	NA	NA	NA	NA	NA	NA
	TRINITY_DN39770_c2_g1	9.77599	4.94e-13	1.71e-11	UP	NA	NA	NA	NA	NA	NA	NA	NA	NA	NA	NA
	TRINITY_DN33793_c1_g1	10.6408	4.94e-13	1.71e-11	UP	TRINITY_DN33793_c1_g1	TraesCS4A01G411000.1	1012	1071	1605	8.92e-24	TraesCS4A01G411000	chr4A	683778834	683782280	Pheophorbide a oxygenase, chloroplastic
	TRINITY_DN50238_c0_g1	11.0976	5.03e-13	1.74e-11	UP	NA	NA	NA	NA	NA	NA	NA	NA	NA	NA	NA
	TRINITY_DN15136_c0_g3	3.1978	5.05e-13	1.75e-11	UP	TRINITY_DN15136_c0_g3	TraesCS2A01G152000.1	147	174	174	9.09e-06	TraesCS2A01G152000	chr2A	100129408	100129674	Low temperature and salt responsive protein
	TRINITY_DN25057_c0_g1	10.6052	5.06e-13	1.75e-11	UP	NA	NA	NA	NA	NA	NA	NA	NA	NA	NA	NA
	TRINITY_DN20062_c0_g1	5.67787	5.07e-13	1.75e-11	UP	NA	NA	NA	NA	NA	NA	NA	NA	NA	NA	NA
	TRINITY_DN31139_c0_g1	8.13741	5.08e-13	1.76e-11	UP	TRINITY_DN31139_c0_g1	TraesCS7A01G284500.1	2309	2391	3162	3.12e-34	TraesCS7A01G284500	chr7A	323432678	323479128	Exocyst complex component Sec8-like
	TRINITY_DN65770_c0_g1	9.64829	5.17e-13	1.79e-11	UP	TRINITY_DN65770_c0_g1	TraesCS4A01G321300.1	1577	1634	1710	1.22e-22	TraesCS4A01G321300	chr4A	609804687	609807321	Poly [ADP-ribose] polymerase
	TRINITY_DN69916_c0_g1	9.92223	5.22e-13	1.8e-11	UP	NA	NA	NA	NA	NA	NA	NA	NA	NA	NA	NA
	TRINITY_DN26414_c0_g2	5.09291	5.23e-13	1.8e-11	UP	NA	NA	NA	NA	NA	NA	NA	NA	NA	NA	NA
	TRINITY_DN20618_c0_g1	12.361	5.23e-13	1.8e-11	UP	NA	NA	NA	NA	NA	NA	NA	NA	NA	NA	NA
	TRINITY_DN85804_c0_g1	9.98186	5.27e-13	1.82e-11	UP	TRINITY_DN85804_c0_g1	TraesCS5A01G025200.1	501	557	888	1.38e-20	TraesCS5A01G025200	chr5A	19666477	19668898	2-aminoethanethiol dioxygenase
	TRINITY_DN102180_c0_g1	9.54846	5.27e-13	1.82e-11	UP	NA	NA	NA	NA	NA	NA	NA	NA	NA	NA	NA
	TRINITY_DN12541_c0_g1	5.54454	5.27e-13	1.82e-11	UP	TRINITY_DN12541_c0_g1	TraesCS1A01G021100.1	61	1346	1380	0	TraesCS1A01G021100	chr1A	10150917	10152296	Anthocyanin 5-aromatic acyltransferase
	TRINITY_DN247058_c0_g1	3.54328	5.27e-13	1.82e-11	UP	TRINITY_DN247058_c0_g1	TraesCS6A01G409800.1	1477	1257	2163	2.25e-113	TraesCS6A01G409800	chr6A	613482341	613488176	ABC transporter ATP-binding protein ARB1
	TRINITY_DN48280_c1_g1	9.55668	5.28e-13	1.82e-11	UP	TRINITY_DN48280_c1_g1	TraesCS5A01G337900.1	1196	1305	1305	1.56e-51	TraesCS5A01G337900	chr5A	546154217	546155521	Agmatine coumaroyltransferase-2
	TRINITY_DN865_c0_g3	8.09486	5.29e-13	1.82e-11	UP	TRINITY_DN865_c0_g3	TraesCS3B01G369700.1	388	466	1929	8.44e-32	TraesCS3B01G369700	chr3B	581702512	581710090	Type I inositol-1,4,5-trisphosphate 5-phosphatase CVP2
	TRINITY_DN5981_c0_g2	3.4932	5.29e-13	1.82e-11	UP	NA	NA	NA	NA	NA	NA	NA	NA	NA	NA	NA
	TRINITY_DN6091_c0_g1	4.1365	5.29e-13	1.82e-11	UP	NA	NA	NA	NA	NA	NA	NA	NA	NA	NA	NA
	TRINITY_DN21223_c1_g1	7.5343	5.37e-13	1.84e-11	UP	NA	NA	NA	NA	NA	NA	NA	NA	NA	NA	NA
	TRINITY_DN200987_c0_g1	9.44471	5.39e-13	1.85e-11	UP	NA	NA	NA	NA	NA	NA	NA	NA	NA	NA	NA
	TRINITY_DN46974_c0_g3	9.44471	5.39e-13	1.85e-11	UP	NA	NA	NA	NA	NA	NA	NA	NA	NA	NA	NA
	TRINITY_DN60139_c0_g1	9.44471	5.39e-13	1.85e-11	UP	NA	NA	NA	NA	NA	NA	NA	NA	NA	NA	NA
	TRINITY_DN72167_c0_g2	9.8675	5.4e-13	1.85e-11	UP	NA	NA	NA	NA	NA	NA	NA	NA	NA	NA	NA
	TRINITY_DN19649_c1_g2	7.32719	5.4e-13	1.85e-11	UP	TRINITY_DN19649_c1_g2	TraesCS3D01G030600.1	2043	1920	2043	1.23e-41	TraesCS3D01G030600	chr3D	11333513	11355705	Kinase family protein
	TRINITY_DN20973_c0_g3	9.58105	5.43e-13	1.86e-11	UP	NA	NA	NA	NA	NA	NA	NA	NA	NA	NA	NA
	TRINITY_DN313_c0_g1	6.42691	5.46e-13	1.87e-11	UP	TRINITY_DN313_c0_g1	TraesCS5D01G266000.1	220	744	744	0	TraesCS5D01G266000	chr5D	370310980	370311837	Heat shock protein, putative
	TRINITY_DN31096_c0_g1	3.05782	5.46e-13	1.87e-11	UP	TRINITY_DN31096_c0_g1	TraesCS6A01G087800.1	21	117	516	1.33e-32	TraesCS6A01G087800	chr6A	55892278	55893250	Polyubiquitin protein
	TRINITY_DN45522_c0_g3	9.55777	5.47e-13	1.87e-11	UP	NA	NA	NA	NA	NA	NA	NA	NA	NA	NA	NA
	TRINITY_DN29958_c0_g1	3.64704	5.48e-13	1.88e-11	UP	TRINITY_DN29958_c0_g1	TraesCS5B01G566400.1	1	543	543	0	TraesCS5B01G566400	chr5B	710651020	710651562	AWPM-19-like membrane family protein
	TRINITY_DN161959_c0_g1	10.339	5.48e-13	1.88e-11	UP	NA	NA	NA	NA	NA	NA	NA	NA	NA	NA	NA
	TRINITY_DN19623_c0_g3	4.25025	5.51e-13	1.88e-11	UP	TRINITY_DN19623_c0_g3	TraesCS2D01G454500.1	213	291	291	2.73e-32	TraesCS2D01G454500	chr2D	562845366	562845656	senescence-associated family protein (DUF581)
	TRINITY_DN36730_c0_g1	9.44996	5.57e-13	1.9e-11	UP	NA	NA	NA	NA	NA	NA	NA	NA	NA	NA	NA
	TRINITY_DN14769_c2_g1	5.03888	5.58e-13	1.91e-11	UP	TRINITY_DN14769_c2_g1	TraesCS4D01G276500.1	313	1	1026	2.31e-160	TraesCS4D01G276500	chr4D	447639020	447641302	Heat shock transcription factor
	TRINITY_DN69675_c4_g1	3.26854	5.66e-13	1.93e-11	UP	NA	NA	NA	NA	NA	NA	NA	NA	NA	NA	NA
	TRINITY_DN124648_c0_g1	9.58189	5.67e-13	1.93e-11	UP	NA	NA	NA	NA	NA	NA	NA	NA	NA	NA	NA
	TRINITY_DN11390_c0_g1	5.82151	5.81e-13	1.98e-11	UP	TRINITY_DN11390_c0_g1	TraesCS4B01G211900.1	941	1019	1146	1.78e-32	TraesCS4B01G211900	chr4B	450449369	450454773	SH3 domain-containing protein 1
	TRINITY_DN28730_c0_g1	6.39193	5.86e-13	2e-11	UP	TRINITY_DN28730_c0_g1	TraesCS5B01G495500.1	530	604	1146	4.41e-32	TraesCS5B01G495500	chr5B	662976884	662980348	Hsp70 nucleotide exchange factor fes1
	TRINITY_DN11162_c2_g1	4.4038	5.98e-13	2.04e-11	UP	NA	NA	NA	NA	NA	NA	NA	NA	NA	NA	NA
	TRINITY_DN643_c1_g1	11.3991	6e-13	2.04e-11	UP	NA	NA	NA	NA	NA	NA	NA	NA	NA	NA	NA
	TRINITY_DN11175_c0_g1	3.81346	6.02e-13	2.05e-11	UP	TRINITY_DN11175_c0_g1	TraesCS2B01G396700.2	757	831	888	6.14e-30	TraesCS2B01G396700	chr2B	563043854	563046441	Aquaporin
	TRINITY_DN31846_c0_g1	3.40056	6.03e-13	2.05e-11	UP	TRINITY_DN31846_c0_g1	TraesCS3D01G073000.1	115	179	762	1.32e-26	TraesCS3D01G073000	chr3D	33159459	33162518	Triosephosphate isomerase
	TRINITY_DN35675_c0_g2	9.7937	6.07e-13	2.06e-11	UP	TRINITY_DN35675_c0_g2	TraesCS2B01G626700.1	489	968	1638	0	TraesCS2B01G626700	chr2B	798743094	798746067	Protein NRT1/ PTR FAMILY 5.5
	TRINITY_DN52361_c0_g4	9.61738	6.08e-13	2.07e-11	UP	NA	NA	NA	NA	NA	NA	NA	NA	NA	NA	NA
	TRINITY_DN59581_c0_g1	10.0548	6.09e-13	2.07e-11	UP	NA	NA	NA	NA	NA	NA	NA	NA	NA	NA	NA
	TRINITY_DN9601_c0_g1	4.51226	6.13e-13	2.08e-11	UP	TRINITY_DN9601_c0_g1	TraesCS6B01G292100.1	353	1416	1416	0	TraesCS6B01G292100	chr6B	525555005	525556603	F-box family protein
	TRINITY_DN39996_c0_g1	9.72974	6.13e-13	2.08e-11	UP	TRINITY_DN39996_c0_g1	TraesCS6D01G046700.1	1022	1203	1203	1.16e-71	TraesCS6D01G046700	chr6D	20851603	20853694	Ulp1 protease family, C-terminal catalytic domain containing protein, expressed
	TRINITY_DN11830_c0_g2	6.31414	6.31e-13	2.14e-11	UP	NA	NA	NA	NA	NA	NA	NA	NA	NA	NA	NA
	TRINITY_DN18705_c0_g4	10.6366	6.32e-13	2.14e-11	UP	NA	NA	NA	NA	NA	NA	NA	NA	NA	NA	NA
	TRINITY_DN3561_c1_g1	10.756	6.37e-13	2.16e-11	UP	NA	NA	NA	NA	NA	NA	NA	NA	NA	NA	NA
	TRINITY_DN79306_c0_g2	9.73696	6.39e-13	2.16e-11	UP	NA	NA	NA	NA	NA	NA	NA	NA	NA	NA	NA
	TRINITY_DN27673_c1_g2	9.93235	6.52e-13	2.2e-11	UP	NA	NA	NA	NA	NA	NA	NA	NA	NA	NA	NA
	TRINITY_DN34401_c0_g2	6.55289	6.53e-13	2.2e-11	UP	TRINITY_DN34401_c0_g2	TraesCS6A01G013700.1	2788	2845	2859	1.48e-22	TraesCS6A01G013700	chr6A	6727602	6735225	Ubiquitin family protein
	TRINITY_DN2348_c0_g2	3.28432	6.56e-13	2.21e-11	UP	NA	NA	NA	NA	NA	NA	NA	NA	NA	NA	NA
	TRINITY_DN187438_c0_g1	9.42256	6.59e-13	2.22e-11	UP	NA	NA	NA	NA	NA	NA	NA	NA	NA	NA	NA
	TRINITY_DN58791_c0_g3	9.42256	6.59e-13	2.22e-11	UP	TRINITY_DN58791_c0_g3	TraesCS7A01G159600.1	1	90	717	1.69e-40	TraesCS7A01G159600	chr7A	115903779	115904909	Chaperone protein dnaJ
	TRINITY_DN7888_c3_g1	10.5937	6.6e-13	2.22e-11	UP	NA	NA	NA	NA	NA	NA	NA	NA	NA	NA	NA
	TRINITY_DN14736_c0_g1	9.8935	6.61e-13	2.22e-11	UP	TRINITY_DN14736_c0_g1	TraesCS7A01G134000.1	1	120	774	1.66e-55	TraesCS7A01G134000	chr7A	85901499	85903086	Calcium-binding EF-hand
	TRINITY_DN4927_c0_g1	3.52503	6.73e-13	2.26e-11	UP	TRINITY_DN4927_c0_g1	TraesCS7D01G354100.1	1	516	516	0	TraesCS7D01G354100	chr7D	458010924	458013087	Hemoglobin-like protein
	TRINITY_DN2152_c0_g1	4.28468	6.79e-13	2.28e-11	UP	TRINITY_DN2152_c0_g1	TraesCS1B01G043200.1	2407	3225	3225	0	TraesCS1B01G043200	chr1B	22701035	22707821	Glucan 1,3-beta-glucosidase
	TRINITY_DN43997_c0_g1	5.53628	6.84e-13	2.3e-11	UP	NA	NA	NA	NA	NA	NA	NA	NA	NA	NA	NA
	TRINITY_DN51189_c0_g1	7.39595	6.91e-13	2.32e-11	UP	NA	NA	NA	NA	NA	NA	NA	NA	NA	NA	NA
	TRINITY_DN64140_c0_g1	5.03639	6.95e-13	2.33e-11	UP	TRINITY_DN64140_c0_g1	TraesCS1A01G310500.1	450	500	1539	9.31e-19	TraesCS1A01G310500	chr1A	501026475	501031120	Cytochrome P450
	TRINITY_DN73795_c0_g1	6.75296	6.98e-13	2.34e-11	UP	NA	NA	NA	NA	NA	NA	NA	NA	NA	NA	NA
	TRINITY_DN18388_c0_g1	9.43103	7.01e-13	2.35e-11	UP	TRINITY_DN18388_c0_g1	TraesCS6B01G066700.1	2483	2569	2592	8.38e-39	TraesCS6B01G066700	chr6B	44651247	44670485	Nuclear cap-binding protein subunit 1
	TRINITY_DN85951_c0_g1	9.43103	7.01e-13	2.35e-11	UP	NA	NA	NA	NA	NA	NA	NA	NA	NA	NA	NA
	TRINITY_DN6774_c0_g2	11.0021	7.12e-13	2.39e-11	UP	TRINITY_DN6774_c0_g2	TraesCS7D01G293800.1	648	722	921	1.85e-19	TraesCS7D01G293800	chr7D	364630891	364632896	65-kDa microtubule-associated-like protein
	TRINITY_DN1808_c0_g2	2.96874	7.14e-13	2.39e-11	UP	TRINITY_DN1808_c0_g2	TraesCS5A01G267500.1	1	860	948	0	TraesCS5A01G267500	chr5A	478856993	478857940	Splicing factor U2af small subunit A
	TRINITY_DN154403_c0_g1	6.99738	7.28e-13	2.44e-11	UP	NA	NA	NA	NA	NA	NA	NA	NA	NA	NA	NA
	TRINITY_DN52265_c3_g1	9.4614	7.29e-13	2.44e-11	UP	NA	NA	NA	NA	NA	NA	NA	NA	NA	NA	NA
	TRINITY_DN27600_c0_g1	4.23117	7.4e-13	2.48e-11	UP	TRINITY_DN27600_c0_g1	TraesCS3A01G294500.1	496	626	660	1.07e-59	TraesCS3A01G294500	chr3A	528528844	528531755	Calcyclin-binding protein
	TRINITY_DN11410_c0_g1	7.49182	7.42e-13	2.48e-11	UP	NA	NA	NA	NA	NA	NA	NA	NA	NA	NA	NA
	TRINITY_DN16948_c1_g1	9.72639	7.53e-13	2.51e-11	UP	NA	NA	NA	NA	NA	NA	NA	NA	NA	NA	NA
	TRINITY_DN28505_c0_g1	7.6092	7.53e-13	2.51e-11	UP	NA	NA	NA	NA	NA	NA	NA	NA	NA	NA	NA
	TRINITY_DN1127_c0_g2	3.89489	7.66e-13	2.56e-11	UP	TRINITY_DN1127_c0_g2	TraesCS3A01G232100.1	1	1275	1485	0	TraesCS3A01G232100	chr3A	433551131	433556520	Zinc finger protein ZPR1
	TRINITY_DN63587_c0_g1	4.45334	7.66e-13	2.56e-11	UP	NA	NA	NA	NA	NA	NA	NA	NA	NA	NA	NA
	TRINITY_DN6331_c0_g1	5.27556	7.72e-13	2.57e-11	UP	TRINITY_DN6331_c0_g1	TraesCS3B01G247200.1	341	576	576	2.06e-117	TraesCS3B01G247200	chr3B	393227665	393229669	Chaperone protein DnaJ
	TRINITY_DN27718_c0_g1	3.51052	7.76e-13	2.59e-11	UP	TRINITY_DN27718_c0_g1	TraesCS3D01G384100.2	1	52	1101	3.09e-17	TraesCS3D01G384100	chr3D	499843858	499846146	Fructose-bisphosphate aldolase
	TRINITY_DN71277_c0_g2	9.58519	7.86e-13	2.62e-11	UP	NA	NA	NA	NA	NA	NA	NA	NA	NA	NA	NA
	TRINITY_DN2552_c1_g2	9.69684	7.91e-13	2.63e-11	UP	TRINITY_DN2552_c1_g2	TraesCS4A01G446600.1	3188	3753	3753	0	TraesCS4A01G446600	chr4A	714099723	714103581	Receptor-like protein kinase
	TRINITY_DN36104_c0_g1	9.69684	7.91e-13	2.63e-11	UP	TRINITY_DN36104_c0_g1	TraesCS7B01G254000.2	2	55	672	1.79e-20	TraesCS7B01G254000	chr7B	468122683	468124775	GTP-binding nuclear protein
	TRINITY_DN116864_c0_g1	9.77949	7.92e-13	2.63e-11	UP	NA	NA	NA	NA	NA	NA	NA	NA	NA	NA	NA
	TRINITY_DN16104_c0_g3	10.1294	7.97e-13	2.65e-11	UP	TRINITY_DN16104_c0_g3	TraesCS7A01G464600.1	1948	2157	3228	3.03e-47	TraesCS7A01G464600	chr7A	661164633	661169090	Disease resistance protein (NBS-LRR class) family
	TRINITY_DN52265_c5_g1	4.84866	8.14e-13	2.7e-11	UP	TRINITY_DN52265_c5_g1	TraesCS1B01G082900.1	310	462	462	3.82e-56	TraesCS1B01G082900	chr1B	66928225	66929399	Ankyrin repeat-containing protein
	TRINITY_DN71615_c0_g1	6.16356	8.16e-13	2.71e-11	UP	NA	NA	NA	NA	NA	NA	NA	NA	NA	NA	NA
	TRINITY_DN288_c2_g1	4.12862	8.24e-13	2.74e-11	UP	NA	NA	NA	NA	NA	NA	NA	NA	NA	NA	NA
	TRINITY_DN38380_c0_g1	12.7905	8.44e-13	2.8e-11	UP	NA	NA	NA	NA	NA	NA	NA	NA	NA	NA	NA
	TRINITY_DN11133_c0_g1	3.14499	8.76e-13	2.9e-11	UP	TRINITY_DN11133_c0_g1	TraesCS1B01G422400.1	1443	1587	1587	5.95e-71	TraesCS1B01G422400	chr1B	645511135	645514305	Structural constituent of cell wall
	TRINITY_DN3408_c1_g1	5.63414	8.78e-13	2.9e-11	UP	TRINITY_DN3408_c1_g1	TraesCS4A01G119400.1	187	502	510	5.85e-156	TraesCS4A01G119400	chr4A	147445223	147445980	Universal stress protein family protein, expressed
	TRINITY_DN2534_c0_g2	8.7221	8.93e-13	2.95e-11	UP	NA	NA	NA	NA	NA	NA	NA	NA	NA	NA	NA
	TRINITY_DN23498_c0_g1	9.55352	9.16e-13	3.02e-11	UP	NA	NA	NA	NA	NA	NA	NA	NA	NA	NA	NA
	TRINITY_DN71548_c0_g1	9.80749	9.22e-13	3.04e-11	UP	NA	NA	NA	NA	NA	NA	NA	NA	NA	NA	NA
	TRINITY_DN15866_c1_g1	4.83585	9.29e-13	3.07e-11	UP	TRINITY_DN15866_c1_g1	TraesCS2B01G231700.1	1	2175	2178	0	TraesCS2B01G231700	chr2B	228758409	228761458	Protein kinase family protein
	TRINITY_DN5477_c1_g1	3.79763	9.35e-13	3.08e-11	UP	TRINITY_DN5477_c1_g1	TraesCS1B01G451900.1	530	900	900	0	TraesCS1B01G451900	chr1B	669022511	669023410	Plant basic secretory protein family protein, putative
	TRINITY_DN60379_c1_g1	10.1156	9.4e-13	3.1e-11	UP	TRINITY_DN60379_c1_g1	TraesCS1A01G365100.1	2091	2338	2427	2.51e-128	TraesCS1A01G365100	chr1A	544465497	544475087	Phospholipase D
	TRINITY_DN14219_c0_g3	7.25024	9.49e-13	3.12e-11	UP	NA	NA	NA	NA	NA	NA	NA	NA	NA	NA	NA
	TRINITY_DN11505_c0_g2	5.35761	9.51e-13	3.13e-11	UP	NA	NA	NA	NA	NA	NA	NA	NA	NA	NA	NA
	TRINITY_DN78553_c0_g1	12.0091	9.52e-13	3.13e-11	UP	TRINITY_DN78553_c0_g1	TraesCS4A01G162600.1	1	144	318	2.76e-63	TraesCS4A01G162600	chr4A	358840185	358840615	DNA-directed RNA polymerase subunit beta
	TRINITY_DN15881_c1_g1	9.65582	9.59e-13	3.15e-11	UP	TRINITY_DN15881_c1_g1	TraesCS7B01G461600.1	174	942	942	0	TraesCS7B01G461600	chr7B	718850191	718851616	receptor kinase 1
	TRINITY_DN11660_c0_g1	9.57774	9.77e-13	3.21e-11	UP	NA	NA	NA	NA	NA	NA	NA	NA	NA	NA	NA
	TRINITY_DN13481_c0_g4	6.61966	9.87e-13	3.24e-11	UP	TRINITY_DN13481_c0_g4	TraesCS5D01G320800.1	239	1	597	3.2e-123	TraesCS5D01G320800	chr5D	412960326	412961366	Ethylene-responsive transcription factor
	TRINITY_DN20812_c0_g1	9.58971	9.88e-13	3.24e-11	UP	TRINITY_DN20812_c0_g1	TraesCS7D01G208500.1	681	543	1485	1.65e-45	TraesCS7D01G208500	chr7D	166512784	166514482	3-ketoacyl-CoA synthase
	TRINITY_DN17181_c0_g1	4.74612	9.96e-13	3.27e-11	UP	TRINITY_DN17181_c0_g1	TraesCS5D01G442100.1	402	459	459	2.25e-22	TraesCS5D01G442100	chr5D	494235377	494236722	30S ribosomal protein S13
	TRINITY_DN43124_c0_g1	6.14848	1e-12	3.29e-11	UP	NA	NA	NA	NA	NA	NA	NA	NA	NA	NA	NA
	TRINITY_DN179147_c0_g1	9.49844	1.02e-12	3.34e-11	UP	NA	NA	NA	NA	NA	NA	NA	NA	NA	NA	NA
	TRINITY_DN111_c0_g1	3.98067	1.07e-12	3.48e-11	UP	TRINITY_DN111_c0_g1	TraesCS1A01G133100.1	788	2022	2022	0	TraesCS1A01G133100	chr1A	185141618	185146174	Chaperone DnaK
	TRINITY_DN115112_c0_g1	9.3772	1.07e-12	3.48e-11	UP	TRINITY_DN115112_c0_g1	TraesCS6A01G000400.1	493	552	1161	6.71e-24	TraesCS6A01G000400	chr6A	288242	290831	D-glycerate dehydrogenase/hydroxypyruvate reductase
	TRINITY_DN78887_c0_g1	9.87457	1.07e-12	3.49e-11	UP	NA	NA	NA	NA	NA	NA	NA	NA	NA	NA	NA
	TRINITY_DN2458_c0_g1	4.35315	1.07e-12	3.5e-11	UP	TRINITY_DN2458_c0_g1	TraesCS3A01G182400.1	1	258	258	3.94e-133	TraesCS3A01G182400	chr3A	211953807	211954515	tRNA (uracil-O(2)-)-methyltransferase
	TRINITY_DN72613_c0_g1	9.66316	1.08e-12	3.51e-11	UP	TRINITY_DN72613_c0_g1	TraesCS2B01G021800.1	1449	1884	1884	4.03e-157	TraesCS2B01G021800	chr2B	10586205	10592980	Receptor-like protein kinase
	TRINITY_DN124063_c0_g1	9.44625	1.08e-12	3.52e-11	UP	NA	NA	NA	NA	NA	NA	NA	NA	NA	NA	NA
	TRINITY_DN27284_c0_g1	9.44625	1.08e-12	3.52e-11	UP	NA	NA	NA	NA	NA	NA	NA	NA	NA	NA	NA
	TRINITY_DN57768_c0_g1	9.54048	1.08e-12	3.53e-11	UP	NA	NA	NA	NA	NA	NA	NA	NA	NA	NA	NA
	TRINITY_DN1313_c1_g1	3.4994	1.09e-12	3.56e-11	UP	TRINITY_DN1313_c1_g1	TraesCS4D01G268000.1	1224	1017	1281	3.58e-106	TraesCS4D01G268000	chr4D	439291770	439293378	Heavy metal-associated protein
	TRINITY_DN92713_c0_g1	11.4376	1.1e-12	3.59e-11	UP	NA	NA	NA	NA	NA	NA	NA	NA	NA	NA	NA
	TRINITY_DN5142_c0_g4	10.1993	1.12e-12	3.64e-11	UP	TRINITY_DN5142_c0_g4	TraesCS7A01G021700.1	1	300	3324	6.22e-157	TraesCS7A01G021700	chr7A	8775286	8780950	Disease resistance protein (NBS-LRR class) family
	TRINITY_DN21057_c0_g1	5.75296	1.13e-12	3.66e-11	UP	NA	NA	NA	NA	NA	NA	NA	NA	NA	NA	NA
	TRINITY_DN63934_c0_g1	4.15635	1.16e-12	3.77e-11	UP	TRINITY_DN63934_c0_g1	TraesCS2A01G437500.1	1	36	333	1.15e-09	TraesCS2A01G437500	chr2A	689199094	689201548	V-type proton ATPase subunit G
	TRINITY_DN21868_c1_g1	3.09447	1.17e-12	3.81e-11	UP	TRINITY_DN21868_c1_g1	TraesCS7A01G453300.1	214	464	915	5.76e-105	TraesCS7A01G453300	chr7A	647305836	647307613	Polyubiquitin protein
	TRINITY_DN23401_c0_g1	3.81483	1.18e-12	3.84e-11	UP	TRINITY_DN23401_c0_g1	TraesCS2D01G239300.2	8	840	840	0	TraesCS2D01G239300	chr2D	252141813	252145187	RanBP2-type zinc finger protein
	TRINITY_DN91049_c0_g1	10.5758	1.19e-12	3.86e-11	UP	TRINITY_DN91049_c0_g1	TraesCS5B01G163200.1	719	790	897	1.67e-30	TraesCS5B01G163200	chr5B	301201095	301204600	Tyrosine-protein phosphatase
	TRINITY_DN77532_c0_g1	9.36783	1.19e-12	3.87e-11	UP	TRINITY_DN77532_c0_g1	TraesCS5A01G052700.1	1	132	1338	2.95e-62	TraesCS5A01G052700	chr5A	47650111	47652957	Glucan 1,3-beta-glucosidase
	TRINITY_DN28031_c0_g1	3.34619	1.2e-12	3.88e-11	UP	TRINITY_DN28031_c0_g1	TraesCS1B01G329600.1	703	782	933	2.79e-33	TraesCS1B01G329600	chr1B	555638168	555639909	DCD (Development and cell death) domain protein
	TRINITY_DN17035_c0_g3	10.4157	1.2e-12	3.9e-11	UP	NA	NA	NA	NA	NA	NA	NA	NA	NA	NA	NA
	TRINITY_DN8453_c2_g1	4.94883	1.21e-12	3.91e-11	UP	TRINITY_DN8453_c2_g1	TraesCS1B01G368400.1	777	909	909	2.26e-64	TraesCS1B01G368400	chr1B	598843666	598844574	Acidic chitinase
	TRINITY_DN59653_c0_g1	4.6514	1.22e-12	3.95e-11	UP	NA	NA	NA	NA	NA	NA	NA	NA	NA	NA	NA
	TRINITY_DN48434_c0_g1	6.24456	1.23e-12	3.98e-11	UP	TRINITY_DN48434_c0_g1	TraesCS7D01G108300.1	1	294	294	8.22e-116	TraesCS7D01G108300	chr7D	64893828	64894121	Clavata3/ESR (CLE) gene family member
	TRINITY_DN56789_c0_g2	9.64816	1.25e-12	4.04e-11	UP	TRINITY_DN56789_c0_g2	TraesCS3A01G009200.1	1961	2461	3081	0	TraesCS3A01G009200	chr3A	8321632	8329985	NBS-LRR-like resistance protein
	TRINITY_DN30107_c0_g2	7.15875	1.26e-12	4.06e-11	UP	TRINITY_DN30107_c0_g2	TraesCS2D01G205300.1	3166	2680	4305	6.89e-113	TraesCS2D01G205300	chr2D	157119913	157124217	Retrovirus-related Pol polyprotein from transposon TNT 1-94
	TRINITY_DN13189_c0_g2	9.70056	1.26e-12	4.06e-11	UP	NA	NA	NA	NA	NA	NA	NA	NA	NA	NA	NA
	TRINITY_DN22036_c0_g1	10.184	1.26e-12	4.08e-11	UP	NA	NA	NA	NA	NA	NA	NA	NA	NA	NA	NA
	TRINITY_DN96442_c0_g1	6.10758	1.27e-12	4.09e-11	UP	NA	NA	NA	NA	NA	NA	NA	NA	NA	NA	NA
	TRINITY_DN4176_c0_g2	6.50353	1.31e-12	4.21e-11	UP	TRINITY_DN4176_c0_g2	TraesCS2D01G271900.2	1	178	1935	1.16e-88	TraesCS2D01G271900	chr2D	335680692	335690932	RNA binding family protein, putative
	TRINITY_DN20123_c0_g3	3.36262	1.31e-12	4.21e-11	UP	TRINITY_DN20123_c0_g3	TraesCS5B01G294400.1	1191	1572	1572	0	TraesCS5B01G294400	chr5B	478741104	478746314	Beta-glucosidase
	TRINITY_DN2491_c0_g3	5.88616	1.32e-12	4.25e-11	UP	TRINITY_DN2491_c0_g3	TraesCS2A01G345600.2	488	542	576	2.22e-18	TraesCS2A01G345600	chr2A	584047719	584052488	sugar transporter, putative (DUF1195)
	TRINITY_DN69080_c0_g1	9.49946	1.33e-12	4.26e-11	UP	NA	NA	NA	NA	NA	NA	NA	NA	NA	NA	NA
	TRINITY_DN102978_c0_g1	6.24763	1.33e-12	4.28e-11	UP	NA	NA	NA	NA	NA	NA	NA	NA	NA	NA	NA
	TRINITY_DN19240_c4_g1	10.6372	1.34e-12	4.31e-11	UP	NA	NA	NA	NA	NA	NA	NA	NA	NA	NA	NA
	TRINITY_DN16210_c0_g1	7.21972	1.34e-12	4.31e-11	UP	NA	NA	NA	NA	NA	NA	NA	NA	NA	NA	NA
	TRINITY_DN111_c2_g1	5.06351	1.36e-12	4.37e-11	UP	TRINITY_DN111_c2_g1	TraesCS6A01G115400.1	351	589	903	2.42e-123	TraesCS6A01G115400	chr6A	85261630	85262743	Calcium-dependent lipid-binding (CaLB domain) family
	TRINITY_DN74779_c0_g2	9.61305	1.37e-12	4.4e-11	UP	NA	NA	NA	NA	NA	NA	NA	NA	NA	NA	NA
	TRINITY_DN31883_c0_g1	2.83431	1.38e-12	4.41e-11	UP	NA	NA	NA	NA	NA	NA	NA	NA	NA	NA	NA
	TRINITY_DN19915_c0_g1	6.28561	1.4e-12	4.47e-11	UP	TRINITY_DN19915_c0_g1	TraesCS4B01G216600.1	3411	3555	3561	1.71e-70	TraesCS4B01G216600	chr4B	456382345	456396153	Replication factor C large subunit
	TRINITY_DN20519_c0_g1	3.93014	1.43e-12	4.56e-11	UP	NA	NA	NA	NA	NA	NA	NA	NA	NA	NA	NA
	TRINITY_DN92209_c1_g1	9.39462	1.43e-12	4.58e-11	UP	TRINITY_DN92209_c1_g1	TraesCS6B01G266100.1	267	327	687	2.19e-24	TraesCS6B01G266100	chr6B	478475285	478480077	Vesicle-associated protein 1-1
	TRINITY_DN50172_c0_g1	9.72252	1.44e-12	4.59e-11	UP	NA	NA	NA	NA	NA	NA	NA	NA	NA	NA	NA
	TRINITY_DN14902_c0_g1	11.2284	1.45e-12	4.62e-11	UP	TRINITY_DN14902_c0_g1	TraesCS7D01G346100.1	7	260	1467	1.19e-131	TraesCS7D01G346100	chr7D	445117544	445121851	Alpha/beta hydrolase, putative
	TRINITY_DN77414_c0_g1	6.40976	1.45e-12	4.63e-11	UP	NA	NA	NA	NA	NA	NA	NA	NA	NA	NA	NA
	TRINITY_DN14887_c0_g3	9.36403	1.46e-12	4.66e-11	UP	TRINITY_DN14887_c0_g3	TraesCS1A01G324900.1	105	176	861	1.12e-28	TraesCS1A01G324900	chr1A	515588379	515591366	50S ribosomal protein L9
	TRINITY_DN3106_c1_g2	7.1967	1.47e-12	4.67e-11	UP	NA	NA	NA	NA	NA	NA	NA	NA	NA	NA	NA
	TRINITY_DN208807_c0_g1	10.024	1.47e-12	4.69e-11	UP	NA	NA	NA	NA	NA	NA	NA	NA	NA	NA	NA
	TRINITY_DN37924_c0_g1	7.17349	1.47e-12	4.69e-11	UP	NA	NA	NA	NA	NA	NA	NA	NA	NA	NA	NA
	TRINITY_DN30254_c0_g3	9.91341	1.47e-12	4.7e-11	UP	TRINITY_DN30254_c0_g3	TraesCS4A01G092400.1	188	247	1161	6.56e-24	TraesCS4A01G092400	chr4A	99029732	99035184	SH3 domain-containing protein 1
	TRINITY_DN80176_c0_g1	4.52443	1.48e-12	4.71e-11	UP	TRINITY_DN80176_c0_g1	TraesCS5B01G012300.1	1155	1212	1293	2.22e-22	TraesCS5B01G012300	chr5B	12324602	12328616	Enolase
	TRINITY_DN26145_c1_g1	3.74623	1.5e-12	4.78e-11	UP	NA	NA	NA	NA	NA	NA	NA	NA	NA	NA	NA
	TRINITY_DN142293_c1_g1	10.1028	1.51e-12	4.8e-11	UP	TRINITY_DN142293_c1_g1	TraesCS1D01G409900.1	321	360	558	9.53e-11	TraesCS1D01G409900	chr1D	471606088	471606857	Beta-adaptin-like protein
	TRINITY_DN27216_c0_g1	4.19767	1.52e-12	4.83e-11	UP	TRINITY_DN27216_c0_g1	TraesCS7A01G508200.1	57	1071	1071	0	TraesCS7A01G508200	chr7A	696017695	696018817	Leucine-rich repeat receptor-like protein kinase family protein
	TRINITY_DN3019_c0_g2	4.41826	1.53e-12	4.84e-11	UP	NA	NA	NA	NA	NA	NA	NA	NA	NA	NA	NA
	TRINITY_DN66043_c0_g3	9.99295	1.53e-12	4.84e-11	UP	TRINITY_DN66043_c0_g3	TraesCS3A01G472100.1	1	492	1251	0	TraesCS3A01G472100	chr3A	703303044	703304294	Basic 7S globulin 2
	TRINITY_DN17562_c0_g3	4.05299	1.54e-12	4.88e-11	UP	TRINITY_DN17562_c0_g3	TraesCS6D01G348900.1	397	483	483	1.53e-38	TraesCS6D01G348900	chr6D	446882212	446883092	Serine-rich protein
	TRINITY_DN44822_c0_g1	9.81053	1.57e-12	4.95e-11	UP	TRINITY_DN44822_c0_g1	TraesCS3D01G324800.1	644	896	1296	4.26e-131	TraesCS3D01G324800	chr3D	437732961	437734963	Auxin efflux carrier component
	TRINITY_DN20772_c0_g1	9.84145	1.58e-12	5e-11	UP	TRINITY_DN20772_c0_g1	TraesCS6A01G413700.1	761	982	2028	6.29e-114	TraesCS6A01G413700	chr6A	614645391	614650680	Calcium-dependent lipid-binding (CaLB domain) family protein
	TRINITY_DN51046_c0_g2	9.34445	1.58e-12	5e-11	UP	NA	NA	NA	NA	NA	NA	NA	NA	NA	NA	NA
	TRINITY_DN94964_c0_g1	10.3861	1.59e-12	5.03e-11	UP	NA	NA	NA	NA	NA	NA	NA	NA	NA	NA	NA
	TRINITY_DN134324_c0_g1	7.88211	1.61e-12	5.06e-11	UP	TRINITY_DN134324_c0_g1	TraesCS2A01G371100.1	40	1	918	1.36e-09	TraesCS2A01G371100	chr2A	613688638	613690027	Short chain dehydrogenase/reductase
	TRINITY_DN19022_c0_g1	3.91911	1.63e-12	5.14e-11	UP	TRINITY_DN19022_c0_g1	TraesCS3A01G506400.1	511	816	816	2.69e-155	TraesCS3A01G506400	chr3A	728017424	728018239	Progesterone 5-beta-reductase
	TRINITY_DN7757_c5_g1	9.94714	1.65e-12	5.2e-11	UP	TRINITY_DN7757_c5_g1	TraesCS2A01G484400.1	197	56	498	2.13e-47	TraesCS2A01G484400	chr2A	719548223	719561160	cytochrome P450, family 71, subfamily A, polypeptide 14
	TRINITY_DN25453_c0_g2	10.418	1.66e-12	5.21e-11	UP	NA	NA	NA	NA	NA	NA	NA	NA	NA	NA	NA
	TRINITY_DN18294_c0_g6	9.70444	1.69e-12	5.32e-11	UP	TRINITY_DN18294_c0_g6	TraesCS5D01G519800.1	8	874	2589	4.04e-164	TraesCS5D01G519800	chr5D	540340180	540342768	Serine/threonine-protein kinase
	TRINITY_DN54498_c0_g1	10.0049	1.7e-12	5.33e-11	UP	TRINITY_DN54498_c0_g1	TraesCS6D01G303600.1	406	465	498	6.6e-24	TraesCS6D01G303600	chr6D	412001132	412001968	Universal stress protein family protein
	TRINITY_DN32264_c0_g1	3.11263	1.7e-12	5.34e-11	UP	TRINITY_DN32264_c0_g1	TraesCS5A01G022200.1	1110	1199	1287	1.56e-36	TraesCS5A01G022200	chr5A	17836380	17840367	Cysteine synthase
	TRINITY_DN19649_c1_g1	9.33999	1.71e-12	5.37e-11	UP	NA	NA	NA	NA	NA	NA	NA	NA	NA	NA	NA
	TRINITY_DN9393_c0_g2	3.72944	1.71e-12	5.38e-11	UP	NA	NA	NA	NA	NA	NA	NA	NA	NA	NA	NA
	TRINITY_DN2067_c2_g1	11.2999	1.75e-12	5.48e-11	UP	NA	NA	NA	NA	NA	NA	NA	NA	NA	NA	NA
	TRINITY_DN26327_c0_g2	10.5304	1.75e-12	5.48e-11	UP	NA	NA	NA	NA	NA	NA	NA	NA	NA	NA	NA
	TRINITY_DN40326_c1_g1	6.39177	1.79e-12	5.59e-11	UP	NA	NA	NA	NA	NA	NA	NA	NA	NA	NA	NA
	TRINITY_DN3019_c3_g1	5.93814	1.79e-12	5.6e-11	UP	NA	NA	NA	NA	NA	NA	NA	NA	NA	NA	NA
	TRINITY_DN37966_c0_g1	6.64926	1.8e-12	5.62e-11	UP	NA	NA	NA	NA	NA	NA	NA	NA	NA	NA	NA
	TRINITY_DN10004_c0_g1	3.00005	1.81e-12	5.67e-11	UP	TRINITY_DN10004_c0_g1	TraesCS6B01G418400.1	154	1226	1344	0	TraesCS6B01G418400	chr6B	690558885	690561813	COBRA-like protein
	TRINITY_DN100380_c0_g1	10.8545	1.82e-12	5.7e-11	UP	NA	NA	NA	NA	NA	NA	NA	NA	NA	NA	NA
	TRINITY_DN29785_c2_g1	6.75997	1.84e-12	5.73e-11	UP	NA	NA	NA	NA	NA	NA	NA	NA	NA	NA	NA
	TRINITY_DN11079_c0_g1	4.62049	1.84e-12	5.73e-11	UP	TRINITY_DN11079_c0_g1	TraesCS1B01G043200.1	1519	2292	3225	0	TraesCS1B01G043200	chr1B	22701035	22707821	Glucan 1,3-beta-glucosidase
	TRINITY_DN638_c0_g1	7.29596	1.85e-12	5.76e-11	UP	TRINITY_DN638_c0_g1	TraesCS4B01G059500.2	1	1740	1740	0	TraesCS4B01G059500	chr4B	50729404	50731461	ethylene-dependent gravitropism-deficient and yellow-green-like 2
	TRINITY_DN564_c3_g1	7.53035	1.87e-12	5.82e-11	UP	TRINITY_DN564_c3_g1	TraesCS7D01G531000.1	1086	2138	2274	0	TraesCS7D01G531000	chr7D	625463569	625472005	Coatomer subunit beta'-1
	TRINITY_DN17245_c0_g1	5.51325	1.87e-12	5.82e-11	UP	TRINITY_DN17245_c0_g1	TraesCS5B01G099700.1	1	203	2622	6.13e-98	TraesCS5B01G099700	chr5B	132601117	132604587	Respiratory burst oxidase, putative, expressed
	TRINITY_DN67899_c0_g1	9.35781	1.88e-12	5.87e-11	UP	NA	NA	NA	NA	NA	NA	NA	NA	NA	NA	NA
	TRINITY_DN14746_c0_g1	2.96949	1.88e-12	5.87e-11	UP	TRINITY_DN14746_c0_g1	TraesCS6A01G365900.1	1	245	468	3.82e-93	TraesCS6A01G365900	chr6A	593792311	593792778	Serine-rich protein
	TRINITY_DN17149_c1_g1	10.8122	1.89e-12	5.87e-11	UP	NA	NA	NA	NA	NA	NA	NA	NA	NA	NA	NA
	TRINITY_DN74090_c0_g2	4.57696	1.89e-12	5.88e-11	UP	NA	NA	NA	NA	NA	NA	NA	NA	NA	NA	NA
	TRINITY_DN6119_c0_g1	7.42094	1.91e-12	5.93e-11	UP	NA	NA	NA	NA	NA	NA	NA	NA	NA	NA	NA
	TRINITY_DN75279_c0_g1	9.77631	1.91e-12	5.93e-11	UP	TRINITY_DN75279_c0_g1	TraesCS5A01G546200.1	403	187	1794	2.69e-110	TraesCS5A01G546200	chr5A	700452607	700455124	Protein NRT1/ PTR FAMILY 5.1
	TRINITY_DN66036_c1_g1	9.96561	1.93e-12	6e-11	UP	TRINITY_DN66036_c1_g1	TraesCS5D01G342400.1	1	183	1305	2.77e-87	TraesCS5D01G342400	chr5D	430511648	430512952	Agmatine coumaroyltransferase-2
	TRINITY_DN58581_c0_g3	9.90705	1.94e-12	6.02e-11	UP	NA	NA	NA	NA	NA	NA	NA	NA	NA	NA	NA
	TRINITY_DN368_c1_g3	6.90648	1.95e-12	6.05e-11	UP	TRINITY_DN368_c1_g3	TraesCS3D01G308500.1	3826	3621	4866	7.86e-104	TraesCS3D01G308500	chr3D	422511735	422548778	Brefeldin A-inhibited guanine nucleotide-exchange protein
	TRINITY_DN10917_c1_g1	5.21696	1.95e-12	6.05e-11	UP	TRINITY_DN10917_c1_g1	TraesCS6A01G376200.1	1339	2385	2385	0	TraesCS6A01G376200	chr6A	598154841	598157849	Receptor-like protein kinase
	TRINITY_DN32789_c0_g1	4.91222	1.95e-12	6.05e-11	UP	NA	NA	NA	NA	NA	NA	NA	NA	NA	NA	NA
	TRINITY_DN107117_c2_g1	5.0961	1.95e-12	6.05e-11	UP	NA	NA	NA	NA	NA	NA	NA	NA	NA	NA	NA
	TRINITY_DN18242_c0_g1	9.33101	1.98e-12	6.14e-11	UP	TRINITY_DN18242_c0_g1	TraesCS7A01G046400.1	256	574	900	5.7e-101	TraesCS7A01G046400	chr7A	20982479	20983378	Disease resistance protein
	TRINITY_DN134276_c0_g1	11.7543	2e-12	6.17e-11	UP	NA	NA	NA	NA	NA	NA	NA	NA	NA	NA	NA
	TRINITY_DN159119_c0_g1	9.41078	2e-12	6.18e-11	UP	NA	NA	NA	NA	NA	NA	NA	NA	NA	NA	NA
	TRINITY_DN31101_c0_g1	3.49185	2e-12	6.18e-11	UP	TRINITY_DN31101_c0_g1	TraesCS7A01G012000.1	608	886	1440	7.83e-139	TraesCS7A01G012000	chr7A	5200440	5201879	6-phosphogluconate dehydrogenase, decarboxylating
	TRINITY_DN38126_c0_g1	9.41984	2e-12	6.18e-11	UP	NA	NA	NA	NA	NA	NA	NA	NA	NA	NA	NA
	TRINITY_DN23392_c0_g1	9.39249	2.02e-12	6.24e-11	UP	NA	NA	NA	NA	NA	NA	NA	NA	NA	NA	NA
	TRINITY_DN158033_c0_g1	9.32522	2.03e-12	6.25e-11	UP	NA	NA	NA	NA	NA	NA	NA	NA	NA	NA	NA
	TRINITY_DN57107_c0_g1	9.63274	2.03e-12	6.25e-11	UP	TRINITY_DN57107_c0_g1	TraesCS3B01G000700.1	1	232	1617	1.42e-51	TraesCS3B01G000700	chr3B	981837	986675	1-deoxy-D-xylulose 5-phosphate reductoisomerase
	TRINITY_DN8046_c0_g1	3.46454	2.05e-12	6.32e-11	UP	TRINITY_DN8046_c0_g1	TraesCS6D01G105900.1	1	147	147	3.26e-71	TraesCS6D01G105900	chr6D	69197672	69197818	transmembrane protein
	TRINITY_DN40326_c1_g2	8.05865	2.09e-12	6.43e-11	UP	TRINITY_DN40326_c1_g2	TraesCS3D01G473100.2	151	444	444	1.89e-135	TraesCS3D01G473100	chr3D	574854993	574856618	GPI-anchored adhesin-like protein, putative (DUF3741)
	TRINITY_DN31034_c0_g1	7.32674	2.09e-12	6.43e-11	UP	NA	NA	NA	NA	NA	NA	NA	NA	NA	NA	NA
	TRINITY_DN39667_c0_g2	6.853	2.1e-12	6.46e-11	UP	NA	NA	NA	NA	NA	NA	NA	NA	NA	NA	NA
	TRINITY_DN8284_c0_g1	4.56932	2.13e-12	6.52e-11	UP	TRINITY_DN8284_c0_g1	TraesCS7A01G304700.1	590	724	1209	9.88e-37	TraesCS7A01G304700	chr7A	428915329	428919942	Tyrosine--tRNA ligase
	TRINITY_DN122376_c0_g1	9.56549	2.15e-12	6.58e-11	UP	TRINITY_DN122376_c0_g1	TraesCS5B01G563900.1	1227	1282	1569	1.09e-21	TraesCS5B01G563900	chr5B	709426415	709429855	60 kDa chaperonin
	TRINITY_DN4326_c0_g2	9.79334	2.22e-12	6.79e-11	UP	NA	NA	NA	NA	NA	NA	NA	NA	NA	NA	NA
	TRINITY_DN27384_c1_g2	4.90438	2.24e-12	6.86e-11	UP	NA	NA	NA	NA	NA	NA	NA	NA	NA	NA	NA
	TRINITY_DN21293_c0_g1	6.38198	2.26e-12	6.9e-11	UP	TRINITY_DN21293_c0_g1	TraesCS7B01G460600.1	1238	1540	2064	1.55e-90	TraesCS7B01G460600	chr7B	718082067	718100392	receptor kinase 1
	TRINITY_DN32399_c0_g1	9.34568	2.26e-12	6.9e-11	UP	NA	NA	NA	NA	NA	NA	NA	NA	NA	NA	NA
	TRINITY_DN19865_c0_g1	9.32134	2.28e-12	6.95e-11	UP	TRINITY_DN19865_c0_g1	TraesCS7D01G403600.1	1046	1275	1275	3.36e-118	TraesCS7D01G403600	chr7D	520516473	520520394	Isoprenylcysteine alpha-carbonyl methylesterase ICME protein
	TRINITY_DN11896_c0_g1	4.16898	2.29e-12	7e-11	UP	TRINITY_DN11896_c0_g1	TraesCS2B01G272800.1	2532	1	2532	0	TraesCS2B01G272800	chr2B	374205145	374207676	Receptor-like kinase
	TRINITY_DN42881_c0_g1	10.535	2.3e-12	7.01e-11	UP	TRINITY_DN42881_c0_g1	TraesCS6A01G380400.1	278	369	369	2.56e-26	TraesCS6A01G380400	chr6A	600745082	600745537	DEAD/DEAH box RNA helicase family protein
	TRINITY_DN16157_c0_g1	7.29852	2.3e-12	7.02e-11	UP	TRINITY_DN16157_c0_g1	TraesCS3B01G116900.1	683	857	1932	1.03e-40	TraesCS3B01G116900	chr3B	83881992	83885125	ATP-dependent RNA helicase-like protein
	TRINITY_DN24006_c0_g1	4.87933	2.31e-12	7.03e-11	UP	NA	NA	NA	NA	NA	NA	NA	NA	NA	NA	NA
	TRINITY_DN1173_c0_g1	3.26393	2.31e-12	7.03e-11	UP	TRINITY_DN1173_c0_g1	TraesCS3B01G440600.2	1	613	1146	0	TraesCS3B01G440600	chr3B	680252643	680254869	F-box family protein
	TRINITY_DN64551_c1_g1	5.65113	2.31e-12	7.04e-11	UP	TRINITY_DN64551_c1_g1	TraesCS1D01G371300.1	271	845	966	4.07e-119	TraesCS1D01G371300	chr1D	449648450	449649636	6,7-dimethyl-8-ribityllumazine synthase
	TRINITY_DN35051_c3_g1	10.6139	2.32e-12	7.05e-11	UP	NA	NA	NA	NA	NA	NA	NA	NA	NA	NA	NA
	TRINITY_DN582_c0_g2	5.63045	2.34e-12	7.12e-11	UP	TRINITY_DN582_c0_g2	TraesCS7D01G293800.1	649	746	921	1.96e-34	TraesCS7D01G293800	chr7D	364630891	364632896	65-kDa microtubule-associated-like protein
	TRINITY_DN52265_c0_g2	9.70812	2.34e-12	7.12e-11	UP	NA	NA	NA	NA	NA	NA	NA	NA	NA	NA	NA
	TRINITY_DN75263_c0_g1	9.31095	2.37e-12	7.21e-11	UP	TRINITY_DN75263_c0_g1	TraesCS2B01G487400.1	577	704	2205	3.77e-42	TraesCS2B01G487400	chr2B	683731820	683734978	Photosystem I P700 chlorophyll a apoprotein A2
	TRINITY_DN42561_c0_g1	4.03755	2.39e-12	7.26e-11	UP	NA	NA	NA	NA	NA	NA	NA	NA	NA	NA	NA
	TRINITY_DN24622_c0_g1	9.96983	2.39e-12	7.27e-11	UP	TRINITY_DN24622_c0_g1	TraesCS3A01G009200.1	2515	2982	3081	0	TraesCS3A01G009200	chr3A	8321632	8329985	NBS-LRR-like resistance protein
	TRINITY_DN11226_c1_g2	5.34125	2.4e-12	7.28e-11	UP	TRINITY_DN11226_c1_g2	TraesCS2A01G469900.1	2085	2327	2367	1.93e-49	TraesCS2A01G469900	chr2A	712856200	712858848	Retrovirus-related Pol polyprotein from transposon TNT 1-94
	TRINITY_DN32945_c0_g1	3.83163	2.4e-12	7.28e-11	UP	TRINITY_DN32945_c0_g1	TraesCS3D01G147300.1	106	927	927	1.42e-134	TraesCS3D01G147300	chr3D	111930714	111931847	Retrotransposon protein, putative, Ty1-copia subclass
	TRINITY_DN18131_c1_g3	6.67087	2.43e-12	7.38e-11	UP	TRINITY_DN18131_c1_g3	TraesCS7B01G113000.1	511	162	1476	1.14e-124	TraesCS7B01G113000	chr7B	130745928	130747403	3-ketoacyl-CoA synthase
	TRINITY_DN80432_c3_g1	9.31161	2.45e-12	7.43e-11	UP	NA	NA	NA	NA	NA	NA	NA	NA	NA	NA	NA
	TRINITY_DN88691_c0_g2	9.01359	2.45e-12	7.43e-11	UP	NA	NA	NA	NA	NA	NA	NA	NA	NA	NA	NA
	TRINITY_DN37965_c0_g2	9.32649	2.45e-12	7.44e-11	UP	TRINITY_DN37965_c0_g2	TraesCSU01G133200.1	2505	2766	4350	2.45e-64	TraesCSU01G133200	chrUn	112600697	112619193	Mitogen-activated protein kinase kinase
	TRINITY_DN15749_c0_g1	9.44757	2.5e-12	7.56e-11	UP	NA	NA	NA	NA	NA	NA	NA	NA	NA	NA	NA
	TRINITY_DN68641_c0_g1	5.00413	2.5e-12	7.57e-11	UP	TRINITY_DN68641_c0_g1	TraesCS6A01G379800.1	608	658	1344	1.5e-18	TraesCS6A01G379800	chr6A	600403258	600406136	COBRA-like protein
	TRINITY_DN21975_c0_g1	9.55712	2.53e-12	7.65e-11	UP	NA	NA	NA	NA	NA	NA	NA	NA	NA	NA	NA
	TRINITY_DN7126_c0_g2	4.69653	2.57e-12	7.75e-11	UP	TRINITY_DN7126_c0_g2	TraesCS6B01G192400.1	2610	2298	2943	2.38e-164	TraesCS6B01G192400	chr6B	226400143	226404875	Copper-transporting ATPase
	TRINITY_DN122754_c0_g2	9.61325	2.57e-12	7.75e-11	UP	NA	NA	NA	NA	NA	NA	NA	NA	NA	NA	NA
	TRINITY_DN26409_c0_g1	3.91708	2.65e-12	8e-11	UP	NA	NA	NA	NA	NA	NA	NA	NA	NA	NA	NA
	TRINITY_DN18406_c1_g1	10.2909	2.65e-12	8.01e-11	UP	TRINITY_DN18406_c1_g1	TraesCS5D01G303700.1	2469	2404	2469	3.3e-27	TraesCS5D01G303700	chr5D	399159286	399162072	disease resistance protein (TIR-NBS-LRR class)
	TRINITY_DN16744_c0_g1	12.0339	2.66e-12	8.02e-11	UP	NA	NA	NA	NA	NA	NA	NA	NA	NA	NA	NA
	TRINITY_DN62619_c0_g1	9.3018	2.66e-12	8.02e-11	UP	TRINITY_DN62619_c0_g1	TraesCS6A01G292400.1	156	341	381	5.88e-67	TraesCS6A01G292400	chr6A	524319512	524319892	Kinesin-like protein
	TRINITY_DN46580_c0_g1	9.33877	2.67e-12	8.06e-11	UP	TRINITY_DN46580_c0_g1	TraesCS7D01G546800.1	1143	1230	1230	2.72e-39	TraesCS7D01G546800	chr7D	633393377	633394606	F-box domain containing protein
	TRINITY_DN6307_c0_g1	3.19859	2.68e-12	8.06e-11	UP	NA	NA	NA	NA	NA	NA	NA	NA	NA	NA	NA
	TRINITY_DN1191_c2_g1	10.604	2.68e-12	8.07e-11	UP	NA	NA	NA	NA	NA	NA	NA	NA	NA	NA	NA
	TRINITY_DN175023_c0_g1	9.30114	2.69e-12	8.1e-11	UP	NA	NA	NA	NA	NA	NA	NA	NA	NA	NA	NA
	TRINITY_DN82449_c0_g1	9.40644	2.7e-12	8.12e-11	UP	NA	NA	NA	NA	NA	NA	NA	NA	NA	NA	NA
	TRINITY_DN23932_c2_g4	9.3507	2.75e-12	8.26e-11	UP	NA	NA	NA	NA	NA	NA	NA	NA	NA	NA	NA
	TRINITY_DN15633_c2_g2	5.00322	2.76e-12	8.28e-11	UP	TRINITY_DN15633_c2_g2	TraesCS5A01G307300.1	2102	1404	2805	0	TraesCS5A01G307300	chr5A	519945130	519956066	PHD-finger family protein, expressed
	TRINITY_DN19090_c2_g1	7.44283	2.79e-12	8.38e-11	UP	TRINITY_DN19090_c2_g1	TraesCS5D01G004400.1	1569	628	1569	0	TraesCS5D01G004400	chr5D	3632895	3634463	ATP-dependent zinc metalloprotease FtsH
	TRINITY_DN4243_c0_g1	7.15326	2.81e-12	8.43e-11	UP	TRINITY_DN4243_c0_g1	TraesCS4A01G162600.1	1	309	318	7.37e-127	TraesCS4A01G162600	chr4A	358840185	358840615	DNA-directed RNA polymerase subunit beta
	TRINITY_DN2137_c1_g1	10.2227	2.84e-12	8.51e-11	UP	NA	NA	NA	NA	NA	NA	NA	NA	NA	NA	NA
	TRINITY_DN16617_c0_g1	3.45318	2.86e-12	8.56e-11	UP	TRINITY_DN16617_c0_g1	TraesCS1D01G181100.1	1742	1680	2202	3.82e-15	TraesCS1D01G181100	chr1D	254463783	254465986	Photosystem I P700 chlorophyll a apoprotein A2
	TRINITY_DN32242_c0_g1	3.90051	2.92e-12	8.73e-11	UP	TRINITY_DN32242_c0_g1	TraesCS2D01G151500.1	1	506	1590	0	TraesCS2D01G151500	chr2D	94868486	94870075	FAD-binding Berberine family protein
	TRINITY_DN141162_c3_g2	9.63658	2.93e-12	8.75e-11	UP	TRINITY_DN141162_c3_g2	TraesCS2A01G179500.1	384	420	438	5.93e-09	TraesCS2A01G179500	chr2A	138133652	138134089	IgA FC receptor
	TRINITY_DN13633_c1_g3	5.85032	2.94e-12	8.77e-11	UP	NA	NA	NA	NA	NA	NA	NA	NA	NA	NA	NA
	TRINITY_DN22212_c0_g1	5.1182	2.94e-12	8.77e-11	UP	TRINITY_DN22212_c0_g1	TraesCSU01G075700.1	154	265	270	7.93e-29	TraesCSU01G075700	chrUn	67492553	67492930	lectin protein kinase family protein
	TRINITY_DN31823_c0_g1	6.10741	2.96e-12	8.82e-11	UP	NA	NA	NA	NA	NA	NA	NA	NA	NA	NA	NA
	TRINITY_DN37494_c0_g2	9.37115	2.97e-12	8.85e-11	UP	NA	NA	NA	NA	NA	NA	NA	NA	NA	NA	NA
	TRINITY_DN16944_c0_g1	4.57058	2.98e-12	8.88e-11	UP	TRINITY_DN16944_c0_g1	TraesCS1A01G085600.1	38	77	1449	3.58e-12	TraesCS1A01G085600	chr1A	71690097	71694523	Aminotransferase
	TRINITY_DN23008_c0_g1	9.39853	3.01e-12	8.97e-11	UP	NA	NA	NA	NA	NA	NA	NA	NA	NA	NA	NA
	TRINITY_DN31841_c0_g2	9.39853	3.01e-12	8.97e-11	UP	NA	NA	NA	NA	NA	NA	NA	NA	NA	NA	NA
	TRINITY_DN1687_c1_g1	4.25132	3.02e-12	8.98e-11	UP	TRINITY_DN1687_c1_g1	TraesCSU01G116400.1	209	631	2019	0	TraesCSU01G116400	chrUn	100323369	100327948	Chaperone DnaK
	TRINITY_DN165081_c0_g1	9.34328	3.03e-12	9.02e-11	UP	NA	NA	NA	NA	NA	NA	NA	NA	NA	NA	NA
	TRINITY_DN34447_c3_g1	9.51184	3.06e-12	9.09e-11	UP	TRINITY_DN34447_c3_g1	TraesCS2A01G038100.1	1230	994	1773	8.77e-108	TraesCS2A01G038100	chr2A	16016169	16017941	L-gulonolactone oxidase
	TRINITY_DN24066_c0_g1	5.94372	3.06e-12	9.09e-11	UP	TRINITY_DN24066_c0_g1	TraesCS1B01G094500.1	480	981	981	0	TraesCS1B01G094500	chr1B	96488255	96489494	MYB transcription factor
[truncated: 10,410 more rows]

## Sheet: Downregulated_M3H_vs_P3
	Insight into the mechanisms of terminal HS-tolerance in wheat mutant with improved nutritional quality through de novo transcriptome sequencing Ranjeet R. Kumar, Suman Bakshi, Kavita Dubey, Sumedha Hasija, Gyanendra K. Rai, Neelu Jain, Sanjay Jambhulkar, Bhupinder Singh, Gyanendra P. Singh, & Shelly Praveen
	Table S8 List of differentially expressed transcripts (downregulated) identified in wheat mutant exposed to HS over parent through de novo transcriptome sequencing using Illumina HiSeq 4000
	S. No.	logFC	PValue	FDR	DEGType	Trinity_GeneID	Wheat_Transcript_ID	Transcript_Start	Transcript_End	Transcript length	E value	Wheat_Gene_ID	Chromosome	Gene_Start	Gene_End	Description/Protein Name
	TRINITY_DN1363_c1_g1	-15.1148	1.66e-56	2.95e-52	DOWN	NA	NA	NA	NA	NA	NA	NA	NA	NA	NA	NA
	TRINITY_DN7027_c0_g1	-16.1039	1.58e-55	2.33e-51	DOWN	TRINITY_DN7027_c0_g1	TraesCS3D01G066700.1	10	276	276	1.04e-116	TraesCS3D01G066700	chr3D	29623762	29624489	Ectonucleotide pyrophosphatase/phosphodiesterase family member 1
	TRINITY_DN27029_c2_g1	-16.7721	3.06e-54	3.87e-50	DOWN	TRINITY_DN27029_c2_g1	TraesCS1A01G001500.1	33	242	420	6.13e-99	TraesCS1A01G001500	chr1A	326099	326518	Senescence-associated protein, putative
	TRINITY_DN3951_c0_g2	-14.3454	2.89e-49	1.83e-45	DOWN	TRINITY_DN3951_c0_g2	TraesCS1D01G418800.1	1	189	198	7.63e-47	TraesCS1D01G418800	chr1D	475966984	475967181	trithorax-like protein 2
	TRINITY_DN695_c0_g2	-14.2286	1.64e-48	9.11e-45	DOWN	TRINITY_DN695_c0_g2	TraesCS4A01G311900.1	1	369	369	2.47e-178	TraesCS4A01G311900	chr4A	603504251	603504949	Antimicrobial peptide MBP-1 related (LEM1)
	TRINITY_DN186098_c0_g1	-14.0314	1.75e-48	9.11e-45	DOWN	NA	NA	NA	NA	NA	NA	NA	NA	NA	NA	NA
	TRINITY_DN2384_c0_g1	-13.7548	1.31e-46	4.36e-43	DOWN	NA	NA	NA	NA	NA	NA	NA	NA	NA	NA	NA
	TRINITY_DN41261_c0_g2	-13.8426	1.33e-46	4.36e-43	DOWN	TRINITY_DN41261_c0_g2	TraesCS7B01G025000.1	123	618	618	1.73e-90	TraesCS7B01G025000	chr7B	23638770	23639387	Beta-galactosidase
	TRINITY_DN54761_c0_g1	-14.8858	2.91e-46	9.23e-43	DOWN	TRINITY_DN54761_c0_g1	TraesCS3B01G079800.1	108	206	261	8.32e-44	TraesCS3B01G079800	chr3B	50418762	50419128	S-locus cysteine-rich protein (SCR)
	TRINITY_DN21163_c0_g1	-14.0773	3.95e-46	1.21e-42	DOWN	TRINITY_DN21163_c0_g1	TraesCS7A01G404300.1	46	260	510	1.04e-96	TraesCS7A01G404300	chr7A	585065981	585066490	Zinc finger A20 and AN1 domain stress-associated protein
	TRINITY_DN69925_c0_g1	-14.3505	4.92e-45	1.25e-41	DOWN	TRINITY_DN69925_c0_g1	TraesCS3A01G067000.1	107	162	261	1.15e-21	TraesCS3A01G067000	chr3A	40189531	40190345	S-locus cysteine-rich protein (SCR)
	TRINITY_DN890_c0_g1	-15.3013	5.59e-45	1.38e-41	DOWN	TRINITY_DN890_c0_g1	TraesCS1D01G270100.1	1	279	279	5.36e-140	TraesCS1D01G270100	chr1D	365244969	365245880	Gibberellin-regulated protein 2
	TRINITY_DN53451_c0_g1	-13.5548	1.13e-44	2.49e-41	DOWN	TRINITY_DN53451_c0_g1	TraesCSU01G105300.1	1070	1373	1479	1.13e-132	TraesCSU01G105300	chrUn	92716703	92720318	Catalase
	TRINITY_DN2675_c0_g3	-13.4085	2.11e-44	4.45e-41	DOWN	TRINITY_DN2675_c0_g3	TraesCS2B01G608200.1	7	606	606	0	TraesCS2B01G608200	chr2B	788584947	788586014	Translation initiation factor IF-2
	TRINITY_DN8948_c0_g2	-13.5305	5.15e-44	1.04e-40	DOWN	TRINITY_DN8948_c0_g2	TraesCS7B01G454600.1	1	2367	2373	0	TraesCS7B01G454600	chr7B	715251865	715259121	ARM repeat superfamily protein
	TRINITY_DN10620_c0_g1	-13.5713	1.67e-42	2.85e-39	DOWN	TRINITY_DN10620_c0_g1	TraesCS2B01G608200.1	207	482	606	1.07e-97	TraesCS2B01G608200	chr2B	788584947	788586014	Translation initiation factor IF-2
	TRINITY_DN19775_c0_g1	-13.5188	2.18e-42	3.65e-39	DOWN	TRINITY_DN19775_c0_g1	TraesCS2B01G137300.1	1133	1361	1440	8.36e-118	TraesCS2B01G137300	chr2B	104233460	104237268	Xylose isomerase
	TRINITY_DN24614_c0_g1	-13.1373	4.5e-42	7.26e-39	DOWN	TRINITY_DN24614_c0_g1	TraesCS2D01G531800.1	529	591	591	1.19e-19	TraesCS2D01G531800	chr2D	617405627	617406217	N-alpha-acetyltransferase
	TRINITY_DN13708_c0_g1	-13.7214	8.38e-41	1.14e-37	DOWN	TRINITY_DN13708_c0_g1	TraesCS6B01G058300.1	1913	1998	1998	3.1e-38	TraesCS6B01G058300	chr6B	38763526	38767358	Heat shock 70 kDa protein
	TRINITY_DN174507_c0_g1	-10.8294	1.19e-40	1.55e-37	DOWN	TRINITY_DN174507_c0_g1	TraesCS1A01G351200.1	474	740	765	2.34e-25	TraesCS1A01G351200	chr1A	535769472	535770236	ATP-dependent RNA helicase
	TRINITY_DN2675_c0_g2	-13.4757	1.44e-40	1.86e-37	DOWN	NA	NA	NA	NA	NA	NA	NA	NA	NA	NA	NA
	TRINITY_DN12202_c0_g1	-12.9567	2.27e-40	2.87e-37	DOWN	TRINITY_DN12202_c0_g1	TraesCS7D01G454200.1	570	789	1341	3.85e-96	TraesCS7D01G454200	chr7D	573692185	573694994	Tubulin beta chain
	TRINITY_DN1363_c9_g1	-14.3286	4.49e-39	4.92e-36	DOWN	NA	NA	NA	NA	NA	NA	NA	NA	NA	NA	NA
	TRINITY_DN201331_c0_g1	-13.9498	6.33e-39	6.76e-36	DOWN	NA	NA	NA	NA	NA	NA	NA	NA	NA	NA	NA
	TRINITY_DN86941_c0_g2	-13.0478	7.69e-39	7.93e-36	DOWN	NA	NA	NA	NA	NA	NA	NA	NA	NA	NA	NA
	TRINITY_DN25126_c0_g5	-12.7562	7.96e-39	8.12e-36	DOWN	TRINITY_DN25126_c0_g5	TraesCS3D01G003200.1	480	570	570	7.91e-41	TraesCS3D01G003200	chr3D	1337532	1339476	50S ribosomal protein L6
	TRINITY_DN190_c0_g1	-13.7296	1.88e-37	1.54e-34	DOWN	TRINITY_DN190_c0_g1	TraesCS6A01G408200.1	1	237	558	7.39e-117	TraesCS6A01G408200	chr6A	613097678	613100422	Ribonuclease 3
	TRINITY_DN30859_c2_g2	-13.0251	5.32e-37	4.14e-34	DOWN	TRINITY_DN30859_c2_g2	TraesCS5D01G087400.1	355	55	444	1.04e-58	TraesCS5D01G087400	chr5D	92464098	92464541	MLO protein homolog 1
	TRINITY_DN2721_c1_g3	-12.6669	9.88e-37	7.36e-34	DOWN	TRINITY_DN2721_c1_g3	TraesCS7B01G354200.1	757	843	843	1.9e-26	TraesCS7B01G354200	chr7B	612255302	612256461	Polyubiquitin
	TRINITY_DN1500_c0_g2	-8.44784	1.34e-36	9.83e-34	DOWN	TRINITY_DN1500_c0_g2	TraesCS5D01G282500.1	1	978	1044	0	TraesCS5D01G282500	chr5D	384016125	384017464	Cysteine protease, putative
	TRINITY_DN5149_c2_g1	-10.4463	1.53e-36	1.11e-33	DOWN	TRINITY_DN5149_c2_g1	TraesCSU01G207700.1	621	1152	1152	0	TraesCSU01G207700	chrUn	308271802	308273085	Cysteine protease, putative
	TRINITY_DN695_c0_g1	-15.2657	1.55e-36	1.12e-33	DOWN	TRINITY_DN695_c0_g1	TraesCS1A01G256500.1	1	420	420	0	TraesCS1A01G256500	chr1A	449144820	449145848	Calcium-binding EF-hand family protein
	TRINITY_DN14494_c0_g1	-12.6102	3.25e-36	2.19e-33	DOWN	TRINITY_DN14494_c0_g1	TraesCS2B01G620600.1	1072	1119	1119	3.4e-17	TraesCS2B01G620600	chr2B	795045675	795048475	BTB/POZ domain-containing protein TNFAIP1 isoform 1
	TRINITY_DN185605_c0_g1	-12.661	8.34e-36	5.52e-33	DOWN	NA	NA	NA	NA	NA	NA	NA	NA	NA	NA	NA
	TRINITY_DN55166_c0_g2	-12.6772	1.07e-35	7e-33	DOWN	NA	NA	NA	NA	NA	NA	NA	NA	NA	NA	NA
	TRINITY_DN19173_c0_g1	-13.991	1.45e-35	9.23e-33	DOWN	NA	NA	NA	NA	NA	NA	NA	NA	NA	NA	NA
	TRINITY_DN946_c1_g2	-12.3848	2.31e-35	1.44e-32	DOWN	NA	NA	NA	NA	NA	NA	NA	NA	NA	NA	NA
	TRINITY_DN17420_c0_g1	-12.3887	2.32e-35	1.44e-32	DOWN	NA	NA	NA	NA	NA	NA	NA	NA	NA	NA	NA
	TRINITY_DN61844_c0_g1	-12.3635	3.88e-35	2.31e-32	DOWN	NA	NA	NA	NA	NA	NA	NA	NA	NA	NA	NA
	TRINITY_DN234106_c0_g1	-12.6968	1.43e-34	8.19e-32	DOWN	NA	NA	NA	NA	NA	NA	NA	NA	NA	NA	NA
	TRINITY_DN9744_c0_g2	-12.2748	8.53e-34	4.4e-31	DOWN	TRINITY_DN9744_c0_g2	TraesCS6B01G091800.1	1	249	255	1.31e-86	TraesCS6B01G091800	chr6B	67500003	67500257	EGG APPARATUS-1 protein
	TRINITY_DN11938_c0_g3	-12.2405	9.1e-34	4.67e-31	DOWN	NA	NA	NA	NA	NA	NA	NA	NA	NA	NA	NA
	TRINITY_DN47686_c0_g1	-10.0095	9.66e-34	4.92e-31	DOWN	NA	NA	NA	NA	NA	NA	NA	NA	NA	NA	NA
	TRINITY_DN12340_c1_g1	-7.88315	1.02e-33	5.15e-31	DOWN	NA	NA	NA	NA	NA	NA	NA	NA	NA	NA	NA
	TRINITY_DN18266_c0_g1	-12.1664	6.93e-33	3.4e-30	DOWN	TRINITY_DN18266_c0_g1	TraesCS5A01G073800.1	1	60	249	4.34e-22	TraesCS5A01G073800	chr5A	86181804	86183272	Ubiquitin
	TRINITY_DN30435_c0_g1	-12.0479	1.03e-32	4.91e-30	DOWN	TRINITY_DN30435_c0_g1	TraesCSU01G099700.1	1	56	384	1.5e-21	TraesCSU01G099700	chrUn	88195052	88196458	High mobility group protein
	TRINITY_DN946_c1_g1	-12.154	1.08e-32	5.06e-30	DOWN	TRINITY_DN946_c1_g1	TraesCS6D01G004800.1	849	876	1287	9.82e-06	TraesCS6D01G004800	chr6D	2246606	2250464	tetratricopeptide repeat (TPR)-containing protein
	TRINITY_DN9111_c0_g1	-11.9803	3.67e-32	1.6e-29	DOWN	TRINITY_DN9111_c0_g1	TraesCS5D01G282500.1	821	1044	1044	4.86e-113	TraesCS5D01G282500	chr5D	384016125	384017464	Cysteine protease, putative
	TRINITY_DN45_c0_g1	-11.9669	4.47e-32	1.92e-29	DOWN	TRINITY_DN45_c0_g1	TraesCS7B01G479700.1	1	933	933	0	TraesCS7B01G479700	chr7B	734058331	734060611	Dirigent protein
	TRINITY_DN32739_c0_g1	-9.64788	5.09e-32	2.17e-29	DOWN	NA	NA	NA	NA	NA	NA	NA	NA	NA	NA	NA
	TRINITY_DN26472_c0_g1	-12.0501	7.61e-32	3.21e-29	DOWN	NA	NA	NA	NA	NA	NA	NA	NA	NA	NA	NA
	TRINITY_DN218887_c0_g1	-12.5967	1.26e-31	5.19e-29	DOWN	NA	NA	NA	NA	NA	NA	NA	NA	NA	NA	NA
	TRINITY_DN175141_c0_g1	-12.0101	1.33e-31	5.43e-29	DOWN	TRINITY_DN175141_c0_g1	TraesCSU01G149400.1	1	1248	1248	0	TraesCSU01G149400	chrUn	178187546	178189697	Xanthine permease XanP
	TRINITY_DN779_c0_g1	-7.99131	2.09e-31	8.41e-29	DOWN	TRINITY_DN779_c0_g1	TraesCS7A01G386200.1	34	1050	1473	0	TraesCS7A01G386200	chr7A	561991692	561994013	Beta-glucosidase, putative
	TRINITY_DN5149_c2_g2	-8.49395	2.15e-31	8.62e-29	DOWN	TRINITY_DN5149_c2_g2	TraesCSU01G207700.1	1	642	1152	0	TraesCSU01G207700	chrUn	308271802	308273085	Cysteine protease, putative
	TRINITY_DN1555_c0_g1	-16.5349	4.14e-31	1.6e-28	DOWN	TRINITY_DN1555_c0_g1	TraesCS6A01G028200.1	253	615	615	0	TraesCS6A01G028200	chr6A	14385598	14386381	Protein kinase superfamily protein
	TRINITY_DN9705_c2_g1	-11.8368	8.73e-31	3.29e-28	DOWN	TRINITY_DN9705_c2_g1	TraesCS2D01G248900.1	128	229	909	6.42e-36	TraesCS2D01G248900	chr2D	293857899	293861174	Syntaxin
	TRINITY_DN15530_c0_g1	-12.3401	1.53e-30	5.61e-28	DOWN	TRINITY_DN15530_c0_g1	TraesCS7A01G381100.1	1014	1082	1083	1.49e-25	TraesCS7A01G381100	chr7A	556159456	556161075	Fructose-bisphosphate aldolase
	TRINITY_DN7225_c0_g2	-12.5462	1.72e-30	6.24e-28	DOWN	TRINITY_DN7225_c0_g2	TraesCS2D01G505800.1	1	234	234	2.47e-97	TraesCS2D01G505800	chr2D	599919961	599920404	Zn-dependent exopeptidases superfamily protein
	TRINITY_DN15984_c0_g1	-12.7809	2.04e-30	7.26e-28	DOWN	NA	NA	NA	NA	NA	NA	NA	NA	NA	NA	NA
	TRINITY_DN185930_c0_g1	-12.2456	2.64e-30	9.28e-28	DOWN	NA	NA	NA	NA	NA	NA	NA	NA	NA	NA	NA
	TRINITY_DN4512_c1_g1	-11.7795	4.16e-30	1.42e-27	DOWN	TRINITY_DN4512_c1_g1	TraesCS7B01G186700.1	170	528	528	1.99e-142	TraesCS7B01G186700	chr7B	312023759	312026125	50S ribosomal protein L14
	TRINITY_DN8356_c1_g2	-12.5056	4.53e-30	1.54e-27	DOWN	TRINITY_DN8356_c1_g2	TraesCS2A01G006400.1	1023	1450	1452	0	TraesCS2A01G006400	chr2A	2876192	2877723	Cytochrome P450 family protein, expressed
	TRINITY_DN218060_c0_g1	-12.9604	5.25e-30	1.77e-27	DOWN	NA	NA	NA	NA	NA	NA	NA	NA	NA	NA	NA
	TRINITY_DN12109_c0_g1	-8.36496	9.76e-30	3.22e-27	DOWN	TRINITY_DN12109_c0_g1	TraesCS7D01G389900.1	3660	3741	3741	1.83e-32	TraesCS7D01G389900	chr7D	505129400	505140572	Processing peptidase
	TRINITY_DN24441_c0_g3	-6.0758	1.35e-29	4.35e-27	DOWN	TRINITY_DN24441_c0_g3	TraesCS5D01G087400.1	346	39	444	3.73e-54	TraesCS5D01G087400	chr5D	92464098	92464541	MLO protein homolog 1
	TRINITY_DN217382_c0_g1	-12.9862	1.63e-29	5.14e-27	DOWN	NA	NA	NA	NA	NA	NA	NA	NA	NA	NA	NA
	TRINITY_DN12209_c1_g1	-11.7838	1.94e-29	6.07e-27	DOWN	TRINITY_DN12209_c1_g1	TraesCS4A01G481200.1	544	1471	1608	0	TraesCS4A01G481200	chr4A	737155019	737158174	protein kinase family protein
	TRINITY_DN20123_c0_g1	-13.722	5.53e-29	1.67e-26	DOWN	TRINITY_DN20123_c0_g1	TraesCS5B01G294700.1	1415	1518	1518	4.96e-48	TraesCS5B01G294700	chr5B	478916711	478921170	Beta-glucosidase
	TRINITY_DN6905_c0_g1	-11.7277	6.52e-29	1.96e-26	DOWN	TRINITY_DN6905_c0_g1	TraesCS7B01G275300.1	854	996	996	7.71e-60	TraesCS7B01G275300	chr7B	504476618	504483187	SUMO-activating enzyme subunit 1A
	TRINITY_DN57213_c0_g2	-11.6502	6.58e-29	1.97e-26	DOWN	TRINITY_DN57213_c0_g2	TraesCS7A01G048900.1	548	341	1116	3.57e-101	TraesCS7A01G048900	chr7A	22917957	22921060	zinc finger B-box protein
	TRINITY_DN7225_c0_g1	-9.5622	7.9e-29	2.34e-26	DOWN	TRINITY_DN7225_c0_g1	TraesCS2A01G505100.1	1	234	234	4.31e-120	TraesCS2A01G505100	chr2A	733579702	733580228	Phytochrome C
	TRINITY_DN66552_c0_g1	-12.5476	8.88e-29	2.61e-26	DOWN	NA	NA	NA	NA	NA	NA	NA	NA	NA	NA	NA
	TRINITY_DN12132_c0_g1	-12.0292	1.07e-28	3.13e-26	DOWN	TRINITY_DN12132_c0_g1	TraesCS4A01G381600.1	3244	3945	3951	2.01e-158	TraesCS4A01G381600	chr4A	658964415	658968365	NBS-LRR disease resistance protein-like protein
	TRINITY_DN233809_c0_g1	-11.6334	1.35e-28	3.86e-26	DOWN	NA	NA	NA	NA	NA	NA	NA	NA	NA	NA	NA
	TRINITY_DN1962_c1_g3	-11.798	1.45e-28	4.15e-26	DOWN	NA	NA	NA	NA	NA	NA	NA	NA	NA	NA	NA
	TRINITY_DN12961_c0_g3	-12.8335	2.84e-28	7.8e-26	DOWN	TRINITY_DN12961_c0_g3	TraesCS7A01G426100.1	8	126	870	2.24e-48	TraesCS7A01G426100	chr7A	619165697	619167063	Xyloglucan endotransglucosylase/hydrolase
	TRINITY_DN4353_c0_g1	-12.3487	3.64e-28	9.93e-26	DOWN	TRINITY_DN4353_c0_g1	TraesCS2A01G584800.1	38	1830	1830	0	TraesCS2A01G584800	chr2A	776021786	776024545	Endo-1,4-beta-xylanase
	TRINITY_DN16867_c0_g1	-11.6759	4.35e-28	1.18e-25	DOWN	TRINITY_DN16867_c0_g1	TraesCS2B01G497800.1	254	513	519	5.09e-97	TraesCS2B01G497800	chr2B	694273052	694275662	CRIB domain-containing protein RIC10
	TRINITY_DN21752_c0_g1	-11.7886	4.88e-28	1.32e-25	DOWN	TRINITY_DN21752_c0_g1	TraesCS3B01G276100.1	168	224	1098	2.13e-11	TraesCS3B01G276100	chr3B	445882777	445888269	tRNA-specific adenosine deaminase
	TRINITY_DN10619_c1_g1	-14.2385	7.79e-28	2.07e-25	DOWN	TRINITY_DN10619_c1_g1	TraesCS3A01G213300.2	501	314	501	6.04e-95	TraesCS3A01G213300	chr3A	384731407	384732280	Membrane protein
	TRINITY_DN10888_c0_g2	-11.5695	8.67e-28	2.28e-25	DOWN	TRINITY_DN10888_c0_g2	TraesCS4A01G317800.1	95	202	3210	1.49e-38	TraesCS4A01G317800	chr4A	607045527	607055050	Exportin-1
	TRINITY_DN14804_c0_g1	-11.5135	2.52e-27	6.32e-25	DOWN	TRINITY_DN14804_c0_g1	TraesCS7D01G528300.1	1212	1425	1530	8.03e-93	TraesCS7D01G528300	chr7D	623526542	623530969	Zinc finger FYVE domain-containing protein 1
	TRINITY_DN21004_c0_g1	-12.9751	2.61e-27	6.48e-25	DOWN	TRINITY_DN21004_c0_g1	TraesCS1B01G267400.1	252	438	438	2.09e-94	TraesCS1B01G267400	chr1B	470418858	470419295	Translation initiation factor IF-2
	TRINITY_DN14367_c0_g1	-7.32982	2.92e-27	7.19e-25	DOWN	TRINITY_DN14367_c0_g1	TraesCS3A01G530400.1	97	198	198	2.56e-40	TraesCS3A01G530400	chr3A	743674093	743674290	40S ribosomal protein S28
	TRINITY_DN3754_c2_g1	-10.6225	3.55e-27	8.62e-25	DOWN	TRINITY_DN3754_c2_g1	TraesCS2A01G212500.1	668	1068	1068	0	TraesCS2A01G212500	chr2A	197247475	197249801	CheY-like two-component responsive regulator family protein
	TRINITY_DN8976_c0_g3	-11.4816	3.75e-27	9.05e-25	DOWN	TRINITY_DN8976_c0_g3	TraesCS7B01G337600.1	324	816	1362	3.5e-112	TraesCS7B01G337600	chr7B	592361205	592364588	cDNA clone:J013058P10, full insert sequence
	TRINITY_DN1962_c1_g1	-11.5161	5.22e-27	1.24e-24	DOWN	TRINITY_DN1962_c1_g1	TraesCS5D01G543600.1	375	608	1329	6.02e-61	TraesCS5D01G543600	chr5D	553677988	553682129	26S proteasome non-ATPase regulatory subunit
	TRINITY_DN36168_c1_g1	-11.8029	9.08e-27	2.13e-24	DOWN	NA	NA	NA	NA	NA	NA	NA	NA	NA	NA	NA
	TRINITY_DN35301_c0_g1	-11.4728	9.9e-27	2.3e-24	DOWN	NA	NA	NA	NA	NA	NA	NA	NA	NA	NA	NA
	TRINITY_DN6979_c0_g3	-11.785	1.14e-26	2.63e-24	DOWN	TRINITY_DN6979_c0_g3	TraesCS7B01G152800.1	1024	1158	1158	1.74e-57	TraesCS7B01G152800	chr7B	203027646	203029886	Basic helix-loop-helix transcription factor
	TRINITY_DN55224_c0_g1	-11.5129	1.21e-26	2.77e-24	DOWN	NA	NA	NA	NA	NA	NA	NA	NA	NA	NA	NA
	TRINITY_DN17340_c2_g1	-11.4927	1.23e-26	2.82e-24	DOWN	TRINITY_DN17340_c2_g1	TraesCS3D01G252500.2	866	949	1065	9.71e-22	TraesCS3D01G252500	chr3D	353140925	353157205	WD40 repeat-containing protein
	TRINITY_DN2878_c0_g2	-11.4433	1.49e-26	3.37e-24	DOWN	TRINITY_DN2878_c0_g2	TraesCS4A01G372600.1	192	386	867	2.16e-62	TraesCS4A01G372600	chr4A	647276847	647279733	Hypersensitive-induced response protein
	TRINITY_DN15102_c0_g1	-11.4581	1.69e-26	3.78e-24	DOWN	TRINITY_DN15102_c0_g1	TraesCS3D01G318000.1	1	723	723	0	TraesCS3D01G318000	chr3D	432019767	432020578	Blue copper protein
	TRINITY_DN47096_c0_g2	-12.6503	1.76e-26	3.93e-24	DOWN	NA	NA	NA	NA	NA	NA	NA	NA	NA	NA	NA
	TRINITY_DN13213_c0_g2	-11.4211	2.41e-26	5.32e-24	DOWN	NA	NA	NA	NA	NA	NA	NA	NA	NA	NA	NA
	TRINITY_DN4628_c2_g1	-12.5208	3.16e-26	6.83e-24	DOWN	TRINITY_DN4628_c2_g1	TraesCS2B01G497200.1	3010	4515	4515	0	TraesCS2B01G497200	chr2B	693723701	693732667	NBS-LRR disease resistance protein-like protein
	TRINITY_DN9160_c0_g3	-11.877	3.35e-26	7.21e-24	DOWN	TRINITY_DN9160_c0_g3	TraesCS7B01G483200.1	1	153	507	1.26e-58	TraesCS7B01G483200	chr7B	741250188	741250694	4-hydroxy-4-methyl-2-oxoglutarate aldolase
	TRINITY_DN86440_c2_g1	-8.88578	3.66e-26	7.84e-24	DOWN	TRINITY_DN86440_c2_g1	TraesCS2B01G601600.1	60	468	468	0	TraesCS2B01G601600	chr2B	784304407	784305180	HAT family dimerisation domain containing protein
	TRINITY_DN11526_c0_g1	-8.91522	4.11e-26	8.77e-24	DOWN	NA	NA	NA	NA	NA	NA	NA	NA	NA	NA	NA
	TRINITY_DN92_c0_g3	-11.5666	4.27e-26	9.06e-24	DOWN	TRINITY_DN92_c0_g3	TraesCS2D01G147900.1	1	1107	1107	0	TraesCS2D01G147900	chr2D	89214827	89216204	U3 small nucleolar RNA-associated protein 18-like protein
	TRINITY_DN38568_c0_g1	-11.383	4.8e-26	1.01e-23	DOWN	TRINITY_DN38568_c0_g1	TraesCS5B01G024600.1	1	232	2319	6.5e-106	TraesCS5B01G024600	chr5B	23424913	23427461	Subtilisin-like protease
	TRINITY_DN36912_c0_g1	-5.56464	5.37e-26	1.12e-23	DOWN	NA	NA	NA	NA	NA	NA	NA	NA	NA	NA	NA
	TRINITY_DN3951_c0_g1	-12.2104	5.48e-26	1.14e-23	DOWN	TRINITY_DN3951_c0_g1	TraesCS3B01G213300.1	1	198	198	2.98e-98	TraesCS3B01G213300	chr3B	252853745	252853942	INO80 complex subunit D-like protein
	TRINITY_DN7325_c0_g2	-11.364	6.91e-26	1.43e-23	DOWN	TRINITY_DN7325_c0_g2	TraesCS5A01G107100.1	254	282	288	2.12e-06	TraesCS5A01G107100	chr5A	180347402	180347689	kinesin 3
	TRINITY_DN44316_c0_g1	-11.6275	7.29e-26	1.5e-23	DOWN	TRINITY_DN44316_c0_g1	TraesCS7D01G551700.1	256	462	507	1.28e-95	TraesCS7D01G551700	chr7D	634897788	634898294	4-hydroxy-4-methyl-2-oxoglutarate aldolase
	TRINITY_DN61594_c0_g1	-11.3949	1.85e-25	3.65e-23	DOWN	TRINITY_DN61594_c0_g1	TraesCS7B01G376200.1	1	113	537	3.04e-49	TraesCS7B01G376200	chr7B	641148508	641150425	Zinc-binding protein
	TRINITY_DN43500_c0_g1	-12.022	2.18e-25	4.24e-23	DOWN	TRINITY_DN43500_c0_g1	TraesCS4D01G002200.1	1	332	414	1.68e-166	TraesCS4D01G002200	chr4D	1251039	1251879	Leucine-rich repeat protein kinase family protein
	TRINITY_DN9490_c0_g2	-11.2946	2.69e-25	5.22e-23	DOWN	NA	NA	NA	NA	NA	NA	NA	NA	NA	NA	NA
	TRINITY_DN12296_c0_g1	-12.261	2.77e-25	5.36e-23	DOWN	TRINITY_DN12296_c0_g1	TraesCS7A01G471000.1	1	224	1599	3.54e-98	TraesCS7A01G471000	chr7A	667211212	667214217	ATP-dependent zinc metalloprotease FTSH protein
	TRINITY_DN66171_c1_g1	-11.5672	3.05e-25	5.89e-23	DOWN	TRINITY_DN66171_c1_g1	TraesCS5A01G157100.1	736	1029	1398	1.89e-115	TraesCS5A01G157100	chr5A	335709215	335711731	HAT transposon superfamily
	TRINITY_DN1072_c3_g1	-11.3074	3.42e-25	6.56e-23	DOWN	NA	NA	NA	NA	NA	NA	NA	NA	NA	NA	NA
	TRINITY_DN16931_c0_g2	-12.392	3.88e-25	7.35e-23	DOWN	NA	NA	NA	NA	NA	NA	NA	NA	NA	NA	NA
	TRINITY_DN25189_c0_g2	-8.10061	4.04e-25	7.63e-23	DOWN	NA	NA	NA	NA	NA	NA	NA	NA	NA	NA	NA
	TRINITY_DN17241_c0_g1	-11.357	5.84e-25	1.09e-22	DOWN	NA	NA	NA	NA	NA	NA	NA	NA	NA	NA	NA
	TRINITY_DN37737_c0_g1	-11.3209	5.86e-25	1.09e-22	DOWN	NA	NA	NA	NA	NA	NA	NA	NA	NA	NA	NA
	TRINITY_DN13213_c0_g1	-8.29414	7.04e-25	1.31e-22	DOWN	TRINITY_DN13213_c0_g1	TraesCS3A01G234200.1	37	467	492	8.4e-118	TraesCS3A01G234200	chr3A	437677171	437677804	PGL/p-HBAD biosynthesis glycosyltransferase MT3031
	TRINITY_DN44034_c0_g1	-11.3194	7.06e-25	1.31e-22	DOWN	TRINITY_DN44034_c0_g1	TraesCS7A01G432100.1	1124	1203	1203	2.14e-31	TraesCS7A01G432100	chr7A	625742878	625745930	Zinc finger protein
	TRINITY_DN86797_c0_g2	-11.2774	7.44e-25	1.37e-22	DOWN	TRINITY_DN86797_c0_g2	TraesCS6A01G136700.1	1	44	462	6.37e-15	TraesCS6A01G136700	chr6A	107797521	107798928	Polyubiquitin
	TRINITY_DN236412_c0_g1	-12.307	8.29e-25	1.52e-22	DOWN	NA	NA	NA	NA	NA	NA	NA	NA	NA	NA	NA
	TRINITY_DN4537_c1_g3	-11.3471	1.13e-24	2e-22	DOWN	NA	NA	NA	NA	NA	NA	NA	NA	NA	NA	NA
	TRINITY_DN220044_c0_g1	-8.92244	1.51e-24	2.66e-22	DOWN	NA	NA	NA	NA	NA	NA	NA	NA	NA	NA	NA
	TRINITY_DN253_c0_g2	-11.278	1.88e-24	3.25e-22	DOWN	TRINITY_DN253_c0_g2	TraesCS2B01G549500.1	1402	1621	1626	2.28e-97	TraesCS2B01G549500	chr2B	745714123	745717961	Glutamyl-tRNA(Gln) amidotransferase subunit A
	TRINITY_DN201406_c0_g1	-11.1984	2.4e-24	4.12e-22	DOWN	NA	NA	NA	NA	NA	NA	NA	NA	NA	NA	NA
	TRINITY_DN15388_c0_g2	-11.2668	2.49e-24	4.27e-22	DOWN	TRINITY_DN15388_c0_g2	TraesCS4A01G444300.1	3495	3531	3531	6.57e-11	TraesCS4A01G444300	chr4A	712863210	712873993	Phosphoglucan, water dikinase
	TRINITY_DN19420_c0_g1	-11.1898	2.78e-24	4.73e-22	DOWN	TRINITY_DN19420_c0_g1	TraesCS7D01G423400.1	1864	1923	1923	3.88e-22	TraesCS7D01G423400	chr7D	543725129	543729776	Kelch repeat-containing protein 1
	TRINITY_DN34803_c0_g4	-11.2389	3.9e-24	6.54e-22	DOWN	NA	NA	NA	NA	NA	NA	NA	NA	NA	NA	NA
	TRINITY_DN12654_c0_g2	-9.85309	4.14e-24	6.92e-22	DOWN	NA	NA	NA	NA	NA	NA	NA	NA	NA	NA	NA
	TRINITY_DN88300_c0_g5	-11.1796	4.91e-24	8.18e-22	DOWN	TRINITY_DN88300_c0_g5	TraesCS1A01G228700.1	371	459	459	3.54e-38	TraesCS1A01G228700	chr1A	400955575	400956033	Histone H2B
	TRINITY_DN4277_c0_g1	-6.4517	5.09e-24	8.44e-22	DOWN	TRINITY_DN4277_c0_g1	TraesCS3B01G264300.1	1	1059	1059	0	TraesCS3B01G264300	chr3B	423364138	423365196	MBOAT (membrane bound O-acyl transferase) family protein
	TRINITY_DN11193_c1_g1	-11.2918	5.09e-24	8.44e-22	DOWN	NA	NA	NA	NA	NA	NA	NA	NA	NA	NA	NA
	TRINITY_DN4031_c0_g3	-12.0458	6.08e-24	9.99e-22	DOWN	TRINITY_DN4031_c0_g3	TraesCS7A01G453100.1	1	154	1113	4.16e-66	TraesCS7A01G453100	chr7A	646956335	646958750	transmembrane protein, putative (Protein of unknown function, DUF642)
	TRINITY_DN17623_c0_g4	-11.1682	7.9e-24	1.29e-21	DOWN	TRINITY_DN17623_c0_g4	TraesCS6A01G406900.1	1121	1479	1479	0	TraesCS6A01G406900	chr6A	612107354	612109520	F-box family protein
	TRINITY_DN32590_c0_g1	-11.1415	9.05e-24	1.46e-21	DOWN	TRINITY_DN32590_c0_g1	TraesCS2B01G620900.1	689	921	1029	1.12e-106	TraesCS2B01G620900	chr2B	795062828	795064882	EamA-like transporter family protein
	TRINITY_DN21167_c0_g1	-11.1392	9.32e-24	1.5e-21	DOWN	TRINITY_DN21167_c0_g1	TraesCS2A01G584800.1	1424	1830	1830	0	TraesCS2A01G584800	chr2A	776021786	776024545	Endo-1,4-beta-xylanase
	TRINITY_DN1008_c2_g1	-11.1527	1.32e-23	2.1e-21	DOWN	TRINITY_DN1008_c2_g1	TraesCS1D01G389900.1	1074	1131	1131	9.8e-23	TraesCS1D01G389900	chr1D	461485497	461487375	GDSL esterase/lipase
	TRINITY_DN22046_c0_g1	-11.9757	1.44e-23	2.29e-21	DOWN	NA	NA	NA	NA	NA	NA	NA	NA	NA	NA	NA
	TRINITY_DN6251_c0_g1	-12.8111	1.5e-23	2.37e-21	DOWN	TRINITY_DN6251_c0_g1	TraesCS7B01G273900.1	1	1563	1563	0	TraesCS7B01G273900	chr7B	503106686	503108248	FAD-binding Berberine family protein
	TRINITY_DN4053_c1_g1	-11.3172	1.83e-23	2.87e-21	DOWN	NA	NA	NA	NA	NA	NA	NA	NA	NA	NA	NA
	TRINITY_DN25780_c0_g1	-11.0831	2.38e-23	3.68e-21	DOWN	TRINITY_DN25780_c0_g1	TraesCS7A01G426700.1	596	831	870	2.51e-88	TraesCS7A01G426700	chr7A	619632998	619634026	Xyloglucan endotransglucosylase/hydrolase
	TRINITY_DN4912_c0_g1	-11.1909	3.16e-23	4.85e-21	DOWN	NA	NA	NA	NA	NA	NA	NA	NA	NA	NA	NA
	TRINITY_DN3138_c1_g1	-11.0704	3.16e-23	4.85e-21	DOWN	NA	NA	NA	NA	NA	NA	NA	NA	NA	NA	NA
	TRINITY_DN13453_c0_g1	-11.2551	3.46e-23	5.29e-21	DOWN	NA	NA	NA	NA	NA	NA	NA	NA	NA	NA	NA
	TRINITY_DN16918_c0_g2	-11.0731	4.29e-23	6.51e-21	DOWN	NA	NA	NA	NA	NA	NA	NA	NA	NA	NA	NA
	TRINITY_DN43456_c0_g1	-11.1932	5.24e-23	7.85e-21	DOWN	TRINITY_DN43456_c0_g1	TraesCS6B01G182700.1	1	123	612	8.42e-59	TraesCS6B01G182700	chr6B	204476209	204477557	senescence-associated family protein, putative (DUF581)
	TRINITY_DN35010_c0_g4	-6.33938	5.34e-23	7.99e-21	DOWN	TRINITY_DN35010_c0_g4	TraesCS7B01G354000.1	1	137	696	1.39e-61	TraesCS7B01G354000	chr7B	611729773	611742359	Polyubiquitin
	TRINITY_DN18197_c0_g1	-11.0784	5.36e-23	8.01e-21	DOWN	TRINITY_DN18197_c0_g1	TraesCS2A01G010200.1	35	126	1233	1.28e-31	TraesCS2A01G010200	chr2A	3964870	3967583	StAR-related lipid transfer protein
	TRINITY_DN25341_c0_g1	-5.33444	5.52e-23	8.21e-21	DOWN	TRINITY_DN25341_c0_g1	TraesCS7A01G517700.1	1728	2070	2070	5.64e-171	TraesCS7A01G517700	chr7A	701638298	701642686	Pyrophosphate-energized vacuolar membrane proton pump
	TRINITY_DN222562_c0_g1	-11.1158	5.61e-23	8.32e-21	DOWN	TRINITY_DN222562_c0_g1	TraesCS7A01G047500.1	465	906	906	0	TraesCS7A01G047500	chr7A	21514000	21514905	Segregation and condensation protein A
	TRINITY_DN5872_c0_g2	-11.0865	5.69e-23	8.42e-21	DOWN	TRINITY_DN5872_c0_g2	TraesCS4B01G216500.1	15	137	621	4.39e-41	TraesCS4B01G216500	chr4B	456380063	456381197	P-loop containing nucleoside triphosphate hydrolases superfamily protein
	TRINITY_DN18402_c0_g2	-11.1293	5.93e-23	8.72e-21	DOWN	TRINITY_DN18402_c0_g2	TraesCS7B01G460600.1	1238	1661	2064	3.92e-127	TraesCS7B01G460600	chr7B	718082067	718100392	receptor kinase 1
	TRINITY_DN77313_c0_g1	-11.1046	6e-23	8.8e-21	DOWN	TRINITY_DN77313_c0_g1	TraesCS7D01G521800.1	883	1109	1617	2.35e-103	TraesCS7D01G521800	chr7D	618873923	618875539	WD repeat-containing protein
	TRINITY_DN13499_c1_g2	-11.2403	8.86e-23	1.28e-20	DOWN	TRINITY_DN13499_c1_g2	TraesCS1B01G023800.1	157	941	1398	0	TraesCS1B01G023800	chr1B	11177587	11182597	Serine carboxypeptidase, putative
	TRINITY_DN4793_c0_g2	-11.0524	9.55e-23	1.37e-20	DOWN	TRINITY_DN4793_c0_g2	TraesCS7A01G539900.1	1950	2332	2361	1.36e-80	TraesCS7A01G539900	chr7A	717069898	717078936	Receptor-like protein kinase
	TRINITY_DN18069_c1_g1	-11.0264	1.03e-22	1.47e-20	DOWN	TRINITY_DN18069_c1_g1	TraesCS6D01G033200.1	53	127	282	7.43e-22	TraesCS6D01G033200	chr6D	14011293	14013117	Ribosomal protein L37
	TRINITY_DN70387_c0_g1	-11.0557	1.03e-22	1.47e-20	DOWN	NA	NA	NA	NA	NA	NA	NA	NA	NA	NA	NA
	TRINITY_DN2726_c1_g1	-10.2583	1.13e-22	1.6e-20	DOWN	TRINITY_DN2726_c1_g1	TraesCS2A01G212500.1	1	186	1068	1.78e-70	TraesCS2A01G212500	chr2A	197247475	197249801	CheY-like two-component responsive regulator family protein
	TRINITY_DN5996_c0_g3	-8.65353	1.15e-22	1.62e-20	DOWN	NA	NA	NA	NA	NA	NA	NA	NA	NA	NA	NA
	TRINITY_DN16086_c0_g2	-12.122	1.29e-22	1.79e-20	DOWN	NA	NA	NA	NA	NA	NA	NA	NA	NA	NA	NA
	TRINITY_DN13000_c0_g1	-11.0722	1.36e-22	1.88e-20	DOWN	TRINITY_DN13000_c0_g1	TraesCS3A01G149500.1	1	1326	1326	0	TraesCS3A01G149500	chr3A	134600661	134603185	Flavin-containing monooxygenase
	TRINITY_DN16713_c0_g1	-11.2903	1.36e-22	1.88e-20	DOWN	TRINITY_DN16713_c0_g1	TraesCS7A01G364300.1	108	208	4560	1.36e-29	TraesCS7A01G364300	chr7A	538574080	538583049	RNA polymerase II-associated protein 1
	TRINITY_DN597_c3_g1	-11.1332	1.42e-22	1.96e-20	DOWN	NA	NA	NA	NA	NA	NA	NA	NA	NA	NA	NA
	TRINITY_DN23452_c0_g1	-7.27455	1.58e-22	2.17e-20	DOWN	TRINITY_DN23452_c0_g1	TraesCS2D01G154100.1	415	569	897	7.87e-45	TraesCS2D01G154100	chr2D	97273800	97276305	Phosphoserine phosphatase
	TRINITY_DN4691_c0_g1	-11.8252	1.59e-22	2.17e-20	DOWN	TRINITY_DN4691_c0_g1	TraesCS4A01G365800.1	53	657	657	0	TraesCS4A01G365800	chr4A	639073074	639073730	Invertase/pectin methylesterase inhibitor family protein
	TRINITY_DN1751_c0_g1	-7.55851	1.6e-22	2.19e-20	DOWN	TRINITY_DN1751_c0_g1	TraesCS2D01G278500.1	1	1056	1056	0	TraesCS2D01G278500	chr2D	349727350	349728655	GDSL esterase/lipase
	TRINITY_DN31686_c0_g1	-11.0933	1.65e-22	2.25e-20	DOWN	NA	NA	NA	NA	NA	NA	NA	NA	NA	NA	NA
	TRINITY_DN32763_c0_g1	-10.9922	1.66e-22	2.25e-20	DOWN	NA	NA	NA	NA	NA	NA	NA	NA	NA	NA	NA
	TRINITY_DN60272_c0_g1	-10.9824	1.85e-22	2.51e-20	DOWN	TRINITY_DN60272_c0_g1	TraesCS7B01G489700.1	905	1149	1533	5.47e-110	TraesCS7B01G489700	chr7B	743616728	743620219	Signal peptide peptidase-like protein
	TRINITY_DN95308_c0_g1	-11.2843	2.11e-22	2.85e-20	DOWN	NA	NA	NA	NA	NA	NA	NA	NA	NA	NA	NA
	TRINITY_DN31608_c0_g1	-10.9739	2.52e-22	3.37e-20	DOWN	TRINITY_DN31608_c0_g1	TraesCS5A01G157100.1	69	418	1398	3.54e-148	TraesCS5A01G157100	chr5A	335709215	335711731	HAT transposon superfamily
	TRINITY_DN30085_c0_g1	-10.9618	3.12e-22	4.13e-20	DOWN	TRINITY_DN30085_c0_g1	TraesCS1A01G101700.1	2129	2074	2196	1.39e-18	TraesCS1A01G101700	chr1A	97954954	97957149	Disease resistance protein (NBS-LRR class) family
	TRINITY_DN31693_c1_g1	-11.1103	3.2e-22	4.24e-20	DOWN	TRINITY_DN31693_c1_g1	TraesCS6D01G381400.1	830	1173	1431	7.31e-165	TraesCS6D01G381400	chr6D	461854537	461856190	F-box/RNI-like/FBD-like domains-containing protein
	TRINITY_DN32204_c0_g1	-11.6112	3.24e-22	4.29e-20	DOWN	NA	NA	NA	NA	NA	NA	NA	NA	NA	NA	NA
	TRINITY_DN56816_c0_g1	-8.46169	3.32e-22	4.37e-20	DOWN	TRINITY_DN56816_c0_g1	TraesCS4A01G481300.1	275	628	2250	1.59e-111	TraesCS4A01G481300	chr4A	737194092	737205711	receptor kinase 1
	TRINITY_DN202506_c0_g1	-11.0992	3.77e-22	4.93e-20	DOWN	TRINITY_DN202506_c0_g1	TraesCS5D01G552600.1	1499	1837	1845	5.13e-63	TraesCS5D01G552600	chr5D	557889189	557892592	F-box family protein
	TRINITY_DN49468_c0_g3	-11.3776	4.41e-22	5.72e-20	DOWN	NA	NA	NA	NA	NA	NA	NA	NA	NA	NA	NA
	TRINITY_DN18980_c0_g1	-7.39246	4.41e-22	5.72e-20	DOWN	TRINITY_DN18980_c0_g1	TraesCS6D01G069400.1	1417	1646	1665	3.63e-113	TraesCS6D01G069400	chr6D	34927251	34929442	Basic helix-loop-helix (BHLH) Transcription Factor
	TRINITY_DN44248_c0_g2	-11.0046	4.71e-22	6.1e-20	DOWN	TRINITY_DN44248_c0_g2	TraesCS7A01G016400.1	1	384	384	0	TraesCS7A01G016400	chr7A	7064964	7066940	RING/U-box superfamily protein
	TRINITY_DN25168_c0_g1	-10.9748	5.67e-22	7.23e-20	DOWN	TRINITY_DN25168_c0_g1	TraesCS7B01G432900.1	394	647	1464	1.22e-111	TraesCS7B01G432900	chr7B	700570538	700578535	Sugar transporter
	TRINITY_DN97404_c0_g1	-11.4404	5.94e-22	7.58e-20	DOWN	TRINITY_DN97404_c0_g1	TraesCS7A01G512300.1	907	990	990	1.13e-28	TraesCS7A01G512300	chr7A	699733347	699736640	Indole-3-glycerol phosphate synthase-like
	TRINITY_DN48431_c0_g1	-5.41805	7.66e-22	9.61e-20	DOWN	NA	NA	NA	NA	NA	NA	NA	NA	NA	NA	NA
	TRINITY_DN33592_c1_g1	-11.5516	9.84e-22	1.22e-19	DOWN	TRINITY_DN33592_c1_g1	TraesCS6A01G336800.1	2669	2904	3024	2.45e-113	TraesCS6A01G336800	chr6A	570918487	570929001	Isoleucine--tRNA ligase
	TRINITY_DN17106_c0_g1	-11.97	1.03e-21	1.28e-19	DOWN	TRINITY_DN17106_c0_g1	TraesCS5B01G564000.1	1	486	486	0	TraesCS5B01G564000	chr5B	709561223	709561798	Early nodulin-like protein
	TRINITY_DN38515_c0_g2	-10.8987	1.1e-21	1.36e-19	DOWN	NA	NA	NA	NA	NA	NA	NA	NA	NA	NA	NA
	TRINITY_DN4912_c0_g2	-10.9518	1.2e-21	1.47e-19	DOWN	NA	NA	NA	NA	NA	NA	NA	NA	NA	NA	NA
	TRINITY_DN203168_c0_g1	-11.1541	1.25e-21	1.54e-19	DOWN	NA	NA	NA	NA	NA	NA	NA	NA	NA	NA	NA
	TRINITY_DN3623_c1_g2	-10.9469	1.29e-21	1.57e-19	DOWN	TRINITY_DN3623_c1_g2	TraesCS2D01G545700.1	1663	1881	2604	8e-103	TraesCS2D01G545700	chr2D	622348855	622363820	Cyclopropane-fatty-acyl-phospholipid synthase
	TRINITY_DN956_c0_g2	-6.50643	1.31e-21	1.6e-19	DOWN	TRINITY_DN956_c0_g2	TraesCS7B01G482100.1	998	3099	3099	0	TraesCS7B01G482100	chr7B	739927658	739933838	Protein argonaute
	TRINITY_DN17654_c1_g1	-11.0492	1.52e-21	1.85e-19	DOWN	NA	NA	NA	NA	NA	NA	NA	NA	NA	NA	NA
	TRINITY_DN201545_c0_g1	-10.8812	1.53e-21	1.86e-19	DOWN	NA	NA	NA	NA	NA	NA	NA	NA	NA	NA	NA
	TRINITY_DN55490_c0_g1	-10.9043	1.55e-21	1.87e-19	DOWN	NA	NA	NA	NA	NA	NA	NA	NA	NA	NA	NA
	TRINITY_DN12654_c1_g1	-13.2721	1.61e-21	1.94e-19	DOWN	TRINITY_DN12654_c1_g1	TraesCS2A01G212500.1	711	842	1068	2.95e-30	TraesCS2A01G212500	chr2A	197247475	197249801	CheY-like two-component responsive regulator family protein
	TRINITY_DN27781_c0_g1	-10.9502	1.65e-21	1.98e-19	DOWN	NA	NA	NA	NA	NA	NA	NA	NA	NA	NA	NA
	TRINITY_DN13499_c1_g3	-7.08324	1.69e-21	2.02e-19	DOWN	NA	NA	NA	NA	NA	NA	NA	NA	NA	NA	NA
	TRINITY_DN14305_c0_g2	-11.0305	1.9e-21	2.28e-19	DOWN	TRINITY_DN14305_c0_g2	TraesCS4B01G148800.1	433	520	534	1.62e-27	TraesCS4B01G148800	chr4B	217596586	217610212	Long-chain specific acyl-CoA dehydrogenase, mitochondrial
	TRINITY_DN1976_c0_g2	-10.8826	1.98e-21	2.36e-19	DOWN	NA	NA	NA	NA	NA	NA	NA	NA	NA	NA	NA
	TRINITY_DN15307_c2_g1	-11.14	2.61e-21	3.08e-19	DOWN	TRINITY_DN15307_c2_g1	TraesCS1B01G374100.2	1733	1531	1740	9.64e-102	TraesCS1B01G374100	chr1B	604549290	604553146	IQ domain-containing protein
	TRINITY_DN15820_c0_g3	-10.847	2.64e-21	3.11e-19	DOWN	NA	NA	NA	NA	NA	NA	NA	NA	NA	NA	NA
	TRINITY_DN29785_c0_g4	-10.845	2.67e-21	3.14e-19	DOWN	NA	NA	NA	NA	NA	NA	NA	NA	NA	NA	NA
	TRINITY_DN41250_c5_g1	-11.8622	2.71e-21	3.19e-19	DOWN	TRINITY_DN41250_c5_g1	TraesCS2A01G044900.1	1448	1246	1656	9.64e-102	TraesCS2A01G044900	chr2A	17679674	17681625	Cytochrome P450 family protein
	TRINITY_DN106286_c3_g1	-10.9026	2.76e-21	3.24e-19	DOWN	NA	NA	NA	NA	NA	NA	NA	NA	NA	NA	NA
	TRINITY_DN19869_c0_g1	-12.0797	2.87e-21	3.36e-19	DOWN	TRINITY_DN19869_c0_g1	TraesCS7A01G460000.1	76	360	360	3.51e-99	TraesCS7A01G460000	chr7A	655446833	655448174	Cell division cycle 5-like protein
	TRINITY_DN11327_c0_g3	-8.36433	3.25e-21	3.78e-19	DOWN	NA	NA	NA	NA	NA	NA	NA	NA	NA	NA	NA
	TRINITY_DN3447_c1_g1	-11.077	3.41e-21	3.95e-19	DOWN	NA	NA	NA	NA	NA	NA	NA	NA	NA	NA	NA
	TRINITY_DN9673_c1_g1	-8.15365	4.05e-21	4.65e-19	DOWN	NA	NA	NA	NA	NA	NA	NA	NA	NA	NA	NA
	TRINITY_DN46120_c0_g1	-4.49096	4.24e-21	4.86e-19	DOWN	TRINITY_DN46120_c0_g1	TraesCS2A01G038400.2	1279	1536	1536	3.08e-120	TraesCS2A01G038400	chr2A	16083847	16088456	Beta-glucosidase
	TRINITY_DN3754_c10_g1	-9.6751	4.76e-21	5.38e-19	DOWN	NA	NA	NA	NA	NA	NA	NA	NA	NA	NA	NA
	TRINITY_DN41745_c1_g1	-10.998	4.84e-21	5.46e-19	DOWN	NA	NA	NA	NA	NA	NA	NA	NA	NA	NA	NA
	TRINITY_DN22468_c1_g1	-10.9072	5.89e-21	6.58e-19	DOWN	NA	NA	NA	NA	NA	NA	NA	NA	NA	NA	NA
	TRINITY_DN17170_c0_g1	-10.8236	6.08e-21	6.77e-19	DOWN	TRINITY_DN17170_c0_g1	TraesCS6B01G121900.1	1049	1080	1755	3.9e-06	TraesCS6B01G121900	chr6B	116602993	116607207	Anthranilate phosphoribosyltransferase
	TRINITY_DN39256_c0_g1	-12.1979	6.1e-21	6.79e-19	DOWN	TRINITY_DN39256_c0_g1	TraesCS1D01G032200.1	9	1932	2832	0	TraesCS1D01G032200	chr1D	12532825	12536376	NBS-LRR-like resistance protein
	TRINITY_DN52142_c0_g1	-11.3417	7.63e-21	8.4e-19	DOWN	TRINITY_DN52142_c0_g1	TraesCS7A01G503200.1	129	795	795	0	TraesCS7A01G503200	chr7A	692128188	692131082	Bidirectional sugar transporter SWEET
	TRINITY_DN8688_c0_g3	-10.8658	7.95e-21	8.73e-19	DOWN	TRINITY_DN8688_c0_g3	TraesCS7D01G539400.1	145	221	240	4.4e-21	TraesCS7D01G539400	chr7D	629781759	629782221	Kinesin-like
	TRINITY_DN31999_c0_g1	-7.23147	8.14e-21	8.91e-19	DOWN	NA	NA	NA	NA	NA	NA	NA	NA	NA	NA	NA
	TRINITY_DN32731_c0_g1	-11.1242	9.09e-21	9.91e-19	DOWN	TRINITY_DN32731_c0_g1	TraesCS5A01G411200.1	325	477	1866	2.6e-52	TraesCS5A01G411200	chr5A	599809090	599814381	Succinate dehydrogenase [ubiquinone] flavoprotein subunit, mitochondrial
	TRINITY_DN5914_c0_g3	-10.9653	9.09e-21	9.91e-19	DOWN	TRINITY_DN5914_c0_g3	TraesCS7A01G562700.1	439	567	567	1.17e-48	TraesCS7A01G562700	chr7A	733337850	733339850	Coiled-coil domain-containing protein 12
	TRINITY_DN19800_c0_g1	-10.7854	9.59e-21	1.04e-18	DOWN	NA	NA	NA	NA	NA	NA	NA	NA	NA	NA	NA
	TRINITY_DN10332_c0_g2	-5.68974	9.85e-21	1.07e-18	DOWN	NA	NA	NA	NA	NA	NA	NA	NA	NA	NA	NA
	TRINITY_DN9171_c0_g1	-5.2484	1e-20	1.08e-18	DOWN	TRINITY_DN9171_c0_g1	TraesCS6B01G018900.2	1	857	942	0	TraesCS6B01G018900	chr6B	11584920	11586368	Isoflavone reductase-like protein
	TRINITY_DN3722_c0_g1	-4.63494	1.04e-20	1.12e-18	DOWN	NA	NA	NA	NA	NA	NA	NA	NA	NA	NA	NA
	TRINITY_DN62968_c1_g1	-10.8683	1.08e-20	1.17e-18	DOWN	TRINITY_DN62968_c1_g1	TraesCS5A01G550800.1	68	168	534	8.45e-33	TraesCS5A01G550800	chr5A	704344835	704346403	Nascent polypeptide-associated complex subunit beta
	TRINITY_DN7122_c0_g2	-4.59584	1.47e-20	1.56e-18	DOWN	TRINITY_DN7122_c0_g2	TraesCS7A01G426700.1	580	870	870	3.88e-150	TraesCS7A01G426700	chr7A	619632998	619634026	Xyloglucan endotransglucosylase/hydrolase
	TRINITY_DN13840_c0_g1	-10.8859	1.65e-20	1.75e-18	DOWN	TRINITY_DN13840_c0_g1	TraesCS6B01G437400.2	1	492	492	0	TraesCS6B01G437400	chr6B	704411117	704411974	Subtilase family protein
	TRINITY_DN13837_c0_g1	-12.8118	1.67e-20	1.76e-18	DOWN	TRINITY_DN13837_c0_g1	TraesCS5D01G094400.1	1	169	480	1.69e-84	TraesCS5D01G094400	chr5D	104112667	104113146	Pathogenesis-related thaumatin-like protein
	TRINITY_DN14703_c0_g1	-10.8675	1.67e-20	1.77e-18	DOWN	TRINITY_DN14703_c0_g1	TraesCS7A01G016500.2	278	1014	1014	0	TraesCS7A01G016500	chr7A	7127528	7135473	DNA-directed RNA polymerase subunit alpha
	TRINITY_DN12654_c0_g1	-12.5284	2.08e-20	2.17e-18	DOWN	TRINITY_DN12654_c0_g1	TraesCS2A01G212500.1	868	682	1068	1.07e-72	TraesCS2A01G212500	chr2A	197247475	197249801	CheY-like two-component responsive regulator family protein
	TRINITY_DN1259_c2_g1	-10.8603	2.35e-20	2.45e-18	DOWN	NA	NA	NA	NA	NA	NA	NA	NA	NA	NA	NA
	TRINITY_DN26244_c0_g1	-10.7741	2.43e-20	2.53e-18	DOWN	NA	NA	NA	NA	NA	NA	NA	NA	NA	NA	NA
	TRINITY_DN28918_c0_g2	-10.9776	2.48e-20	2.57e-18	DOWN	TRINITY_DN28918_c0_g2	TraesCS2D01G513500.1	411	683	1080	1.68e-130	TraesCS2D01G513500	chr2D	605367756	605371189	4-hydroxy-tetrahydrodipicolinate synthase
	TRINITY_DN36096_c0_g2	-10.8004	2.56e-20	2.65e-18	DOWN	NA	NA	NA	NA	NA	NA	NA	NA	NA	NA	NA
	TRINITY_DN17976_c0_g1	-10.9178	2.6e-20	2.68e-18	DOWN	TRINITY_DN17976_c0_g1	TraesCS1B01G005400.1	1	282	282	6.98e-95	TraesCS1B01G005400	chr1B	3562921	3563202	Cyclotide
	TRINITY_DN29886_c0_g2	-10.8338	2.93e-20	3.01e-18	DOWN	TRINITY_DN29886_c0_g2	TraesCS7D01G543000.1	2491	2655	3327	1.82e-38	TraesCS7D01G543000	chr7D	631802574	631808462	RING/FYVE/PHD zinc finger protein
	TRINITY_DN18357_c0_g1	-10.734	3.1e-20	3.18e-18	DOWN	NA	NA	NA	NA	NA	NA	NA	NA	NA	NA	NA
	TRINITY_DN11110_c0_g2	-9.10002	3.62e-20	3.7e-18	DOWN	TRINITY_DN11110_c0_g2	TraesCS6D01G016700.1	1	323	732	1.07e-123	TraesCS6D01G016700	chr6D	6982174	6983479	Glutathione S-transferase
	TRINITY_DN17337_c0_g1	-10.7702	3.79e-20	3.87e-18	DOWN	NA	NA	NA	NA	NA	NA	NA	NA	NA	NA	NA
	TRINITY_DN13588_c1_g1	-10.7208	3.92e-20	3.99e-18	DOWN	NA	NA	NA	NA	NA	NA	NA	NA	NA	NA	NA
	TRINITY_DN10619_c0_g1	-12.9594	4.09e-20	4.14e-18	DOWN	TRINITY_DN10619_c0_g1	TraesCS3D01G215700.1	278	468	468	1.69e-96	TraesCS3D01G215700	chr3D	291975580	291976138	Translation initiation factor IF-2
	TRINITY_DN15984_c1_g1	-11.929	4.61e-20	4.64e-18	DOWN	NA	NA	NA	NA	NA	NA	NA	NA	NA	NA	NA
	TRINITY_DN237852_c0_g1	-12.0689	4.7e-20	4.72e-18	DOWN	TRINITY_DN237852_c0_g1	TraesCS3B01G004500.1	1	156	951	2.54e-75	TraesCS3B01G004500	chr3B	2507478	2508919	Isoflavone reductase-like protein
	TRINITY_DN66377_c1_g1	-10.7619	4.8e-20	4.82e-18	DOWN	TRINITY_DN66377_c1_g1	TraesCS2A01G036300.1	1091	1206	1206	1.01e-54	TraesCS2A01G036300	chr2A	15607548	15612726	3-ketoacyl-CoA thiolase
	TRINITY_DN26659_c0_g1	-10.9061	4.99e-20	4.99e-18	DOWN	TRINITY_DN26659_c0_g1	TraesCS7B01G320100.2	2257	2528	3072	6.02e-130	TraesCS7B01G320100	chr7B	570451059	570459602	Zinc-transporting ATPase
	TRINITY_DN18324_c0_g1	-10.7184	5.43e-20	5.41e-18	DOWN	NA	NA	NA	NA	NA	NA	NA	NA	NA	NA	NA
	TRINITY_DN11932_c0_g2	-6.46074	5.51e-20	5.48e-18	DOWN	TRINITY_DN11932_c0_g2	TraesCS5B01G414500.1	565	1095	1095	0	TraesCS5B01G414500	chr5B	588832720	588834700	Cinnamoyl CoA reductase
	TRINITY_DN22982_c0_g1	-10.7719	5.55e-20	5.52e-18	DOWN	TRINITY_DN22982_c0_g1	TraesCS2A01G036300.1	343	588	1206	6.96e-124	TraesCS2A01G036300	chr2A	15607548	15612726	3-ketoacyl-CoA thiolase
	TRINITY_DN15256_c0_g1	-11.0341	6.4e-20	6.31e-18	DOWN	TRINITY_DN15256_c0_g1	TraesCS7D01G442500.1	87	302	1113	6.23e-99	TraesCS7D01G442500	chr7D	561952526	561954979	transmembrane protein, putative (Protein of unknown function, DUF642)
	TRINITY_DN85296_c0_g1	-8.99898	6.64e-20	6.51e-18	DOWN	TRINITY_DN85296_c0_g1	TraesCS2B01G427900.1	88	1776	1776	0	TraesCS2B01G427900	chr2B	615340523	615343293	Sentrin-specific protease
	TRINITY_DN9911_c0_g4	-11.5737	6.66e-20	6.52e-18	DOWN	TRINITY_DN9911_c0_g4	TraesCS2A01G025700.1	1062	1185	1185	1.04e-57	TraesCS2A01G025700	chr2A	12101937	12103433	Chalcone synthase
	TRINITY_DN30091_c0_g2	-10.8112	7.5e-20	7.28e-18	DOWN	TRINITY_DN30091_c0_g2	TraesCS7A01G416800.1	1060	1104	1104	8.57e-14	TraesCS7A01G416800	chr7A	608674155	608677343	Type 1 membrane protein-like
	TRINITY_DN46170_c0_g1	-10.721	8.22e-20	7.95e-18	DOWN	TRINITY_DN46170_c0_g1	TraesCS3B01G086400.1	3254	3515	3822	4.39e-136	TraesCS3B01G086400	chr3B	54752105	54758652	E3 ubiquitin-protein ligase
	TRINITY_DN9160_c0_g2	-10.6599	8.26e-20	7.98e-18	DOWN	NA	NA	NA	NA	NA	NA	NA	NA	NA	NA	NA
	TRINITY_DN14236_c0_g2	-10.6558	8.52e-20	8.21e-18	DOWN	NA	NA	NA	NA	NA	NA	NA	NA	NA	NA	NA
	TRINITY_DN69172_c0_g3	-10.6554	8.56e-20	8.24e-18	DOWN	NA	NA	NA	NA	NA	NA	NA	NA	NA	NA	NA
	TRINITY_DN40433_c1_g5	-10.7418	9.93e-20	9.51e-18	DOWN	NA	NA	NA	NA	NA	NA	NA	NA	NA	NA	NA
	TRINITY_DN1875_c3_g1	-10.6883	1e-19	9.54e-18	DOWN	TRINITY_DN1875_c3_g1	TraesCS1D01G410000.1	96	169	324	6.3e-26	TraesCS1D01G410000	chr1D	471610395	471613206	Histidine-containing phosphotransfer protein
	TRINITY_DN2724_c0_g2	-10.7283	1.06e-19	1.01e-17	DOWN	TRINITY_DN2724_c0_g2	TraesCS2D01G531800.1	529	559	591	1.62e-07	TraesCS2D01G531800	chr2D	617405627	617406217	N-alpha-acetyltransferase
	TRINITY_DN15624_c0_g1	-11.2022	1.07e-19	1.02e-17	DOWN	TRINITY_DN15624_c0_g1	TraesCS2A01G010100.1	432	676	1266	2.51e-118	TraesCS2A01G010100	chr2A	3959490	3962611	Pyruvate dehydrogenase E1 component subunit alpha
	TRINITY_DN16324_c0_g1	-10.8365	1.12e-19	1.06e-17	DOWN	TRINITY_DN16324_c0_g1	TraesCS7B01G431600.1	497	774	1839	1.33e-121	TraesCS7B01G431600	chr7B	699840115	699843145	XH/XS domain-containing family protein
	TRINITY_DN41436_c0_g1	-5.61407	1.12e-19	1.06e-17	DOWN	TRINITY_DN41436_c0_g1	TraesCS7D01G418900.1	243	455	531	2.78e-100	TraesCS7D01G418900	chr7D	538586239	538586967	Xyloglucan endotransglucosylase/hydrolase
	TRINITY_DN23520_c1_g1	-10.6577	1.26e-19	1.18e-17	DOWN	TRINITY_DN23520_c1_g1	TraesCS5A01G152400.1	150	387	771	2.18e-107	TraesCS5A01G152400	chr5A	329378423	329380761	Ferritin
	TRINITY_DN59628_c1_g1	-10.7063	1.35e-19	1.26e-17	DOWN	NA	NA	NA	NA	NA	NA	NA	NA	NA	NA	NA
	TRINITY_DN44412_c0_g1	-10.8096	1.36e-19	1.26e-17	DOWN	TRINITY_DN44412_c0_g1	TraesCS5A01G506400.1	1	425	549	0	TraesCS5A01G506400	chr5A	671204269	671204817	Transposon protein, putative, Pong sub-class, expressed
	TRINITY_DN28027_c1_g1	-10.7197	1.38e-19	1.28e-17	DOWN	TRINITY_DN28027_c1_g1	TraesCS2B01G440400.1	1536	1412	1536	7.66e-60	TraesCS2B01G440400	chr2B	632404873	632409874	Aminotransferase
	TRINITY_DN18243_c1_g2	-10.6413	1.48e-19	1.38e-17	DOWN	TRINITY_DN18243_c1_g2	TraesCSU01G082200.1	942	1191	1200	1.26e-71	TraesCSU01G082200	chrUn	74853917	74855116	Transposon Ty3-G Gag-Pol polyprotein
	TRINITY_DN3349_c0_g4	-4.26359	1.57e-19	1.45e-17	DOWN	TRINITY_DN3349_c0_g4	TraesCS7D01G166100.1	1909	2921	2928	0	TraesCS7D01G166100	chr7D	116470622	116477479	Receptor protein kinase
	TRINITY_DN10384_c0_g1	-4.49486	1.7e-19	1.56e-17	DOWN	TRINITY_DN10384_c0_g1	TraesCS6D01G401500.1	1927	2100	2100	4e-87	TraesCS6D01G401500	chr6D	470625486	470630557	Mitochondrial intermediate peptidase
	TRINITY_DN68889_c3_g1	-4.07046	1.99e-19	1.82e-17	DOWN	TRINITY_DN68889_c3_g1	TraesCS1A01G369600.1	1213	937	1506	9.97e-143	TraesCS1A01G369600	chr1A	547298788	547303537	Methyltransferase
	TRINITY_DN36840_c0_g1	-10.6236	2.18e-19	1.98e-17	DOWN	TRINITY_DN36840_c0_g1	TraesCS2A01G033400.2	1	1536	1536	0	TraesCS2A01G033400	chr2A	14967453	14971984	Hfr-2-like protein
	TRINITY_DN23377_c0_g2	-10.6066	2.22e-19	2.01e-17	DOWN	TRINITY_DN23377_c0_g2	TraesCS7A01G415800.1	1165	1348	1365	2.04e-77	TraesCS7A01G415800	chr7A	608204211	608206223	MYB transcription factor
	TRINITY_DN36151_c0_g2	-10.705	2.26e-19	2.05e-17	DOWN	TRINITY_DN36151_c0_g2	TraesCS6B01G045000.1	1086	1188	1188	7.34e-46	TraesCS6B01G045000	chr6B	26840783	26841970	Mitochondrial transcription termination factor-like
	TRINITY_DN37040_c0_g1	-11.2279	2.26e-19	2.05e-17	DOWN	TRINITY_DN37040_c0_g1	TraesCS2D01G009100.1	1	375	1671	1.8e-158	TraesCS2D01G009100	chr2D	5086662	5089316	Major Facilitator Superfamily protein, expressed
	TRINITY_DN2333_c0_g2	-10.6101	2.28e-19	2.06e-17	DOWN	TRINITY_DN2333_c0_g2	TraesCS6D01G376800.2	225	1156	1218	1.02e-149	TraesCS6D01G376800	chr6D	459548212	459550608	S-adenosylmethionine synthase
	TRINITY_DN16158_c0_g1	-7.33666	2.31e-19	2.09e-17	DOWN	TRINITY_DN16158_c0_g1	TraesCS4A01G372100.1	1	3414	4290	0	TraesCS4A01G372100	chr4A	646775458	646788078	ABC transporter family protein
	TRINITY_DN44610_c0_g1	-10.6032	2.34e-19	2.11e-17	DOWN	TRINITY_DN44610_c0_g1	TraesCS7A01G229300.1	758	845	990	1.22e-32	TraesCS7A01G229300	chr7A	199438676	199441958	Cyclin
	TRINITY_DN8122_c1_g2	-10.6037	2.39e-19	2.15e-17	DOWN	NA	NA	NA	NA	NA	NA	NA	NA	NA	NA	NA
	TRINITY_DN30859_c1_g1	-10.6082	2.43e-19	2.18e-17	DOWN	TRINITY_DN30859_c1_g1	TraesCS7A01G466500.1	53	420	483	8.2e-135	TraesCS7A01G466500	chr7A	663496194	663498314	Polyubiquitin protein
	TRINITY_DN49587_c0_g2	-10.6931	2.51e-19	2.26e-17	DOWN	TRINITY_DN49587_c0_g2	TraesCS7B01G494500.1	32	599	2265	5.45e-100	TraesCS7B01G494500	chr7B	746046844	746054275	lectin-receptor kinase
	TRINITY_DN16651_c0_g1	-10.8553	2.57e-19	2.3e-17	DOWN	TRINITY_DN16651_c0_g1	TraesCS7B01G273800.1	1	245	1566	1.28e-121	TraesCS7B01G273800	chr7B	502908467	502910032	FAD-binding Berberine family protein
	TRINITY_DN9882_c1_g1	-5.94725	2.6e-19	2.33e-17	DOWN	TRINITY_DN9882_c1_g1	TraesCSU01G178100.1	1	1036	2745	0	TraesCSU01G178100	chrUn	268323877	268329732	Disease resistance protein (NBS-LRR class) family
	TRINITY_DN18772_c0_g1	-10.6278	2.62e-19	2.34e-17	DOWN	TRINITY_DN18772_c0_g1	TraesCS1B01G031600.1	1	102	1206	3.33e-40	TraesCS1B01G031600	chr1B	15448355	15451124	lysine ketoglutarate reductase trans-splicing protein (DUF707)
	TRINITY_DN57544_c0_g1	-10.6244	2.65e-19	2.36e-17	DOWN	NA	NA	NA	NA	NA	NA	NA	NA	NA	NA	NA
	TRINITY_DN124820_c2_g1	-10.7396	2.71e-19	2.41e-17	DOWN	NA	NA	NA	NA	NA	NA	NA	NA	NA	NA	NA
	TRINITY_DN10314_c0_g2	-10.944	2.82e-19	2.51e-17	DOWN	TRINITY_DN10314_c0_g2	TraesCS7A01G247400.1	41	579	579	0	TraesCS7A01G247400	chr7A	228031380	228032067	HAT family dimerization domain-containing protein
	TRINITY_DN16592_c0_g1	-10.5828	3.25e-19	2.88e-17	DOWN	NA	NA	NA	NA	NA	NA	NA	NA	NA	NA	NA
	TRINITY_DN24291_c0_g1	-10.5855	3.45e-19	3.05e-17	DOWN	TRINITY_DN24291_c0_g1	TraesCS1B01G390000.1	235	503	1950	5.81e-140	TraesCS1B01G390000	chr1B	623727410	623731515	Hexosyltransferase
	TRINITY_DN24091_c0_g1	-10.5895	3.62e-19	3.19e-17	DOWN	TRINITY_DN24091_c0_g1	TraesCS2B01G626100.1	1197	1350	1350	5.67e-66	TraesCS2B01G626100	chr2B	798590036	798591534	Protein NRT1/ PTR FAMILY 5.5
	TRINITY_DN13266_c0_g1	-10.691	3.72e-19	3.27e-17	DOWN	TRINITY_DN13266_c0_g1	TraesCS2D01G248900.1	121	229	909	1.25e-39	TraesCS2D01G248900	chr2D	293857899	293861174	Syntaxin
	TRINITY_DN5376_c0_g1	-12.7547	3.82e-19	3.35e-17	DOWN	TRINITY_DN5376_c0_g1	TraesCS1A01G415000.1	1	504	504	0	TraesCS1A01G415000	chr1A	574251732	574252310	Allergen, putative
	TRINITY_DN10855_c0_g1	-10.5753	3.86e-19	3.38e-17	DOWN	NA	NA	NA	NA	NA	NA	NA	NA	NA	NA	NA
	TRINITY_DN14817_c0_g1	-7.54762	3.89e-19	3.4e-17	DOWN	TRINITY_DN14817_c0_g1	TraesCS4B01G351700.1	1	1071	1071	0	TraesCS4B01G351700	chr4B	643665983	643667865	WAT1-related protein
	TRINITY_DN4244_c0_g1	-4.46689	4.39e-19	3.81e-17	DOWN	TRINITY_DN4244_c0_g1	TraesCS7B01G069800.1	1	2011	2928	0	TraesCS7B01G069800	chr7B	75152323	75159436	Receptor protein kinase
	TRINITY_DN5924_c2_g1	-5.15313	4.4e-19	3.82e-17	DOWN	TRINITY_DN5924_c2_g1	TraesCS1D01G326400.1	797	1423	1473	0	TraesCS1D01G326400	chr1D	419060735	419067889	Tyrosine-tRNA ligase
	TRINITY_DN85640_c0_g2	-10.5658	4.43e-19	3.84e-17	DOWN	TRINITY_DN85640_c0_g2	TraesCS7B01G489000.4	1	309	546	3.41e-135	TraesCS7B01G489000	chr7B	743299673	743301775	RNA-binding family protein
	TRINITY_DN42734_c0_g1	-10.5689	4.45e-19	3.85e-17	DOWN	TRINITY_DN42734_c0_g1	TraesCS1A01G076600.1	1	264	264	2.18e-106	TraesCS1A01G076600	chr1A	59215314	59215577	Transposon protein, putative, CACTA, En/Spm sub-class
	TRINITY_DN32647_c0_g1	-10.5679	5.12e-19	4.41e-17	DOWN	NA	NA	NA	NA	NA	NA	NA	NA	NA	NA	NA
	TRINITY_DN4628_c1_g2	-8.14031	5.48e-19	4.69e-17	DOWN	TRINITY_DN4628_c1_g2	TraesCS4A01G138900.1	27	136	864	4.73e-39	TraesCS4A01G138900	chr4A	207380491	207386843	Pectate lyase
	TRINITY_DN124434_c0_g1	-10.7789	5.68e-19	4.85e-17	DOWN	TRINITY_DN124434_c0_g1	TraesCS2A01G014300.1	1	195	654	3.14e-97	TraesCS2A01G014300	chr2A	5690317	5692857	Inosine-5'-monophosphate dehydrogenase
	TRINITY_DN12720_c0_g2	-10.6503	5.75e-19	4.9e-17	DOWN	NA	NA	NA	NA	NA	NA	NA	NA	NA	NA	NA
	TRINITY_DN178168_c0_g1	-10.665	6.38e-19	5.41e-17	DOWN	TRINITY_DN178168_c0_g1	TraesCS6A01G341500.1	1	179	216	2.89e-89	TraesCS6A01G341500	chr6A	574249221	574249521	alpha-adaptin
	TRINITY_DN110513_c0_g1	-10.8263	6.84e-19	5.78e-17	DOWN	NA	NA	NA	NA	NA	NA	NA	NA	NA	NA	NA
	TRINITY_DN43050_c0_g1	-10.7272	6.86e-19	5.79e-17	DOWN	NA	NA	NA	NA	NA	NA	NA	NA	NA	NA	NA
	TRINITY_DN3197_c0_g1	-11.7295	7.64e-19	6.41e-17	DOWN	NA	NA	NA	NA	NA	NA	NA	NA	NA	NA	NA
	TRINITY_DN13079_c0_g1	-10.5776	8e-19	6.7e-17	DOWN	TRINITY_DN13079_c0_g1	TraesCS7B01G492900.1	500	537	537	5.07e-09	TraesCS7B01G492900	chr7B	744648123	744652682	NBS-LRR disease resistance protein-like protein
	TRINITY_DN18701_c0_g2	-10.5245	9e-19	7.5e-17	DOWN	TRINITY_DN18701_c0_g2	TraesCS5D01G362600.1	918	1107	1107	2.88e-82	TraesCS5D01G362600	chr5D	441104295	441107200	Nicotinate-nucleotide pyrophosphorylase [carboxylating]
	TRINITY_DN9078_c0_g1	-5.54399	9.56e-19	7.94e-17	DOWN	TRINITY_DN9078_c0_g1	TraesCS7B01G250700.1	1	1062	1062	0	TraesCS7B01G250700	chr7B	462792976	462818895	GDSL esterase/lipase
	TRINITY_DN22241_c0_g1	-10.5166	9.98e-19	8.26e-17	DOWN	TRINITY_DN22241_c0_g1	TraesCS2B01G012900.1	1964	2031	2031	2.51e-28	TraesCS2B01G012900	chr2B	6310993	6316291	tRNA-dihydrouridine(47) synthase [NAD(P)(+)]
	TRINITY_DN224037_c0_g1	-10.5973	1e-18	8.29e-17	DOWN	TRINITY_DN224037_c0_g1	TraesCS2A01G564000.1	1487	1590	1590	4.68e-48	TraesCS2A01G564000	chr2A	764321984	764324786	E3 ubiquitin-protein ligase
	TRINITY_DN2849_c0_g2	-6.49648	1.04e-18	8.61e-17	DOWN	TRINITY_DN2849_c0_g2	TraesCS2B01G099700.1	2343	2549	3360	1.01e-96	TraesCS2B01G099700	chr2B	58987092	58997151	Syntaxin-binding protein 5-like protein
	TRINITY_DN12262_c0_g2	-7.43519	1.09e-18	8.99e-17	DOWN	NA	NA	NA	NA	NA	NA	NA	NA	NA	NA	NA
	TRINITY_DN19396_c0_g1	-10.5558	1.18e-18	9.64e-17	DOWN	TRINITY_DN19396_c0_g1	TraesCS7A01G422700.1	247	450	804	1.29e-90	TraesCS7A01G422700	chr7A	613176735	613177538	Zinc finger CCHC domain-containing protein 10
	TRINITY_DN39575_c0_g1	-10.726	1.2e-18	9.84e-17	DOWN	TRINITY_DN39575_c0_g1	TraesCS7A01G516000.1	3484	3516	3516	1.43e-08	TraesCS7A01G516000	chr7A	701291772	701304057	Isoleucine--tRNA ligase
	TRINITY_DN26312_c1_g1	-10.6172	1.22e-18	1e-16	DOWN	NA	NA	NA	NA	NA	NA	NA	NA	NA	NA	NA
	TRINITY_DN14228_c0_g1	-10.9662	1.26e-18	1.03e-16	DOWN	TRINITY_DN14228_c0_g1	TraesCS2A01G042100.1	410	656	1071	1.94e-124	TraesCS2A01G042100	chr2A	16881213	16888128	Phosphoglycerate mutase-like protein
	TRINITY_DN19708_c0_g1	-10.5347	1.26e-18	1.03e-16	DOWN	TRINITY_DN19708_c0_g1	TraesCS2D01G531400.1	1286	1514	1581	4.21e-61	TraesCS2D01G531400	chr2D	617212392	617221132	Serine protease htra2, putative
	TRINITY_DN5655_c0_g3	-11.4388	1.34e-18	1.09e-16	DOWN	TRINITY_DN5655_c0_g3	TraesCS6B01G015900.1	365	933	969	0	TraesCS6B01G015900	chr6B	9477940	9479012	BURP domain protein RD22
	TRINITY_DN14888_c2_g1	-10.6666	1.35e-18	1.1e-16	DOWN	TRINITY_DN14888_c2_g1	TraesCS7D01G039800.1	2210	2710	2751	6.47e-150	TraesCS7D01G039800	chr7D	20310877	20313627	NBS-LRR disease resistance protein, putative, expressed
	TRINITY_DN33478_c1_g1	-11.1823	1.37e-18	1.11e-16	DOWN	TRINITY_DN33478_c1_g1	TraesCS2A01G566700.1	1	48	1176	3.5e-17	TraesCS2A01G566700	chr2A	765761044	765762686	Kinase family protein
	TRINITY_DN58408_c0_g2	-7.78972	1.38e-18	1.11e-16	DOWN	NA	NA	NA	NA	NA	NA	NA	NA	NA	NA	NA
	TRINITY_DN34725_c3_g1	-10.5758	1.41e-18	1.14e-16	DOWN	TRINITY_DN34725_c3_g1	TraesCS7D01G438100.1	1358	1633	1863	3.69e-122	TraesCS7D01G438100	chr7D	557403460	557408792	External alternative NAD(P)H-ubiquinone oxidoreductase B2, mitochondrial
	TRINITY_DN50868_c1_g1	-10.6969	1.46e-18	1.18e-16	DOWN	TRINITY_DN50868_c1_g1	TraesCS3A01G074900.1	154	226	933	1.17e-27	TraesCS3A01G074900	chr3A	46729336	46732819	Steroid 5-alpha reductase
	TRINITY_DN83623_c0_g2	-5.4394	1.6e-18	1.28e-16	DOWN	TRINITY_DN83623_c0_g2	TraesCS1A01G367500.1	74	483	483	0	TraesCS1A01G367500	chr1A	546030545	546031776	FIZZY-related 3
	TRINITY_DN12721_c0_g1	-7.28547	1.61e-18	1.29e-16	DOWN	TRINITY_DN12721_c0_g1	TraesCS2B01G553500.1	839	972	972	4.89e-58	TraesCS2B01G553500	chr2B	748983604	748985680	translation initiation factor 3 subunit I
	TRINITY_DN29208_c0_g1	-5.7168	1.63e-18	1.3e-16	DOWN	TRINITY_DN29208_c0_g1	TraesCS3A01G276700.1	1907	1969	2409	9.95e-17	TraesCS3A01G276700	chr3A	506800050	506803985	Glutamate carboxypeptidase 2
	TRINITY_DN38596_c0_g1	-12.6749	1.87e-18	1.48e-16	DOWN	NA	NA	NA	NA	NA	NA	NA	NA	NA	NA	NA
	TRINITY_DN97058_c2_g1	-10.6115	1.92e-18	1.52e-16	DOWN	TRINITY_DN97058_c2_g1	TraesCS2A01G026700.1	639	873	1128	1.85e-119	TraesCS2A01G026700	chr2A	12289632	12291480	2-oxoglutarate (2OG) and Fe(II)-dependent oxygenase superfamily protein, putative
	TRINITY_DN18771_c0_g1	-10.515	1.99e-18	1.57e-16	DOWN	TRINITY_DN18771_c0_g1	TraesCS2A01G554500.1	296	526	615	3.15e-92	TraesCS2A01G554500	chr2A	759542939	759552126	DNA-directed RNA polymerase subunit beta
	TRINITY_DN32059_c0_g1	-10.4846	2.09e-18	1.64e-16	DOWN	TRINITY_DN32059_c0_g1	TraesCS7B01G433400.1	727	1028	1476	6.79e-120	TraesCS7B01G433400	chr7B	700826956	700828431	Amino acid transporter-like protein
	TRINITY_DN22590_c1_g1	-5.05697	2.13e-18	1.67e-16	DOWN	TRINITY_DN22590_c1_g1	TraesCS6A01G000600.1	1740	1651	1740	7.04e-34	TraesCS6A01G000600	chr6A	610157	615179	Protein disulfide-isomerase
	TRINITY_DN41244_c0_g1	-7.49446	2.23e-18	1.74e-16	DOWN	TRINITY_DN41244_c0_g1	TraesCS3D01G215600.1	1	277	591	5.98e-144	TraesCS3D01G215600	chr3D	291963173	291963872	Thionin-like protein 2
	TRINITY_DN57440_c1_g1	-10.5865	2.29e-18	1.79e-16	DOWN	TRINITY_DN57440_c1_g1	TraesCS7B01G371900.1	1144	1433	1680	6.4e-130	TraesCS7B01G371900	chr7B	637769054	637774747	Peptidyl-prolyl cis-trans isomerase-like protein
	TRINITY_DN49562_c0_g3	-10.7385	2.41e-18	1.87e-16	DOWN	TRINITY_DN49562_c0_g3	TraesCS3A01G046100.1	344	522	522	3.21e-85	TraesCS3A01G046100	chr3A	24678412	24679029	Trypsin inhibitor
	TRINITY_DN31823_c1_g1	-11.2303	2.65e-18	2.05e-16	DOWN	NA	NA	NA	NA	NA	NA	NA	NA	NA	NA	NA
	TRINITY_DN95752_c0_g1	-10.5139	2.68e-18	2.07e-16	DOWN	TRINITY_DN95752_c0_g1	TraesCS7B01G489700.2	1128	1634	1689	0	TraesCS7B01G489700	chr7B	743616728	743620219	Signal peptide peptidase-like protein
	TRINITY_DN34596_c0_g1	-10.4537	2.85e-18	2.2e-16	DOWN	TRINITY_DN34596_c0_g1	TraesCS6D01G201200.1	487	569	570	2e-24	TraesCS6D01G201200	chr6D	283301159	283304178	Glutathione reductase
	TRINITY_DN18827_c0_g1	-10.9427	3.15e-18	2.41e-16	DOWN	NA	NA	NA	NA	NA	NA	NA	NA	NA	NA	NA
	TRINITY_DN17007_c0_g1	-10.7902	3.25e-18	2.48e-16	DOWN	TRINITY_DN17007_c0_g1	TraesCS2D01G512900.1	1270	1508	1983	1.62e-121	TraesCS2D01G512900	chr2D	604287559	604292123	Serine/threonine-protein kinase
	TRINITY_DN52209_c0_g2	-10.4461	3.34e-18	2.55e-16	DOWN	NA	NA	NA	NA	NA	NA	NA	NA	NA	NA	NA
	TRINITY_DN45134_c0_g1	-10.457	3.82e-18	2.9e-16	DOWN	TRINITY_DN45134_c0_g1	TraesCS7B01G380800.1	1	418	1698	0	TraesCS7B01G380800	chr7B	645397875	645399572	Polypyrimidine tract-binding protein
	TRINITY_DN63366_c3_g1	-10.5215	4.03e-18	3.05e-16	DOWN	TRINITY_DN63366_c3_g1	TraesCS6A01G202900.1	41	315	795	2.75e-143	TraesCS6A01G202900	chr6A	340906089	340919852	Cytochrome b-c1 complex subunit Rieske, mitochondrial
	TRINITY_DN22508_c0_g1	-10.447	4.19e-18	3.16e-16	DOWN	TRINITY_DN22508_c0_g1	TraesCS7B01G293500.2	800	1090	1347	8.35e-134	TraesCS7B01G293500	chr7B	530379677	530381853	Amino acid transporter-like protein
	TRINITY_DN19045_c0_g1	-10.4837	4.46e-18	3.36e-16	DOWN	NA	NA	NA	NA	NA	NA	NA	NA	NA	NA	NA
	TRINITY_DN8042_c1_g1	-10.4322	4.5e-18	3.39e-16	DOWN	NA	NA	NA	NA	NA	NA	NA	NA	NA	NA	NA
	TRINITY_DN51767_c0_g1	-10.8018	4.55e-18	3.42e-16	DOWN	TRINITY_DN51767_c0_g1	TraesCS5A01G557100.1	510	357	510	8.96e-73	TraesCS5A01G557100	chr5A	708183055	708184124	2-oxoglutarate (2OG) and Fe(II)-dependent oxygenase superfamily protein, putative
	TRINITY_DN33902_c0_g1	-10.5701	4.64e-18	3.48e-16	DOWN	TRINITY_DN33902_c0_g1	TraesCS4A01G074200.2	1247	1486	1836	4.09e-85	TraesCS4A01G074200	chr4A	73450420	73455153	Microtubule associated protein family protein, putative, expressed
	TRINITY_DN23328_c0_g1	-6.55081	4.9e-18	3.67e-16	DOWN	TRINITY_DN23328_c0_g1	TraesCS2B01G185200.1	522	1162	1224	0	TraesCS2B01G185200	chr2B	160280778	160282853	Patatin
	TRINITY_DN193197_c0_g1	-10.5608	5.12e-18	3.82e-16	DOWN	NA	NA	NA	NA	NA	NA	NA	NA	NA	NA	NA
	TRINITY_DN27539_c0_g1	-10.5608	5.12e-18	3.82e-16	DOWN	TRINITY_DN27539_c0_g1	TraesCS7D01G382100.1	676	786	786	1.92e-45	TraesCS7D01G382100	chr7D	495855387	495859510	SNARE
	TRINITY_DN24775_c1_g1	-11.7262	5.2e-18	3.87e-16	DOWN	TRINITY_DN24775_c1_g1	TraesCS2A01G007500.1	1347	1618	1707	5.88e-140	TraesCS2A01G007500	chr2A	3333360	3335912	Major Facilitator Superfamily protein, expressed
	TRINITY_DN2178_c1_g1	-11.7161	5.41e-18	4.02e-16	DOWN	TRINITY_DN2178_c1_g1	TraesCS7B01G393200.1	1	1098	1098	0	TraesCS7B01G393200	chr7B	659957575	659960089	WAT1-related protein
	TRINITY_DN20960_c0_g1	-10.617	5.51e-18	4.09e-16	DOWN	NA	NA	NA	NA	NA	NA	NA	NA	NA	NA	NA
	TRINITY_DN23029_c0_g1	-10.9353	5.72e-18	4.23e-16	DOWN	TRINITY_DN23029_c0_g1	TraesCS6A01G401500.1	729	504	957	3.83e-116	TraesCS6A01G401500	chr6A	609972318	609973926	Mesoderm induction early response protein 1, putative isoform 1
	TRINITY_DN109652_c0_g1	-10.4612	6.47e-18	4.76e-16	DOWN	NA	NA	NA	NA	NA	NA	NA	NA	NA	NA	NA
	TRINITY_DN48275_c0_g1	-6.67887	6.62e-18	4.87e-16	DOWN	NA	NA	NA	NA	NA	NA	NA	NA	NA	NA	NA
	TRINITY_DN21197_c0_g2	-10.4032	6.7e-18	4.92e-16	DOWN	TRINITY_DN21197_c0_g2	TraesCS2A01G584100.1	263	329	792	7.04e-26	TraesCS2A01G584100	chr2A	775617006	775620626	1D-myo-inositol 2-acetamido-2-deoxy-alpha-D-glucopyranoside deacetylase
	TRINITY_DN13060_c0_g1	-5.7005	6.82e-18	5e-16	DOWN	TRINITY_DN13060_c0_g1	TraesCS1D01G370700.1	482	1260	1260	0	TraesCS1D01G370700	chr1D	449281806	449283805	Pectin lyase-like superfamily protein
	TRINITY_DN53005_c0_g1	-10.4162	7.03e-18	5.14e-16	DOWN	TRINITY_DN53005_c0_g1	TraesCS2B01G558400.1	188	231	1197	7.19e-15	TraesCS2B01G558400	chr2B	752785199	752787787	Chalcone synthase
	TRINITY_DN15579_c1_g2	-10.3975	7.37e-18	5.37e-16	DOWN	TRINITY_DN15579_c1_g2	TraesCS7A01G047500.1	1	563	906	0	TraesCS7A01G047500	chr7A	21514000	21514905	Segregation and condensation protein A
	TRINITY_DN39458_c0_g1	-10.9765	7.97e-18	5.79e-16	DOWN	NA	NA	NA	NA	NA	NA	NA	NA	NA	NA	NA
	TRINITY_DN57001_c0_g2	-4.10606	8.07e-18	5.85e-16	DOWN	NA	NA	NA	NA	NA	NA	NA	NA	NA	NA	NA
	TRINITY_DN46012_c0_g1	-10.5749	8.13e-18	5.89e-16	DOWN	TRINITY_DN46012_c0_g1	TraesCS2A01G568200.1	801	1024	1494	4.91e-115	TraesCS2A01G568200	chr2A	766701553	766707886	Zinc finger protein ZPR1
	TRINITY_DN27772_c1_g1	-11.2137	8.14e-18	5.9e-16	DOWN	TRINITY_DN27772_c1_g1	TraesCS6B01G015900.1	874	969	969	1.1e-43	TraesCS6B01G015900	chr6B	9477940	9479012	BURP domain protein RD22
	TRINITY_DN26730_c0_g2	-10.4826	8.45e-18	6.11e-16	DOWN	NA	NA	NA	NA	NA	NA	NA	NA	NA	NA	NA
	TRINITY_DN71330_c0_g1	-5.25426	8.67e-18	6.26e-16	DOWN	TRINITY_DN71330_c0_g1	TraesCSU01G101000.1	372	627	627	4.68e-106	TraesCSU01G101000	chrUn	88995570	88998370	Clathrin light chain
	TRINITY_DN48513_c0_g2	-10.4022	8.71e-18	6.28e-16	DOWN	NA	NA	NA	NA	NA	NA	NA	NA	NA	NA	NA
	TRINITY_DN51916_c0_g1	-10.5687	9.08e-18	6.53e-16	DOWN	TRINITY_DN51916_c0_g1	TraesCS7D01G543800.2	1	237	984	1.42e-81	TraesCS7D01G543800	chr7D	632006995	632008533	Chloroplast protein
	TRINITY_DN3063_c2_g2	-10.701	9.2e-18	6.61e-16	DOWN	TRINITY_DN3063_c2_g2	TraesCS4A01G031400.1	249	1	1494	3.07e-125	TraesCS4A01G031400	chr4A	24556144	24557637	WUS-interacting protein 2
	TRINITY_DN201409_c0_g1	-10.4793	9.99e-18	7.14e-16	DOWN	NA	NA	NA	NA	NA	NA	NA	NA	NA	NA	NA
	TRINITY_DN16108_c0_g4	-10.3851	1.09e-17	7.74e-16	DOWN	NA	NA	NA	NA	NA	NA	NA	NA	NA	NA	NA
	TRINITY_DN42484_c0_g1	-10.5038	1.14e-17	8.06e-16	DOWN	TRINITY_DN42484_c0_g1	TraesCS7A01G326400.1	589	737	1371	4.25e-58	TraesCS7A01G326400	chr7A	474295969	474297884	Tubby-like F-box protein
	TRINITY_DN18689_c0_g1	-10.9737	1.17e-17	8.29e-16	DOWN	TRINITY_DN18689_c0_g1	TraesCS6D01G028200.1	6497	6544	6546	4.04e-17	TraesCS6D01G028200	chr6D	10905872	10913503	U5 small nuclear ribonucleoprotein helicase
	TRINITY_DN17272_c0_g1	-10.6647	1.18e-17	8.33e-16	DOWN	NA	NA	NA	NA	NA	NA	NA	NA	NA	NA	NA
	TRINITY_DN65135_c0_g1	-10.4408	1.19e-17	8.38e-16	DOWN	NA	NA	NA	NA	NA	NA	NA	NA	NA	NA	NA
	TRINITY_DN18587_c0_g3	-7.12125	1.22e-17	8.59e-16	DOWN	NA	NA	NA	NA	NA	NA	NA	NA	NA	NA	NA
	TRINITY_DN45126_c0_g1	-10.3963	1.22e-17	8.61e-16	DOWN	NA	NA	NA	NA	NA	NA	NA	NA	NA	NA	NA
	TRINITY_DN18341_c0_g1	-10.3877	1.25e-17	8.81e-16	DOWN	TRINITY_DN18341_c0_g1	TraesCS7B01G273800.1	584	1211	1566	0	TraesCS7B01G273800	chr7B	502908467	502910032	FAD-binding Berberine family protein
	TRINITY_DN57509_c0_g1	-10.4815	1.3e-17	9.12e-16	DOWN	TRINITY_DN57509_c0_g1	TraesCS7B01G323100.1	730	804	804	1.61e-30	TraesCS7B01G323100	chr7B	573922927	573923730	Zinc finger CCHC domain-containing protein 10
	TRINITY_DN25703_c0_g2	-7.28779	1.43e-17	1e-15	DOWN	NA	NA	NA	NA	NA	NA	NA	NA	NA	NA	NA
	TRINITY_DN21743_c0_g2	-6.68526	1.49e-17	1.04e-15	DOWN	TRINITY_DN21743_c0_g2	TraesCS5A01G116200.1	140	222	222	5.17e-26	TraesCS5A01G116200	chr5A	237953442	237953745	Alkyldihydroxyacetonephosphate synthase, peroxisomal
	TRINITY_DN20929_c1_g1	-10.4769	1.52e-17	1.06e-15	DOWN	TRINITY_DN20929_c1_g1	TraesCS2A01G511900.1	782	1098	1098	1.4e-129	TraesCS2A01G511900	chr2A	736546753	736549351	4-hydroxy-tetrahydrodipicolinate synthase
	TRINITY_DN24831_c0_g1	-6.29123	1.54e-17	1.07e-15	DOWN	TRINITY_DN24831_c0_g1	TraesCS7A01G544700.1	5472	6471	6471	0	TraesCS7A01G544700	chr7A	721094163	721106198	DNA helicase
	TRINITY_DN28625_c0_g1	-6.99512	1.55e-17	1.08e-15	DOWN	TRINITY_DN28625_c0_g1	TraesCS5D01G566700.1	1	1076	1212	0	TraesCS5D01G566700	chr5D	564929124	564932658	GDSL esterase/lipase
	TRINITY_DN25941_c1_g1	-10.6407	1.57e-17	1.09e-15	DOWN	TRINITY_DN25941_c1_g1	TraesCS3D01G012500.1	814	1985	3120	0	TraesCS3D01G012500	chr3D	4356776	4361959	NBS-LRR-like resistance protein
	TRINITY_DN58113_c0_g1	-10.6092	1.62e-17	1.12e-15	DOWN	TRINITY_DN58113_c0_g1	TraesCS3A01G366300.1	210	474	2499	9.57e-138	TraesCS3A01G366300	chr3A	615274530	615280362	Alpha-1,4 glucan phosphorylase
	TRINITY_DN5924_c2_g3	-5.85259	1.7e-17	1.17e-15	DOWN	TRINITY_DN5924_c2_g3	TraesCS1D01G326400.2	1149	1260	1260	1.56e-45	TraesCS1D01G326400	chr1D	419060735	419067889	Tyrosine-tRNA ligase
	TRINITY_DN51566_c0_g2	-10.3791	1.76e-17	1.21e-15	DOWN	TRINITY_DN51566_c0_g2	TraesCS2B01G341000.1	730	834	837	2.57e-23	TraesCS2B01G341000	chr2B	486741513	486751428	Aldose 1-epimerase
	TRINITY_DN28693_c0_g2	-10.3415	1.79e-17	1.23e-15	DOWN	TRINITY_DN28693_c0_g2	TraesCS1A01G026400.1	2427	2205	2610	2.02e-94	TraesCS1A01G026400	chr1A	12586749	12590845	Disease resistance protein (NBS-LRR class) family
	TRINITY_DN79270_c0_g1	-10.3419	1.8e-17	1.24e-15	DOWN	TRINITY_DN79270_c0_g1	TraesCS5A01G107100.1	68	253	288	6.35e-76	TraesCS5A01G107100	chr5A	180347402	180347689	kinesin 3
	TRINITY_DN9296_c0_g1	-14.0033	1.88e-17	1.29e-15	DOWN	TRINITY_DN9296_c0_g1	TraesCS3B01G371800.1	1553	1671	1671	2.28e-56	TraesCS3B01G371800	chr3B	584575221	584577088	L-ascorbate oxidase-like protein
	TRINITY_DN8290_c1_g1	-5.29783	1.89e-17	1.29e-15	DOWN	TRINITY_DN8290_c1_g1	TraesCS2A01G584200.1	1	194	234	1.16e-86	TraesCS2A01G584200	chr2A	775658910	775659246	Ozone-responsive stress related protein
	TRINITY_DN20362_c0_g1	-10.3399	1.9e-17	1.3e-15	DOWN	TRINITY_DN20362_c0_g1	TraesCS4A01G492700.1	539	581	675	1.97e-08	TraesCS4A01G492700	chr4A	741588190	741588864	Glutaredoxin family protein, expressed
	TRINITY_DN61103_c0_g1	-10.3692	1.92e-17	1.31e-15	DOWN	TRINITY_DN61103_c0_g1	TraesCS7B01G454600.1	1309	1455	2373	3.01e-45	TraesCS7B01G454600	chr7B	715251865	715259121	ARM repeat superfamily protein
	TRINITY_DN23112_c0_g1	-10.364	1.94e-17	1.32e-15	DOWN	NA	NA	NA	NA	NA	NA	NA	NA	NA	NA	NA
	TRINITY_DN25980_c0_g1	-10.4287	1.97e-17	1.34e-15	DOWN	NA	NA	NA	NA	NA	NA	NA	NA	NA	NA	NA
	TRINITY_DN40809_c0_g1	-10.474	2.05e-17	1.4e-15	DOWN	NA	NA	NA	NA	NA	NA	NA	NA	NA	NA	NA
	TRINITY_DN28740_c0_g1	-10.3486	2.1e-17	1.43e-15	DOWN	TRINITY_DN28740_c0_g1	TraesCS7A01G040100.1	456	729	729	1.1e-132	TraesCS7A01G040100	chr7A	18101646	18103326	HAT transposon superfamily
	TRINITY_DN20918_c0_g1	-10.3315	2.15e-17	1.46e-15	DOWN	NA	NA	NA	NA	NA	NA	NA	NA	NA	NA	NA
	TRINITY_DN12733_c0_g1	-10.7105	2.18e-17	1.48e-15	DOWN	TRINITY_DN12733_c0_g1	TraesCS2D01G116200.1	1281	1367	1575	2.85e-13	TraesCS2D01G116200	chr2D	64731844	64733709	Small ribosomal subunit biogenesis GTPase RsgA
	TRINITY_DN4590_c0_g1	-4.10607	2.34e-17	1.59e-15	DOWN	TRINITY_DN4590_c0_g1	TraesCS7B01G310600.1	1	357	357	1.84e-168	TraesCS7B01G310600	chr7B	555655843	555657277	Leucine-rich repeat transmembrane neuronal protein 1
	TRINITY_DN29439_c0_g1	-10.5977	2.37e-17	1.6e-15	DOWN	TRINITY_DN29439_c0_g1	TraesCS5B01G359500.1	1403	1632	2094	5.21e-105	TraesCS5B01G359500	chr5B	539292231	539294869	Octicosapeptide/Phox/Bem1p domain-containing protein / tetratricopeptide repeat-containing protein
	TRINITY_DN24914_c0_g1	-7.03363	2.61e-17	1.76e-15	DOWN	TRINITY_DN24914_c0_g1	TraesCS3A01G399100.1	1	1374	1374	0	TraesCS3A01G399100	chr3A	646136736	646142561	Lipase
	TRINITY_DN155855_c0_g1	-10.3409	2.62e-17	1.76e-15	DOWN	NA	NA	NA	NA	NA	NA	NA	NA	NA	NA	NA
	TRINITY_DN59947_c0_g1	-11.2438	2.63e-17	1.77e-15	DOWN	TRINITY_DN59947_c0_g1	TraesCS7B01G280700.1	1248	1434	1434	8.31e-83	TraesCS7B01G280700	chr7B	513725083	513730513	Polyamine oxidase
	TRINITY_DN23861_c0_g1	-10.3995	2.68e-17	1.8e-15	DOWN	NA	NA	NA	NA	NA	NA	NA	NA	NA	NA	NA
	TRINITY_DN15209_c1_g1	-10.317	2.74e-17	1.84e-15	DOWN	TRINITY_DN15209_c1_g1	TraesCS7A01G419900.1	1023	1113	1113	2.94e-37	TraesCS7A01G419900	chr7A	611488421	611494157	Core-2/I-branching beta-1,6-N-acetylglucosaminyltransferase family protein
	TRINITY_DN25276_c0_g1	-10.317	2.74e-17	1.84e-15	DOWN	NA	NA	NA	NA	NA	NA	NA	NA	NA	NA	NA
	TRINITY_DN88300_c0_g2	-10.3174	2.83e-17	1.89e-15	DOWN	NA	NA	NA	NA	NA	NA	NA	NA	NA	NA	NA
	TRINITY_DN33859_c0_g1	-10.7373	2.9e-17	1.93e-15	DOWN	TRINITY_DN33859_c0_g1	TraesCS7A01G503100.1	1	250	744	2.4e-124	TraesCS7A01G503100	chr7A	692054604	692056497	Bidirectional sugar transporter SWEET
	TRINITY_DN12828_c0_g3	-10.6963	3.16e-17	2.1e-15	DOWN	NA	NA	NA	NA	NA	NA	NA	NA	NA	NA	NA
	TRINITY_DN36474_c1_g1	-10.3331	3.28e-17	2.17e-15	DOWN	TRINITY_DN36474_c1_g1	TraesCS7B01G481800.1	1562	1843	2190	3.63e-147	TraesCS7B01G481800	chr7B	739382658	739386654	Chloroplastic group IIA intron splicing facilitator CRS1, chloroplastic
	TRINITY_DN6206_c0_g3	-10.4579	3.4e-17	2.24e-15	DOWN	TRINITY_DN6206_c0_g3	TraesCS7B01G306500.1	615	303	615	5.54e-161	TraesCS7B01G306500	chr7B	549930629	549931243	Plant invertase/pectin methylesterase inhibitor superfamily protein
	TRINITY_DN41431_c0_g1	-12.0752	3.47e-17	2.28e-15	DOWN	TRINITY_DN41431_c0_g1	TraesCS7D01G404900.1	515	771	1581	5.68e-120	TraesCS7D01G404900	chr7D	522502519	522504208	Flavonoid 3'-hydroxylase
	TRINITY_DN22097_c0_g2	-10.3472	3.51e-17	2.3e-15	DOWN	TRINITY_DN22097_c0_g2	TraesCS3B01G256900.1	1	277	855	1.66e-142	TraesCS3B01G256900	chr3B	414210405	414213374	RING finger protein
	TRINITY_DN9264_c0_g1	-10.4963	3.68e-17	2.4e-15	DOWN	TRINITY_DN9264_c0_g1	TraesCS2B01G581700.1	966	1002	1002	1.69e-10	TraesCS2B01G581700	chr2B	769076767	769083033	Histone H2A deubiquitinase (DUF3755)
	TRINITY_DN29523_c0_g1	-10.3744	3.82e-17	2.5e-15	DOWN	TRINITY_DN29523_c0_g1	TraesCS2A01G017100.1	865	1064	1227	1e-96	TraesCS2A01G017100	chr2A	7919298	7921741	NADH-quinone oxidoreductase subunit F
	TRINITY_DN2755_c1_g1	-10.3239	3.82e-17	2.5e-15	DOWN	NA	NA	NA	NA	NA	NA	NA	NA	NA	NA	NA
	TRINITY_DN51152_c0_g2	-10.3323	3.94e-17	2.56e-15	DOWN	NA	NA	NA	NA	NA	NA	NA	NA	NA	NA	NA
	TRINITY_DN6130_c2_g1	-10.2883	4.15e-17	2.69e-15	DOWN	TRINITY_DN6130_c2_g1	TraesCS2A01G012200.1	397	618	3111	6.32e-114	TraesCS2A01G012200	chr2A	4786628	4793590	Protein transport Sec24-like protein
	TRINITY_DN16060_c0_g1	-5.48504	4.55e-17	2.94e-15	DOWN	TRINITY_DN16060_c0_g1	TraesCS6A01G044600.1	946	1085	1161	2.59e-53	TraesCS6A01G044600	chr6A	23355685	23358223	Loricrin-like
	TRINITY_DN40059_c0_g1	-10.3006	4.7e-17	3.03e-15	DOWN	TRINITY_DN40059_c0_g1	TraesCS2B01G628600.1	872	1090	1407	2.88e-112	TraesCS2B01G628600	chr2B	800029664	800035949	Zinc finger protein ZPR1
	TRINITY_DN14173_c2_g2	-10.2788	4.85e-17	3.11e-15	DOWN	NA	NA	NA	NA	NA	NA	NA	NA	NA	NA	NA
	TRINITY_DN1660_c0_g2	-7.19254	4.91e-17	3.14e-15	DOWN	NA	NA	NA	NA	NA	NA	NA	NA	NA	NA	NA
	TRINITY_DN7613_c0_g1	-10.4785	5.16e-17	3.3e-15	DOWN	TRINITY_DN7613_c0_g1	TraesCS7A01G562700.1	499	567	567	7.51e-27	TraesCS7A01G562700	chr7A	733337850	733339850	Coiled-coil domain-containing protein 12
	TRINITY_DN47907_c0_g1	-10.3255	5.31e-17	3.39e-15	DOWN	NA	NA	NA	NA	NA	NA	NA	NA	NA	NA	NA
	TRINITY_DN26416_c0_g2	-10.5409	5.51e-17	3.5e-15	DOWN	TRINITY_DN26416_c0_g2	TraesCS7D01G500700.1	1364	1639	2118	7.79e-134	TraesCS7D01G500700	chr7D	606824085	606826202	Receptor-like kinase
	TRINITY_DN79641_c3_g1	-10.2822	5.55e-17	3.53e-15	DOWN	NA	NA	NA	NA	NA	NA	NA	NA	NA	NA	NA
	TRINITY_DN13365_c1_g2	-10.3137	5.58e-17	3.54e-15	DOWN	TRINITY_DN13365_c1_g2	TraesCS7A01G044300.2	2371	2620	2748	3.17e-127	TraesCS7A01G044300	chr7A	20482829	20485783	NBS-LRR disease resistance protein, putative, expressed
	TRINITY_DN8084_c0_g3	-11.2548	5.72e-17	3.62e-15	DOWN	TRINITY_DN8084_c0_g3	TraesCS2A01G006800.1	4112	4417	4434	2.81e-100	TraesCS2A01G006800	chr2A	2915312	2919745	Disease resistance protein (NBS-LRR class) family
	TRINITY_DN25048_c1_g2	-11.42	6.46e-17	4.06e-15	DOWN	TRINITY_DN25048_c1_g2	TraesCS6D01G016700.1	440	196	732	4.73e-81	TraesCS6D01G016700	chr6D	6982174	6983479	Glutathione S-transferase
	TRINITY_DN12132_c0_g3	-7.89978	6.48e-17	4.08e-15	DOWN	TRINITY_DN12132_c0_g3	TraesCSU01G064500.1	1	635	651	2.14e-111	TraesCSU01G064500	chrUn	50626052	50626702	Disease resistance protein (TIR-NBS-LRR class) family
	TRINITY_DN59383_c0_g1	-10.2953	6.76e-17	4.23e-15	DOWN	NA	NA	NA	NA	NA	NA	NA	NA	NA	NA	NA
	TRINITY_DN28590_c0_g1	-10.2547	6.92e-17	4.32e-15	DOWN	NA	NA	NA	NA	NA	NA	NA	NA	NA	NA	NA
	TRINITY_DN118869_c1_g1	-11.0386	7.24e-17	4.51e-15	DOWN	TRINITY_DN118869_c1_g1	TraesCS7D01G452000.1	1061	1206	1260	3.36e-68	TraesCS7D01G452000	chr7D	571812764	571814470	Patatin
	TRINITY_DN71443_c0_g1	-10.3726	7.26e-17	4.52e-15	DOWN	NA	NA	NA	NA	NA	NA	NA	NA	NA	NA	NA
	TRINITY_DN13365_c1_g4	-10.315	7.68e-17	4.77e-15	DOWN	TRINITY_DN13365_c1_g4	TraesCS7A01G046000.1	2354	2748	2748	8.74e-128	TraesCS7A01G046000	chr7A	20910716	20913463	NBS-LRR disease resistance protein, putative, expressed
	TRINITY_DN89756_c0_g1	-11.8471	7.79e-17	4.84e-15	DOWN	TRINITY_DN89756_c0_g1	TraesCS6B01G015900.1	1	327	969	2.23e-170	TraesCS6B01G015900	chr6B	9477940	9479012	BURP domain protein RD22
	TRINITY_DN24025_c0_g1	-10.417	7.83e-17	4.85e-15	DOWN	TRINITY_DN24025_c0_g1	TraesCS5A01G097100.1	1026	1256	2094	1.67e-94	TraesCS5A01G097100	chr5A	137276077	137279207	Protein VERNALIZATION INSENSITIVE 3
	TRINITY_DN3076_c0_g3	-10.2951	7.86e-17	4.87e-15	DOWN	TRINITY_DN3076_c0_g3	TraesCS5A01G177000.1	1	243	243	1.41e-101	TraesCS5A01G177000	chr5A	374023059	374023446	Nuclease S1
	TRINITY_DN48678_c0_g1	-10.2423	8.64e-17	5.31e-15	DOWN	TRINITY_DN48678_c0_g1	TraesCS1B01G051400.1	1112	1255	1554	6.82e-64	TraesCS1B01G051400	chr1B	31372728	31376658	Transposon protein, putative, CACTA, En/Spm sub-class
	TRINITY_DN18823_c0_g1	-10.2391	8.75e-17	5.36e-15	DOWN	NA	NA	NA	NA	NA	NA	NA	NA	NA	NA	NA
	TRINITY_DN43277_c0_g2	-7.76903	8.96e-17	5.49e-15	DOWN	TRINITY_DN43277_c0_g2	TraesCS7D01G011800.1	1397	1716	1716	6.46e-130	TraesCS7D01G011800	chr7D	5179420	5185825	Receptor-like protein kinase
	TRINITY_DN219401_c0_g1	-10.3779	9.44e-17	5.76e-15	DOWN	TRINITY_DN219401_c0_g1	TraesCS7D01G464500.1	1434	1396	1434	8.12e-10	TraesCS7D01G464500	chr7D	579048886	579051227	FBD-associated F-box protein
	TRINITY_DN17910_c0_g2	-10.2476	9.84e-17	5.99e-15	DOWN	TRINITY_DN17910_c0_g2	TraesCS2A01G554500.1	471	615	615	1.05e-50	TraesCS2A01G554500	chr2A	759542939	759552126	DNA-directed RNA polymerase subunit beta
	TRINITY_DN15632_c0_g1	-10.2798	9.86e-17	6e-15	DOWN	TRINITY_DN15632_c0_g1	TraesCS6B01G437100.1	1118	1452	1452	1.39e-164	TraesCS6B01G437100	chr6B	704303211	704304896	F-box/RNI-like/FBD-like domains-containing protein
	TRINITY_DN33893_c0_g1	-10.4899	1.02e-16	6.19e-15	DOWN	TRINITY_DN33893_c0_g1	TraesCS2A01G007800.1	874	1088	2022	2.2e-108	TraesCS2A01G007800	chr2A	3442409	3447453	tRNA-dihydrouridine(47) synthase [NAD(P)(+)]
	TRINITY_DN224_c2_g1	-10.3639	1.04e-16	6.33e-15	DOWN	NA	NA	NA	NA	NA	NA	NA	NA	NA	NA	NA
	TRINITY_DN31292_c0_g1	-5.1199	1.06e-16	6.4e-15	DOWN	TRINITY_DN31292_c0_g1	TraesCS2A01G010100.1	988	1266	1266	8.44e-127	TraesCS2A01G010100	chr2A	3959490	3962611	Pyruvate dehydrogenase E1 component subunit alpha
	TRINITY_DN31207_c0_g1	-10.227	1.08e-16	6.55e-15	DOWN	NA	NA	NA	NA	NA	NA	NA	NA	NA	NA	NA
	TRINITY_DN22961_c0_g1	-5.85726	1.15e-16	6.94e-15	DOWN	TRINITY_DN22961_c0_g1	TraesCS2D01G503000.1	313	536	2856	4.95e-110	TraesCS2D01G503000	chr2D	596911685	596917454	Plasma membrane ATPase
	TRINITY_DN19565_c0_g2	-7.75069	1.19e-16	7.13e-15	DOWN	NA	NA	NA	NA	NA	NA	NA	NA	NA	NA	NA
	TRINITY_DN24986_c0_g1	-10.2194	1.19e-16	7.13e-15	DOWN	TRINITY_DN24986_c0_g1	TraesCS6A01G089000.1	452	548	1002	1.58e-27	TraesCS6A01G089000	chr6A	57680902	57684078	Ribosome biogenesis regulatory protein-like protein
	TRINITY_DN25795_c1_g1	-10.2281	1.25e-16	7.49e-15	DOWN	TRINITY_DN25795_c1_g1	TraesCS6D01G390600.1	1540	1656	1656	9.35e-43	TraesCS6D01G390600	chr6D	465742668	465745084	F-box family protein
	TRINITY_DN22536_c0_g1	-10.2157	1.28e-16	7.64e-15	DOWN	TRINITY_DN22536_c0_g1	TraesCS6B01G136600.1	1577	1799	1932	4.52e-101	TraesCS6B01G136600	chr6B	133998313	134000436	Leucine-rich repeat protein kinase family protein
	TRINITY_DN32541_c0_g1	-10.2562	1.29e-16	7.7e-15	DOWN	TRINITY_DN32541_c0_g1	TraesCS6D01G028400.1	2990	3349	3945	2.24e-130	TraesCS6D01G028400	chr6D	10938361	10946173	Disease resistance protein RPM1
	TRINITY_DN35923_c0_g1	-6.77703	1.3e-16	7.75e-15	DOWN	TRINITY_DN35923_c0_g1	TraesCS7D01G374600.1	131	532	1146	2.41e-175	TraesCS7D01G374600	chr7D	484925190	484928589	TPX2 (Targeting protein for Xklp2) family protein
	TRINITY_DN5044_c0_g2	-10.2351	1.31e-16	7.78e-15	DOWN	TRINITY_DN5044_c0_g2	TraesCS6A01G321200.1	1823	1909	2922	1.17e-28	TraesCS6A01G321200	chr6A	555723204	555732132	DNA repair/recombination protein
	TRINITY_DN84137_c0_g1	-10.2105	1.39e-16	8.26e-15	DOWN	TRINITY_DN84137_c0_g1	TraesCSU01G213900.1	155	321	459	6.69e-68	TraesCSU01G213900	chrUn	317207397	317207855	Polyubiquitin family protein
	TRINITY_DN7796_c0_g1	-3.80086	1.43e-16	8.47e-15	DOWN	TRINITY_DN7796_c0_g1	TraesCS7A01G427000.1	1	219	861	5.73e-102	TraesCS7A01G427000	chr7A	620171467	620172850	Xyloglucan endotransglucosylase/hydrolase
	TRINITY_DN26399_c3_g1	-7.81928	1.49e-16	8.82e-15	DOWN	NA	NA	NA	NA	NA	NA	NA	NA	NA	NA	NA
	TRINITY_DN56670_c0_g1	-10.2816	1.56e-16	9.18e-15	DOWN	TRINITY_DN56670_c0_g1	TraesCS6A01G403300.1	1481	2296	2799	0	TraesCS6A01G403300	chr6A	610651693	610661414	Disease resistance protein RPM1
	TRINITY_DN16598_c0_g1	-10.3066	1.6e-16	9.45e-15	DOWN	TRINITY_DN16598_c0_g1	TraesCS1A01G065000.1	898	944	1020	2.15e-09	TraesCS1A01G065000	chr1A	47209815	47211960	Importin subunit beta-1
	TRINITY_DN20512_c0_g2	-10.4762	1.64e-16	9.62e-15	DOWN	TRINITY_DN20512_c0_g2	TraesCS6A01G410700.2	1700	1800	1800	1.34e-46	TraesCS6A01G410700	chr6A	613766998	613771185	Sucrose transporter
	TRINITY_DN31696_c0_g2	-10.6293	1.64e-16	9.63e-15	DOWN	TRINITY_DN31696_c0_g2	TraesCS1B01G018200.1	493	1383	1833	0	TraesCS1B01G018200	chr1B	8772618	8774769	Arginine decarboxylase
	TRINITY_DN45626_c2_g1	-6.9823	1.64e-16	9.64e-15	DOWN	TRINITY_DN45626_c2_g1	TraesCS4A01G457700.1	933	1799	2418	0	TraesCS4A01G457700	chr4A	722899809	722905157	Membrane protein of ER body-like protein
	TRINITY_DN44498_c0_g1	-10.2005	1.66e-16	9.74e-15	DOWN	NA	NA	NA	NA	NA	NA	NA	NA	NA	NA	NA
	TRINITY_DN4922_c1_g2	-5.54275	1.66e-16	9.74e-15	DOWN	NA	NA	NA	NA	NA	NA	NA	NA	NA	NA	NA
	TRINITY_DN71028_c0_g1	-10.4684	1.7e-16	9.93e-15	DOWN	TRINITY_DN71028_c0_g1	TraesCS7B01G065800.1	1663	1444	3198	1.74e-109	TraesCS7B01G065800	chr7B	71361800	71367659	Auxin response factor
	TRINITY_DN48473_c0_g6	-10.8073	1.71e-16	1e-14	DOWN	TRINITY_DN48473_c0_g6	TraesCS3D01G466900.1	467	709	1083	2.06e-120	TraesCS3D01G466900	chr3D	570145157	570146593	Jasmonate O-methyltransferase
	TRINITY_DN25365_c0_g2	-10.1973	1.85e-16	1.08e-14	DOWN	TRINITY_DN25365_c0_g2	TraesCS6B01G339400.1	306	444	6090	7.21e-37	TraesCS6B01G339400	chr6B	599049689	599071393	Nuclear-pore anchor
	TRINITY_DN10896_c0_g1	-10.215	1.86e-16	1.08e-14	DOWN	TRINITY_DN10896_c0_g1	TraesCS7A01G374000.1	1111	1219	2124	7.28e-36	TraesCS7A01G374000	chr7A	547082226	547088229	ATP dependent RNA helicase
	TRINITY_DN16748_c0_g4	-10.2112	1.93e-16	1.12e-14	DOWN	TRINITY_DN16748_c0_g4	TraesCS3A01G179100.1	375	301	417	6.79e-10	TraesCS3A01G179100	chr3A	205689861	205690277	HECT ubiquitin protein ligase family protein KAK
	TRINITY_DN14139_c1_g1	-3.50034	2.05e-16	1.19e-14	DOWN	TRINITY_DN14139_c1_g1	TraesCS7D01G403200.1	341	1	357	7.5e-172	TraesCS7D01G403200	chr7D	520403905	520404949	Zinc finger family protein
	TRINITY_DN26013_c0_g1	-11.5614	2.16e-16	1.24e-14	DOWN	TRINITY_DN26013_c0_g1	TraesCS2A01G007100.1	373	1123	1329	0	TraesCS2A01G007100	chr2A	3100457	3101863	Major Facilitator Superfamily protein, expressed
	TRINITY_DN211061_c0_g1	-10.3129	2.3e-16	1.33e-14	DOWN	NA	NA	NA	NA	NA	NA	NA	NA	NA	NA	NA
	TRINITY_DN13508_c1_g1	-10.1776	2.31e-16	1.33e-14	DOWN	TRINITY_DN13508_c1_g1	TraesCS6B01G045000.1	308	1146	1188	0	TraesCS6B01G045000	chr6B	26840783	26841970	Mitochondrial transcription termination factor-like
	TRINITY_DN40957_c0_g1	-10.1903	2.34e-16	1.34e-14	DOWN	TRINITY_DN40957_c0_g1	TraesCS7D01G039600.2	700	780	780	4.44e-27	TraesCS7D01G039600	chr7D	20238500	20240291	Haloacid dehalogenase-like hydrolase domain-containing protein 3
	TRINITY_DN65910_c0_g1	-10.4691	2.35e-16	1.35e-14	DOWN	TRINITY_DN65910_c0_g1	TraesCS7A01G510800.1	928	1287	2850	9.79e-174	TraesCS7A01G510800	chr7A	698677124	698680411	Plasma membrane ATPase
	TRINITY_DN121382_c0_g1	-10.184	2.49e-16	1.43e-14	DOWN	TRINITY_DN121382_c0_g1	TraesCS4A01G377500.2	1	516	516	0	TraesCS4A01G377500	chr4A	652849610	652857706	Ras GTPase-activating protein-binding protein 1
	TRINITY_DN40710_c0_g1	-10.1912	2.57e-16	1.47e-14	DOWN	TRINITY_DN40710_c0_g1	TraesCS3D01G001900.1	1041	1110	1110	2.91e-29	TraesCS3D01G001900	chr3D	866382	870469	U-box domain-containing protein
	TRINITY_DN20543_c1_g3	-10.1686	2.83e-16	1.62e-14	DOWN	TRINITY_DN20543_c1_g3	TraesCS7D01G550900.1	3107	3315	3315	6.96e-73	TraesCS7D01G550900	chr7D	634691966	634696889	DUF789 family protein
	TRINITY_DN35203_c0_g1	-10.33	2.96e-16	1.69e-14	DOWN	NA	NA	NA	NA	NA	NA	NA	NA	NA	NA	NA
	TRINITY_DN51316_c0_g1	-10.1643	2.99e-16	1.7e-14	DOWN	TRINITY_DN51316_c0_g1	TraesCS7A01G369300.1	79	177	1671	1.91e-21	TraesCS7A01G369300	chr7A	542811837	542819418	Aldehyde dehydrogenase, putative
	TRINITY_DN53159_c0_g1	-10.6536	3.07e-16	1.75e-14	DOWN	TRINITY_DN53159_c0_g1	TraesCS7D01G405500.1	358	647	1173	1.38e-131	TraesCS7D01G405500	chr7D	523045580	523048676	12-oxophytodienoate reductase
	TRINITY_DN45495_c0_g1	-3.49873	3.11e-16	1.77e-14	DOWN	NA	NA	NA	NA	NA	NA	NA	NA	NA	NA	NA
	TRINITY_DN20988_c0_g1	-10.2649	3.2e-16	1.82e-14	DOWN	TRINITY_DN20988_c0_g1	TraesCS2D01G512100.1	720	975	1002	9.61e-108	TraesCS2D01G512100	chr2D	603541123	603543385	Isoaspartyl peptidase/L-asparaginase
	TRINITY_DN18668_c1_g1	-10.2515	3.23e-16	1.83e-14	DOWN	NA	NA	NA	NA	NA	NA	NA	NA	NA	NA	NA
	TRINITY_DN20877_c0_g1	-6.28633	3.41e-16	1.92e-14	DOWN	TRINITY_DN20877_c0_g1	TraesCS6D01G278600.1	351	531	3363	8.88e-51	TraesCS6D01G278600	chr6D	386944938	386950973	RNA-dependent RNA polymerase
	TRINITY_DN21222_c1_g1	-10.1608	3.41e-16	1.92e-14	DOWN	NA	NA	NA	NA	NA	NA	NA	NA	NA	NA	NA
	TRINITY_DN39277_c0_g1	-10.1608	3.41e-16	1.92e-14	DOWN	NA	NA	NA	NA	NA	NA	NA	NA	NA	NA	NA
	TRINITY_DN4357_c1_g1	-10.272	3.43e-16	1.94e-14	DOWN	NA	NA	NA	NA	NA	NA	NA	NA	NA	NA	NA
	TRINITY_DN22849_c0_g1	-10.4095	3.58e-16	2.01e-14	DOWN	TRINITY_DN22849_c0_g1	TraesCS4A01G047500.1	21	259	939	2.33e-103	TraesCS4A01G047500	chr4A	38710993	38714518	50S ribosomal protein L22
	TRINITY_DN43477_c0_g1	-6.10522	3.81e-16	2.13e-14	DOWN	TRINITY_DN43477_c0_g1	TraesCS7A01G544700.3	4664	5289	6468	0	TraesCS7A01G544700	chr7A	721094163	721106198	DNA helicase
	TRINITY_DN11087_c0_g1	-10.4384	3.88e-16	2.17e-14	DOWN	TRINITY_DN11087_c0_g1	TraesCS2A01G000700.1	1	42	699	1.23e-13	TraesCS2A01G000700	chr2A	395708	400932	Histone deacetylase complex subunit SAP30
	TRINITY_DN21570_c0_g2	-10.1422	3.89e-16	2.17e-14	DOWN	NA	NA	NA	NA	NA	NA	NA	NA	NA	NA	NA
	TRINITY_DN49924_c2_g1	-10.2382	4.04e-16	2.26e-14	DOWN	TRINITY_DN49924_c2_g1	TraesCS3B01G054700.1	733	984	984	1.57e-103	TraesCS3B01G054700	chr3B	28363801	28364784	Receptor-like kinase
	TRINITY_DN63636_c0_g1	-10.1489	4.35e-16	2.42e-14	DOWN	TRINITY_DN63636_c0_g1	TraesCS5D01G044300.1	713	2038	3855	4.85e-165	TraesCS5D01G044300	chr5D	43316281	43320236	NBS-LRR-like resistance protein
	TRINITY_DN31975_c0_g1	-10.3848	4.47e-16	2.49e-14	DOWN	TRINITY_DN31975_c0_g1	TraesCS2D01G097200.1	1595	1767	1767	3.03e-73	TraesCS2D01G097200	chr2D	49616084	49619184	Guanine nucleotide-binding protein-like 3-like protein
	TRINITY_DN63808_c0_g1	-6.46909	4.62e-16	2.57e-14	DOWN	TRINITY_DN63808_c0_g1	TraesCS7B01G336700.1	337	464	480	4.72e-52	TraesCS7B01G336700	chr7B	591713455	591713934	Histone H2A
	TRINITY_DN26346_c0_g1	-10.4935	4.71e-16	2.62e-14	DOWN	TRINITY_DN26346_c0_g1	TraesCS2D01G015000.1	1002	1313	1539	8.54e-164	TraesCS2D01G015000	chr2D	7198327	7200661	Cytochrome P450 family protein, expressed
	TRINITY_DN57946_c0_g1	-10.4911	4.75e-16	2.64e-14	DOWN	TRINITY_DN57946_c0_g1	TraesCS7B01G270200.1	1	118	621	2.3e-49	TraesCS7B01G270200	chr7B	495303408	495311463	PPPDE thiol peptidase family protein, putative
	TRINITY_DN24691_c0_g1	-10.1808	4.82e-16	2.67e-14	DOWN	TRINITY_DN24691_c0_g1	TraesCS7A01G451100.1	780	885	885	5.05e-46	TraesCS7A01G451100	chr7A	644461057	644463200	Phosphosulfolactate synthase-related protein
	TRINITY_DN34601_c0_g1	-10.2858	4.96e-16	2.75e-14	DOWN	TRINITY_DN34601_c0_g1	TraesCS7D01G381400.1	882	1119	1119	2.1e-94	TraesCS7D01G381400	chr7D	495692673	495697650	ATP-dependent zinc metalloprotease FtsH
	TRINITY_DN16111_c0_g7	-10.1278	4.96e-16	2.75e-14	DOWN	NA	NA	NA	NA	NA	NA	NA	NA	NA	NA	NA
	TRINITY_DN10793_c0_g1	-5.33872	5e-16	2.77e-14	DOWN	TRINITY_DN10793_c0_g1	TraesCS3B01G347300.1	126	219	219	1.54e-42	TraesCS3B01G347300	chr3B	556685484	556685702	Arabinogalactan peptide 14
	TRINITY_DN28446_c0_g1	-10.2199	5.19e-16	2.86e-14	DOWN	TRINITY_DN28446_c0_g1	TraesCS7B01G360400.1	192	498	747	2.45e-134	TraesCS7B01G360400	chr7B	622670263	622672532	Tetraspanin family protein, putative
	TRINITY_DN55135_c0_g1	-10.9121	5.26e-16	2.9e-14	DOWN	TRINITY_DN55135_c0_g1	TraesCS3D01G001600.1	658	864	1179	1.29e-95	TraesCS3D01G001600	chr3D	774083	776332	TPX2 (Targeting protein for Xklp2) family protein
	TRINITY_DN133821_c0_g1	-10.1335	6.81e-16	3.72e-14	DOWN	NA	NA	NA	NA	NA	NA	NA	NA	NA	NA	NA
	TRINITY_DN69050_c0_g1	-10.4359	6.87e-16	3.75e-14	DOWN	TRINITY_DN69050_c0_g1	TraesCS3A01G003900.1	498	827	2064	4.33e-127	TraesCS3A01G003900	chr3A	1925388	1928343	Receptor-like kinase
	TRINITY_DN10903_c0_g2	-10.8417	7.1e-16	3.86e-14	DOWN	NA	NA	NA	NA	NA	NA	NA	NA	NA	NA	NA
	TRINITY_DN33437_c0_g1	-10.1134	7.11e-16	3.87e-14	DOWN	TRINITY_DN33437_c0_g1	TraesCS7A01G504900.2	67	302	903	1.61e-101	TraesCS7A01G504900	chr7A	692905529	692907941	Photosystem II reaction center PsbP family protein
	TRINITY_DN31555_c1_g1	-10.8689	7.15e-16	3.88e-14	DOWN	NA	NA	NA	NA	NA	NA	NA	NA	NA	NA	NA
	TRINITY_DN20237_c0_g1	-10.1698	7.47e-16	4.05e-14	DOWN	TRINITY_DN20237_c0_g1	TraesCS7B01G482000.1	1	68	1275	5.4e-28	TraesCS7B01G482000	chr7B	739442503	739445446	Phytoene synthase
	TRINITY_DN8658_c0_g2	-10.2252	7.6e-16	4.11e-14	DOWN	TRINITY_DN8658_c0_g2	TraesCS5A01G408200.1	483	576	630	1.52e-16	TraesCS5A01G408200	chr5A	598632827	598634515	Villin-4
	TRINITY_DN80213_c0_g1	-10.1478	7.64e-16	4.13e-14	DOWN	TRINITY_DN80213_c0_g1	TraesCS2A01G026900.1	1	29	474	1.61e-06	TraesCS2A01G026900	chr2A	12325205	12327439	HR-like lesion-inducing protein-related protein
	TRINITY_DN30194_c0_g1	-10.6233	7.91e-16	4.27e-14	DOWN	TRINITY_DN30194_c0_g1	TraesCS7A01G557700.2	925	1426	3276	0	TraesCS7A01G557700	chr7A	730430976	730434251	NBS-LRR disease resistance protein
	TRINITY_DN16748_c0_g5	-10.0963	8.32e-16	4.48e-14	DOWN	NA	NA	NA	NA	NA	NA	NA	NA	NA	NA	NA
	TRINITY_DN22655_c0_g1	-5.71118	8.54e-16	4.59e-14	DOWN	NA	NA	NA	NA	NA	NA	NA	NA	NA	NA	NA
	TRINITY_DN26084_c0_g1	-10.1438	8.67e-16	4.65e-14	DOWN	TRINITY_DN26084_c0_g1	TraesCS5A01G107100.1	6	77	288	1.52e-26	TraesCS5A01G107100	chr5A	180347402	180347689	kinesin 3
	TRINITY_DN62829_c0_g1	-10.1069	8.68e-16	4.65e-14	DOWN	TRINITY_DN62829_c0_g1	TraesCS7B01G461900.1	364	657	1059	8.11e-154	TraesCS7B01G461900	chr7B	719081908	719083770	Receptor-like protein kinase
	TRINITY_DN70381_c0_g1	-11.0441	8.72e-16	4.66e-14	DOWN	TRINITY_DN70381_c0_g1	TraesCS2A01G315300.1	404	712	1461	2.21e-150	TraesCS2A01G315300	chr2A	540847884	540850128	Glutamate decarboxylase
	TRINITY_DN51969_c2_g1	-10.5426	8.77e-16	4.69e-14	DOWN	TRINITY_DN51969_c2_g1	TraesCS2B01G561200.1	58	273	273	1.54e-80	TraesCS2B01G561200	chr2B	753997107	753997379	Wound-responsive family protein
	TRINITY_DN87224_c0_g1	-10.0919	9.67e-16	5.15e-14	DOWN	NA	NA	NA	NA	NA	NA	NA	NA	NA	NA	NA
	TRINITY_DN23928_c0_g1	-13.2342	1.02e-15	5.4e-14	DOWN	NA	NA	NA	NA	NA	NA	NA	NA	NA	NA	NA
	TRINITY_DN61623_c0_g2	-7.08031	1.02e-15	5.42e-14	DOWN	TRINITY_DN61623_c0_g2	TraesCS3D01G364700.1	1160	958	1515	4.78e-73	TraesCS3D01G364700	chr3D	478537990	478540009	Glutamyl-tRNA (Gln) amidotransferase subunit A
	TRINITY_DN25005_c0_g1	-3.36453	1.04e-15	5.52e-14	DOWN	TRINITY_DN25005_c0_g1	TraesCS2A01G168200.1	556	2496	2496	0	TraesCS2A01G168200	chr2A	121141338	121145857	Sucrose synthase
	TRINITY_DN22600_c0_g1	-10.255	1.12e-15	5.9e-14	DOWN	TRINITY_DN22600_c0_g1	TraesCS6A01G396200.1	1	198	1074	1.51e-44	TraesCS6A01G396200	chr6A	608505176	608508548	Ankyrin repeat family protein
	TRINITY_DN14149_c0_g2	-10.2948	1.14e-15	5.99e-14	DOWN	TRINITY_DN14149_c0_g2	TraesCS7B01G319900.1	1444	1775	1887	1.59e-131	TraesCS7B01G319900	chr7B	569945601	569952446	UDP-sugar pyrophosphorylase
	TRINITY_DN31347_c0_g1	-10.2014	1.21e-15	6.34e-14	DOWN	NA	NA	NA	NA	NA	NA	NA	NA	NA	NA	NA
	TRINITY_DN48684_c0_g1	-10.2467	1.23e-15	6.44e-14	DOWN	TRINITY_DN48684_c0_g1	TraesCS6A01G339400.1	1429	1647	2352	2.92e-102	TraesCS6A01G339400	chr6A	572572026	572574377	Subtilisin protease
	TRINITY_DN17412_c0_g2	-10.0618	1.39e-15	7.21e-14	DOWN	TRINITY_DN17412_c0_g2	TraesCS2A01G564000.1	1218	1505	1590	1.72e-150	TraesCS2A01G564000	chr2A	764321984	764324786	E3 ubiquitin-protein ligase
	TRINITY_DN13577_c0_g1	-10.0558	1.42e-15	7.33e-14	DOWN	NA	NA	NA	NA	NA	NA	NA	NA	NA	NA	NA
	TRINITY_DN14421_c0_g1	-10.1545	1.43e-15	7.39e-14	DOWN	NA	NA	NA	NA	NA	NA	NA	NA	NA	NA	NA
	TRINITY_DN40094_c0_g2	-10.1217	1.43e-15	7.4e-14	DOWN	TRINITY_DN40094_c0_g2	TraesCS3D01G513700.1	355	557	1578	3.2e-58	TraesCS3D01G513700	chr3D	597616763	597620277	CBS domain-containing protein-like
	TRINITY_DN51480_c0_g1	-10.0672	1.48e-15	7.65e-14	DOWN	TRINITY_DN51480_c0_g1	TraesCS7A01G540000.1	3856	3909	3909	1.52e-20	TraesCS7A01G540000	chr7A	717080943	717092746	Mediator of rna polymerase ii transcription subunit 15a
	TRINITY_DN12360_c0_g1	-10.0521	1.57e-15	8.1e-14	DOWN	TRINITY_DN12360_c0_g1	TraesCS3B01G012000.1	218	381	381	3.52e-50	TraesCS3B01G012000	chr3B	5406106	5406486	Misshapen-like kinase 1
	TRINITY_DN54841_c0_g1	-10.1492	1.69e-15	8.68e-14	DOWN	NA	NA	NA	NA	NA	NA	NA	NA	NA	NA	NA
	TRINITY_DN29208_c1_g1	-10.0481	1.69e-15	8.69e-14	DOWN	TRINITY_DN29208_c1_g1	TraesCS3A01G115700.1	533	660	738	3.08e-49	TraesCS3A01G115700	chr3A	83690873	83693853	UDP-D-apiose/UDP-D-xylose synthase 2
	TRINITY_DN31693_c1_g2	-10.0484	1.7e-15	8.7e-14	DOWN	TRINITY_DN31693_c1_g2	TraesCS6B01G437200.1	938	1295	1497	0	TraesCS6B01G437200	chr6B	704371677	704374366	FBD-associated F-box protein
	TRINITY_DN13681_c0_g1	-10.0968	1.72e-15	8.83e-14	DOWN	TRINITY_DN13681_c0_g1	TraesCS5B01G029100.1	1749	1920	2982	2.06e-47	TraesCS5B01G029100	chr5B	27830168	27839871	Serine/threonine-protein phosphatase
	TRINITY_DN564_c1_g1	-10.3192	1.73e-15	8.83e-14	DOWN	TRINITY_DN564_c1_g1	TraesCS5A01G511000.1	594	1263	1263	0	TraesCS5A01G511000	chr5A	674543878	674545262	Phospholipase A1
	TRINITY_DN14859_c0_g1	-6.92478	1.78e-15	9.09e-14	DOWN	TRINITY_DN14859_c0_g1	TraesCS6A01G057700.1	603	641	981	1.82e-08	TraesCS6A01G057700	chr6A	30431570	30435024	RNA-binding KH domain-containing protein
	TRINITY_DN925_c2_g2	-10.1061	1.82e-15	9.27e-14	DOWN	NA	NA	NA	NA	NA	NA	NA	NA	NA	NA	NA
	TRINITY_DN26318_c1_g1	-10.0514	1.91e-15	9.72e-14	DOWN	NA	NA	NA	NA	NA	NA	NA	NA	NA	NA	NA
	TRINITY_DN91319_c0_g1	-4.74875	1.94e-15	9.83e-14	DOWN	TRINITY_DN91319_c0_g1	TraesCS4B01G381000.1	1549	1592	1674	8.4e-09	TraesCS4B01G381000	chr4B	660904212	660910492	RING-finger ubiquitin ligase
	TRINITY_DN35542_c0_g1	-6.50862	2.01e-15	1.02e-13	DOWN	TRINITY_DN35542_c0_g1	TraesCS3D01G112000.1	166	668	699	0	TraesCS3D01G112000	chr3D	66339853	66341145	Protodermal factor 1
	TRINITY_DN31365_c0_g1	-11.0211	2.07e-15	1.05e-13	DOWN	NA	NA	NA	NA	NA	NA	NA	NA	NA	NA	NA
	TRINITY_DN40117_c1_g1	-10.0546	2.16e-15	1.09e-13	DOWN	TRINITY_DN40117_c1_g1	TraesCS7B01G338900.1	430	617	987	5.25e-85	TraesCS7B01G338900	chr7B	593185327	593187993	2-oxoglutarate (2OG) and Fe(II)-dependent oxygenase superfamily protein
	TRINITY_DN38300_c0_g1	-10.4091	2.17e-15	1.09e-13	DOWN	TRINITY_DN38300_c0_g1	TraesCS7B01G412700.1	532	780	1173	1.58e-105	TraesCS7B01G412700	chr7B	680276900	680281365	Anthocyanidin reductase
	TRINITY_DN51692_c0_g1	-10.0229	2.25e-15	1.13e-13	DOWN	TRINITY_DN51692_c0_g1	TraesCS7B01G481500.1	1	902	1266	0	TraesCS7B01G481500	chr7B	735809058	735810323	Polynucleotidyl transferase, ribonuclease H-like superfamily protein
	TRINITY_DN26003_c1_g1	-10.0376	2.37e-15	1.19e-13	DOWN	TRINITY_DN26003_c1_g1	TraesCS7A01G557400.1	1	1102	3099	0	TraesCS7A01G557400	chr7A	729935833	729941928	Protein argonaute
	TRINITY_DN86590_c0_g1	-10.0181	2.45e-15	1.23e-13	DOWN	TRINITY_DN86590_c0_g1	TraesCS2A01G531800.1	191	267	267	4.08e-28	TraesCS2A01G531800	chr2A	748558310	748558576	Wound-responsive family protein
	TRINITY_DN14407_c0_g2	-7.26612	2.59e-15	1.3e-13	DOWN	NA	NA	NA	NA	NA	NA	NA	NA	NA	NA	NA
	TRINITY_DN16066_c0_g2	-10.0216	2.63e-15	1.31e-13	DOWN	TRINITY_DN16066_c0_g2	TraesCS5B01G422400.1	5317	5606	5631	1.34e-151	TraesCS5B01G422400	chr5B	597289088	597305326	NBS-LRR-like resistance protein
	TRINITY_DN10440_c0_g1	-3.30046	2.77e-15	1.38e-13	DOWN	TRINITY_DN10440_c0_g1	TraesCS4D01G130700.1	827	1146	1146	5.2e-168	TraesCS4D01G130700	chr4D	116819051	116823138	Omega-3 fatty acid desaturase
	TRINITY_DN103603_c0_g1	-10.0658	2.92e-15	1.45e-13	DOWN	TRINITY_DN103603_c0_g1	TraesCS3A01G030000.1	1	142	996	1.96e-69	TraesCS3A01G030000	chr3A	15779149	15780907	E3 ubiquitin-protein ligase
	TRINITY_DN60281_c1_g1	-10.148	2.95e-15	1.47e-13	DOWN	TRINITY_DN60281_c1_g1	TraesCS2A01G531500.1	1	94	273	4.69e-31	TraesCS2A01G531500	chr2A	748542328	748542600	Wound-responsive family protein
	TRINITY_DN47216_c0_g1	-10.0989	3e-15	1.49e-13	DOWN	TRINITY_DN47216_c0_g1	TraesCS7A01G412400.1	1116	1173	1173	2.96e-19	TraesCS7A01G412400	chr7A	603291733	603294860	12-oxophytodienoate reductase
	TRINITY_DN670_c0_g1	-3.80943	3.03e-15	1.5e-13	DOWN	TRINITY_DN670_c0_g1	TraesCS3D01G264600.1	1	534	558	0	TraesCS3D01G264600	chr3D	366223327	366224407	DUF4228 domain protein
	TRINITY_DN16350_c1_g1	-9.99673	3.21e-15	1.59e-13	DOWN	NA	NA	NA	NA	NA	NA	NA	NA	NA	NA	NA
	TRINITY_DN13147_c1_g2	-7.65344	3.23e-15	1.6e-13	DOWN	NA	NA	NA	NA	NA	NA	NA	NA	NA	NA	NA
	TRINITY_DN21455_c0_g3	-10.535	3.39e-15	1.67e-13	DOWN	TRINITY_DN21455_c0_g3	TraesCS2B01G496700.1	2055	2757	4515	7.27e-168	TraesCS2B01G496700	chr2B	693321635	693326149	NBS-LRR disease resistance protein-like protein
	TRINITY_DN201549_c0_g1	-10.0569	3.43e-15	1.69e-13	DOWN	NA	NA	NA	NA	NA	NA	NA	NA	NA	NA	NA
	TRINITY_DN13923_c0_g2	-10.0037	3.55e-15	1.74e-13	DOWN	TRINITY_DN13923_c0_g2	TraesCS3D01G313800.1	2236	2353	2487	1.76e-30	TraesCS3D01G313800	chr3D	427803032	427810218	Katanin p80 WD40 repeat-containing subunit B1 homolog
	TRINITY_DN8296_c1_g1	-6.87506	3.59e-15	1.76e-13	DOWN	NA	NA	NA	NA	NA	NA	NA	NA	NA	NA	NA
	TRINITY_DN16823_c0_g2	-6.12389	3.59e-15	1.76e-13	DOWN	TRINITY_DN16823_c0_g2	TraesCS3A01G254100.1	1	591	591	0	TraesCS3A01G254100	chr3A	475716449	475717144	Pectinesterase
	TRINITY_DN9059_c0_g4	-6.99572	3.61e-15	1.76e-13	DOWN	TRINITY_DN9059_c0_g4	TraesCS5B01G373800.1	103	204	1383	2.56e-43	TraesCS5B01G373800	chr5B	551416068	551421063	Ulp1 protease family, C-terminal catalytic domain containing protein
	TRINITY_DN72615_c0_g1	-9.99026	3.67e-15	1.79e-13	DOWN	TRINITY_DN72615_c0_g1	TraesCS7A01G557800.1	4208	4565	5298	2.76e-164	TraesCS7A01G557800	chr7A	730454303	730464405	Chromodomain-helicase-DNA-binding family protein
	TRINITY_DN20724_c0_g1	-9.99879	3.71e-15	1.81e-13	DOWN	NA	NA	NA	NA	NA	NA	NA	NA	NA	NA	NA
	TRINITY_DN21422_c0_g1	-10.1748	4.02e-15	1.95e-13	DOWN	NA	NA	NA	NA	NA	NA	NA	NA	NA	NA	NA
	TRINITY_DN3138_c2_g1	-10.0198	4.07e-15	1.98e-13	DOWN	NA	NA	NA	NA	NA	NA	NA	NA	NA	NA	NA
	TRINITY_DN52558_c0_g1	-10.1045	4.08e-15	1.98e-13	DOWN	TRINITY_DN52558_c0_g1	TraesCS6A01G037800.1	1728	1761	1761	2.47e-09	TraesCS6A01G037800	chr6A	18705010	18708190	RNA-binding NOB1
	TRINITY_DN38954_c0_g1	-10.0295	4.1e-15	1.99e-13	DOWN	NA	NA	NA	NA	NA	NA	NA	NA	NA	NA	NA
	TRINITY_DN54003_c0_g1	-10.4179	4.25e-15	2.05e-13	DOWN	TRINITY_DN54003_c0_g1	TraesCS7A01G521400.1	27	271	849	7.11e-99	TraesCS7A01G521400	chr7A	705278851	705281313	Ubiquitin system component Cue protein, putative
	TRINITY_DN188476_c0_g1	-9.97849	4.44e-15	2.14e-13	DOWN	TRINITY_DN188476_c0_g1	TraesCS7B01G209700.1	984	653	1932	6.98e-170	TraesCS7B01G209700	chr7B	382606239	382610804	BTB/POZ domain-containing protein
	TRINITY_DN10020_c0_g1	-12.2918	4.49e-15	2.16e-13	DOWN	TRINITY_DN10020_c0_g1	TraesCS6D01G206200.1	1	1278	1278	0	TraesCS6D01G206200	chr6D	291959163	291960440	Leucine-rich repeat protein kinase family protein
	TRINITY_DN28756_c1_g2	-10.3479	4.52e-15	2.18e-13	DOWN	TRINITY_DN28756_c1_g2	TraesCS1A01G173900.1	113	62	744	3.11e-10	TraesCS1A01G173900	chr1A	309910012	309913118	Diacylglycerol O-acyltransferase 2
	TRINITY_DN35965_c0_g1	-10.0643	4.63e-15	2.23e-13	DOWN	TRINITY_DN35965_c0_g1	TraesCS7A01G402500.1	311	363	1203	1.26e-19	TraesCS7A01G402500	chr7A	581845057	581848708	Ribose-phosphate pyrophosphokinase
	TRINITY_DN25290_c0_g1	-9.991	5.04e-15	2.41e-13	DOWN	NA	NA	NA	NA	NA	NA	NA	NA	NA	NA	NA
	TRINITY_DN94600_c0_g1	-10.7249	5.04e-15	2.41e-13	DOWN	TRINITY_DN94600_c0_g1	TraesCS7A01G074500.3	3465	3504	3771	8.7e-13	TraesCS7A01G074500	chr7A	40184774	40196229	ABC transporter family protein
	TRINITY_DN103546_c0_g2	-9.96294	5.13e-15	2.45e-13	DOWN	TRINITY_DN103546_c0_g2	TraesCS4A01G484100.1	1	183	1410	2.32e-35	TraesCS4A01G484100	chr4A	738742091	738743500	F-box family protein
	TRINITY_DN61938_c0_g1	-10.0511	5.24e-15	2.5e-13	DOWN	NA	NA	NA	NA	NA	NA	NA	NA	NA	NA	NA
	TRINITY_DN23647_c0_g3	-10.0722	5.34e-15	2.54e-13	DOWN	TRINITY_DN23647_c0_g3	TraesCS6B01G061900.1	833	1266	1677	0	TraesCS6B01G061900	chr6B	41435196	41437033	Dead box ATP-dependent RNA helicase, putative
	TRINITY_DN24227_c1_g1	-9.98109	5.41e-15	2.58e-13	DOWN	TRINITY_DN24227_c1_g1	TraesCS2D01G123900.1	622	750	921	5.1e-62	TraesCS2D01G123900	chr2D	72593934	72595085	Short-chain dehydrogenase/reductase
	TRINITY_DN21940_c0_g1	-10.3894	5.63e-15	2.67e-13	DOWN	TRINITY_DN21940_c0_g1	TraesCS2A01G560400.1	2004	2202	2202	1.05e-62	TraesCS2A01G560400	chr2A	762640287	762644579	Pentatricopeptide repeat-containing family protein
	TRINITY_DN106463_c1_g1	-9.97327	5.66e-15	2.69e-13	DOWN	TRINITY_DN106463_c1_g1	TraesCS2B01G561500.1	1	66	273	3.63e-27	TraesCS2B01G561500	chr2B	754010826	754011342	Wound-responsive family protein
	TRINITY_DN29332_c1_g2	-10.1739	5.67e-15	2.69e-13	DOWN	NA	NA	NA	NA	NA	NA	NA	NA	NA	NA	NA
	TRINITY_DN54815_c0_g3	-9.97111	5.88e-15	2.78e-13	DOWN	TRINITY_DN54815_c0_g3	TraesCS2A01G087500.1	3	105	552	3.18e-24	TraesCS2A01G087500	chr2A	41150319	41150965	Adenosine monophosphate-protein transferase and cysteine protease IbpA
	TRINITY_DN48513_c0_g1	-6.26244	5.94e-15	2.81e-13	DOWN	NA	NA	NA	NA	NA	NA	NA	NA	NA	NA	NA
	TRINITY_DN52186_c0_g1	-10.025	6.15e-15	2.9e-13	DOWN	NA	NA	NA	NA	NA	NA	NA	NA	NA	NA	NA
	TRINITY_DN29639_c0_g2	-9.94266	6.79e-15	3.19e-13	DOWN	TRINITY_DN29639_c0_g2	TraesCS1A01G360500.1	1	53	1194	4e-18	TraesCS1A01G360500	chr1A	541633003	541635882	Nucleosome assembly protein 1-like 1
	TRINITY_DN17412_c0_g1	-10.0374	6.88e-15	3.22e-13	DOWN	TRINITY_DN17412_c0_g1	TraesCS2B01G625300.1	1131	1553	1584	0	TraesCS2B01G625300	chr2B	798134845	798139344	E3 ubiquitin-protein ligase
	TRINITY_DN167743_c0_g1	-9.94532	6.92e-15	3.24e-13	DOWN	TRINITY_DN167743_c0_g1	TraesCS3A01G350300.1	61	130	660	5.03e-24	TraesCS3A01G350300	chr3A	598907062	598908207	Rho GTPase activating protein with PAK-box/P21-Rho-binding domain-containing protein
	TRINITY_DN36369_c0_g2	-4.27351	6.99e-15	3.27e-13	DOWN	NA	NA	NA	NA	NA	NA	NA	NA	NA	NA	NA
	TRINITY_DN36324_c0_g2	-5.69238	7.27e-15	3.39e-13	DOWN	TRINITY_DN36324_c0_g2	TraesCS4B01G135900.1	286	868	1146	0	TraesCS4B01G135900	chr4B	178850763	178853937	Omega-3 fatty acid desaturase
	TRINITY_DN106863_c0_g1	-9.94159	7.64e-15	3.55e-13	DOWN	TRINITY_DN106863_c0_g1	TraesCS4D01G190000.1	111	268	450	1.34e-69	TraesCS4D01G190000	chr4D	332129795	332131025	Vacuolar protein sorting-associated protein 24-like protein 1
	TRINITY_DN86543_c0_g1	-9.93701	7.68e-15	3.57e-13	DOWN	NA	NA	NA	NA	NA	NA	NA	NA	NA	NA	NA
	TRINITY_DN28348_c0_g2	-5.90028	7.7e-15	3.58e-13	DOWN	NA	NA	NA	NA	NA	NA	NA	NA	NA	NA	NA
[truncated: 10,937 more rows]

## Sheet: Gene Ontology_M3H_vs_P3
	Insight into the mechanisms of terminal HS-tolerance in wheat mutant with improved nutritional quality through de novo transcriptome sequencing Ranjeet R. Kumar, Suman Bakshi, Kavita Dubey, Sumedha Hasija, Gyanendra K. Rai, Neelu Jain, Sanjay Jambhulkar, Bhupinder Singh, Gyanendra P. Singh, & Shelly Praveen
[truncated: 12,409 more rows]

[truncated: 1 more sheets: Gene Ontology_M3H_vs_P]
