# Supplementary material for: Insight into the mechanisms of terminal HS-tolerance in wheat mutant with improved nutritional quality through de novo transcriptome sequencing
Source: Research Square preprint supplement (doi:10.21203/rs.3.rs-241832/v1), 2021-02-26
Supplement: Supplementary file 13 [file bf4ae377fb0dd10fa8b3d1f8.xlsx]

## Sheet: Sheet1
			Insight into the mechanisms of terminal HS-tolerance in wheat mutant with improved nutritional quality through de novo transcriptome sequencing Ranjeet R. Kumar, Suman Bakshi, Kavita Dubey, Sumedha Hasija, Gyanendra K. Rai, Neelu Jain, Sanjay Jambhulkar, Bhupinder Singh, Gyanendra P. Singh, & Shelly Praveen
		Table S10 List of differentially expressed transcripts identified to be heat-responsive transcription factors and heat shock proteins in wheat mutant (M3) through de novo transcriptomic approach
		Trinity_GeneID	logFC	PValue	FDR	Wheat_Transcript_ID	Transcript_Start	Transcript_End	Transcript length	E value	Wheat_Gene_ID	Chromosome	Gene_Start	Gene_End	Description/Protein Name
		TRINITY_DN8393_c6_g1	17.8942	7.98e-39	5.56e-36	TraesCS4D01G212500.1	1	214	468	8.07e-108	TraesCS4D01G212500	chr4D	365506981	365507656	Heat-shock protein
		TRINITY_DN8393_c7_g1	17.5158	5.01e-56	1.72e-52	TraesCS5B01G245700.1	192	423	465	1.82e-119	TraesCS5B01G245700	chr5B	426651504	426651968	Heat shock protein
		TRINITY_DN34989_c1_g1	17.4652	2.59e-74	5.33e-70	TraesCS2A01G312900.1	660	609	660	2.15e-19	TraesCS2A01G312900	chr2A	537456162	537456821	Heat-shock protein, putative
		TRINITY_DN89874_c0_g1	17.4595	8.92e-46	1.17e-42	TraesCS3A01G034500.1	78	282	456	1.63e-99	TraesCS3A01G034500	chr3A	19466930	19467666	Heat shock protein
		TRINITY_DN15834_c0_g2	17.3232	1.44e-38	9.55e-36	TraesCS7A01G360400.1	1	214	1077	2.44e-99	TraesCS7A01G360400	chr7A	533995324	533996694	Heat shock transcription factor family protein
		TRINITY_DN21155_c0_g2	15.6719	9.95e-78	4.09e-73	TraesCS4A01G068200.1	423	259	717	3.11e-77	TraesCS4A01G068200	chr4A	66608871	66609979	Heat shock protein
		TRINITY_DN25343_c0_g1	15.5077	1.98e-57	8.15e-54	TraesCS3A01G274400.1	1278	1343	2742	3.52e-27	TraesCS3A01G274400	chr3A	503751786	503755145	Chaperone clpb, putative
		TRINITY_DN21155_c0_g1	15.5023	2.91e-61	1.84e-57	TraesCS4B01G225400.1	265	442	732	2.65e-89	TraesCS4B01G225400	chr4B	471956428	471957605	Heat shock protein
		TRINITY_DN77260_c0_g1	14.7216	2.92e-51	5.86e-48	TraesCS4B01G225400.1	485	692	732	3.57e-101	TraesCS4B01G225400	chr4B	471956428	471957605	Heat shock protein
		TRINITY_DN11203_c0_g1	14.7118	7.46e-68	7.67e-64	TraesCS3D01G273600.2	2231	2486	2688	9.27e-133	TraesCS3D01G273600	chr3D	379536248	379539614	Chaperone clpb, putative
		TRINITY_DN77260_c1_g1	14.7054	4.55e-43	4.46e-40	TraesCS4D01G226000.1	717	443	717	1.23e-132	TraesCS4D01G226000	chr4D	384975222	384976356	Heat shock protein
		TRINITY_DN20098_c0_g2	14.4719	3.37e-63	2.52e-59	TraesCS3D01G273600.1	2707	2436	2742	2.95e-138	TraesCS3D01G273600	chr3D	379536248	379539614	Chaperone clpb, putative
		TRINITY_DN26865_c3_g1	14.4156	3.65e-19	4.26e-17	TraesCS7B01G267300.1	617	932	1062	1.15e-142	TraesCS7B01G267300	chr7B	490432075	490433223	Heat shock transcription factor
		TRINITY_DN1603_c1_g1	14.3447	2.69e-49	4.7e-46	TraesCS3D01G046700.1	394	456	456	6.78e-24	TraesCS3D01G046700	chr3D	17591725	17592180	Heat shock protein
		NA	13.5278	4.62e-53	1.12e-49	NA	NA	NA	NA	NA	NA	NA	NA	NA	NA
		TRINITY_DN835_c0_g1	13.4788	9.29e-48	1.39e-44	TraesCS4D01G213100.1	1	156	474	3.87e-57	TraesCS4D01G213100	chr4D	365864520	365864993	Heat-shock protein, putative
		TRINITY_DN133181_c4_g1	13.361	2.64e-53	6.59e-50	TraesCS5A01G383800.1	931	741	1119	5.41e-85	TraesCS5A01G383800	chr5A	581487008	581488298	Heat shock transcription factor
		TRINITY_DN15566_c0_g1	13.2117	1.31e-52	2.76e-49	TraesCS4B01G380800.1	1407	1474	2928	2.97e-28	TraesCS4B01G380800	chr4B	660723123	660728928	ATP-dependent chaperone ClpB
		TRINITY_DN154892_c0_g1	13.2036	1.68e-18	1.82e-16	TraesCS3B01G130400.1	66	1	483	1.41e-20	TraesCS3B01G130400	chr3B	112496506	112497228	Heat shock protein
		TRINITY_DN18040_c0_g3	13.0834	8.86e-21	1.24e-18	TraesCS3B01G247200.1	41	108	576	1.36e-26	TraesCS3B01G247200	chr3B	393227665	393229669	Chaperone protein DnaJ
		TRINITY_DN14477_c0_g1	13.0595	1.12e-50	2.19e-47	TraesCS4B01G243400.1	1	82	1743	4.93e-36	TraesCS4B01G243400	chr4B	504934572	504936314	Heat shock 70 kDa protein
		TRINITY_DN301_c0_g1	12.9879	1.36e-44	1.51e-41	TraesCS7B01G267300.1	322	1062	1062	0	TraesCS7B01G267300	chr7B	490432075	490433223	Heat shock transcription factor
		TRINITY_DN4941_c0_g1	12.9878	6.59e-53	1.55e-49	TraesCS2A01G312900.1	1	660	660	0	TraesCS2A01G312900	chr2A	537456162	537456821	Heat-shock protein, putative
		TRINITY_DN8393_c5_g1	12.8058	3.63e-40	2.96e-37	TraesCS4A01G092100.1	281	355	477	2.69e-25	TraesCS4A01G092100	chr4A	98785516	98785992	Heat-shock protein, putative
		TRINITY_DN2891_c0_g2	12.7213	1.15e-33	5.19e-31	TraesCS6B01G210600.1	758	526	783	2.33e-114	TraesCS6B01G210600	chr6B	278151141	278152007	Heat shock protein
		TRINITY_DN36908_c2_g1	12.6066	5.15e-23	8.88e-21	TraesCS3B01G048600.1	1	465	465	0	TraesCS3B01G048600	chr3B	24558810	24559419	Heat shock protein
		TRINITY_DN75467_c1_g1	12.5442	1.72e-73	2.84e-69	TraesCS3D01G045600.1	277	371	456	4.18e-43	TraesCS3D01G045600	chr3D	17406976	17407431	Heat shock protein
		TRINITY_DN1603_c2_g1	12.0281	1.87e-49	3.42e-46	TraesCS3D01G045800.1	396	459	459	4.23e-17	TraesCS3D01G045800	chr3D	17433235	17433693	Heat shock protein
		TRINITY_DN8503_c0_g1	11.9943	6.22e-29	1.92e-26	TraesCS5A01G482400.1	99	161	1146	2.37e-23	TraesCS5A01G482400	chr5A	654086402	654090003	Hsp70 nucleotide exchange factor fes1
		TRINITY_DN853_c0_g1	11.9934	5.37e-48	8.34e-45	TraesCS4A01G092600.1	331	468	468	8.15e-65	TraesCS4A01G092600	chr4A	99913715	99914182	Heat-shock protein
		TRINITY_DN90702_c0_g2	11.7782	7.63e-20	9.68e-18	TraesCS5A01G482400.1	202	256	1146	2.69e-19	TraesCS5A01G482400	chr5A	654086402	654090003	Hsp70 nucleotide exchange factor fes1
		NA	11.762	1.78e-31	6.61e-29	NA	NA	NA	NA	NA	NA	NA	NA	NA	NA
		TRINITY_DN31360_c0_g1	11.6182	3.38e-57	1.33e-53	TraesCS3B01G390700.1	214	307	1959	3.29e-42	TraesCS3B01G390700	chr3B	615748962	615751502	70 kDa heat shock protein
		TRINITY_DN26865_c1_g1	11.4895	1.09e-21	1.68e-19	TraesCS7B01G267300.1	341	663	1062	1.47e-166	TraesCS7B01G267300	chr7B	490432075	490433223	Heat shock transcription factor
		TRINITY_DN58053_c0_g1	11.3248	2.84e-28	8.28e-26	TraesCS7B01G066000.1	84	156	732	4.3e-31	TraesCS7B01G066000	chr7B	72018105	72019733	10 kDa chaperonin
		TRINITY_DN2240_c0_g1	11.1856	3.62e-55	1.1e-51	TraesCS4D01G226000.1	259	705	717	0	TraesCS4D01G226000	chr4D	384975222	384976356	Heat shock protein
		TRINITY_DN6554_c0_g3	10.9728	1.07e-37	6.55e-35	TraesCSU01G047300.1	199	1	621	4.23e-67	TraesCSU01G047300	chrUn	37338311	37338931	Heat shock protein
		TRINITY_DN63167_c0_g1	10.7055	1.36e-15	1.03e-13	TraesCS4A01G095500.1	337	392	1200	1.13e-21	TraesCS4A01G095500	chr4A	103724058	103726912	Hsp70 nucleotide exchange factor fes1
		TRINITY_DN139419_c0_g1	10.6729	5.92e-22	9.38e-20	TraesCS1A01G375600.1	256	49	1089	1.65e-104	TraesCS1A01G375600	chr1A	550311989	550314347	Heat shock transcription factor
		TRINITY_DN13064_c0_g1	10.5618	2.04e-80	1.67e-75	TraesCS3A01G274400.1	1897	1961	2742	4.71e-25	TraesCS3A01G274400	chr3A	503751786	503755145	Chaperone clpb, putative
		TRINITY_DN1603_c1_g2	10.5243	8.9e-53	1.93e-49	TraesCSU01G194600.1	355	456	456	3.95e-35	TraesCSU01G194600	chrUn	291905673	291906521	Heat shock protein
		TRINITY_DN1711_c0_g1	10.134	4.47e-60	2.45e-56	TraesCS4A01G092700.1	1	115	468	1.44e-52	TraesCS4A01G092700	chr4A	100102028	100102737	Heat-shock protein
		TRINITY_DN17251_c0_g1	10.0154	4.52e-43	4.46e-40	TraesCS3D01G045500.1	257	456	456	2.62e-93	TraesCS3D01G045500	chr3D	17391738	17392193	Heat shock protein
		TRINITY_DN37726_c2_g1	9.95511	5.31e-07	8.46e-06	TraesCS7A01G270100.1	1094	880	1125	3.66e-106	TraesCS7A01G270100	chr7A	276184867	276186319	Heat shock transcription factor
		TRINITY_DN133181_c5_g1	9.90166	7.66e-13	3.9e-11	TraesCS5D01G393200.1	1134	946	1134	4.23e-82	TraesCS5D01G393200	chr5D	461439693	461440998	Heat shock transcription factor
		TRINITY_DN2854_c0_g2	9.85686	1.06e-09	3.07e-08	TraesCS2D01G399000.1	846	454	915	0	TraesCS2D01G399000	chr2D	512042264	512043264	Heat shock transcription factor
		TRINITY_DN6139_c0_g2	9.83069	3.81e-45	4.48e-42	TraesCS3D01G351900.1	1752	1959	1959	5.67e-90	TraesCS3D01G351900	chr3D	462850049	462852773	70 kDa heat shock protein
		TRINITY_DN126_c1_g1	9.81338	1.04e-74	2.85e-70	TraesCS3D01G045700.1	316	456	456	1.49e-58	TraesCS3D01G045700	chr3D	17413454	17413909	Heat shock protein
		TRINITY_DN8393_c4_g1	9.79852	2.11e-43	2.18e-40	TraesCS3D01G045500.1	355	72	456	1.33e-146	TraesCS3D01G045500	chr3D	17391738	17392193	Heat shock protein
		TRINITY_DN6554_c0_g2	9.67697	6e-40	4.76e-37	TraesCSU01G047300.1	1	393	621	6.86e-142	TraesCSU01G047300	chrUn	37338311	37338931	Heat shock protein
		TRINITY_DN8503_c0_g2	9.58858	5.37e-24	1.01e-21	TraesCS5A01G482400.1	99	161	1146	1.37e-25	TraesCS5A01G482400	chr5A	654086402	654090003	Hsp70 nucleotide exchange factor fes1
		TRINITY_DN59338_c0_g2	9.33816	2.78e-29	8.91e-27	TraesCS7A01G161000.1	422	494	744	1.16e-21	TraesCS7A01G161000	chr7A	117346258	117347900	10 kDa chaperonin
		TRINITY_DN21777_c0_g1	9.31924	6.98e-21	9.85e-19	TraesCS2D01G383600.1	825	879	1719	9.62e-21	TraesCS2D01G383600	chr2D	488217560	488220476	Hsp70-Hsp90 organizing protein 1
		TRINITY_DN112513_c0_g1	9.03982	9.84e-41	8.34e-38	TraesCS1B01G151300.1	1443	1655	2061	5.16e-102	TraesCS1B01G151300	chr1B	236957822	236963066	Chaperone DnaK
		TRINITY_DN43367_c0_g1	8.97964	2.56e-61	1.76e-57	TraesCS3D01G046300.1	20	254	456	1.86e-114	TraesCS3D01G046300	chr3D	17556434	17557122	Heat shock protein
		TRINITY_DN187431_c0_g1	8.90977	4.21e-09	1.09e-07	TraesCS4B01G307700.1	137	196	1731	1.16e-23	TraesCS4B01G307700	chr4B	597970171	597974800	60 kDa chaperonin
		TRINITY_DN6473_c0_g1	8.90947	2.92e-51	5.86e-48	TraesCS3D01G273600.1	1541	1921	2742	0	TraesCS3D01G273600	chr3D	379536248	379539614	Chaperone clpb, putative
		TRINITY_DN1268_c0_g1	8.83179	2.69e-36	1.48e-33	TraesCS4A01G226700.1	1	747	747	0	TraesCS4A01G226700	chr4A	534811309	534812238	Heat-shock protein, putative
		TRINITY_DN13845_c0_g1	8.79861	2.5e-49	4.47e-46	TraesCS3B01G131300.1	300	489	489	1.6e-95	TraesCS3B01G131300	chr3B	113512069	113512557	Heat-shock protein, putative
		TRINITY_DN9202_c0_g1	8.63099	1.34e-42	1.27e-39	TraesCS5D01G305500.1	96	197	1827	5.98e-42	TraesCS5D01G305500	chr5D	400295411	400297237	Heat shock 70 kDa protein
		TRINITY_DN528_c0_g1	8.5909	1.08e-31	4.12e-29	TraesCS2A01G033700.1	1943	2124	2124	5.05e-83	TraesCS2A01G033700	chr2A	15001869	15004471	Heat shock protein 90
		TRINITY_DN56840_c0_g1	8.55963	7.06e-16	5.6e-14	TraesCS5A01G314700.1	1146	1189	1191	1.54e-14	TraesCS5A01G314700	chr5A	525078041	525079362	Heat shock transcription factor
		TRINITY_DN12920_c1_g1	8.55603	3.11e-33	1.32e-30	TraesCS4A01G098600.1	485	756	2010	1.27e-136	TraesCS4A01G098600	chr4A	110636564	110639356	70 kDa heat shock protein
		TRINITY_DN71339_c0_g1	8.5486	2.93e-07	5e-06	TraesCS6B01G374200.1	423	531	531	1.28e-37	TraesCS6B01G374200	chr6B	647350572	647387339	Heat-shock protein, putative
		TRINITY_DN94499_c0_g1	8.52022	3.57e-07	5.97e-06	TraesCS1D01G047800.1	251	321	516	8.68e-30	TraesCS1D01G047800	chr1D	27857982	27861572	Major heat shock 70 kDa protein Ab
		TRINITY_DN437_c1_g1	8.50088	8.28e-64	7.57e-60	TraesCS3D01G351900.1	214	615	1959	0	TraesCS3D01G351900	chr3D	462850049	462852773	70 kDa heat shock protein
		TRINITY_DN14997_c0_g1	8.44285	3.61e-32	1.4e-29	TraesCS6B01G058300.1	1	50	1998	6.15e-18	TraesCS6B01G058300	chr6B	38763526	38767358	Heat shock 70 kDa protein
		TRINITY_DN4776_c0_g2	8.37532	5.5e-40	4.43e-37	TraesCS4D01G145500.1	1	164	489	2.69e-78	TraesCS4D01G145500	chr4D	134549769	134550477	Heat shock protein
		TRINITY_DN13029_c0_g2	8.37289	1.54e-28	4.62e-26	TraesCS4B01G205700.1	1873	1972	1974	1.29e-45	TraesCS4B01G205700	chr4B	437949085	437951192	70 kDa heat shock protein
		TRINITY_DN133181_c3_g1	8.323	1.58e-38	1.04e-35	TraesCS5A01G383800.1	524	373	1119	3.86e-67	TraesCS5A01G383800	chr5A	581487008	581488298	Heat shock transcription factor
		TRINITY_DN20098_c0_g1	8.24035	1.26e-56	4.52e-53	TraesCS3D01G273600.2	2434	2688	2688	2.99e-130	TraesCS3D01G273600	chr3D	379536248	379539614	Chaperone clpb, putative
		TRINITY_DN2891_c0_g1	8.22908	2.57e-54	6.83e-51	TraesCS6A01G181700.1	1	793	795	0	TraesCS6A01G181700	chr6A	208383858	208384740	Heat shock protein
		TRINITY_DN36949_c0_g1	8.21916	1.27e-63	1.05e-59	TraesCS4D01G212300.1	371	474	474	3.17e-46	TraesCS4D01G212300	chr4D	365217434	365218278	Heat shock protein
		TRINITY_DN160554_c0_g1	8.14708	5.93e-18	6.04e-16	TraesCS3D01G046700.1	59	308	456	9.35e-118	TraesCS3D01G046700	chr3D	17591725	17592180	Heat shock protein
		TRINITY_DN334_c0_g2	8.1181	9.07e-39	6.17e-36	TraesCS4D01G012500.1	262	91	321	7.32e-85	TraesCS4D01G012500	chr4D	5784698	5785018	Dehydrin family protein, expressed
		TRINITY_DN17157_c0_g1	8.01089	7.7e-29	2.36e-26	TraesCS2B01G404400.1	1065	1184	1731	4.16e-57	TraesCS2B01G404400	chr2B	572554778	572557919	Hsp70-Hsp90 organizing protein 1
		TRINITY_DN32022_c0_g1	7.98557	1.64e-31	6.12e-29	TraesCS2D01G033200.1	903	526	2133	0	TraesCS2D01G033200	chr2D	12882738	12885228	Heat shock protein 90
		TRINITY_DN8393_c1_g1	7.88866	5.34e-50	1.02e-46	TraesCS3D01G045500.1	349	456	456	1.48e-50	TraesCS3D01G045500	chr3D	17391738	17392193	Heat shock protein
		TRINITY_DN14168_c1_g1	7.88388	6.67e-48	1.02e-44	TraesCS4D01G212300.1	1	61	474	3.18e-24	TraesCS4D01G212300	chr4D	365217434	365218278	Heat shock protein
		TRINITY_DN15705_c0_g1	7.85878	1.76e-26	4.1e-24	TraesCS6A01G042600.1	1180	1255	1998	9.71e-33	TraesCS6A01G042600	chr6A	22442891	22446356	Heat shock 70 kDa protein
		TRINITY_DN414_c0_g1	7.85459	4.72e-54	1.21e-50	TraesCS6D01G322300.1	419	540	540	1.57e-53	TraesCS6D01G322300	chr6D	429383365	429383997	Heat-shock protein, putative
		TRINITY_DN126_c0_g1	7.83294	1.05e-39	7.83e-37	TraesCS4D01G213100.1	346	474	474	8.61e-60	TraesCS4D01G213100	chr4D	365864520	365864993	Heat-shock protein, putative
		TRINITY_DN6476_c0_g1	7.76672	9.46e-55	2.59e-51	TraesCS3D01G114800.1	1	489	489	0	TraesCS3D01G114800	chr3D	68273803	68274291	Heat-shock protein, putative
		TRINITY_DN1205_c0_g1	7.76111	4.48e-36	2.41e-33	TraesCS5D01G393200.1	993	1134	1134	2.24e-67	TraesCS5D01G393200	chr5D	461439693	461440998	Heat shock transcription factor
		TRINITY_DN13694_c0_g1	7.68705	2.41e-27	6.27e-25	TraesCS3B01G390700.1	707	912	1959	2.13e-103	TraesCS3B01G390700	chr3B	615748962	615751502	70 kDa heat shock protein
		TRINITY_DN14165_c0_g1	7.67986	2.47e-45	2.95e-42	TraesCS4D01G206600.1	737	1239	1974	0	TraesCS4D01G206600	chr4D	354136050	354138155	70 kDa heat shock protein
		TRINITY_DN19647_c0_g1	7.60806	2.14e-31	7.94e-29	TraesCS2D01G033200.1	1320	1773	2133	0	TraesCS2D01G033200	chr2D	12882738	12885228	Heat shock protein 90
		NA	7.57275	1.63e-60	9.6e-57	NA	NA	NA	NA	NA	NA	NA	NA	NA	NA
		TRINITY_DN16652_c0_g1	7.55864	8.16e-39	5.64e-36	TraesCS3A01G113000.1	1	232	489	4.14e-104	TraesCS3A01G113000	chr3A	80288788	80289478	Heat-shock protein, putative
		TRINITY_DN616_c0_g1	7.49626	8.65e-20	1.09e-17	TraesCS4B01G243400.1	1618	1743	1743	2.53e-60	TraesCS4B01G243400	chr4B	504934572	504936314	Heat shock 70 kDa protein
		TRINITY_DN17545_c0_g1	7.4631	9.57e-20	1.19e-17	TraesCS4B01G243400.1	1203	1484	1743	3.63e-147	TraesCS4B01G243400	chr4B	504934572	504936314	Heat shock 70 kDa protein
		TRINITY_DN11974_c0_g1	7.46235	7.55e-27	1.84e-24	TraesCS3B01G390700.1	1818	1426	1959	0	TraesCS3B01G390700	chr3B	615748962	615751502	70 kDa heat shock protein
		TRINITY_DN1603_c0_g1	7.43122	1.12e-38	7.58e-36	TraesCS4D01G213100.1	1	469	474	0	TraesCS4D01G213100	chr4D	365864520	365864993	Heat-shock protein, putative
		TRINITY_DN14627_c0_g1	7.40929	5.08e-21	7.26e-19	TraesCS6D01G049100.1	676	777	1998	3.57e-47	TraesCS6D01G049100	chr6D	23832974	23836459	Heat shock 70 kDa protein
		TRINITY_DN8393_c4_g2	7.39928	3.86e-28	1.1e-25	TraesCS4A01G092600.1	411	93	468	1.15e-147	TraesCS4A01G092600	chr4A	99913715	99914182	Heat-shock protein
		TRINITY_DN34031_c0_g1	7.38588	8.92e-53	1.93e-49	TraesCS3A01G113100.1	139	480	480	2.35e-160	TraesCS3A01G113100	chr3A	80413047	80413827	Heat shock protein
		TRINITY_DN7672_c0_g1	7.38381	1.57e-59	8.07e-56	TraesCS1A01G395300.1	605	681	1119	1.39e-32	TraesCS1A01G395300	chr1A	560960168	560962700	Chaperone protein dnaJ
		TRINITY_DN26392_c0_g2	7.30165	7.41e-50	1.39e-46	TraesCS4B01G211600.1	156	474	474	2.47e-151	TraesCS4B01G211600	chr4B	449928126	449929253	Heat-shock protein
		TRINITY_DN11519_c0_g1	7.24145	2.96e-31	1.09e-28	TraesCS3B01G130300.1	205	489	489	8.97e-139	TraesCS3B01G130300	chr3B	112464964	112465703	Heat shock protein
		TRINITY_DN4010_c0_g1	7.23752	1.47e-41	1.3e-38	TraesCS3D01G273600.1	1	2742	2742	0	TraesCS3D01G273600	chr3D	379536248	379539614	Chaperone clpb, putative
		TRINITY_DN63908_c0_g1	7.22522	1.42e-26	3.35e-24	TraesCS5B01G249000.1	276	450	1614	6.53e-79	TraesCS5B01G249000	chr5B	431074368	431078699	Chaperone protein htpG family protein
		TRINITY_DN84051_c0_g1	7.204	7.44e-43	7.11e-40	TraesCS3A01G113000.1	432	489	489	1.48e-22	TraesCS3A01G113000	chr3A	80288788	80289478	Heat-shock protein, putative
		TRINITY_DN2765_c3_g1	7.1573	1.97e-25	4.23e-23	TraesCS1A01G120100.1	1128	1172	1686	7.09e-15	TraesCS1A01G120100	chr1A	132481070	132485645	70 kDa heat shock protein
		TRINITY_DN313_c0_g1	7.15057	3.26e-33	1.38e-30	TraesCS5D01G266000.1	220	744	744	0	TraesCS5D01G266000	chr5D	370310980	370311837	Heat shock protein, putative
		TRINITY_DN3852_c2_g1	7.08319	9.13e-40	6.89e-37	TraesCS1B01G139500.1	1466	1522	2499	4.72e-17	TraesCS1B01G139500	chr1B	183478959	183484632	70 kDa heat shock protein
		TRINITY_DN24388_c0_g1	7.03952	1.46e-39	1.06e-36	TraesCS3D01G273600.1	572	1120	2742	0	TraesCS3D01G273600	chr3D	379536248	379539614	Chaperone clpb, putative
		TRINITY_DN30471_c0_g1	7.00608	7.89e-53	1.8e-49	TraesCS1B01G139500.1	2214	2294	2499	1.56e-35	TraesCS1B01G139500	chr1B	183478959	183484632	70 kDa heat shock protein
		TRINITY_DN35628_c0_g1	6.99924	2.01e-37	1.2e-34	TraesCS2A01G386800.1	1269	1330	1734	6.75e-25	TraesCS2A01G386800	chr2A	632604588	632607489	Hsp70-Hsp90 organizing protein 1
		TRINITY_DN14061_c0_g1	6.94251	8.43e-39	5.78e-36	TraesCS2A01G033700.1	278	567	2124	1.71e-144	TraesCS2A01G033700	chr2A	15001869	15004471	Heat shock protein 90
		TRINITY_DN4776_c0_g4	6.93503	9.56e-36	4.98e-33	TraesCS3D01G115100.1	251	1	480	6.58e-57	TraesCS3D01G115100	chr3D	68389095	68389856	Heat shock protein
		TRINITY_DN8666_c0_g2	6.93166	8.36e-26	1.85e-23	TraesCS2A01G386800.1	1569	1734	1734	7.1e-79	TraesCS2A01G386800	chr2A	632604588	632607489	Hsp70-Hsp90 organizing protein 1
		TRINITY_DN4786_c0_g2	6.91651	6.96e-11	2.53e-09	TraesCS1D01G382900.1	151	1	1095	3.01e-74	TraesCS1D01G382900	chr1D	457849896	457852204	Heat shock transcription factor
		TRINITY_DN6476_c2_g1	6.84498	4.05e-36	2.21e-33	TraesCS3B01G130500.1	460	489	489	3.17e-07	TraesCS3B01G130500	chr3B	112835317	112836128	Heat shock protein
		TRINITY_DN5643_c0_g2	6.81851	1.44e-29	4.71e-27	TraesCS6B01G374100.1	372	27	537	1.57e-166	TraesCS6B01G374100	chr6B	646946222	646946873	Heat-shock protein, putative
		TRINITY_DN2863_c0_g1	6.78507	1.84e-26	4.28e-24	TraesCS2B01G531300.1	406	531	531	3.3e-60	TraesCS2B01G531300	chr2B	726684952	726686605	Heat-shock protein, putative
		TRINITY_DN80660_c0_g1	6.7386	1.07e-27	2.88e-25	TraesCS1A01G120100.3	1168	1266	2298	2.47e-45	TraesCS1A01G120100	chr1A	132481070	132485645	70 kDa heat shock protein
		TRINITY_DN4776_c0_g1	6.70252	1.87e-43	1.95e-40	TraesCS3D01G115100.1	1	119	480	6.93e-55	TraesCS3D01G115100	chr3D	68389095	68389856	Heat shock protein
		TRINITY_DN20010_c0_g1	6.68646	2.51e-27	6.53e-25	TraesCS1A01G120100.3	1805	1875	2298	5.43e-30	TraesCS1A01G120100	chr1A	132481070	132485645	70 kDa heat shock protein
		TRINITY_DN2490_c0_g2	6.65991	1.51e-31	5.68e-29	TraesCS1B01G294300.1	146	211	1947	5.41e-27	TraesCS1B01G294300	chr1B	512172902	512175830	70 kDa heat shock protein
		TRINITY_DN39762_c0_g1	6.63731	7.5e-42	6.93e-39	TraesCS3D01G114800.1	260	489	489	2.53e-108	TraesCS3D01G114800	chr3D	68273803	68274291	Heat-shock protein, putative
		TRINITY_DN25058_c0_g1	6.52042	5.91e-23	1.02e-20	TraesCS7A01G202200.1	1	417	417	0	TraesCS7A01G202200	chr7A	163916538	163916954	Heat-shock protein, putative
		TRINITY_DN15091_c0_g2	6.51726	1.43e-33	6.36e-31	TraesCS4A01G092100.1	1	128	477	8.9e-60	TraesCS4A01G092100	chr4A	98785516	98785992	Heat-shock protein, putative
		TRINITY_DN6288_c0_g1	6.38803	1.03e-40	8.62e-38	TraesCS1D01G131800.1	1190	1254	2049	1.08e-26	TraesCS1D01G131800	chr1D	155728817	155734791	Chaperone DnaK
		TRINITY_DN2854_c0_g1	6.37071	1.38e-24	2.7e-22	TraesCS2D01G399000.1	214	915	915	0	TraesCS2D01G399000	chr2D	512042264	512043264	Heat shock transcription factor
		TRINITY_DN5643_c0_g1	6.32694	8.14e-42	7.44e-39	TraesCS6B01G374100.1	1	533	537	0	TraesCS6B01G374100	chr6B	646946222	646946873	Heat-shock protein, putative
		TRINITY_DN5934_c0_g1	6.30957	5.62e-38	3.48e-35	TraesCS3D01G114900.1	404	489	489	2.75e-37	TraesCS3D01G114900	chr3D	68325091	68325579	Heat-shock protein, putative
		TRINITY_DN26873_c0_g1	6.30906	2.44e-25	5.17e-23	TraesCS7B01G083500.1	455	701	702	1.64e-127	TraesCS7B01G083500	chr7B	94263847	94264657	Heat-shock protein, putative
		TRINITY_DN14156_c0_g1	6.25582	5.68e-37	3.29e-34	TraesCS5A01G260600.1	67	127	1899	3.04e-24	TraesCS5A01G260600	chr5A	474541564	474544822	Heat shock protein 90
		TRINITY_DN53595_c0_g1	6.24662	9.08e-05	0.000827162	TraesCS1A01G120100.3	1895	1958	2298	5.24e-26	TraesCS1A01G120100	chr1A	132481070	132485645	70 kDa heat shock protein
		TRINITY_DN18131_c0_g1	6.2404	3.12e-28	8.94e-26	TraesCS5B01G192500.1	1	489	489	0	TraesCS5B01G192500	chr5B	347677510	347677998	Chaperone protein DNAj, putative
		TRINITY_DN12551_c0_g1	6.22043	6.68e-39	4.7e-36	TraesCS6D01G295500.2	1	648	648	0	TraesCS6D01G295500	chr6D	406334688	406335462	Heat-shock protein, putative
		TRINITY_DN16652_c0_g2	6.16424	2.11e-37	1.25e-34	TraesCS4D01G145600.1	181	1	489	4.45e-91	TraesCS4D01G145600	chr4D	134563191	134563966	Heat shock protein
		TRINITY_DN414_c0_g2	6.12126	3.03e-33	1.29e-30	TraesCS6D01G322300.1	419	540	540	8.65e-54	TraesCS6D01G322300	chr6D	429383365	429383997	Heat-shock protein, putative
		TRINITY_DN10014_c0_g1	6.09666	1.29e-27	3.44e-25	TraesCS4B01G205700.1	226	618	1974	0	TraesCS4B01G205700	chr4B	437949085	437951192	70 kDa heat shock protein
		TRINITY_DN26392_c1_g1	6.07323	2.03e-25	4.32e-23	TraesCS4B01G212200.1	382	474	474	2.99e-37	TraesCS4B01G212200	chr4B	450482702	450483365	Heat-shock protein, putative
		TRINITY_DN23961_c0_g2	6.05818	1.26e-27	3.39e-25	TraesCS7A01G159600.1	70	419	717	7.29e-180	TraesCS7A01G159600	chr7A	115903779	115904909	Chaperone protein dnaJ
		TRINITY_DN14168_c0_g1	6.04476	1.13e-31	4.28e-29	TraesCS4B01G212300.1	1	333	468	3.16e-150	TraesCS4B01G212300	chr4B	450685882	450686349	Heat-shock protein, putative
		TRINITY_DN2397_c0_g1	6.01255	1.13e-46	1.58e-43	TraesCS1D01G284000.1	211	283	1845	2.49e-30	TraesCS1D01G284000	chr1D	382234639	382237640	70 kDa heat shock protein
		TRINITY_DN54525_c0_g1	5.93945	3.93e-28	1.11e-25	TraesCS1B01G423600.1	170	1	1137	1.49e-69	TraesCS1B01G423600	chr1B	646189334	646191991	Chaperone protein dnaJ
		TRINITY_DN34753_c0_g1	5.93322	3.21e-25	6.74e-23	TraesCS7A01G177600.1	9	214	648	6.42e-95	TraesCS7A01G177600	chr7A	130891811	130893814	Heat-shock protein, putative
		TRINITY_DN10366_c0_g2	5.9002	1.75e-16	1.51e-14	TraesCS2A01G401600.1	1	214	888	2.48e-109	TraesCS2A01G401600	chr2A	655218650	655219623	Heat stress transcription factor
		TRINITY_DN19185_c0_g3	5.81344	3.12e-25	6.57e-23	TraesCS2A01G386800.1	1614	1335	1734	2.18e-139	TraesCS2A01G386800	chr2A	632604588	632607489	Hsp70-Hsp90 organizing protein 1
		TRINITY_DN19185_c0_g1	5.79105	1.32e-30	4.59e-28	TraesCS2A01G386800.1	1492	1622	1734	2.68e-61	TraesCS2A01G386800	chr2A	632604588	632607489	Hsp70-Hsp90 organizing protein 1
		TRINITY_DN2230_c0_g1	5.78961	9.21e-28	2.5e-25	TraesCS1B01G423600.1	131	697	1137	0	TraesCS1B01G423600	chr1B	646189334	646191991	Chaperone protein dnaJ
		TRINITY_DN26873_c0_g3	5.78825	6.02e-40	4.76e-37	TraesCS6B01G346700.1	648	411	648	2.28e-119	TraesCS6B01G346700	chr6B	610808780	610809552	Heat-shock protein, putative
		TRINITY_DN19294_c0_g1	5.77207	1.44e-37	8.8e-35	TraesCS5A01G426100.1	55	153	1266	3.15e-43	TraesCS5A01G426100	chr5A	611339340	611341842	Chaperone protein dnaJ, putative
		TRINITY_DN2883_c0_g1	5.759	1.94e-35	9.93e-33	TraesCS7A01G159500.1	340	651	651	3.99e-161	TraesCS7A01G159500	chr7A	115867523	115868629	Chaperone protein dnaJ
		TRINITY_DN8666_c0_g1	5.71741	3e-28	8.64e-26	TraesCS2A01G386800.1	7	1734	1734	0	TraesCS2A01G386800	chr2A	632604588	632607489	Hsp70-Hsp90 organizing protein 1
		TRINITY_DN10803_c0_g1	5.71142	2.57e-15	1.89e-13	TraesCS2A01G386800.1	1	134	1734	4.43e-63	TraesCS2A01G386800	chr2A	632604588	632607489	Hsp70-Hsp90 organizing protein 1
		TRINITY_DN28730_c0_g1	5.70768	2.48e-21	3.67e-19	TraesCS5B01G495500.1	530	604	1146	4.41e-32	TraesCS5B01G495500	chr5B	662976884	662980348	Hsp70 nucleotide exchange factor fes1
		TRINITY_DN52481_c0_g2	5.67762	1.17e-09	3.36e-08	TraesCS7D01G162300.1	408	662	732	3.86e-98	TraesCS7D01G162300	chr7D	112322541	112324181	10 kDa chaperonin
		TRINITY_DN12330_c0_g2	5.62794	1.53e-28	4.59e-26	TraesCS2D01G033200.1	391	1211	2133	0	TraesCS2D01G033200	chr2D	12882738	12885228	Heat shock protein 90
		TRINITY_DN22284_c0_g3	5.52407	3.71e-19	4.33e-17	TraesCS2B01G404400.1	863	514	1731	7.46e-170	TraesCS2B01G404400	chr2B	572554778	572557919	Hsp70-Hsp90 organizing protein 1
		TRINITY_DN13029_c0_g1	5.42119	1.21e-19	1.5e-17	TraesCS4A01G098600.1	1452	2008	2010	0	TraesCS4A01G098600	chr4A	110636564	110639356	70 kDa heat shock protein
		TRINITY_DN9992_c0_g1	5.39796	4.08e-38	2.56e-35	TraesCS7A01G242200.1	480	549	2103	8.88e-29	TraesCS7A01G242200	chr7A	217555694	217559742	Heat shock protein 90
		TRINITY_DN32514_c1_g1	5.33952	0.00677677	0.0329445	TraesCS2B01G404400.1	232	448	1731	3.69e-111	TraesCS2B01G404400	chr2B	572554778	572557919	Hsp70-Hsp90 organizing protein 1
		TRINITY_DN12473_c0_g1	5.28964	1.06e-14	7.17e-13	TraesCS1A01G120100.1	1	65	1686	2.09e-26	TraesCS1A01G120100	chr1A	132481070	132485645	70 kDa heat shock protein
		TRINITY_DN31617_c0_g1	5.27696	3.5e-29	1.11e-26	TraesCS5B01G428000.1	394	464	1266	5.71e-30	TraesCS5B01G428000	chr5B	603954037	603956423	Chaperone protein dnaJ, putative
		TRINITY_DN161627_c0_g1	5.17476	6.98e-21	9.85e-19	TraesCS6D01G295500.1	232	1	651	1.14e-107	TraesCS6D01G295500	chr6D	406334688	406335462	Heat-shock protein, putative
		TRINITY_DN28000_c0_g2	5.03224	0.000174514	0.00147533	TraesCS5A01G237900.1	256	318	897	1.53e-25	TraesCS5A01G237900	chr5A	454397096	454401145	Heat stress transcription factor
		TRINITY_DN4786_c0_g1	4.99947	1.43e-17	1.4e-15	TraesCS1D01G382900.1	1	186	1095	9.1e-92	TraesCS1D01G382900	chr1D	457849896	457852204	Heat shock transcription factor
		TRINITY_DN3422_c1_g1	4.95817	1.81e-22	3.03e-20	TraesCS1A01G285000.1	1682	1845	1845	9.62e-81	TraesCS1A01G285000	chr1A	482335991	482338978	70 kDa heat shock protein
		TRINITY_DN2863_c0_g2	4.94904	2.01e-25	4.29e-23	TraesCS7D01G179000.1	558	642	642	1.65e-37	TraesCS7D01G179000	chr7D	132135777	132136539	Heat-shock protein, putative
		TRINITY_DN15612_c1_g1	4.93734	1.89e-22	3.15e-20	TraesCS2B01G047400.1	1	76	2139	1.11e-30	TraesCS2B01G047400	chr2B	23580771	23583241	Heat shock protein 90
		TRINITY_DN2903_c0_g1	4.92463	7.16e-20	9.15e-18	TraesCS1A01G375600.2	255	1107	1107	0	TraesCS1A01G375600	chr1A	550311989	550314347	Heat shock transcription factor
		TRINITY_DN99934_c0_g1	4.92381	0.00082181	0.00565473	TraesCS4A01G095500.2	243	287	1116	1.43e-13	TraesCS4A01G095500	chr4A	103724058	103726912	Hsp70 nucleotide exchange factor fes1
		TRINITY_DN2204_c0_g1	4.86705	6.64e-25	1.35e-22	TraesCS4D01G209700.1	283	1146	1146	0	TraesCS4D01G209700	chr4D	360953251	360956001	Hsp70 nucleotide exchange factor fes1
		TRINITY_DN14304_c0_g1	4.86556	1.76e-27	4.65e-25	TraesCS1D01G284000.1	482	990	1845	0	TraesCS1D01G284000	chr1D	382234639	382237640	70 kDa heat shock protein
		TRINITY_DN5770_c0_g1	4.86056	2.34e-32	9.13e-30	TraesCS7D01G232600.1	129	379	630	5.49e-110	TraesCS7D01G232600	chr7D	194129502	194130250	Heat-shock protein, putative
		TRINITY_DN58791_c0_g1	4.78143	3.59e-26	8.23e-24	TraesCS7A01G159500.1	189	1	651	9.29e-94	TraesCS7A01G159500	chr7A	115867523	115868629	Chaperone protein dnaJ
		TRINITY_DN8349_c0_g3	4.75326	6.83e-16	5.43e-14	TraesCS1D01G382900.1	560	337	1095	1.07e-111	TraesCS1D01G382900	chr1D	457849896	457852204	Heat shock transcription factor
		TRINITY_DN22904_c0_g1	4.74153	7.22e-27	1.76e-24	TraesCS7B01G130900.1	1	208	489	1.09e-92	TraesCS7B01G130900	chr7B	157808553	157809166	Heat-shock protein, putative
		TRINITY_DN10014_c1_g1	4.73673	1.2e-20	1.65e-18	TraesCS1B01G294300.1	427	669	1947	1.5e-115	TraesCS1B01G294300	chr1B	512172902	512175830	70 kDa heat shock protein
		TRINITY_DN268_c1_g1	4.73332	1.68e-10	5.66e-09	TraesCS7A01G270100.1	271	1	1125	2.56e-140	TraesCS7A01G270100	chr7A	276184867	276186319	Heat shock transcription factor
		TRINITY_DN29907_c0_g1	4.69661	9.88e-27	2.36e-24	TraesCS1A01G285000.1	211	415	1845	8.92e-103	TraesCS1A01G285000	chr1A	482335991	482338978	70 kDa heat shock protein
		TRINITY_DN6843_c0_g3	4.60865	1.87e-17	1.81e-15	TraesCS5B01G495500.1	948	1146	1146	9.02e-99	TraesCS5B01G495500	chr5B	662976884	662980348	Hsp70 nucleotide exchange factor fes1
		TRINITY_DN9992_c0_g2	4.59165	1.99e-22	3.32e-20	TraesCS7B01G149200.1	547	642	2103	1.54e-41	TraesCS7B01G149200	chr7B	196904882	196908870	Heat shock protein 90
		TRINITY_DN9202_c0_g2	4.56981	1.62e-17	1.58e-15	TraesCS4A01G097900.1	1	188	1956	3.12e-88	TraesCS4A01G097900	chr4A	109423673	109426774	70 kDa heat shock protein
		TRINITY_DN139419_c0_g2	4.54367	9.26e-13	4.64e-11	TraesCS1D01G382900.1	45	337	1095	3.1e-148	TraesCS1D01G382900	chr1D	457849896	457852204	Heat shock transcription factor
		TRINITY_DN14758_c1_g1	4.51014	8.84e-27	2.14e-24	TraesCS1A01G285000.1	177	1	1845	4.12e-82	TraesCS1A01G285000	chr1A	482335991	482338978	70 kDa heat shock protein
		TRINITY_DN3368_c0_g1	4.49374	2.32e-08	5.12e-07	TraesCS1A01G375600.1	275	339	1089	6.78e-23	TraesCS1A01G375600	chr1A	550311989	550314347	Heat shock transcription factor
		TRINITY_DN16292_c0_g1	4.45091	8.08e-18	8.1e-16	TraesCS5A01G482400.1	631	762	1146	1.89e-63	TraesCS5A01G482400	chr5A	654086402	654090003	Hsp70 nucleotide exchange factor fes1
		TRINITY_DN8481_c1_g1	4.4343	4.19e-19	4.83e-17	TraesCS1A01G285000.1	1058	1353	1845	1.43e-146	TraesCS1A01G285000	chr1A	482335991	482338978	70 kDa heat shock protein
		TRINITY_DN14275_c0_g2	4.39064	6.9e-15	4.8e-13	TraesCS5A01G479300.1	1691	1480	1947	2.58e-21	TraesCS5A01G479300	chr5A	652357716	652362145	70 kDa heat shock protein
		TRINITY_DN101549_c1_g1	4.37095	0.00073152	0.00511952	TraesCS6D01G221000.1	1182	1241	1734	8.27e-24	TraesCS6D01G221000	chr6D	311550392	311556115	Hsp70-Hsp90 organizing protein 1
		TRINITY_DN4063_c0_g1	4.35025	1e-17	9.92e-16	TraesCS4B01G278100.1	229	924	1026	0	TraesCS4B01G278100	chr4B	560012716	560014885	Heat shock transcription factor
		TRINITY_DN18009_c0_g1	4.34312	8.62e-23	1.47e-20	TraesCS7A01G242200.1	73	311	2103	2.42e-123	TraesCS7A01G242200	chr7A	217555694	217559742	Heat shock protein 90
		TRINITY_DN21637_c0_g2	4.29977	1.62e-15	1.22e-13	TraesCS1B01G294300.1	1794	1563	1947	1.95e-114	TraesCS1B01G294300	chr1B	512172902	512175830	70 kDa heat shock protein
		TRINITY_DN90702_c0_g1	4.29412	1.5e-25	3.24e-23	TraesCS5A01G482400.1	254	463	1146	2.5e-105	TraesCS5A01G482400	chr5A	654086402	654090003	Hsp70 nucleotide exchange factor fes1
		TRINITY_DN24259_c0_g2	4.26269	4.32e-22	6.94e-20	TraesCS1D01G284000.1	1	122	1845	4.28e-58	TraesCS1D01G284000	chr1D	382234639	382237640	70 kDa heat shock protein
		TRINITY_DN98454_c0_g1	4.13908	0.00791562	0.0373487	TraesCS4A01G315500.1	567	630	1746	4.38e-26	TraesCS4A01G315500	chr4A	605656378	605659792	60 kDa chaperonin
		TRINITY_DN14275_c0_g1	4.12284	1.19e-12	5.86e-11	TraesCS5A01G479300.1	31	1691	1947	1.15e-85	TraesCS5A01G479300	chr5A	652357716	652362145	70 kDa heat shock protein
		TRINITY_DN26873_c0_g4	4.09145	2.12e-16	1.82e-14	TraesCS2B01G531300.1	1	426	531	0	TraesCS2B01G531300	chr2B	726684952	726686605	Heat-shock protein, putative
		TRINITY_DN129257_c0_g1	4.03979	7.74e-07	1.18e-05	TraesCS7D01G179400.1	1	308	633	1.65e-151	TraesCS7D01G179400	chr7D	132763678	132764425	Heat-shock protein, putative
		TRINITY_DN2359_c0_g2	4.03889	4.51e-17	4.16e-15	TraesCS7A01G242200.1	1930	2103	2103	2.3e-79	TraesCS7A01G242200	chr7A	217555694	217559742	Heat shock protein 90
		TRINITY_DN4049_c0_g1	4.0027	1.34e-22	2.26e-20	TraesCS1A01G120100.3	1463	1600	2298	8.94e-64	TraesCS1A01G120100	chr1A	132481070	132485645	70 kDa heat shock protein
		TRINITY_DN2736_c1_g1	3.96621	1.14e-21	1.75e-19	TraesCS7B01G149200.1	127	757	2103	0	TraesCS7B01G149200	chr7B	196904882	196908870	Heat shock protein 90
		TRINITY_DN24259_c0_g1	3.96208	6.25e-22	9.88e-20	TraesCS3B01G390700.1	10	179	1959	1.07e-84	TraesCS3B01G390700	chr3B	615748962	615751502	70 kDa heat shock protein
		TRINITY_DN8004_c0_g1	3.92041	5.69e-11	2.1e-09	TraesCS4A01G027700.1	1	115	1026	1.93e-52	TraesCS4A01G027700	chr4A	19620363	19622625	Heat shock transcription factor
		TRINITY_DN202_c1_g1	3.91043	3.22e-19	3.79e-17	TraesCS5A01G482400.1	631	1146	1146	0	TraesCS5A01G482400	chr5A	654086402	654090003	Hsp70 nucleotide exchange factor fes1
		TRINITY_DN8349_c0_g1	3.90954	2.42e-08	5.32e-07	TraesCS1B01G396000.2	2	174	951	3.86e-75	TraesCS1B01G396000	chr1B	627926916	627929186	Heat shock transcription factor
		TRINITY_DN268_c0_g1	3.90677	2.55e-17	2.43e-15	TraesCS7B01G168300.2	268	1125	1125	0	TraesCS7B01G168300	chr7B	235448977	235450208	Heat shock transcription factor
		TRINITY_DN30471_c1_g1	3.89248	5.5e-09	1.38e-07	TraesCS1B01G139500.1	2412	2499	2499	2.43e-34	TraesCS1B01G139500	chr1B	183478959	183484632	70 kDa heat shock protein
		TRINITY_DN10366_c0_g3	3.82596	7.8e-13	3.96e-11	TraesCS7A01G270100.1	1	317	1125	1.59e-159	TraesCS7A01G270100	chr7A	276184867	276186319	Heat shock transcription factor
		TRINITY_DN67694_c0_g1	3.80257	5.25e-11	1.95e-09	TraesCS4A01G027700.1	540	756	1026	1.72e-109	TraesCS4A01G027700	chr4A	19620363	19622625	Heat shock transcription factor
		TRINITY_DN53385_c0_g1	3.74497	3.93e-16	3.25e-14	TraesCS7A01G242200.1	1390	1623	2103	1.45e-115	TraesCS7A01G242200	chr7A	217555694	217559742	Heat shock protein 90
		TRINITY_DN16494_c0_g1	3.66201	3.16e-09	8.35e-08	TraesCS4A01G027700.1	313	510	1026	2.07e-100	TraesCS4A01G027700	chr4A	19620363	19622625	Heat shock transcription factor
		TRINITY_DN37726_c1_g1	3.64054	2.41e-11	9.5e-10	TraesCS7A01G270100.1	569	271	1125	6.46e-155	TraesCS7A01G270100	chr7A	276184867	276186319	Heat shock transcription factor
		TRINITY_DN22284_c0_g2	3.55857	1.75e-06	2.43e-05	TraesCS6A01G238600.1	905	1110	1746	4.24e-104	TraesCS6A01G238600	chr6A	448225062	448230638	Hsp70-Hsp90 organizing protein 1
		TRINITY_DN105416_c1_g1	3.55727	1.95e-16	1.67e-14	TraesCS7B01G149200.1	1205	1452	2103	1.17e-121	TraesCS7B01G149200	chr7B	196904882	196908870	Heat shock protein 90
		TRINITY_DN30471_c0_g2	3.54333	6.16e-13	3.22e-11	TraesCS1D01G121000.1	2459	2294	2508	3.65e-81	TraesCS1D01G121000	chr1D	120533623	120538939	70 kDa heat shock protein
		TRINITY_DN122376_c0_g1	3.50164	1e-05	0.000113755	TraesCS5B01G563900.1	1227	1282	1569	1.09e-21	TraesCS5B01G563900	chr5B	709426415	709429855	60 kDa chaperonin
		TRINITY_DN7009_c0_g2	3.38027	5.2e-07	8.3e-06	TraesCS3B01G323800.1	111	214	1326	6.77e-48	TraesCS3B01G323800	chr3B	524325411	524327639	Heat shock transcription factor
		TRINITY_DN39891_c0_g1	3.37445	5.37e-12	2.37e-10	TraesCS5D01G093900.1	1423	1736	1944	1.48e-156	TraesCS5D01G093900	chr5D	103213394	103216909	70 kDa heat shock protein
		TRINITY_DN8489_c0_g1	3.36284	2.45e-06	3.26e-05	TraesCS6D01G049100.1	774	1988	1998	0	TraesCS6D01G049100	chr6D	23832974	23836459	Heat shock 70 kDa protein
		TRINITY_DN10451_c0_g1	3.16472	7.62e-13	3.88e-11	TraesCS5D01G321000.1	1	303	1194	2.6e-158	TraesCS5D01G321000	chr5D	413057751	413059074	Heat shock transcription factor
		TRINITY_DN41443_c0_g1	3.05894	0.000189312	0.0015848	TraesCS5A01G212500.1	458	630	831	2.32e-64	TraesCS5A01G212500	chr5A	427821884	427825381	10 kDa chaperonin
		TRINITY_DN437_c0_g1	2.95734	2.66e-11	1.04e-09	TraesCS1B01G294300.1	1	1947	1947	0	TraesCS1B01G294300	chr1B	512172902	512175830	70 kDa heat shock protein
		TRINITY_DN2359_c0_g1	2.94863	1.27e-09	3.64e-08	TraesCS2D01G033200.1	1095	2131	2133	0	TraesCS2D01G033200	chr2D	12882738	12885228	Heat shock protein 90
		TRINITY_DN59338_c0_g3	2.89648	2.42e-08	5.32e-07	TraesCS7A01G161000.1	571	647	744	2.37e-33	TraesCS7A01G161000	chr7A	117346258	117347900	10 kDa chaperonin
		TRINITY_DN58558_c0_g2	2.88002	0.000596212	0.00429797	TraesCS3B01G390800.1	328	582	1863	5.51e-52	TraesCS3B01G390800	chr3B	615771968	615774961	70 kDa heat shock protein
		TRINITY_DN26392_c0_g3	2.85761	2.2e-09	5.99e-08	TraesCS4D01G212200.1	486	454	486	2.62e-08	TraesCS4D01G212200	chr4D	365187811	365188977	Heat-shock protein
		TRINITY_DN101640_c0_g1	2.84523	2.32e-07	4.07e-06	TraesCS1B01G294300.1	459	720	1947	2.2e-64	TraesCS1B01G294300	chr1B	512172902	512175830	70 kDa heat shock protein
		TRINITY_DN69538_c0_g1	2.68281	0.00180916	0.0110568	TraesCS6A01G276700.1	2024	2084	2661	2.33e-24	TraesCS6A01G276700	chr6A	503761514	503767646	Heat shock 70 kDa protein, putative
		TRINITY_DN49453_c1_g1	2.65617	0.00878715	0.0406127	TraesCS5A01G078000.1	1278	1609	1944	2.35e-44	TraesCS5A01G078000	chr5A	95565480	95569011	70 kDa heat shock protein
		TRINITY_DN13871_c0_g1	2.59693	2.12e-08	4.71e-07	TraesCS5B01G211200.1	516	585	756	8.78e-29	TraesCS5B01G211200	chr5B	382076110	382080554	10 kDa chaperonin
		TRINITY_DN26701_c0_g3	2.53787	0.000439751	0.0033023	TraesCS2A01G146000.1	195	257	303	2.7e-23	TraesCS2A01G146000	chr2A	90740377	90742362	10 kDa chaperonin
		TRINITY_DN18201_c0_g1	2.4092	6.27e-13	3.27e-11	TraesCS5A01G314700.1	281	1191	1191	0	TraesCS5A01G314700	chr5A	525078041	525079362	Heat shock transcription factor
		TRINITY_DN2903_c0_g2	2.31569	3.47e-07	5.82e-06	TraesCS5A01G237900.1	1	301	897	1.24e-150	TraesCS5A01G237900	chr5A	454397096	454401145	Heat stress transcription factor
		TRINITY_DN3192_c0_g1	2.23284	3.39e-09	8.9e-08	TraesCS5B01G236400.1	202	897	897	0	TraesCS5B01G236400	chr5B	417438436	417443406	Heat stress transcription factor
		TRINITY_DN14649_c0_g1	2.17941	2.18e-05	0.000227593	TraesCS1B01G060200.1	106	522	522	0	TraesCS1B01G060200	chr1B	43629977	43631934	Heat shock 70 kDa protein
		TRINITY_DN12330_c0_g1	2.06508	7e-07	1.08e-05	TraesCS5D01G268000.1	4	296	2103	3.47e-141	TraesCS5D01G268000	chr5D	371469178	371472642	Heat shock protein 90
		TRINITY_DN38274_c0_g2	2.0572	7.73e-07	1.18e-05	TraesCS5B01G236400.1	1	273	897	8.66e-134	TraesCS5B01G236400	chr5B	417438436	417443406	Heat stress transcription factor
		TRINITY_DN2762_c0_g1	2.04285	2.6e-06	3.44e-05	TraesCS1B01G139500.1	1	1866	2499	0	TraesCS1B01G139500	chr1B	183478959	183484632	70 kDa heat shock protein
