# Supplementary material for: Insight into the mechanisms of terminal HS-tolerance in wheat mutant with improved nutritional quality through de novo transcriptome sequencing
Source: Research Square preprint supplement (doi:10.21203/rs.3.rs-241832/v1), 2021-02-26
Supplement: Supplementary file 14 [file bf889a357c368ff9686fedde.xlsx]

## Sheet: Sheet1
		Insight into the mechanisms of terminal HS-tolerance in wheat mutant with improved nutritional quality through de novo transcriptome sequencing Ranjeet R. Kumar, Suman Bakshi, Kavita Dubey, Sumedha Hasija, Gyanendra K. Rai, Neelu Jain, Sanjay Jambhulkar, Bhupinder Singh, Gyanendra P. Singh, & Shelly Praveen
		Table S13 List of differentially expressed transcripts involved in signalling cascade in wheat mutant identified using de novo transcriptomic approach
		Trinity_GeneID	logFC	PValue	FDR	Wheat_Transcript_ID	Transcript_Start	Transcript_End	Transcript length	E value	Wheat_Gene_ID	Chromosome	Gene_Start	Gene_End	Description/Protein Name
		TRINITY_DN426_c0_g2	12.5458	4.71e-38	4.31e-35	TraesCS7D01G543700.1	1559	1650	1650	9.18e-40	TraesCS7D01G543700	chr7D	631998137	632001532	Signal peptide peptidase-like protein
		TRINITY_DN24416_c0_g1	11.4327	6.45e-22	1.02e-19	TraesCS2A01G093200.1	111	1	237	4.98e-42	TraesCS2A01G093200	chr2A	47349311	47349547	Sarcoplasmic/endoplasmic reticulum calcium ATPase 3
		TRINITY_DN24416_c0_g1	11.3383	7.21e-20	7.03e-18	TraesCS2A01G093200.1	111	1	237	4.98e-42	TraesCS2A01G093200	chr2A	47349311	47349547	Sarcoplasmic/endoplasmic reticulum calcium ATPase 3
		TRINITY_DN9220_c0_g2	9.89482	6.68e-10	2.02e-08	TraesCS5A01G262400.1	327	1	414	1.87e-163	TraesCS5A01G262400	chr5A	475632764	475633379	Calcium-binding EF-hand family protein-like
		TRINITY_DN14736_c0_g1	9.8935	6.61e-13	2.22e-11	TraesCS7A01G134000.1	1	120	774	1.66e-55	TraesCS7A01G134000	chr7A	85901499	85903086	Calcium-binding EF-hand
		TRINITY_DN20772_c0_g1	9.84145	1.58e-12	5e-11	TraesCS6A01G413700.1	761	982	2028	6.29e-114	TraesCS6A01G413700	chr6A	614645391	614650680	Calcium-dependent lipid-binding (CaLB domain) family protein
		TRINITY_DN17718_c0_g1	9.49052	1.24e-11	3.29e-10	TraesCS2D01G018800.1	600	1034	1266	9.14e-55	TraesCS2D01G018800	chr2D	8888969	8891101	calcium-dependent lipid-binding family protein
		TRINITY_DN37965_c0_g2	9.32649	2.45e-12	7.44e-11	TraesCSU01G133200.1	2505	2766	4350	2.45e-64	TraesCSU01G133200	chrUn	112600697	112619193	Mitogen-activated protein kinase kinase
		TRINITY_DN228687_c0_g1	9.23969	2.37e-11	5.95e-10	TraesCS2D01G534300.1	1	64	312	5.2e-26	TraesCS2D01G534300	chr2D	618136562	618137627	Calcium-binding mitochondrial carrier protein SCaMC-1
		TRINITY_DN112133_c0_g2	9.12295	1.72e-08	2.36e-07	TraesCS5B01G117300.1	52	1	663	4.16e-15	TraesCS5B01G117300	chr5B	206757736	206763832	Calcium-dependent lipid-binding domain-containing protein
		TRINITY_DN63084_c0_g1	8.85751	3.43e-09	5.54e-08	TraesCS7D01G417900.1	417	687	1431	4.53e-141	TraesCS7D01G417900	chr7D	536976187	536982524	Calcium-binding mitochondrial carrier protein SCaMC-2
		TRINITY_DN112843_c0_g1	8.59804	4.81e-07	7.75e-06	TraesCS1D01G433400.1	1129	1199	1383	5.45e-30	TraesCS1D01G433400	chr1D	482836278	482840689	Calcium-dependent protein kinase
		TRINITY_DN112843_c0_g1	8.49976	2.9e-07	2.86e-06	TraesCS1D01G433400.1	1129	1199	1383	5.45e-30	TraesCS1D01G433400	chr1D	482836278	482840689	Calcium-dependent protein kinase
		TRINITY_DN125951_c0_g1	8.45673	3.8e-07	3.64e-06	TraesCS2A01G057900.1	459	694	1137	2.5e-48	TraesCS2A01G057900	chr2A	24300484	24301620	Calcium-dependent lipid-binding (CaLB domain) family protein
		TRINITY_DN7556_c0_g1	8.42328	4.6e-71	5.41e-67	TraesCS5D01G269400.1	1	417	417	0	TraesCS5D01G269400	chr5D	372454297	372454713	Calcium-binding EF-hand family protein-like
		TRINITY_DN19907_c0_g2	8.20566	3.81e-14	1.59e-12	TraesCS5B01G152400.1	606	1	606	0	TraesCS5B01G152400	chr5B	281644236	281644841	Calcium-binding protein
		TRINITY_DN19907_c0_g2	7.5249	2.05e-14	1.34e-12	TraesCS5B01G152400.1	606	1	606	0	TraesCS5B01G152400	chr5B	281644236	281644841	Calcium-binding protein
		TRINITY_DN24898_c0_g1	7.45542	9.17e-11	3.25e-09	TraesCS6B01G224600.1	6022	6088	12657	1.41e-26	TraesCS6B01G224600	chr6B	342982698	343044248	Calcium-dependent lipid-binding family protein isoform protein
		TRINITY_DN9220_c0_g1	7.38035	1.18e-22	1.67e-20	TraesCS5D01G270000.1	1	414	414	0	TraesCS5D01G270000	chr5D	373774151	373774564	Calcium-binding EF-hand family protein-like
		TRINITY_DN111_c2_g1	7.37754	1.57e-07	2.88e-06	TraesCS6A01G115400.1	351	589	903	2.42e-123	TraesCS6A01G115400	chr6A	85261630	85262743	Calcium-dependent lipid-binding (CaLB domain) family
		TRINITY_DN19907_c0_g1	7.09833	3.51e-27	8.54e-25	TraesCS5B01G152400.1	1	606	606	0	TraesCS5B01G152400	chr5B	281644236	281644841	Calcium-binding protein
		TRINITY_DN43441_c0_g1	7.04098	1.05e-05	0.000118275	TraesCS7A01G183100.1	689	750	1716	1.2e-24	TraesCS7A01G183100	chr7A	138154890	138159887	Sodium/calcium exchanger family protein / calcium-binding EF hand family protein
		TRINITY_DN39538_c1_g2	6.72217	2.85e-05	0.000290371	TraesCS6A01G115400.1	501	778	903	1.68e-130	TraesCS6A01G115400	chr6A	85261630	85262743	Calcium-dependent lipid-binding (CaLB domain) family
		TRINITY_DN165150_c0_g1	6.63238	7.18e-08	1.42e-06	TraesCS6B01G224600.2	5537	5625	12414	8.49e-34	TraesCS6B01G224600	chr6B	342982698	343044248	Calcium-dependent lipid-binding family protein isoform protein
		TRINITY_DN57650_c2_g1	6.38254	2.49e-07	2.51e-06	TraesCS6A01G197400.1	2701	2598	12657	1.19e-45	TraesCS6A01G197400	chr6A	297625430	297717808	Calcium-dependent lipid-binding family protein isoform protein
		TRINITY_DN69574_c0_g2	6.25512	7.64e-15	5.28e-13	TraesCS6D01G104000.1	136	473	870	3.33e-163	TraesCS6D01G104000	chr6D	67569268	67570137	Calcium-dependent lipid-binding domain protein
		TRINITY_DN9220_c0_g1	6.23226	2.97e-28	8.57e-26	TraesCS5D01G270000.1	1	414	414	0	TraesCS5D01G270000	chr5D	373774151	373774564	Calcium-binding EF-hand family protein-like
		TRINITY_DN45820_c0_g3	6.21938	3.07e-07	3.02e-06	TraesCS7D01G184700.1	1430	1490	1737	1.31e-23	TraesCS7D01G184700	chr7D	138177170	138190198	Sodium/calcium exchanger family protein / calcium-binding EF hand family protein
		TRINITY_DN71873_c0_g2	6.18037	1.73e-12	8.29e-11	TraesCS6D01G182900.2	1677	1321	12261	0	TraesCS6D01G182900	chr6D	218383154	218453331	calcium-dependent lipid-binding family protein
		TRINITY_DN69574_c0_g2	6.1329	3.76e-18	2.86e-16	TraesCS6D01G104000.1	136	473	870	3.33e-163	TraesCS6D01G104000	chr6D	67569268	67570137	Calcium-dependent lipid-binding domain protein
		TRINITY_DN69574_c1_g1	5.96282	9.99e-09	1.45e-07	TraesCS6D01G104000.1	1	80	870	6.36e-35	TraesCS6D01G104000	chr6D	67569268	67570137	Calcium-dependent lipid-binding domain protein
		TRINITY_DN39538_c1_g2	5.91298	2.28e-09	3.82e-08	TraesCS6A01G115400.1	501	778	903	1.68e-130	TraesCS6A01G115400	chr6A	85261630	85262743	Calcium-dependent lipid-binding (CaLB domain) family
		TRINITY_DN27062_c1_g1	5.88164	2.91e-25	5.62e-23	TraesCS1D01G086500.1	1	228	228	3.7e-110	TraesCS1D01G086500	chr1D	70892211	70892770	mitogen-activated protein kinase kinase kinase 3
		TRINITY_DN97155_c0_g1	5.73964	1.43e-07	1.54e-06	TraesCS3D01G524000.1	338	422	714	4.75e-15	TraesCS3D01G524000	chr3D	604303225	604303938	Calcium-binding site, putative
		TRINITY_DN39538_c1_g1	5.57788	3.76e-05	0.00037275	TraesCS6D01G104000.1	705	358	870	0	TraesCS6D01G104000	chr6D	67569268	67570137	Calcium-dependent lipid-binding domain protein
		TRINITY_DN111_c0_g2	5.39176	2.76e-18	2.13e-16	TraesCS4B01G001000.1	1	1005	1044	0	TraesCS4B01G001000	chr4B	639894	640937	Calcium-dependent lipid-binding domain protein
		TRINITY_DN47816_c0_g1	5.3684	2.37e-07	2.4e-06	TraesCS6A01G115400.1	40	317	903	2.78e-143	TraesCS6A01G115400	chr6A	85261630	85262743	Calcium-dependent lipid-binding (CaLB domain) family
		TRINITY_DN43441_c0_g1	5.35751	6.02e-05	0.000349511	TraesCS7A01G183100.1	689	750	1716	1.2e-24	TraesCS7A01G183100	chr7A	138154890	138159887	Sodium/calcium exchanger family protein / calcium-binding EF hand family protein
		TRINITY_DN14736_c0_g2	5.26522	9.36e-23	1.34e-20	TraesCS7B01G035100.1	1	816	816	0	TraesCS7B01G035100	chr7B	34310629	34312241	Calcium-binding EF-hand
		TRINITY_DN71873_c0_g2	5.14879	4.2e-12	1.22e-10	TraesCS6D01G182900.2	1677	1321	12261	0	TraesCS6D01G182900	chr6D	218383154	218453331	calcium-dependent lipid-binding family protein
		TRINITY_DN111_c2_g1	5.06351	1.36e-12	4.37e-11	TraesCS6A01G115400.1	351	589	903	2.42e-123	TraesCS6A01G115400	chr6A	85261630	85262743	Calcium-dependent lipid-binding (CaLB domain) family
		TRINITY_DN47816_c0_g1	5.04199	1.05e-11	4.39e-10	TraesCS6A01G115400.1	40	317	903	2.78e-143	TraesCS6A01G115400	chr6A	85261630	85262743	Calcium-dependent lipid-binding (CaLB domain) family
		TRINITY_DN19907_c0_g1	4.9026	1.04e-24	2.06e-22	TraesCS5B01G152400.1	1	606	606	0	TraesCS5B01G152400	chr5B	281644236	281644841	Calcium-binding protein
		TRINITY_DN69574_c1_g1	4.89171	7.79e-12	3.34e-10	TraesCS6D01G104000.1	1	80	870	6.36e-35	TraesCS6D01G104000	chr6D	67569268	67570137	Calcium-dependent lipid-binding domain protein
		TRINITY_DN111_c0_g2	4.86102	4.59e-18	4.76e-16	TraesCS4B01G001000.1	1	1005	1044	0	TraesCS4B01G001000	chr4B	639894	640937	Calcium-dependent lipid-binding domain protein
		TRINITY_DN146650_c0_g2	4.80128	1.97e-05	0.00020743	TraesCS7D01G507100.1	73	315	609	4.38e-86	TraesCS7D01G507100	chr7D	611467648	611468256	Calcium-binding protein
		TRINITY_DN165150_c0_g1	4.79435	1.35e-06	1.12e-05	TraesCS6B01G224600.2	5537	5625	12414	8.49e-34	TraesCS6B01G224600	chr6B	342982698	343044248	Calcium-dependent lipid-binding family protein isoform protein
		TRINITY_DN69574_c0_g3	4.64715	5.52e-10	1.05e-08	TraesCS6B01G143000.1	244	1	888	5.46e-111	TraesCS6B01G143000	chr6B	142612422	142613492	Calcium-dependent lipid-binding domain protein
		TRINITY_DN130772_c0_g3	4.64199	7.41e-11	2.67e-09	TraesCS2B01G439100.1	218	3	1131	6.18e-104	TraesCS2B01G439100	chr2B	631331027	631337201	Calcium-binding EF-hand family protein
		TRINITY_DN228687_c0_g1	4.54259	0.000153871	0.00132132	TraesCS2D01G534300.1	1	64	312	5.2e-26	TraesCS2D01G534300	chr2D	618136562	618137627	Calcium-binding mitochondrial carrier protein SCaMC-1
		TRINITY_DN45820_c0_g3	4.51493	6.14e-06	7.42e-05	TraesCS7D01G184700.1	1430	1490	1737	1.31e-23	TraesCS7D01G184700	chr7D	138177170	138190198	Sodium/calcium exchanger family protein / calcium-binding EF hand family protein
		TRINITY_DN23817_c0_g1	4.4256	6.1e-08	1.23e-06	TraesCS2A01G191000.1	414	487	1014	4.7e-31	TraesCS2A01G191000	chr2A	157924376	157933890	Calcium-binding protein 39, putative, expressed
		TRINITY_DN97155_c0_g1	4.40386	3.94e-06	4.99e-05	TraesCS3D01G524000.1	338	422	714	4.75e-15	TraesCS3D01G524000	chr3D	604303225	604303938	Calcium-binding site, putative
		TRINITY_DN39538_c1_g1	4.38675	3.32e-06	2.53e-05	TraesCS6D01G104000.1	705	358	870	0	TraesCS6D01G104000	chr6D	67569268	67570137	Calcium-dependent lipid-binding domain protein
		TRINITY_DN48767_c0_g2	4.25518	2.24e-07	3.95e-06	TraesCS2A01G190900.1	1326	1211	1326	3.4e-54	TraesCS2A01G190900	chr2A	157546290	157547615	Calcium-dependent lipid-binding domain-containing protein
		TRINITY_DN70876_c1_g1	4.2187	1.32e-06	1.89e-05	TraesCS2D01G417100.1	1	48	888	4.93e-17	TraesCS2D01G417100	chr2D	531473236	531476093	Calcium-binding EF-hand family protein
		TRINITY_DN14736_c0_g2	4.07384	8.07e-16	6.36e-14	TraesCS7B01G035100.1	1	816	816	0	TraesCS7B01G035100	chr7B	34310629	34312241	Calcium-binding EF-hand
		TRINITY_DN70876_c1_g1	4.05948	5.63e-06	4.04e-05	TraesCS2D01G417100.1	1	48	888	4.93e-17	TraesCS2D01G417100	chr2D	531473236	531476093	Calcium-binding EF-hand family protein
		TRINITY_DN48767_c0_g2	3.9404	1.15e-06	9.73e-06	TraesCS2A01G190900.1	1326	1211	1326	3.4e-54	TraesCS2A01G190900	chr2A	157546290	157547615	Calcium-dependent lipid-binding domain-containing protein
		TRINITY_DN69574_c0_g3	3.90584	1.87e-12	8.91e-11	TraesCS6B01G143000.1	244	1	888	5.46e-111	TraesCS6B01G143000	chr6B	142612422	142613492	Calcium-dependent lipid-binding domain protein
		TRINITY_DN10292_c0_g1	3.74754	3.04e-08	3.89e-07	TraesCS2D01G207400.1	543	1	1632	0	TraesCS2D01G207400	chr2D	161373811	161376896	Calcium-dependent protein kinase
		TRINITY_DN19907_c1_g1	3.73768	0.00185553	0.0076404	TraesCS3B01G553500.1	253	456	456	5.89e-104	TraesCS3B01G553500	chr3B	787990142	787991166	Calcium-binding protein
		TRINITY_DN27062_c1_g1	3.72034	3.81e-06	4.84e-05	TraesCS1D01G086500.1	1	228	228	3.7e-110	TraesCS1D01G086500	chr1D	70892211	70892770	mitogen-activated protein kinase kinase kinase 3
		TRINITY_DN41350_c0_g4	3.57809	0.000431632	0.00210308	TraesCS2B01G383100.1	488	656	1890	7.48e-84	TraesCS2B01G383100	chr2B	546925260	546932664	Calcium-dependent lipid-binding (CaLB domain) family protein
		TRINITY_DN24215_c0_g1	3.49163	7.1e-08	8.24e-07	TraesCS6B01G064600.1	1	146	699	2.32e-71	TraesCS6B01G064600	chr6B	42773718	42778772	Signal peptide peptidase
		TRINITY_DN125951_c0_g1	3.48803	0.0216574	0.0818712	TraesCS2A01G057900.1	459	694	1137	2.5e-48	TraesCS2A01G057900	chr2A	24300484	24301620	Calcium-dependent lipid-binding (CaLB domain) family protein
		TRINITY_DN27838_c0_g1	3.27889	0.0379962	0.124664	TraesCS6D01G182900.1	6322	6395	12657	1.62e-31	TraesCS6D01G182900	chr6D	218383154	218453331	Calcium-dependent lipid-binding family protein isoform protein
		TRINITY_DN5363_c0_g1	3.27867	8.53e-08	9.69e-07	TraesCS7B01G088100.1	565	1167	1719	0	TraesCS7B01G088100	chr7B	103563881	103568854	Sodium/calcium exchanger family protein / calcium-binding EF hand family protein
		TRINITY_DN122730_c0_g1	3.26369	0.000525403	0.00385233	TraesCS7D01G184700.1	1484	1545	1737	3.69e-23	TraesCS7D01G184700	chr7D	138177170	138190198	Sodium/calcium exchanger family protein / calcium-binding EF hand family protein
		TRINITY_DN10292_c0_g1	3.20252	1.62e-07	2.96e-06	TraesCS2D01G207400.1	543	1	1632	0	TraesCS2D01G207400	chr2D	161373811	161376896	Calcium-dependent protein kinase
		TRINITY_DN12924_c0_g1	3.18995	8.28e-09	1.22e-07	TraesCS2D01G173500.1	116	261	261	2.34e-71	TraesCS2D01G173500	chr2D	117199808	117200068	Calcium binding family protein
		TRINITY_DN9220_c0_g2	3.13631	0.00041091	0.00201151	TraesCS5A01G262400.1	327	1	414	1.87e-163	TraesCS5A01G262400	chr5A	475632764	475633379	Calcium-binding EF-hand family protein-like
		TRINITY_DN16233_c0_g3	3.13587	2.83e-08	3.65e-07	TraesCS2D01G173500.1	1	174	261	3.22e-87	TraesCS2D01G173500	chr2D	117199808	117200068	Calcium binding family protein
		TRINITY_DN43267_c0_g2	3.13432	0.000547861	0.0026053	TraesCS3D01G353800.1	1	41	573	4.9e-08	TraesCS3D01G353800	chr3D	464323786	464324719	Calcium-dependent lipid-binding domain-containing protein
		TRINITY_DN7367_c1_g2	3.08176	0.00158851	0.00666875	TraesCS2A01G558400.1	1578	952	2184	0	TraesCS2A01G558400	chr2A	761896325	761898630	C2 calcium/lipid-binding and GRAM domain protein
		TRINITY_DN50970_c0_g1	3.07204	3.18e-05	0.000319836	TraesCS1A01G233200.1	22	81	543	1.46e-23	TraesCS1A01G233200	chr1A	407114639	407116995	Signal peptidase I
		TRINITY_DN84909_c0_g1	3.0274	0.000310102	0.00156048	TraesCS3A01G359700.1	1	400	492	0	TraesCS3A01G359700	chr3A	607486770	607487602	Calcium-dependent lipid-binding domain-containing protein
		TRINITY_DN16273_c0_g1	3.01859	9.95e-09	1.44e-07	TraesCS2D01G417100.1	575	781	888	1.27e-105	TraesCS2D01G417100	chr2D	531473236	531476093	Calcium-binding EF-hand family protein
		TRINITY_DN23817_c0_g1	3.01689	1.38e-05	8.94e-05	TraesCS2A01G191000.1	414	487	1014	4.7e-31	TraesCS2A01G191000	chr2A	157924376	157933890	Calcium-binding protein 39, putative, expressed
		TRINITY_DN41350_c0_g4	2.99929	0.000719028	0.00504476	TraesCS2B01G383100.1	488	656	1890	7.48e-84	TraesCS2B01G383100	chr2B	546925260	546932664	Calcium-dependent lipid-binding (CaLB domain) family protein
		TRINITY_DN80472_c0_g1	2.96066	0.00602217	0.0299467	TraesCS5A01G490200.1	1123	1034	1647	1.35e-35	TraesCS5A01G490200	chr5A	659722683	659726447	Calcium dependent protein kinase
		TRINITY_DN37007_c0_g1	2.95274	0.000679246	0.00316076	TraesCS3D01G039200.1	236	283	507	4.16e-17	TraesCS3D01G039200	chr3D	14843598	14847335	Signal peptidase subunit family protein
		TRINITY_DN130772_c0_g3	2.94201	6.82e-06	4.79e-05	TraesCS2B01G439100.1	218	3	1131	6.18e-104	TraesCS2B01G439100	chr2B	631331027	631337201	Calcium-binding EF-hand family protein
		TRINITY_DN3129_c0_g1	2.90883	1.22e-09	2.15e-08	TraesCS4B01G223400.1	316	1191	1191	0	TraesCS4B01G223400	chr4B	467909192	467912551	Calcium-binding EF-hand family protein
		TRINITY_DN16926_c0_g1	2.90847	0.0026183	0.0103034	TraesCS4B01G001000.1	522	861	1044	1.27e-142	TraesCS4B01G001000	chr4B	639894	640937	Calcium-dependent lipid-binding domain protein
		TRINITY_DN167007_c0_g1	2.88806	0.0406056	0.101253	TraesCS7B01G454000.3	1	465	465	0	TraesCS7B01G454000	chr7B	714729367	714737707	Signal transduction histidine-protein kinase BarA
		TRINITY_DN39964_c0_g1	2.85151	0.000968622	0.00432753	TraesCS2A01G057900.1	886	1137	1137	1.85e-103	TraesCS2A01G057900	chr2A	24300484	24301620	Calcium-dependent lipid-binding (CaLB domain) family protein
		TRINITY_DN42683_c0_g3	2.83365	7.73e-06	9.04e-05	TraesCS1A01G439300.1	269	157	735	8.71e-49	TraesCS1A01G439300	chr1A	588899833	588903358	calcium-dependent lipid-binding family protein
		TRINITY_DN42683_c0_g3	2.80208	1.56e-05	0.000100283	TraesCS1A01G439300.1	269	157	735	8.71e-49	TraesCS1A01G439300	chr1A	588899833	588903358	calcium-dependent lipid-binding family protein
		TRINITY_DN112133_c0_g2	2.79233	0.00314863	0.0175771	TraesCS5B01G117300.1	52	1	663	4.16e-15	TraesCS5B01G117300	chr5B	206757736	206763832	Calcium-dependent lipid-binding domain-containing protein
		TRINITY_DN12821_c0_g1	2.75527	2.11e-06	1.69e-05	TraesCS6B01G351800.1	1	291	291	1.07e-151	TraesCS6B01G351800	chr6B	617128423	617128713	Calcium binding family protein
		TRINITY_DN11654_c0_g3	2.74859	1.9e-05	0.000120346	TraesCS2A01G190900.1	280	1	1326	1.49e-145	TraesCS2A01G190900	chr2A	157546290	157547615	Calcium-dependent lipid-binding domain-containing protein
		TRINITY_DN11654_c0_g3	2.74128	8.01e-06	9.33e-05	TraesCS2A01G190900.1	280	1	1326	1.49e-145	TraesCS2A01G190900	chr2A	157546290	157547615	Calcium-dependent lipid-binding domain-containing protein
		TRINITY_DN62203_c0_g1	2.701	0.000364279	0.00280756	TraesCS7A01G410700.2	162	1	1737	9.22e-80	TraesCS7A01G410700	chr7A	598216896	598222200	Mitogen-activated protein kinase
		TRINITY_DN1102_c0_g1	2.69111	4e-09	6.36e-08	TraesCS3A01G231900.1	1	375	375	8.95e-173	TraesCS3A01G231900	chr3A	433409078	433410427	Tat pathway signal sequence family protein
		TRINITY_DN8261_c0_g1	2.6734	1.07e-06	9.15e-06	TraesCS1A01G238800.1	1	570	570	0	TraesCS1A01G238800	chr1A	425681198	425681767	Calcium binding protein
		TRINITY_DN41049_c0_g1	2.67056	0.00108552	0.0047788	TraesCS2A01G227600.1	406	492	492	3.4e-21	TraesCS2A01G227600	chr2A	240762340	240765145	C2 calcium/lipid-binding plant phosphoribosyltransferase family protein
		TRINITY_DN62218_c0_g1	2.62999	0.00161539	0.00676986	TraesCS4A01G211300.1	170	399	399	2.46e-98	TraesCS4A01G211300	chr4A	504875850	504876248	Small conductance calcium-activated potassium channel protein 2
		TRINITY_DN50970_c0_g1	2.62295	0.00253842	0.0100304	TraesCS1A01G233200.1	22	81	543	1.46e-23	TraesCS1A01G233200	chr1A	407114639	407116995	Signal peptidase I
		TRINITY_DN87211_c0_g1	2.62035	1.95e-05	0.000123185	TraesCS4B01G136200.1	107	456	456	8.42e-160	TraesCS4B01G136200	chr4B	179751148	179751603	Calcium-binding protein
		TRINITY_DN2937_c0_g1	2.59166	1e-05	6.71e-05	TraesCS4A01G272600.1	1	1434	1434	0	TraesCS4A01G272600	chr4A	583906671	583910180	Mitogen-activated protein kinase kinase kinase 1
		TRINITY_DN1102_c0_g1	2.58891	6.96e-12	3.01e-10	TraesCS3A01G231900.1	1	375	375	8.95e-173	TraesCS3A01G231900	chr3A	433409078	433410427	Tat pathway signal sequence family protein
		TRINITY_DN4934_c0_g1	2.52558	5.17e-10	9.88e-09	TraesCS4D01G223700.1	1	310	1194	9.63e-159	TraesCS4D01G223700	chr4D	380455708	380459320	Calcium-binding EF-hand family protein
		TRINITY_DN68145_c0_g1	2.52462	0.000923442	0.00415203	TraesCS6B01G064600.1	252	513	699	9.65e-123	TraesCS6B01G064600	chr6B	42773718	42778772	Signal peptide peptidase
		TRINITY_DN2937_c0_g2	2.51433	2.11e-06	1.69e-05	TraesCS4D01G038800.1	1134	914	1461	2.27e-108	TraesCS4D01G038800	chr4D	16650330	16653998	Mitogen-activated protein kinase kinase kinase 1
		TRINITY_DN34925_c0_g1	2.48872	3.93e-05	0.000235483	TraesCS4B01G223400.1	305	357	1191	1.95e-17	TraesCS4B01G223400	chr4B	467909192	467912551	Calcium-binding EF-hand family protein
		TRINITY_DN14736_c0_g1	2.45371	0.0145871	0.0604208	TraesCS7A01G134000.1	1	120	774	1.66e-55	TraesCS7A01G134000	chr7A	85901499	85903086	Calcium-binding EF-hand
		TRINITY_DN36518_c0_g1	2.45025	0.0001589	0.00136082	TraesCS4B01G262600.1	426	647	1200	4.35e-87	TraesCS4B01G262600	chr4B	532431663	532438151	COP9 signalosome complex subunit 4
		TRINITY_DN102354_c2_g1	2.43006	7.17e-07	6.39e-06	TraesCS4D01G198600.1	937	592	1110	0	TraesCS4D01G198600	chr4D	344940675	344943318	Mitogen-activated protein kinase
		TRINITY_DN22409_c0_g1	2.39623	3.1e-05	0.000313039	TraesCS3A01G231900.1	56	114	375	5.9e-23	TraesCS3A01G231900	chr3A	433409078	433410427	Tat pathway signal sequence family protein
		TRINITY_DN22409_c0_g1	2.36699	1.93e-05	0.000122265	TraesCS3A01G231900.1	56	114	375	5.9e-23	TraesCS3A01G231900	chr3A	433409078	433410427	Tat pathway signal sequence family protein
		TRINITY_DN37007_c0_g1	2.31534	8.73e-05	0.000798749	TraesCS3D01G039200.1	236	283	507	4.16e-17	TraesCS3D01G039200	chr3D	14843598	14847335	Signal peptidase subunit family protein
		TRINITY_DN62218_c0_g1	2.25505	0.047411	0.14628	TraesCS4A01G211300.1	170	399	399	2.46e-98	TraesCS4A01G211300	chr4A	504875850	504876248	Small conductance calcium-activated potassium channel protein 2
		TRINITY_DN7367_c1_g2	2.23244	0.00138267	0.00881202	TraesCS2A01G558400.1	1578	952	2184	0	TraesCS2A01G558400	chr2A	761896325	761898630	C2 calcium/lipid-binding and GRAM domain protein
		TRINITY_DN92619_c0_g1	2.22038	0.00399655	0.021421	TraesCS2B01G216100.1	578	627	1014	1.8e-17	TraesCS2B01G216100	chr2B	201463248	201472863	Calcium-binding protein 39, putative, expressed
		TRINITY_DN2937_c0_g2	2.20066	0.00213271	0.0126837	TraesCS4D01G038800.1	1134	914	1461	2.27e-108	TraesCS4D01G038800	chr4D	16650330	16653998	Mitogen-activated protein kinase kinase kinase 1
		TRINITY_DN3129_c0_g2	2.19469	5.72e-07	9.03e-06	TraesCS2A01G420000.1	1	1131	1131	0	TraesCS2A01G420000	chr2A	676159616	676164225	Calcium-binding EF-hand family protein
		TRINITY_DN57650_c2_g1	2.19179	0.0257562	0.0935406	TraesCS6A01G197400.1	2701	2598	12657	1.19e-45	TraesCS6A01G197400	chr6A	297625430	297717808	Calcium-dependent lipid-binding family protein isoform protein
		TRINITY_DN56488_c0_g1	2.17083	0.000167048	0.000892139	TraesCS5A01G238900.1	1	552	552	0	TraesCS5A01G238900	chr5A	455089178	455089729	Calcium-binding protein
		TRINITY_DN5363_c0_g1	2.16677	4.81e-06	5.95e-05	TraesCS7B01G088100.1	565	1167	1719	0	TraesCS7B01G088100	chr7B	103563881	103568854	Sodium/calcium exchanger family protein / calcium-binding EF hand family protein
		TRINITY_DN1625_c0_g1	2.12836	3.37e-07	3.27e-06	TraesCS7A01G568900.1	286	809	1698	0	TraesCS7A01G568900	chr7A	736434040	736438207	Signal peptide peptidase-like protein
		TRINITY_DN48767_c0_g1	2.12653	8.31e-08	9.47e-07	TraesCS2A01G190900.1	1070	1326	1326	5.7e-133	TraesCS2A01G190900	chr2A	157546290	157547615	Calcium-dependent lipid-binding domain-containing protein
		TRINITY_DN11654_c0_g1	2.10302	4.61e-10	1.44e-08	TraesCS2A01G190900.1	1	1167	1326	0	TraesCS2A01G190900	chr2A	157546290	157547615	Calcium-dependent lipid-binding domain-containing protein
		TRINITY_DN2937_c0_g1	2.09469	7.37e-05	0.000686293	TraesCS4A01G272600.1	1	1434	1434	0	TraesCS4A01G272600	chr4A	583906671	583910180	Mitogen-activated protein kinase kinase kinase 1
		TRINITY_DN7264_c0_g1	2.05856	8.41e-07	7.36e-06	TraesCS7B01G464800.1	1	1155	1155	0	TraesCS7B01G464800	chr7B	721197663	721199592	Lateral signaling target 2-like protein
		TRINITY_DN17280_c1_g1	2.04043	0.00027475	0.00139701	TraesCS6D01G182900.1	8980	8771	12657	1.29e-105	TraesCS6D01G182900	chr6D	218383154	218453331	Calcium-dependent lipid-binding family protein isoform protein
		TRINITY_DN23419_c0_g2	2.03156	0.00155461	0.00654596	TraesCS2A01G432700.1	305	541	3246	1.88e-60	TraesCS2A01G432700	chr2A	685957134	685968395	Calcium-transporting ATPase
		TRINITY_DN4934_c0_g1	2.02749	7.45e-09	1.83e-07	TraesCS4D01G223700.1	1	310	1194	9.63e-159	TraesCS4D01G223700	chr4D	380455708	380459320	Calcium-binding EF-hand family protein
		TRINITY_DN19907_c1_g1	2.0174	0.000384538	0.00294226	TraesCS3B01G553500.1	253	456	456	5.89e-104	TraesCS3B01G553500	chr3B	787990142	787991166	Calcium-binding protein
