# Supplementary material for: Insight into the mechanisms of terminal HS-tolerance in wheat mutant with improved nutritional quality through de novo transcriptome sequencing
Source: Research Square preprint supplement (doi:10.21203/rs.3.rs-241832/v1), 2021-02-26
Supplement: Supplementary file 15 [file d5dabd3f7d1388a69293b34e.xlsx]

## Sheet: Parent-R1
	Table S14 List of Simple Sequence Repeats (SSRs) identified in assembled transcript sequences of wheat parent
	ID	SSR nr.	SSR type	SSR	size	start	end
	TRINITY_DN69561_c0_g1_i2	1	p1	(T)10	10	479	488
	TRINITY_DN69501_c0_g1_i1	1	p1	(A)14	14	265	278
	TRINITY_DN69503_c0_g1_i1	1	p4	(TATT)5	20	52	71
	TRINITY_DN69550_c0_g1_i2	1	p4	(CATC)5	20	265	284
	TRINITY_DN69522_c0_g1_i4	1	p3	(CCG)6	18	158	175
	TRINITY_DN69522_c0_g1_i3	1	p3	(CCG)6	18	158	175
	TRINITY_DN69522_c0_g1_i6	1	p1	(A)11	11	34	44
	TRINITY_DN69522_c0_g1_i6	2	p3	(CCG)6	18	232	249
	TRINITY_DN69522_c0_g1_i1	1	p3	(CCG)6	18	158	175
	TRINITY_DN69522_c0_g1_i2	1	p3	(CCG)6	18	232	249
	TRINITY_DN69595_c1_g1_i1	1	p3	(CCG)5	15	102	116
	TRINITY_DN69527_c0_g2_i2	1	p3	(GGC)5	15	108	122
	TRINITY_DN69527_c0_g2_i1	1	p3	(GGC)5	15	97	111
	TRINITY_DN69575_c0_g1_i3	1	p2	(GT)7	14	98	111
	TRINITY_DN69575_c0_g1_i3	2	p3	(GCG)5	15	232	246
	TRINITY_DN28078_c0_g1_i8	1	p4	(GATT)5	20	84	103
	TRINITY_DN28078_c0_g1_i2	1	p4	(GATT)5	20	89	108
	TRINITY_DN28078_c0_g1_i5	1	p4	(GATT)5	20	89	108
	TRINITY_DN28078_c0_g1_i4	1	p4	(GATT)5	20	89	108
	TRINITY_DN28006_c0_g1_i1	1	p1	(A)10	10	8	17
	TRINITY_DN28030_c0_g1_i1	1	c	(TCC)5(CT)19gcatggatgcgtaatggcacat(GCA)5	90	51	140
	TRINITY_DN28030_c0_g1_i6	1	c	(TCC)5(CT)19	53	51	103
	TRINITY_DN28030_c0_g1_i5	1	c	(TCC)5(CT)19	53	51	103
	TRINITY_DN28030_c0_g1_i4	1	c	(TCC)5(CT)19gcatggatgcgtaatggcacat(GCA)5	90	51	140
	TRINITY_DN28030_c0_g1_i2	1	c	(TCC)5(CT)19gcgtgatgcgtaatggcacat(GCA)6	92	51	142
	TRINITY_DN28030_c0_g1_i3	1	p2	(CT)17	34	70	103
	TRINITY_DN28092_c0_g1_i2	1	p3	(TTC)6	18	238	255
	TRINITY_DN28092_c0_g2_i2	1	p3	(TTC)11	33	584	616
	TRINITY_DN28068_c0_g1_i7	1	p2	(CG)6	12	309	320
	TRINITY_DN28068_c0_g1_i11	1	p2	(CG)6	12	309	320
	TRINITY_DN28039_c0_g1_i2	1	c	(CG)7tgccgtataaagtctcccacagctcacacgggcagccgcctgcctagctagccgctggtagaggaggagaagccgt(AG)8ttcagagaggagatagagagttcagagaggagat(AG)6ttcagagag(GA)6gttcagagaggagacagagg(GA)7	207	221	427
	TRINITY_DN28039_c0_g1_i3	1	c	(AG)8ttcagagaggagatagagagttcagagaggagat(AG)6ttcagagag(GA)6gttcagagaggagacagagg(GA)7	117	226	342
	TRINITY_DN28039_c0_g1_i1	1	p2	(CG)6	12	218	229
	TRINITY_DN28039_c0_g1_i1	2	c	(AG)12ggagagagttcagagag(GA)6	53	331	383
	TRINITY_DN28039_c2_g1_i1	1	p2	(CA)12	24	40	63
	TRINITY_DN28002_c0_g1_i1	1	p1	(T)10	10	43	52
	TRINITY_DN28044_c3_g1_i1	1	p2	(CA)7	14	48	61
	TRINITY_DN28059_c0_g1_i1	1	p2	(CT)7	14	54	67
	TRINITY_DN28083_c0_g1_i1	1	p3	(GCA)5	15	287	301
	TRINITY_DN28083_c0_g1_i2	1	p3	(GCA)5	15	287	301
	TRINITY_DN28071_c0_g1_i6	1	p2	(CT)8	16	8	23
	TRINITY_DN28071_c0_g1_i1	1	p2	(CT)8	16	8	23
	TRINITY_DN28071_c0_g1_i8	1	p2	(CT)8	16	53	68
	TRINITY_DN28036_c0_g1_i8	1	p1	(T)10	10	1607	1616
	TRINITY_DN28036_c0_g1_i1	1	p1	(T)10	10	1149	1158
	TRINITY_DN28036_c0_g1_i2	1	p1	(T)10	10	771	780
	TRINITY_DN28011_c1_g1_i1	1	p4	(AAGG)6	24	114	137
	TRINITY_DN28050_c0_g2_i2	1	p2	(TC)6	12	646	657
	TRINITY_DN28050_c0_g2_i1	1	p2	(TC)6	12	320	331
	TRINITY_DN28098_c1_g1_i1	1	p3	(GCC)5	15	122	136
	TRINITY_DN28069_c0_g1_i7	1	p2	(GT)6	12	165	176
	TRINITY_DN28069_c0_g1_i6	1	p2	(GT)8	16	165	180
	TRINITY_DN91516_c0_g1_i1	1	p2	(TG)7	14	102	115
	TRINITY_DN91536_c0_g1_i4	1	p3	(TTG)6	18	439	456
	TRINITY_DN91536_c0_g1_i1	1	p4	(TACA)6	24	33	56
	TRINITY_DN91536_c0_g1_i3	1	p4	(TACA)6	24	33	56
	TRINITY_DN91536_c0_g1_i2	1	p4	(TACA)6	24	33	56
	TRINITY_DN91536_c1_g1_i1	1	p4	(TGTA)6	24	359	382
	TRINITY_DN91525_c0_g1_i1	1	p3	(AAG)5	15	595	609
	TRINITY_DN91521_c0_g1_i1	1	p2	(AC)10	20	144	163
	TRINITY_DN30140_c0_g3_i1	1	p3	(CTC)5	15	101	115
	TRINITY_DN30190_c0_g1_i1	1	c	(CGA)5catcaacacgaccttgtggaagctccgatgccgatgacgtagacgcgtggcatatat(TG)9	90	137	226
	TRINITY_DN30101_c0_g1_i1	1	p3	(GGA)5	15	516	530
	TRINITY_DN30101_c0_g1_i2	1	p3	(CAC)6	18	96	113
	TRINITY_DN30101_c0_g1_i2	2	p3	(GGA)5	15	516	530
	TRINITY_DN30101_c0_g2_i6	1	p3	(CCA)5	15	1484	1498
	TRINITY_DN30101_c0_g2_i6	2	p3	(TTC)6	18	1670	1687
	TRINITY_DN30101_c0_g2_i4	1	p2	(CT)6	12	350	361
	TRINITY_DN30101_c0_g2_i4	2	p3	(CCA)5	15	1484	1498
	TRINITY_DN30101_c0_g2_i4	3	p3	(TTC)6	18	1678	1695
	TRINITY_DN30121_c0_g1_i3	1	p2	(GA)9	18	50	67
	TRINITY_DN30121_c0_g1_i7	1	p2	(GA)9	18	50	67
	TRINITY_DN30197_c0_g1_i1	1	p3	(GCT)5	15	108	122
	TRINITY_DN30197_c0_g1_i3	1	p3	(GCT)5	15	108	122
	TRINITY_DN30155_c0_g1_i1	1	p2	(CA)11	22	139	160
	TRINITY_DN30155_c0_g1_i3	1	p2	(CA)6	12	154	165
	TRINITY_DN30125_c0_g1_i2	1	p3	(TGC)5	15	1322	1336
	TRINITY_DN30161_c0_g1_i1	1	p2	(CT)8	16	196	211
	TRINITY_DN30161_c0_g1_i1	2	p3	(TCT)5	15	401	415
	TRINITY_DN144_c0_g1_i10	1	p4	(CATC)5	20	194	213
	TRINITY_DN144_c0_g1_i7	1	p4	(CATC)5	20	194	213
	TRINITY_DN144_c0_g1_i8	1	p4	(CATC)5	20	194	213
	TRINITY_DN144_c0_g1_i6	1	p4	(CATC)5	20	194	213
	TRINITY_DN144_c0_g1_i2	1	p4	(CATC)5	20	194	213
	TRINITY_DN144_c0_g1_i3	1	p4	(CATC)5	20	194	213
	TRINITY_DN144_c0_g1_i4	1	p4	(CATC)5	20	194	213
	TRINITY_DN144_c0_g1_i11	1	p4	(CATC)5	20	194	213
	TRINITY_DN144_c0_g1_i13	1	p4	(CATC)5	20	194	213
	TRINITY_DN179_c1_g1_i2	1	p3	(TGA)5	15	442	456
	TRINITY_DN153_c0_g1_i9	1	p1	(A)10	10	2921	2930
	TRINITY_DN194_c0_g2_i1	1	p2	(GA)6	12	285	296
	TRINITY_DN151_c0_g1_i1	1	p1	(A)11	11	1382	1392
	TRINITY_DN193_c0_g1_i7	1	p1	(A)10	10	35	44
	TRINITY_DN193_c0_g1_i7	2	p2	(CG)6	12	197	208
	TRINITY_DN193_c0_g1_i6	1	p2	(CG)6	12	197	208
	TRINITY_DN193_c0_g1_i9	1	p1	(A)10	10	35	44
	TRINITY_DN193_c0_g1_i9	2	p2	(CG)6	12	197	208
	TRINITY_DN193_c0_g1_i4	1	p1	(A)10	10	38	47
	TRINITY_DN193_c0_g1_i5	1	p1	(A)10	10	38	47
	TRINITY_DN122_c0_g1_i2	1	p3	(CTC)5	15	1026	1040
	TRINITY_DN122_c0_g1_i8	1	p3	(CTC)5	15	997	1011
	TRINITY_DN122_c0_g1_i9	1	p3	(CTC)5	15	997	1011
	TRINITY_DN122_c0_g1_i4	1	p3	(CTC)5	15	1035	1049
	TRINITY_DN122_c0_g1_i5	1	p3	(CTC)5	15	1026	1040
	TRINITY_DN139_c0_g1_i3	1	p4	(TGTA)5	20	1941	1960
	TRINITY_DN138_c0_g1_i3	1	p4	(AGGA)6	24	33	56
	TRINITY_DN198_c0_g1_i7	1	p1	(T)11	11	2355	2365
	TRINITY_DN100_c0_g1_i3	1	p1	(T)10	10	5984	5993
	TRINITY_DN100_c0_g2_i1	1	p3	(TCC)5	15	245	259
	TRINITY_DN125_c0_g1_i10	1	p1	(T)10	10	1044	1053
	TRINITY_DN132_c0_g2_i4	1	p1	(T)10	10	1224	1233
	TRINITY_DN164_c2_g1_i2	1	p3	(GAA)8	24	249	272
	TRINITY_DN164_c2_g2_i2	1	p3	(GAA)7	21	38	58
	TRINITY_DN164_c2_g2_i3	1	p3	(GAA)7	21	38	58
	TRINITY_DN164_c2_g2_i1	1	p3	(AAG)5	15	132	146
	TRINITY_DN189_c0_g2_i4	1	p1	(T)11	11	2360	2370
	TRINITY_DN121_c0_g3_i1	1	p3	(TTG)5	15	846	860
	TRINITY_DN121_c1_g1_i1	1	p3	(TTG)5	15	126	140
	TRINITY_DN176_c1_g1_i1	1	p2	(CT)7	14	268	281
	TRINITY_DN176_c1_g1_i5	1	p2	(CT)6	12	274	285
	TRINITY_DN176_c1_g1_i3	1	p2	(CT)14	28	274	301
	TRINITY_DN176_c1_g1_i4	1	p2	(CT)14	28	274	301
	TRINITY_DN176_c1_g1_i2	1	p2	(CT)14	28	268	295
	TRINITY_DN176_c4_g1_i1	1	p2	(CT)7	14	343	356
	TRINITY_DN187_c0_g1_i2	1	p2	(CA)8	16	25	40
	TRINITY_DN187_c1_g1_i6	1	p3	(ACG)5	15	322	336
	TRINITY_DN187_c1_g1_i2	1	p3	(ACG)5	15	322	336
	TRINITY_DN187_c1_g1_i7	1	p3	(ACG)5	15	322	336
	TRINITY_DN187_c1_g1_i9	1	p3	(ACG)5	15	336	350
	TRINITY_DN187_c1_g1_i5	1	p3	(ACG)5	15	336	350
	TRINITY_DN187_c1_g1_i10	1	p3	(ACG)5	15	336	350
	TRINITY_DN187_c1_g1_i4	1	p3	(ACG)5	15	336	350
	TRINITY_DN187_c1_g1_i8	1	p3	(ACG)5	15	322	336
	TRINITY_DN115_c0_g1_i4	1	p1	(T)11	11	32	42
	TRINITY_DN115_c0_g1_i5	1	p1	(T)11	11	32	42
	TRINITY_DN115_c0_g1_i8	1	p1	(T)11	11	32	42
	TRINITY_DN115_c0_g1_i8	2	c	(TG)9tcggtc(T)10	34	465	498
	TRINITY_DN115_c0_g1_i2	1	p1	(T)11	11	32	42
	TRINITY_DN115_c0_g1_i6	1	p1	(T)11	11	32	42
	TRINITY_DN115_c0_g1_i9	1	p1	(T)11	11	32	42
	TRINITY_DN119_c0_g1_i19	1	p2	(TC)6	12	88	99
	TRINITY_DN119_c0_g1_i2	1	p2	(TC)6	12	88	99
	TRINITY_DN119_c0_g1_i14	1	p2	(TC)6	12	88	99
	TRINITY_DN119_c0_g1_i4	1	p2	(TC)11	22	53	74
	TRINITY_DN119_c0_g1_i22	1	p2	(TC)6	12	88	99
	TRINITY_DN133_c0_g1_i3	1	c	(CCA)5(CAA)5	30	45	74
	TRINITY_DN133_c0_g1_i3	2	p2	(TG)12	24	550	573
	TRINITY_DN133_c0_g1_i1	1	c	(CCA)5(CAA)5	30	45	74
	TRINITY_DN133_c0_g1_i2	1	c	(CCA)5(CAA)5	30	45	74
	TRINITY_DN133_c1_g1_i2	1	p2	(TG)23	46	942	987
	TRINITY_DN133_c1_g1_i4	1	p2	(TG)6	12	942	953
	TRINITY_DN133_c1_g1_i1	1	p2	(TG)6	12	938	949
	TRINITY_DN133_c1_g1_i3	1	p2	(TG)23	46	942	987
	TRINITY_DN104_c0_g1_i5	1	p3	(TGC)5	15	1110	1124
	TRINITY_DN104_c0_g1_i3	1	p3	(GAC)6	18	1425	1442
	TRINITY_DN131_c0_g1_i4	1	p3	(CGG)6	18	71	88
	TRINITY_DN131_c0_g1_i1	1	p3	(CGG)6	18	71	88
	TRINITY_DN131_c0_g1_i2	1	p3	(CGG)6	18	71	88
	TRINITY_DN131_c0_g1_i5	1	p3	(CGG)6	18	71	88
	TRINITY_DN131_c0_g1_i3	1	p3	(CGG)6	18	71	88
	TRINITY_DN114_c0_g1_i3	1	c	(A)10ctgtgtgtg(T)10	29	1322	1350
	TRINITY_DN150_c0_g1_i4	1	p2	(TG)7	14	1783	1796
	TRINITY_DN150_c0_g1_i1	1	p2	(TG)7	14	1783	1796
	TRINITY_DN169_c0_g1_i6	1	p3	(TGG)5	15	446	460
	TRINITY_DN169_c0_g1_i1	1	p3	(TGG)5	15	446	460
	TRINITY_DN126_c0_g2_i2	1	p1	(A)19	19	16	34
	TRINITY_DN145_c0_g1_i1	1	p3	(TAC)6	18	1673	1690
	TRINITY_DN163_c0_g3_i3	1	p3	(GCG)5	15	287	301
	TRINITY_DN112_c0_g2_i1	1	p2	(TC)6	12	317	328
	TRINITY_DN175_c0_g1_i2	1	p3	(CGG)5	15	158	172
	TRINITY_DN175_c0_g1_i5	1	p3	(CGG)5	15	158	172
	TRINITY_DN175_c0_g1_i7	1	p3	(CGG)5	15	158	172
	TRINITY_DN181_c0_g1_i7	1	p2	(GT)6	12	1261	1272
	TRINITY_DN181_c0_g1_i1	1	p2	(GT)6	12	1336	1347
	TRINITY_DN107_c0_g1_i10	1	p1	(T)11	11	1101	1111
	TRINITY_DN107_c0_g1_i6	1	p1	(T)11	11	1101	1111
	TRINITY_DN107_c0_g1_i11	1	p1	(A)12	12	1005	1016
	TRINITY_DN107_c0_g1_i18	1	p1	(T)11	11	1101	1111
	TRINITY_DN188_c1_g1_i3	1	p3	(GCT)5	15	340	354
	TRINITY_DN188_c1_g1_i3	2	p2	(TC)6	12	510	521
	TRINITY_DN188_c1_g1_i6	1	p3	(GCT)5	15	340	354
	TRINITY_DN188_c1_g1_i6	2	p2	(TC)6	12	510	521
	TRINITY_DN188_c1_g1_i4	1	p2	(TC)6	12	198	209
	TRINITY_DN188_c1_g1_i10	1	p2	(TC)6	12	198	209
	TRINITY_DN188_c4_g1_i4	1	p2	(TC)17	34	48	81
	TRINITY_DN188_c4_g1_i1	1	p2	(TC)23	46	284	329
	TRINITY_DN188_c5_g1_i5	1	c	(C)12(TC)7	26	186	211
	TRINITY_DN108_c1_g2_i2	1	p3	(CAG)5	15	49	63
	TRINITY_DN108_c1_g2_i1	1	p3	(CAG)5	15	49	63
	TRINITY_DN118_c1_g1_i2	1	p3	(GAA)5	15	1074	1088
	TRINITY_DN118_c1_g1_i1	1	p3	(AGA)7	21	1070	1090
	TRINITY_DN155_c0_g1_i10	1	p1	(T)10	10	3615	3624
	TRINITY_DN155_c0_g1_i1	1	p1	(T)10	10	3618	3627
	TRINITY_DN155_c0_g1_i11	1	p3	(CAG)5	15	25	39
	TRINITY_DN142_c0_g1_i5	1	p1	(T)10	10	1986	1995
	TRINITY_DN142_c0_g1_i8	1	p3	(CCT)6	18	835	852
	TRINITY_DN142_c0_g1_i8	2	p1	(T)10	10	1994	2003
	TRINITY_DN142_c0_g1_i9	1	p1	(T)10	10	1994	2003
	TRINITY_DN142_c0_g1_i6	1	p3	(CCT)6	18	836	853
	TRINITY_DN142_c0_g1_i6	2	p1	(T)10	10	1995	2004
	TRINITY_DN142_c0_g1_i10	1	p1	(T)10	10	2004	2013
	TRINITY_DN171_c0_g1_i3	1	p1	(T)10	10	1103	1112
	TRINITY_DN171_c0_g1_i7	1	p1	(T)10	10	1085	1094
	TRINITY_DN171_c0_g1_i10	1	p3	(CTC)5	15	133	147
	TRINITY_DN171_c0_g1_i4	1	p1	(T)10	10	1109	1118
	TRINITY_DN171_c0_g1_i6	1	p3	(CTC)5	15	133	147
	TRINITY_DN171_c0_g1_i6	2	p1	(T)10	10	1088	1097
	TRINITY_DN161_c0_g2_i3	1	p3	(CCG)5	15	220	234
	TRINITY_DN161_c0_g2_i3	2	p3	(CCA)6	18	2081	2098
	TRINITY_DN161_c0_g2_i2	1	p3	(CCG)5	15	220	234
	TRINITY_DN161_c0_g2_i2	2	p3	(CCA)6	18	2081	2098
	TRINITY_DN161_c0_g2_i1	1	p3	(CCG)5	15	220	234
	TRINITY_DN161_c0_g2_i1	2	p3	(CCA)6	18	2081	2098
	TRINITY_DN161_c0_g3_i1	1	p3	(GGC)5	15	423	437
	TRINITY_DN101_c0_g1_i1	1	p2	(GT)7	14	903	916
	TRINITY_DN123_c0_g1_i2	1	p3	(AGG)5	15	104	118
	TRINITY_DN123_c0_g1_i1	1	p3	(AGG)5	15	104	118
	TRINITY_DN123_c0_g2_i1	1	p3	(AGG)5	15	284	298
	TRINITY_DN123_c0_g2_i2	1	p3	(AGG)5	15	284	298
	TRINITY_DN110_c0_g1_i4	1	p3	(CGA)6	18	39	56
	TRINITY_DN110_c0_g1_i2	1	p3	(GAC)5	15	449	463
	TRINITY_DN110_c0_g1_i3	1	p3	(CGA)6	18	39	56
	TRINITY_DN110_c0_g1_i1	1	p3	(GAC)5	15	449	463
	TRINITY_DN113_c0_g2_i2	1	p3	(GCC)7	21	30	50
	TRINITY_DN111_c2_g1_i1	1	p3	(CAG)5	15	179	193
	TRINITY_DN103_c0_g1_i5	1	p3	(AAG)5	15	831	845
	TRINITY_DN103_c0_g1_i4	1	p3	(AAG)5	15	831	845
	TRINITY_DN103_c0_g1_i3	1	p3	(AAG)5	15	831	845
	TRINITY_DN103_c0_g1_i6	1	p3	(AAG)5	15	590	604
	TRINITY_DN103_c0_g1_i2	1	p3	(AAG)5	15	831	845
	TRINITY_DN103_c0_g1_i1	1	p3	(AAG)5	15	590	604
	TRINITY_DN103_c0_g2_i2	1	p3	(AGG)5	15	339	353
	TRINITY_DN103_c0_g2_i1	1	p3	(AGG)5	15	339	353
	TRINITY_DN88680_c0_g1_i2	1	p3	(TTG)6	18	274	291
	TRINITY_DN88680_c2_g1_i1	1	p3	(TTG)6	18	342	359
	TRINITY_DN88600_c0_g1_i3	1	p2	(TC)7	14	38	51
	TRINITY_DN88622_c0_g1_i2	1	p1	(T)10	10	233	242
	TRINITY_DN88647_c0_g1_i1	1	p2	(AC)6	12	116	127
	TRINITY_DN88656_c0_g1_i1	1	p3	(CCA)6	18	556	573
	TRINITY_DN88609_c0_g4_i1	1	p3	(CGG)6	18	148	165
	TRINITY_DN88638_c0_g1_i1	1	p1	(T)10	10	366	375
	TRINITY_DN57035_c0_g1_i3	1	p3	(GCC)5	15	585	599
	TRINITY_DN57032_c0_g1_i2	1	p1	(A)10	10	289	298
	TRINITY_DN57046_c0_g1_i2	1	p1	(A)10	10	279	288
	TRINITY_DN57020_c0_g1_i1	1	p2	(TC)10	20	1058	1077
	TRINITY_DN57045_c1_g1_i5	1	p3	(CCG)5	15	214	228
	TRINITY_DN57001_c0_g1_i1	1	p2	(CA)6	12	166	177
	TRINITY_DN57001_c0_g2_i4	1	c	(TAG)5tggcccagggaggcccaggcccagtactgttcatgtaaccctaatgttgtgctatata(TG)6	85	309	393
	TRINITY_DN57001_c0_g2_i4	2	p3	(TGC)5	15	859	873
	TRINITY_DN57001_c0_g2_i2	1	c	(TAG)5tggcccagggaggcccaggcccagtactgttcatgtaaccctaatgttgtgctatata(TG)6	85	309	393
	TRINITY_DN57001_c0_g2_i3	1	c	(TAG)5tggcccagggaggcccaggcccagtactgttcatgtaaccctaatgttgtgctatata(TG)6	85	309	393
	TRINITY_DN57001_c0_g3_i2	1	p3	(CAG)5	15	852	866
	TRINITY_DN57001_c0_g3_i2	2	p1	(T)10	10	1085	1094
	TRINITY_DN57066_c0_g1_i5	1	p1	(T)10	10	787	796
	TRINITY_DN57098_c0_g1_i3	1	p3	(TTG)8	24	560	583
	TRINITY_DN59536_c0_g2_i2	1	p2	(GT)6	12	206	217
	TRINITY_DN59536_c0_g2_i1	1	p2	(GT)6	12	209	220
	TRINITY_DN59513_c0_g3_i1	1	p2	(GT)7	14	194	207
	TRINITY_DN59549_c0_g1_i1	1	p1	(T)10	10	443	452
	TRINITY_DN59519_c0_g1_i3	1	p3	(TCC)7	21	41	61
	TRINITY_DN59532_c1_g1_i1	1	p1	(A)10	10	154	163
	TRINITY_DN59564_c0_g1_i5	1	p1	(A)10	10	217	226
	TRINITY_DN59564_c0_g2_i2	1	p1	(A)10	10	1638	1647
	TRINITY_DN59548_c0_g1_i4	1	p1	(T)10	10	824	833
	TRINITY_DN59596_c0_g1_i1	1	p2	(GA)6	12	655	666
	TRINITY_DN59596_c0_g1_i3	1	p2	(GA)6	12	496	507
	TRINITY_DN59516_c0_g1_i1	1	p3	(GTC)5	15	179	193
	TRINITY_DN59545_c0_g1_i2	1	p3	(GCC)7	21	131	151
	TRINITY_DN18702_c0_g1_i6	1	p3	(AGC)5	15	422	436
	TRINITY_DN18702_c0_g1_i5	1	p3	(AGC)5	15	422	436
	TRINITY_DN18702_c0_g1_i3	1	p3	(AGC)5	15	422	436
	TRINITY_DN18736_c0_g3_i1	1	p2	(AG)9	18	97	114
	TRINITY_DN18775_c0_g1_i2	1	p5	(GCTTG)5	25	185	209
	TRINITY_DN18775_c0_g1_i9	1	p5	(GCTTG)5	25	185	209
	TRINITY_DN18775_c0_g1_i4	1	p5	(GCTTG)5	25	185	209
	TRINITY_DN18775_c1_g1_i1	1	p3	(GAG)6	18	294	311
	TRINITY_DN18742_c0_g1_i1	1	p2	(CA)8	16	827	842
	TRINITY_DN18778_c0_g1_i3	1	p1	(A)10	10	588	597
	TRINITY_DN18778_c0_g1_i1	1	p1	(A)10	10	591	600
	TRINITY_DN18737_c0_g1_i3	1	p3	(AGG)5	15	69	83
	TRINITY_DN18737_c0_g1_i2	1	p3	(CGC)6	18	351	368
	TRINITY_DN18737_c0_g1_i7	1	p3	(AGG)5	15	69	83
	TRINITY_DN18730_c0_g1_i6	1	p3	(TCC)6	18	33	50
	TRINITY_DN18730_c0_g1_i2	1	p2	(GA)16	32	745	776
	TRINITY_DN18730_c0_g1_i7	1	p3	(TCC)6	18	33	50
	TRINITY_DN18730_c0_g1_i7	2	p2	(GA)16	32	1163	1194
	TRINITY_DN18730_c0_g1_i8	1	p2	(GA)16	32	1395	1426
	TRINITY_DN18730_c0_g1_i1	1	p3	(TCC)6	18	33	50
	TRINITY_DN18730_c0_g1_i3	1	p3	(TCC)6	18	33	50
	TRINITY_DN18730_c0_g1_i9	1	p2	(GA)16	32	1476	1507
	TRINITY_DN18773_c0_g1_i7	1	p3	(CTT)5	15	177	191
	TRINITY_DN18773_c0_g1_i4	1	p3	(CTT)5	15	149	163
	TRINITY_DN18777_c0_g1_i1	1	p1	(T)10	10	471	480
	TRINITY_DN18777_c0_g1_i2	1	p1	(T)10	10	472	481
	TRINITY_DN18741_c0_g1_i1	1	p3	(TCT)5	15	681	695
	TRINITY_DN18741_c0_g1_i15	1	c	(TTC)6tgagtattcctctaggtagctctagatcaagctctggtagctgcaatggag(CTT)6	87	724	810
	TRINITY_DN18741_c0_g1_i5	1	c	(TTC)6tgagtattcctctaggtagctctagatcaagctctggtagctgcaatggag(CTT)6	87	786	872
	TRINITY_DN18729_c0_g1_i5	1	p3	(CTC)5	15	148	162
	TRINITY_DN18792_c0_g1_i3	1	p2	(CT)6	12	809	820
	TRINITY_DN18706_c0_g1_i6	1	p2	(CG)6	12	305	316
	TRINITY_DN18706_c0_g1_i4	1	p2	(CG)6	12	305	316
	TRINITY_DN18745_c0_g3_i2	1	p1	(A)14	14	68	81
	TRINITY_DN18703_c0_g1_i10	1	p2	(CT)7	14	369	382
	TRINITY_DN18770_c0_g2_i7	1	p2	(TG)6	12	2958	2969
	TRINITY_DN18711_c0_g1_i10	1	p2	(CT)6	12	537	548
	TRINITY_DN18711_c0_g1_i10	2	p3	(GGC)5	15	669	683
	TRINITY_DN18711_c0_g1_i8	1	p2	(CT)6	12	537	548
	TRINITY_DN18711_c0_g1_i8	2	p3	(GGC)5	15	669	683
	TRINITY_DN18711_c0_g1_i14	1	p2	(CT)6	12	537	548
	TRINITY_DN18711_c0_g1_i14	2	p3	(GGC)5	15	669	683
	TRINITY_DN18711_c0_g1_i4	1	p2	(CT)6	12	537	548
	TRINITY_DN18711_c0_g1_i4	2	p3	(GGC)5	15	669	683
	TRINITY_DN18711_c0_g1_i11	1	p2	(CT)6	12	537	548
	TRINITY_DN18711_c0_g1_i11	2	p3	(GGC)5	15	669	683
	TRINITY_DN18711_c0_g1_i23	1	p2	(CT)6	12	537	548
	TRINITY_DN18711_c0_g1_i23	2	p3	(GGC)5	15	669	683
	TRINITY_DN18766_c1_g1_i1	1	p2	(CT)7	14	31	44
	TRINITY_DN18766_c1_g1_i7	1	p3	(ATT)7	21	130	150
	TRINITY_DN18766_c1_g1_i8	1	p2	(CT)7	14	31	44
	TRINITY_DN18782_c0_g1_i1	1	p2	(AG)6	12	235	246
	TRINITY_DN18769_c0_g1_i7	1	p1	(A)10	10	1113	1122
	TRINITY_DN18726_c0_g1_i4	1	c	(TC)6ccgctctgctggtcggcgagaggcagcctgccatgtgggcctcgccggggaggctgccggcgat(GGA)5	91	179	269
	TRINITY_DN18726_c0_g1_i7	1	c	(TC)6ccgctctgctggtcggcgagaggcagcctgccatgtgggcctcgccggggaggctgccggcgat(GGA)5	91	179	269
	TRINITY_DN18726_c0_g1_i2	1	p3	(GGA)5	15	262	276
	TRINITY_DN18726_c0_g1_i6	1	p3	(GGA)5	15	262	276
	TRINITY_DN18726_c0_g1_i1	1	p3	(GGA)5	15	262	276
	TRINITY_DN22802_c0_g3_i1	1	p3	(AGC)5	15	199	213
	TRINITY_DN22802_c0_g3_i3	1	p3	(AGC)5	15	199	213
	TRINITY_DN22802_c4_g1_i3	1	p2	(TC)6	12	228	239
	TRINITY_DN22802_c4_g1_i1	1	p2	(TC)6	12	228	239
	TRINITY_DN22818_c0_g1_i6	1	p3	(GAC)5	15	579	593
	TRINITY_DN22818_c0_g1_i2	1	p3	(GAG)5	15	420	434
	TRINITY_DN22818_c0_g1_i1	1	p3	(GAC)5	15	440	454
	TRINITY_DN22800_c2_g1_i1	1	p2	(AC)6	12	103	114
	TRINITY_DN22895_c0_g1_i1	1	p2	(TC)7	14	251	264
	TRINITY_DN22850_c0_g3_i1	1	p1	(A)10	10	275	284
	TRINITY_DN22804_c0_g1_i1	1	p3	(CGG)5	15	359	373
	TRINITY_DN22804_c0_g1_i1	2	p3	(AGC)7	21	514	534
	TRINITY_DN22804_c0_g1_i4	1	p3	(AGC)7	21	514	534
	TRINITY_DN22804_c0_g1_i5	1	p3	(AGC)7	21	517	537
	TRINITY_DN22876_c0_g1_i1	1	p1	(T)11	11	776	786
	TRINITY_DN22864_c0_g1_i4	1	p2	(CT)7	14	475	488
	TRINITY_DN22864_c0_g1_i2	1	p2	(CT)7	14	251	264
	TRINITY_DN22864_c0_g1_i7	1	p2	(CT)7	14	1318	1331
	TRINITY_DN22820_c0_g1_i4	1	p3	(CCT)7	21	63	83
	TRINITY_DN22820_c0_g1_i1	1	p3	(CCT)7	21	63	83
	TRINITY_DN22829_c0_g3_i2	1	p3	(GGC)5	15	209	223
	TRINITY_DN22829_c0_g3_i1	1	p3	(GGC)5	15	212	226
	TRINITY_DN22807_c1_g1_i8	1	p4	(TATC)6	24	48	71
	TRINITY_DN22825_c0_g1_i2	1	p2	(GC)7	14	283	296
	TRINITY_DN22819_c1_g1_i2	1	p1	(T)10	10	104	113
	TRINITY_DN22867_c0_g1_i2	1	p1	(A)10	10	2709	2718
	TRINITY_DN22845_c1_g1_i5	1	p1	(T)10	10	2881	2890
	TRINITY_DN22845_c1_g1_i8	1	p1	(T)10	10	2881	2890
	TRINITY_DN22835_c0_g1_i7	1	p1	(T)11	11	1680	1690
	TRINITY_DN22835_c0_g1_i4	1	p1	(T)11	11	1680	1690
	TRINITY_DN22835_c0_g1_i8	1	p1	(T)11	11	1680	1690
	TRINITY_DN22835_c0_g1_i5	1	p1	(T)11	11	1680	1690
	TRINITY_DN22835_c0_g1_i3	1	p1	(T)11	11	1680	1690
	TRINITY_DN22835_c0_g1_i2	1	p1	(T)11	11	1680	1690
	TRINITY_DN22838_c1_g1_i1	1	p3	(TCC)5	15	42	56
	TRINITY_DN60428_c0_g1_i7	1	p3	(TCT)5	15	287	301
	TRINITY_DN60456_c0_g1_i3	1	p2	(TC)10	20	323	342
	TRINITY_DN60456_c1_g1_i6	1	p2	(TG)9	18	340	357
	TRINITY_DN60423_c0_g1_i5	1	p3	(AGG)6	18	24	41
	TRINITY_DN60496_c0_g1_i2	1	p1	(C)10	10	157	166
	TRINITY_DN60476_c0_g1_i2	1	p3	(TCC)6	18	109	126
	TRINITY_DN60442_c0_g1_i3	1	p2	(TG)6	12	89	100
	TRINITY_DN60442_c0_g1_i2	1	p2	(TG)6	12	89	100
	TRINITY_DN60410_c0_g1_i6	1	p1	(T)10	10	537	546
	TRINITY_DN60410_c0_g1_i2	1	p1	(T)10	10	652	661
	TRINITY_DN84315_c0_g1_i2	1	p3	(TCG)5	15	114	128
	TRINITY_DN84315_c0_g1_i1	1	p3	(TCG)5	15	114	128
	TRINITY_DN84315_c1_g1_i1	1	p3	(CGA)5	15	245	259
	TRINITY_DN3023_c0_g2_i2	1	p3	(TCT)5	15	333	347
	TRINITY_DN3051_c0_g1_i3	1	p2	(TG)6	12	994	1005
	TRINITY_DN3051_c0_g1_i9	1	p2	(TG)6	12	979	990
	TRINITY_DN3030_c0_g1_i4	1	p4	(CTGT)6	24	2010	2033
	TRINITY_DN3030_c0_g1_i1	1	p4	(CTGT)6	24	2004	2027
	TRINITY_DN3054_c0_g1_i1	1	p3	(CTC)8	24	247	270
	TRINITY_DN3054_c0_g1_i2	1	p3	(CTC)6	18	244	261
	TRINITY_DN3054_c0_g1_i3	1	p3	(CTC)5	15	244	258
	TRINITY_DN3025_c0_g1_i4	1	p3	(CCG)8	24	63	86
	TRINITY_DN3025_c0_g1_i4	2	p3	(ACG)5	15	291	305
	TRINITY_DN3025_c0_g1_i7	1	p3	(ACG)5	15	291	305
	TRINITY_DN3025_c0_g1_i1	1	p3	(ACG)5	15	291	305
	TRINITY_DN3025_c0_g1_i6	1	p3	(ACG)5	15	291	305
	TRINITY_DN3025_c0_g1_i5	1	p3	(ACG)5	15	291	305
	TRINITY_DN3025_c0_g1_i8	1	p3	(ACG)5	15	291	305
	TRINITY_DN3025_c0_g1_i2	1	p3	(ACG)5	15	291	305
	TRINITY_DN3025_c0_g1_i3	1	p3	(ACG)5	15	291	305
	TRINITY_DN3099_c3_g1_i1	1	p3	(GGC)6	18	15	32
	TRINITY_DN3016_c0_g1_i11	1	p2	(GA)6	12	380	391
	TRINITY_DN3016_c0_g1_i2	1	p2	(GA)6	12	380	391
	TRINITY_DN3017_c0_g1_i6	1	p2	(CG)6	12	113	124
	TRINITY_DN3017_c0_g1_i4	1	p2	(CG)6	12	113	124
	TRINITY_DN3017_c0_g1_i2	1	p2	(CG)6	12	113	124
	TRINITY_DN3077_c0_g1_i4	1	p3	(TCC)5	15	33	47
	TRINITY_DN3077_c0_g1_i3	1	p3	(TCC)5	15	33	47
	TRINITY_DN3077_c0_g1_i5	1	p3	(TCC)5	15	33	47
	TRINITY_DN3077_c0_g1_i1	1	p3	(TCC)5	15	33	47
	TRINITY_DN3077_c0_g1_i2	1	p3	(TCC)5	15	33	47
	TRINITY_DN3077_c0_g2_i1	1	p3	(CGC)5	15	28	42
	TRINITY_DN3046_c0_g1_i7	1	p3	(CGC)5	15	133	147
	TRINITY_DN3046_c0_g1_i2	1	c	(CCG)6cgccgcccgtctcgcccgccggcttgtcctccctccacctccccagcgaagcgccggt(CGC)5	91	65	155
	TRINITY_DN3046_c0_g1_i4	1	p3	(CGC)5	15	168	182
	TRINITY_DN3046_c0_g1_i10	1	p3	(CGC)5	15	168	182
	TRINITY_DN3046_c0_g1_i1	1	p3	(CGC)5	15	133	147
	TRINITY_DN3046_c0_g1_i9	1	p3	(CGC)5	15	168	182
	TRINITY_DN3046_c0_g1_i6	1	p3	(CGC)5	15	168	182
	TRINITY_DN3046_c0_g1_i5	1	p3	(CGC)5	15	133	147
	TRINITY_DN3046_c0_g1_i8	1	p3	(CGC)5	15	168	182
	TRINITY_DN3046_c0_g1_i3	1	p3	(CGC)5	15	133	147
	TRINITY_DN3009_c0_g1_i2	1	p3	(TTG)8	24	1818	1841
	TRINITY_DN3009_c0_g1_i7	1	p3	(TTG)8	24	2214	2237
	TRINITY_DN3009_c0_g1_i10	1	p3	(TTG)8	24	2214	2237
	TRINITY_DN3009_c0_g1_i4	1	p3	(TTG)8	24	2068	2091
	TRINITY_DN3009_c0_g1_i1	1	p3	(TTG)8	24	1818	1841
	TRINITY_DN3009_c0_g1_i5	1	p3	(TTG)8	24	1964	1987
	TRINITY_DN3009_c0_g1_i3	1	p3	(TTG)8	24	1964	1987
	TRINITY_DN3009_c0_g1_i6	1	p3	(TTG)8	24	1964	1987
	TRINITY_DN3005_c1_g1_i9	1	p3	(GAA)5	15	79	93
	TRINITY_DN3005_c1_g1_i2	1	p3	(GAA)5	15	79	93
	TRINITY_DN3005_c1_g1_i6	1	p2	(TG)6	12	530	541
	TRINITY_DN3047_c0_g1_i14	1	p3	(CCG)5	15	71	85
	TRINITY_DN3047_c0_g1_i7	1	p3	(CCG)5	15	71	85
	TRINITY_DN3031_c0_g2_i1	1	p3	(GGC)5	15	749	763
	TRINITY_DN3052_c0_g1_i15	1	c	(GCA)5gatgatgcagcaggctctgctcatgcaccagcac(CAG)5	64	365	428
	TRINITY_DN3052_c0_g1_i10	1	p3	(GCA)5	15	365	379
	TRINITY_DN3052_c0_g1_i11	1	p3	(GCA)5	15	365	379
	TRINITY_DN3052_c0_g1_i8	1	c	(GCA)5gatgatgcagcaggcgctgctcatgcaccac(CAG)6	64	391	454
	TRINITY_DN3052_c0_g1_i3	1	p1	(T)10	10	192	201
	TRINITY_DN3052_c0_g1_i3	2	c	(GCA)5gatgatgcagcaggctctgctcatgcaccagcac(CAG)5	64	396	459
	TRINITY_DN3052_c0_g1_i2	1	p1	(T)10	10	192	201
	TRINITY_DN3052_c0_g1_i2	2	c	(GCA)5gatgatgcagcaggctctgctcatgcaccagcac(CAG)5	64	396	459
	TRINITY_DN3052_c1_g1_i1	1	p3	(CAG)6	18	46	63
	TRINITY_DN3022_c0_g1_i7	1	p3	(AGC)5	15	7835	7849
	TRINITY_DN3022_c0_g1_i6	1	p3	(AGC)5	15	7835	7849
	TRINITY_DN3076_c0_g1_i11	1	p3	(TTG)5	15	1113	1127
	TRINITY_DN3076_c0_g1_i5	1	p3	(TTG)5	15	1245	1259
	TRINITY_DN3076_c0_g1_i7	1	p3	(TTG)5	15	1141	1155
	TRINITY_DN3076_c0_g1_i1	1	p3	(GCA)6	18	77	94
	TRINITY_DN3076_c0_g1_i8	1	p3	(TTG)5	15	1141	1155
	TRINITY_DN3076_c0_g4_i2	1	p3	(GCA)6	18	77	94
	TRINITY_DN3015_c0_g1_i8	1	p1	(A)13	13	100	112
	TRINITY_DN3015_c0_g1_i9	1	p1	(A)13	13	100	112
	TRINITY_DN3027_c0_g1_i9	1	p2	(CT)6	12	1712	1723
	TRINITY_DN3027_c0_g1_i5	1	p2	(CT)6	12	1449	1460
	TRINITY_DN3027_c0_g1_i6	1	p2	(CT)6	12	1720	1731
	TRINITY_DN3027_c0_g1_i7	1	p3	(CCG)6	18	239	256
	TRINITY_DN3027_c0_g1_i7	2	p2	(CT)6	12	1721	1732
	TRINITY_DN3091_c0_g1_i3	1	p1	(T)11	11	1832	1842
	TRINITY_DN3091_c0_g1_i1	1	p1	(T)11	11	1831	1841
	TRINITY_DN3068_c0_g1_i12	1	p2	(TC)7	14	170	183
	TRINITY_DN3068_c0_g1_i6	1	p2	(TC)7	14	170	183
	TRINITY_DN3068_c0_g1_i9	1	p2	(TC)7	14	170	183
	TRINITY_DN3068_c0_g1_i5	1	p2	(TC)7	14	170	183
	TRINITY_DN3068_c0_g1_i11	1	p2	(TC)7	14	170	183
	TRINITY_DN3012_c0_g1_i15	1	p2	(GT)6	12	1876	1887
	TRINITY_DN3012_c0_g1_i13	1	p2	(GT)6	12	1899	1910
	TRINITY_DN3012_c0_g1_i2	1	p2	(GT)6	12	1876	1887
	TRINITY_DN3012_c0_g1_i3	1	p2	(GT)6	12	906	917
	TRINITY_DN3012_c0_g1_i10	1	p2	(GT)6	12	816	827
	TRINITY_DN3012_c0_g1_i1	1	p2	(GT)6	12	906	917
	TRINITY_DN3012_c0_g1_i16	1	p2	(GT)6	12	1899	1910
	TRINITY_DN3012_c0_g1_i14	1	p2	(GT)6	12	1876	1887
	TRINITY_DN3012_c0_g1_i7	1	p2	(GT)6	12	1899	1910
	TRINITY_DN3029_c0_g1_i2	1	p3	(CCT)6	18	44	61
	TRINITY_DN3029_c0_g1_i4	1	p3	(CCT)6	18	44	61
	TRINITY_DN3080_c0_g1_i1	1	p3	(CCG)5	15	664	678
	TRINITY_DN3080_c0_g1_i2	1	p3	(CCG)5	15	650	664
	TRINITY_DN3080_c1_g2_i4	1	p3	(CCG)7	21	43	63
	TRINITY_DN3080_c1_g2_i4	2	p3	(GAT)6	18	1230	1247
	TRINITY_DN3080_c1_g2_i4	3	c	(AG)10cttaggtctagggtttgtttttgtaatcctttattaataggaagggcgtccttgtattgattcattcccaacaagaat(A)10	108	3233	3340
	TRINITY_DN3080_c1_g2_i3	1	p3	(CCG)7	21	43	63
	TRINITY_DN3080_c1_g2_i8	1	p3	(CCG)7	21	43	63
	TRINITY_DN3080_c1_g2_i8	2	p3	(GAT)6	18	1230	1247
	TRINITY_DN3080_c1_g2_i8	3	p1	(A)10	10	3316	3325
	TRINITY_DN3080_c1_g2_i7	1	p3	(CCG)7	21	43	63
	TRINITY_DN3080_c1_g2_i1	1	p3	(GAT)6	18	128	145
	TRINITY_DN3080_c1_g2_i1	2	c	(AG)10cttaggtctagggtttgtttttgtaatcctttattaataggaagggcgtccttgtattgattcattcccaacaagaat(A)10	108	2131	2238
	TRINITY_DN3080_c1_g2_i5	1	p3	(CCG)7	21	43	63
	TRINITY_DN3080_c1_g2_i2	1	p3	(GAT)6	18	128	145
	TRINITY_DN3080_c1_g2_i6	1	p3	(GAT)6	18	128	145
	TRINITY_DN3080_c1_g2_i6	2	p1	(A)10	10	2214	2223
	TRINITY_DN3080_c3_g1_i1	1	p3	(GAT)5	15	221	235
	TRINITY_DN3080_c3_g1_i2	1	p3	(GAT)5	15	222	236
	TRINITY_DN3065_c1_g1_i1	1	p3	(GCT)6	18	78	95
	TRINITY_DN3065_c1_g1_i4	1	p3	(GCT)6	18	146	163
	TRINITY_DN3075_c0_g1_i17	1	p1	(A)11	11	57	67
	TRINITY_DN3064_c0_g1_i11	1	p1	(A)11	11	1726	1736
	TRINITY_DN3000_c0_g1_i7	1	p1	(A)10	10	2481	2490
	TRINITY_DN3000_c0_g1_i3	1	p1	(A)10	10	3434	3443
	TRINITY_DN3024_c0_g1_i3	1	p3	(CGG)8	24	44	67
	TRINITY_DN3024_c0_g1_i2	1	p3	(CGG)8	24	44	67
	TRINITY_DN3024_c0_g1_i4	1	p3	(CGG)8	24	44	67
	TRINITY_DN3024_c0_g1_i1	1	p3	(CGG)8	24	44	67
	TRINITY_DN3024_c0_g1_i5	1	p3	(CGG)8	24	44	67
	TRINITY_DN3004_c0_g1_i6	1	p3	(GCG)5	15	67	81
	TRINITY_DN3026_c0_g1_i7	1	p3	(TGA)5	15	556	570
	TRINITY_DN3093_c0_g2_i1	1	p3	(GCC)5	15	566	580
	TRINITY_DN3002_c0_g1_i18	1	c	(CT)9ttctc(TG)11	45	2199	2243
	TRINITY_DN3002_c0_g1_i4	1	p3	(GTC)5	15	448	462
	TRINITY_DN3081_c0_g1_i1	1	p3	(CGG)5	15	625	639
	TRINITY_DN58607_c0_g1_i2	1	p1	(A)10	10	22	31
	TRINITY_DN58607_c0_g1_i1	1	p1	(A)10	10	22	31
	TRINITY_DN58628_c0_g1_i2	1	p3	(AAG)5	15	190	204
	TRINITY_DN58684_c0_g1_i4	1	p1	(A)10	10	121	130
	TRINITY_DN58665_c0_g1_i5	1	p1	(A)10	10	145	154
	TRINITY_DN58665_c0_g1_i6	1	p1	(A)10	10	145	154
	TRINITY_DN58665_c0_g2_i1	1	p1	(A)14	14	187	200
	TRINITY_DN58675_c0_g1_i3	1	p1	(T)10	10	270	279
	TRINITY_DN58693_c0_g1_i2	1	p3	(TTG)8	24	32	55
	TRINITY_DN58616_c0_g1_i2	1	p1	(T)10	10	2319	2328
	TRINITY_DN58642_c0_g2_i1	1	p1	(A)11	11	166	176
	TRINITY_DN58661_c1_g2_i1	1	p1	(A)11	11	975	985
	TRINITY_DN16145_c0_g1_i2	1	p2	(TG)6	12	3217	3228
	TRINITY_DN16145_c0_g1_i11	1	p2	(TG)6	12	2439	2450
	TRINITY_DN16184_c0_g1_i1	1	p3	(GCA)5	15	271	285
	TRINITY_DN16199_c0_g1_i1	1	p3	(CCG)5	15	117	131
	TRINITY_DN16139_c1_g1_i11	1	p2	(TG)7	14	215	228
	TRINITY_DN16139_c1_g1_i17	1	p2	(TG)7	14	105	118
	TRINITY_DN16151_c0_g1_i3	1	p2	(GA)7	14	26	39
	TRINITY_DN16155_c0_g1_i7	1	p6	(GACTAT)7	42	1029	1070
	TRINITY_DN16155_c0_g1_i8	1	p6	(GACTAT)7	42	317	358
	TRINITY_DN16155_c0_g1_i6	1	p6	(GACTAT)7	42	1013	1054
	TRINITY_DN16155_c0_g1_i15	1	p6	(GACTAT)7	42	1487	1528
	TRINITY_DN16155_c0_g1_i11	1	p6	(GACTAT)7	42	2549	2590
	TRINITY_DN16155_c0_g1_i1	1	p6	(GACTAT)7	42	1487	1528
	TRINITY_DN16153_c0_g1_i4	1	p3	(GCC)5	15	176	190
	TRINITY_DN16153_c0_g1_i6	1	p3	(GCC)5	15	176	190
	TRINITY_DN16153_c0_g1_i2	1	p3	(GCC)5	15	176	190
	TRINITY_DN16153_c0_g1_i5	1	p3	(GCC)5	15	176	190
	TRINITY_DN16179_c0_g1_i1	1	p3	(TAG)6	18	326	343
	TRINITY_DN16149_c0_g1_i1	1	p3	(CCG)5	15	86	100
	TRINITY_DN16125_c0_g1_i12	1	p1	(A)11	11	312	322
	TRINITY_DN16117_c0_g1_i1	1	p1	(T)10	10	1063	1072
	TRINITY_DN16180_c0_g1_i5	1	p3	(GGT)6	18	217	234
	TRINITY_DN16180_c0_g1_i4	1	p3	(GGT)6	18	217	234
	TRINITY_DN16160_c0_g1_i4	1	p3	(CGA)7	21	244	264
	TRINITY_DN16134_c0_g2_i1	1	p3	(TGA)5	15	232	246
	TRINITY_DN16134_c0_g2_i2	1	p3	(TGA)5	15	196	210
	TRINITY_DN16181_c0_g1_i5	1	p3	(CGG)5	15	235	249
	TRINITY_DN16181_c0_g1_i3	1	c	(CCG)5cccgggccgctagggtttcgggcagccgcgaggccagcgtcgatgagtctgacggcgtcgccgactggggcctccccaacggcggcgcggcctgcta(CGG)5	127	123	249
	TRINITY_DN16181_c0_g1_i2	1	c	(CCG)5cccgggccgctagggtttcgggcagccgcgaggccagcgtcgatgagtctgacggcgtcgccgactggggcctccccaacggcggcgcggcctgcta(CGG)5	127	123	249
	TRINITY_DN16181_c0_g1_i1	1	c	(CCG)5cccgggccgctagggtttcgggcagccgcgaggccagcgtcgatgagtctgacggcgtcgccgactggggcctccccaacggcggcgcggcctgcta(CGG)5	127	123	249
	TRINITY_DN16111_c0_g2_i1	1	p1	(A)10	10	2442	2451
	TRINITY_DN16111_c0_g6_i1	1	c	(CTT)5(ATT)6	33	387	419
	TRINITY_DN16140_c0_g1_i5	1	p3	(GCC)5	15	42	56
	TRINITY_DN16140_c0_g1_i1	1	p3	(GCC)5	15	42	56
	TRINITY_DN16140_c0_g1_i13	1	p3	(GCC)5	15	42	56
	TRINITY_DN16140_c0_g1_i9	1	p3	(GCC)5	15	42	56
	TRINITY_DN16140_c0_g1_i10	1	p3	(GCC)5	15	42	56
	TRINITY_DN16146_c0_g1_i3	1	p3	(CGG)5	15	14	28
	TRINITY_DN16158_c0_g1_i5	1	p1	(A)11	11	4755	4765
	TRINITY_DN16167_c0_g1_i1	1	c	(CTC)5cgccgccgccgcgtccttcaacggctgggccgacctccccgccgacacggacctccccttcagcctcccgcagcagtccctcgccgccgccccg(CTC)5	124	275	398
	TRINITY_DN16167_c0_g1_i6	1	p3	(CTC)5	15	284	298
	TRINITY_DN16167_c0_g1_i2	1	p3	(CTC)5	15	167	181
	TRINITY_DN16167_c0_g2_i1	1	p1	(C)13	13	220	232
	TRINITY_DN16108_c0_g3_i1	1	p1	(T)10	10	613	622
	TRINITY_DN16192_c0_g1_i5	1	p4	(AGAA)5	20	159	178
	TRINITY_DN16130_c0_g3_i2	1	p4	(TTCT)5	20	1041	1060
	TRINITY_DN16141_c0_g1_i2	1	p2	(AG)10	20	1556	1575
	TRINITY_DN16169_c0_g2_i7	1	p1	(G)10	10	2435	2444
	TRINITY_DN16169_c0_g2_i2	1	p1	(A)10	10	1094	1103
	TRINITY_DN16169_c0_g2_i6	1	p1	(T)10	10	1702	1711
	TRINITY_DN16169_c1_g1_i1	1	p2	(CA)12	24	38	61
	TRINITY_DN16115_c0_g1_i11	1	p2	(TC)17	34	190	223
	TRINITY_DN16115_c0_g1_i14	1	p2	(TC)17	34	190	223
	TRINITY_DN16115_c0_g1_i16	1	p2	(TC)17	34	190	223
	TRINITY_DN16115_c0_g1_i13	1	p2	(TC)17	34	190	223
	TRINITY_DN16128_c0_g1_i15	1	p3	(GGA)6	18	207	224
	TRINITY_DN16128_c0_g1_i14	1	p3	(GGA)6	18	207	224
	TRINITY_DN16128_c0_g1_i9	1	c	(GGA)6cgcgtacgaggacgagat(GGA)6	54	207	260
	TRINITY_DN16128_c0_g1_i3	1	c	(GGA)6cgcgtacgaggacgagat(GGA)6	54	207	260
	TRINITY_DN16128_c0_g1_i12	1	p3	(GGA)5	15	231	245
	TRINITY_DN16128_c0_g1_i16	1	p3	(GGA)5	15	231	245
	TRINITY_DN16128_c0_g1_i5	1	p3	(GGA)6	18	207	224
	TRINITY_DN16128_c0_g1_i1	1	p3	(GGA)5	15	231	245
	TRINITY_DN16128_c0_g1_i2	1	p3	(GGA)5	15	231	245
	TRINITY_DN16106_c1_g1_i2	1	p1	(A)12	12	1677	1688
	TRINITY_DN16106_c1_g1_i1	1	p1	(A)12	12	1425	1436
	TRINITY_DN16161_c0_g1_i6	1	p3	(GCA)7	21	364	384
	TRINITY_DN16161_c0_g1_i3	1	p3	(GCA)7	21	410	430
	TRINITY_DN16197_c0_g1_i18	1	p1	(T)10	10	1380	1389
	TRINITY_DN16197_c0_g1_i2	1	p1	(T)10	10	1348	1357
	TRINITY_DN16197_c0_g1_i8	1	p1	(T)10	10	1015	1024
	TRINITY_DN16197_c0_g1_i21	1	p1	(T)10	10	1015	1024
	TRINITY_DN16197_c0_g1_i17	1	p1	(T)10	10	1348	1357
	TRINITY_DN94812_c0_g1_i1	1	c	(A)10tccctttccg(CA)11	42	125	166
	TRINITY_DN94883_c0_g1_i1	1	p3	(CCT)5	15	66	80
	TRINITY_DN94881_c0_g1_i2	1	p2	(AG)8	16	75	90
	TRINITY_DN94895_c0_g1_i1	1	p1	(A)10	10	319	328
	TRINITY_DN94871_c0_g4_i1	1	p4	(TTTG)6	24	653	676
	TRINITY_DN94871_c0_g4_i2	1	p4	(TTTG)6	24	259	282
	TRINITY_DN93823_c0_g1_i2	1	p3	(AGC)5	15	675	689
	TRINITY_DN93823_c0_g1_i7	1	p3	(AGC)5	15	675	689
	TRINITY_DN93823_c0_g1_i1	1	p3	(AGC)5	15	675	689
	TRINITY_DN93823_c0_g1_i6	1	p3	(AGC)5	15	675	689
	TRINITY_DN93899_c2_g2_i1	1	p3	(AAC)5	15	243	257
	TRINITY_DN93831_c0_g1_i3	1	p3	(GCG)5	15	1908	1922
	TRINITY_DN93852_c0_g1_i1	1	p3	(CAA)10	30	519	548
	TRINITY_DN93892_c1_g2_i1	1	p2	(GT)17	34	449	482
	TRINITY_DN93892_c1_g2_i2	1	p2	(GT)17	34	567	600
	TRINITY_DN93868_c0_g1_i2	1	p2	(TG)7	14	505	518
	TRINITY_DN82903_c0_g2_i1	1	p1	(T)11	11	59	69
	TRINITY_DN82970_c0_g1_i4	1	p1	(A)12	12	1758	1769
	TRINITY_DN82970_c0_g1_i5	1	p1	(A)12	12	905	916
	TRINITY_DN82970_c0_g1_i2	1	p1	(A)12	12	1745	1756
	TRINITY_DN82970_c0_g1_i1	1	p1	(A)12	12	1749	1760
	TRINITY_DN82927_c0_g1_i4	1	p4	(CCGT)5	20	281	300
	TRINITY_DN82917_c0_g1_i1	1	p3	(TAT)7	21	445	465
	TRINITY_DN82979_c0_g1_i1	1	p1	(T)10	10	475	484
	TRINITY_DN82945_c0_g1_i1	1	p2	(GT)6	12	395	406
	TRINITY_DN49695_c0_g1_i1	1	p5	(TCTTT)5	25	411	435
	TRINITY_DN49642_c0_g2_i1	1	p1	(A)11	11	293	303
	TRINITY_DN49690_c1_g1_i1	1	p3	(GGA)5	15	387	401
	TRINITY_DN49670_c0_g1_i3	1	c	(GA)10gcgagt(GA)7	40	60	99
	TRINITY_DN49640_c0_g1_i14	1	p1	(T)10	10	3817	3826
	TRINITY_DN49640_c0_g1_i13	1	p1	(T)10	10	3936	3945
	TRINITY_DN49640_c0_g1_i11	1	p1	(T)10	10	3858	3867
	TRINITY_DN49608_c0_g1_i1	1	p1	(T)12	12	564	575
	TRINITY_DN49694_c0_g1_i1	1	p3	(CGC)6	18	298	315
	TRINITY_DN49694_c0_g1_i2	1	p3	(CGC)5	15	250	264
	TRINITY_DN49677_c0_g1_i1	1	p1	(T)11	11	196	206
	TRINITY_DN49693_c0_g1_i1	1	p3	(CCT)5	15	55	69
	TRINITY_DN49644_c0_g2_i2	1	p1	(T)10	10	225	234
	TRINITY_DN49644_c0_g2_i1	1	p1	(T)10	10	209	218
	TRINITY_DN49609_c0_g1_i2	1	p1	(A)10	10	235	244
	TRINITY_DN74433_c0_g1_i1	1	p3	(CGC)6	18	29	46
	TRINITY_DN74473_c1_g1_i2	1	p4	(GATG)6	24	213	236
	TRINITY_DN74454_c0_g1_i1	1	p3	(AGG)6	18	722	739
	TRINITY_DN74459_c0_g1_i1	1	p2	(GT)7	14	86	99
	TRINITY_DN74442_c0_g4_i1	1	p1	(A)10	10	157	166
	TRINITY_DN74461_c1_g1_i1	1	p1	(T)10	10	149	158
	TRINITY_DN74418_c0_g1_i1	1	p3	(GGC)6	18	192	209
	TRINITY_DN74418_c0_g1_i6	1	p3	(GGC)6	18	192	209
	TRINITY_DN74418_c0_g2_i1	1	p3	(CCT)5	15	213	227
	TRINITY_DN77460_c0_g1_i2	1	p2	(CA)6	12	378	389
	TRINITY_DN77409_c0_g3_i2	1	p2	(TC)7	14	141	154
	TRINITY_DN77499_c0_g1_i2	1	p1	(T)11	11	120	130
	TRINITY_DN77412_c0_g1_i1	1	p2	(CT)7	14	332	345
	TRINITY_DN77412_c0_g1_i4	1	p2	(CT)7	14	332	345
	TRINITY_DN77412_c0_g1_i4	2	p1	(T)10	10	1056	1065
	TRINITY_DN77412_c0_g1_i2	1	p2	(CT)7	14	271	284
	TRINITY_DN77412_c0_g1_i2	2	p1	(T)10	10	995	1004
	TRINITY_DN77412_c0_g1_i3	1	p2	(CT)7	14	271	284
	TRINITY_DN77427_c0_g2_i1	1	p1	(A)10	10	320	329
	TRINITY_DN77452_c0_g1_i1	1	p1	(A)11	11	245	255
	TRINITY_DN77452_c0_g1_i2	1	p1	(A)11	11	245	255
	TRINITY_DN77452_c0_g1_i6	1	p1	(A)10	10	249	258
	TRINITY_DN77452_c0_g1_i5	1	p1	(A)10	10	248	257
	TRINITY_DN77452_c0_g1_i4	1	p1	(A)10	10	248	257
	TRINITY_DN87824_c0_g1_i1	1	p3	(CGC)5	15	108	122
	TRINITY_DN87856_c0_g1_i1	1	p3	(TCA)5	15	91	105
	TRINITY_DN87848_c0_g1_i1	1	p3	(CTT)5	15	54	68
	TRINITY_DN87840_c0_g1_i2	1	p1	(A)10	10	400	409
	TRINITY_DN87851_c2_g1_i1	1	p3	(GTT)7	21	100	120
	TRINITY_DN87851_c2_g3_i1	1	p3	(TCT)5	15	243	257
	TRINITY_DN87851_c2_g3_i2	1	p3	(TCT)5	15	243	257
	TRINITY_DN87865_c0_g1_i1	1	p1	(T)10	10	145	154
	TRINITY_DN58075_c0_g1_i1	1	p3	(CCG)5	15	23	37
	TRINITY_DN58071_c0_g1_i2	1	p3	(GAC)7	21	482	502
	TRINITY_DN58071_c0_g1_i4	1	p3	(GAC)7	21	482	502
	TRINITY_DN58089_c0_g1_i13	1	p1	(T)10	10	659	668
	TRINITY_DN58010_c2_g1_i1	1	p3	(CTC)5	15	21	35
	TRINITY_DN58027_c0_g1_i1	1	p3	(CGA)5	15	128	142
	TRINITY_DN58026_c1_g1_i5	1	p2	(GA)6	12	153	164
	TRINITY_DN58072_c0_g1_i3	1	p3	(TCG)5	15	295	309
	TRINITY_DN58072_c0_g1_i7	1	p3	(TCG)5	15	397	411
	TRINITY_DN58064_c0_g2_i1	1	p3	(ATG)5	15	113	127
	TRINITY_DN58086_c1_g3_i1	1	p1	(T)10	10	823	832
	TRINITY_DN58092_c0_g1_i2	1	p2	(TG)7	14	613	626
	TRINITY_DN58021_c0_g2_i2	1	p3	(ACG)5	15	86	100
	TRINITY_DN58021_c0_g2_i1	1	p3	(ACG)5	15	86	100
	TRINITY_DN58054_c0_g1_i2	1	p3	(TGA)5	15	1624	1638
	TRINITY_DN58068_c0_g1_i4	1	p5	(CCTCT)5	25	161	185
	TRINITY_DN58047_c0_g1_i5	1	p2	(AT)6	12	1117	1128
	TRINITY_DN58047_c0_g1_i1	1	p2	(AT)6	12	1662	1673
	TRINITY_DN58047_c0_g1_i3	1	p2	(AT)6	12	1200	1211
	TRINITY_DN58047_c0_g1_i8	1	p2	(AT)6	12	1768	1779
	TRINITY_DN58047_c0_g1_i4	1	p2	(AT)6	12	1267	1278
	TRINITY_DN58079_c0_g1_i1	1	p3	(CCT)5	15	548	562
	TRINITY_DN58019_c0_g1_i2	1	p3	(GCG)5	15	75	89
	TRINITY_DN58019_c1_g1_i2	1	p3	(AAG)12	36	27	62
	TRINITY_DN2426_c0_g1_i1	1	p2	(GA)9	18	775	792
	TRINITY_DN2426_c0_g1_i4	1	p2	(GA)6	12	154	165
	TRINITY_DN2426_c0_g2_i2	1	p2	(CA)6	12	553	564
	TRINITY_DN2426_c0_g2_i1	1	p2	(TC)6	12	542	553
	TRINITY_DN2404_c1_g2_i2	1	p1	(A)26	26	52	77
	TRINITY_DN2404_c1_g2_i7	1	p1	(A)21	21	57	77
	TRINITY_DN2468_c0_g1_i3	1	p3	(GCA)5	15	632	646
	TRINITY_DN2468_c0_g1_i11	1	p3	(GCA)5	15	632	646
	TRINITY_DN2468_c0_g1_i9	1	p3	(GCA)5	15	632	646
	TRINITY_DN2468_c0_g1_i7	1	p3	(GCA)5	15	602	616
	TRINITY_DN2468_c0_g1_i10	1	p3	(GCA)5	15	605	619
	TRINITY_DN2468_c0_g1_i12	1	p3	(GCA)5	15	605	619
	TRINITY_DN2468_c0_g1_i1	1	p3	(GCA)5	15	632	646
	TRINITY_DN2468_c0_g1_i4	1	p3	(GCA)5	15	602	616
	TRINITY_DN2468_c0_g1_i6	1	p3	(GCA)5	15	605	619
	TRINITY_DN2418_c0_g1_i1	1	p3	(AGA)5	15	208	222
	TRINITY_DN2418_c0_g2_i2	1	p3	(TTC)5	15	647	661
	TRINITY_DN2418_c0_g2_i2	2	p2	(CT)8	16	947	962
	TRINITY_DN2418_c0_g2_i6	1	p3	(TTC)5	15	632	646
	TRINITY_DN2418_c0_g2_i6	2	p2	(CT)8	16	914	929
	TRINITY_DN2418_c0_g2_i3	1	p3	(TTC)5	15	647	661
	TRINITY_DN2418_c0_g2_i3	2	p2	(CT)8	16	929	944
	TRINITY_DN2490_c0_g1_i10	1	p2	(CT)7	14	18	31
	TRINITY_DN2490_c0_g1_i6	1	p2	(CT)7	14	18	31
	TRINITY_DN2490_c0_g1_i3	1	p2	(CT)7	14	18	31
	TRINITY_DN2490_c0_g1_i8	1	p2	(CT)7	14	18	31
	TRINITY_DN2490_c0_g1_i1	1	p2	(TC)6	12	21	32
	TRINITY_DN2447_c0_g3_i1	1	p3	(GCC)6	18	112	129
	TRINITY_DN2447_c1_g1_i2	1	p1	(A)10	10	1561	1570
	TRINITY_DN2406_c1_g2_i3	1	p4	(AAGA)6	24	524	547
	TRINITY_DN2406_c1_g2_i1	1	p4	(GAAA)6	24	25	48
	TRINITY_DN2406_c2_g1_i2	1	p4	(AAAG)8	32	1638	1669
	TRINITY_DN2406_c2_g1_i1	1	p1	(A)10	10	1505	1514
	TRINITY_DN2406_c2_g1_i1	2	p4	(AAAG)8	32	3076	3107
	TRINITY_DN2402_c0_g1_i2	1	p3	(CCT)6	18	846	863
	TRINITY_DN2402_c0_g1_i4	1	p1	(A)10	10	974	983
	TRINITY_DN2402_c0_g1_i1	1	p3	(CCT)6	18	846	863
	TRINITY_DN2402_c0_g1_i3	1	p1	(A)10	10	966	975
	TRINITY_DN2402_c0_g1_i5	1	p3	(CCT)6	18	857	874
	TRINITY_DN2402_c1_g1_i1	1	p2	(CG)6	12	227	238
	TRINITY_DN2434_c0_g1_i7	1	p3	(CTC)7	21	99	119
	TRINITY_DN2434_c0_g1_i6	1	p5	(CCTCT)5	25	46	70
	TRINITY_DN2434_c0_g1_i4	1	p5	(CCTCT)5	25	46	70
	TRINITY_DN2434_c0_g1_i9	1	p5	(CCTCT)5	25	46	70
	TRINITY_DN2455_c0_g1_i6	1	p3	(GAG)8	24	1500	1523
	TRINITY_DN2455_c0_g1_i10	1	p3	(GAG)5	15	1514	1528
	TRINITY_DN2455_c0_g1_i4	1	p3	(GAG)5	15	1500	1514
	TRINITY_DN2455_c0_g1_i1	1	p3	(GAG)8	24	1514	1537
	TRINITY_DN2455_c0_g1_i3	1	p3	(GAG)5	15	1287	1301
	TRINITY_DN2455_c1_g1_i10	1	p3	(AGG)7	21	46	66
	TRINITY_DN2455_c1_g1_i6	1	p3	(AGG)7	21	46	66
	TRINITY_DN2455_c1_g1_i5	1	p3	(AGG)7	21	46	66
	TRINITY_DN2455_c1_g1_i5	2	p2	(TG)6	12	1599	1610
	TRINITY_DN2455_c1_g1_i9	1	p3	(AGG)7	21	46	66
	TRINITY_DN2455_c1_g1_i7	1	p3	(AGG)6	18	49	66
	TRINITY_DN2455_c1_g1_i11	1	p3	(AGG)7	21	46	66
	TRINITY_DN2455_c1_g1_i11	2	p2	(TG)6	12	1599	1610
	TRINITY_DN2455_c1_g1_i8	1	p3	(AGG)7	21	46	66
	TRINITY_DN2455_c1_g1_i8	2	c	(TG)8tatgtaaataa(GAG)5	42	1567	1608
	TRINITY_DN2422_c0_g1_i4	1	p3	(TCC)5	15	123	137
	TRINITY_DN2422_c0_g1_i11	1	p3	(TCC)5	15	123	137
	TRINITY_DN2422_c0_g1_i5	1	p3	(TCC)5	15	123	137
	TRINITY_DN2422_c0_g1_i12	1	p3	(TCC)5	15	123	137
	TRINITY_DN2422_c0_g1_i1	1	p3	(TCC)5	15	123	137
	TRINITY_DN2422_c0_g1_i10	1	p3	(TCC)5	15	123	137
	TRINITY_DN2463_c0_g1_i11	1	p3	(CTC)5	15	210	224
	TRINITY_DN2463_c0_g1_i6	1	p3	(CTC)5	15	218	232
	TRINITY_DN2463_c0_g1_i5	1	p3	(CTC)5	15	210	224
	TRINITY_DN2463_c0_g1_i9	1	p3	(CTC)5	15	218	232
	TRINITY_DN2463_c0_g1_i4	1	p3	(CTC)5	15	218	232
	TRINITY_DN2469_c0_g1_i5	1	p3	(GCC)6	18	200	217
	TRINITY_DN2469_c0_g1_i11	1	p3	(GCC)6	18	200	217
	TRINITY_DN2469_c0_g1_i11	2	p1	(A)10	10	2123	2132
	TRINITY_DN2469_c0_g1_i18	1	p3	(GCC)6	18	200	217
	TRINITY_DN2469_c0_g1_i2	1	p1	(A)10	10	1577	1586
	TRINITY_DN2469_c0_g1_i10	1	p1	(T)10	10	139	148
	TRINITY_DN2469_c0_g1_i7	1	p3	(GCC)6	18	200	217
	TRINITY_DN2469_c0_g1_i7	2	p1	(A)10	10	2195	2204
	TRINITY_DN2469_c0_g1_i16	1	p1	(T)10	10	139	148
	TRINITY_DN2469_c0_g1_i16	2	p1	(T)10	10	372	381
	TRINITY_DN2469_c0_g1_i4	1	p3	(GCC)6	18	200	217
	TRINITY_DN2469_c0_g1_i9	1	p3	(GCC)6	18	200	217
	TRINITY_DN2469_c0_g1_i13	1	p1	(T)10	10	372	381
	TRINITY_DN2469_c0_g1_i3	1	p3	(GCC)6	18	200	217
	TRINITY_DN2469_c0_g1_i8	1	p3	(GCC)6	18	200	217
	TRINITY_DN2498_c0_g1_i7	1	p1	(A)12	12	1230	1241
	TRINITY_DN2498_c0_g1_i1	1	p1	(A)12	12	1232	1243
	TRINITY_DN2498_c1_g1_i2	1	p1	(A)13	13	13	25
	TRINITY_DN2465_c0_g1_i1	1	p3	(CGG)5	15	59	73
	TRINITY_DN2465_c0_g1_i2	1	p3	(CGG)5	15	59	73
	TRINITY_DN2436_c0_g1_i5	1	p3	(GCC)5	15	338	352
	TRINITY_DN2436_c0_g1_i9	1	p3	(GCC)5	15	268	282
	TRINITY_DN2436_c2_g1_i1	1	p3	(CCT)5	15	233	247
	TRINITY_DN2436_c2_g1_i3	1	p3	(CCT)5	15	233	247
	TRINITY_DN2440_c0_g1_i4	1	p1	(T)10	10	1271	1280
	TRINITY_DN2440_c0_g1_i1	1	p1	(T)10	10	895	904
	TRINITY_DN2440_c0_g2_i1	1	p3	(TTG)8	24	987	1010
	TRINITY_DN2440_c0_g2_i3	1	p3	(TTG)5	15	1071	1085
	TRINITY_DN2488_c0_g1_i1	1	p3	(CTC)5	15	21	35
	TRINITY_DN2486_c1_g2_i4	1	p3	(GGA)5	15	239	253
	TRINITY_DN2486_c1_g2_i3	1	p3	(GGA)5	15	239	253
	TRINITY_DN2486_c1_g2_i1	1	p3	(GGA)5	15	239	253
	TRINITY_DN2486_c1_g2_i2	1	p3	(GGA)5	15	239	253
	TRINITY_DN2415_c0_g1_i8	1	p1	(T)10	10	83	92
	TRINITY_DN2415_c0_g1_i3	1	p1	(T)10	10	83	92
	TRINITY_DN2415_c0_g1_i9	1	p1	(T)10	10	83	92
	TRINITY_DN2415_c0_g1_i9	2	p1	(T)10	10	1228	1237
	TRINITY_DN2415_c0_g1_i2	1	p1	(T)10	10	2033	2042
	TRINITY_DN2415_c0_g1_i5	1	p1	(T)10	10	2033	2042
	TRINITY_DN2421_c0_g1_i2	1	p3	(CCG)8	24	69	92
	TRINITY_DN2421_c0_g1_i6	1	p3	(CCG)8	24	69	92
	TRINITY_DN2421_c0_g1_i5	1	p3	(CCG)5	15	35	49
	TRINITY_DN2421_c0_g1_i3	1	p3	(CCG)5	15	35	49
	TRINITY_DN2438_c0_g1_i1	1	p1	(T)20	20	621	640
	TRINITY_DN2438_c0_g1_i2	1	p2	(AC)6	12	112	123
	TRINITY_DN2438_c0_g1_i4	1	p2	(AC)6	12	112	123
	TRINITY_DN2449_c0_g1_i1	1	p3	(CTC)5	15	41	55
	TRINITY_DN2449_c0_g1_i3	1	p3	(CTC)5	15	41	55
	TRINITY_DN2449_c0_g1_i4	1	p3	(CTC)5	15	41	55
	TRINITY_DN2449_c0_g1_i5	1	p3	(CTC)5	15	41	55
	TRINITY_DN2449_c0_g1_i8	1	p3	(CTC)5	15	41	55
	TRINITY_DN2449_c0_g1_i7	1	p3	(CTC)5	15	41	55
	TRINITY_DN2431_c0_g2_i3	1	p3	(AGC)5	15	126	140
	TRINITY_DN2431_c0_g2_i4	1	p3	(AGC)5	15	126	140
	TRINITY_DN2456_c0_g1_i5	1	p1	(T)10	10	1757	1766
	TRINITY_DN2456_c0_g1_i6	1	p1	(T)10	10	1757	1766
	TRINITY_DN2405_c0_g1_i3	1	p2	(GT)6	12	4607	4618
	TRINITY_DN2405_c0_g1_i1	1	p2	(GT)6	12	4355	4366
	TRINITY_DN2405_c0_g2_i3	1	p2	(TG)6	12	3977	3988
	TRINITY_DN2405_c0_g2_i4	1	p2	(TG)6	12	3977	3988
	TRINITY_DN2405_c0_g2_i2	1	p2	(TG)6	12	3977	3988
	TRINITY_DN2453_c0_g2_i2	1	p3	(CCG)7	21	39	59
	TRINITY_DN2453_c0_g2_i2	2	p3	(CGG)5	15	316	330
	TRINITY_DN2453_c0_g2_i1	1	p3	(CCG)7	21	39	59
	TRINITY_DN2453_c0_g2_i1	2	p3	(CGG)5	15	316	330
	TRINITY_DN2453_c0_g2_i4	1	p3	(CCG)7	21	39	59
	TRINITY_DN2453_c0_g2_i4	2	p3	(CGG)5	15	316	330
	TRINITY_DN2444_c0_g1_i6	1	c	(T)10aga(T)11	24	379	402
	TRINITY_DN2444_c1_g1_i5	1	p3	(AAG)8	24	1250	1273
	TRINITY_DN2475_c0_g1_i5	1	p2	(CT)6	12	1350	1361
	TRINITY_DN2475_c0_g1_i13	1	p2	(CT)6	12	1242	1253
	TRINITY_DN2475_c0_g1_i1	1	p2	(CT)11	22	1252	1273
	TRINITY_DN2475_c0_g1_i14	1	p2	(CT)11	22	1360	1381
	TRINITY_DN2475_c1_g1_i5	1	p1	(A)10	10	1257	1266
	TRINITY_DN2475_c1_g1_i4	1	p3	(TCC)5	15	83	97
	TRINITY_DN2475_c1_g1_i1	1	p3	(TCC)5	15	83	97
	TRINITY_DN2475_c1_g1_i3	1	p3	(TCC)5	15	83	97
	TRINITY_DN2475_c2_g1_i1	1	p2	(CT)12	24	32	55
	TRINITY_DN2475_c2_g1_i2	1	p2	(CT)12	24	32	55
	TRINITY_DN2495_c1_g1_i2	1	p2	(TG)9	18	328	345
	TRINITY_DN2425_c0_g1_i2	1	p2	(AG)7	14	20	33
	TRINITY_DN2425_c0_g2_i3	1	p3	(GGA)5	15	237	251
	TRINITY_DN2425_c0_g2_i2	1	p3	(GGA)5	15	237	251
	TRINITY_DN2425_c0_g2_i1	1	p3	(GGA)5	15	237	251
	TRINITY_DN2483_c0_g1_i10	1	p2	(TC)8	16	1982	1997
	TRINITY_DN2483_c0_g1_i6	1	p2	(TC)8	16	2103	2118
	TRINITY_DN2408_c0_g1_i11	1	p1	(T)10	10	520	529
	TRINITY_DN2480_c1_g1_i1	1	p2	(CT)8	16	66	81
	TRINITY_DN2480_c1_g1_i6	1	p2	(CT)8	16	66	81
	TRINITY_DN2450_c0_g1_i1	1	p3	(TAC)5	15	1530	1544
	TRINITY_DN2450_c0_g1_i4	1	p4	(AGTC)5	20	1570	1589
	TRINITY_DN2414_c0_g1_i4	1	p3	(CGC)6	18	125	142
	TRINITY_DN2414_c0_g1_i2	1	p3	(CGC)6	18	125	142
	TRINITY_DN2414_c0_g1_i1	1	p3	(CGC)6	18	120	137
	TRINITY_DN2414_c0_g1_i3	1	p3	(CGC)6	18	120	137
	TRINITY_DN2414_c1_g1_i18	1	p1	(T)11	11	310	320
	TRINITY_DN2414_c1_g1_i19	1	p3	(GCC)7	21	30	50
	TRINITY_DN2414_c1_g1_i2	1	p1	(T)11	11	310	320
	TRINITY_DN2414_c1_g1_i12	1	p3	(GCC)7	21	30	50
	TRINITY_DN2414_c1_g1_i7	1	p3	(GCC)7	21	30	50
	TRINITY_DN2446_c0_g1_i5	1	p4	(GATG)5	20	196	215
	TRINITY_DN2446_c0_g1_i3	1	p4	(GATG)5	20	695	714
	TRINITY_DN2446_c0_g1_i6	1	p4	(GATG)5	20	399	418
	TRINITY_DN2446_c0_g1_i6	2	p2	(AG)7	14	557	570
	TRINITY_DN2446_c0_g1_i4	1	p2	(AG)7	14	355	368
	TRINITY_DN2446_c1_g1_i7	1	p3	(TCT)5	15	197	211
	TRINITY_DN2446_c1_g1_i3	1	p3	(TCT)5	15	197	211
	TRINITY_DN2446_c1_g1_i5	1	p3	(TCT)5	15	197	211
	TRINITY_DN2412_c0_g1_i5	1	p2	(TC)6	12	156	167
	TRINITY_DN2412_c0_g1_i5	2	p2	(GA)6	12	5726	5737
	TRINITY_DN2412_c0_g1_i4	1	p2	(TC)6	12	156	167
	TRINITY_DN2412_c0_g1_i2	1	p2	(TC)6	12	156	167
	TRINITY_DN2412_c0_g1_i3	1	p2	(TC)6	12	156	167
	TRINITY_DN2427_c0_g1_i3	1	p3	(CGT)5	15	834	848
	TRINITY_DN2427_c1_g1_i3	1	p3	(CCT)6	18	151	168
	TRINITY_DN2427_c1_g1_i7	1	p3	(CCT)6	18	151	168
	TRINITY_DN2427_c1_g1_i5	1	p3	(CCT)6	18	151	168
	TRINITY_DN2427_c1_g1_i9	1	p3	(CCT)6	18	151	168
	TRINITY_DN2427_c1_g1_i8	1	p3	(CCT)6	18	151	168
	TRINITY_DN2474_c0_g1_i3	1	p2	(AG)13	26	13	38
	TRINITY_DN2474_c0_g1_i2	1	p2	(AG)13	26	13	38
	TRINITY_DN2474_c0_g1_i7	1	p1	(T)13	13	836	848
	TRINITY_DN2461_c0_g1_i1	1	p3	(GGA)5	15	1730	1744
	TRINITY_DN2461_c0_g1_i7	1	p3	(GGA)5	15	1449	1463
	TRINITY_DN2461_c0_g1_i9	1	p3	(GGA)5	15	1449	1463
	TRINITY_DN2461_c0_g1_i8	1	p3	(GGA)6	18	1449	1466
	TRINITY_DN2461_c0_g1_i3	1	p3	(GGA)6	18	1449	1466
	TRINITY_DN596_c0_g1_i1	1	c	(CAT)6cgttcatagattggcacattcatccttgtattgaagttgatatcacctc(CAT)6	85	5625	5709
	TRINITY_DN596_c0_g1_i2	1	p3	(CAT)6	18	5691	5708
	TRINITY_DN596_c0_g1_i6	1	p3	(CAT)6	18	5691	5708
	TRINITY_DN596_c0_g1_i6	2	p2	(TG)9	18	7289	7306
	TRINITY_DN596_c0_g1_i3	1	p3	(CAT)6	18	5691	5708
	TRINITY_DN596_c0_g1_i3	2	p2	(TG)9	18	7313	7330
	TRINITY_DN549_c0_g1_i6	1	p3	(GTC)5	15	1253	1267
	TRINITY_DN549_c0_g1_i8	1	p3	(GTC)5	15	1253	1267
	TRINITY_DN549_c0_g1_i9	1	p3	(GTC)5	15	1173	1187
	TRINITY_DN549_c0_g1_i5	1	p3	(GTC)5	15	1400	1414
	TRINITY_DN523_c0_g1_i4	1	c	(TCCT)5tccgtccgtcctcactcccctcctcctcctcccggcgatcgcagagaatt(CGC)5	85	132	216
	TRINITY_DN523_c0_g1_i5	1	c	(TCCT)5tccgtccgtcctcactcccctcctcctcctcccggcgatcgcagagaatt(CGC)5	85	132	216
	TRINITY_DN561_c0_g1_i2	1	p3	(AGG)5	15	137	151
	TRINITY_DN561_c0_g1_i7	1	p3	(AGG)5	15	137	151
	TRINITY_DN561_c0_g1_i7	2	p3	(GCT)6	18	2011	2028
	TRINITY_DN561_c0_g1_i5	1	p3	(AGG)5	15	137	151
	TRINITY_DN561_c0_g1_i6	1	p3	(AGG)5	15	137	151
	TRINITY_DN561_c0_g1_i6	2	p3	(TGC)5	15	1804	1818
	TRINITY_DN561_c0_g1_i6	3	p3	(GCT)6	18	2004	2021
	TRINITY_DN561_c0_g1_i1	1	p3	(AGG)5	15	137	151
	TRINITY_DN561_c0_g1_i1	2	p3	(GCT)6	18	2004	2021
	TRINITY_DN561_c2_g1_i1	1	p3	(TGC)5	15	53	67
	TRINITY_DN538_c0_g1_i2	1	p4	(AGGA)5	20	2821	2840
	TRINITY_DN538_c0_g1_i3	1	p4	(AGGA)5	20	2813	2832
	TRINITY_DN586_c1_g1_i10	1	p3	(GCG)5	15	208	222
	TRINITY_DN586_c1_g1_i12	1	p3	(GCG)5	15	208	222
	TRINITY_DN586_c1_g1_i6	1	p3	(GCG)5	15	208	222
	TRINITY_DN586_c1_g1_i5	1	p3	(GCG)7	21	27	47
	TRINITY_DN530_c0_g1_i7	1	p3	(CGC)5	15	132	146
	TRINITY_DN530_c0_g1_i1	1	p3	(CGC)5	15	132	146
	TRINITY_DN530_c0_g1_i8	1	p3	(CGC)5	15	132	146
	TRINITY_DN530_c0_g1_i2	1	p3	(CGC)5	15	132	146
	TRINITY_DN530_c0_g1_i5	1	p3	(CGC)5	15	132	146
	TRINITY_DN569_c0_g1_i3	1	p4	(AAGC)6	24	360	383
	TRINITY_DN569_c0_g1_i5	1	p4	(AAGC)6	24	360	383
	TRINITY_DN569_c0_g1_i2	1	p4	(AAGC)6	24	360	383
	TRINITY_DN569_c0_g1_i7	1	p4	(AAGC)6	24	360	383
	TRINITY_DN507_c0_g1_i5	1	p3	(TGT)7	21	1188	1208
	TRINITY_DN507_c0_g1_i7	1	p3	(GAC)6	18	1955	1972
	TRINITY_DN507_c0_g1_i6	1	p3	(TGT)7	21	1187	1207
	TRINITY_DN507_c0_g1_i2	1	p3	(TGT)7	21	1188	1208
	TRINITY_DN507_c0_g1_i8	1	p3	(TGT)7	21	1187	1207
	TRINITY_DN507_c0_g1_i9	1	p3	(TGT)7	21	1184	1204
	TRINITY_DN550_c0_g1_i8	1	p3	(GAG)5	15	163	177
	TRINITY_DN550_c0_g1_i3	1	p3	(GAG)5	15	163	177
	TRINITY_DN540_c0_g1_i11	1	p2	(TG)8	16	1758	1773
	TRINITY_DN540_c0_g1_i8	1	p2	(TG)8	16	1758	1773
	TRINITY_DN573_c0_g2_i1	1	p2	(TG)6	12	193	204
	TRINITY_DN582_c0_g1_i5	1	p3	(AGC)5	15	277	291
	TRINITY_DN582_c0_g1_i6	1	p3	(AGC)5	15	291	305
	TRINITY_DN582_c0_g1_i2	1	p3	(AGC)5	15	291	305
	TRINITY_DN582_c0_g1_i3	1	p3	(AGC)5	15	277	291
	TRINITY_DN582_c1_g1_i8	1	p1	(T)10	10	1045	1054
	TRINITY_DN518_c0_g1_i6	1	p3	(CCT)5	15	568	582
	TRINITY_DN518_c0_g1_i4	1	p3	(GCG)6	18	217	234
	TRINITY_DN518_c0_g1_i7	1	p3	(GCG)5	15	224	238
	TRINITY_DN518_c0_g1_i10	1	p3	(GCG)5	15	224	238
	TRINITY_DN518_c0_g1_i8	1	p3	(GCG)6	18	219	236
	TRINITY_DN518_c0_g1_i9	1	p3	(GCG)6	18	217	234
	TRINITY_DN518_c0_g1_i1	1	p3	(GCG)6	18	217	234
	TRINITY_DN577_c0_g1_i1	1	p3	(CCG)5	15	257	271
	TRINITY_DN577_c0_g1_i4	1	p3	(CCG)5	15	257	271
	TRINITY_DN577_c0_g1_i5	1	p3	(CCG)5	15	257	271
	TRINITY_DN597_c0_g2_i2	1	p4	(ATGG)5	20	404	423
	TRINITY_DN597_c0_g2_i4	1	p4	(ATGG)5	20	404	423
	TRINITY_DN597_c0_g2_i1	1	p4	(ATGG)5	20	404	423
	TRINITY_DN597_c0_g3_i4	1	p2	(TG)8	16	1517	1532
	TRINITY_DN597_c0_g3_i4	2	p2	(TA)7	14	1921	1934
	TRINITY_DN597_c0_g3_i5	1	p2	(TG)8	16	895	910
	TRINITY_DN597_c0_g3_i5	2	p2	(TA)7	14	1299	1312
	TRINITY_DN597_c0_g3_i2	1	p2	(TG)8	16	517	532
	TRINITY_DN597_c0_g3_i2	2	p2	(TA)7	14	921	934
	TRINITY_DN597_c1_g1_i8	1	p3	(GCG)5	15	160	174
	TRINITY_DN516_c0_g1_i2	1	p1	(T)11	11	711	721
	TRINITY_DN516_c2_g1_i1	1	c	(CT)8g(TC)6	29	171	199
	TRINITY_DN570_c0_g1_i2	1	p2	(CT)6	12	1152	1163
	TRINITY_DN570_c0_g1_i1	1	p2	(CT)6	12	695	706
	TRINITY_DN579_c0_g1_i12	1	p3	(AGC)6	18	433	450
	TRINITY_DN579_c0_g1_i4	1	p3	(GAG)6	18	55	72
	TRINITY_DN579_c0_g1_i4	2	p3	(AGC)6	18	651	668
	TRINITY_DN579_c0_g1_i1	1	p3	(GAG)6	18	55	72
	TRINITY_DN579_c0_g1_i1	2	p3	(AGC)6	18	552	569
	TRINITY_DN579_c0_g1_i8	1	p3	(GAG)6	18	55	72
	TRINITY_DN579_c0_g1_i8	2	p3	(AGC)6	18	651	668
	TRINITY_DN579_c0_g1_i11	1	p3	(GAG)6	18	55	72
	TRINITY_DN579_c0_g1_i11	2	p3	(AGC)6	18	651	668
	TRINITY_DN579_c0_g1_i3	1	p3	(AGC)6	18	339	356
	TRINITY_DN579_c0_g1_i5	1	p3	(AGC)6	18	433	450
	TRINITY_DN579_c0_g1_i2	1	p3	(AGC)6	18	339	356
	TRINITY_DN579_c0_g1_i9	1	p3	(AGC)6	18	339	356
	TRINITY_DN579_c1_g1_i1	1	p2	(GA)6	12	98	109
	TRINITY_DN579_c1_g1_i2	1	p2	(GA)6	12	98	109
	TRINITY_DN581_c0_g1_i2	1	p3	(TGT)12	36	3970	4005
	TRINITY_DN581_c0_g1_i7	1	p3	(TGT)8	24	3970	3993
	TRINITY_DN581_c0_g1_i5	1	p3	(TGT)12	36	3966	4001
	TRINITY_DN581_c0_g1_i1	1	p3	(TGT)12	36	3967	4002
	TRINITY_DN521_c0_g2_i1	1	p3	(TTG)5	15	745	759
	TRINITY_DN547_c1_g1_i3	1	p3	(CAC)6	18	81	98
	TRINITY_DN547_c1_g1_i1	1	p3	(CTT)5	15	214	228
	TRINITY_DN587_c0_g1_i4	1	p1	(A)10	10	1562	1571
	TRINITY_DN535_c0_g1_i4	1	p3	(GGC)5	15	181	195
	TRINITY_DN535_c0_g1_i11	1	p3	(GGC)5	15	181	195
	TRINITY_DN535_c0_g1_i18	1	p3	(GGC)5	15	153	167
	TRINITY_DN535_c0_g1_i2	1	p3	(GGC)5	15	153	167
	TRINITY_DN535_c0_g1_i6	1	p3	(GGC)5	15	153	167
	TRINITY_DN535_c0_g1_i13	1	p3	(GGC)6	18	153	170
	TRINITY_DN535_c0_g1_i14	1	p3	(GGC)6	18	153	170
	TRINITY_DN535_c0_g1_i15	1	p3	(GGC)6	18	153	170
	TRINITY_DN522_c0_g1_i8	1	p2	(TG)6	12	411	422
	TRINITY_DN522_c0_g1_i10	1	p2	(TG)6	12	265	276
	TRINITY_DN522_c0_g1_i5	1	p2	(TG)6	12	411	422
	TRINITY_DN522_c0_g1_i7	1	p2	(TG)6	12	411	422
	TRINITY_DN522_c0_g1_i2	1	p2	(TG)6	12	411	422
	TRINITY_DN522_c0_g1_i9	1	p2	(TG)6	12	411	422
	TRINITY_DN522_c0_g1_i6	1	p2	(TG)6	12	411	422
	TRINITY_DN522_c0_g1_i1	1	p2	(TG)6	12	411	422
	TRINITY_DN522_c0_g1_i3	1	p2	(TG)6	12	411	422
	TRINITY_DN522_c0_g1_i4	1	p2	(TG)6	12	265	276
	TRINITY_DN522_c1_g1_i9	1	p2	(AT)6	12	2223	2234
	TRINITY_DN522_c1_g1_i5	1	p2	(AT)6	12	2260	2271
	TRINITY_DN522_c1_g1_i6	1	p2	(AT)6	12	2260	2271
	TRINITY_DN522_c1_g1_i11	1	p2	(AT)6	12	2223	2234
	TRINITY_DN522_c1_g1_i4	1	p2	(AT)6	12	2267	2278
	TRINITY_DN522_c1_g1_i10	1	p2	(AT)6	12	2230	2241
	TRINITY_DN560_c4_g2_i5	1	p3	(CCG)5	15	112	126
	TRINITY_DN531_c0_g1_i11	1	p1	(C)10	10	314	323
	TRINITY_DN599_c0_g1_i3	1	p3	(CCG)7	21	46	66
	TRINITY_DN599_c0_g1_i6	1	p3	(CCG)6	18	46	63
	TRINITY_DN599_c0_g1_i7	1	p3	(CCG)7	21	46	66
	TRINITY_DN599_c0_g1_i1	1	p3	(CCG)6	18	46	63
	TRINITY_DN599_c0_g1_i2	1	p3	(CCG)7	21	46	66
	TRINITY_DN599_c0_g1_i4	1	p3	(CCG)7	21	46	66
	TRINITY_DN599_c0_g1_i8	1	p3	(CCG)7	21	46	66
	TRINITY_DN599_c0_g1_i5	1	p3	(CCG)6	18	46	63
	TRINITY_DN512_c0_g1_i5	1	p3	(CCT)5	15	1519	1533
	TRINITY_DN512_c0_g1_i10	1	p3	(CCT)5	15	1562	1576
	TRINITY_DN512_c0_g1_i9	1	p3	(CCT)5	15	1515	1529
	TRINITY_DN512_c0_g2_i1	1	p1	(T)10	10	1	10
	TRINITY_DN520_c0_g1_i6	1	p3	(TGA)5	15	1346	1360
	TRINITY_DN520_c0_g1_i4	1	p3	(TGA)5	15	1346	1360
	TRINITY_DN520_c0_g1_i1	1	p3	(TGA)5	15	1346	1360
	TRINITY_DN595_c0_g1_i9	1	p4	(CTGT)5	20	2284	2303
	TRINITY_DN595_c0_g1_i6	1	p1	(T)12	12	2756	2767
	TRINITY_DN595_c0_g1_i10	1	p1	(T)12	12	2756	2767
	TRINITY_DN595_c0_g1_i7	1	p1	(T)12	12	2756	2767
	TRINITY_DN515_c0_g1_i1	1	p2	(GA)6	12	22	33
	TRINITY_DN515_c0_g1_i7	1	p2	(GA)6	12	22	33
	TRINITY_DN515_c0_g1_i4	1	p2	(TC)6	12	218	229
	TRINITY_DN529_c0_g2_i2	1	p3	(GCC)5	15	69	83
	TRINITY_DN529_c0_g2_i3	1	p3	(GCC)5	15	69	83
	TRINITY_DN529_c0_g2_i4	1	p3	(GCC)5	15	69	83
	TRINITY_DN529_c0_g2_i1	1	p3	(GCC)5	15	69	83
	TRINITY_DN529_c4_g1_i1	1	p2	(TG)6	12	176	187
	TRINITY_DN532_c0_g1_i1	1	p2	(GT)18	36	681	716
	TRINITY_DN532_c0_g1_i5	1	p4	(TGAT)5	20	169	188
	TRINITY_DN532_c0_g1_i5	2	p3	(CTG)5	15	1748	1762
	TRINITY_DN532_c0_g1_i2	1	p4	(TGAT)5	20	169	188
	TRINITY_DN532_c0_g1_i2	2	p3	(CTG)5	15	1748	1762
	TRINITY_DN532_c0_g1_i4	1	p2	(GT)18	36	686	721
	TRINITY_DN532_c0_g1_i3	1	p2	(GT)18	36	700	735
	TRINITY_DN532_c0_g3_i2	1	p4	(GCGT)5	20	143	162
	TRINITY_DN532_c0_g3_i1	1	p4	(GCGT)5	20	143	162
	TRINITY_DN557_c0_g1_i8	1	p1	(A)10	10	336	345
	TRINITY_DN557_c0_g1_i2	1	p1	(A)10	10	336	345
	TRINITY_DN557_c0_g1_i3	1	p1	(A)10	10	336	345
	TRINITY_DN541_c0_g1_i15	1	p3	(AGA)5	15	619	633
	TRINITY_DN541_c0_g1_i1	1	p3	(AGA)6	18	632	649
	TRINITY_DN541_c0_g1_i6	1	p3	(AGA)5	15	619	633
	TRINITY_DN541_c0_g1_i9	1	p3	(AGA)5	15	619	633
	TRINITY_DN541_c0_g1_i18	1	p3	(AGA)6	18	632	649
	TRINITY_DN541_c0_g1_i11	1	p3	(AGA)6	18	632	649
	TRINITY_DN541_c0_g1_i17	1	p3	(AGA)5	15	619	633
	TRINITY_DN541_c0_g1_i20	1	p3	(AGA)5	15	619	633
	TRINITY_DN541_c0_g1_i14	1	p3	(AGA)6	18	632	649
	TRINITY_DN541_c0_g1_i4	1	p3	(AGA)5	15	619	633
	TRINITY_DN541_c0_g1_i12	1	p3	(AGA)5	15	619	633
	TRINITY_DN541_c0_g1_i8	1	p3	(AGA)5	15	619	633
	TRINITY_DN541_c0_g1_i13	1	p3	(AGA)5	15	619	633
	TRINITY_DN541_c0_g1_i19	1	p3	(AGA)6	18	632	649
	TRINITY_DN541_c0_g1_i16	1	p3	(AGA)5	15	619	633
	TRINITY_DN541_c0_g1_i5	1	p3	(AGA)5	15	619	633
	TRINITY_DN574_c0_g1_i2	1	p4	(ATCC)5	20	105	124
	TRINITY_DN574_c0_g1_i3	1	p4	(ATCC)5	20	105	124
	TRINITY_DN551_c0_g1_i6	1	p3	(GCC)5	15	258	272
	TRINITY_DN551_c0_g1_i3	1	p3	(GCC)5	15	258	272
	TRINITY_DN551_c0_g1_i13	1	p3	(GCC)5	15	258	272
	TRINITY_DN551_c0_g1_i5	1	p3	(GCC)5	15	258	272
	TRINITY_DN551_c0_g1_i8	1	p3	(GCC)5	15	258	272
	TRINITY_DN551_c0_g1_i10	1	p3	(GCC)5	15	258	272
	TRINITY_DN552_c1_g1_i6	1	p3	(GCG)5	15	672	686
	TRINITY_DN552_c1_g1_i5	1	p3	(GCG)5	15	672	686
	TRINITY_DN501_c0_g1_i2	1	p4	(GGAC)5	20	1291	1310
	TRINITY_DN501_c2_g1_i2	1	c	(GACG)6gaccgacgggaggttcccgaaatggcggtttcggccaaggagcgcaagctgagcaggctcggcagtggtaaggcggcaaac(GGA)5	120	185	304
	TRINITY_DN501_c2_g1_i1	1	p3	(GGA)5	15	230	244
	TRINITY_DN534_c1_g1_i2	1	p3	(AGA)8	24	1877	1900
	TRINITY_DN534_c1_g1_i1	1	p3	(AGA)8	24	1874	1897
	TRINITY_DN534_c1_g1_i5	1	p3	(GCC)7	21	27	47
	TRINITY_DN589_c0_g2_i4	1	p2	(TG)7	14	866	879
	TRINITY_DN527_c0_g2_i8	1	p3	(CGG)5	15	571	585
	TRINITY_DN527_c0_g2_i8	2	p6	(TTTTTC)5	30	2158	2187
	TRINITY_DN527_c0_g2_i6	1	p3	(CGG)5	15	571	585
	TRINITY_DN527_c0_g2_i5	1	p3	(CGG)5	15	572	586
	TRINITY_DN527_c0_g2_i10	1	p3	(CGG)5	15	571	585
	TRINITY_DN527_c0_g2_i10	2	p2	(CT)6	12	1361	1372
	TRINITY_DN527_c0_g2_i1	1	p3	(CGG)5	15	571	585
	TRINITY_DN527_c0_g2_i1	2	p6	(TTTTTC)5	30	2021	2050
	TRINITY_DN527_c0_g2_i3	1	p3	(GCA)5	15	376	390
	TRINITY_DN527_c0_g2_i3	2	p3	(CGG)5	15	577	591
	TRINITY_DN527_c0_g2_i3	3	p2	(CT)6	12	1230	1241
	TRINITY_DN568_c0_g1_i2	1	p1	(T)10	10	637	646
	TRINITY_DN568_c0_g3_i2	1	p3	(CGA)5	15	647	661
	TRINITY_DN568_c0_g3_i3	1	p3	(CGA)5	15	653	667
	TRINITY_DN508_c4_g1_i1	1	p2	(TG)6	12	542	553
	TRINITY_DN508_c4_g1_i1	2	p3	(CAT)5	15	670	684
	TRINITY_DN508_c4_g1_i3	1	p2	(TG)6	12	542	553
	TRINITY_DN45123_c0_g1_i4	1	p3	(GCC)5	15	465	479
	TRINITY_DN45123_c0_g1_i3	1	p3	(GCC)5	15	577	591
	TRINITY_DN45123_c0_g1_i1	1	p2	(CT)6	12	143	154
	TRINITY_DN45123_c0_g1_i1	2	p3	(GCC)5	15	475	489
	TRINITY_DN45123_c0_g1_i2	1	p3	(GCC)5	15	452	466
	TRINITY_DN45122_c0_g1_i2	1	p1	(A)12	12	552	563
	TRINITY_DN45118_c0_g1_i6	1	p2	(TG)8	16	433	448
	TRINITY_DN45118_c0_g1_i1	1	p2	(TG)6	12	190	201
	TRINITY_DN45152_c0_g1_i1	1	p2	(AT)8	16	583	598
	TRINITY_DN45131_c0_g1_i1	1	p1	(T)10	10	2114	2123
	TRINITY_DN45187_c0_g2_i1	1	p3	(AAG)5	15	60	74
	TRINITY_DN45161_c2_g1_i1	1	p2	(TG)7	14	98	111
	TRINITY_DN45186_c0_g2_i8	1	p3	(CGG)5	15	332	346
	TRINITY_DN45129_c0_g2_i1	1	p3	(ACA)8	24	706	729
	TRINITY_DN45188_c0_g1_i4	1	p1	(A)10	10	1800	1809
	TRINITY_DN45165_c0_g3_i2	1	p1	(T)13	13	265	277
	TRINITY_DN45104_c0_g2_i1	1	p1	(A)10	10	139	148
	TRINITY_DN45150_c0_g1_i1	1	p3	(GAG)5	15	441	455
	TRINITY_DN99992_c0_g1_i1	1	p1	(A)10	10	1173	1182
	TRINITY_DN99942_c0_g1_i1	1	c	(A)12cttac(T)10	27	625	651
	TRINITY_DN5991_c0_g1_i2	1	p3	(CAC)6	18	441	458
	TRINITY_DN5907_c0_g2_i5	1	p3	(CGC)5	15	67	81
	TRINITY_DN5907_c0_g2_i4	1	p3	(CGC)5	15	67	81
	TRINITY_DN5907_c0_g2_i1	1	p3	(CGC)7	21	67	87
	TRINITY_DN5907_c0_g2_i3	1	p3	(CGC)5	15	67	81
	TRINITY_DN5950_c0_g1_i8	1	p3	(CAG)7	21	134	154
	TRINITY_DN5950_c0_g1_i5	1	p3	(CAG)7	21	134	154
	TRINITY_DN5950_c0_g1_i4	1	p3	(CAG)7	21	134	154
	TRINITY_DN5950_c0_g1_i6	1	p3	(CAG)7	21	134	154
	TRINITY_DN5950_c1_g1_i1	1	p3	(GCA)5	15	136	150
	TRINITY_DN5928_c1_g1_i4	1	p3	(GTC)5	15	562	576
	TRINITY_DN5928_c1_g1_i6	1	p3	(GTC)5	15	553	567
	TRINITY_DN5928_c1_g1_i1	1	p3	(GTC)5	15	553	567
	TRINITY_DN5928_c1_g1_i2	1	p3	(GTC)5	15	553	567
	TRINITY_DN5928_c1_g1_i3	1	p3	(GTC)5	15	565	579
	TRINITY_DN5916_c0_g1_i17	1	p1	(T)10	10	1268	1277
	TRINITY_DN5916_c0_g1_i18	1	p1	(T)10	10	1256	1265
	TRINITY_DN5916_c0_g1_i15	1	p1	(T)10	10	1292	1301
	TRINITY_DN5916_c0_g1_i3	1	p1	(T)10	10	1249	1258
	TRINITY_DN5916_c0_g1_i5	1	p1	(T)10	10	1261	1270
	TRINITY_DN5916_c0_g1_i4	1	p1	(T)10	10	1285	1294
	TRINITY_DN5996_c0_g3_i1	1	p3	(GCC)6	18	17	34
	TRINITY_DN5974_c0_g1_i3	1	p2	(TG)7	14	659	672
	TRINITY_DN5974_c0_g1_i1	1	p2	(TG)8	16	497	512
	TRINITY_DN5922_c0_g1_i2	1	p3	(GCC)6	18	76	93
	TRINITY_DN5922_c0_g1_i7	1	p3	(GCC)6	18	76	93
	TRINITY_DN5922_c0_g1_i4	1	p3	(GCC)6	18	76	93
	TRINITY_DN5922_c0_g1_i1	1	p3	(GCC)6	18	76	93
	TRINITY_DN5922_c0_g1_i3	1	p3	(GCC)5	15	79	93
	TRINITY_DN5922_c0_g1_i5	1	p3	(GCC)6	18	76	93
	TRINITY_DN5922_c0_g1_i6	1	p3	(GCC)6	18	76	93
	TRINITY_DN5922_c1_g1_i1	1	p3	(GCC)5	15	197	211
	TRINITY_DN5937_c0_g1_i8	1	p3	(GAT)5	15	638	652
	TRINITY_DN5937_c0_g1_i13	1	p3	(GAT)5	15	653	667
	TRINITY_DN5937_c0_g1_i1	1	p3	(GAT)5	15	639	653
	TRINITY_DN5937_c0_g1_i10	1	c	(GAT)5aataagtttccgatgtcgtcgaacagcctttcctttgccttgttagctgcttccacagaatctaagacttga(GAT)5	102	648	749
	TRINITY_DN5937_c0_g1_i3	1	p3	(GAT)5	15	638	652
	TRINITY_DN5937_c0_g1_i12	1	p3	(GAT)5	15	654	668
	TRINITY_DN5937_c0_g1_i5	1	p3	(GAT)5	15	653	667
	TRINITY_DN5937_c1_g1_i4	1	p3	(ATG)8	24	1290	1313
	TRINITY_DN5977_c0_g2_i1	1	p3	(GAG)6	18	114	131
	TRINITY_DN5929_c0_g1_i1	1	p1	(A)14	14	1176	1189
	TRINITY_DN5993_c0_g1_i10	1	p2	(CT)6	12	63	74
	TRINITY_DN5993_c0_g1_i14	1	p2	(CT)6	12	63	74
	TRINITY_DN5993_c0_g1_i3	1	p2	(CT)6	12	63	74
	TRINITY_DN5972_c0_g2_i1	1	p3	(CCT)6	18	111	128
	TRINITY_DN5972_c2_g1_i2	1	p3	(GCC)5	15	317	331
	TRINITY_DN5972_c2_g1_i5	1	p3	(GCC)5	15	248	262
	TRINITY_DN5968_c0_g1_i1	1	p2	(GC)6	12	376	387
	TRINITY_DN5968_c0_g1_i3	1	p2	(GC)6	12	376	387
	TRINITY_DN5968_c0_g1_i2	1	p2	(GC)6	12	376	387
	TRINITY_DN5998_c0_g2_i5	1	c	(CTC)7acgtccaaactgctggtgctcctctcaacctcctcctg(CT)17	93	911	1003
	TRINITY_DN5998_c1_g1_i4	1	p3	(CTC)7	21	33	53
	TRINITY_DN5998_c1_g1_i1	1	p3	(CTC)5	15	39	53
	TRINITY_DN5998_c1_g1_i6	1	p3	(CTC)7	21	33	53
	TRINITY_DN5999_c0_g1_i3	1	p3	(TCC)6	18	153	170
	TRINITY_DN5999_c0_g1_i2	1	p3	(TCC)6	18	153	170
	TRINITY_DN5999_c0_g2_i1	1	p1	(C)16	16	280	295
	TRINITY_DN5900_c0_g1_i3	1	p1	(A)10	10	253	262
	TRINITY_DN5967_c0_g1_i5	1	p2	(CA)13	26	2	27
	TRINITY_DN5918_c0_g2_i6	1	p3	(GCC)5	15	66	80
	TRINITY_DN5918_c0_g2_i3	1	p3	(GCC)5	15	66	80
	TRINITY_DN5918_c0_g2_i1	1	p3	(GCC)5	15	66	80
	TRINITY_DN5988_c0_g4_i1	1	p3	(CTT)5	15	922	936
	TRINITY_DN5988_c0_g4_i2	1	p3	(CTT)5	15	922	936
	TRINITY_DN5989_c0_g1_i3	1	p3	(GCG)5	15	44	58
	TRINITY_DN5989_c0_g1_i3	2	p3	(GAG)5	15	215	229
	TRINITY_DN5989_c0_g1_i5	1	p3	(GAG)5	15	215	229
	TRINITY_DN5989_c0_g1_i4	1	p3	(GAG)5	15	215	229
	TRINITY_DN5989_c0_g1_i7	1	p3	(GCG)5	15	44	58
	TRINITY_DN5989_c0_g1_i2	1	p3	(GAG)5	15	215	229
	TRINITY_DN5989_c0_g1_i6	1	p3	(GCG)5	15	44	58
	TRINITY_DN5989_c0_g1_i6	2	p3	(GAG)5	15	215	229
	TRINITY_DN5935_c0_g1_i2	1	p2	(TG)12	24	834	857
	TRINITY_DN5932_c0_g1_i1	1	p1	(T)10	10	1317	1326
	TRINITY_DN5994_c1_g1_i1	1	p2	(GA)6	12	288	299
	TRINITY_DN5970_c0_g1_i2	1	p3	(CGC)5	15	52	66
	TRINITY_DN5970_c0_g1_i1	1	p3	(CGC)5	15	227	241
	TRINITY_DN5970_c0_g1_i3	1	p3	(CGC)5	15	52	66
	TRINITY_DN5970_c0_g1_i4	1	p3	(CGC)5	15	227	241
	TRINITY_DN5970_c0_g1_i5	1	p3	(CGC)5	15	52	66
	TRINITY_DN5944_c0_g1_i10	1	p1	(T)10	10	4058	4067
	TRINITY_DN5944_c0_g1_i16	1	p3	(GGA)5	15	635	649
	TRINITY_DN5944_c0_g1_i17	1	p1	(T)10	10	4029	4038
	TRINITY_DN5944_c0_g1_i2	1	p3	(GGA)5	15	638	652
	TRINITY_DN5944_c0_g1_i3	1	p3	(GGA)5	15	609	623
	TRINITY_DN5944_c0_g1_i11	1	p3	(GGA)5	15	635	649
	TRINITY_DN5944_c0_g1_i15	1	p3	(GGA)5	15	638	652
	TRINITY_DN5944_c0_g1_i14	1	p3	(GGA)5	15	609	623
	TRINITY_DN5944_c0_g1_i18	1	p3	(GGA)5	15	609	623
	TRINITY_DN5944_c0_g1_i4	1	p3	(GGA)5	15	638	652
	TRINITY_DN5944_c0_g1_i19	1	p3	(GGA)5	15	609	623
	TRINITY_DN5940_c0_g1_i1	1	p3	(CCT)5	15	48	62
	TRINITY_DN5940_c0_g1_i3	1	p3	(CCT)5	15	48	62
	TRINITY_DN5963_c0_g1_i8	1	p3	(CCA)5	15	16	30
	TRINITY_DN5949_c0_g1_i6	1	p2	(GA)8	16	212	227
	TRINITY_DN5949_c2_g1_i1	1	p2	(GA)7	14	15	28
	TRINITY_DN5949_c3_g1_i2	1	p5	(GGAAA)10	50	178	227
	TRINITY_DN5924_c3_g1_i1	1	p2	(AT)6	12	1284	1295
	TRINITY_DN5969_c0_g1_i2	1	p2	(TC)19	38	77	114
	TRINITY_DN5969_c0_g1_i4	1	p2	(TC)19	38	77	114
	TRINITY_DN5912_c0_g1_i7	1	p3	(CGC)5	15	16	30
	TRINITY_DN5912_c0_g1_i3	1	p3	(CCG)7	21	17	37
	TRINITY_DN5912_c0_g1_i2	1	p3	(CCG)7	21	17	37
	TRINITY_DN5912_c0_g1_i6	1	p3	(CCG)7	21	17	37
	TRINITY_DN5934_c0_g1_i8	1	p1	(A)10	10	1590	1599
	TRINITY_DN5919_c0_g1_i3	1	p3	(AGG)5	15	314	328
	TRINITY_DN5976_c0_g1_i4	1	p3	(GCC)5	15	336	350
	TRINITY_DN5976_c0_g1_i1	1	p3	(GCC)5	15	336	350
	TRINITY_DN5976_c0_g1_i6	1	p3	(GCC)5	15	285	299
	TRINITY_DN5976_c0_g1_i5	1	p3	(GCC)5	15	336	350
	TRINITY_DN5976_c0_g1_i3	1	p3	(GCC)5	15	336	350
	TRINITY_DN5976_c0_g1_i2	1	p3	(GCC)5	15	336	350
	TRINITY_DN84534_c1_g1_i2	1	p2	(GT)7	14	227	240
	TRINITY_DN84534_c6_g1_i1	1	p3	(TTG)6	18	25	42
	TRINITY_DN84561_c0_g1_i2	1	p3	(ATG)6	18	44	61
	TRINITY_DN84561_c0_g1_i1	1	p3	(ATG)6	18	44	61
	TRINITY_DN84514_c0_g1_i1	1	p1	(T)10	10	237	246
	TRINITY_DN84563_c0_g1_i1	1	c	(CT)12aaaaaacactaccacacacgcgctcgcacata(CT)7	70	29	98
	TRINITY_DN84563_c0_g1_i1	2	p2	(GT)6	12	1400	1411
	TRINITY_DN84591_c0_g1_i1	1	p3	(GCG)5	15	133	147
	TRINITY_DN52125_c0_g1_i1	1	p2	(CT)10	20	500	519
	TRINITY_DN52125_c1_g1_i2	1	p2	(CT)9	18	424	441
	TRINITY_DN52125_c3_g2_i1	1	p2	(GA)12	24	278	301
	TRINITY_DN52176_c0_g1_i1	1	p1	(G)10	10	224	233
	TRINITY_DN52131_c0_g1_i1	1	p2	(GT)9	18	273	290
	TRINITY_DN52192_c0_g2_i2	1	p1	(A)10	10	1649	1658
	TRINITY_DN52177_c0_g1_i1	1	p4	(GACC)5	20	150	169
	TRINITY_DN52151_c0_g1_i1	1	p1	(T)10	10	866	875
	TRINITY_DN52190_c1_g1_i2	1	p3	(GAC)5	15	202	216
	TRINITY_DN52116_c3_g1_i1	1	p1	(A)10	10	154	163
	TRINITY_DN70779_c0_g1_i1	1	p1	(T)10	10	1092	1101
	TRINITY_DN70725_c0_g1_i1	1	p1	(A)11	11	233	243
	TRINITY_DN70729_c0_g1_i3	1	p1	(T)10	10	319	328
	TRINITY_DN979_c0_g1_i8	1	p2	(CA)8	16	205	220
	TRINITY_DN979_c0_g1_i6	1	p2	(CA)12	24	126	149
	TRINITY_DN979_c0_g1_i7	1	p2	(CA)11	22	126	147
	TRINITY_DN979_c0_g1_i5	1	p2	(CA)11	22	126	147
	TRINITY_DN979_c0_g1_i4	1	p2	(CA)11	22	126	147
	TRINITY_DN979_c0_g1_i9	1	p2	(CA)11	22	126	147
	TRINITY_DN979_c0_g1_i2	1	p2	(CA)7	14	207	220
	TRINITY_DN979_c0_g1_i1	1	p2	(AC)8	16	206	221
	TRINITY_DN909_c0_g2_i1	1	p3	(AAG)5	15	487	501
	TRINITY_DN994_c2_g1_i1	1	p2	(TC)6	12	95	106
	TRINITY_DN953_c0_g1_i4	1	p2	(GA)16	32	502	533
	TRINITY_DN953_c0_g1_i1	1	p2	(GA)16	32	502	533
	TRINITY_DN953_c1_g1_i3	1	p2	(TC)6	12	78	89
	TRINITY_DN954_c0_g2_i1	1	p3	(ATG)6	18	1203	1220
	TRINITY_DN954_c0_g2_i3	1	p3	(ATG)6	18	1203	1220
	TRINITY_DN921_c0_g1_i11	1	p3	(AAG)5	15	799	813
	TRINITY_DN921_c0_g1_i2	1	p3	(AAG)5	15	778	792
	TRINITY_DN921_c0_g1_i8	1	p3	(AAG)5	15	799	813
	TRINITY_DN921_c0_g1_i4	1	p3	(AAG)5	15	778	792
	TRINITY_DN921_c0_g1_i3	1	p3	(AAG)5	15	799	813
	TRINITY_DN921_c0_g1_i9	1	p3	(AAG)5	15	799	813
	TRINITY_DN921_c0_g1_i7	1	p3	(AAG)5	15	778	792
	TRINITY_DN921_c0_g1_i6	1	p3	(AAG)5	15	778	792
	TRINITY_DN921_c0_g1_i10	1	p3	(AAG)5	15	778	792
	TRINITY_DN921_c0_g1_i5	1	p3	(AAG)5	15	778	792
	TRINITY_DN921_c0_g1_i1	1	p3	(AAG)5	15	799	813
	TRINITY_DN959_c1_g1_i2	1	p1	(T)10	10	772	781
	TRINITY_DN937_c4_g1_i1	1	p3	(TCG)5	15	94	108
	TRINITY_DN918_c0_g1_i5	1	p3	(AGG)5	15	1202	1216
	TRINITY_DN918_c1_g2_i2	1	p2	(GT)6	12	389	400
	TRINITY_DN918_c3_g1_i1	1	p1	(A)10	10	197	206
	TRINITY_DN995_c0_g1_i4	1	c	(TC)8tgccccgggccgcggactt(TC)8	51	481	531
	TRINITY_DN995_c0_g1_i5	1	p2	(GA)12	24	384	407
	TRINITY_DN995_c0_g1_i1	1	p2	(TC)8	16	516	531
	TRINITY_DN995_c0_g1_i11	1	c	(TC)8tgccccgggccgcggactt(TC)8	51	481	531
	TRINITY_DN916_c0_g2_i1	1	p3	(GCC)6	18	176	193
	TRINITY_DN911_c0_g1_i1	1	c	(CACG)6ca(GCAC)6	50	90	139
	TRINITY_DN911_c0_g2_i5	1	p4	(GCAC)5	20	42	61
	TRINITY_DN907_c0_g1_i7	1	p1	(A)10	10	1873	1882
	TRINITY_DN907_c0_g1_i8	1	p1	(A)10	10	1875	1884
	TRINITY_DN907_c0_g1_i2	1	p1	(A)10	10	2044	2053
	TRINITY_DN965_c0_g1_i4	1	p3	(CGC)7	21	141	161
	TRINITY_DN965_c0_g1_i5	1	p3	(CGC)7	21	141	161
	TRINITY_DN965_c0_g1_i1	1	p3	(CGC)7	21	141	161
	TRINITY_DN965_c0_g1_i3	1	p3	(CGC)5	15	141	155
	TRINITY_DN965_c0_g1_i6	1	p3	(CGC)7	21	141	161
	TRINITY_DN965_c0_g1_i2	1	p3	(CGC)7	21	141	161
	TRINITY_DN965_c1_g1_i1	1	p3	(CCG)5	15	208	222
	TRINITY_DN965_c2_g1_i2	1	p3	(CCG)6	18	226	243
	TRINITY_DN923_c0_g1_i1	1	p2	(AG)8	16	150	165
	TRINITY_DN923_c0_g2_i4	1	p3	(TGC)6	18	513	530
	TRINITY_DN923_c0_g2_i5	1	p3	(TCT)5	15	635	649
	TRINITY_DN923_c0_g2_i3	1	p3	(TCT)5	15	635	649
	TRINITY_DN923_c0_g2_i2	1	p3	(TGC)6	18	513	530
	TRINITY_DN923_c0_g2_i1	1	p3	(TCT)5	15	635	649
	TRINITY_DN960_c0_g1_i4	1	p1	(A)10	10	13	22
	TRINITY_DN904_c1_g1_i3	1	p3	(GCC)5	15	497	511
	TRINITY_DN904_c1_g1_i3	2	p2	(GT)9	18	852	869
	TRINITY_DN904_c1_g1_i1	1	p3	(CCG)7	21	446	466
	TRINITY_DN904_c1_g1_i9	1	p2	(GT)9	18	840	857
	TRINITY_DN904_c1_g1_i2	1	p3	(GCC)5	15	497	511
	TRINITY_DN904_c1_g1_i2	2	p2	(GT)9	18	852	869
	TRINITY_DN904_c1_g1_i7	1	p2	(GT)9	18	840	857
	TRINITY_DN904_c1_g1_i4	1	p3	(GCC)5	15	497	511
	TRINITY_DN904_c1_g1_i4	2	p2	(GT)9	18	852	869
	TRINITY_DN975_c0_g1_i6	1	p3	(GCT)6	18	869	886
	TRINITY_DN975_c0_g1_i2	1	p3	(TAC)5	15	423	437
	TRINITY_DN975_c0_g1_i4	1	p3	(GGC)5	15	181	195
	TRINITY_DN975_c0_g1_i3	1	p3	(TCT)5	15	448	462
	TRINITY_DN975_c0_g1_i3	2	p3	(GGT)5	15	841	855
	TRINITY_DN975_c0_g1_i5	1	p3	(GGC)5	15	181	195
	TRINITY_DN975_c0_g1_i7	1	p3	(TCT)5	15	467	481
	TRINITY_DN975_c0_g1_i7	2	p3	(GGT)5	15	860	874
	TRINITY_DN984_c0_g1_i5	1	p3	(AGA)5	15	781	795
	TRINITY_DN984_c0_g1_i3	1	p3	(AGA)5	15	781	795
	TRINITY_DN984_c0_g1_i7	1	p3	(AGA)5	15	781	795
	TRINITY_DN984_c0_g1_i4	1	p3	(AGA)5	15	781	795
	TRINITY_DN951_c0_g1_i2	1	p3	(TGG)6	18	228	245
	TRINITY_DN963_c0_g1_i3	1	p3	(CGA)8	24	41	64
	TRINITY_DN963_c0_g1_i1	1	p3	(CGA)8	24	41	64
	TRINITY_DN963_c0_g1_i4	1	p3	(CGA)8	24	41	64
	TRINITY_DN987_c0_g2_i7	1	p3	(CAG)5	15	799	813
	TRINITY_DN987_c0_g2_i6	1	p3	(CAG)5	15	839	853
	TRINITY_DN987_c0_g2_i5	1	p3	(CAG)5	15	839	853
	TRINITY_DN987_c0_g2_i2	1	p3	(CAG)5	15	854	868
	TRINITY_DN910_c1_g1_i2	1	p3	(GGA)5	15	252	266
	TRINITY_DN980_c0_g1_i8	1	p1	(T)10	10	1720	1729
	TRINITY_DN980_c0_g1_i4	1	p1	(T)10	10	1717	1726
	TRINITY_DN980_c0_g1_i6	1	p1	(T)10	10	1723	1732
	TRINITY_DN980_c0_g1_i9	1	p1	(T)10	10	1726	1735
	TRINITY_DN932_c1_g1_i3	1	p3	(GCG)5	15	72	86
	TRINITY_DN932_c1_g1_i2	1	p3	(GCG)5	15	521	535
	TRINITY_DN967_c0_g1_i2	1	p3	(CTC)6	18	588	605
	TRINITY_DN967_c0_g1_i1	1	p3	(CTC)6	18	588	605
	TRINITY_DN926_c0_g1_i9	1	p2	(TA)7	14	1165	1178
	TRINITY_DN926_c0_g1_i1	1	p2	(TA)7	14	1170	1183
	TRINITY_DN926_c0_g1_i5	1	p2	(TA)7	14	1170	1183
	TRINITY_DN926_c0_g1_i3	1	p2	(TA)7	14	941	954
	TRINITY_DN926_c0_g1_i8	1	p2	(TA)7	14	941	954
	TRINITY_DN900_c0_g1_i4	1	p3	(GCA)6	18	1317	1334
	TRINITY_DN900_c0_g1_i3	1	p3	(CCG)5	15	1052	1066
	TRINITY_DN900_c0_g1_i3	2	p3	(GCA)6	18	1320	1337
	TRINITY_DN900_c0_g1_i2	1	p3	(CCG)5	15	1052	1066
	TRINITY_DN999_c0_g1_i6	1	p2	(TG)6	12	436	447
	TRINITY_DN999_c0_g2_i1	1	p2	(GA)10	20	245	264
	TRINITY_DN999_c0_g2_i2	1	p2	(GA)10	20	245	264
	TRINITY_DN988_c0_g1_i5	1	p1	(T)10	10	1575	1584
	TRINITY_DN988_c0_g1_i2	1	p1	(T)10	10	1575	1584
	TRINITY_DN988_c0_g1_i1	1	p1	(T)10	10	1575	1584
	TRINITY_DN988_c0_g1_i4	1	p1	(T)10	10	1575	1584
	TRINITY_DN949_c0_g1_i7	1	p3	(GCC)5	15	189	203
	TRINITY_DN949_c0_g1_i10	1	p3	(GCC)5	15	189	203
	TRINITY_DN949_c0_g1_i2	1	p3	(CCG)5	15	106	120
	TRINITY_DN949_c0_g1_i12	1	p3	(CCG)5	15	106	120
	TRINITY_DN949_c0_g1_i11	1	p3	(CCG)5	15	106	120
	TRINITY_DN949_c0_g1_i9	1	p3	(CCG)5	15	106	120
	TRINITY_DN949_c0_g1_i8	1	p3	(GCC)5	15	189	203
	TRINITY_DN949_c0_g1_i1	1	p3	(CCG)5	15	106	120
	TRINITY_DN949_c0_g2_i1	1	p3	(CGC)5	15	2	16
	TRINITY_DN939_c0_g1_i2	1	p3	(GGC)5	15	557	571
	TRINITY_DN939_c0_g1_i5	1	p3	(GGC)5	15	527	541
	TRINITY_DN939_c0_g1_i9	1	p3	(GGC)5	15	527	541
	TRINITY_DN939_c0_g1_i4	1	p3	(GGC)5	15	784	798
	TRINITY_DN944_c0_g1_i2	1	p1	(T)10	10	3216	3225
	TRINITY_DN941_c0_g1_i3	1	p1	(T)10	10	818	827
	TRINITY_DN917_c0_g2_i7	1	p4	(AATC)6	24	2130	2153
	TRINITY_DN917_c0_g2_i1	1	p4	(AATC)6	24	2130	2153
	TRINITY_DN986_c0_g1_i4	1	p2	(TG)9	18	226	243
	TRINITY_DN986_c0_g1_i2	1	p2	(TG)9	18	193	210
	TRINITY_DN943_c0_g1_i2	1	p2	(AG)9	18	59	76
	TRINITY_DN943_c0_g1_i1	1	p2	(AG)9	18	59	76
	TRINITY_DN943_c0_g2_i1	1	p2	(TC)6	12	1315	1326
	TRINITY_DN933_c2_g1_i3	1	p3	(CCA)5	15	117	131
	TRINITY_DN998_c0_g1_i11	1	p2	(AG)6	12	220	231
	TRINITY_DN998_c0_g1_i11	2	p3	(GAT)5	15	1309	1323
	TRINITY_DN998_c0_g1_i3	1	p3	(GAT)5	15	1144	1158
	TRINITY_DN998_c0_g1_i1	1	p3	(GGA)5	15	289	303
	TRINITY_DN998_c0_g1_i12	1	p3	(GGA)5	15	289	303
	TRINITY_DN998_c0_g1_i12	2	p3	(GAT)5	15	1310	1324
	TRINITY_DN998_c0_g1_i12	3	p3	(TAT)5	15	1535	1549
	TRINITY_DN998_c0_g1_i8	1	p2	(AG)6	12	220	231
	TRINITY_DN998_c0_g1_i8	2	p3	(GAT)5	15	1309	1323
	TRINITY_DN998_c0_g1_i8	3	p3	(TAT)5	15	1534	1548
	TRINITY_DN998_c0_g1_i9	1	p3	(GGA)5	15	289	303
	TRINITY_DN998_c0_g1_i6	1	p2	(AG)6	12	220	231
	TRINITY_DN998_c0_g1_i4	1	p2	(AG)6	12	220	231
	TRINITY_DN998_c0_g1_i2	1	p3	(GGA)5	15	289	303
	TRINITY_DN998_c0_g1_i2	2	p3	(GAT)5	15	1310	1324
	TRINITY_DN977_c0_g1_i8	1	p3	(CGC)6	18	235	252
	TRINITY_DN977_c0_g1_i6	1	p3	(CGC)5	15	238	252
	TRINITY_DN977_c0_g1_i3	1	p3	(CGC)5	15	238	252
	TRINITY_DN977_c0_g1_i2	1	p3	(CGC)6	18	229	246
	TRINITY_DN977_c0_g1_i11	1	p3	(CGC)5	15	238	252
	TRINITY_DN977_c0_g1_i4	1	p3	(CGC)5	15	238	252
	TRINITY_DN977_c0_g1_i9	1	p3	(CGC)6	18	235	252
	TRINITY_DN977_c0_g1_i1	1	p3	(CGC)6	18	238	255
	TRINITY_DN968_c1_g1_i1	1	p2	(AT)6	12	1887	1898
	TRINITY_DN968_c1_g1_i4	1	p2	(AT)6	12	594	605
	TRINITY_DN968_c1_g1_i7	1	p2	(AT)6	12	1382	1393
	TRINITY_DN968_c1_g1_i6	1	p2	(AT)6	12	1887	1898
	TRINITY_DN990_c0_g1_i1	1	p3	(GAT)5	15	2	16
	TRINITY_DN990_c0_g1_i2	1	p3	(GAT)5	15	2	16
	TRINITY_DN942_c0_g2_i1	1	p3	(AAG)5	15	1241	1255
	TRINITY_DN913_c0_g1_i6	1	p3	(CGA)5	15	960	974
	TRINITY_DN913_c0_g1_i2	1	p3	(CGA)5	15	960	974
	TRINITY_DN901_c0_g1_i9	1	p1	(A)11	11	58	68
	TRINITY_DN901_c0_g1_i9	2	p3	(GCA)5	15	305	319
	TRINITY_DN901_c0_g1_i9	3	p3	(TGA)5	15	851	865
	TRINITY_DN901_c0_g1_i10	1	p1	(A)11	11	58	68
	TRINITY_DN901_c0_g1_i10	2	p3	(GCA)5	15	305	319
	TRINITY_DN901_c0_g1_i10	3	p3	(TGA)5	15	851	865
	TRINITY_DN901_c0_g1_i3	1	p3	(GCA)6	18	314	331
	TRINITY_DN901_c0_g1_i3	2	p3	(TGA)5	15	873	887
	TRINITY_DN901_c0_g1_i2	1	p1	(A)11	11	58	68
	TRINITY_DN901_c0_g1_i2	2	p3	(GCA)5	15	305	319
	TRINITY_DN901_c0_g1_i4	1	p3	(GCA)7	21	286	306
	TRINITY_DN901_c0_g1_i4	2	p3	(TGA)5	15	860	874
	TRINITY_DN901_c0_g1_i8	1	p3	(GCA)7	21	286	306
	TRINITY_DN901_c0_g1_i8	2	p3	(TGA)5	15	832	846
	TRINITY_DN901_c0_g1_i11	1	p1	(A)11	11	58	68
	TRINITY_DN901_c0_g1_i11	2	p3	(GCA)5	15	305	319
	TRINITY_DN901_c0_g1_i11	3	p3	(TGA)5	15	879	893
	TRINITY_DN901_c0_g1_i7	1	p3	(GCA)7	21	286	306
	TRINITY_DN901_c0_g1_i7	2	p3	(TGA)5	15	832	846
	TRINITY_DN970_c0_g1_i3	1	p3	(CGC)6	18	157	174
	TRINITY_DN970_c0_g1_i1	1	p3	(CGC)6	18	157	174
	TRINITY_DN970_c0_g1_i1	2	p4	(TGTC)5	20	4147	4166
	TRINITY_DN970_c0_g1_i2	1	p3	(CGC)6	18	157	174
	TRINITY_DN970_c0_g1_i2	2	p4	(TGTC)5	20	4147	4166
	TRINITY_DN936_c0_g1_i10	1	c	(GAC)5(GCT)5	30	613	642
	TRINITY_DN936_c0_g1_i13	1	c	(GAC)5(GCT)5	30	613	642
	TRINITY_DN936_c0_g1_i13	2	p2	(AG)10	20	2967	2986
	TRINITY_DN936_c0_g1_i11	1	c	(GAC)5(GCT)5	30	613	642
	TRINITY_DN936_c0_g1_i11	2	p4	(AGGA)5	20	2980	2999
	TRINITY_DN936_c0_g1_i8	1	p4	(AGGA)5	20	2965	2984
	TRINITY_DN936_c0_g1_i12	1	p2	(AG)10	20	3003	3022
	TRINITY_DN936_c0_g1_i6	1	p2	(AG)10	20	2952	2971
	TRINITY_DN936_c0_g1_i3	1	c	(GAC)5(GCT)5	30	613	642
	TRINITY_DN936_c0_g1_i3	2	p4	(AGGA)5	20	3016	3035
	TRINITY_DN936_c0_g1_i14	1	p4	(AGGA)5	20	3025	3044
	TRINITY_DN936_c0_g1_i4	1	c	(GAC)5(GCT)5	30	613	642
	TRINITY_DN74189_c0_g1_i5	1	p3	(CCA)5	15	935	949
	TRINITY_DN74189_c0_g1_i5	2	p3	(CCA)6	18	1241	1258
	TRINITY_DN74189_c0_g1_i1	1	p3	(CCA)5	15	935	949
	TRINITY_DN74189_c0_g1_i1	2	p3	(CCA)6	18	1238	1255
	TRINITY_DN74189_c0_g1_i4	1	p3	(CCA)5	15	935	949
	TRINITY_DN74189_c0_g1_i4	2	p3	(CCA)6	18	1238	1255
	TRINITY_DN74189_c0_g1_i2	1	p3	(CCA)6	18	1162	1179
	TRINITY_DN74108_c0_g1_i1	1	p3	(AAT)5	15	258	272
	TRINITY_DN74119_c2_g1_i1	1	p3	(GAG)5	15	307	321
	TRINITY_DN74182_c0_g1_i2	1	p2	(CA)6	12	85	96
	TRINITY_DN34753_c0_g1_i4	1	c	(ACG)6actacagcgcccgcgacctcgtcacccccagcttcttctcgcagggtatgctt(G)10aaga(AG)9	103	144	246
	TRINITY_DN34753_c0_g1_i3	1	p3	(ACG)6	18	144	161
	TRINITY_DN34753_c0_g1_i2	1	c	(AG)8aagagagggaaaga(AG)6	42	43	84
	TRINITY_DN34753_c0_g1_i2	2	p3	(ACG)5	15	261	275
	TRINITY_DN34753_c0_g1_i1	1	p3	(ACG)6	18	144	161
	TRINITY_DN34724_c0_g1_i1	1	p3	(CCA)5	15	159	173
	TRINITY_DN34724_c0_g1_i3	1	p3	(CAT)5	15	179	193
	TRINITY_DN34724_c0_g1_i2	1	p3	(CAT)5	15	179	193
	TRINITY_DN34724_c0_g1_i2	2	p2	(GA)11	22	461	482
	TRINITY_DN34784_c0_g1_i2	1	p1	(C)11	11	176	186
	TRINITY_DN34735_c0_g1_i1	1	p2	(AG)7	14	126	139
	TRINITY_DN34757_c0_g1_i2	1	p2	(GC)6	12	175	186
	TRINITY_DN34727_c0_g1_i3	1	p3	(GAC)5	15	158	172
	TRINITY_DN34729_c0_g1_i1	1	p1	(A)11	11	1831	1841
	TRINITY_DN34743_c0_g1_i5	1	p3	(GAC)5	15	1797	1811
	TRINITY_DN34743_c0_g1_i7	1	p3	(CGA)5	15	1799	1813
	TRINITY_DN34743_c0_g1_i1	1	p3	(GAC)5	15	210	224
	TRINITY_DN34743_c0_g1_i8	1	p3	(GAC)5	15	1797	1811
	TRINITY_DN34743_c0_g1_i2	1	p3	(GAC)5	15	1797	1811
	TRINITY_DN34743_c0_g1_i4	1	p3	(GAC)5	15	1797	1811
	TRINITY_DN34780_c0_g1_i5	1	p1	(A)10	10	80	89
	TRINITY_DN34799_c0_g1_i3	1	p2	(GT)23	46	765	810
	TRINITY_DN34799_c0_g1_i4	1	p2	(TG)10	20	34	53
	TRINITY_DN34789_c0_g1_i1	1	p2	(GA)7	14	96	109
	TRINITY_DN34760_c0_g1_i4	1	p1	(T)10	10	161	170
	TRINITY_DN34760_c0_g1_i5	1	p1	(T)10	10	919	928
	TRINITY_DN12301_c0_g1_i2	1	p3	(GAT)5	15	2639	2653
	TRINITY_DN12301_c0_g1_i1	1	p3	(GAT)5	15	182	196
	TRINITY_DN12301_c0_g1_i7	1	p3	(GAT)5	15	2657	2671
	TRINITY_DN12301_c0_g1_i11	1	p3	(GAT)5	15	464	478
	TRINITY_DN12301_c0_g1_i12	1	p3	(GAT)5	15	2657	2671
	TRINITY_DN12301_c0_g1_i14	1	p3	(GAT)5	15	2639	2653
	TRINITY_DN12320_c0_g1_i3	1	c	(A)10gaat(TTG)12	50	403	452
	TRINITY_DN12320_c0_g1_i7	1	c	(A)10gaat(TTG)6	32	1108	1139
	TRINITY_DN12320_c0_g1_i5	1	c	(A)10gaat(TTG)12	50	804	853
	TRINITY_DN12330_c0_g2_i1	1	p3	(AGA)5	15	372	386
	TRINITY_DN12390_c0_g1_i1	1	p3	(CTC)5	15	208	222
	TRINITY_DN12390_c0_g1_i2	1	p3	(CTC)5	15	208	222
	TRINITY_DN12390_c0_g1_i4	1	p3	(CTC)5	15	208	222
	TRINITY_DN12390_c0_g1_i3	1	p3	(CTC)5	15	208	222
	TRINITY_DN12361_c0_g1_i5	1	p1	(T)10	10	2352	2361
	TRINITY_DN12361_c0_g1_i6	1	p1	(T)10	10	2371	2380
	TRINITY_DN12361_c0_g1_i2	1	p1	(T)10	10	2371	2380
	TRINITY_DN12371_c0_g1_i3	1	p3	(CTT)5	15	1222	1236
	TRINITY_DN12371_c0_g1_i2	1	p3	(CTT)6	18	1099	1116
	TRINITY_DN12371_c0_g1_i4	1	p3	(CTT)5	15	1096	1110
	TRINITY_DN12300_c0_g1_i3	1	p2	(CT)17	34	561	594
	TRINITY_DN12300_c0_g1_i6	1	c	(CT)8catcctg(CT)17	57	538	594
	TRINITY_DN12342_c0_g1_i1	1	p3	(GCC)5	15	222	236
	TRINITY_DN12342_c0_g1_i4	1	p3	(GCC)5	15	222	236
	TRINITY_DN12342_c0_g1_i5	1	p3	(GCC)5	15	222	236
	TRINITY_DN12340_c0_g1_i13	1	p3	(GCT)5	15	1617	1631
	TRINITY_DN12306_c0_g1_i6	1	p3	(CTC)7	21	193	213
	TRINITY_DN12306_c0_g1_i4	1	p3	(CTC)7	21	193	213
	TRINITY_DN12306_c0_g1_i3	1	p3	(CTC)7	21	193	213
	TRINITY_DN12306_c0_g1_i2	1	p3	(CCT)5	15	201	215
	TRINITY_DN12355_c0_g1_i1	1	c	(CGC)5c(GGA)6	34	30	63
	TRINITY_DN12355_c0_g1_i2	1	c	(CGC)5c(GGA)6	34	30	63
	TRINITY_DN12387_c0_g1_i1	1	p3	(CGC)5	15	74	88
	TRINITY_DN12387_c0_g1_i4	1	p3	(CGC)5	15	74	88
	TRINITY_DN12344_c0_g1_i1	1	p3	(CCG)7	21	188	208
	TRINITY_DN12344_c0_g2_i1	1	p3	(CCG)5	15	97	111
	TRINITY_DN12329_c0_g2_i2	1	p4	(CTTT)11	44	1895	1938
	TRINITY_DN12329_c0_g2_i4	1	p4	(CTTT)11	44	1498	1541
	TRINITY_DN12329_c0_g3_i1	1	p4	(TCTT)6	24	812	835
	TRINITY_DN12357_c0_g1_i3	1	p3	(CAC)7	21	366	386
	TRINITY_DN12357_c0_g1_i4	1	p3	(CAC)5	15	366	380
	TRINITY_DN12349_c0_g1_i2	1	p3	(GAG)5	15	243	257
	TRINITY_DN12349_c0_g1_i2	2	p3	(CAG)5	15	444	458
	TRINITY_DN12349_c0_g1_i8	1	p3	(GAG)5	15	243	257
	TRINITY_DN12349_c0_g1_i8	2	p3	(CAG)5	15	444	458
	TRINITY_DN12349_c0_g1_i10	1	p3	(GAG)6	18	243	260
	TRINITY_DN12349_c0_g1_i10	2	p3	(CAG)5	15	447	461
	TRINITY_DN12349_c0_g1_i5	1	p3	(GAG)5	15	243	257
	TRINITY_DN12349_c0_g1_i5	2	p3	(CAG)5	15	444	458
	TRINITY_DN12325_c0_g1_i4	1	p3	(CTG)8	24	7342	7365
	TRINITY_DN12325_c0_g1_i6	1	p3	(CTG)8	24	7321	7344
	TRINITY_DN12324_c0_g1_i3	1	p2	(GC)6	12	219	230
	TRINITY_DN12324_c0_g1_i2	1	p2	(GC)6	12	219	230
	TRINITY_DN12324_c0_g1_i5	1	p2	(GC)6	12	181	192
	TRINITY_DN12341_c0_g3_i2	1	p3	(AGG)6	18	130	147
	TRINITY_DN12305_c0_g1_i1	1	p1	(A)11	11	1020	1030
	TRINITY_DN12358_c0_g1_i6	1	p2	(AC)7	14	16	29
	TRINITY_DN12358_c0_g1_i10	1	p2	(AC)7	14	16	29
	TRINITY_DN12358_c0_g1_i8	1	p1	(T)10	10	730	739
	TRINITY_DN12358_c0_g1_i7	1	p2	(AC)7	14	16	29
	TRINITY_DN12318_c0_g1_i9	1	p2	(CG)6	12	264	275
	TRINITY_DN12319_c0_g1_i5	1	p2	(GT)6	12	283	294
	TRINITY_DN12319_c0_g1_i2	1	p2	(GT)6	12	283	294
	TRINITY_DN12311_c0_g1_i1	1	p3	(CTC)6	18	97	114
	TRINITY_DN12311_c0_g1_i6	1	p3	(CTC)6	18	97	114
	TRINITY_DN12393_c0_g1_i2	1	p3	(CTT)5	15	680	694
	TRINITY_DN12397_c0_g1_i18	1	c	(TG)9tatat(AC)12	47	17	63
	TRINITY_DN12397_c0_g1_i4	1	p1	(A)10	10	54	63
	TRINITY_DN12397_c0_g1_i7	1	p1	(T)10	10	290	299
	TRINITY_DN12397_c0_g1_i21	1	p2	(AC)12	24	40	63
	TRINITY_DN12397_c0_g1_i19	1	p2	(AC)12	24	40	63
	TRINITY_DN12397_c0_g1_i19	2	p1	(T)10	10	290	299
	TRINITY_DN12397_c0_g1_i8	1	p1	(T)10	10	290	299
	TRINITY_DN12397_c0_g1_i14	1	p2	(CA)10	20	45	64
	TRINITY_DN12397_c0_g1_i14	2	p1	(T)10	10	290	299
	TRINITY_DN12397_c0_g1_i16	1	p1	(T)10	10	290	299
	TRINITY_DN12397_c0_g1_i3	1	p1	(T)10	10	290	299
	TRINITY_DN12321_c0_g1_i2	1	c	(CA)9(GA)15	48	28	75
	TRINITY_DN12379_c1_g2_i2	1	p1	(A)10	10	826	835
	TRINITY_DN12328_c0_g2_i1	1	p3	(GAC)5	15	455	469
	TRINITY_DN12396_c0_g1_i1	1	p3	(CCT)6	18	217	234
	TRINITY_DN12396_c0_g1_i5	1	p3	(CCT)6	18	217	234
	TRINITY_DN12396_c0_g1_i4	1	p3	(CCT)6	18	217	234
	TRINITY_DN12396_c0_g1_i3	1	p3	(CCT)6	18	217	234
	TRINITY_DN12347_c0_g2_i2	1	p3	(GCC)6	18	789	806
	TRINITY_DN12347_c0_g2_i4	1	c	(CGC)5cgacaacgtcttctcccgcttcctggccgaccaccagatccgagacaccaa(GCC)6	84	718	801
	TRINITY_DN12347_c0_g2_i1	1	p2	(TC)6	12	212	223
	TRINITY_DN12347_c0_g2_i1	2	p3	(GCC)6	18	764	781
	TRINITY_DN12347_c0_g2_i5	1	p3	(GCC)6	18	782	799
	TRINITY_DN12347_c0_g2_i3	1	c	(GCC)6cgtcgcccccggggcccacttccctgatgactccgccatggcatc(GCA)6	81	783	863
	TRINITY_DN12370_c0_g1_i2	1	p3	(GTC)6	18	163	180
	TRINITY_DN33406_c0_g1_i2	1	p1	(T)11	11	377	387
	TRINITY_DN33406_c0_g1_i1	1	p1	(T)11	11	377	387
	TRINITY_DN33478_c0_g1_i1	1	p3	(CCT)6	18	545	562
	TRINITY_DN33478_c0_g1_i2	1	p2	(TC)7	14	378	391
	TRINITY_DN33478_c0_g1_i2	2	p3	(CCT)6	18	545	562
	TRINITY_DN33478_c1_g1_i1	1	p2	(GA)8	16	162	177
	TRINITY_DN33490_c0_g3_i1	1	p2	(GA)9	18	258	275
	TRINITY_DN33490_c0_g3_i3	1	p2	(GA)9	18	258	275
	TRINITY_DN33486_c0_g1_i3	1	p3	(CTC)7	21	392	412
	TRINITY_DN33486_c1_g1_i11	1	p4	(GCTC)5	20	48	67
	TRINITY_DN33486_c1_g1_i5	1	p3	(CCT)6	18	336	353
	TRINITY_DN33462_c0_g2_i1	1	p3	(AGC)5	15	229	243
	TRINITY_DN33401_c0_g1_i2	1	p3	(GCG)5	15	137	151
	TRINITY_DN33497_c0_g1_i1	1	p3	(TCC)5	15	94	108
	TRINITY_DN33483_c1_g1_i3	1	p2	(TC)7	14	682	695
	TRINITY_DN33483_c1_g1_i1	1	p2	(TC)7	14	682	695
	TRINITY_DN33447_c0_g1_i1	1	p1	(A)12	12	494	505
	TRINITY_DN33447_c1_g1_i1	1	p2	(AC)6	12	281	292
	TRINITY_DN33400_c0_g1_i1	1	p4	(GCTT)5	20	811	830
	TRINITY_DN33400_c0_g3_i1	1	p4	(TGCT)5	20	146	165
	TRINITY_DN33400_c0_g3_i1	2	p4	(GCTT)5	20	435	454
	TRINITY_DN33487_c1_g1_i2	1	p1	(T)10	10	816	825
	TRINITY_DN33403_c0_g1_i2	1	p3	(GCG)6	18	148	165
	TRINITY_DN33422_c0_g1_i2	1	p3	(GAT)7	21	25	45
	TRINITY_DN33499_c0_g2_i1	1	p3	(GCC)6	18	434	451
	TRINITY_DN33454_c0_g2_i1	1	p3	(CGC)5	15	334	348
	TRINITY_DN41388_c2_g3_i1	1	p1	(T)10	10	136	145
	TRINITY_DN41319_c0_g1_i1	1	p1	(T)13	13	410	422
	TRINITY_DN41365_c0_g1_i2	1	p3	(TTC)5	15	90	104
	TRINITY_DN41365_c0_g1_i4	1	p3	(CTC)5	15	104	118
	TRINITY_DN41301_c0_g1_i2	1	p3	(GCA)6	18	672	689
	TRINITY_DN41379_c0_g1_i2	1	p3	(GCT)5	15	1599	1613
	TRINITY_DN41379_c0_g1_i4	1	p3	(TGC)6	18	1547	1564
	TRINITY_DN41379_c0_g1_i1	1	p3	(GCT)5	15	1572	1586
	TRINITY_DN41329_c1_g1_i1	1	p3	(CGA)5	15	1521	1535
	TRINITY_DN41329_c1_g1_i2	1	p3	(CGA)5	15	580	594
	TRINITY_DN41329_c1_g1_i3	1	p3	(CGA)5	15	1521	1535
	TRINITY_DN41321_c0_g1_i2	1	p3	(CAC)5	15	972	986
	TRINITY_DN41321_c0_g1_i3	1	p3	(CAC)5	15	972	986
	TRINITY_DN41321_c0_g1_i1	1	p3	(CAC)5	15	972	986
	TRINITY_DN41307_c0_g2_i1	1	p3	(AGC)5	15	45	59
	TRINITY_DN41307_c0_g2_i2	1	p3	(AGC)5	15	45	59
	TRINITY_DN41364_c1_g1_i2	1	p2	(TC)18	36	460	495
	TRINITY_DN41376_c0_g2_i1	1	p1	(T)10	10	271	280
	TRINITY_DN41376_c2_g1_i2	1	p2	(CT)8	16	858	873
	TRINITY_DN41376_c2_g1_i6	1	p2	(CT)8	16	858	873
	TRINITY_DN41361_c0_g2_i3	1	p3	(CTC)5	15	810	824
	TRINITY_DN41316_c0_g1_i6	1	p3	(CGC)6	18	36	53
	TRINITY_DN41338_c0_g1_i4	1	p3	(GGC)6	18	1467	1484
	TRINITY_DN41383_c0_g1_i4	1	p2	(CT)23	46	1308	1353
	TRINITY_DN41336_c1_g1_i1	1	p3	(GAG)6	18	1228	1245
	TRINITY_DN41336_c1_g1_i2	1	p3	(GAG)6	18	1477	1494
	TRINITY_DN41350_c0_g3_i1	1	p2	(TG)7	14	826	839
	TRINITY_DN51024_c0_g1_i8	1	c	(CCT)5ccatctgccccccttcctcgcgaccgcttctctcgcggcctccac(CT)9	78	180	257
	TRINITY_DN51029_c0_g1_i2	1	p2	(CG)6	12	105	116
	TRINITY_DN51092_c2_g1_i1	1	p2	(TC)6	12	902	913
	TRINITY_DN51013_c0_g1_i2	1	c	(TGA)5tgccaatggcaacaatcctcaaggtgctggtggcaacaatgccaatgtcaacaatccacacggagctgaa(GAT)6agtgatgatgatgaggatgatgatgataacgataaggatgatggtgatgaca(ATG)6	173	886	1058
	TRINITY_DN51004_c0_g1_i1	1	p3	(CGC)5	15	269	283
	TRINITY_DN11942_c0_g1_i1	1	p2	(TG)7	14	223	236
	TRINITY_DN11996_c0_g1_i2	1	p1	(A)10	10	1993	2002
	TRINITY_DN11996_c0_g1_i10	1	p1	(A)10	10	1992	2001
	TRINITY_DN11996_c0_g1_i7	1	p1	(A)10	10	1975	1984
	TRINITY_DN11996_c0_g1_i11	1	p1	(A)10	10	1974	1983
	TRINITY_DN11996_c0_g1_i8	1	p1	(A)10	10	1974	1983
	TRINITY_DN11996_c0_g1_i9	1	p3	(GGC)5	15	75	89
	TRINITY_DN11996_c0_g1_i9	2	p1	(A)10	10	1769	1778
	TRINITY_DN11996_c0_g1_i4	1	p3	(GGC)5	15	75	89
	TRINITY_DN11996_c0_g1_i6	1	p3	(GGC)5	15	75	89
	TRINITY_DN11996_c0_g1_i3	1	p1	(A)10	10	1993	2002
	TRINITY_DN11906_c0_g1_i5	1	p3	(CGA)5	15	95	109
	TRINITY_DN11906_c0_g1_i3	1	p3	(CGA)5	15	95	109
	TRINITY_DN11906_c0_g1_i2	1	p3	(CCT)5	15	81	95
	TRINITY_DN11934_c0_g1_i6	1	p1	(T)10	10	783	792
	TRINITY_DN11934_c0_g1_i10	1	p3	(GCC)6	18	69	86
	TRINITY_DN11934_c0_g1_i4	1	p1	(T)10	10	631	640
	TRINITY_DN11902_c0_g1_i7	1	p2	(CT)8	16	24	39
	TRINITY_DN11995_c0_g1_i7	1	p3	(CAG)7	21	701	721
	TRINITY_DN11995_c0_g1_i6	1	p3	(CAG)5	15	429	443
	TRINITY_DN11981_c0_g1_i6	1	p3	(CCA)5	15	120	134
	TRINITY_DN11981_c0_g1_i4	1	p3	(CCA)5	15	120	134
	TRINITY_DN11981_c0_g1_i10	1	p3	(CCA)5	15	120	134
	TRINITY_DN11951_c0_g1_i6	1	p2	(TA)6	12	408	419
	TRINITY_DN11951_c0_g1_i8	1	p2	(TA)6	12	861	872
	TRINITY_DN11951_c0_g1_i9	1	p2	(TA)6	12	306	317
	TRINITY_DN11951_c0_g1_i2	1	p2	(TA)6	12	814	825
	TRINITY_DN11904_c0_g1_i6	1	p3	(GGC)5	15	516	530
	TRINITY_DN11904_c0_g1_i1	1	p3	(GGC)5	15	410	424
	TRINITY_DN11904_c0_g1_i5	1	p3	(GGC)5	15	410	424
	TRINITY_DN11960_c1_g1_i4	1	p2	(CG)6	12	216	227
	TRINITY_DN11960_c1_g1_i1	1	p2	(CG)6	12	216	227
	TRINITY_DN11990_c0_g1_i7	1	p3	(GCT)6	18	453	470
	TRINITY_DN11990_c0_g1_i7	2	p3	(CGC)5	15	910	924
	TRINITY_DN11990_c0_g1_i2	1	p3	(GCT)6	18	453	470
	TRINITY_DN11990_c0_g1_i1	1	p3	(GCT)6	18	453	470
	TRINITY_DN11990_c0_g1_i3	1	p3	(GCT)7	21	453	473
	TRINITY_DN11990_c0_g1_i4	1	p3	(GCT)7	21	453	473
	TRINITY_DN11990_c0_g1_i9	1	p3	(GCT)5	15	454	468
	TRINITY_DN11999_c0_g1_i4	1	p3	(AAG)5	15	264	278
	TRINITY_DN11999_c0_g1_i6	1	p3	(AAG)5	15	264	278
	TRINITY_DN11912_c0_g1_i4	1	p3	(TCC)6	18	191	208
	TRINITY_DN11912_c0_g1_i3	1	p3	(TCC)6	18	191	208
	TRINITY_DN11992_c1_g1_i4	1	p1	(T)11	11	1336	1346
	TRINITY_DN11992_c1_g1_i13	1	p1	(T)11	11	1102	1112
	TRINITY_DN11918_c2_g2_i1	1	p3	(CCA)6	18	147	164
	TRINITY_DN11966_c0_g1_i10	1	p2	(GT)6	12	618	629
	TRINITY_DN11966_c0_g1_i4	1	p2	(GT)6	12	599	610
	TRINITY_DN11907_c0_g1_i1	1	p3	(GAC)5	15	1171	1185
	TRINITY_DN11907_c0_g1_i2	1	p3	(GAT)5	15	1174	1188
	TRINITY_DN11907_c0_g1_i3	1	p3	(GAT)5	15	160	174
	TRINITY_DN11910_c0_g1_i24	1	p1	(C)13	13	1939	1951
	TRINITY_DN11970_c0_g1_i8	1	p3	(CAC)7	21	85	105
	TRINITY_DN11976_c1_g1_i6	1	p3	(CAG)6	18	1748	1765
	TRINITY_DN11976_c1_g1_i1	1	p3	(CAG)6	18	1921	1938
	TRINITY_DN11963_c0_g1_i10	1	p2	(CG)7	14	14	27
	TRINITY_DN11987_c0_g1_i4	1	p2	(AG)6	12	40	51
	TRINITY_DN11940_c0_g2_i2	1	p3	(CGG)6	18	417	434
	TRINITY_DN11954_c0_g1_i1	1	p2	(AG)7	14	152	165
	TRINITY_DN11954_c0_g1_i7	1	p2	(AG)7	14	152	165
	TRINITY_DN11954_c0_g1_i7	2	p2	(CG)6	12	432	443
	TRINITY_DN11954_c0_g1_i3	1	p3	(CTT)8	24	141	164
	TRINITY_DN11954_c0_g1_i5	1	p3	(CTT)8	24	141	164
	TRINITY_DN11954_c0_g1_i2	1	p2	(AG)7	14	152	165
	TRINITY_DN11954_c0_g1_i2	2	p2	(CG)6	12	432	443
	TRINITY_DN11911_c0_g1_i10	1	p1	(T)10	10	1892	1901
	TRINITY_DN11911_c0_g1_i14	1	p1	(T)10	10	1918	1927
	TRINITY_DN11911_c0_g1_i13	1	p1	(T)10	10	1904	1913
	TRINITY_DN11911_c0_g1_i4	1	p1	(T)10	10	1919	1928
	TRINITY_DN75009_c0_g1_i3	1	p3	(ATG)6	18	504	521
	TRINITY_DN75009_c0_g1_i1	1	p3	(ATG)6	18	429	446
	TRINITY_DN75009_c0_g1_i2	1	p3	(ATG)6	18	504	521
	TRINITY_DN75017_c0_g1_i4	1	p2	(TC)8	16	146	161
	TRINITY_DN75026_c0_g1_i1	1	p2	(TC)6	12	399	410
	TRINITY_DN75054_c0_g1_i5	1	p3	(GAG)5	15	168	182
	TRINITY_DN75053_c0_g1_i1	1	p2	(AG)17	34	169	202
	TRINITY_DN10299_c0_g1_i1	1	p1	(A)11	11	751	761
	TRINITY_DN10200_c0_g1_i4	1	p3	(CCT)6	18	173	190
	TRINITY_DN10200_c0_g1_i5	1	p3	(CCT)6	18	187	204
	TRINITY_DN10267_c0_g1_i4	1	p3	(GCC)6	18	252	269
	TRINITY_DN10250_c0_g1_i9	1	p2	(TG)23	46	860	905
	TRINITY_DN10250_c0_g1_i5	1	p2	(TG)10	20	860	879
	TRINITY_DN10250_c0_g1_i10	1	p3	(CGC)5	15	242	256
	TRINITY_DN10250_c0_g1_i8	1	p2	(TG)11	22	836	857
	TRINITY_DN10250_c0_g1_i1	1	p3	(CGC)5	15	242	256
	TRINITY_DN10250_c0_g2_i3	1	p2	(TG)9	18	701	718
	TRINITY_DN10250_c0_g2_i2	1	p2	(GT)12	24	537	560
	TRINITY_DN10250_c0_g2_i1	1	p2	(TG)9	18	701	718
	TRINITY_DN10250_c2_g1_i1	1	p2	(CA)11	22	45	66
	TRINITY_DN10261_c0_g2_i1	1	p1	(A)10	10	199	208
	TRINITY_DN10229_c0_g1_i5	1	p3	(CGC)5	15	270	284
	TRINITY_DN10281_c0_g1_i2	1	p3	(CGG)6	18	39	56
	TRINITY_DN10281_c0_g1_i3	1	p1	(T)10	10	898	907
	TRINITY_DN10281_c1_g1_i4	1	p3	(CGG)8	24	87	110
	TRINITY_DN10281_c1_g1_i2	1	p3	(CGG)8	24	87	110
	TRINITY_DN10281_c1_g1_i6	1	p3	(CGG)8	24	87	110
	TRINITY_DN10281_c1_g1_i7	1	p3	(GGC)7	21	5	25
	TRINITY_DN10281_c1_g1_i1	1	p3	(CGG)8	24	87	110
	TRINITY_DN10281_c2_g1_i1	1	p3	(GCG)7	21	581	601
	TRINITY_DN10269_c0_g1_i5	1	p1	(A)11	11	1140	1150
	TRINITY_DN10269_c0_g1_i8	1	p1	(T)10	10	2963	2972
	TRINITY_DN10269_c0_g1_i12	1	p1	(A)11	11	1034	1044
	TRINITY_DN10269_c0_g1_i12	2	p1	(T)10	10	2857	2866
	TRINITY_DN10269_c0_g1_i10	1	p1	(A)11	11	1140	1150
	TRINITY_DN10269_c0_g1_i10	2	p1	(T)10	10	2963	2972
	TRINITY_DN10269_c0_g1_i16	1	p1	(A)11	11	1034	1044
	TRINITY_DN10269_c0_g1_i16	2	p1	(T)10	10	2857	2866
	TRINITY_DN10269_c0_g1_i13	1	p1	(A)11	11	1140	1150
	TRINITY_DN10262_c0_g1_i1	1	p2	(GA)8	16	47	62
	TRINITY_DN10262_c0_g1_i4	1	p2	(GA)8	16	47	62
	TRINITY_DN10262_c0_g1_i5	1	p2	(GA)8	16	47	62
	TRINITY_DN10223_c0_g1_i3	1	p3	(ACT)5	15	1222	1236
	TRINITY_DN10223_c0_g1_i2	1	p3	(ACT)5	15	1222	1236
	TRINITY_DN10223_c0_g1_i7	1	p3	(ACT)5	15	1222	1236
	TRINITY_DN10223_c0_g1_i11	1	p3	(ACT)5	15	1253	1267
	TRINITY_DN10223_c0_g1_i1	1	p3	(ACT)5	15	815	829
	TRINITY_DN10223_c0_g1_i5	1	p3	(ACT)5	15	1222	1236
	TRINITY_DN10223_c0_g1_i6	1	p3	(ACT)5	15	1253	1267
	TRINITY_DN10223_c0_g1_i9	1	p3	(ACT)5	15	1210	1224
	TRINITY_DN10257_c0_g1_i5	1	p2	(TC)6	12	35	46
	TRINITY_DN10257_c0_g1_i5	2	p3	(CGC)5	15	228	242
	TRINITY_DN10257_c0_g1_i6	1	p2	(TC)6	12	35	46
	TRINITY_DN10257_c0_g1_i6	2	p3	(CGC)5	15	228	242
	TRINITY_DN10257_c0_g1_i10	1	p2	(TC)6	12	35	46
	TRINITY_DN10257_c0_g1_i10	2	p3	(CGC)5	15	228	242
	TRINITY_DN10217_c0_g1_i2	1	p3	(GCC)5	15	409	423
	TRINITY_DN10217_c0_g1_i3	1	p3	(GCC)5	15	412	426
	TRINITY_DN10217_c0_g1_i5	1	p3	(CGC)5	15	218	232
	TRINITY_DN10273_c0_g1_i1	1	p3	(CTC)5	15	186	200
	TRINITY_DN10268_c0_g1_i9	1	p2	(TG)6	12	1580	1591
	TRINITY_DN10268_c0_g1_i9	2	p2	(GC)6	12	1705	1716
	TRINITY_DN10268_c0_g1_i2	1	p2	(TG)6	12	1526	1537
	TRINITY_DN10268_c0_g1_i1	1	p2	(TG)6	12	1575	1586
	TRINITY_DN10268_c0_g1_i1	2	p2	(GC)6	12	1700	1711
	TRINITY_DN10268_c0_g1_i7	1	p2	(TG)6	12	1580	1591
	TRINITY_DN10268_c0_g1_i10	1	p2	(TG)6	12	1575	1586
	TRINITY_DN10268_c0_g1_i3	1	p2	(TG)6	12	117	128
	TRINITY_DN10268_c0_g1_i4	1	p2	(TG)6	12	1521	1532
	TRINITY_DN10206_c0_g1_i2	1	p3	(CAC)7	21	251	271
	TRINITY_DN10206_c0_g1_i6	1	p3	(CAC)7	21	251	271
	TRINITY_DN10206_c0_g1_i1	1	p3	(CAC)7	21	101	121
	TRINITY_DN10206_c0_g1_i4	1	c	(CT)6aaccacccactctcgtcagtcatcacccccaccacaaccccatgctctccaccatttccatcgacagttactg(CT)6	97	18	114
	TRINITY_DN10206_c0_g1_i4	2	p3	(CAC)7	21	263	283
	TRINITY_DN10206_c0_g1_i5	1	c	(CT)6aaccacccactctcgtcagtcatcacccccaccacaaccccatgctctccaccatttccatcgacagttactg(CT)6	97	18	114
	TRINITY_DN10206_c0_g1_i5	2	p3	(CAC)7	21	263	283
	TRINITY_DN10206_c0_g1_i3	1	p3	(CAC)7	21	101	121
	TRINITY_DN10206_c1_g1_i1	1	p3	(CAG)5	15	489	503
	TRINITY_DN10206_c1_g1_i2	1	p3	(CAG)5	15	445	459
	TRINITY_DN10209_c0_g1_i1	1	p3	(AGG)5	15	409	423
	TRINITY_DN10209_c0_g1_i5	1	p3	(AGG)5	15	409	423
	TRINITY_DN10292_c0_g1_i1	1	p3	(CCG)5	15	3566	3580
	TRINITY_DN10292_c0_g1_i8	1	p3	(CCG)5	15	2715	2729
	TRINITY_DN10292_c0_g1_i9	1	p3	(CCG)5	15	3081	3095
	TRINITY_DN10292_c0_g1_i6	1	p3	(CCG)5	15	3315	3329
	TRINITY_DN10292_c0_g1_i5	1	p3	(CCG)5	15	1517	1531
	TRINITY_DN10292_c0_g1_i3	1	p3	(CCG)5	15	3451	3465
	TRINITY_DN10292_c0_g1_i10	1	p3	(CCG)5	15	2966	2980
	TRINITY_DN10292_c0_g1_i2	1	p3	(CCG)5	15	2002	2016
	TRINITY_DN10292_c0_g1_i7	1	p3	(CCG)5	15	3200	3214
	TRINITY_DN10294_c0_g1_i4	1	p3	(GGA)6	18	36	53
	TRINITY_DN10294_c0_g1_i1	1	p3	(GGA)6	18	36	53
	TRINITY_DN10294_c0_g1_i14	1	p3	(GGA)6	18	36	53
	TRINITY_DN10294_c0_g1_i6	1	p3	(GGA)6	18	36	53
	TRINITY_DN10294_c0_g1_i5	1	p3	(GGA)6	18	36	53
	TRINITY_DN10294_c0_g1_i7	1	p3	(GGA)6	18	36	53
	TRINITY_DN10277_c0_g1_i3	1	p1	(A)13	13	759	771
	TRINITY_DN10277_c0_g1_i1	1	p1	(A)11	11	752	762
	TRINITY_DN10235_c0_g2_i1	1	p1	(T)10	10	935	944
	TRINITY_DN10295_c0_g1_i9	1	p1	(T)10	10	205	214
	TRINITY_DN10295_c0_g1_i5	1	p1	(T)10	10	205	214
	TRINITY_DN10233_c0_g1_i4	1	p1	(T)11	11	2039	2049
	TRINITY_DN10233_c0_g1_i2	1	p1	(T)11	11	2033	2043
	TRINITY_DN10233_c0_g1_i3	1	p1	(T)11	11	3539	3549
	TRINITY_DN10225_c0_g1_i1	1	p3	(TGC)6	18	115	132
	TRINITY_DN10220_c0_g1_i1	1	p3	(CAG)7	21	2462	2482
	TRINITY_DN10220_c0_g1_i6	1	p3	(CAG)7	21	2477	2497
	TRINITY_DN10220_c0_g1_i3	1	p3	(CAG)7	21	2462	2482
	TRINITY_DN10266_c0_g1_i5	1	p1	(T)10	10	1003	1012
	TRINITY_DN10249_c0_g2_i2	1	p2	(AG)8	16	786	801
	TRINITY_DN10249_c0_g2_i1	1	p2	(AG)8	16	786	801
	TRINITY_DN10249_c1_g1_i2	1	p2	(AG)8	16	522	537
	TRINITY_DN10224_c0_g1_i2	1	p2	(TC)7	14	141	154
	TRINITY_DN10224_c0_g1_i5	1	p2	(TC)7	14	141	154
	TRINITY_DN10224_c0_g1_i1	1	p2	(TC)7	14	141	154
	TRINITY_DN10224_c0_g1_i3	1	p2	(TC)7	14	141	154
	TRINITY_DN10224_c0_g1_i4	1	p2	(TC)7	14	141	154
	TRINITY_DN10224_c0_g2_i6	1	p3	(TCC)5	15	34	48
	TRINITY_DN10212_c0_g1_i2	1	p3	(GGC)5	15	913	927
	TRINITY_DN10212_c0_g1_i3	1	p3	(GGC)5	15	636	650
	TRINITY_DN10212_c0_g1_i1	1	p3	(GGC)5	15	913	927
	TRINITY_DN10212_c0_g1_i5	1	p3	(GCG)5	15	484	498
	TRINITY_DN10212_c0_g1_i5	2	p3	(GGC)5	15	919	933
	TRINITY_DN10212_c0_g1_i4	1	p3	(GCG)5	15	490	504
	TRINITY_DN10212_c0_g1_i4	2	p3	(GGC)5	15	925	939
	TRINITY_DN10212_c1_g1_i2	1	c	(GCG)7gggnnnnnnnnnnnnnnnnnnaagaaacgatccgacgatgcggacgaggagtacctcccgtccgacgggggcggcggcgaggaa(GAG)5	120	140	259
	TRINITY_DN10212_c1_g1_i4	1	c	(GCG)7gggggggccaagagaaaacagaagaaacgatccgacgatgcggacgaggagtacctcccgtccgacgggggcggcggcgaggaa(GAG)5	120	188	307
	TRINITY_DN10212_c1_g1_i1	1	p3	(GAG)5	15	300	314
	TRINITY_DN10212_c1_g1_i5	1	p3	(GAG)5	15	300	314
	TRINITY_DN10252_c0_g1_i10	1	p3	(CGG)6	18	189	206
	TRINITY_DN10252_c0_g1_i8	1	p3	(CGG)6	18	189	206
	TRINITY_DN10252_c0_g1_i1	1	p3	(CGG)6	18	189	206
	TRINITY_DN10252_c0_g1_i6	1	p3	(CGG)6	18	189	206
	TRINITY_DN10252_c0_g1_i6	2	p1	(T)10	10	2232	2241
	TRINITY_DN10252_c0_g1_i4	1	p3	(CGG)6	18	189	206
	TRINITY_DN10252_c0_g1_i4	2	p1	(T)10	10	2221	2230
	TRINITY_DN10252_c0_g1_i7	1	p3	(CGG)6	18	189	206
	TRINITY_DN10252_c0_g1_i5	1	p3	(CGG)6	18	189	206
	TRINITY_DN10252_c0_g1_i2	1	p3	(CGG)6	18	189	206
	TRINITY_DN10252_c0_g1_i3	1	p3	(CGG)6	18	189	206
	TRINITY_DN10237_c0_g2_i3	1	p1	(A)10	10	3369	3378
	TRINITY_DN10237_c1_g1_i3	1	p3	(GGC)6	18	58	75
	TRINITY_DN10237_c1_g1_i2	1	p3	(GGC)6	18	58	75
	TRINITY_DN10237_c1_g1_i1	1	p3	(GGC)5	15	66	80
	TRINITY_DN10296_c0_g1_i2	1	p3	(GCC)5	15	56	70
	TRINITY_DN10242_c1_g1_i1	1	p2	(GA)10	20	27	46
	TRINITY_DN10242_c1_g1_i2	1	p2	(GA)10	20	27	46
	TRINITY_DN10242_c1_g1_i5	1	p2	(GA)10	20	27	46
	TRINITY_DN10242_c1_g1_i4	1	p2	(GA)10	20	27	46
	TRINITY_DN10260_c0_g2_i1	1	p3	(CGG)5	15	72	86
	TRINITY_DN10260_c1_g1_i5	1	p3	(CGA)5	15	45	59
	TRINITY_DN10219_c0_g1_i4	1	p3	(CGC)5	15	233	247
	TRINITY_DN10219_c0_g1_i11	1	p3	(CGC)5	15	233	247
	TRINITY_DN10219_c0_g1_i3	1	p3	(CGC)5	15	233	247
	TRINITY_DN10246_c0_g1_i2	1	p3	(GCC)5	15	252	266
	TRINITY_DN10246_c0_g1_i10	1	p3	(GCC)5	15	252	266
	TRINITY_DN10246_c0_g1_i11	1	p3	(GCC)5	15	252	266
	TRINITY_DN10246_c0_g1_i5	1	p3	(GCC)5	15	252	266
	TRINITY_DN10246_c0_g1_i7	1	p3	(GCC)5	15	252	266
	TRINITY_DN10246_c0_g1_i4	1	p3	(GCC)5	15	252	266
	TRINITY_DN10279_c0_g1_i2	1	p3	(CTC)5	15	35	49
	TRINITY_DN10279_c0_g1_i1	1	p3	(CTC)5	15	35	49
	TRINITY_DN10274_c0_g1_i6	1	p1	(G)10	10	733	742
	TRINITY_DN10274_c0_g3_i1	1	p1	(G)11	11	31	41
	TRINITY_DN10274_c2_g1_i1	1	p1	(A)13	13	208	220
	TRINITY_DN10276_c2_g1_i2	1	p2	(AC)7	14	580	593
	TRINITY_DN38668_c0_g1_i1	1	p2	(GT)6	12	659	670
	TRINITY_DN38668_c0_g1_i2	1	p2	(GT)6	12	659	670
	TRINITY_DN38686_c0_g1_i2	1	p3	(TAG)6	18	1195	1212
	TRINITY_DN38602_c0_g1_i2	1	p2	(CA)6	12	68	79
	TRINITY_DN38640_c0_g1_i1	1	p3	(CCT)7	21	108	128
	TRINITY_DN38632_c0_g2_i1	1	p1	(T)10	10	426	435
	TRINITY_DN38645_c0_g1_i1	1	p1	(A)10	10	90	99
	TRINITY_DN38658_c1_g1_i1	1	p3	(CGC)5	15	138	152
	TRINITY_DN38611_c0_g5_i1	1	p1	(T)11	11	813	823
	TRINITY_DN38663_c0_g1_i5	1	p3	(GCG)5	15	348	362
	TRINITY_DN38664_c0_g1_i3	1	p2	(CT)15	30	45	74
	TRINITY_DN38694_c1_g1_i5	1	p1	(T)10	10	2219	2228
	TRINITY_DN38693_c0_g1_i6	1	p2	(TA)6	12	350	361
	TRINITY_DN38693_c0_g1_i14	1	p2	(TA)6	12	261	272
	TRINITY_DN38671_c0_g3_i1	1	p3	(TGC)5	15	22	36
	TRINITY_DN38607_c0_g1_i2	1	p4	(CTCC)5	20	298	317
	TRINITY_DN38665_c0_g2_i1	1	p1	(A)10	10	502	511
	TRINITY_DN38665_c0_g3_i1	1	p1	(A)11	11	2896	2906
	TRINITY_DN38665_c0_g4_i1	1	p1	(A)11	11	1673	1683
	TRINITY_DN46430_c0_g1_i4	1	p3	(GAG)5	15	749	763
	TRINITY_DN46430_c0_g1_i4	2	p3	(TGT)5	15	1019	1033
	TRINITY_DN46430_c0_g1_i3	1	p3	(TGT)5	15	961	975
	TRINITY_DN46430_c0_g1_i2	1	p3	(GAG)5	15	749	763
	TRINITY_DN46417_c0_g1_i7	1	p1	(A)17	17	718	734
	TRINITY_DN46417_c0_g1_i6	1	p1	(A)17	17	630	646
	TRINITY_DN46417_c0_g1_i1	1	p1	(A)17	17	621	637
	TRINITY_DN46461_c1_g1_i1	1	p2	(TC)7	14	5	18
	TRINITY_DN46429_c1_g1_i1	1	p1	(A)10	10	593	602
	TRINITY_DN46498_c0_g1_i1	1	p4	(CCTG)5	20	144	163
	TRINITY_DN46443_c0_g1_i4	1	p3	(GCG)5	15	133	147
	TRINITY_DN46443_c0_g1_i11	1	p3	(GCG)5	15	133	147
	TRINITY_DN24230_c0_g1_i2	1	p1	(G)12	12	314	325
	TRINITY_DN24267_c0_g3_i1	1	p3	(GAA)5	15	615	629
	TRINITY_DN24267_c0_g3_i2	1	p3	(GAA)5	15	1232	1246
	TRINITY_DN24267_c0_g3_i4	1	p2	(AG)6	12	146	157
	TRINITY_DN24267_c0_g3_i4	2	p3	(GAA)5	15	623	637
	TRINITY_DN24267_c1_g1_i2	1	p1	(A)10	10	90	99
	TRINITY_DN24263_c0_g1_i3	1	p4	(CGCA)5	20	442	461
	TRINITY_DN24216_c0_g1_i3	1	p3	(CGG)5	15	51	65
	TRINITY_DN24216_c0_g1_i3	2	p3	(CGG)6	18	168	185
	TRINITY_DN24216_c0_g1_i4	1	p3	(CGG)5	15	51	65
	TRINITY_DN24216_c0_g3_i1	1	c	(CCG)5tagcca(CCG)5	36	66	101
	TRINITY_DN24216_c1_g1_i1	1	p3	(CGG)7	21	229	249
	TRINITY_DN24249_c0_g1_i2	1	p3	(AAG)7	21	117	137
	TRINITY_DN24249_c1_g1_i2	1	p3	(GGC)5	15	320	334
	TRINITY_DN24249_c1_g1_i1	1	p3	(GGC)5	15	199	213
	TRINITY_DN24249_c2_g1_i1	1	p2	(TC)7	14	75	88
	TRINITY_DN24270_c0_g1_i11	1	p2	(TG)6	12	138	149
	TRINITY_DN24270_c0_g1_i2	1	c	(T)11ggcgttatggttcaggtgtga(T)15	47	991	1037
	TRINITY_DN24270_c0_g1_i9	1	p2	(TG)6	12	138	149
	TRINITY_DN24255_c0_g1_i1	1	p2	(TC)13	26	41	66
	TRINITY_DN24255_c1_g1_i1	1	p1	(A)10	10	127	136
	TRINITY_DN24255_c3_g1_i1	1	p1	(T)12	12	2376	2387
	TRINITY_DN24225_c0_g2_i2	1	p2	(TA)6	12	279	290
	TRINITY_DN24225_c0_g3_i1	1	p1	(T)10	10	227	236
	TRINITY_DN24207_c0_g1_i5	1	p3	(CTG)5	15	293	307
	TRINITY_DN24227_c0_g1_i5	1	p2	(GT)8	16	84	99
	TRINITY_DN24227_c0_g1_i8	1	p2	(GT)7	14	786	799
	TRINITY_DN24227_c0_g1_i13	1	p2	(GT)7	14	744	757
	TRINITY_DN24227_c0_g1_i1	1	p2	(GT)7	14	1111	1124
	TRINITY_DN24227_c0_g1_i7	1	p2	(GT)7	14	744	757
	TRINITY_DN24227_c0_g1_i6	1	p2	(GT)7	14	778	791
	TRINITY_DN24227_c0_g1_i9	1	p2	(GT)7	14	1799	1812
	TRINITY_DN24227_c0_g1_i3	1	p2	(GT)8	16	135	150
	TRINITY_DN24227_c0_g1_i10	1	p2	(GT)7	14	1450	1463
	TRINITY_DN24298_c0_g1_i4	1	p4	(GCCT)6	24	30	53
	TRINITY_DN24298_c0_g1_i2	1	p4	(GCCT)6	24	30	53
	TRINITY_DN24277_c0_g2_i3	1	p2	(AG)6	12	2038	2049
	TRINITY_DN24261_c0_g1_i6	1	p1	(T)10	10	1580	1589
	TRINITY_DN24211_c0_g2_i4	1	p3	(GAA)5	15	121	135
	TRINITY_DN24283_c0_g1_i5	1	p2	(TC)6	12	383	394
	TRINITY_DN24283_c0_g1_i4	1	p2	(TC)6	12	383	394
	TRINITY_DN24258_c1_g1_i1	1	p2	(AC)7	14	1114	1127
	TRINITY_DN24258_c1_g2_i1	1	p1	(T)10	10	375	384
	TRINITY_DN83293_c0_g1_i2	1	p2	(CT)19	38	440	477
	TRINITY_DN83293_c0_g1_i1	1	p4	(CGAG)5	20	61	80
	TRINITY_DN83293_c0_g1_i1	2	p2	(CT)19	38	380	417
	TRINITY_DN83293_c0_g1_i3	1	p2	(CT)19	38	189	226
	TRINITY_DN83293_c0_g2_i1	1	p2	(GA)6	12	72	83
	TRINITY_DN83214_c0_g1_i1	1	p1	(C)10	10	194	203
	TRINITY_DN83214_c0_g1_i5	1	p1	(C)10	10	361	370
	TRINITY_DN83225_c0_g1_i1	1	p1	(A)10	10	235	244
	TRINITY_DN83263_c0_g1_i3	1	p1	(A)11	11	757	767
	TRINITY_DN83294_c0_g1_i1	1	p3	(CGG)5	15	41	55
	TRINITY_DN83294_c0_g2_i2	1	p3	(GCG)5	15	116	130
	TRINITY_DN83294_c0_g2_i1	1	p3	(GCG)5	15	116	130
	TRINITY_DN49928_c0_g1_i1	1	c	(TC)7cctcta(TC)10(AC)10	60	813	872
	TRINITY_DN49928_c0_g1_i5	1	c	(TC)7cctcta(TC)10(AC)10	60	770	829
	TRINITY_DN49924_c2_g1_i1	1	p2	(TG)6	12	259	270
	TRINITY_DN49925_c0_g1_i1	1	p2	(CT)7	14	83	96
	TRINITY_DN49987_c0_g2_i1	1	p1	(A)10	10	417	426
	TRINITY_DN49972_c0_g2_i1	1	p3	(CAG)5	15	128	142
	TRINITY_DN49949_c0_g1_i1	1	p1	(T)13	13	368	380
	TRINITY_DN49934_c0_g1_i1	1	p1	(T)10	10	147	156
	TRINITY_DN49965_c0_g4_i1	1	p1	(T)11	11	333	343
	TRINITY_DN49981_c0_g1_i2	1	p3	(GAC)6	18	80	97
	TRINITY_DN49981_c0_g1_i1	1	c	(CGC)5cgaa(GAC)6	37	61	97
	TRINITY_DN49997_c0_g1_i3	1	p3	(CGC)5	15	197	211
	TRINITY_DN53251_c0_g1_i1	1	p2	(CT)10	20	30	49
	TRINITY_DN53251_c0_g2_i2	1	p2	(CT)6	12	277	288
	TRINITY_DN53251_c0_g2_i1	1	p2	(CT)14	28	277	304
	TRINITY_DN53272_c0_g1_i2	1	p2	(TG)11	22	1442	1463
	TRINITY_DN53272_c0_g1_i1	1	p2	(TG)11	22	1102	1123
	TRINITY_DN53299_c0_g1_i5	1	p3	(TAC)5	15	289	303
	TRINITY_DN53210_c0_g1_i5	1	p3	(CCA)5	15	493	507
	TRINITY_DN53218_c0_g3_i1	1	p1	(T)13	13	34	46
	TRINITY_DN53212_c0_g1_i2	1	p2	(CG)7	14	45	58
	TRINITY_DN53225_c0_g1_i10	1	p3	(AGC)6	18	124	141
	TRINITY_DN53225_c0_g1_i10	2	c	(CGG)6cgaccaga(GGC)5	41	296	336
	TRINITY_DN53225_c0_g1_i5	1	c	(AGC)5tcgttgaagaag(AGC)5agagaagagg(AGC)6	70	72	141
	TRINITY_DN53225_c0_g1_i5	2	p3	(CGG)6	18	280	297
	TRINITY_DN53225_c0_g1_i5	3	p1	(T)10	10	491	500
	TRINITY_DN53225_c0_g1_i2	1	c	(AGC)5agagaagagg(AGC)6	43	99	141
	TRINITY_DN53225_c0_g1_i3	1	c	(AGC)5tcgttgaagaag(AGC)5agagaagagg(AGC)6	70	72	141
	TRINITY_DN53225_c0_g1_i3	2	c	(CGG)6cgaccaga(GGC)5	41	280	320
	TRINITY_DN53225_c0_g1_i1	1	c	(AGC)5tcgttgaagaag(AGC)5agagaagagg(AGC)6	70	72	141
	TRINITY_DN53225_c0_g1_i1	2	p3	(GGC)5	15	322	336
	TRINITY_DN53225_c0_g2_i1	1	p3	(GCC)5	15	49	63
	TRINITY_DN53285_c0_g1_i3	1	p1	(A)13	13	255	267
	TRINITY_DN76977_c0_g1_i8	1	p3	(CGG)5	15	699	713
	TRINITY_DN76977_c0_g1_i10	1	p3	(CGG)5	15	672	686
	TRINITY_DN76977_c0_g1_i6	1	p3	(CGG)5	15	699	713
	TRINITY_DN76977_c0_g1_i2	1	p3	(CGG)5	15	1178	1192
	TRINITY_DN76977_c0_g1_i4	1	p3	(CGG)5	15	769	783
	TRINITY_DN76977_c0_g1_i7	1	p3	(CGG)5	15	681	695
	TRINITY_DN76977_c0_g1_i1	1	p3	(CGG)5	15	672	686
[truncated: 1,390 more rows]

## Sheet: Parent-R2
	ID	SSR nr.	SSR type	SSR	size	start	end
	TRINITY_DN69561_c0_g1_i5	1	p1	(T)10	10	584	593
	TRINITY_DN69501_c0_g1_i1	1	p1	(A)14	14	265	278
	TRINITY_DN69503_c0_g1_i1	1	p4	(TATT)5	20	52	71
	TRINITY_DN69550_c0_g1_i2	1	p4	(CATC)5	20	265	284
	TRINITY_DN69522_c0_g1_i4	1	p3	(CGC)5	15	162	176
	TRINITY_DN69522_c0_g1_i6	1	p1	(A)11	11	34	44
	TRINITY_DN69522_c0_g1_i6	2	p3	(CCG)6	18	232	249
	TRINITY_DN69522_c0_g1_i1	1	p3	(CCG)5	15	158	172
	TRINITY_DN69522_c0_g1_i2	1	p1	(A)11	11	34	44
	TRINITY_DN69522_c0_g1_i2	2	p3	(CCG)6	18	232	249
	TRINITY_DN69595_c1_g1_i1	1	p3	(CCG)5	15	102	116
	TRINITY_DN69527_c0_g2_i2	1	p3	(GGC)5	15	108	122
	TRINITY_DN69527_c0_g2_i1	1	p3	(GGC)5	15	97	111
	TRINITY_DN69527_c1_g1_i5	1	p3	(GAG)5	15	123	137
	TRINITY_DN69527_c1_g1_i1	1	p3	(GAG)5	15	123	137
	TRINITY_DN69575_c0_g1_i3	1	p3	(GCG)5	15	232	246
	TRINITY_DN28078_c0_g1_i8	1	p4	(GATT)5	20	84	103
	TRINITY_DN28078_c0_g1_i2	1	p4	(GATT)5	20	89	108
	TRINITY_DN28078_c0_g1_i5	1	p4	(GATT)5	20	89	108
	TRINITY_DN28078_c0_g1_i4	1	p4	(GATT)5	20	89	108
	TRINITY_DN28006_c0_g1_i1	1	p1	(A)10	10	8	17
	TRINITY_DN28030_c0_g1_i1	1	c	(TCC)5(CT)19gcatggatgcgtaatggcacat(GCA)5	90	51	140
	TRINITY_DN28030_c0_g1_i6	1	c	(TCC)5(CT)19	53	51	103
	TRINITY_DN28030_c0_g1_i5	1	c	(TCC)5(CT)19	53	51	103
	TRINITY_DN28030_c0_g1_i4	1	c	(TCC)5(CT)19gcatggatgcgtaatggcacat(GCA)5	90	51	140
	TRINITY_DN28030_c0_g1_i2	1	c	(TCC)5(CT)19gcgtgatgcgtaatggcacat(GCA)6	92	51	142
	TRINITY_DN28030_c0_g1_i3	1	c	(TCC)5(CT)19	53	51	103
	TRINITY_DN28092_c0_g1_i2	1	p3	(TTC)6	18	238	255
	TRINITY_DN28092_c0_g2_i2	1	p3	(TTC)11	33	584	616
	TRINITY_DN28090_c0_g1_i11	1	p2	(TG)12	24	1286	1309
	TRINITY_DN28090_c0_g1_i2	1	p2	(TG)10	20	1310	1329
	TRINITY_DN28090_c0_g1_i9	1	p2	(TG)12	24	121	144
	TRINITY_DN28072_c0_g1_i4	1	p3	(GCT)6	18	68	85
	TRINITY_DN28068_c0_g1_i6	1	p2	(CG)6	12	309	320
	TRINITY_DN28068_c0_g1_i8	1	p2	(CG)6	12	309	320
	TRINITY_DN28068_c0_g1_i7	1	p2	(CG)6	12	309	320
	TRINITY_DN28068_c0_g1_i11	1	p2	(CG)6	12	309	320
	TRINITY_DN28039_c0_g1_i2	1	c	(CG)7tgccgtataaagtctcccacagctcacacgggcagccgcctgcctagctagccgctggtagaggaggagaagccgt(AG)8ttcagagaggagatagagagttcagagaggagat(AG)6ttcagagag(GA)6gttcagagaggagacagagg(GA)7	207	221	427
	TRINITY_DN28039_c0_g1_i3	1	c	(AG)8ttcagagaggagatagagagttcagagaggagat(AG)6ttcagagag(GA)6gttcagagaggagacagagg(GA)7	117	226	342
	TRINITY_DN28039_c0_g1_i1	1	p2	(CG)6	12	218	229
	TRINITY_DN28039_c0_g1_i1	2	c	(AG)12ggagagagttcagagag(GA)6gttcagagaggagacagagg(GA)7	87	331	417
	TRINITY_DN28039_c2_g1_i1	1	p2	(CA)12	24	40	63
	TRINITY_DN28002_c0_g1_i1	1	p1	(T)10	10	43	52
	TRINITY_DN28079_c0_g2_i1	1	c	(T)10gctgtttcatgttttgatcaagatatttg(T)10	49	1669	1717
	TRINITY_DN28079_c0_g2_i8	1	p1	(T)10	10	1684	1693
	TRINITY_DN28044_c3_g1_i1	1	p2	(CA)7	14	48	61
	TRINITY_DN28059_c0_g1_i1	1	p2	(CT)7	14	54	67
	TRINITY_DN28083_c0_g1_i1	1	p3	(GCA)5	15	287	301
	TRINITY_DN28071_c0_g1_i8	1	p2	(CT)8	16	53	68
	TRINITY_DN28036_c0_g1_i8	1	p1	(T)10	10	1607	1616
	TRINITY_DN28036_c0_g1_i1	1	p1	(T)10	10	1149	1158
	TRINITY_DN28036_c0_g1_i6	1	p1	(T)10	10	1672	1681
	TRINITY_DN28036_c0_g1_i2	1	p1	(T)10	10	771	780
	TRINITY_DN28021_c0_g1_i1	1	p1	(T)10	10	3193	3202
	TRINITY_DN28011_c1_g1_i1	1	p4	(AAGG)6	24	114	137
	TRINITY_DN28050_c0_g2_i2	1	p2	(TC)6	12	646	657
	TRINITY_DN28050_c0_g2_i1	1	p2	(TC)6	12	320	331
	TRINITY_DN28098_c1_g1_i1	1	p3	(GCC)5	15	122	136
	TRINITY_DN28069_c0_g1_i7	1	p2	(GT)8	16	165	180
	TRINITY_DN91563_c1_g1_i1	1	p1	(T)11	11	247	257
	TRINITY_DN91536_c0_g1_i4	1	p3	(TTG)6	18	439	456
	TRINITY_DN91536_c0_g1_i1	1	p4	(TACA)6	24	33	56
	TRINITY_DN91536_c0_g1_i3	1	p4	(TACA)6	24	33	56
	TRINITY_DN91536_c0_g1_i2	1	p4	(TACA)6	24	33	56
	TRINITY_DN91536_c1_g1_i1	1	p4	(TGTA)6	24	359	382
	TRINITY_DN91525_c0_g1_i1	1	p3	(AAG)6	18	592	609
	TRINITY_DN91525_c0_g1_i2	1	p3	(AAG)6	18	265	282
	TRINITY_DN91560_c0_g1_i5	1	p3	(TGC)5	15	43	57
	TRINITY_DN30190_c0_g1_i1	1	c	(CGA)5catcaacacgaccttgtggaagctccgatgccgatgacgtagacgcgtggcatatat(TG)9	90	137	226
	TRINITY_DN30101_c0_g1_i1	1	p3	(GGA)5	15	516	530
	TRINITY_DN30101_c0_g1_i2	1	p3	(CAC)6	18	96	113
	TRINITY_DN30101_c0_g1_i2	2	p3	(GGA)5	15	516	530
	TRINITY_DN30101_c0_g2_i6	1	c	(CT)6agacaatat(AG)6gggaggttataagagttgagaagagaggcatccaaaagacaaagccggctaggttttctccagacatccctcttgt(TC)6	121	24	144
	TRINITY_DN30101_c0_g2_i6	2	c	(CT)11cc(CT)6	36	326	361
	TRINITY_DN30101_c0_g2_i6	3	p3	(CCA)5	15	1484	1498
	TRINITY_DN30101_c0_g2_i6	4	p3	(TTC)6	18	1670	1687
	TRINITY_DN30101_c0_g2_i4	1	c	(CT)6agacaatat(AG)6gggaggttataagagttgagaagagaggcatccaaaagacaaagccggctaggttttctccagacatccctcttgt(TC)6	121	24	144
	TRINITY_DN30101_c0_g2_i4	2	c	(CT)11cc(CT)6	36	326	361
	TRINITY_DN30101_c0_g2_i4	3	p3	(CCA)5	15	1484	1498
	TRINITY_DN30101_c0_g2_i4	4	p3	(TTC)6	18	1678	1695
	TRINITY_DN30101_c0_g2_i8	1	p2	(TC)6	12	133	144
	TRINITY_DN30101_c0_g2_i8	2	c	(CT)11cc(CT)6	36	326	361
	TRINITY_DN30101_c1_g1_i2	1	p2	(TC)7	14	178	191
	TRINITY_DN30138_c0_g1_i2	1	p4	(TTGC)5	20	47	66
	TRINITY_DN30138_c0_g1_i1	1	p4	(TTGC)5	20	47	66
	TRINITY_DN30172_c2_g1_i1	1	p3	(GCC)5	15	128	142
	TRINITY_DN30121_c0_g1_i3	1	p2	(GA)9	18	50	67
	TRINITY_DN30121_c0_g1_i8	1	p2	(GA)9	18	50	67
	TRINITY_DN30197_c0_g1_i2	1	p3	(GCT)5	15	108	122
	TRINITY_DN30197_c0_g1_i1	1	p3	(GCT)5	15	108	122
	TRINITY_DN30197_c0_g1_i4	1	p3	(GCT)5	15	108	122
	TRINITY_DN30197_c0_g1_i6	1	p3	(GCT)5	15	108	122
	TRINITY_DN30155_c0_g1_i1	1	p2	(CA)11	22	139	160
	TRINITY_DN30155_c0_g1_i3	1	p2	(CA)11	22	154	175
	TRINITY_DN30125_c0_g1_i2	1	p3	(TGC)5	15	1322	1336
	TRINITY_DN30125_c0_g1_i3	1	p3	(GAG)5	15	486	500
	TRINITY_DN30161_c0_g1_i1	1	p2	(CT)8	16	196	211
	TRINITY_DN30161_c0_g1_i1	2	p3	(TCT)5	15	401	415
	TRINITY_DN144_c0_g1_i10	1	p4	(CATC)5	20	194	213
	TRINITY_DN144_c0_g1_i7	1	p4	(CATC)5	20	194	213
	TRINITY_DN144_c0_g1_i8	1	p4	(CATC)5	20	194	213
	TRINITY_DN144_c0_g1_i6	1	p4	(CATC)5	20	194	213
	TRINITY_DN144_c0_g1_i2	1	p4	(CATC)5	20	194	213
	TRINITY_DN144_c0_g1_i3	1	p4	(CATC)5	20	194	213
	TRINITY_DN144_c0_g1_i4	1	p4	(CATC)5	20	194	213
	TRINITY_DN144_c0_g1_i11	1	p4	(CATC)5	20	194	213
	TRINITY_DN144_c0_g1_i13	1	p4	(CATC)5	20	194	213
	TRINITY_DN179_c1_g1_i2	1	p3	(TGA)5	15	442	456
	TRINITY_DN194_c0_g2_i1	1	p2	(GA)6	12	285	296
	TRINITY_DN184_c2_g1_i1	1	p1	(A)10	10	197	206
	TRINITY_DN151_c0_g1_i1	1	p1	(A)11	11	1382	1392
	TRINITY_DN193_c0_g1_i7	1	p2	(CG)6	12	197	208
	TRINITY_DN193_c0_g1_i6	1	p2	(CG)6	12	197	208
	TRINITY_DN193_c0_g1_i9	1	p1	(A)10	10	35	44
	TRINITY_DN193_c0_g1_i9	2	p2	(CG)6	12	197	208
	TRINITY_DN193_c0_g1_i4	1	p1	(A)10	10	38	47
	TRINITY_DN193_c0_g1_i5	1	p1	(A)10	10	38	47
	TRINITY_DN122_c0_g1_i2	1	p3	(CTC)5	15	1026	1040
	TRINITY_DN122_c0_g1_i8	1	p3	(CTC)5	15	997	1011
	TRINITY_DN122_c0_g1_i9	1	p3	(CTC)5	15	997	1011
	TRINITY_DN122_c0_g1_i4	1	p3	(CTC)5	15	1035	1049
	TRINITY_DN122_c0_g1_i5	1	p3	(CTC)5	15	1026	1040
	TRINITY_DN139_c0_g1_i3	1	p4	(TGTA)5	20	1941	1960
	TRINITY_DN138_c0_g1_i2	1	p2	(TA)6	12	1896	1907
	TRINITY_DN138_c0_g1_i3	1	p4	(AGGA)6	24	33	56
	TRINITY_DN198_c0_g1_i7	1	p1	(T)11	11	2355	2365
	TRINITY_DN100_c0_g1_i3	1	p1	(T)10	10	5984	5993
	TRINITY_DN100_c0_g2_i1	1	p3	(TCC)5	15	245	259
	TRINITY_DN125_c0_g1_i10	1	p1	(T)10	10	1044	1053
	TRINITY_DN125_c0_g1_i10	2	p1	(T)10	10	2896	2905
	TRINITY_DN132_c0_g2_i4	1	p1	(T)10	10	1224	1233
	TRINITY_DN164_c2_g1_i2	1	p3	(GAA)8	24	249	272
	TRINITY_DN164_c2_g2_i2	1	p3	(GAA)7	21	38	58
	TRINITY_DN164_c2_g2_i3	1	p3	(GAA)7	21	38	58
	TRINITY_DN164_c2_g2_i1	1	p3	(AAG)5	15	132	146
	TRINITY_DN140_c0_g1_i8	1	c	(AC)8gcacg(CA)21	63	12	74
	TRINITY_DN178_c0_g1_i1	1	p1	(A)12	12	27	38
	TRINITY_DN189_c0_g2_i4	1	p1	(T)11	11	2360	2370
	TRINITY_DN121_c0_g3_i1	1	p3	(TTG)5	15	846	860
	TRINITY_DN121_c1_g1_i1	1	p3	(TTG)5	15	126	140
	TRINITY_DN176_c0_g1_i2	1	p3	(ATT)5	15	4854	4868
	TRINITY_DN176_c1_g1_i1	1	p2	(CT)12	24	268	291
	TRINITY_DN176_c1_g1_i5	1	p2	(CT)6	12	274	285
	TRINITY_DN176_c1_g1_i3	1	p2	(CT)14	28	274	301
	TRINITY_DN176_c1_g1_i4	1	p2	(CT)14	28	274	301
	TRINITY_DN176_c1_g1_i2	1	p2	(CT)14	28	268	295
	TRINITY_DN176_c4_g1_i1	1	p2	(CT)8	16	343	358
	TRINITY_DN187_c0_g1_i2	1	p2	(CA)8	16	25	40
	TRINITY_DN187_c1_g1_i6	1	p3	(ACG)5	15	322	336
	TRINITY_DN187_c1_g1_i2	1	p3	(ACG)5	15	322	336
	TRINITY_DN187_c1_g1_i7	1	p3	(ACG)5	15	322	336
	TRINITY_DN187_c1_g1_i9	1	p3	(ACG)5	15	336	350
	TRINITY_DN187_c1_g1_i5	1	p3	(ACG)5	15	336	350
	TRINITY_DN187_c1_g1_i10	1	p3	(ACG)5	15	336	350
	TRINITY_DN187_c1_g1_i4	1	p3	(ACG)5	15	336	350
	TRINITY_DN187_c1_g1_i8	1	p3	(ACG)5	15	322	336
	TRINITY_DN115_c0_g1_i4	1	p1	(T)11	11	32	42
	TRINITY_DN115_c0_g1_i5	1	p1	(T)11	11	32	42
	TRINITY_DN115_c0_g1_i8	1	p1	(T)11	11	32	42
	TRINITY_DN115_c0_g1_i8	2	c	(TG)9tcggtc(T)10	34	465	498
	TRINITY_DN115_c0_g1_i2	1	p1	(T)11	11	32	42
	TRINITY_DN115_c0_g1_i6	1	p1	(T)11	11	32	42
	TRINITY_DN115_c0_g1_i9	1	p1	(T)11	11	32	42
	TRINITY_DN119_c0_g1_i19	1	p2	(TC)6	12	88	99
	TRINITY_DN119_c0_g1_i2	1	p2	(TC)6	12	88	99
	TRINITY_DN119_c0_g1_i14	1	p2	(TC)6	12	88	99
	TRINITY_DN119_c0_g1_i4	1	p2	(TC)11	22	53	74
	TRINITY_DN119_c0_g1_i22	1	p2	(TC)6	12	88	99
	TRINITY_DN133_c0_g1_i3	1	c	(CCA)5(CAA)5	30	45	74
	TRINITY_DN133_c0_g1_i3	2	p2	(TG)12	24	550	573
	TRINITY_DN133_c0_g1_i1	1	c	(CCA)5(CAA)5	30	45	74
	TRINITY_DN133_c0_g1_i2	1	c	(CCA)5(CAA)5	30	45	74
	TRINITY_DN133_c1_g1_i2	1	p2	(TG)12	24	942	965
	TRINITY_DN133_c1_g1_i4	1	p2	(TG)6	12	942	953
	TRINITY_DN133_c1_g1_i1	1	p2	(TG)6	12	938	949
	TRINITY_DN133_c1_g1_i3	1	p2	(TG)23	46	942	987
	TRINITY_DN104_c0_g1_i5	1	p3	(TGC)5	15	1110	1124
	TRINITY_DN104_c0_g1_i3	1	p3	(GAC)6	18	1425	1442
	TRINITY_DN131_c0_g1_i4	1	p3	(CGG)6	18	71	88
	TRINITY_DN131_c0_g1_i1	1	p3	(CGG)6	18	71	88
	TRINITY_DN131_c0_g1_i2	1	p3	(CGG)6	18	71	88
	TRINITY_DN131_c0_g1_i5	1	p3	(CGG)6	18	71	88
	TRINITY_DN131_c0_g1_i3	1	p3	(CGG)6	18	71	88
	TRINITY_DN131_c2_g1_i3	1	p2	(TC)14	28	206	233
	TRINITY_DN114_c0_g1_i3	1	c	(A)10ctgtgtgtg(T)10	29	1322	1350
	TRINITY_DN150_c0_g1_i4	1	p2	(TG)7	14	1783	1796
	TRINITY_DN150_c0_g1_i1	1	p2	(TG)7	14	1783	1796
	TRINITY_DN169_c0_g1_i6	1	p3	(TGG)5	15	446	460
	TRINITY_DN169_c0_g1_i1	1	p3	(TGG)5	15	446	460
	TRINITY_DN126_c0_g2_i2	1	p1	(A)19	19	16	34
	TRINITY_DN145_c0_g1_i1	1	p3	(TAC)6	18	1673	1690
	TRINITY_DN163_c0_g3_i3	1	p3	(GCG)5	15	287	301
	TRINITY_DN112_c0_g2_i1	1	p2	(TC)6	12	317	328
	TRINITY_DN175_c0_g1_i2	1	p3	(CGG)5	15	158	172
	TRINITY_DN175_c0_g1_i5	1	p3	(CGG)5	15	158	172
	TRINITY_DN175_c0_g1_i7	1	p3	(CGG)5	15	158	172
	TRINITY_DN181_c0_g1_i7	1	p1	(A)11	11	277	287
	TRINITY_DN181_c0_g1_i1	1	p2	(GT)6	12	1336	1347
	TRINITY_DN107_c0_g1_i8	1	p1	(A)11	11	1576	1586
	TRINITY_DN107_c0_g1_i10	1	p1	(T)11	11	1101	1111
	TRINITY_DN107_c0_g1_i6	1	p1	(T)11	11	1101	1111
	TRINITY_DN107_c0_g1_i11	1	p1	(A)12	12	1005	1016
	TRINITY_DN107_c0_g1_i18	1	p1	(T)11	11	1101	1111
	TRINITY_DN188_c1_g1_i3	1	p3	(GCT)5	15	340	354
	TRINITY_DN188_c1_g1_i3	2	p2	(TC)6	12	510	521
	TRINITY_DN188_c1_g1_i6	1	p3	(GCT)5	15	340	354
	TRINITY_DN188_c1_g1_i6	2	p2	(TC)6	12	510	521
	TRINITY_DN188_c1_g1_i4	1	p2	(TC)6	12	198	209
	TRINITY_DN188_c1_g1_i10	1	p2	(TC)6	12	198	209
	TRINITY_DN188_c4_g1_i4	1	p2	(TC)17	34	48	81
	TRINITY_DN188_c4_g1_i1	1	p2	(TC)23	46	284	329
	TRINITY_DN188_c5_g1_i5	1	c	(C)12(TC)7	26	186	211
	TRINITY_DN108_c1_g2_i2	1	p3	(CAG)5	15	49	63
	TRINITY_DN108_c1_g2_i1	1	p3	(CAG)5	15	49	63
	TRINITY_DN118_c1_g1_i2	1	p3	(GAA)5	15	1074	1088
	TRINITY_DN118_c1_g1_i1	1	p3	(AGA)7	21	1070	1090
	TRINITY_DN155_c0_g1_i10	1	p1	(T)10	10	3615	3624
	TRINITY_DN155_c0_g1_i1	1	p1	(T)10	10	3618	3627
	TRINITY_DN142_c0_g1_i5	1	p1	(T)10	10	1986	1995
	TRINITY_DN142_c0_g1_i8	1	p3	(CCT)6	18	835	852
	TRINITY_DN142_c0_g1_i8	2	p1	(T)10	10	1994	2003
	TRINITY_DN142_c0_g1_i9	1	p1	(T)10	10	1994	2003
	TRINITY_DN142_c0_g1_i6	1	p3	(CCT)6	18	836	853
	TRINITY_DN142_c0_g1_i6	2	p1	(T)10	10	1995	2004
	TRINITY_DN142_c0_g1_i10	1	p1	(T)10	10	2004	2013
	TRINITY_DN171_c0_g1_i3	1	p1	(T)10	10	1103	1112
	TRINITY_DN171_c0_g1_i7	1	p1	(T)10	10	1085	1094
	TRINITY_DN171_c0_g1_i10	1	p3	(CTC)5	15	133	147
	TRINITY_DN171_c0_g1_i4	1	p1	(T)10	10	1109	1118
	TRINITY_DN171_c0_g1_i6	1	p3	(CTC)5	15	133	147
	TRINITY_DN171_c0_g1_i6	2	p1	(T)10	10	1088	1097
	TRINITY_DN161_c0_g2_i3	1	p3	(CCG)5	15	220	234
	TRINITY_DN161_c0_g2_i3	2	p3	(CCA)6	18	2081	2098
	TRINITY_DN161_c0_g2_i2	1	p3	(CCG)5	15	220	234
	TRINITY_DN161_c0_g2_i2	2	p3	(CCA)6	18	2081	2098
	TRINITY_DN161_c0_g2_i1	1	p3	(CCG)5	15	220	234
	TRINITY_DN161_c0_g2_i1	2	p3	(CCA)6	18	2081	2098
	TRINITY_DN161_c0_g3_i1	1	p3	(GGC)5	15	423	437
	TRINITY_DN101_c0_g1_i1	1	p2	(GT)7	14	903	916
	TRINITY_DN123_c0_g1_i2	1	p3	(AGG)5	15	104	118
	TRINITY_DN123_c0_g1_i1	1	p3	(AGG)5	15	104	118
	TRINITY_DN123_c0_g2_i1	1	p3	(AGG)5	15	284	298
	TRINITY_DN123_c0_g2_i2	1	p3	(AGG)5	15	284	298
	TRINITY_DN124_c1_g1_i1	1	p3	(ACA)5	15	644	658
	TRINITY_DN110_c0_g1_i4	1	p3	(CGA)6	18	39	56
	TRINITY_DN110_c0_g1_i2	1	p3	(GAC)5	15	449	463
	TRINITY_DN110_c0_g1_i3	1	p3	(CGA)6	18	39	56
	TRINITY_DN110_c0_g1_i1	1	p3	(GAC)5	15	449	463
	TRINITY_DN113_c0_g2_i2	1	p3	(GCC)7	21	30	50
	TRINITY_DN111_c0_g2_i2	1	p1	(T)11	11	1232	1242
	TRINITY_DN111_c2_g1_i1	1	p3	(CAG)5	15	179	193
	TRINITY_DN103_c0_g1_i5	1	p2	(CG)6	12	86	97
	TRINITY_DN103_c0_g1_i5	2	p3	(AAG)5	15	831	845
	TRINITY_DN103_c0_g1_i4	1	p3	(AAG)5	15	831	845
	TRINITY_DN103_c0_g1_i3	1	p3	(AAG)5	15	831	845
	TRINITY_DN103_c0_g1_i6	1	p3	(AAG)5	15	590	604
	TRINITY_DN103_c0_g1_i2	1	p3	(AAG)5	15	831	845
	TRINITY_DN103_c0_g1_i1	1	p3	(AAG)5	15	590	604
	TRINITY_DN103_c0_g2_i2	1	p3	(AGG)5	15	339	353
	TRINITY_DN103_c0_g2_i1	1	p3	(AGG)5	15	339	353
	TRINITY_DN88680_c0_g1_i6	1	p3	(TGT)7	21	233	253
	TRINITY_DN88647_c0_g1_i1	1	p2	(AC)6	12	116	127
	TRINITY_DN88643_c0_g2_i1	1	p1	(G)12	12	516	527
	TRINITY_DN88609_c0_g4_i2	1	p3	(CGG)6	18	148	165
	TRINITY_DN57025_c0_g1_i3	1	p1	(T)10	10	58	67
	TRINITY_DN57035_c0_g1_i3	1	p3	(GCC)5	15	585	599
	TRINITY_DN57035_c0_g1_i4	1	p3	(GCC)5	15	585	599
	TRINITY_DN57032_c0_g1_i2	1	p1	(A)10	10	289	298
	TRINITY_DN57020_c0_g1_i1	1	p2	(TC)10	20	1058	1077
	TRINITY_DN57045_c1_g1_i5	1	p3	(CCG)5	15	214	228
	TRINITY_DN57001_c0_g2_i4	1	c	(TAG)5tggcccagggaggcccaggcccagtactgttcatgtaaccctaatgttgtgctatata(TG)6	85	309	393
	TRINITY_DN57001_c0_g2_i4	2	p3	(TGC)5	15	859	873
	TRINITY_DN57001_c0_g2_i2	1	c	(TAG)5tggcccagggaggcccaggcccagtactgttcatgtaaccctaatgttgtgctatata(TG)6	85	309	393
	TRINITY_DN57001_c0_g2_i3	1	c	(TAG)5tggcccagggaggcccaggcccagtactgttcatgtaaccctaatgttgtgctatata(TG)6	85	309	393
	TRINITY_DN57001_c0_g3_i2	1	p3	(CAG)5	15	852	866
	TRINITY_DN57001_c1_g1_i1	1	p3	(CAC)5	15	240	254
	TRINITY_DN57066_c0_g1_i6	1	p1	(T)10	10	581	590
	TRINITY_DN57098_c0_g1_i3	1	p3	(TTG)8	24	175	198
	TRINITY_DN57098_c0_g1_i3	2	p3	(TTG)8	24	560	583
	TRINITY_DN57098_c0_g1_i5	1	p3	(TTG)8	24	175	198
	TRINITY_DN57098_c0_g1_i6	1	p3	(TGC)6	18	189	206
	TRINITY_DN59536_c0_g2_i2	1	p2	(GT)6	12	206	217
	TRINITY_DN59536_c0_g2_i1	1	p2	(GT)6	12	209	220
	TRINITY_DN59513_c0_g1_i2	1	p2	(GT)7	14	677	690
	TRINITY_DN59513_c0_g3_i1	1	p2	(GT)7	14	194	207
	TRINITY_DN59549_c0_g1_i1	1	p1	(T)10	10	443	452
	TRINITY_DN59564_c0_g1_i5	1	p1	(A)10	10	217	226
	TRINITY_DN59548_c0_g1_i4	1	p1	(T)10	10	824	833
	TRINITY_DN59516_c0_g1_i1	1	p3	(GTC)5	15	179	193
	TRINITY_DN59545_c0_g1_i2	1	p3	(GCC)7	21	131	151
	TRINITY_DN59555_c0_g1_i1	1	p3	(CGG)5	15	24	38
	TRINITY_DN59555_c0_g2_i1	1	p3	(CGG)6	18	75	92
	TRINITY_DN18702_c0_g1_i3	1	p3	(AGC)5	15	422	436
	TRINITY_DN18702_c0_g1_i4	1	p3	(AGC)5	15	422	436
	TRINITY_DN18736_c0_g3_i1	1	p2	(AG)9	18	97	114
	TRINITY_DN18775_c0_g1_i2	1	p5	(GCTTG)5	25	185	209
	TRINITY_DN18775_c0_g1_i9	1	p5	(GCTTG)5	25	185	209
	TRINITY_DN18775_c1_g1_i1	1	p3	(GAG)6	18	294	311
	TRINITY_DN18749_c0_g1_i5	1	p3	(CCG)5	15	34	48
	TRINITY_DN18749_c0_g1_i2	1	p3	(CCG)5	15	34	48
	TRINITY_DN18778_c0_g1_i3	1	p1	(A)10	10	588	597
	TRINITY_DN18778_c0_g1_i1	1	p1	(A)10	10	591	600
	TRINITY_DN18737_c0_g1_i3	1	p3	(AGG)5	15	69	83
	TRINITY_DN18737_c0_g1_i2	1	p3	(CGC)6	18	351	368
	TRINITY_DN18737_c0_g1_i7	1	p3	(AGG)5	15	69	83
	TRINITY_DN18730_c0_g1_i2	1	p2	(GA)16	32	745	776
	TRINITY_DN18730_c0_g1_i7	1	p3	(TCC)6	18	33	50
	TRINITY_DN18730_c0_g1_i7	2	p2	(GA)13	26	1163	1188
	TRINITY_DN18730_c0_g1_i8	1	p2	(GA)16	32	1395	1426
	TRINITY_DN18730_c0_g1_i1	1	p3	(TCC)6	18	33	50
	TRINITY_DN18730_c0_g1_i9	1	p2	(GA)16	32	1476	1507
	TRINITY_DN18773_c0_g1_i7	1	p3	(CTT)5	15	177	191
	TRINITY_DN18773_c0_g1_i4	1	p3	(CTT)5	15	149	163
	TRINITY_DN18777_c0_g1_i1	1	p1	(T)10	10	471	480
	TRINITY_DN18777_c0_g1_i2	1	p1	(T)10	10	472	481
	TRINITY_DN18741_c0_g1_i15	1	c	(TTC)6tgagtattcctctaggtagctctagatcaagctctggtagctgcaatggag(CTT)6	87	724	810
	TRINITY_DN18741_c0_g1_i5	1	c	(TTC)6tgagtattcctctaggtagctctagatcaagctctggtagctgcaatggag(CTT)6	87	786	872
	TRINITY_DN18729_c0_g1_i4	1	p3	(CTC)5	15	148	162
	TRINITY_DN18792_c0_g1_i3	1	p2	(CT)6	12	809	820
	TRINITY_DN18706_c0_g1_i9	1	p2	(GT)6	12	3144	3155
	TRINITY_DN18706_c0_g1_i3	1	p2	(GT)6	12	3110	3121
	TRINITY_DN18706_c0_g1_i6	1	p2	(CG)6	12	305	316
	TRINITY_DN18706_c0_g1_i4	1	p2	(CG)6	12	305	316
	TRINITY_DN18745_c0_g3_i2	1	p1	(A)14	14	68	81
	TRINITY_DN18770_c0_g2_i2	1	p3	(GCC)5	15	53	67
	TRINITY_DN18770_c0_g2_i7	1	p2	(TG)6	12	2958	2969
	TRINITY_DN18770_c0_g2_i6	1	p2	(TG)6	12	1199	1210
	TRINITY_DN18711_c0_g1_i10	1	p2	(CT)6	12	537	548
	TRINITY_DN18711_c0_g1_i10	2	p3	(GGC)5	15	669	683
	TRINITY_DN18711_c0_g1_i8	1	p2	(CT)6	12	537	548
	TRINITY_DN18711_c0_g1_i8	2	p3	(GGC)5	15	669	683
	TRINITY_DN18711_c0_g1_i14	1	p2	(CT)6	12	537	548
	TRINITY_DN18711_c0_g1_i14	2	p3	(GGC)5	15	669	683
	TRINITY_DN18711_c0_g1_i17	1	p2	(CT)6	12	537	548
	TRINITY_DN18711_c0_g1_i17	2	p3	(GGC)5	15	669	683
	TRINITY_DN18711_c0_g1_i4	1	p2	(CT)6	12	537	548
	TRINITY_DN18711_c0_g1_i4	2	p3	(GGC)5	15	669	683
	TRINITY_DN18711_c0_g1_i11	1	p2	(CT)6	12	537	548
	TRINITY_DN18711_c0_g1_i11	2	p3	(GGC)5	15	669	683
	TRINITY_DN18711_c0_g1_i23	1	p2	(CT)6	12	537	548
	TRINITY_DN18711_c0_g1_i23	2	p3	(GGC)5	15	669	683
	TRINITY_DN18711_c2_g1_i1	1	p2	(GT)10	20	578	597
	TRINITY_DN18766_c1_g1_i1	1	p2	(CT)7	14	31	44
	TRINITY_DN18766_c1_g1_i8	1	p2	(CT)7	14	31	44
	TRINITY_DN18782_c0_g1_i1	1	p2	(AG)6	12	235	246
	TRINITY_DN18769_c0_g1_i5	1	p1	(A)10	10	1345	1354
	TRINITY_DN18726_c0_g1_i4	1	c	(TC)6ccgctctgctggtcggcgagaggcagcctgccatgtgggcctcgccggggaggctgccggcgat(GGA)5	91	179	269
	TRINITY_DN18726_c0_g1_i7	1	c	(TC)6ccgctctgctggtcggcgagaggcagcctgccatgtgggcctcgccggggaggctgccggcgat(GGA)5	91	179	269
	TRINITY_DN18726_c0_g1_i1	1	p3	(GGA)5	15	262	276
	TRINITY_DN22802_c0_g3_i1	1	p3	(AGC)5	15	199	213
	TRINITY_DN22802_c0_g3_i3	1	p3	(AGC)5	15	199	213
	TRINITY_DN22802_c1_g2_i1	1	p1	(T)10	10	2	11
	TRINITY_DN22802_c2_g1_i2	1	p2	(AG)6	12	69	80
	TRINITY_DN22802_c2_g1_i3	1	p2	(AG)8	16	11	26
	TRINITY_DN22802_c4_g1_i3	1	p2	(TC)6	12	228	239
	TRINITY_DN22802_c4_g1_i1	1	p2	(TC)6	12	228	239
	TRINITY_DN22801_c0_g5_i1	1	p3	(CGA)5	15	59	73
	TRINITY_DN22818_c0_g1_i6	1	p3	(GAC)5	15	579	593
	TRINITY_DN22818_c0_g1_i2	1	p3	(GAG)5	15	420	434
	TRINITY_DN22818_c0_g1_i5	1	p3	(GAG)5	15	670	684
	TRINITY_DN22818_c0_g1_i1	1	p3	(GAC)5	15	440	454
	TRINITY_DN22832_c0_g1_i3	1	p3	(CGC)5	15	53	67
	TRINITY_DN22832_c0_g1_i7	1	p3	(CGC)6	18	50	67
	TRINITY_DN22832_c0_g1_i6	1	p3	(CGC)6	18	50	67
	TRINITY_DN22895_c0_g1_i1	1	p2	(TC)7	14	251	264
	TRINITY_DN22850_c0_g3_i1	1	p1	(A)10	10	275	284
	TRINITY_DN22804_c0_g1_i1	1	p3	(CGG)5	15	359	373
	TRINITY_DN22804_c0_g1_i1	2	p3	(AGC)7	21	514	534
	TRINITY_DN22804_c0_g1_i4	1	p3	(CGG)5	15	359	373
	TRINITY_DN22804_c0_g1_i5	1	p3	(AGC)7	21	517	537
	TRINITY_DN22876_c0_g1_i1	1	p1	(T)11	11	776	786
	TRINITY_DN22873_c1_g1_i3	1	p1	(T)10	10	2371	2380
	TRINITY_DN22864_c0_g1_i7	1	p2	(CT)7	14	1318	1331
	TRINITY_DN22820_c0_g1_i4	1	p3	(CCT)7	21	63	83
	TRINITY_DN22803_c0_g1_i1	1	p1	(T)10	10	1443	1452
	TRINITY_DN22829_c0_g3_i2	1	p3	(GGC)5	15	209	223
	TRINITY_DN22829_c0_g3_i1	1	p3	(GGC)5	15	212	226
	TRINITY_DN22807_c1_g1_i8	1	p4	(TATC)6	24	48	71
	TRINITY_DN22825_c0_g1_i2	1	p2	(GC)7	14	283	296
	TRINITY_DN22819_c1_g1_i2	1	p1	(T)10	10	104	113
	TRINITY_DN22867_c0_g1_i2	1	p1	(A)10	10	2709	2718
	TRINITY_DN22845_c1_g1_i6	1	p1	(T)10	10	2698	2707
	TRINITY_DN22845_c1_g1_i5	1	p1	(T)10	10	2881	2890
	TRINITY_DN22845_c1_g1_i8	1	p1	(T)10	10	2881	2890
	TRINITY_DN22835_c0_g1_i7	1	p1	(T)11	11	1680	1690
	TRINITY_DN22835_c0_g1_i4	1	p1	(T)11	11	1680	1690
	TRINITY_DN22835_c0_g1_i1	1	p1	(T)11	11	1680	1690
	TRINITY_DN22835_c0_g1_i8	1	p1	(T)11	11	1680	1690
	TRINITY_DN22835_c0_g1_i5	1	p1	(T)11	11	1680	1690
	TRINITY_DN22835_c0_g1_i3	1	p1	(T)11	11	1680	1690
	TRINITY_DN22835_c0_g1_i2	1	p1	(T)11	11	1680	1690
	TRINITY_DN22838_c1_g1_i1	1	p3	(TCC)5	15	42	56
	TRINITY_DN60428_c0_g1_i7	1	p3	(TCT)5	15	287	301
	TRINITY_DN60428_c0_g2_i3	1	p3	(GGA)5	15	62	76
	TRINITY_DN60456_c0_g1_i3	1	p2	(TC)10	20	323	342
	TRINITY_DN60456_c1_g1_i1	1	p2	(CT)8	16	31	46
	TRINITY_DN60456_c1_g1_i1	2	p2	(TG)9	18	539	556
	TRINITY_DN60456_c1_g1_i1	3	p2	(TG)9	18	796	813
	TRINITY_DN60456_c1_g1_i7	1	p2	(CT)8	16	31	46
	TRINITY_DN60423_c0_g1_i5	1	p3	(AGG)6	18	24	41
	TRINITY_DN60496_c0_g1_i2	1	p1	(C)10	10	157	166
	TRINITY_DN60476_c0_g1_i2	1	p3	(TCC)6	18	109	126
	TRINITY_DN60442_c0_g1_i3	1	p2	(TG)6	12	89	100
	TRINITY_DN60442_c0_g1_i2	1	p2	(TG)6	12	89	100
	TRINITY_DN60410_c0_g1_i6	1	p1	(T)10	10	537	546
	TRINITY_DN60410_c0_g1_i2	1	p1	(T)10	10	652	661
	TRINITY_DN84315_c0_g1_i2	1	p3	(TCG)5	15	114	128
	TRINITY_DN84315_c0_g1_i1	1	p3	(TCG)5	15	114	128
	TRINITY_DN84315_c1_g1_i1	1	p3	(CGA)5	15	245	259
	TRINITY_DN84333_c0_g1_i9	1	p1	(T)11	11	1233	1243
	TRINITY_DN3023_c0_g1_i1	1	p3	(TCT)5	15	333	347
	TRINITY_DN3051_c0_g1_i3	1	p2	(TG)6	12	994	1005
	TRINITY_DN3051_c0_g1_i9	1	p2	(TG)6	12	979	990
	TRINITY_DN3030_c0_g1_i4	1	p4	(CTGT)6	24	2010	2033
	TRINITY_DN3030_c0_g1_i1	1	p4	(CTGT)6	24	2004	2027
	TRINITY_DN3054_c0_g1_i1	1	p3	(CTC)8	24	247	270
	TRINITY_DN3054_c0_g1_i2	1	p3	(CTC)6	18	244	261
	TRINITY_DN3054_c0_g1_i3	1	p3	(CTC)5	15	244	258
	TRINITY_DN3025_c0_g1_i7	1	p3	(CCG)8	24	63	86
	TRINITY_DN3025_c0_g1_i7	2	p3	(ACG)5	15	291	305
	TRINITY_DN3025_c0_g1_i1	1	p3	(ACG)5	15	291	305
	TRINITY_DN3025_c0_g1_i6	1	p3	(ACG)5	15	291	305
	TRINITY_DN3025_c0_g1_i5	1	p3	(ACG)5	15	291	305
	TRINITY_DN3025_c0_g1_i8	1	p3	(ACG)5	15	291	305
	TRINITY_DN3025_c0_g1_i2	1	p3	(ACG)5	15	291	305
	TRINITY_DN3025_c0_g1_i3	1	p3	(ACG)5	15	291	305
	TRINITY_DN3099_c3_g1_i1	1	p3	(GGC)6	18	15	32
	TRINITY_DN3016_c0_g1_i3	1	c	(T)10cgggagagtcacggttttgcttccgcgagaggcacggttgtgctttcgcgagagtcacggccgtgcctctcggaaagggaaaaacaaaacgcg(T)10	113	1509	1621
	TRINITY_DN3016_c0_g1_i5	1	c	(T)10cgggagagtcacggttttgcttccgcgagaggcacggttgtgctttcgcgagagtcacggccgtgcctctcggaaagggaaaaacaaaacgcg(T)10	113	2363	2475
	TRINITY_DN3016_c0_g1_i11	1	p2	(GA)6	12	380	391
	TRINITY_DN3016_c0_g1_i2	1	p2	(GA)6	12	380	391
	TRINITY_DN3017_c0_g1_i6	1	p2	(CG)6	12	113	124
	TRINITY_DN3017_c0_g1_i4	1	p2	(CG)6	12	113	124
	TRINITY_DN3017_c0_g1_i2	1	p2	(CG)6	12	113	124
	TRINITY_DN3077_c0_g1_i4	1	p3	(TCC)5	15	33	47
	TRINITY_DN3077_c0_g1_i3	1	p3	(TCC)5	15	33	47
	TRINITY_DN3077_c0_g1_i5	1	p3	(TCC)5	15	33	47
	TRINITY_DN3077_c0_g1_i1	1	p3	(TCC)5	15	33	47
	TRINITY_DN3077_c0_g1_i2	1	p3	(TCC)5	15	33	47
	TRINITY_DN3077_c0_g2_i1	1	p3	(CGC)6	18	28	45
	TRINITY_DN3046_c0_g1_i7	1	p3	(CGC)5	15	133	147
	TRINITY_DN3046_c0_g1_i2	1	c	(CCG)6cgccgcccgtctcgcccgccggcttgtcctccctccacctccccagcgaagcgccggt(CGC)5	91	65	155
	TRINITY_DN3046_c0_g1_i4	1	p3	(CGC)5	15	168	182
	TRINITY_DN3046_c0_g1_i10	1	p3	(CGC)5	15	168	182
	TRINITY_DN3046_c0_g1_i1	1	p3	(CGC)5	15	133	147
	TRINITY_DN3046_c0_g1_i9	1	p3	(CGC)5	15	168	182
	TRINITY_DN3046_c0_g1_i6	1	p3	(CGC)5	15	168	182
	TRINITY_DN3046_c0_g1_i5	1	p3	(CGC)5	15	133	147
	TRINITY_DN3046_c0_g1_i8	1	p3	(CGC)5	15	168	182
	TRINITY_DN3046_c0_g1_i3	1	p3	(CGC)5	15	133	147
	TRINITY_DN3009_c0_g1_i2	1	p3	(TTG)8	24	1818	1841
	TRINITY_DN3009_c0_g1_i7	1	p3	(TTG)8	24	2214	2237
	TRINITY_DN3009_c0_g1_i10	1	p3	(TTG)8	24	2214	2237
	TRINITY_DN3009_c0_g1_i4	1	p3	(TTG)8	24	2068	2091
	TRINITY_DN3009_c0_g1_i1	1	p3	(TTG)8	24	1818	1841
	TRINITY_DN3009_c0_g1_i5	1	p3	(TTG)8	24	1964	1987
	TRINITY_DN3009_c0_g1_i3	1	p3	(TTG)8	24	1964	1987
	TRINITY_DN3009_c0_g1_i6	1	p3	(TTG)8	24	1964	1987
	TRINITY_DN3005_c1_g1_i9	1	p3	(GAA)5	15	79	93
	TRINITY_DN3005_c1_g1_i6	1	p2	(TG)6	12	530	541
	TRINITY_DN3047_c0_g1_i7	1	p3	(CCG)5	15	71	85
	TRINITY_DN3047_c0_g1_i2	1	p3	(CCG)5	15	71	85
	TRINITY_DN3047_c0_g1_i9	1	p3	(CCG)5	15	71	85
	TRINITY_DN3031_c0_g2_i1	1	p3	(GGC)5	15	749	763
	TRINITY_DN3052_c0_g1_i15	1	c	(GCA)5gatgatgcagcaggctctgctcatgcaccagcac(CAG)5	64	365	428
	TRINITY_DN3052_c0_g1_i10	1	p3	(GCA)5	15	365	379
	TRINITY_DN3052_c0_g1_i11	1	p3	(GCA)5	15	365	379
	TRINITY_DN3052_c0_g1_i8	1	c	(GCA)5gatgatgcagcaggcgctgctcatgcaccac(CAG)6	64	391	454
	TRINITY_DN3052_c0_g1_i3	1	p1	(T)10	10	192	201
	TRINITY_DN3052_c0_g1_i3	2	c	(GCA)5gatgatgcagcaggctctgctcatgcaccagcac(CAG)5	64	396	459
	TRINITY_DN3052_c0_g1_i2	1	p1	(T)10	10	192	201
	TRINITY_DN3052_c0_g1_i2	2	c	(GCA)5gatgatgcagcaggctctgctcatgcaccagcac(CAG)5	64	396	459
	TRINITY_DN3052_c1_g1_i1	1	p3	(CAG)5	15	46	60
	TRINITY_DN3097_c2_g1_i1	1	p3	(CCT)6	18	242	259
	TRINITY_DN3022_c0_g1_i7	1	p3	(AGC)5	15	7835	7849
	TRINITY_DN3022_c0_g1_i6	1	p3	(AGC)5	15	7835	7849
	TRINITY_DN3076_c0_g1_i11	1	p3	(TTG)5	15	1113	1127
	TRINITY_DN3076_c0_g1_i5	1	p3	(TTG)5	15	1245	1259
	TRINITY_DN3076_c0_g1_i6	1	p3	(TTG)5	15	1217	1231
	TRINITY_DN3076_c0_g1_i7	1	p3	(TTG)5	15	1141	1155
	TRINITY_DN3076_c0_g1_i1	1	p3	(GCA)6	18	77	94
	TRINITY_DN3076_c0_g1_i8	1	p3	(TTG)5	15	1141	1155
	TRINITY_DN3076_c0_g4_i2	1	p3	(GCA)6	18	77	94
	TRINITY_DN3076_c0_g4_i1	1	p3	(GCA)6	18	77	94
	TRINITY_DN3027_c0_g1_i9	1	p2	(CT)6	12	1712	1723
	TRINITY_DN3027_c0_g1_i5	1	p2	(CT)6	12	1449	1460
	TRINITY_DN3027_c0_g1_i6	1	p2	(CT)6	12	1720	1731
	TRINITY_DN3027_c0_g1_i7	1	p3	(CCG)6	18	239	256
	TRINITY_DN3027_c0_g1_i7	2	p2	(CT)6	12	1721	1732
	TRINITY_DN3091_c0_g1_i3	1	p1	(T)11	11	1832	1842
	TRINITY_DN3091_c0_g1_i1	1	p1	(T)11	11	1831	1841
	TRINITY_DN3068_c0_g1_i12	1	p2	(TC)7	14	170	183
	TRINITY_DN3068_c0_g1_i6	1	p2	(TC)7	14	170	183
	TRINITY_DN3068_c0_g1_i11	1	p2	(TC)7	14	170	183
	TRINITY_DN3012_c0_g1_i15	1	p2	(GT)6	12	1876	1887
	TRINITY_DN3012_c0_g1_i13	1	p2	(GT)6	12	1899	1910
	TRINITY_DN3012_c0_g1_i2	1	p2	(GT)6	12	1876	1887
	TRINITY_DN3012_c0_g1_i3	1	p2	(GT)6	12	906	917
	TRINITY_DN3012_c0_g1_i10	1	p2	(GT)6	12	816	827
	TRINITY_DN3012_c0_g1_i1	1	p2	(GT)6	12	906	917
	TRINITY_DN3012_c0_g1_i16	1	p2	(GT)6	12	1899	1910
	TRINITY_DN3012_c0_g1_i14	1	p2	(GT)6	12	1876	1887
	TRINITY_DN3012_c0_g1_i7	1	p2	(GT)6	12	1899	1910
	TRINITY_DN3048_c0_g1_i2	1	p3	(CCT)5	15	21	35
	TRINITY_DN3029_c0_g1_i2	1	p3	(CCT)6	18	44	61
	TRINITY_DN3029_c0_g1_i4	1	p3	(CCT)6	18	44	61
	TRINITY_DN3080_c0_g1_i1	1	p3	(CCG)5	15	664	678
	TRINITY_DN3080_c0_g1_i2	1	p3	(CCG)5	15	650	664
	TRINITY_DN3080_c1_g2_i4	1	p3	(GAT)6	18	1230	1247
	TRINITY_DN3080_c1_g2_i4	2	p2	(AG)10	20	3233	3252
	TRINITY_DN3080_c1_g2_i3	1	p3	(CCG)7	21	43	63
	TRINITY_DN3080_c1_g2_i8	1	p3	(CCG)7	21	43	63
	TRINITY_DN3080_c1_g2_i8	2	p3	(GAT)6	18	1230	1247
	TRINITY_DN3080_c1_g2_i8	3	p1	(A)10	10	3316	3325
	TRINITY_DN3080_c1_g2_i7	1	p3	(CCG)7	21	43	63
	TRINITY_DN3080_c1_g2_i1	1	p3	(GAT)6	18	128	145
	TRINITY_DN3080_c1_g2_i1	2	c	(AG)10cttaggtctagggtttgtttttgtaatcctttattaataggaagggcgtccttgtattgattcattcccaacaagaat(A)10	108	2131	2238
	TRINITY_DN3080_c1_g2_i5	1	p3	(CCG)7	21	43	63
	TRINITY_DN3080_c1_g2_i2	1	p3	(GAT)6	18	128	145
	TRINITY_DN3080_c1_g2_i6	1	p3	(GAT)6	18	128	145
	TRINITY_DN3080_c1_g2_i6	2	p1	(A)10	10	2214	2223
	TRINITY_DN3080_c3_g1_i1	1	p3	(GAT)5	15	221	235
	TRINITY_DN3080_c3_g1_i2	1	p3	(GAT)5	15	222	236
	TRINITY_DN3065_c1_g1_i1	1	p3	(GCT)6	18	78	95
	TRINITY_DN3065_c1_g1_i4	1	p3	(GCT)6	18	146	163
	TRINITY_DN3075_c0_g1_i17	1	p1	(A)11	11	57	67
	TRINITY_DN3094_c0_g1_i11	1	p3	(AGC)5	15	645	659
	TRINITY_DN3000_c0_g1_i2	1	p1	(A)10	10	3434	3443
	TRINITY_DN3000_c0_g1_i7	1	p1	(A)10	10	2481	2490
	TRINITY_DN3000_c0_g1_i3	1	p1	(A)10	10	3434	3443
	TRINITY_DN3024_c0_g1_i3	1	p3	(CGG)8	24	44	67
	TRINITY_DN3024_c0_g1_i2	1	p3	(CGG)8	24	44	67
	TRINITY_DN3024_c0_g1_i6	1	p3	(CGG)8	24	44	67
	TRINITY_DN3024_c0_g1_i1	1	p3	(CGG)8	24	44	67
	TRINITY_DN3024_c0_g1_i5	1	p3	(CGG)8	24	44	67
	TRINITY_DN3093_c0_g2_i1	1	p3	(GCC)5	15	566	580
	TRINITY_DN3002_c0_g1_i18	1	c	(CT)9ttctc(TG)11	45	2199	2243
	TRINITY_DN3002_c0_g1_i4	1	p3	(GTC)5	15	448	462
	TRINITY_DN3002_c0_g1_i15	1	c	(CT)9ttctc(TG)7	37	2548	2584
	TRINITY_DN3081_c0_g1_i1	1	p3	(CGG)5	15	625	639
	TRINITY_DN3081_c1_g1_i2	1	p2	(GC)6	12	411	422
	TRINITY_DN58607_c0_g1_i1	1	p1	(A)10	10	22	31
	TRINITY_DN58628_c0_g1_i2	1	p3	(AAG)5	15	190	204
	TRINITY_DN58665_c0_g1_i5	1	p1	(A)10	10	145	154
	TRINITY_DN58665_c0_g1_i6	1	p1	(A)10	10	145	154
	TRINITY_DN58665_c0_g2_i1	1	p1	(A)14	14	187	200
	TRINITY_DN58675_c0_g1_i1	1	p1	(T)10	10	271	280
	TRINITY_DN58693_c0_g1_i2	1	p3	(TTG)8	24	32	55
	TRINITY_DN58616_c0_g1_i1	1	p1	(T)10	10	2319	2328
	TRINITY_DN58616_c0_g1_i2	1	p1	(T)10	10	2319	2328
	TRINITY_DN58642_c0_g2_i1	1	p1	(A)11	11	166	176
	TRINITY_DN58661_c1_g2_i1	1	p1	(A)11	11	975	985
	TRINITY_DN58661_c1_g2_i1	2	p1	(A)10	10	1094	1103
	TRINITY_DN16118_c0_g1_i4	1	p3	(CAG)6	18	2	19
	TRINITY_DN16145_c0_g1_i8	1	p2	(TG)6	12	3172	3183
	TRINITY_DN16145_c0_g1_i2	1	p2	(TG)6	12	3217	3228
	TRINITY_DN16145_c0_g1_i11	1	p2	(TG)6	12	2439	2450
	TRINITY_DN16184_c0_g1_i1	1	p3	(GCA)5	15	271	285
	TRINITY_DN16101_c2_g1_i2	1	p3	(AGC)6	18	61	78
	TRINITY_DN16199_c0_g1_i1	1	p3	(CCG)5	15	117	131
	TRINITY_DN16139_c1_g1_i11	1	p2	(TG)7	14	215	228
	TRINITY_DN16139_c1_g1_i17	1	p2	(TG)7	14	105	118
	TRINITY_DN16151_c0_g1_i3	1	p2	(GA)7	14	26	39
	TRINITY_DN16155_c0_g1_i7	1	p6	(GACTAT)7	42	1029	1070
	TRINITY_DN16155_c0_g1_i8	1	p6	(GACTAT)7	42	317	358
	TRINITY_DN16155_c0_g1_i6	1	p6	(GACTAT)7	42	1013	1054
	TRINITY_DN16155_c0_g1_i15	1	p6	(GACTAT)7	42	1487	1528
	TRINITY_DN16155_c0_g1_i11	1	p6	(GACTAT)7	42	2549	2590
	TRINITY_DN16155_c0_g1_i1	1	p6	(GACTAT)7	42	1487	1528
	TRINITY_DN16153_c0_g1_i6	1	p3	(GCC)5	15	176	190
	TRINITY_DN16153_c0_g1_i2	1	p3	(GCC)5	15	176	190
	TRINITY_DN16153_c0_g1_i5	1	p3	(GCC)5	15	176	190
	TRINITY_DN16179_c0_g1_i1	1	p3	(TAG)6	18	326	343
	TRINITY_DN16149_c0_g1_i2	1	p3	(CCG)5	15	86	100
	TRINITY_DN16149_c0_g1_i1	1	p3	(CCG)5	15	86	100
	TRINITY_DN16125_c0_g1_i9	1	p2	(AT)6	12	2488	2499
	TRINITY_DN16125_c0_g1_i12	1	p1	(A)11	11	312	322
	TRINITY_DN16117_c0_g1_i1	1	p1	(T)10	10	1063	1072
	TRINITY_DN16117_c0_g1_i12	1	p1	(T)10	10	1130	1139
	TRINITY_DN16117_c0_g1_i9	1	p1	(T)10	10	983	992
	TRINITY_DN16180_c0_g1_i5	1	p3	(GGT)6	18	217	234
	TRINITY_DN16180_c0_g1_i6	1	p3	(GGT)6	18	217	234
	TRINITY_DN16180_c0_g1_i4	1	p3	(GGT)6	18	217	234
	TRINITY_DN16160_c0_g1_i5	1	p3	(CGA)7	21	244	264
	TRINITY_DN16160_c0_g1_i4	1	p3	(CGA)7	21	244	264
	TRINITY_DN16160_c0_g1_i2	1	p3	(CGA)6	18	247	264
	TRINITY_DN16134_c0_g2_i1	1	p3	(TGA)5	15	232	246
	TRINITY_DN16134_c0_g2_i2	1	p3	(TGA)5	15	196	210
	TRINITY_DN16181_c0_g1_i4	1	p3	(CCG)5	15	123	137
	TRINITY_DN16181_c0_g1_i5	1	c	(CCG)5cccgggccgctagggtttcgggcagccgcgaggccagcgnnnnnnnnnnnnnnnnnnnnnnnnnnnnnnnnnnnnccaacggcggcgcggcctgcta(CGG)5	127	123	249
	TRINITY_DN16181_c0_g1_i3	1	p3	(CGG)5	15	235	249
	TRINITY_DN16181_c0_g1_i2	1	p3	(CCG)5	15	123	137
	TRINITY_DN16181_c0_g1_i1	1	c	(CCG)5cccgggccgctagggtttcgggcagccgcgaggccagcgtcgatgagtctgacggcgtcgccgactggggcctccccaacggcggcgcggcctgcta(CGG)5	127	123	249
	TRINITY_DN16111_c0_g1_i6	1	p3	(ATT)5	15	83	97
	TRINITY_DN16111_c0_g1_i10	1	p3	(ATT)5	15	83	97
	TRINITY_DN16111_c0_g2_i1	1	p1	(A)10	10	2442	2451
	TRINITY_DN16140_c0_g1_i5	1	p3	(GCC)5	15	42	56
	TRINITY_DN16140_c0_g1_i1	1	p3	(GCC)5	15	42	56
	TRINITY_DN16140_c0_g1_i13	1	p3	(GCC)5	15	42	56
	TRINITY_DN16140_c0_g1_i9	1	p3	(GCC)5	15	42	56
	TRINITY_DN16140_c0_g1_i10	1	p3	(GCC)5	15	42	56
	TRINITY_DN16146_c0_g1_i3	1	p3	(GCG)5	15	13	27
	TRINITY_DN16167_c0_g1_i1	1	c	(CTC)5cgccgccgccgcgtccttcaacggctgggccgacctccccgccgacacggacctccccttcagcctcccgcagcagtccctcgccgccgccccg(CTC)5	124	275	398
	TRINITY_DN16167_c0_g1_i6	1	p3	(CTC)5	15	284	298
	TRINITY_DN16167_c0_g1_i2	1	p3	(CTC)5	15	167	181
	TRINITY_DN16167_c0_g2_i1	1	p1	(C)13	13	220	232
	TRINITY_DN16108_c0_g3_i1	1	p1	(T)10	10	613	622
	TRINITY_DN16192_c0_g1_i5	1	p4	(AGAA)9	36	159	194
	TRINITY_DN16131_c0_g1_i3	1	p2	(CT)6	12	55	66
	TRINITY_DN16189_c0_g1_i4	1	p4	(CAAT)5	20	223	242
	TRINITY_DN16130_c0_g3_i2	1	p2	(AC)6	12	105	116
	TRINITY_DN16130_c0_g3_i2	2	p4	(TTCT)5	20	1041	1060
	TRINITY_DN16130_c0_g3_i4	1	p4	(TTCT)5	20	957	976
	TRINITY_DN16169_c0_g2_i2	1	p1	(A)10	10	1094	1103
	TRINITY_DN16169_c0_g2_i6	1	p1	(T)10	10	1702	1711
	TRINITY_DN16169_c1_g1_i2	1	p2	(CA)10	20	42	61
	TRINITY_DN16115_c0_g1_i11	1	p2	(TC)17	34	190	223
	TRINITY_DN16115_c0_g1_i7	1	p2	(TC)17	34	190	223
	TRINITY_DN16115_c0_g1_i14	1	p2	(TC)17	34	190	223
	TRINITY_DN16115_c0_g1_i17	1	p2	(TC)17	34	190	223
	TRINITY_DN16115_c0_g1_i16	1	p2	(TC)17	34	190	223
	TRINITY_DN16115_c0_g1_i13	1	p2	(TC)17	34	190	223
	TRINITY_DN16128_c0_g1_i15	1	p3	(GGA)6	18	207	224
	TRINITY_DN16128_c0_g1_i8	1	p3	(GGA)5	15	231	245
	TRINITY_DN16128_c0_g1_i14	1	c	(GGA)6cgcgtacgaggacgagat(GGA)6	54	207	260
	TRINITY_DN16128_c0_g1_i16	1	p3	(GGA)5	15	231	245
	TRINITY_DN16128_c0_g1_i5	1	c	(GGA)6cgcgtacgaggacgagat(GGA)6	54	207	260
	TRINITY_DN16128_c0_g1_i6	1	p3	(GGA)5	15	231	245
	TRINITY_DN16128_c0_g1_i1	1	p3	(GGA)5	15	231	245
	TRINITY_DN16128_c0_g1_i7	1	p3	(GGA)5	15	231	245
	TRINITY_DN16106_c1_g1_i2	1	p1	(A)12	12	1677	1688
	TRINITY_DN16106_c1_g1_i6	1	p1	(A)12	12	1677	1688
	TRINITY_DN16106_c1_g1_i1	1	p1	(A)12	12	1425	1436
	TRINITY_DN16106_c1_g1_i5	1	p1	(A)12	12	1484	1495
	TRINITY_DN16161_c0_g1_i6	1	p3	(GCA)7	21	364	384
	TRINITY_DN16161_c0_g1_i2	1	p3	(GCA)7	21	410	430
	TRINITY_DN16161_c0_g1_i3	1	p3	(GCA)7	21	410	430
	TRINITY_DN16197_c0_g1_i18	1	p1	(T)10	10	1380	1389
	TRINITY_DN16197_c0_g1_i8	1	p1	(T)10	10	1015	1024
	TRINITY_DN16197_c0_g1_i19	1	p1	(T)10	10	1015	1024
	TRINITY_DN94812_c0_g1_i1	1	c	(A)10tccctttccg(CA)11	42	125	166
	TRINITY_DN94800_c0_g1_i1	1	p1	(A)10	10	73	82
	TRINITY_DN94871_c0_g4_i1	1	p4	(TTTG)6	24	653	676
	TRINITY_DN94871_c0_g4_i2	1	p4	(TTTG)6	24	259	282
	TRINITY_DN94871_c0_g5_i1	1	p3	(AGG)5	15	205	219
	TRINITY_DN93836_c0_g1_i1	1	p3	(CGC)6	18	296	313
	TRINITY_DN93823_c0_g1_i2	1	p3	(AGC)5	15	675	689
	TRINITY_DN93823_c0_g1_i7	1	p3	(AGC)5	15	675	689
	TRINITY_DN93823_c0_g1_i1	1	p3	(AGC)5	15	675	689
	TRINITY_DN93823_c0_g1_i4	1	p3	(AGC)5	15	675	689
	TRINITY_DN93899_c2_g2_i3	1	p3	(AAC)5	15	190	204
	TRINITY_DN93899_c2_g4_i1	1	p3	(TTG)5	15	435	449
	TRINITY_DN93892_c1_g2_i1	1	p2	(GT)17	34	449	482
	TRINITY_DN93892_c1_g2_i2	1	p2	(GT)17	34	567	600
	TRINITY_DN93884_c0_g3_i1	1	p2	(TG)8	16	51	66
	TRINITY_DN93868_c0_g1_i2	1	p2	(TG)7	14	505	518
	TRINITY_DN93817_c0_g1_i1	1	p3	(GAG)5	15	181	195
	TRINITY_DN82938_c0_g1_i1	1	p2	(AT)6	12	616	627
	TRINITY_DN82970_c0_g1_i4	1	p1	(A)12	12	1758	1769
	TRINITY_DN82970_c0_g1_i5	1	p1	(A)12	12	905	916
	TRINITY_DN82970_c0_g1_i2	1	p1	(A)12	12	1745	1756
	TRINITY_DN82970_c0_g1_i1	1	p1	(A)12	12	1749	1760
	TRINITY_DN82945_c0_g1_i1	1	p2	(GT)6	12	395	406
	TRINITY_DN82957_c1_g1_i1	1	p3	(GCA)5	15	50	64
	TRINITY_DN49695_c0_g1_i1	1	p5	(TCTTT)5	25	411	435
	TRINITY_DN49653_c0_g1_i7	1	p3	(TCT)5	15	491	505
	TRINITY_DN49690_c1_g1_i1	1	p3	(GGA)5	15	387	401
	TRINITY_DN49670_c0_g1_i3	1	p2	(GA)10	20	58	77
	TRINITY_DN49640_c0_g1_i14	1	p1	(T)10	10	3817	3826
	TRINITY_DN49640_c0_g1_i13	1	p1	(T)10	10	3936	3945
	TRINITY_DN49640_c0_g1_i5	1	p1	(T)10	10	3986	3995
	TRINITY_DN49640_c0_g1_i11	1	p1	(T)10	10	3858	3867
	TRINITY_DN49608_c0_g1_i1	1	p1	(T)12	12	564	575
	TRINITY_DN49694_c0_g1_i1	1	p3	(CGC)6	18	298	315
	TRINITY_DN49694_c0_g1_i2	1	p3	(CGC)5	15	250	264
	TRINITY_DN49677_c0_g1_i1	1	p1	(T)11	11	196	206
	TRINITY_DN49693_c0_g1_i1	1	p3	(CCT)5	15	55	69
	TRINITY_DN49699_c0_g1_i2	1	p1	(T)11	11	451	461
	TRINITY_DN49644_c0_g2_i1	1	p1	(T)10	10	209	218
	TRINITY_DN49645_c0_g1_i2	1	p2	(CA)10	20	118	137
	TRINITY_DN74433_c0_g1_i1	1	p3	(CGC)6	18	29	46
	TRINITY_DN74473_c1_g1_i2	1	p4	(GATG)6	24	213	236
	TRINITY_DN74468_c0_g2_i1	1	p3	(ACA)7	21	165	185
	TRINITY_DN74454_c0_g1_i1	1	p3	(AGG)6	18	722	739
	TRINITY_DN74456_c0_g1_i4	1	c	(ACA)7atc(ACA)7atc(ACA)6acc(ACA)7	90	4	93
	TRINITY_DN74438_c0_g1_i1	1	p1	(T)10	10	18	27
	TRINITY_DN74461_c1_g1_i1	1	p1	(T)10	10	149	158
	TRINITY_DN74418_c0_g1_i1	1	p3	(GGC)6	18	192	209
	TRINITY_DN74418_c0_g2_i1	1	p3	(CCT)5	15	213	227
	TRINITY_DN77461_c0_g1_i2	1	p3	(CCG)5	15	115	129
	TRINITY_DN77460_c0_g1_i2	1	p2	(CA)6	12	378	389
	TRINITY_DN77409_c0_g3_i2	1	p2	(TC)7	14	141	154
	TRINITY_DN77499_c0_g1_i2	1	p1	(T)11	11	120	130
	TRINITY_DN77412_c0_g1_i1	1	p2	(CT)7	14	332	345
	TRINITY_DN77412_c0_g1_i4	1	p2	(CT)7	14	332	345
	TRINITY_DN77412_c0_g1_i4	2	p1	(T)10	10	1056	1065
	TRINITY_DN77412_c0_g1_i2	1	p2	(CT)7	14	271	284
	TRINITY_DN77412_c0_g1_i2	2	p1	(T)10	10	995	1004
	TRINITY_DN77412_c0_g1_i3	1	p2	(CT)7	14	271	284
	TRINITY_DN77447_c0_g1_i2	1	p3	(CAA)6	18	132	149
	TRINITY_DN77452_c0_g1_i1	1	p1	(A)11	11	245	255
	TRINITY_DN77452_c0_g1_i3	1	p1	(A)10	10	248	257
	TRINITY_DN77452_c0_g1_i2	1	p1	(A)11	11	245	255
	TRINITY_DN77452_c0_g1_i5	1	p1	(A)10	10	248	257
	TRINITY_DN77452_c0_g1_i4	1	p1	(A)10	10	248	257
	TRINITY_DN87824_c0_g1_i1	1	p3	(CGC)5	15	108	122
	TRINITY_DN87856_c0_g1_i1	1	p3	(TCA)5	15	91	105
	TRINITY_DN87860_c0_g1_i1	1	p1	(A)10	10	287	296
	TRINITY_DN87848_c0_g1_i1	1	p3	(CTT)5	15	54	68
	TRINITY_DN87812_c0_g2_i1	1	p1	(T)10	10	31	40
	TRINITY_DN87840_c0_g1_i2	1	p1	(A)10	10	400	409
	TRINITY_DN87851_c1_g1_i1	1	p3	(TTG)9	27	380	406
	TRINITY_DN87851_c2_g1_i1	1	p3	(GTT)7	21	100	120
	TRINITY_DN87851_c2_g2_i1	1	p3	(TTG)5	15	142	156
	TRINITY_DN87851_c2_g3_i1	1	p3	(TCT)5	15	243	257
	TRINITY_DN87851_c2_g3_i2	1	p3	(TCT)5	15	243	257
	TRINITY_DN87865_c0_g1_i1	1	p1	(T)10	10	145	154
	TRINITY_DN58071_c0_g1_i2	1	p3	(GAC)7	21	482	502
	TRINITY_DN58071_c0_g1_i4	1	p3	(GAC)7	21	482	502
	TRINITY_DN58010_c2_g1_i1	1	p3	(CTC)6	18	18	35
	TRINITY_DN58027_c0_g1_i1	1	p3	(CGA)5	15	128	142
	TRINITY_DN58026_c1_g1_i5	1	p2	(GA)6	12	153	164
	TRINITY_DN58072_c0_g1_i3	1	p3	(TCG)5	15	295	309
	TRINITY_DN58072_c0_g1_i7	1	p3	(TCG)5	15	397	411
	TRINITY_DN58072_c0_g1_i5	1	p3	(TCG)5	15	287	301
	TRINITY_DN58072_c1_g1_i2	1	p3	(CGA)5	15	192	206
	TRINITY_DN58064_c0_g2_i1	1	p3	(ATG)5	15	113	127
	TRINITY_DN58086_c1_g3_i1	1	p1	(T)10	10	823	832
	TRINITY_DN58092_c0_g1_i2	1	p2	(TG)6	12	613	624
	TRINITY_DN58054_c0_g1_i2	1	p3	(TGA)5	15	1624	1638
	TRINITY_DN58068_c0_g1_i4	1	p5	(CCTCT)5	25	161	185
	TRINITY_DN58068_c0_g1_i3	1	p1	(C)27	27	233	259
	TRINITY_DN58047_c0_g1_i3	1	p2	(AT)6	12	1200	1211
	TRINITY_DN58047_c0_g1_i8	1	p2	(AT)6	12	1768	1779
	TRINITY_DN58079_c0_g1_i1	1	p3	(CCT)5	15	548	562
	TRINITY_DN58019_c1_g1_i1	1	p3	(AAG)12	36	27	62
	TRINITY_DN58019_c1_g1_i2	1	p3	(AAG)12	36	27	62
	TRINITY_DN2426_c0_g1_i1	1	p2	(GA)9	18	775	792
	TRINITY_DN2426_c0_g1_i4	1	p2	(GA)6	12	154	165
	TRINITY_DN2426_c0_g2_i2	1	p2	(CA)6	12	553	564
	TRINITY_DN2426_c0_g2_i1	1	p2	(TC)6	12	542	553
	TRINITY_DN2404_c1_g2_i2	1	p1	(A)22	22	56	77
	TRINITY_DN2404_c1_g2_i7	1	p1	(A)30	30	48	77
	TRINITY_DN2468_c0_g1_i3	1	p3	(GCA)5	15	632	646
	TRINITY_DN2468_c0_g1_i11	1	p3	(GCA)5	15	632	646
	TRINITY_DN2468_c0_g1_i5	1	p3	(GCA)5	15	602	616
	TRINITY_DN2468_c0_g1_i9	1	p3	(GCA)5	15	632	646
	TRINITY_DN2468_c0_g1_i7	1	p3	(GCA)5	15	602	616
	TRINITY_DN2468_c0_g1_i10	1	p3	(GCA)5	15	605	619
	TRINITY_DN2468_c0_g1_i12	1	p3	(GCA)5	15	605	619
	TRINITY_DN2468_c0_g1_i1	1	p3	(GCA)5	15	632	646
	TRINITY_DN2468_c0_g1_i4	1	p3	(GCA)5	15	602	616
	TRINITY_DN2468_c0_g1_i6	1	p3	(GCA)5	15	605	619
	TRINITY_DN2418_c0_g2_i2	1	p3	(TTC)5	15	647	661
	TRINITY_DN2418_c0_g2_i2	2	p2	(CT)8	16	947	962
	TRINITY_DN2418_c0_g2_i6	1	p3	(TTC)5	15	632	646
	TRINITY_DN2418_c0_g2_i6	2	p2	(CT)8	16	914	929
	TRINITY_DN2418_c0_g2_i3	1	p3	(TTC)5	15	647	661
	TRINITY_DN2418_c0_g2_i3	2	p2	(CT)8	16	929	944
	TRINITY_DN2490_c0_g1_i10	1	p2	(CT)7	14	18	31
	TRINITY_DN2490_c0_g1_i6	1	p2	(CT)7	14	18	31
	TRINITY_DN2490_c0_g1_i1	1	p2	(CT)7	14	18	31
	TRINITY_DN2447_c0_g3_i1	1	p3	(GCC)6	18	112	129
	TRINITY_DN2447_c1_g1_i2	1	p1	(A)10	10	1561	1570
	TRINITY_DN2406_c0_g1_i1	1	p4	(AGAA)5	20	59	78
	TRINITY_DN2406_c0_g1_i6	1	p4	(AGAA)5	20	59	78
	TRINITY_DN2406_c1_g2_i1	1	p4	(GAAA)6	24	25	48
	TRINITY_DN2406_c2_g1_i2	1	p4	(AAAG)8	32	1638	1669
	TRINITY_DN2406_c2_g1_i1	1	p1	(A)10	10	1505	1514
	TRINITY_DN2406_c2_g1_i1	2	p4	(AAAG)8	32	3076	3107
	TRINITY_DN2402_c0_g1_i2	1	c	(CCT)6aggtaccactactatagataatttcttgctcatcttcttccagttcctctatcatataccgtatacggatacggagaactaaattgtaccctccaattc(A)10	127	846	972
	TRINITY_DN2402_c0_g1_i4	1	p1	(A)10	10	974	983
	TRINITY_DN2402_c0_g1_i1	1	p3	(CCT)6	18	846	863
	TRINITY_DN2402_c0_g1_i3	1	p1	(A)10	10	966	975
	TRINITY_DN2402_c0_g1_i5	1	p3	(CCT)6	18	857	874
	TRINITY_DN2402_c1_g1_i1	1	p2	(CG)6	12	227	238
	TRINITY_DN2434_c0_g1_i7	1	p3	(CTC)7	21	99	119
	TRINITY_DN2434_c0_g1_i6	1	p5	(CCTCT)5	25	46	70
	TRINITY_DN2434_c0_g1_i4	1	p5	(CCTCT)5	25	46	70
	TRINITY_DN2434_c0_g1_i9	1	p5	(CCTCT)5	25	46	70
	TRINITY_DN2455_c0_g1_i6	1	p3	(GAG)8	24	1500	1523
	TRINITY_DN2455_c0_g1_i10	1	p3	(GAG)5	15	1514	1528
	TRINITY_DN2455_c0_g1_i4	1	p3	(GAG)5	15	1500	1514
	TRINITY_DN2455_c0_g1_i1	1	p3	(GAG)8	24	1514	1537
	TRINITY_DN2455_c0_g1_i3	1	p3	(GAG)5	15	1287	1301
	TRINITY_DN2455_c1_g1_i10	1	p3	(AGG)7	21	46	66
	TRINITY_DN2455_c1_g1_i5	1	p3	(AGG)7	21	46	66
	TRINITY_DN2455_c1_g1_i5	2	p2	(TG)6	12	1599	1610
	TRINITY_DN2455_c1_g1_i9	1	p3	(GGA)5	15	53	67
	TRINITY_DN2455_c1_g1_i1	1	p3	(AGG)7	21	46	66
	TRINITY_DN2455_c1_g1_i7	1	p3	(AGG)7	21	46	66
	TRINITY_DN2455_c1_g1_i11	1	p3	(AGG)7	21	46	66
	TRINITY_DN2455_c1_g1_i11	2	p2	(TG)6	12	1599	1610
	TRINITY_DN2455_c1_g1_i8	1	p3	(AGG)7	21	46	66
	TRINITY_DN2455_c1_g1_i8	2	c	(TG)8tatgtaaataa(GAG)5	42	1567	1608
	TRINITY_DN2479_c0_g1_i1	1	p1	(T)10	10	3526	3535
	TRINITY_DN2422_c0_g1_i4	1	p3	(TCC)5	15	123	137
	TRINITY_DN2422_c0_g1_i11	1	p3	(TCC)5	15	123	137
	TRINITY_DN2422_c0_g1_i5	1	p3	(TCC)5	15	123	137
	TRINITY_DN2422_c0_g1_i12	1	p3	(TCC)5	15	123	137
	TRINITY_DN2422_c0_g1_i1	1	p3	(TCC)5	15	123	137
	TRINITY_DN2422_c0_g1_i10	1	p3	(TCC)5	15	123	137
	TRINITY_DN2463_c0_g1_i11	1	p3	(CTC)5	15	210	224
	TRINITY_DN2463_c0_g1_i6	1	p3	(CTC)5	15	218	232
	TRINITY_DN2463_c0_g1_i5	1	p3	(CTC)5	15	210	224
	TRINITY_DN2463_c0_g1_i9	1	p3	(CTC)5	15	218	232
	TRINITY_DN2463_c0_g1_i4	1	p3	(CTC)5	15	218	232
	TRINITY_DN2469_c0_g1_i6	1	p3	(GCC)6	18	200	217
	TRINITY_DN2469_c0_g1_i5	1	p3	(GCC)6	18	200	217
	TRINITY_DN2469_c0_g1_i11	1	p3	(GCC)6	18	200	217
	TRINITY_DN2469_c0_g1_i11	2	p1	(A)10	10	2123	2132
	TRINITY_DN2469_c0_g1_i18	1	p3	(GCC)6	18	200	217
	TRINITY_DN2469_c0_g1_i2	1	p1	(A)10	10	1577	1586
	TRINITY_DN2469_c0_g1_i7	1	p3	(GCC)6	18	200	217
	TRINITY_DN2469_c0_g1_i7	2	p1	(A)10	10	2195	2204
	TRINITY_DN2469_c0_g1_i16	1	p1	(T)10	10	372	381
	TRINITY_DN2469_c0_g1_i9	1	p3	(GCC)6	18	200	217
	TRINITY_DN2469_c0_g1_i14	1	p3	(GCC)6	18	200	217
	TRINITY_DN2469_c0_g1_i13	1	p1	(T)10	10	372	381
	TRINITY_DN2469_c0_g1_i3	1	p3	(GCC)6	18	200	217
	TRINITY_DN2498_c0_g1_i7	1	p1	(A)12	12	1230	1241
	TRINITY_DN2498_c0_g1_i1	1	p1	(A)12	12	1232	1243
	TRINITY_DN2465_c0_g1_i1	1	p3	(CGG)5	15	59	73
	TRINITY_DN2465_c0_g1_i2	1	p3	(CGG)5	15	59	73
	TRINITY_DN2430_c0_g1_i6	1	p3	(GGC)5	15	176	190
	TRINITY_DN2436_c0_g1_i5	1	p3	(GCC)5	15	338	352
	TRINITY_DN2436_c0_g1_i8	1	p1	(A)10	10	685	694
	TRINITY_DN2436_c0_g1_i9	1	p3	(GCC)5	15	268	282
	TRINITY_DN2436_c2_g1_i1	1	p3	(CCT)5	15	233	247
	TRINITY_DN2436_c2_g1_i3	1	p3	(CCT)5	15	233	247
	TRINITY_DN2436_c2_g1_i2	1	p3	(CCT)5	15	233	247
	TRINITY_DN2440_c0_g1_i4	1	p1	(T)10	10	1271	1280
	TRINITY_DN2440_c0_g1_i1	1	p1	(T)10	10	895	904
	TRINITY_DN2440_c0_g2_i1	1	p3	(TTG)8	24	987	1010
	TRINITY_DN2440_c0_g2_i3	1	p3	(TTG)5	15	1071	1085
	TRINITY_DN2488_c0_g1_i1	1	p3	(CTC)5	15	21	35
	TRINITY_DN2486_c1_g2_i4	1	p3	(GGA)5	15	239	253
	TRINITY_DN2486_c1_g2_i3	1	p3	(GGA)5	15	239	253
	TRINITY_DN2486_c1_g2_i1	1	p3	(GGA)5	15	239	253
	TRINITY_DN2486_c1_g2_i2	1	p3	(GGA)5	15	239	253
	TRINITY_DN2415_c0_g1_i8	1	p1	(T)10	10	83	92
	TRINITY_DN2415_c0_g1_i9	1	p1	(T)10	10	83	92
	TRINITY_DN2415_c0_g1_i2	1	p1	(T)10	10	2033	2042
	TRINITY_DN2415_c0_g1_i5	1	p1	(T)10	10	2033	2042
	TRINITY_DN2421_c0_g1_i2	1	p3	(CCG)8	24	69	92
	TRINITY_DN2421_c0_g1_i6	1	p3	(CCG)8	24	69	92
	TRINITY_DN2421_c0_g1_i5	1	p3	(CCG)5	15	35	49
	TRINITY_DN2421_c0_g1_i3	1	p3	(CCG)5	15	35	49
	TRINITY_DN2438_c0_g1_i1	1	p1	(T)20	20	621	640
	TRINITY_DN2438_c0_g1_i8	1	p1	(T)20	20	638	657
	TRINITY_DN2438_c0_g1_i2	1	p2	(AC)6	12	112	123
	TRINITY_DN2438_c0_g1_i4	1	p2	(AC)6	12	112	123
	TRINITY_DN2449_c0_g1_i1	1	p3	(CTC)5	15	41	55
	TRINITY_DN2449_c0_g1_i3	1	p3	(CTC)5	15	41	55
	TRINITY_DN2449_c0_g1_i4	1	p3	(CTC)5	15	41	55
	TRINITY_DN2449_c0_g1_i5	1	p3	(CTC)5	15	41	55
	TRINITY_DN2449_c0_g1_i8	1	p3	(CTC)5	15	41	55
	TRINITY_DN2449_c0_g1_i7	1	p3	(CTC)5	15	41	55
	TRINITY_DN2431_c0_g2_i3	1	p3	(AGC)5	15	126	140
	TRINITY_DN2431_c0_g2_i4	1	p3	(AGC)5	15	126	140
	TRINITY_DN2456_c0_g1_i5	1	p1	(T)10	10	1757	1766
	TRINITY_DN2456_c0_g1_i6	1	p1	(T)10	10	1757	1766
	TRINITY_DN2405_c0_g1_i3	1	p2	(GT)6	12	4607	4618
	TRINITY_DN2405_c0_g1_i1	1	p2	(GT)6	12	4355	4366
	TRINITY_DN2405_c0_g2_i3	1	p2	(TG)6	12	3977	3988
	TRINITY_DN2405_c0_g2_i4	1	p2	(TG)6	12	3977	3988
	TRINITY_DN2405_c0_g2_i2	1	p2	(TG)6	12	3977	3988
	TRINITY_DN2453_c0_g2_i2	1	p3	(CCG)7	21	39	59
	TRINITY_DN2453_c0_g2_i2	2	p3	(CGG)5	15	316	330
	TRINITY_DN2453_c0_g2_i1	1	p3	(CCG)7	21	39	59
	TRINITY_DN2453_c0_g2_i4	1	p3	(CCG)7	21	39	59
	TRINITY_DN2453_c0_g2_i4	2	p3	(CGG)5	15	316	330
	TRINITY_DN2444_c0_g1_i6	1	c	(T)10aga(T)11	24	379	402
	TRINITY_DN2444_c1_g1_i5	1	p3	(AAG)8	24	1250	1273
	TRINITY_DN2475_c0_g1_i5	1	p2	(CT)6	12	1350	1361
	TRINITY_DN2475_c0_g1_i13	1	p2	(CT)6	12	1242	1253
	TRINITY_DN2475_c0_g1_i1	1	p2	(CT)11	22	1252	1273
	TRINITY_DN2475_c0_g1_i14	1	p2	(CT)11	22	1360	1381
	TRINITY_DN2425_c0_g2_i3	1	p3	(GGA)5	15	237	251
	TRINITY_DN2425_c0_g2_i2	1	p3	(GGA)5	15	237	251
	TRINITY_DN2425_c0_g2_i1	1	p3	(GGA)5	15	237	251
	TRINITY_DN2476_c1_g1_i5	1	p1	(A)10	10	223	232
	TRINITY_DN2476_c1_g1_i3	1	p1	(A)10	10	223	232
	TRINITY_DN2483_c0_g1_i10	1	p2	(TC)8	16	1982	1997
	TRINITY_DN2483_c0_g1_i6	1	p2	(TC)8	16	2103	2118
	TRINITY_DN2408_c0_g1_i11	1	p1	(T)10	10	520	529
	TRINITY_DN2480_c1_g1_i1	1	p2	(CT)8	16	66	81
	TRINITY_DN2480_c1_g1_i2	1	p2	(CT)8	16	66	81
	TRINITY_DN2450_c0_g1_i1	1	p3	(TAC)5	15	1530	1544
	TRINITY_DN2450_c0_g1_i4	1	p4	(AGTC)5	20	1570	1589
	TRINITY_DN2414_c0_g1_i4	1	p3	(CGC)6	18	125	142
	TRINITY_DN2414_c0_g1_i2	1	p3	(CGC)6	18	125	142
	TRINITY_DN2414_c0_g1_i1	1	p3	(CGC)6	18	120	137
	TRINITY_DN2414_c0_g1_i3	1	p3	(CGC)6	18	120	137
	TRINITY_DN2414_c1_g1_i1	1	p1	(T)11	11	310	320
	TRINITY_DN2414_c1_g1_i18	1	p1	(T)11	11	310	320
	TRINITY_DN2414_c1_g1_i2	1	p1	(T)11	11	310	320
	TRINITY_DN2414_c1_g1_i6	1	p3	(GCC)7	21	30	50
	TRINITY_DN2414_c1_g1_i12	1	p3	(GCC)7	21	30	50
	TRINITY_DN2446_c0_g1_i5	1	p4	(GATG)5	20	196	215
	TRINITY_DN2446_c0_g1_i3	1	p4	(GATG)5	20	695	714
	TRINITY_DN2446_c0_g1_i6	1	p4	(GATG)5	20	399	418
	TRINITY_DN2446_c0_g1_i6	2	p2	(AG)7	14	557	570
	TRINITY_DN2446_c0_g1_i4	1	p2	(AG)7	14	355	368
	TRINITY_DN2446_c1_g1_i7	1	p3	(TCT)5	15	197	211
	TRINITY_DN2446_c1_g1_i3	1	p3	(TCT)5	15	197	211
	TRINITY_DN2446_c1_g1_i5	1	p3	(TCT)5	15	197	211
	TRINITY_DN2412_c0_g1_i5	1	p2	(TC)6	12	156	167
	TRINITY_DN2412_c0_g1_i5	2	p2	(GA)6	12	5726	5737
	TRINITY_DN2412_c0_g1_i4	1	p2	(TC)6	12	156	167
	TRINITY_DN2412_c0_g1_i2	1	p2	(TC)6	12	156	167
	TRINITY_DN2412_c0_g1_i3	1	p2	(TC)6	12	156	167
	TRINITY_DN2427_c0_g1_i3	1	p3	(CGT)5	15	834	848
	TRINITY_DN2427_c1_g1_i3	1	p3	(CCT)6	18	151	168
	TRINITY_DN2427_c1_g1_i7	1	p3	(CCT)6	18	151	168
	TRINITY_DN2427_c1_g1_i5	1	p3	(CCT)6	18	151	168
	TRINITY_DN2427_c1_g1_i9	1	p3	(CCT)6	18	151	168
	TRINITY_DN2427_c1_g1_i8	1	p3	(CCT)6	18	151	168
	TRINITY_DN2484_c0_g1_i5	1	p1	(A)11	11	708	718
	TRINITY_DN2474_c0_g1_i3	1	p2	(AG)13	26	13	38
	TRINITY_DN2474_c0_g1_i2	1	p2	(AG)13	26	13	38
	TRINITY_DN2474_c0_g1_i7	1	p1	(T)13	13	836	848
	TRINITY_DN2461_c0_g1_i1	1	p3	(GGA)5	15	1730	1744
	TRINITY_DN2461_c0_g1_i7	1	p3	(GGA)5	15	1449	1463
	TRINITY_DN2461_c0_g1_i9	1	p3	(GGA)5	15	1449	1463
	TRINITY_DN2461_c0_g1_i8	1	p3	(GGA)6	18	1449	1466
	TRINITY_DN2461_c0_g1_i3	1	p3	(GGA)6	18	1449	1466
	TRINITY_DN2461_c0_g1_i5	1	c	(TCC)6(ACC)5	33	52	84
	TRINITY_DN596_c0_g1_i1	1	c	(CAT)6cgttcatagattggcacattcatccttgtattgaagttgatatcacctc(CAT)6	85	5625	5709
	TRINITY_DN596_c0_g1_i2	1	p3	(CAT)6	18	5691	5708
	TRINITY_DN596_c0_g1_i6	1	p3	(CAT)6	18	5691	5708
	TRINITY_DN596_c0_g1_i6	2	p2	(TG)9	18	7289	7306
	TRINITY_DN596_c0_g1_i3	1	p3	(CAT)6	18	5691	5708
	TRINITY_DN596_c0_g1_i3	2	p2	(TG)9	18	7313	7330
	TRINITY_DN549_c0_g1_i6	1	p3	(GTC)5	15	1253	1267
	TRINITY_DN549_c0_g1_i8	1	p3	(GTC)5	15	1253	1267
	TRINITY_DN549_c0_g1_i9	1	p3	(GTC)5	15	1173	1187
	TRINITY_DN549_c0_g1_i5	1	p3	(GTC)5	15	1400	1414
	TRINITY_DN523_c0_g1_i4	1	c	(TCCT)5tccgtccgtcctcactcccctcctcctcctcccggcgatcgcagagaatt(CGC)5	85	132	216
	TRINITY_DN523_c0_g1_i5	1	c	(TCCT)5tccgtccgtcctcactcccctcctcctcctcccggcgatcgcagagaatt(CGC)5	85	132	216
	TRINITY_DN561_c0_g1_i2	1	p3	(AGG)5	15	137	151
	TRINITY_DN561_c0_g1_i7	1	p3	(AGG)5	15	137	151
	TRINITY_DN561_c0_g1_i7	2	p3	(GCT)6	18	2011	2028
	TRINITY_DN561_c0_g1_i5	1	p3	(AGG)5	15	137	151
	TRINITY_DN561_c0_g1_i6	1	p3	(AGG)5	15	137	151
	TRINITY_DN561_c0_g1_i6	2	p3	(TGC)5	15	1804	1818
	TRINITY_DN561_c0_g1_i6	3	p3	(GCT)6	18	2004	2021
	TRINITY_DN561_c0_g1_i1	1	p3	(AGG)5	15	137	151
	TRINITY_DN561_c0_g1_i1	2	p3	(GCT)6	18	2004	2021
	TRINITY_DN561_c2_g1_i1	1	p3	(TGC)5	15	53	67
	TRINITY_DN538_c0_g1_i2	1	p4	(AGGA)5	20	2821	2840
	TRINITY_DN538_c0_g1_i3	1	p4	(AGGA)5	20	2813	2832
	TRINITY_DN586_c1_g1_i10	1	p3	(GCG)5	15	208	222
	TRINITY_DN586_c1_g1_i12	1	p3	(GCG)5	15	208	222
	TRINITY_DN586_c1_g1_i6	1	p3	(GCG)5	15	208	222
	TRINITY_DN586_c1_g1_i5	1	p3	(GCG)7	21	27	47
	TRINITY_DN530_c0_g1_i7	1	p3	(CGC)5	15	132	146
	TRINITY_DN530_c0_g1_i1	1	p3	(CGC)5	15	132	146
	TRINITY_DN530_c0_g1_i8	1	p3	(CGC)5	15	132	146
	TRINITY_DN530_c0_g1_i2	1	p3	(CGC)5	15	132	146
	TRINITY_DN530_c0_g1_i5	1	p3	(CGC)5	15	132	146
	TRINITY_DN569_c0_g1_i3	1	p4	(AAGC)6	24	360	383
	TRINITY_DN569_c0_g1_i5	1	p4	(AAGC)6	24	360	383
	TRINITY_DN569_c0_g1_i2	1	p4	(AAGC)6	24	360	383
	TRINITY_DN569_c0_g1_i7	1	p4	(AAGC)6	24	360	383
	TRINITY_DN507_c0_g1_i5	1	p3	(TGT)7	21	1188	1208
	TRINITY_DN507_c0_g1_i7	1	p3	(GAC)6	18	1955	1972
	TRINITY_DN507_c0_g1_i6	1	p3	(TGT)7	21	1187	1207
	TRINITY_DN507_c0_g1_i2	1	p3	(TGT)7	21	1188	1208
	TRINITY_DN507_c0_g1_i8	1	p3	(TGT)7	21	1187	1207
	TRINITY_DN507_c0_g1_i9	1	p3	(TGT)7	21	1184	1204
	TRINITY_DN550_c0_g1_i8	1	p3	(GAG)5	15	163	177
	TRINITY_DN550_c0_g1_i3	1	p3	(GAG)5	15	163	177
	TRINITY_DN540_c0_g1_i11	1	p2	(TG)8	16	1758	1773
	TRINITY_DN540_c0_g1_i8	1	p2	(TG)8	16	1758	1773
	TRINITY_DN582_c0_g1_i5	1	p3	(AGC)5	15	277	291
	TRINITY_DN582_c0_g1_i6	1	p3	(AGC)5	15	291	305
	TRINITY_DN582_c0_g1_i2	1	p3	(AGC)5	15	291	305
	TRINITY_DN582_c0_g1_i3	1	p3	(AGC)5	15	277	291
	TRINITY_DN582_c1_g1_i5	1	p1	(T)10	10	1037	1046
	TRINITY_DN518_c0_g1_i6	1	p3	(GCG)5	15	224	238
	TRINITY_DN518_c0_g1_i6	2	p3	(CCT)5	15	568	582
	TRINITY_DN518_c0_g1_i4	1	p3	(GCG)6	18	217	234
	TRINITY_DN518_c0_g1_i5	1	p3	(GCG)6	18	217	234
	TRINITY_DN518_c0_g1_i7	1	p3	(GCG)5	15	224	238
	TRINITY_DN518_c0_g1_i10	1	p3	(GCG)5	15	224	238
	TRINITY_DN518_c0_g1_i8	1	p3	(GCG)6	18	219	236
	TRINITY_DN518_c0_g1_i3	1	p3	(GCG)6	18	217	234
	TRINITY_DN518_c0_g1_i3	2	p3	(CCT)5	15	564	578
	TRINITY_DN577_c0_g1_i1	1	p3	(CCG)5	15	257	271
	TRINITY_DN577_c0_g1_i4	1	p3	(CCG)5	15	257	271
	TRINITY_DN577_c0_g1_i5	1	p3	(CCG)5	15	257	271
	TRINITY_DN597_c0_g2_i2	1	p4	(ATGG)5	20	404	423
	TRINITY_DN597_c0_g2_i4	1	p4	(ATGG)5	20	404	423
	TRINITY_DN597_c0_g2_i1	1	p4	(ATGG)5	20	404	423
	TRINITY_DN597_c0_g3_i4	1	p2	(TG)8	16	1517	1532
	TRINITY_DN597_c0_g3_i4	2	p2	(TA)7	14	1921	1934
	TRINITY_DN597_c0_g3_i5	1	p2	(TG)8	16	895	910
	TRINITY_DN597_c0_g3_i2	1	p2	(TG)8	16	517	532
	TRINITY_DN597_c1_g1_i5	1	p3	(GCG)5	15	160	174
	TRINITY_DN597_c1_g1_i8	1	p3	(GCG)6	18	160	177
	TRINITY_DN516_c0_g1_i2	1	p1	(T)11	11	711	721
	TRINITY_DN570_c0_g1_i2	1	p2	(CT)6	12	1152	1163
	TRINITY_DN570_c0_g1_i1	1	p2	(CT)6	12	695	706
	TRINITY_DN579_c0_g1_i12	1	p3	(AGC)6	18	433	450
	TRINITY_DN579_c0_g1_i4	1	p3	(GAG)6	18	55	72
	TRINITY_DN579_c0_g1_i4	2	p3	(AGC)6	18	651	668
	TRINITY_DN579_c0_g1_i1	1	p3	(GAG)6	18	55	72
	TRINITY_DN579_c0_g1_i1	2	p3	(AGC)6	18	552	569
	TRINITY_DN579_c0_g1_i8	1	p3	(GAG)6	18	55	72
	TRINITY_DN579_c0_g1_i8	2	p3	(AGC)6	18	651	668
	TRINITY_DN579_c0_g1_i11	1	p3	(GAG)6	18	55	72
	TRINITY_DN579_c0_g1_i11	2	p3	(AGC)6	18	651	668
	TRINITY_DN579_c0_g1_i3	1	p3	(AGC)6	18	339	356
	TRINITY_DN579_c0_g1_i5	1	p3	(AGC)6	18	433	450
	TRINITY_DN579_c0_g1_i2	1	p3	(AGC)6	18	339	356
	TRINITY_DN579_c0_g1_i9	1	p3	(AGC)6	18	339	356
	TRINITY_DN579_c1_g1_i1	1	p2	(GA)6	12	98	109
	TRINITY_DN579_c1_g1_i2	1	p2	(GA)6	12	98	109
	TRINITY_DN581_c0_g1_i2	1	p3	(TGT)12	36	3970	4005
	TRINITY_DN581_c0_g1_i7	1	p3	(TGT)12	36	3970	4005
	TRINITY_DN581_c0_g1_i5	1	p3	(TGT)12	36	3966	4001
	TRINITY_DN581_c0_g1_i1	1	p3	(TGT)11	33	3967	3999
	TRINITY_DN521_c0_g2_i1	1	p3	(TTG)5	15	745	759
	TRINITY_DN547_c1_g1_i3	1	p3	(CAC)6	18	81	98
	TRINITY_DN547_c1_g1_i1	1	p3	(CTT)5	15	214	228
	TRINITY_DN587_c0_g1_i4	1	p1	(A)10	10	1562	1571
	TRINITY_DN587_c0_g1_i2	1	p1	(A)10	10	1585	1594
	TRINITY_DN535_c0_g1_i4	1	p3	(GGC)5	15	181	195
	TRINITY_DN535_c0_g1_i11	1	p3	(GGC)5	15	181	195
	TRINITY_DN535_c0_g1_i18	1	p3	(GGC)5	15	153	167
	TRINITY_DN535_c0_g1_i16	1	p3	(GGC)5	15	181	195
	TRINITY_DN535_c0_g1_i2	1	p3	(GGC)5	15	153	167
	TRINITY_DN535_c0_g1_i6	1	p3	(GGC)5	15	153	167
	TRINITY_DN535_c0_g1_i13	1	p3	(GGC)6	18	153	170
	TRINITY_DN535_c0_g1_i14	1	p3	(GGC)6	18	153	170
	TRINITY_DN535_c0_g1_i15	1	p3	(GGC)6	18	153	170
	TRINITY_DN522_c0_g1_i8	1	p2	(TG)6	12	411	422
	TRINITY_DN522_c0_g1_i10	1	p2	(TG)6	12	265	276
	TRINITY_DN522_c0_g1_i5	1	p2	(TG)6	12	411	422
	TRINITY_DN522_c0_g1_i7	1	p2	(TG)6	12	411	422
	TRINITY_DN522_c0_g1_i2	1	p2	(TG)6	12	411	422
	TRINITY_DN522_c0_g1_i9	1	p2	(TG)6	12	411	422
	TRINITY_DN522_c0_g1_i6	1	p2	(TG)6	12	411	422
	TRINITY_DN522_c0_g1_i1	1	p2	(TG)6	12	411	422
	TRINITY_DN522_c0_g1_i3	1	p2	(TG)6	12	411	422
	TRINITY_DN522_c0_g1_i4	1	p2	(TG)6	12	265	276
	TRINITY_DN522_c1_g1_i9	1	p2	(AT)6	12	2223	2234
	TRINITY_DN522_c1_g1_i5	1	p2	(AT)6	12	2260	2271
	TRINITY_DN522_c1_g1_i6	1	p2	(AT)6	12	2260	2271
	TRINITY_DN522_c1_g1_i11	1	p2	(AT)6	12	2223	2234
	TRINITY_DN522_c1_g1_i4	1	p2	(AT)6	12	2267	2278
	TRINITY_DN522_c1_g1_i10	1	p2	(AT)6	12	2230	2241
	TRINITY_DN560_c4_g2_i5	1	p3	(CCG)5	15	112	126
	TRINITY_DN531_c0_g1_i11	1	p1	(C)10	10	314	323
	TRINITY_DN599_c0_g1_i3	1	p3	(CCG)7	21	46	66
	TRINITY_DN599_c0_g1_i6	1	p3	(CCG)6	18	46	63
	TRINITY_DN599_c0_g1_i7	1	p3	(CCG)7	21	46	66
	TRINITY_DN599_c0_g1_i1	1	p3	(CCG)6	18	46	63
	TRINITY_DN599_c0_g1_i2	1	p3	(CCG)7	21	46	66
	TRINITY_DN599_c0_g1_i4	1	p3	(CCG)7	21	46	66
	TRINITY_DN599_c0_g1_i8	1	p3	(CCG)7	21	46	66
	TRINITY_DN599_c0_g1_i5	1	p3	(CCG)6	18	46	63
	TRINITY_DN562_c0_g1_i9	1	p1	(A)10	10	1357	1366
	TRINITY_DN512_c0_g1_i10	1	p3	(CCT)5	15	1562	1576
	TRINITY_DN512_c0_g1_i4	1	p3	(CCT)5	15	1573	1587
	TRINITY_DN512_c0_g1_i7	1	p3	(CCT)5	15	1530	1544
	TRINITY_DN512_c0_g2_i1	1	p1	(T)10	10	1	10
	TRINITY_DN520_c0_g1_i6	1	p3	(TGA)5	15	1346	1360
	TRINITY_DN520_c0_g1_i4	1	p3	(TGA)5	15	1346	1360
	TRINITY_DN520_c0_g1_i1	1	p3	(TGA)5	15	1346	1360
	TRINITY_DN595_c0_g1_i6	1	p1	(T)12	12	2756	2767
	TRINITY_DN595_c0_g1_i10	1	p1	(T)12	12	2756	2767
	TRINITY_DN515_c0_g1_i4	1	p2	(GA)6	12	22	33
	TRINITY_DN515_c0_g2_i1	1	p2	(CA)17	34	29	62
	TRINITY_DN529_c0_g2_i2	1	p3	(GCC)5	15	69	83
	TRINITY_DN529_c0_g2_i3	1	p3	(GCC)5	15	69	83
	TRINITY_DN529_c0_g2_i4	1	p3	(GCC)5	15	69	83
	TRINITY_DN529_c0_g2_i1	1	p3	(GCC)5	15	69	83
	TRINITY_DN532_c0_g1_i1	1	p2	(GT)18	36	681	716
	TRINITY_DN532_c0_g1_i5	1	p4	(TGAT)5	20	169	188
	TRINITY_DN532_c0_g1_i5	2	p3	(CTG)5	15	1748	1762
	TRINITY_DN532_c0_g1_i5	3	c	(A)10g(A)10	21	2817	2837
	TRINITY_DN532_c0_g1_i2	1	p4	(TGAT)5	20	169	188
	TRINITY_DN532_c0_g1_i2	2	p3	(CTG)5	15	1748	1762
	TRINITY_DN532_c0_g1_i4	1	p2	(GT)18	36	686	721
	TRINITY_DN532_c0_g1_i3	1	p2	(GT)11	22	700	721
	TRINITY_DN532_c0_g3_i2	1	p4	(GCGT)5	20	143	162
	TRINITY_DN532_c0_g3_i1	1	p4	(GCGT)5	20	143	162
	TRINITY_DN557_c0_g1_i8	1	p1	(A)10	10	336	345
	TRINITY_DN557_c0_g1_i3	1	p1	(A)10	10	336	345
	TRINITY_DN557_c0_g1_i4	1	p1	(A)10	10	35	44
	TRINITY_DN557_c1_g1_i8	1	p1	(A)11	11	31	41
	TRINITY_DN557_c1_g1_i5	1	p1	(A)11	11	31	41
	TRINITY_DN541_c0_g1_i15	1	p3	(AGA)5	15	619	633
	TRINITY_DN541_c0_g1_i1	1	p3	(AGA)6	18	632	649
	TRINITY_DN541_c0_g1_i6	1	p3	(AGA)5	15	619	633
	TRINITY_DN541_c0_g1_i9	1	p3	(AGA)5	15	619	633
	TRINITY_DN541_c0_g1_i18	1	p3	(AGA)6	18	632	649
	TRINITY_DN541_c0_g1_i11	1	p3	(AGA)6	18	632	649
	TRINITY_DN541_c0_g1_i17	1	p3	(AGA)5	15	619	633
	TRINITY_DN541_c0_g1_i21	1	p3	(AGA)5	15	619	633
	TRINITY_DN541_c0_g1_i14	1	p3	(AGA)6	18	632	649
	TRINITY_DN541_c0_g1_i4	1	p3	(AGA)5	15	619	633
	TRINITY_DN541_c0_g1_i12	1	p3	(AGA)5	15	619	633
	TRINITY_DN541_c0_g1_i8	1	p3	(AGA)5	15	619	633
	TRINITY_DN541_c0_g1_i19	1	p3	(AGA)6	18	632	649
	TRINITY_DN541_c0_g1_i16	1	p3	(AGA)5	15	619	633
	TRINITY_DN541_c0_g1_i5	1	p3	(AGA)5	15	619	633
	TRINITY_DN574_c0_g1_i2	1	p4	(ATCC)5	20	105	124
	TRINITY_DN574_c0_g1_i3	1	p4	(ATCC)5	20	105	124
	TRINITY_DN551_c0_g1_i2	1	p3	(GCC)5	15	258	272
	TRINITY_DN551_c0_g1_i3	1	p3	(GCC)5	15	258	272
	TRINITY_DN551_c0_g1_i13	1	p3	(GCC)5	15	258	272
	TRINITY_DN551_c0_g1_i4	1	p3	(GCC)5	15	258	272
	TRINITY_DN551_c0_g1_i9	1	p3	(GCC)5	15	258	272
	TRINITY_DN551_c0_g1_i8	1	p3	(GCC)5	15	258	272
	TRINITY_DN551_c0_g1_i1	1	p3	(GCC)5	15	258	272
	TRINITY_DN552_c1_g1_i6	1	p3	(GCG)5	15	672	686
	TRINITY_DN552_c1_g1_i5	1	p3	(GCG)5	15	672	686
	TRINITY_DN564_c0_g1_i1	1	p2	(GA)8	16	3273	3288
	TRINITY_DN563_c0_g1_i4	1	p3	(GCG)5	15	980	994
	TRINITY_DN501_c0_g1_i2	1	p4	(GGAC)5	20	1291	1310
	TRINITY_DN501_c1_g1_i2	1	p3	(GGA)6	18	33	50
	TRINITY_DN501_c2_g1_i2	1	c	(GACG)6gaccgacgggaggttcccgaaatggcggtttcggccaaggagcgcaagctgagcaggctcggcagtggtaaggcggcaaac(GGA)5	120	185	304
	TRINITY_DN501_c2_g1_i1	1	p3	(GGA)5	15	230	244
	TRINITY_DN534_c0_g1_i5	1	p3	(GAA)8	24	1	24
	TRINITY_DN534_c1_g1_i2	1	p3	(AGA)8	24	1877	1900
	TRINITY_DN534_c1_g1_i1	1	p3	(AGA)8	24	1874	1897
	TRINITY_DN534_c1_g1_i5	1	p3	(GCC)7	21	27	47
	TRINITY_DN589_c0_g2_i4	1	p2	(TG)7	14	866	879
	TRINITY_DN589_c0_g2_i1	1	p2	(TG)7	14	866	879
	TRINITY_DN589_c1_g1_i9	1	c	(GT)6(GC)6	24	1890	1913
	TRINITY_DN589_c1_g1_i1	1	p2	(GC)6	12	2155	2166
	TRINITY_DN527_c0_g2_i8	1	p3	(CGG)5	15	571	585
	TRINITY_DN527_c0_g2_i8	2	p6	(TTTTTC)5	30	2158	2187
	TRINITY_DN527_c0_g2_i6	1	p3	(CGG)5	15	571	585
	TRINITY_DN527_c0_g2_i7	1	p3	(CGG)5	15	571	585
	TRINITY_DN527_c0_g2_i5	1	p3	(CGG)5	15	572	586
	TRINITY_DN527_c0_g2_i10	1	p3	(CGG)5	15	571	585
	TRINITY_DN527_c0_g2_i10	2	p2	(CT)6	12	1361	1372
	TRINITY_DN527_c0_g2_i1	1	p3	(CGG)5	15	571	585
	TRINITY_DN527_c0_g2_i1	2	p6	(TTTTTC)5	30	2021	2050
	TRINITY_DN527_c0_g2_i3	1	p3	(GCA)5	15	376	390
	TRINITY_DN527_c0_g2_i3	2	p3	(CGG)5	15	577	591
	TRINITY_DN527_c0_g2_i3	3	p2	(CT)6	12	1230	1241
	TRINITY_DN568_c0_g1_i2	1	p1	(T)10	10	637	646
	TRINITY_DN568_c0_g3_i2	1	p3	(CGA)5	15	647	661
	TRINITY_DN568_c0_g3_i3	1	p3	(CGA)5	15	653	667
	TRINITY_DN508_c4_g1_i1	1	p2	(TG)6	12	542	553
	TRINITY_DN508_c4_g1_i1	2	p3	(CAT)5	15	670	684
	TRINITY_DN508_c4_g1_i3	1	p2	(TG)6	12	542	553
	TRINITY_DN45108_c1_g1_i1	1	p1	(A)14	14	71	84
	TRINITY_DN45123_c0_g1_i4	1	p3	(GCC)5	15	465	479
	TRINITY_DN45123_c0_g1_i3	1	p3	(GCC)5	15	577	591
	TRINITY_DN45123_c0_g1_i1	1	p2	(CT)6	12	143	154
	TRINITY_DN45123_c0_g1_i1	2	p3	(GCC)5	15	475	489
	TRINITY_DN45123_c0_g1_i2	1	p3	(GCC)5	15	452	466
	TRINITY_DN45123_c0_g1_i5	1	p3	(GCC)5	15	495	509
	TRINITY_DN45118_c0_g1_i4	1	p2	(TG)8	16	290	305
	TRINITY_DN45131_c0_g1_i1	1	p1	(T)10	10	2114	2123
	TRINITY_DN45187_c0_g2_i1	1	p3	(AAG)5	15	60	74
	TRINITY_DN45161_c2_g1_i1	1	p2	(TG)7	14	98	111
	TRINITY_DN45186_c0_g2_i8	1	p3	(CGG)5	15	332	346
	TRINITY_DN45177_c0_g2_i5	1	p3	(GCC)6	18	186	203
	TRINITY_DN45177_c0_g2_i1	1	p3	(GCC)6	18	186	203
	TRINITY_DN45177_c0_g2_i4	1	p3	(GCC)6	18	186	203
	TRINITY_DN45188_c0_g1_i1	1	p1	(A)10	10	201	210
	TRINITY_DN45188_c0_g1_i4	1	p1	(A)10	10	1800	1809
	TRINITY_DN45188_c0_g1_i6	1	p1	(C)11	11	1578	1588
	TRINITY_DN45165_c0_g3_i1	1	p1	(T)13	13	177	189
	TRINITY_DN45165_c0_g3_i2	1	p1	(T)13	13	265	277
	TRINITY_DN45104_c0_g2_i1	1	p1	(A)10	10	139	148
	TRINITY_DN45104_c0_g3_i1	1	p1	(A)10	10	247	256
	TRINITY_DN45150_c0_g1_i1	1	p3	(GAG)5	15	441	455
	TRINITY_DN99992_c0_g1_i1	1	p1	(A)10	10	1173	1182
	TRINITY_DN5991_c0_g1_i2	1	p3	(CAC)6	18	441	458
	TRINITY_DN5907_c0_g2_i5	1	p3	(CGC)5	15	67	81
	TRINITY_DN5907_c0_g2_i4	1	p3	(CGC)5	15	67	81
	TRINITY_DN5907_c0_g2_i1	1	p3	(CGC)7	21	67	87
	TRINITY_DN5907_c0_g2_i3	1	p3	(CGC)5	15	67	81
	TRINITY_DN5950_c0_g1_i8	1	p3	(CAG)7	21	134	154
	TRINITY_DN5950_c0_g1_i5	1	p3	(CAG)7	21	134	154
	TRINITY_DN5950_c0_g1_i4	1	p3	(CAG)7	21	134	154
	TRINITY_DN5950_c1_g1_i1	1	p3	(GCA)6	18	136	153
	TRINITY_DN5928_c1_g1_i4	1	p3	(GTC)5	15	562	576
	TRINITY_DN5928_c1_g1_i6	1	p3	(GTC)5	15	553	567
	TRINITY_DN5928_c1_g1_i1	1	p3	(GTC)5	15	553	567
	TRINITY_DN5928_c1_g1_i2	1	p3	(GTC)5	15	553	567
	TRINITY_DN5928_c1_g1_i3	1	p3	(GTC)5	15	565	579
	TRINITY_DN5916_c0_g1_i17	1	p1	(T)10	10	1268	1277
	TRINITY_DN5916_c0_g1_i18	1	p1	(T)10	10	1256	1265
	TRINITY_DN5916_c0_g1_i15	1	p1	(T)10	10	1292	1301
	TRINITY_DN5916_c0_g1_i3	1	p1	(T)10	10	1249	1258
	TRINITY_DN5916_c0_g1_i5	1	p1	(T)10	10	1261	1270
	TRINITY_DN5916_c0_g1_i4	1	p1	(T)10	10	1285	1294
	TRINITY_DN5996_c0_g3_i1	1	p3	(GCC)6	18	17	34
	TRINITY_DN5974_c0_g1_i3	1	p2	(TG)7	14	659	672
	TRINITY_DN5974_c0_g1_i1	1	p2	(TG)8	16	497	512
	TRINITY_DN5922_c0_g1_i2	1	p3	(GCC)6	18	76	93
	TRINITY_DN5922_c0_g1_i7	1	p3	(GCC)6	18	76	93
	TRINITY_DN5922_c0_g1_i1	1	p3	(GCC)6	18	76	93
	TRINITY_DN5922_c0_g1_i3	1	p3	(GCC)5	15	79	93
	TRINITY_DN5922_c0_g1_i5	1	p3	(GCC)6	18	76	93
	TRINITY_DN5922_c0_g1_i6	1	p3	(GCC)6	18	76	93
	TRINITY_DN5922_c1_g1_i1	1	p3	(GCC)5	15	197	211
	TRINITY_DN5937_c0_g1_i8	1	p3	(GAT)5	15	638	652
	TRINITY_DN5937_c0_g1_i13	1	p3	(GAT)5	15	653	667
	TRINITY_DN5937_c0_g1_i6	1	c	(GAT)5aataagtttccgacgtcgccgaacagccttgcctttgccnnnnnnnnnnnnnnnnnnnnntccgatacttgagatgatgac(GAT)5	111	653	763
	TRINITY_DN5937_c0_g1_i1	1	p3	(GAT)5	15	639	653
	TRINITY_DN5937_c0_g1_i10	1	c	(GAT)5aataagtttccgatgtcgtcgaacagcctttcctttgccttgttagctgcttccacagaatctaagacttga(GAT)5	102	648	749
	TRINITY_DN5937_c0_g1_i3	1	p3	(GAT)5	15	638	652
	TRINITY_DN5937_c0_g1_i12	1	p3	(GAT)5	15	654	668
	TRINITY_DN5937_c0_g1_i5	1	p3	(GAT)5	15	653	667
	TRINITY_DN5937_c1_g1_i4	1	p3	(ATG)8	24	1290	1313
	TRINITY_DN5977_c0_g2_i1	1	p3	(GAG)6	18	114	131
	TRINITY_DN5929_c0_g1_i1	1	p1	(A)14	14	1176	1189
	TRINITY_DN5993_c0_g1_i14	1	p2	(CT)6	12	63	74
	TRINITY_DN5993_c0_g1_i3	1	p2	(CT)6	12	63	74
	TRINITY_DN5993_c0_g1_i17	1	p2	(CT)6	12	63	74
	TRINITY_DN5972_c0_g2_i1	1	p3	(CCT)6	18	111	128
	TRINITY_DN5972_c2_g1_i1	1	p3	(GCC)5	15	266	280
	TRINITY_DN5972_c2_g1_i2	1	p3	(GCC)5	15	317	331
	TRINITY_DN5972_c2_g1_i5	1	p3	(GCC)5	15	248	262
	TRINITY_DN5968_c0_g1_i1	1	p2	(GC)6	12	376	387
	TRINITY_DN5968_c0_g1_i3	1	p2	(GC)6	12	376	387
	TRINITY_DN5968_c0_g1_i2	1	p2	(GC)6	12	376	387
	TRINITY_DN5998_c0_g2_i5	1	c	(CTC)7acgtccaaactgctggtgctcctctcaacctcctcctg(CT)14	87	911	997
	TRINITY_DN5998_c1_g1_i4	1	p3	(CTC)7	21	33	53
	TRINITY_DN5998_c1_g1_i1	1	p3	(CTC)7	21	33	53
	TRINITY_DN5998_c1_g1_i5	1	p3	(CTC)7	21	33	53
	TRINITY_DN5998_c1_g1_i6	1	p3	(CTC)7	21	33	53
	TRINITY_DN5999_c0_g1_i3	1	p3	(TCC)6	18	153	170
	TRINITY_DN5999_c0_g1_i2	1	p3	(TCC)6	18	153	170
	TRINITY_DN5930_c2_g1_i2	1	p1	(A)11	11	412	422
	TRINITY_DN5900_c0_g1_i3	1	p1	(A)10	10	253	262
	TRINITY_DN5918_c0_g2_i6	1	p3	(GCC)5	15	66	80
	TRINITY_DN5918_c0_g2_i5	1	p3	(GCC)5	15	66	80
	TRINITY_DN5988_c0_g4_i1	1	p3	(CTT)5	15	922	936
	TRINITY_DN5988_c0_g4_i2	1	p3	(CTT)5	15	922	936
	TRINITY_DN5989_c0_g1_i3	1	p3	(GAG)5	15	215	229
	TRINITY_DN5989_c0_g1_i5	1	p3	(GAG)5	15	215	229
	TRINITY_DN5989_c0_g1_i4	1	p3	(GCG)5	15	44	58
	TRINITY_DN5989_c0_g1_i4	2	p3	(GAG)5	15	215	229
	TRINITY_DN5989_c0_g1_i4	3	p1	(T)12	12	1105	1116
	TRINITY_DN5989_c0_g1_i7	1	p3	(GCG)5	15	44	58
	TRINITY_DN5989_c0_g1_i7	2	p3	(GAG)5	15	215	229
	TRINITY_DN5989_c0_g1_i2	1	p3	(GCG)5	15	44	58
	TRINITY_DN5989_c0_g1_i2	2	p3	(GAG)5	15	215	229
	TRINITY_DN5989_c0_g1_i6	1	p3	(GCG)5	15	44	58
	TRINITY_DN5989_c0_g1_i6	2	p3	(GAG)5	15	215	229
	TRINITY_DN5935_c0_g1_i2	1	p2	(TG)12	24	834	857
	TRINITY_DN5932_c0_g1_i1	1	p1	(T)10	10	1317	1326
	TRINITY_DN5932_c0_g3_i1	1	p1	(A)11	11	198	208
	TRINITY_DN5994_c1_g1_i1	1	p2	(GA)6	12	288	299
	TRINITY_DN5970_c0_g1_i2	1	p3	(CGC)5	15	52	66
	TRINITY_DN5970_c0_g1_i1	1	p3	(CGC)5	15	227	241
	TRINITY_DN5970_c0_g1_i3	1	p3	(CGC)5	15	52	66
	TRINITY_DN5970_c0_g1_i4	1	p3	(CGC)5	15	227	241
	TRINITY_DN5970_c0_g1_i4	2	p1	(T)12	12	849	860
	TRINITY_DN5970_c0_g1_i5	1	p3	(CGC)5	15	52	66
	TRINITY_DN5944_c0_g1_i16	1	p3	(GGA)5	15	635	649
	TRINITY_DN5944_c0_g1_i17	1	p3	(GGA)5	15	609	623
	TRINITY_DN5944_c0_g1_i17	2	p1	(T)10	10	4029	4038
	TRINITY_DN5944_c0_g1_i8	1	p3	(GGA)5	15	609	623
	TRINITY_DN5944_c0_g1_i2	1	p3	(GGA)5	15	638	652
	TRINITY_DN5944_c0_g1_i3	1	p3	(GGA)5	15	609	623
	TRINITY_DN5944_c0_g1_i11	1	p3	(GGA)5	15	635	649
	TRINITY_DN5944_c0_g1_i14	1	p3	(GGA)5	15	609	623
	TRINITY_DN5944_c0_g1_i13	1	p3	(GGA)5	15	609	623
	TRINITY_DN5944_c0_g1_i18	1	p3	(GGA)5	15	609	623
	TRINITY_DN5944_c0_g1_i4	1	p3	(GGA)5	15	638	652
	TRINITY_DN5944_c0_g1_i19	1	p3	(GGA)5	15	609	623
	TRINITY_DN5940_c0_g1_i1	1	p3	(CCT)5	15	48	62
	TRINITY_DN5940_c0_g1_i3	1	p3	(CCT)5	15	48	62
	TRINITY_DN5949_c0_g1_i6	1	p2	(GA)8	16	212	227
	TRINITY_DN5949_c0_g1_i5	1	p2	(GA)8	16	212	227
	TRINITY_DN5949_c1_g1_i5	1	c	(ATCTC)5atctgc(TGTAT)5	56	5	60
	TRINITY_DN5949_c1_g1_i4	1	c	(CTCAT)6ctgc(TGTAT)5	59	2	60
	TRINITY_DN5949_c1_g1_i2	1	c	(ATCTC)5atctgc(TGTAT)5	56	5	60
	TRINITY_DN5949_c1_g1_i1	1	c	(CTCAT)5ctgc(TGTAT)5	54	7	60
	TRINITY_DN5949_c1_g1_i3	1	c	(CTCAT)6ctgc(TGTAT)5	59	2	60
	TRINITY_DN5949_c2_g1_i1	1	p2	(GA)7	14	15	28
	TRINITY_DN5949_c3_g1_i2	1	p5	(GGAAA)10	50	178	227
	TRINITY_DN5969_c0_g1_i2	1	p2	(TC)19	38	77	114
	TRINITY_DN5969_c0_g1_i4	1	p2	(TC)19	38	77	114
	TRINITY_DN5912_c0_g1_i7	1	p3	(CGC)5	15	16	30
	TRINITY_DN5912_c0_g1_i3	1	p3	(CCG)7	21	17	37
	TRINITY_DN5912_c0_g1_i2	1	p3	(CCG)7	21	17	37
	TRINITY_DN5912_c0_g1_i6	1	p3	(CCG)7	21	17	37
	TRINITY_DN5919_c0_g1_i3	1	p3	(AGG)5	15	314	328
	TRINITY_DN5976_c0_g1_i4	1	p3	(GCC)5	15	336	350
	TRINITY_DN5976_c0_g1_i1	1	p3	(GCC)5	15	336	350
	TRINITY_DN5976_c0_g1_i6	1	p3	(GCC)5	15	285	299
	TRINITY_DN5976_c0_g1_i5	1	p3	(GCC)5	15	336	350
	TRINITY_DN5976_c0_g1_i3	1	p3	(GCC)5	15	336	350
	TRINITY_DN84534_c1_g1_i2	1	p2	(GT)7	14	227	240
	TRINITY_DN84510_c0_g1_i1	1	p1	(A)10	10	582	591
	TRINITY_DN84561_c0_g1_i2	1	p3	(ATG)6	18	44	61
	TRINITY_DN84561_c0_g1_i1	1	p3	(ATG)6	18	44	61
	TRINITY_DN84562_c0_g1_i1	1	p1	(T)10	10	828	837
	TRINITY_DN84540_c0_g1_i1	1	p3	(GAG)5	15	428	442
	TRINITY_DN84576_c0_g1_i2	1	p2	(TC)8	16	75	90
	TRINITY_DN84563_c0_g1_i1	1	p2	(CT)7	14	85	98
	TRINITY_DN84563_c0_g1_i1	2	p2	(GT)6	12	1400	1411
	TRINITY_DN84591_c0_g1_i1	1	p3	(GCG)5	15	133	147
	TRINITY_DN52125_c0_g1_i1	1	p2	(CT)10	20	500	519
	TRINITY_DN52125_c1_g1_i2	1	p2	(CT)9	18	424	441
	TRINITY_DN52125_c3_g2_i1	1	p2	(GA)12	24	278	301
	TRINITY_DN52176_c0_g1_i4	1	p1	(G)13	13	224	236
	TRINITY_DN52192_c0_g2_i2	1	p1	(A)10	10	1649	1658
	TRINITY_DN52151_c0_g1_i1	1	p1	(T)10	10	866	875
	TRINITY_DN52190_c1_g1_i2	1	p3	(GAC)5	15	202	216
	TRINITY_DN52116_c3_g1_i1	1	p1	(A)10	10	154	163
	TRINITY_DN52100_c0_g1_i1	1	p3	(CCG)6	18	12	29
	TRINITY_DN70779_c0_g1_i1	1	p1	(T)10	10	1092	1101
	TRINITY_DN70725_c0_g1_i1	1	p1	(A)11	11	233	243
	TRINITY_DN70788_c1_g1_i1	1	p1	(C)14	14	11	24
	TRINITY_DN70718_c0_g1_i2	1	p1	(T)10	10	274	283
	TRINITY_DN70729_c0_g1_i2	1	p1	(T)10	10	319	328
	TRINITY_DN70729_c0_g1_i3	1	p1	(T)10	10	319	328
	TRINITY_DN958_c0_g1_i6	1	p1	(A)10	10	689	698
	TRINITY_DN979_c0_g1_i8	1	p2	(CA)7	14	207	220
	TRINITY_DN979_c0_g1_i6	1	p2	(CA)12	24	126	149
	TRINITY_DN979_c0_g1_i7	1	p2	(CA)11	22	126	147
	TRINITY_DN979_c0_g1_i5	1	p2	(CA)11	22	126	147
	TRINITY_DN979_c0_g1_i4	1	p2	(CA)11	22	126	147
	TRINITY_DN979_c0_g1_i9	1	p2	(CA)11	22	126	147
	TRINITY_DN979_c0_g1_i2	1	p2	(CA)8	16	205	220
	TRINITY_DN979_c0_g1_i1	1	p2	(CA)7	14	207	220
	TRINITY_DN909_c0_g2_i1	1	p3	(AAG)5	15	487	501
	TRINITY_DN994_c2_g1_i1	1	p2	(TC)6	12	95	106
	TRINITY_DN953_c0_g1_i4	1	p2	(GA)15	30	504	533
	TRINITY_DN953_c0_g1_i1	1	p2	(GA)16	32	502	533
	TRINITY_DN953_c0_g1_i6	1	p2	(AG)10	20	513	532
	TRINITY_DN953_c1_g1_i3	1	p2	(TC)6	12	78	89
	TRINITY_DN954_c0_g2_i1	1	p3	(ATG)6	18	1203	1220
	TRINITY_DN954_c0_g2_i3	1	p3	(ATG)6	18	1203	1220
	TRINITY_DN921_c0_g1_i11	1	p3	(AAG)5	15	799	813
	TRINITY_DN921_c0_g1_i2	1	p3	(AAG)5	15	778	792
	TRINITY_DN921_c0_g1_i8	1	p3	(AAG)5	15	799	813
	TRINITY_DN921_c0_g1_i4	1	p3	(AAG)5	15	778	792
	TRINITY_DN921_c0_g1_i3	1	p3	(AAG)5	15	799	813
	TRINITY_DN921_c0_g1_i9	1	p3	(AAG)5	15	799	813
	TRINITY_DN921_c0_g1_i7	1	p3	(AAG)5	15	778	792
	TRINITY_DN921_c0_g1_i6	1	p3	(AAG)5	15	778	792
	TRINITY_DN921_c0_g1_i10	1	p3	(AAG)5	15	778	792
	TRINITY_DN921_c0_g1_i5	1	p3	(AAG)5	15	778	792
	TRINITY_DN959_c1_g1_i2	1	p1	(T)10	10	772	781
	TRINITY_DN937_c4_g1_i1	1	p3	(TCG)5	15	94	108
	TRINITY_DN918_c0_g1_i5	1	p3	(AGG)5	15	1202	1216
	TRINITY_DN918_c1_g2_i2	1	p2	(GT)6	12	389	400
	TRINITY_DN995_c0_g1_i9	1	c*	(TAG)5tcggctc(GTG)6gaccggtggcgctgcgaatccgagggagtagaaaggcgctcctctcctctcctccgtttcgcgagtc(AG)6(GAGAGG)5*	144	669	812
	TRINITY_DN995_c0_g1_i4	1	c	(TAG)5tcggctc(GTG)6gaccggtggcgctgcgaatccgagggagtagaaaggcgctcctctcctctcctccgtttcgcgagtc(AG)6	119	669	787
	TRINITY_DN995_c0_g1_i5	1	p2	(TC)8	16	516	531
	TRINITY_DN995_c0_g1_i5	2	c*	(AG)6(GAGAGG)5*	37	776	812
	TRINITY_DN995_c0_g1_i7	1	p2	(TC)8	16	516	531
	TRINITY_DN995_c0_g1_i7	2	c*	(TAG)5tcggctc(GTG)6gaccggtggcgctgcgaatccgagggagtagaaaggcgctcnnnnnnnnnnnnnnnnnnnnngagtc(AG)6(GAGAGG)5*	144	669	812
	TRINITY_DN995_c0_g1_i10	1	c	(TC)8tgccccgggccgcggactt(TC)8	51	481	531
	TRINITY_DN995_c0_g1_i3	1	p2	(TC)8	16	481	496
	TRINITY_DN995_c0_g1_i3	2	p3	(TAG)5	15	669	683
	TRINITY_DN916_c0_g2_i1	1	p3	(GCC)6	18	176	193
	TRINITY_DN911_c0_g1_i1	1	c	(CACG)6ca(GCAC)6	50	90	139
	TRINITY_DN911_c0_g2_i5	1	p4	(GCAC)5	20	42	61
	TRINITY_DN911_c0_g2_i4	1	p4	(GCAC)5	20	42	61
	TRINITY_DN907_c0_g1_i7	1	p1	(A)10	10	1873	1882
	TRINITY_DN907_c0_g1_i8	1	p1	(A)10	10	1875	1884
	TRINITY_DN907_c0_g1_i2	1	p1	(A)10	10	2044	2053
	TRINITY_DN965_c0_g1_i4	1	p3	(CGC)7	21	141	161
	TRINITY_DN965_c0_g1_i5	1	p3	(CGC)7	21	141	161
	TRINITY_DN965_c0_g1_i1	1	p3	(CGC)7	21	141	161
	TRINITY_DN965_c0_g1_i3	1	p3	(CGC)5	15	141	155
	TRINITY_DN965_c0_g1_i6	1	p3	(CGC)7	21	141	161
	TRINITY_DN965_c0_g1_i2	1	p3	(CGC)7	21	141	161
	TRINITY_DN965_c1_g1_i1	1	p3	(CCG)5	15	208	222
	TRINITY_DN965_c2_g1_i2	1	p3	(CCG)6	18	226	243
	TRINITY_DN923_c0_g1_i1	1	p2	(AG)8	16	150	165
	TRINITY_DN923_c0_g2_i4	1	p3	(TGC)6	18	513	530
	TRINITY_DN923_c0_g2_i5	1	p3	(TCT)5	15	635	649
	TRINITY_DN923_c0_g2_i3	1	p3	(TCT)5	15	635	649
	TRINITY_DN923_c0_g2_i2	1	p3	(TGC)6	18	513	530
	TRINITY_DN923_c0_g2_i1	1	p3	(TCT)5	15	635	649
	TRINITY_DN904_c1_g1_i8	1	p2	(GT)9	18	840	857
	TRINITY_DN904_c1_g1_i3	1	p3	(GCC)5	15	497	511
	TRINITY_DN904_c1_g1_i3	2	p2	(GT)9	18	852	869
	TRINITY_DN904_c1_g1_i1	1	p3	(CCG)7	21	446	466
	TRINITY_DN904_c1_g1_i9	1	p2	(GT)9	18	840	857
	TRINITY_DN904_c1_g1_i2	1	p3	(GCC)5	15	497	511
	TRINITY_DN904_c1_g1_i2	2	p2	(GT)9	18	852	869
	TRINITY_DN904_c1_g1_i7	1	p2	(GT)9	18	840	857
	TRINITY_DN904_c1_g1_i4	1	p3	(GCC)5	15	497	511
	TRINITY_DN904_c1_g1_i4	2	p2	(GT)9	18	852	869
	TRINITY_DN975_c0_g1_i6	1	p3	(GCT)6	18	869	886
	TRINITY_DN975_c0_g1_i2	1	p3	(TAC)5	15	423	437
	TRINITY_DN975_c0_g1_i4	1	p3	(GGC)5	15	181	195
	TRINITY_DN975_c0_g1_i3	1	p3	(TCT)5	15	448	462
	TRINITY_DN975_c0_g1_i3	2	p3	(GGT)5	15	841	855
	TRINITY_DN975_c0_g1_i5	1	p3	(GGC)5	15	181	195
	TRINITY_DN975_c0_g1_i7	1	p3	(TCT)5	15	467	481
	TRINITY_DN975_c0_g1_i7	2	p3	(GGT)5	15	860	874
	TRINITY_DN984_c0_g1_i5	1	p3	(AGA)5	15	781	795
	TRINITY_DN984_c0_g1_i3	1	p3	(AGA)5	15	781	795
	TRINITY_DN984_c0_g1_i7	1	p3	(AGA)5	15	781	795
	TRINITY_DN984_c0_g1_i4	1	p3	(AGA)5	15	781	795
	TRINITY_DN951_c0_g1_i2	1	p3	(TGG)6	18	228	245
	TRINITY_DN963_c0_g1_i3	1	p3	(CGA)8	24	41	64
	TRINITY_DN963_c0_g1_i1	1	p3	(CGA)8	24	41	64
	TRINITY_DN963_c0_g1_i4	1	p3	(CGA)8	24	41	64
	TRINITY_DN987_c0_g2_i8	1	p3	(CAG)5	15	847	861
	TRINITY_DN987_c0_g2_i7	1	p3	(CAG)5	15	799	813
	TRINITY_DN987_c0_g2_i6	1	p3	(CAG)5	15	839	853
	TRINITY_DN987_c0_g2_i4	1	p3	(CAG)5	15	854	868
	TRINITY_DN987_c0_g2_i5	1	p3	(CAG)5	15	839	853
	TRINITY_DN987_c0_g2_i2	1	p3	(CAG)5	15	854	868
	TRINITY_DN987_c0_g2_i3	1	p3	(CAG)5	15	847	861
	TRINITY_DN910_c1_g1_i2	1	p3	(GGA)5	15	252	266
	TRINITY_DN980_c0_g1_i8	1	p1	(T)10	10	1720	1729
	TRINITY_DN980_c0_g1_i4	1	p1	(T)10	10	1717	1726
	TRINITY_DN980_c0_g1_i6	1	p1	(T)10	10	1723	1732
	TRINITY_DN980_c0_g1_i9	1	p1	(T)10	10	1726	1735
	TRINITY_DN932_c1_g1_i3	1	p3	(GCG)5	15	72	86
	TRINITY_DN932_c1_g1_i2	1	p3	(GCG)5	15	521	535
	TRINITY_DN967_c0_g1_i2	1	p3	(CTC)6	18	588	605
	TRINITY_DN967_c0_g1_i1	1	p3	(CTC)6	18	588	605
	TRINITY_DN926_c0_g1_i9	1	p2	(TA)7	14	1165	1178
	TRINITY_DN926_c0_g1_i1	1	p2	(TA)7	14	1170	1183
	TRINITY_DN926_c0_g1_i5	1	p2	(TA)7	14	1170	1183
	TRINITY_DN926_c0_g1_i3	1	p2	(TA)7	14	941	954
	TRINITY_DN926_c0_g1_i8	1	p2	(TA)7	14	941	954
	TRINITY_DN900_c0_g1_i4	1	p3	(GCA)6	18	1317	1334
	TRINITY_DN900_c0_g1_i3	1	p3	(CCG)5	15	1052	1066
	TRINITY_DN900_c0_g1_i3	2	p3	(GCA)6	18	1320	1337
	TRINITY_DN900_c0_g1_i2	1	p3	(CCG)5	15	1052	1066
	TRINITY_DN999_c0_g1_i6	1	p2	(TG)6	12	436	447
	TRINITY_DN999_c0_g2_i1	1	p2	(GA)10	20	245	264
	TRINITY_DN999_c0_g2_i2	1	p2	(GA)10	20	245	264
	TRINITY_DN988_c0_g1_i5	1	p1	(T)10	10	1575	1584
	TRINITY_DN988_c0_g1_i2	1	p1	(T)10	10	1575	1584
	TRINITY_DN988_c0_g1_i1	1	p1	(T)10	10	1575	1584
	TRINITY_DN988_c0_g1_i4	1	p1	(T)10	10	1575	1584
	TRINITY_DN924_c0_g1_i8	1	p3	(CGG)5	15	228	242
	TRINITY_DN949_c0_g1_i7	1	p3	(GCC)5	15	189	203
	TRINITY_DN949_c0_g1_i10	1	p3	(GCC)5	15	189	203
	TRINITY_DN949_c0_g1_i2	1	p3	(CCG)5	15	106	120
	TRINITY_DN949_c0_g1_i12	1	p3	(CCG)5	15	106	120
	TRINITY_DN949_c0_g1_i4	1	p3	(CCG)5	15	106	120
	TRINITY_DN949_c0_g1_i13	1	p3	(CCG)5	15	106	120
	TRINITY_DN949_c0_g1_i3	1	p3	(CCG)5	15	106	120
	TRINITY_DN949_c0_g1_i8	1	p3	(GCC)5	15	189	203
	TRINITY_DN949_c0_g1_i1	1	p3	(CCG)5	15	106	120
	TRINITY_DN949_c0_g2_i1	1	p3	(CCG)5	15	1	15
	TRINITY_DN939_c0_g1_i2	1	p3	(GGC)5	15	557	571
	TRINITY_DN939_c0_g1_i5	1	p3	(GGC)5	15	527	541
	TRINITY_DN939_c0_g1_i9	1	p3	(GGC)5	15	527	541
	TRINITY_DN939_c0_g1_i4	1	p3	(GGC)5	15	784	798
	TRINITY_DN944_c0_g1_i2	1	p1	(T)10	10	3216	3225
	TRINITY_DN941_c0_g1_i3	1	p1	(T)10	10	818	827
	TRINITY_DN917_c0_g2_i7	1	p4	(AATC)6	24	2130	2153
	TRINITY_DN917_c0_g2_i1	1	p4	(AATC)6	24	2130	2153
	TRINITY_DN986_c0_g1_i4	1	p2	(TG)9	18	226	243
	TRINITY_DN986_c0_g1_i2	1	p2	(TG)9	18	193	210
	TRINITY_DN943_c0_g1_i2	1	p2	(AG)9	18	59	76
	TRINITY_DN943_c0_g1_i1	1	p2	(AG)9	18	59	76
	TRINITY_DN943_c0_g2_i1	1	p2	(TC)6	12	1315	1326
	TRINITY_DN933_c2_g1_i3	1	p3	(CCA)5	15	117	131
	TRINITY_DN998_c0_g1_i11	1	p2	(AG)6	12	220	231
	TRINITY_DN998_c0_g1_i11	2	p3	(GAT)5	15	1309	1323
	TRINITY_DN998_c0_g1_i3	1	p3	(GAT)5	15	1144	1158
	TRINITY_DN998_c0_g1_i1	1	p3	(GGA)5	15	289	303
	TRINITY_DN998_c0_g1_i12	1	p3	(GGA)5	15	289	303
	TRINITY_DN998_c0_g1_i12	2	p3	(GAT)5	15	1310	1324
	TRINITY_DN998_c0_g1_i12	3	p3	(TAT)5	15	1535	1549
	TRINITY_DN998_c0_g1_i8	1	p2	(AG)6	12	220	231
	TRINITY_DN998_c0_g1_i8	2	p3	(GAT)5	15	1309	1323
	TRINITY_DN998_c0_g1_i8	3	p3	(TAT)5	15	1534	1548
	TRINITY_DN998_c0_g1_i9	1	p3	(GGA)5	15	289	303
	TRINITY_DN998_c0_g1_i6	1	p2	(AG)6	12	220	231
	TRINITY_DN998_c0_g1_i4	1	p2	(AG)6	12	220	231
	TRINITY_DN998_c0_g1_i2	1	p3	(GGA)5	15	289	303
	TRINITY_DN998_c0_g1_i2	2	p3	(GAT)5	15	1310	1324
	TRINITY_DN950_c1_g1_i2	1	p3	(GCC)5	15	241	255
	TRINITY_DN903_c0_g1_i1	1	p3	(GAA)7	21	28	48
	TRINITY_DN903_c0_g1_i2	1	p3	(AAG)7	21	29	49
	TRINITY_DN977_c0_g1_i8	1	p3	(CGC)6	18	235	252
	TRINITY_DN977_c0_g1_i6	1	p3	(CGC)5	15	238	252
	TRINITY_DN977_c0_g1_i3	1	p3	(CGC)5	15	238	252
	TRINITY_DN977_c0_g1_i2	1	p3	(CGC)6	18	229	246
	TRINITY_DN977_c0_g1_i11	1	p3	(CGC)5	15	238	252
	TRINITY_DN977_c0_g1_i4	1	p3	(CGC)5	15	238	252
	TRINITY_DN977_c0_g1_i5	1	p3	(CGC)5	15	10	24
	TRINITY_DN977_c0_g1_i9	1	p3	(CGC)6	18	235	252
	TRINITY_DN977_c0_g1_i1	1	p3	(CGC)6	18	238	255
	TRINITY_DN968_c1_g1_i1	1	p2	(AT)6	12	1887	1898
	TRINITY_DN968_c1_g1_i4	1	p2	(AT)6	12	594	605
	TRINITY_DN968_c1_g1_i7	1	p2	(AT)6	12	1382	1393
	TRINITY_DN968_c1_g1_i6	1	p2	(AT)6	12	1887	1898
	TRINITY_DN990_c0_g1_i1	1	p3	(GAT)5	15	2	16
	TRINITY_DN990_c0_g1_i2	1	p3	(GAT)5	15	2	16
	TRINITY_DN942_c0_g2_i1	1	p3	(AAG)5	15	1241	1255
	TRINITY_DN913_c0_g1_i6	1	p3	(CGA)5	15	960	974
	TRINITY_DN913_c0_g1_i2	1	p3	(CGA)5	15	960	974
	TRINITY_DN901_c0_g1_i9	1	p1	(A)11	11	58	68
	TRINITY_DN901_c0_g1_i9	2	p3	(GCA)5	15	305	319
	TRINITY_DN901_c0_g1_i9	3	p3	(TGA)5	15	851	865
	TRINITY_DN901_c0_g1_i10	1	p1	(A)11	11	58	68
	TRINITY_DN901_c0_g1_i10	2	p3	(GCA)5	15	305	319
	TRINITY_DN901_c0_g1_i10	3	p3	(TGA)5	15	851	865
	TRINITY_DN901_c0_g1_i3	1	p3	(GCA)6	18	314	331
	TRINITY_DN901_c0_g1_i3	2	p3	(TGA)5	15	873	887
	TRINITY_DN901_c0_g1_i2	1	p1	(A)11	11	58	68
	TRINITY_DN901_c0_g1_i2	2	p3	(GCA)5	15	305	319
	TRINITY_DN901_c0_g1_i4	1	p3	(GCA)7	21	286	306
	TRINITY_DN901_c0_g1_i4	2	p3	(TGA)5	15	860	874
	TRINITY_DN901_c0_g1_i8	1	p3	(GCA)7	21	286	306
	TRINITY_DN901_c0_g1_i8	2	p3	(TGA)5	15	832	846
	TRINITY_DN901_c0_g1_i11	1	p1	(A)11	11	58	68
	TRINITY_DN901_c0_g1_i11	2	p3	(GCA)5	15	305	319
	TRINITY_DN901_c0_g1_i11	3	p3	(TGA)5	15	879	893
	TRINITY_DN901_c0_g1_i7	1	p3	(GCA)7	21	286	306
	TRINITY_DN901_c0_g1_i7	2	p3	(TGA)5	15	832	846
	TRINITY_DN970_c0_g1_i3	1	p3	(CGC)6	18	157	174
	TRINITY_DN970_c0_g1_i1	1	p3	(CGC)6	18	157	174
	TRINITY_DN970_c0_g1_i1	2	p4	(TGTC)5	20	4147	4166
	TRINITY_DN970_c0_g1_i2	1	p3	(CGC)6	18	157	174
	TRINITY_DN970_c0_g1_i2	2	p4	(TGTC)5	20	4147	4166
	TRINITY_DN936_c0_g1_i10	1	c	(GAC)5(GCT)5	30	613	642
	TRINITY_DN936_c0_g1_i13	1	p3	(GCT)5	15	628	642
	TRINITY_DN936_c0_g1_i13	2	p2	(AG)10	20	2967	2986
	TRINITY_DN936_c0_g1_i11	1	c	(GAC)5(GCT)5	30	613	642
	TRINITY_DN936_c0_g1_i11	2	p4	(AGGA)5	20	2980	2999
	TRINITY_DN936_c0_g1_i8	1	p4	(AGGA)5	20	2965	2984
	TRINITY_DN936_c0_g1_i12	1	c	(GAC)5(GCT)5	30	613	642
	TRINITY_DN936_c0_g1_i12	2	p2	(AG)10	20	3003	3022
	TRINITY_DN936_c0_g1_i6	1	p2	(AG)10	20	2952	2971
	TRINITY_DN936_c0_g1_i3	1	c	(GAC)5(GCT)5	30	613	642
	TRINITY_DN936_c0_g1_i3	2	p4	(AGGA)5	20	3016	3035
	TRINITY_DN936_c0_g1_i14	1	c	(TC)8taaaagaaaat(A)10	37	94	130
	TRINITY_DN936_c0_g1_i14	2	p4	(AGGA)5	20	3025	3044
	TRINITY_DN936_c0_g1_i4	1	c	(GAC)5(GCT)5	30	613	642
	TRINITY_DN74163_c0_g1_i1	1	p2	(AC)20	40	1267	1306
	TRINITY_DN74189_c0_g1_i5	1	p3	(ACC)5	15	937	951
	TRINITY_DN74189_c0_g1_i5	2	p3	(CCA)6	18	1241	1258
	TRINITY_DN74189_c0_g1_i1	1	p3	(CCA)6	18	1238	1255
	TRINITY_DN74189_c0_g1_i4	1	p3	(CCA)5	15	935	949
	TRINITY_DN74189_c0_g1_i4	2	p3	(CCA)6	18	1238	1255
	TRINITY_DN74189_c0_g1_i2	1	p3	(CCA)5	15	859	873
	TRINITY_DN74189_c0_g1_i2	2	p3	(CCA)6	18	1162	1179
	TRINITY_DN74108_c0_g1_i1	1	p3	(AAT)5	15	258	272
	TRINITY_DN74109_c0_g1_i1	1	p4	(TTTC)8	32	1015	1046
	TRINITY_DN74109_c0_g1_i2	1	p4	(TTTC)8	32	1001	1032
	TRINITY_DN74119_c2_g1_i1	1	p3	(GAG)5	15	307	321
	TRINITY_DN74160_c0_g1_i4	1	p1	(T)10	10	432	441
	TRINITY_DN34753_c0_g1_i4	1	c	(ACG)6actacagcgcccgcgacctcgtcacccccagcttcttctcgcagggtatgctt(G)10aaga(AG)9	103	144	246
	TRINITY_DN34753_c0_g1_i3	1	p3	(ACG)6	18	144	161
	TRINITY_DN34753_c0_g1_i2	1	c	(AG)8aagagagggaaaga(AG)6	42	43	84
	TRINITY_DN34753_c0_g1_i2	2	p3	(ACG)5	15	261	275
	TRINITY_DN34753_c0_g1_i1	1	p3	(ACG)6	18	144	161
	TRINITY_DN34724_c0_g1_i1	1	p3	(CCA)5	15	159	173
	TRINITY_DN34724_c0_g1_i3	1	p3	(CAT)5	15	179	193
	TRINITY_DN34724_c0_g1_i2	1	p3	(CAT)5	15	179	193
	TRINITY_DN34724_c0_g1_i2	2	p2	(GA)11	22	461	482
	TRINITY_DN34784_c0_g1_i2	1	p1	(C)11	11	176	186
	TRINITY_DN34735_c0_g1_i1	1	p2	(AG)7	14	126	139
	TRINITY_DN34757_c0_g1_i2	1	c	(GC)6catgggataggtaggggctctcggcgggccatggagtgggacagcgactcggacggcagcggggaggaggac(GAG)5	99	175	273
	TRINITY_DN34727_c0_g1_i4	1	p3	(GAC)5	15	158	172
	TRINITY_DN34727_c0_g1_i3	1	p3	(GAC)5	15	158	172
	TRINITY_DN34727_c0_g1_i2	1	p3	(GAC)5	15	158	172
	TRINITY_DN34743_c0_g1_i5	1	p3	(GAC)5	15	1797	1811
	TRINITY_DN34743_c0_g1_i7	1	p3	(GAC)5	15	1797	1811
	TRINITY_DN34743_c0_g1_i1	1	p3	(GAC)5	15	210	224
	TRINITY_DN34743_c0_g1_i8	1	p3	(GAC)5	15	1797	1811
	TRINITY_DN34743_c0_g1_i2	1	p3	(GAC)5	15	1797	1811
	TRINITY_DN34719_c0_g1_i1	1	p3	(CCT)5	15	450	464
	TRINITY_DN34799_c0_g1_i3	1	p2	(GT)23	46	765	810
	TRINITY_DN34799_c0_g1_i4	1	p2	(GT)23	46	7	52
	TRINITY_DN34789_c0_g1_i1	1	p2	(GA)7	14	96	109
	TRINITY_DN34760_c0_g1_i5	1	p1	(T)10	10	919	928
	TRINITY_DN12301_c0_g1_i2	1	p3	(GAT)5	15	2639	2653
	TRINITY_DN12301_c0_g1_i1	1	p3	(GAT)5	15	182	196
	TRINITY_DN12301_c0_g1_i7	1	p3	(GAT)5	15	2657	2671
	TRINITY_DN12301_c0_g1_i3	1	p3	(GAT)5	15	2639	2653
	TRINITY_DN12301_c0_g1_i11	1	p3	(GAT)5	15	464	478
	TRINITY_DN12301_c0_g1_i12	1	p3	(GAT)5	15	2657	2671
	TRINITY_DN12301_c0_g1_i14	1	p3	(GAT)5	15	2639	2653
	TRINITY_DN12320_c0_g1_i3	1	c	(A)10gaat(TTG)12	50	403	452
	TRINITY_DN12320_c0_g1_i5	1	p1	(A)10	10	804	813
	TRINITY_DN12330_c0_g2_i1	1	p3	(AGA)5	15	372	386
	TRINITY_DN12390_c0_g1_i1	1	p3	(CTC)5	15	208	222
	TRINITY_DN12390_c0_g1_i2	1	p3	(CTC)5	15	208	222
	TRINITY_DN12390_c0_g1_i4	1	p3	(CTC)5	15	208	222
	TRINITY_DN12390_c0_g1_i3	1	p3	(CTC)5	15	208	222
	TRINITY_DN12361_c0_g1_i5	1	p1	(T)10	10	2352	2361
	TRINITY_DN12361_c0_g1_i6	1	p1	(T)10	10	2371	2380
	TRINITY_DN12361_c0_g1_i2	1	p1	(T)10	10	2371	2380
	TRINITY_DN12371_c0_g1_i3	1	p3	(CGC)5	15	348	362
	TRINITY_DN12371_c0_g1_i3	2	p3	(CTT)5	15	1222	1236
	TRINITY_DN12371_c0_g1_i2	1	p3	(CGC)5	15	348	362
	TRINITY_DN12371_c0_g1_i2	2	p3	(CTT)6	18	1099	1116
	TRINITY_DN12371_c0_g1_i1	1	p3	(CGC)5	15	348	362
	TRINITY_DN12371_c0_g1_i1	2	p3	(CTT)5	15	1096	1110
	TRINITY_DN12371_c0_g1_i4	1	p3	(CGC)5	15	348	362
	TRINITY_DN12371_c0_g1_i4	2	p3	(CTT)5	15	1096	1110
	TRINITY_DN12300_c0_g1_i3	1	c	(CT)8catcctg(CT)17	57	538	594
	TRINITY_DN12300_c0_g1_i6	1	c	(CT)8catcctg(CT)17	57	538	594
	TRINITY_DN12342_c0_g1_i7	1	p3	(GCC)5	15	222	236
	TRINITY_DN12342_c0_g1_i1	1	p3	(GCC)5	15	222	236
	TRINITY_DN12342_c0_g1_i2	1	p3	(GCC)5	15	222	236
	TRINITY_DN12342_c0_g1_i5	1	p3	(GCC)5	15	222	236
	TRINITY_DN12315_c0_g1_i5	1	p3	(CAT)5	15	418	432
	TRINITY_DN12326_c0_g1_i1	1	p2	(TA)8	16	5070	5085
	TRINITY_DN12340_c0_g1_i13	1	p3	(GCT)5	15	1617	1631
	TRINITY_DN12340_c3_g1_i4	1	p3	(AGC)5	15	350	364
	TRINITY_DN12340_c3_g1_i2	1	p3	(AGC)5	15	335	349
	TRINITY_DN12331_c0_g1_i3	1	p1	(A)11	11	2200	2210
	TRINITY_DN12306_c0_g1_i6	1	p3	(CTC)7	21	193	213
	TRINITY_DN12306_c0_g1_i4	1	p3	(CTC)7	21	193	213
	TRINITY_DN12306_c0_g1_i3	1	p3	(CTC)7	21	193	213
	TRINITY_DN12306_c0_g1_i2	1	p3	(CCT)5	15	201	215
	TRINITY_DN12306_c0_g1_i1	1	p3	(CTC)7	21	193	213
	TRINITY_DN12355_c0_g1_i1	1	c	(CGC)5c(GGA)6	34	30	63
	TRINITY_DN12355_c0_g1_i2	1	c	(CGC)5c(GGA)6	34	30	63
	TRINITY_DN12387_c0_g1_i1	1	p3	(CGC)5	15	74	88
	TRINITY_DN12387_c0_g1_i4	1	p3	(CGC)5	15	74	88
	TRINITY_DN12387_c0_g1_i7	1	p3	(CGC)5	15	74	88
	TRINITY_DN12387_c0_g1_i5	1	p3	(CGC)5	15	74	88
	TRINITY_DN12344_c0_g1_i1	1	p3	(CCG)7	21	188	208
	TRINITY_DN12348_c0_g2_i6	1	p2	(CT)7	14	56	69
	TRINITY_DN12329_c0_g2_i2	1	p4	(CTTT)11	44	1895	1938
	TRINITY_DN12329_c0_g2_i4	1	p4	(CTTT)11	44	1498	1541
	TRINITY_DN12357_c0_g1_i3	1	p3	(CAC)7	21	366	386
	TRINITY_DN12357_c0_g1_i4	1	p3	(CAC)5	15	366	380
	TRINITY_DN12349_c0_g1_i2	1	p3	(GAG)5	15	243	257
	TRINITY_DN12349_c0_g1_i2	2	p3	(CAG)5	15	444	458
	TRINITY_DN12349_c0_g1_i8	1	p3	(GAG)5	15	243	257
	TRINITY_DN12349_c0_g1_i8	2	p3	(CAG)5	15	444	458
	TRINITY_DN12349_c0_g1_i10	1	p3	(GAG)6	18	243	260
	TRINITY_DN12349_c0_g1_i10	2	p3	(CAG)5	15	447	461
	TRINITY_DN12349_c0_g1_i5	1	p3	(GAG)5	15	243	257
	TRINITY_DN12349_c0_g1_i5	2	p3	(CAG)5	15	444	458
	TRINITY_DN12349_c2_g1_i1	1	p1	(T)12	12	243	254
	TRINITY_DN12325_c0_g1_i4	1	p3	(CTG)8	24	7342	7365
	TRINITY_DN12325_c0_g1_i6	1	p3	(CTG)8	24	7321	7344
	TRINITY_DN12324_c0_g1_i3	1	p2	(GC)6	12	219	230
	TRINITY_DN12324_c0_g1_i2	1	p2	(GC)6	12	219	230
	TRINITY_DN12324_c0_g1_i5	1	p2	(GC)6	12	181	192
	TRINITY_DN12341_c0_g3_i2	1	p3	(AGG)6	18	130	147
	TRINITY_DN12305_c0_g1_i1	1	p1	(A)11	11	1020	1030
	TRINITY_DN12358_c0_g1_i6	1	p2	(AC)7	14	16	29
	TRINITY_DN12358_c0_g1_i10	1	p2	(AC)7	14	16	29
	TRINITY_DN12358_c0_g1_i7	1	p2	(AC)7	14	16	29
	TRINITY_DN12318_c0_g1_i4	1	p2	(CG)6	12	264	275
	TRINITY_DN12319_c0_g1_i5	1	p2	(GT)6	12	283	294
	TRINITY_DN12319_c0_g1_i2	1	p2	(GT)6	12	283	294
	TRINITY_DN12393_c0_g1_i2	1	p3	(CTT)5	15	680	694
	TRINITY_DN12397_c0_g1_i1	1	c	(TG)9tatat(AC)12	47	17	63
	TRINITY_DN12397_c0_g1_i4	1	p1	(A)10	10	54	63
	TRINITY_DN12397_c0_g1_i7	1	p2	(AC)12	24	40	63
	TRINITY_DN12397_c0_g1_i7	2	p1	(T)10	10	290	299
	TRINITY_DN12397_c0_g1_i21	1	p1	(T)16	16	1513	1528
	TRINITY_DN12397_c0_g1_i19	1	p1	(T)10	10	290	299
	TRINITY_DN12397_c0_g1_i8	1	p1	(T)10	10	290	299
	TRINITY_DN12397_c0_g1_i14	1	c	(TG)9tatat(AC)12	47	17	63
	TRINITY_DN12397_c0_g1_i14	2	p1	(T)10	10	290	299
	TRINITY_DN12397_c0_g1_i16	1	c	(TG)9tatat(AC)12	47	17	63
	TRINITY_DN12397_c0_g1_i16	2	p1	(T)10	10	290	299
	TRINITY_DN12397_c0_g1_i3	1	p2	(AC)10	20	44	63
	TRINITY_DN12397_c0_g1_i3	2	p1	(T)10	10	290	299
	TRINITY_DN12379_c1_g2_i2	1	p1	(A)10	10	826	835
	TRINITY_DN12328_c0_g2_i1	1	p3	(GAC)5	15	455	469
	TRINITY_DN12396_c0_g1_i1	1	p3	(CCT)6	18	217	234
	TRINITY_DN12396_c0_g1_i5	1	p3	(CCT)6	18	217	234
	TRINITY_DN12396_c0_g1_i4	1	p3	(CCT)6	18	217	234
	TRINITY_DN12396_c0_g1_i3	1	p3	(CCT)6	18	217	234
	TRINITY_DN12347_c0_g2_i2	1	p3	(GCC)6	18	789	806
	TRINITY_DN12347_c0_g2_i4	1	c	(CGC)5cgacaacgtcttctcccgcttcctggccgaccaccagatccgagacaccaa(GCC)6	84	718	801
	TRINITY_DN12347_c0_g2_i1	1	p2	(TC)6	12	212	223
	TRINITY_DN12347_c0_g2_i1	2	p3	(GCC)6	18	764	781
	TRINITY_DN12347_c0_g2_i5	1	p3	(GCC)6	18	782	799
	TRINITY_DN12347_c0_g2_i3	1	c	(GCC)6cgtcgcccccggggcccacttccctgatgactccgccatggcatc(GCA)6	81	783	863
	TRINITY_DN12370_c0_g1_i2	1	p3	(GTC)6	18	163	180
	TRINITY_DN33406_c0_g1_i2	1	p1	(T)11	11	377	387
	TRINITY_DN33406_c0_g1_i1	1	p1	(T)11	11	377	387
	TRINITY_DN33478_c0_g1_i1	1	p2	(TC)7	14	378	391
	TRINITY_DN33478_c1_g1_i1	1	p2	(GA)8	16	162	177
	TRINITY_DN33490_c0_g3_i1	1	p2	(GA)9	18	258	275
	TRINITY_DN33490_c0_g3_i3	1	p2	(GA)9	18	258	275
	TRINITY_DN33486_c1_g1_i5	1	p3	(CCT)6	18	336	353
	TRINITY_DN33414_c0_g4_i1	1	p1	(A)10	10	156	165
	TRINITY_DN33429_c0_g1_i4	1	p3	(GCG)5	15	473	487
	TRINITY_DN33462_c0_g2_i1	1	p3	(AGC)5	15	229	243
	TRINITY_DN33419_c0_g1_i1	1	p1	(T)10	10	733	742
	TRINITY_DN33401_c0_g1_i2	1	p3	(GCG)5	15	137	151
	TRINITY_DN33497_c0_g1_i1	1	p3	(TCC)5	15	94	108
	TRINITY_DN33483_c1_g1_i3	1	p2	(TC)7	14	682	695
	TRINITY_DN33483_c1_g1_i1	1	p2	(TC)7	14	682	695
	TRINITY_DN33447_c0_g1_i1	1	p1	(A)12	12	494	505
	TRINITY_DN33447_c0_g1_i3	1	p1	(A)12	12	545	556
	TRINITY_DN33400_c0_g1_i1	1	p4	(GCTT)5	20	811	830
	TRINITY_DN33400_c0_g3_i1	1	p4	(TGCT)5	20	146	165
	TRINITY_DN33400_c0_g3_i1	2	p4	(GCTT)5	20	435	454
	TRINITY_DN33487_c1_g1_i4	1	p1	(T)10	10	812	821
	TRINITY_DN33487_c1_g1_i2	1	p1	(T)10	10	816	825
	TRINITY_DN33488_c0_g1_i10	1	p2	(GT)7	14	206	219
	TRINITY_DN33403_c0_g1_i2	1	p3	(GCG)6	18	148	165
	TRINITY_DN33422_c0_g1_i3	1	p3	(TGA)11	33	15	47
	TRINITY_DN33422_c0_g1_i2	1	p3	(TGA)8	24	24	47
	TRINITY_DN33454_c0_g2_i1	1	p3	(CGC)5	15	334	348
	TRINITY_DN41388_c2_g3_i1	1	p1	(T)10	10	136	145
	TRINITY_DN41319_c0_g1_i1	1	p1	(T)13	13	410	422
	TRINITY_DN41301_c0_g1_i2	1	p3	(GCA)6	18	672	689
	TRINITY_DN41379_c0_g1_i2	1	p3	(GCT)5	15	1599	1613
	TRINITY_DN41379_c0_g1_i1	1	p3	(GCT)5	15	1572	1586
	TRINITY_DN41329_c1_g1_i1	1	p3	(CGA)5	15	1521	1535
	TRINITY_DN41329_c1_g1_i2	1	p3	(CGA)5	15	580	594
	TRINITY_DN41329_c1_g1_i3	1	p3	(CGA)5	15	1521	1535
	TRINITY_DN41321_c0_g1_i1	1	p3	(CAC)5	15	972	986
	TRINITY_DN41307_c0_g2_i1	1	p3	(AGC)5	15	45	59
	TRINITY_DN41307_c0_g2_i2	1	p3	(AGC)5	15	45	59
	TRINITY_DN41397_c0_g1_i2	1	p3	(GAG)8	24	356	379
	TRINITY_DN41376_c2_g1_i6	1	p2	(CT)8	16	858	873
	TRINITY_DN41376_c2_g1_i8	1	p2	(CT)8	16	858	873
	TRINITY_DN41361_c0_g2_i3	1	p3	(CCT)6	18	806	823
	TRINITY_DN41361_c0_g2_i2	1	p3	(CCT)6	18	816	833
	TRINITY_DN41316_c0_g1_i6	1	p3	(CGC)6	18	36	53
	TRINITY_DN41338_c0_g1_i5	1	p3	(GGC)6	18	108	125
	TRINITY_DN41338_c0_g1_i4	1	p3	(GGC)6	18	1467	1484
	TRINITY_DN41383_c0_g1_i4	1	p2	(CT)23	46	1308	1353
	TRINITY_DN41336_c1_g1_i1	1	p3	(GAG)6	18	1228	1245
	TRINITY_DN41336_c1_g1_i2	1	p3	(GAG)6	18	1477	1494
	TRINITY_DN41311_c3_g1_i1	1	p2	(TC)10	20	237	256
	TRINITY_DN51024_c0_g1_i8	1	c	(CCT)5ccatctgccccccttcctcgcgaccgcttctctcgcggcctccac(CT)9	78	180	257
	TRINITY_DN51024_c0_g1_i3	1	c	(CCT)5ccatctgccccccttcctcgcgaccgcttctctcgcggcctccac(CT)9	78	180	257
	TRINITY_DN51091_c0_g1_i1	1	p2	(AG)8	16	14	29
	TRINITY_DN51062_c0_g1_i1	1	p2	(TC)7	14	300	313
	TRINITY_DN51029_c0_g1_i2	1	p2	(CG)6	12	105	116
	TRINITY_DN51011_c0_g1_i4	1	p3	(CAG)5	15	198	212
	TRINITY_DN51011_c0_g1_i3	1	p3	(CAG)5	15	231	245
	TRINITY_DN51013_c0_g1_i2	1	c	(TGA)5tgccaatggcaacaatcctcaaggtgctggtggcaacaatgccaatgtcaacaatccacacggagctgaa(GAT)6agtgatgatgatgaggatgatgatgataacgataaggatgatggtgatgaca(ATG)6	173	886	1058
	TRINITY_DN51004_c0_g1_i1	1	p3	(CGC)5	15	269	283
	TRINITY_DN11942_c0_g1_i1	1	p2	(TG)7	14	223	236
	TRINITY_DN11996_c0_g1_i2	1	p1	(A)10	10	1993	2002
	TRINITY_DN11996_c0_g1_i10	1	p1	(A)10	10	1992	2001
	TRINITY_DN11996_c0_g1_i7	1	p1	(A)10	10	1975	1984
	TRINITY_DN11996_c0_g1_i11	1	p1	(A)10	10	1974	1983
	TRINITY_DN11996_c0_g1_i8	1	p1	(A)10	10	1974	1983
	TRINITY_DN11996_c0_g1_i9	1	p3	(GGC)5	15	75	89
	TRINITY_DN11996_c0_g1_i9	2	p1	(A)10	10	1769	1778
	TRINITY_DN11996_c0_g1_i4	1	p3	(GGC)5	15	75	89
	TRINITY_DN11996_c0_g1_i6	1	p3	(GGC)5	15	75	89
	TRINITY_DN11996_c0_g1_i3	1	p1	(A)10	10	1993	2002
	TRINITY_DN11906_c0_g1_i5	1	p3	(CGA)5	15	95	109
	TRINITY_DN11906_c0_g1_i3	1	p3	(CGA)5	15	95	109
	TRINITY_DN11906_c0_g1_i2	1	p3	(CCT)5	15	81	95
	TRINITY_DN11931_c0_g1_i1	1	p1	(A)12	12	1018	1029
	TRINITY_DN11934_c0_g1_i1	1	p1	(T)10	10	795	804
	TRINITY_DN11934_c0_g1_i6	1	p1	(T)10	10	783	792
	TRINITY_DN11934_c0_g1_i10	1	p3	(GCC)6	18	69	86
	TRINITY_DN11902_c0_g1_i4	1	p2	(CT)8	16	24	39
	TRINITY_DN11902_c0_g1_i7	1	p2	(CT)8	16	24	39
	TRINITY_DN11995_c0_g1_i7	1	p3	(CAG)7	21	701	721
	TRINITY_DN11995_c0_g1_i6	1	p3	(CAG)6	18	429	446
	TRINITY_DN11995_c0_g1_i2	1	p3	(CAG)7	21	475	495
	TRINITY_DN11995_c0_g1_i1	1	p3	(CAG)6	18	478	495
	TRINITY_DN11995_c0_g1_i8	1	p3	(CAG)6	18	590	607
	TRINITY_DN11995_c0_g1_i5	1	p3	(CAG)6	18	761	778
	TRINITY_DN11995_c0_g1_i3	1	p3	(CAG)7	21	701	721
	TRINITY_DN11981_c0_g1_i7	1	p3	(CCA)5	15	120	134
	TRINITY_DN11981_c0_g1_i5	1	p3	(CCA)5	15	120	134
	TRINITY_DN11981_c0_g1_i2	1	p3	(CCA)5	15	120	134
	TRINITY_DN11981_c0_g1_i10	1	p3	(CCA)5	15	120	134
	TRINITY_DN11951_c0_g1_i8	1	p2	(TA)6	12	861	872
	TRINITY_DN11951_c0_g1_i4	1	p2	(TA)6	12	361	372
	TRINITY_DN11951_c0_g1_i1	1	p2	(TA)6	12	771	782
	TRINITY_DN11951_c0_g1_i9	1	p2	(TA)6	12	306	317
	TRINITY_DN11951_c0_g1_i2	1	p2	(TA)6	12	814	825
	TRINITY_DN11904_c0_g1_i1	1	p3	(GGC)5	15	410	424
	TRINITY_DN11960_c1_g1_i4	1	p2	(CG)6	12	216	227
	TRINITY_DN11960_c1_g1_i1	1	p2	(CG)6	12	216	227
	TRINITY_DN11990_c0_g1_i7	1	p3	(GCT)6	18	453	470
	TRINITY_DN11990_c0_g1_i7	2	p3	(CGC)5	15	910	924
	TRINITY_DN11990_c0_g1_i2	1	p3	(GCT)6	18	453	470
	TRINITY_DN11990_c0_g1_i1	1	p3	(GCT)6	18	453	470
	TRINITY_DN11990_c0_g1_i3	1	p3	(GCT)7	21	453	473
	TRINITY_DN11990_c0_g1_i3	2	p3	(CGC)5	15	895	909
	TRINITY_DN11990_c0_g1_i4	1	p3	(GCT)7	21	453	473
	TRINITY_DN11990_c0_g1_i9	1	p3	(GCT)5	15	454	468
	TRINITY_DN11999_c0_g1_i4	1	p3	(AAG)5	15	264	278
	TRINITY_DN11999_c0_g1_i11	1	p3	(AAG)5	15	264	278
	TRINITY_DN11999_c0_g1_i6	1	p3	(AAG)5	15	264	278
	TRINITY_DN11999_c0_g1_i9	1	p3	(AAG)5	15	264	278
	TRINITY_DN11912_c0_g1_i4	1	p3	(TCC)6	18	191	208
	TRINITY_DN11912_c0_g1_i7	1	p3	(TCC)6	18	191	208
	TRINITY_DN11912_c0_g1_i3	1	p3	(TCC)6	18	191	208
	TRINITY_DN11992_c1_g1_i8	1	p1	(T)11	11	456	466
	TRINITY_DN11992_c1_g1_i5	1	p1	(T)11	11	569	579
	TRINITY_DN11992_c1_g1_i13	1	p1	(T)11	11	1102	1112
	TRINITY_DN11918_c2_g2_i1	1	p3	(CCA)6	18	147	164
	TRINITY_DN11966_c0_g1_i10	1	p2	(GT)6	12	618	629
	TRINITY_DN11966_c0_g1_i4	1	p2	(GT)6	12	599	610
	TRINITY_DN11907_c0_g1_i1	1	p3	(GAC)5	15	1171	1185
	TRINITY_DN11907_c0_g1_i2	1	p3	(GAT)5	15	1174	1188
	TRINITY_DN11907_c0_g1_i3	1	p3	(GAT)5	15	160	174
	TRINITY_DN11949_c0_g1_i1	1	p3	(CGC)5	15	525	539
	TRINITY_DN11910_c0_g1_i24	1	p1	(C)13	13	1939	1951
	TRINITY_DN11970_c0_g1_i8	1	p3	(CAC)7	21	85	105
	TRINITY_DN11976_c1_g1_i6	1	p3	(CAG)6	18	1748	1765
	TRINITY_DN11976_c1_g1_i1	1	p3	(CAG)6	18	1921	1938
	TRINITY_DN11963_c0_g1_i8	1	p2	(CG)7	14	14	27
	TRINITY_DN11987_c0_g1_i4	1	p2	(AG)6	12	40	51
	TRINITY_DN11940_c0_g2_i2	1	p3	(CGG)6	18	417	434
	TRINITY_DN11954_c0_g1_i1	1	p2	(AG)7	14	152	165
	TRINITY_DN11954_c0_g1_i7	1	p2	(CG)6	12	432	443
	TRINITY_DN11954_c0_g1_i3	1	p3	(CTT)8	24	141	164
	TRINITY_DN11954_c0_g1_i5	1	p3	(CTT)8	24	141	164
	TRINITY_DN11954_c0_g1_i2	1	p2	(AG)7	14	152	165
	TRINITY_DN11954_c0_g1_i2	2	p2	(CG)6	12	432	443
	TRINITY_DN11911_c0_g1_i10	1	p1	(T)10	10	1892	1901
	TRINITY_DN11911_c0_g1_i3	1	p1	(T)10	10	1931	1940
	TRINITY_DN11911_c0_g1_i13	1	p1	(T)10	10	1904	1913
	TRINITY_DN11911_c0_g1_i7	1	p1	(T)10	10	1906	1915
	TRINITY_DN11911_c0_g1_i4	1	p1	(T)10	10	1919	1928
	TRINITY_DN75009_c0_g1_i3	1	p3	(ATG)6	18	504	521
	TRINITY_DN75009_c0_g1_i1	1	p3	(ATG)6	18	429	446
	TRINITY_DN75017_c0_g1_i4	1	p2	(TC)8	16	146	161
	TRINITY_DN75079_c0_g1_i1	1	p2	(TA)6	12	252	263
	TRINITY_DN75026_c0_g1_i1	1	p2	(TC)6	12	399	410
	TRINITY_DN75022_c1_g1_i1	1	p4	(TTTG)5	20	130	149
	TRINITY_DN75054_c0_g1_i1	1	p3	(GAG)5	15	168	182
	TRINITY_DN75054_c0_g1_i5	1	p3	(GAG)5	15	168	182
	TRINITY_DN75053_c0_g1_i1	1	p2	(AG)17	34	169	202
	TRINITY_DN10200_c0_g1_i4	1	p3	(CCT)6	18	173	190
	TRINITY_DN10200_c0_g1_i5	1	p3	(CCT)6	18	187	204
	TRINITY_DN10267_c0_g1_i2	1	p3	(GCC)6	18	252	269
	TRINITY_DN10267_c0_g1_i4	1	p3	(GCC)6	18	252	269
	TRINITY_DN10250_c0_g1_i9	1	p2	(TG)23	46	860	905
	TRINITY_DN10250_c0_g1_i10	1	p3	(CGC)5	15	242	256
	TRINITY_DN10250_c0_g1_i8	1	p2	(TG)11	22	836	857
	TRINITY_DN10250_c0_g1_i1	1	p3	(CGC)5	15	242	256
	TRINITY_DN10250_c0_g2_i3	1	c	(TG)9gcttcttcattgtgtatggacatatgtatatgagttgctgtgtggataataatttaaggcgtgtggcttgattaagaat(A)10	107	701	807
	TRINITY_DN10250_c0_g2_i2	1	p2	(GT)12	24	537	560
	TRINITY_DN10250_c0_g2_i1	1	p2	(TG)9	18	701	718
	TRINITY_DN10250_c2_g1_i1	1	p2	(CA)11	22	45	66
	TRINITY_DN10261_c0_g2_i1	1	p1	(A)10	10	199	208
	TRINITY_DN10261_c0_g3_i1	1	p2	(CA)6	12	46	57
	TRINITY_DN10261_c3_g1_i1	1	c*	(C)11(CA)7*	24	1062	1085
	TRINITY_DN10229_c0_g1_i5	1	p3	(CGC)5	15	270	284
	TRINITY_DN10281_c0_g1_i1	1	p3	(CGG)6	18	39	56
	TRINITY_DN10281_c0_g1_i2	1	p3	(CGG)6	18	39	56
	TRINITY_DN10281_c0_g1_i3	1	p1	(T)10	10	898	907
	TRINITY_DN10281_c1_g1_i4	1	p3	(CGG)8	24	87	110
	TRINITY_DN10281_c1_g1_i2	1	p3	(CGG)8	24	87	110
	TRINITY_DN10281_c1_g1_i6	1	p3	(CGG)8	24	87	110
	TRINITY_DN10281_c1_g1_i1	1	p3	(CGG)8	24	87	110
	TRINITY_DN10281_c2_g1_i1	1	p3	(ATT)5	15	7	21
	TRINITY_DN10281_c2_g1_i1	2	p3	(GCG)7	21	581	601
	TRINITY_DN10269_c0_g1_i15	1	p1	(T)10	10	1719	1728
	TRINITY_DN10269_c0_g1_i11	1	p1	(A)11	11	1034	1044
	TRINITY_DN10269_c0_g1_i5	1	p1	(A)11	11	1140	1150
	TRINITY_DN10269_c0_g1_i8	1	p1	(T)10	10	2963	2972
	TRINITY_DN10269_c0_g1_i12	1	p1	(A)11	11	1034	1044
	TRINITY_DN10269_c0_g1_i9	1	p1	(T)10	10	1825	1834
	TRINITY_DN10269_c0_g1_i10	1	p1	(A)11	11	1140	1150
	TRINITY_DN10269_c0_g1_i10	2	p1	(T)10	10	2963	2972
	TRINITY_DN10269_c0_g1_i16	1	p1	(A)11	11	1034	1044
	TRINITY_DN10269_c0_g1_i13	1	p1	(A)11	11	1140	1150
	TRINITY_DN10269_c0_g1_i3	1	p1	(T)10	10	1718	1727
	TRINITY_DN10262_c0_g1_i1	1	p2	(GA)8	16	47	62
	TRINITY_DN10262_c0_g1_i5	1	p2	(GA)8	16	47	62
	TRINITY_DN10223_c0_g1_i3	1	p3	(ACT)5	15	1222	1236
	TRINITY_DN10223_c0_g1_i2	1	p3	(ACT)5	15	1222	1236
	TRINITY_DN10223_c0_g1_i7	1	p3	(ACT)5	15	1222	1236
	TRINITY_DN10223_c0_g1_i11	1	p3	(ACT)5	15	1253	1267
	TRINITY_DN10223_c0_g1_i1	1	p3	(ACT)5	15	815	829
	TRINITY_DN10223_c0_g1_i5	1	p3	(ACT)5	15	1222	1236
	TRINITY_DN10223_c0_g1_i6	1	p3	(ACT)5	15	1253	1267
	TRINITY_DN10223_c0_g1_i9	1	p3	(ACT)5	15	1210	1224
	TRINITY_DN10257_c0_g1_i7	1	p2	(TC)6	12	35	46
	TRINITY_DN10257_c0_g1_i7	2	p3	(CGC)5	15	228	242
	TRINITY_DN10257_c0_g1_i6	1	p2	(TC)6	12	35	46
	TRINITY_DN10257_c0_g1_i6	2	p3	(CGC)5	15	228	242
	TRINITY_DN10257_c0_g1_i8	1	p2	(TC)6	12	35	46
	TRINITY_DN10257_c0_g1_i8	2	p3	(CGC)5	15	228	242
	TRINITY_DN10257_c0_g1_i1	1	p3	(CGC)5	15	228	242
	TRINITY_DN10257_c0_g1_i10	1	p2	(TC)6	12	35	46
	TRINITY_DN10257_c0_g1_i10	2	p3	(CGC)5	15	228	242
	TRINITY_DN10217_c0_g1_i2	1	p3	(GCC)5	15	409	423
	TRINITY_DN10217_c0_g1_i3	1	p3	(GCC)5	15	412	426
	TRINITY_DN10217_c0_g1_i5	1	p3	(CGC)5	15	218	232
	TRINITY_DN10273_c0_g1_i1	1	p3	(CTC)5	15	186	200
	TRINITY_DN10268_c0_g1_i9	1	p2	(TG)6	12	1580	1591
	TRINITY_DN10268_c0_g1_i9	2	p2	(GC)6	12	1705	1716
	TRINITY_DN10268_c0_g1_i2	1	p2	(TG)6	12	1526	1537
	TRINITY_DN10268_c0_g1_i1	1	p2	(TG)6	12	1575	1586
	TRINITY_DN10268_c0_g1_i1	2	p2	(GC)6	12	1700	1711
	TRINITY_DN10268_c0_g1_i7	1	p2	(TG)6	12	1580	1591
	TRINITY_DN10268_c0_g1_i15	1	p2	(TG)6	12	1521	1532
	TRINITY_DN10268_c0_g1_i10	1	p2	(TG)6	12	1575	1586
	TRINITY_DN10268_c0_g1_i3	1	p2	(TG)6	12	117	128
	TRINITY_DN10268_c0_g1_i4	1	p2	(TG)6	12	1521	1532
	TRINITY_DN10206_c0_g1_i2	1	p2	(CT)6	12	18	29
	TRINITY_DN10206_c0_g1_i2	2	p3	(CAC)7	21	251	271
	TRINITY_DN10206_c0_g1_i6	1	p2	(CT)6	12	18	29
	TRINITY_DN10206_c0_g1_i6	2	p3	(CAC)7	21	251	271
	TRINITY_DN10206_c0_g1_i1	1	p3	(CAC)7	21	101	121
	TRINITY_DN10206_c0_g1_i4	1	p2	(CT)6	12	103	114
	TRINITY_DN10206_c0_g1_i4	2	p3	(CAC)7	21	263	283
	TRINITY_DN10206_c0_g1_i5	1	c	(CT)6aaccacccactctcgtcagtcatcacccccaccacaaccccatgctctccaccatttccatcgacagttactg(CT)6	97	18	114
	TRINITY_DN10206_c0_g1_i5	2	p3	(CAC)7	21	263	283
	TRINITY_DN10206_c0_g1_i3	1	p3	(CAC)7	21	101	121
	TRINITY_DN10206_c1_g1_i1	1	p3	(CAG)5	15	489	503
	TRINITY_DN10206_c1_g1_i2	1	p3	(CAG)5	15	445	459
	TRINITY_DN10209_c0_g1_i1	1	p3	(AGG)5	15	409	423
	TRINITY_DN10209_c0_g1_i7	1	p3	(AGG)5	15	409	423
	TRINITY_DN10209_c0_g1_i2	1	p3	(AGG)5	15	409	423
	TRINITY_DN10292_c0_g1_i1	1	p3	(CCG)5	15	3566	3580
	TRINITY_DN10292_c0_g1_i8	1	p3	(CCG)5	15	2715	2729
	TRINITY_DN10292_c0_g1_i9	1	p3	(CCG)5	15	3081	3095
	TRINITY_DN10292_c0_g1_i5	1	p3	(CCG)5	15	1517	1531
	TRINITY_DN10292_c0_g1_i3	1	p3	(CCG)5	15	3451	3465
	TRINITY_DN10292_c0_g1_i7	1	p3	(CCG)5	15	3200	3214
	TRINITY_DN10294_c0_g1_i4	1	p3	(GGA)6	18	36	53
	TRINITY_DN10294_c0_g1_i14	1	p3	(GGA)6	18	36	53
	TRINITY_DN10294_c0_g1_i6	1	p3	(GGA)6	18	36	53
	TRINITY_DN10294_c0_g1_i5	1	p3	(GGA)6	18	36	53
	TRINITY_DN10294_c0_g1_i7	1	p3	(GGA)6	18	36	53
	TRINITY_DN10277_c0_g1_i3	1	p1	(A)13	13	759	771
	TRINITY_DN10277_c0_g1_i1	1	p1	(A)11	11	752	762
	TRINITY_DN10235_c0_g2_i1	1	p1	(T)10	10	935	944
	TRINITY_DN10295_c0_g1_i3	1	p1	(T)10	10	205	214
	TRINITY_DN10295_c0_g1_i9	1	p1	(T)10	10	205	214
	TRINITY_DN10295_c0_g1_i11	1	p1	(T)10	10	205	214
	TRINITY_DN10295_c0_g1_i8	1	p1	(T)10	10	205	214
	TRINITY_DN10233_c0_g1_i4	1	p1	(T)11	11	2039	2049
	TRINITY_DN10233_c0_g1_i2	1	p1	(T)11	11	2033	2043
	TRINITY_DN10233_c0_g1_i3	1	p1	(T)11	11	3539	3549
	TRINITY_DN10265_c0_g1_i1	1	p3	(TCC)7	21	653	673
	TRINITY_DN10220_c0_g1_i1	1	p3	(CAG)7	21	2462	2482
	TRINITY_DN10220_c0_g1_i6	1	p3	(CAG)7	21	2477	2497
	TRINITY_DN10220_c0_g1_i3	1	p3	(CAG)7	21	2462	2482
	TRINITY_DN10266_c0_g1_i5	1	p1	(T)10	10	1003	1012
	TRINITY_DN10249_c0_g2_i2	1	p2	(AG)8	16	786	801
	TRINITY_DN10249_c0_g2_i1	1	p2	(AG)8	16	786	801
	TRINITY_DN10224_c0_g1_i2	1	p2	(TC)7	14	141	154
	TRINITY_DN10224_c0_g1_i5	1	p2	(TC)7	14	141	154
	TRINITY_DN10224_c0_g1_i1	1	p2	(TC)7	14	141	154
	TRINITY_DN10224_c0_g1_i3	1	p2	(TC)7	14	141	154
	TRINITY_DN10224_c0_g1_i4	1	p2	(TC)7	14	141	154
	TRINITY_DN10224_c0_g2_i1	1	p3	(TCC)5	15	34	48
	TRINITY_DN10224_c0_g2_i6	1	p3	(TCC)5	15	34	48
	TRINITY_DN10212_c0_g1_i2	1	p3	(GGC)5	15	913	927
	TRINITY_DN10212_c0_g1_i3	1	p3	(GGC)5	15	636	650
	TRINITY_DN10212_c0_g1_i1	1	p3	(GGC)5	15	913	927
	TRINITY_DN10212_c0_g1_i5	1	p3	(GCG)5	15	484	498
	TRINITY_DN10212_c0_g1_i5	2	p3	(GGC)5	15	919	933
	TRINITY_DN10212_c0_g1_i4	1	p3	(GCG)5	15	490	504
	TRINITY_DN10212_c0_g1_i4	2	p3	(GGC)5	15	925	939
	TRINITY_DN10212_c1_g1_i2	1	p3	(GCG)7	21	140	160
	TRINITY_DN10212_c1_g1_i4	1	c	(GCG)7gggggnnnnnnnnnnnnnnnnnnnnnacgatccgacgatgcggacgaggagtacctcccgtccgacgggggcggcggcgaggaa(GAG)5	120	188	307
	TRINITY_DN10212_c1_g1_i1	1	c	(GCG)7gggggggccaagagaaaacagaagaaacgatccgacgatgcggacgaggagtacctcccgtccgacgggggcggcggcgaggaa(GAG)5	120	195	314
	TRINITY_DN10212_c1_g1_i5	1	c	(GCG)7gggggggccaagagaaaacagaagaaacgatccgacgatgcggnnnnggagtacctcccgtccgacgggggcggcggcgaggaa(GAG)5	120	195	314
	TRINITY_DN10252_c0_g1_i10	1	p3	(CGG)6	18	189	206
	TRINITY_DN10252_c0_g1_i8	1	p3	(CGG)6	18	189	206
	TRINITY_DN10252_c0_g1_i8	2	p1	(T)10	10	2218	2227
	TRINITY_DN10252_c0_g1_i1	1	p3	(CGG)6	18	189	206
	TRINITY_DN10252_c0_g1_i6	1	p1	(T)10	10	2232	2241
	TRINITY_DN10252_c0_g1_i4	1	p3	(CGG)6	18	189	206
	TRINITY_DN10252_c0_g1_i4	2	p1	(T)10	10	2221	2230
	TRINITY_DN10252_c0_g1_i5	1	p3	(CGG)6	18	189	206
	TRINITY_DN10252_c0_g1_i2	1	p3	(CGG)6	18	189	206
	TRINITY_DN10252_c0_g1_i3	1	p3	(CGG)6	18	189	206
	TRINITY_DN10237_c1_g1_i3	1	p3	(GGC)6	18	58	75
	TRINITY_DN10237_c1_g1_i2	1	p3	(GGC)6	18	58	75
	TRINITY_DN10237_c1_g1_i1	1	p3	(GGC)5	15	66	80
	TRINITY_DN10296_c0_g1_i2	1	p3	(GCC)5	15	56	70
	TRINITY_DN10242_c1_g1_i1	1	p2	(GA)10	20	27	46
	TRINITY_DN10242_c1_g1_i2	1	p2	(GA)10	20	27	46
	TRINITY_DN10242_c1_g1_i5	1	p2	(GA)10	20	27	46
	TRINITY_DN10242_c1_g1_i4	1	p2	(GA)10	20	27	46
	TRINITY_DN10260_c1_g1_i5	1	p3	(CGA)5	15	45	59
	TRINITY_DN10219_c0_g1_i9	1	p3	(CGC)5	15	233	247
	TRINITY_DN10219_c0_g1_i11	1	p3	(CGC)5	15	233	247
	TRINITY_DN10219_c0_g1_i8	1	p3	(CGC)5	15	233	247
	TRINITY_DN10219_c0_g1_i10	1	p3	(CGC)5	15	233	247
	TRINITY_DN10246_c0_g1_i2	1	p3	(GCC)5	15	252	266
	TRINITY_DN10246_c0_g1_i9	1	p3	(GCC)5	15	252	266
	TRINITY_DN10246_c0_g1_i10	1	p3	(GCC)5	15	252	266
	TRINITY_DN10246_c0_g1_i11	1	p3	(GCC)5	15	252	266
	TRINITY_DN10246_c0_g1_i5	1	p3	(GCC)5	15	252	266
	TRINITY_DN10246_c0_g1_i7	1	p3	(GCC)5	15	252	266
	TRINITY_DN10246_c0_g1_i4	1	p3	(GCC)5	15	252	266
	TRINITY_DN10279_c0_g1_i2	1	p3	(CTC)5	15	35	49
	TRINITY_DN10279_c0_g1_i3	1	p3	(CTC)5	15	35	49
	TRINITY_DN10279_c0_g1_i1	1	p3	(CTC)5	15	35	49
	TRINITY_DN10274_c2_g1_i1	1	p1	(A)13	13	208	220
	TRINITY_DN38668_c0_g1_i1	1	p2	(GT)6	12	659	670
	TRINITY_DN38668_c0_g1_i2	1	p2	(GT)6	12	659	670
	TRINITY_DN38686_c0_g1_i2	1	p3	(TAG)6	18	1195	1212
	TRINITY_DN38602_c0_g1_i2	1	p2	(CA)6	12	68	79
	TRINITY_DN38602_c0_g1_i1	1	p2	(CA)6	12	68	79
[truncated: 1,007 more rows]

## Sheet: Mutant-R1
		Table S14 List of Simple Sequence Repeats (SSRs) identified in assembled transcript sequences of wheat mutant (M3)
		ID	SSR nr.	SSR type	SSR	size	start	end
		TRINITY_DN69561_c0_g1_i2	1	p1	(T)10	10	479	488
		TRINITY_DN69561_c0_g1_i5	1	p1	(T)10	10	584	593
		TRINITY_DN69501_c0_g1_i1	1	p1	(A)14	14	265	278
		TRINITY_DN69503_c0_g1_i1	1	p4	(TATT)5	20	52	71
		TRINITY_DN69522_c0_g1_i4	1	p3	(CCG)6	18	158	175
		TRINITY_DN69522_c0_g1_i3	1	p3	(CCG)6	18	158	175
		TRINITY_DN69522_c0_g1_i6	1	p3	(CCG)6	18	232	249
		TRINITY_DN69522_c0_g1_i1	1	p3	(CCG)6	18	158	175
		TRINITY_DN69522_c0_g1_i2	1	p3	(CCG)6	18	232	249
		TRINITY_DN69595_c1_g1_i1	1	p3	(CCG)5	15	102	116
		TRINITY_DN69527_c0_g2_i2	1	p3	(GGC)5	15	108	122
		TRINITY_DN69527_c0_g2_i1	1	p3	(GGC)5	15	97	111
		TRINITY_DN69575_c0_g1_i3	1	p3	(GCG)5	15	232	246
		TRINITY_DN28078_c0_g1_i8	1	p4	(GATT)5	20	84	103
		TRINITY_DN28078_c0_g1_i2	1	p4	(GATT)5	20	89	108
		TRINITY_DN28078_c0_g1_i5	1	p4	(GATT)5	20	89	108
		TRINITY_DN28078_c0_g1_i4	1	p4	(GATT)5	20	89	108
		TRINITY_DN28030_c0_g1_i1	1	c	(TCC)5(CT)19gcatggatgcgtaatggcacat(GCA)5	90	51	140
		TRINITY_DN28030_c0_g1_i6	1	c	(TCC)5(CT)19	53	51	103
		TRINITY_DN28030_c0_g1_i5	1	c	(TCC)5(CT)19	53	51	103
		TRINITY_DN28030_c0_g1_i4	1	c	(TCC)5(CT)19gcatggatgcgtaatggcacat(GCA)5	90	51	140
		TRINITY_DN28030_c0_g1_i2	1	c	(TCC)5(CT)19gcgtgatgcgtaatggcacat(GCA)6	92	51	142
		TRINITY_DN28092_c0_g1_i2	1	p3	(TTC)6	18	238	255
		TRINITY_DN28092_c0_g2_i2	1	p3	(TTC)11	33	584	616
		TRINITY_DN28090_c0_g1_i5	1	p2	(TG)10	20	1304	1323
		TRINITY_DN28090_c0_g1_i5	2	p1	(T)10	10	1475	1484
		TRINITY_DN28090_c0_g1_i4	1	p2	(TG)6	12	1308	1319
		TRINITY_DN28090_c0_g1_i11	1	p2	(TG)12	24	1286	1309
		TRINITY_DN28090_c0_g1_i2	1	p2	(TG)10	20	1310	1329
		TRINITY_DN28090_c0_g1_i2	2	p1	(T)10	10	1481	1490
		TRINITY_DN28068_c0_g1_i6	1	p2	(CG)6	12	309	320
		TRINITY_DN28068_c0_g1_i8	1	p2	(CG)6	12	309	320
		TRINITY_DN28068_c0_g1_i7	1	p2	(CG)6	12	309	320
		TRINITY_DN28068_c0_g1_i2	1	p2	(CG)6	12	309	320
		TRINITY_DN28068_c0_g1_i11	1	p2	(CG)6	12	309	320
		TRINITY_DN28039_c0_g1_i2	1	c	(CG)7tgccgtataaagtctcccacagctcacacgggcagccgcctgcctagctagccgctggtagaggaggagaagccgt(AG)8ttcagagaggagatagagagttcagagaggagat(AG)6ttcagagag(GA)6gttcagagaggagacagagg(GA)7	207	221	427
		TRINITY_DN28039_c0_g1_i3	1	c	(AG)8ttcagagaggagatagagagttcagagaggagat(AG)6ttcagagag(GA)6gttcagagaggagacagagg(GA)7	117	226	342
		TRINITY_DN28039_c0_g1_i1	1	p2	(CG)6	12	218	229
		TRINITY_DN28039_c0_g1_i1	2	c	(AG)12ggagagagttcagagag(GA)6	53	331	383
		TRINITY_DN28066_c0_g1_i3	1	p2	(CT)9	18	311	328
		TRINITY_DN28002_c0_g1_i1	1	p1	(T)10	10	43	52
		TRINITY_DN28079_c0_g2_i8	1	p1	(T)10	10	1684	1693
		TRINITY_DN28044_c3_g1_i1	1	p2	(CA)7	14	48	61
		TRINITY_DN28059_c0_g1_i1	1	p2	(CT)7	14	54	67
		TRINITY_DN28083_c0_g1_i1	1	p3	(GCA)5	15	287	301
		TRINITY_DN28071_c0_g1_i6	1	p2	(CT)8	16	8	23
		TRINITY_DN28071_c0_g1_i8	1	p2	(CT)8	16	53	68
		TRINITY_DN28036_c0_g1_i8	1	p1	(T)10	10	1607	1616
		TRINITY_DN28036_c0_g1_i1	1	p1	(T)10	10	1149	1158
		TRINITY_DN28036_c0_g1_i2	1	p1	(T)10	10	771	780
		TRINITY_DN28011_c1_g1_i1	1	p4	(AAGG)6	24	114	137
		TRINITY_DN28025_c0_g1_i9	1	p3	(TTG)7	21	9	29
		TRINITY_DN28050_c0_g2_i1	1	p2	(TC)6	12	320	331
		TRINITY_DN28098_c1_g1_i1	1	p3	(GCC)5	15	122	136
		TRINITY_DN28069_c0_g2_i1	1	p2	(GT)6	12	32	43
		TRINITY_DN91563_c1_g1_i1	1	p1	(T)11	11	247	257
		TRINITY_DN91536_c0_g1_i4	1	p3	(TTG)6	18	439	456
		TRINITY_DN91536_c0_g1_i1	1	p4	(TACA)6	24	33	56
		TRINITY_DN91536_c0_g1_i3	1	p4	(TACA)7	28	29	56
		TRINITY_DN91536_c0_g1_i2	1	p4	(TACA)6	24	33	56
		TRINITY_DN91525_c0_g1_i1	1	p3	(AAG)6	18	592	609
		TRINITY_DN91525_c0_g1_i2	1	p3	(AAG)6	18	265	282
		TRINITY_DN91562_c0_g1_i1	1	p4	(TACA)6	24	1032	1055
		TRINITY_DN91590_c0_g1_i1	1	p3	(CGG)5	15	352	366
		TRINITY_DN91560_c0_g1_i5	1	p3	(TGC)5	15	43	57
		TRINITY_DN30140_c0_g3_i1	1	p3	(CTC)5	15	101	115
		TRINITY_DN30190_c0_g1_i1	1	c	(CGA)5catcaacacgaccttgtggaagctccgatgccgacgacgtagacgcgtggcatatat(TG)9	90	137	226
		TRINITY_DN30101_c0_g1_i1	1	p3	(CAC)6	18	96	113
		TRINITY_DN30101_c0_g1_i1	2	p3	(GGA)5	15	516	530
		TRINITY_DN30101_c0_g1_i2	1	p3	(GGA)5	15	516	530
		TRINITY_DN30101_c0_g2_i6	1	p2	(TC)6	12	133	144
		TRINITY_DN30101_c0_g2_i6	2	c	(CT)11cc(CT)6	36	326	361
		TRINITY_DN30101_c0_g2_i6	3	p3	(CCA)5	15	1484	1498
		TRINITY_DN30101_c0_g2_i6	4	p3	(TTC)6	18	1670	1687
		TRINITY_DN30101_c0_g2_i4	1	c	(CT)6agacaatat(AG)6gggaggttataagagttgagaagagaggcatccaaaagacaaagccggctaggttttctccagacatccctcttgt(TC)6	121	24	144
		TRINITY_DN30101_c0_g2_i4	2	c	(CT)11cc(CT)6	36	326	361
		TRINITY_DN30101_c0_g2_i4	3	p3	(CCA)5	15	1484	1498
		TRINITY_DN30101_c0_g2_i4	4	p3	(TTC)6	18	1678	1695
		TRINITY_DN30101_c0_g2_i8	1	p2	(TC)6	12	133	144
		TRINITY_DN30101_c0_g2_i8	2	c	(CT)11cc(CT)6	36	326	361
		TRINITY_DN30101_c1_g1_i2	1	p2	(TC)7	14	178	191
		TRINITY_DN30170_c0_g3_i2	1	p1	(T)10	10	491	500
		TRINITY_DN30138_c0_g1_i2	1	p4	(TTGC)5	20	47	66
		TRINITY_DN30172_c0_g1_i3	1	p2	(GT)6	12	42	53
		TRINITY_DN30172_c0_g1_i1	1	p2	(GT)6	12	42	53
		TRINITY_DN30172_c1_g3_i1	1	c	(AT)6(AC)6	24	41	64
		TRINITY_DN30172_c2_g1_i1	1	p3	(GCC)5	15	128	142
		TRINITY_DN30121_c0_g1_i7	1	p2	(GA)9	18	50	67
		TRINITY_DN30121_c0_g1_i8	1	p2	(GA)9	18	50	67
		TRINITY_DN30155_c0_g1_i1	1	p2	(CA)11	22	139	160
		TRINITY_DN30125_c0_g1_i3	1	p3	(GAG)5	15	486	500
		TRINITY_DN30161_c0_g3_i1	1	p3	(AGG)5	15	407	421
		TRINITY_DN144_c0_g1_i10	1	p4	(CATC)5	20	194	213
		TRINITY_DN144_c0_g1_i7	1	p4	(CATC)5	20	194	213
		TRINITY_DN144_c0_g1_i8	1	p4	(CATC)5	20	194	213
		TRINITY_DN144_c0_g1_i6	1	p4	(CATC)5	20	194	213
		TRINITY_DN144_c0_g1_i2	1	p4	(CATC)5	20	194	213
		TRINITY_DN144_c0_g1_i3	1	p4	(CATC)5	20	194	213
		TRINITY_DN144_c0_g1_i4	1	p4	(CATC)5	20	194	213
		TRINITY_DN144_c0_g1_i11	1	p4	(CATC)5	20	194	213
		TRINITY_DN144_c0_g1_i13	1	p4	(CATC)5	20	194	213
		TRINITY_DN179_c1_g1_i1	1	p3	(TGA)5	15	442	456
		TRINITY_DN179_c1_g1_i2	1	p3	(TGA)5	15	442	456
		TRINITY_DN153_c0_g1_i9	1	p1	(A)14	14	2921	2934
		TRINITY_DN194_c0_g2_i1	1	p2	(GA)6	12	285	296
		TRINITY_DN177_c1_g2_i1	1	p1	(C)10	10	220	229
		TRINITY_DN184_c2_g1_i1	1	p1	(A)10	10	197	206
		TRINITY_DN151_c0_g1_i1	1	p1	(A)11	11	1382	1392
		TRINITY_DN193_c0_g1_i7	1	p1	(A)10	10	35	44
		TRINITY_DN193_c0_g1_i7	2	p2	(CG)6	12	197	208
		TRINITY_DN193_c0_g1_i6	1	p2	(CG)6	12	197	208
		TRINITY_DN193_c0_g1_i11	1	p1	(A)10	10	38	47
		TRINITY_DN193_c0_g1_i9	1	p2	(CG)6	12	197	208
		TRINITY_DN193_c0_g1_i4	1	p1	(A)10	10	38	47
		TRINITY_DN193_c0_g1_i5	1	p1	(A)10	10	38	47
		TRINITY_DN122_c0_g1_i2	1	p3	(CTC)5	15	1026	1040
		TRINITY_DN122_c0_g1_i8	1	p3	(CTC)5	15	997	1011
		TRINITY_DN122_c0_g1_i9	1	p3	(CTC)5	15	997	1011
		TRINITY_DN122_c0_g1_i4	1	p3	(CTC)5	15	1035	1049
		TRINITY_DN122_c0_g1_i5	1	p3	(CTC)5	15	1026	1040
		TRINITY_DN139_c0_g1_i3	1	p4	(TGTA)5	20	1941	1960
		TRINITY_DN139_c0_g1_i3	2	p1	(A)10	10	2118	2127
		TRINITY_DN138_c0_g1_i3	1	p4	(AGGA)6	24	33	56
		TRINITY_DN138_c0_g1_i7	1	p2	(TA)6	12	1879	1890
		TRINITY_DN198_c0_g1_i6	1	p1	(T)11	11	2375	2385
		TRINITY_DN198_c0_g1_i7	1	p1	(T)11	11	2355	2365
		TRINITY_DN100_c0_g1_i3	1	p1	(T)10	10	5984	5993
		TRINITY_DN100_c0_g2_i1	1	p3	(TCC)5	15	245	259
		TRINITY_DN125_c0_g1_i10	1	p1	(T)10	10	1044	1053
		TRINITY_DN132_c0_g2_i4	1	p1	(T)10	10	1224	1233
		TRINITY_DN164_c2_g1_i2	1	p3	(GAA)8	24	249	272
		TRINITY_DN164_c2_g2_i2	1	p3	(GAA)7	21	38	58
		TRINITY_DN164_c2_g2_i3	1	p3	(GAA)7	21	38	58
		TRINITY_DN164_c2_g2_i1	1	p3	(AAG)5	15	132	146
		TRINITY_DN140_c0_g1_i8	1	p2	(CA)17	34	41	74
		TRINITY_DN140_c0_g1_i7	1	p2	(CA)6	12	63	74
		TRINITY_DN189_c0_g2_i4	1	p1	(T)11	11	2360	2370
		TRINITY_DN121_c0_g3_i1	1	p3	(TTG)5	15	846	860
		TRINITY_DN121_c1_g1_i1	1	p3	(TTG)5	15	126	140
		TRINITY_DN121_c1_g1_i2	1	p3	(TTG)5	15	241	255
		TRINITY_DN176_c1_g1_i1	1	p2	(CT)12	24	268	291
		TRINITY_DN176_c1_g1_i5	1	p2	(CT)6	12	274	285
		TRINITY_DN176_c1_g1_i3	1	p2	(CT)14	28	274	301
		TRINITY_DN176_c1_g1_i4	1	p2	(CT)14	28	274	301
		TRINITY_DN176_c1_g1_i2	1	p2	(CT)14	28	268	295
		TRINITY_DN176_c4_g1_i1	1	p2	(CT)8	16	343	358
		TRINITY_DN187_c0_g1_i1	1	p2	(AC)8	16	26	41
		TRINITY_DN187_c0_g1_i2	1	p2	(CA)8	16	25	40
		TRINITY_DN187_c1_g1_i6	1	p3	(ACG)5	15	322	336
		TRINITY_DN187_c1_g1_i2	1	p3	(ACG)5	15	322	336
		TRINITY_DN187_c1_g1_i7	1	p3	(ACG)5	15	322	336
		TRINITY_DN187_c1_g1_i9	1	p3	(ACG)5	15	336	350
		TRINITY_DN187_c1_g1_i5	1	p3	(ACG)5	15	336	350
		TRINITY_DN187_c1_g1_i10	1	p3	(ACG)5	15	336	350
		TRINITY_DN187_c1_g1_i4	1	p3	(ACG)5	15	336	350
		TRINITY_DN187_c1_g1_i8	1	p3	(ACG)5	15	322	336
		TRINITY_DN115_c0_g1_i8	1	c	(TG)9tcggtc(T)10	34	465	498
		TRINITY_DN119_c0_g1_i19	1	p2	(TC)6	12	88	99
		TRINITY_DN119_c0_g1_i2	1	p2	(TC)6	12	88	99
		TRINITY_DN119_c0_g1_i14	1	p2	(TC)6	12	88	99
		TRINITY_DN119_c0_g1_i4	1	p2	(TC)11	22	53	74
		TRINITY_DN119_c0_g1_i22	1	p2	(TC)6	12	88	99
		TRINITY_DN133_c0_g1_i3	1	c	(CCA)5(CAA)5	30	45	74
		TRINITY_DN133_c0_g1_i3	2	p2	(TG)12	24	550	573
		TRINITY_DN133_c0_g1_i1	1	c	(CCA)5(CAA)5	30	45	74
		TRINITY_DN133_c0_g1_i2	1	c	(CCA)5(CAA)5	30	45	74
		TRINITY_DN133_c1_g1_i2	1	p2	(TG)23	46	942	987
		TRINITY_DN133_c1_g1_i4	1	p2	(TG)6	12	942	953
		TRINITY_DN133_c1_g1_i1	1	p2	(TG)6	12	938	949
		TRINITY_DN133_c1_g1_i3	1	p2	(TG)23	46	942	987
		TRINITY_DN104_c0_g1_i5	1	p3	(TGC)5	15	1110	1124
		TRINITY_DN131_c0_g1_i4	1	p3	(CGG)6	18	71	88
		TRINITY_DN131_c0_g1_i1	1	p3	(CGG)6	18	71	88
		TRINITY_DN131_c0_g1_i2	1	p3	(CGG)6	18	71	88
		TRINITY_DN131_c0_g1_i5	1	p3	(CGG)6	18	71	88
		TRINITY_DN131_c0_g1_i3	1	p3	(CGG)6	18	71	88
		TRINITY_DN131_c2_g1_i3	1	p2	(TC)14	28	206	233
		TRINITY_DN150_c0_g1_i4	1	p2	(TG)7	14	1783	1796
		TRINITY_DN150_c0_g1_i1	1	p2	(TG)7	14	1783	1796
		TRINITY_DN185_c0_g1_i7	1	p1	(A)10	10	3164	3173
		TRINITY_DN185_c0_g1_i1	1	p1	(A)12	12	3174	3185
		TRINITY_DN169_c0_g1_i6	1	p3	(TGG)5	15	446	460
		TRINITY_DN169_c0_g1_i1	1	p3	(TGG)5	15	446	460
		TRINITY_DN145_c0_g1_i1	1	p3	(TAC)6	18	1673	1690
		TRINITY_DN163_c0_g3_i3	1	p3	(GCG)5	15	287	301
		TRINITY_DN163_c0_g4_i1	1	p3	(GCC)5	15	144	158
		TRINITY_DN175_c0_g1_i2	1	p3	(CGG)5	15	158	172
		TRINITY_DN175_c0_g1_i5	1	p3	(CGG)5	15	158	172
		TRINITY_DN175_c0_g1_i7	1	p3	(CGG)5	15	158	172
		TRINITY_DN181_c0_g1_i7	1	p1	(A)11	11	277	287
		TRINITY_DN181_c0_g1_i7	2	p2	(GT)6	12	1261	1272
		TRINITY_DN181_c0_g1_i1	1	p2	(GT)6	12	1336	1347
		TRINITY_DN107_c0_g1_i10	1	p1	(T)11	11	1101	1111
		TRINITY_DN107_c0_g1_i6	1	p1	(T)11	11	1101	1111
		TRINITY_DN107_c0_g1_i11	1	p1	(A)12	12	1005	1016
		TRINITY_DN107_c0_g1_i18	1	p1	(T)11	11	1101	1111
		TRINITY_DN188_c1_g1_i3	1	p3	(GCT)5	15	340	354
		TRINITY_DN188_c1_g1_i3	2	p2	(TC)6	12	510	521
		TRINITY_DN188_c1_g1_i6	1	p3	(GCT)5	15	340	354
		TRINITY_DN188_c1_g1_i6	2	p2	(TC)6	12	510	521
		TRINITY_DN188_c1_g1_i4	1	p2	(TC)6	12	198	209
		TRINITY_DN188_c1_g1_i10	1	p2	(TC)6	12	198	209
		TRINITY_DN188_c4_g1_i4	1	p2	(TC)17	34	48	81
		TRINITY_DN188_c4_g1_i1	1	p2	(TC)23	46	284	329
		TRINITY_DN188_c5_g1_i5	1	c	(C)12(TC)7	26	186	211
		TRINITY_DN108_c1_g2_i2	1	p3	(CAG)5	15	49	63
		TRINITY_DN118_c1_g1_i2	1	p3	(GAA)5	15	1074	1088
		TRINITY_DN118_c1_g1_i1	1	p3	(AGA)7	21	1070	1090
		TRINITY_DN155_c0_g1_i10	1	p1	(T)10	10	3615	3624
		TRINITY_DN155_c0_g1_i1	1	p1	(T)10	10	3618	3627
		TRINITY_DN155_c0_g1_i9	1	p3	(CAG)5	15	25	39
		TRINITY_DN142_c0_g1_i5	1	p1	(T)10	10	1986	1995
		TRINITY_DN142_c0_g1_i8	1	p3	(CCT)6	18	835	852
		TRINITY_DN142_c0_g1_i8	2	p1	(T)10	10	1994	2003
		TRINITY_DN142_c0_g1_i9	1	p1	(T)10	10	1994	2003
		TRINITY_DN142_c0_g1_i6	1	p3	(CCT)6	18	836	853
		TRINITY_DN142_c0_g1_i6	2	p1	(T)10	10	1995	2004
		TRINITY_DN142_c0_g1_i1	1	p5	(TTTCT)6	30	2000	2029
		TRINITY_DN142_c0_g1_i10	1	p1	(T)10	10	2004	2013
		TRINITY_DN171_c0_g1_i3	1	p1	(T)10	10	1103	1112
		TRINITY_DN171_c0_g1_i7	1	p1	(T)10	10	1085	1094
		TRINITY_DN171_c0_g1_i10	1	p3	(CTC)5	15	133	147
		TRINITY_DN171_c0_g1_i4	1	p1	(T)10	10	1109	1118
		TRINITY_DN171_c0_g1_i6	1	p3	(CTC)5	15	133	147
		TRINITY_DN171_c0_g1_i6	2	p1	(T)10	10	1088	1097
		TRINITY_DN161_c0_g2_i3	1	p3	(CCG)5	15	220	234
		TRINITY_DN161_c0_g2_i3	2	p3	(CCA)6	18	2081	2098
		TRINITY_DN161_c0_g2_i2	1	p3	(CCG)5	15	220	234
		TRINITY_DN161_c0_g2_i2	2	p3	(CCA)6	18	2081	2098
		TRINITY_DN161_c0_g2_i1	1	p3	(CCG)5	15	220	234
		TRINITY_DN161_c0_g2_i1	2	p3	(CCA)6	18	2081	2098
		TRINITY_DN161_c0_g3_i1	1	p3	(GGC)5	15	423	437
		TRINITY_DN101_c0_g1_i1	1	p2	(GT)7	14	903	916
		TRINITY_DN123_c0_g1_i2	1	p3	(AGG)5	15	104	118
		TRINITY_DN123_c0_g1_i1	1	p3	(AGG)5	15	104	118
		TRINITY_DN123_c0_g2_i1	1	p3	(AGG)5	15	284	298
		TRINITY_DN123_c0_g2_i2	1	p3	(AGG)5	15	284	298
		TRINITY_DN124_c1_g1_i1	1	p3	(ACA)5	15	644	658
		TRINITY_DN110_c0_g1_i4	1	p3	(CGA)6	18	39	56
		TRINITY_DN110_c0_g1_i2	1	p3	(GAC)5	15	449	463
		TRINITY_DN110_c0_g1_i3	1	p3	(CGA)6	18	39	56
		TRINITY_DN110_c0_g1_i1	1	p3	(GAC)5	15	449	463
		TRINITY_DN113_c0_g2_i2	1	p3	(GCC)7	21	30	50
		TRINITY_DN111_c0_g2_i7	1	p1	(T)11	11	1193	1203
		TRINITY_DN111_c0_g2_i2	1	p1	(T)11	11	1232	1242
		TRINITY_DN111_c2_g1_i1	1	p3	(CAG)5	15	179	193
		TRINITY_DN103_c0_g1_i5	1	p3	(AAG)5	15	831	845
		TRINITY_DN103_c0_g1_i4	1	p3	(AAG)5	15	831	845
		TRINITY_DN103_c0_g1_i3	1	p2	(CG)6	12	86	97
		TRINITY_DN103_c0_g1_i3	2	p3	(AAG)5	15	831	845
		TRINITY_DN103_c0_g1_i6	1	p3	(AAG)5	15	590	604
		TRINITY_DN103_c0_g1_i2	1	p3	(AAG)5	15	831	845
		TRINITY_DN103_c0_g1_i1	1	p3	(AAG)5	15	590	604
		TRINITY_DN103_c0_g2_i2	1	p3	(AGG)5	15	339	353
		TRINITY_DN103_c0_g2_i1	1	p3	(AGG)5	15	339	353
		TRINITY_DN88680_c0_g1_i2	1	p3	(TTG)6	18	274	291
		TRINITY_DN88680_c2_g1_i1	1	p3	(TTG)5	15	342	356
		TRINITY_DN88622_c0_g1_i2	1	p1	(T)10	10	233	242
		TRINITY_DN88647_c0_g1_i1	1	p2	(AC)6	12	116	127
		TRINITY_DN88602_c0_g1_i5	1	p3	(TTC)6	18	1082	1099
		TRINITY_DN88682_c0_g1_i1	1	p3	(GCC)5	15	50	64
		TRINITY_DN88643_c0_g2_i1	1	p1	(G)12	12	516	527
		TRINITY_DN88609_c0_g4_i1	1	p3	(CGG)6	18	148	165
		TRINITY_DN88609_c0_g4_i2	1	p3	(CGG)6	18	148	165
		TRINITY_DN57032_c0_g1_i2	1	p1	(A)10	10	289	298
		TRINITY_DN57057_c0_g1_i1	1	p3	(TTC)5	15	604	618
		TRINITY_DN57057_c0_g1_i2	1	p3	(TTC)5	15	394	408
		TRINITY_DN57020_c0_g1_i1	1	p2	(TC)10	20	1058	1077
		TRINITY_DN57045_c1_g1_i5	1	p3	(CCG)5	15	214	228
		TRINITY_DN57001_c0_g3_i2	1	p3	(CAG)5	15	852	866
		TRINITY_DN57098_c0_g1_i3	1	p3	(TTG)8	24	560	583
		TRINITY_DN57098_c0_g1_i5	1	p3	(TTG)8	24	175	198
		TRINITY_DN57098_c0_g1_i6	1	p3	(TGC)6	18	189	206
		TRINITY_DN59536_c0_g1_i1	1	p1	(T)10	10	67	76
		TRINITY_DN59536_c0_g2_i2	1	p2	(GT)6	12	206	217
		TRINITY_DN59536_c0_g2_i1	1	p2	(GT)6	12	209	220
		TRINITY_DN59513_c0_g1_i2	1	p2	(GT)7	14	677	690
		TRINITY_DN59513_c0_g3_i1	1	p2	(GT)7	14	194	207
		TRINITY_DN59549_c0_g1_i1	1	p1	(T)10	10	443	452
		TRINITY_DN59532_c1_g1_i1	1	p1	(A)10	10	154	163
		TRINITY_DN59564_c0_g1_i5	1	p1	(A)10	10	217	226
		TRINITY_DN59564_c0_g1_i4	1	p1	(A)10	10	217	226
		TRINITY_DN59596_c0_g1_i1	1	p2	(GA)6	12	655	666
		TRINITY_DN59596_c0_g1_i3	1	p2	(GA)6	12	496	507
		TRINITY_DN59596_c0_g1_i4	1	p2	(GA)6	12	655	666
		TRINITY_DN59596_c0_g3_i1	1	p2	(TA)8	16	447	462
		TRINITY_DN59516_c0_g1_i1	1	p3	(GTC)5	15	179	193
		TRINITY_DN59545_c0_g1_i2	1	p3	(GCC)7	21	131	151
		TRINITY_DN18702_c0_g1_i1	1	p3	(AGC)5	15	422	436
		TRINITY_DN18702_c0_g1_i4	1	p3	(AGC)5	15	422	436
		TRINITY_DN18736_c0_g2_i2	1	p2	(TC)15	30	874	903
		TRINITY_DN18736_c0_g3_i1	1	p2	(AG)9	18	97	114
		TRINITY_DN18775_c0_g1_i2	1	p5	(GCTTG)5	25	185	209
		TRINITY_DN18775_c0_g1_i9	1	p5	(GCTTG)5	25	185	209
		TRINITY_DN18775_c0_g1_i4	1	p5	(GCTTG)5	25	185	209
		TRINITY_DN18775_c1_g1_i1	1	p3	(GAG)6	18	294	311
		TRINITY_DN18742_c0_g1_i1	1	p2	(CA)8	16	827	842
		TRINITY_DN18749_c0_g1_i1	1	p3	(CCG)5	15	34	48
		TRINITY_DN18749_c0_g1_i2	1	p3	(CCG)5	15	34	48
		TRINITY_DN18778_c0_g1_i3	1	p1	(A)10	10	588	597
		TRINITY_DN18737_c0_g1_i3	1	p3	(AGG)5	15	69	83
		TRINITY_DN18737_c0_g1_i7	1	p3	(AGG)5	15	69	83
		TRINITY_DN18730_c0_g1_i6	1	p3	(TCC)6	18	33	50
		TRINITY_DN18730_c0_g1_i2	1	p2	(GA)16	32	745	776
		TRINITY_DN18730_c0_g1_i8	1	p3	(TCC)6	18	33	50
		TRINITY_DN18730_c0_g1_i8	2	p2	(GA)16	32	1395	1426
		TRINITY_DN18730_c0_g1_i1	1	p3	(TCC)6	18	33	50
		TRINITY_DN18730_c0_g1_i3	1	p3	(TCC)6	18	33	50
		TRINITY_DN18730_c0_g1_i9	1	p2	(GA)16	32	1476	1507
		TRINITY_DN18727_c0_g1_i3	1	p4	(GATG)5	20	1153	1172
		TRINITY_DN18727_c0_g1_i2	1	p5	(CCTCT)5	25	9	33
		TRINITY_DN18777_c0_g1_i1	1	p1	(T)10	10	471	480
		TRINITY_DN18741_c0_g1_i9	1	p3	(TCT)5	15	743	757
		TRINITY_DN18741_c0_g1_i1	1	p3	(TCT)5	15	681	695
		TRINITY_DN18741_c0_g1_i15	1	c	(TTC)6tgagtattcctctaggtagctctagatcaagctctggtagctgcaatggag(CTT)6	87	724	810
		TRINITY_DN18741_c0_g1_i8	1	p3	(TTC)5	15	725	739
		TRINITY_DN18741_c0_g1_i12	1	p3	(TTC)5	15	708	722
		TRINITY_DN18741_c0_g1_i5	1	c	(TTC)6tgagtattcctctaggtagctctagatcaagctctggtagctgcaatggag(CTT)6	87	786	872
		TRINITY_DN18741_c0_g1_i4	1	p3	(TTC)5	15	770	784
		TRINITY_DN18792_c0_g1_i3	1	p2	(CT)6	12	809	820
		TRINITY_DN18706_c0_g1_i6	1	p2	(CG)6	12	305	316
		TRINITY_DN18706_c0_g1_i4	1	p2	(CG)6	12	305	316
		TRINITY_DN18706_c0_g1_i11	1	p2	(GT)6	12	3112	3123
		TRINITY_DN18745_c0_g3_i2	1	p1	(A)14	14	68	81
		TRINITY_DN18703_c0_g1_i10	1	p2	(CT)7	14	369	382
		TRINITY_DN18776_c0_g1_i1	1	p1	(T)10	10	1011	1020
		TRINITY_DN18780_c0_g2_i2	1	p1	(A)12	12	35	46
		TRINITY_DN18723_c0_g1_i1	1	p2	(GT)8	16	212	227
		TRINITY_DN18770_c0_g2_i2	1	p3	(GCC)5	15	53	67
		TRINITY_DN18770_c0_g2_i7	1	p2	(TG)6	12	2958	2969
		TRINITY_DN18711_c0_g1_i10	1	p3	(GGC)5	15	669	683
		TRINITY_DN18711_c0_g1_i8	1	p3	(GGC)5	15	669	683
		TRINITY_DN18711_c0_g1_i8	2	p2	(GC)11	22	1336	1357
		TRINITY_DN18711_c0_g1_i2	1	p2	(GC)11	22	501	522
		TRINITY_DN18711_c0_g1_i14	1	p3	(GGC)5	15	669	683
		TRINITY_DN18711_c0_g1_i17	1	p2	(CT)6	12	537	548
		TRINITY_DN18711_c0_g1_i4	1	p2	(CT)6	12	537	548
		TRINITY_DN18711_c0_g1_i4	2	p3	(GGC)5	15	669	683
		TRINITY_DN18711_c0_g1_i11	1	p2	(CT)6	12	537	548
		TRINITY_DN18711_c0_g1_i11	2	p3	(GGC)5	15	669	683
		TRINITY_DN18711_c0_g1_i23	1	p2	(CT)6	12	537	548
		TRINITY_DN18711_c0_g1_i23	2	p3	(GGC)5	15	669	683
		TRINITY_DN18711_c0_g1_i19	1	p2	(GC)11	22	273	294
		TRINITY_DN18711_c2_g1_i1	1	p2	(GT)6	12	578	589
		TRINITY_DN18766_c1_g1_i1	1	p2	(CT)7	14	31	44
		TRINITY_DN18766_c1_g1_i8	1	p2	(CT)7	14	31	44
		TRINITY_DN18766_c1_g1_i5	1	p3	(ATT)7	21	130	150
		TRINITY_DN18782_c0_g1_i1	1	p2	(AG)6	12	235	246
		TRINITY_DN18743_c0_g1_i13	1	p1	(A)11	11	2142	2152
		TRINITY_DN18769_c0_g1_i5	1	p1	(A)10	10	1345	1354
		TRINITY_DN18726_c0_g1_i4	1	c	(TC)6ccgctctgctggtcggcgagaggcagcctgccatgtgggcctcgccggggaggctgccggcgat(GGA)5	91	179	269
		TRINITY_DN18726_c0_g1_i7	1	c	(TC)6ccgctctgctggtcggcgagaggcagcctgccatgtgggcctcgccggggaggctgccggcgat(GGA)5	91	179	269
		TRINITY_DN18726_c0_g1_i2	1	p3	(GGA)5	15	262	276
		TRINITY_DN18726_c0_g1_i6	1	p3	(GGA)5	15	262	276
		TRINITY_DN18726_c0_g1_i1	1	p3	(GGA)5	15	262	276
		TRINITY_DN22883_c1_g1_i1	1	p3	(ACC)5	15	211	225
		TRINITY_DN22802_c2_g1_i2	1	p2	(AG)6	12	69	80
		TRINITY_DN22802_c2_g1_i3	1	p2	(AG)8	16	11	26
		TRINITY_DN22802_c4_g1_i3	1	p2	(TC)6	12	228	239
		TRINITY_DN22802_c4_g1_i1	1	p2	(TC)6	12	228	239
		TRINITY_DN22801_c0_g5_i1	1	p3	(CGA)5	15	59	73
		TRINITY_DN22843_c0_g1_i6	1	p1	(A)10	10	239	248
		TRINITY_DN22843_c0_g1_i3	1	p1	(A)10	10	239	248
		TRINITY_DN22818_c0_g1_i6	1	p3	(GAC)5	15	579	593
		TRINITY_DN22818_c0_g1_i2	1	p3	(GAG)5	15	420	434
		TRINITY_DN22818_c0_g1_i5	1	p3	(GAG)5	15	670	684
		TRINITY_DN22818_c0_g1_i1	1	p3	(GAC)5	15	440	454
		TRINITY_DN22832_c0_g1_i6	1	p3	(CGC)6	18	50	67
		TRINITY_DN22895_c0_g1_i1	1	p2	(TC)7	14	251	264
		TRINITY_DN22850_c0_g3_i1	1	p1	(A)10	10	275	284
		TRINITY_DN22804_c0_g1_i1	1	p3	(CGG)5	15	359	373
		TRINITY_DN22804_c0_g1_i1	2	p3	(AGC)7	21	514	534
		TRINITY_DN22804_c0_g1_i2	1	p3	(AGC)5	15	511	525
		TRINITY_DN22804_c0_g1_i4	1	p3	(AGC)7	21	514	534
		TRINITY_DN22804_c0_g1_i5	1	p3	(AGC)7	21	517	537
		TRINITY_DN22876_c0_g1_i1	1	p1	(T)11	11	776	786
		TRINITY_DN22873_c1_g1_i3	1	p1	(T)10	10	2371	2380
		TRINITY_DN22864_c0_g1_i4	1	p2	(CT)7	14	475	488
		TRINITY_DN22864_c0_g1_i2	1	p2	(CT)6	12	253	264
		TRINITY_DN22864_c0_g1_i7	1	p2	(CT)7	14	1318	1331
		TRINITY_DN22820_c0_g1_i4	1	p3	(CCT)7	21	63	83
		TRINITY_DN22820_c0_g1_i1	1	p3	(CCT)7	21	63	83
		TRINITY_DN22829_c0_g3_i2	1	p3	(GGC)5	15	209	223
		TRINITY_DN22829_c0_g3_i1	1	p3	(GGC)5	15	212	226
		TRINITY_DN22807_c1_g1_i3	1	p2	(CT)14	28	23	50
		TRINITY_DN22807_c1_g1_i8	1	p4	(TATC)6	24	48	71
		TRINITY_DN22825_c0_g1_i2	1	p2	(GC)7	14	283	296
		TRINITY_DN22819_c1_g1_i2	1	p1	(T)10	10	104	113
		TRINITY_DN22867_c0_g1_i2	1	p1	(A)10	10	2709	2718
		TRINITY_DN22845_c1_g1_i6	1	p1	(T)10	10	2698	2707
		TRINITY_DN22845_c1_g1_i5	1	p1	(T)10	10	2881	2890
		TRINITY_DN22845_c1_g1_i8	1	p1	(T)10	10	2881	2890
		TRINITY_DN22835_c0_g1_i7	1	p1	(T)11	11	1680	1690
		TRINITY_DN22835_c0_g1_i4	1	p1	(T)11	11	1680	1690
		TRINITY_DN22835_c0_g1_i1	1	p1	(T)11	11	1680	1690
		TRINITY_DN22835_c0_g1_i8	1	p1	(T)11	11	1680	1690
		TRINITY_DN22835_c0_g1_i5	1	p1	(T)11	11	1680	1690
		TRINITY_DN22835_c0_g1_i3	1	p1	(T)11	11	1680	1690
		TRINITY_DN22835_c0_g1_i2	1	p1	(T)11	11	1680	1690
		TRINITY_DN22838_c1_g1_i1	1	p3	(TCC)5	15	42	56
		TRINITY_DN22854_c0_g2_i1	1	p3	(GAT)8	24	1105	1128
		TRINITY_DN60428_c0_g1_i7	1	p3	(TCT)5	15	287	301
		TRINITY_DN60489_c0_g1_i1	1	p3	(GCC)5	15	267	281
		TRINITY_DN60484_c0_g1_i7	1	p1	(A)10	10	1305	1314
		TRINITY_DN60456_c1_g1_i1	1	p2	(TG)8	16	539	554
		TRINITY_DN60456_c1_g1_i6	1	p2	(TG)9	18	340	357
		TRINITY_DN60456_c1_g1_i3	1	p2	(CT)8	16	31	46
		TRINITY_DN60423_c0_g1_i5	1	p3	(AGG)6	18	24	41
		TRINITY_DN60494_c0_g1_i1	1	p1	(A)10	10	22	31
		TRINITY_DN60476_c0_g1_i2	1	p3	(TCC)6	18	109	126
		TRINITY_DN60442_c0_g1_i3	1	p2	(TG)6	12	89	100
		TRINITY_DN60442_c0_g1_i2	1	p2	(TG)6	12	89	100
		TRINITY_DN60410_c0_g1_i6	1	p1	(T)10	10	537	546
		TRINITY_DN84376_c0_g1_i2	1	p1	(T)10	10	427	436
		TRINITY_DN84379_c2_g1_i1	1	p3	(GCG)5	15	32	46
		TRINITY_DN84315_c0_g1_i2	1	p3	(TCG)5	15	114	128
		TRINITY_DN84315_c0_g1_i1	1	p3	(TCG)5	15	114	128
		TRINITY_DN84349_c2_g1_i1	1	p3	(GTC)6	18	221	238
		TRINITY_DN84333_c0_g1_i16	1	p1	(T)11	11	1216	1226
		TRINITY_DN3023_c0_g2_i2	1	p3	(TCT)5	15	333	347
		TRINITY_DN3051_c0_g1_i3	1	p2	(TG)6	12	994	1005
		TRINITY_DN3051_c0_g1_i9	1	p2	(TG)6	12	979	990
		TRINITY_DN3030_c0_g1_i4	1	p4	(CTGT)6	24	2010	2033
		TRINITY_DN3030_c0_g1_i1	1	p4	(CTGT)6	24	2004	2027
		TRINITY_DN3054_c0_g1_i1	1	p3	(CTC)8	24	247	270
		TRINITY_DN3054_c0_g1_i2	1	p3	(CTC)6	18	244	261
		TRINITY_DN3054_c0_g1_i3	1	p3	(CTC)5	15	244	258
		TRINITY_DN3025_c0_g1_i4	1	p3	(ACG)5	15	291	305
		TRINITY_DN3025_c0_g1_i7	1	p3	(ACG)5	15	291	305
		TRINITY_DN3025_c0_g1_i1	1	p3	(ACG)5	15	291	305
		TRINITY_DN3025_c0_g1_i6	1	p3	(CCG)8	24	63	86
		TRINITY_DN3025_c0_g1_i6	2	p3	(ACG)5	15	291	305
		TRINITY_DN3025_c0_g1_i5	1	p3	(ACG)5	15	291	305
		TRINITY_DN3025_c0_g1_i8	1	p3	(ACG)5	15	291	305
		TRINITY_DN3025_c0_g1_i2	1	p3	(ACG)5	15	291	305
		TRINITY_DN3025_c0_g1_i3	1	p3	(CCG)8	24	63	86
		TRINITY_DN3025_c0_g1_i3	2	p3	(ACG)5	15	291	305
		TRINITY_DN3099_c3_g1_i1	1	p3	(GGC)6	18	15	32
		TRINITY_DN3016_c0_g1_i12	1	p1	(T)10	10	2534	2543
		TRINITY_DN3016_c0_g1_i11	1	p2	(GA)6	12	380	391
		TRINITY_DN3016_c0_g1_i2	1	p2	(GA)6	12	380	391
		TRINITY_DN3017_c0_g1_i6	1	p2	(CG)6	12	113	124
		TRINITY_DN3017_c0_g1_i4	1	p2	(CG)6	12	113	124
		TRINITY_DN3017_c0_g1_i2	1	p2	(CG)6	12	113	124
		TRINITY_DN3077_c0_g1_i4	1	p3	(TCC)5	15	33	47
		TRINITY_DN3077_c0_g1_i3	1	p3	(TCC)5	15	33	47
		TRINITY_DN3077_c0_g1_i5	1	p3	(TCC)5	15	33	47
		TRINITY_DN3077_c0_g1_i1	1	p3	(TCC)5	15	33	47
		TRINITY_DN3077_c0_g1_i2	1	p3	(TCC)5	15	33	47
		TRINITY_DN3077_c0_g2_i1	1	p3	(CGC)5	15	28	42
		TRINITY_DN3046_c0_g1_i7	1	p3	(CGC)5	15	133	147
		TRINITY_DN3046_c0_g1_i2	1	c	(CCG)6cgccgcccgtctcgcccgccggcttgtcctccctccacctccccagcgaagcgccggt(CGC)5	91	65	155
		TRINITY_DN3046_c0_g1_i4	1	p3	(CGC)5	15	168	182
		TRINITY_DN3046_c0_g1_i10	1	p3	(CGC)5	15	168	182
		TRINITY_DN3046_c0_g1_i1	1	p3	(CGC)5	15	133	147
		TRINITY_DN3046_c0_g1_i9	1	p3	(CGC)5	15	168	182
		TRINITY_DN3046_c0_g1_i6	1	p3	(CGC)5	15	168	182
		TRINITY_DN3046_c0_g1_i5	1	p3	(CGC)5	15	133	147
		TRINITY_DN3046_c0_g1_i8	1	p3	(CGC)5	15	168	182
		TRINITY_DN3046_c0_g1_i3	1	p3	(CGC)5	15	133	147
		TRINITY_DN3009_c0_g1_i2	1	p3	(TTG)8	24	1818	1841
		TRINITY_DN3009_c0_g1_i7	1	p3	(TTG)8	24	2214	2237
		TRINITY_DN3009_c0_g1_i10	1	p3	(TTG)8	24	2214	2237
		TRINITY_DN3009_c0_g1_i4	1	p3	(TTG)8	24	2068	2091
		TRINITY_DN3009_c0_g1_i1	1	p3	(TTG)8	24	1818	1841
		TRINITY_DN3009_c0_g1_i5	1	p3	(TTG)8	24	1964	1987
		TRINITY_DN3009_c0_g1_i3	1	p3	(TTG)8	24	1964	1987
		TRINITY_DN3009_c0_g1_i6	1	p3	(TTG)8	24	1964	1987
		TRINITY_DN3005_c1_g1_i8	1	p3	(GAA)5	15	79	93
		TRINITY_DN3005_c1_g1_i1	1	p3	(GAA)5	15	79	93
		TRINITY_DN3005_c1_g1_i6	1	p2	(TG)6	12	530	541
		TRINITY_DN3047_c0_g1_i9	1	p3	(CCG)5	15	71	85
		TRINITY_DN3052_c0_g1_i15	1	c	(GCA)5gatgatgcagcaggctctgctcatgcaccagcac(CAG)5	64	365	428
		TRINITY_DN3052_c0_g1_i10	1	p3	(GCA)5	15	365	379
		TRINITY_DN3052_c0_g1_i11	1	p3	(GCA)5	15	365	379
		TRINITY_DN3052_c0_g1_i8	1	c	(GCA)5gatgatgcagcaggcgctgctcatgcaccac(CAG)6	64	391	454
		TRINITY_DN3052_c0_g1_i3	1	p1	(T)10	10	192	201
		TRINITY_DN3052_c0_g1_i3	2	c	(GCA)5gatgatgcagcaggctctgctcatgcaccagcac(CAG)5	64	396	459
		TRINITY_DN3052_c0_g1_i2	1	p1	(T)10	10	192	201
		TRINITY_DN3052_c0_g1_i2	2	c	(GCA)5gatgatgcagcaggctctgctcatgcaccagcac(CAG)5	64	396	459
		TRINITY_DN3052_c1_g1_i1	1	p3	(CAG)5	15	46	60
		TRINITY_DN3097_c2_g1_i1	1	p3	(CCT)6	18	242	259
		TRINITY_DN3022_c0_g1_i7	1	p3	(AGC)5	15	7835	7849
		TRINITY_DN3022_c0_g1_i6	1	p3	(AGC)5	15	7835	7849
		TRINITY_DN3076_c0_g1_i5	1	p3	(TTG)5	15	1245	1259
		TRINITY_DN3076_c0_g1_i6	1	p3	(TTG)5	15	1217	1231
		TRINITY_DN3076_c0_g1_i7	1	p3	(TTG)5	15	1141	1155
		TRINITY_DN3076_c0_g1_i1	1	p3	(GCA)6	18	77	94
		TRINITY_DN3076_c0_g1_i8	1	p3	(TTG)5	15	1141	1155
		TRINITY_DN3076_c0_g4_i2	1	p3	(GCA)6	18	77	94
		TRINITY_DN3076_c0_g4_i1	1	p3	(GCA)6	18	77	94
		TRINITY_DN3015_c0_g1_i5	1	p1	(A)13	13	100	112
		TRINITY_DN3027_c0_g1_i9	1	p2	(CT)6	12	1712	1723
		TRINITY_DN3027_c0_g1_i5	1	p2	(CT)6	12	1449	1460
		TRINITY_DN3027_c0_g1_i6	1	p2	(CT)6	12	1720	1731
		TRINITY_DN3027_c0_g1_i7	1	p3	(CCG)6	18	239	256
		TRINITY_DN3027_c0_g1_i7	2	p2	(CT)6	12	1721	1732
		TRINITY_DN3091_c0_g1_i3	1	p1	(T)11	11	1832	1842
		TRINITY_DN3091_c0_g1_i1	1	p1	(T)11	11	1831	1841
		TRINITY_DN3068_c0_g1_i12	1	p2	(TC)7	14	170	183
		TRINITY_DN3068_c0_g1_i6	1	p2	(TC)7	14	170	183
		TRINITY_DN3068_c0_g1_i5	1	p2	(TC)7	14	170	183
		TRINITY_DN3068_c0_g1_i11	1	p2	(TC)7	14	170	183
		TRINITY_DN3068_c3_g1_i1	1	p3	(TGC)6	18	342	359
		TRINITY_DN3012_c0_g1_i15	1	p2	(GT)6	12	1876	1887
		TRINITY_DN3012_c0_g1_i13	1	p2	(GT)6	12	1899	1910
		TRINITY_DN3012_c0_g1_i2	1	p2	(GT)6	12	1876	1887
		TRINITY_DN3012_c0_g1_i3	1	p2	(GT)6	12	906	917
		TRINITY_DN3012_c0_g1_i10	1	p2	(GT)6	12	816	827
		TRINITY_DN3012_c0_g1_i1	1	p2	(GT)6	12	906	917
		TRINITY_DN3012_c0_g1_i16	1	p2	(GT)6	12	1899	1910
		TRINITY_DN3012_c0_g1_i14	1	p2	(GT)6	12	1876	1887
		TRINITY_DN3012_c0_g1_i7	1	p2	(GT)6	12	1899	1910
		TRINITY_DN3048_c0_g1_i2	1	p3	(CCT)5	15	21	35
		TRINITY_DN3029_c0_g1_i2	1	p3	(CCT)6	18	44	61
		TRINITY_DN3029_c0_g1_i4	1	p3	(CCT)6	18	44	61
		TRINITY_DN3080_c0_g1_i1	1	p3	(CCG)5	15	664	678
		TRINITY_DN3080_c0_g1_i2	1	p3	(CCG)5	15	650	664
		TRINITY_DN3080_c1_g2_i4	1	p3	(CCG)7	21	43	63
		TRINITY_DN3080_c1_g2_i4	2	p3	(GAT)6	18	1230	1247
		TRINITY_DN3080_c1_g2_i4	3	c	(AG)10cttaggtctagggtttgtttttgtaatcctttattaataggaagggcgtccttgtattgattcattcccaacaagaat(A)10	108	3233	3340
		TRINITY_DN3080_c1_g2_i3	1	p3	(CCG)7	21	43	63
		TRINITY_DN3080_c1_g2_i8	1	p3	(GAT)6	18	1230	1247
		TRINITY_DN3080_c1_g2_i8	2	p1	(A)10	10	3316	3325
		TRINITY_DN3080_c1_g2_i7	1	p3	(CCG)7	21	43	63
		TRINITY_DN3080_c1_g2_i1	1	p3	(GAT)6	18	128	145
		TRINITY_DN3080_c1_g2_i1	2	c	(AG)10cttaggtctagggtttgtttttgtaatcctttattaataggaagggcgtccttgtattgattcattcccaacaagaat(A)10	108	2131	2238
		TRINITY_DN3080_c1_g2_i5	1	p3	(CCG)7	21	43	63
		TRINITY_DN3080_c1_g2_i2	1	p3	(GAT)6	18	128	145
		TRINITY_DN3080_c1_g2_i6	1	p3	(GAT)6	18	128	145
		TRINITY_DN3080_c1_g2_i6	2	p1	(A)10	10	2214	2223
		TRINITY_DN3080_c3_g1_i1	1	p3	(GAT)5	15	221	235
		TRINITY_DN3080_c3_g1_i2	1	p3	(GAT)5	15	222	236
		TRINITY_DN3034_c0_g1_i1	1	p3	(CTC)5	15	147	161
		TRINITY_DN3065_c1_g1_i1	1	p3	(GCT)6	18	78	95
		TRINITY_DN3065_c1_g1_i4	1	p3	(GCT)6	18	146	163
		TRINITY_DN3000_c0_g1_i2	1	p1	(A)10	10	3434	3443
		TRINITY_DN3000_c0_g1_i7	1	p1	(A)10	10	2481	2490
		TRINITY_DN3000_c0_g1_i3	1	p1	(A)10	10	3434	3443
		TRINITY_DN3024_c0_g1_i3	1	p3	(CGG)8	24	44	67
		TRINITY_DN3024_c0_g1_i2	1	p3	(CGG)8	24	44	67
		TRINITY_DN3024_c0_g1_i4	1	p3	(CGG)8	24	44	67
		TRINITY_DN3024_c0_g1_i6	1	p3	(CGG)8	24	44	67
		TRINITY_DN3024_c0_g1_i1	1	p3	(CGG)8	24	44	67
		TRINITY_DN3024_c0_g1_i5	1	p3	(CGG)8	24	44	67
		TRINITY_DN3093_c0_g2_i1	1	p3	(GCC)5	15	566	580
		TRINITY_DN3002_c0_g1_i17	1	c	(CT)9ttctc(TG)11	45	2429	2473
		TRINITY_DN3002_c0_g1_i11	1	c	(CT)9ttctc(TG)11	45	2411	2455
		TRINITY_DN3002_c0_g1_i18	1	c	(CT)9ttctc(TG)11	45	2199	2243
		TRINITY_DN3002_c0_g1_i4	1	p3	(GTC)5	15	448	462
		TRINITY_DN3002_c0_g1_i6	1	c	(CT)9ttctc(TG)11	45	2530	2574
		TRINITY_DN3002_c0_g1_i15	1	c	(CT)9ttctc(TG)11	45	2548	2592
		TRINITY_DN3081_c0_g1_i1	1	p3	(CGG)5	15	625	639
		TRINITY_DN3081_c1_g1_i2	1	p2	(GC)6	12	411	422
		TRINITY_DN58607_c0_g1_i2	1	p1	(A)10	10	22	31
		TRINITY_DN58607_c0_g1_i1	1	p1	(A)10	10	22	31
		TRINITY_DN58665_c0_g1_i5	1	p1	(A)10	10	145	154
		TRINITY_DN58665_c0_g1_i6	1	p1	(A)10	10	145	154
		TRINITY_DN58675_c0_g1_i1	1	p1	(T)10	10	271	280
		TRINITY_DN58675_c0_g1_i2	1	p1	(T)10	10	271	280
		TRINITY_DN58675_c0_g1_i3	1	p1	(T)10	10	270	279
		TRINITY_DN58693_c0_g1_i2	1	p3	(TTG)8	24	32	55
		TRINITY_DN58616_c0_g1_i1	1	p1	(T)10	10	2319	2328
		TRINITY_DN58616_c0_g1_i2	1	p1	(T)10	10	2319	2328
		TRINITY_DN58642_c0_g2_i1	1	p1	(A)11	11	166	176
		TRINITY_DN58661_c1_g2_i1	1	p1	(A)11	11	975	985
		TRINITY_DN58661_c1_g2_i1	2	p1	(A)10	10	1094	1103
		TRINITY_DN16118_c0_g1_i3	1	p3	(GCA)6	18	4	21
		TRINITY_DN16118_c0_g3_i2	1	p3	(CAG)6	18	2	19
		TRINITY_DN16118_c0_g3_i1	1	p3	(CAG)6	18	2	19
		TRINITY_DN16145_c0_g1_i8	1	p2	(TG)6	12	3172	3183
		TRINITY_DN16145_c0_g1_i2	1	p2	(TG)6	12	3217	3228
		TRINITY_DN16145_c0_g1_i11	1	p2	(TG)6	12	2439	2450
		TRINITY_DN16184_c0_g1_i6	1	p1	(A)10	10	906	915
		TRINITY_DN16184_c0_g1_i1	1	p3	(GCA)5	15	271	285
		TRINITY_DN16101_c2_g1_i2	1	p3	(AGC)6	18	61	78
		TRINITY_DN16199_c0_g1_i1	1	p3	(CCG)5	15	117	131
		TRINITY_DN16139_c1_g1_i11	1	p2	(TG)7	14	215	228
		TRINITY_DN16139_c1_g1_i17	1	p2	(TG)7	14	105	118
		TRINITY_DN16151_c0_g1_i3	1	p2	(GA)7	14	26	39
		TRINITY_DN16155_c0_g1_i7	1	p6	(GACTAT)7	42	1029	1070
		TRINITY_DN16155_c0_g1_i8	1	p6	(GACTAT)7	42	317	358
		TRINITY_DN16155_c0_g1_i6	1	p6	(GACTAT)7	42	1013	1054
		TRINITY_DN16155_c0_g1_i15	1	p6	(GACTAT)7	42	1487	1528
		TRINITY_DN16155_c0_g1_i11	1	p6	(GACTAT)7	42	2549	2590
		TRINITY_DN16155_c0_g1_i1	1	p6	(GACTAT)7	42	1487	1528
		TRINITY_DN16153_c0_g1_i6	1	p1	(A)10	10	2344	2353
		TRINITY_DN16153_c0_g1_i2	1	p3	(GCC)5	15	176	190
		TRINITY_DN16179_c0_g1_i1	1	p3	(TAG)6	18	326	343
		TRINITY_DN16149_c0_g1_i1	1	p3	(CCG)5	15	86	100
		TRINITY_DN16125_c0_g1_i9	1	p2	(AT)6	12	2488	2499
		TRINITY_DN16125_c0_g1_i13	1	p2	(AT)6	12	2448	2459
		TRINITY_DN16117_c0_g1_i1	1	p1	(T)10	10	1063	1072
		TRINITY_DN16117_c0_g1_i12	1	p1	(T)10	10	1130	1139
		TRINITY_DN16117_c0_g1_i9	1	p1	(T)10	10	983	992
		TRINITY_DN16180_c0_g1_i5	1	p3	(GGT)6	18	217	234
		TRINITY_DN16180_c0_g1_i6	1	p3	(GGT)6	18	217	234
		TRINITY_DN16180_c0_g1_i4	1	p3	(GGT)6	18	217	234
		TRINITY_DN16160_c0_g1_i5	1	p3	(CGA)7	21	73	93
		TRINITY_DN16160_c0_g1_i5	2	p3	(CGA)7	21	244	264
		TRINITY_DN16160_c0_g1_i4	1	p3	(CGA)7	21	73	93
		TRINITY_DN16160_c0_g1_i4	2	p3	(CGA)7	21	244	264
		TRINITY_DN16160_c0_g1_i2	1	p3	(CGA)7	21	244	264
		TRINITY_DN16134_c0_g2_i1	1	p3	(TGA)5	15	232	246
		TRINITY_DN16134_c0_g2_i2	1	p3	(TGA)5	15	196	210
		TRINITY_DN16181_c0_g1_i4	1	p3	(CCG)5	15	123	137
		TRINITY_DN16181_c0_g1_i5	1	c	(CCG)5cccgggccgctagggtttcgggcagccgcgagnnnnnnnnnnnnnnnnnnnnnnnnnnnnnnnnnnnnnnnnnnnccaacggcggcgcggcctgcta(CGG)5	127	123	249
		TRINITY_DN16181_c0_g1_i3	1	p3	(CGG)5	15	235	249
		TRINITY_DN16181_c0_g1_i2	1	p3	(CCG)5	15	123	137
		TRINITY_DN16181_c0_g1_i1	1	c	(CCG)5cccgggccgctagggtttcgggcagccgcgaggccagnnnnnnnnnnnnnnnnnnnnnnnncgactggggcctccccaacggcggcgcggcctgcta(CGG)5	127	123	249
		TRINITY_DN16111_c0_g1_i11	1	p3	(ATT)5	15	83	97
		TRINITY_DN16111_c0_g1_i6	1	p3	(ATT)5	15	83	97
		TRINITY_DN16111_c0_g1_i10	1	p3	(ATT)5	15	83	97
		TRINITY_DN16111_c0_g1_i5	1	p3	(ATT)5	15	83	97
		TRINITY_DN16111_c0_g1_i9	1	p3	(ATT)5	15	83	97
		TRINITY_DN16111_c0_g1_i3	1	p3	(ATT)5	15	83	97
		TRINITY_DN16111_c0_g2_i1	1	p1	(A)10	10	2442	2451
		TRINITY_DN16111_c0_g5_i1	1	p2	(AT)6	12	42	53
		TRINITY_DN16111_c0_g6_i1	1	c	(CTT)5(ATT)6	33	387	419
		TRINITY_DN16140_c0_g1_i5	1	p3	(GCC)5	15	42	56
		TRINITY_DN16140_c0_g1_i1	1	p3	(GCC)5	15	42	56
		TRINITY_DN16140_c0_g1_i13	1	p3	(GCC)5	15	42	56
		TRINITY_DN16140_c0_g1_i9	1	p3	(GCC)5	15	42	56
		TRINITY_DN16140_c0_g1_i10	1	p3	(GCC)5	15	42	56
		TRINITY_DN16146_c0_g1_i4	1	p3	(GCG)5	15	13	27
		TRINITY_DN16165_c0_g1_i5	1	p2	(TC)6	12	1833	1844
		TRINITY_DN16165_c0_g1_i8	1	p2	(TC)6	12	1522	1533
		TRINITY_DN16165_c0_g1_i2	1	p2	(TC)6	12	1922	1933
		TRINITY_DN16167_c0_g1_i1	1	p3	(CTC)5	15	275	289
		TRINITY_DN16167_c0_g1_i6	1	p3	(CTC)5	15	284	298
		TRINITY_DN16167_c0_g1_i2	1	p3	(CTC)5	15	167	181
		TRINITY_DN16167_c0_g2_i1	1	p1	(C)13	13	220	232
		TRINITY_DN16108_c0_g3_i1	1	p1	(T)10	10	613	622
		TRINITY_DN16192_c0_g1_i4	1	p4	(GAAA)6	24	387	410
		TRINITY_DN16192_c0_g1_i5	1	p4	(AGAA)9	36	159	194
		TRINITY_DN16189_c0_g1_i1	1	p3	(CAC)5	15	235	249
		TRINITY_DN16189_c0_g1_i4	1	p4	(CAAT)5	20	223	242
		TRINITY_DN16189_c0_g2_i2	1	p3	(GTG)5	15	305	319
		TRINITY_DN16189_c0_g2_i2	2	p1	(A)15	15	527	541
		TRINITY_DN16183_c0_g1_i3	1	p1	(A)10	10	42	51
		TRINITY_DN16130_c0_g3_i2	1	p2	(AC)6	12	105	116
		TRINITY_DN16130_c0_g3_i2	2	p4	(TTCT)5	20	1041	1060
		TRINITY_DN16130_c0_g3_i4	1	p4	(TTCT)5	20	957	976
		TRINITY_DN16141_c0_g1_i2	1	p2	(AG)6	12	1556	1567
		TRINITY_DN16169_c0_g2_i7	1	p1	(T)10	10	1702	1711
		TRINITY_DN16169_c0_g2_i7	2	p1	(G)10	10	2435	2444
		TRINITY_DN16169_c0_g2_i6	1	p1	(T)10	10	1702	1711
		TRINITY_DN16115_c0_g1_i11	1	p2	(TC)17	34	190	223
		TRINITY_DN16115_c0_g1_i7	1	p2	(TC)17	34	190	223
		TRINITY_DN16115_c0_g1_i14	1	p2	(TC)17	34	190	223
		TRINITY_DN16115_c0_g1_i17	1	p2	(TC)17	34	190	223
		TRINITY_DN16115_c0_g1_i16	1	p2	(TC)17	34	190	223
		TRINITY_DN16115_c0_g1_i13	1	p2	(TC)17	34	190	223
		TRINITY_DN16128_c0_g1_i8	1	p3	(GGA)5	15	231	245
		TRINITY_DN16128_c0_g1_i3	1	c	(GGA)6cgcgtacgaggacgagat(GGA)6	54	207	260
		TRINITY_DN16128_c0_g1_i12	1	p3	(GGA)5	15	231	245
		TRINITY_DN16128_c0_g1_i16	1	p3	(GGA)5	15	231	245
		TRINITY_DN16128_c0_g1_i5	1	c	(GGA)6cgcgtacgaggacgagat(GGA)6	54	207	260
		TRINITY_DN16128_c0_g1_i6	1	p3	(GGA)5	15	231	245
		TRINITY_DN16128_c0_g1_i1	1	p3	(GGA)5	15	231	245
		TRINITY_DN16128_c0_g1_i7	1	p3	(GGA)5	15	231	245
		TRINITY_DN16128_c0_g1_i2	1	p3	(GGA)5	15	231	245
		TRINITY_DN16126_c0_g1_i8	1	p3	(GCC)6	18	180	197
		TRINITY_DN16106_c1_g1_i2	1	p1	(A)12	12	1677	1688
		TRINITY_DN16106_c1_g1_i6	1	p1	(A)12	12	1677	1688
		TRINITY_DN16106_c1_g1_i1	1	p1	(A)12	12	1425	1436
		TRINITY_DN16161_c0_g1_i6	1	p3	(GCA)7	21	364	384
		TRINITY_DN16161_c0_g1_i2	1	p3	(GCA)7	21	410	430
		TRINITY_DN16161_c0_g1_i3	1	p3	(GCA)7	21	410	430
		TRINITY_DN16197_c0_g1_i18	1	p1	(T)10	10	1380	1389
		TRINITY_DN16197_c0_g1_i8	1	p1	(T)10	10	1015	1024
		TRINITY_DN16197_c0_g1_i17	1	p1	(T)10	10	1348	1357
		TRINITY_DN94883_c0_g1_i1	1	p3	(CCT)5	15	66	80
		TRINITY_DN94808_c0_g1_i1	1	p1	(A)11	11	260	270
		TRINITY_DN94871_c0_g4_i1	1	p4	(TTTG)6	24	653	676
		TRINITY_DN94871_c0_g4_i2	1	p4	(TTTG)6	24	259	282
		TRINITY_DN94871_c0_g5_i1	1	p3	(AGG)5	15	205	219
		TRINITY_DN94888_c0_g1_i1	1	p2	(TG)9	18	37	54
		TRINITY_DN93899_c2_g2_i4	1	p3	(AAC)5	15	241	255
		TRINITY_DN93831_c0_g1_i3	1	p3	(GCG)5	15	1908	1922
		TRINITY_DN93892_c1_g2_i1	1	p2	(GT)17	34	449	482
		TRINITY_DN93832_c0_g2_i1	1	p1	(A)11	11	798	808
		TRINITY_DN93868_c0_g1_i2	1	p2	(TG)7	14	505	518
		TRINITY_DN93817_c0_g1_i1	1	p3	(GAG)5	15	181	195
		TRINITY_DN93828_c0_g5_i1	1	p2	(CT)6	12	18	29
		TRINITY_DN82903_c0_g1_i1	1	p2	(TG)8	16	419	434
		TRINITY_DN82938_c0_g1_i1	1	p2	(AT)6	12	616	627
		TRINITY_DN82914_c0_g2_i1	1	p2	(TC)6	12	690	701
		TRINITY_DN82970_c0_g1_i4	1	p1	(A)12	12	1758	1769
		TRINITY_DN82970_c0_g1_i5	1	p1	(A)12	12	905	916
		TRINITY_DN82970_c0_g1_i2	1	p1	(A)12	12	1745	1756
		TRINITY_DN82970_c0_g1_i1	1	p1	(A)12	12	1749	1760
		TRINITY_DN82957_c1_g1_i1	1	p3	(GCA)5	15	50	64
		TRINITY_DN49666_c0_g1_i1	1	p2	(TC)18	36	845	880
		TRINITY_DN49653_c0_g1_i7	1	p3	(TCT)5	15	491	505
		TRINITY_DN49690_c1_g1_i1	1	p3	(GGA)5	15	387	401
		TRINITY_DN49681_c0_g2_i1	1	p4	(TCTT)5	20	516	535
		TRINITY_DN49670_c0_g1_i1	1	p2	(AG)21	42	12	53
		TRINITY_DN49673_c0_g1_i2	1	p2	(GT)6	12	230	241
		TRINITY_DN49640_c0_g1_i6	1	p1	(T)10	10	3790	3799
		TRINITY_DN49640_c0_g1_i14	1	p1	(T)10	10	3817	3826
		TRINITY_DN49640_c0_g1_i5	1	p1	(T)10	10	3986	3995
		TRINITY_DN49640_c0_g1_i11	1	p1	(T)10	10	3858	3867
		TRINITY_DN49608_c0_g1_i1	1	p1	(T)12	12	564	575
		TRINITY_DN49677_c0_g1_i1	1	p1	(T)11	11	196	206
		TRINITY_DN49693_c0_g1_i1	1	p3	(CCT)6	18	55	72
		TRINITY_DN49699_c0_g1_i2	1	p1	(T)11	11	451	461
		TRINITY_DN49644_c0_g2_i1	1	p1	(T)10	10	209	218
		TRINITY_DN49645_c0_g1_i2	1	p2	(CA)10	20	118	137
		TRINITY_DN49605_c0_g1_i9	1	p1	(A)10	10	951	960
		TRINITY_DN74433_c0_g1_i3	1	p3	(CGC)6	18	29	46
		TRINITY_DN74433_c0_g1_i1	1	p3	(CGC)6	18	29	46
		TRINITY_DN74473_c1_g1_i2	1	p4	(GATG)6	24	213	236
		TRINITY_DN74407_c0_g1_i1	1	p2	(AT)6	12	721	732
		TRINITY_DN74458_c0_g2_i1	1	p1	(T)10	10	421	430
		TRINITY_DN74442_c0_g4_i1	1	p1	(A)10	10	157	166
		TRINITY_DN74461_c1_g1_i1	1	p1	(T)10	10	149	158
		TRINITY_DN74418_c0_g1_i1	1	p3	(GGC)6	18	192	209
		TRINITY_DN74418_c0_g1_i6	1	p3	(GGC)6	18	192	209
		TRINITY_DN74418_c0_g2_i1	1	p3	(CCT)5	15	213	227
		TRINITY_DN77460_c0_g1_i2	1	p2	(CA)6	12	378	389
		TRINITY_DN77499_c0_g1_i2	1	p1	(T)11	11	120	130
		TRINITY_DN77412_c0_g1_i1	1	p2	(CT)7	14	332	345
		TRINITY_DN77412_c0_g1_i4	1	p2	(CT)7	14	332	345
		TRINITY_DN77412_c0_g1_i4	2	p1	(T)10	10	1056	1065
		TRINITY_DN77412_c0_g1_i2	1	p2	(CT)7	14	271	284
		TRINITY_DN77412_c0_g1_i2	2	p1	(T)10	10	995	1004
		TRINITY_DN77412_c0_g1_i3	1	p2	(CT)7	14	271	284
		TRINITY_DN77427_c0_g2_i1	1	p1	(A)10	10	320	329
		TRINITY_DN77452_c0_g1_i1	1	p1	(A)11	11	245	255
		TRINITY_DN77452_c0_g1_i2	1	p1	(A)11	11	245	255
		TRINITY_DN77452_c0_g1_i4	1	p1	(A)10	10	248	257
		TRINITY_DN87824_c0_g1_i1	1	p3	(CGC)5	15	108	122
		TRINITY_DN87856_c0_g1_i1	1	p3	(TCA)5	15	91	105
		TRINITY_DN87848_c0_g1_i1	1	p3	(CTT)5	15	54	68
		TRINITY_DN87840_c0_g1_i2	1	p1	(A)10	10	400	409
		TRINITY_DN87851_c1_g1_i1	1	p3	(TTG)9	27	380	406
		TRINITY_DN87865_c0_g1_i1	1	p1	(T)10	10	145	154
		TRINITY_DN58071_c0_g1_i2	1	p3	(GAC)7	21	482	502
		TRINITY_DN58071_c0_g1_i4	1	p3	(GAC)7	21	482	502
		TRINITY_DN58055_c0_g2_i2	1	p3	(CGG)5	15	178	192
		TRINITY_DN58089_c0_g1_i3	1	p1	(T)10	10	663	672
		TRINITY_DN58010_c2_g1_i1	1	p3	(CCT)6	18	17	34
		TRINITY_DN58027_c0_g1_i1	1	p3	(CGA)5	15	128	142
		TRINITY_DN58026_c1_g1_i5	1	p2	(GA)6	12	153	164
		TRINITY_DN58026_c1_g1_i4	1	p2	(GA)6	12	321	332
		TRINITY_DN58072_c0_g1_i7	1	p3	(TCG)5	15	397	411
		TRINITY_DN58072_c0_g1_i5	1	p3	(TCG)5	15	287	301
		TRINITY_DN58072_c1_g1_i4	1	p3	(CGA)5	15	192	206
		TRINITY_DN58072_c1_g1_i2	1	p3	(CGA)5	15	192	206
		TRINITY_DN58064_c0_g2_i1	1	p3	(ATG)5	15	113	127
		TRINITY_DN58031_c0_g1_i1	1	p1	(A)10	10	152	161
		TRINITY_DN58054_c0_g1_i2	1	p3	(TGA)5	15	1624	1638
		TRINITY_DN58068_c0_g1_i4	1	p5	(CCTCT)5	25	161	185
		TRINITY_DN58047_c0_g1_i5	1	p2	(AT)6	12	1117	1128
		TRINITY_DN58047_c0_g1_i1	1	p2	(AT)6	12	1662	1673
		TRINITY_DN58047_c0_g1_i3	1	p2	(AT)6	12	1200	1211
		TRINITY_DN58047_c0_g1_i4	1	p2	(AT)6	12	1267	1278
		TRINITY_DN58079_c0_g1_i1	1	p3	(CCT)5	15	548	562
		TRINITY_DN58019_c0_g1_i2	1	p3	(GCG)5	15	75	89
		TRINITY_DN58019_c1_g1_i4	1	p3	(AGC)7	21	34	54
		TRINITY_DN58019_c1_g1_i7	1	c	(AGA)5aaa(AGC)7	39	16	54
		TRINITY_DN2426_c0_g1_i1	1	p2	(GA)9	18	775	792
		TRINITY_DN2426_c0_g1_i4	1	p2	(GA)6	12	154	165
		TRINITY_DN2426_c0_g2_i2	1	p2	(CA)6	12	553	564
		TRINITY_DN2426_c0_g2_i1	1	p2	(TC)6	12	542	553
		TRINITY_DN2404_c1_g2_i2	1	p1	(A)20	20	58	77
		TRINITY_DN2404_c1_g2_i7	1	p1	(A)18	18	60	77
		TRINITY_DN2468_c0_g1_i3	1	p3	(GCA)5	15	632	646
		TRINITY_DN2468_c0_g1_i11	1	p3	(GCA)5	15	632	646
		TRINITY_DN2468_c0_g1_i5	1	p3	(GCA)5	15	602	616
		TRINITY_DN2468_c0_g1_i9	1	p3	(GCA)5	15	632	646
		TRINITY_DN2468_c0_g1_i7	1	p3	(GCA)5	15	602	616
		TRINITY_DN2468_c0_g1_i10	1	p3	(GCA)5	15	605	619
		TRINITY_DN2468_c0_g1_i12	1	p3	(GCA)5	15	605	619
		TRINITY_DN2468_c0_g1_i1	1	p3	(GCA)5	15	632	646
		TRINITY_DN2468_c0_g1_i4	1	p3	(GCA)5	15	602	616
		TRINITY_DN2468_c0_g1_i6	1	p3	(GCA)5	15	605	619
		TRINITY_DN2481_c0_g1_i5	1	p6	(GAAAGA)5	30	1	30
		TRINITY_DN2481_c0_g1_i6	1	p6	(GAAAGA)5	30	1	30
		TRINITY_DN2418_c0_g1_i1	1	p3	(AGA)5	15	208	222
		TRINITY_DN2418_c0_g2_i2	1	p2	(CT)8	16	947	962
		TRINITY_DN2418_c0_g2_i6	1	p3	(TTC)5	15	632	646
		TRINITY_DN2418_c0_g2_i6	2	p2	(CT)8	16	914	929
		TRINITY_DN2418_c0_g2_i3	1	p3	(TTC)5	15	647	661
		TRINITY_DN2418_c0_g2_i3	2	p2	(CT)8	16	929	944
		TRINITY_DN2490_c0_g1_i10	1	p2	(CT)7	14	18	31
		TRINITY_DN2490_c0_g1_i3	1	p2	(CT)7	14	18	31
		TRINITY_DN2447_c0_g3_i1	1	p3	(GCC)6	18	112	129
		TRINITY_DN2447_c1_g1_i2	1	p1	(A)10	10	1561	1570
		TRINITY_DN2406_c0_g1_i1	1	p4	(AGAA)5	20	59	78
		TRINITY_DN2406_c1_g2_i1	1	p4	(GAAA)6	24	25	48
		TRINITY_DN2406_c2_g1_i2	1	p4	(AAAG)8	32	1638	1669
		TRINITY_DN2406_c2_g1_i1	1	p1	(A)10	10	1505	1514
		TRINITY_DN2406_c2_g1_i1	2	p4	(AAAG)8	32	3076	3107
		TRINITY_DN2402_c0_g1_i2	1	c	(CCT)6aggtaccactactatagataatttcttgctcatcttcttccagttcctctatcatataccgtatacggatacggagaactaaattgtaccctccaattc(A)10	127	846	972
		TRINITY_DN2402_c0_g1_i4	1	p1	(A)10	10	974	983
		TRINITY_DN2402_c0_g1_i1	1	p3	(CCT)6	18	846	863
		TRINITY_DN2402_c0_g1_i3	1	p1	(A)10	10	966	975
		TRINITY_DN2402_c0_g1_i5	1	p3	(CCT)6	18	857	874
		TRINITY_DN2402_c1_g1_i1	1	p2	(CG)6	12	227	238
		TRINITY_DN2434_c0_g1_i7	1	p3	(CTC)7	21	99	119
		TRINITY_DN2434_c0_g1_i6	1	p5	(CCTCT)5	25	46	70
		TRINITY_DN2434_c0_g1_i4	1	p5	(CCTCT)5	25	46	70
		TRINITY_DN2434_c0_g1_i9	1	p5	(CCTCT)5	25	46	70
		TRINITY_DN2434_c1_g1_i1	1	p4	(AAAG)5	20	13	32
		TRINITY_DN2434_c1_g1_i1	2	p3	(CTC)8	24	212	235
		TRINITY_DN2455_c0_g1_i6	1	p3	(GAG)8	24	1500	1523
		TRINITY_DN2455_c0_g1_i10	1	p3	(GAG)5	15	1514	1528
		TRINITY_DN2455_c0_g1_i4	1	p3	(GAG)5	15	1500	1514
		TRINITY_DN2455_c0_g1_i1	1	p3	(GAG)8	24	1514	1537
		TRINITY_DN2455_c0_g1_i3	1	p3	(GAG)5	15	1287	1301
		TRINITY_DN2455_c1_g1_i10	1	p3	(GGA)6	18	50	67
		TRINITY_DN2455_c1_g1_i5	1	p3	(AGG)7	21	46	66
		TRINITY_DN2455_c1_g1_i5	2	p2	(TG)6	12	1599	1610
		TRINITY_DN2455_c1_g1_i9	1	p3	(AGG)7	21	46	66
		TRINITY_DN2455_c1_g1_i1	1	p3	(AGG)7	21	46	66
		TRINITY_DN2455_c1_g1_i7	1	p3	(AGG)7	21	46	66
		TRINITY_DN2455_c1_g1_i11	1	p3	(AGG)7	21	46	66
		TRINITY_DN2455_c1_g1_i11	2	p2	(TG)6	12	1599	1610
		TRINITY_DN2455_c1_g1_i8	1	p3	(AGG)7	21	46	66
		TRINITY_DN2455_c1_g1_i8	2	c	(TG)8tatgtaaataa(GAG)5	42	1567	1608
		TRINITY_DN2479_c0_g1_i1	1	p1	(T)10	10	3526	3535
		TRINITY_DN2422_c0_g1_i4	1	p3	(TCC)5	15	123	137
		TRINITY_DN2422_c0_g1_i11	1	p3	(TCC)5	15	123	137
		TRINITY_DN2422_c0_g1_i5	1	p3	(TCC)5	15	123	137
		TRINITY_DN2422_c0_g1_i12	1	p3	(TCC)5	15	123	137
		TRINITY_DN2422_c0_g1_i1	1	p3	(TCC)5	15	123	137
		TRINITY_DN2422_c0_g1_i10	1	p3	(TCC)5	15	123	137
		TRINITY_DN2463_c0_g1_i11	1	p3	(CTC)5	15	210	224
		TRINITY_DN2463_c0_g1_i6	1	p3	(CTC)5	15	218	232
		TRINITY_DN2463_c0_g1_i5	1	p3	(CTC)5	15	210	224
		TRINITY_DN2463_c0_g1_i9	1	p3	(CTC)5	15	218	232
		TRINITY_DN2463_c0_g1_i9	2	p1	(A)10	10	1588	1597
		TRINITY_DN2463_c0_g1_i4	1	p3	(CTC)5	15	218	232
		TRINITY_DN2469_c0_g1_i6	1	p3	(GCC)6	18	200	217
		TRINITY_DN2469_c0_g1_i11	1	p3	(GCC)6	18	200	217
		TRINITY_DN2469_c0_g1_i18	1	p3	(GCC)6	18	200	217
		TRINITY_DN2469_c0_g1_i2	1	p1	(T)10	10	139	148
		TRINITY_DN2469_c0_g1_i10	1	p1	(T)10	10	139	148
		TRINITY_DN2469_c0_g1_i10	2	p1	(A)10	10	1572	1581
		TRINITY_DN2469_c0_g1_i15	1	p3	(GCC)6	18	200	217
		TRINITY_DN2469_c0_g1_i16	1	p1	(T)10	10	139	148
		TRINITY_DN2469_c0_g1_i16	2	p1	(T)10	10	372	381
		TRINITY_DN2469_c0_g1_i4	1	p3	(GCC)6	18	200	217
		TRINITY_DN2469_c0_g1_i9	1	p3	(GCC)6	18	200	217
		TRINITY_DN2469_c0_g1_i14	1	p3	(GCC)6	18	200	217
		TRINITY_DN2469_c0_g1_i13	1	p1	(T)10	10	372	381
		TRINITY_DN2469_c0_g1_i13	2	p1	(A)10	10	1715	1724
		TRINITY_DN2469_c0_g1_i3	1	p3	(GCC)6	18	200	217
		TRINITY_DN2469_c0_g1_i8	1	p3	(GCC)6	18	200	217
		TRINITY_DN2498_c0_g1_i7	1	p1	(A)12	12	1230	1241
		TRINITY_DN2498_c0_g1_i1	1	p1	(A)12	12	1232	1243
		TRINITY_DN2465_c0_g1_i1	1	p3	(CGG)5	15	59	73
		TRINITY_DN2465_c0_g1_i2	1	p3	(CGG)5	15	59	73
		TRINITY_DN2430_c0_g1_i6	1	p3	(GGC)5	15	176	190
		TRINITY_DN2430_c0_g1_i1	1	p3	(GGC)5	15	176	190
		TRINITY_DN2430_c0_g1_i8	1	p3	(GGC)5	15	176	190
		TRINITY_DN2430_c0_g1_i4	1	p3	(GGC)5	15	176	190
		TRINITY_DN2436_c0_g1_i5	1	p3	(GCC)5	15	338	352
		TRINITY_DN2436_c0_g1_i8	1	p1	(A)10	10	685	694
		TRINITY_DN2436_c0_g1_i9	1	p3	(GCC)5	15	268	282
		TRINITY_DN2436_c2_g1_i1	1	p3	(CCT)5	15	233	247
		TRINITY_DN2436_c2_g1_i3	1	p3	(CCT)5	15	233	247
		TRINITY_DN2436_c2_g1_i2	1	p3	(CCT)5	15	233	247
		TRINITY_DN2440_c0_g1_i4	1	p1	(T)10	10	1271	1280
		TRINITY_DN2440_c0_g1_i1	1	p1	(T)10	10	895	904
		TRINITY_DN2440_c0_g2_i1	1	p3	(TTG)8	24	987	1010
		TRINITY_DN2440_c0_g2_i3	1	p3	(TTG)5	15	1071	1085
		TRINITY_DN2488_c0_g1_i4	1	p3	(CTC)5	15	21	35
		TRINITY_DN2486_c1_g2_i4	1	p3	(GGA)5	15	239	253
		TRINITY_DN2486_c1_g2_i3	1	p3	(GGA)5	15	239	253
		TRINITY_DN2486_c1_g2_i1	1	p3	(GGA)5	15	239	253
		TRINITY_DN2486_c1_g2_i2	1	p3	(GGA)5	15	239	253
		TRINITY_DN2415_c0_g1_i8	1	p1	(T)10	10	83	92
		TRINITY_DN2415_c0_g1_i3	1	p1	(T)10	10	83	92
		TRINITY_DN2415_c0_g1_i9	1	p1	(T)10	10	83	92
		TRINITY_DN2415_c0_g1_i9	2	p1	(T)10	10	1228	1237
		TRINITY_DN2415_c0_g1_i2	1	p1	(T)10	10	2033	2042
		TRINITY_DN2415_c0_g1_i5	1	p1	(T)10	10	2033	2042
		TRINITY_DN2421_c0_g1_i2	1	p3	(CCG)8	24	69	92
		TRINITY_DN2421_c0_g1_i6	1	p3	(CCG)8	24	69	92
		TRINITY_DN2421_c0_g1_i5	1	p3	(CCG)5	15	35	49
		TRINITY_DN2421_c0_g1_i3	1	p3	(CCG)5	15	35	49
		TRINITY_DN2438_c0_g1_i1	1	p1	(T)20	20	621	640
		TRINITY_DN2438_c0_g1_i7	1	p1	(A)11	11	882	892
		TRINITY_DN2438_c0_g1_i8	1	p1	(T)20	20	638	657
		TRINITY_DN2438_c0_g1_i2	1	p2	(AC)6	12	112	123
		TRINITY_DN2438_c0_g1_i4	1	p2	(AC)6	12	112	123
		TRINITY_DN2449_c0_g1_i1	1	p3	(CTC)5	15	41	55
		TRINITY_DN2449_c0_g1_i3	1	p3	(CTC)5	15	41	55
		TRINITY_DN2449_c0_g1_i4	1	p3	(CTC)5	15	41	55
		TRINITY_DN2449_c0_g1_i5	1	p3	(CTC)5	15	41	55
		TRINITY_DN2449_c0_g1_i8	1	p3	(CTC)5	15	41	55
		TRINITY_DN2449_c0_g1_i7	1	p3	(CTC)5	15	41	55
		TRINITY_DN2431_c0_g2_i3	1	p3	(AGC)5	15	126	140
		TRINITY_DN2431_c0_g2_i4	1	p3	(AGC)5	15	126	140
		TRINITY_DN2456_c0_g1_i5	1	p1	(T)10	10	1757	1766
		TRINITY_DN2456_c0_g1_i6	1	p1	(T)10	10	1757	1766
		TRINITY_DN2405_c0_g1_i3	1	p2	(GT)6	12	4607	4618
		TRINITY_DN2405_c0_g1_i1	1	p2	(GT)6	12	4355	4366
		TRINITY_DN2405_c0_g2_i3	1	p2	(TG)6	12	3977	3988
		TRINITY_DN2405_c0_g2_i4	1	p2	(TG)6	12	3977	3988
		TRINITY_DN2405_c0_g2_i2	1	p2	(TG)6	12	3977	3988
		TRINITY_DN2453_c0_g2_i2	1	p3	(CCG)7	21	39	59
		TRINITY_DN2453_c0_g2_i2	2	p3	(CGG)5	15	316	330
		TRINITY_DN2453_c0_g2_i1	1	p3	(CCG)7	21	39	59
		TRINITY_DN2453_c0_g2_i1	2	p3	(CGG)5	15	316	330
		TRINITY_DN2453_c0_g2_i4	1	p3	(CCG)7	21	39	59
		TRINITY_DN2453_c0_g2_i4	2	p3	(CGG)5	15	316	330
		TRINITY_DN2497_c0_g1_i7	1	p3	(CTC)5	15	67	81
		TRINITY_DN2444_c0_g1_i2	1	p1	(A)11	11	902	912
		TRINITY_DN2444_c0_g1_i4	1	p1	(A)11	11	902	912
		TRINITY_DN2444_c0_g1_i6	1	c	(T)10aga(T)11	24	379	402
		TRINITY_DN2444_c1_g1_i5	1	p3	(AAG)8	24	1250	1273
		TRINITY_DN2475_c0_g1_i5	1	p2	(CT)6	12	1350	1361
		TRINITY_DN2475_c0_g1_i13	1	p2	(CT)6	12	1242	1253
		TRINITY_DN2475_c0_g1_i1	1	p2	(CT)11	22	1252	1273
		TRINITY_DN2475_c0_g1_i14	1	p2	(CT)11	22	1360	1381
		TRINITY_DN2475_c1_g1_i5	1	p1	(A)10	10	1257	1266
		TRINITY_DN2475_c1_g1_i1	1	p3	(TCC)5	15	83	97
		TRINITY_DN2475_c1_g1_i2	1	p3	(TCC)5	15	83	97
		TRINITY_DN2475_c2_g1_i1	1	p2	(CT)12	24	32	55
		TRINITY_DN2475_c2_g1_i2	1	p2	(CT)12	24	32	55
		TRINITY_DN2495_c1_g1_i2	1	p2	(TG)7	14	328	341
		TRINITY_DN2425_c0_g1_i1	1	p2	(AG)7	14	20	33
		TRINITY_DN2425_c0_g2_i3	1	p3	(GGA)5	15	237	251
		TRINITY_DN2425_c0_g2_i2	1	p3	(GGA)5	15	237	251
		TRINITY_DN2425_c0_g2_i1	1	p3	(GGA)5	15	237	251
		TRINITY_DN2476_c1_g1_i5	1	p1	(A)10	10	223	232
		TRINITY_DN2476_c1_g1_i3	1	p1	(A)10	10	223	232
		TRINITY_DN2483_c0_g1_i10	1	p2	(TC)8	16	1982	1997
		TRINITY_DN2483_c0_g1_i6	1	p2	(TC)8	16	2103	2118
		TRINITY_DN2460_c0_g1_i12	1	p1	(A)10	10	2129	2138
		TRINITY_DN2480_c1_g1_i2	1	p2	(CT)8	16	66	81
		TRINITY_DN2480_c1_g1_i6	1	p2	(CT)8	16	66	81
		TRINITY_DN2450_c0_g1_i1	1	p3	(TAC)5	15	1530	1544
		TRINITY_DN2450_c0_g1_i4	1	p4	(AGTC)5	20	1570	1589
		TRINITY_DN2414_c0_g1_i4	1	p3	(CGC)6	18	125	142
		TRINITY_DN2414_c0_g1_i2	1	p3	(CGC)6	18	125	142
		TRINITY_DN2414_c0_g1_i1	1	p3	(CGC)6	18	120	137
		TRINITY_DN2414_c0_g1_i3	1	p3	(CGC)6	18	120	137
		TRINITY_DN2414_c1_g1_i1	1	p1	(T)11	11	310	320
		TRINITY_DN2414_c1_g1_i18	1	p1	(T)11	11	310	320
		TRINITY_DN2414_c1_g1_i19	1	p3	(GCC)7	21	30	50
		TRINITY_DN2414_c1_g1_i2	1	p1	(T)11	11	310	320
		TRINITY_DN2446_c0_g1_i5	1	p4	(GATG)5	20	196	215
		TRINITY_DN2446_c0_g1_i3	1	p4	(GATG)5	20	695	714
		TRINITY_DN2446_c0_g1_i6	1	p4	(GATG)5	20	399	418
		TRINITY_DN2446_c0_g1_i6	2	p2	(AG)7	14	557	570
		TRINITY_DN2446_c0_g1_i4	1	p2	(AG)7	14	355	368
		TRINITY_DN2446_c1_g1_i7	1	p3	(TCT)5	15	197	211
		TRINITY_DN2446_c1_g1_i3	1	p3	(TCT)5	15	197	211
		TRINITY_DN2446_c1_g1_i5	1	p3	(TCT)5	15	197	211
		TRINITY_DN2412_c0_g1_i5	1	p2	(TC)6	12	156	167
		TRINITY_DN2412_c0_g1_i5	2	p2	(GA)6	12	5726	5737
		TRINITY_DN2412_c0_g1_i4	1	p2	(TC)6	12	156	167
		TRINITY_DN2412_c0_g1_i2	1	p2	(TC)6	12	156	167
		TRINITY_DN2412_c0_g1_i3	1	p2	(TC)6	12	156	167
		TRINITY_DN2427_c0_g1_i3	1	p3	(CGT)5	15	834	848
		TRINITY_DN2427_c1_g1_i3	1	p3	(CCT)6	18	151	168
		TRINITY_DN2427_c1_g1_i7	1	p3	(CCT)6	18	151	168
		TRINITY_DN2427_c1_g1_i5	1	p3	(CCT)6	18	151	168
		TRINITY_DN2427_c1_g1_i9	1	p3	(CCT)6	18	151	168
		TRINITY_DN2427_c1_g1_i8	1	p3	(CCT)6	18	151	168
		TRINITY_DN2484_c0_g1_i5	1	p1	(A)11	11	708	718
		TRINITY_DN2474_c0_g1_i3	1	p2	(AG)13	26	13	38
		TRINITY_DN2474_c0_g1_i2	1	p2	(AG)13	26	13	38
		TRINITY_DN2474_c0_g1_i7	1	p1	(T)13	13	836	848
		TRINITY_DN2461_c0_g1_i1	1	p3	(GGA)5	15	1730	1744
		TRINITY_DN2461_c0_g1_i7	1	p3	(GGA)5	15	1449	1463
		TRINITY_DN2461_c0_g1_i9	1	p3	(GGA)5	15	1449	1463
		TRINITY_DN2461_c0_g1_i8	1	p3	(GGA)6	18	1449	1466
		TRINITY_DN2461_c0_g1_i3	1	p3	(CCA)6	18	68	85
		TRINITY_DN2461_c0_g1_i3	2	p3	(GGA)6	18	1449	1466
		TRINITY_DN2461_c0_g1_i5	1	c	(CTC)5(CAC)5	30	54	83
		TRINITY_DN596_c0_g1_i1	1	c	(CAT)6cgttcatagattggcacattcatccttgtattgaagttgatatcacctc(CAT)6	85	5625	5709
		TRINITY_DN596_c0_g1_i2	1	p3	(CAT)6	18	5691	5708
		TRINITY_DN596_c0_g1_i6	1	p3	(CAT)6	18	5691	5708
		TRINITY_DN596_c0_g1_i3	1	p3	(CAT)6	18	5691	5708
		TRINITY_DN596_c0_g1_i3	2	p2	(TG)9	18	7313	7330
		TRINITY_DN549_c0_g1_i6	1	p3	(GTC)5	15	1253	1267
		TRINITY_DN549_c0_g1_i8	1	p3	(GTC)5	15	1253	1267
		TRINITY_DN549_c0_g1_i9	1	p3	(GTC)5	15	1173	1187
		TRINITY_DN549_c0_g1_i5	1	p3	(GTC)5	15	1400	1414
		TRINITY_DN523_c0_g1_i4	1	c	(TCCT)5tccgtccgtcctcactcccctcctcctcctcccggcgatcgcagagaatt(CGC)5	85	132	216
		TRINITY_DN523_c0_g1_i5	1	c	(TCCT)5tccgtccgtcctcactcccctcctcctcctcccggcgatcgcagagaatt(CGC)5	85	132	216
		TRINITY_DN561_c0_g1_i2	1	p3	(AGG)5	15	137	151
		TRINITY_DN561_c0_g1_i7	1	p3	(GCT)6	18	2011	2028
		TRINITY_DN561_c0_g1_i5	1	p3	(AGG)5	15	137	151
		TRINITY_DN561_c0_g1_i6	1	p3	(AGG)5	15	137	151
		TRINITY_DN561_c0_g1_i6	2	p3	(TGC)5	15	1804	1818
		TRINITY_DN561_c0_g1_i6	3	p3	(GCT)6	18	2004	2021
		TRINITY_DN561_c0_g1_i1	1	p3	(AGG)5	15	137	151
		TRINITY_DN561_c0_g1_i1	2	p3	(GCT)6	18	2004	2021
		TRINITY_DN538_c0_g1_i2	1	p4	(AGGA)5	20	2821	2840
		TRINITY_DN538_c0_g1_i1	1	p4	(AGGA)5	20	2845	2864
		TRINITY_DN538_c0_g1_i3	1	p4	(AGGA)5	20	2813	2832
		TRINITY_DN586_c1_g1_i10	1	p3	(GCG)5	15	208	222
		TRINITY_DN586_c1_g1_i12	1	p3	(GCG)5	15	208	222
		TRINITY_DN586_c1_g1_i6	1	p3	(GCG)5	15	208	222
		TRINITY_DN586_c1_g1_i5	1	p3	(GCG)7	21	27	47
		TRINITY_DN530_c0_g1_i7	1	p3	(CGC)5	15	132	146
		TRINITY_DN530_c0_g1_i1	1	p3	(CGC)5	15	132	146
		TRINITY_DN530_c0_g1_i8	1	p3	(CGC)5	15	132	146
		TRINITY_DN530_c0_g1_i2	1	p3	(CGC)5	15	132	146
		TRINITY_DN530_c0_g1_i5	1	p3	(CGC)5	15	132	146
		TRINITY_DN569_c0_g1_i3	1	p4	(AAGC)6	24	360	383
		TRINITY_DN569_c0_g1_i5	1	p4	(AAGC)6	24	360	383
		TRINITY_DN569_c0_g1_i2	1	p4	(AAGC)6	24	360	383
		TRINITY_DN569_c0_g1_i7	1	p4	(AAGC)6	24	360	383
		TRINITY_DN588_c0_g1_i1	1	p1	(A)10	10	3132	3141
		TRINITY_DN507_c0_g1_i5	1	p3	(TGT)7	21	1188	1208
		TRINITY_DN507_c0_g1_i7	1	p3	(GAC)6	18	1955	1972
		TRINITY_DN507_c0_g1_i6	1	p3	(TGT)7	21	1187	1207
		TRINITY_DN507_c0_g1_i2	1	p3	(TGT)7	21	1188	1208
		TRINITY_DN507_c0_g1_i8	1	p3	(TGT)7	21	1187	1207
		TRINITY_DN507_c0_g1_i9	1	p3	(TGT)7	21	1184	1204
		TRINITY_DN550_c0_g1_i8	1	p3	(GAG)5	15	163	177
		TRINITY_DN550_c0_g1_i3	1	p3	(GAG)5	15	163	177
		TRINITY_DN550_c0_g1_i3	2	p1	(A)10	10	1646	1655
		TRINITY_DN540_c0_g1_i11	1	p2	(TG)8	16	1758	1773
		TRINITY_DN540_c0_g1_i8	1	p2	(TG)8	16	1758	1773
		TRINITY_DN573_c0_g2_i1	1	p2	(TG)6	12	193	204
		TRINITY_DN582_c0_g1_i5	1	p3	(AGC)5	15	277	291
		TRINITY_DN582_c0_g1_i6	1	p3	(AGC)5	15	291	305
		TRINITY_DN582_c0_g1_i2	1	p3	(AGC)5	15	291	305
		TRINITY_DN582_c0_g1_i3	1	p3	(AGC)5	15	277	291
		TRINITY_DN518_c0_g1_i6	1	p3	(CCT)5	15	568	582
		TRINITY_DN518_c0_g1_i5	1	p3	(GCG)6	18	217	234
		TRINITY_DN518_c0_g1_i10	1	p3	(CCT)5	15	568	582
		TRINITY_DN518_c0_g1_i8	1	p3	(GCG)6	18	219	236
		TRINITY_DN518_c0_g1_i9	1	p3	(GCG)6	18	217	234
		TRINITY_DN518_c0_g1_i1	1	p3	(GCG)6	18	217	234
		TRINITY_DN518_c0_g1_i3	1	p3	(GCG)6	18	217	234
		TRINITY_DN577_c0_g1_i1	1	p3	(CCG)5	15	257	271
		TRINITY_DN577_c0_g1_i4	1	p3	(CCG)5	15	257	271
		TRINITY_DN577_c0_g1_i5	1	p3	(CCG)5	15	257	271
		TRINITY_DN597_c0_g2_i2	1	p4	(ATGG)5	20	404	423
		TRINITY_DN597_c0_g2_i4	1	p4	(ATGG)5	20	404	423
		TRINITY_DN597_c0_g2_i1	1	p4	(ATGG)5	20	404	423
		TRINITY_DN597_c0_g3_i4	1	p2	(TG)8	16	1517	1532
		TRINITY_DN597_c0_g3_i4	2	p2	(TA)7	14	1921	1934
		TRINITY_DN597_c0_g3_i5	1	p2	(TG)8	16	895	910
		TRINITY_DN597_c0_g3_i5	2	p2	(TA)7	14	1299	1312
		TRINITY_DN597_c0_g3_i2	1	p2	(TG)8	16	517	532
		TRINITY_DN597_c0_g3_i2	2	p2	(TA)7	14	921	934
		TRINITY_DN597_c1_g1_i7	1	p3	(GCG)6	18	160	177
		TRINITY_DN597_c1_g1_i8	1	p3	(GCG)5	15	160	174
		TRINITY_DN516_c0_g1_i2	1	p1	(T)11	11	711	721
		TRINITY_DN570_c0_g1_i2	1	p2	(CT)6	12	1152	1163
		TRINITY_DN570_c0_g1_i1	1	p2	(CT)6	12	695	706
		TRINITY_DN579_c0_g1_i12	1	p3	(AGC)6	18	433	450
		TRINITY_DN579_c0_g1_i4	1	p3	(GAG)6	18	55	72
		TRINITY_DN579_c0_g1_i4	2	p3	(AGC)6	18	651	668
		TRINITY_DN579_c0_g1_i1	1	p3	(GAG)6	18	55	72
		TRINITY_DN579_c0_g1_i1	2	p3	(AGC)6	18	552	569
		TRINITY_DN579_c0_g1_i8	1	p3	(GAG)6	18	55	72
		TRINITY_DN579_c0_g1_i8	2	p3	(AGC)6	18	651	668
		TRINITY_DN579_c0_g1_i11	1	p3	(GAG)6	18	55	72
		TRINITY_DN579_c0_g1_i11	2	p3	(AGC)6	18	651	668
		TRINITY_DN579_c0_g1_i3	1	p3	(AGC)6	18	339	356
		TRINITY_DN579_c0_g1_i5	1	p3	(AGC)6	18	433	450
		TRINITY_DN579_c0_g1_i2	1	p3	(AGC)6	18	339	356
		TRINITY_DN579_c0_g1_i9	1	p3	(AGC)6	18	339	356
		TRINITY_DN579_c1_g1_i1	1	p2	(GA)6	12	98	109
		TRINITY_DN579_c1_g1_i2	1	p2	(GA)6	12	98	109
		TRINITY_DN581_c0_g1_i2	1	p3	(TGT)10	30	3970	3999
		TRINITY_DN581_c0_g1_i7	1	p3	(TGT)12	36	3970	4005
		TRINITY_DN581_c0_g1_i5	1	p3	(TGT)12	36	3966	4001
		TRINITY_DN581_c0_g1_i1	1	p3	(TGT)12	36	3967	4002
		TRINITY_DN521_c0_g2_i1	1	p3	(TTG)5	15	745	759
		TRINITY_DN547_c1_g1_i1	1	p3	(CTT)5	15	214	228
		TRINITY_DN587_c0_g1_i4	1	p1	(A)10	10	1562	1571
		TRINITY_DN587_c0_g1_i2	1	p1	(A)10	10	1585	1594
		TRINITY_DN535_c0_g1_i4	1	p3	(GGC)5	15	181	195
		TRINITY_DN535_c0_g1_i11	1	p3	(GGC)5	15	181	195
		TRINITY_DN535_c0_g1_i18	1	p3	(GGC)5	15	153	167
		TRINITY_DN535_c0_g1_i16	1	p3	(GGC)5	15	181	195
		TRINITY_DN535_c0_g1_i2	1	p3	(GGC)5	15	153	167
		TRINITY_DN535_c0_g1_i6	1	p3	(GGC)5	15	153	167
		TRINITY_DN535_c0_g1_i13	1	p3	(GGC)6	18	153	170
		TRINITY_DN535_c0_g1_i14	1	p3	(GGC)6	18	153	170
		TRINITY_DN535_c0_g1_i15	1	p3	(GGC)6	18	153	170
		TRINITY_DN522_c0_g1_i8	1	p2	(TG)6	12	411	422
		TRINITY_DN522_c0_g1_i10	1	p2	(TG)6	12	265	276
		TRINITY_DN522_c0_g1_i5	1	p2	(TG)6	12	411	422
		TRINITY_DN522_c0_g1_i7	1	p2	(TG)6	12	411	422
		TRINITY_DN522_c0_g1_i2	1	p2	(TG)6	12	411	422
		TRINITY_DN522_c0_g1_i9	1	p2	(TG)6	12	411	422
		TRINITY_DN522_c0_g1_i6	1	p2	(TG)6	12	411	422
		TRINITY_DN522_c0_g1_i1	1	p2	(TG)6	12	411	422
		TRINITY_DN522_c0_g1_i3	1	p2	(TG)6	12	411	422
		TRINITY_DN522_c0_g1_i4	1	p2	(TG)6	12	265	276
		TRINITY_DN522_c1_g1_i9	1	p2	(AT)6	12	2223	2234
		TRINITY_DN522_c1_g1_i5	1	p2	(AT)6	12	2260	2271
		TRINITY_DN522_c1_g1_i6	1	p2	(AT)6	12	2260	2271
		TRINITY_DN522_c1_g1_i11	1	p2	(AT)6	12	2223	2234
		TRINITY_DN522_c1_g1_i4	1	p2	(AT)6	12	2267	2278
		TRINITY_DN522_c1_g1_i10	1	p2	(AT)6	12	2230	2241
		TRINITY_DN560_c4_g2_i5	1	p3	(CCG)5	15	112	126
		TRINITY_DN531_c0_g1_i11	1	p1	(C)10	10	314	323
		TRINITY_DN599_c0_g1_i3	1	p3	(CCG)7	21	46	66
		TRINITY_DN599_c0_g1_i6	1	p3	(CCG)6	18	46	63
		TRINITY_DN599_c0_g1_i7	1	p3	(CCG)7	21	46	66
		TRINITY_DN599_c0_g1_i1	1	p3	(CCG)6	18	46	63
		TRINITY_DN599_c0_g1_i2	1	p3	(CCG)7	21	46	66
		TRINITY_DN599_c0_g1_i8	1	p3	(CCG)7	21	46	66
		TRINITY_DN512_c0_g1_i5	1	p3	(CCT)5	15	1519	1533
		TRINITY_DN520_c0_g1_i6	1	p3	(TGA)5	15	1346	1360
		TRINITY_DN520_c0_g1_i4	1	p3	(TGA)5	15	1346	1360
		TRINITY_DN520_c0_g1_i1	1	p3	(TGA)5	15	1346	1360
		TRINITY_DN595_c0_g1_i6	1	p1	(T)12	12	2756	2767
		TRINITY_DN595_c0_g1_i10	1	p1	(T)12	12	2756	2767
		TRINITY_DN595_c0_g1_i7	1	p1	(T)12	12	2756	2767
		TRINITY_DN515_c0_g2_i1	1	c	(CA)8crcacr(CA)6	34	29	62
		TRINITY_DN529_c0_g2_i2	1	p3	(GCC)5	15	69	83
		TRINITY_DN529_c0_g2_i3	1	p3	(GCC)5	15	69	83
		TRINITY_DN529_c0_g2_i4	1	p3	(GCC)5	15	69	83
		TRINITY_DN529_c0_g2_i1	1	p3	(GCC)5	15	69	83
		TRINITY_DN529_c4_g1_i1	1	p2	(TG)6	12	176	187
		TRINITY_DN532_c0_g1_i1	1	p2	(GT)18	36	681	716
		TRINITY_DN532_c0_g1_i5	1	p4	(TGAT)5	20	169	188
		TRINITY_DN532_c0_g1_i5	2	p3	(CTG)5	15	1748	1762
		TRINITY_DN532_c0_g1_i5	3	c	(A)10g(A)10	21	2817	2837
		TRINITY_DN532_c0_g1_i2	1	p4	(TGAT)5	20	169	188
		TRINITY_DN532_c0_g1_i2	2	p3	(CTG)5	15	1748	1762
		TRINITY_DN532_c0_g1_i4	1	p2	(GT)18	36	686	721
		TRINITY_DN532_c0_g1_i3	1	p2	(GT)18	36	700	735
		TRINITY_DN532_c0_g3_i2	1	p4	(GCGT)5	20	143	162
		TRINITY_DN532_c0_g3_i1	1	p4	(GCGT)5	20	143	162
		TRINITY_DN557_c0_g1_i8	1	p1	(A)10	10	336	345
		TRINITY_DN557_c0_g1_i2	1	p1	(A)10	10	336	345
		TRINITY_DN557_c0_g1_i3	1	p1	(A)10	10	336	345
		TRINITY_DN541_c0_g1_i15	1	p3	(AGA)5	15	619	633
		TRINITY_DN541_c0_g1_i1	1	p3	(AGA)6	18	632	649
		TRINITY_DN541_c0_g1_i6	1	p3	(AGA)5	15	619	633
		TRINITY_DN541_c0_g1_i9	1	p3	(AGA)5	15	619	633
		TRINITY_DN541_c0_g1_i18	1	p3	(AGA)6	18	632	649
		TRINITY_DN541_c0_g1_i11	1	p3	(AGA)6	18	632	649
		TRINITY_DN541_c0_g1_i21	1	p3	(AGA)5	15	619	633
		TRINITY_DN541_c0_g1_i20	1	p3	(AGA)5	15	619	633
		TRINITY_DN541_c0_g1_i14	1	p3	(AGA)6	18	632	649
		TRINITY_DN541_c0_g1_i4	1	p3	(AGA)5	15	619	633
		TRINITY_DN541_c0_g1_i12	1	p3	(AGA)5	15	619	633
		TRINITY_DN541_c0_g1_i8	1	p3	(AGA)5	15	619	633
		TRINITY_DN541_c0_g1_i13	1	p3	(AGA)5	15	619	633
		TRINITY_DN541_c0_g1_i19	1	p3	(AGA)6	18	632	649
		TRINITY_DN541_c0_g1_i16	1	p3	(AGA)5	15	619	633
		TRINITY_DN541_c0_g1_i5	1	p3	(AGA)5	15	619	633
		TRINITY_DN574_c0_g1_i3	1	p4	(ATCC)5	20	105	124
		TRINITY_DN551_c0_g1_i7	1	p3	(GCC)5	15	258	272
		TRINITY_DN551_c0_g1_i3	1	p3	(GCC)5	15	258	272
		TRINITY_DN551_c0_g1_i13	1	p3	(GCC)5	15	258	272
		TRINITY_DN551_c0_g1_i5	1	p3	(GCC)5	15	258	272
		TRINITY_DN551_c0_g1_i4	1	p3	(GCC)5	15	258	272
		TRINITY_DN551_c0_g1_i9	1	p3	(GCC)5	15	258	272
		TRINITY_DN551_c0_g1_i8	1	p3	(GCC)5	15	258	272
		TRINITY_DN551_c0_g1_i1	1	p3	(GCC)5	15	258	272
		TRINITY_DN552_c1_g1_i6	1	p3	(GCG)5	15	672	686
		TRINITY_DN552_c1_g1_i5	1	p3	(GCG)5	15	672	686
		TRINITY_DN564_c1_g1_i3	1	p1	(A)10	10	925	934
		TRINITY_DN501_c0_g1_i2	1	p4	(GGAC)5	20	1291	1310
		TRINITY_DN501_c1_g1_i2	1	p3	(GGA)6	18	33	50
		TRINITY_DN501_c2_g1_i2	1	c	(GACG)6gaccgacgggaggttcccgaaatggcggtttcggccaaggagcgcaagctgagcaggctcggcagtggtaaggcggcaaac(GGA)5	120	185	304
		TRINITY_DN501_c2_g1_i1	1	p3	(GGA)5	15	230	244
		TRINITY_DN534_c1_g1_i2	1	p3	(AGA)8	24	1877	1900
		TRINITY_DN534_c1_g1_i1	1	p3	(AGA)8	24	1874	1897
		TRINITY_DN534_c1_g1_i5	1	p3	(GCC)7	21	27	47
		TRINITY_DN589_c0_g2_i4	1	p2	(TG)7	14	866	879
		TRINITY_DN589_c0_g2_i1	1	p2	(TG)7	14	866	879
		TRINITY_DN589_c1_g1_i9	1	c	(GT)6(GC)6	24	1890	1913
		TRINITY_DN589_c1_g1_i1	1	c	(GT)6(GC)6	24	2143	2166
		TRINITY_DN527_c0_g2_i8	1	p3	(CGG)5	15	571	585
		TRINITY_DN527_c0_g2_i8	2	p6	(TTTTTC)5	30	2158	2187
		TRINITY_DN527_c0_g2_i6	1	p3	(CGG)5	15	571	585
		TRINITY_DN527_c0_g2_i5	1	p3	(CGG)5	15	572	586
		TRINITY_DN527_c0_g2_i10	1	p3	(CGG)5	15	571	585
		TRINITY_DN527_c0_g2_i10	2	p2	(CT)6	12	1361	1372
		TRINITY_DN527_c0_g2_i1	1	p3	(CGG)5	15	571	585
		TRINITY_DN527_c0_g2_i1	2	p6	(TTTTTC)5	30	2021	2050
		TRINITY_DN527_c0_g2_i3	1	p3	(GCA)5	15	376	390
		TRINITY_DN527_c0_g2_i3	2	p3	(CGG)5	15	577	591
		TRINITY_DN527_c0_g2_i3	3	p2	(CT)6	12	1230	1241
		TRINITY_DN568_c0_g3_i2	1	p3	(CGA)5	15	647	661
		TRINITY_DN568_c0_g3_i3	1	p3	(CGA)5	15	653	667
		TRINITY_DN508_c4_g1_i1	1	p2	(TG)6	12	542	553
		TRINITY_DN508_c4_g1_i1	2	p3	(CAT)5	15	670	684
		TRINITY_DN508_c4_g1_i3	1	p2	(TG)6	12	542	553
		TRINITY_DN45123_c0_g1_i4	1	p3	(GCC)5	15	465	479
		TRINITY_DN45123_c0_g1_i3	1	p3	(GCC)5	15	577	591
		TRINITY_DN45123_c0_g1_i1	1	p2	(CT)6	12	143	154
		TRINITY_DN45123_c0_g1_i1	2	p3	(GCC)5	15	475	489
		TRINITY_DN45123_c0_g1_i2	1	p3	(GCC)5	15	452	466
		TRINITY_DN45123_c0_g1_i5	1	p3	(GCC)5	15	495	509
		TRINITY_DN45122_c0_g1_i1	1	p1	(T)13	13	937	949
		TRINITY_DN45118_c0_g1_i6	1	c	(TG)8nnnnnnnnnnnnnnnnnngtttctttgtctgtttcttgtgtgcaagcgctccat(TG)8	86	363	448
		TRINITY_DN45118_c0_g1_i4	1	p2	(TG)8	16	290	305
		TRINITY_DN45118_c0_g1_i1	1	p2	(TG)6	12	190	201
		TRINITY_DN45152_c0_g1_i1	1	p2	(AT)8	16	583	598
		TRINITY_DN45131_c0_g1_i1	1	p1	(T)10	10	2114	2123
		TRINITY_DN45187_c0_g2_i1	1	p3	(AAG)5	15	60	74
		TRINITY_DN45161_c2_g1_i1	1	p2	(TG)7	14	98	111
		TRINITY_DN45186_c0_g2_i8	1	p3	(CGG)5	15	332	346
		TRINITY_DN45177_c0_g2_i4	1	p3	(GCC)6	18	186	203
		TRINITY_DN45188_c0_g1_i6	1	p1	(C)11	11	1578	1588
		TRINITY_DN45165_c0_g3_i1	1	p1	(T)13	13	177	189
		TRINITY_DN45104_c0_g2_i1	1	p1	(A)10	10	139	148
		TRINITY_DN45135_c1_g2_i1	1	p1	(A)10	10	127	136
		TRINITY_DN45150_c0_g1_i1	1	p3	(GAG)5	15	441	455
		TRINITY_DN99942_c0_g1_i1	1	c	(A)12cttac(T)10	27	625	651
		TRINITY_DN99982_c0_g1_i1	1	p3	(GCC)7	21	186	206
		TRINITY_DN5991_c0_g1_i2	1	p3	(CAC)6	18	441	458
		TRINITY_DN5991_c0_g1_i8	1	p2	(CA)9	18	23	40
		TRINITY_DN5907_c0_g2_i5	1	p3	(CGC)5	15	67	81
		TRINITY_DN5907_c0_g2_i4	1	p3	(CGC)5	15	67	81
		TRINITY_DN5907_c0_g2_i1	1	p3	(CGC)7	21	67	87
		TRINITY_DN5907_c0_g2_i3	1	p3	(CGC)5	15	67	81
		TRINITY_DN5950_c0_g1_i8	1	p3	(CAG)7	21	134	154
		TRINITY_DN5950_c0_g1_i5	1	p3	(CAG)7	21	134	154
		TRINITY_DN5950_c0_g1_i4	1	p3	(CAG)7	21	134	154
		TRINITY_DN5950_c0_g1_i6	1	p3	(CAG)7	21	134	154
		TRINITY_DN5950_c1_g1_i1	1	p3	(GCA)6	18	136	153
		TRINITY_DN5928_c1_g1_i4	1	p3	(GTC)5	15	562	576
		TRINITY_DN5928_c1_g1_i6	1	p3	(GTC)5	15	553	567
		TRINITY_DN5928_c1_g1_i1	1	p3	(GTC)5	15	553	567
		TRINITY_DN5928_c1_g1_i2	1	p3	(GTC)5	15	553	567
		TRINITY_DN5928_c1_g1_i3	1	p3	(GTC)5	15	565	579
		TRINITY_DN5916_c0_g1_i17	1	p1	(T)10	10	1268	1277
		TRINITY_DN5916_c0_g1_i18	1	p1	(T)10	10	1256	1265
		TRINITY_DN5916_c0_g1_i15	1	p1	(T)10	10	1292	1301
		TRINITY_DN5916_c0_g1_i3	1	p1	(T)10	10	1249	1258
		TRINITY_DN5916_c0_g1_i5	1	p1	(T)10	10	1261	1270
		TRINITY_DN5916_c0_g1_i4	1	p1	(T)10	10	1285	1294
		TRINITY_DN5974_c0_g1_i3	1	p2	(TG)7	14	659	672
		TRINITY_DN5974_c0_g1_i1	1	p2	(TG)8	16	497	512
		TRINITY_DN5922_c0_g1_i2	1	p3	(GCC)6	18	76	93
		TRINITY_DN5922_c0_g1_i7	1	p3	(GCC)6	18	76	93
		TRINITY_DN5922_c0_g1_i4	1	p3	(GCC)6	18	76	93
		TRINITY_DN5922_c0_g1_i1	1	p3	(GCC)6	18	76	93
		TRINITY_DN5922_c0_g1_i3	1	p3	(GCC)5	15	79	93
		TRINITY_DN5922_c0_g1_i5	1	p3	(GCC)6	18	76	93
		TRINITY_DN5922_c0_g1_i6	1	p3	(GCC)6	18	76	93
		TRINITY_DN5922_c1_g1_i1	1	p3	(GCC)5	15	197	211
		TRINITY_DN5937_c0_g1_i8	1	p3	(GAT)5	15	638	652
		TRINITY_DN5937_c0_g1_i13	1	p3	(GAT)5	15	653	667
		TRINITY_DN5937_c0_g1_i6	1	c	(GAT)5aataagtttccgacgtcgccgaacagccttgcctttgcctttttagccgcttccacagaatccgatacttgagatgatgac(GAT)5	111	653	763
		TRINITY_DN5937_c0_g1_i10	1	c	(GAT)5aataagtttccgatgtcgtcgaacagcctttcctttgccttgttagctgcttccacagaatctaagacttga(GAT)5	102	648	749
		TRINITY_DN5937_c0_g1_i3	1	p3	(GAT)5	15	638	652
		TRINITY_DN5937_c0_g1_i5	1	p3	(GAT)5	15	653	667
		TRINITY_DN5937_c1_g1_i4	1	p3	(ATG)8	24	1290	1313
		TRINITY_DN5977_c0_g2_i1	1	p3	(GAG)6	18	114	131
		TRINITY_DN5929_c0_g1_i1	1	p1	(A)14	14	1176	1189
		TRINITY_DN5993_c0_g1_i10	1	p2	(CT)6	12	63	74
		TRINITY_DN5993_c0_g1_i14	1	p2	(CT)6	12	63	74
		TRINITY_DN5993_c0_g1_i3	1	p2	(CT)6	12	63	74
		TRINITY_DN5972_c0_g1_i3	1	p4	(TTCC)5	20	40	59
		TRINITY_DN5972_c0_g1_i2	1	p4	(TTCC)5	20	40	59
		TRINITY_DN5972_c0_g2_i1	1	p3	(CCT)6	18	111	128
		TRINITY_DN5972_c2_g1_i6	1	p3	(GCC)5	15	299	313
		TRINITY_DN5972_c2_g1_i2	1	p3	(GCC)5	15	317	331
		TRINITY_DN5968_c0_g1_i1	1	p2	(GC)6	12	376	387
		TRINITY_DN5968_c0_g1_i3	1	p2	(GC)6	12	376	387
		TRINITY_DN5968_c0_g1_i2	1	p2	(GC)6	12	376	387
		TRINITY_DN5998_c0_g2_i5	1	c	(CTC)7acgtccaaactgctggtgctcctctcaacctcctcctg(CT)26	111	911	1021
		TRINITY_DN5998_c1_g1_i4	1	p3	(CTC)7	21	33	53
		TRINITY_DN5998_c1_g1_i6	1	p3	(CTC)7	21	33	53
		TRINITY_DN5998_c3_g1_i1	1	p3	(CTC)7	21	151	171
		TRINITY_DN5999_c0_g1_i3	1	p3	(TCC)6	18	153	170
		TRINITY_DN5999_c0_g1_i2	1	p3	(TCC)6	18	153	170
		TRINITY_DN5914_c0_g2_i3	1	p3	(CTT)5	15	20	34
		TRINITY_DN5930_c2_g1_i1	1	p1	(A)11	11	533	543
		TRINITY_DN5930_c2_g1_i2	1	p1	(A)11	11	412	422
		TRINITY_DN5900_c0_g1_i2	1	p1	(A)10	10	641	650
		TRINITY_DN5900_c0_g1_i3	1	p1	(A)10	10	253	262
		TRINITY_DN5918_c0_g2_i7	1	p3	(GCC)5	15	66	80
		TRINITY_DN5918_c0_g2_i6	1	p3	(GCC)5	15	66	80
		TRINITY_DN5918_c0_g2_i2	1	p3	(GCC)5	15	66	80
		TRINITY_DN5918_c0_g2_i5	1	p3	(GCC)5	15	66	80
		TRINITY_DN5988_c0_g4_i1	1	p3	(CTT)5	15	922	936
		TRINITY_DN5988_c0_g4_i2	1	p3	(CTT)5	15	922	936
		TRINITY_DN5989_c0_g1_i3	1	p3	(GCG)5	15	44	58
		TRINITY_DN5989_c0_g1_i3	2	p3	(GAG)5	15	215	229
		TRINITY_DN5989_c0_g1_i5	1	p3	(GAG)5	15	215	229
		TRINITY_DN5989_c0_g1_i4	1	p3	(GAG)5	15	215	229
		TRINITY_DN5989_c0_g1_i4	2	p1	(T)12	12	1105	1116
		TRINITY_DN5989_c0_g1_i7	1	p3	(GCG)5	15	44	58
		TRINITY_DN5989_c0_g1_i7	2	p3	(GAG)5	15	215	229
		TRINITY_DN5989_c0_g1_i2	1	p3	(GCG)5	15	44	58
		TRINITY_DN5989_c0_g1_i6	1	p3	(GCG)5	15	44	58
		TRINITY_DN5989_c0_g1_i6	2	p3	(GAG)5	15	215	229
		TRINITY_DN5935_c0_g1_i2	1	p2	(TG)12	24	834	857
		TRINITY_DN5932_c0_g1_i1	1	p1	(T)10	10	1317	1326
		TRINITY_DN5994_c1_g1_i1	1	p2	(GA)6	12	288	299
		TRINITY_DN5973_c0_g1_i3	1	p4	(TCTT)8	32	786	817
		TRINITY_DN5992_c0_g1_i18	1	p2	(CA)6	12	459	470
		TRINITY_DN5992_c0_g1_i8	1	p2	(CA)6	12	459	470
		TRINITY_DN5992_c0_g1_i17	1	p2	(CA)6	12	459	470
		TRINITY_DN5992_c0_g1_i14	1	p2	(CA)6	12	866	877
		TRINITY_DN5970_c0_g1_i2	1	p3	(CGC)5	15	52	66
		TRINITY_DN5970_c0_g1_i1	1	p3	(CGC)5	15	227	241
		TRINITY_DN5970_c0_g1_i4	1	p3	(CGC)5	15	227	241
		TRINITY_DN5970_c0_g1_i4	2	p1	(T)12	12	849	860
		TRINITY_DN5970_c0_g1_i5	1	p3	(CGC)5	15	52	66
		TRINITY_DN5944_c0_g1_i10	1	p3	(GGA)5	15	638	652
		TRINITY_DN5944_c0_g1_i10	2	p1	(T)10	10	4058	4067
		TRINITY_DN5944_c0_g1_i16	1	p3	(GGA)5	15	635	649
		TRINITY_DN5944_c0_g1_i17	1	p1	(T)10	10	4029	4038
		TRINITY_DN5944_c0_g1_i2	1	p3	(GGA)5	15	638	652
		TRINITY_DN5944_c0_g1_i3	1	p3	(GGA)5	15	609	623
		TRINITY_DN5944_c0_g1_i11	1	p3	(GGA)5	15	635	649
		TRINITY_DN5944_c0_g1_i15	1	p3	(GGA)5	15	638	652
		TRINITY_DN5944_c0_g1_i14	1	p3	(GGA)5	15	609	623
		TRINITY_DN5944_c0_g1_i18	1	p3	(GGA)5	15	609	623
		TRINITY_DN5944_c0_g1_i4	1	p3	(GGA)5	15	638	652
		TRINITY_DN5944_c0_g1_i19	1	p3	(GGA)5	15	609	623
		TRINITY_DN5940_c0_g1_i1	1	p3	(CCT)5	15	48	62
		TRINITY_DN5940_c0_g1_i3	1	p3	(CCT)5	15	48	62
		TRINITY_DN5949_c0_g1_i6	1	p2	(GA)8	16	212	227
		TRINITY_DN5949_c0_g1_i5	1	p2	(GA)8	16	212	227
		TRINITY_DN5949_c1_g1_i5	1	c	(CTCAT)6ctgc(TGTAT)5	59	2	60
		TRINITY_DN5949_c1_g1_i4	1	p5	(TGTAT)5	25	36	60
		TRINITY_DN5949_c1_g1_i3	1	p5	(TGTAT)5	25	36	60
		TRINITY_DN5949_c2_g1_i1	1	p2	(GA)14	28	1	28
		TRINITY_DN5949_c3_g1_i2	1	p5	(GGAAA)10	50	178	227
		TRINITY_DN5924_c1_g1_i9	1	p2	(CT)7	14	44	57
		TRINITY_DN5969_c0_g1_i2	1	p2	(TC)19	38	77	114
		TRINITY_DN5969_c0_g1_i4	1	p2	(TC)19	38	77	114
		TRINITY_DN5912_c0_g1_i7	1	p3	(CGC)5	15	16	30
		TRINITY_DN5912_c0_g1_i3	1	p3	(CCG)7	21	17	37
		TRINITY_DN5912_c0_g1_i2	1	p3	(CCG)7	21	17	37
		TRINITY_DN5912_c0_g1_i6	1	p3	(CCG)7	21	17	37
		TRINITY_DN5934_c0_g1_i2	1	p1	(A)10	10	1589	1598
		TRINITY_DN5934_c0_g1_i8	1	p1	(A)10	10	1590	1599
		TRINITY_DN5976_c0_g1_i1	1	p3	(GCC)5	15	336	350
		TRINITY_DN5976_c0_g1_i6	1	p3	(GCC)5	15	285	299
		TRINITY_DN5976_c0_g1_i5	1	p3	(GCC)5	15	336	350
		TRINITY_DN5976_c0_g1_i3	1	p3	(GCC)5	15	336	350
		TRINITY_DN5976_c0_g1_i2	1	p3	(GCC)5	15	336	350
		TRINITY_DN84534_c1_g1_i2	1	p2	(GT)7	14	227	240
		TRINITY_DN84561_c0_g1_i2	1	p3	(ATG)6	18	44	61
		TRINITY_DN84561_c0_g1_i1	1	p3	(ATG)6	18	44	61
		TRINITY_DN84562_c0_g1_i1	1	p1	(T)10	10	828	837
		TRINITY_DN84540_c0_g1_i1	1	p3	(GAG)5	15	428	442
		TRINITY_DN84514_c0_g1_i1	1	p1	(T)10	10	237	246
		TRINITY_DN52112_c2_g1_i1	1	p2	(AG)23	46	22	67
		TRINITY_DN52125_c1_g1_i2	1	p2	(CT)9	18	424	441
		TRINITY_DN52125_c3_g2_i1	1	p2	(GA)12	24	278	301
		TRINITY_DN52176_c0_g1_i1	1	p1	(G)10	10	224	233
		TRINITY_DN52176_c0_g1_i3	1	p1	(G)12	12	57	68
		TRINITY_DN52131_c0_g1_i4	1	p2	(GT)9	18	271	288
		TRINITY_DN52131_c0_g1_i1	1	p2	(GT)9	18	273	290
		TRINITY_DN52192_c0_g2_i2	1	p1	(A)10	10	1649	1658
		TRINITY_DN52196_c0_g2_i7	1	p2	(TC)6	12	563	574
		TRINITY_DN52190_c1_g1_i2	1	p3	(GAC)5	15	202	216
		TRINITY_DN52116_c3_g1_i1	1	p1	(A)10	10	154	163
		TRINITY_DN70779_c0_g1_i1	1	p1	(T)10	10	1092	1101
		TRINITY_DN70725_c0_g1_i1	1	p1	(A)11	11	233	243
		TRINITY_DN70718_c0_g1_i1	1	p1	(T)10	10	274	283
		TRINITY_DN70718_c0_g1_i2	1	p1	(T)10	10	274	283
		TRINITY_DN70729_c0_g1_i2	1	p1	(T)10	10	319	328
		TRINITY_DN70729_c0_g1_i3	1	p1	(T)10	10	319	328
		TRINITY_DN931_c0_g1_i6	1	p1	(A)10	10	2315	2324
		TRINITY_DN979_c0_g1_i8	1	p2	(CA)8	16	205	220
		TRINITY_DN979_c0_g1_i6	1	p2	(CA)12	24	126	149
		TRINITY_DN979_c0_g1_i7	1	p2	(CA)11	22	126	147
		TRINITY_DN979_c0_g1_i5	1	p2	(CA)11	22	126	147
		TRINITY_DN979_c0_g1_i4	1	p2	(CA)11	22	126	147
		TRINITY_DN979_c0_g1_i9	1	p2	(CA)11	22	126	147
		TRINITY_DN979_c0_g1_i2	1	p2	(CA)8	16	205	220
		TRINITY_DN979_c0_g1_i1	1	p2	(CA)8	16	205	220
		TRINITY_DN909_c0_g2_i1	1	p3	(AAG)5	15	487	501
		TRINITY_DN994_c2_g1_i1	1	p2	(TC)6	12	95	106
		TRINITY_DN953_c0_g1_i4	1	p2	(GA)16	32	502	533
		TRINITY_DN953_c0_g1_i1	1	p2	(GA)16	32	502	533
		TRINITY_DN953_c0_g1_i6	1	p2	(GA)15	30	502	531
		TRINITY_DN953_c1_g1_i3	1	p2	(TC)6	12	78	89
		TRINITY_DN954_c0_g2_i1	1	p3	(ATG)6	18	1203	1220
		TRINITY_DN954_c0_g2_i3	1	p3	(ATG)6	18	1203	1220
		TRINITY_DN921_c0_g1_i11	1	p3	(AAG)5	15	799	813
		TRINITY_DN921_c0_g1_i2	1	p3	(AAG)5	15	778	792
		TRINITY_DN921_c0_g1_i8	1	p3	(AAG)5	15	799	813
		TRINITY_DN921_c0_g1_i4	1	p3	(AAG)5	15	778	792
		TRINITY_DN921_c0_g1_i3	1	p3	(AAG)5	15	799	813
		TRINITY_DN921_c0_g1_i9	1	p3	(AAG)5	15	799	813
		TRINITY_DN921_c0_g1_i7	1	p3	(AAG)5	15	778	792
		TRINITY_DN921_c0_g1_i6	1	p3	(AAG)5	15	778	792
		TRINITY_DN921_c0_g1_i10	1	p3	(AAG)5	15	778	792
		TRINITY_DN921_c0_g1_i5	1	p3	(AAG)5	15	778	792
		TRINITY_DN921_c0_g1_i1	1	p3	(AAG)5	15	799	813
		TRINITY_DN937_c4_g1_i1	1	p3	(TCG)5	15	94	108
		TRINITY_DN918_c0_g1_i5	1	p3	(AGG)5	15	1202	1216
		TRINITY_DN918_c0_g1_i2	1	p3	(GAG)5	15	1198	1212
		TRINITY_DN918_c1_g2_i2	1	p2	(GT)6	12	389	400
		TRINITY_DN918_c3_g1_i1	1	p1	(A)10	10	197	206
		TRINITY_DN995_c0_g1_i9	1	p2	(GA)12	24	384	407
		TRINITY_DN995_c0_g1_i4	1	p3	(TAG)5	15	669	683
		TRINITY_DN995_c0_g1_i5	1	c	(TC)8tgccccgggccgcggactt(TC)8	51	481	531
		TRINITY_DN995_c0_g1_i3	1	c*	(TAG)5tcggctc(GTG)6gaccggtggcgctgcgaatccgagggagtagaaaggcgctcctctcctctcctccgtttcgcgagtc(AG)6(GAGAGG)5*	144	669	812
		TRINITY_DN995_c0_g1_i1	1	c	(TAG)5tcggctc(GTG)6	40	669	708
		TRINITY_DN995_c0_g1_i11	1	c	(GA)12ggggtgcactagggcagcactagacgttggttgctttggagtcgtgtgcatcaccctcctttctctcnnnnnnnnn(CT)7gccccgggccgcggactt(TC)8	148	384	531
		TRINITY_DN995_c0_g1_i11	2	p3	(TAG)5	15	669	683
		TRINITY_DN916_c0_g1_i3	1	p3	(CGC)5	15	3	17
		TRINITY_DN916_c0_g1_i2	1	p3	(CCG)5	15	2	16
		TRINITY_DN916_c0_g2_i1	1	p3	(GCC)6	18	176	193
		TRINITY_DN911_c0_g1_i1	1	c	(CACG)6ca(GCAC)6	50	90	139
		TRINITY_DN911_c0_g2_i5	1	p4	(GCAC)5	20	42	61
		TRINITY_DN911_c0_g2_i3	1	p4	(GCAC)5	20	42	61
		TRINITY_DN911_c0_g2_i1	1	p4	(GCAC)5	20	42	61
		TRINITY_DN907_c0_g1_i7	1	p1	(A)10	10	1873	1882
		TRINITY_DN907_c0_g1_i8	1	p1	(A)10	10	1875	1884
		TRINITY_DN907_c0_g1_i2	1	p1	(A)10	10	2044	2053
		TRINITY_DN946_c0_g1_i14	1	p3	(TAG)5	15	2470	2484
		TRINITY_DN965_c0_g1_i4	1	p3	(CGC)7	21	141	161
		TRINITY_DN965_c0_g1_i5	1	p3	(CGC)7	21	141	161
		TRINITY_DN965_c0_g1_i1	1	p3	(CGC)7	21	141	161
		TRINITY_DN965_c0_g1_i3	1	p3	(CGC)5	15	141	155
		TRINITY_DN965_c0_g1_i6	1	p3	(CGC)7	21	141	161
		TRINITY_DN965_c0_g1_i2	1	p3	(CGC)7	21	141	161
		TRINITY_DN965_c1_g1_i1	1	p3	(CCG)5	15	208	222
		TRINITY_DN965_c2_g1_i2	1	p3	(CCG)6	18	226	243
		TRINITY_DN923_c0_g1_i1	1	p2	(AG)8	16	150	165
		TRINITY_DN923_c0_g2_i4	1	p3	(TGC)6	18	513	530
		TRINITY_DN923_c0_g2_i5	1	p3	(TCT)5	15	635	649
		TRINITY_DN923_c0_g2_i3	1	p3	(TCT)5	15	635	649
		TRINITY_DN923_c0_g2_i2	1	p3	(TGC)6	18	513	530
		TRINITY_DN923_c0_g2_i1	1	p3	(TCT)5	15	635	649
		TRINITY_DN904_c1_g1_i8	1	p2	(GT)9	18	840	857
		TRINITY_DN904_c1_g1_i3	1	p3	(GCC)5	15	497	511
		TRINITY_DN904_c1_g1_i3	2	p2	(GT)9	18	852	869
		TRINITY_DN904_c1_g1_i1	1	p3	(CCG)7	21	446	466
		TRINITY_DN904_c1_g1_i9	1	p2	(GT)9	18	840	857
		TRINITY_DN904_c1_g1_i2	1	p3	(GCC)5	15	497	511
		TRINITY_DN904_c1_g1_i2	2	p2	(GT)9	18	852	869
		TRINITY_DN904_c1_g1_i7	1	p2	(GT)9	18	840	857
		TRINITY_DN904_c1_g1_i4	1	p3	(GCC)5	15	497	511
		TRINITY_DN904_c1_g1_i4	2	p2	(GT)9	18	852	869
		TRINITY_DN975_c0_g1_i6	1	p3	(GCT)6	18	869	886
		TRINITY_DN975_c0_g1_i2	1	p3	(TAC)5	15	423	437
		TRINITY_DN975_c0_g1_i4	1	p3	(GGC)5	15	181	195
		TRINITY_DN975_c0_g1_i3	1	p3	(TCT)5	15	448	462
		TRINITY_DN975_c0_g1_i3	2	p3	(GGT)5	15	841	855
		TRINITY_DN975_c0_g1_i5	1	p3	(GGC)5	15	181	195
		TRINITY_DN975_c0_g1_i7	1	p3	(TCT)5	15	467	481
		TRINITY_DN975_c0_g1_i7	2	p3	(GGT)5	15	860	874
		TRINITY_DN948_c0_g1_i9	1	p3	(CGG)6	18	76	93
		TRINITY_DN984_c0_g1_i5	1	p3	(AGA)5	15	781	795
		TRINITY_DN984_c0_g1_i3	1	p3	(AGA)5	15	781	795
		TRINITY_DN984_c0_g1_i7	1	p3	(AGA)5	15	781	795
		TRINITY_DN984_c0_g1_i4	1	p3	(AGA)5	15	781	795
		TRINITY_DN951_c0_g1_i2	1	p3	(TGG)6	18	228	245
		TRINITY_DN963_c0_g1_i3	1	p3	(CGA)8	24	41	64
		TRINITY_DN963_c0_g1_i1	1	p3	(CGA)8	24	41	64
		TRINITY_DN963_c0_g1_i4	1	p3	(CGA)8	24	41	64
		TRINITY_DN987_c0_g2_i8	1	p3	(CAG)5	15	847	861
		TRINITY_DN987_c0_g2_i7	1	p3	(CAG)5	15	799	813
		TRINITY_DN987_c0_g2_i4	1	p3	(CAG)5	15	854	868
		TRINITY_DN987_c0_g2_i5	1	p3	(CAG)5	15	839	853
		TRINITY_DN987_c0_g2_i2	1	p3	(CAG)5	15	854	868
		TRINITY_DN910_c1_g1_i2	1	p3	(GGA)5	15	252	266
		TRINITY_DN980_c0_g1_i8	1	p1	(T)10	10	1720	1729
		TRINITY_DN980_c0_g1_i4	1	p1	(T)10	10	1717	1726
		TRINITY_DN980_c0_g1_i6	1	p1	(T)10	10	1723	1732
		TRINITY_DN980_c0_g1_i9	1	p1	(T)10	10	1726	1735
		TRINITY_DN932_c1_g1_i3	1	p3	(GCG)5	15	72	86
		TRINITY_DN932_c1_g1_i2	1	p3	(GCG)5	15	521	535
		TRINITY_DN967_c0_g1_i2	1	p3	(CTC)6	18	588	605
		TRINITY_DN967_c0_g1_i1	1	p3	(CTC)6	18	588	605
		TRINITY_DN926_c0_g1_i9	1	p2	(TA)7	14	1165	1178
		TRINITY_DN926_c0_g1_i1	1	p2	(TA)7	14	1170	1183
		TRINITY_DN926_c0_g1_i5	1	p2	(TA)7	14	1170	1183
		TRINITY_DN926_c0_g1_i3	1	p2	(TA)7	14	941	954
		TRINITY_DN926_c0_g1_i8	1	p2	(TA)7	14	941	954
		TRINITY_DN900_c0_g1_i4	1	p3	(GCA)6	18	1317	1334
		TRINITY_DN900_c0_g1_i3	1	p3	(CCG)5	15	1052	1066
		TRINITY_DN900_c0_g1_i3	2	p3	(GCA)6	18	1320	1337
		TRINITY_DN900_c0_g1_i2	1	p3	(CCG)5	15	1052	1066
		TRINITY_DN999_c0_g1_i6	1	p2	(TG)6	12	436	447
		TRINITY_DN999_c0_g2_i1	1	p2	(GA)10	20	245	264
		TRINITY_DN999_c0_g2_i2	1	p2	(GA)10	20	245	264
		TRINITY_DN988_c0_g1_i5	1	p1	(T)10	10	1575	1584
		TRINITY_DN988_c0_g1_i2	1	p1	(T)10	10	1575	1584
		TRINITY_DN988_c0_g1_i1	1	p1	(T)10	10	1575	1584
		TRINITY_DN988_c0_g1_i4	1	p1	(T)10	10	1575	1584
		TRINITY_DN949_c0_g1_i7	1	p3	(GCC)5	15	189	203
		TRINITY_DN949_c0_g1_i2	1	p3	(CCG)5	15	106	120
		TRINITY_DN949_c0_g1_i4	1	p3	(CCG)5	15	106	120
		TRINITY_DN949_c0_g1_i5	1	p3	(GCC)5	15	189	203
		TRINITY_DN949_c0_g1_i3	1	p3	(CCG)5	15	106	120
		TRINITY_DN949_c0_g1_i8	1	p3	(GCC)5	15	189	203
		TRINITY_DN939_c0_g1_i2	1	p3	(GGC)5	15	557	571
		TRINITY_DN939_c0_g1_i5	1	p3	(GGC)5	15	527	541
		TRINITY_DN939_c0_g1_i9	1	p3	(GGC)5	15	527	541
		TRINITY_DN939_c0_g1_i4	1	p3	(GGC)5	15	784	798
		TRINITY_DN944_c0_g1_i2	1	p1	(T)10	10	3216	3225
		TRINITY_DN917_c0_g2_i7	1	p4	(AATC)6	24	2130	2153
		TRINITY_DN917_c0_g2_i1	1	p4	(AATC)6	24	2130	2153
		TRINITY_DN917_c2_g1_i1	1	p4	(ATCA)6	24	235	258
		TRINITY_DN986_c0_g1_i4	1	p2	(TG)9	18	226	243
		TRINITY_DN986_c0_g1_i2	1	p2	(TG)9	18	193	210
		TRINITY_DN943_c0_g1_i1	1	p2	(AG)9	18	59	76
		TRINITY_DN933_c2_g1_i3	1	p3	(CCA)5	15	117	131
		TRINITY_DN998_c0_g1_i11	1	p2	(AG)6	12	220	231
		TRINITY_DN998_c0_g1_i11	2	p3	(GAT)5	15	1309	1323
		TRINITY_DN998_c0_g1_i3	1	p3	(GAT)5	15	1144	1158
		TRINITY_DN998_c0_g1_i1	1	p3	(GGA)5	15	289	303
		TRINITY_DN998_c0_g1_i12	1	p3	(GGA)5	15	289	303
		TRINITY_DN998_c0_g1_i12	2	p3	(GAT)5	15	1310	1324
		TRINITY_DN998_c0_g1_i12	3	p3	(TAT)5	15	1535	1549
		TRINITY_DN998_c0_g1_i8	1	p2	(AG)6	12	220	231
		TRINITY_DN998_c0_g1_i8	2	p3	(GAT)5	15	1309	1323
		TRINITY_DN998_c0_g1_i8	3	p3	(TAT)5	15	1534	1548
		TRINITY_DN998_c0_g1_i9	1	p3	(GGA)5	15	289	303
		TRINITY_DN998_c0_g1_i6	1	p2	(AG)6	12	220	231
		TRINITY_DN998_c0_g1_i4	1	p2	(AG)6	12	220	231
		TRINITY_DN998_c0_g1_i2	1	p3	(GGA)5	15	289	303
		TRINITY_DN998_c0_g1_i2	2	p3	(GAT)5	15	1310	1324
		TRINITY_DN903_c0_g1_i1	1	p3	(GAA)7	21	28	48
		TRINITY_DN903_c0_g1_i2	1	p3	(GAA)7	21	28	48
		TRINITY_DN977_c0_g1_i8	1	p3	(CGC)6	18	235	252
		TRINITY_DN977_c0_g1_i3	1	p3	(CGC)5	15	238	252
		TRINITY_DN977_c0_g1_i2	1	p3	(CGC)6	18	229	246
		TRINITY_DN977_c0_g1_i11	1	p3	(CGC)5	15	238	252
		TRINITY_DN977_c0_g1_i4	1	p3	(CGC)5	15	238	252
		TRINITY_DN977_c0_g1_i9	1	p3	(CGC)6	18	235	252
		TRINITY_DN977_c0_g1_i1	1	p3	(CGC)6	18	238	255
		TRINITY_DN968_c1_g1_i1	1	p2	(AT)6	12	1887	1898
		TRINITY_DN968_c1_g1_i4	1	p2	(AT)6	12	594	605
		TRINITY_DN968_c1_g1_i7	1	p2	(AT)6	12	1382	1393
		TRINITY_DN968_c1_g1_i6	1	p2	(AT)6	12	1887	1898
		TRINITY_DN990_c0_g1_i1	1	p3	(GAT)5	15	2	16
		TRINITY_DN990_c0_g1_i2	1	p3	(GAT)5	15	2	16
		TRINITY_DN942_c0_g2_i1	1	p3	(AAG)5	15	1241	1255
		TRINITY_DN913_c0_g1_i6	1	p3	(CGA)5	15	960	974
		TRINITY_DN913_c0_g1_i2	1	p3	(CGA)5	15	960	974
		TRINITY_DN901_c0_g1_i9	1	p1	(A)11	11	58	68
		TRINITY_DN901_c0_g1_i9	2	p3	(GCA)5	15	305	319
		TRINITY_DN901_c0_g1_i9	3	p3	(TGA)5	15	851	865
		TRINITY_DN901_c0_g1_i10	1	p1	(A)11	11	58	68
		TRINITY_DN901_c0_g1_i10	2	p3	(GCA)5	15	305	319
		TRINITY_DN901_c0_g1_i10	3	p3	(TGA)5	15	851	865
		TRINITY_DN901_c0_g1_i3	1	p3	(GCA)6	18	314	331
		TRINITY_DN901_c0_g1_i3	2	p3	(TGA)5	15	873	887
		TRINITY_DN901_c0_g1_i2	1	p1	(A)11	11	58	68
		TRINITY_DN901_c0_g1_i2	2	p3	(GCA)5	15	305	319
		TRINITY_DN901_c0_g1_i4	1	p3	(GCA)7	21	286	306
		TRINITY_DN901_c0_g1_i4	2	p3	(TGA)5	15	860	874
		TRINITY_DN901_c0_g1_i8	1	p3	(GCA)7	21	286	306
		TRINITY_DN901_c0_g1_i8	2	p3	(TGA)5	15	832	846
		TRINITY_DN901_c0_g1_i11	1	p1	(A)11	11	58	68
		TRINITY_DN901_c0_g1_i11	2	p3	(GCA)5	15	305	319
		TRINITY_DN901_c0_g1_i11	3	p3	(TGA)5	15	879	893
		TRINITY_DN901_c0_g1_i7	1	p3	(GCA)7	21	286	306
		TRINITY_DN901_c0_g1_i7	2	p3	(TGA)5	15	832	846
		TRINITY_DN970_c0_g1_i3	1	p3	(CGC)6	18	157	174
		TRINITY_DN970_c0_g1_i1	1	p3	(CGC)6	18	157	174
		TRINITY_DN970_c0_g1_i1	2	p4	(TGTC)5	20	4147	4166
		TRINITY_DN970_c0_g1_i2	1	p3	(CGC)6	18	157	174
		TRINITY_DN970_c0_g1_i2	2	p4	(TGTC)5	20	4147	4166
		TRINITY_DN936_c0_g1_i10	1	c	(GAC)5(GCT)5	30	613	642
		TRINITY_DN936_c0_g1_i13	1	c	(TC)8taaaagaaaat(A)10	37	94	130
		TRINITY_DN936_c0_g1_i13	2	c	(GAC)5(GCT)5	30	613	642
		TRINITY_DN936_c0_g1_i13	3	p2	(AG)10	20	2967	2986
		TRINITY_DN936_c0_g1_i11	1	c	(GAC)5(GCT)5	30	613	642
		TRINITY_DN936_c0_g1_i11	2	p4	(AGGA)5	20	2980	2999
		TRINITY_DN936_c0_g1_i8	1	p4	(AGGA)5	20	2965	2984
		TRINITY_DN936_c0_g1_i2	1	c	(TC)8taaaagaaaat(A)10	37	94	130
		TRINITY_DN936_c0_g1_i12	1	c	(GAC)5(GCT)5	30	613	642
		TRINITY_DN936_c0_g1_i12	2	p2	(AG)10	20	3003	3022
		TRINITY_DN936_c0_g1_i6	1	c	(TC)8taaaagaaaat(A)10	37	94	130
		TRINITY_DN936_c0_g1_i6	2	p2	(AG)10	20	2952	2971
		TRINITY_DN936_c0_g1_i3	1	c	(GAC)5(GCT)5	30	613	642
		TRINITY_DN936_c0_g1_i3	2	p4	(AGGA)5	20	3016	3035
		TRINITY_DN936_c0_g1_i14	1	p4	(AGGA)5	20	3025	3044
		TRINITY_DN936_c0_g1_i4	1	c	(GAC)5(GCT)5	30	613	642
		TRINITY_DN74163_c0_g1_i1	1	p2	(AC)20	40	1267	1306
		TRINITY_DN74189_c0_g1_i5	1	p3	(CCA)6	18	1241	1258
		TRINITY_DN74189_c0_g1_i1	1	p3	(CCA)5	15	935	949
		TRINITY_DN74189_c0_g1_i1	2	p3	(CCA)6	18	1238	1255
		TRINITY_DN74189_c0_g1_i4	1	p3	(CCA)6	18	1238	1255
		TRINITY_DN74189_c0_g1_i2	1	p3	(CCA)5	15	859	873
		TRINITY_DN74189_c0_g1_i2	2	p3	(CCA)6	18	1162	1179
		TRINITY_DN74108_c0_g1_i1	1	p3	(AAT)5	15	258	272
		TRINITY_DN74109_c0_g1_i1	1	p4	(TTTC)8	32	1015	1046
		TRINITY_DN74119_c2_g1_i1	1	p3	(GAG)5	15	307	321
		TRINITY_DN34753_c0_g1_i4	1	p3	(ACG)6	18	144	161
		TRINITY_DN34753_c0_g1_i3	1	p3	(ACG)6	18	144	161
		TRINITY_DN34753_c0_g1_i2	1	c	(AG)8aagagagggaaaga(AG)6	42	43	84
		TRINITY_DN34753_c0_g1_i2	2	p3	(ACG)5	15	261	275
		TRINITY_DN34753_c0_g1_i1	1	p3	(ACG)6	18	144	161
		TRINITY_DN34754_c0_g1_i1	1	p1	(A)10	10	734	743
		TRINITY_DN34724_c0_g1_i1	1	p3	(CCA)5	15	159	173
		TRINITY_DN34724_c0_g1_i3	1	p3	(CAT)5	15	179	193
		TRINITY_DN34724_c0_g1_i2	1	p3	(CAT)5	15	179	193
		TRINITY_DN34724_c0_g1_i2	2	p2	(GA)11	22	461	482
		TRINITY_DN34784_c0_g1_i2	1	p1	(C)11	11	176	186
		TRINITY_DN34788_c2_g1_i1	1	p1	(T)10	10	345	354
		TRINITY_DN34735_c0_g1_i1	1	p2	(AG)7	14	126	139
		TRINITY_DN34757_c0_g1_i1	1	p3	(GAG)5	15	273	287
		TRINITY_DN34757_c0_g1_i2	1	p2	(GC)6	12	175	186
		TRINITY_DN34727_c0_g1_i2	1	p3	(GAC)5	15	158	172
		TRINITY_DN34743_c0_g1_i5	1	p3	(GAC)5	15	1797	1811
		TRINITY_DN34743_c0_g1_i7	1	p3	(GAC)5	15	1797	1811
		TRINITY_DN34743_c0_g1_i1	1	p3	(GAC)5	15	210	224
		TRINITY_DN34743_c0_g1_i8	1	p3	(GAC)5	15	1797	1811
		TRINITY_DN34743_c0_g1_i2	1	p3	(GAC)5	15	1797	1811
		TRINITY_DN34743_c0_g1_i4	1	p3	(GAC)5	15	1797	1811
		TRINITY_DN34719_c0_g1_i1	1	p3	(CCT)5	15	450	464
		TRINITY_DN34799_c0_g1_i3	1	p2	(GT)23	46	765	810
		TRINITY_DN34799_c0_g1_i4	1	p2	(GT)23	46	7	52
		TRINITY_DN34789_c0_g1_i1	1	p2	(GA)7	14	96	109
		TRINITY_DN34760_c0_g1_i4	1	p1	(T)10	10	161	170
		TRINITY_DN12301_c0_g1_i2	1	p3	(GAT)5	15	2639	2653
		TRINITY_DN12301_c0_g1_i1	1	p3	(GAT)5	15	182	196
		TRINITY_DN12301_c0_g1_i7	1	p3	(GAT)5	15	2657	2671
		TRINITY_DN12301_c0_g1_i3	1	p3	(GAT)5	15	2639	2653
		TRINITY_DN12301_c0_g1_i11	1	p3	(GAT)5	15	464	478
		TRINITY_DN12301_c0_g1_i12	1	p3	(GAT)5	15	2657	2671
		TRINITY_DN12301_c0_g1_i14	1	p3	(GAT)5	15	2639	2653
		TRINITY_DN12320_c0_g1_i7	1	c	(A)10gaat(TTG)12	50	1108	1157
		TRINITY_DN12320_c0_g1_i5	1	c	(A)10gaat(TTG)8	38	804	841
		TRINITY_DN12330_c0_g2_i1	1	p3	(AAG)5	15	374	388
		TRINITY_DN12390_c0_g1_i1	1	p3	(CTC)5	15	208	222
		TRINITY_DN12390_c0_g1_i2	1	p3	(CTC)5	15	208	222
		TRINITY_DN12390_c0_g1_i4	1	p3	(CTC)5	15	208	222
		TRINITY_DN12390_c0_g1_i3	1	p3	(CTC)5	15	208	222
		TRINITY_DN12327_c1_g1_i5	1	p2	(GA)6	12	163	174
		TRINITY_DN12327_c1_g1_i1	1	p2	(GA)6	12	163	174
		TRINITY_DN12361_c0_g1_i5	1	p1	(T)10	10	2352	2361
		TRINITY_DN12361_c0_g1_i6	1	p1	(T)10	10	2371	2380
		TRINITY_DN12361_c0_g1_i2	1	p1	(T)10	10	2371	2380
		TRINITY_DN12371_c0_g1_i3	1	p3	(CGC)5	15	348	362
		TRINITY_DN12371_c0_g1_i3	2	p3	(CTT)5	15	1222	1236
		TRINITY_DN12371_c0_g1_i2	1	p3	(CGC)5	15	348	362
		TRINITY_DN12371_c0_g1_i2	2	p3	(CTT)6	18	1099	1116
		TRINITY_DN12371_c0_g1_i1	1	p3	(CGC)5	15	348	362
		TRINITY_DN12371_c0_g1_i1	2	p3	(CTT)5	15	1096	1110
		TRINITY_DN12371_c0_g1_i4	1	p3	(CGC)5	15	348	362
		TRINITY_DN12371_c0_g1_i4	2	p3	(CTT)5	15	1096	1110
		TRINITY_DN12300_c0_g1_i3	1	c	(CT)8catcctg(CT)17	57	538	594
		TRINITY_DN12300_c0_g1_i6	1	c	(CT)8catcctg(CT)17	57	538	594
		TRINITY_DN12342_c0_g1_i3	1	p3	(GCC)5	15	222	236
		TRINITY_DN12342_c0_g1_i2	1	p3	(GCC)5	15	222	236
		TRINITY_DN12342_c0_g1_i5	1	p3	(GCC)5	15	222	236
		TRINITY_DN12326_c0_g1_i1	1	p2	(TA)8	16	5070	5085
		TRINITY_DN12340_c0_g1_i13	1	p3	(GCT)5	15	1617	1631
		TRINITY_DN12340_c3_g1_i2	1	p3	(AGC)5	15	335	349
		TRINITY_DN12306_c0_g1_i6	1	p3	(CTC)7	21	193	213
		TRINITY_DN12306_c0_g1_i4	1	p3	(CTC)7	21	193	213
		TRINITY_DN12306_c0_g1_i3	1	p3	(CTC)7	21	193	213
		TRINITY_DN12306_c0_g1_i2	1	p3	(CCT)5	15	201	215
		TRINITY_DN12306_c0_g1_i1	1	p3	(CTC)7	21	193	213
		TRINITY_DN12355_c0_g1_i1	1	c	(CGC)5c(GGA)6	34	30	63
		TRINITY_DN12355_c0_g1_i2	1	c	(CGC)5c(GGA)6	34	30	63
		TRINITY_DN12387_c0_g1_i1	1	p3	(CGC)5	15	74	88
		TRINITY_DN12387_c0_g1_i5	1	p3	(CGC)5	15	74	88
		TRINITY_DN12344_c0_g1_i1	1	p3	(CCG)7	21	188	208
		TRINITY_DN12348_c0_g2_i3	1	p2	(CT)7	14	56	69
		TRINITY_DN12348_c0_g2_i8	1	p2	(CT)7	14	56	69
		TRINITY_DN12329_c0_g2_i4	1	p4	(CTTT)11	44	1498	1541
		TRINITY_DN12329_c0_g3_i1	1	p4	(TCTT)6	24	812	835
		TRINITY_DN12357_c0_g1_i3	1	p3	(CAC)7	21	366	386
		TRINITY_DN12357_c0_g1_i4	1	p3	(CAC)5	15	366	380
		TRINITY_DN12349_c0_g1_i2	1	p3	(GAG)5	15	243	257
		TRINITY_DN12349_c0_g1_i2	2	p3	(CAG)5	15	444	458
		TRINITY_DN12349_c0_g1_i8	1	p3	(GAG)5	15	243	257
		TRINITY_DN12349_c0_g1_i8	2	p3	(CAG)5	15	444	458
		TRINITY_DN12349_c0_g1_i10	1	p3	(GAG)6	18	243	260
		TRINITY_DN12349_c0_g1_i10	2	p3	(CAG)5	15	447	461
		TRINITY_DN12349_c0_g1_i5	1	p3	(GAG)5	15	243	257
		TRINITY_DN12349_c0_g1_i5	2	p3	(CAG)5	15	444	458
		TRINITY_DN12325_c0_g1_i4	1	p3	(CTG)8	24	7342	7365
		TRINITY_DN12325_c0_g1_i6	1	p3	(CTG)8	24	7321	7344
		TRINITY_DN12324_c0_g1_i3	1	p2	(GC)6	12	219	230
		TRINITY_DN12324_c0_g1_i2	1	p2	(GC)6	12	219	230
		TRINITY_DN12324_c0_g1_i5	1	p2	(GC)6	12	181	192
		TRINITY_DN12341_c0_g3_i4	1	p3	(TGC)5	15	317	331
		TRINITY_DN12305_c0_g1_i1	1	p1	(A)11	11	1020	1030
		TRINITY_DN12358_c0_g1_i6	1	p2	(AC)7	14	16	29
		TRINITY_DN12358_c0_g1_i3	1	p1	(A)10	10	607	616
		TRINITY_DN12358_c0_g1_i7	1	p2	(AC)7	14	16	29
		TRINITY_DN12358_c0_g1_i5	1	p1	(A)10	10	572	581
		TRINITY_DN12318_c0_g1_i1	1	p2	(CG)6	12	264	275
		TRINITY_DN12318_c0_g1_i2	1	p2	(CG)6	12	264	275
		TRINITY_DN12318_c0_g1_i4	1	p2	(CG)6	12	264	275
		TRINITY_DN12319_c0_g1_i4	1	p2	(TG)6	12	285	296
		TRINITY_DN12319_c0_g1_i5	1	p2	(GT)6	12	283	294
		TRINITY_DN12319_c0_g1_i2	1	p2	(GT)6	12	283	294
		TRINITY_DN12311_c0_g1_i5	1	p3	(CTC)6	18	97	114
		TRINITY_DN12393_c0_g1_i2	1	p3	(CTT)5	15	680	694
		TRINITY_DN12397_c0_g1_i18	1	c	(TG)9tatat(AC)12	47	17	63
		TRINITY_DN12397_c0_g1_i7	1	p1	(T)10	10	290	299
		TRINITY_DN12397_c0_g1_i19	1	p2	(CA)7	14	51	64
		TRINITY_DN12397_c0_g1_i19	2	p1	(T)10	10	290	299
		TRINITY_DN12397_c0_g1_i8	1	c	(TG)9tatat(AC)12	47	17	63
		TRINITY_DN12397_c0_g1_i8	2	p1	(T)10	10	290	299
		TRINITY_DN12397_c0_g1_i13	1	p2	(AC)12	24	40	63
		TRINITY_DN12397_c0_g1_i14	1	p1	(T)10	10	290	299
		TRINITY_DN12397_c0_g1_i16	1	c	(TG)9tatat(AC)12	47	17	63
		TRINITY_DN12397_c0_g1_i16	2	p1	(T)10	10	290	299
		TRINITY_DN12397_c0_g1_i3	1	p2	(AC)12	24	40	63
		TRINITY_DN12397_c0_g1_i3	2	p1	(T)10	10	290	299
		TRINITY_DN12397_c0_g1_i5	1	c	(TG)9tatat(AC)12	47	17	63
		TRINITY_DN12321_c0_g1_i3	1	c	(CA)16(GA)15	62	14	75
		TRINITY_DN12321_c0_g1_i1	1	p2	(AG)11	22	55	76
		TRINITY_DN12379_c1_g2_i2	1	p1	(A)10	10	826	835
		TRINITY_DN12379_c1_g2_i1	1	p1	(A)10	10	362	371
		TRINITY_DN12379_c1_g2_i4	1	p1	(A)10	10	670	679
		TRINITY_DN12375_c0_g1_i2	1	p3	(CGC)5	15	2192	2206
		TRINITY_DN12399_c0_g1_i1	1	p1	(A)11	11	799	809
		TRINITY_DN12328_c0_g2_i1	1	p3	(GAC)5	15	455	469
		TRINITY_DN12396_c0_g1_i1	1	p3	(CCT)6	18	217	234
		TRINITY_DN12396_c0_g1_i5	1	p3	(CCT)6	18	217	234
		TRINITY_DN12396_c0_g1_i4	1	p3	(CCT)6	18	217	234
		TRINITY_DN12396_c0_g1_i3	1	p3	(CCT)6	18	217	234
		TRINITY_DN12347_c0_g2_i2	1	p3	(GCC)6	18	789	806
		TRINITY_DN12347_c0_g2_i4	1	c	(CGC)5cgacaacgtcttctcccgcttcctggccgaccaccagatccgagacaccaa(GCC)6	84	718	801
		TRINITY_DN12347_c0_g2_i1	1	p2	(TC)6	12	212	223
		TRINITY_DN12347_c0_g2_i1	2	p3	(GCC)6	18	764	781
		TRINITY_DN12347_c0_g2_i3	1	c	(GCC)6cgtcgcccccggggcccacttccctgatgactccgccatggcatc(GCA)6	81	783	863
		TRINITY_DN12370_c0_g1_i2	1	p3	(GTC)6	18	163	180
		TRINITY_DN12370_c0_g1_i4	1	p1	(A)11	11	9	19
		TRINITY_DN33406_c0_g1_i2	1	p1	(T)11	11	377	387
		TRINITY_DN33406_c0_g1_i1	1	p1	(T)11	11	377	387
		TRINITY_DN33478_c0_g1_i2	1	p3	(CCT)6	18	545	562
		TRINITY_DN33490_c0_g3_i1	1	p2	(GA)9	18	258	275
		TRINITY_DN33490_c0_g3_i3	1	p2	(GA)9	18	258	275
		TRINITY_DN33486_c0_g1_i3	1	p3	(CTC)7	21	392	412
		TRINITY_DN33486_c1_g1_i3	1	p4	(GCTC)5	20	48	67
		TRINITY_DN33486_c1_g1_i5	1	p4	(GCTC)5	20	48	67
		TRINITY_DN33486_c1_g1_i5	2	p3	(CCT)6	18	336	353
		TRINITY_DN33414_c0_g4_i1	1	p1	(A)10	10	156	165
		TRINITY_DN33462_c0_g2_i1	1	p3	(AGC)5	15	229	243
		TRINITY_DN33419_c0_g1_i1	1	p1	(T)10	10	733	742
		TRINITY_DN33401_c0_g1_i2	1	p3	(GCG)5	15	137	151
		TRINITY_DN33483_c1_g1_i3	1	p2	(TC)7	14	682	695
		TRINITY_DN33483_c1_g1_i1	1	p2	(TC)7	14	682	695
		TRINITY_DN33447_c0_g1_i1	1	p1	(A)12	12	494	505
		TRINITY_DN33447_c0_g1_i3	1	p1	(A)12	12	545	556
		TRINITY_DN33400_c0_g1_i1	1	p4	(GCTT)5	20	811	830
		TRINITY_DN33400_c0_g3_i1	1	p4	(TGCT)5	20	146	165
		TRINITY_DN33400_c0_g3_i1	2	p4	(GCTT)5	20	435	454
		TRINITY_DN33487_c1_g1_i4	1	p1	(T)10	10	812	821
		TRINITY_DN33488_c0_g1_i10	1	p2	(GT)7	14	206	219
		TRINITY_DN33403_c0_g1_i2	1	p3	(GCG)6	18	148	165
		TRINITY_DN33422_c0_g1_i3	1	p3	(GAT)10	30	16	45
		TRINITY_DN33422_c0_g1_i2	1	p3	(GAT)15	45	1	45
		TRINITY_DN33454_c0_g2_i1	1	p3	(CGC)5	15	334	348
		TRINITY_DN41388_c2_g3_i1	1	p1	(T)10	10	136	145
		TRINITY_DN41365_c0_g1_i2	1	p3	(TTC)5	15	90	104
		TRINITY_DN41365_c0_g1_i4	1	p3	(CTC)5	15	104	118
		TRINITY_DN41301_c0_g1_i2	1	p3	(GCA)6	18	672	689
		TRINITY_DN41379_c0_g1_i2	1	p3	(GCT)5	15	1599	1613
		TRINITY_DN41379_c0_g1_i4	1	p3	(TGC)6	18	1547	1564
		TRINITY_DN41329_c1_g1_i2	1	p3	(CGA)5	15	580	594
		TRINITY_DN41329_c1_g1_i3	1	p3	(CGA)5	15	1521	1535
		TRINITY_DN41321_c0_g1_i2	1	p3	(CAC)5	15	972	986
		TRINITY_DN41307_c0_g2_i1	1	p3	(AGC)5	15	45	59
		TRINITY_DN41307_c0_g2_i2	1	p3	(AGC)5	15	45	59
		TRINITY_DN41397_c0_g1_i2	1	p3	(GAG)8	24	356	379
		TRINITY_DN41376_c0_g2_i1	1	p1	(T)10	10	271	280
		TRINITY_DN41376_c2_g1_i2	1	p2	(CT)8	16	858	873
		TRINITY_DN41376_c2_g1_i6	1	p2	(CT)8	16	858	873
		TRINITY_DN41376_c2_g1_i8	1	p2	(CT)8	16	858	873
		TRINITY_DN41361_c0_g2_i3	1	p3	(CCT)5	15	809	823
		TRINITY_DN41338_c0_g1_i3	1	p3	(GGC)6	18	108	125
		TRINITY_DN41338_c0_g1_i4	1	p3	(GGC)6	18	1467	1484
		TRINITY_DN41383_c0_g1_i4	1	p2	(CT)23	46	1308	1353
		TRINITY_DN41336_c1_g1_i1	1	p3	(GAG)6	18	1228	1245
		TRINITY_DN41336_c1_g1_i2	1	p3	(GAG)6	18	1477	1494
		TRINITY_DN41350_c0_g3_i1	1	p2	(TG)7	14	826	839
		TRINITY_DN41311_c0_g1_i3	1	p2	(TC)8	16	34	49
		TRINITY_DN41311_c1_g1_i1	1	c	(CT)10ccctctctctctatctctatcta(TC)17	77	156	232
		TRINITY_DN51024_c0_g1_i8	1	c	(CCT)5ccatctgccccccttcctcgcgaccgcttctctcgcggcctccac(CT)9	78	180	257
		TRINITY_DN51024_c0_g1_i3	1	c	(CCT)5ccatctgccccccttcctcgcgaccgcttctctcgcggcctccac(CT)9	78	180	257
		TRINITY_DN51062_c0_g1_i1	1	p2	(TC)7	14	300	313
		TRINITY_DN51036_c0_g1_i1	1	p2	(TA)6	12	1239	1250
		TRINITY_DN51092_c2_g1_i1	1	p2	(TC)6	12	902	913
		TRINITY_DN51013_c0_g1_i2	1	c	(TGA)5tgccaatggcaacaatcctcaaggtgctggtggcaacaatgccaatgtcaacaatccacacggagctgaa(GAT)6agtgatgatgatgaggatgatgatgataacgataaggatgatggtgatgaca(ATG)6	173	886	1058
		TRINITY_DN51004_c0_g1_i1	1	p3	(CGC)5	15	269	283
		TRINITY_DN51010_c0_g1_i2	1	p3	(GCT)5	15	142	156
		TRINITY_DN11942_c0_g1_i1	1	p2	(TG)7	14	223	236
		TRINITY_DN11996_c0_g1_i2	1	p1	(A)10	10	1993	2002
		TRINITY_DN11996_c0_g1_i10	1	p1	(A)10	10	1992	2001
		TRINITY_DN11996_c0_g1_i7	1	p1	(A)10	10	1975	1984
		TRINITY_DN11996_c0_g1_i11	1	p1	(A)10	10	1974	1983
		TRINITY_DN11996_c0_g1_i8	1	p1	(A)10	10	1974	1983
		TRINITY_DN11996_c0_g1_i9	1	p3	(GGC)5	15	75	89
		TRINITY_DN11996_c0_g1_i9	2	p1	(A)10	10	1769	1778
		TRINITY_DN11996_c0_g1_i4	1	p3	(GGC)5	15	75	89
		TRINITY_DN11996_c0_g1_i6	1	p3	(GGC)5	15	75	89
		TRINITY_DN11996_c0_g1_i3	1	p1	(A)10	10	1993	2002
		TRINITY_DN11906_c0_g1_i5	1	p3	(CGA)5	15	95	109
		TRINITY_DN11906_c0_g1_i3	1	p3	(CGA)5	15	95	109
		TRINITY_DN11906_c0_g1_i2	1	p3	(CCT)5	15	81	95
		TRINITY_DN11934_c0_g1_i3	1	p1	(T)10	10	752	761
		TRINITY_DN11934_c0_g1_i1	1	p1	(T)10	10	795	804
		TRINITY_DN11934_c0_g1_i8	1	p3	(GCC)5	15	17	31
		TRINITY_DN11934_c0_g1_i6	1	p1	(T)10	10	783	792
		TRINITY_DN11934_c0_g1_i10	1	p3	(GCC)6	18	69	86
		TRINITY_DN11934_c0_g1_i4	1	p1	(T)10	10	631	640
		TRINITY_DN11946_c0_g1_i6	1	p1	(A)10	10	2805	2814
		TRINITY_DN11946_c0_g1_i18	1	p1	(A)10	10	2731	2740
		TRINITY_DN11902_c0_g1_i4	1	p2	(CT)8	16	24	39
		TRINITY_DN11902_c0_g1_i7	1	p2	(CT)8	16	24	39
		TRINITY_DN11972_c0_g1_i1	1	p1	(A)10	10	2442	2451
		TRINITY_DN11995_c0_g1_i4	1	p3	(CAG)6	18	701	718
		TRINITY_DN11995_c0_g1_i7	1	p3	(CAG)7	21	701	721
		TRINITY_DN11995_c0_g1_i6	1	p3	(CAG)6	18	429	446
		TRINITY_DN11995_c0_g1_i2	1	p3	(CAG)7	21	475	495
		TRINITY_DN11995_c0_g1_i1	1	p3	(CAG)6	18	478	495
		TRINITY_DN11995_c0_g1_i8	1	p3	(CAG)6	18	590	607
		TRINITY_DN11995_c0_g1_i9	1	p3	(CAG)7	21	530	550
		TRINITY_DN11995_c0_g1_i5	1	p3	(CAG)6	18	761	778
		TRINITY_DN11995_c0_g1_i3	1	p3	(CAG)7	21	701	721
		TRINITY_DN11981_c0_g1_i3	1	p3	(CCA)5	15	120	134
		TRINITY_DN11981_c0_g1_i5	1	p3	(CCA)5	15	120	134
		TRINITY_DN11981_c0_g1_i2	1	p3	(CCA)5	15	120	134
		TRINITY_DN11916_c0_g2_i1	1	p2	(TC)11	22	272	293
		TRINITY_DN11951_c0_g1_i6	1	p2	(TA)6	12	408	419
		TRINITY_DN11951_c0_g1_i1	1	p2	(TA)6	12	771	782
		TRINITY_DN11971_c0_g1_i5	1	p1	(A)10	10	1002	1011
		TRINITY_DN11960_c1_g1_i4	1	p2	(CG)6	12	216	227
		TRINITY_DN11990_c0_g1_i7	1	p3	(GCT)6	18	453	470
		TRINITY_DN11990_c0_g1_i7	2	p3	(CGC)5	15	910	924
		TRINITY_DN11990_c0_g1_i2	1	p3	(GCT)6	18	453	470
		TRINITY_DN11990_c0_g1_i1	1	p3	(GCT)6	18	453	470
		TRINITY_DN11990_c0_g1_i3	1	p3	(GCT)7	21	453	473
		TRINITY_DN11990_c0_g1_i3	2	p3	(CGC)5	15	895	909
		TRINITY_DN11990_c0_g1_i4	1	p3	(GCT)7	21	453	473
		TRINITY_DN11990_c0_g1_i9	1	p3	(GCT)5	15	454	468
		TRINITY_DN11999_c0_g1_i4	1	p3	(AAG)5	15	264	278
		TRINITY_DN11999_c0_g1_i11	1	p3	(AAG)5	15	264	278
		TRINITY_DN11999_c0_g1_i9	1	p3	(AAG)5	15	264	278
		TRINITY_DN11912_c0_g1_i4	1	p3	(TCC)6	18	191	208
		TRINITY_DN11912_c0_g1_i7	1	p3	(TCC)6	18	191	208
		TRINITY_DN11912_c0_g1_i3	1	p3	(TCC)6	18	191	208
		TRINITY_DN11992_c1_g1_i8	1	p1	(T)11	11	456	466
		TRINITY_DN11994_c0_g1_i1	1	p1	(A)10	10	1104	1113
		TRINITY_DN11918_c2_g2_i1	1	p3	(CCA)6	18	147	164
		TRINITY_DN11966_c0_g1_i10	1	p2	(GT)6	12	618	629
		TRINITY_DN11966_c0_g1_i4	1	p2	(GT)6	12	599	610
		TRINITY_DN11907_c0_g1_i1	1	p3	(GAC)5	15	1171	1185
		TRINITY_DN11907_c0_g1_i2	1	p3	(GAT)5	15	1174	1188
		TRINITY_DN11907_c0_g1_i3	1	p3	(GAT)5	15	160	174
		TRINITY_DN11910_c0_g1_i24	1	p1	(C)13	13	1939	1951
		TRINITY_DN11970_c0_g1_i8	1	p3	(ACC)6	18	86	103
		TRINITY_DN11970_c0_g1_i10	1	p2	(CT)9	18	32	49
		TRINITY_DN11944_c0_g1_i7	1	p1	(A)10	10	1513	1522
		TRINITY_DN11976_c1_g1_i6	1	p3	(CAG)6	18	1748	1765
		TRINITY_DN11976_c1_g1_i1	1	p3	(CAG)6	18	1921	1938
		TRINITY_DN11954_c0_g1_i1	1	p2	(AG)7	14	152	165
		TRINITY_DN11954_c0_g1_i7	1	p2	(AG)7	14	152	165
		TRINITY_DN11954_c0_g1_i7	2	p2	(CG)6	12	432	443
		TRINITY_DN11954_c0_g1_i3	1	p3	(CTT)8	24	141	164
		TRINITY_DN11954_c0_g1_i5	1	p3	(CTT)8	24	141	164
		TRINITY_DN11954_c0_g1_i2	1	p2	(AG)7	14	152	165
		TRINITY_DN11954_c0_g1_i2	2	p2	(CG)6	12	432	443
		TRINITY_DN11911_c0_g1_i10	1	p1	(T)10	10	1892	1901
		TRINITY_DN11911_c0_g1_i14	1	p1	(T)10	10	1918	1927
		TRINITY_DN11911_c0_g1_i3	1	p1	(T)10	10	1931	1940
		TRINITY_DN11911_c0_g1_i13	1	p1	(T)10	10	1904	1913
		TRINITY_DN11911_c0_g1_i5	1	p1	(T)10	10	1843	1852
		TRINITY_DN11911_c0_g1_i7	1	p1	(T)10	10	1906	1915
		TRINITY_DN75009_c0_g1_i3	1	p3	(ATG)6	18	504	521
		TRINITY_DN75009_c0_g1_i1	1	p3	(ATG)6	18	429	446
		TRINITY_DN75009_c0_g1_i2	1	p3	(ATG)6	18	504	521
		TRINITY_DN75017_c0_g1_i4	1	p2	(TC)8	16	146	161
		TRINITY_DN75079_c0_g1_i1	1	p2	(TA)6	12	252	263
		TRINITY_DN75054_c0_g1_i5	1	p3	(GAG)5	15	168	182
		TRINITY_DN75071_c0_g1_i3	1	p1	(T)11	11	348	358
		TRINITY_DN75053_c0_g1_i1	1	p2	(AG)17	34	169	202
		TRINITY_DN10236_c0_g1_i6	1	p1	(A)10	10	2350	2359
		TRINITY_DN10299_c0_g1_i1	1	p1	(A)10	10	751	760
		TRINITY_DN10200_c0_g1_i4	1	p3	(CCT)6	18	173	190
		TRINITY_DN10200_c0_g1_i5	1	p3	(CCT)6	18	187	204
		TRINITY_DN10267_c0_g1_i2	1	p3	(GCC)6	18	252	269
		TRINITY_DN10250_c0_g1_i9	1	p2	(TG)23	46	860	905
		TRINITY_DN10250_c0_g1_i4	1	p2	(TG)12	24	821	844
		TRINITY_DN10250_c0_g1_i5	1	p2	(TG)6	12	860	871
		TRINITY_DN10250_c0_g1_i10	1	p3	(CGC)5	15	242	256
		TRINITY_DN10250_c0_g1_i10	2	p2	(TG)11	22	842	863
		TRINITY_DN10250_c0_g1_i8	1	p2	(TG)11	22	836	857
		TRINITY_DN10250_c0_g1_i1	1	p3	(CGC)5	15	242	256
		TRINITY_DN10250_c0_g2_i3	1	p2	(TG)9	18	701	718
		TRINITY_DN10250_c0_g2_i2	1	p2	(GT)12	24	537	560
		TRINITY_DN10250_c0_g2_i1	1	p2	(TG)9	18	701	718
		TRINITY_DN10250_c2_g1_i1	1	p2	(CA)11	22	45	66
		TRINITY_DN10261_c0_g1_i6	1	p1	(T)12	12	1800	1811
		TRINITY_DN10261_c0_g2_i1	1	p1	(A)10	10	199	208
		TRINITY_DN10261_c0_g3_i1	1	p2	(CA)7	14	44	57
		TRINITY_DN10261_c3_g1_i1	1	c*	(C)11(CA)7*	24	1062	1085
		TRINITY_DN10229_c0_g1_i5	1	p3	(CGC)5	15	270	284
		TRINITY_DN10281_c0_g1_i2	1	p3	(CGG)6	18	39	56
		TRINITY_DN10281_c0_g1_i3	1	p1	(T)10	10	898	907
		TRINITY_DN10281_c1_g1_i4	1	p3	(CGG)8	24	87	110
		TRINITY_DN10281_c1_g1_i2	1	p3	(CGG)8	24	87	110
		TRINITY_DN10281_c1_g1_i6	1	p3	(CGG)8	24	87	110
		TRINITY_DN10281_c1_g1_i7	1	p3	(GGC)7	21	5	25
		TRINITY_DN10281_c1_g1_i1	1	p3	(CGG)8	24	87	110
		TRINITY_DN10281_c2_g1_i1	1	p3	(GCG)7	21	581	601
		TRINITY_DN10269_c0_g1_i15	1	p1	(T)10	10	1719	1728
		TRINITY_DN10269_c0_g1_i18	1	p1	(A)11	11	1034	1044
		TRINITY_DN10269_c0_g1_i8	1	p1	(T)10	10	2963	2972
		TRINITY_DN10269_c0_g1_i12	1	p1	(A)11	11	1034	1044
		TRINITY_DN10269_c0_g1_i9	1	p1	(T)10	10	1825	1834
		TRINITY_DN10269_c0_g1_i10	1	p1	(A)11	11	1140	1150
		TRINITY_DN10269_c0_g1_i10	2	p1	(T)10	10	2963	2972
		TRINITY_DN10269_c0_g1_i16	1	p1	(T)10	10	2857	2866
		TRINITY_DN10269_c0_g1_i13	1	p1	(A)11	11	1140	1150
		TRINITY_DN10269_c0_g1_i13	2	p1	(T)10	10	2963	2972
		TRINITY_DN10269_c0_g1_i14	1	p1	(A)11	11	1034	1044
		TRINITY_DN10269_c0_g1_i14	2	p1	(T)10	10	2857	2866
		TRINITY_DN10262_c0_g1_i3	1	p2	(GA)12	24	47	70
		TRINITY_DN10262_c0_g1_i1	1	p2	(GA)8	16	47	62
		TRINITY_DN10262_c0_g1_i6	1	p2	(GA)12	24	47	70
		TRINITY_DN10262_c0_g1_i4	1	p2	(GA)8	16	47	62
		TRINITY_DN10262_c0_g1_i5	1	p2	(GA)8	16	47	62
		TRINITY_DN10223_c0_g1_i3	1	p3	(ACT)5	15	1222	1236
		TRINITY_DN10223_c0_g1_i2	1	p3	(ACT)5	15	1222	1236
		TRINITY_DN10223_c0_g1_i7	1	p3	(ACT)5	15	1222	1236
		TRINITY_DN10223_c0_g1_i11	1	p3	(ACT)5	15	1253	1267
		TRINITY_DN10223_c0_g1_i1	1	p3	(ACT)5	15	815	829
		TRINITY_DN10223_c0_g1_i5	1	p3	(ACT)5	15	1222	1236
		TRINITY_DN10223_c0_g1_i6	1	p3	(ACT)5	15	1253	1267
		TRINITY_DN10223_c0_g1_i9	1	p3	(ACT)5	15	1210	1224
		TRINITY_DN10257_c0_g1_i7	1	p2	(TC)6	12	35	46
		TRINITY_DN10257_c0_g1_i7	2	p3	(CGC)5	15	228	242
		TRINITY_DN10257_c0_g1_i5	1	p2	(TC)6	12	35	46
		TRINITY_DN10257_c0_g1_i5	2	p3	(CGC)5	15	228	242
		TRINITY_DN10257_c0_g1_i6	1	p2	(TC)6	12	35	46
		TRINITY_DN10257_c0_g1_i6	2	p3	(CGC)5	15	228	242
		TRINITY_DN10257_c0_g1_i8	1	p2	(TC)6	12	35	46
		TRINITY_DN10257_c0_g1_i8	2	p3	(CGC)5	15	228	242
		TRINITY_DN10257_c0_g1_i1	1	p2	(TC)6	12	35	46
		TRINITY_DN10257_c0_g1_i1	2	p3	(CGC)5	15	228	242
		TRINITY_DN10257_c0_g1_i10	1	p2	(TC)6	12	35	46
		TRINITY_DN10217_c0_g1_i2	1	p3	(GCC)5	15	409	423
		TRINITY_DN10217_c0_g1_i3	1	p3	(GCC)5	15	412	426
		TRINITY_DN10217_c0_g1_i5	1	p3	(CGC)5	15	218	232
		TRINITY_DN10273_c0_g1_i1	1	p3	(CTC)5	15	186	200
		TRINITY_DN10268_c0_g1_i9	1	p2	(TG)6	12	1580	1591
		TRINITY_DN10268_c0_g1_i9	2	p2	(GC)6	12	1705	1716
		TRINITY_DN10268_c0_g1_i1	1	p2	(TG)6	12	1575	1586
		TRINITY_DN10268_c0_g1_i1	2	p2	(GC)6	12	1700	1711
		TRINITY_DN10268_c0_g1_i7	1	p2	(TG)6	12	1580	1591
		TRINITY_DN10268_c0_g1_i15	1	p2	(TG)6	12	1521	1532
		TRINITY_DN10268_c0_g1_i10	1	p2	(TG)6	12	1575	1586
		TRINITY_DN10268_c0_g1_i3	1	p2	(TG)6	12	117	128
		TRINITY_DN10268_c0_g1_i4	1	p2	(TG)6	12	1521	1532
		TRINITY_DN10206_c0_g1_i2	1	p2	(CT)6	12	18	29
		TRINITY_DN10206_c0_g1_i2	2	p3	(CAC)7	21	251	271
		TRINITY_DN10206_c0_g1_i6	1	p2	(CT)6	12	18	29
		TRINITY_DN10206_c0_g1_i6	2	p3	(CAC)7	21	251	271
		TRINITY_DN10206_c0_g1_i1	1	p3	(CAC)7	21	101	121
		TRINITY_DN10206_c0_g1_i4	1	c	(CT)6aaccacccactctcgtcagtcatcacccccaccacaaccccatgctctccaccatttccatcgacagttactg(CT)6	97	18	114
		TRINITY_DN10206_c0_g1_i4	2	p3	(CAC)7	21	263	283
		TRINITY_DN10206_c0_g1_i5	1	c	(CT)6aaccacccactctcgtcagtcatcacccccaccacaaccccatgctctccaccatttccatcgacagttactg(CT)6	97	18	114
		TRINITY_DN10206_c0_g1_i5	2	p3	(CAC)7	21	263	283
		TRINITY_DN10206_c0_g1_i3	1	p3	(CAC)7	21	101	121
		TRINITY_DN10206_c1_g1_i1	1	p3	(CAG)5	15	489	503
		TRINITY_DN10206_c1_g1_i2	1	p3	(CAG)5	15	445	459
		TRINITY_DN10209_c0_g1_i1	1	p3	(AGG)5	15	409	423
		TRINITY_DN10209_c0_g1_i7	1	p3	(AGG)5	15	409	423
		TRINITY_DN10209_c0_g1_i2	1	p3	(AGG)5	15	409	423
		TRINITY_DN10209_c0_g1_i3	1	p3	(AGG)5	15	409	423
		TRINITY_DN10292_c0_g1_i1	1	p3	(CCG)5	15	3566	3580
		TRINITY_DN10292_c0_g1_i8	1	p3	(CCG)5	15	2715	2729
		TRINITY_DN10292_c0_g1_i9	1	p3	(CCG)5	15	3081	3095
		TRINITY_DN10292_c0_g1_i6	1	p3	(CCG)5	15	3315	3329
		TRINITY_DN10292_c0_g1_i5	1	p3	(CCG)5	15	1517	1531
		TRINITY_DN10292_c0_g1_i3	1	p3	(CCG)5	15	3451	3465
		TRINITY_DN10292_c0_g1_i10	1	p3	(CCG)5	15	2966	2980
		TRINITY_DN10292_c0_g1_i2	1	p3	(CCG)5	15	2002	2016
		TRINITY_DN10292_c0_g1_i7	1	p3	(CCG)5	15	3200	3214
		TRINITY_DN10294_c0_g1_i14	1	p3	(GGA)6	18	36	53
		TRINITY_DN10294_c0_g1_i7	1	p3	(GGA)6	18	36	53
		TRINITY_DN10294_c0_g1_i11	1	p3	(GGA)6	18	36	53
		TRINITY_DN10277_c0_g1_i3	1	p1	(A)13	13	759	771
		TRINITY_DN10277_c0_g1_i1	1	p1	(A)11	11	752	762
		TRINITY_DN10235_c0_g2_i1	1	p1	(T)10	10	935	944
		TRINITY_DN10295_c0_g1_i9	1	p1	(T)10	10	205	214
		TRINITY_DN10233_c0_g1_i4	1	p1	(T)11	11	2039	2049
		TRINITY_DN10233_c0_g1_i2	1	p1	(T)11	11	2033	2043
		TRINITY_DN10233_c0_g1_i3	1	p1	(T)11	11	3539	3549
		TRINITY_DN10265_c0_g1_i1	1	p3	(TCC)7	21	653	673
		TRINITY_DN10225_c0_g1_i1	1	p3	(TGC)6	18	115	132
		TRINITY_DN10220_c0_g1_i1	1	p3	(CAG)7	21	2462	2482
		TRINITY_DN10220_c0_g1_i6	1	p3	(CAG)7	21	2477	2497
		TRINITY_DN10220_c0_g1_i3	1	p3	(CAG)7	21	2462	2482
		TRINITY_DN10266_c0_g1_i5	1	p1	(T)10	10	1003	1012
		TRINITY_DN10249_c0_g2_i2	1	p2	(AG)8	16	786	801
		TRINITY_DN10249_c0_g2_i1	1	p2	(AG)8	16	786	801
		TRINITY_DN10249_c1_g1_i2	1	p2	(AG)8	16	522	537
		TRINITY_DN10224_c0_g1_i2	1	p2	(TC)7	14	141	154
		TRINITY_DN10224_c0_g1_i5	1	p2	(CT)6	12	142	153
		TRINITY_DN10224_c0_g1_i1	1	p2	(TC)7	14	141	154
		TRINITY_DN10224_c0_g2_i1	1	p3	(TCC)5	15	34	48
[truncated: 2,676 more rows]

## Sheet: Mutant-R2
		ID	SSR nr.	SSR type	SSR	size	start	end
		TRINITY_DN69561_c0_g1_i2	1	p1	(T)10	10	479	488
		TRINITY_DN69561_c0_g1_i5	1	p1	(T)10	10	584	593
		TRINITY_DN69550_c0_g1_i2	1	p4	(CATC)5	20	265	284
		TRINITY_DN69522_c0_g1_i6	1	p3	(CCG)6	18	232	249
		TRINITY_DN69522_c0_g1_i2	1	p3	(CCG)6	18	232	249
		TRINITY_DN69595_c1_g1_i1	1	p3	(CCG)5	15	102	116
		TRINITY_DN69505_c0_g2_i1	1	p1	(A)10	10	639	648
		TRINITY_DN69527_c0_g2_i2	1	p3	(GGC)5	15	108	122
		TRINITY_DN69527_c0_g2_i1	1	p3	(GGC)5	15	97	111
		TRINITY_DN69575_c0_g1_i3	1	p2	(GT)7	14	98	111
		TRINITY_DN28078_c0_g1_i8	1	p4	(GATT)5	20	84	103
		TRINITY_DN28078_c0_g1_i2	1	p4	(GATT)5	20	89	108
		TRINITY_DN28078_c0_g1_i5	1	p4	(GATT)5	20	89	108
		TRINITY_DN28078_c0_g1_i4	1	p4	(GATT)5	20	89	108
		TRINITY_DN28006_c0_g1_i1	1	p1	(A)10	10	8	17
		TRINITY_DN28030_c0_g1_i1	1	c	(TCC)5(CT)19gcatggatgcgtaatggcacat(GCA)5	90	51	140
		TRINITY_DN28030_c0_g1_i6	1	c	(TCC)5(CT)19	53	51	103
		TRINITY_DN28030_c0_g1_i5	1	c	(TCC)5(CT)19	53	51	103
		TRINITY_DN28030_c0_g1_i4	1	c	(TCC)5(CT)19gcatggatgcgtaatggcacat(GCA)5	90	51	140
		TRINITY_DN28030_c0_g1_i2	1	c	(TCC)5(CT)19gcgtgatgcgtaatggcacat(GCA)6	92	51	142
		TRINITY_DN28030_c0_g1_i3	1	p2	(CT)17	34	70	103
		TRINITY_DN28092_c0_g1_i2	1	p3	(TTC)6	18	238	255
		TRINITY_DN28092_c0_g2_i2	1	p3	(TTC)11	33	584	616
		TRINITY_DN28090_c0_g1_i5	1	p2	(TG)10	20	1304	1323
		TRINITY_DN28090_c0_g1_i5	2	p1	(T)10	10	1475	1484
		TRINITY_DN28090_c0_g1_i11	1	p2	(TG)12	24	1286	1309
		TRINITY_DN28090_c0_g1_i2	1	p2	(TG)10	20	1310	1329
		TRINITY_DN28090_c0_g1_i2	2	p1	(T)10	10	1481	1490
		TRINITY_DN28072_c0_g1_i4	1	p3	(GCT)6	18	68	85
		TRINITY_DN28072_c0_g1_i12	1	p3	(GCT)6	18	68	85
		TRINITY_DN28072_c0_g1_i3	1	p3	(GCT)6	18	68	85
		TRINITY_DN28068_c0_g1_i6	1	p2	(CG)6	12	309	320
		TRINITY_DN28068_c0_g1_i7	1	p2	(CG)6	12	309	320
		TRINITY_DN28068_c0_g1_i2	1	p2	(CG)6	12	309	320
		TRINITY_DN28068_c0_g1_i11	1	p2	(CG)6	12	309	320
		TRINITY_DN28039_c0_g1_i2	1	c	(CG)7tgccgtataaagtctcccacagctcacacgggcagccgcctgcctagctagccgctggtagaggaggagaagccgt(AG)8ttcagagaggagatagagagttcagagaggagat(AG)6ttcagagag(GA)6gttcagagaggagacagagg(GA)7	207	221	427
		TRINITY_DN28039_c0_g1_i3	1	c	(AG)8ttcagagaggagatagagagttcagagaggagat(AG)6ttcagagag(GA)6gttcagagaggagacagagg(GA)7	117	226	342
		TRINITY_DN28039_c0_g1_i1	1	p2	(CG)6	12	218	229
		TRINITY_DN28039_c0_g1_i1	2	p2	(AG)12	24	331	354
		TRINITY_DN28039_c0_g1_i4	1	c	(AG)12ggagagagttcagagag(GA)6	53	219	271
		TRINITY_DN28039_c1_g1_i1	1	p2	(CA)10	20	17	36
		TRINITY_DN28066_c0_g1_i3	1	p2	(CT)25	50	311	360
		TRINITY_DN28044_c3_g1_i1	1	p2	(CA)7	14	48	61
		TRINITY_DN28059_c0_g1_i1	1	p2	(CT)7	14	54	67
		TRINITY_DN28083_c0_g1_i1	1	p3	(GCA)5	15	287	301
		TRINITY_DN28083_c0_g1_i2	1	p3	(GCA)5	15	287	301
		TRINITY_DN28036_c0_g1_i8	1	p1	(T)10	10	1607	1616
		TRINITY_DN28036_c0_g1_i2	1	p1	(T)10	10	771	780
		TRINITY_DN28011_c1_g1_i1	1	p4	(AAGG)6	24	114	137
		TRINITY_DN28050_c0_g2_i2	1	p2	(TC)6	12	646	657
		TRINITY_DN28050_c0_g2_i1	1	p2	(TC)6	12	320	331
		TRINITY_DN28098_c1_g1_i1	1	p3	(GCC)5	15	122	136
		TRINITY_DN28069_c0_g1_i6	1	p2	(GT)8	16	165	180
		TRINITY_DN91516_c0_g1_i1	1	p2	(TG)7	14	102	115
		TRINITY_DN91563_c1_g1_i1	1	p1	(T)11	11	247	257
		TRINITY_DN91536_c0_g1_i4	1	p3	(TTG)6	18	439	456
		TRINITY_DN91536_c0_g1_i3	1	p4	(TACA)6	24	33	56
		TRINITY_DN91536_c0_g1_i2	1	p4	(TACA)6	24	33	56
		TRINITY_DN91521_c0_g1_i1	1	p2	(AC)10	20	144	163
		TRINITY_DN30190_c0_g1_i1	1	c	(CGA)5catcaacacgaccttgtggaagctccgatgccgacgacgtagacgcgtggcatatat(TG)9	90	137	226
		TRINITY_DN30101_c0_g1_i1	1	p3	(CTC)5	15	46	60
		TRINITY_DN30101_c0_g1_i1	2	p3	(GGA)5	15	516	530
		TRINITY_DN30101_c0_g1_i2	1	p3	(CAC)6	18	96	113
		TRINITY_DN30101_c0_g1_i2	2	p3	(GGA)5	15	516	530
		TRINITY_DN30101_c0_g2_i6	1	c	(CT)11cc(CT)6	36	326	361
		TRINITY_DN30101_c0_g2_i6	2	p3	(CCA)5	15	1484	1498
		TRINITY_DN30101_c0_g2_i6	3	p3	(TTC)6	18	1670	1687
		TRINITY_DN30101_c0_g2_i4	1	c	(CT)11cc(CT)6	36	326	361
		TRINITY_DN30101_c0_g2_i4	2	p3	(CCA)5	15	1484	1498
		TRINITY_DN30101_c0_g2_i4	3	p3	(TTC)6	18	1678	1695
		TRINITY_DN30101_c0_g2_i8	1	p2	(CT)6	12	350	361
		TRINITY_DN30138_c0_g1_i2	1	p4	(TTGC)5	20	47	66
		TRINITY_DN30138_c0_g1_i1	1	p4	(TTGC)5	20	47	66
		TRINITY_DN30172_c0_g1_i3	1	p2	(GT)6	12	42	53
		TRINITY_DN30172_c0_g1_i1	1	p2	(GT)6	12	42	53
		TRINITY_DN30121_c0_g1_i4	1	p2	(GA)9	18	50	67
		TRINITY_DN30197_c0_g1_i4	1	p3	(AAT)5	15	1987	2001
		TRINITY_DN30197_c0_g1_i3	1	p3	(GCT)5	15	108	122
		TRINITY_DN30197_c0_g1_i3	2	p3	(AAT)5	15	1974	1988
		TRINITY_DN30155_c0_g1_i1	1	p2	(CA)11	22	139	160
		TRINITY_DN30155_c0_g1_i3	1	p1	(T)10	10	89	98
		TRINITY_DN30125_c0_g1_i2	1	p3	(TGC)5	15	1322	1336
		TRINITY_DN30125_c0_g1_i3	1	p3	(GAG)5	15	486	500
		TRINITY_DN30161_c0_g3_i1	1	p3	(AGG)5	15	407	421
		TRINITY_DN30159_c0_g1_i1	1	p1	(T)11	11	318	328
		TRINITY_DN144_c0_g1_i10	1	p4	(CATC)5	20	194	213
		TRINITY_DN144_c0_g1_i7	1	p4	(CATC)5	20	194	213
		TRINITY_DN144_c0_g1_i8	1	p4	(CATC)5	20	194	213
		TRINITY_DN144_c0_g1_i6	1	p4	(CATC)5	20	194	213
		TRINITY_DN144_c0_g1_i2	1	p4	(CATC)5	20	194	213
		TRINITY_DN144_c0_g1_i3	1	p4	(CATC)5	20	194	213
		TRINITY_DN144_c0_g1_i4	1	p4	(CATC)5	20	194	213
		TRINITY_DN144_c0_g1_i11	1	p4	(CATC)5	20	194	213
		TRINITY_DN144_c0_g1_i13	1	p4	(CATC)5	20	194	213
		TRINITY_DN179_c1_g1_i1	1	p3	(TGA)5	15	442	456
		TRINITY_DN179_c1_g1_i2	1	p3	(TGA)5	15	442	456
		TRINITY_DN194_c0_g2_i1	1	p2	(GA)6	12	285	296
		TRINITY_DN177_c1_g2_i1	1	p1	(C)10	10	220	229
		TRINITY_DN184_c2_g1_i1	1	p1	(A)10	10	197	206
		TRINITY_DN151_c0_g1_i1	1	p1	(A)11	11	1382	1392
		TRINITY_DN193_c0_g1_i7	1	p2	(CG)6	12	197	208
		TRINITY_DN193_c0_g1_i6	1	p1	(A)10	10	35	44
		TRINITY_DN193_c0_g1_i6	2	p2	(CG)6	12	197	208
		TRINITY_DN193_c0_g1_i9	1	p1	(A)10	10	35	44
		TRINITY_DN193_c0_g1_i9	2	p2	(CG)6	12	197	208
		TRINITY_DN193_c0_g1_i4	1	p1	(A)10	10	38	47
		TRINITY_DN122_c0_g1_i2	1	p3	(CTC)5	15	1026	1040
		TRINITY_DN122_c0_g1_i8	1	p3	(CTC)5	15	997	1011
		TRINITY_DN122_c0_g1_i9	1	p3	(CTC)5	15	997	1011
		TRINITY_DN122_c0_g1_i4	1	p3	(CTC)5	15	1035	1049
		TRINITY_DN122_c0_g1_i5	1	p3	(CTC)5	15	1026	1040
		TRINITY_DN139_c0_g1_i3	1	p4	(TGTA)5	20	1941	1960
		TRINITY_DN138_c0_g1_i3	1	p4	(AGGA)6	24	33	56
		TRINITY_DN198_c0_g1_i7	1	p1	(T)11	11	2355	2365
		TRINITY_DN100_c0_g1_i3	1	p1	(T)10	10	5984	5993
		TRINITY_DN100_c0_g2_i1	1	p3	(TCC)5	15	245	259
		TRINITY_DN125_c0_g1_i10	1	p1	(T)10	10	1044	1053
		TRINITY_DN132_c0_g2_i4	1	p1	(T)10	10	1224	1233
		TRINITY_DN164_c2_g1_i2	1	p3	(GAA)8	24	249	272
		TRINITY_DN164_c2_g2_i2	1	p3	(GAA)7	21	38	58
		TRINITY_DN164_c2_g2_i3	1	p3	(GAA)7	21	38	58
		TRINITY_DN164_c2_g2_i1	1	p3	(AAG)5	15	132	146
		TRINITY_DN140_c0_g1_i8	1	p2	(CA)21	42	33	74
		TRINITY_DN140_c0_g1_i7	1	p2	(CA)10	20	55	74
		TRINITY_DN189_c0_g2_i4	1	p1	(T)11	11	2360	2370
		TRINITY_DN121_c0_g3_i1	1	p3	(TTG)5	15	846	860
		TRINITY_DN121_c1_g1_i1	1	p3	(TTG)5	15	126	140
		TRINITY_DN176_c1_g1_i1	1	p2	(CT)12	24	268	291
		TRINITY_DN176_c1_g1_i5	1	p2	(CT)6	12	274	285
		TRINITY_DN176_c1_g1_i3	1	p2	(CT)14	28	274	301
		TRINITY_DN176_c1_g1_i4	1	p2	(CT)14	28	274	301
		TRINITY_DN176_c1_g1_i2	1	p2	(CT)14	28	268	295
		TRINITY_DN176_c4_g1_i1	1	p2	(CT)8	16	343	358
		TRINITY_DN187_c0_g1_i1	1	p2	(CA)8	16	25	40
		TRINITY_DN187_c0_g1_i2	1	p2	(CA)8	16	25	40
		TRINITY_DN187_c1_g1_i6	1	p3	(ACG)5	15	322	336
		TRINITY_DN187_c1_g1_i2	1	p3	(ACG)5	15	322	336
		TRINITY_DN187_c1_g1_i7	1	p3	(ACG)5	15	322	336
		TRINITY_DN187_c1_g1_i9	1	p3	(ACG)5	15	336	350
		TRINITY_DN187_c1_g1_i5	1	p3	(ACG)5	15	336	350
		TRINITY_DN187_c1_g1_i10	1	p3	(ACG)5	15	336	350
		TRINITY_DN187_c1_g1_i4	1	p3	(ACG)5	15	336	350
		TRINITY_DN187_c1_g1_i8	1	p3	(ACG)5	15	322	336
		TRINITY_DN115_c0_g1_i8	1	c	(TG)9tcggtc(T)10	34	465	498
		TRINITY_DN119_c0_g1_i19	1	p2	(TC)6	12	88	99
		TRINITY_DN119_c0_g1_i2	1	p2	(TC)6	12	88	99
		TRINITY_DN119_c0_g1_i14	1	p2	(TC)6	12	88	99
		TRINITY_DN119_c0_g1_i4	1	p2	(TC)11	22	53	74
		TRINITY_DN119_c0_g1_i22	1	p2	(TC)6	12	88	99
		TRINITY_DN133_c0_g1_i3	1	c	(CCA)5(CAA)5	30	45	74
		TRINITY_DN133_c0_g1_i3	2	p2	(TG)12	24	550	573
		TRINITY_DN133_c0_g1_i1	1	c	(CCA)5(CAA)5	30	45	74
		TRINITY_DN133_c0_g1_i2	1	c	(CCA)5(CAA)5	30	45	74
		TRINITY_DN133_c1_g1_i2	1	p2	(TG)17	34	942	975
		TRINITY_DN133_c1_g1_i4	1	p2	(TG)6	12	942	953
		TRINITY_DN133_c1_g1_i1	1	p2	(TG)6	12	938	949
		TRINITY_DN133_c1_g1_i3	1	p2	(TG)23	46	942	987
		TRINITY_DN104_c0_g1_i5	1	p3	(TGC)5	15	1110	1124
		TRINITY_DN131_c0_g1_i4	1	p3	(CGG)6	18	71	88
		TRINITY_DN131_c0_g1_i1	1	p3	(CGG)6	18	71	88
		TRINITY_DN131_c0_g1_i2	1	p3	(CGG)6	18	71	88
		TRINITY_DN131_c0_g1_i5	1	p3	(CGG)6	18	71	88
		TRINITY_DN150_c0_g1_i4	1	p2	(TG)7	14	1783	1796
		TRINITY_DN150_c0_g1_i1	1	p2	(TG)7	14	1783	1796
		TRINITY_DN169_c0_g1_i6	1	p3	(TGG)5	15	446	460
		TRINITY_DN169_c0_g1_i1	1	p3	(TGG)5	15	446	460
		TRINITY_DN145_c0_g1_i1	1	p3	(TAC)6	18	1673	1690
		TRINITY_DN163_c0_g3_i3	1	p3	(GCG)5	15	287	301
		TRINITY_DN175_c0_g1_i2	1	p3	(CGG)5	15	158	172
		TRINITY_DN175_c0_g1_i5	1	p3	(CGG)5	15	158	172
		TRINITY_DN175_c0_g1_i7	1	p3	(CGG)5	15	158	172
		TRINITY_DN181_c0_g1_i7	1	p1	(A)11	11	277	287
		TRINITY_DN181_c0_g1_i7	2	p2	(GT)6	12	1261	1272
		TRINITY_DN181_c0_g1_i1	1	p2	(GT)6	12	1336	1347
		TRINITY_DN107_c0_g1_i8	1	p1	(A)11	11	1576	1586
		TRINITY_DN107_c0_g1_i6	1	p1	(T)11	11	1101	1111
		TRINITY_DN107_c0_g1_i11	1	p1	(A)12	12	1005	1016
		TRINITY_DN107_c0_g1_i18	1	p1	(T)11	11	1101	1111
		TRINITY_DN107_c0_g1_i9	1	p1	(A)11	11	1550	1560
		TRINITY_DN188_c1_g1_i3	1	p3	(GCT)5	15	340	354
		TRINITY_DN188_c1_g1_i3	2	p2	(TC)6	12	510	521
		TRINITY_DN188_c1_g1_i6	1	p3	(GCT)5	15	340	354
		TRINITY_DN188_c1_g1_i6	2	p2	(TC)6	12	510	521
		TRINITY_DN188_c1_g1_i4	1	p2	(TC)6	12	198	209
		TRINITY_DN188_c1_g1_i10	1	p2	(TC)6	12	198	209
		TRINITY_DN188_c4_g1_i4	1	p2	(TC)17	34	48	81
		TRINITY_DN188_c4_g1_i1	1	p2	(TC)23	46	284	329
		TRINITY_DN188_c5_g1_i5	1	p1	(C)12	12	186	197
		TRINITY_DN108_c1_g2_i2	1	p3	(CAG)5	15	49	63
		TRINITY_DN108_c1_g2_i1	1	p3	(CAG)5	15	49	63
		TRINITY_DN118_c1_g1_i2	1	p3	(GAA)5	15	1074	1088
		TRINITY_DN118_c1_g1_i1	1	p3	(AGA)7	21	1070	1090
		TRINITY_DN155_c0_g1_i10	1	p1	(T)10	10	3615	3624
		TRINITY_DN155_c0_g1_i1	1	p1	(T)10	10	3618	3627
		TRINITY_DN155_c0_g1_i11	1	p3	(AGC)5	15	26	40
		TRINITY_DN142_c0_g1_i5	1	p1	(T)10	10	1986	1995
		TRINITY_DN142_c0_g1_i8	1	p3	(CCT)6	18	835	852
		TRINITY_DN142_c0_g1_i8	2	p1	(T)10	10	1994	2003
		TRINITY_DN142_c0_g1_i9	1	p1	(T)10	10	1994	2003
		TRINITY_DN142_c0_g1_i6	1	p3	(CCT)6	18	836	853
		TRINITY_DN142_c0_g1_i6	2	p1	(T)10	10	1995	2004
		TRINITY_DN142_c0_g1_i10	1	p1	(T)10	10	2004	2013
		TRINITY_DN171_c0_g1_i3	1	p1	(T)10	10	1103	1112
		TRINITY_DN171_c0_g1_i7	1	p1	(T)10	10	1085	1094
		TRINITY_DN171_c0_g1_i10	1	p3	(CTC)5	15	133	147
		TRINITY_DN171_c0_g1_i4	1	p1	(T)10	10	1109	1118
		TRINITY_DN171_c0_g1_i6	1	p3	(CTC)5	15	133	147
		TRINITY_DN171_c0_g1_i6	2	p1	(T)10	10	1088	1097
		TRINITY_DN161_c0_g2_i3	1	p3	(CCG)5	15	220	234
		TRINITY_DN161_c0_g2_i3	2	p3	(CCA)6	18	2081	2098
		TRINITY_DN161_c0_g2_i2	1	p3	(CCG)5	15	220	234
		TRINITY_DN161_c0_g2_i2	2	p3	(CCA)6	18	2081	2098
		TRINITY_DN161_c0_g2_i1	1	p3	(CCG)5	15	220	234
		TRINITY_DN161_c0_g2_i1	2	p3	(CCA)6	18	2081	2098
		TRINITY_DN161_c0_g3_i1	1	p3	(GGC)5	15	423	437
		TRINITY_DN101_c0_g1_i1	1	p2	(GT)7	14	903	916
		TRINITY_DN123_c0_g1_i2	1	p3	(AGG)5	15	104	118
		TRINITY_DN123_c0_g1_i1	1	p3	(AGG)5	15	104	118
		TRINITY_DN123_c0_g2_i1	1	p3	(AGG)5	15	284	298
		TRINITY_DN123_c0_g2_i2	1	p3	(AGG)5	15	284	298
		TRINITY_DN124_c1_g1_i1	1	p3	(ACA)5	15	644	658
		TRINITY_DN110_c0_g1_i4	1	p3	(CGA)6	18	39	56
		TRINITY_DN110_c0_g1_i2	1	p3	(GAC)5	15	449	463
		TRINITY_DN110_c0_g1_i3	1	p3	(CGA)6	18	39	56
		TRINITY_DN110_c0_g1_i1	1	p3	(GAC)5	15	449	463
		TRINITY_DN113_c0_g2_i2	1	p3	(GCC)7	21	30	50
		TRINITY_DN111_c0_g2_i7	1	p1	(T)11	11	1193	1203
		TRINITY_DN103_c0_g1_i5	1	p3	(AAG)5	15	831	845
		TRINITY_DN103_c0_g1_i4	1	p3	(AAG)5	15	831	845
		TRINITY_DN103_c0_g1_i3	1	p3	(AAG)5	15	831	845
		TRINITY_DN103_c0_g1_i6	1	p3	(AAG)5	15	590	604
		TRINITY_DN103_c0_g1_i2	1	p3	(AAG)5	15	831	845
		TRINITY_DN103_c0_g1_i1	1	p3	(AAG)5	15	590	604
		TRINITY_DN103_c0_g2_i2	1	p3	(AGG)5	15	339	353
		TRINITY_DN103_c0_g2_i1	1	p3	(AGG)5	15	339	353
		TRINITY_DN88680_c0_g1_i6	1	p3	(TGT)7	21	233	253
		TRINITY_DN88680_c2_g1_i1	1	p3	(TTG)6	18	342	359
		TRINITY_DN88600_c0_g1_i3	1	p2	(TC)7	14	38	51
		TRINITY_DN88622_c0_g1_i2	1	p1	(T)10	10	233	242
		TRINITY_DN88647_c0_g1_i1	1	p2	(AC)6	12	116	127
		TRINITY_DN88602_c0_g1_i5	1	p3	(TTC)6	18	1082	1099
		TRINITY_DN88682_c0_g1_i1	1	p3	(GCC)5	15	50	64
		TRINITY_DN88643_c0_g2_i1	1	p1	(G)12	12	516	527
		TRINITY_DN88609_c0_g4_i1	1	p3	(CGG)6	18	148	165
		TRINITY_DN88609_c0_g4_i2	1	p3	(CGG)6	18	148	165
		TRINITY_DN57057_c0_g1_i2	1	p3	(TTC)5	15	394	408
		TRINITY_DN57046_c0_g1_i2	1	p1	(A)10	10	279	288
		TRINITY_DN57020_c0_g1_i1	1	p2	(TC)10	20	1058	1077
		TRINITY_DN57045_c1_g1_i5	1	p3	(CCG)5	15	214	228
		TRINITY_DN57001_c0_g3_i2	1	p3	(CAG)5	15	852	866
		TRINITY_DN57098_c0_g1_i3	1	p3	(TTG)8	24	175	198
		TRINITY_DN57098_c0_g1_i5	1	p3	(TTG)8	24	175	198
		TRINITY_DN57098_c0_g1_i6	1	p3	(TGC)6	18	189	206
		TRINITY_DN59536_c0_g1_i1	1	p1	(T)10	10	67	76
		TRINITY_DN59536_c0_g2_i2	1	p2	(GT)6	12	206	217
		TRINITY_DN59536_c0_g2_i1	1	p2	(GT)6	12	209	220
		TRINITY_DN59513_c0_g1_i2	1	p2	(GT)7	14	677	690
		TRINITY_DN59513_c0_g3_i1	1	p2	(GT)7	14	194	207
		TRINITY_DN59549_c0_g1_i1	1	p1	(T)10	10	443	452
		TRINITY_DN59519_c0_g1_i6	1	p3	(TCC)7	21	41	61
		TRINITY_DN59564_c0_g1_i4	1	p1	(A)10	10	217	226
		TRINITY_DN59529_c0_g1_i1	1	p1	(A)10	10	8	17
		TRINITY_DN59596_c0_g1_i3	1	p2	(GA)6	12	496	507
		TRINITY_DN59596_c0_g1_i4	1	p2	(GA)6	12	655	666
		TRINITY_DN59574_c0_g1_i3	1	p1	(G)11	11	982	992
		TRINITY_DN59516_c0_g1_i1	1	p3	(GTC)5	15	179	193
		TRINITY_DN59545_c0_g1_i2	1	p3	(GCC)7	21	131	151
		TRINITY_DN18702_c0_g1_i6	1	p3	(AGC)5	15	422	436
		TRINITY_DN18702_c0_g1_i5	1	p3	(AGC)5	15	422	436
		TRINITY_DN18702_c0_g1_i4	1	p3	(AGC)5	15	422	436
		TRINITY_DN18736_c0_g2_i2	1	p2	(TC)16	32	874	905
		TRINITY_DN18775_c0_g1_i4	1	p5	(GCTTG)5	25	185	209
		TRINITY_DN18775_c1_g1_i1	1	p3	(GAG)6	18	294	311
		TRINITY_DN18742_c0_g1_i1	1	p2	(CA)8	16	827	842
		TRINITY_DN18715_c1_g1_i1	1	p1	(T)10	10	294	303
		TRINITY_DN18749_c0_g1_i5	1	p3	(CCG)5	15	34	48
		TRINITY_DN18737_c0_g1_i7	1	p3	(AGG)5	15	69	83
		TRINITY_DN18730_c0_g1_i6	1	p3	(TCC)6	18	33	50
		TRINITY_DN18730_c0_g1_i2	1	p3	(TCC)6	18	33	50
		TRINITY_DN18730_c0_g1_i2	2	p2	(GA)16	32	745	776
		TRINITY_DN18730_c0_g1_i7	1	p2	(GA)16	32	1163	1194
		TRINITY_DN18730_c0_g1_i8	1	p2	(GA)16	32	1395	1426
		TRINITY_DN18730_c0_g1_i1	1	p3	(TCC)6	18	33	50
		TRINITY_DN18730_c0_g1_i9	1	p3	(TCC)6	18	33	50
		TRINITY_DN18730_c0_g1_i9	2	p2	(GA)16	32	1476	1507
		TRINITY_DN18777_c0_g1_i1	1	p1	(T)10	10	471	480
		TRINITY_DN18741_c0_g1_i9	1	p3	(TCT)5	15	743	757
		TRINITY_DN18741_c0_g1_i1	1	p3	(TCT)5	15	681	695
		TRINITY_DN18741_c0_g1_i15	1	c	(TTC)6tgagtattcctctaggtagctctagatcaagctctggtagctgcaatggag(CTT)6	87	724	810
		TRINITY_DN18741_c0_g1_i12	1	p3	(TTC)5	15	708	722
		TRINITY_DN18741_c0_g1_i5	1	c	(TTC)6tgagtattcctctaggtagctctagatcaagctctggtagctgcaatggag(CTT)6	87	786	872
		TRINITY_DN18741_c0_g1_i4	1	p3	(TTC)5	15	770	784
		TRINITY_DN18729_c0_g1_i4	1	p3	(CTC)5	15	148	162
		TRINITY_DN18792_c0_g1_i3	1	p2	(CT)6	12	809	820
		TRINITY_DN18706_c0_g1_i3	1	p2	(GT)6	12	3110	3121
		TRINITY_DN18706_c0_g1_i6	1	p2	(CG)6	12	305	316
		TRINITY_DN18706_c0_g1_i6	2	p3	(AAT)5	15	1103	1117
		TRINITY_DN18706_c0_g1_i1	1	p2	(GT)6	12	3146	3157
		TRINITY_DN18706_c0_g1_i11	1	p2	(GT)6	12	3112	3123
		TRINITY_DN18706_c0_g1_i11	2	p3	(AAT)5	15	4203	4217
		TRINITY_DN18719_c1_g1_i10	1	p2	(AT)7	14	1099	1112
		TRINITY_DN18703_c0_g1_i10	1	p2	(CT)7	14	369	382
		TRINITY_DN18776_c0_g1_i4	1	p1	(T)10	10	1108	1117
		TRINITY_DN18780_c0_g2_i2	1	p1	(A)12	12	35	46
		TRINITY_DN18780_c0_g2_i1	1	p1	(A)12	12	35	46
		TRINITY_DN18723_c0_g1_i1	1	p2	(GT)8	16	212	227
		TRINITY_DN18770_c0_g2_i7	1	p2	(TG)6	12	2958	2969
		TRINITY_DN18711_c0_g1_i10	1	p2	(CT)6	12	537	548
		TRINITY_DN18711_c0_g1_i10	2	p3	(GGC)5	15	669	683
		TRINITY_DN18711_c0_g1_i8	1	p2	(GC)11	22	1336	1357
		TRINITY_DN18711_c0_g1_i2	1	p2	(GC)11	22	501	522
		TRINITY_DN18711_c0_g1_i14	1	p2	(CT)6	12	537	548
		TRINITY_DN18711_c0_g1_i17	1	p2	(CT)6	12	537	548
		TRINITY_DN18711_c0_g1_i4	1	p3	(GGC)5	15	669	683
		TRINITY_DN18711_c0_g1_i23	1	p2	(CT)6	12	537	548
		TRINITY_DN18711_c0_g1_i23	2	p3	(GGC)5	15	669	683
		TRINITY_DN18711_c0_g1_i19	1	p2	(GC)11	22	273	294
		TRINITY_DN18766_c1_g1_i1	1	p2	(CT)7	14	31	44
		TRINITY_DN18766_c1_g1_i5	1	p3	(TAT)5	15	135	149
		TRINITY_DN18782_c0_g1_i1	1	p2	(AG)6	12	235	246
		TRINITY_DN18726_c0_g1_i4	1	c	(TC)6ccgctctgctggtcggcgagaggcagcctgccatgtgggcctcgccggggaggctgccggcgat(GGA)5	91	179	269
		TRINITY_DN18726_c0_g1_i7	1	c	(TC)6ccgctctgctggtcggcgagaggcagcctgccatgtgggcctcgccggggaggctgccggcgat(GGA)5	91	179	269
		TRINITY_DN18726_c0_g1_i2	1	p3	(GGA)5	15	262	276
		TRINITY_DN22802_c2_g1_i2	1	p2	(AG)6	12	69	80
		TRINITY_DN22802_c4_g1_i3	1	p2	(TC)6	12	228	239
		TRINITY_DN22802_c4_g1_i1	1	p2	(TC)6	12	228	239
		TRINITY_DN22801_c0_g5_i1	1	p3	(CGA)5	15	59	73
		TRINITY_DN22843_c0_g1_i3	1	p1	(A)11	11	239	249
		TRINITY_DN22818_c0_g1_i6	1	p3	(GAC)5	15	579	593
		TRINITY_DN22818_c0_g1_i2	1	p3	(GAG)5	15	420	434
		TRINITY_DN22818_c0_g1_i5	1	p3	(GAG)5	15	670	684
		TRINITY_DN22818_c0_g1_i1	1	p3	(GAC)5	15	440	454
		TRINITY_DN22895_c0_g1_i1	1	p2	(TC)7	14	251	264
		TRINITY_DN22850_c0_g3_i1	1	p1	(A)10	10	275	284
		TRINITY_DN22804_c0_g1_i2	1	p3	(AGC)5	15	511	525
		TRINITY_DN22804_c0_g1_i4	1	p3	(CGG)5	15	359	373
		TRINITY_DN22804_c0_g1_i4	2	p3	(CAG)5	15	519	533
		TRINITY_DN22804_c0_g1_i5	1	p3	(AGC)7	21	517	537
		TRINITY_DN22876_c0_g1_i1	1	p1	(T)11	11	776	786
		TRINITY_DN22873_c1_g1_i3	1	p1	(T)10	10	2371	2380
		TRINITY_DN22864_c0_g1_i4	1	p2	(CT)7	14	475	488
		TRINITY_DN22864_c0_g1_i2	1	p2	(CT)7	14	251	264
		TRINITY_DN22864_c0_g1_i7	1	p2	(CT)7	14	1318	1331
		TRINITY_DN22820_c0_g1_i4	1	p3	(CCT)7	21	63	83
		TRINITY_DN22820_c0_g1_i1	1	p3	(CCT)7	21	63	83
		TRINITY_DN22803_c0_g1_i1	1	p1	(T)10	10	1443	1452
		TRINITY_DN22829_c0_g3_i2	1	p3	(GGC)5	15	209	223
		TRINITY_DN22829_c0_g3_i1	1	p3	(GGC)5	15	212	226
		TRINITY_DN22816_c0_g1_i2	1	p3	(GCG)5	15	231	245
		TRINITY_DN22807_c1_g1_i9	1	p4	(TATC)6	24	48	71
		TRINITY_DN22825_c0_g1_i2	1	p2	(GC)7	14	283	296
		TRINITY_DN22867_c0_g1_i2	1	p1	(A)10	10	2709	2718
		TRINITY_DN22845_c1_g1_i6	1	p1	(T)10	10	2698	2707
		TRINITY_DN22845_c1_g1_i5	1	p1	(T)10	10	2881	2890
		TRINITY_DN22845_c1_g1_i8	1	p1	(T)10	10	2881	2890
		TRINITY_DN22835_c0_g1_i4	1	p1	(T)11	11	1680	1690
		TRINITY_DN22835_c0_g1_i1	1	p1	(T)11	11	1680	1690
		TRINITY_DN22835_c0_g1_i8	1	p1	(T)11	11	1680	1690
		TRINITY_DN22835_c0_g1_i5	1	p1	(T)11	11	1680	1690
		TRINITY_DN22835_c0_g1_i3	1	p1	(T)11	11	1680	1690
		TRINITY_DN22835_c0_g1_i2	1	p1	(T)11	11	1680	1690
		TRINITY_DN22835_c1_g2_i1	1	p3	(ATT)8	24	51	74
		TRINITY_DN22838_c1_g1_i1	1	p3	(TCC)5	15	42	56
		TRINITY_DN22854_c0_g2_i1	1	p3	(GAT)8	24	1105	1128
		TRINITY_DN60428_c0_g1_i7	1	p3	(TCT)5	15	287	301
		TRINITY_DN60484_c0_g1_i7	1	p1	(A)10	10	1305	1314
		TRINITY_DN60456_c1_g1_i7	1	p2	(TG)9	18	987	1004
		TRINITY_DN60442_c0_g1_i3	1	p2	(TG)6	12	89	100
		TRINITY_DN60442_c0_g1_i2	1	p2	(TG)6	12	89	100
		TRINITY_DN60442_c0_g1_i1	1	p2	(TG)6	12	89	100
		TRINITY_DN60410_c0_g1_i6	1	p1	(T)10	10	537	546
		TRINITY_DN60410_c0_g1_i2	1	p1	(T)10	10	652	661
		TRINITY_DN84315_c0_g1_i2	1	p3	(TCG)5	15	114	128
		TRINITY_DN84315_c0_g1_i1	1	p3	(TCG)5	15	114	128
		TRINITY_DN84315_c1_g1_i1	1	p3	(CGA)5	15	245	259
		TRINITY_DN84368_c0_g1_i1	1	p3	(GGC)5	15	232	246
		TRINITY_DN3051_c0_g1_i3	1	p2	(TG)6	12	994	1005
		TRINITY_DN3051_c0_g1_i9	1	p2	(TG)6	12	979	990
		TRINITY_DN3030_c0_g1_i4	1	p4	(CTGT)6	24	2010	2033
		TRINITY_DN3030_c0_g1_i1	1	p4	(CTGT)6	24	2004	2027
		TRINITY_DN3054_c0_g1_i1	1	p3	(CTC)8	24	247	270
		TRINITY_DN3054_c0_g1_i2	1	c	(CT)7cctcgccct(CTC)6	41	221	261
		TRINITY_DN3054_c0_g1_i3	1	p3	(CTC)5	15	244	258
		TRINITY_DN3025_c0_g1_i4	1	p3	(ACG)5	15	291	305
		TRINITY_DN3025_c0_g1_i7	1	p3	(ACG)5	15	291	305
		TRINITY_DN3025_c0_g1_i6	1	p3	(ACG)5	15	291	305
		TRINITY_DN3025_c0_g1_i5	1	p3	(ACG)5	15	291	305
		TRINITY_DN3025_c0_g1_i2	1	p3	(CCG)8	24	63	86
		TRINITY_DN3041_c0_g1_i6	1	p2	(CT)6	12	50	61
		TRINITY_DN3099_c3_g1_i1	1	p3	(GGC)6	18	15	32
		TRINITY_DN3016_c0_g1_i11	1	p2	(GA)6	12	380	391
		TRINITY_DN3016_c0_g1_i2	1	p2	(GA)6	12	380	391
		TRINITY_DN3016_c0_g1_i10	1	p1	(T)10	10	2626	2635
		TRINITY_DN3017_c0_g1_i6	1	p2	(CG)6	12	113	124
		TRINITY_DN3017_c0_g1_i4	1	p2	(CG)6	12	113	124
		TRINITY_DN3017_c0_g1_i2	1	p2	(CG)6	12	113	124
		TRINITY_DN3077_c0_g1_i4	1	p3	(TCC)5	15	33	47
		TRINITY_DN3077_c0_g1_i3	1	p3	(TCC)5	15	33	47
		TRINITY_DN3077_c0_g1_i5	1	p3	(TCC)5	15	33	47
		TRINITY_DN3077_c0_g1_i1	1	p3	(TCC)5	15	33	47
		TRINITY_DN3077_c0_g1_i2	1	p3	(TCC)5	15	33	47
		TRINITY_DN3077_c0_g2_i1	1	p3	(CGC)5	15	28	42
		TRINITY_DN3046_c0_g1_i7	1	p3	(CGC)5	15	133	147
		TRINITY_DN3046_c0_g1_i2	1	c	(CCG)6cgccgcccgtctcgcccgccggcttgtcctccctccacctccccagcgaagcgccggt(CGC)5	91	65	155
		TRINITY_DN3046_c0_g1_i4	1	p3	(CGC)5	15	168	182
		TRINITY_DN3046_c0_g1_i10	1	p3	(CGC)5	15	168	182
		TRINITY_DN3046_c0_g1_i1	1	p3	(CGC)5	15	133	147
		TRINITY_DN3046_c0_g1_i9	1	p3	(CGC)5	15	168	182
		TRINITY_DN3046_c0_g1_i6	1	p3	(CGC)5	15	168	182
		TRINITY_DN3046_c0_g1_i8	1	p3	(CGC)5	15	168	182
		TRINITY_DN3009_c0_g1_i2	1	p3	(TTG)8	24	1818	1841
		TRINITY_DN3009_c0_g1_i7	1	p3	(TTG)8	24	2214	2237
		TRINITY_DN3009_c0_g1_i10	1	p3	(TTG)8	24	2214	2237
		TRINITY_DN3009_c0_g1_i4	1	p3	(TTG)8	24	2068	2091
		TRINITY_DN3009_c0_g1_i1	1	p3	(TTG)8	24	1818	1841
		TRINITY_DN3009_c0_g1_i5	1	p3	(TTG)8	24	1964	1987
		TRINITY_DN3009_c0_g1_i3	1	p3	(TTG)8	24	1964	1987
		TRINITY_DN3009_c0_g1_i6	1	p3	(TTG)8	24	1964	1987
		TRINITY_DN3005_c1_g1_i6	1	p2	(TG)6	12	530	541
		TRINITY_DN3047_c0_g1_i7	1	p3	(CCG)5	15	71	85
		TRINITY_DN3047_c0_g1_i2	1	p3	(CCG)5	15	71	85
		TRINITY_DN3047_c0_g1_i9	1	p3	(CCG)5	15	71	85
		TRINITY_DN3031_c0_g2_i1	1	p3	(GGC)5	15	749	763
		TRINITY_DN3052_c0_g1_i15	1	c	(GCA)5gatgatgcagcaggctctgctcatgcaccagcac(CAG)5	64	365	428
		TRINITY_DN3052_c0_g1_i10	1	p3	(GCA)5	15	365	379
		TRINITY_DN3052_c0_g1_i11	1	p3	(GCA)5	15	365	379
		TRINITY_DN3052_c0_g1_i8	1	c	(GCA)5gatgatgcagcaggcgctgctcatgcaccac(CAG)6	64	391	454
		TRINITY_DN3052_c0_g1_i3	1	p1	(T)10	10	192	201
		TRINITY_DN3052_c0_g1_i3	2	c	(GCA)5gatgatgcagcaggctctgctcatgcaccagcac(CAG)5	64	396	459
		TRINITY_DN3052_c0_g1_i2	1	p1	(T)10	10	192	201
		TRINITY_DN3052_c0_g1_i2	2	c	(GCA)5gatgatgcagcaggctctgctcatgcaccagcac(CAG)5	64	396	459
		TRINITY_DN3052_c1_g1_i1	1	p3	(CAG)6	18	46	63
		TRINITY_DN3022_c0_g1_i7	1	p3	(AGC)5	15	7835	7849
		TRINITY_DN3022_c0_g1_i6	1	p3	(AGC)5	15	7835	7849
		TRINITY_DN3076_c0_g1_i5	1	p3	(TTG)5	15	1245	1259
		TRINITY_DN3076_c0_g1_i7	1	p3	(TTG)5	15	1141	1155
		TRINITY_DN3076_c0_g1_i1	1	p3	(GCA)6	18	77	94
		TRINITY_DN3076_c0_g1_i8	1	p3	(TTG)5	15	1141	1155
		TRINITY_DN3076_c0_g4_i2	1	p3	(GCA)6	18	77	94
		TRINITY_DN3076_c0_g4_i1	1	p3	(GCA)6	18	77	94
		TRINITY_DN3015_c0_g1_i2	1	p1	(A)13	13	100	112
		TRINITY_DN3015_c0_g1_i9	1	p1	(A)13	13	100	112
		TRINITY_DN3027_c0_g1_i9	1	p2	(CT)6	12	1712	1723
		TRINITY_DN3027_c0_g1_i5	1	p2	(CT)6	12	1449	1460
		TRINITY_DN3027_c0_g1_i6	1	p2	(CT)6	12	1720	1731
		TRINITY_DN3027_c0_g1_i7	1	p3	(CCG)6	18	239	256
		TRINITY_DN3027_c0_g1_i7	2	p2	(CT)6	12	1721	1732
		TRINITY_DN3091_c0_g1_i3	1	p1	(T)11	11	1832	1842
		TRINITY_DN3091_c0_g1_i1	1	p1	(T)11	11	1831	1841
		TRINITY_DN3068_c0_g1_i12	1	p2	(CT)6	12	173	184
		TRINITY_DN3068_c0_g1_i10	1	p2	(TC)7	14	170	183
		TRINITY_DN3068_c0_g1_i6	1	p2	(CT)7	14	171	184
		TRINITY_DN3068_c0_g1_i5	1	p2	(CT)7	14	171	184
		TRINITY_DN3068_c0_g1_i11	1	p2	(TC)7	14	170	183
		TRINITY_DN3068_c3_g1_i1	1	p3	(TGC)6	18	342	359
		TRINITY_DN3012_c0_g1_i15	1	p2	(GT)6	12	1876	1887
		TRINITY_DN3012_c0_g1_i13	1	p2	(GT)6	12	1899	1910
		TRINITY_DN3012_c0_g1_i2	1	p2	(GT)6	12	1876	1887
		TRINITY_DN3012_c0_g1_i3	1	p2	(GT)6	12	906	917
		TRINITY_DN3012_c0_g1_i10	1	p2	(GT)6	12	816	827
		TRINITY_DN3012_c0_g1_i1	1	p2	(GT)6	12	906	917
		TRINITY_DN3012_c0_g1_i16	1	p2	(GT)6	12	1899	1910
		TRINITY_DN3012_c0_g1_i14	1	p2	(GT)6	12	1876	1887
		TRINITY_DN3012_c0_g1_i7	1	p2	(GT)6	12	1899	1910
		TRINITY_DN3048_c0_g1_i2	1	p3	(CCT)5	15	21	35
		TRINITY_DN3029_c0_g1_i2	1	p3	(CCT)6	18	44	61
		TRINITY_DN3029_c0_g1_i4	1	p3	(CCT)6	18	44	61
		TRINITY_DN3080_c0_g1_i2	1	p3	(CCG)5	15	650	664
		TRINITY_DN3080_c1_g2_i4	1	p3	(CCG)7	21	43	63
		TRINITY_DN3080_c1_g2_i4	2	p3	(GAT)6	18	1230	1247
		TRINITY_DN3080_c1_g2_i4	3	p2	(AG)10	20	3233	3252
		TRINITY_DN3080_c1_g2_i8	1	p3	(CCG)7	21	43	63
		TRINITY_DN3080_c1_g2_i8	2	p3	(GAT)6	18	1230	1247
		TRINITY_DN3080_c1_g2_i8	3	p1	(A)10	10	3316	3325
		TRINITY_DN3080_c1_g2_i7	1	p3	(CCG)7	21	43	63
		TRINITY_DN3080_c1_g2_i1	1	p3	(GAT)6	18	128	145
		TRINITY_DN3080_c1_g2_i1	2	c	(AG)10cttaggtctagggtttgtttttgtaatcctttattaataggaagggcgtccttgtattgattcattcccaacaagaat(A)10	108	2131	2238
		TRINITY_DN3080_c1_g2_i2	1	p3	(GAT)6	18	128	145
		TRINITY_DN3080_c1_g2_i6	1	p3	(GAT)6	18	128	145
		TRINITY_DN3080_c1_g2_i6	2	p1	(A)10	10	2214	2223
		TRINITY_DN3080_c3_g1_i1	1	p3	(GAT)5	15	221	235
		TRINITY_DN3080_c3_g1_i2	1	p3	(GAT)5	15	222	236
		TRINITY_DN3034_c0_g1_i1	1	p3	(CTC)5	15	147	161
		TRINITY_DN3065_c1_g1_i1	1	p3	(GCT)6	18	78	95
		TRINITY_DN3065_c1_g1_i4	1	p3	(GCT)6	18	146	163
		TRINITY_DN3000_c0_g1_i7	1	p1	(A)10	10	2481	2490
		TRINITY_DN3000_c0_g1_i3	1	p1	(A)10	10	3434	3443
		TRINITY_DN3024_c0_g1_i3	1	p3	(CGG)8	24	44	67
		TRINITY_DN3024_c0_g1_i4	1	p3	(CGG)8	24	44	67
		TRINITY_DN3024_c0_g1_i6	1	p3	(CGG)8	24	44	67
		TRINITY_DN3024_c0_g1_i1	1	p3	(CGG)8	24	44	67
		TRINITY_DN3024_c0_g1_i5	1	p3	(CGG)8	24	44	67
		TRINITY_DN3093_c0_g2_i1	1	p3	(GCC)5	15	566	580
		TRINITY_DN3002_c0_g1_i7	1	c	(CT)9ttctc(TG)8	39	2220	2258
		TRINITY_DN3002_c0_g1_i18	1	c	(CT)9ttctc(TG)9	41	2199	2239
		TRINITY_DN3002_c0_g1_i4	1	p3	(GTC)5	15	448	462
		TRINITY_DN3002_c0_g1_i6	1	c	(CT)9ttctc(TG)11	45	2530	2574
		TRINITY_DN3002_c1_g1_i1	1	p2	(TC)8	16	51	66
		TRINITY_DN3081_c0_g1_i1	1	p3	(CGG)5	15	625	639
		TRINITY_DN3081_c1_g1_i2	1	p2	(GC)6	12	411	422
		TRINITY_DN58607_c0_g1_i2	1	p1	(A)10	10	22	31
		TRINITY_DN58607_c0_g1_i1	1	p1	(A)10	10	22	31
		TRINITY_DN58665_c0_g1_i5	1	p1	(A)10	10	145	154
		TRINITY_DN58665_c0_g1_i6	1	p1	(A)10	10	145	154
		TRINITY_DN58616_c0_g1_i2	1	p1	(T)10	10	2319	2328
		TRINITY_DN58642_c0_g2_i1	1	p1	(A)11	11	166	176
		TRINITY_DN16145_c0_g1_i8	1	p2	(TG)6	12	3172	3183
		TRINITY_DN16145_c0_g1_i2	1	p2	(TG)6	12	3217	3228
		TRINITY_DN16145_c0_g1_i11	1	p2	(TG)6	12	2439	2450
		TRINITY_DN16101_c2_g1_i2	1	p3	(AGC)6	18	61	78
		TRINITY_DN16199_c0_g1_i1	1	p3	(CCG)5	15	117	131
		TRINITY_DN16139_c1_g1_i11	1	p2	(TG)7	14	215	228
		TRINITY_DN16139_c1_g1_i17	1	p2	(TG)7	14	105	118
		TRINITY_DN16151_c0_g1_i3	1	p2	(GA)7	14	26	39
		TRINITY_DN16155_c0_g1_i7	1	p6	(GACTAT)7	42	1029	1070
		TRINITY_DN16155_c0_g1_i8	1	p6	(GACTAT)7	42	317	358
		TRINITY_DN16155_c0_g1_i6	1	p6	(GACTAT)7	42	1013	1054
		TRINITY_DN16155_c0_g1_i15	1	p6	(GACTAT)7	42	1487	1528
		TRINITY_DN16155_c0_g1_i11	1	p6	(GACTAT)7	42	2549	2590
		TRINITY_DN16155_c0_g1_i1	1	p6	(GACTAT)7	42	1487	1528
		TRINITY_DN16179_c0_g1_i1	1	p3	(TAG)6	18	326	343
		TRINITY_DN16149_c0_g1_i1	1	p3	(CCG)5	15	86	100
		TRINITY_DN16125_c0_g1_i9	1	p2	(AT)6	12	2488	2499
		TRINITY_DN16125_c0_g1_i13	1	p2	(AT)6	12	2448	2459
		TRINITY_DN16117_c0_g1_i1	1	p1	(T)10	10	1063	1072
		TRINITY_DN16117_c0_g1_i12	1	p1	(T)10	10	1130	1139
		TRINITY_DN16117_c0_g1_i9	1	p1	(T)10	10	983	992
		TRINITY_DN16180_c0_g1_i5	1	p3	(GGT)6	18	217	234
		TRINITY_DN16180_c0_g1_i4	1	p3	(GGT)6	18	217	234
		TRINITY_DN16160_c0_g1_i2	1	p3	(CGA)7	21	244	264
		TRINITY_DN16134_c0_g2_i1	1	p3	(TGA)5	15	232	246
		TRINITY_DN16134_c0_g2_i2	1	p3	(TGA)5	15	196	210
		TRINITY_DN16181_c0_g1_i4	1	p3	(CGG)5	15	235	249
		TRINITY_DN16181_c0_g1_i5	1	p3	(CGG)5	15	235	249
		TRINITY_DN16181_c0_g1_i2	1	p3	(CGG)5	15	235	249
		TRINITY_DN16181_c0_g1_i1	1	p3	(CCG)5	15	123	137
		TRINITY_DN16111_c0_g1_i4	1	p3	(ATT)5	15	83	97
		TRINITY_DN16111_c0_g1_i9	1	p3	(ATT)5	15	83	97
		TRINITY_DN16111_c0_g2_i1	1	p1	(A)10	10	2442	2451
		TRINITY_DN16111_c0_g6_i1	1	c	(CTT)5(ATT)6ctagc(CTT)6	56	387	442
		TRINITY_DN16140_c0_g1_i5	1	p3	(GCC)5	15	42	56
		TRINITY_DN16140_c0_g1_i13	1	p3	(GCC)5	15	42	56
		TRINITY_DN16140_c0_g1_i9	1	p3	(GCC)5	15	42	56
		TRINITY_DN16165_c0_g1_i8	1	p2	(TC)6	12	1522	1533
		TRINITY_DN16165_c0_g1_i2	1	p2	(TC)6	12	1922	1933
		TRINITY_DN16165_c0_g1_i18	1	p2	(TC)6	12	2414	2425
		TRINITY_DN16167_c0_g1_i1	1	c	(CTC)5cgccgccgcggcgtccttcaacggctgggccgacctccccgccgacacggacctccccttcagcctcccgcagcagtccctcgccgccgccccg(CTC)5	124	275	398
		TRINITY_DN16167_c0_g1_i6	1	p3	(CTC)5	15	284	298
		TRINITY_DN16167_c0_g1_i2	1	p3	(CTC)5	15	167	181
		TRINITY_DN16167_c0_g2_i1	1	p1	(C)13	13	220	232
		TRINITY_DN16108_c0_g3_i1	1	p1	(T)10	10	613	622
		TRINITY_DN16192_c0_g1_i4	1	p4	(GAAA)6	24	387	410
		TRINITY_DN16192_c0_g1_i5	1	p4	(AGAA)9	36	159	194
		TRINITY_DN16131_c0_g1_i3	1	p2	(CT)6	12	55	66
		TRINITY_DN16189_c0_g2_i2	1	p3	(GTG)5	15	305	319
		TRINITY_DN16130_c0_g3_i2	1	p2	(AC)6	12	105	116
		TRINITY_DN16130_c0_g3_i2	2	p4	(TTCT)5	20	1041	1060
		TRINITY_DN16130_c0_g3_i4	1	p4	(TTCT)5	20	957	976
		TRINITY_DN16169_c0_g2_i2	1	p1	(A)10	10	1094	1103
		TRINITY_DN16169_c0_g2_i6	1	p1	(T)10	10	1702	1711
		TRINITY_DN16115_c0_g1_i11	1	p2	(TC)12	24	190	213
		TRINITY_DN16115_c0_g1_i14	1	p2	(TC)17	34	190	223
		TRINITY_DN16115_c0_g1_i17	1	p2	(TC)17	34	190	223
		TRINITY_DN16115_c0_g1_i13	1	p2	(TC)17	34	190	223
		TRINITY_DN16128_c0_g1_i15	1	p3	(GGA)6	18	207	224
		TRINITY_DN16128_c0_g1_i8	1	p3	(GGA)5	15	231	245
		TRINITY_DN16128_c0_g1_i14	1	p3	(GGA)6	18	207	224
		TRINITY_DN16128_c0_g1_i9	1	c	(GGA)6cgcgtacgaggacgagat(GGA)6	54	207	260
		TRINITY_DN16128_c0_g1_i3	1	c	(GGA)6cgcgtacgaggacgagat(GGA)6	54	207	260
		TRINITY_DN16128_c0_g1_i16	1	p3	(GGA)5	15	231	245
		TRINITY_DN16128_c0_g1_i5	1	c	(GGA)6cgcgtacgaggacgagat(GGA)6	54	207	260
		TRINITY_DN16128_c0_g1_i6	1	p3	(GGA)5	15	231	245
		TRINITY_DN16128_c0_g1_i1	1	p3	(GGA)5	15	231	245
		TRINITY_DN16128_c0_g1_i7	1	p3	(GGA)5	15	231	245
		TRINITY_DN16106_c1_g1_i2	1	p1	(A)12	12	1677	1688
		TRINITY_DN16161_c0_g1_i2	1	p3	(GCA)7	21	410	430
		TRINITY_DN16197_c0_g1_i18	1	p1	(T)10	10	1380	1389
		TRINITY_DN16197_c0_g1_i8	1	p1	(T)10	10	1015	1024
		TRINITY_DN16197_c0_g1_i17	1	p1	(T)10	10	1348	1357
		TRINITY_DN94881_c0_g1_i1	1	p2	(AG)8	16	75	90
		TRINITY_DN94808_c0_g1_i2	1	p1	(A)11	11	260	270
		TRINITY_DN94808_c0_g1_i1	1	p1	(A)11	11	260	270
		TRINITY_DN94871_c0_g4_i1	1	p4	(TTTG)6	24	653	676
		TRINITY_DN94871_c0_g4_i2	1	p4	(TTTG)6	24	259	282
		TRINITY_DN93836_c0_g1_i1	1	p3	(CGC)6	18	296	313
		TRINITY_DN93899_c2_g2_i4	1	p3	(AAC)5	15	241	255
		TRINITY_DN93831_c0_g1_i9	1	p3	(GCG)5	15	1908	1922
		TRINITY_DN93892_c1_g2_i1	1	p2	(GT)17	34	449	482
		TRINITY_DN93892_c1_g2_i2	1	p2	(GT)17	34	567	600
		TRINITY_DN93832_c0_g2_i1	1	p1	(A)11	11	798	808
		TRINITY_DN93868_c0_g1_i2	1	p2	(TG)7	14	505	518
		TRINITY_DN93817_c0_g1_i1	1	p3	(GAG)5	15	181	195
		TRINITY_DN82938_c0_g1_i1	1	p2	(AT)6	12	616	627
		TRINITY_DN82914_c0_g2_i1	1	p2	(TC)6	12	690	701
		TRINITY_DN82970_c0_g1_i4	1	p1	(A)12	12	1758	1769
		TRINITY_DN82970_c0_g1_i5	1	p1	(A)12	12	905	916
		TRINITY_DN82970_c0_g1_i2	1	p1	(A)12	12	1745	1756
		TRINITY_DN82970_c0_g1_i1	1	p1	(A)12	12	1749	1760
		TRINITY_DN82927_c0_g1_i6	1	p4	(CCGT)5	20	281	300
		TRINITY_DN82957_c1_g1_i1	1	p3	(GCA)5	15	50	64
		TRINITY_DN49664_c0_g1_i1	1	p2	(AG)6	12	24	35
		TRINITY_DN49695_c0_g1_i1	1	p5	(TCTTT)5	25	411	435
		TRINITY_DN49666_c0_g1_i1	1	p2	(TC)18	36	845	880
		TRINITY_DN49653_c0_g1_i7	1	p3	(TCT)5	15	491	505
		TRINITY_DN49690_c1_g1_i1	1	p3	(GGA)5	15	387	401
		TRINITY_DN49681_c0_g2_i1	1	p4	(TCTT)5	20	516	535
		TRINITY_DN49670_c0_g1_i3	1	c	(GA)9gcgagt(GA)7	38	62	99
		TRINITY_DN49670_c0_g1_i1	1	p2	(AG)21	42	12	53
		TRINITY_DN49640_c0_g1_i6	1	p1	(T)10	10	3790	3799
		TRINITY_DN49640_c0_g1_i5	1	p1	(T)10	10	3986	3995
		TRINITY_DN49640_c0_g1_i11	1	p1	(T)10	10	3858	3867
		TRINITY_DN49608_c0_g1_i1	1	p1	(T)12	12	564	575
		TRINITY_DN49693_c0_g1_i1	1	p3	(CCT)6	18	55	72
		TRINITY_DN49644_c0_g2_i1	1	p1	(T)10	10	209	218
		TRINITY_DN49645_c0_g1_i2	1	p2	(CA)10	20	118	137
		TRINITY_DN49605_c0_g1_i9	1	p1	(A)10	10	951	960
		TRINITY_DN49685_c0_g1_i1	1	p2	(TA)7	14	38	51
		TRINITY_DN74433_c0_g1_i3	1	p3	(CGC)6	18	29	46
		TRINITY_DN74433_c0_g1_i1	1	p3	(CGC)6	18	29	46
		TRINITY_DN74473_c1_g1_i2	1	p4	(GATG)6	24	213	236
		TRINITY_DN74468_c0_g2_i1	1	p3	(ACA)7	21	165	185
		TRINITY_DN74454_c0_g1_i1	1	p3	(AGG)6	18	722	739
		TRINITY_DN74407_c0_g1_i1	1	p2	(AT)6	12	721	732
		TRINITY_DN74459_c0_g1_i1	1	p2	(GT)7	14	86	99
		TRINITY_DN74418_c0_g2_i1	1	p3	(CCT)5	15	213	227
		TRINITY_DN77460_c0_g1_i2	1	p2	(CA)6	12	378	389
		TRINITY_DN77499_c0_g1_i2	1	p1	(T)11	11	120	130
		TRINITY_DN77412_c0_g1_i1	1	p2	(CT)7	14	332	345
		TRINITY_DN77412_c0_g1_i4	1	p1	(T)10	10	1056	1065
		TRINITY_DN77412_c0_g1_i2	1	p2	(CT)7	14	271	284
		TRINITY_DN77412_c0_g1_i2	2	p1	(T)10	10	995	1004
		TRINITY_DN77412_c0_g1_i3	1	p2	(CT)7	14	271	284
		TRINITY_DN77452_c0_g1_i1	1	p1	(A)11	11	245	255
		TRINITY_DN77452_c0_g1_i3	1	p1	(A)10	10	248	257
		TRINITY_DN77452_c0_g1_i2	1	p1	(A)11	11	245	255
		TRINITY_DN77452_c0_g1_i6	1	p1	(A)10	10	249	258
		TRINITY_DN77452_c0_g1_i5	1	p1	(A)10	10	248	257
		TRINITY_DN77452_c0_g1_i4	1	p1	(A)10	10	248	257
		TRINITY_DN87856_c0_g1_i1	1	p3	(TCA)5	15	91	105
		TRINITY_DN87848_c0_g1_i1	1	p3	(CTT)5	15	54	68
		TRINITY_DN87843_c1_g1_i1	1	p1	(T)17	17	19	35
		TRINITY_DN87851_c1_g1_i1	1	p3	(TTG)5	15	380	394
		TRINITY_DN87851_c2_g2_i1	1	p3	(TTG)5	15	142	156
		TRINITY_DN87865_c0_g1_i1	1	p1	(T)10	10	145	154
		TRINITY_DN58075_c0_g1_i1	1	p3	(CCG)5	15	23	37
		TRINITY_DN58055_c0_g2_i2	1	p3	(CGG)5	15	178	192
		TRINITY_DN58027_c0_g1_i1	1	p3	(CGA)5	15	128	142
		TRINITY_DN58072_c0_g1_i3	1	p3	(TCG)5	15	295	309
		TRINITY_DN58072_c0_g1_i7	1	p3	(TCG)5	15	397	411
		TRINITY_DN58072_c0_g1_i5	1	p3	(TCG)5	15	287	301
		TRINITY_DN58072_c1_g1_i2	1	p3	(CGA)5	15	192	206
		TRINITY_DN58086_c1_g3_i1	1	p1	(T)10	10	823	832
		TRINITY_DN58092_c0_g1_i2	1	p2	(TG)7	14	613	626
		TRINITY_DN58054_c0_g1_i2	1	p3	(TGA)5	15	1624	1638
		TRINITY_DN58068_c0_g1_i3	1	p1	(C)27	27	233	259
		TRINITY_DN58047_c0_g1_i1	1	p2	(AT)6	12	1662	1673
		TRINITY_DN58019_c0_g1_i2	1	p3	(GCG)5	15	75	89
		TRINITY_DN2426_c0_g1_i1	1	p2	(GA)9	18	775	792
		TRINITY_DN2426_c0_g1_i4	1	p2	(GA)6	12	154	165
		TRINITY_DN2426_c0_g2_i2	1	p2	(CA)6	12	553	564
		TRINITY_DN2426_c0_g2_i1	1	p2	(TC)6	12	542	553
		TRINITY_DN2404_c1_g2_i2	1	p1	(A)29	29	49	77
		TRINITY_DN2404_c1_g2_i7	1	p1	(A)26	26	52	77
		TRINITY_DN2468_c0_g1_i3	1	p3	(GCA)5	15	632	646
		TRINITY_DN2468_c0_g1_i9	1	p3	(GCA)5	15	632	646
		TRINITY_DN2468_c0_g1_i7	1	p3	(GCA)5	15	602	616
		TRINITY_DN2468_c0_g1_i10	1	p3	(GCA)5	15	605	619
		TRINITY_DN2468_c0_g1_i12	1	p3	(GCA)5	15	605	619
		TRINITY_DN2418_c0_g1_i1	1	p3	(AGA)5	15	208	222
		TRINITY_DN2418_c0_g2_i2	1	p3	(TTC)5	15	647	661
		TRINITY_DN2418_c0_g2_i2	2	p2	(CT)8	16	947	962
		TRINITY_DN2418_c0_g2_i6	1	p3	(TTC)5	15	632	646
		TRINITY_DN2418_c0_g2_i6	2	p2	(CT)8	16	914	929
		TRINITY_DN2418_c0_g2_i3	1	p3	(TTC)5	15	647	661
		TRINITY_DN2418_c0_g2_i3	2	p2	(CT)8	16	929	944
		TRINITY_DN2490_c0_g1_i10	1	p2	(CT)7	14	18	31
		TRINITY_DN2490_c0_g1_i3	1	p2	(CT)7	14	18	31
		TRINITY_DN2490_c0_g1_i1	1	p2	(TC)7	14	19	32
		TRINITY_DN2447_c0_g3_i1	1	p3	(GCC)6	18	112	129
		TRINITY_DN2447_c1_g1_i2	1	p1	(A)10	10	1561	1570
		TRINITY_DN2406_c2_g1_i2	1	p4	(AAAG)8	32	1638	1669
		TRINITY_DN2406_c2_g1_i1	1	p1	(A)10	10	1505	1514
		TRINITY_DN2406_c2_g1_i1	2	p4	(AAAG)8	32	3076	3107
		TRINITY_DN2402_c0_g1_i2	1	c	(CCT)6aggtaccactactatagataatttcttgctcatcttcttccagttcctctatcatataccgtatacggatacggagaactaaattgtaccctccaattc(A)10	127	846	972
		TRINITY_DN2402_c0_g1_i4	1	p1	(A)10	10	974	983
		TRINITY_DN2402_c0_g1_i1	1	p3	(CCT)6	18	846	863
		TRINITY_DN2402_c0_g1_i3	1	p1	(A)10	10	966	975
		TRINITY_DN2402_c0_g1_i5	1	p3	(CCT)6	18	857	874
		TRINITY_DN2402_c1_g1_i1	1	p2	(CG)6	12	227	238
		TRINITY_DN2434_c0_g1_i7	1	p3	(CTC)7	21	99	119
		TRINITY_DN2434_c0_g1_i6	1	p5	(CCTCT)5	25	46	70
		TRINITY_DN2434_c0_g1_i4	1	p5	(CCTCT)5	25	46	70
		TRINITY_DN2434_c0_g1_i9	1	p5	(CCTCT)5	25	46	70
		TRINITY_DN2434_c1_g1_i1	1	p3	(CTC)8	24	212	235
		TRINITY_DN2455_c0_g1_i6	1	p3	(GAG)8	24	1500	1523
		TRINITY_DN2455_c0_g1_i10	1	p3	(GAG)5	15	1514	1528
		TRINITY_DN2455_c0_g1_i4	1	p3	(GAG)5	15	1500	1514
		TRINITY_DN2455_c0_g1_i1	1	p3	(GAG)8	24	1514	1537
		TRINITY_DN2455_c0_g1_i3	1	p3	(GAG)5	15	1287	1301
		TRINITY_DN2455_c1_g1_i5	1	p2	(TG)6	12	1599	1610
		TRINITY_DN2455_c1_g1_i9	1	p3	(AGG)7	21	46	66
		TRINITY_DN2455_c1_g1_i1	1	p3	(AGG)7	21	46	66
		TRINITY_DN2455_c1_g1_i11	1	p3	(AGG)7	21	46	66
		TRINITY_DN2455_c1_g1_i11	2	p2	(TG)6	12	1599	1610
		TRINITY_DN2455_c1_g1_i2	1	p3	(AGG)7	21	46	66
		TRINITY_DN2455_c1_g1_i8	1	c	(TG)8tatgtaaataa(GAG)5	42	1567	1608
		TRINITY_DN2479_c0_g1_i1	1	p1	(T)10	10	3526	3535
		TRINITY_DN2422_c0_g1_i4	1	p3	(TCC)5	15	123	137
		TRINITY_DN2422_c0_g1_i11	1	p3	(TCC)5	15	123	137
		TRINITY_DN2422_c0_g1_i5	1	p3	(TCC)5	15	123	137
		TRINITY_DN2422_c0_g1_i12	1	p3	(TCC)5	15	123	137
		TRINITY_DN2422_c0_g1_i1	1	p3	(TCC)5	15	123	137
		TRINITY_DN2422_c0_g1_i10	1	p3	(TCC)5	15	123	137
		TRINITY_DN2463_c0_g1_i11	1	p3	(CTC)5	15	210	224
		TRINITY_DN2463_c0_g1_i6	1	p3	(CTC)5	15	218	232
		TRINITY_DN2463_c0_g1_i5	1	p3	(CTC)5	15	210	224
		TRINITY_DN2463_c0_g1_i9	1	p3	(CTC)5	15	218	232
		TRINITY_DN2463_c0_g1_i4	1	p3	(CTC)5	15	218	232
		TRINITY_DN2469_c0_g1_i18	1	p3	(GCC)6	18	200	217
		TRINITY_DN2469_c0_g1_i2	1	p1	(T)10	10	139	148
		TRINITY_DN2469_c0_g1_i2	2	p1	(A)10	10	1577	1586
		TRINITY_DN2469_c0_g1_i10	1	p1	(T)10	10	139	148
		TRINITY_DN2469_c0_g1_i15	1	p3	(GCC)6	18	200	217
		TRINITY_DN2469_c0_g1_i7	1	p3	(GCC)6	18	200	217
		TRINITY_DN2469_c0_g1_i7	2	p1	(A)10	10	2195	2204
		TRINITY_DN2469_c0_g1_i16	1	p1	(T)10	10	139	148
		TRINITY_DN2469_c0_g1_i16	2	p1	(T)10	10	372	381
		TRINITY_DN2469_c0_g1_i4	1	p3	(GCC)6	18	200	217
		TRINITY_DN2469_c0_g1_i9	1	p3	(GCC)6	18	200	217
		TRINITY_DN2469_c0_g1_i13	1	p1	(T)10	10	139	148
		TRINITY_DN2469_c0_g1_i13	2	p1	(T)10	10	372	381
		TRINITY_DN2469_c0_g1_i8	1	p3	(GCC)6	18	200	217
		TRINITY_DN2498_c0_g1_i7	1	p1	(A)12	12	1230	1241
		TRINITY_DN2498_c0_g1_i1	1	p1	(A)12	12	1232	1243
		TRINITY_DN2465_c0_g1_i1	1	p3	(CGG)5	15	59	73
		TRINITY_DN2465_c0_g1_i2	1	p3	(CGG)5	15	59	73
		TRINITY_DN2430_c0_g1_i6	1	p3	(GGC)5	15	176	190
		TRINITY_DN2430_c0_g1_i1	1	p3	(GGC)5	15	176	190
		TRINITY_DN2430_c0_g1_i8	1	p3	(GGC)5	15	176	190
		TRINITY_DN2430_c0_g1_i4	1	p3	(GGC)5	15	176	190
		TRINITY_DN2436_c0_g1_i5	1	p3	(GCC)5	15	338	352
		TRINITY_DN2436_c0_g1_i9	1	p3	(GCC)5	15	268	282
		TRINITY_DN2436_c2_g1_i1	1	p3	(CCT)5	15	233	247
		TRINITY_DN2436_c2_g1_i3	1	p3	(CCT)5	15	233	247
		TRINITY_DN2436_c2_g1_i2	1	p3	(CCT)5	15	233	247
		TRINITY_DN2440_c0_g1_i4	1	p1	(T)10	10	1271	1280
		TRINITY_DN2440_c0_g1_i1	1	p1	(T)10	10	895	904
		TRINITY_DN2440_c0_g2_i1	1	p3	(TTG)8	24	987	1010
		TRINITY_DN2440_c0_g2_i3	1	p3	(TTG)5	15	1071	1085
		TRINITY_DN2489_c0_g1_i11	1	p1	(T)10	10	1674	1683
		TRINITY_DN2489_c0_g1_i10	1	p1	(T)10	10	1653	1662
		TRINITY_DN2486_c0_g1_i1	1	p2	(AT)8	16	1954	1969
		TRINITY_DN2486_c0_g1_i6	1	p2	(AT)8	16	1935	1950
		TRINITY_DN2486_c1_g2_i4	1	p3	(GGA)5	15	239	253
		TRINITY_DN2486_c1_g2_i3	1	p3	(GGA)5	15	239	253
		TRINITY_DN2486_c1_g2_i1	1	p3	(GGA)5	15	239	253
		TRINITY_DN2486_c1_g2_i2	1	p3	(GGA)5	15	239	253
		TRINITY_DN2415_c0_g1_i8	1	p1	(T)10	10	83	92
		TRINITY_DN2415_c0_g1_i3	1	p1	(T)10	10	83	92
		TRINITY_DN2415_c0_g1_i9	1	p1	(T)10	10	83	92
		TRINITY_DN2415_c0_g1_i9	2	p1	(T)10	10	1228	1237
		TRINITY_DN2421_c0_g1_i2	1	p3	(CCG)8	24	69	92
		TRINITY_DN2421_c0_g1_i6	1	p3	(CCG)8	24	69	92
		TRINITY_DN2421_c0_g1_i5	1	p3	(CCG)5	15	35	49
		TRINITY_DN2421_c0_g1_i3	1	p3	(CCG)5	15	35	49
		TRINITY_DN2438_c0_g1_i1	1	p1	(T)20	20	621	640
		TRINITY_DN2438_c0_g1_i8	1	c	(T)20(G)11	31	638	668
		TRINITY_DN2438_c0_g1_i2	1	p2	(AC)6	12	112	123
		TRINITY_DN2438_c0_g1_i4	1	p2	(AC)6	12	112	123
		TRINITY_DN2449_c0_g1_i4	1	p3	(CTC)5	15	41	55
		TRINITY_DN2449_c0_g1_i5	1	p3	(CTC)5	15	41	55
		TRINITY_DN2449_c0_g1_i8	1	p3	(CTC)5	15	41	55
		TRINITY_DN2449_c0_g1_i7	1	p3	(CTC)5	15	41	55
		TRINITY_DN2431_c0_g2_i3	1	p3	(AGC)5	15	126	140
		TRINITY_DN2431_c0_g2_i4	1	p3	(AGC)5	15	126	140
		TRINITY_DN2456_c0_g1_i5	1	p1	(T)10	10	1757	1766
		TRINITY_DN2456_c0_g1_i6	1	p1	(T)10	10	1757	1766
		TRINITY_DN2405_c0_g1_i3	1	p2	(GT)6	12	4607	4618
		TRINITY_DN2405_c0_g1_i1	1	p2	(GT)6	12	4355	4366
		TRINITY_DN2405_c0_g2_i3	1	p2	(TG)6	12	3977	3988
		TRINITY_DN2405_c0_g2_i4	1	p2	(TG)6	12	3977	3988
		TRINITY_DN2405_c0_g2_i2	1	p2	(TG)6	12	3977	3988
		TRINITY_DN2453_c0_g2_i2	1	p3	(CCG)7	21	39	59
		TRINITY_DN2453_c0_g2_i2	2	p3	(CGG)5	15	316	330
		TRINITY_DN2453_c0_g2_i1	1	p3	(CCG)7	21	39	59
		TRINITY_DN2453_c0_g2_i1	2	p3	(CGG)5	15	316	330
		TRINITY_DN2453_c0_g2_i4	1	p3	(CCG)7	21	39	59
		TRINITY_DN2453_c0_g2_i4	2	p3	(CGG)5	15	316	330
		TRINITY_DN2444_c0_g1_i6	1	c	(T)10aga(T)11	24	379	402
		TRINITY_DN2444_c1_g1_i5	1	p3	(AAG)8	24	1250	1273
		TRINITY_DN2475_c0_g1_i5	1	p2	(CT)6	12	1350	1361
		TRINITY_DN2475_c0_g1_i13	1	p2	(CT)6	12	1242	1253
		TRINITY_DN2475_c0_g1_i1	1	p2	(CT)11	22	1252	1273
		TRINITY_DN2475_c0_g1_i14	1	p2	(CT)11	22	1360	1381
		TRINITY_DN2475_c1_g1_i5	1	p3	(TCC)5	15	83	97
		TRINITY_DN2475_c1_g1_i4	1	p3	(TCC)5	15	83	97
		TRINITY_DN2475_c1_g1_i1	1	p3	(TCC)5	15	83	97
		TRINITY_DN2475_c1_g1_i3	1	p3	(TCC)5	15	83	97
		TRINITY_DN2475_c1_g1_i2	1	p3	(TCC)5	15	83	97
		TRINITY_DN2475_c2_g1_i2	1	p2	(CT)12	24	32	55
		TRINITY_DN2425_c0_g2_i3	1	p3	(GGA)5	15	237	251
		TRINITY_DN2425_c0_g2_i2	1	p3	(GGA)5	15	237	251
		TRINITY_DN2425_c0_g2_i1	1	p3	(GGA)5	15	237	251
		TRINITY_DN2476_c1_g1_i5	1	p1	(A)10	10	223	232
		TRINITY_DN2476_c2_g1_i1	1	p1	(T)11	11	11	21
		TRINITY_DN2483_c0_g1_i10	1	p2	(TC)8	16	1982	1997
		TRINITY_DN2483_c0_g1_i6	1	p2	(TC)8	16	2103	2118
		TRINITY_DN2450_c0_g1_i1	1	p3	(TAC)5	15	1530	1544
		TRINITY_DN2450_c0_g1_i4	1	p4	(AGTC)5	20	1570	1589
		TRINITY_DN2414_c0_g1_i4	1	p3	(CGC)6	18	125	142
		TRINITY_DN2414_c0_g1_i2	1	p3	(CGC)6	18	125	142
		TRINITY_DN2414_c0_g1_i1	1	p3	(CGC)6	18	120	137
		TRINITY_DN2414_c0_g1_i3	1	p3	(CGC)6	18	120	137
		TRINITY_DN2414_c1_g1_i1	1	p1	(T)11	11	310	320
		TRINITY_DN2414_c1_g1_i18	1	p1	(T)11	11	310	320
		TRINITY_DN2414_c1_g1_i2	1	p1	(T)11	11	310	320
		TRINITY_DN2414_c1_g1_i16	1	p3	(GCC)7	21	30	50
		TRINITY_DN2414_c1_g1_i20	1	p3	(GCC)7	21	30	50
		TRINITY_DN2446_c0_g1_i5	1	p4	(GATG)5	20	196	215
		TRINITY_DN2446_c0_g1_i3	1	p4	(GATG)5	20	695	714
		TRINITY_DN2446_c0_g1_i6	1	p4	(GATG)5	20	399	418
		TRINITY_DN2446_c0_g1_i6	2	p2	(AG)7	14	557	570
		TRINITY_DN2446_c0_g1_i4	1	p2	(AG)7	14	355	368
		TRINITY_DN2446_c1_g1_i7	1	p3	(TCT)5	15	197	211
		TRINITY_DN2446_c1_g1_i3	1	p3	(TCT)5	15	197	211
		TRINITY_DN2446_c1_g1_i5	1	p3	(TCT)5	15	197	211
		TRINITY_DN2412_c0_g1_i5	1	p2	(TC)6	12	156	167
		TRINITY_DN2412_c0_g1_i5	2	p2	(GA)6	12	5726	5737
		TRINITY_DN2412_c0_g1_i4	1	p2	(TC)6	12	156	167
		TRINITY_DN2412_c0_g1_i2	1	p2	(TC)6	12	156	167
		TRINITY_DN2412_c0_g1_i3	1	p2	(TC)6	12	156	167
		TRINITY_DN2427_c0_g1_i3	1	p3	(CGT)5	15	834	848
		TRINITY_DN2427_c1_g1_i3	1	p3	(CCT)6	18	151	168
		TRINITY_DN2427_c1_g1_i7	1	p3	(CCT)6	18	151	168
		TRINITY_DN2427_c1_g1_i5	1	p3	(CCT)6	18	151	168
		TRINITY_DN2427_c1_g1_i9	1	p3	(CCT)6	18	151	168
		TRINITY_DN2427_c1_g1_i8	1	p3	(CCT)6	18	151	168
		TRINITY_DN2474_c0_g1_i3	1	p2	(AG)13	26	13	38
		TRINITY_DN2474_c0_g1_i2	1	p2	(AG)13	26	13	38
		TRINITY_DN2474_c0_g1_i7	1	p1	(T)13	13	836	848
		TRINITY_DN2461_c0_g1_i1	1	p3	(GGA)5	15	1730	1744
		TRINITY_DN2461_c0_g1_i7	1	p3	(GGA)5	15	1449	1463
		TRINITY_DN2461_c0_g1_i9	1	p3	(GGA)5	15	1449	1463
		TRINITY_DN2461_c0_g1_i8	1	p3	(GGA)6	18	1449	1466
		TRINITY_DN2461_c0_g1_i3	1	p3	(GGA)6	18	1449	1466
		TRINITY_DN596_c0_g1_i1	1	c	(CAT)6cgttcatagattggcacattcatccttgtattgaagttgatatcacctc(CAT)6	85	5625	5709
		TRINITY_DN596_c0_g1_i2	1	p3	(CAT)6	18	5691	5708
		TRINITY_DN596_c0_g1_i6	1	p3	(CAT)6	18	5691	5708
		TRINITY_DN596_c0_g1_i6	2	p2	(TG)7	14	7289	7302
		TRINITY_DN596_c0_g1_i3	1	p3	(CAT)6	18	5691	5708
		TRINITY_DN596_c0_g1_i3	2	p2	(TG)9	18	7313	7330
		TRINITY_DN549_c0_g1_i6	1	p3	(GTC)5	15	1253	1267
		TRINITY_DN549_c0_g1_i8	1	p3	(GTC)5	15	1253	1267
		TRINITY_DN549_c0_g1_i9	1	p3	(GTC)5	15	1173	1187
		TRINITY_DN549_c0_g1_i5	1	p3	(GTC)5	15	1400	1414
		TRINITY_DN523_c0_g1_i4	1	c	(TCCT)5tccgtccgtcctcactcccctcctcctcctcccggcgatcgcagagaatt(CGC)5	85	132	216
		TRINITY_DN523_c0_g1_i5	1	c	(TCCT)5tccgtccgtcctcactcccctcctcctcctcccggcgatcgcagagaatt(CGC)5	85	132	216
		TRINITY_DN561_c0_g1_i7	1	p3	(AGG)5	15	137	151
		TRINITY_DN561_c0_g1_i7	2	p3	(GCT)6	18	2011	2028
		TRINITY_DN561_c0_g1_i5	1	p3	(AGG)5	15	137	151
		TRINITY_DN561_c0_g1_i6	1	p3	(AGG)5	15	137	151
		TRINITY_DN561_c0_g1_i6	2	p3	(TGC)5	15	1804	1818
		TRINITY_DN561_c0_g1_i6	3	p3	(GCT)6	18	2004	2021
		TRINITY_DN561_c0_g1_i1	1	p3	(AGG)5	15	137	151
		TRINITY_DN561_c0_g1_i1	2	p3	(GCT)6	18	2004	2021
		TRINITY_DN538_c0_g1_i2	1	p4	(AGGA)5	20	2821	2840
		TRINITY_DN538_c0_g1_i1	1	p4	(AGGA)5	20	2845	2864
		TRINITY_DN538_c0_g1_i3	1	p4	(AGGA)5	20	2813	2832
		TRINITY_DN586_c1_g1_i10	1	p3	(GCG)5	15	208	222
		TRINITY_DN586_c1_g1_i12	1	p3	(GCG)5	15	208	222
		TRINITY_DN586_c1_g1_i6	1	p3	(GCG)5	15	208	222
		TRINITY_DN586_c1_g1_i5	1	p3	(GCG)7	21	27	47
		TRINITY_DN530_c0_g1_i7	1	p3	(CGC)5	15	132	146
		TRINITY_DN530_c0_g1_i1	1	p3	(CGC)5	15	132	146
		TRINITY_DN530_c0_g1_i8	1	p3	(CGC)5	15	132	146
		TRINITY_DN530_c0_g1_i2	1	p3	(CGC)5	15	132	146
		TRINITY_DN530_c0_g1_i5	1	p3	(CGC)5	15	132	146
		TRINITY_DN569_c0_g1_i3	1	p4	(AAGC)6	24	360	383
		TRINITY_DN569_c0_g1_i5	1	p4	(AAGC)6	24	360	383
		TRINITY_DN569_c0_g1_i2	1	p4	(AAGC)6	24	360	383
		TRINITY_DN569_c0_g1_i7	1	p4	(AAGC)6	24	360	383
		TRINITY_DN588_c0_g1_i4	1	p1	(A)10	10	3132	3141
		TRINITY_DN507_c0_g1_i5	1	p3	(TGT)7	21	1188	1208
		TRINITY_DN507_c0_g1_i7	1	p3	(GAC)6	18	1955	1972
		TRINITY_DN507_c0_g1_i6	1	p3	(TGT)7	21	1187	1207
		TRINITY_DN507_c0_g1_i2	1	p3	(TGT)7	21	1188	1208
		TRINITY_DN507_c0_g1_i8	1	p3	(TGT)7	21	1187	1207
		TRINITY_DN550_c0_g1_i8	1	p3	(GAG)5	15	163	177
		TRINITY_DN550_c0_g1_i3	1	p3	(GAG)5	15	163	177
		TRINITY_DN540_c0_g1_i11	1	p2	(TG)8	16	1758	1773
		TRINITY_DN573_c0_g2_i1	1	p2	(TG)6	12	193	204
		TRINITY_DN582_c0_g1_i5	1	p3	(AGC)5	15	277	291
		TRINITY_DN582_c0_g1_i6	1	p3	(AGC)5	15	291	305
		TRINITY_DN582_c0_g1_i2	1	p3	(AGC)5	15	291	305
		TRINITY_DN582_c0_g1_i3	1	p3	(AGC)5	15	277	291
		TRINITY_DN582_c1_g1_i5	1	p1	(T)10	10	1037	1046
		TRINITY_DN518_c0_g1_i6	1	p3	(GCG)5	15	224	238
		TRINITY_DN518_c0_g1_i6	2	p3	(CCT)5	15	568	582
		TRINITY_DN518_c0_g1_i8	1	p3	(GCG)6	18	219	236
		TRINITY_DN518_c0_g1_i9	1	p3	(GCG)6	18	217	234
		TRINITY_DN518_c0_g1_i1	1	p3	(GCG)6	18	217	234
		TRINITY_DN518_c0_g1_i3	1	p3	(GCG)6	18	217	234
		TRINITY_DN577_c0_g1_i1	1	p3	(CCG)5	15	257	271
		TRINITY_DN577_c0_g1_i4	1	p3	(CCG)5	15	257	271
		TRINITY_DN577_c0_g1_i5	1	p3	(CCG)5	15	257	271
		TRINITY_DN597_c0_g2_i2	1	p4	(ATGG)5	20	404	423
		TRINITY_DN597_c0_g2_i4	1	p4	(ATGG)5	20	404	423
		TRINITY_DN597_c0_g2_i1	1	p4	(ATGG)5	20	404	423
		TRINITY_DN597_c0_g3_i4	1	p2	(TG)8	16	1517	1532
		TRINITY_DN597_c0_g3_i4	2	p2	(TA)7	14	1921	1934
		TRINITY_DN597_c0_g3_i5	1	p2	(TG)8	16	895	910
		TRINITY_DN597_c0_g3_i2	1	p2	(TG)8	16	517	532
		TRINITY_DN597_c0_g3_i2	2	p2	(TA)7	14	921	934
		TRINITY_DN597_c1_g1_i7	1	p3	(GCG)6	18	160	177
		TRINITY_DN597_c1_g1_i8	1	p3	(GCG)6	18	160	177
		TRINITY_DN516_c0_g1_i2	1	p1	(T)11	11	711	721
		TRINITY_DN516_c2_g1_i1	1	c	(CT)8g(TC)6	29	171	199
		TRINITY_DN570_c0_g1_i2	1	p2	(CT)6	12	1152	1163
		TRINITY_DN570_c0_g1_i1	1	p2	(CT)6	12	695	706
		TRINITY_DN579_c0_g1_i12	1	p3	(AGC)6	18	433	450
		TRINITY_DN579_c0_g1_i4	1	p3	(GAG)6	18	55	72
		TRINITY_DN579_c0_g1_i4	2	p3	(AGC)6	18	651	668
		TRINITY_DN579_c0_g1_i1	1	p3	(GAG)6	18	55	72
		TRINITY_DN579_c0_g1_i1	2	p3	(AGC)6	18	552	569
		TRINITY_DN579_c0_g1_i8	1	p3	(GAG)6	18	55	72
		TRINITY_DN579_c0_g1_i8	2	p3	(AGC)6	18	651	668
		TRINITY_DN579_c0_g1_i11	1	p3	(GAG)6	18	55	72
		TRINITY_DN579_c0_g1_i11	2	p3	(AGC)6	18	651	668
		TRINITY_DN579_c0_g1_i3	1	p3	(AGC)6	18	339	356
		TRINITY_DN579_c0_g1_i5	1	p3	(AGC)6	18	433	450
		TRINITY_DN579_c0_g1_i2	1	p3	(AGC)6	18	339	356
		TRINITY_DN579_c0_g1_i9	1	p3	(AGC)6	18	339	356
		TRINITY_DN579_c1_g1_i1	1	p2	(GA)6	12	98	109
		TRINITY_DN579_c1_g1_i2	1	p2	(GA)6	12	98	109
		TRINITY_DN581_c0_g1_i2	1	p3	(TGT)12	36	3970	4005
		TRINITY_DN581_c0_g1_i7	1	p3	(TGT)12	36	3970	4005
		TRINITY_DN581_c0_g1_i5	1	p3	(TGT)12	36	3966	4001
		TRINITY_DN581_c0_g1_i1	1	p3	(TGT)11	33	3967	3999
		TRINITY_DN521_c0_g2_i1	1	p3	(TTG)5	15	745	759
		TRINITY_DN547_c1_g1_i3	1	p3	(CAC)6	18	81	98
		TRINITY_DN547_c1_g1_i1	1	p3	(CTT)5	15	214	228
		TRINITY_DN535_c0_g1_i4	1	p3	(GGC)5	15	181	195
		TRINITY_DN535_c0_g1_i11	1	p3	(GGC)5	15	181	195
		TRINITY_DN535_c0_g1_i18	1	p3	(GGC)5	15	153	167
		TRINITY_DN535_c0_g1_i16	1	p3	(GGC)5	15	181	195
		TRINITY_DN535_c0_g1_i2	1	p3	(GGC)5	15	153	167
		TRINITY_DN535_c0_g1_i6	1	p3	(GGC)5	15	153	167
		TRINITY_DN535_c0_g1_i13	1	p3	(GGC)6	18	153	170
		TRINITY_DN535_c0_g1_i14	1	p3	(GGC)6	18	153	170
		TRINITY_DN535_c0_g1_i15	1	p3	(GGC)6	18	153	170
		TRINITY_DN522_c0_g1_i8	1	p2	(TG)6	12	411	422
		TRINITY_DN522_c0_g1_i10	1	p2	(TG)6	12	265	276
		TRINITY_DN522_c0_g1_i5	1	p2	(TG)6	12	411	422
		TRINITY_DN522_c0_g1_i7	1	p2	(TG)6	12	411	422
		TRINITY_DN522_c0_g1_i2	1	p2	(TG)6	12	411	422
		TRINITY_DN522_c0_g1_i9	1	p2	(TG)6	12	411	422
		TRINITY_DN522_c0_g1_i6	1	p2	(TG)6	12	411	422
		TRINITY_DN522_c0_g1_i1	1	p2	(TG)6	12	411	422
		TRINITY_DN522_c0_g1_i3	1	p2	(TG)6	12	411	422
		TRINITY_DN522_c0_g1_i4	1	p2	(TG)6	12	265	276
		TRINITY_DN522_c1_g1_i9	1	p2	(AT)6	12	2223	2234
		TRINITY_DN522_c1_g1_i5	1	p2	(AT)6	12	2260	2271
		TRINITY_DN522_c1_g1_i6	1	p2	(AT)6	12	2260	2271
		TRINITY_DN522_c1_g1_i11	1	p2	(AT)6	12	2223	2234
		TRINITY_DN522_c1_g1_i4	1	p2	(AT)6	12	2267	2278
		TRINITY_DN522_c1_g1_i10	1	p2	(AT)6	12	2230	2241
		TRINITY_DN560_c4_g2_i5	1	p3	(CCG)5	15	112	126
		TRINITY_DN531_c0_g1_i11	1	p1	(C)10	10	314	323
		TRINITY_DN599_c0_g1_i3	1	p3	(CCG)7	21	46	66
		TRINITY_DN599_c0_g1_i6	1	p3	(CCG)6	18	46	63
		TRINITY_DN599_c0_g1_i7	1	p3	(CCG)7	21	46	66
		TRINITY_DN599_c0_g1_i1	1	p3	(CCG)6	18	46	63
		TRINITY_DN599_c0_g1_i2	1	p3	(CCG)7	21	46	66
		TRINITY_DN599_c0_g1_i4	1	p3	(CCG)7	21	46	66
		TRINITY_DN599_c0_g1_i8	1	p3	(CCG)7	21	46	66
		TRINITY_DN599_c0_g1_i5	1	p3	(CCG)6	18	46	63
		TRINITY_DN512_c0_g1_i7	1	p3	(CCT)5	15	1530	1544
		TRINITY_DN512_c0_g2_i1	1	p1	(T)10	10	1	10
		TRINITY_DN520_c0_g1_i6	1	p3	(TGA)5	15	1346	1360
		TRINITY_DN520_c0_g1_i4	1	p3	(TGA)5	15	1346	1360
		TRINITY_DN520_c0_g1_i1	1	p3	(TGA)5	15	1346	1360
		TRINITY_DN595_c0_g1_i6	1	p1	(T)12	12	2756	2767
		TRINITY_DN595_c0_g1_i3	1	p4	(CTGT)5	20	176	195
		TRINITY_DN595_c0_g1_i7	1	p1	(T)12	12	2756	2767
		TRINITY_DN595_c0_g1_i4	1	p4	(CTGT)5	20	3741	3760
		TRINITY_DN515_c0_g2_i1	1	p2	(CA)17	34	29	62
		TRINITY_DN515_c1_g1_i1	1	p2	(CA)6	12	391	402
		TRINITY_DN529_c0_g2_i2	1	p3	(GCC)5	15	69	83
		TRINITY_DN529_c0_g2_i3	1	p3	(GCC)5	15	69	83
		TRINITY_DN529_c0_g2_i4	1	p3	(GCC)5	15	69	83
		TRINITY_DN529_c0_g2_i1	1	p3	(GCC)5	15	69	83
		TRINITY_DN529_c4_g1_i1	1	p2	(TG)6	12	176	187
		TRINITY_DN532_c0_g1_i1	1	p2	(GT)18	36	681	716
		TRINITY_DN532_c0_g1_i5	1	p4	(TGAT)5	20	169	188
		TRINITY_DN532_c0_g1_i5	2	p3	(CTG)5	15	1748	1762
		TRINITY_DN532_c0_g1_i5	3	c	(A)10g(A)10	21	2817	2837
		TRINITY_DN532_c0_g1_i2	1	p4	(TGAT)5	20	169	188
		TRINITY_DN532_c0_g1_i2	2	p3	(CTG)5	15	1748	1762
		TRINITY_DN532_c0_g1_i4	1	p2	(GT)18	36	686	721
		TRINITY_DN532_c0_g1_i3	1	p2	(GT)18	36	700	735
		TRINITY_DN532_c0_g3_i1	1	p4	(GCGT)5	20	143	162
		TRINITY_DN557_c0_g1_i2	1	p1	(A)10	10	336	345
		TRINITY_DN557_c0_g1_i3	1	p1	(A)10	10	336	345
		TRINITY_DN557_c1_g1_i4	1	p1	(A)11	11	31	41
		TRINITY_DN557_c1_g1_i8	1	p1	(A)11	11	31	41
		TRINITY_DN557_c1_g1_i2	1	p1	(A)11	11	31	41
		TRINITY_DN541_c0_g1_i15	1	p3	(AGA)5	15	619	633
		TRINITY_DN541_c0_g1_i1	1	p3	(AGA)6	18	632	649
		TRINITY_DN541_c0_g1_i18	1	p3	(AGA)6	18	632	649
		TRINITY_DN541_c0_g1_i11	1	p3	(AGA)6	18	632	649
		TRINITY_DN541_c0_g1_i17	1	p3	(AGA)5	15	619	633
		TRINITY_DN541_c0_g1_i21	1	p3	(AGA)5	15	619	633
		TRINITY_DN541_c0_g1_i14	1	p3	(AGA)6	18	632	649
		TRINITY_DN541_c0_g1_i4	1	p3	(AGA)5	15	619	633
		TRINITY_DN541_c0_g1_i12	1	p3	(AGA)5	15	619	633
		TRINITY_DN541_c0_g1_i8	1	p3	(AGA)5	15	619	633
		TRINITY_DN541_c0_g1_i13	1	p3	(AGA)5	15	619	633
		TRINITY_DN541_c0_g1_i19	1	p3	(AGA)6	18	632	649
		TRINITY_DN541_c0_g1_i16	1	p3	(AGA)5	15	619	633
		TRINITY_DN541_c0_g1_i5	1	p3	(AGA)5	15	619	633
		TRINITY_DN574_c0_g1_i2	1	p4	(ATCC)5	20	105	124
		TRINITY_DN574_c0_g1_i3	1	p4	(ATCC)5	20	105	124
		TRINITY_DN551_c0_g1_i13	1	p3	(GCC)5	15	258	272
		TRINITY_DN551_c0_g1_i4	1	p3	(GCC)5	15	258	272
		TRINITY_DN551_c0_g1_i9	1	p3	(GCC)5	15	258	272
		TRINITY_DN551_c0_g1_i1	1	p3	(GCC)5	15	258	272
		TRINITY_DN551_c0_g1_i10	1	p3	(GCC)5	15	258	272
		TRINITY_DN552_c1_g1_i6	1	p3	(GCG)5	15	672	686
		TRINITY_DN552_c1_g1_i5	1	p3	(GCG)5	15	672	686
		TRINITY_DN564_c0_g1_i1	1	p2	(GA)8	16	3273	3288
		TRINITY_DN501_c0_g1_i2	1	p4	(GGAC)5	20	1291	1310
		TRINITY_DN501_c2_g1_i2	1	c	(GACG)6gaccgacgggaggttcccgaaatggcggtttcggccaaggagcgcaagctgagcaggctcggcagtggtaaggcggcaaac(GGA)5	120	185	304
		TRINITY_DN534_c1_g1_i2	1	p3	(AGA)8	24	1877	1900
		TRINITY_DN534_c1_g1_i1	1	p3	(AGA)8	24	1874	1897
		TRINITY_DN589_c0_g2_i4	1	p2	(TG)7	14	866	879
		TRINITY_DN589_c0_g2_i1	1	p2	(TG)7	14	866	879
		TRINITY_DN589_c1_g1_i10	1	p2	(TG)6	12	1844	1855
		TRINITY_DN527_c0_g2_i8	1	p6	(TTTTTC)5	30	2158	2187
		TRINITY_DN527_c0_g2_i6	1	p3	(CGG)5	15	571	585
		TRINITY_DN527_c0_g2_i7	1	p3	(CGG)5	15	571	585
		TRINITY_DN527_c0_g2_i10	1	p2	(CT)6	12	1361	1372
		TRINITY_DN527_c0_g2_i1	1	p3	(CGG)5	15	571	585
		TRINITY_DN527_c0_g2_i1	2	p6	(TTTTTC)5	30	2021	2050
		TRINITY_DN527_c0_g2_i3	1	p3	(GCA)5	15	376	390
		TRINITY_DN527_c0_g2_i3	2	p3	(CGG)5	15	577	591
		TRINITY_DN527_c0_g2_i3	3	p2	(CT)6	12	1230	1241
		TRINITY_DN568_c0_g1_i2	1	p1	(T)10	10	637	646
		TRINITY_DN568_c0_g3_i2	1	p3	(CGA)5	15	647	661
		TRINITY_DN568_c0_g3_i3	1	p3	(CGA)5	15	653	667
		TRINITY_DN508_c4_g1_i1	1	p2	(TG)6	12	542	553
		TRINITY_DN508_c4_g1_i1	2	p3	(CAT)5	15	670	684
		TRINITY_DN508_c4_g1_i3	1	p2	(TG)6	12	542	553
		TRINITY_DN45123_c0_g1_i3	1	p3	(GCC)5	15	577	591
		TRINITY_DN45123_c0_g1_i1	1	p2	(CT)6	12	143	154
		TRINITY_DN45123_c0_g1_i1	2	p3	(GCC)5	15	475	489
		TRINITY_DN45123_c0_g1_i2	1	p3	(GCC)5	15	452	466
		TRINITY_DN45123_c0_g1_i5	1	p3	(GCC)5	15	495	509
		TRINITY_DN45118_c0_g1_i8	1	p2	(TG)6	12	220	231
		TRINITY_DN45152_c0_g1_i1	1	p2	(AT)8	16	583	598
		TRINITY_DN45131_c0_g1_i1	1	p1	(T)10	10	2114	2123
		TRINITY_DN45187_c0_g2_i1	1	p3	(AAG)5	15	60	74
		TRINITY_DN45161_c2_g1_i1	1	p2	(TG)7	14	98	111
		TRINITY_DN45186_c0_g2_i8	1	p3	(CGG)5	15	332	346
		TRINITY_DN45188_c0_g1_i4	1	p1	(A)10	10	1800	1809
		TRINITY_DN45188_c0_g1_i6	1	p1	(C)11	11	1578	1588
		TRINITY_DN45165_c0_g3_i1	1	p1	(T)13	13	177	189
		TRINITY_DN45104_c0_g2_i1	1	p1	(A)10	10	139	148
		TRINITY_DN45135_c1_g2_i1	1	p1	(A)10	10	127	136
		TRINITY_DN45150_c0_g1_i1	1	p3	(GAG)5	15	441	455
		TRINITY_DN99941_c0_g1_i2	1	p1	(A)10	10	104	113
		TRINITY_DN99942_c0_g1_i1	1	c	(A)12cttac(T)10	27	625	651
		TRINITY_DN5991_c0_g1_i2	1	p3	(CAC)6	18	441	458
		TRINITY_DN5991_c0_g1_i7	1	p2	(CA)6	12	29	40
		TRINITY_DN5907_c0_g2_i5	1	p3	(CGC)5	15	67	81
		TRINITY_DN5907_c0_g2_i4	1	p3	(CGC)5	15	67	81
		TRINITY_DN5907_c0_g2_i1	1	p3	(CGC)7	21	67	87
		TRINITY_DN5907_c0_g2_i3	1	p3	(CGC)5	15	67	81
		TRINITY_DN5950_c0_g1_i5	1	p3	(CAG)7	21	134	154
		TRINITY_DN5950_c0_g1_i6	1	p3	(CAG)7	21	134	154
		TRINITY_DN5950_c1_g1_i1	1	p3	(GCA)6	18	136	153
		TRINITY_DN5928_c1_g1_i4	1	p3	(GTC)5	15	562	576
		TRINITY_DN5928_c1_g1_i6	1	p3	(GTC)5	15	553	567
		TRINITY_DN5928_c1_g1_i1	1	p3	(GTC)5	15	553	567
		TRINITY_DN5928_c1_g1_i2	1	p3	(GTC)5	15	553	567
		TRINITY_DN5928_c1_g1_i3	1	p3	(GTC)5	15	565	579
		TRINITY_DN5916_c0_g1_i17	1	p1	(T)10	10	1268	1277
		TRINITY_DN5916_c0_g1_i18	1	p1	(T)10	10	1256	1265
		TRINITY_DN5916_c0_g1_i15	1	p1	(T)10	10	1292	1301
		TRINITY_DN5916_c0_g1_i3	1	p1	(T)10	10	1249	1258
		TRINITY_DN5916_c0_g1_i5	1	p1	(T)10	10	1261	1270
		TRINITY_DN5916_c0_g1_i4	1	p1	(T)10	10	1285	1294
		TRINITY_DN5974_c0_g1_i3	1	p2	(TG)7	14	659	672
		TRINITY_DN5974_c0_g1_i1	1	p2	(TG)8	16	497	512
		TRINITY_DN5922_c0_g1_i2	1	p3	(GCC)6	18	76	93
		TRINITY_DN5922_c0_g1_i7	1	p3	(GCC)6	18	76	93
		TRINITY_DN5922_c0_g1_i4	1	p3	(GCC)6	18	76	93
		TRINITY_DN5922_c0_g1_i1	1	p3	(GCC)6	18	76	93
		TRINITY_DN5922_c0_g1_i3	1	p3	(GCC)5	15	79	93
		TRINITY_DN5922_c0_g1_i5	1	p3	(GCC)6	18	76	93
		TRINITY_DN5922_c1_g1_i1	1	p3	(GCC)5	15	197	211
		TRINITY_DN5937_c0_g1_i8	1	p3	(GAT)5	15	638	652
		TRINITY_DN5937_c0_g1_i13	1	p3	(GAT)5	15	653	667
		TRINITY_DN5937_c0_g1_i6	1	c	(GAT)5aataagtttccgacgtcgccgaacagccttgcctttgcctttttagccgcttccacagaatccgatacttgagatgatgac(GAT)5	111	653	763
		TRINITY_DN5937_c0_g1_i10	1	c	(GAT)5aataagtttccgatgtcgtcgaacagcctttcctttgccttgttagctgcttccacagaatctaagacttga(GAT)5	102	648	749
		TRINITY_DN5937_c0_g1_i3	1	p3	(GAT)5	15	638	652
		TRINITY_DN5937_c0_g1_i5	1	p3	(GAT)5	15	653	667
		TRINITY_DN5937_c1_g1_i4	1	p3	(ATG)8	24	1290	1313
		TRINITY_DN5977_c0_g2_i1	1	p3	(GAG)6	18	114	131
		TRINITY_DN5929_c0_g1_i1	1	p1	(A)14	14	1176	1189
		TRINITY_DN5993_c0_g1_i14	1	p2	(CT)6	12	63	74
		TRINITY_DN5993_c0_g1_i3	1	p2	(CT)6	12	63	74
		TRINITY_DN5972_c0_g1_i3	1	p4	(TTCC)5	20	40	59
		TRINITY_DN5972_c0_g1_i2	1	p4	(TTCC)5	20	40	59
		TRINITY_DN5972_c0_g2_i1	1	p3	(CCT)5	15	111	125
		TRINITY_DN5972_c2_g1_i2	1	p3	(GCC)5	15	317	331
		TRINITY_DN5968_c0_g1_i1	1	p2	(GC)6	12	376	387
		TRINITY_DN5968_c0_g1_i3	1	p2	(GC)6	12	376	387
		TRINITY_DN5968_c0_g1_i2	1	p2	(GC)6	12	376	387
		TRINITY_DN5998_c0_g2_i5	1	c	(CTC)7acgtccaaactgctggtgctcctctcaacctcctcctg(CT)21	101	911	1011
		TRINITY_DN5998_c1_g1_i4	1	p3	(CTC)7	21	33	53
		TRINITY_DN5998_c1_g1_i1	1	p3	(CTC)7	21	33	53
		TRINITY_DN5998_c1_g1_i5	1	p3	(CTC)7	21	33	53
		TRINITY_DN5998_c1_g1_i6	1	p3	(CTC)7	21	33	53
		TRINITY_DN5999_c0_g1_i3	1	p3	(TCC)6	18	153	170
		TRINITY_DN5999_c0_g1_i2	1	p3	(TCC)6	18	153	170
		TRINITY_DN5900_c0_g1_i3	1	p1	(A)10	10	253	262
		TRINITY_DN5918_c0_g2_i4	1	p3	(GCC)5	15	66	80
		TRINITY_DN5918_c0_g2_i2	1	p3	(GCC)5	15	66	80
		TRINITY_DN5918_c0_g2_i5	1	p3	(GCC)5	15	66	80
		TRINITY_DN5988_c0_g4_i1	1	p3	(CTT)5	15	922	936
		TRINITY_DN5988_c0_g4_i2	1	p3	(CTT)5	15	922	936
		TRINITY_DN5989_c0_g1_i3	1	p3	(GCG)5	15	44	58
		TRINITY_DN5989_c0_g1_i3	2	p3	(GAG)5	15	215	229
		TRINITY_DN5989_c0_g1_i5	1	p3	(GAG)5	15	215	229
		TRINITY_DN5989_c0_g1_i4	1	p3	(GAG)5	15	215	229
		TRINITY_DN5989_c0_g1_i7	1	p3	(GAG)5	15	215	229
		TRINITY_DN5989_c0_g1_i6	1	p3	(GAG)5	15	215	229
		TRINITY_DN5935_c0_g1_i2	1	p2	(TG)12	24	834	857
		TRINITY_DN5932_c0_g1_i1	1	p1	(T)10	10	1317	1326
		TRINITY_DN5994_c1_g1_i1	1	p2	(GA)6	12	288	299
		TRINITY_DN5992_c0_g1_i18	1	p2	(CA)6	12	459	470
		TRINITY_DN5992_c0_g1_i8	1	p2	(CA)6	12	459	470
		TRINITY_DN5992_c0_g1_i17	1	p2	(CA)6	12	459	470
		TRINITY_DN5992_c0_g1_i14	1	p2	(CA)6	12	866	877
		TRINITY_DN5970_c0_g1_i1	1	p3	(CGC)5	15	227	241
		TRINITY_DN5970_c0_g1_i3	1	p3	(CGC)5	15	52	66
		TRINITY_DN5970_c0_g1_i4	1	p3	(CGC)5	15	227	241
		TRINITY_DN5970_c0_g1_i4	2	p1	(T)12	12	849	860
		TRINITY_DN5944_c0_g1_i10	1	p3	(GGA)5	15	638	652
		TRINITY_DN5944_c0_g1_i16	1	p3	(GGA)5	15	635	649
		TRINITY_DN5944_c0_g1_i17	1	p3	(GGA)5	15	609	623
		TRINITY_DN5944_c0_g1_i17	2	p1	(T)10	10	4029	4038
		TRINITY_DN5944_c0_g1_i8	1	p3	(GGA)5	15	609	623
		TRINITY_DN5944_c0_g1_i3	1	p3	(GGA)5	15	609	623
		TRINITY_DN5944_c0_g1_i11	1	p3	(GGA)5	15	635	649
		TRINITY_DN5944_c0_g1_i15	1	p3	(GGA)5	15	638	652
		TRINITY_DN5944_c0_g1_i14	1	p3	(GGA)5	15	609	623
		TRINITY_DN5944_c0_g1_i13	1	p3	(GGA)5	15	609	623
		TRINITY_DN5944_c0_g1_i18	1	p3	(GGA)5	15	609	623
		TRINITY_DN5944_c0_g1_i4	1	p3	(GGA)5	15	638	652
		TRINITY_DN5944_c0_g1_i19	1	p3	(GGA)5	15	609	623
		TRINITY_DN5940_c0_g1_i1	1	p3	(CCT)5	15	48	62
		TRINITY_DN5949_c0_g1_i6	1	p2	(GA)8	16	212	227
		TRINITY_DN5949_c0_g1_i5	1	p2	(GA)8	16	212	227
		TRINITY_DN5949_c3_g1_i3	1	p5	(CCCCT)5	25	32	56
		TRINITY_DN5949_c3_g1_i2	1	p5	(CCCCT)5	25	32	56
		TRINITY_DN5949_c3_g1_i2	2	p5	(GGAAA)10	50	178	227
		TRINITY_DN5969_c0_g1_i2	1	p2	(TC)19	38	77	114
		TRINITY_DN5969_c0_g1_i4	1	p2	(TC)19	38	77	114
		TRINITY_DN5912_c0_g1_i7	1	p3	(CGC)5	15	16	30
		TRINITY_DN5912_c0_g1_i3	1	p3	(CCG)7	21	17	37
		TRINITY_DN5912_c0_g1_i2	1	p3	(CCG)7	21	17	37
		TRINITY_DN5912_c0_g1_i6	1	p3	(CCG)7	21	17	37
		TRINITY_DN5934_c0_g1_i2	1	p1	(A)10	10	1589	1598
		TRINITY_DN5934_c0_g1_i8	1	p1	(A)10	10	1590	1599
		TRINITY_DN5976_c0_g1_i4	1	p3	(GCC)5	15	336	350
		TRINITY_DN5976_c0_g1_i1	1	p3	(GCC)5	15	336	350
		TRINITY_DN5976_c0_g1_i6	1	p3	(GCC)5	15	285	299
		TRINITY_DN5976_c0_g1_i5	1	p3	(GCC)5	15	336	350
		TRINITY_DN5976_c0_g1_i3	1	p3	(GCC)5	15	336	350
		TRINITY_DN5976_c0_g1_i2	1	p3	(GCC)5	15	336	350
		TRINITY_DN84534_c1_g1_i2	1	p2	(GT)7	14	227	240
		TRINITY_DN84561_c0_g1_i1	1	p3	(TGA)5	15	48	62
		TRINITY_DN84540_c0_g1_i3	1	p3	(GAG)5	15	428	442
		TRINITY_DN84540_c0_g1_i1	1	p3	(GAG)5	15	428	442
		TRINITY_DN84576_c0_g1_i2	1	p2	(TC)8	16	75	90
		TRINITY_DN84563_c0_g1_i1	1	p2	(GT)6	12	1400	1411
		TRINITY_DN84591_c0_g1_i1	1	p3	(GCG)5	15	133	147
		TRINITY_DN52125_c1_g1_i2	1	c	(TC)14nctctctcatcgtatcatatgaggaaggattccttccaaacctataatctttacctcatagcttagctcctgga(CT)9	120	322	441
		TRINITY_DN52125_c3_g2_i1	1	p2	(GA)12	24	278	301
		TRINITY_DN52176_c0_g1_i3	1	p1	(G)12	12	57	68
		TRINITY_DN52176_c0_g1_i4	1	p1	(G)13	13	224	236
		TRINITY_DN52131_c0_g1_i4	1	p2	(GT)9	18	271	288
		TRINITY_DN52131_c0_g1_i1	1	p2	(GT)9	18	273	290
		TRINITY_DN52192_c0_g2_i2	1	p1	(A)10	10	1649	1658
		TRINITY_DN52130_c0_g2_i2	1	p1	(T)12	12	527	538
		TRINITY_DN52190_c1_g1_i2	1	p3	(GAC)5	15	202	216
		TRINITY_DN52116_c3_g1_i1	1	p1	(A)10	10	154	163
		TRINITY_DN70779_c0_g1_i1	1	p1	(T)10	10	1092	1101
		TRINITY_DN70715_c0_g1_i1	1	p2	(AG)9	18	48	65
		TRINITY_DN70725_c0_g1_i1	1	p1	(A)11	11	233	243
		TRINITY_DN70780_c0_g1_i4	1	p1	(T)10	10	30	39
		TRINITY_DN70718_c0_g1_i1	1	p1	(T)10	10	274	283
		TRINITY_DN70718_c0_g1_i2	1	p1	(T)10	10	274	283
		TRINITY_DN70711_c0_g1_i1	1	p3	(CCA)5	15	203	217
		TRINITY_DN979_c0_g1_i8	1	p2	(CA)8	16	205	220
		TRINITY_DN979_c0_g1_i6	1	p2	(CA)12	24	126	149
		TRINITY_DN979_c0_g1_i7	1	p2	(CA)11	22	126	147
		TRINITY_DN979_c0_g1_i5	1	p2	(CA)11	22	126	147
		TRINITY_DN979_c0_g1_i4	1	p2	(CA)11	22	126	147
		TRINITY_DN979_c0_g1_i9	1	p2	(CA)11	22	126	147
		TRINITY_DN979_c0_g1_i2	1	p2	(CA)8	16	205	220
		TRINITY_DN979_c0_g1_i1	1	p2	(CA)8	16	205	220
		TRINITY_DN909_c0_g2_i1	1	p3	(AAG)5	15	487	501
		TRINITY_DN994_c2_g1_i1	1	p2	(TC)6	12	95	106
		TRINITY_DN953_c0_g1_i4	1	p2	(GA)16	32	502	533
		TRINITY_DN953_c0_g1_i1	1	p2	(GA)16	32	502	533
		TRINITY_DN953_c0_g1_i6	1	p2	(GA)16	32	502	533
		TRINITY_DN953_c1_g1_i3	1	p2	(TC)6	12	78	89
		TRINITY_DN954_c0_g2_i1	1	p3	(ATG)6	18	1203	1220
		TRINITY_DN954_c0_g2_i3	1	p3	(ATG)6	18	1203	1220
		TRINITY_DN954_c1_g1_i3	1	p3	(GGA)5	15	2	16
		TRINITY_DN921_c0_g1_i11	1	p3	(AAG)5	15	799	813
		TRINITY_DN921_c0_g1_i2	1	p3	(AAG)5	15	778	792
		TRINITY_DN921_c0_g1_i8	1	p3	(AAG)5	15	799	813
		TRINITY_DN921_c0_g1_i4	1	p3	(AAG)5	15	778	792
		TRINITY_DN921_c0_g1_i3	1	p3	(AAG)5	15	799	813
		TRINITY_DN921_c0_g1_i9	1	p3	(AAG)5	15	799	813
		TRINITY_DN921_c0_g1_i7	1	p3	(AAG)5	15	778	792
		TRINITY_DN921_c0_g1_i6	1	p3	(AAG)5	15	778	792
		TRINITY_DN921_c0_g1_i10	1	p3	(AAG)5	15	778	792
		TRINITY_DN921_c0_g1_i5	1	p3	(AAG)5	15	778	792
		TRINITY_DN921_c0_g1_i1	1	p3	(AAG)5	15	799	813
		TRINITY_DN937_c4_g1_i1	1	p3	(TCG)5	15	94	108
		TRINITY_DN918_c0_g1_i5	1	p3	(AGG)5	15	1202	1216
		TRINITY_DN918_c0_g1_i2	1	p3	(GAG)5	15	1198	1212
		TRINITY_DN918_c1_g2_i2	1	p2	(GT)6	12	389	400
		TRINITY_DN918_c3_g1_i1	1	p1	(A)10	10	197	206
		TRINITY_DN995_c0_g1_i4	1	p2	(TC)8	16	516	531
		TRINITY_DN995_c0_g1_i10	1	c*	(GTG)6gaccggtggcgctgcgaatccgagggagtagaaaggcgctcctctcctctcctccgtttcgcgagtc(AG)6(GAGAGG)5*	122	691	812
		TRINITY_DN995_c0_g1_i1	1	c	(GA)12ggggtgcactagggcagcactagacgttggttgctttggagtcgtgtgcatcaccctcctttctctctctcca(TC)8tgccccgggccgcggactt(TC)8	148	384	531
		TRINITY_DN916_c0_g1_i3	1	p3	(CGC)5	15	3	17
		TRINITY_DN916_c0_g2_i1	1	p3	(GCC)6	18	176	193
		TRINITY_DN911_c0_g1_i1	1	c	(CACG)6ca(GCAC)6	50	90	139
		TRINITY_DN911_c0_g2_i5	1	p4	(GCAC)5	20	42	61
		TRINITY_DN911_c0_g2_i4	1	p4	(GCAC)5	20	42	61
		TRINITY_DN911_c0_g2_i3	1	p4	(GCAC)5	20	42	61
		TRINITY_DN911_c0_g2_i1	1	p4	(GCAC)5	20	42	61
		TRINITY_DN907_c0_g1_i7	1	p1	(A)10	10	1873	1882
		TRINITY_DN907_c0_g1_i8	1	p1	(A)10	10	1875	1884
		TRINITY_DN907_c0_g1_i2	1	p1	(A)10	10	2044	2053
		TRINITY_DN946_c0_g1_i14	1	p3	(TAG)5	15	2470	2484
		TRINITY_DN965_c0_g1_i4	1	p3	(CGC)7	21	141	161
		TRINITY_DN965_c0_g1_i5	1	p3	(CGC)7	21	141	161
		TRINITY_DN965_c0_g1_i1	1	p3	(CGC)7	21	141	161
		TRINITY_DN965_c0_g1_i3	1	p3	(CGC)5	15	141	155
		TRINITY_DN965_c0_g1_i6	1	p3	(CGC)7	21	141	161
		TRINITY_DN965_c0_g1_i2	1	p3	(CGC)7	21	141	161
		TRINITY_DN965_c2_g1_i2	1	p3	(CCG)6	18	226	243
		TRINITY_DN923_c0_g1_i1	1	p2	(AG)8	16	150	165
		TRINITY_DN923_c0_g2_i4	1	p3	(TGC)6	18	513	530
		TRINITY_DN923_c0_g2_i5	1	p3	(TCT)5	15	635	649
		TRINITY_DN923_c0_g2_i3	1	p3	(TCT)5	15	635	649
		TRINITY_DN923_c0_g2_i2	1	p3	(TGC)6	18	513	530
		TRINITY_DN923_c0_g2_i1	1	p3	(TCT)5	15	635	649
		TRINITY_DN904_c1_g1_i8	1	p2	(GT)9	18	840	857
		TRINITY_DN904_c1_g1_i3	1	p3	(GCC)5	15	497	511
		TRINITY_DN904_c1_g1_i3	2	p2	(GT)9	18	852	869
		TRINITY_DN904_c1_g1_i1	1	p3	(CCG)7	21	446	466
		TRINITY_DN904_c1_g1_i9	1	p2	(GT)9	18	840	857
		TRINITY_DN904_c1_g1_i2	1	p3	(GCC)5	15	497	511
		TRINITY_DN904_c1_g1_i2	2	p2	(GT)9	18	852	869
		TRINITY_DN904_c1_g1_i7	1	p2	(GT)9	18	840	857
		TRINITY_DN904_c1_g1_i4	1	p3	(GCC)5	15	497	511
		TRINITY_DN904_c1_g1_i4	2	p2	(GT)9	18	852	869
		TRINITY_DN975_c0_g1_i6	1	p3	(GCT)6	18	869	886
		TRINITY_DN975_c0_g1_i2	1	p3	(TAC)5	15	423	437
		TRINITY_DN975_c0_g1_i4	1	p3	(GGC)5	15	181	195
		TRINITY_DN975_c0_g1_i3	1	p3	(TCT)5	15	448	462
		TRINITY_DN975_c0_g1_i5	1	p3	(GGC)5	15	181	195
		TRINITY_DN975_c0_g1_i7	1	p3	(TCT)5	15	467	481
		TRINITY_DN984_c0_g1_i5	1	p3	(AGA)5	15	781	795
		TRINITY_DN984_c0_g1_i3	1	p3	(AGA)5	15	781	795
		TRINITY_DN984_c0_g1_i7	1	p3	(AGA)5	15	781	795
		TRINITY_DN984_c0_g1_i4	1	p3	(AGA)5	15	781	795
		TRINITY_DN951_c0_g1_i2	1	p3	(TGG)6	18	228	245
		TRINITY_DN963_c0_g1_i3	1	p3	(CGA)8	24	41	64
		TRINITY_DN963_c0_g1_i1	1	p3	(CGA)8	24	41	64
		TRINITY_DN963_c0_g1_i4	1	p3	(CGA)8	24	41	64
		TRINITY_DN987_c0_g2_i8	1	p3	(CAG)5	15	847	861
		TRINITY_DN987_c0_g2_i7	1	p3	(CAG)5	15	799	813
		TRINITY_DN987_c0_g2_i6	1	p3	(CAG)5	15	839	853
		TRINITY_DN987_c0_g2_i4	1	p3	(CAG)5	15	854	868
		TRINITY_DN987_c0_g2_i5	1	p3	(CAG)5	15	839	853
		TRINITY_DN987_c0_g2_i2	1	p3	(CAG)5	15	854	868
		TRINITY_DN987_c0_g2_i3	1	p3	(CAG)5	15	847	861
		TRINITY_DN910_c1_g1_i2	1	p3	(GGA)5	15	252	266
		TRINITY_DN980_c0_g1_i8	1	p1	(T)10	10	1720	1729
		TRINITY_DN980_c0_g1_i4	1	p1	(T)10	10	1717	1726
		TRINITY_DN980_c0_g1_i6	1	p1	(T)10	10	1723	1732
		TRINITY_DN980_c0_g1_i9	1	p1	(T)10	10	1726	1735
		TRINITY_DN932_c1_g1_i3	1	p3	(GCG)5	15	72	86
		TRINITY_DN932_c1_g1_i2	1	p3	(GCG)5	15	521	535
		TRINITY_DN967_c0_g1_i2	1	p3	(CTC)6	18	588	605
		TRINITY_DN967_c0_g1_i1	1	p3	(CTC)6	18	588	605
		TRINITY_DN967_c0_g2_i9	1	p1	(A)10	10	1412	1421
		TRINITY_DN926_c0_g1_i9	1	p2	(TA)7	14	1165	1178
		TRINITY_DN926_c0_g1_i1	1	p2	(TA)7	14	1170	1183
		TRINITY_DN926_c0_g1_i5	1	p2	(TA)7	14	1170	1183
		TRINITY_DN926_c0_g1_i3	1	p2	(TA)7	14	941	954
		TRINITY_DN926_c0_g1_i8	1	p2	(TA)7	14	941	954
		TRINITY_DN900_c0_g1_i4	1	p3	(GCA)6	18	1317	1334
		TRINITY_DN900_c0_g1_i3	1	p3	(CCG)5	15	1052	1066
		TRINITY_DN900_c0_g1_i3	2	p3	(GCA)6	18	1320	1337
		TRINITY_DN999_c0_g1_i6	1	p2	(TG)6	12	436	447
		TRINITY_DN999_c0_g2_i1	1	p2	(GA)9	18	245	262
		TRINITY_DN999_c0_g2_i2	1	p2	(GA)10	20	245	264
		TRINITY_DN988_c0_g1_i5	1	p1	(T)10	10	1575	1584
		TRINITY_DN988_c0_g1_i2	1	p1	(T)10	10	1575	1584
		TRINITY_DN988_c0_g1_i1	1	p1	(T)10	10	1575	1584
		TRINITY_DN988_c0_g1_i4	1	p1	(T)10	10	1575	1584
		TRINITY_DN924_c0_g1_i8	1	p3	(CGG)5	15	228	242
		TRINITY_DN949_c0_g1_i6	1	p3	(GCC)5	15	189	203
		TRINITY_DN949_c0_g1_i12	1	p3	(CCG)5	15	106	120
		TRINITY_DN939_c0_g1_i2	1	p3	(GGC)5	15	557	571
		TRINITY_DN939_c0_g1_i5	1	p3	(GGC)5	15	527	541
		TRINITY_DN939_c0_g1_i9	1	p3	(GGC)5	15	527	541
		TRINITY_DN939_c0_g1_i4	1	p3	(GGC)5	15	784	798
		TRINITY_DN944_c0_g1_i2	1	p1	(T)10	10	3216	3225
		TRINITY_DN917_c0_g2_i7	1	p4	(AATC)6	24	2130	2153
		TRINITY_DN917_c0_g2_i1	1	p4	(AATC)6	24	2130	2153
		TRINITY_DN917_c2_g1_i1	1	p4	(ATCA)6	24	235	258
		TRINITY_DN986_c0_g1_i4	1	p2	(TG)9	18	226	243
		TRINITY_DN986_c0_g1_i2	1	p2	(TG)9	18	193	210
		TRINITY_DN943_c0_g1_i2	1	p2	(GA)6	12	64	75
		TRINITY_DN933_c2_g1_i3	1	p3	(CCA)5	15	117	131
		TRINITY_DN998_c0_g1_i11	1	p2	(AG)6	12	220	231
		TRINITY_DN998_c0_g1_i11	2	p3	(GAT)5	15	1309	1323
		TRINITY_DN998_c0_g1_i3	1	p3	(GAT)5	15	1144	1158
		TRINITY_DN998_c0_g1_i1	1	p3	(GGA)5	15	289	303
		TRINITY_DN998_c0_g1_i12	1	p3	(GGA)5	15	289	303
		TRINITY_DN998_c0_g1_i12	2	p3	(GAT)5	15	1310	1324
		TRINITY_DN998_c0_g1_i12	3	p3	(TAT)5	15	1535	1549
		TRINITY_DN998_c0_g1_i8	1	p2	(AG)6	12	220	231
		TRINITY_DN998_c0_g1_i8	2	p3	(GAT)5	15	1309	1323
		TRINITY_DN998_c0_g1_i8	3	p3	(TAT)5	15	1534	1548
		TRINITY_DN998_c0_g1_i9	1	p3	(GGA)5	15	289	303
		TRINITY_DN998_c0_g1_i6	1	p2	(AG)6	12	220	231
		TRINITY_DN998_c0_g1_i4	1	p2	(AG)6	12	220	231
		TRINITY_DN998_c0_g1_i2	1	p3	(GGA)5	15	289	303
		TRINITY_DN998_c0_g1_i2	2	p3	(GAT)5	15	1310	1324
		TRINITY_DN903_c0_g1_i1	1	p3	(GAA)7	21	28	48
		TRINITY_DN903_c0_g1_i2	1	p3	(GAA)7	21	28	48
		TRINITY_DN977_c0_g1_i2	1	p3	(CGC)6	18	229	246
		TRINITY_DN977_c0_g1_i11	1	p3	(CGC)5	15	238	252
		TRINITY_DN977_c0_g1_i4	1	p3	(CGC)5	15	238	252
		TRINITY_DN977_c0_g1_i9	1	p3	(CGC)6	18	235	252
		TRINITY_DN977_c0_g1_i1	1	p3	(CGC)6	18	238	255
		TRINITY_DN968_c1_g1_i1	1	p2	(AT)6	12	1887	1898
		TRINITY_DN968_c1_g1_i4	1	p2	(AT)6	12	594	605
		TRINITY_DN968_c1_g1_i7	1	p2	(AT)6	12	1382	1393
		TRINITY_DN968_c1_g1_i6	1	p2	(AT)6	12	1887	1898
		TRINITY_DN990_c0_g1_i1	1	p3	(GAT)5	15	2	16
		TRINITY_DN990_c0_g1_i2	1	p3	(GAT)5	15	2	16
		TRINITY_DN942_c0_g2_i1	1	p3	(AAG)5	15	1241	1255
		TRINITY_DN913_c0_g1_i6	1	p3	(CGA)5	15	960	974
		TRINITY_DN913_c0_g1_i2	1	p3	(CGA)5	15	960	974
		TRINITY_DN901_c0_g1_i9	1	p1	(A)11	11	58	68
		TRINITY_DN901_c0_g1_i9	2	p3	(GCA)5	15	305	319
		TRINITY_DN901_c0_g1_i9	3	p3	(TGA)5	15	851	865
		TRINITY_DN901_c0_g1_i10	1	p1	(A)11	11	58	68
		TRINITY_DN901_c0_g1_i10	2	p3	(GCA)5	15	305	319
		TRINITY_DN901_c0_g1_i10	3	p3	(TGA)5	15	851	865
		TRINITY_DN901_c0_g1_i3	1	p3	(GCA)6	18	314	331
		TRINITY_DN901_c0_g1_i3	2	p3	(TGA)5	15	873	887
		TRINITY_DN901_c0_g1_i2	1	p1	(A)11	11	58	68
		TRINITY_DN901_c0_g1_i2	2	p3	(GCA)5	15	305	319
		TRINITY_DN901_c0_g1_i4	1	p3	(GCA)7	21	286	306
		TRINITY_DN901_c0_g1_i4	2	p3	(TGA)5	15	860	874
		TRINITY_DN901_c0_g1_i8	1	p3	(GCA)7	21	286	306
		TRINITY_DN901_c0_g1_i8	2	p3	(TGA)5	15	832	846
		TRINITY_DN901_c0_g1_i11	1	p1	(A)11	11	58	68
		TRINITY_DN901_c0_g1_i11	2	p3	(GCA)5	15	305	319
		TRINITY_DN901_c0_g1_i11	3	p3	(TGA)5	15	879	893
		TRINITY_DN901_c0_g1_i7	1	p3	(GCA)7	21	286	306
		TRINITY_DN901_c0_g1_i7	2	p3	(TGA)5	15	832	846
		TRINITY_DN970_c0_g1_i3	1	p3	(CGC)6	18	157	174
		TRINITY_DN970_c0_g1_i1	1	p3	(CGC)6	18	157	174
		TRINITY_DN970_c0_g1_i1	2	p4	(TGTC)5	20	4147	4166
		TRINITY_DN970_c0_g1_i2	1	p3	(CGC)6	18	157	174
		TRINITY_DN970_c0_g1_i2	2	p4	(TGTC)5	20	4147	4166
		TRINITY_DN936_c0_g1_i10	1	c	(TC)8taaaagaaaat(A)10	37	94	130
		TRINITY_DN936_c0_g1_i10	2	c	(GAC)5(GCT)5	30	613	642
		TRINITY_DN936_c0_g1_i13	1	c	(GAC)5(GCT)5	30	613	642
		TRINITY_DN936_c0_g1_i13	2	p2	(AG)10	20	2967	2986
		TRINITY_DN936_c0_g1_i11	1	c	(GAC)5(GCT)5	30	613	642
		TRINITY_DN936_c0_g1_i11	2	p4	(AGGA)5	20	2980	2999
		TRINITY_DN936_c0_g1_i8	1	p4	(AGGA)5	20	2965	2984
		TRINITY_DN936_c0_g1_i12	1	c	(GAC)5(GCT)5	30	613	642
		TRINITY_DN936_c0_g1_i12	2	p2	(AG)10	20	3003	3022
		TRINITY_DN936_c0_g1_i6	1	p2	(AG)10	20	2952	2971
		TRINITY_DN936_c0_g1_i3	1	c	(GAC)5(GCT)5	30	613	642
		TRINITY_DN936_c0_g1_i3	2	p4	(AGGA)5	20	3016	3035
		TRINITY_DN936_c0_g1_i14	1	p4	(AGGA)5	20	3025	3044
		TRINITY_DN936_c0_g1_i4	1	c	(GAC)5(GCT)5	30	613	642
		TRINITY_DN74163_c0_g1_i1	1	p2	(CA)19	38	1270	1307
		TRINITY_DN74189_c0_g1_i5	1	p3	(CCA)5	15	935	949
		TRINITY_DN74189_c0_g1_i5	2	p3	(CCA)6	18	1241	1258
		TRINITY_DN74189_c0_g1_i3	1	p3	(ACC)7	21	964	984
		TRINITY_DN74189_c0_g1_i1	1	p3	(CCA)5	15	935	949
		TRINITY_DN74189_c0_g1_i1	2	p3	(CCA)6	18	1238	1255
		TRINITY_DN74189_c0_g1_i4	1	p3	(CCA)5	15	935	949
		TRINITY_DN74189_c0_g1_i2	1	p3	(CCA)6	18	1162	1179
		TRINITY_DN74108_c0_g1_i1	1	p3	(AAT)5	15	258	272
		TRINITY_DN74109_c0_g1_i1	1	p4	(TTTC)8	32	1015	1046
		TRINITY_DN74119_c2_g1_i1	1	p3	(GAG)5	15	307	321
		TRINITY_DN34753_c0_g1_i4	1	p3	(ACG)6	18	144	161
		TRINITY_DN34753_c0_g1_i3	1	p3	(ACG)6	18	144	161
		TRINITY_DN34753_c0_g1_i2	1	c	(AG)8aagagagggaaaga(AG)6	42	43	84
		TRINITY_DN34753_c0_g1_i2	2	p3	(ACG)5	15	261	275
		TRINITY_DN34753_c0_g1_i1	1	p3	(ACG)6	18	144	161
		TRINITY_DN34724_c0_g1_i1	1	p3	(CCA)5	15	159	173
		TRINITY_DN34724_c0_g1_i3	1	p3	(CAT)5	15	179	193
		TRINITY_DN34724_c0_g1_i2	1	p3	(CAT)5	15	179	193
		TRINITY_DN34724_c0_g1_i2	2	p2	(GA)11	22	461	482
		TRINITY_DN34784_c0_g1_i2	1	p1	(C)11	11	176	186
		TRINITY_DN34757_c0_g1_i2	1	c	(GC)6catgggataggtaggggctctcggcgggccatggagtgggacagcgactcggacggcagcggggaggaggac(GAG)5	99	175	273
		TRINITY_DN34727_c0_g1_i4	1	p3	(GAC)5	15	158	172
		TRINITY_DN34727_c0_g1_i3	1	p3	(GAC)5	15	158	172
		TRINITY_DN34727_c0_g1_i2	1	p3	(GAC)5	15	158	172
		TRINITY_DN34743_c0_g1_i5	1	p3	(GAC)5	15	1797	1811
		TRINITY_DN34743_c0_g1_i7	1	p3	(GAC)5	15	1797	1811
		TRINITY_DN34743_c0_g1_i1	1	p3	(GAC)5	15	210	224
		TRINITY_DN34743_c0_g1_i2	1	p3	(GAC)5	15	1797	1811
		TRINITY_DN34743_c0_g1_i4	1	p3	(GAC)5	15	1797	1811
		TRINITY_DN34719_c0_g1_i1	1	p3	(CCT)5	15	450	464
		TRINITY_DN34799_c0_g1_i3	1	p2	(GT)23	46	765	810
		TRINITY_DN34799_c0_g1_i4	1	p2	(GT)23	46	7	52
		TRINITY_DN34789_c0_g1_i1	1	p2	(GA)7	14	96	109
		TRINITY_DN12301_c0_g1_i2	1	p3	(GAT)5	15	2639	2653
		TRINITY_DN12301_c0_g1_i1	1	p3	(GAT)5	15	182	196
		TRINITY_DN12301_c0_g1_i7	1	p3	(GAT)5	15	2657	2671
		TRINITY_DN12301_c0_g1_i3	1	p3	(GAT)5	15	2639	2653
		TRINITY_DN12301_c0_g1_i11	1	p3	(GAT)5	15	464	478
		TRINITY_DN12301_c0_g1_i12	1	p3	(GAT)5	15	2657	2671
		TRINITY_DN12301_c0_g1_i14	1	p3	(GAT)5	15	2639	2653
		TRINITY_DN12320_c0_g1_i7	1	p1	(A)10	10	1108	1117
		TRINITY_DN12330_c0_g2_i1	1	p3	(AAG)5	15	374	388
		TRINITY_DN12390_c0_g1_i1	1	p3	(CTC)5	15	208	222
		TRINITY_DN12390_c0_g1_i2	1	p3	(CTC)5	15	208	222
		TRINITY_DN12390_c0_g1_i4	1	p3	(CTC)5	15	208	222
		TRINITY_DN12390_c0_g1_i3	1	p3	(CTC)5	15	208	222
		TRINITY_DN12327_c1_g1_i5	1	p2	(GA)6	12	163	174
		TRINITY_DN12327_c1_g1_i1	1	p2	(GA)6	12	163	174
		TRINITY_DN12361_c0_g1_i5	1	p1	(T)10	10	2352	2361
		TRINITY_DN12361_c0_g1_i6	1	p1	(T)10	10	2371	2380
		TRINITY_DN12371_c0_g1_i3	1	p3	(CTT)5	15	1222	1236
		TRINITY_DN12371_c0_g1_i2	1	p3	(CTT)6	18	1099	1116
		TRINITY_DN12371_c0_g1_i4	1	p3	(CTT)5	15	1096	1110
		TRINITY_DN12300_c0_g1_i3	1	c	(CT)8catcctg(CT)17	57	538	594
		TRINITY_DN12300_c0_g1_i6	1	c	(CT)8catcctg(CT)17	57	538	594
		TRINITY_DN12342_c0_g1_i1	1	p3	(GCC)5	15	222	236
		TRINITY_DN12342_c0_g1_i5	1	p3	(GCC)5	15	222	236
		TRINITY_DN12340_c0_g1_i13	1	p3	(GCT)5	15	1617	1631
		TRINITY_DN12340_c3_g1_i4	1	p3	(AGC)5	15	350	364
		TRINITY_DN12340_c3_g1_i2	1	p3	(AGC)5	15	335	349
		TRINITY_DN12306_c0_g1_i6	1	p3	(CTC)7	21	193	213
		TRINITY_DN12306_c0_g1_i4	1	p3	(CTC)7	21	193	213
		TRINITY_DN12306_c0_g1_i2	1	p3	(CCT)5	15	201	215
		TRINITY_DN12306_c0_g1_i1	1	p3	(CTC)7	21	193	213
		TRINITY_DN12355_c0_g1_i2	1	c	(CGC)5c(GGA)6	34	30	63
		TRINITY_DN12344_c0_g1_i1	1	p3	(CCG)7	21	188	208
		TRINITY_DN12369_c1_g1_i1	1	p3	(CTG)9	27	30	56
		TRINITY_DN12348_c0_g2_i9	1	p2	(CT)7	14	56	69
		TRINITY_DN12329_c0_g2_i4	1	p4	(CTTT)11	44	1498	1541
		TRINITY_DN12357_c0_g1_i3	1	p3	(CAC)7	21	366	386
		TRINITY_DN12357_c0_g1_i4	1	p3	(CAC)5	15	366	380
		TRINITY_DN12349_c0_g1_i2	1	p3	(GAG)5	15	243	257
		TRINITY_DN12349_c0_g1_i2	2	p3	(CAG)5	15	444	458
		TRINITY_DN12349_c0_g1_i8	1	p3	(GAG)5	15	243	257
		TRINITY_DN12349_c0_g1_i8	2	p3	(CAG)5	15	444	458
		TRINITY_DN12349_c0_g1_i10	1	p3	(GAG)6	18	243	260
		TRINITY_DN12349_c0_g1_i10	2	p3	(CAG)5	15	447	461
		TRINITY_DN12349_c0_g1_i5	1	p3	(GAG)5	15	243	257
		TRINITY_DN12349_c0_g1_i5	2	p3	(CAG)5	15	444	458
		TRINITY_DN12325_c0_g1_i4	1	p3	(CTG)8	24	7342	7365
		TRINITY_DN12325_c0_g1_i6	1	p3	(CTG)8	24	7321	7344
		TRINITY_DN12324_c0_g1_i5	1	p2	(GC)6	12	181	192
		TRINITY_DN12341_c0_g3_i4	1	p3	(TGC)5	15	317	331
		TRINITY_DN12358_c0_g1_i6	1	p2	(AC)7	14	16	29
		TRINITY_DN12358_c0_g1_i9	1	p1	(A)10	10	609	618
		TRINITY_DN12318_c0_g1_i4	1	p2	(CG)6	12	264	275
		TRINITY_DN12319_c0_g1_i4	1	p2	(TG)6	12	285	296
		TRINITY_DN12319_c0_g1_i5	1	p2	(GT)6	12	283	294
		TRINITY_DN12319_c0_g1_i2	1	p2	(GT)6	12	283	294
		TRINITY_DN12393_c0_g1_i2	1	p3	(CTT)5	15	680	694
		TRINITY_DN12397_c0_g1_i7	1	p1	(T)10	10	290	299
		TRINITY_DN12397_c0_g1_i19	1	p2	(CA)8	16	49	64
		TRINITY_DN12397_c0_g1_i19	2	p1	(T)10	10	290	299
		TRINITY_DN12397_c0_g1_i8	1	c	(TG)9tatat(AC)12	47	17	63
		TRINITY_DN12397_c0_g1_i8	2	p1	(T)10	10	290	299
		TRINITY_DN12397_c0_g1_i14	1	p1	(T)10	10	290	299
		TRINITY_DN12397_c0_g1_i3	1	p1	(T)10	10	290	299
		TRINITY_DN12379_c1_g2_i2	1	p1	(A)10	10	826	835
		TRINITY_DN12375_c0_g1_i2	1	p3	(CGC)5	15	2192	2206
		TRINITY_DN12328_c0_g2_i1	1	p3	(GAC)5	15	455	469
		TRINITY_DN12396_c0_g1_i5	1	p3	(CCT)6	18	217	234
		TRINITY_DN12396_c0_g1_i4	1	p3	(CCT)6	18	217	234
		TRINITY_DN12347_c0_g2_i2	1	p3	(GCC)6	18	789	806
		TRINITY_DN12347_c0_g2_i4	1	p3	(GCC)6	18	784	801
		TRINITY_DN12347_c0_g2_i1	1	p2	(TC)6	12	212	223
		TRINITY_DN12347_c0_g2_i1	2	p3	(GCC)6	18	764	781
		TRINITY_DN12347_c0_g2_i5	1	p3	(GCC)6	18	782	799
		TRINITY_DN12347_c0_g2_i3	1	c	(GCC)6cgtcgcccccggggcccacttccctgatgactccgccatggcatc(GCA)6	81	783	863
		TRINITY_DN12370_c0_g1_i2	1	p3	(GTC)6	18	163	180
		TRINITY_DN33406_c0_g1_i2	1	p1	(T)11	11	377	387
		TRINITY_DN33406_c0_g1_i1	1	p1	(T)11	11	377	387
		TRINITY_DN33478_c0_g1_i1	1	p3	(CCT)6	18	545	562
		TRINITY_DN33478_c0_g1_i2	1	p2	(TC)7	14	378	391
		TRINITY_DN33478_c0_g1_i2	2	p3	(CCT)6	18	545	562
		TRINITY_DN33490_c0_g3_i1	1	p2	(GA)9	18	258	275
		TRINITY_DN33490_c0_g3_i3	1	p2	(GA)9	18	258	275
		TRINITY_DN33486_c0_g1_i3	1	p3	(CTC)7	21	392	412
		TRINITY_DN33486_c1_g1_i5	1	p3	(CCT)6	18	336	353
		TRINITY_DN33429_c0_g1_i1	1	p3	(GCG)5	15	473	487
		TRINITY_DN33462_c0_g2_i1	1	p3	(AGC)5	15	229	243
		TRINITY_DN33419_c0_g1_i1	1	p1	(T)10	10	733	742
		TRINITY_DN33401_c0_g1_i2	1	p3	(GCG)5	15	137	151
		TRINITY_DN33483_c1_g1_i3	1	p2	(TC)7	14	682	695
		TRINITY_DN33483_c1_g1_i1	1	p2	(TC)7	14	682	695
		TRINITY_DN33447_c0_g1_i1	1	p1	(A)12	12	494	505
		TRINITY_DN33447_c0_g1_i3	1	p1	(A)12	12	545	556
		TRINITY_DN33400_c0_g1_i1	1	p4	(GCTT)5	20	811	830
		TRINITY_DN33400_c0_g3_i1	1	p4	(TGCT)5	20	146	165
		TRINITY_DN33400_c0_g3_i1	2	p4	(GCTT)5	20	435	454
		TRINITY_DN33487_c1_g1_i4	1	p1	(T)10	10	812	821
		TRINITY_DN33487_c1_g1_i2	1	p1	(T)10	10	816	825
		TRINITY_DN33454_c0_g2_i1	1	p3	(CGC)5	15	334	348
		TRINITY_DN41388_c2_g3_i1	1	p1	(T)10	10	136	145
		TRINITY_DN41379_c0_g1_i2	1	p3	(GCT)5	15	1599	1613
		TRINITY_DN41379_c0_g1_i1	1	p3	(GCT)5	15	1572	1586
		TRINITY_DN41329_c1_g1_i2	1	p3	(CGA)5	15	580	594
		TRINITY_DN41329_c1_g1_i3	1	p3	(CGA)5	15	1521	1535
		TRINITY_DN41321_c0_g1_i3	1	p3	(CAC)5	15	972	986
		TRINITY_DN41321_c0_g1_i1	1	p3	(CAC)5	15	972	986
		TRINITY_DN41307_c0_g2_i1	1	p3	(AGC)5	15	45	59
		TRINITY_DN41307_c0_g2_i2	1	p3	(AGC)5	15	45	59
		TRINITY_DN41397_c0_g1_i2	1	p3	(GAG)8	24	356	379
		TRINITY_DN41376_c2_g1_i8	1	p2	(CT)8	16	858	873
		TRINITY_DN41361_c0_g2_i3	1	p3	(CCT)5	15	809	823
		TRINITY_DN41338_c0_g1_i4	1	p3	(GGC)6	18	1467	1484
		TRINITY_DN41383_c0_g1_i4	1	p2	(CT)23	46	1308	1353
		TRINITY_DN41336_c1_g1_i1	1	p3	(GAG)6	18	1228	1245
		TRINITY_DN41336_c1_g1_i2	1	p3	(GAG)6	18	1477	1494
		TRINITY_DN41350_c0_g3_i1	1	p2	(TG)7	14	826	839
		TRINITY_DN41311_c1_g1_i1	1	c	(CT)10ccctctctctctatctctatcta(TC)17	77	156	232
		TRINITY_DN51024_c0_g1_i8	1	p3	(CCT)5	15	180	194
		TRINITY_DN51024_c0_g1_i3	1	c	(CCT)5ccatctgccccccttcctcgcgaccgcttctctcgcggcctccac(CT)9	78	180	257
		TRINITY_DN51044_c0_g1_i3	1	p1	(A)10	10	10	19
		TRINITY_DN51062_c0_g1_i1	1	p2	(TC)7	14	300	313
		TRINITY_DN51036_c0_g1_i3	1	p2	(TA)6	12	786	797
		TRINITY_DN51092_c2_g1_i1	1	p2	(TC)6	12	902	913
		TRINITY_DN51013_c0_g1_i2	1	p3	(GAT)6	18	971	988
		TRINITY_DN51010_c0_g1_i2	1	p3	(GCT)5	15	142	156
		TRINITY_DN11942_c0_g1_i1	1	p2	(TG)7	14	223	236
		TRINITY_DN11996_c0_g1_i2	1	p1	(A)10	10	1993	2002
		TRINITY_DN11996_c0_g1_i10	1	p1	(A)10	10	1992	2001
		TRINITY_DN11996_c0_g1_i7	1	p1	(A)10	10	1975	1984
		TRINITY_DN11996_c0_g1_i11	1	p1	(A)10	10	1974	1983
		TRINITY_DN11996_c0_g1_i8	1	p1	(A)10	10	1974	1983
		TRINITY_DN11996_c0_g1_i9	1	p3	(GGC)5	15	75	89
		TRINITY_DN11996_c0_g1_i9	2	p1	(A)10	10	1769	1778
		TRINITY_DN11996_c0_g1_i4	1	p3	(GGC)5	15	75	89
		TRINITY_DN11996_c0_g1_i6	1	p3	(GGC)5	15	75	89
		TRINITY_DN11996_c0_g1_i3	1	p1	(A)10	10	1993	2002
		TRINITY_DN11906_c0_g1_i5	1	p3	(CGA)5	15	95	109
		TRINITY_DN11906_c0_g1_i3	1	p3	(CGA)5	15	95	109
		TRINITY_DN11906_c0_g1_i2	1	p3	(CCT)5	15	81	95
		TRINITY_DN11934_c0_g1_i3	1	p1	(T)10	10	752	761
		TRINITY_DN11934_c0_g1_i1	1	p1	(T)10	10	795	804
		TRINITY_DN11934_c0_g1_i6	1	p1	(T)10	10	783	792
		TRINITY_DN11934_c0_g1_i4	1	p1	(T)10	10	631	640
		TRINITY_DN11995_c0_g1_i4	1	p3	(CAG)6	18	701	718
		TRINITY_DN11995_c0_g1_i7	1	p3	(CAG)7	21	701	721
		TRINITY_DN11995_c0_g1_i6	1	p3	(CAG)6	18	429	446
		TRINITY_DN11995_c0_g1_i2	1	p3	(CAG)7	21	475	495
		TRINITY_DN11995_c0_g1_i1	1	p3	(CAG)6	18	478	495
		TRINITY_DN11995_c0_g1_i8	1	p3	(CAG)6	18	590	607
		TRINITY_DN11995_c0_g1_i9	1	p3	(CAG)7	21	530	550
		TRINITY_DN11995_c0_g1_i5	1	p3	(CAG)6	18	761	778
		TRINITY_DN11995_c0_g1_i3	1	p3	(CAG)7	21	701	721
		TRINITY_DN11981_c0_g1_i5	1	p3	(CCA)5	15	120	134
		TRINITY_DN11981_c0_g1_i1	1	p3	(CCA)5	15	120	134
		TRINITY_DN11916_c0_g2_i1	1	p2	(TC)11	22	272	293
		TRINITY_DN11951_c0_g1_i6	1	p2	(TA)6	12	408	419
		TRINITY_DN11951_c0_g1_i8	1	p2	(TA)6	12	861	872
		TRINITY_DN11951_c0_g1_i4	1	p2	(TA)6	12	361	372
		TRINITY_DN11990_c0_g1_i7	1	p3	(GCT)6	18	453	470
		TRINITY_DN11990_c0_g1_i7	2	p3	(CGC)5	15	910	924
		TRINITY_DN11990_c0_g1_i2	1	p3	(GCT)6	18	453	470
		TRINITY_DN11990_c0_g1_i1	1	p3	(GCT)6	18	453	470
		TRINITY_DN11990_c0_g1_i3	1	p3	(GCT)7	21	453	473
		TRINITY_DN11990_c0_g1_i3	2	p3	(CGC)5	15	895	909
		TRINITY_DN11990_c0_g1_i4	1	p3	(GCT)7	21	453	473
		TRINITY_DN11990_c0_g1_i9	1	p3	(GCT)5	15	454	468
		TRINITY_DN11999_c0_g1_i11	1	p3	(AAG)5	15	264	278
		TRINITY_DN11999_c0_g1_i9	1	p3	(AAG)5	15	264	278
		TRINITY_DN11912_c0_g1_i4	1	p3	(TCC)6	18	191	208
		TRINITY_DN11912_c0_g1_i7	1	p3	(TCC)6	18	191	208
		TRINITY_DN11912_c0_g1_i3	1	p3	(TCC)6	18	191	208
		TRINITY_DN11994_c0_g1_i1	1	p1	(A)10	10	1104	1113
		TRINITY_DN11918_c2_g2_i1	1	p3	(CCA)6	18	147	164
		TRINITY_DN11966_c0_g1_i10	1	p2	(GT)6	12	618	629
		TRINITY_DN11966_c0_g1_i4	1	p2	(GT)6	12	599	610
		TRINITY_DN11907_c0_g1_i1	1	p3	(GAC)5	15	1171	1185
		TRINITY_DN11907_c0_g1_i2	1	p3	(GAT)5	15	1174	1188
		TRINITY_DN11907_c0_g1_i3	1	p3	(GAT)5	15	160	174
		TRINITY_DN11949_c0_g1_i2	1	p3	(CGC)5	15	517	531
		TRINITY_DN11910_c0_g1_i24	1	p1	(C)13	13	1939	1951
		TRINITY_DN11970_c0_g1_i8	1	p3	(CAC)7	21	85	105
		TRINITY_DN11976_c1_g1_i6	1	p3	(CAG)6	18	1748	1765
		TRINITY_DN11976_c1_g1_i1	1	p3	(CAG)6	18	1921	1938
		TRINITY_DN11940_c0_g2_i2	1	p3	(CGG)6	18	417	434
		TRINITY_DN11954_c0_g1_i7	1	p2	(AG)7	14	152	165
		TRINITY_DN11954_c0_g1_i7	2	p2	(CG)6	12	432	443
		TRINITY_DN11954_c0_g1_i3	1	p3	(CTT)8	24	141	164
		TRINITY_DN11954_c0_g1_i5	1	p3	(CTT)8	24	141	164
		TRINITY_DN11954_c0_g1_i2	1	p2	(AG)7	14	152	165
		TRINITY_DN11954_c0_g1_i2	2	p2	(CG)6	12	432	443
		TRINITY_DN11911_c0_g1_i14	1	p1	(T)10	10	1918	1927
		TRINITY_DN11911_c0_g1_i13	1	p1	(T)10	10	1904	1913
		TRINITY_DN11911_c0_g1_i5	1	p1	(T)10	10	1843	1852
		TRINITY_DN11911_c0_g1_i1	1	p1	(T)10	10	1905	1914
		TRINITY_DN11911_c0_g1_i7	1	p1	(T)10	10	1906	1915
		TRINITY_DN75009_c0_g1_i3	1	p3	(ATG)6	18	504	521
		TRINITY_DN75009_c0_g1_i1	1	p3	(ATG)6	18	429	446
		TRINITY_DN75054_c0_g1_i1	1	p3	(GAG)5	15	168	182
		TRINITY_DN75054_c0_g1_i5	1	p3	(GAG)5	15	168	182
		TRINITY_DN75071_c0_g1_i3	1	p1	(T)11	11	348	358
		TRINITY_DN75053_c0_g1_i1	1	p2	(AG)17	34	169	202
		TRINITY_DN10200_c0_g1_i5	1	p3	(CCT)6	18	187	204
		TRINITY_DN10267_c0_g1_i4	1	p3	(GCC)6	18	252	269
		TRINITY_DN10250_c0_g1_i9	1	p2	(TG)23	46	860	905
		TRINITY_DN10250_c0_g1_i4	1	p2	(TG)12	24	821	844
		TRINITY_DN10250_c0_g1_i5	1	p2	(TG)11	22	860	881
		TRINITY_DN10250_c0_g1_i10	1	p3	(CGC)5	15	242	256
		TRINITY_DN10250_c0_g1_i10	2	p2	(TG)11	22	842	863
		TRINITY_DN10250_c0_g1_i8	1	p2	(TG)11	22	836	857
		TRINITY_DN10250_c0_g1_i1	1	p3	(CGC)5	15	242	256
		TRINITY_DN10250_c0_g2_i3	1	p2	(TG)9	18	701	718
		TRINITY_DN10250_c0_g2_i2	1	p2	(GT)12	24	537	560
		TRINITY_DN10250_c0_g2_i1	1	p2	(TG)9	18	701	718
		TRINITY_DN10250_c2_g1_i1	1	p2	(CA)11	22	45	66
		TRINITY_DN10261_c0_g2_i1	1	p1	(A)10	10	199	208
		TRINITY_DN10261_c0_g3_i1	1	p2	(CA)6	12	46	57
		TRINITY_DN10229_c0_g1_i5	1	p3	(CGC)5	15	270	284
		TRINITY_DN10281_c0_g1_i2	1	p3	(CGG)6	18	39	56
		TRINITY_DN10281_c0_g1_i3	1	p1	(T)10	10	898	907
		TRINITY_DN10281_c1_g1_i4	1	p3	(CGG)8	24	87	110
		TRINITY_DN10281_c1_g1_i2	1	p3	(CGG)8	24	87	110
		TRINITY_DN10281_c1_g1_i6	1	p3	(CGG)8	24	87	110
		TRINITY_DN10281_c1_g1_i7	1	p3	(GGC)7	21	5	25
		TRINITY_DN10281_c1_g1_i1	1	p3	(CGG)8	24	87	110
		TRINITY_DN10281_c2_g1_i1	1	p3	(GCG)7	21	581	601
		TRINITY_DN10269_c0_g1_i11	1	p1	(A)11	11	1034	1044
		TRINITY_DN10269_c0_g1_i12	1	p1	(A)11	11	1034	1044
		TRINITY_DN10269_c0_g1_i9	1	p1	(T)10	10	1825	1834
		TRINITY_DN10269_c0_g1_i10	1	p1	(T)10	10	2963	2972
		TRINITY_DN10269_c0_g1_i16	1	p1	(A)11	11	1034	1044
		TRINITY_DN10269_c0_g1_i13	1	p1	(A)11	11	1140	1150
		TRINITY_DN10269_c0_g1_i3	1	p1	(T)10	10	1718	1727
		TRINITY_DN10262_c0_g1_i3	1	p2	(GA)12	24	47	70
		TRINITY_DN10262_c0_g1_i1	1	p2	(GA)8	16	47	62
		TRINITY_DN10262_c0_g1_i6	1	p2	(GA)12	24	47	70
		TRINITY_DN10262_c0_g1_i4	1	p2	(GA)8	16	47	62
		TRINITY_DN10223_c0_g1_i3	1	p3	(ACT)5	15	1222	1236
		TRINITY_DN10223_c0_g1_i2	1	p3	(ACT)5	15	1222	1236
		TRINITY_DN10223_c0_g1_i7	1	p3	(ACT)5	15	1222	1236
		TRINITY_DN10223_c0_g1_i11	1	p3	(ACT)5	15	1253	1267
		TRINITY_DN10223_c0_g1_i1	1	p3	(ACT)5	15	815	829
		TRINITY_DN10223_c0_g1_i5	1	p3	(ACT)5	15	1222	1236
		TRINITY_DN10223_c0_g1_i6	1	p3	(ACT)5	15	1253	1267
		TRINITY_DN10223_c0_g1_i9	1	p3	(ACT)5	15	1210	1224
		TRINITY_DN10257_c0_g1_i5	1	p3	(CGC)5	15	228	242
		TRINITY_DN10257_c0_g1_i6	1	p2	(TC)6	12	35	46
		TRINITY_DN10257_c0_g1_i1	1	p2	(TC)6	12	35	46
		TRINITY_DN10257_c0_g1_i10	1	p3	(CGC)5	15	228	242
		TRINITY_DN10217_c0_g1_i2	1	p3	(GCC)5	15	409	423
		TRINITY_DN10217_c0_g1_i3	1	p3	(GCC)5	15	412	426
		TRINITY_DN10217_c0_g1_i5	1	p3	(CGC)5	15	218	232
		TRINITY_DN10273_c0_g1_i1	1	p3	(CTC)5	15	186	200
		TRINITY_DN10268_c0_g1_i9	1	p2	(TG)6	12	1580	1591
		TRINITY_DN10268_c0_g1_i9	2	p2	(GC)6	12	1705	1716
		TRINITY_DN10268_c0_g1_i2	1	p2	(TG)6	12	1526	1537
		TRINITY_DN10268_c0_g1_i1	1	p2	(TG)6	12	1575	1586
		TRINITY_DN10268_c0_g1_i1	2	p2	(GC)6	12	1700	1711
		TRINITY_DN10268_c0_g1_i7	1	p2	(TG)6	12	1580	1591
		TRINITY_DN10268_c0_g1_i15	1	p2	(TG)6	12	1521	1532
		TRINITY_DN10268_c0_g1_i10	1	p2	(TG)6	12	1575	1586
		TRINITY_DN10268_c0_g1_i3	1	p2	(TG)6	12	117	128
		TRINITY_DN10268_c0_g1_i4	1	p2	(TG)6	12	1521	1532
		TRINITY_DN10206_c0_g1_i2	1	p3	(CAC)7	21	251	271
		TRINITY_DN10206_c0_g1_i6	1	p3	(CAC)7	21	251	271
		TRINITY_DN10206_c0_g1_i1	1	p3	(CAC)7	21	101	121
		TRINITY_DN10206_c0_g1_i4	1	p2	(CT)6	12	103	114
		TRINITY_DN10206_c0_g1_i4	2	p3	(CAC)7	21	263	283
		TRINITY_DN10206_c0_g1_i5	1	c	(CT)6aaccacccactctcgtcagtcatcacccccaccacaaccccatgctctccaccatttccatcgacagttactg(CT)6	97	18	114
		TRINITY_DN10206_c0_g1_i5	2	p3	(CAC)7	21	263	283
		TRINITY_DN10206_c0_g1_i3	1	p3	(CAC)7	21	101	121
		TRINITY_DN10206_c1_g1_i1	1	p3	(CAG)5	15	489	503
		TRINITY_DN10206_c1_g1_i2	1	p3	(CAG)5	15	445	459
		TRINITY_DN10209_c0_g1_i2	1	p3	(AGG)5	15	409	423
		TRINITY_DN10292_c0_g1_i1	1	p3	(CCG)5	15	3566	3580
		TRINITY_DN10292_c0_g1_i8	1	p3	(CCG)5	15	2715	2729
		TRINITY_DN10292_c0_g1_i9	1	p3	(CCG)5	15	3081	3095
		TRINITY_DN10292_c0_g1_i5	1	p3	(CCG)5	15	1517	1531
		TRINITY_DN10292_c0_g1_i3	1	p3	(GCC)5	15	3453	3467
		TRINITY_DN10292_c0_g1_i10	1	p3	(CCG)5	15	2966	2980
		TRINITY_DN10292_c0_g1_i2	1	p3	(CCG)5	15	2002	2016
		TRINITY_DN10292_c0_g1_i7	1	p3	(CCG)5	15	3200	3214
		TRINITY_DN10294_c0_g1_i14	1	p3	(GGA)6	18	36	53
		TRINITY_DN10294_c0_g1_i5	1	p3	(GGA)6	18	36	53
		TRINITY_DN10294_c0_g1_i7	1	p3	(GGA)6	18	36	53
		TRINITY_DN10277_c0_g1_i3	1	p1	(A)13	13	759	771
		TRINITY_DN10277_c0_g1_i1	1	p1	(A)11	11	752	762
		TRINITY_DN10235_c0_g2_i1	1	p1	(T)10	10	935	944
		TRINITY_DN10291_c0_g1_i9	1	p3	(ATG)5	15	2142	2156
		TRINITY_DN10295_c0_g1_i3	1	p1	(T)10	10	205	214
		TRINITY_DN10233_c0_g1_i4	1	p1	(T)11	11	2039	2049
		TRINITY_DN10233_c0_g1_i2	1	p1	(T)11	11	2033	2043
		TRINITY_DN10233_c0_g1_i3	1	p1	(T)11	11	3539	3549
		TRINITY_DN10265_c0_g1_i1	1	p3	(TCC)7	21	653	673
		TRINITY_DN10225_c0_g1_i1	1	p3	(TGC)6	18	115	132
		TRINITY_DN10220_c0_g1_i1	1	p3	(CAG)7	21	2462	2482
		TRINITY_DN10220_c0_g1_i6	1	p3	(CAG)7	21	2477	2497
		TRINITY_DN10220_c0_g1_i3	1	p3	(CAG)7	21	2462	2482
		TRINITY_DN10266_c0_g1_i5	1	p1	(T)10	10	1003	1012
		TRINITY_DN10249_c0_g2_i2	1	p2	(AG)8	16	786	801
		TRINITY_DN10249_c0_g2_i1	1	p2	(AG)8	16	786	801
		TRINITY_DN10224_c0_g1_i1	1	p2	(TC)7	14	141	154
		TRINITY_DN10224_c0_g1_i3	1	p2	(TC)7	14	141	154
		TRINITY_DN10224_c0_g1_i4	1	p2	(TC)7	14	141	154
		TRINITY_DN10224_c0_g2_i1	1	p3	(TCC)5	15	34	48
		TRINITY_DN10224_c0_g2_i6	1	p3	(TCC)5	15	34	48
		TRINITY_DN10212_c0_g1_i2	1	p3	(GGC)5	15	913	927
		TRINITY_DN10212_c0_g1_i3	1	p3	(GGC)5	15	636	650
		TRINITY_DN10212_c0_g1_i1	1	p3	(GGC)5	15	913	927
		TRINITY_DN10212_c0_g1_i5	1	p3	(GCG)5	15	484	498
		TRINITY_DN10212_c0_g1_i5	2	p3	(GGC)5	15	919	933
		TRINITY_DN10212_c0_g1_i4	1	p3	(GCG)5	15	490	504
		TRINITY_DN10212_c0_g1_i4	2	p3	(GGC)5	15	925	939
		TRINITY_DN10212_c1_g1_i2	1	c	(GCG)7gggggggccaagagaaaacagaagaaacgatccgacgatgcggacgaggagtacctcnnnnnnnncgggggcggcggcgaggaa(GAG)5	120	140	259
		TRINITY_DN10212_c1_g1_i4	1	c	(GCG)7gggggggccaagagaaaacagaagaaacgatccgacgatgcggacgaggagtacctcccgtccgacgggggcggcggcgaggaa(GAG)5	120	188	307
		TRINITY_DN10212_c1_g1_i1	1	c	(GCG)7gggggggccaagagaaaacagaagaaacgatccgacgatgcggacgaggagtacctcccgtccgacgggggcggcggcgaggaa(GAG)5	120	195	314
		TRINITY_DN10212_c1_g1_i5	1	c	(GCG)7gggggggccaagagaaaacagaagaaacgatccgacgatgcggacgaggagtacctcccgtccgacgggggcggcggcgaggaa(GAG)5	120	195	314
		TRINITY_DN10252_c0_g1_i8	1	p3	(CGG)6	18	189	206
		TRINITY_DN10252_c0_g1_i8	2	p1	(T)10	10	2218	2227
		TRINITY_DN10252_c0_g1_i1	1	p3	(CGG)6	18	189	206
		TRINITY_DN10252_c0_g1_i6	1	p3	(CGG)6	18	189	206
		TRINITY_DN10252_c0_g1_i6	2	p1	(T)10	10	2232	2241
		TRINITY_DN10252_c0_g1_i4	1	p3	(CGG)6	18	189	206
		TRINITY_DN10252_c0_g1_i4	2	p1	(T)10	10	2221	2230
		TRINITY_DN10252_c0_g1_i5	1	p3	(CGG)6	18	189	206
		TRINITY_DN10252_c0_g1_i2	1	p3	(CGG)6	18	189	206
		TRINITY_DN10252_c0_g1_i3	1	p3	(CGG)6	18	189	206
		TRINITY_DN10237_c1_g1_i3	1	p3	(GGC)6	18	58	75
		TRINITY_DN10237_c1_g1_i2	1	p3	(GGC)6	18	58	75
		TRINITY_DN10237_c1_g1_i1	1	p3	(GGC)5	15	66	80
		TRINITY_DN10296_c0_g1_i2	1	p3	(GCC)5	15	56	70
		TRINITY_DN10242_c1_g1_i1	1	p2	(GA)10	20	27	46
		TRINITY_DN10242_c1_g1_i2	1	p2	(GA)10	20	27	46
		TRINITY_DN10242_c1_g1_i5	1	p2	(GA)9	18	29	46
		TRINITY_DN10242_c1_g1_i4	1	p2	(GA)10	20	27	46
		TRINITY_DN10260_c1_g1_i5	1	p3	(CGA)5	15	45	59
		TRINITY_DN10219_c0_g1_i1	1	p3	(CGC)5	15	233	247
		TRINITY_DN10246_c0_g1_i6	1	p3	(GCC)5	15	252	266
		TRINITY_DN10246_c0_g1_i10	1	p3	(GCC)5	15	252	266
		TRINITY_DN10246_c0_g1_i5	1	p3	(GCC)5	15	252	266
		TRINITY_DN10246_c0_g1_i7	1	p3	(GCC)5	15	252	266
		TRINITY_DN10279_c0_g1_i2	1	p3	(CTC)5	15	35	49
		TRINITY_DN10274_c2_g1_i1	1	p1	(A)13	13	208	220
		TRINITY_DN38668_c0_g1_i1	1	p2	(GT)6	12	659	670
		TRINITY_DN38686_c0_g1_i2	1	p3	(TAG)6	18	1195	1212
		TRINITY_DN38602_c0_g1_i2	1	p2	(CA)6	12	68	79
		TRINITY_DN38602_c0_g1_i1	1	p2	(CA)6	12	68	79
		TRINITY_DN38640_c0_g1_i1	1	p3	(CCT)7	21	108	128
		TRINITY_DN38632_c0_g2_i1	1	p1	(T)10	10	426	435
		TRINITY_DN38697_c0_g3_i1	1	p3	(GTC)5	15	2487	2501
		TRINITY_DN38673_c0_g1_i4	1	p1	(C)10	10	171	180
		TRINITY_DN38629_c0_g2_i1	1	p1	(A)10	10	227	236
		TRINITY_DN38658_c1_g1_i1	1	p3	(CGC)5	15	138	152
		TRINITY_DN38611_c0_g5_i1	1	p1	(T)11	11	813	823
		TRINITY_DN38663_c0_g1_i5	1	p3	(GCG)5	15	348	362
		TRINITY_DN38664_c0_g1_i3	1	p2	(CT)15	30	45	74
		TRINITY_DN38693_c0_g1_i6	1	p2	(TA)6	12	350	361
		TRINITY_DN38693_c0_g1_i14	1	p2	(TA)6	12	261	272
		TRINITY_DN38607_c0_g1_i2	1	p2	(TC)7	14	136	149
		TRINITY_DN38666_c0_g1_i6	1	p1	(A)10	10	614	623
		TRINITY_DN38665_c0_g2_i1	1	p1	(A)10	10	502	511
		TRINITY_DN38665_c0_g3_i1	1	p1	(A)11	11	2896	2906
		TRINITY_DN46491_c0_g2_i2	1	p1	(A)12	12	361	372
		TRINITY_DN46430_c0_g1_i3	1	p3	(TGT)5	15	961	975
		TRINITY_DN46430_c0_g1_i2	1	p3	(GAG)5	15	749	763
		TRINITY_DN46448_c0_g1_i1	1	p3	(GCA)6	18	598	615
		TRINITY_DN46448_c0_g1_i3	1	p3	(GCA)6	18	537	554
		TRINITY_DN46429_c1_g1_i1	1	p1	(A)10	10	593	602
		TRINITY_DN46498_c0_g1_i1	1	p4	(CCTG)5	20	144	163
		TRINITY_DN46442_c0_g2_i1	1	p2	(CT)8	16	52	67
		TRINITY_DN46443_c0_g1_i4	1	p3	(GCG)5	15	133	147
		TRINITY_DN46443_c0_g1_i11	1	p3	(GCG)5	15	133	147
		TRINITY_DN46443_c0_g1_i8	1	p2	(AC)16	32	815	846
		TRINITY_DN24230_c0_g1_i2	1	p1	(G)12	12	314	325
		TRINITY_DN24267_c0_g3_i1	1	p3	(GAA)5	15	615	629
		TRINITY_DN24267_c0_g3_i2	1	p3	(GAA)5	15	1232	1246
		TRINITY_DN24267_c0_g3_i4	1	p2	(AG)6	12	146	157
		TRINITY_DN24267_c0_g3_i4	2	p3	(GAA)5	15	623	637
		TRINITY_DN24267_c1_g1_i2	1	p1	(A)10	10	90	99
		TRINITY_DN24216_c0_g1_i3	1	p3	(CGG)6	18	168	185
		TRINITY_DN24249_c0_g1_i1	1	p3	(AGC)5	15	35	49
		TRINITY_DN24249_c0_g1_i2	1	p3	(AAG)7	21	117	137
		TRINITY_DN24249_c1_g1_i2	1	p3	(GGC)5	15	320	334
		TRINITY_DN24249_c1_g1_i1	1	p3	(GGC)5	15	199	213
		TRINITY_DN24249_c2_g1_i1	1	p2	(TC)7	14	75	88
		TRINITY_DN24288_c0_g2_i12	1	p3	(GCA)5	15	199	213
		TRINITY_DN24218_c0_g2_i3	1	p3	(GCG)7	21	36	56
		TRINITY_DN24218_c0_g2_i4	1	p3	(GCG)7	21	36	56
		TRINITY_DN24270_c0_g1_i2	1	c	(T)11ggcgttatggttcaggtgtga(T)15	47	991	1037
		TRINITY_DN24270_c0_g1_i8	1	c	(T)11ggcgttatggttcaggtgtga(T)15	47	1307	1353
		TRINITY_DN24292_c0_g3_i3	1	p3	(GCT)5	15	14	28
		TRINITY_DN24292_c0_g3_i4	1	p3	(GCT)5	15	14	28
		TRINITY_DN24292_c0_g3_i1	1	p3	(GCT)5	15	14	28
		TRINITY_DN24255_c0_g1_i1	1	p2	(TC)13	26	41	66
		TRINITY_DN24255_c0_g1_i2	1	p2	(TC)13	26	41	66
		TRINITY_DN24255_c3_g1_i1	1	p2	(GA)15	30	27	56
		TRINITY_DN24255_c3_g1_i1	2	p1	(T)12	12	2376	2387
		TRINITY_DN24225_c0_g2_i2	1	p2	(TA)6	12	279	290
		TRINITY_DN24225_c0_g3_i1	1	p1	(T)10	10	227	236
		TRINITY_DN24253_c0_g1_i3	1	p1	(A)10	10	395	404
		TRINITY_DN24207_c0_g1_i5	1	p3	(CTG)5	15	293	307
		TRINITY_DN24268_c0_g1_i3	1	p1	(T)10	10	331	340
		TRINITY_DN24227_c0_g1_i5	1	p2	(GT)8	16	84	99
		TRINITY_DN24227_c0_g1_i8	1	p2	(GT)7	14	786	799
		TRINITY_DN24227_c0_g1_i13	1	p2	(GT)7	14	744	757
		TRINITY_DN24227_c0_g1_i1	1	p2	(GT)7	14	1111	1124
		TRINITY_DN24227_c0_g1_i7	1	p2	(GT)7	14	744	757
		TRINITY_DN24227_c0_g1_i6	1	p2	(GT)7	14	778	791
		TRINITY_DN24227_c0_g1_i9	1	p2	(GT)7	14	1799	1812
		TRINITY_DN24227_c0_g1_i3	1	p2	(GT)8	16	135	150
		TRINITY_DN24227_c0_g1_i10	1	p2	(GT)7	14	1450	1463
		TRINITY_DN24298_c0_g1_i3	1	p4	(GCCT)6	24	30	53
		TRINITY_DN24278_c0_g1_i2	1	p1	(T)10	10	381	390
		TRINITY_DN24277_c0_g2_i3	1	p2	(AG)6	12	2038	2049
		TRINITY_DN24277_c0_g2_i6	1	c	(AG)6aaagagaagcaggatgcggggcttgc(AG)6	50	2038	2087
		TRINITY_DN24277_c0_g2_i5	1	c	(AG)6aaagagaagcaggatgcggggcttgc(AG)6	50	1669	1718
		TRINITY_DN24266_c0_g2_i3	1	p4	(CACG)5	20	692	711
		TRINITY_DN24285_c0_g1_i1	1	p3	(ATT)7	21	332	352
		TRINITY_DN24261_c0_g1_i6	1	p1	(T)10	10	1580	1589
		TRINITY_DN24211_c0_g2_i4	1	p3	(GAA)5	15	121	135
		TRINITY_DN24258_c1_g2_i1	1	p1	(T)10	10	375	384
		TRINITY_DN83293_c0_g1_i2	1	p2	(CT)19	38	440	477
		TRINITY_DN83293_c0_g1_i1	1	p4	(CGAG)5	20	61	80
		TRINITY_DN83293_c0_g1_i1	2	p2	(CT)19	38	380	417
		TRINITY_DN83293_c0_g1_i3	1	p2	(CT)17	34	189	222
		TRINITY_DN83293_c0_g2_i1	1	p2	(GA)6	12	72	83
		TRINITY_DN83292_c0_g1_i1	1	p1	(T)11	11	167	177
		TRINITY_DN83266_c0_g1_i2	1	p1	(A)10	10	112	121
[truncated: 1,631 more rows]

## Sheet: Mutant+HS-R1
		Insight into the mechanisms of terminal HS-tolerance in wheat mutant with improved nutritional quality through de novo transcriptome sequencing Ranjeet R. Kumar, Suman Bakshi, Kavita Dubey, Sumedha Hasija, Gyanendra K. Rai, Neelu Jain, Sanjay Jambhulkar, Bhupinder Singh, Gyanendra P. Singh, & Shelly Praveen
[truncated: 33,880 more rows]

[truncated: 1 more sheets: Mutant+HS-R2]
