# Supplementary material for: Insight into the mechanisms of terminal HS-tolerance in wheat mutant with improved nutritional quality through de novo transcriptome sequencing
Source: Research Square preprint supplement (doi:10.21203/rs.3.rs-241832/v1), 2021-02-26
Supplement: Supplementary file 17 [file 217f09b2706e2c912168c255.xlsx]

## Sheet: Sheet1
		Insight into the mechanisms of terminal HS-tolerance in wheat mutant with improved nutritional quality through de novo transcriptome sequencing Ranjeet R. Kumar, Suman Bakshi, Kavita Dubey, Sumedha Hasija, Gyanendra K. Rai, Neelu Jain, Sanjay Jambhulkar, Bhupinder Singh, Gyanendra P. Singh, & Shelly Praveen
		Table S5 Gene Ontology (GO) analysis of annotated transcripts and their categorization into biological process, molecular function and cellular component
		qseqid	protein_name	GO	biological process	molecular function	cellular component
		TRINITY_DN69561_c0_g1_i6	Uncharacterized protein
		TRINITY_DN69561_c0_g1_i5	Uncharacterized protein
		TRINITY_DN69561_c1_g1_i1	Uncharacterized protein	GO:0003676		nucleic acid binding [GO:0003676]
		TRINITY_DN69561_c1_g2_i1	Uncharacterized protein
		TRINITY_DN69511_c0_g1_i3	Uncharacterized protein
		TRINITY_DN69511_c0_g1_i4	Uncharacterized protein
		TRINITY_DN69511_c0_g1_i1	Uncharacterized protein
		TRINITY_DN69511_c0_g1_i2	Uncharacterized protein
		TRINITY_DN69511_c0_g2_i1	Uncharacterized protein	GO:0003950		NAD+ ADP-ribosyltransferase activity [GO:0003950]
		TRINITY_DN69569_c0_g1_i1	Uncharacterized protein
		TRINITY_DN69569_c0_g2_i2	Uncharacterized protein
		TRINITY_DN69569_c0_g2_i1	Uncharacterized protein
		TRINITY_DN69500_c0_g1_i1	Uncharacterized protein	GO:0016787;GO:0016042	lipid catabolic process [GO:0016042]	hydrolase activity [GO:0016787]
		TRINITY_DN69500_c0_g1_i2	Uncharacterized protein	GO:0016787;GO:0016042	lipid catabolic process [GO:0016042]	hydrolase activity [GO:0016787]
		TRINITY_DN69542_c0_g1_i3	Uncharacterized protein	GO:0005739			mitochondrion [GO:0005739]
		TRINITY_DN69542_c0_g1_i1	Uncharacterized protein	GO:0005739			mitochondrion [GO:0005739]
		TRINITY_DN69542_c0_g1_i6	Uncharacterized protein	GO:0005739			mitochondrion [GO:0005739]
		TRINITY_DN69542_c0_g1_i2	Uncharacterized protein	GO:0005739			mitochondrion [GO:0005739]
		TRINITY_DN69542_c0_g1_i5	Uncharacterized protein	GO:0005739			mitochondrion [GO:0005739]
		TRINITY_DN69554_c0_g1_i2	Uncharacterized protein
		TRINITY_DN69507_c0_g1_i1	Uncharacterized protein	GO:0043531		ADP binding [GO:0043531]
		TRINITY_DN69589_c0_g1_i3	Similar to No apical meristem	GO:0003677;GO:0006355	regulation of transcription, DNA-templated [GO:0006355]	DNA binding [GO:0003677]
		TRINITY_DN69589_c0_g1_i1	Similar to No apical meristem	GO:0003677;GO:0006355	regulation of transcription, DNA-templated [GO:0006355]	DNA binding [GO:0003677]
		TRINITY_DN69589_c0_g1_i6	Uncharacterized protein	GO:0005634;GO:0003677;GO:0006355;GO:0006351	regulation of transcription, DNA-templated [GO:0006355];transcription, DNA-templated [GO:0006351]	DNA binding [GO:0003677]	nucleus [GO:0005634]
		TRINITY_DN69589_c0_g1_i7	Chromosome 3B-specific BAC library, contig ctg0464b	GO:0005634;GO:0003677;GO:0006355;GO:0006351	regulation of transcription, DNA-templated [GO:0006355];transcription, DNA-templated [GO:0006351]	DNA binding [GO:0003677]	nucleus [GO:0005634]
		TRINITY_DN69589_c0_g1_i5	Similar to No apical meristem	GO:0003677;GO:0006355	regulation of transcription, DNA-templated [GO:0006355]	DNA binding [GO:0003677]
		TRINITY_DN69589_c0_g1_i4	NAC domain containing protein 75	GO:0005634;GO:0003677;GO:0006355;GO:0006351	regulation of transcription, DNA-templated [GO:0006355];transcription, DNA-templated [GO:0006351]	DNA binding [GO:0003677]	nucleus [GO:0005634]
		TRINITY_DN69589_c0_g1_i2	NAC domain containing protein 75	GO:0005634;GO:0003677;GO:0006355;GO:0006351	regulation of transcription, DNA-templated [GO:0006355];transcription, DNA-templated [GO:0006351]	DNA binding [GO:0003677]	nucleus [GO:0005634]
		TRINITY_DN69589_c0_g2_i1	Similar to No apical meristem	GO:0003677;GO:0006355	regulation of transcription, DNA-templated [GO:0006355]	DNA binding [GO:0003677]
		TRINITY_DN69557_c0_g1_i1	Uncharacterized protein	GO:0043531		ADP binding [GO:0043531]
		TRINITY_DN69539_c0_g1_i2	Uncharacterized protein
		TRINITY_DN69539_c0_g1_i1	Uncharacterized protein
		TRINITY_DN69537_c0_g1_i1	Dirigent protein	GO:0048046;GO:0016853		isomerase activity [GO:0016853]	apoplast [GO:0048046]
		TRINITY_DN69522_c0_g1_i4	Uncharacterized protein
		TRINITY_DN69522_c0_g1_i3	Uncharacterized protein
		TRINITY_DN69522_c0_g1_i6	Uncharacterized protein
		TRINITY_DN69522_c0_g1_i1	Uncharacterized protein
		TRINITY_DN69522_c0_g1_i2	Uncharacterized protein
		TRINITY_DN69532_c0_g1_i1	Uncharacterized protein
		TRINITY_DN69551_c0_g1_i1	Uncharacterized protein	GO:0005634;GO:0004402;GO:0003712;GO:0008270;GO:0006355	regulation of transcription, DNA-templated [GO:0006355]	histone acetyltransferase activity [GO:0004402];transcription cofactor activity [GO:0003712];zinc ion binding [GO:0008270]	nucleus [GO:0005634]
		TRINITY_DN69515_c0_g1_i1	Uncharacterized protein	GO:0016021			integral component of membrane [GO:0016021]
		TRINITY_DN69544_c0_g1_i1	Proteasome subunit beta type-5-A	GO:0005634;GO:0005839;GO:0043531;GO:0004298;GO:0051603	proteolysis involved in cellular protein catabolic process [GO:0051603]	ADP binding [GO:0043531];threonine-type endopeptidase activity [GO:0004298]	nucleus [GO:0005634];proteasome core complex [GO:0005839]
		TRINITY_DN69587_c0_g1_i1	Uncharacterized protein	GO:0016021			integral component of membrane [GO:0016021]
		TRINITY_DN69577_c0_g1_i2	Peroxidase	GO:0020037;GO:0004601;GO:0006979	response to oxidative stress [GO:0006979]	heme binding [GO:0020037];peroxidase activity [GO:0004601]
		TRINITY_DN69577_c0_g1_i7	Peroxidase	GO:0020037;GO:0004601;GO:0006979	response to oxidative stress [GO:0006979]	heme binding [GO:0020037];peroxidase activity [GO:0004601]
		TRINITY_DN69577_c0_g1_i5	Peroxidase	GO:0020037;GO:0004601;GO:0006979	response to oxidative stress [GO:0006979]	heme binding [GO:0020037];peroxidase activity [GO:0004601]
		TRINITY_DN69577_c0_g1_i6	Peroxidase	GO:0020037;GO:0004601;GO:0006979	response to oxidative stress [GO:0006979]	heme binding [GO:0020037];peroxidase activity [GO:0004601]
		TRINITY_DN69577_c0_g1_i3	Peroxidase	GO:0020037;GO:0004601;GO:0006979	response to oxidative stress [GO:0006979]	heme binding [GO:0020037];peroxidase activity [GO:0004601]
		TRINITY_DN69577_c0_g1_i4	Peroxidase	GO:0005576;GO:0020037;GO:0046872;GO:0004601;GO:0042744;GO:0006979	hydrogen peroxide catabolic process [GO:0042744];response to oxidative stress [GO:0006979]	heme binding [GO:0020037];metal ion binding [GO:0046872];peroxidase activity [GO:0004601]	extracellular region [GO:0005576]
		TRINITY_DN69547_c0_g1_i2	Uncharacterized protein	GO:0016491		oxidoreductase activity [GO:0016491]
		TRINITY_DN69547_c0_g1_i1	Uncharacterized protein	GO:0016491		oxidoreductase activity [GO:0016491]
		TRINITY_DN69571_c0_g1_i1	Uncharacterized protein
		TRINITY_DN69571_c0_g1_i4	Uncharacterized protein
		TRINITY_DN69571_c0_g1_i2	Uncharacterized protein
		TRINITY_DN69571_c0_g1_i3	Uncharacterized protein
		TRINITY_DN69525_c0_g1_i1	Uncharacterized protein	GO:0004076;GO:0051536;GO:0009102	biotin biosynthetic process [GO:0009102]	biotin synthase activity [GO:0004076];iron-sulfur cluster binding [GO:0051536]
		TRINITY_DN69591_c0_g1_i3	Uncharacterized protein	GO:0051260	protein homooligomerization [GO:0051260]
		TRINITY_DN69591_c0_g1_i1	Uncharacterized protein	GO:0051260	protein homooligomerization [GO:0051260]
		TRINITY_DN69591_c0_g1_i4	Uncharacterized protein	GO:0051260	protein homooligomerization [GO:0051260]
		TRINITY_DN69591_c0_g1_i2	Uncharacterized protein	GO:0051260	protein homooligomerization [GO:0051260]
		TRINITY_DN69572_c0_g1_i2	Uncharacterized protein	GO:0003690;GO:0006355	regulation of transcription, DNA-templated [GO:0006355]	double-stranded DNA binding [GO:0003690]
		TRINITY_DN69572_c0_g1_i1	Uncharacterized protein	GO:0003690;GO:0006355	regulation of transcription, DNA-templated [GO:0006355]	double-stranded DNA binding [GO:0003690]
		TRINITY_DN69572_c0_g2_i1	Uncharacterized protein	GO:0003690;GO:0006355	regulation of transcription, DNA-templated [GO:0006355]	double-stranded DNA binding [GO:0003690]
		TRINITY_DN69590_c0_g1_i1	Uncharacterized protein	GO:0006355;GO:0006351	regulation of transcription, DNA-templated [GO:0006355];transcription, DNA-templated [GO:0006351]
		TRINITY_DN69552_c0_g1_i2	Uncharacterized protein	GO:0016021			integral component of membrane [GO:0016021]
		TRINITY_DN69552_c0_g1_i1	Uncharacterized protein
		TRINITY_DN69552_c0_g1_i6	Uncharacterized protein
		TRINITY_DN69552_c0_g1_i3	Uncharacterized protein	GO:0016021			integral component of membrane [GO:0016021]
		TRINITY_DN69552_c0_g1_i7	Uncharacterized protein	GO:0016021			integral component of membrane [GO:0016021]
		TRINITY_DN69552_c0_g1_i4	Uncharacterized protein	GO:0016021			integral component of membrane [GO:0016021]
		TRINITY_DN69552_c1_g1_i3	Uncharacterized protein	GO:0016021			integral component of membrane [GO:0016021]
		TRINITY_DN69552_c1_g1_i2	Uncharacterized protein	GO:0016021			integral component of membrane [GO:0016021]
		TRINITY_DN69553_c0_g1_i2	Uncharacterized protein
		TRINITY_DN69595_c0_g1_i1	Uncharacterized protein	GO:0005622;GO:0016301;GO:0046854;GO:0048015	phosphatidylinositol phosphorylation [GO:0046854];phosphatidylinositol-mediated signaling [GO:0048015]	kinase activity [GO:0016301]	intracellular [GO:0005622]
		TRINITY_DN69595_c0_g1_i2	Uncharacterized protein	GO:0005622;GO:0016301;GO:0046854;GO:0048015	phosphatidylinositol phosphorylation [GO:0046854];phosphatidylinositol-mediated signaling [GO:0048015]	kinase activity [GO:0016301]	intracellular [GO:0005622]
		TRINITY_DN69566_c0_g1_i1	Uncharacterized protein
		TRINITY_DN69566_c0_g1_i2	Uncharacterized protein
		TRINITY_DN69584_c0_g1_i1	Uncharacterized protein	GO:0016021;GO:0005524;GO:0030246;GO:0004672		ATP binding [GO:0005524];carbohydrate binding [GO:0030246];protein kinase activity [GO:0004672]	integral component of membrane [GO:0016021]
		TRINITY_DN69584_c1_g1_i1	Uncharacterized protein	GO:0016021;GO:0005524;GO:0030246;GO:0004672		ATP binding [GO:0005524];carbohydrate binding [GO:0030246];protein kinase activity [GO:0004672]	integral component of membrane [GO:0016021]
		TRINITY_DN69513_c0_g1_i7	Uncharacterized protein	GO:0005634;GO:0003677;GO:0006355;GO:0006351	regulation of transcription, DNA-templated [GO:0006355];transcription, DNA-templated [GO:0006351]	DNA binding [GO:0003677]	nucleus [GO:0005634]
		TRINITY_DN69513_c0_g1_i1	Uncharacterized protein	GO:0005634;GO:0003677;GO:0006355;GO:0006351	regulation of transcription, DNA-templated [GO:0006355];transcription, DNA-templated [GO:0006351]	DNA binding [GO:0003677]	nucleus [GO:0005634]
		TRINITY_DN69513_c0_g1_i9	Uncharacterized protein	GO:0005634;GO:0003677;GO:0006355;GO:0006351	regulation of transcription, DNA-templated [GO:0006355];transcription, DNA-templated [GO:0006351]	DNA binding [GO:0003677]	nucleus [GO:0005634]
		TRINITY_DN69513_c0_g1_i5	Uncharacterized protein	GO:0005634;GO:0003677;GO:0006355;GO:0006351	regulation of transcription, DNA-templated [GO:0006355];transcription, DNA-templated [GO:0006351]	DNA binding [GO:0003677]	nucleus [GO:0005634]
		TRINITY_DN69513_c0_g1_i4	Uncharacterized protein	GO:0005634;GO:0003677;GO:0006355;GO:0006351	regulation of transcription, DNA-templated [GO:0006355];transcription, DNA-templated [GO:0006351]	DNA binding [GO:0003677]	nucleus [GO:0005634]
		TRINITY_DN69534_c0_g1_i2	Uncharacterized protein	GO:0071949		FAD binding [GO:0071949]
		TRINITY_DN69534_c0_g1_i1	Putative polyketide hydroxylase	GO:0071949		FAD binding [GO:0071949]
		TRINITY_DN69580_c0_g1_i1	Uncharacterized protein
		TRINITY_DN69580_c0_g1_i2	Uncharacterized protein
		TRINITY_DN69580_c0_g2_i2	Uncharacterized protein
		TRINITY_DN69580_c0_g2_i1	Uncharacterized protein
		TRINITY_DN69505_c0_g2_i1	Uncharacterized protein
		TRINITY_DN69558_c1_g1_i4	Uncharacterized protein
		TRINITY_DN69558_c1_g1_i2	Uncharacterized protein
		TRINITY_DN69531_c0_g1_i1	Uncharacterized protein
		TRINITY_DN69509_c0_g1_i1	Uncharacterized protein	GO:0046872		metal ion binding [GO:0046872]
		TRINITY_DN69574_c0_g1_i1	Uncharacterized protein
		TRINITY_DN69574_c0_g1_i2	Uncharacterized protein
		TRINITY_DN69574_c0_g1_i3	Uncharacterized protein
		TRINITY_DN69574_c0_g2_i1	Uncharacterized protein	GO:0016021			integral component of membrane [GO:0016021]
		TRINITY_DN69574_c0_g3_i1	Uncharacterized protein	GO:0016021			integral component of membrane [GO:0016021]
		TRINITY_DN69574_c1_g1_i1	Uncharacterized protein	GO:0016021			integral component of membrane [GO:0016021]
		TRINITY_DN69574_c2_g1_i1	Uncharacterized protein
		TRINITY_DN69548_c0_g1_i1	Seryl-tRNA synthetase	GO:0005737;GO:0005524;GO:0004828;GO:0006434	seryl-tRNA aminoacylation [GO:0006434]	ATP binding [GO:0005524];serine-tRNA ligase activity [GO:0004828]	cytoplasm [GO:0005737]
		TRINITY_DN69548_c0_g1_i2	Seryl-tRNA synthetase	GO:0005737;GO:0005524;GO:0004828;GO:0006434	seryl-tRNA aminoacylation [GO:0006434]	ATP binding [GO:0005524];serine-tRNA ligase activity [GO:0004828]	cytoplasm [GO:0005737]
		TRINITY_DN69506_c0_g1_i1	Uncharacterized protein
		TRINITY_DN69502_c0_g1_i1	Kinesin-like protein	GO:0005874;GO:0005524;GO:0008017;GO:0003777;GO:0007018	microtubule-based movement [GO:0007018]	ATP binding [GO:0005524];microtubule binding [GO:0008017];microtubule motor activity [GO:0003777]	microtubule [GO:0005874]
		TRINITY_DN69527_c0_g1_i1	Uncharacterized protein
		TRINITY_DN69527_c0_g2_i2	Glycosyltransferase	GO:0016758;GO:0008152	metabolic process [GO:0008152]	transferase activity, transferring hexosyl groups [GO:0016758]
		TRINITY_DN69527_c0_g2_i1	Glycosyltransferase	GO:0016758;GO:0008152	metabolic process [GO:0008152]	transferase activity, transferring hexosyl groups [GO:0016758]
		TRINITY_DN69527_c0_g3_i3	Uncharacterized protein	GO:0016021			integral component of membrane [GO:0016021]
		TRINITY_DN69527_c0_g5_i1	Glycosyltransferase	GO:0016758;GO:0008152	metabolic process [GO:0008152]	transferase activity, transferring hexosyl groups [GO:0016758]
		TRINITY_DN69593_c0_g1_i1	Diphosphomevalonate decarboxylase; Mevalonate pyrophosphate decarboxylase	GO:0005829;GO:0005524;GO:0004163;GO:0019287;GO:0016126	isopentenyl diphosphate biosynthetic process, mevalonate pathway [GO:0019287];sterol biosynthetic process [GO:0016126]	ATP binding [GO:0005524];diphosphomevalonate decarboxylase activity [GO:0004163]	cytosol [GO:0005829]
		TRINITY_DN69597_c0_g1_i1	Uncharacterized protein	GO:0016021			integral component of membrane [GO:0016021]
		TRINITY_DN69575_c0_g1_i5	Uncharacterized protein	GO:0016308;GO:0005524		1-phosphatidylinositol-4-phosphate 5-kinase activity [GO:0016308];ATP binding [GO:0005524]
		TRINITY_DN69575_c0_g1_i2	Uncharacterized protein	GO:0016308;GO:0005524		1-phosphatidylinositol-4-phosphate 5-kinase activity [GO:0016308];ATP binding [GO:0005524]
		TRINITY_DN69575_c0_g1_i3	Uncharacterized protein	GO:0016308;GO:0005524		1-phosphatidylinositol-4-phosphate 5-kinase activity [GO:0016308];ATP binding [GO:0005524]
		TRINITY_DN69575_c0_g1_i4	Uncharacterized protein	GO:0016308;GO:0005524		1-phosphatidylinositol-4-phosphate 5-kinase activity [GO:0016308];ATP binding [GO:0005524]
		TRINITY_DN69575_c1_g1_i1	Phosphatidylinositol 4-phosphate 5-kinase	GO:0016308;GO:0005524		1-phosphatidylinositol-4-phosphate 5-kinase activity [GO:0016308];ATP binding [GO:0005524]
		TRINITY_DN69523_c0_g1_i1	Uncharacterized protein
		TRINITY_DN69583_c0_g1_i1	Uncharacterized protein	GO:0005524;GO:0003677;GO:0004803;GO:0008270;GO:0006313	transposition, DNA-mediated [GO:0006313]	ATP binding [GO:0005524];DNA binding [GO:0003677];transposase activity [GO:0004803];zinc ion binding [GO:0008270]
		TRINITY_DN69579_c0_g1_i1	Uncharacterized protein	GO:0005525;GO:0003924		GTP binding [GO:0005525];GTPase activity [GO:0003924]
		TRINITY_DN69579_c2_g1_i1	Uncharacterized protein	GO:0005525;GO:0003924		GTP binding [GO:0005525];GTPase activity [GO:0003924]
		TRINITY_DN69517_c0_g1_i1	Uncharacterized protein	GO:0051015;GO:0051017	actin filament bundle assembly [GO:0051017]	actin filament binding [GO:0051015]
		TRINITY_DN28078_c0_g1_i1	Uncharacterized protein
		TRINITY_DN28078_c0_g1_i7	Uncharacterized protein
		TRINITY_DN28078_c0_g1_i9	Uncharacterized protein
		TRINITY_DN28078_c0_g1_i8	Uncharacterized protein
		TRINITY_DN28078_c0_g1_i2	Uncharacterized protein
		TRINITY_DN28078_c0_g1_i5	Uncharacterized protein
		TRINITY_DN28078_c0_g1_i4	Uncharacterized protein
		TRINITY_DN28056_c0_g1_i2	Uncharacterized protein
		TRINITY_DN28056_c0_g1_i3	Uncharacterized protein
		TRINITY_DN28056_c0_g2_i1	Uncharacterized protein
		TRINITY_DN28056_c3_g1_i1	Uncharacterized protein
		TRINITY_DN28052_c0_g1_i1	Uncharacterized protein
		TRINITY_DN28052_c1_g1_i1	Uncharacterized protein
		TRINITY_DN28052_c2_g1_i1	Uncharacterized protein
		TRINITY_DN28052_c3_g1_i1	Uncharacterized protein
		TRINITY_DN28085_c0_g2_i6	Uncharacterized protein
		TRINITY_DN28085_c0_g2_i11	Uncharacterized protein
		TRINITY_DN28085_c0_g2_i8	Uncharacterized protein
		TRINITY_DN28085_c0_g2_i4	Uncharacterized protein
		TRINITY_DN28085_c0_g2_i2	Uncharacterized protein
		TRINITY_DN28085_c0_g2_i10	Uncharacterized protein
		TRINITY_DN28085_c0_g2_i5	Uncharacterized protein
		TRINITY_DN28060_c0_g1_i2	Uncharacterized protein	GO:0010997;GO:0097027;GO:1904668	positive regulation of ubiquitin protein ligase activity [GO:1904668]	anaphase-promoting complex binding [GO:0010997];ubiquitin-protein transferase activator activity [GO:0097027]
		TRINITY_DN28060_c0_g1_i1	Uncharacterized protein	GO:0010997;GO:0097027;GO:1904668	positive regulation of ubiquitin protein ligase activity [GO:1904668]	anaphase-promoting complex binding [GO:0010997];ubiquitin-protein transferase activator activity [GO:0097027]
		TRINITY_DN28042_c0_g1_i1	Uncharacterized protein	GO:0005634;GO:0003682		chromatin binding [GO:0003682]	nucleus [GO:0005634]
		TRINITY_DN28006_c0_g1_i5	Uncharacterized protein
		TRINITY_DN28006_c0_g1_i6	Uncharacterized protein
		TRINITY_DN28006_c0_g1_i1	Uncharacterized protein
		TRINITY_DN28006_c0_g1_i4	Uncharacterized protein
		TRINITY_DN28006_c0_g1_i7	Uncharacterized protein
		TRINITY_DN28006_c0_g1_i12	Uncharacterized protein
		TRINITY_DN28006_c0_g1_i10	Uncharacterized protein
		TRINITY_DN28006_c0_g1_i8	Uncharacterized protein
		TRINITY_DN28006_c0_g1_i11	Uncharacterized protein
		TRINITY_DN28010_c0_g1_i5	Uncharacterized protein	GO:0003690;GO:0006355	regulation of transcription, DNA-templated [GO:0006355]	double-stranded DNA binding [GO:0003690]
		TRINITY_DN28010_c0_g1_i1	Uncharacterized protein	GO:0003690;GO:0006355	regulation of transcription, DNA-templated [GO:0006355]	double-stranded DNA binding [GO:0003690]
		TRINITY_DN28010_c0_g1_i4	Uncharacterized protein	GO:0003690;GO:0006355	regulation of transcription, DNA-templated [GO:0006355]	double-stranded DNA binding [GO:0003690]
		TRINITY_DN28010_c0_g1_i10	Uncharacterized protein	GO:0003690;GO:0006355	regulation of transcription, DNA-templated [GO:0006355]	double-stranded DNA binding [GO:0003690]
		TRINITY_DN28010_c0_g1_i6	Uncharacterized protein	GO:0003690;GO:0006355	regulation of transcription, DNA-templated [GO:0006355]	double-stranded DNA binding [GO:0003690]
		TRINITY_DN28010_c0_g1_i7	Uncharacterized protein	GO:0003690;GO:0006355	regulation of transcription, DNA-templated [GO:0006355]	double-stranded DNA binding [GO:0003690]
		TRINITY_DN28010_c0_g1_i8	Uncharacterized protein	GO:0003690;GO:0006355	regulation of transcription, DNA-templated [GO:0006355]	double-stranded DNA binding [GO:0003690]
		TRINITY_DN28010_c0_g1_i9	Uncharacterized protein	GO:0003690;GO:0006355	regulation of transcription, DNA-templated [GO:0006355]	double-stranded DNA binding [GO:0003690]
		TRINITY_DN28010_c0_g1_i3	Uncharacterized protein	GO:0003690;GO:0006355	regulation of transcription, DNA-templated [GO:0006355]	double-stranded DNA binding [GO:0003690]
		TRINITY_DN28010_c0_g2_i2	Uncharacterized protein	GO:0003690;GO:0006355	regulation of transcription, DNA-templated [GO:0006355]	double-stranded DNA binding [GO:0003690]
		TRINITY_DN28010_c0_g2_i1	Uncharacterized protein	GO:0003690;GO:0006355	regulation of transcription, DNA-templated [GO:0006355]	double-stranded DNA binding [GO:0003690]
		TRINITY_DN28034_c0_g1_i2	Uncharacterized protein
		TRINITY_DN28000_c0_g1_i3	Uncharacterized protein	GO:0005634;GO:0003700;GO:0043565		DNA binding transcription factor activity [GO:0003700];sequence-specific DNA binding [GO:0043565]	nucleus [GO:0005634]
		TRINITY_DN28000_c0_g1_i1	Heat stress transcription factor B-1; Heat stress transcription factor 23; OsHsf-23	GO:0005737;GO:0005634;GO:0003700;GO:0043565;GO:0045892;GO:0009408;GO:0006351	negative regulation of transcription, DNA-templated [GO:0045892];response to heat [GO:0009408];transcription, DNA-templated [GO:0006351]	DNA binding transcription factor activity [GO:0003700];sequence-specific DNA binding [GO:0043565]	cytoplasm [GO:0005737];nucleus [GO:0005634]
		TRINITY_DN28000_c0_g1_i4	Uncharacterized protein	GO:0005634;GO:0003700;GO:0043565		DNA binding transcription factor activity [GO:0003700];sequence-specific DNA binding [GO:0043565]	nucleus [GO:0005634]
		TRINITY_DN28000_c0_g1_i2	Uncharacterized protein	GO:0005634;GO:0003700;GO:0043565		DNA binding transcription factor activity [GO:0003700];sequence-specific DNA binding [GO:0043565]	nucleus [GO:0005634]
		TRINITY_DN28000_c0_g2_i1	Uncharacterized protein
		TRINITY_DN28043_c1_g2_i1	Uncharacterized protein	GO:0016021;GO:0016592			integral component of membrane [GO:0016021];mediator complex [GO:0016592]
		TRINITY_DN28092_c0_g1_i2	Uncharacterized protein	GO:0016021			integral component of membrane [GO:0016021]
		TRINITY_DN28092_c0_g1_i1	Uncharacterized protein	GO:0016021			integral component of membrane [GO:0016021]
		TRINITY_DN28092_c0_g2_i1	GT47_2A	GO:0016757;GO:0006486	protein glycosylation [GO:0006486]	transferase activity, transferring glycosyl groups [GO:0016757]
		TRINITY_DN28092_c0_g2_i6	GT47_2A	GO:0016757;GO:0006486	protein glycosylation [GO:0006486]	transferase activity, transferring glycosyl groups [GO:0016757]
		TRINITY_DN28092_c0_g2_i2	GT47_2A	GO:0016757;GO:0006486	protein glycosylation [GO:0006486]	transferase activity, transferring glycosyl groups [GO:0016757]
		TRINITY_DN28092_c0_g2_i5	GT47_2B	GO:0016757;GO:0006486	protein glycosylation [GO:0006486]	transferase activity, transferring glycosyl groups [GO:0016757]
		TRINITY_DN28092_c0_g2_i3	GT47_2B	GO:0016757;GO:0006486	protein glycosylation [GO:0006486]	transferase activity, transferring glycosyl groups [GO:0016757]
		TRINITY_DN28090_c0_g1_i5	Uncharacterized protein	GO:0016021;GO:0005385		zinc ion transmembrane transporter activity [GO:0005385]	integral component of membrane [GO:0016021]
		TRINITY_DN28090_c0_g1_i7	Uncharacterized protein	GO:0016021;GO:0005385		zinc ion transmembrane transporter activity [GO:0005385]	integral component of membrane [GO:0016021]
		TRINITY_DN28090_c0_g1_i4	Uncharacterized protein	GO:0016021;GO:0005385		zinc ion transmembrane transporter activity [GO:0005385]	integral component of membrane [GO:0016021]
		TRINITY_DN28090_c0_g1_i3	Uncharacterized protein	GO:0016021;GO:0005385		zinc ion transmembrane transporter activity [GO:0005385]	integral component of membrane [GO:0016021]
		TRINITY_DN28090_c0_g1_i1	Uncharacterized protein	GO:0016021;GO:0005385		zinc ion transmembrane transporter activity [GO:0005385]	integral component of membrane [GO:0016021]
		TRINITY_DN28090_c0_g1_i11	Uncharacterized protein	GO:0016021;GO:0005385		zinc ion transmembrane transporter activity [GO:0005385]	integral component of membrane [GO:0016021]
		TRINITY_DN28090_c0_g1_i2	Uncharacterized protein	GO:0016021;GO:0005385		zinc ion transmembrane transporter activity [GO:0005385]	integral component of membrane [GO:0016021]
		TRINITY_DN28090_c0_g1_i8	Uncharacterized protein	GO:0016021;GO:0005385		zinc ion transmembrane transporter activity [GO:0005385]	integral component of membrane [GO:0016021]
		TRINITY_DN28090_c0_g2_i1	Uncharacterized protein	GO:0016021;GO:0005385		zinc ion transmembrane transporter activity [GO:0005385]	integral component of membrane [GO:0016021]
		TRINITY_DN28022_c0_g1_i1	Uncharacterized protein	GO:0043531		ADP binding [GO:0043531]
		TRINITY_DN28022_c0_g2_i1	Uncharacterized protein	GO:0043531		ADP binding [GO:0043531]
		TRINITY_DN28022_c1_g1_i4	Uncharacterized protein	GO:0043531		ADP binding [GO:0043531]
		TRINITY_DN28022_c1_g1_i3	Uncharacterized protein	GO:0043531		ADP binding [GO:0043531]
		TRINITY_DN28022_c1_g1_i2	Uncharacterized protein	GO:0043531		ADP binding [GO:0043531]
		TRINITY_DN28022_c1_g1_i1	Uncharacterized protein
		TRINITY_DN28038_c0_g1_i1	Uncharacterized protein
		TRINITY_DN28038_c0_g1_i5	Uncharacterized protein
		TRINITY_DN28038_c0_g1_i7	Uncharacterized protein
		TRINITY_DN28038_c0_g1_i3	Uncharacterized protein
		TRINITY_DN28038_c0_g1_i6	Uncharacterized protein
		TRINITY_DN28038_c0_g1_i2	Uncharacterized protein
		TRINITY_DN28038_c0_g1_i4	Uncharacterized protein
		TRINITY_DN28038_c1_g2_i2	Uncharacterized protein
		TRINITY_DN28038_c1_g2_i4	Uncharacterized protein
		TRINITY_DN28038_c1_g2_i1	Uncharacterized protein
		TRINITY_DN28038_c1_g2_i13	Uncharacterized protein
		TRINITY_DN28038_c1_g2_i9	Uncharacterized protein
		TRINITY_DN28038_c1_g2_i5	Uncharacterized protein
		TRINITY_DN28041_c0_g1_i4	Uncharacterized protein	GO:0003676;GO:0008270;GO:0006355	regulation of transcription, DNA-templated [GO:0006355]	nucleic acid binding [GO:0003676];zinc ion binding [GO:0008270]
		TRINITY_DN28041_c0_g1_i3	Uncharacterized protein	GO:0006355	regulation of transcription, DNA-templated [GO:0006355]
		TRINITY_DN28041_c0_g1_i1	Uncharacterized protein	GO:0006355	regulation of transcription, DNA-templated [GO:0006355]
		TRINITY_DN28041_c0_g1_i2	Uncharacterized protein	GO:0006355	regulation of transcription, DNA-templated [GO:0006355]
		TRINITY_DN28041_c0_g2_i2	Uncharacterized protein	GO:0008270;GO:0006355	regulation of transcription, DNA-templated [GO:0006355]	zinc ion binding [GO:0008270]
		TRINITY_DN28041_c0_g2_i1	Uncharacterized protein	GO:0003676;GO:0008270;GO:0006355	regulation of transcription, DNA-templated [GO:0006355]	nucleic acid binding [GO:0003676];zinc ion binding [GO:0008270]
		TRINITY_DN28072_c0_g1_i4	Uncharacterized protein	GO:0030247		polysaccharide binding [GO:0030247]
		TRINITY_DN28072_c0_g1_i11	Uncharacterized protein	GO:0016021;GO:0005509;GO:0030247		calcium ion binding [GO:0005509];polysaccharide binding [GO:0030247]	integral component of membrane [GO:0016021]
		TRINITY_DN28072_c0_g1_i12	Uncharacterized protein	GO:0030247		polysaccharide binding [GO:0030247]
		TRINITY_DN28072_c0_g1_i10	Uncharacterized protein	GO:0016021;GO:0005509;GO:0030247		calcium ion binding [GO:0005509];polysaccharide binding [GO:0030247]	integral component of membrane [GO:0016021]
		TRINITY_DN28072_c0_g1_i1	Uncharacterized protein	GO:0016021;GO:0005509;GO:0030247		calcium ion binding [GO:0005509];polysaccharide binding [GO:0030247]	integral component of membrane [GO:0016021]
		TRINITY_DN28072_c0_g1_i6	Uncharacterized protein	GO:0030247		polysaccharide binding [GO:0030247]
		TRINITY_DN28072_c0_g1_i3	Uncharacterized protein	GO:0030247		polysaccharide binding [GO:0030247]
		TRINITY_DN28072_c0_g1_i7	Uncharacterized protein	GO:0030247		polysaccharide binding [GO:0030247]
		TRINITY_DN28088_c0_g1_i1	Uncharacterized protein
		TRINITY_DN28088_c0_g1_i3	Photosystem II reaction center Psb28 protein	GO:0009654;GO:0015979	photosynthesis [GO:0015979]		photosystem II oxygen evolving complex [GO:0009654]
		TRINITY_DN28088_c0_g1_i5	Photosystem II reaction center Psb28 protein	GO:0009654;GO:0015979	photosynthesis [GO:0015979]		photosystem II oxygen evolving complex [GO:0009654]
		TRINITY_DN28088_c0_g1_i4	Uncharacterized protein
		TRINITY_DN28088_c0_g1_i2	Uncharacterized protein
		TRINITY_DN28088_c0_g2_i2	Photosystem II reaction center Psb28 protein	GO:0009654;GO:0015979	photosynthesis [GO:0015979]		photosystem II oxygen evolving complex [GO:0009654]
		TRINITY_DN28088_c0_g2_i1	Photosystem II reaction center Psb28 protein	GO:0009654;GO:0015979	photosynthesis [GO:0015979]		photosystem II oxygen evolving complex [GO:0009654]
		TRINITY_DN28068_c0_g1_i4	Uncharacterized protein
		TRINITY_DN28068_c0_g1_i6	Uncharacterized protein
		TRINITY_DN28068_c0_g1_i1	Uncharacterized protein
		TRINITY_DN28068_c0_g1_i8	Uncharacterized protein	GO:0005622;GO:0008565;GO:0031204	posttranslational protein targeting to membrane, translocation [GO:0031204]	protein transporter activity [GO:0008565]	intracellular [GO:0005622]
		TRINITY_DN28068_c0_g1_i9	Uncharacterized protein
		TRINITY_DN28068_c0_g1_i7	Uncharacterized protein
		TRINITY_DN28068_c0_g1_i2	Uncharacterized protein
		TRINITY_DN28068_c0_g1_i11	Uncharacterized protein
		TRINITY_DN28068_c0_g2_i1	Uncharacterized protein
		TRINITY_DN28026_c0_g1_i2	Tubulin beta chain	GO:0005737;GO:0005874;GO:0005525;GO:0003924;GO:0005200;GO:0007017	microtubule-based process [GO:0007017]	GTP binding [GO:0005525];GTPase activity [GO:0003924];structural constituent of cytoskeleton [GO:0005200]	cytoplasm [GO:0005737];microtubule [GO:0005874]
		TRINITY_DN28026_c0_g1_i1	Tubulin beta chain	GO:0005737;GO:0005874;GO:0005525;GO:0003924;GO:0005200;GO:0007017	microtubule-based process [GO:0007017]	GTP binding [GO:0005525];GTPase activity [GO:0003924];structural constituent of cytoskeleton [GO:0005200]	cytoplasm [GO:0005737];microtubule [GO:0005874]
		TRINITY_DN28037_c0_g2_i1	Cold shock protein CS66	GO:0006950;GO:0009415	response to stress [GO:0006950];response to water [GO:0009415]
		TRINITY_DN28037_c0_g3_i1	Dehydrin 5	GO:0006950;GO:0009415	response to stress [GO:0006950];response to water [GO:0009415]
		TRINITY_DN28037_c0_g4_i1	Dehydrin DHN3	GO:0006950;GO:0009415	response to stress [GO:0006950];response to water [GO:0009415]
		TRINITY_DN28037_c0_g5_i1	Dehydrin 5	GO:0006950;GO:0009415	response to stress [GO:0006950];response to water [GO:0009415]
		TRINITY_DN28037_c0_g5_i2	Dehydrin DHN2	GO:0006950;GO:0009415	response to stress [GO:0006950];response to water [GO:0009415]
		TRINITY_DN28037_c0_g6_i1	Dehydrin 5	GO:0006950;GO:0009415	response to stress [GO:0006950];response to water [GO:0009415]
		TRINITY_DN28037_c0_g8_i1	WZY2-1 protein	GO:0006950;GO:0009415	response to stress [GO:0006950];response to water [GO:0009415]
		TRINITY_DN28037_c2_g1_i1	Salt-induced YSK2 dehydrin 2	GO:0006950;GO:0009415	response to stress [GO:0006950];response to water [GO:0009415]
		TRINITY_DN28065_c0_g1_i1	Uncharacterized protein	GO:0003676;GO:0015074	DNA integration [GO:0015074]	nucleic acid binding [GO:0003676]
		TRINITY_DN28065_c0_g2_i1	Uncharacterized protein	GO:0003676;GO:0015074	DNA integration [GO:0015074]	nucleic acid binding [GO:0003676]
		TRINITY_DN28039_c1_g1_i6	Uncharacterized protein	GO:0008308;GO:0044070	regulation of anion transport [GO:0044070]	voltage-gated anion channel activity [GO:0008308]
		TRINITY_DN28016_c0_g1_i1	Uncharacterized protein	GO:0016021;GO:0017176;GO:0006506	GPI anchor biosynthetic process [GO:0006506]	phosphatidylinositol N-acetylglucosaminyltransferase activity [GO:0017176]	integral component of membrane [GO:0016021]
		TRINITY_DN28016_c1_g1_i1	Uncharacterized protein	GO:0016021;GO:0017176;GO:0006506	GPI anchor biosynthetic process [GO:0006506]	phosphatidylinositol N-acetylglucosaminyltransferase activity [GO:0017176]	integral component of membrane [GO:0016021]
		TRINITY_DN28097_c0_g1_i1	Uncharacterized protein	GO:0016021;GO:0022857		transmembrane transporter activity [GO:0022857]	integral component of membrane [GO:0016021]
		TRINITY_DN28031_c0_g1_i2	Uncharacterized protein
		TRINITY_DN28031_c0_g1_i1	B2 protein
		TRINITY_DN28066_c0_g1_i1	Uncharacterized protein	GO:0016021			integral component of membrane [GO:0016021]
		TRINITY_DN28066_c0_g1_i6	Uncharacterized protein	GO:0016021			integral component of membrane [GO:0016021]
		TRINITY_DN28066_c0_g1_i8	Uncharacterized protein	GO:0016021			integral component of membrane [GO:0016021]
		TRINITY_DN28066_c0_g1_i3	Uncharacterized protein	GO:0016021			integral component of membrane [GO:0016021]
		TRINITY_DN28066_c0_g1_i5	Uncharacterized protein	GO:0016021			integral component of membrane [GO:0016021]
		TRINITY_DN28087_c0_g1_i1	Uncharacterized protein
		TRINITY_DN28087_c0_g3_i4	Uncharacterized protein	GO:0016021			integral component of membrane [GO:0016021]
		TRINITY_DN28087_c0_g3_i6	Uncharacterized protein
		TRINITY_DN28087_c0_g3_i2	Uncharacterized protein	GO:0016021			integral component of membrane [GO:0016021]
		TRINITY_DN28087_c0_g3_i1	Uncharacterized protein	GO:0016021			integral component of membrane [GO:0016021]
		TRINITY_DN28087_c0_g3_i5	Uncharacterized protein
		TRINITY_DN28087_c0_g4_i2	Uncharacterized protein
		TRINITY_DN28087_c0_g4_i1	Uncharacterized protein
		TRINITY_DN28087_c3_g1_i4	Uncharacterized protein
		TRINITY_DN28087_c3_g1_i3	Uncharacterized protein
		TRINITY_DN28076_c0_g1_i2	Uncharacterized protein
		TRINITY_DN28076_c0_g1_i1	Uncharacterized protein
		TRINITY_DN28076_c0_g2_i3	Uncharacterized protein
		TRINITY_DN28076_c0_g2_i2	Uncharacterized protein
		TRINITY_DN28076_c0_g2_i6	Uncharacterized protein
		TRINITY_DN28076_c0_g2_i4	Uncharacterized protein
		TRINITY_DN28076_c0_g2_i7	Uncharacterized protein
		TRINITY_DN28076_c0_g2_i5	Uncharacterized protein
		TRINITY_DN28076_c0_g2_i1	Uncharacterized protein
		TRINITY_DN28076_c0_g3_i1	Uncharacterized protein
		TRINITY_DN28053_c0_g1_i5	Uncharacterized protein	GO:0009507;GO:0016021			chloroplast [GO:0009507];integral component of membrane [GO:0016021]
		TRINITY_DN28053_c0_g1_i4	Uncharacterized protein	GO:0016021			integral component of membrane [GO:0016021]
		TRINITY_DN28053_c0_g1_i3	Uncharacterized protein	GO:0016021			integral component of membrane [GO:0016021]
		TRINITY_DN28053_c0_g1_i1	Uncharacterized protein	GO:0016021			integral component of membrane [GO:0016021]
		TRINITY_DN28053_c0_g1_i2	Uncharacterized protein	GO:0016021			integral component of membrane [GO:0016021]
		TRINITY_DN28053_c0_g2_i1	Predicted protein	GO:0016021			integral component of membrane [GO:0016021]
		TRINITY_DN28081_c0_g1_i7	Predicted protein
		TRINITY_DN28081_c0_g1_i5	Predicted protein
		TRINITY_DN28081_c0_g1_i4	Predicted protein
		TRINITY_DN28081_c0_g1_i8	Uncharacterized protein
		TRINITY_DN28081_c0_g1_i9	Predicted protein
		TRINITY_DN28081_c0_g1_i10	Predicted protein
		TRINITY_DN28081_c0_g1_i11	Predicted protein
		TRINITY_DN28061_c0_g1_i6	Uncharacterized protein	GO:0000786;GO:0005634;GO:0003677;GO:0006334;GO:0006355	nucleosome assembly [GO:0006334];regulation of transcription, DNA-templated [GO:0006355]	DNA binding [GO:0003677]	nucleosome [GO:0000786];nucleus [GO:0005634]
		TRINITY_DN28061_c0_g1_i4	HMG-I/Y protein HMGa	GO:0000786;GO:0005634;GO:0003677;GO:0006334;GO:0006355	nucleosome assembly [GO:0006334];regulation of transcription, DNA-templated [GO:0006355]	DNA binding [GO:0003677]	nucleosome [GO:0000786];nucleus [GO:0005634]
		TRINITY_DN28061_c0_g1_i1	Uncharacterized protein	GO:0000786;GO:0005634;GO:0003677;GO:0006334;GO:0006355	nucleosome assembly [GO:0006334];regulation of transcription, DNA-templated [GO:0006355]	DNA binding [GO:0003677]	nucleosome [GO:0000786];nucleus [GO:0005634]
		TRINITY_DN28061_c0_g1_i3	Uncharacterized protein	GO:0000786;GO:0005634;GO:0003677;GO:0006334;GO:0006355	nucleosome assembly [GO:0006334];regulation of transcription, DNA-templated [GO:0006355]	DNA binding [GO:0003677]	nucleosome [GO:0000786];nucleus [GO:0005634]
		TRINITY_DN28061_c0_g1_i2	HMG-I/Y protein HMGa	GO:0000786;GO:0005634;GO:0003677;GO:0006334;GO:0006355	nucleosome assembly [GO:0006334];regulation of transcription, DNA-templated [GO:0006355]	DNA binding [GO:0003677]	nucleosome [GO:0000786];nucleus [GO:0005634]
		TRINITY_DN28061_c0_g2_i1	Uncharacterized protein	GO:0000786;GO:0005634;GO:0003677;GO:0006334;GO:0006355	nucleosome assembly [GO:0006334];regulation of transcription, DNA-templated [GO:0006355]	DNA binding [GO:0003677]	nucleosome [GO:0000786];nucleus [GO:0005634]
		TRINITY_DN28017_c0_g1_i1	Uncharacterized protein	GO:0043531		ADP binding [GO:0043531]
		TRINITY_DN28017_c0_g2_i1	Disease resistance RPP8-like protein 3	GO:0043531		ADP binding [GO:0043531]
		TRINITY_DN28017_c0_g3_i1	Uncharacterized protein	GO:0043531		ADP binding [GO:0043531]
		TRINITY_DN28008_c0_g1_i1	Transcription factor GTE11
		TRINITY_DN28008_c1_g1_i1	Uncharacterized protein
		TRINITY_DN28008_c1_g2_i1	Uncharacterized protein
		TRINITY_DN28008_c1_g2_i2	Uncharacterized protein
		TRINITY_DN28008_c1_g3_i1	Uncharacterized protein
		TRINITY_DN28008_c3_g1_i1	Predicted protein
		TRINITY_DN28074_c0_g1_i3	Very-long-chain (3R)-3-hydroxyacyl-CoA dehydratase	GO:0005789;GO:0016021;GO:0102343;GO:0102344;GO:0102345;GO:0102158;GO:0006633	fatty acid biosynthetic process [GO:0006633]	3-hydroxy-arachidoyl-CoA dehydratase activity [GO:0102343];3-hydroxy-behenoyl-CoA dehydratase activity [GO:0102344];3-hydroxy-lignoceroyl-CoA dehydratase activity [GO:0102345];very-long-chain 3-hydroxyacyl-CoA dehydratase activity [GO:0102158]	endoplasmic reticulum membrane [GO:0005789];integral component of membrane [GO:0016021]
		TRINITY_DN28074_c0_g1_i1	Very-long-chain (3R)-3-hydroxyacyl-CoA dehydratase	GO:0005789;GO:0016021;GO:0102343;GO:0102344;GO:0102345;GO:0102158;GO:0006633	fatty acid biosynthetic process [GO:0006633]	3-hydroxy-arachidoyl-CoA dehydratase activity [GO:0102343];3-hydroxy-behenoyl-CoA dehydratase activity [GO:0102344];3-hydroxy-lignoceroyl-CoA dehydratase activity [GO:0102345];very-long-chain 3-hydroxyacyl-CoA dehydratase activity [GO:0102158]	endoplasmic reticulum membrane [GO:0005789];integral component of membrane [GO:0016021]
		TRINITY_DN28074_c0_g1_i10	Very-long-chain (3R)-3-hydroxyacyl-CoA dehydratase	GO:0005789;GO:0016021;GO:0102343;GO:0102344;GO:0102345;GO:0102158;GO:0006633	fatty acid biosynthetic process [GO:0006633]	3-hydroxy-arachidoyl-CoA dehydratase activity [GO:0102343];3-hydroxy-behenoyl-CoA dehydratase activity [GO:0102344];3-hydroxy-lignoceroyl-CoA dehydratase activity [GO:0102345];very-long-chain 3-hydroxyacyl-CoA dehydratase activity [GO:0102158]	endoplasmic reticulum membrane [GO:0005789];integral component of membrane [GO:0016021]
		TRINITY_DN28074_c0_g1_i15	Very-long-chain (3R)-3-hydroxyacyl-CoA dehydratase	GO:0005789;GO:0016021;GO:0102343;GO:0102344;GO:0102345;GO:0102158;GO:0006633	fatty acid biosynthetic process [GO:0006633]	3-hydroxy-arachidoyl-CoA dehydratase activity [GO:0102343];3-hydroxy-behenoyl-CoA dehydratase activity [GO:0102344];3-hydroxy-lignoceroyl-CoA dehydratase activity [GO:0102345];very-long-chain 3-hydroxyacyl-CoA dehydratase activity [GO:0102158]	endoplasmic reticulum membrane [GO:0005789];integral component of membrane [GO:0016021]
		TRINITY_DN28074_c0_g1_i21	Very-long-chain (3R)-3-hydroxyacyl-CoA dehydratase	GO:0005789;GO:0016021;GO:0102343;GO:0102344;GO:0102345;GO:0102158;GO:0006633	fatty acid biosynthetic process [GO:0006633]	3-hydroxy-arachidoyl-CoA dehydratase activity [GO:0102343];3-hydroxy-behenoyl-CoA dehydratase activity [GO:0102344];3-hydroxy-lignoceroyl-CoA dehydratase activity [GO:0102345];very-long-chain 3-hydroxyacyl-CoA dehydratase activity [GO:0102158]	endoplasmic reticulum membrane [GO:0005789];integral component of membrane [GO:0016021]
		TRINITY_DN28074_c0_g1_i20	Very-long-chain (3R)-3-hydroxyacyl-CoA dehydratase	GO:0005789;GO:0016021;GO:0102343;GO:0102344;GO:0102345;GO:0102158;GO:0006633	fatty acid biosynthetic process [GO:0006633]	3-hydroxy-arachidoyl-CoA dehydratase activity [GO:0102343];3-hydroxy-behenoyl-CoA dehydratase activity [GO:0102344];3-hydroxy-lignoceroyl-CoA dehydratase activity [GO:0102345];very-long-chain 3-hydroxyacyl-CoA dehydratase activity [GO:0102158]	endoplasmic reticulum membrane [GO:0005789];integral component of membrane [GO:0016021]
		TRINITY_DN28074_c0_g1_i19	Very-long-chain (3R)-3-hydroxyacyl-CoA dehydratase	GO:0005789;GO:0016021;GO:0102343;GO:0102344;GO:0102345;GO:0102158;GO:0006633	fatty acid biosynthetic process [GO:0006633]	3-hydroxy-arachidoyl-CoA dehydratase activity [GO:0102343];3-hydroxy-behenoyl-CoA dehydratase activity [GO:0102344];3-hydroxy-lignoceroyl-CoA dehydratase activity [GO:0102345];very-long-chain 3-hydroxyacyl-CoA dehydratase activity [GO:0102158]	endoplasmic reticulum membrane [GO:0005789];integral component of membrane [GO:0016021]
		TRINITY_DN28074_c0_g1_i17	Very-long-chain (3R)-3-hydroxyacyl-CoA dehydratase	GO:0005789;GO:0016021;GO:0102343;GO:0102344;GO:0102345;GO:0102158;GO:0006633	fatty acid biosynthetic process [GO:0006633]	3-hydroxy-arachidoyl-CoA dehydratase activity [GO:0102343];3-hydroxy-behenoyl-CoA dehydratase activity [GO:0102344];3-hydroxy-lignoceroyl-CoA dehydratase activity [GO:0102345];very-long-chain 3-hydroxyacyl-CoA dehydratase activity [GO:0102158]	endoplasmic reticulum membrane [GO:0005789];integral component of membrane [GO:0016021]
		TRINITY_DN28074_c0_g1_i6	Very-long-chain (3R)-3-hydroxyacyl-CoA dehydratase	GO:0005789;GO:0016021;GO:0102343;GO:0102344;GO:0102345;GO:0102158;GO:0006633	fatty acid biosynthetic process [GO:0006633]	3-hydroxy-arachidoyl-CoA dehydratase activity [GO:0102343];3-hydroxy-behenoyl-CoA dehydratase activity [GO:0102344];3-hydroxy-lignoceroyl-CoA dehydratase activity [GO:0102345];very-long-chain 3-hydroxyacyl-CoA dehydratase activity [GO:0102158]	endoplasmic reticulum membrane [GO:0005789];integral component of membrane [GO:0016021]
		TRINITY_DN28074_c0_g1_i4	Very-long-chain (3R)-3-hydroxyacyl-CoA dehydratase	GO:0005789;GO:0016021;GO:0102343;GO:0102344;GO:0102345;GO:0102158;GO:0006633	fatty acid biosynthetic process [GO:0006633]	3-hydroxy-arachidoyl-CoA dehydratase activity [GO:0102343];3-hydroxy-behenoyl-CoA dehydratase activity [GO:0102344];3-hydroxy-lignoceroyl-CoA dehydratase activity [GO:0102345];very-long-chain 3-hydroxyacyl-CoA dehydratase activity [GO:0102158]	endoplasmic reticulum membrane [GO:0005789];integral component of membrane [GO:0016021]
		TRINITY_DN28074_c0_g1_i22	Very-long-chain (3R)-3-hydroxyacyl-CoA dehydratase	GO:0005789;GO:0016021;GO:0102343;GO:0102344;GO:0102345;GO:0102158;GO:0006633	fatty acid biosynthetic process [GO:0006633]	3-hydroxy-arachidoyl-CoA dehydratase activity [GO:0102343];3-hydroxy-behenoyl-CoA dehydratase activity [GO:0102344];3-hydroxy-lignoceroyl-CoA dehydratase activity [GO:0102345];very-long-chain 3-hydroxyacyl-CoA dehydratase activity [GO:0102158]	endoplasmic reticulum membrane [GO:0005789];integral component of membrane [GO:0016021]
		TRINITY_DN28074_c0_g1_i23	Very-long-chain (3R)-3-hydroxyacyl-CoA dehydratase	GO:0005789;GO:0016021;GO:0102343;GO:0102344;GO:0102345;GO:0102158;GO:0006633	fatty acid biosynthetic process [GO:0006633]	3-hydroxy-arachidoyl-CoA dehydratase activity [GO:0102343];3-hydroxy-behenoyl-CoA dehydratase activity [GO:0102344];3-hydroxy-lignoceroyl-CoA dehydratase activity [GO:0102345];very-long-chain 3-hydroxyacyl-CoA dehydratase activity [GO:0102158]	endoplasmic reticulum membrane [GO:0005789];integral component of membrane [GO:0016021]
		TRINITY_DN28074_c0_g1_i16	Very-long-chain (3R)-3-hydroxyacyl-CoA dehydratase	GO:0005789;GO:0016021;GO:0102343;GO:0102344;GO:0102345;GO:0102158;GO:0006633	fatty acid biosynthetic process [GO:0006633]	3-hydroxy-arachidoyl-CoA dehydratase activity [GO:0102343];3-hydroxy-behenoyl-CoA dehydratase activity [GO:0102344];3-hydroxy-lignoceroyl-CoA dehydratase activity [GO:0102345];very-long-chain 3-hydroxyacyl-CoA dehydratase activity [GO:0102158]	endoplasmic reticulum membrane [GO:0005789];integral component of membrane [GO:0016021]
		TRINITY_DN28074_c0_g1_i8	Very-long-chain (3R)-3-hydroxyacyl-CoA dehydratase	GO:0005789;GO:0016021;GO:0102343;GO:0102344;GO:0102345;GO:0102158;GO:0006633	fatty acid biosynthetic process [GO:0006633]	3-hydroxy-arachidoyl-CoA dehydratase activity [GO:0102343];3-hydroxy-behenoyl-CoA dehydratase activity [GO:0102344];3-hydroxy-lignoceroyl-CoA dehydratase activity [GO:0102345];very-long-chain 3-hydroxyacyl-CoA dehydratase activity [GO:0102158]	endoplasmic reticulum membrane [GO:0005789];integral component of membrane [GO:0016021]
		TRINITY_DN28074_c0_g1_i14	Very-long-chain (3R)-3-hydroxyacyl-CoA dehydratase	GO:0005789;GO:0016021;GO:0102343;GO:0102344;GO:0102345;GO:0102158;GO:0006633	fatty acid biosynthetic process [GO:0006633]	3-hydroxy-arachidoyl-CoA dehydratase activity [GO:0102343];3-hydroxy-behenoyl-CoA dehydratase activity [GO:0102344];3-hydroxy-lignoceroyl-CoA dehydratase activity [GO:0102345];very-long-chain 3-hydroxyacyl-CoA dehydratase activity [GO:0102158]	endoplasmic reticulum membrane [GO:0005789];integral component of membrane [GO:0016021]
		TRINITY_DN28074_c0_g1_i11	Very-long-chain (3R)-3-hydroxyacyl-CoA dehydratase	GO:0005789;GO:0016021;GO:0102343;GO:0102344;GO:0102345;GO:0102158;GO:0006633	fatty acid biosynthetic process [GO:0006633]	3-hydroxy-arachidoyl-CoA dehydratase activity [GO:0102343];3-hydroxy-behenoyl-CoA dehydratase activity [GO:0102344];3-hydroxy-lignoceroyl-CoA dehydratase activity [GO:0102345];very-long-chain 3-hydroxyacyl-CoA dehydratase activity [GO:0102158]	endoplasmic reticulum membrane [GO:0005789];integral component of membrane [GO:0016021]
		TRINITY_DN28080_c0_g1_i1	Uncharacterized protein
		TRINITY_DN28080_c0_g3_i1	Ubiquitinyl hydrolase 1	GO:0036459;GO:0008270;GO:0016579;GO:0006511	protein deubiquitination [GO:0016579];ubiquitin-dependent protein catabolic process [GO:0006511]	thiol-dependent ubiquitinyl hydrolase activity [GO:0036459];zinc ion binding [GO:0008270]
		TRINITY_DN28077_c0_g1_i5	Uncharacterized protein	GO:0016021;GO:0005524;GO:0005509;GO:0030247;GO:0004672		ATP binding [GO:0005524];calcium ion binding [GO:0005509];polysaccharide binding [GO:0030247];protein kinase activity [GO:0004672]	integral component of membrane [GO:0016021]
		TRINITY_DN28077_c0_g1_i1	Uncharacterized protein	GO:0016021;GO:0005524;GO:0005509;GO:0030247;GO:0004672		ATP binding [GO:0005524];calcium ion binding [GO:0005509];polysaccharide binding [GO:0030247];protein kinase activity [GO:0004672]	integral component of membrane [GO:0016021]
		TRINITY_DN28077_c0_g1_i3	Uncharacterized protein	GO:0016021;GO:0005524;GO:0005509;GO:0030247;GO:0004672		ATP binding [GO:0005524];calcium ion binding [GO:0005509];polysaccharide binding [GO:0030247];protein kinase activity [GO:0004672]	integral component of membrane [GO:0016021]
		TRINITY_DN28077_c0_g1_i2	Uncharacterized protein	GO:0016021;GO:0005524;GO:0005509;GO:0030247;GO:0004672		ATP binding [GO:0005524];calcium ion binding [GO:0005509];polysaccharide binding [GO:0030247];protein kinase activity [GO:0004672]	integral component of membrane [GO:0016021]
		TRINITY_DN28077_c0_g1_i4	Uncharacterized protein	GO:0016021;GO:0005524;GO:0005509;GO:0030247;GO:0004672		ATP binding [GO:0005524];calcium ion binding [GO:0005509];polysaccharide binding [GO:0030247];protein kinase activity [GO:0004672]	integral component of membrane [GO:0016021]
		TRINITY_DN28077_c0_g3_i3	Uncharacterized protein	GO:0016021;GO:0005524;GO:0005509;GO:0030247;GO:0004672		ATP binding [GO:0005524];calcium ion binding [GO:0005509];polysaccharide binding [GO:0030247];protein kinase activity [GO:0004672]	integral component of membrane [GO:0016021]
		TRINITY_DN28077_c0_g3_i1	Wall-associated receptor kinase 5	GO:0016021;GO:0005524;GO:0005509;GO:0030247;GO:0004672		ATP binding [GO:0005524];calcium ion binding [GO:0005509];polysaccharide binding [GO:0030247];protein kinase activity [GO:0004672]	integral component of membrane [GO:0016021]
		TRINITY_DN28077_c0_g3_i2	Wall-associated receptor kinase 5	GO:0016021;GO:0005524;GO:0005509;GO:0030247;GO:0004672		ATP binding [GO:0005524];calcium ion binding [GO:0005509];polysaccharide binding [GO:0030247];protein kinase activity [GO:0004672]	integral component of membrane [GO:0016021]
		TRINITY_DN28077_c0_g4_i1	Uncharacterized protein	GO:0016021;GO:0005509;GO:0030247		calcium ion binding [GO:0005509];polysaccharide binding [GO:0030247]	integral component of membrane [GO:0016021]
		TRINITY_DN28077_c1_g1_i1	Uncharacterized protein	GO:0016021;GO:0005524;GO:0005509;GO:0030247;GO:0004672		ATP binding [GO:0005524];calcium ion binding [GO:0005509];polysaccharide binding [GO:0030247];protein kinase activity [GO:0004672]	integral component of membrane [GO:0016021]
		TRINITY_DN28077_c1_g2_i2	Uncharacterized protein	GO:0016021;GO:0005524;GO:0005509;GO:0030247;GO:0004672		ATP binding [GO:0005524];calcium ion binding [GO:0005509];polysaccharide binding [GO:0030247];protein kinase activity [GO:0004672]	integral component of membrane [GO:0016021]
		TRINITY_DN28077_c1_g2_i1	Uncharacterized protein	GO:0016021;GO:0005524;GO:0005509;GO:0030247;GO:0004672		ATP binding [GO:0005524];calcium ion binding [GO:0005509];polysaccharide binding [GO:0030247];protein kinase activity [GO:0004672]	integral component of membrane [GO:0016021]
		TRINITY_DN28013_c0_g1_i1	Putative LRR receptor-like serine/threonine-protein kinase	GO:0005737;GO:0016021;GO:0005524;GO:0008168;GO:0004674;GO:0006364	rRNA processing [GO:0006364]	ATP binding [GO:0005524];methyltransferase activity [GO:0008168];protein serine/threonine kinase activity [GO:0004674]	cytoplasm [GO:0005737];integral component of membrane [GO:0016021]
		TRINITY_DN28047_c0_g1_i4	Uncharacterized protein	GO:0016787;GO:0008152	metabolic process [GO:0008152]	hydrolase activity [GO:0016787]
		TRINITY_DN28047_c0_g1_i3	IAA-amino acid hydrolase ILR1-like protein 5	GO:0016787;GO:0008152	metabolic process [GO:0008152]	hydrolase activity [GO:0016787]
		TRINITY_DN28047_c0_g1_i8	Uncharacterized protein	GO:0016787;GO:0008152	metabolic process [GO:0008152]	hydrolase activity [GO:0016787]
		TRINITY_DN28047_c0_g1_i6	Uncharacterized protein	GO:0016787;GO:0008152	metabolic process [GO:0008152]	hydrolase activity [GO:0016787]
		TRINITY_DN28047_c0_g1_i1	IAA-amino acid hydrolase ILR1-like protein 5	GO:0016787;GO:0008152	metabolic process [GO:0008152]	hydrolase activity [GO:0016787]
		TRINITY_DN28047_c0_g1_i9	Uncharacterized protein	GO:0016787;GO:0008152	metabolic process [GO:0008152]	hydrolase activity [GO:0016787]
		TRINITY_DN28047_c0_g1_i7	Uncharacterized protein	GO:0016787;GO:0008152	metabolic process [GO:0008152]	hydrolase activity [GO:0016787]
		TRINITY_DN28047_c0_g1_i5	Uncharacterized protein	GO:0016787;GO:0008152	metabolic process [GO:0008152]	hydrolase activity [GO:0016787]
		TRINITY_DN28047_c0_g1_i2	Uncharacterized protein	GO:0016787;GO:0008152	metabolic process [GO:0008152]	hydrolase activity [GO:0016787]
		TRINITY_DN28005_c0_g1_i2	Uncharacterized protein
		TRINITY_DN28005_c0_g1_i1	Uncharacterized protein
		TRINITY_DN28005_c0_g2_i1	Uncharacterized protein
		TRINITY_DN28063_c0_g1_i2	Uncharacterized protein	GO:0005623;GO:0009055;GO:0015035;GO:0045454	cell redox homeostasis [GO:0045454]	electron transfer activity [GO:0009055];protein disulfide oxidoreductase activity [GO:0015035]	cell [GO:0005623]
		TRINITY_DN28063_c0_g1_i1	Uncharacterized protein	GO:0005623;GO:0009055;GO:0015035;GO:0045454	cell redox homeostasis [GO:0045454]	electron transfer activity [GO:0009055];protein disulfide oxidoreductase activity [GO:0015035]	cell [GO:0005623]
		TRINITY_DN28063_c0_g1_i3	Uncharacterized protein	GO:0005623;GO:0009055;GO:0015035;GO:0045454	cell redox homeostasis [GO:0045454]	electron transfer activity [GO:0009055];protein disulfide oxidoreductase activity [GO:0015035]	cell [GO:0005623]
		TRINITY_DN28001_c0_g1_i2	Uncharacterized protein
		TRINITY_DN28001_c0_g1_i5	Uncharacterized protein
		TRINITY_DN28001_c0_g1_i3	Uncharacterized protein
		TRINITY_DN28001_c0_g1_i1	Uncharacterized protein
		TRINITY_DN28003_c0_g1_i2	Uncharacterized protein	GO:0003676		nucleic acid binding [GO:0003676]
		TRINITY_DN28003_c0_g1_i1	Uncharacterized protein
		TRINITY_DN28003_c0_g2_i1	Uncharacterized protein
		TRINITY_DN28003_c1_g1_i1	Uncharacterized protein	GO:0003676		nucleic acid binding [GO:0003676]
		TRINITY_DN28003_c1_g2_i1	Uncharacterized protein	GO:0003676		nucleic acid binding [GO:0003676]
		TRINITY_DN28003_c2_g1_i1	Uncharacterized protein	GO:0003676		nucleic acid binding [GO:0003676]
		TRINITY_DN28003_c2_g2_i1	Uncharacterized protein	GO:0003676		nucleic acid binding [GO:0003676]
		TRINITY_DN28003_c3_g1_i1	Uncharacterized protein	GO:0003676		nucleic acid binding [GO:0003676]
		TRINITY_DN28079_c0_g1_i4	Uncharacterized protein
		TRINITY_DN28079_c0_g1_i2	Uncharacterized protein
		TRINITY_DN28079_c0_g1_i3	Uncharacterized protein
		TRINITY_DN28079_c0_g1_i1	Uncharacterized protein
		TRINITY_DN28079_c0_g2_i4	Uncharacterized protein
		TRINITY_DN28079_c0_g2_i1	Uncharacterized protein
		TRINITY_DN28079_c0_g2_i2	Uncharacterized protein
		TRINITY_DN28079_c0_g2_i5	Uncharacterized protein
		TRINITY_DN28079_c0_g2_i10	Uncharacterized protein
		TRINITY_DN28079_c0_g2_i11	Uncharacterized protein
		TRINITY_DN28079_c0_g2_i6	Uncharacterized protein
		TRINITY_DN28079_c0_g2_i8	Uncharacterized protein
		TRINITY_DN28079_c0_g2_i3	Uncharacterized protein
		TRINITY_DN28079_c0_g2_i7	Uncharacterized protein
		TRINITY_DN28079_c0_g2_i9	Uncharacterized protein
		TRINITY_DN28029_c0_g1_i1	Uncharacterized protein	GO:0008033	tRNA processing [GO:0008033]
		TRINITY_DN28044_c1_g1_i2	Uncharacterized protein	GO:0016757		transferase activity, transferring glycosyl groups [GO:0016757]
		TRINITY_DN28044_c1_g1_i1	Uncharacterized protein	GO:0016757		transferase activity, transferring glycosyl groups [GO:0016757]
		TRINITY_DN28044_c1_g2_i1	Uncharacterized protein	GO:0016757		transferase activity, transferring glycosyl groups [GO:0016757]
		TRINITY_DN28044_c3_g1_i1	Uncharacterized protein	GO:0016757		transferase activity, transferring glycosyl groups [GO:0016757]
		TRINITY_DN28044_c4_g1_i1	Uncharacterized protein	GO:0016757		transferase activity, transferring glycosyl groups [GO:0016757]
		TRINITY_DN28075_c0_g1_i4	Histone-lysine N-methyltransferase	GO:0005634;GO:0018024;GO:0046872		histone-lysine N-methyltransferase activity [GO:0018024];metal ion binding [GO:0046872]	nucleus [GO:0005634]
		TRINITY_DN28075_c0_g1_i3	Histone-lysine N-methyltransferase	GO:0005634;GO:0018024;GO:0046872		histone-lysine N-methyltransferase activity [GO:0018024];metal ion binding [GO:0046872]	nucleus [GO:0005634]
		TRINITY_DN28075_c0_g1_i2	Histone-lysine N-methyltransferase	GO:0005634;GO:0018024;GO:0046872		histone-lysine N-methyltransferase activity [GO:0018024];metal ion binding [GO:0046872]	nucleus [GO:0005634]
		TRINITY_DN28075_c0_g1_i1	Histone-lysine N-methyltransferase ATX2	GO:0008168		methyltransferase activity [GO:0008168]
		TRINITY_DN28075_c0_g1_i5	Histone-lysine N-methyltransferase ATX2	GO:0008168		methyltransferase activity [GO:0008168]
		TRINITY_DN28064_c0_g1_i1	Uncharacterized protein	GO:0005829;GO:0009506;GO:0005524;GO:0004386		ATP binding [GO:0005524];helicase activity [GO:0004386]	cytosol [GO:0005829];plasmodesma [GO:0009506]
		TRINITY_DN28083_c0_g1_i1	Uncharacterized protein	GO:0016747;GO:0009058	biosynthetic process [GO:0009058]	transferase activity, transferring acyl groups other than amino-acyl groups [GO:0016747]
		TRINITY_DN28083_c0_g1_i2	Uncharacterized protein	GO:0016747;GO:0009058	biosynthetic process [GO:0009058]	transferase activity, transferring acyl groups other than amino-acyl groups [GO:0016747]
		TRINITY_DN28083_c0_g2_i1	Uncharacterized protein	GO:0016747;GO:0009058	biosynthetic process [GO:0009058]	transferase activity, transferring acyl groups other than amino-acyl groups [GO:0016747]
		TRINITY_DN28094_c0_g1_i1	Uncharacterized protein
		TRINITY_DN28094_c0_g1_i2	Uncharacterized protein
		TRINITY_DN28035_c0_g1_i4	Uncharacterized protein
		TRINITY_DN28035_c0_g1_i1	Uncharacterized protein
		TRINITY_DN28035_c0_g1_i5	Uncharacterized protein
		TRINITY_DN28035_c0_g1_i6	Uncharacterized protein
		TRINITY_DN28035_c0_g1_i2	Uncharacterized protein
		TRINITY_DN28082_c0_g1_i9	Uncharacterized protein	GO:0016021;GO:0005524;GO:0004672		ATP binding [GO:0005524];protein kinase activity [GO:0004672]	integral component of membrane [GO:0016021]
		TRINITY_DN28082_c0_g1_i4	Uncharacterized protein	GO:0016021;GO:0005524;GO:0004672		ATP binding [GO:0005524];protein kinase activity [GO:0004672]	integral component of membrane [GO:0016021]
		TRINITY_DN28082_c0_g1_i5	Uncharacterized protein	GO:0016021;GO:0005524;GO:0004672		ATP binding [GO:0005524];protein kinase activity [GO:0004672]	integral component of membrane [GO:0016021]
		TRINITY_DN28082_c0_g1_i2	Uncharacterized protein	GO:0016021;GO:0005524;GO:0004672		ATP binding [GO:0005524];protein kinase activity [GO:0004672]	integral component of membrane [GO:0016021]
		TRINITY_DN28082_c0_g1_i8	Uncharacterized protein	GO:0016021;GO:0005524;GO:0004672		ATP binding [GO:0005524];protein kinase activity [GO:0004672]	integral component of membrane [GO:0016021]
		TRINITY_DN28082_c0_g1_i7	Uncharacterized protein	GO:0016021;GO:0005524;GO:0004672		ATP binding [GO:0005524];protein kinase activity [GO:0004672]	integral component of membrane [GO:0016021]
		TRINITY_DN28082_c0_g1_i6	Uncharacterized protein	GO:0016021;GO:0005524;GO:0004672		ATP binding [GO:0005524];protein kinase activity [GO:0004672]	integral component of membrane [GO:0016021]
		TRINITY_DN28082_c0_g1_i1	Uncharacterized protein	GO:0016021;GO:0005524;GO:0004672		ATP binding [GO:0005524];protein kinase activity [GO:0004672]	integral component of membrane [GO:0016021]
		TRINITY_DN28082_c0_g1_i3	Uncharacterized protein	GO:0016021;GO:0005524;GO:0004672		ATP binding [GO:0005524];protein kinase activity [GO:0004672]	integral component of membrane [GO:0016021]
		TRINITY_DN28082_c0_g3_i1	Electron transfer flavoprotein-ubiquinone oxidoreductase, mitochondrial; ETF-QO; ETF-ubiquinone oxidoreductase	GO:0031305;GO:0017133;GO:0005739;GO:0051539;GO:0009055;GO:0004174;GO:0046872;GO:0043783;GO:0048039;GO:0006552;GO:0022904;GO:0009646	leucine catabolic process [GO:0006552];respiratory electron transport chain [GO:0022904];response to absence of light [GO:0009646]	4 iron, 4 sulfur cluster binding [GO:0051539];electron transfer activity [GO:0009055];electron-transferring-flavoprotein dehydrogenase activity [GO:0004174];metal ion binding [GO:0046872];oxidoreductase activity, oxidizing metal ions with flavin as acceptor [GO:0043783];ubiquinone binding [GO:0048039]	integral component of mitochondrial inner membrane [GO:0031305];mitochondrial electron transfer flavoprotein complex [GO:0017133];mitochondrion [GO:0005739]
		TRINITY_DN28082_c0_g3_i2	PHD finger protein 3	GO:0006351	transcription, DNA-templated [GO:0006351]
		TRINITY_DN28049_c0_g1_i2	Putative disease resistance protein RGA3	GO:0043531		ADP binding [GO:0043531]
		TRINITY_DN28049_c0_g1_i3	Putative disease resistance protein RGA3	GO:0043531		ADP binding [GO:0043531]
		TRINITY_DN28049_c0_g1_i1	Putative disease resistance protein RGA3	GO:0043531		ADP binding [GO:0043531]
		TRINITY_DN28027_c0_g1_i1	Putative aminotransferase y4uB	GO:0030170;GO:0008483		pyridoxal phosphate binding [GO:0030170];transaminase activity [GO:0008483]
		TRINITY_DN28027_c1_g1_i1	Aminotransferase	GO:0030170;GO:0008483		pyridoxal phosphate binding [GO:0030170];transaminase activity [GO:0008483]
		TRINITY_DN28071_c0_g1_i3	Carboxypeptidase	GO:0004185		serine-type carboxypeptidase activity [GO:0004185]
		TRINITY_DN28071_c0_g1_i2	Carboxypeptidase	GO:0004185		serine-type carboxypeptidase activity [GO:0004185]
		TRINITY_DN28071_c0_g1_i4	Carboxypeptidase	GO:0004185		serine-type carboxypeptidase activity [GO:0004185]
		TRINITY_DN28071_c0_g1_i7	Carboxypeptidase	GO:0004185		serine-type carboxypeptidase activity [GO:0004185]
		TRINITY_DN28071_c0_g1_i6	Carboxypeptidase	GO:0004185		serine-type carboxypeptidase activity [GO:0004185]
		TRINITY_DN28071_c0_g1_i1	Carboxypeptidase	GO:0004185		serine-type carboxypeptidase activity [GO:0004185]
		TRINITY_DN28071_c0_g1_i8	Carboxypeptidase	GO:0004185		serine-type carboxypeptidase activity [GO:0004185]
		TRINITY_DN28071_c0_g2_i1	Carboxypeptidase	GO:0004185		serine-type carboxypeptidase activity [GO:0004185]
		TRINITY_DN28054_c0_g1_i1	Uncharacterized protein
		TRINITY_DN28054_c0_g1_i2	Uncharacterized protein
		TRINITY_DN28036_c0_g1_i7	Uncharacterized protein
		TRINITY_DN28036_c0_g1_i4	Uncharacterized protein
		TRINITY_DN28036_c0_g1_i5	Uncharacterized protein
		TRINITY_DN28036_c0_g1_i3	Uncharacterized protein
		TRINITY_DN28036_c0_g1_i8	Uncharacterized protein
		TRINITY_DN28036_c0_g1_i1	Uncharacterized protein
		TRINITY_DN28036_c0_g1_i6	Uncharacterized protein
		TRINITY_DN28036_c0_g1_i2	Uncharacterized protein
		TRINITY_DN28036_c0_g2_i1	Uncharacterized protein
		TRINITY_DN28036_c0_g3_i1	Uncharacterized protein
		TRINITY_DN28020_c0_g1_i1	Uncharacterized protein	GO:0016788		hydrolase activity, acting on ester bonds [GO:0016788]
		TRINITY_DN28020_c0_g1_i2	Uncharacterized protein	GO:0016788		hydrolase activity, acting on ester bonds [GO:0016788]
		TRINITY_DN28020_c0_g1_i3	Uncharacterized protein	GO:0016788		hydrolase activity, acting on ester bonds [GO:0016788]
		TRINITY_DN28020_c0_g2_i1	Uncharacterized protein	GO:0016788		hydrolase activity, acting on ester bonds [GO:0016788]
		TRINITY_DN28021_c0_g1_i1	Uncharacterized protein
		TRINITY_DN28021_c0_g2_i1	Uncharacterized protein
		TRINITY_DN28004_c0_g1_i2	30 kDa heat shock protein
		TRINITY_DN28004_c0_g1_i1	30 kDa heat shock protein
		TRINITY_DN28050_c0_g1_i4	Uncharacterized protein
		TRINITY_DN28050_c0_g1_i1	Uncharacterized protein
		TRINITY_DN28050_c0_g1_i6	Uncharacterized protein
		TRINITY_DN28050_c0_g1_i3	Uncharacterized protein
		TRINITY_DN28050_c0_g1_i5	Uncharacterized protein
		TRINITY_DN28050_c0_g3_i2	Autophagy-related protein	GO:0005840;GO:0003735;GO:0006914;GO:0006412	autophagy [GO:0006914];translation [GO:0006412]	structural constituent of ribosome [GO:0003735]	ribosome [GO:0005840]
		TRINITY_DN28050_c0_g3_i1	Autophagy-related protein	GO:0005840;GO:0003735;GO:0006914;GO:0006412	autophagy [GO:0006914];translation [GO:0006412]	structural constituent of ribosome [GO:0003735]	ribosome [GO:0005840]
		TRINITY_DN28050_c0_g4_i1	Uncharacterized protein	GO:0003697;GO:0006952;GO:0006355	defense response [GO:0006952];regulation of transcription, DNA-templated [GO:0006355]	single-stranded DNA binding [GO:0003697]
		TRINITY_DN28050_c0_g5_i1	Uncharacterized protein	GO:0019538	protein metabolic process [GO:0019538]
		TRINITY_DN28050_c0_g5_i2	Uncharacterized protein	GO:0019538	protein metabolic process [GO:0019538]
		TRINITY_DN28070_c0_g1_i9	Uncharacterized protein
		TRINITY_DN28070_c0_g1_i7	Uncharacterized protein
		TRINITY_DN28070_c0_g1_i1	Uncharacterized protein
		TRINITY_DN28070_c0_g1_i11	Uncharacterized protein	GO:0005737;GO:0004427;GO:0000287;GO:0006796	phosphate-containing compound metabolic process [GO:0006796]	inorganic diphosphatase activity [GO:0004427];magnesium ion binding [GO:0000287]	cytoplasm [GO:0005737]
		TRINITY_DN28070_c0_g1_i6	Uncharacterized protein
		TRINITY_DN28070_c0_g1_i3	Uncharacterized protein
		TRINITY_DN28098_c1_g1_i1	Uncharacterized protein	GO:0009507;GO:0016020;GO:0030246;GO:0003824;GO:0005975;GO:0009773;GO:0010628	carbohydrate metabolic process [GO:0005975];photosynthetic electron transport in photosystem I [GO:0009773];positive regulation of gene expression [GO:0010628]	carbohydrate binding [GO:0030246];catalytic activity [GO:0003824]	chloroplast [GO:0009507];membrane [GO:0016020]
		TRINITY_DN28055_c0_g1_i4	Uncharacterized protein
		TRINITY_DN28055_c0_g1_i2	Predicted protein
		TRINITY_DN28055_c0_g1_i3	Uncharacterized protein
		TRINITY_DN28055_c0_g1_i1	Uncharacterized protein
		TRINITY_DN28069_c0_g1_i7	Uncharacterized protein
		TRINITY_DN28069_c0_g1_i8	Predicted protein
		TRINITY_DN28069_c0_g1_i2	Uncharacterized protein
		TRINITY_DN28069_c0_g1_i1	Uncharacterized protein
		TRINITY_DN28086_c0_g1_i3	Ribulose bisphosphate carboxylase large chain; RuBisCO large subunit	GO:0009507;GO:0000287;GO:0004497;GO:0016984;GO:0009853;GO:0019253	photorespiration [GO:0009853];reductive pentose-phosphate cycle [GO:0019253]	magnesium ion binding [GO:0000287];monooxygenase activity [GO:0004497];ribulose-bisphosphate carboxylase activity [GO:0016984]	chloroplast [GO:0009507]
		TRINITY_DN28086_c0_g1_i1	Uncharacterized protein	GO:0009536;GO:0000287;GO:0016984;GO:0015977	carbon fixation [GO:0015977]	magnesium ion binding [GO:0000287];ribulose-bisphosphate carboxylase activity [GO:0016984]	plastid [GO:0009536]
		TRINITY_DN28086_c0_g1_i2	Ribulose bisphosphate carboxylase large chain; RuBisCO large subunit	GO:0009507;GO:0000287;GO:0004497;GO:0016984;GO:0009853;GO:0019253	photorespiration [GO:0009853];reductive pentose-phosphate cycle [GO:0019253]	magnesium ion binding [GO:0000287];monooxygenase activity [GO:0004497];ribulose-bisphosphate carboxylase activity [GO:0016984]	chloroplast [GO:0009507]
		TRINITY_DN28084_c0_g1_i3	Uncharacterized protein	GO:0005730;GO:0031298;GO:0003677;GO:0003917;GO:0006338;GO:0007059;GO:0006260;GO:0006265	chromatin remodeling [GO:0006338];chromosome segregation [GO:0007059];DNA replication [GO:0006260];DNA topological change [GO:0006265]	DNA binding [GO:0003677];DNA topoisomerase type I activity [GO:0003917]	nucleolus [GO:0005730];replication fork protection complex [GO:0031298]
		TRINITY_DN91541_c0_g1_i1	Uncharacterized protein
		TRINITY_DN91545_c0_g1_i2	Transcription initiation factor IIF subunit alpha	GO:0005634;GO:0003677;GO:0003743;GO:0032968;GO:0006367	positive regulation of transcription elongation from RNA polymerase II promoter [GO:0032968];transcription initiation from RNA polymerase II promoter [GO:0006367]	DNA binding [GO:0003677];translation initiation factor activity [GO:0003743]	nucleus [GO:0005634]
		TRINITY_DN91545_c0_g1_i1	Transcription initiation factor IIF subunit alpha	GO:0005634;GO:0003677;GO:0003743;GO:0032968;GO:0006367	positive regulation of transcription elongation from RNA polymerase II promoter [GO:0032968];transcription initiation from RNA polymerase II promoter [GO:0006367]	DNA binding [GO:0003677];translation initiation factor activity [GO:0003743]	nucleus [GO:0005634]
		TRINITY_DN91593_c0_g1_i1	Uncharacterized protein	GO:0016021			integral component of membrane [GO:0016021]
		TRINITY_DN91593_c0_g2_i1	Uncharacterized protein	GO:0016021			integral component of membrane [GO:0016021]
		TRINITY_DN91585_c0_g1_i1	Potassium voltage-gated channel subfamily H member 7; Serine/threonine-protein kinase Sgk3	GO:0005524;GO:0035091;GO:0004674		ATP binding [GO:0005524];phosphatidylinositol binding [GO:0035091];protein serine/threonine kinase activity [GO:0004674]
		TRINITY_DN91588_c0_g1_i1	2-oxoisovalerate dehydrogenase subunit beta	GO:0003824;GO:0008152	metabolic process [GO:0008152]	catalytic activity [GO:0003824]
		TRINITY_DN91587_c0_g1_i1	Uncharacterized protein	GO:0005783;GO:0016021;GO:0005634;GO:0003677;GO:0050291;GO:0046513	ceramide biosynthetic process [GO:0046513]	DNA binding [GO:0003677];sphingosine N-acyltransferase activity [GO:0050291]	endoplasmic reticulum [GO:0005783];integral component of membrane [GO:0016021];nucleus [GO:0005634]
		TRINITY_DN91537_c0_g1_i1	Uncharacterized protein
		TRINITY_DN91537_c0_g1_i2	Uncharacterized protein
		TRINITY_DN91537_c0_g1_i3	Uncharacterized protein
		TRINITY_DN91571_c0_g1_i1	Uncharacterized protein	GO:0004190		aspartic-type endopeptidase activity [GO:0004190]
		TRINITY_DN91571_c0_g2_i1	Uncharacterized protein	GO:0004190		aspartic-type endopeptidase activity [GO:0004190]
		TRINITY_DN91539_c0_g1_i1	Uncharacterized protein
		TRINITY_DN91532_c0_g1_i1	Histone-lysine N-methyltransferase, H3 lysine-9 specific SUVH6	GO:0005694;GO:0005634;GO:0018024;GO:0008270		histone-lysine N-methyltransferase activity [GO:0018024];zinc ion binding [GO:0008270]	chromosome [GO:0005694];nucleus [GO:0005634]
		TRINITY_DN91559_c0_g1_i1	Lon protease homolog, mitochondrial	GO:0005759;GO:0005524;GO:0004176;GO:0043565;GO:0004252;GO:0034599;GO:0051131;GO:0070407;GO:0006515;GO:0090296	cellular response to oxidative stress [GO:0034599];chaperone-mediated protein complex assembly [GO:0051131];oxidation-dependent protein catabolic process [GO:0070407];protein quality control for misfolded or incompletely synthesized proteins [GO:0006515];regulation of mitochondrial DNA replication [GO:0090296]	ATP binding [GO:0005524];ATP-dependent peptidase activity [GO:0004176];sequence-specific DNA binding [GO:0043565];serine-type endopeptidase activity [GO:0004252]	mitochondrial matrix [GO:0005759]
		TRINITY_DN91514_c0_g1_i2	Thiol protease	GO:0008234		cysteine-type peptidase activity [GO:0008234]
		TRINITY_DN91514_c0_g1_i1	Thiol protease	GO:0008234		cysteine-type peptidase activity [GO:0008234]
		TRINITY_DN91551_c0_g1_i2	Uncharacterized protein
		TRINITY_DN91533_c0_g1_i3	Uncharacterized protein	GO:0016021;GO:0005524;GO:0030247;GO:0004672		ATP binding [GO:0005524];polysaccharide binding [GO:0030247];protein kinase activity [GO:0004672]	integral component of membrane [GO:0016021]
		TRINITY_DN91533_c0_g1_i2	Uncharacterized protein	GO:0016021;GO:0005524;GO:0030247;GO:0004672		ATP binding [GO:0005524];polysaccharide binding [GO:0030247];protein kinase activity [GO:0004672]	integral component of membrane [GO:0016021]
		TRINITY_DN91512_c0_g1_i2	Uncharacterized protein	GO:0005634;GO:0003677;GO:0003700;GO:0006351	transcription, DNA-templated [GO:0006351]	DNA binding [GO:0003677];DNA binding transcription factor activity [GO:0003700]	nucleus [GO:0005634]
		TRINITY_DN91512_c0_g1_i1	Uncharacterized protein	GO:0005634;GO:0003677;GO:0003700;GO:0006351	transcription, DNA-templated [GO:0006351]	DNA binding [GO:0003677];DNA binding transcription factor activity [GO:0003700]	nucleus [GO:0005634]
		TRINITY_DN91536_c0_g1_i4	Uncharacterized protein
		TRINITY_DN91536_c1_g1_i1	Uncharacterized protein	GO:0016021;GO:0004190		aspartic-type endopeptidase activity [GO:0004190]	integral component of membrane [GO:0016021]
		TRINITY_DN91507_c0_g1_i1	Enhancer of polycomb-like protein	GO:0032777;GO:0006357;GO:0006351	regulation of transcription from RNA polymerase II promoter [GO:0006357];transcription, DNA-templated [GO:0006351]		Piccolo NuA4 histone acetyltransferase complex [GO:0032777]
		TRINITY_DN91573_c0_g1_i1	Annexin	GO:0005509;GO:0005544		calcium ion binding [GO:0005509];calcium-dependent phospholipid binding [GO:0005544]
		TRINITY_DN91599_c0_g1_i1	Glucose-6-phosphate 1-epimerase	GO:0030246;GO:0047938;GO:0005975	carbohydrate metabolic process [GO:0005975]	carbohydrate binding [GO:0030246];glucose-6-phosphate 1-epimerase activity [GO:0047938]
		TRINITY_DN91599_c0_g1_i2	Glucose-6-phosphate 1-epimerase	GO:0030246;GO:0047938;GO:0005975	carbohydrate metabolic process [GO:0005975]	carbohydrate binding [GO:0030246];glucose-6-phosphate 1-epimerase activity [GO:0047938]
		TRINITY_DN91599_c0_g1_i3	Glucose-6-phosphate 1-epimerase	GO:0030246;GO:0047938;GO:0005975	carbohydrate metabolic process [GO:0005975]	carbohydrate binding [GO:0030246];glucose-6-phosphate 1-epimerase activity [GO:0047938]
		TRINITY_DN91564_c0_g1_i1	60S ribosomal protein, putative	GO:0005840;GO:0003735;GO:0006412	translation [GO:0006412]	structural constituent of ribosome [GO:0003735]	ribosome [GO:0005840]
		TRINITY_DN91500_c0_g1_i1	Uncharacterized protein
		TRINITY_DN91500_c0_g1_i2	Uncharacterized protein
		TRINITY_DN91586_c0_g1_i1	Uncharacterized protein	GO:0016021			integral component of membrane [GO:0016021]
		TRINITY_DN91544_c0_g1_i1	Uncharacterized protein
		TRINITY_DN91544_c0_g1_i2	Uncharacterized protein
		TRINITY_DN91562_c0_g1_i1	Uncharacterized protein
		TRINITY_DN91594_c1_g1_i1	Uncharacterized protein	GO:0004553;GO:0005975	carbohydrate metabolic process [GO:0005975]	hydrolase activity, hydrolyzing O-glycosyl compounds [GO:0004553]
		TRINITY_DN91596_c0_g1_i1	Uncharacterized protein
		TRINITY_DN91576_c0_g1_i1	Retrotransposon protein, putative, unclassified	GO:0004190;GO:0003676;GO:0015074	DNA integration [GO:0015074]	aspartic-type endopeptidase activity [GO:0004190];nucleic acid binding [GO:0003676]
		TRINITY_DN91578_c0_g1_i2	Uncharacterized protein
		TRINITY_DN91578_c0_g1_i1	Uncharacterized protein
		TRINITY_DN91519_c0_g1_i1	Pectinesterase	GO:0005618;GO:0005576;GO:0045330;GO:0004857;GO:0030599;GO:0042545;GO:0045490	cell wall modification [GO:0042545];pectin catabolic process [GO:0045490]	aspartyl esterase activity [GO:0045330];enzyme inhibitor activity [GO:0004857];pectinesterase activity [GO:0030599]	cell wall [GO:0005618];extracellular region [GO:0005576]
		TRINITY_DN91550_c0_g2_i3	Uncharacterized protein	GO:0046872		metal ion binding [GO:0046872]
		TRINITY_DN91550_c0_g2_i1	Uncharacterized protein	GO:0046872		metal ion binding [GO:0046872]
		TRINITY_DN91531_c0_g1_i1	Putative LRR receptor-like serine/threonine-protein kinase	GO:0016021;GO:0005524;GO:0004713		ATP binding [GO:0005524];protein tyrosine kinase activity [GO:0004713]	integral component of membrane [GO:0016021]
		TRINITY_DN91580_c0_g1_i9	Early-methionine-labelled polypeptide
		TRINITY_DN91580_c0_g1_i3	Early-methionine-labelled polypeptide
		TRINITY_DN91580_c0_g1_i6	Early-methionine-labelled polypeptide
		TRINITY_DN91580_c0_g1_i5	Em protein
		TRINITY_DN91572_c0_g1_i1	Uncharacterized protein
		TRINITY_DN91572_c0_g1_i2	Uncharacterized protein
		TRINITY_DN91527_c0_g1_i1	Uncharacterized protein
		TRINITY_DN91527_c0_g1_i3	Putative disease resistance RPP13-like protein 3	GO:0043531		ADP binding [GO:0043531]
		TRINITY_DN91527_c0_g1_i2	Uncharacterized protein
		TRINITY_DN91527_c0_g3_i1	Uncharacterized protein
		TRINITY_DN91527_c0_g4_i1	Uncharacterized protein
		TRINITY_DN91527_c0_g5_i1	Uncharacterized protein	GO:0005737;GO:0030145;GO:0004619;GO:0006007	glucose catabolic process [GO:0006007]	manganese ion binding [GO:0030145];phosphoglycerate mutase activity [GO:0004619]	cytoplasm [GO:0005737]
		TRINITY_DN91527_c0_g6_i1	Protein DETOXIFICATION; Multidrug and toxic compound extrusion protein	GO:0016021;GO:0015297;GO:0015238		antiporter activity [GO:0015297];drug transmembrane transporter activity [GO:0015238]	integral component of membrane [GO:0016021]
		TRINITY_DN91524_c0_g1_i1	Cathepsin L-like cysteine proteinase	GO:0008234		cysteine-type peptidase activity [GO:0008234]
		TRINITY_DN91524_c0_g1_i3	Cathepsin L-like cysteine proteinase	GO:0008234		cysteine-type peptidase activity [GO:0008234]
		TRINITY_DN91524_c0_g2_i1	Cysteine protease	GO:0008234		cysteine-type peptidase activity [GO:0008234]
		TRINITY_DN91548_c0_g1_i1	Uncharacterized protein
		TRINITY_DN91548_c0_g1_i2	Uncharacterized protein
		TRINITY_DN91581_c0_g1_i2	Uncharacterized protein	GO:0016021			integral component of membrane [GO:0016021]
		TRINITY_DN91581_c0_g2_i2	Uncharacterized protein	GO:0016021			integral component of membrane [GO:0016021]
		TRINITY_DN91581_c0_g2_i1	Uncharacterized protein	GO:0016021			integral component of membrane [GO:0016021]
		TRINITY_DN91560_c0_g1_i5	OSJNBb0011N17.2 protein	GO:0003676;GO:0008270		nucleic acid binding [GO:0003676];zinc ion binding [GO:0008270]
		TRINITY_DN91560_c1_g1_i1	Uncharacterized protein	GO:0003676		nucleic acid binding [GO:0003676]
		TRINITY_DN91575_c0_g1_i1	Uncharacterized protein	GO:0050832	defense response to fungus [GO:0050832]
		TRINITY_DN91515_c0_g1_i5	Uncharacterized protein	GO:0003690;GO:0006355	regulation of transcription, DNA-templated [GO:0006355]	double-stranded DNA binding [GO:0003690]
		TRINITY_DN91515_c0_g1_i3	Predicted protein	GO:0003690;GO:0006355	regulation of transcription, DNA-templated [GO:0006355]	double-stranded DNA binding [GO:0003690]
		TRINITY_DN91515_c0_g1_i4	Predicted protein	GO:0003690;GO:0006355	regulation of transcription, DNA-templated [GO:0006355]	double-stranded DNA binding [GO:0003690]
		TRINITY_DN91515_c0_g1_i7	Uncharacterized protein	GO:0003690;GO:0006355	regulation of transcription, DNA-templated [GO:0006355]	double-stranded DNA binding [GO:0003690]
		TRINITY_DN91515_c0_g1_i9	Predicted protein	GO:0003690;GO:0006355	regulation of transcription, DNA-templated [GO:0006355]	double-stranded DNA binding [GO:0003690]
		TRINITY_DN91515_c0_g1_i6	Uncharacterized protein	GO:0003690;GO:0006355	regulation of transcription, DNA-templated [GO:0006355]	double-stranded DNA binding [GO:0003690]
		TRINITY_DN91515_c0_g1_i10	Predicted protein	GO:0003690;GO:0006355	regulation of transcription, DNA-templated [GO:0006355]	double-stranded DNA binding [GO:0003690]
		TRINITY_DN91595_c0_g1_i1	Predicted protein	GO:0022625;GO:0003723;GO:0003735;GO:0002181;GO:0000463	cytoplasmic translation [GO:0002181];maturation of LSU-rRNA from tricistronic rRNA transcript (SSU-rRNA, 5.8S rRNA, LSU-rRNA) [GO:0000463]	RNA binding [GO:0003723];structural constituent of ribosome [GO:0003735]	cytosolic large ribosomal subunit [GO:0022625]
		TRINITY_DN91566_c0_g1_i1	Uncharacterized protein
		TRINITY_DN91566_c0_g2_i2	Uncharacterized protein
		TRINITY_DN91566_c0_g2_i1	Uncharacterized protein
		TRINITY_DN91522_c0_g1_i2	Uncharacterized protein	GO:0005840;GO:0003735;GO:0006412	translation [GO:0006412]	structural constituent of ribosome [GO:0003735]	ribosome [GO:0005840]
		TRINITY_DN91522_c0_g1_i1	Uncharacterized protein	GO:0005840;GO:0003735;GO:0006412	translation [GO:0006412]	structural constituent of ribosome [GO:0003735]	ribosome [GO:0005840]
		TRINITY_DN91511_c0_g1_i1	Uncharacterized protein
		TRINITY_DN91535_c0_g1_i4	Uncharacterized protein	GO:0033743;GO:0030091;GO:0006979	protein repair [GO:0030091];response to oxidative stress [GO:0006979]	peptide-methionine (R)-S-oxide reductase activity [GO:0033743]
		TRINITY_DN91535_c0_g1_i3	Peptide methionine sulfoxide reductase B5	GO:0016021;GO:0033743		peptide-methionine (R)-S-oxide reductase activity [GO:0033743]	integral component of membrane [GO:0016021]
		TRINITY_DN91535_c0_g1_i1	Uncharacterized protein	GO:0033743;GO:0030091;GO:0006979	protein repair [GO:0030091];response to oxidative stress [GO:0006979]	peptide-methionine (R)-S-oxide reductase activity [GO:0033743]
		TRINITY_DN91535_c0_g2_i2	Methionine sulfoxide reductase	GO:0033743;GO:0030091;GO:0006979	protein repair [GO:0030091];response to oxidative stress [GO:0006979]	peptide-methionine (R)-S-oxide reductase activity [GO:0033743]
		TRINITY_DN91535_c0_g2_i1	Methionine sulfoxide reductase	GO:0033743;GO:0030091;GO:0006979	protein repair [GO:0030091];response to oxidative stress [GO:0006979]	peptide-methionine (R)-S-oxide reductase activity [GO:0033743]
		TRINITY_DN91535_c0_g2_i3	Methionine sulfoxide reductase	GO:0033743;GO:0030091;GO:0006979	protein repair [GO:0030091];response to oxidative stress [GO:0006979]	peptide-methionine (R)-S-oxide reductase activity [GO:0033743]
		TRINITY_DN91554_c0_g1_i2	Uncharacterized protein
		TRINITY_DN91554_c0_g1_i1	Uncharacterized protein
		TRINITY_DN91577_c0_g1_i1	Uncharacterized protein	GO:0003676;GO:0008270		nucleic acid binding [GO:0003676];zinc ion binding [GO:0008270]
		TRINITY_DN91577_c0_g2_i1	Uncharacterized protein
		TRINITY_DN91565_c0_g1_i1	Dirigent protein	GO:0048046;GO:0016853		isomerase activity [GO:0016853]	apoplast [GO:0048046]
		TRINITY_DN91565_c0_g1_i2	Dirigent protein	GO:0048046;GO:0016853		isomerase activity [GO:0016853]	apoplast [GO:0048046]
		TRINITY_DN91543_c0_g1_i6	Uncharacterized protein
		TRINITY_DN91543_c0_g1_i5	Uncharacterized protein
		TRINITY_DN91568_c0_g1_i1	Uncharacterized protein	GO:0003676;GO:0015074	DNA integration [GO:0015074]	nucleic acid binding [GO:0003676]
		TRINITY_DN91568_c0_g2_i1	Uncharacterized protein	GO:0003676		nucleic acid binding [GO:0003676]
		TRINITY_DN91568_c1_g1_i1	Uncharacterized protein	GO:0003676		nucleic acid binding [GO:0003676]
		TRINITY_DN91589_c0_g1_i1	Receptor expression-enhancing protein	GO:0016021			integral component of membrane [GO:0016021]
		TRINITY_DN91589_c0_g1_i2	Receptor expression-enhancing protein	GO:0016021			integral component of membrane [GO:0016021]
		TRINITY_DN91505_c0_g1_i1	Uncharacterized protein	GO:0005840;GO:0003735;GO:0006412	translation [GO:0006412]	structural constituent of ribosome [GO:0003735]	ribosome [GO:0005840]
		TRINITY_DN91540_c0_g2_i1	Myosin regulatory light chain	GO:0005509		calcium ion binding [GO:0005509]
		TRINITY_DN91513_c0_g1_i1	Uncharacterized protein	GO:0051513	regulation of monopolar cell growth [GO:0051513]
		TRINITY_DN91504_c0_g1_i1	Uncharacterized protein
		TRINITY_DN30105_c0_g1_i5	Uncharacterized protein
		TRINITY_DN30105_c0_g1_i3	Uncharacterized protein	GO:0016021			integral component of membrane [GO:0016021]
		TRINITY_DN30105_c0_g1_i1	Uncharacterized protein	GO:0016021			integral component of membrane [GO:0016021]
		TRINITY_DN30105_c0_g1_i2	Uncharacterized protein
		TRINITY_DN30105_c0_g1_i4	Uncharacterized protein	GO:0016021			integral component of membrane [GO:0016021]
		TRINITY_DN30105_c0_g1_i6	Uncharacterized protein	GO:0016021			integral component of membrane [GO:0016021]
		TRINITY_DN30180_c0_g2_i6	Uncharacterized protein
		TRINITY_DN30180_c0_g2_i2	Uncharacterized protein
		TRINITY_DN30180_c0_g2_i3	Uncharacterized protein
		TRINITY_DN30180_c0_g2_i5	Uncharacterized protein
		TRINITY_DN30180_c0_g2_i7	Uncharacterized protein
		TRINITY_DN30180_c0_g2_i8	Uncharacterized protein
		TRINITY_DN30180_c0_g2_i4	Uncharacterized protein
		TRINITY_DN30180_c0_g1_i6	Uncharacterized protein	GO:0003676		nucleic acid binding [GO:0003676]
		TRINITY_DN30180_c0_g1_i5	Uncharacterized protein	GO:0003676		nucleic acid binding [GO:0003676]
		TRINITY_DN30180_c0_g1_i4	Uncharacterized protein	GO:0003676		nucleic acid binding [GO:0003676]
		TRINITY_DN30180_c0_g1_i2	Uncharacterized protein	GO:0003676		nucleic acid binding [GO:0003676]
		TRINITY_DN30180_c0_g1_i3	Uncharacterized protein	GO:0003676		nucleic acid binding [GO:0003676]
		TRINITY_DN30180_c1_g1_i1	Histone-lysine N-methyltransferase, H3 lysine-9 specific SUVH4	GO:0005694;GO:0005634;GO:0018024;GO:0008270		histone-lysine N-methyltransferase activity [GO:0018024];zinc ion binding [GO:0008270]	chromosome [GO:0005694];nucleus [GO:0005634]
		TRINITY_DN30180_c1_g1_i3	Histone-lysine N-methyltransferase, H3 lysine-9 specific SUVH4	GO:0005694;GO:0005634;GO:0018024;GO:0008270		histone-lysine N-methyltransferase activity [GO:0018024];zinc ion binding [GO:0008270]	chromosome [GO:0005694];nucleus [GO:0005634]
		TRINITY_DN30180_c1_g1_i2	Histone-lysine N-methyltransferase, H3 lysine-9 specific SUVH4	GO:0005694;GO:0005634;GO:0018024;GO:0008270		histone-lysine N-methyltransferase activity [GO:0018024];zinc ion binding [GO:0008270]	chromosome [GO:0005694];nucleus [GO:0005634]
		TRINITY_DN30180_c1_g1_i6	Histone-lysine N-methyltransferase, H3 lysine-9 specific SUVH4	GO:0005694;GO:0005634;GO:0018024;GO:0008270		histone-lysine N-methyltransferase activity [GO:0018024];zinc ion binding [GO:0008270]	chromosome [GO:0005694];nucleus [GO:0005634]
		TRINITY_DN30189_c0_g1_i1	Uncharacterized protein
		TRINITY_DN30198_c1_g1_i1	Actin
		TRINITY_DN30198_c2_g1_i1	Actin
		TRINITY_DN30198_c5_g1_i1	Actin
		TRINITY_DN30107_c0_g1_i1	Uncharacterized protein
		TRINITY_DN30107_c0_g2_i1	Uncharacterized protein	GO:0003676		nucleic acid binding [GO:0003676]
		TRINITY_DN30107_c1_g1_i3	Uncharacterized protein
		TRINITY_DN30107_c1_g1_i4	Uncharacterized protein
		TRINITY_DN30107_c2_g1_i1	Uncharacterized protein
		TRINITY_DN30107_c3_g1_i1	Uncharacterized protein	GO:0003676		nucleic acid binding [GO:0003676]
		TRINITY_DN30147_c0_g1_i1	Uncharacterized protein
		TRINITY_DN30147_c0_g1_i3	Uncharacterized protein
		TRINITY_DN30147_c0_g1_i4	Uncharacterized protein
		TRINITY_DN30152_c0_g1_i1	Putative LRR receptor-like serine/threonine-protein kinase	GO:0016021;GO:0005524;GO:0004672		ATP binding [GO:0005524];protein kinase activity [GO:0004672]	integral component of membrane [GO:0016021]
		TRINITY_DN30126_c0_g1_i5	Uncharacterized protein	GO:0005524;GO:0004672		ATP binding [GO:0005524];protein kinase activity [GO:0004672]
		TRINITY_DN30126_c0_g1_i4	Uncharacterized protein	GO:0005524;GO:0004672		ATP binding [GO:0005524];protein kinase activity [GO:0004672]
		TRINITY_DN30126_c0_g1_i1	Uncharacterized protein	GO:0005524;GO:0004672		ATP binding [GO:0005524];protein kinase activity [GO:0004672]
		TRINITY_DN30122_c0_g1_i4	Uncharacterized protein	GO:0016021;GO:0005524;GO:0042626		ATP binding [GO:0005524];ATPase activity, coupled to transmembrane movement of substances [GO:0042626]	integral component of membrane [GO:0016021]
		TRINITY_DN30122_c0_g1_i1	Uncharacterized protein	GO:0016021;GO:0005524;GO:0042626		ATP binding [GO:0005524];ATPase activity, coupled to transmembrane movement of substances [GO:0042626]	integral component of membrane [GO:0016021]
		TRINITY_DN30122_c0_g2_i2	ABC transporter B family member 19	GO:0016021;GO:0005886;GO:0005524;GO:0042626;GO:0010329;GO:0010541;GO:0043481;GO:0010540;GO:0090691;GO:0048527;GO:0009640;GO:0009958;GO:0008361;GO:0009733;GO:0009637;GO:0010218;GO:0048443	acropetal auxin transport [GO:0010541];anthocyanin accumulation in tissues in response to UV light [GO:0043481];basipetal auxin transport [GO:0010540];formation of plant organ boundary [GO:0090691];lateral root development [GO:0048527];photomorphogenesis [GO:0009640];positive gravitropism [GO:0009958];regulation of cell size [GO:0008361];response to auxin [GO:0009733];response to blue light [GO:0…	ATP binding [GO:0005524];ATPase activity, coupled to transmembrane movement of substances [GO:0042626];auxin efflux transmembrane transporter activity [GO:0010329]	integral component of membrane [GO:0016021];plasma membrane [GO:0005886]
		TRINITY_DN30122_c0_g2_i1	Uncharacterized protein	GO:0016021;GO:0005524;GO:0042626		ATP binding [GO:0005524];ATPase activity, coupled to transmembrane movement of substances [GO:0042626]	integral component of membrane [GO:0016021]
		TRINITY_DN30122_c0_g3_i1	Uncharacterized protein	GO:0016021;GO:0005524;GO:0042626		ATP binding [GO:0005524];ATPase activity, coupled to transmembrane movement of substances [GO:0042626]	integral component of membrane [GO:0016021]
		TRINITY_DN30130_c0_g1_i2	Uncharacterized protein	GO:0016021;GO:0005524;GO:0030247;GO:0004672		ATP binding [GO:0005524];polysaccharide binding [GO:0030247];protein kinase activity [GO:0004672]	integral component of membrane [GO:0016021]
		TRINITY_DN30130_c0_g1_i6	Uncharacterized protein	GO:0016021;GO:0005524;GO:0030247;GO:0004672		ATP binding [GO:0005524];polysaccharide binding [GO:0030247];protein kinase activity [GO:0004672]	integral component of membrane [GO:0016021]
		TRINITY_DN30130_c0_g1_i5	Uncharacterized protein	GO:0016021;GO:0005524;GO:0030247;GO:0004672		ATP binding [GO:0005524];polysaccharide binding [GO:0030247];protein kinase activity [GO:0004672]	integral component of membrane [GO:0016021]
		TRINITY_DN30130_c0_g1_i1	Uncharacterized protein	GO:0016021;GO:0005524;GO:0030247;GO:0004672		ATP binding [GO:0005524];polysaccharide binding [GO:0030247];protein kinase activity [GO:0004672]	integral component of membrane [GO:0016021]
		TRINITY_DN30130_c0_g1_i3	Uncharacterized protein	GO:0016021;GO:0005524;GO:0030247;GO:0004672		ATP binding [GO:0005524];polysaccharide binding [GO:0030247];protein kinase activity [GO:0004672]	integral component of membrane [GO:0016021]
		TRINITY_DN30140_c0_g1_i1	Uncharacterized protein
		TRINITY_DN30140_c0_g1_i2	Uncharacterized protein
		TRINITY_DN30140_c0_g1_i3	Uncharacterized protein
		TRINITY_DN30140_c0_g2_i1	Uncharacterized protein
		TRINITY_DN30140_c0_g2_i2	Uncharacterized protein
		TRINITY_DN30140_c0_g3_i1	Uncharacterized protein
		TRINITY_DN30140_c0_g3_i2	Uncharacterized protein
		TRINITY_DN30140_c1_g1_i2	Uncharacterized protein
		TRINITY_DN30140_c1_g1_i1	Uncharacterized protein
		TRINITY_DN30101_c0_g1_i1	Uncharacterized protein	GO:0003676		nucleic acid binding [GO:0003676]
		TRINITY_DN30101_c0_g1_i2	Uncharacterized protein	GO:0003676		nucleic acid binding [GO:0003676]
		TRINITY_DN30101_c0_g2_i6	Uncharacterized protein	GO:0003676		nucleic acid binding [GO:0003676]
		TRINITY_DN30101_c0_g2_i4	Uncharacterized protein	GO:0003676		nucleic acid binding [GO:0003676]
		TRINITY_DN30101_c0_g2_i8	Uncharacterized protein	GO:0003676		nucleic acid binding [GO:0003676]
		TRINITY_DN30169_c0_g1_i1	Uncharacterized protein	GO:0005524;GO:0003972;GO:0006388	tRNA splicing, via endonucleolytic cleavage and ligation [GO:0006388]	ATP binding [GO:0005524];RNA ligase (ATP) activity [GO:0003972]
		TRINITY_DN30169_c0_g1_i3	Uncharacterized protein	GO:0005524;GO:0003972;GO:0006388	tRNA splicing, via endonucleolytic cleavage and ligation [GO:0006388]	ATP binding [GO:0005524];RNA ligase (ATP) activity [GO:0003972]
		TRINITY_DN30169_c0_g1_i5	Uncharacterized protein	GO:0005524;GO:0003972;GO:0006388	tRNA splicing, via endonucleolytic cleavage and ligation [GO:0006388]	ATP binding [GO:0005524];RNA ligase (ATP) activity [GO:0003972]
		TRINITY_DN30167_c0_g1_i3	Uncharacterized protein
		TRINITY_DN30167_c0_g1_i4	Uncharacterized protein
		TRINITY_DN30167_c0_g1_i6	Uncharacterized protein
		TRINITY_DN30167_c0_g1_i1	Uncharacterized protein
		TRINITY_DN30167_c0_g1_i2	Uncharacterized protein
		TRINITY_DN30167_c1_g1_i2	Uncharacterized protein
		TRINITY_DN30167_c1_g1_i3	Uncharacterized protein
		TRINITY_DN30167_c3_g1_i1	Uncharacterized protein
		TRINITY_DN30133_c0_g3_i1	Uncharacterized protein	GO:0003676		nucleic acid binding [GO:0003676]
		TRINITY_DN30139_c0_g2_i2	Uncharacterized protein
		TRINITY_DN30139_c0_g2_i1	Uncharacterized protein
		TRINITY_DN30195_c0_g1_i5	Beta-fructofuranosidase, insoluble isoenzyme 1; Cell wall beta-fructosidase 1; Invertase 1; OsCIN1; Sucrose hydrolase 1	GO:0048046;GO:0005618;GO:0004575;GO:0005975	carbohydrate metabolic process [GO:0005975]	sucrose alpha-glucosidase activity [GO:0004575]	apoplast [GO:0048046];cell wall [GO:0005618]
		TRINITY_DN30195_c0_g1_i2	Beta-fructofuranosidase, insoluble isoenzyme 1; Cell wall beta-fructosidase 1; Invertase 1; OsCIN1; Sucrose hydrolase 1	GO:0048046;GO:0005618;GO:0004575;GO:0005975	carbohydrate metabolic process [GO:0005975]	sucrose alpha-glucosidase activity [GO:0004575]	apoplast [GO:0048046];cell wall [GO:0005618]
		TRINITY_DN30170_c0_g1_i4	Polyubiquitin
		TRINITY_DN30170_c0_g1_i3	Polyubiquitin
		TRINITY_DN30170_c0_g2_i1	Uncharacterized protein	GO:0005634;GO:0000981;GO:0008270		RNA polymerase II transcription factor activity, sequence-specific DNA binding [GO:0000981];zinc ion binding [GO:0008270]	nucleus [GO:0005634]
		TRINITY_DN30170_c0_g3_i1	Uncharacterized protein
		TRINITY_DN30170_c0_g3_i2	Uncharacterized protein
		TRINITY_DN30170_c1_g1_i1	Uncharacterized protein	GO:0005840;GO:0003735;GO:0006412	translation [GO:0006412]	structural constituent of ribosome [GO:0003735]	ribosome [GO:0005840]
		TRINITY_DN30170_c2_g1_i3	Ubiquitin
		TRINITY_DN30170_c2_g1_i1	polyubiquitin-like
		TRINITY_DN30115_c0_g1_i1	Uncharacterized protein	GO:0000287;GO:0010333;GO:0008152	metabolic process [GO:0008152]	magnesium ion binding [GO:0000287];terpene synthase activity [GO:0010333]
		TRINITY_DN30160_c0_g1_i6	Uncharacterized protein
		TRINITY_DN30160_c0_g1_i3	Uncharacterized protein
		TRINITY_DN30160_c0_g1_i1	Pollen-specific leucine-rich repeat extensin-like protein 1
		TRINITY_DN30160_c0_g1_i4	Uncharacterized protein
		TRINITY_DN30112_c0_g1_i5	Uncharacterized protein
		TRINITY_DN30112_c0_g1_i2	Polygalacturonase	GO:0005576;GO:0004650;GO:0005975;GO:0071555	carbohydrate metabolic process [GO:0005975];cell wall organization [GO:0071555]	polygalacturonase activity [GO:0004650]	extracellular region [GO:0005576]
		TRINITY_DN30112_c0_g1_i1	Uncharacterized protein
		TRINITY_DN30184_c0_g1_i1	1,2-dihydroxy-3-keto-5-methylthiopentene dioxygenase; Acireductone dioxygenase (Fe(2+)-requiring); ARD; Fe-ARD	GO:0005737;GO:0005634;GO:0010309;GO:0005506;GO:0019509	L-methionine salvage from methylthioadenosine [GO:0019509]	acireductone dioxygenase [iron(II)-requiring] activity [GO:0010309];iron ion binding [GO:0005506]	cytoplasm [GO:0005737];nucleus [GO:0005634]
		TRINITY_DN30184_c0_g1_i2	1,2-dihydroxy-3-keto-5-methylthiopentene dioxygenase; Acireductone dioxygenase (Fe(2+)-requiring); ARD; Fe-ARD	GO:0005737;GO:0005634;GO:0010309;GO:0005506;GO:0019509	L-methionine salvage from methylthioadenosine [GO:0019509]	acireductone dioxygenase [iron(II)-requiring] activity [GO:0010309];iron ion binding [GO:0005506]	cytoplasm [GO:0005737];nucleus [GO:0005634]
		TRINITY_DN30188_c0_g1_i1	Uncharacterized protein	GO:0016021;GO:0015299		solute [GO:0015299]	integral component of membrane [GO:0016021]
		TRINITY_DN30188_c0_g2_i1	Sodium/hydrogen exchanger	GO:0016021;GO:0015385;GO:0006885	regulation of pH [GO:0006885]	sodium [GO:0015385]	integral component of membrane [GO:0016021]
		TRINITY_DN30143_c0_g1_i3	Uncharacterized protein	GO:0016021			integral component of membrane [GO:0016021]
		TRINITY_DN30143_c0_g1_i4	Uncharacterized protein	GO:0016021			integral component of membrane [GO:0016021]
		TRINITY_DN30143_c0_g1_i6	Uncharacterized protein	GO:0016021			integral component of membrane [GO:0016021]
		TRINITY_DN30143_c0_g1_i1	Uncharacterized protein	GO:0016021			integral component of membrane [GO:0016021]
		TRINITY_DN30143_c0_g1_i7	Uncharacterized protein	GO:0016021			integral component of membrane [GO:0016021]
		TRINITY_DN30143_c0_g1_i2	Uncharacterized protein	GO:0016021			integral component of membrane [GO:0016021]
		TRINITY_DN30143_c0_g1_i5	Uncharacterized protein	GO:0016021			integral component of membrane [GO:0016021]
		TRINITY_DN30143_c0_g1_i9	Uncharacterized protein	GO:0016021			integral component of membrane [GO:0016021]
		TRINITY_DN30158_c0_g1_i11	Uncharacterized protein	GO:0016021;GO:0005886;GO:0005524;GO:0004674;GO:0006468;GO:0048544	protein phosphorylation [GO:0006468];recognition of pollen [GO:0048544]	ATP binding [GO:0005524];protein serine/threonine kinase activity [GO:0004674]	integral component of membrane [GO:0016021];plasma membrane [GO:0005886]
		TRINITY_DN30158_c0_g1_i10	Uncharacterized protein	GO:0016021;GO:0005886;GO:0005524;GO:0004674;GO:0006468;GO:0048544	protein phosphorylation [GO:0006468];recognition of pollen [GO:0048544]	ATP binding [GO:0005524];protein serine/threonine kinase activity [GO:0004674]	integral component of membrane [GO:0016021];plasma membrane [GO:0005886]
		TRINITY_DN30166_c0_g1_i4	Uncharacterized protein	GO:0005524		ATP binding [GO:0005524]
		TRINITY_DN30166_c0_g1_i5	Uncharacterized protein	GO:0005524		ATP binding [GO:0005524]
		TRINITY_DN30166_c0_g1_i1	Uncharacterized protein
		TRINITY_DN30166_c0_g1_i3	Lupus brain antigen 1-like protein	GO:0005524		ATP binding [GO:0005524]
		TRINITY_DN30166_c0_g1_i2	Uncharacterized protein	GO:0005524		ATP binding [GO:0005524]
		TRINITY_DN30148_c0_g1_i8	Uncharacterized protein
		TRINITY_DN30148_c0_g1_i3	Uncharacterized protein
		TRINITY_DN30148_c0_g1_i7	Uncharacterized protein
		TRINITY_DN30148_c0_g1_i5	Uncharacterized protein
		TRINITY_DN30148_c0_g1_i1	Uncharacterized protein
		TRINITY_DN30148_c0_g1_i4	Uncharacterized protein
		TRINITY_DN30148_c0_g1_i9	Uncharacterized protein
		TRINITY_DN30148_c0_g1_i10	Uncharacterized protein
		TRINITY_DN30148_c0_g2_i1	Uncharacterized protein
		TRINITY_DN30148_c0_g2_i2	Uncharacterized protein
		TRINITY_DN30148_c1_g2_i1	Uncharacterized protein
		TRINITY_DN30138_c0_g1_i2	Serine/threonine protein phosphatase 2A regulatory subunit	GO:0000159;GO:0019888;GO:0007165	signal transduction [GO:0007165]	protein phosphatase regulator activity [GO:0019888]	protein phosphatase type 2A complex [GO:0000159]
		TRINITY_DN30138_c0_g1_i1	Serine/threonine protein phosphatase 2A regulatory subunit	GO:0000159;GO:0019888;GO:0007165	signal transduction [GO:0007165]	protein phosphatase regulator activity [GO:0019888]	protein phosphatase type 2A complex [GO:0000159]
		TRINITY_DN30109_c0_g1_i1	Uncharacterized protein
		TRINITY_DN30164_c0_g1_i1	Uncharacterized protein
		TRINITY_DN30132_c0_g1_i2	Uncharacterized protein	GO:0004725;GO:0008138		protein tyrosine phosphatase activity [GO:0004725];protein tyrosine/serine/threonine phosphatase activity [GO:0008138]
		TRINITY_DN30135_c1_g1_i1	Uncharacterized protein	GO:0016021;GO:0022857		transmembrane transporter activity [GO:0022857]	integral component of membrane [GO:0016021]
		TRINITY_DN30100_c0_g1_i7	Uncharacterized protein	GO:0043531		ADP binding [GO:0043531]
		TRINITY_DN30100_c0_g1_i4	Uncharacterized protein	GO:0043531		ADP binding [GO:0043531]
		TRINITY_DN30100_c0_g1_i3	Uncharacterized protein	GO:0043531		ADP binding [GO:0043531]
		TRINITY_DN30100_c0_g1_i5	Disease resistance protein RPM1	GO:0043531		ADP binding [GO:0043531]
		TRINITY_DN30100_c0_g1_i2	Uncharacterized protein	GO:0043531		ADP binding [GO:0043531]
		TRINITY_DN30100_c0_g1_i6	Uncharacterized protein	GO:0043531		ADP binding [GO:0043531]
		TRINITY_DN30100_c0_g1_i1	Uncharacterized protein	GO:0043531		ADP binding [GO:0043531]
		TRINITY_DN30172_c0_g1_i2	Mitochondrial metalloendopeptidase OMA1	GO:0016021;GO:0004222		metalloendopeptidase activity [GO:0004222]	integral component of membrane [GO:0016021]
		TRINITY_DN30172_c0_g1_i3	Mitochondrial metalloendopeptidase OMA1	GO:0016021;GO:0004222		metalloendopeptidase activity [GO:0004222]	integral component of membrane [GO:0016021]
		TRINITY_DN30172_c0_g1_i1	Mitochondrial metalloendopeptidase OMA1	GO:0016021;GO:0004222		metalloendopeptidase activity [GO:0004222]	integral component of membrane [GO:0016021]
		TRINITY_DN30172_c0_g2_i1	Pyrophosphate--fructose 6-phosphate 1-phosphotransferase subunit beta; PFP; 6-phosphofructokinase, pyrophosphate dependent; PPi-PFK; Pyrophosphate-dependent 6-phosphofructose-1-kinase	GO:0005737;GO:0003872;GO:0005524;GO:0047334;GO:0046872;GO:0006002	fructose 6-phosphate metabolic process [GO:0006002]	6-phosphofructokinase activity [GO:0003872];ATP binding [GO:0005524];diphosphate-fructose-6-phosphate 1-phosphotransferase activity [GO:0047334];metal ion binding [GO:0046872]	cytoplasm [GO:0005737]
		TRINITY_DN30172_c1_g2_i3	Uncharacterized protein	GO:0016021			integral component of membrane [GO:0016021]
		TRINITY_DN30172_c1_g2_i5	Uncharacterized protein
		TRINITY_DN30172_c1_g2_i6	Uncharacterized protein
		TRINITY_DN30119_c1_g1_i8	Uncharacterized protein	GO:0003676;GO:0008270		nucleic acid binding [GO:0003676];zinc ion binding [GO:0008270]
		TRINITY_DN30119_c1_g1_i2	Uncharacterized protein	GO:0003676;GO:0008270		nucleic acid binding [GO:0003676];zinc ion binding [GO:0008270]
		TRINITY_DN30119_c1_g1_i10	Uncharacterized protein	GO:0003676;GO:0008270		nucleic acid binding [GO:0003676];zinc ion binding [GO:0008270]
		TRINITY_DN30119_c1_g1_i6	Uncharacterized protein	GO:0003676;GO:0008270		nucleic acid binding [GO:0003676];zinc ion binding [GO:0008270]
		TRINITY_DN30119_c1_g1_i7	Uncharacterized protein	GO:0003676;GO:0008270		nucleic acid binding [GO:0003676];zinc ion binding [GO:0008270]
		TRINITY_DN30119_c1_g1_i1	Uncharacterized protein	GO:0016021			integral component of membrane [GO:0016021]
		TRINITY_DN30119_c1_g1_i5	Uncharacterized protein	GO:0003676;GO:0008270		nucleic acid binding [GO:0003676];zinc ion binding [GO:0008270]
		TRINITY_DN30119_c1_g1_i3	Uncharacterized protein	GO:0003676;GO:0008270		nucleic acid binding [GO:0003676];zinc ion binding [GO:0008270]
		TRINITY_DN30119_c1_g1_i9	Uncharacterized protein	GO:0003676;GO:0008270		nucleic acid binding [GO:0003676];zinc ion binding [GO:0008270]
		TRINITY_DN30119_c1_g1_i11	Uncharacterized protein	GO:0016021			integral component of membrane [GO:0016021]
		TRINITY_DN30119_c1_g1_i4	Uncharacterized protein	GO:0003676;GO:0008270		nucleic acid binding [GO:0003676];zinc ion binding [GO:0008270]
		TRINITY_DN30119_c1_g2_i1	Uncharacterized protein	GO:0016021			integral component of membrane [GO:0016021]
		TRINITY_DN30182_c0_g1_i6	Uncharacterized protein	GO:0005739;GO:0003676		nucleic acid binding [GO:0003676]	mitochondrion [GO:0005739]
		TRINITY_DN30182_c0_g1_i2	Uncharacterized protein	GO:0005739;GO:0003676		nucleic acid binding [GO:0003676]	mitochondrion [GO:0005739]
		TRINITY_DN30182_c0_g1_i5	Uncharacterized protein	GO:0005739;GO:0003676		nucleic acid binding [GO:0003676]	mitochondrion [GO:0005739]
		TRINITY_DN30182_c0_g1_i3	Uncharacterized protein	GO:0005739;GO:0003676		nucleic acid binding [GO:0003676]	mitochondrion [GO:0005739]
		TRINITY_DN30182_c0_g1_i4	Uncharacterized protein	GO:0005739;GO:0003676		nucleic acid binding [GO:0003676]	mitochondrion [GO:0005739]
		TRINITY_DN30104_c0_g1_i1	Phosphomannomutase; TaPMM	GO:0005737;GO:0004615;GO:0009298	GDP-mannose biosynthetic process [GO:0009298]	phosphomannomutase activity [GO:0004615]	cytoplasm [GO:0005737]
		TRINITY_DN30104_c0_g1_i3	Phosphomannomutase	GO:0005737;GO:0004615;GO:0009298	GDP-mannose biosynthetic process [GO:0009298]	phosphomannomutase activity [GO:0004615]	cytoplasm [GO:0005737]
		TRINITY_DN30104_c0_g1_i5	Phosphomannomutase	GO:0005737;GO:0004615;GO:0009298	GDP-mannose biosynthetic process [GO:0009298]	phosphomannomutase activity [GO:0004615]	cytoplasm [GO:0005737]
		TRINITY_DN30104_c0_g1_i2	Phosphomannomutase	GO:0005737;GO:0004615;GO:0009298	GDP-mannose biosynthetic process [GO:0009298]	phosphomannomutase activity [GO:0004615]	cytoplasm [GO:0005737]
		TRINITY_DN30104_c0_g2_i1	Phosphomannomutase	GO:0005737;GO:0004615;GO:0009298	GDP-mannose biosynthetic process [GO:0009298]	phosphomannomutase activity [GO:0004615]	cytoplasm [GO:0005737]
		TRINITY_DN30104_c0_g3_i1	Phosphomannomutase	GO:0005737;GO:0004615;GO:0009298	GDP-mannose biosynthetic process [GO:0009298]	phosphomannomutase activity [GO:0004615]	cytoplasm [GO:0005737]
		TRINITY_DN30104_c0_g4_i1	Phosphomannomutase	GO:0005737;GO:0004615;GO:0009298	GDP-mannose biosynthetic process [GO:0009298]	phosphomannomutase activity [GO:0004615]	cytoplasm [GO:0005737]
		TRINITY_DN30104_c1_g1_i1	Phosphomannomutase	GO:0005737;GO:0004615;GO:0009298	GDP-mannose biosynthetic process [GO:0009298]	phosphomannomutase activity [GO:0004615]	cytoplasm [GO:0005737]
		TRINITY_DN30104_c2_g1_i1	Phosphomannomutase	GO:0005737;GO:0004615;GO:0009298	GDP-mannose biosynthetic process [GO:0009298]	phosphomannomutase activity [GO:0004615]	cytoplasm [GO:0005737]
		TRINITY_DN30110_c0_g1_i2	Uncharacterized protein
		TRINITY_DN30121_c0_g1_i3	Uncharacterized protein	GO:0005622;GO:0046872;GO:0008080;GO:0035556	intracellular signal transduction [GO:0035556]	metal ion binding [GO:0046872];N-acetyltransferase activity [GO:0008080]	intracellular [GO:0005622]
		TRINITY_DN30121_c0_g1_i6	Uncharacterized protein	GO:0005622;GO:0046872;GO:0008080;GO:0035556	intracellular signal transduction [GO:0035556]	metal ion binding [GO:0046872];N-acetyltransferase activity [GO:0008080]	intracellular [GO:0005622]
		TRINITY_DN30121_c0_g1_i7	Uncharacterized protein	GO:0005622;GO:0046872;GO:0008080;GO:0035556	intracellular signal transduction [GO:0035556]	metal ion binding [GO:0046872];N-acetyltransferase activity [GO:0008080]	intracellular [GO:0005622]
		TRINITY_DN30121_c0_g1_i4	Uncharacterized protein	GO:0005622;GO:0046872;GO:0008080;GO:0035556	intracellular signal transduction [GO:0035556]	metal ion binding [GO:0046872];N-acetyltransferase activity [GO:0008080]	intracellular [GO:0005622]
		TRINITY_DN30121_c0_g1_i8	Uncharacterized protein	GO:0005622;GO:0046872;GO:0008080;GO:0035556	intracellular signal transduction [GO:0035556]	metal ion binding [GO:0046872];N-acetyltransferase activity [GO:0008080]	intracellular [GO:0005622]
		TRINITY_DN30187_c0_g1_i2	Uncharacterized protein	GO:0046872;GO:0030001	metal ion transport [GO:0030001]	metal ion binding [GO:0046872]
		TRINITY_DN30187_c0_g1_i4	Uncharacterized protein	GO:0046872;GO:0030001	metal ion transport [GO:0030001]	metal ion binding [GO:0046872]
		TRINITY_DN30187_c0_g1_i1	Uncharacterized protein	GO:0046872;GO:0030001	metal ion transport [GO:0030001]	metal ion binding [GO:0046872]
		TRINITY_DN30187_c0_g1_i3	Uncharacterized protein	GO:0046872;GO:0030001	metal ion transport [GO:0030001]	metal ion binding [GO:0046872]
		TRINITY_DN30187_c0_g2_i1	Uncharacterized protein	GO:0046872;GO:0030001	metal ion transport [GO:0030001]	metal ion binding [GO:0046872]
		TRINITY_DN30197_c0_g1_i2	F-box only protein 7
		TRINITY_DN30197_c0_g1_i1	Uncharacterized protein
		TRINITY_DN30197_c0_g1_i4	F-box only protein 7
		TRINITY_DN30197_c0_g1_i6	Uncharacterized protein
		TRINITY_DN30197_c0_g1_i3	F-box only protein 7
		TRINITY_DN30197_c0_g1_i5	Uncharacterized protein
		TRINITY_DN30153_c0_g1_i5	Os06g0259000 protein	GO:0005524;GO:0016307		ATP binding [GO:0005524];phosphatidylinositol phosphate kinase activity [GO:0016307]
		TRINITY_DN30153_c0_g1_i11	Os06g0259000 protein	GO:0005524;GO:0016307		ATP binding [GO:0005524];phosphatidylinositol phosphate kinase activity [GO:0016307]
		TRINITY_DN30153_c0_g1_i9	Os06g0259000 protein	GO:0005524;GO:0016307		ATP binding [GO:0005524];phosphatidylinositol phosphate kinase activity [GO:0016307]
		TRINITY_DN30153_c0_g1_i6	Os06g0259000 protein	GO:0005524;GO:0016307		ATP binding [GO:0005524];phosphatidylinositol phosphate kinase activity [GO:0016307]
		TRINITY_DN30153_c0_g1_i3	Os06g0259000 protein	GO:0005524;GO:0016307		ATP binding [GO:0005524];phosphatidylinositol phosphate kinase activity [GO:0016307]
		TRINITY_DN30153_c0_g1_i4	Os06g0259000 protein	GO:0005524;GO:0016307		ATP binding [GO:0005524];phosphatidylinositol phosphate kinase activity [GO:0016307]
		TRINITY_DN30142_c0_g1_i4	Uncharacterized protein
		TRINITY_DN30142_c0_g1_i5	Uncharacterized protein
		TRINITY_DN30142_c0_g1_i2	Uncharacterized protein
		TRINITY_DN30142_c0_g2_i1	Uncharacterized protein
		TRINITY_DN30156_c0_g1_i1	Uncharacterized protein	GO:0016021			integral component of membrane [GO:0016021]
		TRINITY_DN30156_c0_g1_i7	Uncharacterized protein	GO:0016021			integral component of membrane [GO:0016021]
		TRINITY_DN30156_c0_g1_i9	Uncharacterized protein	GO:0016021			integral component of membrane [GO:0016021]
		TRINITY_DN30156_c0_g1_i5	Uncharacterized protein	GO:0016021			integral component of membrane [GO:0016021]
		TRINITY_DN30156_c0_g1_i8	Uncharacterized protein	GO:0016021			integral component of membrane [GO:0016021]
		TRINITY_DN30175_c0_g1_i1	Uncharacterized protein	GO:0008270;GO:0006355	regulation of transcription, DNA-templated [GO:0006355]	zinc ion binding [GO:0008270]
		TRINITY_DN30175_c0_g1_i2	Uncharacterized protein	GO:0006355	regulation of transcription, DNA-templated [GO:0006355]
		TRINITY_DN30191_c0_g1_i1	Uncharacterized protein
		TRINITY_DN30131_c0_g1_i5	Uncharacterized protein	GO:0016491		oxidoreductase activity [GO:0016491]
		TRINITY_DN30131_c0_g1_i4	Predicted protein	GO:0016491		oxidoreductase activity [GO:0016491]
		TRINITY_DN30131_c0_g1_i8	Uncharacterized protein	GO:0016491		oxidoreductase activity [GO:0016491]
		TRINITY_DN30131_c0_g1_i7	Uncharacterized protein	GO:0016491		oxidoreductase activity [GO:0016491]
		TRINITY_DN30131_c0_g1_i11	Uncharacterized protein	GO:0016491		oxidoreductase activity [GO:0016491]
		TRINITY_DN30131_c0_g1_i12	Uncharacterized protein	GO:0016491		oxidoreductase activity [GO:0016491]
		TRINITY_DN30131_c0_g1_i2	Uncharacterized protein	GO:0016491		oxidoreductase activity [GO:0016491]
		TRINITY_DN30131_c0_g1_i6	Uncharacterized protein	GO:0016491		oxidoreductase activity [GO:0016491]
		TRINITY_DN30131_c0_g1_i1	Uncharacterized protein	GO:0016491		oxidoreductase activity [GO:0016491]
		TRINITY_DN30131_c0_g1_i10	Uncharacterized protein	GO:0016491		oxidoreductase activity [GO:0016491]
		TRINITY_DN30131_c0_g2_i1	Uncharacterized protein	GO:0016491		oxidoreductase activity [GO:0016491]
		TRINITY_DN30131_c0_g3_i1	Uncharacterized protein	GO:0016491		oxidoreductase activity [GO:0016491]
		TRINITY_DN30102_c0_g1_i1	Uncharacterized protein	GO:0043531		ADP binding [GO:0043531]
		TRINITY_DN30102_c0_g1_i2	Disease resistance protein RPP13	GO:0043531		ADP binding [GO:0043531]
		TRINITY_DN30102_c0_g2_i1	Uncharacterized protein	GO:0043531		ADP binding [GO:0043531]
		TRINITY_DN30102_c0_g3_i1	Disease resistance protein RPM1	GO:0043531		ADP binding [GO:0043531]
		TRINITY_DN30193_c0_g1_i6	Uncharacterized protein
		TRINITY_DN30193_c0_g1_i1	Uncharacterized protein
		TRINITY_DN30193_c0_g1_i8	Uncharacterized protein
		TRINITY_DN30193_c0_g1_i2	Uncharacterized protein
		TRINITY_DN30193_c0_g1_i14	Uncharacterized protein
		TRINITY_DN30193_c0_g1_i13	Uncharacterized protein
		TRINITY_DN30193_c0_g1_i10	Uncharacterized protein
		TRINITY_DN30193_c0_g1_i3	Uncharacterized protein
		TRINITY_DN30108_c0_g1_i1	Uncharacterized protein	GO:0003676		nucleic acid binding [GO:0003676]
		TRINITY_DN30192_c0_g1_i2	Cysteine-rich receptor-like protein kinase 26	GO:0000145;GO:0005524;GO:0004672;GO:0006887	exocytosis [GO:0006887]	ATP binding [GO:0005524];protein kinase activity [GO:0004672]	exocyst [GO:0000145]
		TRINITY_DN30150_c0_g1_i2	Uncharacterized protein	GO:0016021			integral component of membrane [GO:0016021]
		TRINITY_DN30150_c0_g1_i1	Uncharacterized protein	GO:0016021			integral component of membrane [GO:0016021]
		TRINITY_DN30150_c0_g2_i1	Proton-coupled amino acid transporter 3	GO:0016021			integral component of membrane [GO:0016021]
		TRINITY_DN30150_c1_g1_i1	Uncharacterized protein	GO:0016021			integral component of membrane [GO:0016021]
		TRINITY_DN30120_c0_g1_i1	Uncharacterized protein
		TRINITY_DN30168_c0_g1_i2	BRCA1-associated protein	GO:0000151;GO:0046982;GO:0004842;GO:0008270;GO:0010029	regulation of seed germination [GO:0010029]	protein heterodimerization activity [GO:0046982];ubiquitin-protein transferase activity [GO:0004842];zinc ion binding [GO:0008270]	ubiquitin ligase complex [GO:0000151]
		TRINITY_DN30168_c0_g1_i1	Predicted protein	GO:0000151;GO:0003676;GO:0046982;GO:0004842;GO:0008270;GO:0010029	regulation of seed germination [GO:0010029]	nucleic acid binding [GO:0003676];protein heterodimerization activity [GO:0046982];ubiquitin-protein transferase activity [GO:0004842];zinc ion binding [GO:0008270]	ubiquitin ligase complex [GO:0000151]
		TRINITY_DN30168_c0_g1_i3	Uncharacterized protein	GO:0000151;GO:0046982;GO:0004842;GO:0008270;GO:0010029	regulation of seed germination [GO:0010029]	protein heterodimerization activity [GO:0046982];ubiquitin-protein transferase activity [GO:0004842];zinc ion binding [GO:0008270]	ubiquitin ligase complex [GO:0000151]
		TRINITY_DN30134_c0_g1_i2	Uncharacterized protein
		TRINITY_DN30134_c0_g1_i1	Uncharacterized protein
		TRINITY_DN30125_c0_g1_i1	Uncharacterized protein
		TRINITY_DN30125_c0_g1_i2	Uncharacterized protein
		TRINITY_DN30125_c0_g1_i3	Uncharacterized protein
		TRINITY_DN30125_c0_g1_i4	Uncharacterized protein
		TRINITY_DN30125_c0_g2_i1	Uncharacterized protein
		TRINITY_DN30125_c0_g3_i2	Uncharacterized protein
		TRINITY_DN30125_c0_g3_i1	Uncharacterized protein
		TRINITY_DN30125_c0_g4_i3	Uncharacterized protein
		TRINITY_DN30125_c0_g4_i2	Uncharacterized protein
		TRINITY_DN30194_c0_g1_i2	Uncharacterized protein	GO:0043531		ADP binding [GO:0043531]
		TRINITY_DN30194_c0_g1_i3	Uncharacterized protein	GO:0043531		ADP binding [GO:0043531]
		TRINITY_DN30149_c0_g1_i11	Uncharacterized protein	GO:0016021;GO:0004575;GO:0005975	carbohydrate metabolic process [GO:0005975]	sucrose alpha-glucosidase activity [GO:0004575]	integral component of membrane [GO:0016021]
		TRINITY_DN30149_c0_g1_i4	Uncharacterized protein	GO:0016021;GO:0004575;GO:0005975	carbohydrate metabolic process [GO:0005975]	sucrose alpha-glucosidase activity [GO:0004575]	integral component of membrane [GO:0016021]
		TRINITY_DN30149_c0_g1_i9	Uncharacterized protein	GO:0016021;GO:0004575;GO:0005975	carbohydrate metabolic process [GO:0005975]	sucrose alpha-glucosidase activity [GO:0004575]	integral component of membrane [GO:0016021]
		TRINITY_DN30149_c0_g1_i8	Uncharacterized protein	GO:0016021;GO:0004575;GO:0005975	carbohydrate metabolic process [GO:0005975]	sucrose alpha-glucosidase activity [GO:0004575]	integral component of membrane [GO:0016021]
		TRINITY_DN30149_c0_g1_i13	Uncharacterized protein	GO:0016021;GO:0004575;GO:0005975	carbohydrate metabolic process [GO:0005975]	sucrose alpha-glucosidase activity [GO:0004575]	integral component of membrane [GO:0016021]
		TRINITY_DN30149_c0_g1_i5	Uncharacterized protein	GO:0016021;GO:0004575;GO:0005975	carbohydrate metabolic process [GO:0005975]	sucrose alpha-glucosidase activity [GO:0004575]	integral component of membrane [GO:0016021]
		TRINITY_DN30149_c0_g1_i6	Uncharacterized protein	GO:0016021;GO:0004575;GO:0005975	carbohydrate metabolic process [GO:0005975]	sucrose alpha-glucosidase activity [GO:0004575]	integral component of membrane [GO:0016021]
		TRINITY_DN30149_c0_g1_i7	Uncharacterized protein	GO:0016021;GO:0004575;GO:0005975	carbohydrate metabolic process [GO:0005975]	sucrose alpha-glucosidase activity [GO:0004575]	integral component of membrane [GO:0016021]
		TRINITY_DN30149_c0_g2_i1	Uncharacterized protein	GO:0016021;GO:0004575;GO:0005975	carbohydrate metabolic process [GO:0005975]	sucrose alpha-glucosidase activity [GO:0004575]	integral component of membrane [GO:0016021]
		TRINITY_DN30183_c0_g1_i1	Uncharacterized protein	GO:0005524		ATP binding [GO:0005524]
		TRINITY_DN30183_c0_g1_i2	Putative ATP-dependent helicase	GO:0005524;GO:0004386		ATP binding [GO:0005524];helicase activity [GO:0004386]
		TRINITY_DN30178_c0_g1_i1	Uncharacterized protein	GO:0009733	response to auxin [GO:0009733]
		TRINITY_DN30174_c0_g1_i1	Uncharacterized protein	GO:0016788		hydrolase activity, acting on ester bonds [GO:0016788]
		TRINITY_DN30174_c0_g2_i5	Uncharacterized protein	GO:0009941;GO:0016788		hydrolase activity, acting on ester bonds [GO:0016788]	chloroplast envelope [GO:0009941]
		TRINITY_DN30174_c0_g2_i6	Uncharacterized protein	GO:0009941;GO:0016788		hydrolase activity, acting on ester bonds [GO:0016788]	chloroplast envelope [GO:0009941]
		TRINITY_DN30174_c0_g2_i1	Uncharacterized protein	GO:0009941;GO:0016788		hydrolase activity, acting on ester bonds [GO:0016788]	chloroplast envelope [GO:0009941]
		TRINITY_DN30174_c0_g2_i2	Uncharacterized protein	GO:0009941;GO:0016788		hydrolase activity, acting on ester bonds [GO:0016788]	chloroplast envelope [GO:0009941]
		TRINITY_DN30174_c0_g2_i3	Uncharacterized protein	GO:0009941;GO:0016788		hydrolase activity, acting on ester bonds [GO:0016788]	chloroplast envelope [GO:0009941]
		TRINITY_DN30174_c1_g1_i1	Uncharacterized protein
		TRINITY_DN30174_c1_g1_i4	Uncharacterized protein	GO:0016021;GO:0009579			integral component of membrane [GO:0016021];thylakoid [GO:0009579]
		TRINITY_DN30174_c1_g1_i3	Separin	GO:0005634;GO:0008233		peptidase activity [GO:0008233]	nucleus [GO:0005634]
		TRINITY_DN30174_c1_g1_i7	Uncharacterized protein
		TRINITY_DN30174_c1_g1_i5	Separin	GO:0005634;GO:0008233		peptidase activity [GO:0008233]	nucleus [GO:0005634]
		TRINITY_DN30128_c0_g1_i6	Flavonoid 3',5'-hydroxylase 1	GO:0020037;GO:0005506;GO:0004497;GO:0016705		heme binding [GO:0020037];iron ion binding [GO:0005506];monooxygenase activity [GO:0004497];oxidoreductase activity, acting on paired donors, with incorporation or reduction of molecular oxygen [GO:0016705]
		TRINITY_DN30128_c0_g1_i5	Uncharacterized protein	GO:0016021;GO:0020037;GO:0005506;GO:0004497;GO:0016705		heme binding [GO:0020037];iron ion binding [GO:0005506];monooxygenase activity [GO:0004497];oxidoreductase activity, acting on paired donors, with incorporation or reduction of molecular oxygen [GO:0016705]	integral component of membrane [GO:0016021]
		TRINITY_DN30128_c0_g1_i2	Flavonoid 3',5'-hydroxylase 1	GO:0020037;GO:0005506;GO:0004497;GO:0016705		heme binding [GO:0020037];iron ion binding [GO:0005506];monooxygenase activity [GO:0004497];oxidoreductase activity, acting on paired donors, with incorporation or reduction of molecular oxygen [GO:0016705]
		TRINITY_DN30128_c0_g1_i1	Flavonoid 3',5'-hydroxylase 1	GO:0020037;GO:0005506;GO:0004497;GO:0016705		heme binding [GO:0020037];iron ion binding [GO:0005506];monooxygenase activity [GO:0004497];oxidoreductase activity, acting on paired donors, with incorporation or reduction of molecular oxygen [GO:0016705]
		TRINITY_DN30128_c0_g1_i4	Flavonoid 3',5'-hydroxylase 1	GO:0020037;GO:0005506;GO:0004497;GO:0016705		heme binding [GO:0020037];iron ion binding [GO:0005506];monooxygenase activity [GO:0004497];oxidoreductase activity, acting on paired donors, with incorporation or reduction of molecular oxygen [GO:0016705]
		TRINITY_DN30128_c0_g2_i1	Flavonoid 3'-monooxygenase	GO:0020037;GO:0005506;GO:0004497;GO:0016705		heme binding [GO:0020037];iron ion binding [GO:0005506];monooxygenase activity [GO:0004497];oxidoreductase activity, acting on paired donors, with incorporation or reduction of molecular oxygen [GO:0016705]
		TRINITY_DN30114_c0_g1_i1	Uncharacterized protein	GO:0004553;GO:0005975	carbohydrate metabolic process [GO:0005975]	hydrolase activity, hydrolyzing O-glycosyl compounds [GO:0004553]
		TRINITY_DN30114_c0_g1_i3	Uncharacterized protein	GO:0004553;GO:0005975	carbohydrate metabolic process [GO:0005975]	hydrolase activity, hydrolyzing O-glycosyl compounds [GO:0004553]
		TRINITY_DN30114_c0_g1_i2	Uncharacterized protein	GO:0004553;GO:0005975	carbohydrate metabolic process [GO:0005975]	hydrolase activity, hydrolyzing O-glycosyl compounds [GO:0004553]
		TRINITY_DN30161_c0_g2_i2	Uncharacterized protein	GO:0016021;GO:0005524;GO:0004672		ATP binding [GO:0005524];protein kinase activity [GO:0004672]	integral component of membrane [GO:0016021]
		TRINITY_DN30137_c0_g1_i2	Xyloglucan endotransglucosylase/hydrolase	GO:0048046;GO:0005618;GO:0004553;GO:0016762;GO:0042546;GO:0071555;GO:0010411	cell wall biogenesis [GO:0042546];cell wall organization [GO:0071555];xyloglucan metabolic process [GO:0010411]	hydrolase activity, hydrolyzing O-glycosyl compounds [GO:0004553];xyloglucan [GO:0016762]	apoplast [GO:0048046];cell wall [GO:0005618]
		TRINITY_DN30137_c0_g1_i3	Xyloglucan endotransglucosylase/hydrolase	GO:0048046;GO:0005618;GO:0004553;GO:0016762;GO:0042546;GO:0071555;GO:0010411	cell wall biogenesis [GO:0042546];cell wall organization [GO:0071555];xyloglucan metabolic process [GO:0010411]	hydrolase activity, hydrolyzing O-glycosyl compounds [GO:0004553];xyloglucan [GO:0016762]	apoplast [GO:0048046];cell wall [GO:0005618]
		TRINITY_DN30137_c0_g1_i1	Xyloglucan endotransglucosylase/hydrolase	GO:0048046;GO:0005618;GO:0004553;GO:0016762;GO:0042546;GO:0071555;GO:0010411	cell wall biogenesis [GO:0042546];cell wall organization [GO:0071555];xyloglucan metabolic process [GO:0010411]	hydrolase activity, hydrolyzing O-glycosyl compounds [GO:0004553];xyloglucan [GO:0016762]	apoplast [GO:0048046];cell wall [GO:0005618]
		TRINITY_DN144_c0_g1_i10	Aldehyde dehydrogenase	GO:0004030;GO:0006081	cellular aldehyde metabolic process [GO:0006081]	aldehyde dehydrogenase [NAD(P)+] activity [GO:0004030]
		TRINITY_DN144_c0_g1_i7	Aldehyde dehydrogenase	GO:0004030;GO:0006081	cellular aldehyde metabolic process [GO:0006081]	aldehyde dehydrogenase [NAD(P)+] activity [GO:0004030]
		TRINITY_DN144_c0_g1_i8	Aldehyde dehydrogenase	GO:0004030;GO:0006081	cellular aldehyde metabolic process [GO:0006081]	aldehyde dehydrogenase [NAD(P)+] activity [GO:0004030]
		TRINITY_DN144_c0_g1_i1	Aldehyde dehydrogenase	GO:0004030;GO:0006081	cellular aldehyde metabolic process [GO:0006081]	aldehyde dehydrogenase [NAD(P)+] activity [GO:0004030]
		TRINITY_DN144_c0_g1_i6	Aldehyde dehydrogenase	GO:0004030;GO:0006081	cellular aldehyde metabolic process [GO:0006081]	aldehyde dehydrogenase [NAD(P)+] activity [GO:0004030]
		TRINITY_DN144_c0_g1_i5	Aldehyde dehydrogenase	GO:0004030;GO:0006081	cellular aldehyde metabolic process [GO:0006081]	aldehyde dehydrogenase [NAD(P)+] activity [GO:0004030]
		TRINITY_DN144_c0_g1_i2	Aldehyde dehydrogenase	GO:0004030;GO:0006081	cellular aldehyde metabolic process [GO:0006081]	aldehyde dehydrogenase [NAD(P)+] activity [GO:0004030]
		TRINITY_DN144_c0_g1_i3	Aldehyde dehydrogenase	GO:0004030;GO:0006081	cellular aldehyde metabolic process [GO:0006081]	aldehyde dehydrogenase [NAD(P)+] activity [GO:0004030]
		TRINITY_DN144_c0_g1_i4	Aldehyde dehydrogenase	GO:0004030;GO:0006081	cellular aldehyde metabolic process [GO:0006081]	aldehyde dehydrogenase [NAD(P)+] activity [GO:0004030]
		TRINITY_DN144_c0_g1_i12	Aldehyde dehydrogenase	GO:0004030;GO:0006081	cellular aldehyde metabolic process [GO:0006081]	aldehyde dehydrogenase [NAD(P)+] activity [GO:0004030]
		TRINITY_DN144_c0_g1_i11	Aldehyde dehydrogenase	GO:0004030;GO:0006081	cellular aldehyde metabolic process [GO:0006081]	aldehyde dehydrogenase [NAD(P)+] activity [GO:0004030]
		TRINITY_DN144_c0_g1_i13	Aldehyde dehydrogenase	GO:0004030;GO:0006081	cellular aldehyde metabolic process [GO:0006081]	aldehyde dehydrogenase [NAD(P)+] activity [GO:0004030]
		TRINITY_DN144_c0_g2_i1	Aldehyde dehydrogenase	GO:0004030;GO:0006081	cellular aldehyde metabolic process [GO:0006081]	aldehyde dehydrogenase [NAD(P)+] activity [GO:0004030]
		TRINITY_DN179_c0_g1_i12	Uncharacterized protein	GO:0005622;GO:0005525;GO:0006614	SRP-dependent cotranslational protein targeting to membrane [GO:0006614]	GTP binding [GO:0005525]	intracellular [GO:0005622]
		TRINITY_DN179_c0_g1_i5	Uncharacterized protein
		TRINITY_DN179_c0_g1_i7	Uncharacterized protein
		TRINITY_DN179_c0_g1_i10	Uncharacterized protein
		TRINITY_DN179_c0_g1_i8	Uncharacterized protein
		TRINITY_DN179_c0_g1_i15	Uncharacterized protein	GO:0005622;GO:0005525;GO:0006614	SRP-dependent cotranslational protein targeting to membrane [GO:0006614]	GTP binding [GO:0005525]	intracellular [GO:0005622]
		TRINITY_DN179_c0_g1_i17	Uncharacterized protein
		TRINITY_DN179_c0_g1_i6	Uncharacterized protein
		TRINITY_DN179_c0_g1_i4	Uncharacterized protein	GO:0005622;GO:0005525;GO:0006614	SRP-dependent cotranslational protein targeting to membrane [GO:0006614]	GTP binding [GO:0005525]	intracellular [GO:0005622]
		TRINITY_DN179_c0_g1_i1	Uncharacterized protein	GO:0005622;GO:0005525;GO:0006614	SRP-dependent cotranslational protein targeting to membrane [GO:0006614]	GTP binding [GO:0005525]	intracellular [GO:0005622]
		TRINITY_DN179_c0_g1_i11	Uncharacterized protein	GO:0005622;GO:0005525;GO:0006614	SRP-dependent cotranslational protein targeting to membrane [GO:0006614]	GTP binding [GO:0005525]	intracellular [GO:0005622]
		TRINITY_DN179_c0_g1_i3	Uncharacterized protein
		TRINITY_DN179_c0_g1_i14	Uncharacterized protein
		TRINITY_DN179_c0_g1_i16	Uncharacterized protein
		TRINITY_DN179_c0_g1_i2	Uncharacterized protein
		TRINITY_DN179_c1_g1_i1	Uncharacterized protein
		TRINITY_DN179_c1_g1_i3	Uncharacterized protein
		TRINITY_DN179_c1_g1_i2	Uncharacterized protein
		TRINITY_DN179_c3_g1_i3	Uncharacterized protein
		TRINITY_DN159_c0_g1_i3	HVA22-like protein	GO:0016020			membrane [GO:0016020]
		TRINITY_DN159_c0_g1_i1	HVA22-like protein	GO:0016020			membrane [GO:0016020]
		TRINITY_DN159_c0_g1_i6	HVA22-like protein	GO:0016020			membrane [GO:0016020]
		TRINITY_DN159_c0_g1_i2	HVA22-like protein	GO:0016020			membrane [GO:0016020]
		TRINITY_DN159_c0_g1_i8	HVA22-like protein	GO:0016020			membrane [GO:0016020]
		TRINITY_DN159_c0_g1_i4	HVA22-like protein	GO:0016020			membrane [GO:0016020]
		TRINITY_DN159_c0_g1_i9	HVA22-like protein	GO:0016020			membrane [GO:0016020]
		TRINITY_DN159_c0_g1_i5	HVA22-like protein	GO:0016020			membrane [GO:0016020]
		TRINITY_DN159_c0_g1_i7	HVA22-like protein	GO:0016020			membrane [GO:0016020]
		TRINITY_DN153_c0_g1_i9	Uncharacterized protein
		TRINITY_DN153_c0_g1_i12	Uncharacterized protein
		TRINITY_DN153_c0_g1_i4	Uncharacterized protein
		TRINITY_DN153_c0_g1_i3	Uncharacterized protein
		TRINITY_DN153_c0_g1_i5	Uncharacterized protein
		TRINITY_DN153_c0_g1_i11	Uncharacterized protein	GO:0003676		nucleic acid binding [GO:0003676]
		TRINITY_DN153_c0_g1_i20	Uncharacterized protein
		TRINITY_DN153_c0_g1_i6	Uncharacterized protein
		TRINITY_DN153_c0_g1_i13	G-type lectin S-receptor-like serine/threonine-protein kinase SD1-29	GO:0005524;GO:0030246;GO:0004672		ATP binding [GO:0005524];carbohydrate binding [GO:0030246];protein kinase activity [GO:0004672]
		TRINITY_DN153_c0_g1_i1	Uncharacterized protein
		TRINITY_DN153_c0_g1_i8	Uncharacterized protein
		TRINITY_DN153_c0_g1_i7	Uncharacterized protein
		TRINITY_DN153_c0_g1_i21	Uncharacterized protein
		TRINITY_DN153_c0_g2_i1	Uncharacterized protein	GO:0003676		nucleic acid binding [GO:0003676]
		TRINITY_DN130_c0_g1_i1	Uncharacterized protein	GO:0005524		ATP binding [GO:0005524]
		TRINITY_DN130_c0_g1_i4	Uncharacterized protein	GO:0005524		ATP binding [GO:0005524]
		TRINITY_DN130_c0_g1_i3	Uncharacterized protein	GO:0005524		ATP binding [GO:0005524]
		TRINITY_DN130_c0_g2_i1	Uncharacterized protein	GO:0005524		ATP binding [GO:0005524]
		TRINITY_DN106_c0_g1_i1	Uncharacterized protein	GO:0005622;GO:0008270		zinc ion binding [GO:0008270]	intracellular [GO:0005622]
		TRINITY_DN106_c0_g1_i4	Uncharacterized protein	GO:0005622;GO:0008270		zinc ion binding [GO:0008270]	intracellular [GO:0005622]
		TRINITY_DN106_c0_g1_i3	Uncharacterized protein	GO:0005622;GO:0008270		zinc ion binding [GO:0008270]	intracellular [GO:0005622]
		TRINITY_DN106_c0_g1_i2	Uncharacterized protein	GO:0005622;GO:0008270		zinc ion binding [GO:0008270]	intracellular [GO:0005622]
		TRINITY_DN106_c0_g1_i5	Uncharacterized protein	GO:0005622;GO:0008270		zinc ion binding [GO:0008270]	intracellular [GO:0005622]
		TRINITY_DN154_c0_g1_i2	F-box domain containing protein,putative,expressed
		TRINITY_DN154_c0_g1_i6	F-box domain containing protein,putative,expressed
		TRINITY_DN154_c0_g1_i10	F-box domain containing protein,putative,expressed
		TRINITY_DN154_c0_g1_i5	F-box domain containing protein,putative,expressed
		TRINITY_DN194_c0_g1_i1	Uncharacterized protein	GO:0016021;GO:0005524;GO:0004672		ATP binding [GO:0005524];protein kinase activity [GO:0004672]	integral component of membrane [GO:0016021]
		TRINITY_DN194_c0_g1_i3	Uncharacterized protein	GO:0016021;GO:0005524;GO:0004672		ATP binding [GO:0005524];protein kinase activity [GO:0004672]	integral component of membrane [GO:0016021]
		TRINITY_DN194_c0_g1_i2	Uncharacterized protein	GO:0016021;GO:0005524;GO:0004672		ATP binding [GO:0005524];protein kinase activity [GO:0004672]	integral component of membrane [GO:0016021]
		TRINITY_DN194_c0_g2_i1	Uncharacterized protein	GO:0016021;GO:0005524;GO:0004672		ATP binding [GO:0005524];protein kinase activity [GO:0004672]	integral component of membrane [GO:0016021]
		TRINITY_DN177_c0_g1_i4	Uncharacterized protein
		TRINITY_DN177_c0_g1_i5	Uncharacterized protein
		TRINITY_DN177_c0_g1_i1	Uncharacterized protein	GO:0005886			plasma membrane [GO:0005886]
		TRINITY_DN177_c0_g1_i6	Uncharacterized protein	GO:0005886			plasma membrane [GO:0005886]
		TRINITY_DN177_c0_g1_i3	Uncharacterized protein
		TRINITY_DN177_c0_g1_i2	Uncharacterized protein
		TRINITY_DN177_c1_g1_i4	Uncharacterized protein
		TRINITY_DN177_c1_g1_i6	Uncharacterized protein
		TRINITY_DN177_c1_g1_i2	Uncharacterized protein
		TRINITY_DN177_c1_g1_i3	Uncharacterized protein
		TRINITY_DN177_c1_g1_i1	Uncharacterized protein
		TRINITY_DN177_c1_g2_i1	Uncharacterized protein
		TRINITY_DN184_c0_g1_i8	Uncharacterized protein	GO:0005086;GO:0032012	regulation of ARF protein signal transduction [GO:0032012]	ARF guanyl-nucleotide exchange factor activity [GO:0005086]
		TRINITY_DN184_c0_g1_i6	Uncharacterized protein	GO:0016021			integral component of membrane [GO:0016021]
		TRINITY_DN184_c0_g1_i5	Uncharacterized protein	GO:0005086;GO:0032012	regulation of ARF protein signal transduction [GO:0032012]	ARF guanyl-nucleotide exchange factor activity [GO:0005086]
		TRINITY_DN184_c0_g1_i4	Uncharacterized protein	GO:0005086;GO:0032012	regulation of ARF protein signal transduction [GO:0032012]	ARF guanyl-nucleotide exchange factor activity [GO:0005086]
		TRINITY_DN184_c0_g1_i2	Uncharacterized protein	GO:0016021			integral component of membrane [GO:0016021]
		TRINITY_DN184_c0_g1_i3	Uncharacterized protein	GO:0005086;GO:0032012	regulation of ARF protein signal transduction [GO:0032012]	ARF guanyl-nucleotide exchange factor activity [GO:0005086]
		TRINITY_DN184_c0_g2_i1	Uncharacterized protein
		TRINITY_DN184_c2_g1_i1	Uncharacterized protein
		TRINITY_DN184_c2_g1_i3	Uncharacterized protein
		TRINITY_DN167_c0_g1_i5	Uncharacterized protein	GO:0020037;GO:0005506;GO:0004497;GO:0016705		heme binding [GO:0020037];iron ion binding [GO:0005506];monooxygenase activity [GO:0004497];oxidoreductase activity, acting on paired donors, with incorporation or reduction of molecular oxygen [GO:0016705]
		TRINITY_DN167_c0_g1_i1	Cytochrome P450 76C4	GO:0020037;GO:0005506;GO:0004497;GO:0016705		heme binding [GO:0020037];iron ion binding [GO:0005506];monooxygenase activity [GO:0004497];oxidoreductase activity, acting on paired donors, with incorporation or reduction of molecular oxygen [GO:0016705]
		TRINITY_DN167_c0_g1_i6	Uncharacterized protein	GO:0020037;GO:0005506;GO:0004497;GO:0016705		heme binding [GO:0020037];iron ion binding [GO:0005506];monooxygenase activity [GO:0004497];oxidoreductase activity, acting on paired donors, with incorporation or reduction of molecular oxygen [GO:0016705]
		TRINITY_DN167_c0_g1_i8	Cytochrome P450 76C4	GO:0020037;GO:0005506;GO:0004497;GO:0016705		heme binding [GO:0020037];iron ion binding [GO:0005506];monooxygenase activity [GO:0004497];oxidoreductase activity, acting on paired donors, with incorporation or reduction of molecular oxygen [GO:0016705]
		TRINITY_DN167_c0_g1_i2	Uncharacterized protein	GO:0020037;GO:0005506;GO:0004497;GO:0016705		heme binding [GO:0020037];iron ion binding [GO:0005506];monooxygenase activity [GO:0004497];oxidoreductase activity, acting on paired donors, with incorporation or reduction of molecular oxygen [GO:0016705]
		TRINITY_DN167_c0_g1_i4	Uncharacterized protein	GO:0020037;GO:0005506;GO:0004497;GO:0016705		heme binding [GO:0020037];iron ion binding [GO:0005506];monooxygenase activity [GO:0004497];oxidoreductase activity, acting on paired donors, with incorporation or reduction of molecular oxygen [GO:0016705]
		TRINITY_DN151_c0_g1_i2	Uncharacterized protein	GO:0003987;GO:0016208;GO:0019427	acetyl-CoA biosynthetic process from acetate [GO:0019427]	acetate-CoA ligase activity [GO:0003987];AMP binding [GO:0016208]
		TRINITY_DN151_c0_g1_i1	Uncharacterized protein	GO:0003987;GO:0016208;GO:0019427	acetyl-CoA biosynthetic process from acetate [GO:0019427]	acetate-CoA ligase activity [GO:0003987];AMP binding [GO:0016208]
		TRINITY_DN151_c0_g1_i3	Uncharacterized protein	GO:0003987;GO:0016208;GO:0019427	acetyl-CoA biosynthetic process from acetate [GO:0019427]	acetate-CoA ligase activity [GO:0003987];AMP binding [GO:0016208]
		TRINITY_DN193_c0_g1_i7	Derlin	GO:0005789;GO:0016021			endoplasmic reticulum membrane [GO:0005789];integral component of membrane [GO:0016021]
		TRINITY_DN193_c0_g1_i6	Derlin	GO:0005789;GO:0016021			endoplasmic reticulum membrane [GO:0005789];integral component of membrane [GO:0016021]
		TRINITY_DN193_c0_g1_i11	Derlin	GO:0005789;GO:0016021			endoplasmic reticulum membrane [GO:0005789];integral component of membrane [GO:0016021]
		TRINITY_DN193_c0_g1_i9	Derlin	GO:0005789;GO:0016021			endoplasmic reticulum membrane [GO:0005789];integral component of membrane [GO:0016021]
		TRINITY_DN193_c0_g1_i4	Derlin	GO:0005789;GO:0016021			endoplasmic reticulum membrane [GO:0005789];integral component of membrane [GO:0016021]
		TRINITY_DN193_c0_g1_i2	Derlin	GO:0005789;GO:0016021			endoplasmic reticulum membrane [GO:0005789];integral component of membrane [GO:0016021]
		TRINITY_DN193_c0_g1_i12	Derlin	GO:0005789;GO:0016021			endoplasmic reticulum membrane [GO:0005789];integral component of membrane [GO:0016021]
		TRINITY_DN193_c0_g1_i5	Derlin	GO:0005789;GO:0016021			endoplasmic reticulum membrane [GO:0005789];integral component of membrane [GO:0016021]
		TRINITY_DN193_c0_g1_i1	Derlin	GO:0005789;GO:0016021			endoplasmic reticulum membrane [GO:0005789];integral component of membrane [GO:0016021]
		TRINITY_DN193_c0_g1_i10	Derlin	GO:0005789;GO:0016021			endoplasmic reticulum membrane [GO:0005789];integral component of membrane [GO:0016021]
		TRINITY_DN193_c0_g1_i3	Derlin	GO:0005789;GO:0016021			endoplasmic reticulum membrane [GO:0005789];integral component of membrane [GO:0016021]
		TRINITY_DN193_c0_g2_i1	Uncharacterized protein	GO:0016021			integral component of membrane [GO:0016021]
		TRINITY_DN143_c0_g1_i1	Peroxidase	GO:0005576;GO:0020037;GO:0046872;GO:0004601;GO:0042744;GO:0006979	hydrogen peroxide catabolic process [GO:0042744];response to oxidative stress [GO:0006979]	heme binding [GO:0020037];metal ion binding [GO:0046872];peroxidase activity [GO:0004601]	extracellular region [GO:0005576]
		TRINITY_DN143_c0_g1_i3	Peroxidase	GO:0005576;GO:0020037;GO:0046872;GO:0004601;GO:0042744;GO:0006979	hydrogen peroxide catabolic process [GO:0042744];response to oxidative stress [GO:0006979]	heme binding [GO:0020037];metal ion binding [GO:0046872];peroxidase activity [GO:0004601]	extracellular region [GO:0005576]
		TRINITY_DN143_c0_g1_i8	Peroxidase	GO:0005576;GO:0020037;GO:0046872;GO:0004601;GO:0042744;GO:0006979	hydrogen peroxide catabolic process [GO:0042744];response to oxidative stress [GO:0006979]	heme binding [GO:0020037];metal ion binding [GO:0046872];peroxidase activity [GO:0004601]	extracellular region [GO:0005576]
		TRINITY_DN143_c0_g1_i6	Peroxidase	GO:0005576;GO:0020037;GO:0046872;GO:0004601;GO:0042744;GO:0006979	hydrogen peroxide catabolic process [GO:0042744];response to oxidative stress [GO:0006979]	heme binding [GO:0020037];metal ion binding [GO:0046872];peroxidase activity [GO:0004601]	extracellular region [GO:0005576]
		TRINITY_DN143_c0_g1_i2	Peroxidase	GO:0005576;GO:0020037;GO:0046872;GO:0004601;GO:0042744;GO:0006979	hydrogen peroxide catabolic process [GO:0042744];response to oxidative stress [GO:0006979]	heme binding [GO:0020037];metal ion binding [GO:0046872];peroxidase activity [GO:0004601]	extracellular region [GO:0005576]
		TRINITY_DN143_c0_g1_i4	Peroxidase	GO:0005576;GO:0020037;GO:0046872;GO:0004601;GO:0042744;GO:0006979	hydrogen peroxide catabolic process [GO:0042744];response to oxidative stress [GO:0006979]	heme binding [GO:0020037];metal ion binding [GO:0046872];peroxidase activity [GO:0004601]	extracellular region [GO:0005576]
		TRINITY_DN143_c0_g1_i7	Peroxidase	GO:0005576;GO:0020037;GO:0046872;GO:0004601;GO:0042744;GO:0006979	hydrogen peroxide catabolic process [GO:0042744];response to oxidative stress [GO:0006979]	heme binding [GO:0020037];metal ion binding [GO:0046872];peroxidase activity [GO:0004601]	extracellular region [GO:0005576]
		TRINITY_DN143_c0_g1_i5	Peroxidase	GO:0005576;GO:0020037;GO:0046872;GO:0004601;GO:0042744;GO:0006979	hydrogen peroxide catabolic process [GO:0042744];response to oxidative stress [GO:0006979]	heme binding [GO:0020037];metal ion binding [GO:0046872];peroxidase activity [GO:0004601]	extracellular region [GO:0005576]
		TRINITY_DN143_c0_g2_i1	Peroxidase	GO:0005576;GO:0020037;GO:0046872;GO:0004601;GO:0042744;GO:0006979	hydrogen peroxide catabolic process [GO:0042744];response to oxidative stress [GO:0006979]	heme binding [GO:0020037];metal ion binding [GO:0046872];peroxidase activity [GO:0004601]	extracellular region [GO:0005576]
		TRINITY_DN143_c1_g1_i1	Peroxidase	GO:0005576;GO:0020037;GO:0046872;GO:0004601;GO:0042744;GO:0006979	hydrogen peroxide catabolic process [GO:0042744];response to oxidative stress [GO:0006979]	heme binding [GO:0020037];metal ion binding [GO:0046872];peroxidase activity [GO:0004601]	extracellular region [GO:0005576]
		TRINITY_DN143_c1_g1_i3	Peroxidase	GO:0005576;GO:0020037;GO:0046872;GO:0004601;GO:0042744;GO:0006979	hydrogen peroxide catabolic process [GO:0042744];response to oxidative stress [GO:0006979]	heme binding [GO:0020037];metal ion binding [GO:0046872];peroxidase activity [GO:0004601]	extracellular region [GO:0005576]
		TRINITY_DN143_c1_g1_i2	Peroxidase	GO:0005576;GO:0020037;GO:0046872;GO:0004601;GO:0042744;GO:0006979	hydrogen peroxide catabolic process [GO:0042744];response to oxidative stress [GO:0006979]	heme binding [GO:0020037];metal ion binding [GO:0046872];peroxidase activity [GO:0004601]	extracellular region [GO:0005576]
		TRINITY_DN143_c2_g1_i1	Peroxidase	GO:0005576;GO:0020037;GO:0046872;GO:0004601;GO:0042744;GO:0006979	hydrogen peroxide catabolic process [GO:0042744];response to oxidative stress [GO:0006979]	heme binding [GO:0020037];metal ion binding [GO:0046872];peroxidase activity [GO:0004601]	extracellular region [GO:0005576]
		TRINITY_DN143_c2_g1_i2	Peroxidase	GO:0005576;GO:0020037;GO:0046872;GO:0004601;GO:0042744;GO:0006979	hydrogen peroxide catabolic process [GO:0042744];response to oxidative stress [GO:0006979]	heme binding [GO:0020037];metal ion binding [GO:0046872];peroxidase activity [GO:0004601]	extracellular region [GO:0005576]
		TRINITY_DN196_c0_g1_i2	Uncharacterized protein	GO:0016021;GO:0005524;GO:0016887		ATP binding [GO:0005524];ATPase activity [GO:0016887]	integral component of membrane [GO:0016021]
		TRINITY_DN196_c0_g1_i4	Uncharacterized protein	GO:0016021;GO:0005524;GO:0016887		ATP binding [GO:0005524];ATPase activity [GO:0016887]	integral component of membrane [GO:0016021]
		TRINITY_DN196_c1_g1_i4	Uncharacterized protein	GO:0009733	response to auxin [GO:0009733]
		TRINITY_DN196_c1_g1_i9	Uncharacterized protein	GO:0009733	response to auxin [GO:0009733]
		TRINITY_DN196_c1_g1_i1	Uncharacterized protein
		TRINITY_DN196_c1_g1_i18	Uncharacterized protein
		TRINITY_DN196_c1_g1_i14	Uncharacterized protein
		TRINITY_DN196_c1_g1_i15	Annexin	GO:0005509;GO:0005544		calcium ion binding [GO:0005509];calcium-dependent phospholipid binding [GO:0005544]
		TRINITY_DN196_c1_g1_i8	Uncharacterized protein	GO:0009733	response to auxin [GO:0009733]
		TRINITY_DN196_c1_g1_i19	Uncharacterized protein	GO:0005509;GO:0005544		calcium ion binding [GO:0005509];calcium-dependent phospholipid binding [GO:0005544]
		TRINITY_DN196_c1_g1_i13	Uncharacterized protein
		TRINITY_DN196_c1_g1_i20	Uncharacterized protein	GO:0009733	response to auxin [GO:0009733]
		TRINITY_DN196_c1_g1_i12	Uncharacterized protein
		TRINITY_DN196_c1_g1_i7	Uncharacterized protein
		TRINITY_DN196_c1_g1_i11	Uncharacterized protein
		TRINITY_DN196_c1_g1_i16	Uncharacterized protein	GO:0009733	response to auxin [GO:0009733]
		TRINITY_DN196_c1_g1_i2	Uncharacterized protein	GO:0009733	response to auxin [GO:0009733]
		TRINITY_DN196_c1_g1_i21	Uncharacterized protein	GO:0009733	response to auxin [GO:0009733]
		TRINITY_DN196_c1_g1_i3	Uncharacterized protein	GO:0009733	response to auxin [GO:0009733]
		TRINITY_DN122_c0_g1_i7	Uncharacterized protein	GO:0003677		DNA binding [GO:0003677]
		TRINITY_DN122_c0_g1_i2	Uncharacterized protein	GO:0003677		DNA binding [GO:0003677]
		TRINITY_DN122_c0_g1_i6	Uncharacterized protein	GO:0003677		DNA binding [GO:0003677]
		TRINITY_DN122_c0_g1_i8	MYB13-2	GO:0003677		DNA binding [GO:0003677]
		TRINITY_DN122_c0_g1_i9	MYB13-2	GO:0003677		DNA binding [GO:0003677]
		TRINITY_DN122_c0_g1_i4	Uncharacterized protein	GO:0003677		DNA binding [GO:0003677]
		TRINITY_DN122_c0_g1_i5	Uncharacterized protein	GO:0003677		DNA binding [GO:0003677]
		TRINITY_DN122_c0_g1_i1	Uncharacterized protein	GO:0003677		DNA binding [GO:0003677]
		TRINITY_DN122_c0_g2_i2	Uncharacterized protein	GO:0003677		DNA binding [GO:0003677]
		TRINITY_DN122_c0_g2_i3	Uncharacterized protein	GO:0003677		DNA binding [GO:0003677]
		TRINITY_DN122_c0_g2_i1	Uncharacterized protein	GO:0003677		DNA binding [GO:0003677]
		TRINITY_DN122_c1_g1_i2	Uncharacterized protein	GO:0003677		DNA binding [GO:0003677]
		TRINITY_DN122_c1_g1_i6	R2R3-type MYB protein	GO:0003677		DNA binding [GO:0003677]
		TRINITY_DN122_c1_g1_i3	R2R3-type MYB protein	GO:0003677		DNA binding [GO:0003677]
		TRINITY_DN122_c1_g1_i5	Uncharacterized protein	GO:0003677		DNA binding [GO:0003677]
		TRINITY_DN122_c1_g1_i1	Uncharacterized protein	GO:0003677		DNA binding [GO:0003677]
		TRINITY_DN122_c1_g1_i4	Uncharacterized protein	GO:0003677		DNA binding [GO:0003677]
		TRINITY_DN186_c0_g1_i1	Uncharacterized protein	GO:0016021			integral component of membrane [GO:0016021]
		TRINITY_DN186_c0_g1_i11	Uncharacterized protein
		TRINITY_DN186_c0_g1_i7	Uncharacterized protein	GO:0016021			integral component of membrane [GO:0016021]
		TRINITY_DN186_c0_g1_i4	Uncharacterized protein	GO:0016021			integral component of membrane [GO:0016021]
		TRINITY_DN186_c0_g1_i3	Uncharacterized protein	GO:0016021			integral component of membrane [GO:0016021]
		TRINITY_DN186_c0_g1_i6	Uncharacterized protein	GO:0016021			integral component of membrane [GO:0016021]
		TRINITY_DN186_c0_g1_i12	Uncharacterized protein	GO:0016021			integral component of membrane [GO:0016021]
		TRINITY_DN186_c0_g1_i2	Uncharacterized protein	GO:0016021			integral component of membrane [GO:0016021]
		TRINITY_DN186_c0_g1_i8	Uncharacterized protein	GO:0016021			integral component of membrane [GO:0016021]
		TRINITY_DN186_c0_g1_i5	Uncharacterized protein
		TRINITY_DN186_c0_g1_i9	Uncharacterized protein
		TRINITY_DN186_c0_g1_i10	Uncharacterized protein
		TRINITY_DN186_c0_g2_i1	Uncharacterized protein
		TRINITY_DN186_c0_g3_i1	Uncharacterized protein	GO:0008270		zinc ion binding [GO:0008270]
		TRINITY_DN139_c0_g1_i2	L-ascorbate oxidase-like protein	GO:0005507;GO:0016491		copper ion binding [GO:0005507];oxidoreductase activity [GO:0016491]
		TRINITY_DN139_c0_g1_i1	Uncharacterized protein	GO:0005507;GO:0016491		copper ion binding [GO:0005507];oxidoreductase activity [GO:0016491]
		TRINITY_DN139_c0_g1_i3	Uncharacterized protein	GO:0005507;GO:0016491		copper ion binding [GO:0005507];oxidoreductase activity [GO:0016491]
		TRINITY_DN139_c0_g1_i6	Uncharacterized protein	GO:0004644;GO:0006189	'de novo' IMP biosynthetic process [GO:0006189]	phosphoribosylglycinamide formyltransferase activity [GO:0004644]
		TRINITY_DN139_c0_g1_i5	Uncharacterized protein	GO:0005507;GO:0016491		copper ion binding [GO:0005507];oxidoreductase activity [GO:0016491]
		TRINITY_DN139_c0_g1_i4	Uncharacterized protein	GO:0005507;GO:0016491		copper ion binding [GO:0005507];oxidoreductase activity [GO:0016491]
		TRINITY_DN139_c0_g1_i7	Uncharacterized protein	GO:0005507;GO:0016491		copper ion binding [GO:0005507];oxidoreductase activity [GO:0016491]
		TRINITY_DN141_c0_g1_i1	Uncharacterized protein	GO:0046983		protein dimerization activity [GO:0046983]
		TRINITY_DN141_c0_g1_i2	Uncharacterized protein	GO:0046983		protein dimerization activity [GO:0046983]
		TRINITY_DN141_c1_g1_i10	Uncharacterized protein	GO:0046983		protein dimerization activity [GO:0046983]
		TRINITY_DN141_c1_g1_i3	Uncharacterized protein	GO:0046983		protein dimerization activity [GO:0046983]
		TRINITY_DN141_c1_g1_i2	Uncharacterized protein	GO:0046983		protein dimerization activity [GO:0046983]
		TRINITY_DN141_c1_g1_i4	Uncharacterized protein	GO:0046983		protein dimerization activity [GO:0046983]
		TRINITY_DN141_c1_g1_i5	Uncharacterized protein	GO:0046983		protein dimerization activity [GO:0046983]
		TRINITY_DN141_c1_g1_i6	Uncharacterized protein	GO:0046983		protein dimerization activity [GO:0046983]
		TRINITY_DN141_c1_g1_i9	Uncharacterized protein	GO:0046983		protein dimerization activity [GO:0046983]
		TRINITY_DN141_c1_g1_i7	Uncharacterized protein	GO:0046983		protein dimerization activity [GO:0046983]
		TRINITY_DN141_c1_g1_i1	Uncharacterized protein	GO:0046983		protein dimerization activity [GO:0046983]
		TRINITY_DN138_c0_g1_i2	Uncharacterized protein
		TRINITY_DN138_c0_g1_i4	Uncharacterized protein
		TRINITY_DN138_c0_g1_i8	Uncharacterized protein
		TRINITY_DN138_c0_g1_i6	Uncharacterized protein
		TRINITY_DN138_c0_g1_i5	Glutathione transferase F5	GO:0004364		glutathione transferase activity [GO:0004364]
		TRINITY_DN138_c0_g1_i3	Glutathione transferase F5	GO:0004364		glutathione transferase activity [GO:0004364]
		TRINITY_DN138_c0_g1_i7	Glutathione-S-transferase 19E50	GO:0016740		transferase activity [GO:0016740]
		TRINITY_DN138_c0_g2_i2	Uncharacterized protein
		TRINITY_DN138_c0_g2_i1	Uncharacterized protein
		TRINITY_DN138_c1_g1_i3	Uncharacterized protein
		TRINITY_DN138_c1_g1_i2	Uncharacterized protein
		TRINITY_DN149_c0_g1_i4	Uncharacterized protein
		TRINITY_DN149_c0_g1_i7	Uncharacterized protein
		TRINITY_DN149_c0_g1_i2	Uncharacterized protein
		TRINITY_DN149_c0_g1_i5	Uncharacterized protein
		TRINITY_DN149_c0_g1_i1	Uncharacterized protein
		TRINITY_DN149_c0_g1_i6	Uncharacterized protein
		TRINITY_DN198_c0_g1_i6	Uncharacterized protein	GO:0042765;GO:0005774;GO:0016255	attachment of GPI anchor to protein [GO:0016255]		GPI-anchor transamidase complex [GO:0042765];vacuolar membrane [GO:0005774]
		TRINITY_DN198_c0_g1_i2	Uncharacterized protein	GO:0042765;GO:0005774;GO:0016255	attachment of GPI anchor to protein [GO:0016255]		GPI-anchor transamidase complex [GO:0042765];vacuolar membrane [GO:0005774]
		TRINITY_DN198_c0_g1_i7	Uncharacterized protein	GO:0042765;GO:0005774;GO:0016255	attachment of GPI anchor to protein [GO:0016255]		GPI-anchor transamidase complex [GO:0042765];vacuolar membrane [GO:0005774]
		TRINITY_DN198_c0_g1_i1	Uncharacterized protein
		TRINITY_DN100_c0_g1_i5	Uncharacterized protein	GO:0005829;GO:0008270		zinc ion binding [GO:0008270]	cytosol [GO:0005829]
		TRINITY_DN100_c0_g1_i2	Uncharacterized protein	GO:0005829;GO:0008270		zinc ion binding [GO:0008270]	cytosol [GO:0005829]
		TRINITY_DN100_c0_g1_i4	Anamorsin homolog; Fe-S cluster assembly protein DRE2 homolog	GO:0005758;GO:0051537;GO:0009055;GO:0046872;GO:0008168;GO:0016226;GO:0043066	iron-sulfur cluster assembly [GO:0016226];negative regulation of apoptotic process [GO:0043066]	2 iron, 2 sulfur cluster binding [GO:0051537];electron transfer activity [GO:0009055];metal ion binding [GO:0046872];methyltransferase activity [GO:0008168]	mitochondrial intermembrane space [GO:0005758]
		TRINITY_DN100_c0_g1_i3	Uncharacterized protein	GO:0005829;GO:0008270		zinc ion binding [GO:0008270]	cytosol [GO:0005829]
		TRINITY_DN100_c0_g1_i1	Uncharacterized protein	GO:0005829;GO:0008270		zinc ion binding [GO:0008270]	cytosol [GO:0005829]
		TRINITY_DN100_c0_g2_i1	Bidirectional sugar transporter SWEET1b	GO:0005789;GO:0005887;GO:0051119;GO:0051260	protein homooligomerization [GO:0051260]	sugar transmembrane transporter activity [GO:0051119]	endoplasmic reticulum membrane [GO:0005789];integral component of plasma membrane [GO:0005887]
		TRINITY_DN125_c0_g1_i7	ATP synthase subunit a; F-ATPase protein 6	GO:0016021;GO:0005743;GO:0045263;GO:0015078;GO:0015986	ATP synthesis coupled proton transport [GO:0015986]	hydrogen ion transmembrane transporter activity [GO:0015078]	integral component of membrane [GO:0016021];mitochondrial inner membrane [GO:0005743];proton-transporting ATP synthase complex, coupling factor F(o) [GO:0045263]
		TRINITY_DN125_c0_g1_i8	Uncharacterized protein
		TRINITY_DN125_c0_g1_i12	Uncharacterized protein	GO:0016021;GO:0022900	electron transport chain [GO:0022900]		integral component of membrane [GO:0016021]
		TRINITY_DN125_c0_g1_i2	ATP synthase protein MI25; ORF25	GO:0016021;GO:0000276;GO:0015078;GO:0015986	ATP synthesis coupled proton transport [GO:0015986]	hydrogen ion transmembrane transporter activity [GO:0015078]	integral component of membrane [GO:0016021];mitochondrial proton-transporting ATP synthase complex, coupling factor F(o) [GO:0000276]
		TRINITY_DN125_c0_g1_i13	Cytochrome c oxidase subunit 2	GO:0016021;GO:0005743;GO:0070469;GO:0005507;GO:0004129		copper ion binding [GO:0005507];cytochrome-c oxidase activity [GO:0004129]	integral component of membrane [GO:0016021];mitochondrial inner membrane [GO:0005743];respiratory chain [GO:0070469]
		TRINITY_DN125_c0_g1_i5	Ribosomal protein S7	GO:0005763;GO:0005739;GO:0005840;GO:0003729;GO:0019843;GO:0003735;GO:0000028;GO:0006412	ribosomal small subunit assembly [GO:0000028];translation [GO:0006412]	mRNA binding [GO:0003729];rRNA binding [GO:0019843];structural constituent of ribosome [GO:0003735]	mitochondrial small ribosomal subunit [GO:0005763];mitochondrion [GO:0005739];ribosome [GO:0005840]
		TRINITY_DN125_c0_g1_i16	ATP synthase protein MI25; ORF25	GO:0016021;GO:0000276;GO:0015078;GO:0015986	ATP synthesis coupled proton transport [GO:0015986]	hydrogen ion transmembrane transporter activity [GO:0015078]	integral component of membrane [GO:0016021];mitochondrial proton-transporting ATP synthase complex, coupling factor F(o) [GO:0000276]
		TRINITY_DN125_c0_g1_i3	Uncharacterized protein	GO:0016021;GO:0022900	electron transport chain [GO:0022900]		integral component of membrane [GO:0016021]
		TRINITY_DN125_c0_g1_i14	Cytochrome c oxidase subunit 2	GO:0016021;GO:0005743;GO:0070469;GO:0005507;GO:0004129		copper ion binding [GO:0005507];cytochrome-c oxidase activity [GO:0004129]	integral component of membrane [GO:0016021];mitochondrial inner membrane [GO:0005743];respiratory chain [GO:0070469]
		TRINITY_DN125_c0_g1_i1	Uncharacterized protein
		TRINITY_DN125_c0_g1_i9	Uncharacterized protein
		TRINITY_DN125_c0_g1_i10	Cytochrome c oxidase subunit 2	GO:0016021;GO:0005743;GO:0070469;GO:0005507;GO:0004129		copper ion binding [GO:0005507];cytochrome-c oxidase activity [GO:0004129]	integral component of membrane [GO:0016021];mitochondrial inner membrane [GO:0005743];respiratory chain [GO:0070469]
		TRINITY_DN125_c0_g1_i11	Uncharacterized protein	GO:0016021;GO:0022900	electron transport chain [GO:0022900]		integral component of membrane [GO:0016021]
		TRINITY_DN125_c0_g1_i17	Putative ATP synthase protein YMF19; 18 kDa membrane-bound protein; Mitochondrial protein YMF19; ORF156	GO:0016021;GO:0031966;GO:0045263;GO:0005524;GO:0006754;GO:0015992	ATP biosynthetic process [GO:0006754];proton transport [GO:0015992]	ATP binding [GO:0005524]	integral component of membrane [GO:0016021];mitochondrial membrane [GO:0031966];proton-transporting ATP synthase complex, coupling factor F(o) [GO:0045263]
		TRINITY_DN129_c0_g1_i8	Uncharacterized protein	GO:0003676		nucleic acid binding [GO:0003676]
		TRINITY_DN129_c0_g1_i6	Uncharacterized protein	GO:0003676		nucleic acid binding [GO:0003676]
		TRINITY_DN129_c0_g1_i2	Uncharacterized protein	GO:0009507;GO:0003729;GO:0019843;GO:1901259;GO:0034337	chloroplast rRNA processing [GO:1901259];RNA folding [GO:0034337]	mRNA binding [GO:0003729];rRNA binding [GO:0019843]	chloroplast [GO:0009507]
		TRINITY_DN129_c0_g1_i1	Uncharacterized protein	GO:0003676		nucleic acid binding [GO:0003676]
		TRINITY_DN129_c0_g1_i3	Uncharacterized protein	GO:0009507;GO:0003729;GO:0019843;GO:1901259;GO:0034337	chloroplast rRNA processing [GO:1901259];RNA folding [GO:0034337]	mRNA binding [GO:0003729];rRNA binding [GO:0019843]	chloroplast [GO:0009507]
		TRINITY_DN129_c0_g1_i7	Uncharacterized protein	GO:0009507;GO:0003729;GO:0019843;GO:1901259;GO:0034337	chloroplast rRNA processing [GO:1901259];RNA folding [GO:0034337]	mRNA binding [GO:0003729];rRNA binding [GO:0019843]	chloroplast [GO:0009507]
		TRINITY_DN129_c0_g1_i9	Uncharacterized protein	GO:0009507;GO:0003729;GO:0019843;GO:1901259;GO:0034337	chloroplast rRNA processing [GO:1901259];RNA folding [GO:0034337]	mRNA binding [GO:0003729];rRNA binding [GO:0019843]	chloroplast [GO:0009507]
		TRINITY_DN129_c0_g1_i4	Uncharacterized protein	GO:0009507;GO:0003729;GO:0019843;GO:1901259;GO:0034337	chloroplast rRNA processing [GO:1901259];RNA folding [GO:0034337]	mRNA binding [GO:0003729];rRNA binding [GO:0019843]	chloroplast [GO:0009507]
		TRINITY_DN132_c0_g1_i3	Uncharacterized protein	GO:0016021;GO:0005886			integral component of membrane [GO:0016021];plasma membrane [GO:0005886]
		TRINITY_DN132_c0_g1_i2	Uncharacterized protein	GO:0016021			integral component of membrane [GO:0016021]
		TRINITY_DN132_c0_g1_i1	Uncharacterized protein	GO:0016021;GO:0005886			integral component of membrane [GO:0016021];plasma membrane [GO:0005886]
		TRINITY_DN132_c0_g2_i4	Uncharacterized protein	GO:0016021			integral component of membrane [GO:0016021]
		TRINITY_DN132_c0_g2_i2	Uncharacterized protein	GO:0016021			integral component of membrane [GO:0016021]
		TRINITY_DN164_c0_g1_i3	Sodium/hydrogen exchanger	GO:0016021;GO:0015385;GO:0006885	regulation of pH [GO:0006885]	sodium [GO:0015385]	integral component of membrane [GO:0016021]
		TRINITY_DN164_c0_g1_i1	Sodium/hydrogen exchanger	GO:0016021;GO:0015385;GO:0006885	regulation of pH [GO:0006885]	sodium [GO:0015385]	integral component of membrane [GO:0016021]
		TRINITY_DN164_c0_g1_i5	Sodium/hydrogen exchanger	GO:0016021;GO:0015385;GO:0006885	regulation of pH [GO:0006885]	sodium [GO:0015385]	integral component of membrane [GO:0016021]
		TRINITY_DN164_c0_g1_i2	Sodium/hydrogen exchanger	GO:0016021;GO:0015385;GO:0006885	regulation of pH [GO:0006885]	sodium [GO:0015385]	integral component of membrane [GO:0016021]
		TRINITY_DN164_c0_g1_i4	Sodium/hydrogen exchanger	GO:0016021;GO:0015385;GO:0006885	regulation of pH [GO:0006885]	sodium [GO:0015385]	integral component of membrane [GO:0016021]
		TRINITY_DN164_c1_g1_i7	Uncharacterized protein	GO:0016021;GO:0005524;GO:0000287;GO:0004012		ATP binding [GO:0005524];magnesium ion binding [GO:0000287];phospholipid-translocating ATPase activity [GO:0004012]	integral component of membrane [GO:0016021]
		TRINITY_DN164_c1_g1_i1	Phospholipid-transporting ATPase	GO:0016021;GO:0005524;GO:0000287;GO:0004012		ATP binding [GO:0005524];magnesium ion binding [GO:0000287];phospholipid-translocating ATPase activity [GO:0004012]	integral component of membrane [GO:0016021]
		TRINITY_DN164_c1_g1_i5	Phospholipid-transporting ATPase	GO:0016021;GO:0005524;GO:0000287;GO:0004012		ATP binding [GO:0005524];magnesium ion binding [GO:0000287];phospholipid-translocating ATPase activity [GO:0004012]	integral component of membrane [GO:0016021]
		TRINITY_DN164_c1_g1_i6	Phospholipid-transporting ATPase	GO:0016021;GO:0005524;GO:0000287;GO:0004012		ATP binding [GO:0005524];magnesium ion binding [GO:0000287];phospholipid-translocating ATPase activity [GO:0004012]	integral component of membrane [GO:0016021]
		TRINITY_DN164_c1_g1_i3	Phospholipid-transporting ATPase	GO:0016021;GO:0005524;GO:0000287;GO:0004012		ATP binding [GO:0005524];magnesium ion binding [GO:0000287];phospholipid-translocating ATPase activity [GO:0004012]	integral component of membrane [GO:0016021]
		TRINITY_DN164_c1_g1_i2	Phospholipid-transporting ATPase	GO:0016021;GO:0005524;GO:0000287;GO:0004012		ATP binding [GO:0005524];magnesium ion binding [GO:0000287];phospholipid-translocating ATPase activity [GO:0004012]	integral component of membrane [GO:0016021]
		TRINITY_DN164_c2_g1_i2	Uncharacterized protein
		TRINITY_DN164_c2_g2_i1	Uncharacterized protein	GO:0016021;GO:0008271		secondary active sulfate transmembrane transporter activity [GO:0008271]	integral component of membrane [GO:0016021]
		TRINITY_DN190_c0_g1_i1	Uncharacterized protein
		TRINITY_DN190_c0_g1_i3	Uncharacterized protein
		TRINITY_DN190_c0_g1_i7	Uncharacterized protein
		TRINITY_DN190_c0_g1_i6	Uncharacterized protein
		TRINITY_DN190_c0_g1_i4	Uncharacterized protein
		TRINITY_DN190_c0_g1_i5	Stomatin-like protein 2	GO:0016020			membrane [GO:0016020]
		TRINITY_DN190_c0_g1_i2	Uncharacterized protein
		TRINITY_DN190_c1_g1_i1	B3 domain-containing protein	GO:0005634;GO:0003677;GO:0006355;GO:0006351	regulation of transcription, DNA-templated [GO:0006355];transcription, DNA-templated [GO:0006351]	DNA binding [GO:0003677]	nucleus [GO:0005634]
		TRINITY_DN190_c2_g1_i1	Uncharacterized protein
		TRINITY_DN190_c2_g1_i2	Uncharacterized protein
		TRINITY_DN152_c0_g1_i2	Predicted protein	GO:0016021			integral component of membrane [GO:0016021]
		TRINITY_DN152_c0_g1_i3	Predicted protein	GO:0016021			integral component of membrane [GO:0016021]
		TRINITY_DN135_c0_g1_i2	Uncharacterized protein
		TRINITY_DN135_c0_g1_i3	Uncharacterized protein
		TRINITY_DN135_c0_g1_i1	Uncharacterized protein
		TRINITY_DN135_c0_g1_i4	Uncharacterized protein
		TRINITY_DN135_c0_g1_i6	PHD finger protein 3	GO:0006351	transcription, DNA-templated [GO:0006351]
		TRINITY_DN140_c0_g1_i10	Uncharacterized protein	GO:0016747		transferase activity, transferring acyl groups other than amino-acyl groups [GO:0016747]
		TRINITY_DN140_c0_g1_i12	Uncharacterized protein	GO:0016747		transferase activity, transferring acyl groups other than amino-acyl groups [GO:0016747]
		TRINITY_DN140_c0_g1_i5	Uncharacterized protein	GO:0016747		transferase activity, transferring acyl groups other than amino-acyl groups [GO:0016747]
		TRINITY_DN140_c0_g1_i2	Uncharacterized protein	GO:0016747		transferase activity, transferring acyl groups other than amino-acyl groups [GO:0016747]
		TRINITY_DN140_c0_g1_i8	Acyltransferase-like protein	GO:0016747		transferase activity, transferring acyl groups other than amino-acyl groups [GO:0016747]
		TRINITY_DN140_c0_g1_i1	Uncharacterized protein	GO:0016747		transferase activity, transferring acyl groups other than amino-acyl groups [GO:0016747]
		TRINITY_DN140_c0_g1_i6	Uncharacterized protein	GO:0016747		transferase activity, transferring acyl groups other than amino-acyl groups [GO:0016747]
		TRINITY_DN140_c0_g1_i7	Acyltransferase-like protein	GO:0016747		transferase activity, transferring acyl groups other than amino-acyl groups [GO:0016747]
		TRINITY_DN140_c0_g1_i11	Uncharacterized protein	GO:0016747		transferase activity, transferring acyl groups other than amino-acyl groups [GO:0016747]
		TRINITY_DN140_c0_g1_i3	Uncharacterized protein	GO:0016747		transferase activity, transferring acyl groups other than amino-acyl groups [GO:0016747]
		TRINITY_DN140_c0_g2_i1	Uncharacterized protein
		TRINITY_DN140_c0_g2_i2	Uncharacterized protein
		TRINITY_DN140_c0_g2_i3	Uncharacterized protein
		TRINITY_DN140_c0_g3_i1	Uncharacterized protein	GO:0016747		transferase activity, transferring acyl groups other than amino-acyl groups [GO:0016747]
		TRINITY_DN140_c1_g3_i2	Uncharacterized protein	GO:0004366;GO:0006650	glycerophospholipid metabolic process [GO:0006650]	glycerol-3-phosphate O-acyltransferase activity [GO:0004366]
		TRINITY_DN140_c2_g1_i5	Uncharacterized protein
		TRINITY_DN140_c2_g1_i6	Uncharacterized protein
		TRINITY_DN140_c2_g1_i4	Uncharacterized protein
		TRINITY_DN140_c2_g1_i10	Uncharacterized protein
		TRINITY_DN140_c2_g1_i11	Uncharacterized protein
		TRINITY_DN178_c0_g1_i6	Uncharacterized protein	GO:0005739			mitochondrion [GO:0005739]
		TRINITY_DN178_c0_g1_i2	Uncharacterized protein	GO:0005739			mitochondrion [GO:0005739]
		TRINITY_DN178_c0_g1_i1	Uncharacterized protein	GO:0005739			mitochondrion [GO:0005739]
		TRINITY_DN178_c0_g1_i9	Uncharacterized protein	GO:0005739			mitochondrion [GO:0005739]
		TRINITY_DN178_c0_g1_i4	Uncharacterized protein	GO:0005739			mitochondrion [GO:0005739]
		TRINITY_DN178_c0_g1_i8	Uncharacterized protein	GO:0005739			mitochondrion [GO:0005739]
		TRINITY_DN178_c0_g1_i7	Uncharacterized protein	GO:0005739			mitochondrion [GO:0005739]
		TRINITY_DN178_c0_g1_i5	Uncharacterized protein	GO:0005739			mitochondrion [GO:0005739]
		TRINITY_DN178_c0_g1_i3	Uncharacterized protein	GO:0005739			mitochondrion [GO:0005739]
		TRINITY_DN178_c0_g1_i10	Uncharacterized protein	GO:0005739			mitochondrion [GO:0005739]
		TRINITY_DN189_c0_g1_i1	Phosphatidylinositol 4-phosphate 5-kinase	GO:0016308;GO:0005524		1-phosphatidylinositol-4-phosphate 5-kinase activity [GO:0016308];ATP binding [GO:0005524]
		TRINITY_DN189_c0_g2_i3	Phosphatidylinositol 4-phosphate 5-kinase	GO:0016308;GO:0005524		1-phosphatidylinositol-4-phosphate 5-kinase activity [GO:0016308];ATP binding [GO:0005524]
		TRINITY_DN189_c0_g2_i1	Phosphatidylinositol 4-phosphate 5-kinase	GO:0016308;GO:0005524		1-phosphatidylinositol-4-phosphate 5-kinase activity [GO:0016308];ATP binding [GO:0005524]
		TRINITY_DN189_c0_g2_i4	Phosphatidylinositol 4-phosphate 5-kinase	GO:0016308;GO:0005524		1-phosphatidylinositol-4-phosphate 5-kinase activity [GO:0016308];ATP binding [GO:0005524]
		TRINITY_DN189_c0_g2_i2	Phosphatidylinositol 4-phosphate 5-kinase	GO:0016308;GO:0005524		1-phosphatidylinositol-4-phosphate 5-kinase activity [GO:0016308];ATP binding [GO:0005524]
		TRINITY_DN121_c0_g1_i1	Uncharacterized protein	GO:0009535;GO:0010287			chloroplast thylakoid membrane [GO:0009535];plastoglobule [GO:0010287]
		TRINITY_DN121_c0_g3_i3	Uncharacterized protein	GO:0009535;GO:0010287			chloroplast thylakoid membrane [GO:0009535];plastoglobule [GO:0010287]
		TRINITY_DN121_c0_g3_i6	Uncharacterized protein	GO:0009535;GO:0010287			chloroplast thylakoid membrane [GO:0009535];plastoglobule [GO:0010287]
		TRINITY_DN121_c0_g3_i4	Uncharacterized protein	GO:0009535;GO:0010287			chloroplast thylakoid membrane [GO:0009535];plastoglobule [GO:0010287]
		TRINITY_DN121_c0_g3_i5	Uncharacterized protein	GO:0009535;GO:0010287			chloroplast thylakoid membrane [GO:0009535];plastoglobule [GO:0010287]
		TRINITY_DN121_c0_g3_i1	Uncharacterized protein	GO:0009535;GO:0010287			chloroplast thylakoid membrane [GO:0009535];plastoglobule [GO:0010287]
		TRINITY_DN121_c1_g1_i1	Uncharacterized protein
		TRINITY_DN121_c1_g1_i2	Uncharacterized protein
		TRINITY_DN182_c0_g1_i5	Uncharacterized protein
		TRINITY_DN182_c0_g1_i6	Uncharacterized protein
		TRINITY_DN182_c0_g1_i1	Uncharacterized protein
		TRINITY_DN182_c0_g1_i4	Uncharacterized protein
		TRINITY_DN182_c0_g1_i8	Uncharacterized protein
		TRINITY_DN182_c0_g1_i7	Uncharacterized protein
		TRINITY_DN172_c0_g1_i3	Uncharacterized protein	GO:0016021;GO:0008289		lipid binding [GO:0008289]	integral component of membrane [GO:0016021]
		TRINITY_DN172_c0_g1_i5	Uncharacterized protein	GO:0008289		lipid binding [GO:0008289]
		TRINITY_DN172_c0_g1_i12	Uncharacterized protein	GO:0008289		lipid binding [GO:0008289]
		TRINITY_DN172_c0_g1_i7	Uncharacterized protein	GO:0016021;GO:0008289		lipid binding [GO:0008289]	integral component of membrane [GO:0016021]
		TRINITY_DN172_c0_g1_i2	Uncharacterized protein	GO:0008289		lipid binding [GO:0008289]
		TRINITY_DN172_c0_g1_i13	Uncharacterized protein	GO:0016021;GO:0008289		lipid binding [GO:0008289]	integral component of membrane [GO:0016021]
		TRINITY_DN172_c0_g1_i9	Uncharacterized protein	GO:0016021;GO:0008289		lipid binding [GO:0008289]	integral component of membrane [GO:0016021]
		TRINITY_DN172_c0_g1_i8	Uncharacterized protein	GO:0008289		lipid binding [GO:0008289]
		TRINITY_DN172_c0_g1_i10	Uncharacterized protein	GO:0016021;GO:0008289		lipid binding [GO:0008289]	integral component of membrane [GO:0016021]
		TRINITY_DN176_c0_g1_i14	Uncharacterized protein
		TRINITY_DN176_c0_g1_i8	Uncharacterized protein
		TRINITY_DN176_c0_g1_i11	Uncharacterized protein
		TRINITY_DN176_c0_g1_i2	Uncharacterized protein
		TRINITY_DN176_c0_g1_i6	Uncharacterized protein
		TRINITY_DN176_c0_g1_i15	Uncharacterized protein
		TRINITY_DN176_c0_g1_i7	Uncharacterized protein
		TRINITY_DN176_c0_g1_i13	Uncharacterized protein
		TRINITY_DN176_c0_g1_i3	Uncharacterized protein
		TRINITY_DN176_c0_g1_i1	Uncharacterized protein
		TRINITY_DN176_c0_g1_i4	Uncharacterized protein
		TRINITY_DN176_c0_g1_i12	Uncharacterized protein
		TRINITY_DN176_c0_g1_i9	Uncharacterized protein
		TRINITY_DN176_c0_g2_i1	Uncharacterized protein	GO:0005622;GO:0008270		zinc ion binding [GO:0008270]	intracellular [GO:0005622]
		TRINITY_DN176_c1_g1_i1	Uncharacterized protein
		TRINITY_DN176_c1_g1_i5	Uncharacterized protein
		TRINITY_DN176_c1_g1_i3	Uncharacterized protein
		TRINITY_DN176_c1_g1_i4	Uncharacterized protein
		TRINITY_DN176_c1_g1_i2	Uncharacterized protein
		TRINITY_DN187_c0_g1_i1	Ethylene-responsive element binding protein 1	GO:0005634;GO:0003677;GO:0003700;GO:0006351	transcription, DNA-templated [GO:0006351]	DNA binding [GO:0003677];DNA binding transcription factor activity [GO:0003700]	nucleus [GO:0005634]
		TRINITY_DN187_c0_g1_i2	Uncharacterized protein	GO:0005634;GO:0003677;GO:0003700;GO:0006351	transcription, DNA-templated [GO:0006351]	DNA binding [GO:0003677];DNA binding transcription factor activity [GO:0003700]	nucleus [GO:0005634]
		TRINITY_DN187_c1_g1_i6	Ethylene responsive transcription factor 5a	GO:0005634;GO:0003677;GO:0003700;GO:0009620;GO:0006351	response to fungus [GO:0009620];transcription, DNA-templated [GO:0006351]	DNA binding [GO:0003677];DNA binding transcription factor activity [GO:0003700]	nucleus [GO:0005634]
		TRINITY_DN187_c1_g1_i2	Uncharacterized protein	GO:0005634;GO:0003677;GO:0003700;GO:0006351	transcription, DNA-templated [GO:0006351]	DNA binding [GO:0003677];DNA binding transcription factor activity [GO:0003700]	nucleus [GO:0005634]
		TRINITY_DN187_c1_g1_i7	Ethylene responsive transcription factor 5a	GO:0005634;GO:0003677;GO:0003700;GO:0009620;GO:0006351	response to fungus [GO:0009620];transcription, DNA-templated [GO:0006351]	DNA binding [GO:0003677];DNA binding transcription factor activity [GO:0003700]	nucleus [GO:0005634]
		TRINITY_DN187_c1_g1_i9	Ethylene responsive transcription factor 5a	GO:0005634;GO:0003677;GO:0003700;GO:0009620;GO:0006351	response to fungus [GO:0009620];transcription, DNA-templated [GO:0006351]	DNA binding [GO:0003677];DNA binding transcription factor activity [GO:0003700]	nucleus [GO:0005634]
		TRINITY_DN187_c1_g1_i3	Uncharacterized protein	GO:0005634;GO:0003677;GO:0003700;GO:0006351	transcription, DNA-templated [GO:0006351]	DNA binding [GO:0003677];DNA binding transcription factor activity [GO:0003700]	nucleus [GO:0005634]
		TRINITY_DN187_c1_g1_i5	Ethylene responsive transcription factor 5a	GO:0005634;GO:0003677;GO:0003700;GO:0009620;GO:0006351	response to fungus [GO:0009620];transcription, DNA-templated [GO:0006351]	DNA binding [GO:0003677];DNA binding transcription factor activity [GO:0003700]	nucleus [GO:0005634]
		TRINITY_DN187_c1_g1_i10	Ethylene responsive transcription factor 5a	GO:0005634;GO:0003677;GO:0003700;GO:0009620;GO:0006351	response to fungus [GO:0009620];transcription, DNA-templated [GO:0006351]	DNA binding [GO:0003677];DNA binding transcription factor activity [GO:0003700]	nucleus [GO:0005634]
		TRINITY_DN187_c1_g1_i4	Uncharacterized protein	GO:0005634;GO:0003677;GO:0003700;GO:0006351	transcription, DNA-templated [GO:0006351]	DNA binding [GO:0003677];DNA binding transcription factor activity [GO:0003700]	nucleus [GO:0005634]
		TRINITY_DN187_c1_g1_i8	Ethylene responsive transcription factor 5a	GO:0005634;GO:0003677;GO:0003700;GO:0009620;GO:0006351	response to fungus [GO:0009620];transcription, DNA-templated [GO:0006351]	DNA binding [GO:0003677];DNA binding transcription factor activity [GO:0003700]	nucleus [GO:0005634]
		TRINITY_DN115_c0_g1_i1	Uncharacterized protein	GO:0004553;GO:0005975	carbohydrate metabolic process [GO:0005975]	hydrolase activity, hydrolyzing O-glycosyl compounds [GO:0004553]
		TRINITY_DN115_c0_g1_i4	Uncharacterized protein	GO:0004553;GO:0005975	carbohydrate metabolic process [GO:0005975]	hydrolase activity, hydrolyzing O-glycosyl compounds [GO:0004553]
		TRINITY_DN115_c0_g1_i5	Beta-glucosidase 47	GO:0004553;GO:0005975	carbohydrate metabolic process [GO:0005975]	hydrolase activity, hydrolyzing O-glycosyl compounds [GO:0004553]
		TRINITY_DN115_c0_g1_i8	Beta-glucosidase 16	GO:0004553;GO:0005975	carbohydrate metabolic process [GO:0005975]	hydrolase activity, hydrolyzing O-glycosyl compounds [GO:0004553]
		TRINITY_DN115_c0_g1_i2	Uncharacterized protein	GO:0004553;GO:0005975	carbohydrate metabolic process [GO:0005975]	hydrolase activity, hydrolyzing O-glycosyl compounds [GO:0004553]
		TRINITY_DN115_c0_g1_i6	Uncharacterized protein	GO:0004553;GO:0005975	carbohydrate metabolic process [GO:0005975]	hydrolase activity, hydrolyzing O-glycosyl compounds [GO:0004553]
		TRINITY_DN115_c0_g1_i7	Beta-glucosidase 1	GO:0004553;GO:0005975	carbohydrate metabolic process [GO:0005975]	hydrolase activity, hydrolyzing O-glycosyl compounds [GO:0004553]
		TRINITY_DN115_c0_g1_i9	Uncharacterized protein	GO:0004553;GO:0005975	carbohydrate metabolic process [GO:0005975]	hydrolase activity, hydrolyzing O-glycosyl compounds [GO:0004553]
		TRINITY_DN115_c0_g1_i3	Beta-glucosidase 1	GO:0004553;GO:0005975	carbohydrate metabolic process [GO:0005975]	hydrolase activity, hydrolyzing O-glycosyl compounds [GO:0004553]
		TRINITY_DN119_c0_g1_i19	Uncharacterized protein
		TRINITY_DN119_c0_g1_i20	Uncharacterized protein
		TRINITY_DN119_c0_g1_i10	Uncharacterized protein
		TRINITY_DN119_c0_g1_i15	Uncharacterized protein
		TRINITY_DN119_c0_g1_i21	Uncharacterized protein
		TRINITY_DN119_c0_g1_i2	Uncharacterized protein
		TRINITY_DN119_c0_g1_i14	Uncharacterized protein
		TRINITY_DN119_c0_g1_i4	Uncharacterized protein
		TRINITY_DN119_c0_g1_i22	Uncharacterized protein
		TRINITY_DN119_c0_g1_i23	Uncharacterized protein
		TRINITY_DN119_c1_g1_i3	Uncharacterized protein
		TRINITY_DN119_c1_g1_i1	Uncharacterized protein
		TRINITY_DN119_c1_g1_i5	Uncharacterized protein
		TRINITY_DN119_c1_g1_i2	Uncharacterized protein
		TRINITY_DN119_c1_g1_i4	Uncharacterized protein
		TRINITY_DN119_c1_g2_i2	Uncharacterized protein
		TRINITY_DN133_c0_g1_i3	Uncharacterized protein
		TRINITY_DN133_c0_g1_i1	Uncharacterized protein
		TRINITY_DN133_c0_g1_i2	Uncharacterized protein
		TRINITY_DN133_c0_g2_i1	Uncharacterized protein	GO:0016788		hydrolase activity, acting on ester bonds [GO:0016788]
		TRINITY_DN133_c1_g1_i2	Uncharacterized protein	GO:0005524;GO:0004674		ATP binding [GO:0005524];protein serine/threonine kinase activity [GO:0004674]
		TRINITY_DN133_c1_g1_i4	Uncharacterized protein	GO:0005524;GO:0004674		ATP binding [GO:0005524];protein serine/threonine kinase activity [GO:0004674]
		TRINITY_DN133_c1_g1_i1	Uncharacterized protein	GO:0005524;GO:0004674		ATP binding [GO:0005524];protein serine/threonine kinase activity [GO:0004674]
		TRINITY_DN133_c1_g1_i3	Uncharacterized protein	GO:0005524;GO:0004674		ATP binding [GO:0005524];protein serine/threonine kinase activity [GO:0004674]
		TRINITY_DN165_c1_g1_i3	Uncharacterized protein
		TRINITY_DN165_c1_g1_i2	Uncharacterized protein
		TRINITY_DN165_c1_g1_i1	Uncharacterized protein
		TRINITY_DN104_c0_g1_i5	Mitogen-activated protein kinase	GO:0005622;GO:0005524;GO:0004707		ATP binding [GO:0005524];MAP kinase activity [GO:0004707]	intracellular [GO:0005622]
		TRINITY_DN104_c0_g1_i1	Mitogen-activated protein kinase	GO:0005622;GO:0005524;GO:0004707		ATP binding [GO:0005524];MAP kinase activity [GO:0004707]	intracellular [GO:0005622]
		TRINITY_DN104_c0_g1_i3	Mitogen-activated protein kinase	GO:0005622;GO:0005524;GO:0004707		ATP binding [GO:0005524];MAP kinase activity [GO:0004707]	intracellular [GO:0005622]
		TRINITY_DN104_c0_g1_i6	Mitogen-activated protein kinase	GO:0005622;GO:0005524;GO:0004707		ATP binding [GO:0005524];MAP kinase activity [GO:0004707]	intracellular [GO:0005622]
		TRINITY_DN131_c0_g1_i4	Uncharacterized protein	GO:0005829			cytosol [GO:0005829]
		TRINITY_DN131_c0_g1_i1	Uncharacterized protein	GO:0005829			cytosol [GO:0005829]
		TRINITY_DN131_c0_g1_i2	Uncharacterized protein	GO:0005829			cytosol [GO:0005829]
		TRINITY_DN131_c0_g1_i5	Uncharacterized protein	GO:0005829			cytosol [GO:0005829]
		TRINITY_DN131_c0_g1_i3	Uncharacterized protein	GO:0005829			cytosol [GO:0005829]
		TRINITY_DN131_c1_g1_i1	Uncharacterized protein	GO:0030915;GO:0000724	double-strand break repair via homologous recombination [GO:0000724]		Smc5-Smc6 complex [GO:0030915]
		TRINITY_DN131_c1_g1_i2	Uncharacterized protein	GO:0030915;GO:0000724	double-strand break repair via homologous recombination [GO:0000724]		Smc5-Smc6 complex [GO:0030915]
		TRINITY_DN114_c0_g1_i2	Uncharacterized protein
		TRINITY_DN114_c0_g1_i3	Uncharacterized protein
		TRINITY_DN114_c0_g1_i4	Uncharacterized protein
		TRINITY_DN114_c0_g1_i1	Uncharacterized protein
		TRINITY_DN114_c0_g2_i1	Uncharacterized protein
		TRINITY_DN105_c0_g1_i6	Homeobox protein HOX1A	GO:0005634;GO:0003677;GO:0046872		DNA binding [GO:0003677];metal ion binding [GO:0046872]	nucleus [GO:0005634]
		TRINITY_DN105_c0_g1_i5	Uncharacterized protein	GO:0005634;GO:0003677;GO:0046872		DNA binding [GO:0003677];metal ion binding [GO:0046872]	nucleus [GO:0005634]
		TRINITY_DN105_c0_g1_i4	Uncharacterized protein	GO:0005634;GO:0003677;GO:0046872		DNA binding [GO:0003677];metal ion binding [GO:0046872]	nucleus [GO:0005634]
		TRINITY_DN105_c0_g1_i1	Uncharacterized protein	GO:0005634;GO:0003677;GO:0046872		DNA binding [GO:0003677];metal ion binding [GO:0046872]	nucleus [GO:0005634]
		TRINITY_DN105_c0_g1_i3	Uncharacterized protein	GO:0005634;GO:0003677		DNA binding [GO:0003677]	nucleus [GO:0005634]
		TRINITY_DN105_c0_g1_i2	Homeobox protein HOX1A	GO:0005634;GO:0003677;GO:0046872		DNA binding [GO:0003677];metal ion binding [GO:0046872]	nucleus [GO:0005634]
		TRINITY_DN105_c0_g1_i7	Uncharacterized protein	GO:0005634;GO:0003677		DNA binding [GO:0003677]	nucleus [GO:0005634]
		TRINITY_DN105_c1_g1_i1	Uncharacterized protein	GO:0005634;GO:0003677;GO:0046872		DNA binding [GO:0003677];metal ion binding [GO:0046872]	nucleus [GO:0005634]
		TRINITY_DN150_c0_g1_i5	Adenylyl cyclase-associated protein	GO:0003779;GO:0007010	cytoskeleton organization [GO:0007010]	actin binding [GO:0003779]
		TRINITY_DN150_c0_g1_i6	Adenylyl cyclase-associated protein	GO:0003779;GO:0007010	cytoskeleton organization [GO:0007010]	actin binding [GO:0003779]
		TRINITY_DN150_c0_g1_i4	Adenylyl cyclase-associated protein	GO:0003779;GO:0007010	cytoskeleton organization [GO:0007010]	actin binding [GO:0003779]
		TRINITY_DN150_c0_g1_i3	Adenylyl cyclase-associated protein	GO:0003779;GO:0007010	cytoskeleton organization [GO:0007010]	actin binding [GO:0003779]
		TRINITY_DN150_c0_g1_i7	Adenylyl cyclase-associated protein	GO:0003779;GO:0007010	cytoskeleton organization [GO:0007010]	actin binding [GO:0003779]
		TRINITY_DN150_c0_g1_i1	Adenylyl cyclase-associated protein	GO:0003779;GO:0007010	cytoskeleton organization [GO:0007010]	actin binding [GO:0003779]
		TRINITY_DN150_c1_g1_i1	Uncharacterized protein
		TRINITY_DN150_c1_g1_i3	Uncharacterized protein
		TRINITY_DN150_c1_g1_i2	Uncharacterized protein
		TRINITY_DN150_c1_g1_i5	Uncharacterized protein
		TRINITY_DN150_c1_g1_i6	Uncharacterized protein
		TRINITY_DN150_c1_g1_i4	Uncharacterized protein
		TRINITY_DN180_c0_g1_i3	Phospholipid-transporting ATPase	GO:0016021;GO:0005524;GO:0000287;GO:0004012		ATP binding [GO:0005524];magnesium ion binding [GO:0000287];phospholipid-translocating ATPase activity [GO:0004012]	integral component of membrane [GO:0016021]
		TRINITY_DN180_c0_g1_i5	Phospholipid-transporting ATPase	GO:0016021;GO:0005524;GO:0000287;GO:0004012		ATP binding [GO:0005524];magnesium ion binding [GO:0000287];phospholipid-translocating ATPase activity [GO:0004012]	integral component of membrane [GO:0016021]
		TRINITY_DN180_c0_g1_i1	Phospholipid-transporting ATPase	GO:0016021;GO:0005524;GO:0000287;GO:0004012		ATP binding [GO:0005524];magnesium ion binding [GO:0000287];phospholipid-translocating ATPase activity [GO:0004012]	integral component of membrane [GO:0016021]
		TRINITY_DN185_c0_g1_i5	Uncharacterized protein
		TRINITY_DN185_c0_g1_i2	Uncharacterized protein
		TRINITY_DN185_c0_g1_i4	Uncharacterized protein
		TRINITY_DN185_c0_g1_i7	Uncharacterized protein
		TRINITY_DN185_c0_g1_i10	Uncharacterized protein
		TRINITY_DN185_c0_g1_i9	Uncharacterized protein
		TRINITY_DN185_c0_g1_i1	Uncharacterized protein
		TRINITY_DN169_c0_g1_i7	Uncharacterized protein
		TRINITY_DN169_c0_g1_i5	Uncharacterized protein
		TRINITY_DN169_c0_g1_i2	Uncharacterized protein
		TRINITY_DN126_c0_g1_i5	Uncharacterized protein
		TRINITY_DN126_c0_g1_i2	Uncharacterized protein
		TRINITY_DN126_c0_g1_i4	Uncharacterized protein
		TRINITY_DN126_c0_g1_i3	Uncharacterized protein
		TRINITY_DN126_c0_g4_i1	Uncharacterized protein
		TRINITY_DN126_c1_g1_i5	Protein transport protein Sec23A	GO:0030127;GO:0000139;GO:0090114;GO:0006886	COPII-coated vesicle budding [GO:0090114];intracellular protein transport [GO:0006886]		COPII vesicle coat [GO:0030127];Golgi membrane [GO:0000139]
		TRINITY_DN126_c1_g1_i11	Uncharacterized protein
		TRINITY_DN126_c1_g1_i14	Uncharacterized protein	GO:0030127;GO:0000139;GO:0008270;GO:0090114;GO:0006886	COPII-coated vesicle budding [GO:0090114];intracellular protein transport [GO:0006886]	zinc ion binding [GO:0008270]	COPII vesicle coat [GO:0030127];Golgi membrane [GO:0000139]
		TRINITY_DN126_c1_g1_i2	18 Kd heat shock protein
		TRINITY_DN126_c1_g1_i9	18 Kd heat shock protein
		TRINITY_DN126_c1_g1_i10	Uncharacterized protein
		TRINITY_DN126_c1_g1_i1	Uncharacterized protein	GO:0030127;GO:0000139;GO:0008270;GO:0090114;GO:0006886	COPII-coated vesicle budding [GO:0090114];intracellular protein transport [GO:0006886]	zinc ion binding [GO:0008270]	COPII vesicle coat [GO:0030127];Golgi membrane [GO:0000139]
		TRINITY_DN126_c1_g1_i6	18 Kd heat shock protein
		TRINITY_DN126_c1_g1_i3	Uncharacterized protein	GO:0030127;GO:0000139;GO:0008270;GO:0090114;GO:0006886	COPII-coated vesicle budding [GO:0090114];intracellular protein transport [GO:0006886]	zinc ion binding [GO:0008270]	COPII vesicle coat [GO:0030127];Golgi membrane [GO:0000139]
		TRINITY_DN145_c0_g1_i3	Uncharacterized protein	GO:0016021;GO:0016787;GO:0006629	lipid metabolic process [GO:0006629]	hydrolase activity [GO:0016787]	integral component of membrane [GO:0016021]
		TRINITY_DN145_c0_g1_i2	Uncharacterized protein	GO:0016021;GO:0016787;GO:0006629	lipid metabolic process [GO:0006629]	hydrolase activity [GO:0016787]	integral component of membrane [GO:0016021]
		TRINITY_DN145_c0_g1_i1	Uncharacterized protein	GO:0016021;GO:0016787;GO:0006629	lipid metabolic process [GO:0006629]	hydrolase activity [GO:0016787]	integral component of membrane [GO:0016021]
		TRINITY_DN145_c0_g1_i4	Uncharacterized protein	GO:0016021;GO:0016787;GO:0006629	lipid metabolic process [GO:0006629]	hydrolase activity [GO:0016787]	integral component of membrane [GO:0016021]
		TRINITY_DN145_c0_g2_i1	Uncharacterized protein	GO:0016787;GO:0006629	lipid metabolic process [GO:0006629]	hydrolase activity [GO:0016787]
		TRINITY_DN163_c0_g1_i2	Uncharacterized protein	GO:0005634;GO:0003677;GO:0003700;GO:0006351	transcription, DNA-templated [GO:0006351]	DNA binding [GO:0003677];DNA binding transcription factor activity [GO:0003700]	nucleus [GO:0005634]
		TRINITY_DN163_c0_g1_i1	Ethylene-responsive factor-like transcription factor ERFL2a	GO:0005634;GO:0003677;GO:0003700;GO:0006351	transcription, DNA-templated [GO:0006351]	DNA binding [GO:0003677];DNA binding transcription factor activity [GO:0003700]	nucleus [GO:0005634]
		TRINITY_DN163_c0_g3_i2	Uncharacterized protein	GO:0005634;GO:0003677;GO:0003700;GO:0006351	transcription, DNA-templated [GO:0006351]	DNA binding [GO:0003677];DNA binding transcription factor activity [GO:0003700]	nucleus [GO:0005634]
		TRINITY_DN163_c0_g3_i1	Uncharacterized protein	GO:0005634;GO:0003677;GO:0003700;GO:0006351	transcription, DNA-templated [GO:0006351]	DNA binding [GO:0003677];DNA binding transcription factor activity [GO:0003700]	nucleus [GO:0005634]
		TRINITY_DN163_c0_g3_i3	Uncharacterized protein	GO:0005634;GO:0003677;GO:0003700;GO:0006351	transcription, DNA-templated [GO:0006351]	DNA binding [GO:0003677];DNA binding transcription factor activity [GO:0003700]	nucleus [GO:0005634]
		TRINITY_DN163_c0_g4_i2	Uncharacterized protein	GO:0005634;GO:0003677;GO:0003700;GO:0006351	transcription, DNA-templated [GO:0006351]	DNA binding [GO:0003677];DNA binding transcription factor activity [GO:0003700]	nucleus [GO:0005634]
		TRINITY_DN163_c0_g4_i1	Uncharacterized protein	GO:0005634;GO:0003677;GO:0003700;GO:0006351	transcription, DNA-templated [GO:0006351]	DNA binding [GO:0003677];DNA binding transcription factor activity [GO:0003700]	nucleus [GO:0005634]
		TRINITY_DN147_c0_g1_i3	Uncharacterized protein	GO:0008234		cysteine-type peptidase activity [GO:0008234]
		TRINITY_DN147_c0_g1_i1	Uncharacterized protein	GO:0008234		cysteine-type peptidase activity [GO:0008234]
		TRINITY_DN147_c0_g1_i11	Uncharacterized protein	GO:0008234		cysteine-type peptidase activity [GO:0008234]
		TRINITY_DN147_c0_g1_i5	Uncharacterized protein	GO:0008234		cysteine-type peptidase activity [GO:0008234]
		TRINITY_DN147_c0_g1_i2	Uncharacterized protein	GO:0008234		cysteine-type peptidase activity [GO:0008234]
		TRINITY_DN147_c0_g1_i8	Uncharacterized protein	GO:0008234		cysteine-type peptidase activity [GO:0008234]
		TRINITY_DN147_c0_g1_i9	Uncharacterized protein	GO:0008234		cysteine-type peptidase activity [GO:0008234]
		TRINITY_DN147_c0_g1_i4	Uncharacterized protein	GO:0008234		cysteine-type peptidase activity [GO:0008234]
		TRINITY_DN147_c0_g1_i6	Uncharacterized protein	GO:0008234		cysteine-type peptidase activity [GO:0008234]
		TRINITY_DN147_c0_g1_i7	Uncharacterized protein	GO:0008234		cysteine-type peptidase activity [GO:0008234]
		TRINITY_DN147_c0_g1_i10	Uncharacterized protein	GO:0008234		cysteine-type peptidase activity [GO:0008234]
		TRINITY_DN112_c0_g1_i6	Sulfhydryl oxidase	GO:0005623;GO:0016021;GO:0016972;GO:0045454	cell redox homeostasis [GO:0045454]	thiol oxidase activity [GO:0016972]	cell [GO:0005623];integral component of membrane [GO:0016021]
		TRINITY_DN112_c0_g1_i2	Sulfhydryl oxidase	GO:0005623;GO:0016021;GO:0016972;GO:0045454	cell redox homeostasis [GO:0045454]	thiol oxidase activity [GO:0016972]	cell [GO:0005623];integral component of membrane [GO:0016021]
		TRINITY_DN112_c0_g1_i3	Sulfhydryl oxidase	GO:0005623;GO:0016021;GO:0016972;GO:0045454	cell redox homeostasis [GO:0045454]	thiol oxidase activity [GO:0016972]	cell [GO:0005623];integral component of membrane [GO:0016021]
		TRINITY_DN112_c0_g1_i8	Sulfhydryl oxidase	GO:0005623;GO:0016021;GO:0016972;GO:0045454	cell redox homeostasis [GO:0045454]	thiol oxidase activity [GO:0016972]	cell [GO:0005623];integral component of membrane [GO:0016021]
		TRINITY_DN112_c0_g1_i1	Sulfhydryl oxidase	GO:0005623;GO:0016021;GO:0016972;GO:0045454	cell redox homeostasis [GO:0045454]	thiol oxidase activity [GO:0016972]	cell [GO:0005623];integral component of membrane [GO:0016021]
		TRINITY_DN112_c0_g1_i9	Sulfhydryl oxidase	GO:0005623;GO:0016021;GO:0016972;GO:0045454	cell redox homeostasis [GO:0045454]	thiol oxidase activity [GO:0016972]	cell [GO:0005623];integral component of membrane [GO:0016021]
		TRINITY_DN112_c0_g1_i5	Sulfhydryl oxidase	GO:0005623;GO:0016021;GO:0016972;GO:0045454	cell redox homeostasis [GO:0045454]	thiol oxidase activity [GO:0016972]	cell [GO:0005623];integral component of membrane [GO:0016021]
		TRINITY_DN112_c0_g2_i1	Sulfhydryl oxidase	GO:0005623;GO:0016021;GO:0016972;GO:0045454	cell redox homeostasis [GO:0045454]	thiol oxidase activity [GO:0016972]	cell [GO:0005623];integral component of membrane [GO:0016021]
		TRINITY_DN120_c0_g1_i3	Glyceraldehyde-3-phosphate dehydrogenase	GO:0051287;GO:0050661;GO:0016620;GO:0006006	glucose metabolic process [GO:0006006]	NAD binding [GO:0051287];NADP binding [GO:0050661];oxidoreductase activity, acting on the aldehyde or oxo group of donors, NAD or NADP as acceptor [GO:0016620]
		TRINITY_DN120_c0_g1_i6	Glyceraldehyde-3-phosphate dehydrogenase	GO:0051287;GO:0050661;GO:0016620;GO:0006006	glucose metabolic process [GO:0006006]	NAD binding [GO:0051287];NADP binding [GO:0050661];oxidoreductase activity, acting on the aldehyde or oxo group of donors, NAD or NADP as acceptor [GO:0016620]
		TRINITY_DN120_c0_g1_i2	Glyceraldehyde-3-phosphate dehydrogenase	GO:0051287;GO:0050661;GO:0016620;GO:0006006	glucose metabolic process [GO:0006006]	NAD binding [GO:0051287];NADP binding [GO:0050661];oxidoreductase activity, acting on the aldehyde or oxo group of donors, NAD or NADP as acceptor [GO:0016620]
		TRINITY_DN120_c0_g1_i8	Glyceraldehyde-3-phosphate dehydrogenase	GO:0051287;GO:0050661;GO:0016620;GO:0006006	glucose metabolic process [GO:0006006]	NAD binding [GO:0051287];NADP binding [GO:0050661];oxidoreductase activity, acting on the aldehyde or oxo group of donors, NAD or NADP as acceptor [GO:0016620]
		TRINITY_DN120_c0_g1_i7	Glyceraldehyde-3-phosphate dehydrogenase	GO:0051287;GO:0050661;GO:0016620;GO:0006006	glucose metabolic process [GO:0006006]	NAD binding [GO:0051287];NADP binding [GO:0050661];oxidoreductase activity, acting on the aldehyde or oxo group of donors, NAD or NADP as acceptor [GO:0016620]
		TRINITY_DN120_c0_g1_i9	Glyceraldehyde-3-phosphate dehydrogenase	GO:0051287;GO:0050661;GO:0016620;GO:0006006	glucose metabolic process [GO:0006006]	NAD binding [GO:0051287];NADP binding [GO:0050661];oxidoreductase activity, acting on the aldehyde or oxo group of donors, NAD or NADP as acceptor [GO:0016620]
		TRINITY_DN120_c0_g1_i10	Glyceraldehyde-3-phosphate dehydrogenase	GO:0051287;GO:0050661;GO:0016620;GO:0006006	glucose metabolic process [GO:0006006]	NAD binding [GO:0051287];NADP binding [GO:0050661];oxidoreductase activity, acting on the aldehyde or oxo group of donors, NAD or NADP as acceptor [GO:0016620]
		TRINITY_DN120_c0_g1_i1	Glyceraldehyde-3-phosphate dehydrogenase	GO:0051287;GO:0050661;GO:0016620;GO:0006006	glucose metabolic process [GO:0006006]	NAD binding [GO:0051287];NADP binding [GO:0050661];oxidoreductase activity, acting on the aldehyde or oxo group of donors, NAD or NADP as acceptor [GO:0016620]
		TRINITY_DN192_c0_g1_i7	Chlorophyll a-b binding protein, chloroplastic	GO:0009535;GO:0016021;GO:0009522;GO:0009523;GO:0016168;GO:0009765;GO:0018298	photosynthesis, light harvesting [GO:0009765];protein-chromophore linkage [GO:0018298]	chlorophyll binding [GO:0016168]	chloroplast thylakoid membrane [GO:0009535];integral component of membrane [GO:0016021];photosystem I [GO:0009522];photosystem II [GO:0009523]
		TRINITY_DN192_c0_g1_i12	Chlorophyll a-b binding protein, chloroplastic	GO:0009535;GO:0016021;GO:0009522;GO:0009523;GO:0016168;GO:0009765;GO:0018298	photosynthesis, light harvesting [GO:0009765];protein-chromophore linkage [GO:0018298]	chlorophyll binding [GO:0016168]	chloroplast thylakoid membrane [GO:0009535];integral component of membrane [GO:0016021];photosystem I [GO:0009522];photosystem II [GO:0009523]
		TRINITY_DN192_c0_g1_i9	Chlorophyll a-b binding protein, chloroplastic	GO:0009535;GO:0016021;GO:0009522;GO:0009523;GO:0016168;GO:0009765;GO:0018298	photosynthesis, light harvesting [GO:0009765];protein-chromophore linkage [GO:0018298]	chlorophyll binding [GO:0016168]	chloroplast thylakoid membrane [GO:0009535];integral component of membrane [GO:0016021];photosystem I [GO:0009522];photosystem II [GO:0009523]
		TRINITY_DN192_c0_g1_i13	Chlorophyll a-b binding protein, chloroplastic	GO:0009535;GO:0016021;GO:0009522;GO:0009523;GO:0016168;GO:0009765;GO:0018298	photosynthesis, light harvesting [GO:0009765];protein-chromophore linkage [GO:0018298]	chlorophyll binding [GO:0016168]	chloroplast thylakoid membrane [GO:0009535];integral component of membrane [GO:0016021];photosystem I [GO:0009522];photosystem II [GO:0009523]
		TRINITY_DN192_c0_g1_i1	Chlorophyll a-b binding protein, chloroplastic	GO:0009941;GO:0009535;GO:0016021;GO:0009522;GO:0009523;GO:0010287;GO:0016168;GO:0031409;GO:0009768;GO:0018298;GO:0009416	photosynthesis, light harvesting in photosystem I [GO:0009768];protein-chromophore linkage [GO:0018298];response to light stimulus [GO:0009416]	chlorophyll binding [GO:0016168];pigment binding [GO:0031409]	chloroplast envelope [GO:0009941];chloroplast thylakoid membrane [GO:0009535];integral component of membrane [GO:0016021];photosystem I [GO:0009522];photosystem II [GO:0009523];plastoglobule [GO:0010287]
		TRINITY_DN192_c0_g1_i16	Chlorophyll a-b binding protein, chloroplastic	GO:0009941;GO:0009535;GO:0016021;GO:0009522;GO:0009523;GO:0010287;GO:0016168;GO:0031409;GO:0009768;GO:0018298;GO:0009416	photosynthesis, light harvesting in photosystem I [GO:0009768];protein-chromophore linkage [GO:0018298];response to light stimulus [GO:0009416]	chlorophyll binding [GO:0016168];pigment binding [GO:0031409]	chloroplast envelope [GO:0009941];chloroplast thylakoid membrane [GO:0009535];integral component of membrane [GO:0016021];photosystem I [GO:0009522];photosystem II [GO:0009523];plastoglobule [GO:0010287]
		TRINITY_DN192_c0_g1_i4	Chlorophyll a-b binding protein, chloroplastic; LHCII type I CAB; LHCP	GO:0009535;GO:0016021;GO:0009522;GO:0009523;GO:0016168;GO:0046872;GO:0009765;GO:0018298	photosynthesis, light harvesting [GO:0009765];protein-chromophore linkage [GO:0018298]	chlorophyll binding [GO:0016168];metal ion binding [GO:0046872]	chloroplast thylakoid membrane [GO:0009535];integral component of membrane [GO:0016021];photosystem I [GO:0009522];photosystem II [GO:0009523]
		TRINITY_DN192_c0_g1_i11	Chlorophyll a-b binding protein, chloroplastic	GO:0009535;GO:0016021;GO:0009522;GO:0009523;GO:0016168;GO:0009765;GO:0018298	photosynthesis, light harvesting [GO:0009765];protein-chromophore linkage [GO:0018298]	chlorophyll binding [GO:0016168]	chloroplast thylakoid membrane [GO:0009535];integral component of membrane [GO:0016021];photosystem I [GO:0009522];photosystem II [GO:0009523]
		TRINITY_DN192_c0_g1_i3	Chlorophyll a-b binding protein, chloroplastic	GO:0009535;GO:0016021;GO:0009522;GO:0009523;GO:0016168;GO:0009765;GO:0018298	photosynthesis, light harvesting [GO:0009765];protein-chromophore linkage [GO:0018298]	chlorophyll binding [GO:0016168]	chloroplast thylakoid membrane [GO:0009535];integral component of membrane [GO:0016021];photosystem I [GO:0009522];photosystem II [GO:0009523]
		TRINITY_DN192_c0_g1_i15	Chlorophyll a-b binding protein, chloroplastic	GO:0009535;GO:0016021;GO:0009522;GO:0009523;GO:0016168;GO:0009765;GO:0018298	photosynthesis, light harvesting [GO:0009765];protein-chromophore linkage [GO:0018298]	chlorophyll binding [GO:0016168]	chloroplast thylakoid membrane [GO:0009535];integral component of membrane [GO:0016021];photosystem I [GO:0009522];photosystem II [GO:0009523]
		TRINITY_DN192_c0_g1_i8	Chlorophyll a-b binding protein, chloroplastic	GO:0009535;GO:0016021;GO:0009522;GO:0009523;GO:0016168;GO:0009765;GO:0018298	photosynthesis, light harvesting [GO:0009765];protein-chromophore linkage [GO:0018298]	chlorophyll binding [GO:0016168]	chloroplast thylakoid membrane [GO:0009535];integral component of membrane [GO:0016021];photosystem I [GO:0009522];photosystem II [GO:0009523]
		TRINITY_DN192_c0_g1_i5	Chlorophyll a-b binding protein, chloroplastic	GO:0009535;GO:0016021;GO:0009522;GO:0009523;GO:0016168;GO:0009765;GO:0018298	photosynthesis, light harvesting [GO:0009765];protein-chromophore linkage [GO:0018298]	chlorophyll binding [GO:0016168]	chloroplast thylakoid membrane [GO:0009535];integral component of membrane [GO:0016021];photosystem I [GO:0009522];photosystem II [GO:0009523]
		TRINITY_DN192_c0_g1_i6	Chlorophyll a-b binding protein, chloroplastic	GO:0009941;GO:0009535;GO:0016021;GO:0009522;GO:0009523;GO:0010287;GO:0016168;GO:0031409;GO:0009768;GO:0018298;GO:0009416	photosynthesis, light harvesting in photosystem I [GO:0009768];protein-chromophore linkage [GO:0018298];response to light stimulus [GO:0009416]	chlorophyll binding [GO:0016168];pigment binding [GO:0031409]	chloroplast envelope [GO:0009941];chloroplast thylakoid membrane [GO:0009535];integral component of membrane [GO:0016021];photosystem I [GO:0009522];photosystem II [GO:0009523];plastoglobule [GO:0010287]
		TRINITY_DN192_c1_g1_i2	Chlorophyll a-b binding protein, chloroplastic	GO:0009535;GO:0016021;GO:0009522;GO:0009523;GO:0016168;GO:0009765;GO:0018298	photosynthesis, light harvesting [GO:0009765];protein-chromophore linkage [GO:0018298]	chlorophyll binding [GO:0016168]	chloroplast thylakoid membrane [GO:0009535];integral component of membrane [GO:0016021];photosystem I [GO:0009522];photosystem II [GO:0009523]
		TRINITY_DN192_c1_g1_i1	Chlorophyll a-b binding protein, chloroplastic	GO:0009535;GO:0016021;GO:0009522;GO:0009523;GO:0016168;GO:0009765;GO:0018298	photosynthesis, light harvesting [GO:0009765];protein-chromophore linkage [GO:0018298]	chlorophyll binding [GO:0016168]	chloroplast thylakoid membrane [GO:0009535];integral component of membrane [GO:0016021];photosystem I [GO:0009522];photosystem II [GO:0009523]
		TRINITY_DN192_c1_g2_i1	Chlorophyll a-b binding protein, chloroplastic	GO:0009535;GO:0016021;GO:0009522;GO:0009523;GO:0016168;GO:0009765;GO:0018298	photosynthesis, light harvesting [GO:0009765];protein-chromophore linkage [GO:0018298]	chlorophyll binding [GO:0016168]	chloroplast thylakoid membrane [GO:0009535];integral component of membrane [GO:0016021];photosystem I [GO:0009522];photosystem II [GO:0009523]
		TRINITY_DN192_c5_g1_i1	Chlorophyll a-b binding protein 2, chloroplastic; Chlorophyll a-b protein 165; CAB-165; LHCII type I CAB-2	GO:0048046;GO:0009507;GO:0009941;GO:0009535;GO:0016021;GO:0009522;GO:0009523;GO:0010287;GO:0009579;GO:0016168;GO:0046872;GO:0031409;GO:0009768;GO:0018298;GO:0009637;GO:0010218;GO:0009750;GO:0010114	photosynthesis, light harvesting in photosystem I [GO:0009768];protein-chromophore linkage [GO:0018298];response to blue light [GO:0009637];response to far red light [GO:0010218];response to fructose [GO:0009750];response to red light [GO:0010114]	chlorophyll binding [GO:0016168];metal ion binding [GO:0046872];pigment binding [GO:0031409]	apoplast [GO:0048046];chloroplast [GO:0009507];chloroplast envelope [GO:0009941];chloroplast thylakoid membrane [GO:0009535];integral component of membrane [GO:0016021];photosystem I [GO:0009522];photosystem II [GO:0009523];plastoglobule [GO:0010287];thylakoid [GO:0009579]
		TRINITY_DN192_c5_g2_i1	Chlorophyll a-b binding protein 2, chloroplastic; Chlorophyll a-b protein 165; CAB-165; LHCII type I CAB-2	GO:0048046;GO:0009507;GO:0009941;GO:0009535;GO:0016021;GO:0009522;GO:0009523;GO:0010287;GO:0009579;GO:0016168;GO:0046872;GO:0031409;GO:0009768;GO:0018298;GO:0009637;GO:0010218;GO:0009750;GO:0010114	photosynthesis, light harvesting in photosystem I [GO:0009768];protein-chromophore linkage [GO:0018298];response to blue light [GO:0009637];response to far red light [GO:0010218];response to fructose [GO:0009750];response to red light [GO:0010114]	chlorophyll binding [GO:0016168];metal ion binding [GO:0046872];pigment binding [GO:0031409]	apoplast [GO:0048046];chloroplast [GO:0009507];chloroplast envelope [GO:0009941];chloroplast thylakoid membrane [GO:0009535];integral component of membrane [GO:0016021];photosystem I [GO:0009522];photosystem II [GO:0009523];plastoglobule [GO:0010287];thylakoid [GO:0009579]
		TRINITY_DN192_c5_g2_i2	Chlorophyll a-b binding protein 2, chloroplastic; Chlorophyll a-b protein 165; CAB-165; LHCII type I CAB-2	GO:0048046;GO:0009507;GO:0009941;GO:0009535;GO:0016021;GO:0009522;GO:0009523;GO:0010287;GO:0009579;GO:0016168;GO:0046872;GO:0031409;GO:0009768;GO:0018298;GO:0009637;GO:0010218;GO:0009750;GO:0010114	photosynthesis, light harvesting in photosystem I [GO:0009768];protein-chromophore linkage [GO:0018298];response to blue light [GO:0009637];response to far red light [GO:0010218];response to fructose [GO:0009750];response to red light [GO:0010114]	chlorophyll binding [GO:0016168];metal ion binding [GO:0046872];pigment binding [GO:0031409]	apoplast [GO:0048046];chloroplast [GO:0009507];chloroplast envelope [GO:0009941];chloroplast thylakoid membrane [GO:0009535];integral component of membrane [GO:0016021];photosystem I [GO:0009522];photosystem II [GO:0009523];plastoglobule [GO:0010287];thylakoid [GO:0009579]
		TRINITY_DN170_c0_g1_i2	Uncharacterized protein	GO:0046872;GO:0004784		metal ion binding [GO:0046872];superoxide dismutase activity [GO:0004784]
		TRINITY_DN170_c0_g1_i4	Uncharacterized protein	GO:0046872;GO:0004784		metal ion binding [GO:0046872];superoxide dismutase activity [GO:0004784]
		TRINITY_DN170_c0_g1_i5	Uncharacterized protein	GO:0046872;GO:0004784		metal ion binding [GO:0046872];superoxide dismutase activity [GO:0004784]
		TRINITY_DN170_c0_g1_i1	Uncharacterized protein	GO:0046872;GO:0004784		metal ion binding [GO:0046872];superoxide dismutase activity [GO:0004784]
		TRINITY_DN170_c0_g1_i6	Uncharacterized protein	GO:0046872;GO:0004784		metal ion binding [GO:0046872];superoxide dismutase activity [GO:0004784]
		TRINITY_DN170_c0_g1_i3	Uncharacterized protein	GO:0046872;GO:0004784		metal ion binding [GO:0046872];superoxide dismutase activity [GO:0004784]
		TRINITY_DN175_c0_g1_i2	Uncharacterized protein
		TRINITY_DN175_c0_g1_i5	Uncharacterized protein
		TRINITY_DN175_c0_g1_i1	Uncharacterized protein
		TRINITY_DN175_c0_g1_i4	Uncharacterized protein
		TRINITY_DN175_c0_g1_i7	Uncharacterized protein
		TRINITY_DN137_c0_g1_i5	Inosine triphosphate pyrophosphatase; ITPase; Inosine triphosphatase; Non-canonical purine NTP pyrophosphatase; Non-standard purine NTP pyrophosphatase; Nucleoside-triphosphate diphosphatase; Nucleoside-triphosphate pyrophosphatase; NTPase	GO:0005737;GO:0046872;GO:0035529;GO:0047429;GO:0000166;GO:0009204;GO:0009117	deoxyribonucleoside triphosphate catabolic process [GO:0009204];nucleotide metabolic process [GO:0009117]	metal ion binding [GO:0046872];NADH pyrophosphatase activity [GO:0035529];nucleoside-triphosphate diphosphatase activity [GO:0047429];nucleotide binding [GO:0000166]	cytoplasm [GO:0005737]
		TRINITY_DN137_c0_g1_i7	Inosine triphosphate pyrophosphatase; ITPase; Inosine triphosphatase; Non-canonical purine NTP pyrophosphatase; Non-standard purine NTP pyrophosphatase; Nucleoside-triphosphate diphosphatase; Nucleoside-triphosphate pyrophosphatase; NTPase	GO:0005737;GO:0046872;GO:0035529;GO:0047429;GO:0000166;GO:0009204;GO:0009117	deoxyribonucleoside triphosphate catabolic process [GO:0009204];nucleotide metabolic process [GO:0009117]	metal ion binding [GO:0046872];NADH pyrophosphatase activity [GO:0035529];nucleoside-triphosphate diphosphatase activity [GO:0047429];nucleotide binding [GO:0000166]	cytoplasm [GO:0005737]
		TRINITY_DN137_c0_g1_i8	Inosine triphosphate pyrophosphatase; ITPase; Inosine triphosphatase; Non-canonical purine NTP pyrophosphatase; Non-standard purine NTP pyrophosphatase; Nucleoside-triphosphate diphosphatase; Nucleoside-triphosphate pyrophosphatase; NTPase	GO:0005737;GO:0046872;GO:0035529;GO:0047429;GO:0000166;GO:0009204;GO:0009117	deoxyribonucleoside triphosphate catabolic process [GO:0009204];nucleotide metabolic process [GO:0009117]	metal ion binding [GO:0046872];NADH pyrophosphatase activity [GO:0035529];nucleoside-triphosphate diphosphatase activity [GO:0047429];nucleotide binding [GO:0000166]	cytoplasm [GO:0005737]
		TRINITY_DN137_c0_g1_i9	Inosine triphosphate pyrophosphatase; ITPase; Inosine triphosphatase; Non-canonical purine NTP pyrophosphatase; Non-standard purine NTP pyrophosphatase; Nucleoside-triphosphate diphosphatase; Nucleoside-triphosphate pyrophosphatase; NTPase	GO:0005737;GO:0046872;GO:0035529;GO:0047429;GO:0000166;GO:0009204;GO:0009117	deoxyribonucleoside triphosphate catabolic process [GO:0009204];nucleotide metabolic process [GO:0009117]	metal ion binding [GO:0046872];NADH pyrophosphatase activity [GO:0035529];nucleoside-triphosphate diphosphatase activity [GO:0047429];nucleotide binding [GO:0000166]	cytoplasm [GO:0005737]
		TRINITY_DN137_c0_g1_i6	Uncharacterized protein	GO:0047429;GO:0009143	nucleoside triphosphate catabolic process [GO:0009143]	nucleoside-triphosphate diphosphatase activity [GO:0047429]
		TRINITY_DN137_c0_g1_i1	Inosine triphosphate pyrophosphatase; ITPase; Inosine triphosphatase; Non-canonical purine NTP pyrophosphatase; Non-standard purine NTP pyrophosphatase; Nucleoside-triphosphate diphosphatase; Nucleoside-triphosphate pyrophosphatase; NTPase	GO:0005737;GO:0046872;GO:0035529;GO:0047429;GO:0000166;GO:0009204;GO:0009117	deoxyribonucleoside triphosphate catabolic process [GO:0009204];nucleotide metabolic process [GO:0009117]	metal ion binding [GO:0046872];NADH pyrophosphatase activity [GO:0035529];nucleoside-triphosphate diphosphatase activity [GO:0047429];nucleotide binding [GO:0000166]	cytoplasm [GO:0005737]
		TRINITY_DN137_c0_g1_i2	Inosine triphosphate pyrophosphatase; ITPase; Inosine triphosphatase; Non-canonical purine NTP pyrophosphatase; Non-standard purine NTP pyrophosphatase; Nucleoside-triphosphate diphosphatase; Nucleoside-triphosphate pyrophosphatase; NTPase	GO:0005737;GO:0046872;GO:0035529;GO:0047429;GO:0000166;GO:0009204;GO:0009117	deoxyribonucleoside triphosphate catabolic process [GO:0009204];nucleotide metabolic process [GO:0009117]	metal ion binding [GO:0046872];NADH pyrophosphatase activity [GO:0035529];nucleoside-triphosphate diphosphatase activity [GO:0047429];nucleotide binding [GO:0000166]	cytoplasm [GO:0005737]
		TRINITY_DN137_c0_g1_i10	Inosine triphosphate pyrophosphatase; ITPase; Inosine triphosphatase; Non-canonical purine NTP pyrophosphatase; Non-standard purine NTP pyrophosphatase; Nucleoside-triphosphate diphosphatase; Nucleoside-triphosphate pyrophosphatase; NTPase	GO:0005737;GO:0046872;GO:0035529;GO:0047429;GO:0000166;GO:0009204;GO:0009117	deoxyribonucleoside triphosphate catabolic process [GO:0009204];nucleotide metabolic process [GO:0009117]	metal ion binding [GO:0046872];NADH pyrophosphatase activity [GO:0035529];nucleoside-triphosphate diphosphatase activity [GO:0047429];nucleotide binding [GO:0000166]	cytoplasm [GO:0005737]
		TRINITY_DN137_c0_g1_i4	Uncharacterized protein	GO:0047429;GO:0009143	nucleoside triphosphate catabolic process [GO:0009143]	nucleoside-triphosphate diphosphatase activity [GO:0047429]
		TRINITY_DN137_c0_g1_i3	Inosine triphosphate pyrophosphatase; ITPase; Inosine triphosphatase; Non-canonical purine NTP pyrophosphatase; Non-standard purine NTP pyrophosphatase; Nucleoside-triphosphate diphosphatase; Nucleoside-triphosphate pyrophosphatase; NTPase	GO:0005737;GO:0046872;GO:0035529;GO:0047429;GO:0000166;GO:0009204;GO:0009117	deoxyribonucleoside triphosphate catabolic process [GO:0009204];nucleotide metabolic process [GO:0009117]	metal ion binding [GO:0046872];NADH pyrophosphatase activity [GO:0035529];nucleoside-triphosphate diphosphatase activity [GO:0047429];nucleotide binding [GO:0000166]	cytoplasm [GO:0005737]
		TRINITY_DN160_c0_g1_i8	HVA22-like protein	GO:0016021			integral component of membrane [GO:0016021]
		TRINITY_DN160_c0_g1_i5	HVA22-like protein	GO:0016021			integral component of membrane [GO:0016021]
		TRINITY_DN160_c0_g1_i3	Uncharacterized protein	GO:0016021			integral component of membrane [GO:0016021]
		TRINITY_DN160_c0_g1_i1	Uncharacterized protein	GO:0016021			integral component of membrane [GO:0016021]
		TRINITY_DN160_c0_g1_i9	Uncharacterized protein	GO:0016021			integral component of membrane [GO:0016021]
		TRINITY_DN160_c0_g1_i10	Uncharacterized protein	GO:0016021			integral component of membrane [GO:0016021]
		TRINITY_DN160_c0_g1_i4	Uncharacterized protein	GO:0016021			integral component of membrane [GO:0016021]
		TRINITY_DN160_c0_g1_i2	Uncharacterized protein	GO:0016021			integral component of membrane [GO:0016021]
		TRINITY_DN160_c0_g1_i7	HVA22-like protein	GO:0016020			membrane [GO:0016020]
		TRINITY_DN160_c0_g1_i6	Uncharacterized protein	GO:0016021			integral component of membrane [GO:0016021]
		TRINITY_DN160_c1_g1_i4	HVA22-like protein	GO:0016020			membrane [GO:0016020]
		TRINITY_DN160_c1_g1_i1	HVA22-like protein	GO:0016020			membrane [GO:0016020]
		TRINITY_DN160_c1_g1_i2	HVA22-like protein	GO:0016020			membrane [GO:0016020]
		TRINITY_DN102_c0_g1_i1	Uncharacterized protein	GO:0070449;GO:0006357	regulation of transcription from RNA polymerase II promoter [GO:0006357]		elongin complex [GO:0070449]
		TRINITY_DN102_c0_g1_i8	Uncharacterized protein	GO:0070449;GO:0006357	regulation of transcription from RNA polymerase II promoter [GO:0006357]		elongin complex [GO:0070449]
		TRINITY_DN102_c0_g1_i2	Uncharacterized protein	GO:0070449;GO:0006357	regulation of transcription from RNA polymerase II promoter [GO:0006357]		elongin complex [GO:0070449]
		TRINITY_DN102_c0_g1_i4	Uncharacterized protein	GO:0070449;GO:0006357	regulation of transcription from RNA polymerase II promoter [GO:0006357]		elongin complex [GO:0070449]
		TRINITY_DN102_c0_g1_i7	Uncharacterized protein	GO:0070449;GO:0006357	regulation of transcription from RNA polymerase II promoter [GO:0006357]		elongin complex [GO:0070449]
		TRINITY_DN102_c0_g1_i5	Uncharacterized protein	GO:0070449;GO:0006357	regulation of transcription from RNA polymerase II promoter [GO:0006357]		elongin complex [GO:0070449]
		TRINITY_DN102_c0_g1_i3	Uncharacterized protein	GO:0070449;GO:0006357	regulation of transcription from RNA polymerase II promoter [GO:0006357]		elongin complex [GO:0070449]
		TRINITY_DN166_c0_g1_i3	Uncharacterized protein
		TRINITY_DN166_c0_g1_i1	Uncharacterized protein
		TRINITY_DN166_c0_g1_i2	Uncharacterized protein
		TRINITY_DN181_c0_g1_i2	Uncharacterized protein	GO:0047746;GO:0015996	chlorophyll catabolic process [GO:0015996]	chlorophyllase activity [GO:0047746]
		TRINITY_DN181_c0_g1_i5	Uncharacterized protein	GO:0047746;GO:0015996	chlorophyll catabolic process [GO:0015996]	chlorophyllase activity [GO:0047746]
		TRINITY_DN181_c0_g1_i8	Uncharacterized protein	GO:0047746;GO:0015996	chlorophyll catabolic process [GO:0015996]	chlorophyllase activity [GO:0047746]
		TRINITY_DN181_c0_g1_i4	Uncharacterized protein	GO:0047746;GO:0015996	chlorophyll catabolic process [GO:0015996]	chlorophyllase activity [GO:0047746]
		TRINITY_DN181_c0_g1_i6	Uncharacterized protein	GO:0047746;GO:0015996	chlorophyll catabolic process [GO:0015996]	chlorophyllase activity [GO:0047746]
		TRINITY_DN181_c0_g1_i3	Uncharacterized protein	GO:0047746;GO:0015996	chlorophyll catabolic process [GO:0015996]	chlorophyllase activity [GO:0047746]
		TRINITY_DN181_c0_g1_i7	Uncharacterized protein	GO:0047746;GO:0015996	chlorophyll catabolic process [GO:0015996]	chlorophyllase activity [GO:0047746]
		TRINITY_DN181_c0_g1_i1	Uncharacterized protein	GO:0047746;GO:0015996	chlorophyll catabolic process [GO:0015996]	chlorophyllase activity [GO:0047746]
		TRINITY_DN181_c0_g2_i1	Chlorophyllase-1	GO:0005773;GO:0047746;GO:0015996;GO:0042742;GO:0050832	chlorophyll catabolic process [GO:0015996];defense response to bacterium [GO:0042742];defense response to fungus [GO:0050832]	chlorophyllase activity [GO:0047746]	vacuole [GO:0005773]
		TRINITY_DN168_c0_g2_i5	S-adenosylmethionine decarboxylase proenzyme	GO:0004014;GO:0008295;GO:0006597	spermidine biosynthetic process [GO:0008295];spermine biosynthetic process [GO:0006597]	adenosylmethionine decarboxylase activity [GO:0004014]
		TRINITY_DN168_c0_g2_i3	S-adenosylmethionine decarboxylase proenzyme	GO:0004014;GO:0008295;GO:0006597	spermidine biosynthetic process [GO:0008295];spermine biosynthetic process [GO:0006597]	adenosylmethionine decarboxylase activity [GO:0004014]
		TRINITY_DN168_c0_g2_i6	Small uORF	GO:0004014		adenosylmethionine decarboxylase activity [GO:0004014]
		TRINITY_DN168_c0_g2_i9	S-adenosylmethionine decarboxylase proenzyme	GO:0004014;GO:0006557;GO:0008295;GO:0006597	S-adenosylmethioninamine biosynthetic process [GO:0006557];spermidine biosynthetic process [GO:0008295];spermine biosynthetic process [GO:0006597]	adenosylmethionine decarboxylase activity [GO:0004014]
		TRINITY_DN168_c0_g2_i1	S-adenosylmethionine decarboxylase proenzyme	GO:0004014;GO:0008295;GO:0006597	spermidine biosynthetic process [GO:0008295];spermine biosynthetic process [GO:0006597]	adenosylmethionine decarboxylase activity [GO:0004014]
		TRINITY_DN168_c0_g2_i11	S-adenosylmethionine decarboxylase proenzyme	GO:0004014;GO:0008295;GO:0006597	spermidine biosynthetic process [GO:0008295];spermine biosynthetic process [GO:0006597]	adenosylmethionine decarboxylase activity [GO:0004014]
		TRINITY_DN168_c0_g2_i4	Uncharacterized protein	GO:0004014;GO:0008295;GO:0006597	spermidine biosynthetic process [GO:0008295];spermine biosynthetic process [GO:0006597]	adenosylmethionine decarboxylase activity [GO:0004014]
		TRINITY_DN168_c0_g2_i10	Uncharacterized protein	GO:0004014;GO:0008295;GO:0006597	spermidine biosynthetic process [GO:0008295];spermine biosynthetic process [GO:0006597]	adenosylmethionine decarboxylase activity [GO:0004014]
		TRINITY_DN168_c0_g2_i8	S-adenosylmethionine decarboxylase proenzyme	GO:0004014;GO:0006557;GO:0008295;GO:0006597	S-adenosylmethioninamine biosynthetic process [GO:0006557];spermidine biosynthetic process [GO:0008295];spermine biosynthetic process [GO:0006597]	adenosylmethionine decarboxylase activity [GO:0004014]
		TRINITY_DN168_c0_g2_i2	Uncharacterized protein	GO:0004014;GO:0008295;GO:0006597	spermidine biosynthetic process [GO:0008295];spermine biosynthetic process [GO:0006597]	adenosylmethionine decarboxylase activity [GO:0004014]
		TRINITY_DN168_c0_g2_i7	S-adenosylmethionine decarboxylase proenzyme	GO:0004014;GO:0008295;GO:0006597	spermidine biosynthetic process [GO:0008295];spermine biosynthetic process [GO:0006597]	adenosylmethionine decarboxylase activity [GO:0004014]
		TRINITY_DN168_c1_g1_i1	S-adenosylmethionine decarboxylase proenzyme	GO:0004014;GO:0008295;GO:0006597	spermidine biosynthetic process [GO:0008295];spermine biosynthetic process [GO:0006597]	adenosylmethionine decarboxylase activity [GO:0004014]
		TRINITY_DN168_c1_g1_i2	S-adenosylmethionine decarboxylase proenzyme	GO:0004014;GO:0008295;GO:0006597	spermidine biosynthetic process [GO:0008295];spermine biosynthetic process [GO:0006597]	adenosylmethionine decarboxylase activity [GO:0004014]
		TRINITY_DN195_c0_g1_i1	RNA recognition domain containing protein,expressed	GO:0003723		RNA binding [GO:0003723]
		TRINITY_DN195_c0_g1_i2	RNA recognition domain containing protein,expressed	GO:0003723		RNA binding [GO:0003723]
		TRINITY_DN195_c0_g1_i5	RNA recognition domain containing protein,expressed	GO:0003723		RNA binding [GO:0003723]
		TRINITY_DN195_c0_g1_i3	RNA recognition domain containing protein,expressed	GO:0003723		RNA binding [GO:0003723]
		TRINITY_DN195_c1_g1_i2	DNA-directed RNA polymerase	GO:0005739;GO:0003677;GO:0003899;GO:0006351	transcription, DNA-templated [GO:0006351]	DNA binding [GO:0003677];DNA-directed 5'-3' RNA polymerase activity [GO:0003899]	mitochondrion [GO:0005739]
		TRINITY_DN195_c1_g2_i7	Uncharacterized protein
		TRINITY_DN195_c1_g2_i13	Uncharacterized protein
		TRINITY_DN195_c1_g2_i11	Uncharacterized protein
		TRINITY_DN195_c1_g2_i10	Uncharacterized protein
		TRINITY_DN195_c1_g2_i4	Putative serine/threonine-protein kinase NAK	GO:0005524;GO:0004672		ATP binding [GO:0005524];protein kinase activity [GO:0004672]
		TRINITY_DN195_c1_g2_i12	Uncharacterized protein
		TRINITY_DN195_c1_g2_i3	Putative serine/threonine-protein kinase NAK	GO:0005524;GO:0004672		ATP binding [GO:0005524];protein kinase activity [GO:0004672]
		TRINITY_DN195_c1_g2_i9	Uncharacterized protein
		TRINITY_DN195_c1_g2_i1	Uncharacterized protein
		TRINITY_DN195_c1_g2_i8	Uncharacterized protein
		TRINITY_DN195_c1_g2_i6	Uncharacterized protein
		TRINITY_DN116_c0_g1_i3	Uncharacterized protein	GO:0017183	peptidyl-diphthamide biosynthetic process from peptidyl-histidine [GO:0017183]
		TRINITY_DN116_c0_g1_i2	Uncharacterized protein	GO:0017183	peptidyl-diphthamide biosynthetic process from peptidyl-histidine [GO:0017183]
		TRINITY_DN116_c0_g1_i4	Uncharacterized protein	GO:0017183	peptidyl-diphthamide biosynthetic process from peptidyl-histidine [GO:0017183]
		TRINITY_DN116_c0_g1_i1	Uncharacterized protein	GO:0017183	peptidyl-diphthamide biosynthetic process from peptidyl-histidine [GO:0017183]
		TRINITY_DN183_c0_g1_i3	Uncharacterized protein	GO:0048868;GO:0009737	pollen tube development [GO:0048868];response to abscisic acid [GO:0009737]
		TRINITY_DN183_c0_g1_i4	Uncharacterized protein	GO:0048868;GO:0009737	pollen tube development [GO:0048868];response to abscisic acid [GO:0009737]
		TRINITY_DN183_c0_g1_i5	Uncharacterized protein	GO:0048868;GO:0009737	pollen tube development [GO:0048868];response to abscisic acid [GO:0009737]
		TRINITY_DN183_c0_g1_i1	Uncharacterized protein	GO:0048868;GO:0009737	pollen tube development [GO:0048868];response to abscisic acid [GO:0009737]
		TRINITY_DN183_c0_g1_i2	Uncharacterized protein	GO:0048868;GO:0009737	pollen tube development [GO:0048868];response to abscisic acid [GO:0009737]
		TRINITY_DN183_c0_g2_i2	Uncharacterized protein
		TRINITY_DN183_c0_g2_i1	Uncharacterized protein
		TRINITY_DN174_c0_g1_i3	Uncharacterized protein
		TRINITY_DN174_c0_g1_i2	Uncharacterized protein
		TRINITY_DN174_c0_g1_i1	Uncharacterized protein
		TRINITY_DN174_c0_g2_i5	Uncharacterized protein
		TRINITY_DN174_c0_g2_i10	Uncharacterized protein
		TRINITY_DN174_c0_g2_i1	Uncharacterized protein
		TRINITY_DN174_c0_g2_i8	Uncharacterized protein
		TRINITY_DN174_c0_g2_i6	Uncharacterized protein
		TRINITY_DN174_c0_g2_i9	Uncharacterized protein
		TRINITY_DN174_c0_g2_i4	Uncharacterized protein
		TRINITY_DN174_c0_g2_i3	Uncharacterized protein
		TRINITY_DN174_c0_g2_i7	Uncharacterized protein
		TRINITY_DN174_c0_g3_i1	Uncharacterized protein
		TRINITY_DN107_c0_g1_i7	Uncharacterized protein	GO:0009941;GO:0009570;GO:0016787;GO:0008152	metabolic process [GO:0008152]	hydrolase activity [GO:0016787]	chloroplast envelope [GO:0009941];chloroplast stroma [GO:0009570]
		TRINITY_DN107_c0_g1_i2	Uncharacterized protein	GO:0009941;GO:0009570;GO:0016787;GO:0008152	metabolic process [GO:0008152]	hydrolase activity [GO:0016787]	chloroplast envelope [GO:0009941];chloroplast stroma [GO:0009570]
		TRINITY_DN107_c0_g1_i14	Uncharacterized protein	GO:0009941;GO:0009570;GO:0016787;GO:0008152	metabolic process [GO:0008152]	hydrolase activity [GO:0016787]	chloroplast envelope [GO:0009941];chloroplast stroma [GO:0009570]
		TRINITY_DN107_c0_g1_i8	Uncharacterized protein	GO:0009941;GO:0009570;GO:0016787;GO:0008152	metabolic process [GO:0008152]	hydrolase activity [GO:0016787]	chloroplast envelope [GO:0009941];chloroplast stroma [GO:0009570]
		TRINITY_DN107_c0_g1_i16	Uncharacterized protein	GO:0009941;GO:0009570;GO:0016787;GO:0008152	metabolic process [GO:0008152]	hydrolase activity [GO:0016787]	chloroplast envelope [GO:0009941];chloroplast stroma [GO:0009570]
		TRINITY_DN107_c0_g1_i1	Uncharacterized protein	GO:0009941;GO:0009570;GO:0016787;GO:0008152	metabolic process [GO:0008152]	hydrolase activity [GO:0016787]	chloroplast envelope [GO:0009941];chloroplast stroma [GO:0009570]
		TRINITY_DN107_c0_g1_i10	Uncharacterized protein	GO:0009941;GO:0009570;GO:0016787;GO:0008152	metabolic process [GO:0008152]	hydrolase activity [GO:0016787]	chloroplast envelope [GO:0009941];chloroplast stroma [GO:0009570]
		TRINITY_DN107_c0_g1_i6	Uncharacterized protein	GO:0009941;GO:0009570;GO:0016787;GO:0008152	metabolic process [GO:0008152]	hydrolase activity [GO:0016787]	chloroplast envelope [GO:0009941];chloroplast stroma [GO:0009570]
		TRINITY_DN107_c0_g1_i5	Uncharacterized protein	GO:0009941;GO:0009570;GO:0016787;GO:0008152	metabolic process [GO:0008152]	hydrolase activity [GO:0016787]	chloroplast envelope [GO:0009941];chloroplast stroma [GO:0009570]
		TRINITY_DN107_c0_g1_i11	Uncharacterized protein	GO:0009941;GO:0009570;GO:0016787;GO:0008152	metabolic process [GO:0008152]	hydrolase activity [GO:0016787]	chloroplast envelope [GO:0009941];chloroplast stroma [GO:0009570]
		TRINITY_DN107_c0_g1_i3	Uncharacterized protein	GO:0009941;GO:0009570;GO:0016787;GO:0008152	metabolic process [GO:0008152]	hydrolase activity [GO:0016787]	chloroplast envelope [GO:0009941];chloroplast stroma [GO:0009570]
		TRINITY_DN107_c0_g1_i17	Uncharacterized protein	GO:0009941;GO:0009570;GO:0016787;GO:0008152	metabolic process [GO:0008152]	hydrolase activity [GO:0016787]	chloroplast envelope [GO:0009941];chloroplast stroma [GO:0009570]
		TRINITY_DN107_c0_g1_i18	Uncharacterized protein	GO:0009941;GO:0009570;GO:0016787;GO:0008152	metabolic process [GO:0008152]	hydrolase activity [GO:0016787]	chloroplast envelope [GO:0009941];chloroplast stroma [GO:0009570]
		TRINITY_DN107_c0_g1_i9	Uncharacterized protein	GO:0009941;GO:0009570;GO:0016787;GO:0008152	metabolic process [GO:0008152]	hydrolase activity [GO:0016787]	chloroplast envelope [GO:0009941];chloroplast stroma [GO:0009570]
		TRINITY_DN107_c0_g1_i12	Uncharacterized protein	GO:0009941;GO:0009570;GO:0016787;GO:0008152	metabolic process [GO:0008152]	hydrolase activity [GO:0016787]	chloroplast envelope [GO:0009941];chloroplast stroma [GO:0009570]
		TRINITY_DN188_c0_g1_i2	Predicted protein	GO:0016021			integral component of membrane [GO:0016021]
		TRINITY_DN188_c0_g1_i3	60S ribosomal protein L37	GO:0005840;GO:0003735;GO:0006412	translation [GO:0006412]	structural constituent of ribosome [GO:0003735]	ribosome [GO:0005840]
		TRINITY_DN188_c0_g1_i4	60S ribosomal protein L37	GO:0005840;GO:0003735;GO:0006412	translation [GO:0006412]	structural constituent of ribosome [GO:0003735]	ribosome [GO:0005840]
		TRINITY_DN188_c0_g1_i1	60S ribosomal protein L37	GO:0005840;GO:0003735;GO:0006412	translation [GO:0006412]	structural constituent of ribosome [GO:0003735]	ribosome [GO:0005840]
		TRINITY_DN188_c0_g5_i2	Ribosomal protein L37	GO:0005840;GO:0046872;GO:0019843;GO:0003735;GO:0006412	translation [GO:0006412]	metal ion binding [GO:0046872];rRNA binding [GO:0019843];structural constituent of ribosome [GO:0003735]	ribosome [GO:0005840]
		TRINITY_DN188_c1_g1_i3	Uncharacterized protein
		TRINITY_DN188_c1_g1_i6	Uncharacterized protein
		TRINITY_DN188_c2_g1_i4	Two-component response regulator-like PRR73	GO:0005634;GO:0000160	phosphorelay signal transduction system [GO:0000160]		nucleus [GO:0005634]
		TRINITY_DN188_c2_g1_i1	Uncharacterized protein	GO:0005634;GO:0000160	phosphorelay signal transduction system [GO:0000160]		nucleus [GO:0005634]
		TRINITY_DN188_c2_g1_i2	Uncharacterized protein	GO:0005634;GO:0000160	phosphorelay signal transduction system [GO:0000160]		nucleus [GO:0005634]
		TRINITY_DN188_c2_g1_i5	Uncharacterized protein	GO:0005634;GO:0000160	phosphorelay signal transduction system [GO:0000160]		nucleus [GO:0005634]
		TRINITY_DN188_c2_g1_i6	Two-component response regulator-like PRR73	GO:0005634;GO:0000160	phosphorelay signal transduction system [GO:0000160]		nucleus [GO:0005634]
		TRINITY_DN188_c6_g1_i1	Glycosyltransferase	GO:0016758;GO:0008152	metabolic process [GO:0008152]	transferase activity, transferring hexosyl groups [GO:0016758]
		TRINITY_DN173_c0_g1_i10	Uncharacterized protein	GO:0016021			integral component of membrane [GO:0016021]
		TRINITY_DN173_c0_g1_i1	Uncharacterized protein	GO:0016021			integral component of membrane [GO:0016021]
		TRINITY_DN173_c0_g1_i7	Uncharacterized protein	GO:0016021			integral component of membrane [GO:0016021]
		TRINITY_DN173_c0_g1_i6	Uncharacterized protein	GO:0016021			integral component of membrane [GO:0016021]
		TRINITY_DN173_c0_g1_i4	Uncharacterized protein	GO:0016021			integral component of membrane [GO:0016021]
		TRINITY_DN173_c0_g1_i9	Uncharacterized protein	GO:0016021			integral component of membrane [GO:0016021]
		TRINITY_DN173_c0_g1_i8	Uncharacterized protein	GO:0016021			integral component of membrane [GO:0016021]
		TRINITY_DN173_c0_g1_i3	Uncharacterized protein	GO:0016021			integral component of membrane [GO:0016021]
		TRINITY_DN173_c0_g1_i2	Uncharacterized protein	GO:0016021			integral component of membrane [GO:0016021]
		TRINITY_DN173_c0_g1_i5	Uncharacterized protein	GO:0016021			integral component of membrane [GO:0016021]
		TRINITY_DN108_c0_g2_i1	Uncharacterized protein	GO:0006950	response to stress [GO:0006950]
		TRINITY_DN108_c0_g2_i2	Uncharacterized protein	GO:0006950	response to stress [GO:0006950]
		TRINITY_DN108_c1_g1_i19	Uncharacterized protein	GO:0031047	gene silencing by RNA [GO:0031047]
		TRINITY_DN108_c1_g1_i10	Uncharacterized protein	GO:0031047	gene silencing by RNA [GO:0031047]
		TRINITY_DN108_c1_g1_i11	Uncharacterized protein	GO:0031047	gene silencing by RNA [GO:0031047]
		TRINITY_DN108_c1_g1_i13	Uncharacterized protein	GO:0031047	gene silencing by RNA [GO:0031047]
		TRINITY_DN108_c1_g1_i7	Uncharacterized protein	GO:0031047	gene silencing by RNA [GO:0031047]
		TRINITY_DN108_c1_g1_i24	Uncharacterized protein	GO:0031047	gene silencing by RNA [GO:0031047]
		TRINITY_DN108_c1_g1_i8	Uncharacterized protein	GO:0031047	gene silencing by RNA [GO:0031047]
		TRINITY_DN108_c1_g1_i2	Uncharacterized protein	GO:0031047	gene silencing by RNA [GO:0031047]
		TRINITY_DN108_c1_g1_i21	Uncharacterized protein	GO:0031047	gene silencing by RNA [GO:0031047]
		TRINITY_DN108_c1_g1_i1	Uncharacterized protein	GO:0031047	gene silencing by RNA [GO:0031047]
		TRINITY_DN108_c1_g1_i4	Uncharacterized protein	GO:0031047	gene silencing by RNA [GO:0031047]
		TRINITY_DN108_c1_g1_i20	Uncharacterized protein	GO:0031047	gene silencing by RNA [GO:0031047]
		TRINITY_DN108_c1_g1_i5	Uncharacterized protein	GO:0031047	gene silencing by RNA [GO:0031047]
		TRINITY_DN108_c1_g1_i9	Uncharacterized protein	GO:0031047	gene silencing by RNA [GO:0031047]
		TRINITY_DN108_c1_g1_i15	Uncharacterized protein	GO:0031047	gene silencing by RNA [GO:0031047]
		TRINITY_DN108_c1_g1_i16	Uncharacterized protein	GO:0031047	gene silencing by RNA [GO:0031047]
		TRINITY_DN108_c1_g1_i18	Uncharacterized protein	GO:0031047	gene silencing by RNA [GO:0031047]
		TRINITY_DN108_c1_g1_i3	Uncharacterized protein	GO:0031047	gene silencing by RNA [GO:0031047]
		TRINITY_DN108_c1_g1_i14	Uncharacterized protein	GO:0031047	gene silencing by RNA [GO:0031047]
		TRINITY_DN108_c1_g1_i23	Uncharacterized protein	GO:0031047	gene silencing by RNA [GO:0031047]
		TRINITY_DN108_c1_g1_i12	Uncharacterized protein	GO:0031047	gene silencing by RNA [GO:0031047]
		TRINITY_DN108_c1_g1_i17	Uncharacterized protein	GO:0031047	gene silencing by RNA [GO:0031047]
		TRINITY_DN108_c1_g2_i2	Uncharacterized protein	GO:0005737;GO:0005635;GO:0046872;GO:0043565;GO:1900458	negative regulation of brassinosteroid mediated signaling pathway [GO:1900458]	metal ion binding [GO:0046872];sequence-specific DNA binding [GO:0043565]	cytoplasm [GO:0005737];nuclear envelope [GO:0005635]
		TRINITY_DN108_c1_g2_i1	Uncharacterized protein	GO:0046872		metal ion binding [GO:0046872]
		TRINITY_DN108_c2_g1_i3	Uncharacterized protein
		TRINITY_DN108_c2_g1_i1	Uncharacterized protein
		TRINITY_DN108_c2_g1_i4	Uncharacterized protein
		TRINITY_DN108_c2_g1_i2	Uncharacterized protein
		TRINITY_DN108_c6_g1_i1	Uncharacterized protein	GO:0005634;GO:0030915;GO:0006974;GO:0031348;GO:0045892	cellular response to DNA damage stimulus [GO:0006974];negative regulation of defense response [GO:0031348];negative regulation of transcription, DNA-templated [GO:0045892]		nucleus [GO:0005634];Smc5-Smc6 complex [GO:0030915]
		TRINITY_DN108_c6_g1_i4	Predicted protein
		TRINITY_DN108_c6_g1_i2	Uncharacterized protein	GO:0005634;GO:0030915;GO:0006974;GO:0031348;GO:0045892	cellular response to DNA damage stimulus [GO:0006974];negative regulation of defense response [GO:0031348];negative regulation of transcription, DNA-templated [GO:0045892]		nucleus [GO:0005634];Smc5-Smc6 complex [GO:0030915]
		TRINITY_DN108_c6_g1_i3	Uncharacterized protein	GO:0005634;GO:0030915;GO:0006974;GO:0031348;GO:0045892	cellular response to DNA damage stimulus [GO:0006974];negative regulation of defense response [GO:0031348];negative regulation of transcription, DNA-templated [GO:0045892]		nucleus [GO:0005634];Smc5-Smc6 complex [GO:0030915]
		TRINITY_DN108_c6_g1_i5	Uncharacterized protein	GO:0005634;GO:0030915;GO:0006974;GO:0031348;GO:0045892	cellular response to DNA damage stimulus [GO:0006974];negative regulation of defense response [GO:0031348];negative regulation of transcription, DNA-templated [GO:0045892]		nucleus [GO:0005634];Smc5-Smc6 complex [GO:0030915]
		TRINITY_DN108_c6_g1_i7	Uncharacterized protein	GO:0005634;GO:0030915;GO:0006974;GO:0031348;GO:0045892	cellular response to DNA damage stimulus [GO:0006974];negative regulation of defense response [GO:0031348];negative regulation of transcription, DNA-templated [GO:0045892]		nucleus [GO:0005634];Smc5-Smc6 complex [GO:0030915]
		TRINITY_DN156_c0_g1_i1	Uncharacterized protein
		TRINITY_DN156_c0_g1_i2	Uncharacterized protein
		TRINITY_DN156_c0_g2_i1	Uncharacterized protein
		TRINITY_DN156_c1_g1_i1	Uncharacterized protein	GO:0005739			mitochondrion [GO:0005739]
		TRINITY_DN118_c0_g1_i11	Uncharacterized protein
		TRINITY_DN118_c1_g1_i2	Uncharacterized protein	GO:0007165	signal transduction [GO:0007165]
		TRINITY_DN118_c1_g1_i3	Uncharacterized protein	GO:0007165	signal transduction [GO:0007165]
		TRINITY_DN118_c1_g1_i1	Uncharacterized protein	GO:0007165	signal transduction [GO:0007165]
		TRINITY_DN197_c0_g1_i1	Uncharacterized protein	GO:0051015;GO:0051017	actin filament bundle assembly [GO:0051017]	actin filament binding [GO:0051015]
		TRINITY_DN197_c0_g1_i4	Villin-2	GO:0051015;GO:0051017	actin filament bundle assembly [GO:0051017]	actin filament binding [GO:0051015]
		TRINITY_DN197_c0_g1_i2	Uncharacterized protein	GO:0051015;GO:0051017	actin filament bundle assembly [GO:0051017]	actin filament binding [GO:0051015]
		TRINITY_DN197_c0_g1_i3	Villin-2	GO:0051015;GO:0051017	actin filament bundle assembly [GO:0051017]	actin filament binding [GO:0051015]
		TRINITY_DN197_c0_g1_i5	Villin-2	GO:0051015;GO:0051017	actin filament bundle assembly [GO:0051017]	actin filament binding [GO:0051015]
		TRINITY_DN197_c0_g1_i6	Villin-2	GO:0051015;GO:0051017	actin filament bundle assembly [GO:0051017]	actin filament binding [GO:0051015]
		TRINITY_DN148_c0_g1_i5	Uncharacterized protein	GO:0030127;GO:0000139;GO:0008270;GO:0090114;GO:0006886	COPII-coated vesicle budding [GO:0090114];intracellular protein transport [GO:0006886]	zinc ion binding [GO:0008270]	COPII vesicle coat [GO:0030127];Golgi membrane [GO:0000139]
		TRINITY_DN148_c0_g1_i4	Uncharacterized protein	GO:0030127;GO:0000139;GO:0008270;GO:0090114;GO:0006886	COPII-coated vesicle budding [GO:0090114];intracellular protein transport [GO:0006886]	zinc ion binding [GO:0008270]	COPII vesicle coat [GO:0030127];Golgi membrane [GO:0000139]
		TRINITY_DN148_c0_g1_i1	Uncharacterized protein	GO:0030127;GO:0000139;GO:0090114;GO:0006886	COPII-coated vesicle budding [GO:0090114];intracellular protein transport [GO:0006886]		COPII vesicle coat [GO:0030127];Golgi membrane [GO:0000139]
		TRINITY_DN148_c0_g1_i9	Uncharacterized protein	GO:0030127;GO:0008270;GO:0006888;GO:0006886	ER to Golgi vesicle-mediated transport [GO:0006888];intracellular protein transport [GO:0006886]	zinc ion binding [GO:0008270]	COPII vesicle coat [GO:0030127]
		TRINITY_DN148_c0_g1_i7	Uncharacterized protein	GO:0030127;GO:0000139;GO:0008270;GO:0090114;GO:0006886	COPII-coated vesicle budding [GO:0090114];intracellular protein transport [GO:0006886]	zinc ion binding [GO:0008270]	COPII vesicle coat [GO:0030127];Golgi membrane [GO:0000139]
		TRINITY_DN148_c0_g1_i3	Uncharacterized protein	GO:0030127;GO:0000139;GO:0008270;GO:0090114;GO:0006886	COPII-coated vesicle budding [GO:0090114];intracellular protein transport [GO:0006886]	zinc ion binding [GO:0008270]	COPII vesicle coat [GO:0030127];Golgi membrane [GO:0000139]
		TRINITY_DN148_c0_g1_i6	Uncharacterized protein	GO:0030127;GO:0008270;GO:0006888;GO:0006886	ER to Golgi vesicle-mediated transport [GO:0006888];intracellular protein transport [GO:0006886]	zinc ion binding [GO:0008270]	COPII vesicle coat [GO:0030127]
		TRINITY_DN148_c0_g1_i2	Uncharacterized protein	GO:0030127;GO:0000139;GO:0008270;GO:0090114;GO:0006886	COPII-coated vesicle budding [GO:0090114];intracellular protein transport [GO:0006886]	zinc ion binding [GO:0008270]	COPII vesicle coat [GO:0030127];Golgi membrane [GO:0000139]
		TRINITY_DN128_c0_g1_i4	30S ribosomal protein S10, chloroplastic	GO:0005840;GO:0003723;GO:0003735;GO:0006412	translation [GO:0006412]	RNA binding [GO:0003723];structural constituent of ribosome [GO:0003735]	ribosome [GO:0005840]
		TRINITY_DN128_c0_g1_i3	30S ribosomal protein S10, chloroplastic	GO:0005840;GO:0003723;GO:0003735;GO:0006412	translation [GO:0006412]	RNA binding [GO:0003723];structural constituent of ribosome [GO:0003735]	ribosome [GO:0005840]
		TRINITY_DN128_c0_g1_i6	30S ribosomal protein S10, chloroplastic	GO:0005840;GO:0003723;GO:0003735;GO:0006412	translation [GO:0006412]	RNA binding [GO:0003723];structural constituent of ribosome [GO:0003735]	ribosome [GO:0005840]
		TRINITY_DN128_c0_g1_i5	30S ribosomal protein S10, chloroplastic	GO:0005840;GO:0003723;GO:0003735;GO:0006412	translation [GO:0006412]	RNA binding [GO:0003723];structural constituent of ribosome [GO:0003735]	ribosome [GO:0005840]
		TRINITY_DN128_c0_g1_i2	Uncharacterized protein	GO:0009570;GO:0005840;GO:0003723;GO:0003735;GO:0006412	translation [GO:0006412]	RNA binding [GO:0003723];structural constituent of ribosome [GO:0003735]	chloroplast stroma [GO:0009570];ribosome [GO:0005840]
		TRINITY_DN128_c0_g1_i1	30S ribosomal protein S10, chloroplastic	GO:0005840;GO:0003723;GO:0003735;GO:0006412	translation [GO:0006412]	RNA binding [GO:0003723];structural constituent of ribosome [GO:0003735]	ribosome [GO:0005840]
		TRINITY_DN128_c0_g1_i7	30S ribosomal protein S10, chloroplastic	GO:0005840;GO:0003723;GO:0003735;GO:0006412	translation [GO:0006412]	RNA binding [GO:0003723];structural constituent of ribosome [GO:0003735]	ribosome [GO:0005840]
		TRINITY_DN128_c0_g1_i8	30S ribosomal protein S10, chloroplastic	GO:0005840;GO:0003723;GO:0003735;GO:0006412	translation [GO:0006412]	RNA binding [GO:0003723];structural constituent of ribosome [GO:0003735]	ribosome [GO:0005840]
		TRINITY_DN191_c0_g1_i6	Uncharacterized protein	GO:0008126;GO:0006631	fatty acid metabolic process [GO:0006631]	acetylesterase activity [GO:0008126]
		TRINITY_DN191_c0_g1_i2	Uncharacterized protein	GO:0008126;GO:0006631	fatty acid metabolic process [GO:0006631]	acetylesterase activity [GO:0008126]
		TRINITY_DN191_c0_g1_i4	Uncharacterized protein	GO:0016788		hydrolase activity, acting on ester bonds [GO:0016788]
		TRINITY_DN191_c0_g1_i5	Uncharacterized protein	GO:0008126;GO:0006631	fatty acid metabolic process [GO:0006631]	acetylesterase activity [GO:0008126]
		TRINITY_DN191_c0_g1_i3	Uncharacterized protein	GO:0016788		hydrolase activity, acting on ester bonds [GO:0016788]
		TRINITY_DN136_c0_g1_i6	Uncharacterized protein
		TRINITY_DN136_c0_g1_i12	Predicted protein
		TRINITY_DN136_c0_g1_i4	Predicted protein
		TRINITY_DN136_c0_g1_i16	Predicted protein
		TRINITY_DN136_c0_g1_i5	Uncharacterized protein
		TRINITY_DN136_c0_g1_i18	Predicted protein
		TRINITY_DN136_c0_g1_i28	Predicted protein
		TRINITY_DN136_c0_g1_i17	Predicted protein
		TRINITY_DN136_c0_g1_i20	Uncharacterized protein
		TRINITY_DN136_c0_g1_i26	Predicted protein
		TRINITY_DN136_c0_g1_i29	Uncharacterized protein
		TRINITY_DN136_c0_g1_i2	Predicted protein
		TRINITY_DN136_c0_g1_i8	Predicted protein
		TRINITY_DN136_c0_g1_i23	Predicted protein
		TRINITY_DN136_c0_g1_i3	Predicted protein
		TRINITY_DN136_c0_g1_i22	Uncharacterized protein
		TRINITY_DN136_c0_g1_i21	Predicted protein
		TRINITY_DN136_c1_g1_i1	Uncharacterized protein	GO:0003777;GO:0007018	microtubule-based movement [GO:0007018]	microtubule motor activity [GO:0003777]
		TRINITY_DN162_c0_g1_i4	Uncharacterized protein	GO:0030136;GO:0005545;GO:0030276;GO:0048268	clathrin coat assembly [GO:0048268]	1-phosphatidylinositol binding [GO:0005545];clathrin binding [GO:0030276]	clathrin-coated vesicle [GO:0030136]
		TRINITY_DN162_c0_g1_i2	Uncharacterized protein	GO:0030136;GO:0005545;GO:0030276;GO:0048268	clathrin coat assembly [GO:0048268]	1-phosphatidylinositol binding [GO:0005545];clathrin binding [GO:0030276]	clathrin-coated vesicle [GO:0030136]
		TRINITY_DN162_c0_g1_i3	Uncharacterized protein	GO:0030136;GO:0005545;GO:0030276;GO:0048268	clathrin coat assembly [GO:0048268]	1-phosphatidylinositol binding [GO:0005545];clathrin binding [GO:0030276]	clathrin-coated vesicle [GO:0030136]
		TRINITY_DN162_c0_g1_i1	Uncharacterized protein	GO:0030136;GO:0005545;GO:0030276;GO:0048268	clathrin coat assembly [GO:0048268]	1-phosphatidylinositol binding [GO:0005545];clathrin binding [GO:0030276]	clathrin-coated vesicle [GO:0030136]
		TRINITY_DN127_c0_g1_i6	Uncharacterized protein	GO:0016021;GO:0015267		channel activity [GO:0015267]	integral component of membrane [GO:0016021]
		TRINITY_DN127_c0_g1_i4	Uncharacterized protein	GO:0048226;GO:0016021;GO:0015267;GO:0015115		channel activity [GO:0015267];silicate transmembrane transporter activity [GO:0015115]	Casparian strip [GO:0048226];integral component of membrane [GO:0016021]
		TRINITY_DN127_c0_g1_i1	Uncharacterized protein	GO:0016021;GO:0015267		channel activity [GO:0015267]	integral component of membrane [GO:0016021]
		TRINITY_DN127_c0_g1_i5	Uncharacterized protein	GO:0016021;GO:0015267		channel activity [GO:0015267]	integral component of membrane [GO:0016021]
		TRINITY_DN127_c0_g1_i3	Uncharacterized protein	GO:0048226;GO:0016021;GO:0015267;GO:0015115		channel activity [GO:0015267];silicate transmembrane transporter activity [GO:0015115]	Casparian strip [GO:0048226];integral component of membrane [GO:0016021]
		TRINITY_DN127_c1_g1_i1	Silicon transporter protein	GO:0016021;GO:0015267		channel activity [GO:0015267]	integral component of membrane [GO:0016021]
		TRINITY_DN155_c0_g1_i10	Putative rRNA methyltransferase; 2'-O-ribose RNA methyltransferase SPB1 homolog	GO:0005730;GO:0008649;GO:0000453	enzyme-directed rRNA 2'-O-methylation [GO:0000453]	rRNA methyltransferase activity [GO:0008649]	nucleolus [GO:0005730]
		TRINITY_DN155_c0_g1_i3	Putative rRNA methyltransferase; 2'-O-ribose RNA methyltransferase SPB1 homolog	GO:0005730;GO:0008649;GO:0000453	enzyme-directed rRNA 2'-O-methylation [GO:0000453]	rRNA methyltransferase activity [GO:0008649]	nucleolus [GO:0005730]
		TRINITY_DN155_c0_g1_i6	Uncharacterized protein
		TRINITY_DN155_c0_g1_i5	Putative rRNA methyltransferase; 2'-O-ribose RNA methyltransferase SPB1 homolog	GO:0005730;GO:0008649;GO:0000453	enzyme-directed rRNA 2'-O-methylation [GO:0000453]	rRNA methyltransferase activity [GO:0008649]	nucleolus [GO:0005730]
		TRINITY_DN155_c0_g1_i1	Putative rRNA methyltransferase; 2'-O-ribose RNA methyltransferase SPB1 homolog	GO:0005730;GO:0008649;GO:0000453	enzyme-directed rRNA 2'-O-methylation [GO:0000453]	rRNA methyltransferase activity [GO:0008649]	nucleolus [GO:0005730]
		TRINITY_DN155_c0_g1_i9	Uncharacterized protein
		TRINITY_DN155_c0_g1_i2	Uncharacterized protein
		TRINITY_DN155_c0_g1_i8	Uncharacterized protein
		TRINITY_DN155_c0_g1_i7	Putative rRNA methyltransferase; 2'-O-ribose RNA methyltransferase SPB1 homolog	GO:0005730;GO:0008649;GO:0000453	enzyme-directed rRNA 2'-O-methylation [GO:0000453]	rRNA methyltransferase activity [GO:0008649]	nucleolus [GO:0005730]
		TRINITY_DN155_c0_g1_i11	Uncharacterized protein
		TRINITY_DN155_c0_g1_i4	Uncharacterized protein
		TRINITY_DN109_c0_g1_i5	Uncharacterized protein	GO:0016021;GO:0005524;GO:0004674		ATP binding [GO:0005524];protein serine/threonine kinase activity [GO:0004674]	integral component of membrane [GO:0016021]
		TRINITY_DN109_c0_g1_i4	Uncharacterized protein	GO:0016021;GO:0005524;GO:0004674		ATP binding [GO:0005524];protein serine/threonine kinase activity [GO:0004674]	integral component of membrane [GO:0016021]
		TRINITY_DN109_c0_g1_i3	Uncharacterized protein	GO:0016021;GO:0005524;GO:0004674		ATP binding [GO:0005524];protein serine/threonine kinase activity [GO:0004674]	integral component of membrane [GO:0016021]
		TRINITY_DN109_c0_g1_i2	Uncharacterized protein	GO:0016021;GO:0005524;GO:0004674		ATP binding [GO:0005524];protein serine/threonine kinase activity [GO:0004674]	integral component of membrane [GO:0016021]
		TRINITY_DN109_c0_g1_i1	Uncharacterized protein	GO:0016021;GO:0005524;GO:0004674		ATP binding [GO:0005524];protein serine/threonine kinase activity [GO:0004674]	integral component of membrane [GO:0016021]
		TRINITY_DN109_c0_g2_i2	Uncharacterized protein	GO:0016021;GO:0005524;GO:0004672		ATP binding [GO:0005524];protein kinase activity [GO:0004672]	integral component of membrane [GO:0016021]
		TRINITY_DN109_c0_g2_i1	Cysteine-rich receptor-like protein kinase 10	GO:0016021;GO:0005524;GO:0004674		ATP binding [GO:0005524];protein serine/threonine kinase activity [GO:0004674]	integral component of membrane [GO:0016021]
		TRINITY_DN109_c0_g3_i1	Serine/threonine-protein kinase	GO:0005524;GO:0004674;GO:0048544	recognition of pollen [GO:0048544]	ATP binding [GO:0005524];protein serine/threonine kinase activity [GO:0004674]
		TRINITY_DN109_c0_g3_i2	Serine/threonine-protein kinase	GO:0016021;GO:0005524;GO:0004672;GO:0048544	recognition of pollen [GO:0048544]	ATP binding [GO:0005524];protein kinase activity [GO:0004672]	integral component of membrane [GO:0016021]
		TRINITY_DN109_c0_g4_i1	Uncharacterized protein	GO:0005524;GO:0030246;GO:0004672;GO:0002229	defense response to oomycetes [GO:0002229]	ATP binding [GO:0005524];carbohydrate binding [GO:0030246];protein kinase activity [GO:0004672]
		TRINITY_DN109_c1_g1_i1	Uncharacterized protein	GO:0016021;GO:0005524;GO:0004672		ATP binding [GO:0005524];protein kinase activity [GO:0004672]	integral component of membrane [GO:0016021]
		TRINITY_DN109_c1_g2_i1	Uncharacterized protein	GO:0016021;GO:0005524;GO:0004672		ATP binding [GO:0005524];protein kinase activity [GO:0004672]	integral component of membrane [GO:0016021]
		TRINITY_DN109_c1_g2_i2	Uncharacterized protein	GO:0016021;GO:0005524;GO:0004672		ATP binding [GO:0005524];protein kinase activity [GO:0004672]	integral component of membrane [GO:0016021]
		TRINITY_DN109_c2_g1_i1	Uncharacterized protein
		TRINITY_DN109_c2_g2_i2	Uncharacterized protein	GO:0005524;GO:0004672		ATP binding [GO:0005524];protein kinase activity [GO:0004672]
		TRINITY_DN109_c2_g2_i1	Uncharacterized protein	GO:0005524;GO:0004672		ATP binding [GO:0005524];protein kinase activity [GO:0004672]
		TRINITY_DN109_c2_g3_i2	Cysteine-rich receptor-like protein kinase 10	GO:0005524;GO:0004672		ATP binding [GO:0005524];protein kinase activity [GO:0004672]
		TRINITY_DN109_c2_g3_i1	Uncharacterized protein	GO:0016021;GO:0005524;GO:0004672		ATP binding [GO:0005524];protein kinase activity [GO:0004672]	integral component of membrane [GO:0016021]
		TRINITY_DN142_c0_g1_i5	Glycosyltransferases	GO:0000139;GO:0016021;GO:0015018;GO:0071555	cell wall organization [GO:0071555]	galactosylgalactosylxylosylprotein 3-beta-glucuronosyltransferase activity [GO:0015018]	Golgi membrane [GO:0000139];integral component of membrane [GO:0016021]
		TRINITY_DN142_c0_g1_i8	Glycosyltransferases	GO:0000139;GO:0016021;GO:0015018;GO:0071555	cell wall organization [GO:0071555]	galactosylgalactosylxylosylprotein 3-beta-glucuronosyltransferase activity [GO:0015018]	Golgi membrane [GO:0000139];integral component of membrane [GO:0016021]
		TRINITY_DN142_c0_g1_i4	Glycosyltransferases	GO:0000139;GO:0015018;GO:0071555	cell wall organization [GO:0071555]	galactosylgalactosylxylosylprotein 3-beta-glucuronosyltransferase activity [GO:0015018]	Golgi membrane [GO:0000139]
		TRINITY_DN142_c0_g1_i2	Glycosyltransferases	GO:0000139;GO:0015018;GO:0071555	cell wall organization [GO:0071555]	galactosylgalactosylxylosylprotein 3-beta-glucuronosyltransferase activity [GO:0015018]	Golgi membrane [GO:0000139]
		TRINITY_DN142_c0_g1_i9	Glycosyltransferases	GO:0000139;GO:0016021;GO:0015018;GO:0071555	cell wall organization [GO:0071555]	galactosylgalactosylxylosylprotein 3-beta-glucuronosyltransferase activity [GO:0015018]	Golgi membrane [GO:0000139];integral component of membrane [GO:0016021]
		TRINITY_DN142_c0_g1_i7	Glycosyltransferases	GO:0000139;GO:0015018;GO:0071555	cell wall organization [GO:0071555]	galactosylgalactosylxylosylprotein 3-beta-glucuronosyltransferase activity [GO:0015018]	Golgi membrane [GO:0000139]
		TRINITY_DN142_c0_g1_i6	Glycosyltransferases	GO:0000139;GO:0016021;GO:0015018;GO:0071555	cell wall organization [GO:0071555]	galactosylgalactosylxylosylprotein 3-beta-glucuronosyltransferase activity [GO:0015018]	Golgi membrane [GO:0000139];integral component of membrane [GO:0016021]
		TRINITY_DN142_c0_g1_i1	Glycosyltransferases	GO:0000139;GO:0015018;GO:0071555	cell wall organization [GO:0071555]	galactosylgalactosylxylosylprotein 3-beta-glucuronosyltransferase activity [GO:0015018]	Golgi membrane [GO:0000139]
		TRINITY_DN142_c0_g1_i10	Glycosyltransferases	GO:0000139;GO:0016021;GO:0015018;GO:0071555	cell wall organization [GO:0071555]	galactosylgalactosylxylosylprotein 3-beta-glucuronosyltransferase activity [GO:0015018]	Golgi membrane [GO:0000139];integral component of membrane [GO:0016021]
		TRINITY_DN158_c0_g1_i8	Uncharacterized protein	GO:0019867			outer membrane [GO:0019867]
		TRINITY_DN158_c0_g1_i4	Uncharacterized protein	GO:0019867			outer membrane [GO:0019867]
		TRINITY_DN158_c0_g1_i2	Uncharacterized protein	GO:0019867			outer membrane [GO:0019867]
		TRINITY_DN158_c0_g1_i7	Uncharacterized protein	GO:0019867			outer membrane [GO:0019867]
		TRINITY_DN158_c0_g1_i6	Uncharacterized protein	GO:0019867			outer membrane [GO:0019867]
		TRINITY_DN158_c0_g1_i1	Uncharacterized protein	GO:0019867			outer membrane [GO:0019867]
		TRINITY_DN171_c0_g1_i3	Uncharacterized protein
		TRINITY_DN171_c0_g1_i1	Uncharacterized protein
		TRINITY_DN171_c0_g1_i7	Uncharacterized protein
		TRINITY_DN171_c0_g1_i8	Uncharacterized protein
		TRINITY_DN171_c0_g1_i9	Uncharacterized protein
		TRINITY_DN171_c0_g1_i2	Uncharacterized protein
		TRINITY_DN171_c0_g1_i10	Uncharacterized protein
		TRINITY_DN171_c0_g1_i4	Uncharacterized protein
		TRINITY_DN171_c0_g1_i6	Uncharacterized protein
		TRINITY_DN161_c0_g1_i3	Peroxidase	GO:0005576;GO:0020037;GO:0046872;GO:0004601;GO:0042744;GO:0006979	hydrogen peroxide catabolic process [GO:0042744];response to oxidative stress [GO:0006979]	heme binding [GO:0020037];metal ion binding [GO:0046872];peroxidase activity [GO:0004601]	extracellular region [GO:0005576]
		TRINITY_DN161_c0_g1_i2	Peroxidase	GO:0005576;GO:0020037;GO:0046872;GO:0004601;GO:0042744;GO:0006979	hydrogen peroxide catabolic process [GO:0042744];response to oxidative stress [GO:0006979]	heme binding [GO:0020037];metal ion binding [GO:0046872];peroxidase activity [GO:0004601]	extracellular region [GO:0005576]
		TRINITY_DN161_c0_g1_i1	Peroxidase	GO:0005576;GO:0020037;GO:0046872;GO:0004601;GO:0042744;GO:0006979	hydrogen peroxide catabolic process [GO:0042744];response to oxidative stress [GO:0006979]	heme binding [GO:0020037];metal ion binding [GO:0046872];peroxidase activity [GO:0004601]	extracellular region [GO:0005576]
		TRINITY_DN161_c0_g2_i3	Uncharacterized protein	GO:0003723;GO:0008270		RNA binding [GO:0003723];zinc ion binding [GO:0008270]
		TRINITY_DN161_c0_g2_i2	Uncharacterized protein	GO:0003723;GO:0008270		RNA binding [GO:0003723];zinc ion binding [GO:0008270]
		TRINITY_DN161_c0_g2_i1	Uncharacterized protein	GO:0003723;GO:0008270		RNA binding [GO:0003723];zinc ion binding [GO:0008270]
		TRINITY_DN161_c0_g3_i1	Peroxidase	GO:0005576;GO:0020037;GO:0046872;GO:0004601;GO:0042744;GO:0006979	hydrogen peroxide catabolic process [GO:0042744];response to oxidative stress [GO:0006979]	heme binding [GO:0020037];metal ion binding [GO:0046872];peroxidase activity [GO:0004601]	extracellular region [GO:0005576]
		TRINITY_DN101_c0_g1_i2	Uncharacterized protein
		TRINITY_DN123_c0_g1_i2	Uncharacterized protein
		TRINITY_DN123_c0_g1_i1	Uncharacterized protein
		TRINITY_DN123_c0_g2_i1	TOM1-like protein 2	GO:0005622;GO:0006886	intracellular protein transport [GO:0006886]		intracellular [GO:0005622]
		TRINITY_DN123_c0_g2_i2	TOM1-like protein 2	GO:0005622;GO:0006886	intracellular protein transport [GO:0006886]		intracellular [GO:0005622]
		TRINITY_DN123_c0_g2_i3	Uncharacterized protein	GO:0005622;GO:0006886	intracellular protein transport [GO:0006886]		intracellular [GO:0005622]
		TRINITY_DN124_c0_g1_i3	Uncharacterized protein
		TRINITY_DN124_c0_g1_i4	Uncharacterized protein
		TRINITY_DN124_c0_g1_i8	Uncharacterized protein
		TRINITY_DN124_c0_g1_i2	Uncharacterized protein
		TRINITY_DN124_c0_g1_i7	Uncharacterized protein
		TRINITY_DN124_c0_g1_i1	Uncharacterized protein
		TRINITY_DN124_c0_g1_i6	Uncharacterized protein
		TRINITY_DN124_c0_g1_i5	Uncharacterized protein
		TRINITY_DN124_c1_g2_i16	Uncharacterized protein	GO:0006355	regulation of transcription, DNA-templated [GO:0006355]
		TRINITY_DN124_c1_g2_i14	Uncharacterized protein	GO:0006355	regulation of transcription, DNA-templated [GO:0006355]
		TRINITY_DN124_c1_g2_i13	Uncharacterized protein	GO:0006355	regulation of transcription, DNA-templated [GO:0006355]
		TRINITY_DN110_c0_g1_i4	Chromatin-remodeling complex ATPase	GO:0016589;GO:0005524;GO:0016887;GO:0003677;GO:0004386;GO:0031491;GO:0043044;GO:0016569	ATP-dependent chromatin remodeling [GO:0043044];covalent chromatin modification [GO:0016569]	ATP binding [GO:0005524];ATPase activity [GO:0016887];DNA binding [GO:0003677];helicase activity [GO:0004386];nucleosome binding [GO:0031491]	NURF complex [GO:0016589]
		TRINITY_DN110_c0_g1_i2	Chromatin-remodeling complex ATPase	GO:0016589;GO:0005524;GO:0016887;GO:0003677;GO:0004386;GO:0031491;GO:0043044;GO:0016569	ATP-dependent chromatin remodeling [GO:0043044];covalent chromatin modification [GO:0016569]	ATP binding [GO:0005524];ATPase activity [GO:0016887];DNA binding [GO:0003677];helicase activity [GO:0004386];nucleosome binding [GO:0031491]	NURF complex [GO:0016589]
		TRINITY_DN110_c0_g1_i3	Chromatin-remodeling complex ATPase	GO:0016589;GO:0005524;GO:0016887;GO:0003677;GO:0004386;GO:0031491;GO:0043044;GO:0016569	ATP-dependent chromatin remodeling [GO:0043044];covalent chromatin modification [GO:0016569]	ATP binding [GO:0005524];ATPase activity [GO:0016887];DNA binding [GO:0003677];helicase activity [GO:0004386];nucleosome binding [GO:0031491]	NURF complex [GO:0016589]
		TRINITY_DN110_c0_g1_i1	Chromatin-remodeling complex ATPase	GO:0016589;GO:0005524;GO:0016887;GO:0003677;GO:0004386;GO:0031491;GO:0043044;GO:0016569	ATP-dependent chromatin remodeling [GO:0043044];covalent chromatin modification [GO:0016569]	ATP binding [GO:0005524];ATPase activity [GO:0016887];DNA binding [GO:0003677];helicase activity [GO:0004386];nucleosome binding [GO:0031491]	NURF complex [GO:0016589]
		TRINITY_DN110_c1_g1_i5	CHD3-type chromatin-remodeling factor PICKLE	GO:0005634;GO:0005524;GO:0046872		ATP binding [GO:0005524];metal ion binding [GO:0046872]	nucleus [GO:0005634]
		TRINITY_DN110_c1_g1_i1	CHD3-type chromatin-remodeling factor PICKLE	GO:0005634;GO:0005524;GO:0046872		ATP binding [GO:0005524];metal ion binding [GO:0046872]	nucleus [GO:0005634]
		TRINITY_DN110_c1_g1_i7	CHD3-type chromatin-remodeling factor PICKLE	GO:0005634;GO:0005524;GO:0046872		ATP binding [GO:0005524];metal ion binding [GO:0046872]	nucleus [GO:0005634]
		TRINITY_DN110_c1_g1_i2	CHD3-type chromatin-remodeling factor PICKLE	GO:0005634;GO:0005524;GO:0046872		ATP binding [GO:0005524];metal ion binding [GO:0046872]	nucleus [GO:0005634]
		TRINITY_DN110_c1_g1_i6	CHD3-type chromatin-remodeling factor PICKLE	GO:0005634;GO:0005524;GO:0046872		ATP binding [GO:0005524];metal ion binding [GO:0046872]	nucleus [GO:0005634]
		TRINITY_DN110_c1_g1_i3	CHD3-type chromatin-remodeling factor PICKLE	GO:0005634;GO:0005524;GO:0046872		ATP binding [GO:0005524];metal ion binding [GO:0046872]	nucleus [GO:0005634]
		TRINITY_DN117_c0_g1_i3	Uncharacterized protein
		TRINITY_DN117_c0_g1_i4	Uncharacterized protein
		TRINITY_DN117_c0_g1_i6	Uncharacterized protein
		TRINITY_DN117_c0_g2_i1	Uncharacterized protein	GO:0016157;GO:0046524;GO:0005985	sucrose metabolic process [GO:0005985]	sucrose synthase activity [GO:0016157];sucrose-phosphate synthase activity [GO:0046524]
		TRINITY_DN117_c0_g2_i6	Uncharacterized protein	GO:0016157;GO:0046524;GO:0005985	sucrose metabolic process [GO:0005985]	sucrose synthase activity [GO:0016157];sucrose-phosphate synthase activity [GO:0046524]
		TRINITY_DN117_c0_g2_i4	Uncharacterized protein	GO:0016157;GO:0046524;GO:0005985	sucrose metabolic process [GO:0005985]	sucrose synthase activity [GO:0016157];sucrose-phosphate synthase activity [GO:0046524]
		TRINITY_DN117_c0_g2_i3	Uncharacterized protein	GO:0016157;GO:0046524;GO:0005985	sucrose metabolic process [GO:0005985]	sucrose synthase activity [GO:0016157];sucrose-phosphate synthase activity [GO:0046524]
		TRINITY_DN117_c0_g3_i5	Sucrose-phosphate synthase 1	GO:0016157;GO:0005985	sucrose metabolic process [GO:0005985]	sucrose synthase activity [GO:0016157]
		TRINITY_DN117_c0_g3_i3	Sucrose-phosphate synthase 9	GO:0016157;GO:0046524;GO:0005985	sucrose metabolic process [GO:0005985]	sucrose synthase activity [GO:0016157];sucrose-phosphate synthase activity [GO:0046524]
		TRINITY_DN117_c0_g3_i1	Uncharacterized protein	GO:0016157;GO:0046524;GO:0005985	sucrose metabolic process [GO:0005985]	sucrose synthase activity [GO:0016157];sucrose-phosphate synthase activity [GO:0046524]
		TRINITY_DN117_c0_g3_i2	Uncharacterized protein	GO:0016157;GO:0046524;GO:0005985	sucrose metabolic process [GO:0005985]	sucrose synthase activity [GO:0016157];sucrose-phosphate synthase activity [GO:0046524]
		TRINITY_DN117_c0_g3_i4	Sucrose-phosphate synthase 9	GO:0016157;GO:0046524;GO:0005985	sucrose metabolic process [GO:0005985]	sucrose synthase activity [GO:0016157];sucrose-phosphate synthase activity [GO:0046524]
		TRINITY_DN117_c1_g1_i1	Uncharacterized protein	GO:0016157;GO:0046524;GO:0005985	sucrose metabolic process [GO:0005985]	sucrose synthase activity [GO:0016157];sucrose-phosphate synthase activity [GO:0046524]
		TRINITY_DN117_c2_g1_i1	Uncharacterized protein	GO:0016157;GO:0046524;GO:0005985	sucrose metabolic process [GO:0005985]	sucrose synthase activity [GO:0016157];sucrose-phosphate synthase activity [GO:0046524]
		TRINITY_DN113_c0_g1_i1	60S ribosomal protein L34	GO:0005840;GO:0003735;GO:0006412	translation [GO:0006412]	structural constituent of ribosome [GO:0003735]	ribosome [GO:0005840]
		TRINITY_DN113_c0_g1_i2	Uncharacterized protein	GO:0005840;GO:0003735;GO:0006412	translation [GO:0006412]	structural constituent of ribosome [GO:0003735]	ribosome [GO:0005840]
		TRINITY_DN113_c0_g2_i2	Uncharacterized protein	GO:0005840;GO:0003735;GO:0006412	translation [GO:0006412]	structural constituent of ribosome [GO:0003735]	ribosome [GO:0005840]
		TRINITY_DN199_c0_g1_i10	Uncharacterized protein	GO:0016021;GO:0022857		transmembrane transporter activity [GO:0022857]	integral component of membrane [GO:0016021]
		TRINITY_DN199_c0_g1_i11	Uncharacterized protein	GO:0016021;GO:0022857		transmembrane transporter activity [GO:0022857]	integral component of membrane [GO:0016021]
		TRINITY_DN199_c0_g1_i4	Uncharacterized protein	GO:0016021;GO:0022857		transmembrane transporter activity [GO:0022857]	integral component of membrane [GO:0016021]
		TRINITY_DN199_c0_g1_i13	Uncharacterized protein	GO:0016021;GO:0022857		transmembrane transporter activity [GO:0022857]	integral component of membrane [GO:0016021]
		TRINITY_DN199_c0_g1_i1	Uncharacterized protein	GO:0016021;GO:0022857		transmembrane transporter activity [GO:0022857]	integral component of membrane [GO:0016021]
		TRINITY_DN199_c0_g1_i8	Uncharacterized protein	GO:0016021;GO:0022857		transmembrane transporter activity [GO:0022857]	integral component of membrane [GO:0016021]
		TRINITY_DN199_c0_g1_i16	Uncharacterized protein	GO:0016021;GO:0022857		transmembrane transporter activity [GO:0022857]	integral component of membrane [GO:0016021]
		TRINITY_DN199_c0_g1_i2	Predicted protein	GO:0016021;GO:0022857		transmembrane transporter activity [GO:0022857]	integral component of membrane [GO:0016021]
		TRINITY_DN199_c0_g1_i14	Uncharacterized protein	GO:0016021;GO:0022857		transmembrane transporter activity [GO:0022857]	integral component of membrane [GO:0016021]
		TRINITY_DN199_c0_g1_i17	Uncharacterized protein	GO:0016021;GO:0022857		transmembrane transporter activity [GO:0022857]	integral component of membrane [GO:0016021]
		TRINITY_DN199_c0_g1_i12	Uncharacterized protein	GO:0016021;GO:0022857		transmembrane transporter activity [GO:0022857]	integral component of membrane [GO:0016021]
		TRINITY_DN199_c0_g2_i3	Uncharacterized protein
		TRINITY_DN199_c0_g2_i8	Uncharacterized protein
		TRINITY_DN199_c0_g2_i1	Uncharacterized protein
		TRINITY_DN199_c0_g2_i7	Uncharacterized protein
		TRINITY_DN199_c0_g2_i2	Uncharacterized protein
		TRINITY_DN199_c0_g2_i6	Uncharacterized protein
		TRINITY_DN199_c0_g2_i4	Uncharacterized protein
		TRINITY_DN199_c0_g2_i5	Uncharacterized protein
		TRINITY_DN199_c4_g1_i1	NAD(P)H-quinone oxidoreductase subunit H, chloroplastic; NAD(P)H dehydrogenase, subunit H; NADH-plastoquinone oxidoreductase 49 kDa subunit; NADH-plastoquinone oxidoreductase subunit H	GO:0009535;GO:0051287;GO:0016655;GO:0048038;GO:0019684	photosynthesis, light reaction [GO:0019684]	NAD binding [GO:0051287];oxidoreductase activity, acting on NAD(P)H, quinone or similar compound as acceptor [GO:0016655];quinone binding [GO:0048038]	chloroplast thylakoid membrane [GO:0009535]
		TRINITY_DN111_c0_g1_i10	Uncharacterized protein	GO:0005524;GO:0051082;GO:0006457	protein folding [GO:0006457]	ATP binding [GO:0005524];unfolded protein binding [GO:0051082]
		TRINITY_DN111_c0_g1_i8	Uncharacterized protein	GO:0005524;GO:0051082;GO:0006457	protein folding [GO:0006457]	ATP binding [GO:0005524];unfolded protein binding [GO:0051082]
		TRINITY_DN111_c0_g1_i16	Uncharacterized protein	GO:0005524;GO:0051082;GO:0006457	protein folding [GO:0006457]	ATP binding [GO:0005524];unfolded protein binding [GO:0051082]
		TRINITY_DN111_c0_g1_i12	Uncharacterized protein	GO:0005524;GO:0051082;GO:0006457	protein folding [GO:0006457]	ATP binding [GO:0005524];unfolded protein binding [GO:0051082]
		TRINITY_DN111_c0_g1_i13	Uncharacterized protein	GO:0005524;GO:0051082;GO:0006457	protein folding [GO:0006457]	ATP binding [GO:0005524];unfolded protein binding [GO:0051082]
		TRINITY_DN111_c0_g1_i5	Uncharacterized protein	GO:0005524;GO:0051082;GO:0006457	protein folding [GO:0006457]	ATP binding [GO:0005524];unfolded protein binding [GO:0051082]
		TRINITY_DN111_c0_g1_i11	Uncharacterized protein	GO:0005524;GO:0051082;GO:0006457	protein folding [GO:0006457]	ATP binding [GO:0005524];unfolded protein binding [GO:0051082]
		TRINITY_DN111_c0_g1_i9	Uncharacterized protein	GO:0005524;GO:0051082;GO:0006457	protein folding [GO:0006457]	ATP binding [GO:0005524];unfolded protein binding [GO:0051082]
		TRINITY_DN111_c0_g1_i2	Uncharacterized protein	GO:0005524;GO:0051082;GO:0006457	protein folding [GO:0006457]	ATP binding [GO:0005524];unfolded protein binding [GO:0051082]
		TRINITY_DN111_c0_g1_i1	Uncharacterized protein	GO:0005524;GO:0051082;GO:0006457	protein folding [GO:0006457]	ATP binding [GO:0005524];unfolded protein binding [GO:0051082]
		TRINITY_DN111_c0_g1_i6	Uncharacterized protein	GO:0005524;GO:0051082;GO:0006457	protein folding [GO:0006457]	ATP binding [GO:0005524];unfolded protein binding [GO:0051082]
		TRINITY_DN111_c0_g1_i7	Uncharacterized protein	GO:0005524;GO:0051082;GO:0006457	protein folding [GO:0006457]	ATP binding [GO:0005524];unfolded protein binding [GO:0051082]
		TRINITY_DN111_c0_g1_i4	Uncharacterized protein	GO:0005524;GO:0051082;GO:0006457	protein folding [GO:0006457]	ATP binding [GO:0005524];unfolded protein binding [GO:0051082]
		TRINITY_DN111_c0_g1_i14	Uncharacterized protein	GO:0005524;GO:0051082;GO:0006457	protein folding [GO:0006457]	ATP binding [GO:0005524];unfolded protein binding [GO:0051082]
		TRINITY_DN111_c0_g2_i5	Uncharacterized protein
		TRINITY_DN111_c0_g2_i4	Uncharacterized protein
		TRINITY_DN111_c0_g2_i8	Uncharacterized protein
		TRINITY_DN111_c0_g2_i3	Uncharacterized protein
		TRINITY_DN111_c0_g2_i1	Uncharacterized protein
		TRINITY_DN111_c0_g2_i7	Uncharacterized protein
		TRINITY_DN111_c0_g2_i2	Uncharacterized protein
		TRINITY_DN111_c0_g2_i6	Uncharacterized protein
		TRINITY_DN111_c1_g1_i1	Uncharacterized protein
		TRINITY_DN111_c4_g1_i1	Uncharacterized protein
		TRINITY_DN134_c0_g1_i1	Uncharacterized protein
		TRINITY_DN134_c0_g1_i2	Uncharacterized protein
		TRINITY_DN134_c0_g1_i3	Uncharacterized protein
		TRINITY_DN134_c0_g1_i4	Uncharacterized protein
		TRINITY_DN103_c0_g1_i5	Uncharacterized protein
		TRINITY_DN103_c0_g1_i4	Uncharacterized protein
		TRINITY_DN103_c0_g1_i3	Uncharacterized protein
		TRINITY_DN103_c0_g1_i6	Uncharacterized protein
		TRINITY_DN103_c0_g1_i2	Uncharacterized protein
		TRINITY_DN103_c0_g1_i1	Uncharacterized protein
		TRINITY_DN103_c0_g2_i2	Uncharacterized protein
		TRINITY_DN103_c0_g2_i1	Uncharacterized protein
		TRINITY_DN103_c1_g2_i1	TBC1 domain family member 8B
		TRINITY_DN157_c0_g1_i9	Uncharacterized protein	GO:0009507			chloroplast [GO:0009507]
		TRINITY_DN157_c0_g1_i5	Uncharacterized protein	GO:0009507			chloroplast [GO:0009507]
		TRINITY_DN157_c0_g1_i8	Uncharacterized protein	GO:0009507			chloroplast [GO:0009507]
		TRINITY_DN157_c0_g1_i4	Chaperone protein dnaJ	GO:0009507			chloroplast [GO:0009507]
		TRINITY_DN157_c0_g1_i1	Chaperone protein dnaJ	GO:0009507			chloroplast [GO:0009507]
		TRINITY_DN157_c0_g1_i10	Chaperone protein dnaJ	GO:0009507			chloroplast [GO:0009507]
		TRINITY_DN157_c0_g1_i11	Uncharacterized protein	GO:0009507			chloroplast [GO:0009507]
		TRINITY_DN157_c0_g1_i7	Chaperone protein dnaJ	GO:0009507			chloroplast [GO:0009507]
		TRINITY_DN88615_c0_g1_i1	Uncharacterized protein	GO:0003676;GO:0015074	DNA integration [GO:0015074]	nucleic acid binding [GO:0003676]
		TRINITY_DN88615_c0_g2_i1	Uncharacterized protein
		TRINITY_DN88615_c0_g3_i1	Uncharacterized protein
		TRINITY_DN88615_c1_g1_i1	Uncharacterized protein
		TRINITY_DN88695_c0_g1_i1	Mono-and diacylglycerol lipase	GO:0008970;GO:0006629	lipid metabolic process [GO:0006629]	phosphatidylcholine 1-acylhydrolase activity [GO:0008970]
		TRINITY_DN88695_c0_g1_i3	Uncharacterized protein	GO:0008970;GO:0006629	lipid metabolic process [GO:0006629]	phosphatidylcholine 1-acylhydrolase activity [GO:0008970]
		TRINITY_DN88695_c0_g1_i2	Uncharacterized protein	GO:0008970;GO:0006629	lipid metabolic process [GO:0006629]	phosphatidylcholine 1-acylhydrolase activity [GO:0008970]
		TRINITY_DN88658_c0_g1_i1	Uncharacterized protein
		TRINITY_DN88658_c0_g2_i1	Uncharacterized protein
		TRINITY_DN88680_c0_g1_i3	Uncharacterized protein	GO:0016021			integral component of membrane [GO:0016021]
		TRINITY_DN88680_c0_g1_i6	DNA (Cytosine-5)-methyltransferase CMT2	GO:0005634;GO:0003682;GO:0008168		chromatin binding [GO:0003682];methyltransferase activity [GO:0008168]	nucleus [GO:0005634]
		TRINITY_DN88680_c0_g1_i1	Uncharacterized protein
		TRINITY_DN88680_c0_g1_i4	Uncharacterized protein
		TRINITY_DN88680_c0_g1_i2	Uncharacterized protein
		TRINITY_DN88680_c0_g2_i1	Uncharacterized protein
		TRINITY_DN88680_c4_g1_i1	Uncharacterized protein
		TRINITY_DN88670_c0_g1_i1	Uncharacterized protein
		TRINITY_DN88621_c0_g1_i1	Serine/threonine-protein kinase-like protein CCR4	GO:0016021;GO:0005524;GO:0004672		ATP binding [GO:0005524];protein kinase activity [GO:0004672]	integral component of membrane [GO:0016021]
		TRINITY_DN88639_c0_g1_i1	Nascent polypeptide-associated complex subunit beta	GO:0006355;GO:0006351	regulation of transcription, DNA-templated [GO:0006355];transcription, DNA-templated [GO:0006351]
		TRINITY_DN88608_c1_g1_i2	Uncharacterized protein
		TRINITY_DN88608_c1_g1_i1	Uncharacterized protein
		TRINITY_DN88622_c0_g1_i1	Uncharacterized protein
		TRINITY_DN88622_c0_g1_i2	Uncharacterized protein
		TRINITY_DN88633_c0_g1_i1	Uncharacterized protein	GO:0000166		nucleotide binding [GO:0000166]
		TRINITY_DN88665_c0_g1_i3	Uncharacterized protein	GO:0016021;GO:0005524;GO:0005509;GO:0030247;GO:0004672		ATP binding [GO:0005524];calcium ion binding [GO:0005509];polysaccharide binding [GO:0030247];protein kinase activity [GO:0004672]	integral component of membrane [GO:0016021]
		TRINITY_DN88665_c0_g1_i2	Uncharacterized protein	GO:0016021;GO:0005524;GO:0005509;GO:0030247;GO:0004672		ATP binding [GO:0005524];calcium ion binding [GO:0005509];polysaccharide binding [GO:0030247];protein kinase activity [GO:0004672]	integral component of membrane [GO:0016021]
		TRINITY_DN88665_c0_g1_i1	Uncharacterized protein	GO:0016021;GO:0005524;GO:0005509;GO:0030247;GO:0004672		ATP binding [GO:0005524];calcium ion binding [GO:0005509];polysaccharide binding [GO:0030247];protein kinase activity [GO:0004672]	integral component of membrane [GO:0016021]
		TRINITY_DN88665_c0_g2_i3	Uncharacterized protein	GO:0016021;GO:0005524;GO:0005509;GO:0004672		ATP binding [GO:0005524];calcium ion binding [GO:0005509];protein kinase activity [GO:0004672]	integral component of membrane [GO:0016021]
		TRINITY_DN88665_c0_g2_i2	Uncharacterized protein	GO:0016021;GO:0005524;GO:0005509;GO:0004672		ATP binding [GO:0005524];calcium ion binding [GO:0005509];protein kinase activity [GO:0004672]	integral component of membrane [GO:0016021]
		TRINITY_DN88665_c0_g2_i4	Uncharacterized protein	GO:0016021;GO:0005524;GO:0005509;GO:0030247;GO:0004672		ATP binding [GO:0005524];calcium ion binding [GO:0005509];polysaccharide binding [GO:0030247];protein kinase activity [GO:0004672]	integral component of membrane [GO:0016021]
		TRINITY_DN88665_c0_g2_i5	SnTox1 sensitivity protein	GO:0016021;GO:0005524;GO:0005509;GO:0030247;GO:0004672		ATP binding [GO:0005524];calcium ion binding [GO:0005509];polysaccharide binding [GO:0030247];protein kinase activity [GO:0004672]	integral component of membrane [GO:0016021]
		TRINITY_DN88665_c0_g2_i1	Uncharacterized protein	GO:0016021;GO:0005524;GO:0005509;GO:0004672		ATP binding [GO:0005524];calcium ion binding [GO:0005509];protein kinase activity [GO:0004672]	integral component of membrane [GO:0016021]
		TRINITY_DN88627_c0_g1_i1	Uncharacterized protein	GO:0016021;GO:0020037;GO:0005506;GO:0004497;GO:0016705		heme binding [GO:0020037];iron ion binding [GO:0005506];monooxygenase activity [GO:0004497];oxidoreductase activity, acting on paired donors, with incorporation or reduction of molecular oxygen [GO:0016705]	integral component of membrane [GO:0016021]
		TRINITY_DN88627_c0_g2_i2	Cytochrome P450 89A2	GO:0020037;GO:0005506;GO:0004497;GO:0016705		heme binding [GO:0020037];iron ion binding [GO:0005506];monooxygenase activity [GO:0004497];oxidoreductase activity, acting on paired donors, with incorporation or reduction of molecular oxygen [GO:0016705]
		TRINITY_DN88627_c1_g1_i1	Uncharacterized protein	GO:0016021;GO:0020037;GO:0005506;GO:0004497;GO:0016705		heme binding [GO:0020037];iron ion binding [GO:0005506];monooxygenase activity [GO:0004497];oxidoreductase activity, acting on paired donors, with incorporation or reduction of molecular oxygen [GO:0016705]	integral component of membrane [GO:0016021]
		TRINITY_DN88672_c0_g1_i1	Uncharacterized protein	GO:0016788		hydrolase activity, acting on ester bonds [GO:0016788]
		TRINITY_DN88607_c0_g1_i1	Uncharacterized protein
		TRINITY_DN88607_c0_g1_i3	Putative xyloglucan endotransglucosylase/hydrolase protein 32	GO:0004553;GO:0005975	carbohydrate metabolic process [GO:0005975]	hydrolase activity, hydrolyzing O-glycosyl compounds [GO:0004553]
		TRINITY_DN88607_c0_g1_i2	Putative xyloglucan endotransglucosylase/hydrolase protein 32	GO:0004553;GO:0005975	carbohydrate metabolic process [GO:0005975]	hydrolase activity, hydrolyzing O-glycosyl compounds [GO:0004553]
		TRINITY_DN88607_c0_g2_i1	Uncharacterized protein
		TRINITY_DN88607_c1_g1_i1	Putative xyloglucan endotransglucosylase/hydrolase protein 32	GO:0004553;GO:0005975	carbohydrate metabolic process [GO:0005975]	hydrolase activity, hydrolyzing O-glycosyl compounds [GO:0004553]
		TRINITY_DN88673_c0_g1_i3	Uncharacterized protein
		TRINITY_DN88673_c0_g1_i1	Uncharacterized protein
		TRINITY_DN88673_c0_g1_i2	Uncharacterized protein	GO:0004252		serine-type endopeptidase activity [GO:0004252]
		TRINITY_DN88659_c0_g1_i1	Uncharacterized protein
		TRINITY_DN88647_c1_g1_i1	Uncharacterized protein	GO:0043531		ADP binding [GO:0043531]
		TRINITY_DN88642_c0_g1_i1	Uncharacterized protein
		TRINITY_DN88620_c0_g1_i1	Coronin
		TRINITY_DN88686_c0_g1_i2	Uncharacterized protein	GO:0003723		RNA binding [GO:0003723]
		TRINITY_DN88686_c0_g1_i1	Uncharacterized protein	GO:0003723		RNA binding [GO:0003723]
		TRINITY_DN88640_c0_g1_i1	Uncharacterized protein	GO:0005524;GO:0004672;GO:0006950	response to stress [GO:0006950]	ATP binding [GO:0005524];protein kinase activity [GO:0004672]
		TRINITY_DN88602_c0_g1_i2	Uncharacterized protein	GO:0016021;GO:0022857		transmembrane transporter activity [GO:0022857]	integral component of membrane [GO:0016021]
		TRINITY_DN88602_c0_g1_i1	Uncharacterized protein	GO:0016021;GO:0022857		transmembrane transporter activity [GO:0022857]	integral component of membrane [GO:0016021]
		TRINITY_DN88602_c0_g1_i3	Cysteine-rich receptor-like protein kinase 25	GO:0016021;GO:0005524;GO:0004672		ATP binding [GO:0005524];protein kinase activity [GO:0004672]	integral component of membrane [GO:0016021]
		TRINITY_DN88602_c0_g1_i5	Uncharacterized protein	GO:0016021;GO:0022857		transmembrane transporter activity [GO:0022857]	integral component of membrane [GO:0016021]
		TRINITY_DN88602_c0_g2_i4	Hexose carrier	GO:0016021;GO:0022857		transmembrane transporter activity [GO:0022857]	integral component of membrane [GO:0016021]
		TRINITY_DN88602_c0_g2_i3	Hexose carrier	GO:0016021;GO:0022857		transmembrane transporter activity [GO:0022857]	integral component of membrane [GO:0016021]
		TRINITY_DN88602_c0_g2_i5	Hexose carrier	GO:0016021;GO:0022857		transmembrane transporter activity [GO:0022857]	integral component of membrane [GO:0016021]
		TRINITY_DN88602_c0_g2_i2	Hexose carrier	GO:0016021;GO:0022857		transmembrane transporter activity [GO:0022857]	integral component of membrane [GO:0016021]
		TRINITY_DN88602_c0_g2_i1	Hexose carrier	GO:0016021;GO:0022857		transmembrane transporter activity [GO:0022857]	integral component of membrane [GO:0016021]
		TRINITY_DN88624_c0_g1_i2	Disease resistance protein RPM1	GO:0043531		ADP binding [GO:0043531]
		TRINITY_DN88624_c0_g1_i1	Uncharacterized protein	GO:0043531		ADP binding [GO:0043531]
		TRINITY_DN88629_c0_g1_i1	Uncharacterized protein	GO:0003676;GO:0008270		nucleic acid binding [GO:0003676];zinc ion binding [GO:0008270]
		TRINITY_DN88629_c0_g2_i1	Uncharacterized protein	GO:0003676;GO:0008270		nucleic acid binding [GO:0003676];zinc ion binding [GO:0008270]
		TRINITY_DN88661_c0_g1_i2	Uncharacterized protein
		TRINITY_DN88661_c0_g1_i1	Uncharacterized protein
		TRINITY_DN88626_c0_g1_i2	rRNA N-glycosidase	GO:0030598;GO:0090729;GO:0006952;GO:0017148	defense response [GO:0006952];negative regulation of translation [GO:0017148]	rRNA N-glycosylase activity [GO:0030598];toxin activity [GO:0090729]
		TRINITY_DN88626_c0_g1_i1	rRNA N-glycosidase	GO:0030598;GO:0090729;GO:0006952;GO:0017148	defense response [GO:0006952];negative regulation of translation [GO:0017148]	rRNA N-glycosylase activity [GO:0030598];toxin activity [GO:0090729]
		TRINITY_DN88683_c0_g1_i2	Uncharacterized protein	GO:0016021;GO:0003684;GO:0008534;GO:0006289	nucleotide-excision repair [GO:0006289]	damaged DNA binding [GO:0003684];oxidized purine nucleobase lesion DNA N-glycosylase activity [GO:0008534]	integral component of membrane [GO:0016021]
		TRINITY_DN88683_c0_g2_i1	Uncharacterized protein	GO:0016021;GO:0003684;GO:0008534;GO:0006289	nucleotide-excision repair [GO:0006289]	damaged DNA binding [GO:0003684];oxidized purine nucleobase lesion DNA N-glycosylase activity [GO:0008534]	integral component of membrane [GO:0016021]
		TRINITY_DN88663_c0_g1_i8	Protein REVEILLE 6	GO:0005634;GO:0003677;GO:0003700;GO:0042752;GO:0009737;GO:0046686;GO:0009723;GO:0009739;GO:0009753;GO:0009751;GO:0009651;GO:0006351	regulation of circadian rhythm [GO:0042752];response to abscisic acid [GO:0009737];response to cadmium ion [GO:0046686];response to ethylene [GO:0009723];response to gibberellin [GO:0009739];response to jasmonic acid [GO:0009753];response to salicylic acid [GO:0009751];response to salt stress [GO:0009651];transcription, DNA-templated [GO:0006351]	DNA binding [GO:0003677];DNA binding transcription factor activity [GO:0003700]	nucleus [GO:0005634]
		TRINITY_DN88663_c0_g1_i5	Protein REVEILLE 6	GO:0005634;GO:0003677;GO:0003700;GO:0042752;GO:0009737;GO:0046686;GO:0009723;GO:0009739;GO:0009753;GO:0009751;GO:0009651;GO:0006351	regulation of circadian rhythm [GO:0042752];response to abscisic acid [GO:0009737];response to cadmium ion [GO:0046686];response to ethylene [GO:0009723];response to gibberellin [GO:0009739];response to jasmonic acid [GO:0009753];response to salicylic acid [GO:0009751];response to salt stress [GO:0009651];transcription, DNA-templated [GO:0006351]	DNA binding [GO:0003677];DNA binding transcription factor activity [GO:0003700]	nucleus [GO:0005634]
		TRINITY_DN88663_c0_g1_i6	Protein REVEILLE 6	GO:0005634;GO:0003677;GO:0003700;GO:0042752;GO:0009737;GO:0046686;GO:0009723;GO:0009739;GO:0009753;GO:0009751;GO:0009651;GO:0006351	regulation of circadian rhythm [GO:0042752];response to abscisic acid [GO:0009737];response to cadmium ion [GO:0046686];response to ethylene [GO:0009723];response to gibberellin [GO:0009739];response to jasmonic acid [GO:0009753];response to salicylic acid [GO:0009751];response to salt stress [GO:0009651];transcription, DNA-templated [GO:0006351]	DNA binding [GO:0003677];DNA binding transcription factor activity [GO:0003700]	nucleus [GO:0005634]
		TRINITY_DN88663_c0_g1_i3	Protein REVEILLE 6	GO:0005634;GO:0003677;GO:0003700;GO:0042752;GO:0009737;GO:0046686;GO:0009723;GO:0009739;GO:0009753;GO:0009751;GO:0009651;GO:0006351	regulation of circadian rhythm [GO:0042752];response to abscisic acid [GO:0009737];response to cadmium ion [GO:0046686];response to ethylene [GO:0009723];response to gibberellin [GO:0009739];response to jasmonic acid [GO:0009753];response to salicylic acid [GO:0009751];response to salt stress [GO:0009651];transcription, DNA-templated [GO:0006351]	DNA binding [GO:0003677];DNA binding transcription factor activity [GO:0003700]	nucleus [GO:0005634]
		TRINITY_DN88603_c0_g1_i1	Uncharacterized protein
		TRINITY_DN88603_c0_g1_i2	Uncharacterized protein
		TRINITY_DN88603_c0_g1_i3	Uncharacterized protein
		TRINITY_DN88605_c0_g1_i3	Uncharacterized protein	GO:0019905		syntaxin binding [GO:0019905]
		TRINITY_DN88605_c0_g1_i5	Uncharacterized protein	GO:0019905		syntaxin binding [GO:0019905]
		TRINITY_DN88605_c0_g1_i1	Uncharacterized protein	GO:0019905		syntaxin binding [GO:0019905]
		TRINITY_DN88605_c1_g1_i1	Uncharacterized protein	GO:0019905		syntaxin binding [GO:0019905]
		TRINITY_DN88605_c2_g1_i1	Uncharacterized protein	GO:0019905		syntaxin binding [GO:0019905]
		TRINITY_DN88636_c0_g1_i1	Wall-associated receptor kinase-like 14	GO:0005524;GO:0004672		ATP binding [GO:0005524];protein kinase activity [GO:0004672]
		TRINITY_DN88635_c0_g1_i1	Uncharacterized protein	GO:0016021			integral component of membrane [GO:0016021]
		TRINITY_DN88697_c0_g1_i1	Uncharacterized protein
		TRINITY_DN88697_c0_g2_i3	BTB/POZ and MATH domain-containing protein 1
		TRINITY_DN88697_c0_g2_i1	BTB/POZ and MATH domain-containing protein 1
		TRINITY_DN88697_c1_g1_i1	Uncharacterized protein
		TRINITY_DN88697_c1_g1_i3	Uncharacterized protein
		TRINITY_DN88697_c1_g2_i1	Uncharacterized protein
		TRINITY_DN88669_c0_g1_i3	Proteasome subunit alpha type	GO:0005737;GO:0005634;GO:0019773;GO:0004298;GO:0006511	ubiquitin-dependent protein catabolic process [GO:0006511]	threonine-type endopeptidase activity [GO:0004298]	cytoplasm [GO:0005737];nucleus [GO:0005634];proteasome core complex, alpha-subunit complex [GO:0019773]
		TRINITY_DN88693_c0_g1_i1	Uncharacterized protein	GO:0043531		ADP binding [GO:0043531]
		TRINITY_DN88677_c0_g1_i5	Uncharacterized protein
		TRINITY_DN88677_c0_g1_i3	Uncharacterized protein
		TRINITY_DN88677_c0_g2_i1	Uncharacterized protein
		TRINITY_DN88677_c0_g2_i2	Uncharacterized protein
		TRINITY_DN88677_c0_g2_i3	Uncharacterized protein
		TRINITY_DN88674_c0_g1_i1	Germin-like protein 5-1	GO:0005576;GO:0030145;GO:0045735		manganese ion binding [GO:0030145];nutrient reservoir activity [GO:0045735]	extracellular region [GO:0005576]
		TRINITY_DN88688_c0_g1_i1	Uncharacterized protein	GO:0006355	regulation of transcription, DNA-templated [GO:0006355]
		TRINITY_DN88657_c0_g1_i1	Uncharacterized protein	GO:0016021			integral component of membrane [GO:0016021]
		TRINITY_DN88698_c0_g1_i1	Uncharacterized protein
		TRINITY_DN88698_c2_g1_i1	Uncharacterized protein
		TRINITY_DN88698_c2_g1_i2	Uncharacterized protein
		TRINITY_DN88662_c0_g1_i1	Uncharacterized protein	GO:0005634;GO:0003677;GO:0006355;GO:0006351	regulation of transcription, DNA-templated [GO:0006355];transcription, DNA-templated [GO:0006351]	DNA binding [GO:0003677]	nucleus [GO:0005634]
		TRINITY_DN88662_c0_g1_i2	Uncharacterized protein	GO:0005634;GO:0003677;GO:0006355;GO:0006351	regulation of transcription, DNA-templated [GO:0006355];transcription, DNA-templated [GO:0006351]	DNA binding [GO:0003677]	nucleus [GO:0005634]
		TRINITY_DN88671_c0_g2_i2	Putative serine/threonine-protein kinase	GO:0016021;GO:0005524;GO:0004674		ATP binding [GO:0005524];protein serine/threonine kinase activity [GO:0004674]	integral component of membrane [GO:0016021]
		TRINITY_DN88671_c0_g2_i4	Putative serine/threonine-protein kinase	GO:0016021;GO:0005524;GO:0004674		ATP binding [GO:0005524];protein serine/threonine kinase activity [GO:0004674]	integral component of membrane [GO:0016021]
		TRINITY_DN88645_c0_g1_i2	Uncharacterized protein
		TRINITY_DN88685_c0_g1_i1	Uncharacterized protein
		TRINITY_DN88601_c0_g1_i1	Uncharacterized protein
		TRINITY_DN88601_c0_g2_i1	Uncharacterized protein
		TRINITY_DN88691_c0_g1_i1	Uncharacterized protein	GO:0003676;GO:0015074	DNA integration [GO:0015074]	nucleic acid binding [GO:0003676]
		TRINITY_DN88691_c0_g2_i3	Uncharacterized protein	GO:0003676;GO:0015074	DNA integration [GO:0015074]	nucleic acid binding [GO:0003676]
		TRINITY_DN88691_c0_g2_i4	Uncharacterized protein	GO:0003676;GO:0008270;GO:0015074	DNA integration [GO:0015074]	nucleic acid binding [GO:0003676];zinc ion binding [GO:0008270]
		TRINITY_DN88691_c0_g2_i1	Uncharacterized protein	GO:0003676;GO:0015074	DNA integration [GO:0015074]	nucleic acid binding [GO:0003676]
		TRINITY_DN88691_c0_g3_i5	Uncharacterized protein	GO:0003676;GO:0015074	DNA integration [GO:0015074]	nucleic acid binding [GO:0003676]
		TRINITY_DN88691_c0_g3_i2	Uncharacterized protein	GO:0003676;GO:0015074	DNA integration [GO:0015074]	nucleic acid binding [GO:0003676]
		TRINITY_DN88691_c0_g3_i3	Uncharacterized protein	GO:0003676;GO:0015074	DNA integration [GO:0015074]	nucleic acid binding [GO:0003676]
		TRINITY_DN88691_c0_g3_i1	Uncharacterized protein	GO:0003676;GO:0015074	DNA integration [GO:0015074]	nucleic acid binding [GO:0003676]
		TRINITY_DN88691_c0_g4_i1	Uncharacterized protein	GO:0003676;GO:0015074	DNA integration [GO:0015074]	nucleic acid binding [GO:0003676]
		TRINITY_DN88691_c2_g1_i2	Uncharacterized protein	GO:0003676;GO:0015074	DNA integration [GO:0015074]	nucleic acid binding [GO:0003676]
		TRINITY_DN88691_c2_g1_i1	Uncharacterized protein	GO:0003676;GO:0015074	DNA integration [GO:0015074]	nucleic acid binding [GO:0003676]
		TRINITY_DN88691_c3_g1_i1	Uncharacterized protein	GO:0003676;GO:0015074	DNA integration [GO:0015074]	nucleic acid binding [GO:0003676]
		TRINITY_DN88691_c4_g1_i1	Uncharacterized protein	GO:0003676;GO:0015074	DNA integration [GO:0015074]	nucleic acid binding [GO:0003676]
		TRINITY_DN88691_c5_g1_i1	Uncharacterized protein	GO:0003676;GO:0015074	DNA integration [GO:0015074]	nucleic acid binding [GO:0003676]
		TRINITY_DN88641_c0_g1_i2	Transcription initiation factor IIE subunit beta	GO:0005634;GO:0003677;GO:0006355;GO:0006367	regulation of transcription, DNA-templated [GO:0006355];transcription initiation from RNA polymerase II promoter [GO:0006367]	DNA binding [GO:0003677]	nucleus [GO:0005634]
		TRINITY_DN88641_c0_g1_i1	Transcription initiation factor IIE subunit beta	GO:0005634;GO:0003677;GO:0006355;GO:0006367	regulation of transcription, DNA-templated [GO:0006355];transcription initiation from RNA polymerase II promoter [GO:0006367]	DNA binding [GO:0003677]	nucleus [GO:0005634]
		TRINITY_DN88606_c0_g1_i1	Uncharacterized protein	GO:0016021;GO:0005524;GO:0004222;GO:0008270		ATP binding [GO:0005524];metalloendopeptidase activity [GO:0004222];zinc ion binding [GO:0008270]	integral component of membrane [GO:0016021]
		TRINITY_DN88696_c0_g1_i1	S-adenosylmethionine synthase	GO:0005524;GO:0046872;GO:0004478;GO:0006730;GO:0006556	one-carbon metabolic process [GO:0006730];S-adenosylmethionine biosynthetic process [GO:0006556]	ATP binding [GO:0005524];metal ion binding [GO:0046872];methionine adenosyltransferase activity [GO:0004478]
		TRINITY_DN88689_c0_g1_i1	Histone H2B.6; H2B123	GO:0000786;GO:0005634;GO:0003677;GO:0046982		DNA binding [GO:0003677];protein heterodimerization activity [GO:0046982]	nucleosome [GO:0000786];nucleus [GO:0005634]
		TRINITY_DN88612_c0_g1_i2	Peptide transporter PTR5	GO:0016021;GO:0022857;GO:0006857	oligopeptide transport [GO:0006857]	transmembrane transporter activity [GO:0022857]	integral component of membrane [GO:0016021]
		TRINITY_DN88612_c0_g1_i4	Uncharacterized protein	GO:0016021;GO:0022857;GO:0006857	oligopeptide transport [GO:0006857]	transmembrane transporter activity [GO:0022857]	integral component of membrane [GO:0016021]
		TRINITY_DN88612_c0_g1_i3	Peptide transporter PTR5	GO:0016021;GO:0022857;GO:0006857	oligopeptide transport [GO:0006857]	transmembrane transporter activity [GO:0022857]	integral component of membrane [GO:0016021]
		TRINITY_DN88612_c0_g1_i1	Peptide transporter PTR5	GO:0016021;GO:0022857;GO:0006857	oligopeptide transport [GO:0006857]	transmembrane transporter activity [GO:0022857]	integral component of membrane [GO:0016021]
		TRINITY_DN88612_c1_g1_i1	Uncharacterized protein	GO:0016021;GO:0022857		transmembrane transporter activity [GO:0022857]	integral component of membrane [GO:0016021]
		TRINITY_DN88646_c1_g1_i1	Uncharacterized protein
		TRINITY_DN88664_c0_g1_i1	Acryloyl-CoA reductase (NADH)	GO:0050660;GO:0016627		flavin adenine dinucleotide binding [GO:0050660];oxidoreductase activity, acting on the CH-CH group of donors [GO:0016627]
		TRINITY_DN88664_c0_g2_i1	Acyl-CoA dehydrogenase	GO:0050660;GO:0016627		flavin adenine dinucleotide binding [GO:0050660];oxidoreductase activity, acting on the CH-CH group of donors [GO:0016627]
		TRINITY_DN88609_c0_g1_i1	Uncharacterized protein	GO:0006355	regulation of transcription, DNA-templated [GO:0006355]
		TRINITY_DN88609_c0_g3_i1	Uncharacterized protein	GO:0006355	regulation of transcription, DNA-templated [GO:0006355]
		TRINITY_DN88609_c0_g4_i1	Uncharacterized protein	GO:0006355	regulation of transcription, DNA-templated [GO:0006355]
		TRINITY_DN88609_c0_g4_i2	Uncharacterized protein	GO:0006355	regulation of transcription, DNA-templated [GO:0006355]
		TRINITY_DN88609_c0_g5_i1	Uncharacterized protein	GO:0008270;GO:0006355	regulation of transcription, DNA-templated [GO:0006355]	zinc ion binding [GO:0008270]
		TRINITY_DN88638_c0_g1_i1	Glutaredoxin-C3	GO:0005623;GO:0009055;GO:0015035;GO:0045454	cell redox homeostasis [GO:0045454]	electron transfer activity [GO:0009055];protein disulfide oxidoreductase activity [GO:0015035]	cell [GO:0005623]
		TRINITY_DN57058_c0_g1_i1	Uncharacterized protein	GO:0043531		ADP binding [GO:0043531]
		TRINITY_DN57075_c0_g2_i1	Uncharacterized protein	GO:0030234		enzyme regulator activity [GO:0030234]
		TRINITY_DN57035_c0_g1_i3	Callose synthase 2	GO:0005524;GO:0004672		ATP binding [GO:0005524];protein kinase activity [GO:0004672]
		TRINITY_DN57035_c0_g1_i4	Callose synthase 2	GO:0005524;GO:0004672		ATP binding [GO:0005524];protein kinase activity [GO:0004672]
		TRINITY_DN57078_c0_g1_i2	Uncharacterized protein
		TRINITY_DN57078_c0_g1_i3	Vesicle-associated membrane protein-associated protein A	GO:0005789			endoplasmic reticulum membrane [GO:0005789]
		TRINITY_DN57078_c0_g1_i1	Uncharacterized protein
		TRINITY_DN57078_c0_g1_i4	Vesicle-associated membrane protein-associated protein A	GO:0005789			endoplasmic reticulum membrane [GO:0005789]
		TRINITY_DN57095_c0_g1_i2	Uncharacterized protein
		TRINITY_DN57095_c0_g1_i1	Uncharacterized protein	GO:0016021			integral component of membrane [GO:0016021]
		TRINITY_DN57096_c0_g1_i1	Uncharacterized protein	GO:0008198;GO:0016701;GO:0008270;GO:0006725	cellular aromatic compound metabolic process [GO:0006725]	ferrous iron binding [GO:0008198];oxidoreductase activity, acting on single donors with incorporation of molecular oxygen [GO:0016701];zinc ion binding [GO:0008270]
		TRINITY_DN57086_c0_g1_i1	Uncharacterized protein	GO:0016021;GO:0016746;GO:0008152	metabolic process [GO:0008152]	transferase activity, transferring acyl groups [GO:0016746]	integral component of membrane [GO:0016021]
		TRINITY_DN57082_c0_g1_i1	Uncharacterized protein
		TRINITY_DN57013_c0_g1_i3	Uncharacterized protein	GO:0016021;GO:0015297;GO:0015238		antiporter activity [GO:0015297];drug transmembrane transporter activity [GO:0015238]	integral component of membrane [GO:0016021]
		TRINITY_DN57013_c0_g1_i7	Protein DETOXIFICATION; Multidrug and toxic compound extrusion protein	GO:0016021;GO:0015297;GO:0015238		antiporter activity [GO:0015297];drug transmembrane transporter activity [GO:0015238]	integral component of membrane [GO:0016021]
		TRINITY_DN57013_c0_g1_i1	Uncharacterized protein	GO:0016021;GO:0015297;GO:0015238		antiporter activity [GO:0015297];drug transmembrane transporter activity [GO:0015238]	integral component of membrane [GO:0016021]
		TRINITY_DN57013_c0_g1_i8	Uncharacterized protein	GO:0016021;GO:0015297;GO:0015238		antiporter activity [GO:0015297];drug transmembrane transporter activity [GO:0015238]	integral component of membrane [GO:0016021]
		TRINITY_DN57013_c0_g1_i2	Protein DETOXIFICATION; Multidrug and toxic compound extrusion protein	GO:0016021;GO:0015297;GO:0015238		antiporter activity [GO:0015297];drug transmembrane transporter activity [GO:0015238]	integral component of membrane [GO:0016021]
		TRINITY_DN57013_c0_g1_i5	Uncharacterized protein	GO:0016021;GO:0015297;GO:0015238		antiporter activity [GO:0015297];drug transmembrane transporter activity [GO:0015238]	integral component of membrane [GO:0016021]
		TRINITY_DN57029_c0_g1_i6	Uncharacterized protein
		TRINITY_DN57029_c0_g1_i5	Uncharacterized protein
		TRINITY_DN57029_c0_g1_i4	Uncharacterized protein	GO:0016021			integral component of membrane [GO:0016021]
		TRINITY_DN57029_c0_g1_i2	Uncharacterized protein
		TRINITY_DN57029_c0_g1_i7	Uncharacterized protein
		TRINITY_DN57022_c0_g1_i1	Aspartic proteinase nepenthesin-1	GO:0004190		aspartic-type endopeptidase activity [GO:0004190]
		TRINITY_DN57034_c0_g1_i2	Uncharacterized protein	GO:0016021			integral component of membrane [GO:0016021]
		TRINITY_DN57034_c0_g1_i1	Uncharacterized protein	GO:0016021			integral component of membrane [GO:0016021]
		TRINITY_DN57019_c0_g1_i5	Uncharacterized protein	GO:0004252		serine-type endopeptidase activity [GO:0004252]
		TRINITY_DN57019_c0_g1_i2	Uncharacterized protein	GO:0004252		serine-type endopeptidase activity [GO:0004252]
		TRINITY_DN57019_c0_g1_i7	Uncharacterized protein	GO:0004252		serine-type endopeptidase activity [GO:0004252]
		TRINITY_DN57019_c0_g1_i9	Uncharacterized protein	GO:0004252		serine-type endopeptidase activity [GO:0004252]
		TRINITY_DN57019_c0_g1_i8	Uncharacterized protein	GO:0004252		serine-type endopeptidase activity [GO:0004252]
		TRINITY_DN57019_c0_g1_i4	Uncharacterized protein	GO:0004252		serine-type endopeptidase activity [GO:0004252]
		TRINITY_DN57019_c0_g1_i6	Uncharacterized protein	GO:0004252		serine-type endopeptidase activity [GO:0004252]
		TRINITY_DN57019_c0_g1_i1	Uncharacterized protein	GO:0004252		serine-type endopeptidase activity [GO:0004252]
		TRINITY_DN57019_c0_g1_i3	Uncharacterized protein	GO:0004252		serine-type endopeptidase activity [GO:0004252]
		TRINITY_DN57019_c0_g1_i10	Uncharacterized protein	GO:0004252		serine-type endopeptidase activity [GO:0004252]
		TRINITY_DN57093_c0_g1_i1	Uncharacterized protein
		TRINITY_DN57093_c0_g1_i2	Uncharacterized protein
		TRINITY_DN57085_c0_g1_i1	Uncharacterized protein	GO:0005694;GO:0003677;GO:0003917;GO:0006265	DNA topological change [GO:0006265]	DNA binding [GO:0003677];DNA topoisomerase type I activity [GO:0003917]	chromosome [GO:0005694]
		TRINITY_DN57090_c0_g1_i2	Uncharacterized protein	GO:0020037;GO:0005506;GO:0004497;GO:0016705		heme binding [GO:0020037];iron ion binding [GO:0005506];monooxygenase activity [GO:0004497];oxidoreductase activity, acting on paired donors, with incorporation or reduction of molecular oxygen [GO:0016705]
[truncated: 360,511+ more rows]
