# Supplementary material for: Insight into the mechanisms of terminal HS-tolerance in wheat mutant with improved nutritional quality through de novo transcriptome sequencing
Source: Research Square preprint supplement (doi:10.21203/rs.3.rs-241832/v1), 2021-02-26
Supplement: Supplementary file 18 [file 52d5fbec4fb5a2f01a1f0b22.xlsx]

## Sheet: Sheet1
		Insight into the mechanisms of terminal HS-tolerance in wheat mutant with improved nutritional quality through de novo transcriptome sequencing Ranjeet R. Kumar, Suman Bakshi, Kavita Dubey, Sumedha Hasija, Gyanendra K. Rai, Neelu Jain, Sanjay Jambhulkar, Bhupinder Singh, Gyanendra P. Singh, & Shelly Praveen
		Table S12 List of differentially expressed transcripts showing similarity with Transcription Factors (TFs) in wheat mutant identified using de novo transcriptomic approach
		Trinity_GeneID	logFC	PValue	FDR	Wheat_Transcript_ID	Transcript_Start	Transcript_End	Transcript length	E value	Wheat_Gene_ID	Chromosome	Gene_Start	Gene_End	Description/Protein Name
		TRINITY_DN15834_c0_g2	17.3232	1.44e-38	9.55e-36	TraesCS7A01G360400.1	1	214	1077	2.44e-99	TraesCS7A01G360400	chr7A	533995324	533996694	Heat shock transcription factor family protein
		TRINITY_DN26865_c3_g1	14.4156	3.65e-19	4.26e-17	TraesCS7B01G267300.1	617	932	1062	1.15e-142	TraesCS7B01G267300	chr7B	490432075	490433223	Heat shock transcription factor
		TRINITY_DN133181_c4_g1	13.361	2.64e-53	6.59e-50	TraesCS5A01G383800.1	931	741	1119	5.41e-85	TraesCS5A01G383800	chr5A	581487008	581488298	Heat shock transcription factor
		TRINITY_DN301_c0_g1	12.9879	1.36e-44	1.51e-41	TraesCS7B01G267300.1	322	1062	1062	0	TraesCS7B01G267300	chr7B	490432075	490433223	Heat shock transcription factor
		TRINITY_DN4476_c1_g2	12.3508	2.22e-34	1.05e-31	TraesCS2B01G127800.1	1	184	606	1.23e-92	TraesCS2B01G127800	chr2B	95796218	95796941	Ethylene-responsive transcription factor
		TRINITY_DN36949_c0_g2	11.6729	6.06e-49	1.04e-45	TraesCS2A01G524600.1	1	582	582	2.95e-165	TraesCS2A01G524600	chr2A	745388709	745389290	Ethylene-responsive transcription factor, putative
		TRINITY_DN26865_c1_g1	11.4895	1.09e-21	1.68e-19	TraesCS7B01G267300.1	341	663	1062	1.47e-166	TraesCS7B01G267300	chr7B	490432075	490433223	Heat shock transcription factor
		TRINITY_DN18464_c0_g1	10.6863	6.36e-13	3.31e-11	TraesCS3D01G067900.1	2073	1431	2073	0	TraesCS3D01G067900	chr3D	29951188	29953260	Scarecrow transcription factor family protein
		TRINITY_DN139419_c0_g1	10.6729	5.92e-22	9.38e-20	TraesCS1A01G375600.1	256	49	1089	1.65e-104	TraesCS1A01G375600	chr1A	550311989	550314347	Heat shock transcription factor
		TRINITY_DN19974_c0_g2	10.6506	1.16e-21	1.77e-19	TraesCS7A01G397800.1	429	354	429	1.37e-22	TraesCS7A01G397800	chr7A	576957871	576961268	MADS box transcription factor
		TRINITY_DN105870_c0_g1	10.4517	6.63e-20	8.57e-18	TraesCS1D01G142900.1	444	566	582	9.9e-39	TraesCS1D01G142900	chr1D	198172390	198172971	Ethylene-responsive transcription factor, putative
		TRINITY_DN46592_c0_g3	10.4352	9.44e-20	1.18e-17	TraesCS2B01G246300.1	342	121	342	1.44e-39	TraesCS2B01G246300	chr2B	250725322	250725815	Transcription elongation factor 1
		TRINITY_DN84781_c0_g1	10.3454	1.07e-14	7.27e-13	TraesCS1A01G076200.1	1	344	975	5.48e-178	TraesCS1A01G076200	chr1A	58946424	58947663	MYB transcription factor
		TRINITY_DN32279_c0_g2	10.2257	8.33e-10	2.46e-08	TraesCS3A01G259900.1	807	604	1128	5.8e-104	TraesCS3A01G259900	chr3A	482183259	482184743	AP2/B3 transcription factor family protein
		TRINITY_DN41584_c0_g1	10.0001	1.87e-09	5.18e-08	TraesCS2D01G109200.1	1	149	753	3.15e-73	TraesCS2D01G109200	chr2D	60760396	60761148	GATA transcription factor-like protein
		TRINITY_DN37726_c2_g1	9.95511	5.31e-07	8.46e-06	TraesCS7A01G270100.1	1094	880	1125	3.66e-106	TraesCS7A01G270100	chr7A	276184867	276186319	Heat shock transcription factor
		TRINITY_DN133181_c5_g1	9.90166	7.66e-13	3.9e-11	TraesCS5D01G393200.1	1134	946	1134	4.23e-82	TraesCS5D01G393200	chr5D	461439693	461440998	Heat shock transcription factor
		TRINITY_DN26865_c4_g1	9.85984	1.8e-14	1.18e-12	TraesCS7A01G360400.1	906	1077	1077	2.05e-54	TraesCS7A01G360400	chr7A	533995324	533996694	Heat shock transcription factor family protein
		TRINITY_DN2854_c0_g2	9.85686	1.06e-09	3.07e-08	TraesCS2D01G399000.1	846	454	915	0	TraesCS2D01G399000	chr2D	512042264	512043264	Heat shock transcription factor
		TRINITY_DN47465_c0_g2	9.81492	2.38e-11	9.4e-10	TraesCS7B01G296800.1	3	64	729	6.53e-25	TraesCS7B01G296800	chr7B	533567633	533571023	PLATZ transcription factor family protein
		TRINITY_DN94705_c0_g2	9.80979	3.64e-15	2.63e-13	TraesCS2A01G109800.1	321	97	585	6.38e-114	TraesCS2A01G109800	chr2A	61488106	61488797	Ethylene-responsive transcription factor
		TRINITY_DN2489_c4_g2	9.71591	2.86e-13	1.57e-11	TraesCS1D01G142900.1	1	486	582	7.37e-107	TraesCS1D01G142900	chr1D	198172390	198172971	Ethylene-responsive transcription factor, putative
		TRINITY_DN41185_c0_g1	9.6681	1.94e-11	7.81e-10	TraesCS5A01G383800.1	49	260	1119	4.78e-90	TraesCS5A01G383800	chr5A	581487008	581488298	Heat shock transcription factor
		TRINITY_DN11509_c0_g2	9.42827	8.72e-31	3.06e-28	TraesCS4A01G005600.1	951	753	951	8.87e-97	TraesCS4A01G005600	chr4A	3370277	3371723	Ethylene-responsive transcription factor
		TRINITY_DN108410_c0_g1	9.19107	2.58e-07	4.47e-06	TraesCS7D01G458000.1	679	745	1026	8.94e-28	TraesCS7D01G458000	chr7D	575945655	575955076	MYB-related transcription factor
		TRINITY_DN115593_c0_g1	9.13753	1e-10	3.53e-09	TraesCS2D01G300700.1	174	383	786	6.07e-94	TraesCS2D01G300700	chr2D	383093295	383094080	Ethylene-responsive transcription factor
		TRINITY_DN64720_c0_g1	8.83329	7.01e-07	1.08e-05	TraesCS7D01G423600.1	1	861	861	0	TraesCS7D01G423600	chr7D	543731888	543732748	Transcription elongation factor (TFIIS) family protein
		TRINITY_DN72544_c1_g1	8.82716	2.97e-08	6.4e-07	TraesCS3B01G135500.1	627	418	1629	1.29e-105	TraesCS3B01G135500	chr3B	118136625	118138253	Transcription factor, putative
		TRINITY_DN164804_c0_g1	8.75832	1.25e-07	2.34e-06	TraesCS3B01G039100.1	829	1040	1056	4.68e-105	TraesCS3B01G039100	chr3B	18846649	18847805	MYB transcription factor
		TRINITY_DN103215_c0_g1	8.63189	1.71e-07	3.12e-06	TraesCS5A01G532500.1	6154	6202	6597	1.17e-17	TraesCS5A01G532500	chr5A	690182076	690192585	Mediator of RNA polymerase II transcription subunit 12
		TRINITY_DN56840_c0_g1	8.55963	7.06e-16	5.6e-14	TraesCS5A01G314700.1	1146	1189	1191	1.54e-14	TraesCS5A01G314700	chr5A	525078041	525079362	Heat shock transcription factor
		TRINITY_DN155141_c0_g1	8.49401	3.55e-07	5.94e-06	TraesCS4B01G299400.1	247	114	942	7.97e-65	TraesCS4B01G299400	chr4B	585821448	585823018	Ethylene-responsive transcription factor
		TRINITY_DN106712_c0_g1	8.36877	2.31e-06	3.09e-05	TraesCS5A01G207000.1	2692	2750	4224	2.29e-23	TraesCS5A01G207000	chr5A	417883499	417896290	Transcription initiation factor TFIID subunit 2
		TRINITY_DN133181_c3_g1	8.323	1.58e-38	1.04e-35	TraesCS5A01G383800.1	524	373	1119	3.86e-67	TraesCS5A01G383800	chr5A	581487008	581488298	Heat shock transcription factor
		TRINITY_DN94705_c0_g1	8.3199	3.81e-22	6.17e-20	TraesCS2D01G110000.1	1	320	600	4.32e-163	TraesCS2D01G110000	chr2D	61021556	61022267	Ethylene-responsive transcription factor
		TRINITY_DN32930_c0_g1	8.30549	2.24e-19	2.69e-17	TraesCS2D01G300700.1	506	786	786	1.86e-129	TraesCS2D01G300700	chr2D	383093295	383094080	Ethylene-responsive transcription factor
		TRINITY_DN8435_c1_g1	7.91315	8.87e-12	3.75e-10	TraesCS4A01G163100.1	1771	1547	2514	5.92e-71	TraesCS4A01G163100	chr4A	363080324	363122005	Transcription initiation factor TFIID subunit 4b
		TRINITY_DN1205_c0_g1	7.76111	4.48e-36	2.41e-33	TraesCS5D01G393200.1	993	1134	1134	2.24e-67	TraesCS5D01G393200	chr5D	461439693	461440998	Heat shock transcription factor
		TRINITY_DN4476_c1_g1	7.73589	2.84e-24	5.44e-22	TraesCS2D01G110000.1	1	162	600	1.73e-80	TraesCS2D01G110000	chr2D	61021556	61022267	Ethylene-responsive transcription factor
		TRINITY_DN43593_c1_g1	7.57451	6.09e-21	8.67e-19	TraesCS2A01G269600.1	1	318	318	5.97e-152	TraesCS2A01G269600	chr2A	435641621	435642033	BHLH transcription factor
		TRINITY_DN7861_c0_g2	7.57369	8.61e-20	1.09e-17	TraesCS4B01G299500.1	951	253	951	0	TraesCS4B01G299500	chr4B	585963224	585964442	Ethylene-responsive transcription factor
		TRINITY_DN1190_c0_g1	7.33553	1.5e-34	7.18e-32	TraesCS2A01G109800.1	232	585	585	0	TraesCS2A01G109800	chr2A	61488106	61488797	Ethylene-responsive transcription factor
		TRINITY_DN3766_c1_g2	7.2055	4.41e-08	9.19e-07	TraesCS5A01G314600.1	487	270	615	2.25e-103	TraesCS5A01G314600	chr5A	525025891	525026586	Ethylene-responsive transcription factor
		TRINITY_DN23320_c0_g1	7.16625	4.71e-21	6.77e-19	TraesCS2D01G106000.1	491	1	825	1.09e-113	TraesCS2D01G106000	chr2D	57264904	57265728	Transcription repressor ofp17
		TRINITY_DN10255_c0_g2	7.01517	1.15e-06	1.68e-05	TraesCS2D01G105600.1	649	426	831	1.63e-33	TraesCS2D01G105600	chr2D	57146684	57147514	transcription repressor
		TRINITY_DN4786_c0_g2	6.91651	6.96e-11	2.53e-09	TraesCS1D01G382900.1	151	1	1095	3.01e-74	TraesCS1D01G382900	chr1D	457849896	457852204	Heat shock transcription factor
		TRINITY_DN133181_c0_g1	6.84614	6.95e-40	5.39e-37	TraesCS5D01G393200.1	319	593	1134	5.95e-140	TraesCS5D01G393200	chr5D	461439693	461440998	Heat shock transcription factor
		TRINITY_DN13481_c0_g4	6.83594	2.18e-17	2.1e-15	TraesCS5D01G320800.1	239	1	597	3.2e-123	TraesCS5D01G320800	chr5D	412960326	412961366	Ethylene-responsive transcription factor
		TRINITY_DN2947_c1_g1	6.57072	3.2e-13	1.74e-11	TraesCS6D01G187300.1	458	1	972	0	TraesCS6D01G187300	chr6D	251230646	251241109	Basic-leucine zipper (bZIP) transcription factor family protein
		TRINITY_DN2854_c0_g1	6.37071	1.38e-24	2.7e-22	TraesCS2D01G399000.1	214	915	915	0	TraesCS2D01G399000	chr2D	512042264	512043264	Heat shock transcription factor
		TRINITY_DN9550_c2_g2	6.33189	6.47e-16	5.15e-14	TraesCS5A01G176500.1	231	273	300	3.57e-07	TraesCS5A01G176500	chr5A	371031555	371032032	MYB-related transcription factor
		TRINITY_DN253676_c0_g1	6.2278	1.09e-05	0.000122045	TraesCS7A01G397800.1	321	403	429	9.34e-13	TraesCS7A01G397800	chr7A	576957871	576961268	MADS box transcription factor
		TRINITY_DN4385_c2_g2	6.12635	4.19e-11	1.59e-09	TraesCS7D01G330500.1	380	1	600	3.86e-99	TraesCS7D01G330500	chr7D	422153081	422153680	Ethylene-responsive transcription factor
		TRINITY_DN3766_c1_g1	6.1131	1.15e-33	5.19e-31	TraesCS5A01G314600.1	208	615	615	0	TraesCS5A01G314600	chr5A	525025891	525026586	Ethylene-responsive transcription factor
		TRINITY_DN72943_c0_g2	6.05205	1.27e-13	7.31e-12	TraesCS4D01G339100.1	6	355	744	0	TraesCS4D01G339100	chr4D	497126030	497126958	MYB transcription factor
		TRINITY_DN36941_c1_g3	6.00993	1.36e-07	2.53e-06	TraesCS6A01G203200.1	501	561	972	8.92e-24	TraesCS6A01G203200	chr6A	344179339	344190674	Basic-leucine zipper (bZIP) transcription factor family protein
		TRINITY_DN13481_c0_g2	5.92515	2.78e-09	7.41e-08	TraesCS5D01G320800.1	1	121	597	2.11e-57	TraesCS5D01G320800	chr5D	412960326	412961366	Ethylene-responsive transcription factor
		TRINITY_DN10366_c0_g2	5.9002	1.75e-16	1.51e-14	TraesCS2A01G401600.1	1	214	888	2.48e-109	TraesCS2A01G401600	chr2A	655218650	655219623	Heat stress transcription factor
		TRINITY_DN21219_c1_g1	5.79001	1.47e-13	8.36e-12	TraesCS4B01G344000.1	405	741	741	5.62e-169	TraesCS4B01G344000	chr4B	637621778	637622676	MYB transcription factor
		TRINITY_DN62214_c0_g1	5.78882	1.35e-09	3.85e-08	TraesCS7D01G330500.1	124	471	600	3.99e-82	TraesCS7D01G330500	chr7D	422153081	422153680	Ethylene-responsive transcription factor
		TRINITY_DN7192_c1_g1	5.78474	2.13e-10	7.08e-09	TraesCS1A01G076200.1	361	598	975	1.88e-119	TraesCS1A01G076200	chr1A	58946424	58947663	MYB transcription factor
		TRINITY_DN43258_c0_g1	5.72289	9.94e-08	1.91e-06	TraesCS6A01G204300.2	15	45	681	9.39e-08	TraesCS6A01G204300	chr6A	355398725	355408051	Transcription factor protein
		TRINITY_DN88292_c0_g2	5.50752	3.29e-05	0.000330135	TraesCS2A01G401600.1	87	1	888	2.33e-38	TraesCS2A01G401600	chr2A	655218650	655219623	Heat stress transcription factor
		TRINITY_DN35073_c0_g3	5.43484	8.52e-06	9.85e-05	TraesCS3D01G371900.1	568	643	753	1.98e-32	TraesCS3D01G371900	chr3D	485069490	485072294	Transcription factor
		TRINITY_DN32550_c0_g1	5.36933	1.3e-10	4.51e-09	TraesCS7D01G174100.1	1440	1696	2109	1.2e-131	TraesCS7D01G174100	chr7D	126505194	126507302	Scarecrow transcription factor family protein
		TRINITY_DN98017_c0_g1	5.32141	5.6e-06	6.83e-05	TraesCS5D01G070300.1	324	1	429	8.31e-96	TraesCS5D01G070300	chr5D	68211016	68211511	Transcription repressor OFP4
		TRINITY_DN23322_c0_g2	5.14416	1.22e-11	5.08e-10	TraesCS3A01G044700.1	1	1041	1041	0	TraesCS3A01G044700	chr3A	24037088	24038485	MYB transcription factor
		TRINITY_DN72544_c0_g1	5.13719	5.06e-06	6.23e-05	TraesCS3A01G116400.1	337	606	1605	3.54e-132	TraesCS3A01G116400	chr3A	84649308	84650912	Transcription factor, putative
		TRINITY_DN28000_c0_g2	5.03224	0.000174514	0.00147533	TraesCS5A01G237900.1	256	318	897	1.53e-25	TraesCS5A01G237900	chr5A	454397096	454401145	Heat stress transcription factor
		TRINITY_DN4786_c0_g1	4.99947	1.43e-17	1.4e-15	TraesCS1D01G382900.1	1	186	1095	9.1e-92	TraesCS1D01G382900	chr1D	457849896	457852204	Heat shock transcription factor
		TRINITY_DN87709_c0_g1	4.99621	3.53e-14	2.21e-12	TraesCS1A01G416600.1	29	1	270	6.34e-06	TraesCS1A01G416600	chr1A	574934591	574935614	Transcription elongation factor 1
		TRINITY_DN176393_c0_g1	4.94301	2.6e-11	1.02e-09	TraesCS3D01G118300.1	1491	1178	1491	7.33e-165	TraesCS3D01G118300	chr3D	72252014	72253630	Transcription factor, putative
		TRINITY_DN2903_c0_g1	4.92463	7.16e-20	9.15e-18	TraesCS1A01G375600.2	255	1107	1107	0	TraesCS1A01G375600	chr1A	550311989	550314347	Heat shock transcription factor
		TRINITY_DN24066_c0_g1	4.88463	3.27e-06	4.21e-05	TraesCS1B01G094500.1	480	981	981	0	TraesCS1B01G094500	chr1B	96488255	96489494	MYB transcription factor
		TRINITY_DN87830_c0_g1	4.87602	0.00020713	0.0017127	TraesCS6B01G220300.1	184	57	897	9.89e-60	TraesCS6B01G220300	chr6B	313150513	313165965	Transcription factor protein
		TRINITY_DN18060_c0_g1	4.86643	1.48e-07	2.73e-06	TraesCS3A01G259900.1	1	126	1128	7.77e-51	TraesCS3A01G259900	chr3A	482183259	482184743	AP2/B3 transcription factor family protein
		TRINITY_DN10235_c0_g1	4.85648	3.47e-22	5.66e-20	TraesCS7A01G355500.1	132	750	750	0	TraesCS7A01G355500	chr7A	520563404	520564446	ethylene-responsive transcription factor
		TRINITY_DN25277_c0_g1	4.75902	7.27e-10	2.18e-08	TraesCS7B01G168300.1	62	135	978	6.15e-30	TraesCS7B01G168300	chr7B	235448977	235450208	Heat stress transcription factor
		TRINITY_DN8349_c0_g3	4.75326	6.83e-16	5.43e-14	TraesCS1D01G382900.1	560	337	1095	1.07e-111	TraesCS1D01G382900	chr1D	457849896	457852204	Heat shock transcription factor
		TRINITY_DN268_c1_g1	4.73332	1.68e-10	5.66e-09	TraesCS7A01G270100.1	271	1	1125	2.56e-140	TraesCS7A01G270100	chr7A	276184867	276186319	Heat shock transcription factor
		TRINITY_DN5683_c0_g1	4.71905	1.25e-24	2.45e-22	TraesCS3A01G116400.1	498	1605	1605	0	TraesCS3A01G116400	chr3A	84649308	84650912	Transcription factor, putative
		TRINITY_DN60965_c0_g3	4.67055	2.45e-11	9.65e-10	TraesCS7D01G174300.1	346	81	2190	3.14e-133	TraesCS7D01G174300	chr7D	126681685	126683874	Scarecrow transcription factor family protein
		TRINITY_DN8187_c0_g2	4.58648	1.73e-15	1.3e-13	TraesCS7B01G162100.1	333	78	675	2.83e-132	TraesCS7B01G162100	chr7B	222313349	222314598	Ethylene-responsive transcription factor
		TRINITY_DN38923_c1_g2	4.56671	4.87e-09	1.24e-07	TraesCS2A01G142800.1	1227	1299	1725	8.1e-31	TraesCS2A01G142800	chr2A	88009109	88012911	BZIP transcription factor
		TRINITY_DN139419_c0_g2	4.54367	9.26e-13	4.64e-11	TraesCS1D01G382900.1	45	337	1095	3.1e-148	TraesCS1D01G382900	chr1D	457849896	457852204	Heat shock transcription factor
		TRINITY_DN16097_c0_g1	4.52787	2.65e-12	1.23e-10	TraesCS2D01G096000.1	286	987	987	0	TraesCS2D01G096000	chr2D	48133084	48134070	MYB transcription factor
		TRINITY_DN90405_c0_g2	4.52177	7.73e-07	1.18e-05	TraesCS7D01G147100.1	357	495	495	2.62e-67	TraesCS7D01G147100	chr7D	93948421	93949453	Ethylene-responsive transcription factor
		TRINITY_DN3368_c0_g1	4.49374	2.32e-08	5.12e-07	TraesCS1A01G375600.1	275	339	1089	6.78e-23	TraesCS1A01G375600	chr1A	550311989	550314347	Heat shock transcription factor
		TRINITY_DN101228_c0_g1	4.46256	0.000294866	0.00233582	TraesCS4D01G268700.1	348	1	390	1.02e-114	TraesCS4D01G268700	chr4D	439772798	439773187	Ethylene-responsive transcription factor
		TRINITY_DN14769_c2_g1	4.41752	5.11e-09	1.29e-07	TraesCS4D01G276500.1	313	1	1026	2.31e-160	TraesCS4D01G276500	chr4D	447639020	447641302	Heat shock transcription factor
		TRINITY_DN104650_c0_g1	4.35568	4.23e-08	8.84e-07	TraesCS4B01G299400.1	127	1	942	6.18e-61	TraesCS4B01G299400	chr4B	585821448	585823018	Ethylene-responsive transcription factor
		TRINITY_DN4063_c0_g1	4.35025	1e-17	9.92e-16	TraesCS4B01G278100.1	229	924	1026	0	TraesCS4B01G278100	chr4B	560012716	560014885	Heat shock transcription factor
		TRINITY_DN57730_c0_g1	4.31235	0.000356442	0.00275438	TraesCS6D01G298100.2	275	151	1065	2.13e-39	TraesCS6D01G298100	chr6D	408945513	408946711	Myb transcription factor
		TRINITY_DN34770_c0_g1	4.30047	5.41e-05	0.00051835	TraesCS3D01G329400.1	98	2	1770	1.65e-26	TraesCS3D01G329400	chr3D	442169382	442175781	MYB transcription factor
		TRINITY_DN56300_c0_g1	4.26501	2.11e-09	5.77e-08	TraesCS4D01G326100.1	1	245	369	3.44e-123	TraesCS4D01G326100	chr4D	485952605	485952973	Transcription activator-like protein
		TRINITY_DN62214_c0_g2	4.23393	3.11e-09	8.2e-08	TraesCS2A01G524600.1	1	386	582	2.23e-151	TraesCS2A01G524600	chr2A	745388709	745389290	Ethylene-responsive transcription factor, putative
		TRINITY_DN57146_c0_g1	4.20698	1.88e-12	8.91e-11	TraesCS3D01G118300.1	1137	894	1491	4.12e-126	TraesCS3D01G118300	chr3D	72252014	72253630	Transcription factor, putative
		TRINITY_DN29939_c0_g1	4.20512	1.61e-10	5.47e-09	TraesCS2A01G097200.1	1	231	981	8.78e-119	TraesCS2A01G097200	chr2A	51007674	51008654	MYB transcription factor
		TRINITY_DN43026_c0_g1	4.16417	3.28e-12	1.5e-10	TraesCS4A01G005800.1	1	831	831	0	TraesCS4A01G005800	chr4A	3387764	3388594	Ethylene-responsive transcription factor
		TRINITY_DN23322_c0_g1	4.15378	4.96e-10	1.54e-08	TraesCS2B01G112600.1	172	391	999	8.05e-113	TraesCS2B01G112600	chr2B	75847392	75848390	MYB transcription factor
		TRINITY_DN200350_c0_g1	4.12531	1.24e-09	3.57e-08	TraesCS4A01G027700.1	232	313	1026	2.65e-34	TraesCS4A01G027700	chr4A	19620363	19622625	Heat shock transcription factor
		TRINITY_DN69699_c0_g1	4.08796	3.75e-05	0.000372739	TraesCS7A01G509000.1	979	1047	1047	1.93e-18	TraesCS7A01G509000	chr7A	696722297	696723462	WRKY transcription factor
		TRINITY_DN79874_c0_g1	4.07724	4.32e-05	0.000422982	TraesCS6B01G220300.1	131	184	897	2.58e-20	TraesCS6B01G220300	chr6B	313150513	313165965	Transcription factor protein
		TRINITY_DN60965_c0_g1	4.00214	8.92e-11	3.17e-09	TraesCS7A01G173000.1	7	381	2247	0	TraesCS7A01G173000	chr7A	127607258	127609504	Scarecrow transcription factor family protein
		TRINITY_DN15501_c0_g1	3.96222	1.79e-12	8.56e-11	TraesCS7B01G296800.1	374	441	729	3.23e-27	TraesCS7B01G296800	chr7B	533567633	533571023	PLATZ transcription factor family protein
		TRINITY_DN8004_c0_g1	3.92041	5.69e-11	2.1e-09	TraesCS4A01G027700.1	1	115	1026	1.93e-52	TraesCS4A01G027700	chr4A	19620363	19622625	Heat shock transcription factor
		TRINITY_DN8349_c0_g1	3.90954	2.42e-08	5.32e-07	TraesCS1B01G396000.2	2	174	951	3.86e-75	TraesCS1B01G396000	chr1B	627926916	627929186	Heat shock transcription factor
		TRINITY_DN268_c0_g1	3.90677	2.55e-17	2.43e-15	TraesCS7B01G168300.2	268	1125	1125	0	TraesCS7B01G168300	chr7B	235448977	235450208	Heat shock transcription factor
		TRINITY_DN6009_c0_g1	3.87793	2.63e-13	1.45e-11	TraesCS7D01G174300.1	67	2171	2190	0	TraesCS7D01G174300	chr7D	126681685	126683874	Scarecrow transcription factor family protein
		TRINITY_DN10366_c0_g3	3.82596	7.8e-13	3.96e-11	TraesCS7A01G270100.1	1	317	1125	1.59e-159	TraesCS7A01G270100	chr7A	276184867	276186319	Heat shock transcription factor
		TRINITY_DN67694_c0_g1	3.80257	5.25e-11	1.95e-09	TraesCS4A01G027700.1	540	756	1026	1.72e-109	TraesCS4A01G027700	chr4A	19620363	19622625	Heat shock transcription factor
		TRINITY_DN8187_c0_g3	3.78532	0.00862489	0.0400047	TraesCS7A01G264100.1	85	1	684	1.65e-37	TraesCS7A01G264100	chr7A	262473773	262475099	Ethylene-responsive transcription factor
		TRINITY_DN82292_c0_g1	3.77771	0.0126708	0.0540424	TraesCS5B01G304700.1	100	354	579	3.45e-107	TraesCS5B01G304700	chr5B	488719379	488719957	Ethylene-responsive transcription factor
		TRINITY_DN79391_c0_g1	3.73957	1.96e-07	3.5e-06	TraesCS4D01G298400.1	131	399	948	1.3e-131	TraesCS4D01G298400	chr4D	467635222	467636744	Ethylene-responsive transcription factor
		TRINITY_DN34054_c0_g1	3.73238	1.64e-07	3e-06	TraesCS2D01G203400.1	100	372	372	9.54e-142	TraesCS2D01G203400	chr2D	155506499	155506870	Transcription factor jumonji (jmjC) domain-containing protein
		TRINITY_DN104923_c0_g1	3.72866	0.0107411	0.0476008	TraesCS5A01G261500.1	643	701	963	3.48e-23	TraesCS5A01G261500	chr5A	475312797	475321702	bZIP transcription factor, putative (DUF1664)
		TRINITY_DN85284_c0_g3	3.71738	1.25e-23	2.29e-21	TraesCS7D01G367500.1	1	225	750	3.4e-112	TraesCS7D01G367500	chr7D	475375095	475375844	ethylene-responsive transcription factor
		TRINITY_DN16494_c0_g1	3.66201	3.16e-09	8.35e-08	TraesCS4A01G027700.1	313	510	1026	2.07e-100	TraesCS4A01G027700	chr4A	19620363	19622625	Heat shock transcription factor
		TRINITY_DN52116_c2_g1	3.64516	0.000214344	0.00176173	TraesCS6B01G424600.1	844	689	1296	8.31e-74	TraesCS6B01G424600	chr6B	694117113	694119596	Myb-like transcription factor family protein
		TRINITY_DN37726_c1_g1	3.64054	2.41e-11	9.5e-10	TraesCS7A01G270100.1	569	271	1125	6.46e-155	TraesCS7A01G270100	chr7A	276184867	276186319	Heat shock transcription factor
		TRINITY_DN37726_c0_g1	3.6348	2.62e-14	1.68e-12	TraesCS7B01G168300.1	775	390	978	0	TraesCS7B01G168300	chr7B	235448977	235450208	Heat stress transcription factor
		TRINITY_DN90613_c0_g1	3.61135	0.000135269	0.00117781	TraesCS5B01G396600.1	185	229	735	1.72e-15	TraesCS5B01G396600	chr5B	573803238	573815903	MADS box transcription factor
		TRINITY_DN8187_c0_g1	3.59346	6.7e-15	4.66e-13	TraesCS7A01G264100.1	1	154	684	1.24e-72	TraesCS7A01G264100	chr7A	262473773	262475099	Ethylene-responsive transcription factor
		TRINITY_DN12902_c0_g4	3.57279	4.5e-10	1.41e-08	TraesCS2D01G146100.1	1288	1347	1719	5.36e-23	TraesCS2D01G146100	chr2D	87753303	87757102	BZIP transcription factor
		TRINITY_DN16416_c0_g1	3.56373	2.02e-12	9.55e-11	TraesCS6A01G292300.1	1	421	708	0	TraesCS6A01G292300	chr6A	524304843	524312602	AGAMOUS-like MADS-box transcription factor
		TRINITY_DN94237_c0_g1	3.54999	0.000636591	0.00454564	TraesCS3B01G412500.1	1	335	1161	5.32e-176	TraesCS3B01G412500	chr3B	648745943	648749214	Ethylene-responsive transcription factor
		TRINITY_DN151750_c0_g1	3.52758	1.73e-09	4.82e-08	TraesCS4B01G299400.1	655	380	942	7.68e-144	TraesCS4B01G299400	chr4B	585821448	585823018	Ethylene-responsive transcription factor
		TRINITY_DN78630_c0_g1	3.50633	0.00172679	0.0106428	TraesCS3D01G371900.1	671	728	753	2.04e-22	TraesCS3D01G371900	chr3D	485069490	485072294	Transcription factor
		TRINITY_DN95981_c0_g3	3.49057	0.0255174	0.0928495	TraesCS7A01G397800.1	321	429	429	2.1e-44	TraesCS7A01G397800	chr7A	576957871	576961268	MADS box transcription factor
		TRINITY_DN12902_c0_g3	3.44806	1.76e-07	3.18e-06	TraesCS2D01G146100.1	1288	1347	1719	4.55e-23	TraesCS2D01G146100	chr2D	87753303	87757102	BZIP transcription factor
		TRINITY_DN88663_c0_g1	3.42179	3.86e-05	0.000381993	TraesCS7A01G470700.1	207	280	1023	2.48e-29	TraesCS7A01G470700	chr7A	666807556	666812030	MYB-related transcription factor
		TRINITY_DN28000_c0_g1	3.41667	7.44e-05	0.000692215	TraesCS5A01G237900.1	191	256	897	1.06e-26	TraesCS5A01G237900	chr5A	454397096	454401145	Heat stress transcription factor
		TRINITY_DN7009_c0_g2	3.38027	5.2e-07	8.3e-06	TraesCS3B01G323800.1	111	214	1326	6.77e-48	TraesCS3B01G323800	chr3B	524325411	524327639	Heat shock transcription factor
		TRINITY_DN11509_c0_g1	3.37236	7.3e-15	5.06e-13	TraesCS4B01G299400.1	697	942	942	2.15e-123	TraesCS4B01G299400	chr4B	585821448	585823018	Ethylene-responsive transcription factor
		TRINITY_DN55262_c0_g1	3.33674	0.00156626	0.00980616	TraesCS1B01G125700.1	58	226	1641	2.13e-84	TraesCS1B01G125700	chr1B	152797719	152801372	CCR4-NOT transcription complex subunit 1
		TRINITY_DN12445_c1_g1	3.30074	0.00336025	0.0185544	TraesCS2A01G287600.1	436	162	1017	2.75e-143	TraesCS2A01G287600	chr2A	490662152	490665462	Trihelix transcription factor
		TRINITY_DN10577_c0_g2	3.27922	4.1e-08	8.59e-07	TraesCS7B01G162100.1	675	402	675	1.61e-142	TraesCS7B01G162100	chr7B	222313349	222314598	Ethylene-responsive transcription factor
		TRINITY_DN1600_c0_g1	3.246	9.31e-19	1.04e-16	TraesCS6A01G292300.2	710	545	726	6.59e-80	TraesCS6A01G292300	chr6A	524304843	524312602	AGAMOUS-like MADS-box transcription factor
		TRINITY_DN29992_c0_g1	3.24069	4.21e-06	5.3e-05	TraesCS2D01G211400.1	871	1071	1500	2.65e-102	TraesCS2D01G211400	chr2D	168597082	168599706	Heat shock transcription factor
		TRINITY_DN10451_c0_g2	3.23291	1.69e-10	5.7e-09	TraesCS5B01G315600.2	1200	304	1200	0	TraesCS5B01G315600	chr5B	497755104	497758068	Heat shock transcription factor
		TRINITY_DN84894_c0_g1	3.22908	1.08e-05	0.000120964	TraesCS7B01G078300.1	787	982	2217	9.94e-96	TraesCS7B01G078300	chr7B	88245247	88247463	Scarecrow transcription factor family protein
		TRINITY_DN52871_c0_g2	3.22138	0.000143288	0.00124041	TraesCS2A01G162600.2	254	323	432	9.64e-28	TraesCS2A01G162600	chr2A	115114212	115117059	Transcription elongation factor SPT4 homolog
		TRINITY_DN13421_c0_g1	3.21357	4.15e-14	2.58e-12	TraesCS3B01G293000.1	672	1152	1152	0	TraesCS3B01G293000	chr3B	471799767	471801255	AP2/B3 transcription factor family protein
		TRINITY_DN66590_c0_g1	3.19705	1.02e-05	0.000115894	TraesCS3A01G434900.1	414	317	504	1.76e-44	TraesCS3A01G434900	chr3A	676886114	676905903	MADS-box transcription factor
		TRINITY_DN10451_c0_g1	3.16472	7.62e-13	3.88e-11	TraesCS5D01G321000.1	1	303	1194	2.6e-158	TraesCS5D01G321000	chr5D	413057751	413059074	Heat shock transcription factor
		TRINITY_DN121549_c0_g1	3.15657	0.00108474	0.00715885	TraesCS2A01G097500.1	176	204	1002	6.04e-06	TraesCS2A01G097500	chr2A	51493887	51499389	transcription factor-like protein
		TRINITY_DN11509_c0_g3	3.14406	2.38e-09	6.43e-08	TraesCS4B01G299500.1	651	951	951	5.25e-156	TraesCS4B01G299500	chr4B	585963224	585964442	Ethylene-responsive transcription factor
		TRINITY_DN11066_c0_g1	3.08997	1.9e-05	0.000200848	TraesCS3A01G073200.1	335	1079	1803	0	TraesCS3A01G073200	chr3A	45564302	45567980	transcription factor, putative (Protein of unknown function, DUF547)
		TRINITY_DN41293_c0_g1	3.07026	7.14e-10	2.14e-08	TraesCS7A01G488600.2	155	319	756	3.67e-80	TraesCS7A01G488600	chr7A	678969517	678971043	Basic-leucine zipper (BZIP) transcription factor family
		TRINITY_DN5727_c0_g2	3.00582	0.000124979	0.0010968	TraesCS4D01G341700.1	669	505	669	2.08e-81	TraesCS4D01G341700	chr4D	498384553	498397991	MADS-box transcription factor
		TRINITY_DN47465_c0_g1	2.98781	6.56e-12	2.85e-10	TraesCS7B01G296800.1	3	64	729	9.63e-25	TraesCS7B01G296800	chr7B	533567633	533571023	PLATZ transcription factor family protein
		TRINITY_DN69197_c1_g2	2.95765	4.24e-06	5.32e-05	TraesCS6A01G021800.1	1	33	969	9.44e-09	TraesCS6A01G021800	chr6A	10923513	10924481	Mitochondrial transcription termination factor-like
		TRINITY_DN27654_c0_g2	2.95002	1.82e-07	3.29e-06	TraesCS2A01G510500.1	2	330	330	4.76e-129	TraesCS2A01G510500	chr2A	735697437	735697766	bZIP transcription factor family protein
		TRINITY_DN16781_c0_g3	2.94363	0.000263733	0.00212028	TraesCS2D01G269000.1	1185	1	1185	0	TraesCS2D01G269000	chr2D	330736978	330738162	Transcriptional adapter 1
		TRINITY_DN60592_c0_g1	2.93996	7.39e-05	0.000687932	TraesCS7A01G116000.1	1	144	1134	1.83e-70	TraesCS7A01G116000	chr7A	74158259	74160811	WRKY family transcription factor
		TRINITY_DN10577_c0_g1	2.93823	6.08e-07	9.53e-06	TraesCS7A01G264100.1	247	684	684	0	TraesCS7A01G264100	chr7A	262473773	262475099	Ethylene-responsive transcription factor
		TRINITY_DN18012_c0_g1	2.90632	1.86e-08	4.2e-07	TraesCS3D01G372900.1	651	1149	1149	0	TraesCS3D01G372900	chr3D	486050063	486052480	Ethylene-responsive transcription factor
		TRINITY_DN49745_c0_g1	2.88012	0.000480636	0.00356475	TraesCS5A01G420200.1	837	913	1263	1.39e-31	TraesCS5A01G420200	chr5A	606893553	606895479	Basic helix-loop-helix transcription factor
		TRINITY_DN21535_c0_g5	2.86863	2.57e-05	0.000264521	TraesCS5A01G217900.1	111	372	930	2.04e-134	TraesCS5A01G217900	chr5A	436089024	436090329	MYB-related transcription factor
		TRINITY_DN30945_c0_g1	2.85555	0.000146888	0.00126838	TraesCS3B01G407700.1	342	491	531	2.72e-70	TraesCS3B01G407700	chr3B	643256656	643257634	MYB transcription factor
		TRINITY_DN21978_c0_g1	2.85396	0.000228423	0.00186533	TraesCS3B01G411300.1	609	672	753	5.9e-24	TraesCS3B01G411300	chr3B	647820086	647822817	Transcription factor
		TRINITY_DN24266_c0_g2	2.84991	0.000514602	0.0037819	TraesCS5A01G237900.1	256	313	897	1.3e-21	TraesCS5A01G237900	chr5A	454397096	454401145	Heat stress transcription factor
		TRINITY_DN11508_c0_g2	2.80478	7.73e-06	9.04e-05	TraesCS5A01G391700.1	185	238	735	3.54e-19	TraesCS5A01G391700	chr5A	587411824	587423240	MADS box transcription factor
		TRINITY_DN2282_c0_g2	2.71252	1.45e-13	8.25e-12	TraesCS7B01G296800.1	1	729	729	0	TraesCS7B01G296800	chr7B	533567633	533571023	PLATZ transcription factor family protein
		TRINITY_DN26471_c0_g1	2.70598	0.000308028	0.00242699	TraesCS5D01G401500.1	602	656	765	5.41e-21	TraesCS5D01G401500	chr5D	467176608	467184463	MADS box transcription factor
		TRINITY_DN18002_c0_g2	2.67533	0.000390637	0.00298276	TraesCS1D01G313900.1	1050	277	1176	0	TraesCS1D01G313900	chr1D	409058292	409064532	Mitochondrial transcription termination factor family protein, putative
		TRINITY_DN13549_c0_g1	2.65683	2.58e-09	6.94e-08	TraesCS7A01G394800.1	314	586	729	1.65e-135	TraesCS7A01G394800	chr7A	573094075	573097485	PLATZ transcription factor family protein
		TRINITY_DN60022_c0_g1	2.6259	0.000562792	0.0040893	TraesCS6D01G192700.1	1	128	462	1.77e-61	TraesCS6D01G192700	chr6D	266783327	266783788	Mediator of RNA polymerase II transcription subunit 13, putative
		TRINITY_DN2410_c0_g1	2.59713	1.02e-07	1.95e-06	TraesCS2B01G167900.1	1	1713	1713	0	TraesCS2B01G167900	chr2B	140843989	140847191	BZIP transcription factor
		TRINITY_DN19598_c0_g1	2.57527	0.00146099	0.009242	TraesCS6A01G243100.1	280	1701	1701	0	TraesCS6A01G243100	chr6A	454679847	454681656	bZIP transcription factor (DUF630 and DUF632)
		TRINITY_DN37715_c0_g1	2.55394	0.000708168	0.00498535	TraesCS5B01G259800.1	122	175	963	3.94e-20	TraesCS5B01G259800	chr5B	442372604	442377101	bZIP transcription factor, putative (DUF1664)
		TRINITY_DN100225_c0_g1	2.53273	0.0116512	0.0506977	TraesCS4B01G176800.1	1286	1351	2442	5.72e-27	TraesCS4B01G176800	chr4B	387376822	387382704	bZIP transcription factor (DUF630 and DUF632)
		TRINITY_DN13764_c1_g2	2.53104	0.00160031	0.00997984	TraesCS5A01G043300.1	26	81	429	6.76e-21	TraesCS5A01G043300	chr5A	39733250	39737626	Nuclear transcription factor Y subunit
		TRINITY_DN64119_c0_g1	2.52351	0.00344458	0.0189324	TraesCS6B01G071500.1	1	165	3327	3.67e-82	TraesCS6B01G071500	chr6B	48347592	48354272	SPOC domain/transcription elongation factor S-II, putative
		TRINITY_DN35554_c2_g1	2.50135	0.00356053	0.0194678	TraesCS6D01G136200.1	167	1	1047	3.49e-83	TraesCS6D01G136200	chr6D	104453755	104455299	WRKY transcription factor
		TRINITY_DN20899_c0_g1	2.5	0.00216776	0.0128513	TraesCS6A01G333600.1	946	869	1023	1.19e-32	TraesCS6A01G333600	chr6A	564716150	564720056	BZIP transcription factor
		TRINITY_DN43774_c0_g2	2.48632	0.00413342	0.0220183	TraesCS2D01G096800.1	1	117	1002	8.06e-55	TraesCS2D01G096800	chr2D	49196269	49201826	transcription factor-like protein
		TRINITY_DN38356_c0_g1	2.45764	7.79e-08	1.53e-06	TraesCS6A01G243300.1	819	458	819	0	TraesCS6A01G243300	chr6A	454711792	454712610	Ethylene-responsive transcription factor
		TRINITY_DN33330_c0_g1	2.43738	3.79e-05	0.000376032	TraesCS2B01G010500.1	1	383	618	0	TraesCS2B01G010500	chr2B	5684865	5689380	WRKY transcription factor
		TRINITY_DN4644_c0_g2	2.43167	0.0344301	0.116123	TraesCS2B01G589700.1	248	1	912	3.74e-113	TraesCS2B01G589700	chr2B	776209402	776214084	Myb family transcription factor family protein
		TRINITY_DN10111_c0_g1	2.41902	3.01e-07	5.12e-06	TraesCS7D01G127600.1	1	210	540	7.74e-107	TraesCS7D01G127600	chr7D	79964087	79964626	Ethylene-responsive transcription factor
		TRINITY_DN30561_c1_g1	2.41665	0.0119864	0.0518217	TraesCS7B01G078300.1	799	571	2217	9.02e-108	TraesCS7B01G078300	chr7B	88245247	88247463	Scarecrow transcription factor family protein
		TRINITY_DN18070_c0_g1	2.41305	5.94e-06	7.19e-05	TraesCS2A01G174300.3	622	691	804	6.54e-29	TraesCS2A01G174300	chr2A	132859856	132876424	MADS box transcription factor
		TRINITY_DN18201_c0_g1	2.4092	6.27e-13	3.27e-11	TraesCS5A01G314700.1	281	1191	1191	0	TraesCS5A01G314700	chr5A	525078041	525079362	Heat shock transcription factor
		TRINITY_DN99562_c0_g1	2.40467	0.000980351	0.00656445	TraesCS6A01G108800.1	384	1244	1248	0	TraesCS6A01G108800	chr6A	77536958	77539002	Myb-like transcription factor family protein
		TRINITY_DN29031_c0_g1	2.39111	0.000122504	0.00107773	TraesCS3B01G407700.1	1	253	531	1.58e-127	TraesCS3B01G407700	chr3B	643256656	643257634	MYB transcription factor
		TRINITY_DN25294_c0_g1	2.3761	0.000807172	0.00556985	TraesCS3D01G364200.1	509	784	3630	1.67e-135	TraesCS3D01G364200	chr3D	477904581	477913599	General transcription factor 3C polypeptide 2
		TRINITY_DN111176_c0_g2	2.37083	0.0212301	0.0806002	TraesCS7A01G542700.1	341	495	495	9.14e-60	TraesCS7A01G542700	chr7A	719470499	719472862	Transcription factor
		TRINITY_DN44136_c1_g1	2.36433	0.000170032	0.00144159	TraesCS3B01G199000.1	633	880	1731	2.51e-128	TraesCS3B01G199000	chr3B	226787232	226790114	WRKY transcription factor
		TRINITY_DN31174_c0_g1	2.34033	0.00126198	0.00815111	TraesCS5A01G391700.1	262	319	735	2.76e-20	TraesCS5A01G391700	chr5A	587411824	587423240	MADS box transcription factor
		TRINITY_DN3286_c2_g1	2.32882	1.21e-08	2.86e-07	TraesCS3D01G173300.2	1	970	1911	0	TraesCS3D01G173300	chr3D	154179658	154182152	WRKY transcription factor
		TRINITY_DN2903_c0_g2	2.31569	3.47e-07	5.82e-06	TraesCS5A01G237900.1	1	301	897	1.24e-150	TraesCS5A01G237900	chr5A	454397096	454401145	Heat stress transcription factor
		TRINITY_DN94406_c0_g1	2.31014	0.0277663	0.0989022	TraesCS4B01G375100.1	4916	4972	7227	4.64e-22	TraesCS4B01G375100	chr4B	659154419	659172921	CCR4-NOT transcription complex subunit 1
		TRINITY_DN26455_c0_g1	2.30874	0.00235838	0.0137919	TraesCS2B01G396500.1	391	456	456	2.45e-21	TraesCS2B01G396500	chr2B	563029908	563030363	AP2-like ethylene-responsive transcription factor SNZ
		TRINITY_DN76663_c1_g1	2.30644	0.000335191	0.002612	TraesCS3B01G411300.1	580	672	753	5.69e-42	TraesCS3B01G411300	chr3B	647820086	647822817	Transcription factor
		TRINITY_DN83009_c0_g1	2.27393	0.00456901	0.0239419	TraesCS4A01G139300.3	2408	2478	2478	6.37e-30	TraesCS4A01G139300	chr4A	210162666	210169894	Transcription factor jumonji domain protein
		TRINITY_DN14194_c0_g1	2.26064	0.00112903	0.00740927	TraesCS5A01G391700.1	122	185	735	1.84e-25	TraesCS5A01G391700	chr5A	587411824	587423240	MADS box transcription factor
		TRINITY_DN13481_c0_g1	2.23835	9.7e-05	0.000877107	TraesCS4D01G298400.1	1	390	948	5.48e-167	TraesCS4D01G298400	chr4D	467635222	467636744	Ethylene-responsive transcription factor
		TRINITY_DN71500_c0_g3	2.23808	0.00426575	0.0225974	TraesCS3B01G411300.1	1	184	753	9.83e-81	TraesCS3B01G411300	chr3B	647820086	647822817	Transcription factor
		TRINITY_DN42131_c2_g1	2.23737	0.00455906	0.0238943	TraesCS1B01G322000.1	721	511	852	7.73e-108	TraesCS1B01G322000	chr1B	546528780	546533951	Nuclear transcription factor Y protein
		TRINITY_DN3192_c0_g1	2.23284	3.39e-09	8.9e-08	TraesCS5B01G236400.1	202	897	897	0	TraesCS5B01G236400	chr5B	417438436	417443406	Heat stress transcription factor
		TRINITY_DN7926_c0_g1	2.19129	0.000222455	0.00182257	TraesCS1A01G231200.1	94	300	543	2.46e-103	TraesCS1A01G231200	chr1A	403830530	403831202	Ethylene-responsive transcription factor
		TRINITY_DN11048_c0_g1	2.18451	3.8e-08	8.01e-07	TraesCS2B01G396500.1	1	456	456	0	TraesCS2B01G396500	chr2B	563029908	563030363	AP2-like ethylene-responsive transcription factor SNZ
		TRINITY_DN78482_c0_g1	2.16481	0.0247374	0.0907175	TraesCS4D01G326100.1	279	369	369	2.31e-39	TraesCS4D01G326100	chr4D	485952605	485952973	Transcription activator-like protein
		TRINITY_DN89270_c0_g1	2.15389	0.00193349	0.0116882	TraesCS7D01G092400.1	1	336	1818	5.63e-157	TraesCS7D01G092400	chr7D	55266872	55270930	WRKY family transcription factor
		TRINITY_DN41841_c0_g1	2.14993	0.000379048	0.00290587	TraesCS7A01G488600.1	516	658	753	3.21e-68	TraesCS7A01G488600	chr7A	678969517	678971043	Basic-leucine zipper (BZIP) transcription factor family
		TRINITY_DN7487_c0_g1	2.13505	2.17e-07	3.84e-06	TraesCS4B01G176700.1	1	621	621	0	TraesCS4B01G176700	chr4B	386749985	386750980	WRKY transcription factor
		TRINITY_DN30752_c1_g1	2.11407	0.0108958	0.0481128	TraesCS2B01G506100.1	268	560	1191	2.93e-148	TraesCS2B01G506100	chr2B	701484059	701485249	Mitochondrial transcription termination factor-like
		TRINITY_DN28172_c0_g1	2.11146	0.00463043	0.024202	TraesCS6B01G297500.1	270	483	483	4.48e-109	TraesCS6B01G297500	chr6B	534095940	534096422	Trihelix transcription factor GT-3b
		TRINITY_DN51655_c0_g1	2.10382	0.00195847	0.0118099	TraesCS3D01G252400.1	149	209	780	1.93e-23	TraesCS3D01G252400	chr3D	352952346	352957544	MYB-related transcription factor
		TRINITY_DN37162_c0_g2	2.10108	0.000561415	0.00408038	TraesCS3D01G267500.1	253	5	651	7.05e-124	TraesCS3D01G267500	chr3D	371365606	371368381	Transcription initiation factor TFIID subunit 11
		TRINITY_DN19446_c0_g1	2.07782	4.15e-05	0.000408119	TraesCS3A01G442600.1	288	879	879	0	TraesCS3A01G442600	chr3A	684520348	684522294	Basic helix-loop-helix (BHLH) Transcription Factor
		TRINITY_DN17982_c0_g1	2.06294	0.00104535	0.00694036	TraesCS2B01G469000.1	164	268	741	3.52e-45	TraesCS2B01G469000	chr2B	664933026	664935104	PLATZ transcription factor
		TRINITY_DN38274_c0_g2	2.0572	7.73e-07	1.18e-05	TraesCS5B01G236400.1	1	273	897	8.66e-134	TraesCS5B01G236400	chr5B	417438436	417443406	Heat stress transcription factor
		TRINITY_DN13573_c0_g1	2.05618	1.47e-06	2.08e-05	TraesCS4B01G112700.1	1	200	1299	1.03e-101	TraesCS4B01G112700	chr4B	126728907	126730205	Transcription factor, putative
		TRINITY_DN25534_c0_g1	2.05357	5.55e-05	0.000530548	TraesCS7B01G276200.1	220	285	285	6.24e-27	TraesCS7B01G276200	chr7B	505475435	505475719	HTH-type transcriptional repressor AllR
		TRINITY_DN8028_c0_g1	2.04444	4.08e-05	0.000401676	TraesCS6D01G225500.1	510	822	822	2.76e-162	TraesCS6D01G225500	chr6D	317105411	317106442	Ethylene-responsive transcription factor
		TRINITY_DN4447_c0_g3	2.01333	0.0124608	0.0533931	TraesCS5A01G449300.1	1878	1674	1983	8.98e-98	TraesCS5A01G449300	chr5A	631465621	631474219	Transcription initiation factor TFIID subunit 8
